# Supplementary material for: Use of signals of positive and negative selection to distinguish cancer genes and passenger genes
Source: eLife journal article supplement (doi:10.7554/elife.59629), 2021-01-11
Supplement: supp [file elife_poa_e59629_Supplementary_file_25.docx]

**Supplementary file 25**

**Expected fractions of nonsense, missense and silent substitutions of various codons in the absence of selection assuming that only C>A or C>G or C>T or T>A or T>C or T>G mutations occur**

**Amino acid mutation nucleotide substitution**

C>A C>G C>T T>A T>C T>G

**Nonsense** 0.07447 0.02128 0.05319 0.07865 0.00000 0.02247

**Missense** 0.72340 0.80851 0.61702 0.71910 0.65169 0.76404

**Silent**  0.20213 0.17021 0.32979 0.20225 0.34831 0.21348

The fractions of nonsense, missense and silent amino acid mutations of individual codons are shown in Supplementary files 18-24.
