# Supplementary material for: Use of signals of positive and negative selection to distinguish cancer genes and passenger genes
Source: eLife. 2021 Jan 11;10:e59629. doi: 10.7554/eLife.59629 (PMC7877913; doi:10.7554/eLife.59629)
Supplement: Supplementary file 1. — Transcripts of OGs (oncogenes) and TSGs (tumor suppressor genes) of the cancer gene list of Vogelstein et al., 2013 are highlighted by brick red and blue backgrounds, respectively. Transcripts of CGC genes (SON, Sondka et al., 2018) that do not correspond to OGs or TSGs of the cancer gene list of Vogelstein et al., 2013 are highlighted by yellow background. Novel positively or negatively selected cancer genes validated in the present work are highlighted in dark green background. [file elife-59629-supp1.xlsx]

## Sheet: CG_SO2SD_rMSN>3.00 
Gene symbol	rMSN	VOG list (58 out of 125)	TAM list (69 out of 291)	LAW list (60 out 224)	ABB list (193 out of 9488)	TOR list (12 out of 210)	ZHO list (49 out of 365)	MAR list (54 out of 221)	BAI list 86 out of 299)	SON list (120 out of 723)	ZHA list (4 out of 159)
KRAS	221.104	KRAS	KRAS	KRAS	KRAS		KRAS	KRAS	KRAS	KRAS
KRAS_ENST00000256078	123.154
IDH1	90.0476	IDH1	IDH1	IDH1	IDH1		IDH1	IDH1	IDH1	IDH1
NRAS	89.5625	NRAS	NRAS	NRAS	NRAS			NRAS	NRAS	NRAS
PIK3CA	60.4632	PIK3CA	PIK3CA	PIK3CA	PIK3CA		PIK3CA	PIK3CA	PIK3CA	PIK3CA
DUX4L1	57									DUX4L1
PIK3CA_ENST00000263967	54.8026
BRAF	50.2653	BRAF	BRAF	BRAF	BRAF		BRAF	BRAF	BRAF	BRAF
HRAS	48.1333	HRAS	HRAS	HRAS	HRAS			HRAS	HRAS	HRAS
CTNNB1	34.4648	CTNNB1	CTNNB1	CTNNB1	CTNNB1		CTNNB1	CTNNB1	CTNNB1	CTNNB1
H3F3A	32.125	H3F3A							H3F3A	H3F3A
HRAS_ENST00000397594	25.3571
MYD88	21.1053	MYD88		MYD88					MYD88	MYD88
JAK2	18.0707	JAK2	JAK2		JAK2				JAK2	JAK2
SF3B1	17.3182	SF3B1	SF3B1	SF3B1	SF3B1		SF3B1		SF3B1	SF3B1
GNAS	16.6585	GNAS	GNAS		GNAS				GNAS	GNAS
RHOA	16.1111		RHOA	RHOA	RHOA		RHOA	RHOA	RHOA	RHOA
SPOP	15.92	SPOP	SPOP	SPOP	SPOP		SPOP	SPOP	SPOP	SPOP
IDH2	14.5385	IDH2	IDH2	IDH2	IDH2		IDH2	IDH2	IDH2	IDH2
NFE2L2	14.25	NFE2L2	NFE2L2	NFE2L2	NFE2L2		NFE2L2	NFE2L2	NFE2L2	NFE2L2
U2AF1	13.6522	U2AF1	U2AF1	U2AF1	U2AF1			U2AF1	U2AF1	U2AF1
ERCC2_ENST00000485403	13.1538
EIF1AX	13				EIF1AX			EIF1AX	EIF1AX	EIF1AX
FGFR3	12.9565	FGFR3	FGFR3	FGFR3	FGFR3			FGFR3	FGFR3	FGFR3
AKT1	12.0513	AKT1	AKT1	AKT1	AKT1			AKT1	AKT1	AKT1
SRSF2	12.0476	SRSF2			SRSF2				SRSF2	SRSF2
MED12	12.0129	MED12	MED12	MED12	MED12				MED12	MED12
KCNJ5	11.3929									KCNJ5
ERBB2_ENST00000541774	11.2979
FOXL2	10.6522	FOXL2								FOXL2
U2AF1_ENST00000380276	10.5417
PRB3	9.71429
EGFR	9.67797	EGFR	EGFR	EGFR	EGFR			EGFR	EGFR	EGFR
MAP2K1	9.07407	MAP2K1		MAP2K1	MAP2K1			MAP2K1	MAP2K1	MAP2K1
ERBB2	8.59406	ERBB2	ERBB2	ERBB2	ERBB2			ERBB2	ERBB2	ERBB2
AR_ENST00000396043	8.48
RAC1	8.27778		RAC1	RAC1	RAC1			RAC1	RAC1	RAC1
KLHL23	8.09091
ERBB3_ENST00000411731	8.0625
MYCN	7.9375			MYCN	MYCN				MYCN	MYCN
PTPRS_ENST00000262963	7.85106
ERBB3_ENST00000267101	7.81609
PRB3_ENST00000538488	7.76471
KIT	7.648	KIT	KIT	KIT	KIT			KIT	KIT	KIT
PTPN11	7.36508	PTPN11	PTPN11	PTPN11	PTPN11			PTPN11	PTPN11	PTPN11
RUNX1_ENST00000344691	7.29412
RAC1_ENST00000356142	7.2
RARA_ENST00000394081	7.13043
RUNX1_ENST00000325074	7.05882
PPP2R1A	7.01818	PPP2R1A	PPP2R1A	PPP2R1A	PPP2R1A			PPP2R1A	PPP2R1A	PPP2R1A
EGFR_ENST00000342916	7
ERCC2_ENST00000391945	6.93182
TXLNA	6.85714				TXLNA
ERBB3	6.82692			ERBB3	ERBB3		ERBB3	ERBB3	ERBB3	ERBB3
ZNF844	6.8		ZNF844
TBL1XR1	6.75862		TBL1XR1	TBL1XR1	TBL1XR1				TBL1XR1	TBL1XR1
YAP1_ENST00000282441	6.65
SSX5	6.63158
JAK3_ENST00000534444	6.59375
MDM2	6.59091				MDM2					MDM2
ESR1	6.55882		ESR1		ESR1				ESR1	ESR1
PIAS2	6.55556				PIAS2
RSL1D1	6.53333				RSL1D1
RECQL4	6.48936				RECQL4					RECQL4
TRAF7	6.46341	TRAF7			TRAF7					TRAF7
RARA	6.44828				RARA				RARA	RARA
FLT3	6.40196	FLT3	FLT3	FLT3	FLT3			FLT3	FLT3	FLT3
FGFR3_ENST00000340107	6.39506
GATA2	6.39024	GATA2								GATA2
FGFR2	6.36145	FGFR2	FGFR2	FGFR2	FGFR2		FGFR2	FGFR2	FGFR2	FGFR2
EGFR_ENST00000442591	6.325
HIST1H3B	6.3125	HIST1H3B		HIST1H3B	HIST1H3B			HIST1H3B		HIST1H3B
EZH2	6.29687	EZH2	EZH2	EZH2	EZH2	EZH2		EZH2	EZH2	EZH2
YAP1	6.29412				YAP1
C7orf72	6.28571
FH	6.25									FH
FGFR2_ENST00000357555	6.25
FOXA1	6.24		FOXA1	FOXA1				FOXA1	FOXA1	FOXA1
GATA1_ENST00000376665	6.17647
FGFR2_ENST00000369056	6.16667
MDM2_ENST00000462284	6.13636
FBXW7_ENST00000393956	6.12698
PIK3C2G_ENST00000538779	6.09859
SMO	6.04167	SMO								SMO
TROAP	6.03704					TROAP
TP53_ENST00000545858	6.01497
KLF4	6	KLF4								KLF4
RUNX1_ENST00000486278	5.95833
FGFR2_ENST00000457416	5.94366
KLHL5_ENST00000359687	5.90909
MYD88_ENST00000417037	5.89474
FGFR2_ENST00000351936	5.88732
IRS2	5.88333		IRS2		IRS2
NXPE1	5.85714
FAM55A	5.85
CHEK1	5.85				CHEK1
EZH2_ENST00000350995	5.83333
OGT	5.82143				OGT
RIT1	5.8125			RIT1	RIT1	RIT1			RIT1
CHD1L_ENST00000369258	5.77778
HNF1A_ENST00000543427	5.77778
PRKCI	5.75				PRKCI
POLG2	5.73333				POLG2
KLHL5_ENST00000381930	5.72727
MAX_ENST00000284165	5.70588
GNA11	5.69767	GNA11			GNA11				GNA11	GNA11
MAX_ENST00000556979	5.6875
PREPL	5.68421				PREPL
TSHR	5.67143	TSHR								TSHR
MED12_ENST00000333646	5.67059
TRAFD1	5.66667				TRAFD1
TAF1	5.62687		TAF1		TAF1		TAF1		TAF1
NDUFS1	5.55556						NDUFS1
REL	5.55556				REL					REL
TAF1_ENST00000276072	5.48438
OGT_ENST00000373719	5.48276
ITGBL1	5.46667				ITGBL1
KLHL5	5.46154
TMTC3	5.45833						TMTC3
IDH3B	5.4375
U2SURP	5.43333				U2SURP
IGF1_ENST00000307046	5.42105
GNAS_ENST00000371100	5.39655
ENSG00000174501	5.37209
TCF12_ENST00000452095	5.36364
STAT5B	5.35897				STAT5B					STAT5B
KEAP1	5.3301		KEAP1	KEAP1	KEAP1			KEAP1	KEAP1	KEAP1
HNRNPK	5.31579				HNRNPK
ZNF711	5.31429
XPO1	5.29091			XPO1	XPO1				XPO1	XPO1
U2AF2	5.28571				U2AF2
CCNE1	5.27273									CCNE1
KMO	5.26087
SGIP1_ENST00000371039	5.25
TP53_ENST00000455263	5.23234
CXXC1	5.21429
RET	5.21341	RET							RET	RET
CHEK2_ENST00000382580	5.2
SMC1A	5.2		SMC1A	SMC1A	SMC1A		SMC1A	SMC1A	SMC1A	SMC1A
NT5C2	5.18182				NT5C2					NT5C2
GNE	5.18182				GNE
CHD1L	5.17857
PARN_ENST00000437198	5.17647
POTEM_ENST00000551509	5.17391
BRIP1	5.17188				BRIP1					BRIP1
DENND4C	5.17073				DENND4C
TRIM48	5.16216
TP53_ENST00000420246	5.1407
BRIP1_ENST00000259008	5.12698
EGFR_ENST00000344576	5.11905
MANEA	5.11765				MANEA
ANKRD56	5.1
PIAS2_ENST00000324794	5.1
GNE_ENST00000396594	5.09091
MAPK1	5.08333				MAPK1				MAPK1	MAPK1	MAPK1
RAD50_ENST00000265335	5.07937
TRIM48_ENST00000417545	5.07895
RAF1	5.06522				RAF1				RAF1	RAF1
N4BP2L2	5.05882				N4BP2L2
SAG_ENST00000409110	5.05556
PARN	5.05556				PARN
TRIM23	5.05556			TRIM23	TRIM23
ZNF354B	5.05556
CDC23	5.05263				CDC23
CHEK2	5.05		CHEK2		CHEK2				CHEK2	CHEK2
TCF12_ENST00000438423	5.04348
BCL6	5.03922									BCL6
MDM4	5.03846									MDM4
TP53_ENST00000413465	5.02953
DIS3	5.01923			DIS3	DIS3
TAF1_ENST00000449580	4.96774
MCMDC2	4.95833
MCMDC2_ENST00000422365	4.95833
DDX17_ENST00000381633	4.95833
C8orf45	4.95652
PHACTR2	4.95455
USP8	4.95				USP8					USP8
NOTCH4	4.94697
LARGE_ENST00000452586	4.94444
CYP39A1	4.94118
RBM25	4.93939				RBM25		RBM25
BARD1	4.92683		BARD1							BARD1
TCF12	4.92308		TCF12		TCF12			TCF12	TCF12	TCF12
MPL	4.92	MPL			MPL					MPL
FBXO11	4.90909		FBXO11		FBXO11					FBXO11
PPHLN1_ENST00000432191	4.90476
G3BP2	4.89474				G3BP2		G3BP2
SAG	4.88889				SAG
BARD1_ENST00000260947	4.875
RAF1_ENST00000442415	4.86957
ENPP4	4.86957
ETV1	4.86667				ETV1					ETV1
RNF19A	4.86667				RNF19A
DICER1	4.85507		DICER1		DICER1				DICER1	DICER1
NTRK2_ENST00000304053	4.84615
ZFP37_ENST00000553380	4.84615
GTF2E1	4.84211				GTF2E1
HNRNPA2B1	4.84211				HNRNPA2B1					HNRNPA2B1
HNRNPA2B1_ENST00000354667	4.84211
TGFBR2_ENST00000359013	4.83824
ZNF711_ENST00000373165	4.81579
CCDC35	4.80952
CDKAL1	4.78947				CDKAL1
SLC14A1_ENST00000436407	4.78261
PIK3R3	4.77778				PIK3R3
NTRK2_ENST00000395882	4.77419
PKN2	4.76667				PKN2		PKN2
AXL	4.76543				AXL
KPNA5	4.7619						KPNA5
VWC2L	4.7619
AFP	4.7619				AFP
RIOK3	4.7619				RIOK3
ARHGAP11A	4.75
TXNRD1_ENST00000525566	4.73684
ZFP2	4.73077
NONO	4.72727		NONO		NONO		NONO			NONO
KLK15	4.72
ADAM10	4.72		ADAM10		ADAM10
BTNL3	4.72
KLHL7	4.71429				KLHL7
PTPRU_ENST00000323874	4.71429
SUFU	4.71429				SUFU					SUFU
CPSF6	4.70833				CPSF6		CPSF6
CPSF6_ENST00000435070	4.70833
PIK3C2G	4.704				PIK3C2G
MYC	4.7037				MYC			MYC	MYC	MYC
GALNTL5	4.69565				GALNTL5
KDM5A	4.69474				KDM5A					KDM5A
KDM5A_ENST00000399788	4.69474
MGAT4C_ENST00000393205	4.69231
MTOR	4.68687		MTOR	MTOR	MTOR		MTOR	MTOR	MTOR	MTOR
NTRK2_ENST00000376214	4.68657
SUZ12	4.68571		SUZ12		SUZ12					SUZ12
STAM2	4.68421
PLEKHS1	4.68421				PLEKHS1
MYC_ENST00000377970	4.68421
RAD50	4.68333				RAD50	RAD50
MCMDC2_ENST00000313616	4.68182
NTRK2	4.68116
SOX2	4.68									SOX2
CFHR3	4.67857
DDX17	4.67857				DDX17						DDX17
GNAQ	4.67308	GNAQ			GNAQ				GNAQ	GNAQ
PIK3C2G_ENST00000433979	4.66935
AGTPBP1_ENST00000376109	4.66667
XRCC6	4.66667				XRCC6
HDX	4.65625						HDX
FGF3	4.65385
TRDN	4.65				TRDN
NAA35	4.65				NAA35		NAA35
YES1	4.64516				YES1
DDX3X	4.64			DDX3X	DDX3X		DDX3X	DDX3X	DDX3X	DDX3X
PSPC1	4.63636				PSPC1		PSPC1
MED12_ENST00000374080	4.63087
SUPT16H	4.62162				SUPT16H
MMP13	4.62069
ALK	4.62051	ALK		ALK					ALK	ALK
TMEM161B	4.61905				TMEM161B
PLCG1	4.61798		PLCG1		PLCG1				PLCG1	PLCG1
MAPK9_ENST00000452135	4.61111
ERLEC1	4.61111				ERLEC1
TJAP1_ENST00000372445	4.61111
NBN	4.60976									NBN
CENPI	4.60714
PIK3CB	4.60317		PIK3CB		PIK3CB				PIK3CB	PIK3CB
TJAP1	4.6				TJAP1		TJAP1
MAX	4.6		MAX		MAX		MAX	MAX	MAX	MAX
EXOC1	4.6				EXOC1		EXOC1
ZNF626_ENST00000392298	4.59016
FANCC_ENST00000289081	4.58065
RAD51B_ENST00000487270	4.57895
HOMEZ_ENST00000357460	4.57895
PDS5A	4.57778				PDS5A
BICC1_ENST00000263103	4.57692
PITRM1_ENST00000451104	4.57576
MAP9	4.56667
TBX3	4.56627		TBX3	TBX3				TBX3	TBX3	TBX3
ETV6	4.56364				ETV6					ETV6
CASD1	4.5625				CASD1
POLE	4.55932			POLE	POLE				POLE	POLE
THOC2	4.55932				THOC2
TP53	4.55743	TP53	TP53	TP53	TP53		TP53	TP53	TP53	TP53
ABLIM1_ENST00000392952	4.55556
AGAP6	4.55
SLC14A1	4.54545
ACCN5	4.53571
LUZP4	4.52381						LUZP4
NOX5_ENST00000388866	4.52
CCND2	4.51852				CCND2					CCND2
FRYL_ENST00000537810	4.51429
RICTOR_ENST00000296782	4.50549
DNMT3A	4.50327	DNMT3A	DNMT3A	DNMT3A	DNMT3A			DNMT3A	DNMT3A	DNMT3A
MYCL1_ENST00000397332	4.5
BIRC2	4.5				BIRC2
TBC1D2B_ENST00000300584	4.5
ZNF649	4.5
PIP5K1C_ENST00000537021	4.5
MARCH7	4.5				MARCH7
TP53_ENST00000269305	4.496
CEP290_ENST00000309041	4.48649
FBXW7_ENST00000534231	4.48634
TBRG4	4.48				TBRG4		TBRG4
CAPS2_ENST00000409445	4.47619
COIL	4.47619				COIL
HOMEZ	4.47368				HOMEZ
MSL3_ENST00000398527	4.47368
CXorf30_ENST00000378657	4.46429
SSX2IP_ENST00000370612	4.45
SLITRK6	4.44615						SLITRK6
FBXO11_ENST00000403359	4.43243
FGF14_ENST00000376143	4.42857
CXorf30	4.42857
ZFP36L2	4.42857		ZFP36L2		ZFP36L2			ZFP36L2	ZFP36L2
NMT2	4.42105				NMT2
C12orf26	4.41379
IRF4_ENST00000380956	4.40984
ANXA10	4.40909
TTC3_ENST00000540756	4.40909
LUM	4.40909		LUM
KAT8	4.40909				KAT8
POTEM	4.40741
POT1_ENST00000357628	4.3617
EED	4.36				EED					EED
JAK1	4.33673	JAK1			JAK1			JAK1	JAK1	JAK1
ERBB4	4.33484				ERBB4			ERBB4	ERBB4	ERBB4
USO1_ENST00000538159	4.33333
AXIN2	4.33333		AXIN2	AXIN2					AXIN2	AXIN2
BIRC3	4.32353				BIRC3					BIRC3
LRRD1	4.26316				LRRD1		LRRD1
SHQ1	4.25926				SHQ1
XRN1	4.25862				XRN1		XRN1
POT1	4.2549					POT1	POT1			POT1
TGFBR2	4.25301		TGFBR2	TGFBR2	TGFBR2			TGFBR2	TGFBR2	TGFBR2
BRCA1_ENST00000471181	4.23077
GPSM2	4.22727				GPSM2		GPSM2
MIS18BP1	4.20513				MIS18BP1
CD79B	4.18519			CD79B	CD79B				CD79B	CD79B
ERBB4_ENST00000402597	4.18009
RIOK2	4.13043
ATR	4.11765		ATR		ATR	ATR			ATR	ATR
FBXW7_ENST00000296555	4.11558
FBXW7	4.10345	FBXW7	FBXW7	FBXW7	FBXW7		FBXW7	FBXW7	FBXW7	FBXW7
ZFP37	4.0625
ANKRD31_ENST00000274361	4.05556
FBXW7_NM_018315_2	4.0514
ERRFI1	4.03846				ERRFI1
SMARCA4_ENST00000358026	4.03333
PPP6C_ENST00000451402	4
DDX4_ENST00000511853	4
PLK2	4
MRE11A_ENST00000323929	3.97917
AURKA	3.96875
BRCA1	3.96063	BRCA1	BRCA1	BRCA1	BRCA1			BRCA1	BRCA1	BRCA1
FBXW7_ENST00000281708	3.95154
ACVR1B	3.94595	ACVR1B	ACVR1B	ACVR1B	ACVR1B		ACVR1B	ACVR1B	ACVR1B
BRCA2_ENST00000544455	3.94064
KIAA1731_ENST00000411936	3.93182
SMAD3	3.92188				SMAD3					SMAD3
TGFBR1	3.91525				TGFBR1
HGF	3.90164		HGF						HGF
HNF1A	3.90123	HNF1A			HNF1A					HNF1A
DLAT	3.86957				DLAT
PPP6C	3.85714			PPP6C	PPP6C			PPP6C	PPP6C	PPP6C
TUBD1	3.85714				TUBD1
BRCA2	3.82833	BRCA2	BRCA2		BRCA2				BRCA2	BRCA2
SMARCA4	3.81624	SMARCA4	SMARCA4	SMARCA4	SMARCA4	SMARCA4		SMARCA4	SMARCA4	SMARCA4
MRE11A	3.79592					MRE11A
CUL3	3.78333				CUL3			CUL3	CUL3	CUL3	CUL3
SLC3A2	3.77273				SLC3A2
EP300	3.75217	EP300	EP300	EP300	EP300			EP300	EP300	EP300
EPHA3_ENST00000452448	3.73
PMS1	3.7						PMS1		PMS1	PMS1
TCHP	3.68182						TCHP
TP53_ENST00000414315	3.63239
DDX4_ENST00000505374	3.62857
DDX4	3.59459				DDX4		DDX4
CEBPA	3.58333	CEBPA	CEBPA	CEBPA	CEBPA			CEBPA	CEBPA	CEBPA
PDCD1	3.5625
AIM2	3.54167				AIM2	AIM2
TTK_ENST00000369798	3.5
MAP7D1	3.48718				MAP7D1
TNFRSF14_ENST00000355716	3.47826
RUNX1	3.47059	RUNX1	RUNX1	RUNX1	RUNX1			RUNX1	RUNX1	RUNX1
CDC73	3.46429	CDC73	CDC73		CDC73					CDC73
PIK3R3_ENST00000540385	3.46154
LATS1_ENST00000253339	3.45631
RTN4_ENST00000337526	3.45
TAF1B	3.43478
TTK	3.40476				TTK	TTK
ATM	3.39452	ATM	ATM	ATM	ATM		ATM	ATM	ATM	ATM
CASP5_ENST00000393141	3.39394
SLC27A3	3.37037				SLC27A3
LATS1_ENST00000543571	3.34951
ATM_ENST00000278616	3.33754
SBNO1	3.33333				SBNO1						SBNO1
COBLL1	3.31746				COBLL1
CDK8	3.29787				CDK8
GSK3B_ENST00000316626	3.2973
TMPO_ENST00000266732	3.2963
CLOCK	3.29412				CLOCK
UPF3B	3.28571						UPF3B
C18orf34	3.28378
EFHA2	3.28125
FETUB	3.26667
C18orf34_ENST00000383096	3.25641
C2orf67	3.25641
BRE	3.25
ROCK2	3.25				ROCK2
OR6C75	3.25
CENPC1	3.24242
C9orf131	3.21277				C9orf131
NOTCH2	3.20248	NOTCH2			NOTCH2				NOTCH2	NOTCH2
SMAD4	3.2	SMAD4	SMAD4	SMAD4	SMAD4		SMAD4	SMAD4	SMAD4	SMAD4
CAPN7	3.1875				CAPN7
GOLGA5_ENST00000163416	3.16667
SLC22A4	3.16667
C14orf39	3.16327				C14orf39
SEC63	3.16216				SEC63
NCOR1_ENST00000436828	3.16129
MTF2	3.16				MTF2	MTF2
ANO10	3.15625				ANO10
POLM	3.15385
KDM5C_ENST00000452825	3.14286
SENP1_ENST00000448372	3.14286
CEP290	3.13953						CEP290
WDR47_ENST00000400794	3.13514
MALT1_ENST00000348428	3.13043
CWF19L2_ENST00000282251	3.11905
SERPINB10	3.11538
ATAD2	3.1125				ATAD2	ATAD2	ATAD2
KDM5C	3.10072	KDM5C	KDM5C	KDM5C	KDM5C			KDM5C	KDM5C	KDM5C
PHACTR4	3.09677				PHACTR4
RAD21	3.08955		RAD21	RAD21	RAD21				RAD21	RAD21
AASDH_ENST00000502617	3.08824
DNA2	3.05
CEP135	3.03922						CEP135
PUS7	3.0303
CPEB2	3.02778				CPEB2
TNPO1	3.02632				TNPO1
LATS1_ENST00000392273	3.01538

## Sheet: CG_SSI2SD_rNSM> 0.125 
Gene symbol	indel_rNSM	VOG list (58 out of 125)	TAM list (65 out of 291)	LAW list (64 out of 224)	ABB list (280 out of 9488)	TOR list (16 out of 210)	ZHO list (33 out of 365)	MAR list (88 out of 221)	BAI list (96 out of 299)	SON list (101 out of 723)	ZHA list (10 out of 159)
APC	2.97801	APC	APC	APC	APC			APC	APC	APC
RPL22	2.84375		RPL22		RPL22			RPL22	RPL22	RPL22
NF2	1.99095	NF2			NF2			NF2	NF2	NF2
RB1	1.3531	RB1	RB1	RB1	RB1		RB1	RB1	RB1	RB1
ACVR2A	1.34197				ACVR2A		ACVR2A	ACVR2A	ACVR2A	ACVR2A
RB1_ENST00000267163	1.21407
ARID1A	1.16502	ARID1A	ARID1A	ARID1A	ARID1A			ARID1A	ARID1A	ARID1A
RNF43	0.922865	RNF43	RNF43		RNF43			RNF43	RNF43	RNF43
CDKN1B	0.830986		CDKN1B	CDKN1B	CDKN1B			CDKN1B	CDKN1B	CDKN1B
AKAP7	0.825397				AKAP7
CCR4	0.79798									CCR4
NF2_ENST00000403999	0.795322
PBRM1	0.712281	PBRM1	PBRM1	PBRM1	PBRM1		PBRM1	PBRM1	PBRM1	PBRM1
VHL	0.655172	VHL	VHL	VHL			VHL	VHL	VHL	VHL
TET2	0.647436	TET2	TET2	TET2	TET2			TET2	TET2	TET2
CDKN2A_ENST00000446177	0.64346
TET2_ENST00000305737	0.626911
PBRM1_ENST00000356770	0.623446
PBRM1_ENST00000296302	0.622924
QKI_ENST00000275262	0.614458
CDKN2A_ENST00000498124	0.613924
PTEN	0.584406	PTEN	PTEN	PTEN	PTEN		PTEN	PTEN	PTEN	PTEN
PPM1D	0.58125			PPM1D	PPM1D			PPM1D	PPM1D	PPM1D
CDKN2A	0.576159	CDKN2A	CDKN2A	CDKN2A	CDKN2A			CDKN2A	CDKN2A	CDKN2A
BMPR2	0.536946				BMPR2			BMPR2
AMER1	0.532033				AMER1			AMER1	AMER1	AMER1
STK11	0.530351	STK11	STK11	STK11	STK11			STK11	STK11	STK11
MEN1	0.511706	MEN1			MEN1			MEN1	MEN1	MEN1
RBM10	0.511429			RBM10	RBM10			RBM10	RBM10	RBM10
NF1	0.501783	NF1	NF1	NF1	NF1			NF1	NF1	NF1
PHF6	0.495413	PHF6	PHF6	PHF6	PHF6			PHF6	PHF6	PHF6
HLA-A	0.488		HLA-A	HLA-A	HLA-A			HLA-A	HLA-A	HLA-A
STK11_ENST00000326873	0.487179
B2M	0.483871	B2M	B2M	B2M	B2M			B2M	B2M	B2M
TCF7L2_ENST00000355717	0.481633
ARID2	0.467049	ARID2	ARID2		ARID2			ARID2	ARID2	ARID2
STAMBPL1	0.464286				STAMBPL1
WNT16	0.461538				WNT16
STAMBPL1_ENST00000371927	0.45977
ASXL1	0.451429	ASXL1	ASXL1	ASXL1	ASXL1			ASXL1	ASXL1	ASXL1
PHF6_ENST00000332070	0.450549
XYLT2	0.44375				XYLT2						XYLT2
ZNF233	0.431193
LMAN1	0.428571				LMAN1
SMARCB1	0.427928	SMARCB1		SMARCB1					SMARCB1	SMARCB1
KDM6A	0.427549	KDM6A	KDM6A	KDM6A	KDM6A			KDM6A	KDM6A	KDM6A
SOX9	0.426009	SOX9			SOX9			SOX9	SOX9
BAP1	0.424528	BAP1	BAP1	BAP1	BAP1		BAP1	BAP1	BAP1	BAP1
QKI_ENST00000392127	0.416667
QKI_ENST00000453779	0.416667
FAM123B_ENST00000330258	0.416092
CCR7	0.41573				CCR7					CCR7
MXRA8	0.41573
NF1_ENST00000444181	0.409396
MVK	0.406977
NF1_ENST00000358273	0.402927
LARP4B	0.402439				LARP4B					LARP4B
PRRT2	0.4							PRRT2
SETD2_ENST00000409792	0.398734
SETD2	0.39628	SETD2	SETD2	SETD2	SETD2		SETD2	SETD2	SETD2	SETD2
HLA-A_ENST00000376806	0.390476
ASXL1_ENST00000306058	0.387368
B2M_ENST00000544417	0.383459
AXIN1	0.380615	AXIN1			AXIN1			AXIN1	AXIN1	AXIN1
QKI	0.380435			QKI	QKI					QKI
SMAD2	0.37931	SMAD2	SMAD2	SMAD2	SMAD2			SMAD2	SMAD2	SMAD2
CDH1	0.377282	CDH1	CDH1	CDH1	CDH1			CDH1	CDH1	CDH1
TTK	0.371429				TTK	TTK
CASP8	0.366972	CASP8	CASP8	CASP8	CASP8		CASP8	CASP8	CASP8	CASP8
MSH6	0.366162	MSH6			MSH6	MSH6			MSH6	MSH6
CASP8_ENST00000264275	0.363946
WNT16_ENST00000361301	0.363636
STAG2	0.360558	STAG2	STAG2	STAG2	STAG2			STAG2	STAG2	STAG2
CASP8_ENST00000358485	0.358025
KDM6A_ENST00000382899	0.354776
CEBPA	0.352941	CEBPA	CEBPA	CEBPA	CEBPA			CEBPA	CEBPA	CEBPA
KDM6A_ENST00000377967	0.352601
CDC7	0.352273					CDC7
KMT2D	0.351109				KMT2D			KMT2D	KMT2D	KMT2D
PIK3R1_ENST00000320694	0.34375
RNF128_ENST00000324342	0.342593
MLL2_ENST00000301067	0.342342
PIK3R1_ENST00000336483	0.341085
TCF7L2	0.337979		TCF7L2	TCF7L2	TCF7L2			TCF7L2	TCF7L2	TCF7L2
TAF1B	0.336842
PIK3R1	0.336111	PIK3R1	PIK3R1	PIK3R1	PIK3R1		PIK3R1	PIK3R1	PIK3R1	PIK3R1
MSH2	0.33574	MSH2			MSH2			MSH2	MSH2	MSH2
DUSP16	0.333333				DUSP16
STAG2_ENST00000218089	0.330544
PHACTR4	0.330508				PHACTR4
CTCF	0.330049		CTCF	CTCF	CTCF			CTCF	CTCF	CTCF
CCDC28A	0.329787
C14orf43	0.328283
ESRP1	0.327778				ESRP1
TCF7L2_ENST00000543371	0.325806
RTKN2	0.322581				RTKN2
FUBP1_ENST00000370768	0.321053
BRD7	0.320611				BRD7			BRD7	BRD7
WT1	0.319749	WT1	WT1	WT1				WT1	WT1	WT1
B3GALT1	0.316239
RBM45	0.315217
CCDC66_ENST00000394672	0.313725
DAZAP1	0.313725				DAZAP1			DAZAP1	DAZAP1
PTCH1	0.307692	PTCH1			PTCH1				PTCH1	PTCH1
TMPO	0.307692				TMPO
TM9SF3	0.306818				TM9SF3
MLH1	0.305556	MLH1						MLH1	MLH1	MLH1
ZNF276	0.305556
TTK_ENST00000369798	0.304094
ZC3H18	0.303483				ZC3H18
SPRED1	0.302326				SPRED1
CBFB_ENST00000412916	0.302083
SMAD4_ENST00000452201	0.3
DHX16_ENST00000376437	0.298851
TP53_ENST00000414315	0.296344
CDKN1A	0.295238		CDKN1A	CDKN1A				CDKN1A	CDKN1A	CDKN1A	CDKN1A
CYLD	0.295082	CYLD	CYLD						CYLD	CYLD
DYNC1I2	0.294737
CPEB2	0.293233				CPEB2
CKAP2	0.292929
CBFB_ENST00000290858	0.292135
CCDC66	0.291667				CCDC66
OLAH	0.291139
ATP6V1B1	0.290323
RASA1_ENST00000456692	0.289562
TCEB3	0.289062
SEC31A_ENST00000432794	0.288462
FUBP1_ENST00000370767	0.288043
FUBP1_ENST00000436586	0.287234
ZNF276_ENST00000443381	0.286957
SMAD4	0.286486	SMAD4	SMAD4	SMAD4	SMAD4		SMAD4	SMAD4	SMAD4	SMAD4
PAX6	0.285714
ATRX	0.285564	ATRX	ATRX		ATRX		ATRX	ATRX	ATRX	ATRX
MBD6	0.284946				MBD6			MBD6
LARP7	0.284211
HLA-B	0.283019		HLA-B	HLA-B				HLA-B	HLA-B
HNRPL	0.283019
RDBP	0.282353
ZDHHC8	0.28022				ZDHHC8
KMT2C	0.280138				KMT2C			KMT2C	KMT2C	KMT2C
IWS1	0.277778				IWS1
SCLT1_ENST00000281142	0.277372
ATRX_ENST00000373344	0.276619
EIF2AK1_ENST00000536084	0.27619
CDKN1A_ENST00000448526	0.27551
ARFGAP3	0.275
TAP2_ENST00000374897	0.272727
ESRP1_ENST00000433389	0.272727
MLL3_ENST00000355193	0.272464
TEAD2	0.27193				TEAD2
SMARCD2	0.271739				SMARCD2
RASA1	0.271642		RASA1	RASA1	RASA1			RASA1	RASA1		RASA1
SLC3A2	0.269231				SLC3A2
GIGYF2_ENST00000452341	0.267717
ZNF14	0.267606
SLC27A3	0.264151				SLC27A3
TGIF1	0.263736		TGIF1					TGIF1	TGIF1
TCF7L2_ENST00000352065	0.261905
AIM2	0.26				AIM2	AIM2
TBC1D23_ENST00000394144	0.258929
USP45	0.258929				USP45
CENPC1	0.257812
TSC1_ENST00000403810	0.256637
CD79A	0.256098									CD79A
ZFP36L2	0.254237		ZFP36L2		ZFP36L2			ZFP36L2	ZFP36L2
CDC73	0.252381	CDC73	CDC73		CDC73					CDC73
TP53	0.252232	TP53	TP53	TP53	TP53		TP53	TP53	TP53	TP53
ZNF750	0.25			ZNF750				ZNF750	ZNF750		ZNF750
SMARCD2_ENST00000323347	0.25
ZRSR2	0.25									ZRSR2
NSUN6	0.25
C22orf28	0.25
SLC23A2	0.248322				SLC23A2
PLEKHA6	0.248201				PLEKHA6		PLEKHA6
TSC1	0.248193	TSC1		TSC1	TSC1			TSC1	TSC1	TSC1
C16orf88	0.247525
CERK	0.247423				CERK
MSH3	0.247423								MSH3
SEC31A_ENST00000395310	0.246305
HNRNPL	0.245902				HNRNPL
TP53_ENST00000269305	0.245887
RTN4_ENST00000337526	0.245509
MAP3K1_ENST00000399503	0.244851
MSH3_ENST00000265081	0.244565
WT1_ENST00000379079	0.24424
RBM27	0.243243				RBM27
HNF1A	0.243243	HNF1A			HNF1A					HNF1A
SEC63	0.243056				SEC63
MGA	0.24234			MGA	MGA			MGA	MGA		MGA
CPEB2_ENST00000538197	0.242236
DHX16	0.241573				DHX16
PIGB	0.240964
SMAD2_ENST00000591214	0.238372
NBN	0.238318									NBN
AASDH_ENST00000502617	0.238095
TFE3_ENST00000336239	0.238095
RFX5	0.236641				RFX5
STAU2_ENST00000521210	0.236364
DYRK1A_ENST00000338785	0.236364
PDS5B	0.23622				PDS5B				PDS5B
CCDC73	0.236111				CCDC73
FBXW7_ENST00000281708	0.236052
ATM_ENST00000278616	0.234117
PSIP1_ENST00000380733	0.233333
DHX16_ENST00000376442	0.232432
RNF6	0.232
YLPM1	0.231844				YLPM1			YLPM1
SLC16A1	0.231707				SLC16A1
CCDC66_ENST00000436465	0.231579
HMMR	0.231405					HMMR
POLM	0.230769
HIAT1	0.230769
ZFP37	0.230769
FBXW7	0.230352	FBXW7	FBXW7	FBXW7	FBXW7		FBXW7	FBXW7	FBXW7	FBXW7
ATM	0.228656	ATM	ATM	ATM	ATM		ATM	ATM	ATM	ATM
NCOR1_ENST00000436828	0.228571
OPTN	0.228261				OPTN
CLOCK	0.227941				CLOCK
PDCD1	0.227273
ZDHHC8_ENST00000405930	0.227273
FBXW7_NM_018315_2	0.22602
FBXW7_ENST00000296555	0.225882
GIGYF2	0.225296				GIGYF2
BCOR	0.225	BCOR	BCOR	BCOR	BCOR	BCOR		BCOR	BCOR	BCOR
KCTD3	0.225
MAP2K4	0.224719		MAP2K4	MAP2K4	MAP2K4			MAP2K4	MAP2K4	MAP2K4
PNISR	0.224638				PNISR
TNPO1	0.224638				TNPO1
CSNK2A1	0.22449				CSNK2A1	CSNK2A1	CSNK2A1				CSNK2A1
EPB41L5_ENST00000443124	0.223529
ING1_ENST00000338450	0.223404
GUF1	0.223214
TP53_ENST00000413465	0.222588
DDX27	0.221622
STAU2	0.221311				STAU2
SERPINB10	0.221154
SENP6	0.220859				SENP6
PTCH1_ENST00000331920	0.22028
OR6C75	0.22
SLC22A4	0.22
EIF2AK1	0.218978				EIF2AK1
TRAM1L1	0.218487
MTF2	0.217391				MTF2	MTF2
YLPM1_ENST00000325680	0.216867
SMAP1	0.216867				SMAP1
WT1_ENST00000332351	0.216028
FBXW7_ENST00000534231	0.215548
LUC7L2	0.215054				LUC7L2
AASDH	0.213836
PUS7	0.213115
CTNND1	0.212766		CTNND1		CTNND1		CTNND1		CTNND1	CTNND1
OFD1	0.212435				OFD1
WDR47	0.212329				WDR47
LUC7L2_ENST00000541170	0.211765
ANTXR2	0.211009				ANTXR2
STAU2_ENST00000524300	0.210938
C9orf131	0.210811				C9orf131
FETUB	0.209677
AGBL3	0.209524				AGBL3
AGBL3_ENST00000458078	0.208333
GIGYF2_ENST00000409451	0.208333
SCAF4	0.208178				SCAF4				SCAF4
CCDC41	0.207921
NEK1_ENST00000507142	0.20765
MCPH1_ENST00000344683	0.207547
CTNND1_ENST00000399050	0.207447
ZC3H13	0.206989				ZC3H13		ZC3H13
IFT57	0.206897				IFT57
SMC6	0.206897				SMC6
RUFY2	0.206522				RUFY2
KLF3	0.206522				KLF3
ACVR1B_ENST00000541224	0.206186
TTLL10	0.206186				TTLL10
PTCH1_ENST00000430669	0.206081
AXIN2	0.205714		AXIN2	AXIN2					AXIN2	AXIN2
NCOR1	0.205382	NCOR1	NCOR1	NCOR1	NCOR1			NCOR1	NCOR1	NCOR1
PTCH1_ENST00000375274	0.204991
CEP290	0.204969						CEP290
DDX26B	0.204819
OR2J2	0.20438
SCLT1	0.20438
CDC14A	0.203008				CDC14A
RBM6	0.202532				RBM6
JAK1	0.202505	JAK1			JAK1			JAK1	JAK1	JAK1
BRE_ENST00000342045	0.202381
SLC35F5	0.202128				SLC35F5
TGFBR2	0.201571		TGFBR2	TGFBR2	TGFBR2			TGFBR2	TGFBR2	TGFBR2
CDK12	0.201299		CDK12	CDK12	CDK12		CDK12	CDK12	CDK12	CDK12
FAT1	0.200128			FAT1	FAT1			FAT1	FAT1	FAT1	FAT1
ING1	0.2			ING1
NCOR1_ENST00000395851	0.2
MAN1A2	0.2				MAN1A2
FAS	0.2				FAS					FAS
SENP6_ENST00000370014	0.2
C1orf114	0.2
CCT3	0.2				CCT3
NOSTRIN_ENST00000444448	0.2
SLAIN1	0.2
ALX4	0.2
GRK4_ENST00000398052	0.198198
UBQLN2	0.198198
FUBP3	0.198113				FUBP3
HPS6	0.197917				HPS6
BCL9L_ENST00000392849	0.197101
COIL	0.196429				COIL
LATS1_ENST00000392273	0.196347
SENP1_ENST00000448372	0.196262
RBPJ_ENST00000348160	0.196078
CREBBP	0.196078	CREBBP		CREBBP	CREBBP			CREBBP	CREBBP	CREBBP
ADNP	0.195			ADNP	ADNP
ADD3	0.194805				ADD3
FXR1	0.194444				FXR1
ZNF292_ENST00000369577	0.194245
CRTC1	0.194118		CRTC1		CRTC1					CRTC1
MIS18BP1	0.193878				MIS18BP1
TCERG1	0.193833				TCERG1
SLC22A9	0.193548
SPRYD5_ENST00000327733	0.193396
TP53_ENST00000455263	0.193319
FAT	0.192739
RNF111	0.19209				RNF111				RNF111
USP28	0.192						USP28	USP28
LATS1_ENST00000543571	0.191601
NUB1	0.191489				NUB1
PPIG	0.191011
CHEK1	0.19084				CHEK1
RAPGEF6_ENST00000307984	0.190678
TP53_ENST00000420246	0.19066
ASXL2	0.190635				ASXL2			ASXL2	ASXL2	ASXL2
G2E3	0.190083				G2E3
COBLL1	0.189723				COBLL1
MTMR2_ENST00000346299	0.189474
ZNF563	0.188811				ZNF563
TMPO_ENST00000266732	0.188679
ZNF292	0.188586				ZNF292	ZNF292
CDH26	0.188525
OXSM	0.188235
MAP7D1	0.188235				MAP7D1
ZDHHC7_ENST00000564466	0.188235
RBBP5	0.188119				RBBP5
SLFN12	0.188034
ZNF365	0.1875
CRTC1_ENST00000338797	0.187135
SENP6_ENST00000447266	0.187097
MFRP	0.186992				MFRP
FAM82A1	0.186813
FXR2	0.186275				FXR2
Q99543-2	0.186275
KBTBD4	0.186275				KBTBD4
SASS6	0.186275				SASS6
MLL4	0.186257
LUC7L2_ENST00000263545	0.186047
PTPN2	0.186047				PTPN2
PHTF1	0.186047				PHTF1		PHTF1
GRLF1_ENST00000317082	0.185629
RBM46	0.185629
MRE11A_ENST00000323929	0.18552
NAA15	0.185484				NAA15
C18orf34_ENST00000383096	0.18543
RNF111_ENST00000434298	0.184971
C18orf34	0.184669
CASP5_ENST00000393141	0.184397
MRE11A	0.184332					MRE11A
RAPGEF6_ENST00000509018	0.184314
TNRC6B_ENST00000454349	0.184275
MTMR2	0.183908				MTMR2
RSF1	0.183673				RSF1
LATS1_ENST00000253339	0.183673
TGFBR2_ENST00000359013	0.183616
FCHO2	0.183486				FCHO2
DLAT	0.183486				DLAT
BCOR_ENST00000378463	0.183333
CHUK	0.183206				CHUK
GRB14	0.183099
TP53_ENST00000545858	0.182847
SAFB2	0.182796				SAFB2
CCND3	0.182692				CCND3					CCND3
DNAJC2	0.182692				DNAJC2
DDX17_ENST00000381633	0.182482
USP35_ENST00000263311	0.182266
BCL9L	0.182058				BCL9L					BCL9L
KDM5C	0.182	KDM5C	KDM5C	KDM5C	KDM5C			KDM5C	KDM5C	KDM5C
DAXX	0.181818	DAXX								DAXX
C14orf39	0.181818				C14orf39
KLHDC5	0.181818
ARL13B_ENST00000394222	0.181818
BCOR_ENST00000378444	0.181356
C2orf67	0.18125
ARID1B	0.180807	ARID1B			ARID1B			ARID1B		ARID1B
KIAA1267	0.180672
JPH4	0.180645
RBPJ	0.18018				RBPJ
UPF3A	0.18018							UPF3A
TRIM22	0.18
ICA1	0.179856				ICA1
GRLF1	0.179811
CTLA4	0.179775				CTLA4
XPOT	0.179724				XPOT
CNTN6	0.179537
CDC14A_ENST00000361544	0.179487
ASXL2_ENST00000435504	0.179431
BCORL1	0.179138				BCORL1					BCORL1
RAD54B	0.179104				RAD54B
BRE	0.178947
CCDC82	0.178947
FAR2	0.178862				FAR2
HELLS	0.178571				HELLS
CWF19L2_ENST00000282251	0.178344
USP43	0.178261
EXOSC9	0.178218
SPATA17	0.177966
ATG14	0.177778				ATG14
DYNC1LI1	0.177778				DYNC1LI1
APPL1	0.177419				APPL1
EPB41L5	0.176923				EPB41L5
SPTY2D1	0.176056
ZC3H13_ENST00000242848	0.175824
ACBD3	0.175824				ACBD3
EP300	0.175789	EP300	EP300	EP300	EP300			EP300	EP300	EP300
C10orf68	0.175676
TNRC6B_ENST00000301923	0.175
CLCN3	0.175				CLCN3
COLQ_ENST00000435459	0.174419
SIN3A	0.173611		SIN3A		SIN3A				SIN3A		SIN3A
SPECC1_ENST00000261503	0.173554
ERRFI1	0.173554				ERRFI1
TMEM232_ENST00000455884	0.173469
ATP11B	0.173333				ATP11B
NIPBL	0.172932				NIPBL			NIPBL	NIPBL
CFI	0.17284				CFI
TEX11	0.172619				TEX11
ZMYM3	0.172414				ZMYM3			ZMYM3	ZMYM3	ZMYM3
PLK2	0.172414
SBNO1	0.172414				SBNO1						SBNO1
ATAD2	0.172297				ATAD2	ATAD2	ATAD2
TCHP	0.172043						TCHP
IL2RG	0.172043
IL2RG_ENST00000374202	0.172043
CEP95_ENST00000556440	0.171875
PIK3R3_ENST00000540385	0.171717
C15orf33	0.171429
WDR47_ENST00000400794	0.171429
ZNF880	0.171429
RUNX1	0.171171	RUNX1	RUNX1	RUNX1	RUNX1			RUNX1	RUNX1	RUNX1
KDM5C_ENST00000452825	0.171149
DDX17	0.171053				DDX17						DDX17
DNA2	0.170886
ROCK2	0.170732				ROCK2
DDX26B_ENST00000370752	0.170455
NOTCH1	0.170313	NOTCH1	NOTCH1	NOTCH1	NOTCH1			NOTCH1	NOTCH1	NOTCH1
DOCK3	0.169877				DOCK3
CEP135	0.169492						CEP135
ASTE1	0.169355
UBR5	0.169231				UBR5					UBR5
GLTSCR1	0.168966
AP2A2	0.168605				AP2A2
CPA6_ENST00000518549	0.168539
BTBD7_ENST00000298896	0.168421
HTR1F	0.168317
ZNF548_ENST00000336128	0.168224
PAX2_ENST00000428433	0.168224
ANO10	0.168				ANO10
RNF103	0.167939				RNF103
SAMSN1_ENST00000285670	0.167883
CDK8	0.16763				CDK8
SMC5	0.167568				SMC5		SMC5
RINT1	0.166667
AAAS	0.166667				AAAS
KIAA1586	0.166667
DOCK3_ENST00000266037	0.166667
HMGXB4	0.166667		HMGXB4		HMGXB4
TBC1D10C	0.165414				TBC1D10C
CEP95	0.165414				CEP95
SLC44A3_ENST00000271227	0.165289
RAD21	0.165254		RAD21	RAD21	RAD21				RAD21	RAD21
RTKN2_ENST00000395265	0.165049
UPF3B	0.165049						UPF3B
CDCA7L	0.164948
CYLD_ENST00000427738	0.164835
SP140_ENST00000392045	0.164751
TGFBR1	0.164659				TGFBR1
NOTCH1_ENST00000277541	0.164067
ARID1B_ENST00000346085	0.164051
MCHR2	0.164021
ZNRF3	0.163934				ZNRF3			ZNRF3		ZNRF3
AHCTF1_ENST00000326225	0.162602
LRRFIP2	0.162162				LRRFIP2
OR2Y1	0.161905
ARHGAP35	0.16041		ARHGAP35	ARHGAP35	ARHGAP35			ARHGAP35	ARHGAP35
FTSJD1	0.160305
ACAP2	0.16				ACAP2
PRMT3	0.159091				PRMT3
USP9X_ENST00000324545	0.15869
BIRC3	0.158537				BIRC3					BIRC3
PKD2	0.158228				PKD2
BRCA2	0.158103	BRCA2	BRCA2		BRCA2				BRCA2	BRCA2
LUZP1	0.157895				LUZP1
ZNF323	0.157303
COLQ_ENST00000383781	0.157303
TRIM17_ENST00000456946	0.157303
PIK3R3	0.157143				PIK3R3
ZFP37_ENST00000553380	0.156463
OR9A4	0.155689
TRDN	0.15534				TRDN
MCM6	0.15493				MCM6	MCM6
RSRC2	0.154639				RSRC2
KLRAQ1	0.153846
NAPRT1_ENST00000449291	0.153846
MPP5	0.153846				MPP5
GNPTAB	0.153439			GNPTAB	GNPTAB
SMARCD1	0.153153				SMARCD1					SMARCD1
USP9X	0.152913				USP9X				USP9X
GSK3B_ENST00000316626	0.152174
ZNF23	0.151515
FBXW7_ENST00000393956	0.151282
PPP1R21	0.150794
MAX_ENST00000556979	0.150538
FGD4	0.150376				FGD4
CCDC14_ENST00000488653	0.150327
NOTCH2	0.150224	NOTCH2			NOTCH2				NOTCH2	NOTCH2
EFHA2	0.15
ODF2L_ENST00000294678	0.149425
ING1_ENST00000375774	0.149254
COLQ	0.148936				COLQ
SAMSN1	0.147887				SAMSN1
ZNRF3_ENST00000544604	0.147727
CCDC14	0.147541				CCDC14
MORC4	0.147287			MORC4	MORC4		MORC4
TRIM37	0.147059				TRIM37
CCDC102B_ENST00000584156	0.146853
MAX	0.146341		MAX		MAX		MAX	MAX	MAX	MAX
MYCBP2_ENST00000360084	0.146067
CCAR1	0.145729		CCAR1		CCAR1
TSGA10	0.145349				TSGA10		TSGA10
EDIL3	0.145251				EDIL3
SLC35F1	0.144928				SLC35F1
ZNF491	0.144444
TCEA3	0.144444				TCEA3
ZNF418	0.14433
RAD50	0.144231				RAD50	RAD50
OR7C1	0.144231
MLLT4_ENST00000392108	0.144201
CD93	0.143885
BRCA2_ENST00000544455	0.143878
GCFC1	0.143713
FAM126A	0.142857				FAM126A
CAPZA3	0.142857
MALT1_ENST00000348428	0.142857
CAPN7	0.142857				CAPN7
TCEB3C	0.142857
TNFRSF14_ENST00000355716	0.142857
SLC17A2	0.141975
NGLY1_ENST00000428257	0.141667
OR52N5	0.141593
ZNF136	0.141509
MGAM	0.141509				MGAM
C12orf4	0.141304
PPP6C	0.14094			PPP6C	PPP6C			PPP6C	PPP6C	PPP6C
DYRK1A	0.140845				DYRK1A
MAX_ENST00000284165	0.14
FOXP1	0.139932				FOXP1			FOXP1		FOXP1
ZNF215	0.139394
MCM7	0.139344					MCM7
PRKAR1A	0.139344		PRKAR1A		PRKAR1A			PRKAR1A	PRKAR1A	PRKAR1A
STAT5B	0.139241				STAT5B					STAT5B
USP7	0.13879				USP7
PPP6C_ENST00000451402	0.137931
ZNF853	0.137615
ZNF853_ENST00000457543	0.137615
PHF2	0.1375				PHF2
STIP1	0.137255				STIP1
CLSPN	0.137143				CLSPN
ATF6	0.137097				ATF6
CLSPN_ENST00000251195	0.136905
IL1RAPL1	0.136752				IL1RAPL1
OTX2	0.136691
TARS	0.136364
TNFSF11	0.136364
ODF2L_ENST00000359242	0.136364
IL1RAP_ENST00000443369	0.136
CHRDL1	0.135593				CHRDL1
TCF25_ENST00000263347	0.135417
AHCTF1	0.135359				AHCTF1
CFP	0.135135
UGT2B17	0.135135				UGT2B17
PAN3	0.134752				PAN3
BIN2	0.134228				BIN2
VPS53	0.133929				VPS53
DDO	0.133929
ACTL6B	0.133929				ACTL6B
ATF7IP	0.133829				ATF7IP	ATF7IP			ATF7IP
RNF20	0.133758
IL1RAPL1_ENST00000378993	0.133621
TAOK1_ENST00000261716	0.133333
SLC16A12_ENST00000371790	0.133333
BRCA1	0.1331	BRCA1	BRCA1	BRCA1	BRCA1			BRCA1	BRCA1	BRCA1
PAN3_ENST00000380958	0.132911
BAIAP2L1	0.132353				BAIAP2L1
RAB11FIP5	0.132353
WRAP53	0.131868				WRAP53
ZNF441	0.131579
TNFRSF11B	0.131579
SMARCA4	0.131244	SMARCA4	SMARCA4	SMARCA4	SMARCA4	SMARCA4		SMARCA4	SMARCA4	SMARCA4
TNRC6B	0.131206				TNRC6B
AGT	0.131034
PMS1	0.130952						PMS1		PMS1	PMS1
STAT2	0.130435				STAT2
CCDC6	0.130435			CCDC6	CCDC6					CCDC6
RAD50_ENST00000265335	0.130312
KDM5A	0.129741				KDM5A					KDM5A
KDM5A_ENST00000399788	0.129741
NXF1	0.128571				NXF1
GOLGA5_ENST00000163416	0.12782
EPYC	0.12766
XRN1	0.12766				XRN1		XRN1
DNAJC11	0.127119				DNAJC11
WAC	0.126667				WAC
PPP2R3B_ENST00000390665	0.126667
TP73	0.126582
NAPRT1_ENST00000276844	0.126316
RARS	0.126126				RARS
TNFRSF11B_ENST00000297350	0.126126
PPP2R3B	0.125828
ACVR1B	0.125749	ACVR1B	ACVR1B	ACVR1B	ACVR1B		ACVR1B	ACVR1B	ACVR1B
