# Supplementary material for: Use of signals of positive and negative selection to distinguish cancer genes and passenger genes
Source: eLife. 2021 Jan 11;10:e59629. doi: 10.7554/eLife.59629 (PMC7877913; doi:10.7554/eLife.59629)
Supplement: Supplementary file 2. [file elife-59629-supp2.xlsx]

## Sheet: CG_SSI2SD_rNSM>0.125
CG_SSI2SD_rNSM> 0.125	indel_rNSM	CG_SO*2SD_rNSM>3	rNSM*
APC	2.97801	APC	39.7256
NF2	1.99095	NF2	26.1589
RB1	1.3531	RB1	22.039
ARID1A	1.16502	ARID1A	20.7656
CDKN2A	0.576159	CDKN2A	20.7281
CCR4	0.79798	CCR4	17.6723
NF2_ENST00000403999	0.795322	NF2_ENST00000403999	12.4132
CCR7	0.41573	CCR7	12.093
STK11	0.530351	STK11	11.4114
PRRT2	0.4	PRRT2	11.1083
CDKN1B	0.830986	CDKN1B	11.0765
AMER1	0.532033	AMER1	10.391
BAP1	0.424528	BAP1	10.3005
RBM10	0.511429	RBM10	9.94052
PBRM1	0.712281	PBRM1	9.11338
PPM1D	0.58125	PPM1D	8.75114
NF1	0.501783	NF1	8.55956
ASXL1	0.451429	ASXL1	8.23786
HLA-A_ENST00000376806	0.390476	HLA-A_ENST00000376806	8.14646
PBRM1_ENST00000296302	0.622924	PBRM1_ENST00000296302	7.99257
ZNF276	0.305556	ZNF276	7.95831
PBRM1_ENST00000356770	0.623446	PBRM1_ENST00000356770	7.93807
HLA-A	0.488	HLA-A	7.87877
AXIN1	0.380615	AXIN1	7.86088
CDH1	0.377282	CDH1	7.81032
PTEN	0.584406	PTEN	7.72473
SOX9	0.426009	SOX9	7.72284
TGIF1	0.263736	TGIF1	7.59101
TET2	0.647436	TET2	7.34427
ARID2	0.467049	ARID2	7.11866
ASXL1_ENST00000306058	0.387368	ASXL1_ENST00000306058	7.09469
DUSP16	0.333333	DUSP16	6.94123
CDKN1A	0.295238	CDKN1A	6.89055
KDM6A	0.427549	KDM6A	6.85983
MEN1	0.511706	MEN1	6.69393
RNF43	0.922865	RNF43	6.62437
B3GALT1	0.316239	B3GALT1	6.48797
PHF6	0.495413	PHF6	6.40649
KMT2D	0.351109	KMT2D	6.3996
CDKN1A_ENST00000448526	0.27551	CDKN1A_ENST00000448526	6.39836
ZNF750	0.25	ZNF750	6.29345
SMAD2	0.37931	SMAD2	6.17452
WT1	0.319749	WT1	6.16439
VHL	0.655172	VHL	6.10354
TET2_ENST00000305737	0.626911	TET2_ENST00000305737	6.09675
SETD2	0.39628	SETD2	6.0648
KDM6A_ENST00000382899	0.354776	KDM6A_ENST00000382899	6.02321
B2M	0.483871	B2M	6.02054
SMARCD2	0.271739	SMARCD2	5.87873
TSC1_ENST00000403810	0.256637	TSC1_ENST00000403810	5.8691
SMARCB1	0.427928	SMARCB1	5.77476
CASP8	0.366972	CASP8	5.77144
ING1_ENST00000338450	0.223404	ING1_ENST00000338450	5.72497
STAG2	0.360558	STAG2	5.6669
BRD7	0.320611	BRD7	5.53889
CASP8_ENST00000264275	0.363946	CASP8_ENST00000264275	5.43573
SMARCD2_ENST00000323347	0.25	SMARCD2_ENST00000323347	5.34935
SLC16A1	0.231707	SLC16A1	5.2504
SMAD4	0.286486	SMAD4	5.21879
RASA1	0.271642	RASA1	5.2075
TP53	0.252232	TP53	5.07608
PIK3R1	0.336111	PIK3R1	4.98116
CBFB_ENST00000290858	0.292135	CBFB_ENST00000290858	4.93911
MLH1	0.305556	MLH1	4.91586
PTCH1	0.307692	PTCH1	4.89074
RASA1_ENST00000456692	0.289562	RASA1_ENST00000456692	4.87995
B2M_ENST00000544417	0.383459	B2M_ENST00000544417	4.87268
ING1	0.2	ING1	4.74265
TSC1	0.248193	TSC1	4.64645
WT1_ENST00000379079	0.24424	WT1_ENST00000379079	4.616
PIK3R1_ENST00000336483	0.341085	PIK3R1_ENST00000336483	4.6115
CTCF	0.330049	CTCF	4.59562
MAP2K4	0.224719	MAP2K4	4.58457
PIK3R1_ENST00000320694	0.34375	PIK3R1_ENST00000320694	4.55996
NOTCH1	0.170313	NOTCH1	4.46915
DYRK1A_ENST00000338785	0.236364	DYRK1A_ENST00000338785	4.41271
TCF7L2_ENST00000352065	0.261905	TCF7L2_ENST00000352065	4.38121
FAT1	0.200128	FAT1	4.37229
ZNRF3	0.163934	ZNRF3	4.37058
KMT2C	0.280138	KMT2C	4.33243
MGA	0.24234	MGA	4.29607
CCND3	0.182692	CCND3	4.26935
TCF7L2_ENST00000355717	0.481633	TCF7L2_ENST00000355717	4.24808
USP43	0.178261	USP43	4.23147
BCOR	0.225	BCOR	4.20872
ACVR2A	1.34197	ACVR2A	4.17867
SMAD2_ENST00000591214	0.238372	SMAD2_ENST00000591214	4.17491
HLA-B	0.283019	HLA-B	4.15423
MSH2	0.33574	MSH2	4.14416
TP53_ENST00000420246	0.19066	TP53_ENST00000420246	4.12177
LUC7L2	0.215054	LUC7L2	4.06969
TP53_ENST00000455263	0.193319	TP53_ENST00000455263	4.06208
TP53_ENST00000413465	0.222588	TP53_ENST00000413465	4.05732
CSNK2A1	0.22449	CSNK2A1	4.01134
SPRED1	0.302326	SPRED1	3.94999
RUNX1	0.171171	RUNX1	3.94148
ATRX	0.285564	ATRX	3.92932
CYLD	0.295082	CYLD	3.90646
USP45	0.258929	USP45	3.86825
BMPR2	0.536946	BMPR2	3.72899
CTNND1	0.212766	CTNND1	3.7191
TCF7L2_ENST00000543371	0.325806	TCF7L2_ENST00000543371	3.66973
TCF7L2	0.337979	TCF7L2	3.64157
TGFBR2	0.201571	TGFBR2	3.63815
COLQ	0.148936	COLQ	3.63075
COLQ_ENST00000383781	0.157303	COLQ_ENST00000383781	3.62403
NCOR1_ENST00000395851	0.2	NCOR1_ENST00000395851	3.58272
NSUN6	0.25	NSUN6	3.52393
FBXW7_ENST00000296555	0.225882	FBXW7_ENST00000296555	3.50393
AGBL3	0.209524	AGBL3	3.49025
ASXL2	0.190635	ASXL2	3.47689
RBM46	0.185629	RBM46	3.45146
LUC7L2_ENST00000541170	0.211765	LUC7L2_ENST00000541170	3.45101
LUC7L2_ENST00000263545	0.186047	LUC7L2_ENST00000263545	3.41088
NCOR1	0.205382	NCOR1	3.37025
ZFP36L2	0.254237	ZFP36L2	3.36925
ARHGAP35	0.16041	ARHGAP35	3.34263
LMAN1	0.428571	LMAN1	3.32927
PAN3	0.134752	PAN3	3.32587
ARID1B	0.180807	ARID1B	3.31055
FBXW7_ENST00000281708	0.236052	FBXW7_ENST00000281708	3.30321
DAXX	0.181818	DAXX	3.29169
IFT57	0.206897	IFT57	3.28381
CDK12	0.201299	CDK12	3.2709
FBXW7	0.230352	FBXW7	3.25901
EPYC	0.12766	EPYC	3.24906
CDCA7L	0.164948	CDCA7L	3.2456
BCOR_ENST00000378463	0.183333	BCOR_ENST00000378463	3.22592
SLC27A3	0.264151	SLC27A3	3.22207
FUBP1_ENST00000370767	0.288043	FUBP1_ENST00000370767	3.22031
TCEA3	0.144444	TCEA3	3.19426
MTMR2	0.183908	MTMR2	3.19047
ASXL2_ENST00000435504	0.179431	ASXL2_ENST00000435504	3.17101
ZNF14	0.267606	ZNF14	3.16648
TGFBR1	0.164659	TGFBR1	3.15321
CREBBP	0.196078	CREBBP	3.14772
KDM5C	0.182	KDM5C	3.14704
ATP6V1B1	0.290323	ATP6V1B1	3.1355
LATS1_ENST00000392273	0.196347	LATS1_ENST00000392273	3.12705
NOTCH2	0.150224	NOTCH2	3.11762
ATM	0.228656	ATM	3.10375
KDM5C_ENST00000452825	0.171149	KDM5C_ENST00000452825	3.06503
CDC7	0.352273	CDC7	3.06495
IWS1	0.277778	IWS1	3.0579
RAD21	0.165254	RAD21	3.05458
TRIM22	0.18	TRIM22	3.03721
RNF6	0.232	RNF6	3.0245
FAS	0.2	FAS	3.021
CEBPA	0.352941	CEBPA	3.01781
CDC73	0.252381	CDC73	3.00302
YLPM1	0.231844
NAA15	0.185484
TNRC6B_ENST00000301923	0.175
CDK8	0.16763
PPP6C	0.14094
LATS1_ENST00000253339	0.183673
UPF3B	0.165049
FBXW7_ENST00000393956	0.151282
EP300	0.175789
PDCD1	0.227273
SMARCA4	0.131244
MAX	0.146341
MAX_ENST00000556979	0.150538
WAC	0.126667
ACVR1B	0.125749
MAX_ENST00000284165	0.14
PLK2	0.172414
JAK1	0.202505
BIRC3	0.158537
PIK3R3	0.157143
KDM5A	0.129741
BTBD7_ENST00000298896	0.168421
TRDN	0.15534
ZNF880	0.171429
RAD50	0.144231
OTX2	0.136691
		SF3B4	4.15487
		SLC16A8	4.05443
		ELF4	3.50684
		TSC2	3.40191
		SH2B1_ENST00000359285	3.30525
		GATA3	3.30211
		GGT7	3.26535
		RIC8A	3.22297
		WNT10B	3.16085
		LHX3	3.12462
		ELL	3.09835
		COBL	3.04184
		AMBRA1	3.03088
		GFI1	3.00655
RPL22	2.84375
RB1_ENST00000267163	1.21407
AKAP7	0.825397
CDKN2A_ENST00000446177	0.64346
QKI_ENST00000275262	0.614458
CDKN2A_ENST00000498124	0.613924
STK11_ENST00000326873	0.487179
STAMBPL1	0.464286
WNT16	0.461538
STAMBPL1_ENST00000371927	0.45977
PHF6_ENST00000332070	0.450549
XYLT2	0.44375
ZNF233	0.431193
QKI_ENST00000392127	0.416667
QKI_ENST00000453779	0.416667
FAM123B_ENST00000330258	0.416092
MXRA8	0.41573
NF1_ENST00000444181	0.409396
MVK	0.406977
NF1_ENST00000358273	0.402927
LARP4B	0.402439
SETD2_ENST00000409792	0.398734
QKI	0.380435
TTK	0.371429
MSH6	0.366162
WNT16_ENST00000361301	0.363636
CASP8_ENST00000358485	0.358025
KDM6A_ENST00000377967	0.352601
RNF128_ENST00000324342	0.342593
MLL2_ENST00000301067	0.342342
TAF1B	0.336842
STAG2_ENST00000218089	0.330544
PHACTR4	0.330508
CCDC28A	0.329787
C14orf43	0.328283
ESRP1	0.327778
RTKN2	0.322581
FUBP1_ENST00000370768	0.321053
RBM45	0.315217
CCDC66_ENST00000394672	0.313725
DAZAP1	0.313725
TMPO	0.307692
TM9SF3	0.306818
TTK_ENST00000369798	0.304094
ZC3H18	0.303483
CBFB_ENST00000412916	0.302083
SMAD4_ENST00000452201	0.3
DHX16_ENST00000376437	0.298851
TP53_ENST00000414315	0.296344
DYNC1I2	0.294737
CPEB2	0.293233
CKAP2	0.292929
CCDC66	0.291667
OLAH	0.291139
TCEB3	0.289062
SEC31A_ENST00000432794	0.288462
FUBP1_ENST00000436586	0.287234
ZNF276_ENST00000443381	0.286957
PAX6	0.285714
MBD6	0.284946
LARP7	0.284211
HNRPL	0.283019
RDBP	0.282353
ZDHHC8	0.28022
SCLT1_ENST00000281142	0.277372
ATRX_ENST00000373344	0.276619
EIF2AK1_ENST00000536084	0.27619
ARFGAP3	0.275
ESRP1_ENST00000433389	0.272727
TAP2_ENST00000374897	0.272727
MLL3_ENST00000355193	0.272464
TEAD2	0.27193
SLC3A2	0.269231
GIGYF2_ENST00000452341	0.267717
AIM2	0.26
TBC1D23_ENST00000394144	0.258929
CENPC1	0.257812
CD79A	0.256098
C22orf28	0.25
ZRSR2	0.25
SLC23A2	0.248322
PLEKHA6	0.248201
C16orf88	0.247525
CERK	0.247423
MSH3	0.247423
SEC31A_ENST00000395310	0.246305
HNRNPL	0.245902
TP53_ENST00000269305	0.245887
RTN4_ENST00000337526	0.245509
MAP3K1_ENST00000399503	0.244851
MSH3_ENST00000265081	0.244565
HNF1A	0.243243
RBM27	0.243243
SEC63	0.243056
CPEB2_ENST00000538197	0.242236
DHX16	0.241573
PIGB	0.240964
NBN	0.238318
AASDH_ENST00000502617	0.238095
TFE3_ENST00000336239	0.238095
RFX5	0.236641
STAU2_ENST00000521210	0.236364
PDS5B	0.23622
CCDC73	0.236111
ATM_ENST00000278616	0.234117
PSIP1_ENST00000380733	0.233333
DHX16_ENST00000376442	0.232432
CCDC66_ENST00000436465	0.231579
HMMR	0.231405
HIAT1	0.230769
POLM	0.230769
ZFP37	0.230769
NCOR1_ENST00000436828	0.228571
OPTN	0.228261
CLOCK	0.227941
ZDHHC8_ENST00000405930	0.227273
FBXW7_NM_018315_2	0.22602
GIGYF2	0.225296
KCTD3	0.225
PNISR	0.224638
TNPO1	0.224638
EPB41L5_ENST00000443124	0.223529
GUF1	0.223214
DDX27	0.221622
STAU2	0.221311
SERPINB10	0.221154
SENP6	0.220859
PTCH1_ENST00000331920	0.22028
OR6C75	0.22
SLC22A4	0.22
EIF2AK1	0.218978
TRAM1L1	0.218487
MTF2	0.217391
YLPM1_ENST00000325680	0.216867
SMAP1	0.216867
WT1_ENST00000332351	0.216028
FBXW7_ENST00000534231	0.215548
AASDH	0.213836
PUS7	0.213115
OFD1	0.212435
WDR47	0.212329
ANTXR2	0.211009
STAU2_ENST00000524300	0.210938
C9orf131	0.210811
FETUB	0.209677
AGBL3_ENST00000458078	0.208333
GIGYF2_ENST00000409451	0.208333
SCAF4	0.208178
CCDC41	0.207921
NEK1_ENST00000507142	0.20765
MCPH1_ENST00000344683	0.207547
CTNND1_ENST00000399050	0.207447
ZC3H13	0.206989
SMC6	0.206897
KLF3	0.206522
RUFY2	0.206522
ACVR1B_ENST00000541224	0.206186
TTLL10	0.206186
PTCH1_ENST00000430669	0.206081
AXIN2	0.205714
PTCH1_ENST00000375274	0.204991
CEP290	0.204969
DDX26B	0.204819
OR2J2	0.20438
SCLT1	0.20438
CDC14A	0.203008
RBM6	0.202532
BRE_ENST00000342045	0.202381
SLC35F5	0.202128
MAN1A2	0.2
C1orf114	0.2
CCT3	0.2
NOSTRIN_ENST00000444448	0.2
SENP6_ENST00000370014	0.2
SLAIN1	0.2
ALX4	0.2
GRK4_ENST00000398052	0.198198
UBQLN2	0.198198
FUBP3	0.198113
HPS6	0.197917
BCL9L_ENST00000392849	0.197101
COIL	0.196429
SENP1_ENST00000448372	0.196262
RBPJ_ENST00000348160	0.196078
ADNP	0.195
ADD3	0.194805
FXR1	0.194444
ZNF292_ENST00000369577	0.194245
CRTC1	0.194118
MIS18BP1	0.193878
TCERG1	0.193833
SLC22A9	0.193548
SPRYD5_ENST00000327733	0.193396
FAT	0.192739
RNF111	0.19209
USP28	0.192
LATS1_ENST00000543571	0.191601
NUB1	0.191489
PPIG	0.191011
CHEK1	0.19084
RAPGEF6_ENST00000307984	0.190678
G2E3	0.190083
COBLL1	0.189723
MTMR2_ENST00000346299	0.189474
ZNF563	0.188811
TMPO_ENST00000266732	0.188679
ZNF292	0.188586
CDH26	0.188525
OXSM	0.188235
MAP7D1	0.188235
ZDHHC7_ENST00000564466	0.188235
RBBP5	0.188119
SLFN12	0.188034
ZNF365	0.1875
CRTC1_ENST00000338797	0.187135
SENP6_ENST00000447266	0.187097
MFRP	0.186992
FAM82A1	0.186813
FXR2	0.186275
KBTBD4	0.186275
Q99543-2	0.186275
SASS6	0.186275
MLL4	0.186257
PHTF1	0.186047
PTPN2	0.186047
GRLF1_ENST00000317082	0.185629
MRE11A_ENST00000323929	0.18552
C18orf34_ENST00000383096	0.18543
RNF111_ENST00000434298	0.184971
C18orf34	0.184669
CASP5_ENST00000393141	0.184397
MRE11A	0.184332
RAPGEF6_ENST00000509018	0.184314
TNRC6B_ENST00000454349	0.184275
RSF1	0.183673
TGFBR2_ENST00000359013	0.183616
DLAT	0.183486
FCHO2	0.183486
CHUK	0.183206
GRB14	0.183099
TP53_ENST00000545858	0.182847
SAFB2	0.182796
DNAJC2	0.182692
DDX17_ENST00000381633	0.182482
USP35_ENST00000263311	0.182266
BCL9L	0.182058
ARL13B_ENST00000394222	0.181818
C14orf39	0.181818
KLHDC5	0.181818
BCOR_ENST00000378444	0.181356
C2orf67	0.18125
KIAA1267	0.180672
JPH4	0.180645
RBPJ	0.18018
UPF3A	0.18018
ICA1	0.179856
GRLF1	0.179811
CTLA4	0.179775
XPOT	0.179724
CNTN6	0.179537
CDC14A_ENST00000361544	0.179487
BCORL1	0.179138
RAD54B	0.179104
BRE	0.178947
CCDC82	0.178947
FAR2	0.178862
HELLS	0.178571
CWF19L2_ENST00000282251	0.178344
EXOSC9	0.178218
SPATA17	0.177966
ATG14	0.177778
DYNC1LI1	0.177778
APPL1	0.177419
EPB41L5	0.176923
SPTY2D1	0.176056
ACBD3	0.175824
ZC3H13_ENST00000242848	0.175824
C10orf68	0.175676
CLCN3	0.175
COLQ_ENST00000435459	0.174419
SIN3A	0.173611
SPECC1_ENST00000261503	0.173554
ERRFI1	0.173554
TMEM232_ENST00000455884	0.173469
ATP11B	0.173333
NIPBL	0.172932
CFI	0.17284
TEX11	0.172619
SBNO1	0.172414
ZMYM3	0.172414
ATAD2	0.172297
TCHP	0.172043
IL2RG	0.172043
IL2RG_ENST00000374202	0.172043
CEP95_ENST00000556440	0.171875
PIK3R3_ENST00000540385	0.171717
C15orf33	0.171429
WDR47_ENST00000400794	0.171429
DDX17	0.171053
DNA2	0.170886
ROCK2	0.170732
DDX26B_ENST00000370752	0.170455
DOCK3	0.169877
CEP135	0.169492
ASTE1	0.169355
UBR5	0.169231
GLTSCR1	0.168966
AP2A2	0.168605
CPA6_ENST00000518549	0.168539
HTR1F	0.168317
ZNF548_ENST00000336128	0.168224
PAX2_ENST00000428433	0.168224
ANO10	0.168
RNF103	0.167939
SAMSN1_ENST00000285670	0.167883
SMC5	0.167568
RINT1	0.166667
AAAS	0.166667
DOCK3_ENST00000266037	0.166667
HMGXB4	0.166667
KIAA1586	0.166667
TBC1D10C	0.165414
CEP95	0.165414
SLC44A3_ENST00000271227	0.165289
RTKN2_ENST00000395265	0.165049
CYLD_ENST00000427738	0.164835
SP140_ENST00000392045	0.164751
NOTCH1_ENST00000277541	0.164067
ARID1B_ENST00000346085	0.164051
MCHR2	0.164021
AHCTF1_ENST00000326225	0.162602
LRRFIP2	0.162162
OR2Y1	0.161905
FTSJD1	0.160305
ACAP2	0.16
PRMT3	0.159091
USP9X_ENST00000324545	0.15869
PKD2	0.158228
BRCA2	0.158103
LUZP1	0.157895
TRIM17_ENST00000456946	0.157303
ZNF323	0.157303
ZFP37_ENST00000553380	0.156463
OR9A4	0.155689
MCM6	0.15493
RSRC2	0.154639
KLRAQ1	0.153846
NAPRT1_ENST00000449291	0.153846
MPP5	0.153846
GNPTAB	0.153439
SMARCD1	0.153153
USP9X	0.152913
GSK3B_ENST00000316626	0.152174
ZNF23	0.151515
PPP1R21	0.150794
FGD4	0.150376
CCDC14_ENST00000488653	0.150327
EFHA2	0.15
ODF2L_ENST00000294678	0.149425
ING1_ENST00000375774	0.149254
SAMSN1	0.147887
ZNRF3_ENST00000544604	0.147727
CCDC14	0.147541
MORC4	0.147287
TRIM37	0.147059
CCDC102B_ENST00000584156	0.146853
MYCBP2_ENST00000360084	0.146067
CCAR1	0.145729
TSGA10	0.145349
EDIL3	0.145251
SLC35F1	0.144928
ZNF491	0.144444
ZNF418	0.14433
OR7C1	0.144231
MLLT4_ENST00000392108	0.144201
CD93	0.143885
BRCA2_ENST00000544455	0.143878
GCFC1	0.143713
CAPN7	0.142857
CAPZA3	0.142857
FAM126A	0.142857
MALT1_ENST00000348428	0.142857
TCEB3C	0.142857
TNFRSF14_ENST00000355716	0.142857
SLC17A2	0.141975
NGLY1_ENST00000428257	0.141667
OR52N5	0.141593
MGAM	0.141509
ZNF136	0.141509
C12orf4	0.141304
DYRK1A	0.140845
FOXP1	0.139932
ZNF215	0.139394
MCM7	0.139344
PRKAR1A	0.139344
STAT5B	0.139241
USP7	0.13879
PPP6C_ENST00000451402	0.137931
ZNF853	0.137615
ZNF853_ENST00000457543	0.137615
PHF2	0.1375
STIP1	0.137255
CLSPN	0.137143
ATF6	0.137097
CLSPN_ENST00000251195	0.136905
IL1RAPL1	0.136752
ODF2L_ENST00000359242	0.136364
TARS	0.136364
TNFSF11	0.136364
IL1RAP_ENST00000443369	0.136
CHRDL1	0.135593
TCF25_ENST00000263347	0.135417
AHCTF1	0.135359
CFP	0.135135
UGT2B17	0.135135
BIN2	0.134228
ACTL6B	0.133929
DDO	0.133929
VPS53	0.133929
ATF7IP	0.133829
RNF20	0.133758
IL1RAPL1_ENST00000378993	0.133621
TAOK1_ENST00000261716	0.133333
SLC16A12_ENST00000371790	0.133333
BRCA1	0.1331
PAN3_ENST00000380958	0.132911
BAIAP2L1	0.132353
RAB11FIP5	0.132353
WRAP53	0.131868
TNFRSF11B	0.131579
ZNF441	0.131579
TNRC6B	0.131206
AGT	0.131034
PMS1	0.130952
STAT2	0.130435
CCDC6	0.130435
RAD50_ENST00000265335	0.130312
KDM5A_ENST00000399788	0.129741
NXF1	0.128571
GOLGA5_ENST00000163416	0.12782
XRN1	0.12766
DNAJC11	0.127119
PPP2R3B_ENST00000390665	0.126667
TP73	0.126582
NAPRT1_ENST00000276844	0.126316
RARS	0.126126
TNFRSF11B_ENST00000297350	0.126126
PPP2R3B	0.125828

## Sheet: CG_SO2SD_rMSN>3.00
CG_SO2SD_rMSN>3.00	rMSN	CG_SO*2SD_rMSN>1.50	rMSN*
KRAS	221.104	KRAS	81.9257
IDH1	90.0476	IDH1	39.3877
NRAS	89.5625	NRAS	38.0351
PIK3CA	60.4632	PIK3CA	24.8545
HRAS	48.1333	HRAS	22.9434
BRAF	50.2653	BRAF	22.0467
H3F3A	32.125	H3F3A	14.6544
CTNNB1	34.4648	CTNNB1	14.1394
HRAS_ENST00000397594	25.3571	HRAS_ENST00000397594	11.6801
MYD88	21.1053	MYD88	10.0775
GNAS	16.6585	GNAS	7.65974
JAK2	18.0707	JAK2	7.16178
SPOP	15.92	SPOP	6.97965
SF3B1	17.3182	SF3B1	6.97196
RHOA	16.1111	RHOA	6.93314
IDH2	14.5385	IDH2	6.78985
ERCC2_ENST00000485403	13.1538	ERCC2_ENST00000485403	6.38025
U2AF1	13.6522	U2AF1	6.03984
PRB3	9.71429	PRB3	5.96911
FGFR3	12.9565	FGFR3	5.96781
MED12	12.0129	MED12	5.63297
NFE2L2	14.25	NFE2L2	5.62296
AKT1	12.0513	AKT1	5.61249
SRSF2	12.0476	SRSF2	5.58046
ERBB2_ENST00000541774	11.2979	ERBB2_ENST00000541774	5.26502
KCNJ5	11.3929	KCNJ5	5.15701
EIF1AX	13	EIF1AX	5.12494
FOXL2	10.6522	FOXL2	4.85731
U2AF1_ENST00000380276	10.5417	U2AF1_ENST00000380276	4.66228
EGFR	9.67797	EGFR	4.45439
MAP2K1	9.07407	MAP2K1	4.16689
ERBB2	8.59406	ERBB2	4.00537
RAC1	8.27778	RAC1	3.91651
AR_ENST00000396043	8.48	AR_ENST00000396043	3.83326
ERBB3_ENST00000411731	8.0625	ERBB3_ENST00000411731	3.82415
PTPRS_ENST00000262963	7.85106	PTPRS_ENST00000262963	3.65341
MYCN	7.9375	MYCN	3.55635
KLHL23	8.09091	KLHL23	3.37149
RUNX1_ENST00000344691	7.29412	RUNX1_ENST00000344691	3.3676
PPP2R1A	7.01818	PPP2R1A	3.35782
RARA_ENST00000394081	7.13043	RARA_ENST00000394081	3.32437
KIT	7.648	KIT	3.20054
EGFR_ENST00000342916	7	EGFR_ENST00000342916	3.16848
HIST1H3B	6.3125	HIST1H3B	3.15273
PTPN11	7.36508	PTPN11	3.1038
JAK3_ENST00000534444	6.59375	JAK3_ENST00000534444	3.08676
RECQL4	6.48936	RECQL4	3.05329
ERBB3	6.82692	ERBB3	3.03138
ESR1	6.55882	ESR1	3.02522
RARA	6.44828	RARA	2.9956
TRAF7	6.46341	TRAF7	2.98579
GATA2	6.39024	GATA2	2.91916
GATA1_ENST00000376665	6.17647	GATA1_ENST00000376665	2.91716
SMO	6.04167	SMO	2.90268
YAP1_ENST00000282441	6.65	YAP1_ENST00000282441	2.88874
FGFR2	6.36145	FGFR2	2.81719
FLT3	6.40196	FLT3	2.80754
TROAP	6.03704	TROAP	2.7975
RSL1D1	6.53333	RSL1D1	2.78602
FGFR2_ENST00000369056	6.16667	FGFR2_ENST00000369056	2.75812
FGFR2_ENST00000357555	6.25	FGFR2_ENST00000357555	2.75786
YAP1	6.29412	YAP1	2.73725
HNF1A_ENST00000543427	5.77778	HNF1A_ENST00000543427	2.70734
MED12_ENST00000333646	5.67059	MED12_ENST00000333646	2.65331
STAT5B	5.35897	STAT5B	2.62115
FGFR2_ENST00000351936	5.88732	FGFR2_ENST00000351936	2.59406
TBL1XR1	6.75862	TBL1XR1	2.5896
EZH2	6.29687	EZH2	2.56388
FH	6.25	FH	2.54664
CHEK1	5.85	CHEK1	2.52113
RIT1	5.8125	RIT1	2.49451
MAX_ENST00000556979	5.6875	MAX_ENST00000556979	2.48246
MPL	4.92	MPL	2.47962
FBXW7_ENST00000393956	6.12698	FBXW7_ENST00000393956	2.47894
KEAP1	5.3301	KEAP1	2.47619
MAX_ENST00000284165	5.70588	MAX_ENST00000284165	2.44489
EZH2_ENST00000350995	5.83333	EZH2_ENST00000350995	2.37358
TP53_ENST00000455263	5.23234	TP53_ENST00000455263	2.36813
TP53_ENST00000420246	5.1407	TP53_ENST00000420246	2.29039
TP53_ENST00000413465	5.02953	TP53_ENST00000413465	2.25241
CHEK2	5.05	CHEK2	2.15081
MANEA	5.11765	MANEA	2.13672
NONO	4.72727	NONO	2.10127
MAX	4.6	MAX	2.0965
DNMT3A	4.50327	DNMT3A	2.096
ETV6	4.56364	ETV6	2.05598
PIK3R3	4.77778	PIK3R3	2.05055
TP53	4.55743	TP53	2.04035
CD79B	4.18519	CD79B	2.03552
HNRNPA2B1	4.84211	HNRNPA2B1	2.02229
JAK1	4.33673	JAK1	2.00785
TCF12	4.92308	TCF12	1.96086
TBX3	4.56627	TBX3	1.96012
KDM5A	4.69474	KDM5A	1.95666
ZFP36L2	4.42857	ZFP36L2	1.93489
RAD50	4.68333	RAD50	1.93012
YES1	4.64516	YES1	1.92415
TGFBR2	4.25301	TGFBR2	1.92291
DDX3X	4.64	DDX3X	1.91831
		CIC	1.89405
SMAD3	3.92188	SMAD3	1.8937
TRDN	4.65	TRDN	1.88418
SHQ1	4.25926	SHQ1	1.83968
SUZ12	4.68571	SUZ12	1.80817
ACVR1B	3.94595	ACVR1B	1.78036
SMARCA4	3.81624	SMARCA4	1.77916
LRRD1	4.26316	LRRD1	1.75832
AURKA	3.96875	AURKA	1.73913
BIRC3	4.32353	BIRC3	1.73135
SLC27A3	3.37037	SLC27A3	1.73124
		SMAD3_ENST00000439724	1.68178
PLK2	4	PLK2	1.67574
PDCD1	3.5625	PDCD1	1.66923
FBXW7_ENST00000296555	4.11558	FBXW7_ENST00000296555	1.64809
PPP6C	3.85714	PPP6C	1.64336
EP300	3.75217	EP300	1.62173
FBXW7	4.10345	FBXW7	1.61535
RUNX1	3.47059	RUNX1	1.59023
TGFBR1	3.91525	TGFBR1	1.5779
FBXW7_ENST00000281708	3.95154	FBXW7_ENST00000281708	1.55555
CEBPA	3.58333	CEBPA	1.50352
KDM5C_ENST00000452825	3.14286
KDM5C	3.10072
CDC73	3.46429
CDK8	3.29787
LATS1_ENST00000253339	3.45631
ATM	3.39452
NOTCH2	3.20248
UPF3B	3.28571
SMAD4	3.2
LATS1_ENST00000392273	3.01538
RAD21	3.08955
AASDH_ENST00000502617	3.08824
ABLIM1_ENST00000392952	4.55556
ACCN5	4.53571
ADAM10	4.72
AFP	4.7619
AGAP6	4.55
AGTPBP1_ENST00000376109	4.66667
AIM2	3.54167
ALK	4.62051
ANKRD31_ENST00000274361	4.05556
ANKRD56	5.1
ANO10	3.15625
ANXA10	4.40909
ARHGAP11A	4.75
ATAD2	3.1125
ATM_ENST00000278616	3.33754
ATR	4.11765
AXIN2	4.33333
AXL	4.76543
BARD1	4.92683
BARD1_ENST00000260947	4.875
BCL6	5.03922
BICC1_ENST00000263103	4.57692
BIRC2	4.5
BRCA1	3.96063
BRCA1_ENST00000471181	4.23077
BRCA2	3.82833
BRCA2_ENST00000544455	3.94064
BRE	3.25
BRIP1	5.17188
BRIP1_ENST00000259008	5.12698
BTNL3	4.72
C12orf26	4.41379
C14orf39	3.16327
C18orf34	3.28378
C18orf34_ENST00000383096	3.25641
C2orf67	3.25641
C7orf72	6.28571
C8orf45	4.95652
C9orf131	3.21277
CAPN7	3.1875
CAPS2_ENST00000409445	4.47619
CASD1	4.5625
CASP5_ENST00000393141	3.39394
CCDC35	4.80952
CCND2	4.51852
CCNE1	5.27273
CDC23	5.05263
CDKAL1	4.78947
CENPC1	3.24242
CENPI	4.60714
CEP135	3.03922
CEP290	3.13953
CEP290_ENST00000309041	4.48649
CFHR3	4.67857
CHD1L	5.17857
CHD1L_ENST00000369258	5.77778
CHEK2_ENST00000382580	5.2
CLOCK	3.29412
COBLL1	3.31746
COIL	4.47619
CPEB2	3.02778
CPSF6	4.70833
CPSF6_ENST00000435070	4.70833
CUL3	3.78333
CWF19L2_ENST00000282251	3.11905
CXorf30	4.42857
CXorf30_ENST00000378657	4.46429
CXXC1	5.21429
CYP39A1	4.94118
DDX17	4.67857
DDX17_ENST00000381633	4.95833
DDX4	3.59459
DDX4_ENST00000505374	3.62857
DDX4_ENST00000511853	4
DENND4C	5.17073
DICER1	4.85507
DIS3	5.01923
DLAT	3.86957
DNA2	3.05
DUX4L1	57
EED	4.36
EFHA2	3.28125
EGFR_ENST00000344576	5.11905
EGFR_ENST00000442591	6.325
ENPP4	4.86957
ENSG00000174501	5.37209
EPHA3_ENST00000452448	3.73
ERBB3_ENST00000267101	7.81609
ERBB4	4.33484
ERBB4_ENST00000402597	4.18009
ERCC2_ENST00000391945	6.93182
ERLEC1	4.61111
ERRFI1	4.03846
ETV1	4.86667
EXOC1	4.6
FAM55A	5.85
FANCC_ENST00000289081	4.58065
FBXO11	4.90909
FBXO11_ENST00000403359	4.43243
FBXW7_ENST00000534231	4.48634
FBXW7_NM_018315_2	4.0514
FETUB	3.26667
FGF14_ENST00000376143	4.42857
FGF3	4.65385
FGFR2_ENST00000457416	5.94366
FGFR3_ENST00000340107	6.39506
FOXA1	6.24
FRYL_ENST00000537810	4.51429
G3BP2	4.89474
GALNTL5	4.69565
GNA11	5.69767
GNAQ	4.67308
GNAS_ENST00000371100	5.39655
GNE	5.18182
GNE_ENST00000396594	5.09091
GOLGA5_ENST00000163416	3.16667
GPSM2	4.22727
GSK3B_ENST00000316626	3.2973
GTF2E1	4.84211
HDX	4.65625
HGF	3.90164
HNF1A	3.90123
HNRNPA2B1_ENST00000354667	4.84211
HNRNPK	5.31579
HOMEZ	4.47368
HOMEZ_ENST00000357460	4.57895
IDH3B	5.4375
IGF1_ENST00000307046	5.42105
IRF4_ENST00000380956	4.40984
IRS2	5.88333
ITGBL1	5.46667
KAT8	4.40909
KDM5A_ENST00000399788	4.69474
KIAA1731_ENST00000411936	3.93182
KLF4	6
KLHL5	5.46154
KLHL5_ENST00000359687	5.90909
KLHL5_ENST00000381930	5.72727
KLHL7	4.71429
KLK15	4.72
KMO	5.26087
KPNA5	4.7619
KRAS_ENST00000256078	123.154
LARGE_ENST00000452586	4.94444
LATS1_ENST00000543571	3.34951
LUM	4.40909
LUZP4	4.52381
MALT1_ENST00000348428	3.13043
MAP7D1	3.48718
MAP9	4.56667
MAPK1	5.08333
MAPK9_ENST00000452135	4.61111
MARCH7	4.5
MCMDC2	4.95833
MCMDC2_ENST00000313616	4.68182
MCMDC2_ENST00000422365	4.95833
MDM2	6.59091
MDM2_ENST00000462284	6.13636
MDM4	5.03846
MED12_ENST00000374080	4.63087
MGAT4C_ENST00000393205	4.69231
MIS18BP1	4.20513
MMP13	4.62069
MRE11A	3.79592
MRE11A_ENST00000323929	3.97917
MSL3_ENST00000398527	4.47368
MTF2	3.16
MTOR	4.68687
MYC	4.7037
MYC_ENST00000377970	4.68421
MYCL1_ENST00000397332	4.5
MYD88_ENST00000417037	5.89474
N4BP2L2	5.05882
NAA35	4.65
NBN	4.60976
NCOR1_ENST00000436828	3.16129
NDUFS1	5.55556
NMT2	4.42105
NOTCH4	4.94697
NOX5_ENST00000388866	4.52
NT5C2	5.18182
NTRK2	4.68116
NTRK2_ENST00000304053	4.84615
NTRK2_ENST00000376214	4.68657
NTRK2_ENST00000395882	4.77419
NXPE1	5.85714
OGT	5.82143
OGT_ENST00000373719	5.48276
OR6C75	3.25
PARN	5.05556
PARN_ENST00000437198	5.17647
PDS5A	4.57778
PHACTR2	4.95455
PHACTR4	3.09677
PIAS2	6.55556
PIAS2_ENST00000324794	5.1
PIK3C2G	4.704
PIK3C2G_ENST00000433979	4.66935
PIK3C2G_ENST00000538779	6.09859
PIK3CA_ENST00000263967	54.8026
PIK3CB	4.60317
PIK3R3_ENST00000540385	3.46154
PIP5K1C_ENST00000537021	4.5
PITRM1_ENST00000451104	4.57576
PKN2	4.76667
PLCG1	4.61798
PLEKHS1	4.68421
PMS1	3.7
POLE	4.55932
POLG2	5.73333
POLM	3.15385
POT1	4.2549
POT1_ENST00000357628	4.3617
POTEM	4.40741
POTEM_ENST00000551509	5.17391
PPHLN1_ENST00000432191	4.90476
PPP6C_ENST00000451402	4
PRB3_ENST00000538488	7.76471
PREPL	5.68421
PRKCI	5.75
PSPC1	4.63636
PTPRU_ENST00000323874	4.71429
PUS7	3.0303
RAC1_ENST00000356142	7.2
RAD50_ENST00000265335	5.07937
RAD51B_ENST00000487270	4.57895
RAF1	5.06522
RAF1_ENST00000442415	4.86957
RBM25	4.93939
REL	5.55556
RET	5.21341
RICTOR_ENST00000296782	4.50549
RIOK2	4.13043
RIOK3	4.7619
RNF19A	4.86667
ROCK2	3.25
RTN4_ENST00000337526	3.45
RUNX1_ENST00000325074	7.05882
RUNX1_ENST00000486278	5.95833
SAG	4.88889
SAG_ENST00000409110	5.05556
SBNO1	3.33333
SEC63	3.16216
SENP1_ENST00000448372	3.14286
SERPINB10	3.11538
SGIP1_ENST00000371039	5.25
SLC14A1	4.54545
SLC14A1_ENST00000436407	4.78261
SLC22A4	3.16667
SLC3A2	3.77273
SLITRK6	4.44615
SMARCA4_ENST00000358026	4.03333
SMC1A	5.2
SOX2	4.68
SSX2IP_ENST00000370612	4.45
SSX5	6.63158
STAM2	4.68421
SUFU	4.71429
SUPT16H	4.62162
TAF1	5.62687
TAF1_ENST00000276072	5.48438
TAF1_ENST00000449580	4.96774
TAF1B	3.43478
TBC1D2B_ENST00000300584	4.5
TBRG4	4.48
TCF12_ENST00000438423	5.04348
TCF12_ENST00000452095	5.36364
TCHP	3.68182
TGFBR2_ENST00000359013	4.83824
THOC2	4.55932
TJAP1	4.6
TJAP1_ENST00000372445	4.61111
TMEM161B	4.61905
TMPO_ENST00000266732	3.2963
TMTC3	5.45833
TNFRSF14_ENST00000355716	3.47826
TNPO1	3.02632
TP53_ENST00000269305	4.496
TP53_ENST00000414315	3.63239
TP53_ENST00000545858	6.01497
TRAFD1	5.66667
TRIM23	5.05556
TRIM48	5.16216
TRIM48_ENST00000417545	5.07895
TSHR	5.67143
TTC3_ENST00000540756	4.40909
TTK	3.40476
TTK_ENST00000369798	3.5
TUBD1	3.85714
TXLNA	6.85714
TXNRD1_ENST00000525566	4.73684
U2AF2	5.28571
U2SURP	5.43333
USO1_ENST00000538159	4.33333
USP8	4.95
VWC2L	4.7619
WDR47_ENST00000400794	3.13514
XPO1	5.29091
XRCC6	4.66667
XRN1	4.25862
ZFP2	4.73077
ZFP37	4.0625
ZFP37_ENST00000553380	4.84615
ZNF354B	5.05556
ZNF626_ENST00000392298	4.59016
ZNF649	4.5
ZNF711	5.31429
ZNF711_ENST00000373165	4.81579
ZNF844	6.8
