# Supplementary material for: Use of signals of positive and negative selection to distinguish cancer genes and passenger genes
Source: eLife. 2021 Jan 11;10:e59629. doi: 10.7554/eLife.59629 (PMC7877913; doi:10.7554/eLife.59629)
Supplement: Supplementary file 3. — Negatively selected genes discussed in detail in the present work are highlighted in dark green background. [file elife-59629-supp3.xlsx]

## Sheet: Supplementary file 3
Gene symbol	rSMN	WEG list (1 of 147 genes)	ZHOU list (32 of 112 gene)	DE KEGEL list (6 of 1014 genes)	ZAPATA list (4 of 25 genes)	PYATNITSKIY list (5 of 91 genes)
MLLT3	1.68		MLLT3
YTHDF3	1.40984
TBP	1.34694		TBP
FOXP2_ENST00000393500	1.29231
HOXD10	1.1358
ZBTB26	1.06061
RUNX2_ENST00000352853	1.04854
UBC	1.03846
FAM108A1	1.03774
RUNX2	1.02941
ZNF384_ENST00000361959	0.977273
PPP2R3B	0.961538		PPP2R3B
PPP2R3B_ENST00000390665	0.948718
EXT1	0.936782
ENTPD2	0.928571
CDCP2	0.894737
C17orf63	0.890411
FBXW2_ENST00000373926	0.873016
FOXG1	0.869822
PCDHB18	0.851485
C17orf63_ENST00000341217	0.851351
SOX1	0.84127
LCOR	0.794118
SLC16A3	0.789474
CRP	0.787879
RGR	0.785714
NTNG2_ENST00000372179	0.784314
MTNR1A	0.780488		MTNR1A
ZNF92	0.779528
CACNG2	0.779412
LINC00273	0.779221
LINC00273_ENST00000539813	0.779221
ZNF319	0.775
GP5	0.769231
MSL2	0.768293
NEUROD6	0.763359
NOVA1	0.759162
KRTAP5-4	0.753623
LHFPL3	0.75
GP5_ENST00000323007	0.743119
MATR3	0.73913
OPRL1	0.738636
PSAPL1_ENST00000319098	0.737705
NARFL	0.734375
FAM39B	0.731707
ADRA1B	0.730159
GPR31	0.724138
LHFPL3_ENST00000543266	0.721311
MFAP3L	0.716216
OR4X2	0.715596		OR4X2
SLC18A3	0.715232
HAPLN4	0.714286
PRLHR	0.712766
CYP27A1	0.712329
PNCK_ENST00000393831	0.712121
STEAP3_ENST00000409811	0.709677
PNCK_ENST00000370145	0.709677
NTNG2_ENST00000360670	0.708661
TRIM50	0.706667
AP1B1_ENST00000415447	0.706422
TRIM50_ENST00000333149	0.702703
ENG	0.701493
TMEM79	0.701493
KCNC1	0.700787
SBK1_ENST00000341901	0.7
TSSK6	0.7
MAPK13	0.7
SLC25A6	0.694444
CHST12	0.694118
OR4D1	0.692308
KCNN2_ENST00000512097	0.692308
RTDR1	0.692308
PRKACG	0.692308
KCNC1_ENST00000265969	0.691729
MMP14	0.691358
GJA3	0.690141			GJA3
IRF3	0.6875
OR10H2	0.6875
CaMK1b	0.6875
OR2A2	0.685714		OR2A2
LRRC8A	0.683761
OR5AK2	0.682927		OR5AK2
GRPR	0.682353
MESP2	0.681818		MESP2
GJB4	0.681818					GJB4
SLC6A20	0.68		SLC6A20
EEF1D_ENST00000423316	0.68
GTPBP5	0.676923
LRRTM2	0.674699
EME2_ENST00000307394	0.672131
RBM4	0.671233
ITGA11	0.67027		ITGA11
OR4C3	0.669421		OR4C3
TMEM130	0.666667
HOXA11	0.666667
PACSIN2	0.666667
CETP	0.666667
ZNF629	0.666667
DHCR7_ENST00000355527	0.666667
ZNF517	0.666667
HOXD3	0.663043		HOXD3
TBC1D24	0.662921
PLUNC	0.661765
ZNF503	0.661538
SLC2A8	0.661538
KCNG4	0.661417
GFPT2	0.660714
MYADM	0.658537
DHCR7	0.658537
SLC2A1	0.658537
SNX8	0.657895
NTNG2	0.656934
SLC13A3_ENST00000372121	0.656716
SARDH_ENST00000371868	0.656716
OR1G1	0.65625		OR1G1
TBR1	0.656
C17orf70	0.654867
OR6M1	0.654321
HNRNPR	0.654321
HNRPR	0.654321
EGR4	0.651515
SLC6A20_ENST00000358525	0.651376
TBXA2R	0.650602
SLC45A4	0.649718
C15orf27	0.649351
SLCO4A1	0.648
CCT7_ENST00000258091	0.647887
CHRM4	0.647727
ZNRF4	0.647541
THBD	0.647059
CRISPLD2	0.646154					CRISPLD2
AMIGO3	0.645833
SLC45A1	0.643939		SLC45A1			SLC45A1
SLC47A1	0.641975
KCNJ11	0.641791
SSTR5	0.640625
SLC26A6_ENST00000383733	0.640449
FOXD4	0.64
NPTX2	0.64
FOXP2_ENST00000403559	0.639241
PCDHA9	0.639241		PCDHA9
PNCK_ENST00000447676	0.638889
EHD3	0.638655
SLC7A10	0.638554
ENG_ENST00000373203	0.637681
TRPV4	0.636986
PCDHGA12	0.636752					PCDHGA12
GPR108	0.636364
ZNF135	0.636364
FUS_ENST00000254108	0.636364
CX3CR1	0.636364
SLC1A7	0.636364
CBX6	0.636364
OR10G8	0.634921
LHFPL5	0.634921
GJA8	0.634731
PCDHGA12_ENST00000252085	0.634043
MRGPRX1	0.633987		MRGPRX1
HCRTR1	0.633803
SLC9A3	0.633588		SLC9A3			SLC9A3
KCNG1_ENST00000396017	0.633333
HSPA2	0.632479
PNKP_ENST00000322344	0.632353
RP3-402G11_5	0.632353
C17orf70_ENST00000327787	0.632
EEF1D	0.631579
OR1F1	0.630952		OR1F1
ENSG00000198064	0.630137
IGSF21	0.62963
GAA	0.629371
TRIB2	0.629032
SYT7	0.628866
SP3_ENST00000310015	0.628788
SLC6A18	0.628571
FZD2	0.628099
FOXI1	0.627451
CACNB1	0.626866
PSEN2	0.626866
OR2C1	0.626866
GPR77	0.626667
LMX1B	0.626506
HOXB3	0.625
TBX10	0.625
BTN3A1	0.625
KCNK3	0.625
OR2T34	0.625
ZNF135_ENST00000401053	0.62406
OR2A5	0.62406
DAGLB	0.623762		DAGLB		DAGLB
IMP5	0.623762
KLHL14_ENST00000358095	0.623529
KCNQ1_ENST00000335475	0.623529
RPN2	0.623188			RPN2
PNKP	0.623188
PRF1	0.621622
OR2B11	0.621359
FBXO7_ENST00000382058	0.621212
CALB2	0.621212
OR1C1	0.620968		OR1C1
UPF3A	0.619718
PLBD2	0.619718
ITPRIP	0.619565
CLCN7	0.619469
LMX1B_ENST00000355497	0.619048
GPR26	0.617978
SLC45A1_ENST00000377479	0.617886
NXN	0.615385
GABRD	0.614583
HS3ST3A1	0.614286
FUS	0.613636
NCK2	0.613636
OR2A12	0.613208		OR2A12
ANKMY1_ENST00000405523	0.6125
PRR5	0.61194
OR8B12	0.61		OR8B12
TUBB4	0.609929
KRT85	0.609524
DMRT3	0.609091
KCNN4	0.608696
PRSS38	0.608696
EHD4	0.607143
OR3A4	0.606061
RTN4RL1	0.605263
GRM6	0.604743
FUT1	0.604167
BCL11A_ENST00000356842	0.603306
AP1M1	0.602941
KLHDC8A	0.602564
SLC5A2	0.601695
OR10G7	0.601695		OR10G7
TRPV1_ENST00000174621	0.6
KRT82	0.6
PRAMEF2	0.6
LMX1B_ENST00000373474	0.6
S1PR3	0.6
OR10H1	0.6
ABCG8	0.59854
SLC22A11	0.598291
BDKRB2	0.597826
IRF2BPL	0.597826		IRF2BPL
NGFR	0.597561
ZNF730	0.597561
OR6C65	0.597403
FEM1A	0.597222
VSIG1_ENST00000415430	0.597222
CCNJL	0.597015
SLC46A2	0.597015
CCDC116	0.59596
CX3CR1_ENST00000358309	0.595506
AP1B1	0.595238		AP1B1		AP1B1
NMUR2	0.595238
IRGQ	0.594937
DENND1A_ENST00000373620	0.594595
KCNN2	0.594406
PRKAR1B	0.594203
PAOX_ENST00000357296	0.594203
SERPINA5	0.594059
NCK2_ENST00000233154	0.59375
LGR6_ENST00000439764	0.59375
DENND1A_ENST00000373618	0.59375
KRT15	0.59292
GCK_ENST00000395796	0.59292
DRD2_ENST00000355319	0.59292
OR2W3	0.592857
FOXP2	0.592391
PCDHA9_ENST00000532602	0.591398
PCDHGA3_ENST00000253812	0.591241
ASMTL	0.590909
TBX19	0.590361
BTBD17	0.589744
PGC	0.589744
ACTA1	0.589474
SLC20A2	0.589286
PCDHA11	0.588957
AQP7	0.588889			AQP7
PCDHGB1_ENST00000523390	0.58871
ANKS3	0.588235
VIPR1	0.588235
SYN1_ENST00000295987	0.588235
BARHL2	0.588235
ASMTL_ENST00000381317	0.588235
SLC26A6	0.587629
ZNF813	0.587629
SLC12A7	0.587571
FCN2	0.5875
ABCB8_ENST00000356058	0.587302
SEC14L4	0.586667
LRRC33	0.586466
GP1BA	0.586207
SLC16A12_ENST00000371790	0.585714
WNT5B_ENST00000397196	0.585714
IL12RB1	0.585714
MSN	0.585586
PNMAL2_ENST00000599531	0.585586
ACKR3	0.584906		ACKR3
CBLN4	0.584615
EME2	0.584615
ETV4_ENST00000319349	0.584615
FBRS_ENST00000356166	0.584416
ADRA1A_ENST00000358857	0.584416
OR11G2	0.583333
PRR5-ARHGAP8	0.583333
RP11-368J21.2_ENST00000424340	0.583333
SLC34A2	0.582857
KCNQ1	0.582524
PCDHGB1	0.582329
OTX1	0.582278
OR2L1P	0.58209
ST3GAL1	0.58209
STC2	0.581633
TREML2	0.581395
C17orf28	0.580357
SLC41A1	0.580247
QSOX1	0.579832
SS18L1_ENST00000331758	0.57971
ZAN_ENST00000546213	0.579545
RP11-368J21.2	0.57931
ADRA1A_ENST00000380572	0.578947
SLC35F3	0.578571
ARHGEF16	0.578313
CYP4F11	0.578231
RPS6KL1	0.578125
TNK1	0.578125
SLC24A3	0.57764
PRR5_ENST00000403581	0.577465
PUF60	0.577465			PUF60
CHST4	0.576923
PRAM1	0.576271
EHD1	0.576087
LGR6_ENST00000255432	0.576
SLC45A4_ENST00000517878	0.575949
MOS	0.575758
OR10P1	0.575342
CDK18_ENST00000429964	0.575
HIC1_ENST00000322941	0.575
PCDHGA3	0.574803		PCDHGA3
ALPL	0.573913
FBXL18	0.57377
BCL11A	0.573643
OR5AU1	0.573529
LRRC14B	0.573333
ZNF71	0.573333
CHRNG	0.573333
OR5B2	0.573171		OR5B2
SLITRK1	0.573099
SPATA20	0.572519
ACTL9	0.572368
ANGPTL2	0.571429
AQP7_ENST00000539936	0.570621
GPR97	0.57
PCDHGA9	0.569767
PCDHGA9_ENST00000573521	0.569767
CRHR2_ENST00000348438	0.569767
PDE6B	0.569697
S1PR5	0.569444
ENPP7	0.568807
PTX4	0.568627
NPIPL3	0.568627
FBXL18_ENST00000453700	0.568
PIGG_ENST00000453061	0.567901
DHRS2_ENST00000344777	0.567568
WDR18	0.567568		WDR18	WDR18
CACNG5	0.567568
PRR23C	0.567568
TBXA2R_ENST00000411851	0.56701
ITFG3_ENST00000450082	0.566265
FOXD4_ENST00000382500	0.566265
RHO	0.566265
SERPINA6	0.566265
GGN	0.566038
SLC28A1_ENST00000537624	0.566038
VSIG1_ENST00000444426	0.565789
IL12RB1_ENST00000593993	0.565574
ATP2B3_ENST00000370186	0.565401
OR2Y1	0.565217
TAS2R1	0.565217
DLL1	0.565217
TFAP2D	0.565217
TTLL8_ENST00000440475	0.565217
PCDHGA5	0.564286
BIN1	0.564103
CPN2	0.564103
ATHL1	0.564103
MAP4K1_ENST00000396857	0.56391
FBXL18_ENST00000382368	0.56391
ST8SIA5	0.56383
KIR3DL1_ENST00000402254	0.563636
IL12RB1_ENST00000430026	0.563492
NDST1	0.563492
TRIO_ENST00000344135	0.563218
TSC22D2	0.563218
LIN54	0.562963
PCDHGA5_ENST00000518069	0.562724
ATP2B3	0.5625
DFNA5	0.5625
HSD3B1	0.5625
TMEM214	0.5625				TMEM214
HIC1	0.5625
CHRNB2	0.561983
SLC8A3	0.561798		SLC8A3
VSIG1	0.561644
STEAP3_ENST00000393110	0.560976
BPI	0.560748
GSDMB	0.560606
SKOR2	0.560606
AMDHD2_ENST00000413459	0.560606
SARDH	0.560606
DIRAS3	0.560606
PROM2	0.56051
CRHR2	0.56044
P2RY2	0.56044
TACR1	0.559524
CNKSR3	0.559524
SIX6	0.558824
MRGPRD	0.558824
FASTK	0.558824
SLC39A4_ENST00000276833	0.55814
BCMO1	0.557895
TAS2R38	0.557895
SLC22A14	0.557692
NLRC3	0.557214
WDR20_ENST00000454394	0.557143
CYP4F2	0.557143
TGIF2LX	0.556962
WDR1_ENST00000499869	0.556962
CRMP1	0.556818
G6PD_ENST00000393562	0.556818
CARD9_ENST00000371734	0.556818
SHANK3_ENST00000445220	0.555556
DRD2	0.555556
ENSG00000226807	0.555556
OR4D9	0.554348
OR5M10	0.554348
GHSR_ENST00000427970	0.554217
IGF2BP2_ENST00000421047	0.554217
SLC19A3	0.554217
OR2T4	0.554217
ARID5A	0.554054
TTLL8	0.554054
OR52N5	0.554054
ZSCAN2	0.554054
KRTAP27-1	0.553846
EPHB2_ENST00000374627	0.553763
PCDHA11_ENST00000398640	0.553659
ZNF224	0.553191
OR10R2	0.55303
SPNS3	0.552941
CHST11	0.552941
GDF6	0.552846
CHD5_ENST00000262450	0.552632
MAML2	0.552326		MAML2
RNF26	0.552239
MSI1	0.552239
HAPLN3	0.552239
OTX2	0.552083
GLT6D1	0.551724
C5AR1	0.551724
GSDMB_ENST00000418519	0.550725
BCL2_ENST00000444484	0.550725
NFE2L1	0.550459
SERPINA6_ENST00000341584	0.55
FAM181A	0.54878	FAM181A
DHRS2	0.547945
TRPV1_ENST00000399756	0.54717
FBXO7_ENST00000266087	0.546667
OPRM1_ENST00000414028	0.546667
FURIN	0.545455
NFIX_ENST00000360105	0.544304
ADD1_ENST00000398125	0.544304
OR9A4	0.54386
NPEPPS	0.543689
WNT9B	0.542857
FBXO7	0.539474
ANKMY1_ENST00000361678	0.53913
ZNF238_ENST00000358704	0.538462
MCHR2_ENST00000369212	0.538462
PRL	0.538462
ANKRD33	0.5375
TP73_ENST00000378288	0.535354
AGT	0.535354
GPR152	0.534884
CES5A	0.533898
DMRTB1	0.533333
PPP2R5D	0.533333
GAS6_ENST00000355761	0.532609
NFIX	0.530864
KRI1	0.528846			KRI1	KRI1
MAP4_ENST00000395734	0.527559
LRRC52	0.526316
CNR1	0.524823
TAS2R60	0.524752
SERPINA4	0.522523
HOXD12	0.522388
OR7C2	0.521739
CD93	0.518135
KCNK1	0.516854		KCNK1
ZNF238	0.515464
SLC16A12	0.514706
OR7C1	0.514286
KIF25	0.51
BDKRB1	0.507246
HKR1_ENST00000392153	0.506667
WDR20	0.506173
ACRBP	0.505882
CES5A_ENST00000521992	0.503704
