# Supplementary material for: Use of signals of positive and negative selection to distinguish cancer genes and passenger genes
Source: eLife. 2021 Jan 11;10:e59629. doi: 10.7554/eLife.59629 (PMC7877913; doi:10.7554/eLife.59629)
Supplement: Supplementary file 4. [file elife-59629-supp4.xlsx]

## Sheet: CG_SO2SD_rSMN>0.5
CG_SO2SD_rSMN>0.5	rSMN	CG_SO*2SD_ rSMN>1.50	rSMN*
MLLT3	1.68	MLLT3	5.52346
YTHDF3	1.40984	YTHDF3	4.53132
TBP	1.34694	TBP	3.8894
ZBTB26	1.06061	ZBTB26	3.77853
HOXD10	1.1358	HOXD10	3.33656
RUNX2	1.02941	RUNX2	2.92321
ZNF92	0.779528	ZNF92	2.86576
ZNF384_ENST00000361959	0.977273	ZNF384_ENST00000361959	2.63373
EXT1	0.936782	EXT1	2.53939
LCOR	0.794118	LCOR	2.50728
PPP2R3B	0.961538	PPP2R3B	2.49655
MATR3	0.73913	MATR3	2.48834
SOX1	0.84127	SOX1	2.44615
KRTAP5-4	0.753623	KRTAP5-4	2.4396
MSL2	0.768293	MSL2	2.4253
UBC	1.03846	UBC	2.40098
FOXG1	0.869822	FOXG1	2.31595
ENTPD2	0.928571	ENTPD2	2.30864
ZNF730	0.597561	ZNF730	2.25267
NEUROD6	0.763359	NEUROD6	2.22201
CDCP2	0.894737	CDCP2	2.1441
FOXP2_ENST00000403559	0.639241	FOXP2_ENST00000403559	2.12347
ZNF319	0.775	ZNF319	2.0872
CRP	0.787879	CRP	2.06836
HNRNPR	0.654321	HNRNPR	2.04527
NTNG2_ENST00000372179	0.784314	NTNG2_ENST00000372179	2.03486
		DSPP	2.01728
ZNF813	0.587629	ZNF813	2.01481
NOVA1	0.759162	NOVA1	1.99444
FOXP2	0.592391	FOXP2	1.97248
CACNG2	0.779412	CACNG2	1.93896
ZNF224	0.553191	ZNF224	1.93137
PACSIN2	0.666667	PACSIN2	1.90322
OR5AK2	0.682927	OR5AK2	1.89873
RGR	0.785714	RGR	1.89863
ZNF135	0.636364	ZNF135	1.89629
LRRTM2	0.674699	LRRTM2	1.89479
MFAP3L	0.716216	MFAP3L	1.87744
LHFPL3	0.75	LHFPL3	1.85904
SLC16A3	0.789474	SLC16A3	1.85742
KRTAP27-1	0.553846	KRTAP27-1	1.85351
OR4X2	0.715596	OR4X2	1.82274
		ZNF682	1.82033
GP5	0.769231	GP5	1.81955
MTNR1A	0.780488	MTNR1A	1.80574
TRIM50	0.706667	TRIM50	1.80517
MESP2	0.681818	MESP2	1.80357
UPF3A	0.619718	UPF3A	1.79404
STEAP3_ENST00000409811	0.709677	STEAP3_ENST00000409811	1.7838
MMP14	0.691358	MMP14	1.78093
HOXA11	0.666667	HOXA11	1.77629
ZNF629	0.666667	ZNF629	1.77214
OR6C65	0.597403	OR6C65	1.77139
ENG	0.701493	ENG	1.76977
CYP27A1	0.712329	CYP27A1	1.7678
PNCK_ENST00000370145	0.709677	PNCK_ENST00000370145	1.76161
MAPK13	0.7	MAPK13	1.75183
NTNG2	0.656934	NTNG2	1.74986
RBM4	0.671233	RBM4	1.74842
OPRL1	0.738636	OPRL1	1.74468
OR4C3	0.669421	OR4C3	1.74437
TBR1	0.656	TBR1	1.74374
		ZNF30	1.7431
KCNC1	0.700787	KCNC1	1.74139
CRISPLD2	0.646154	CRISPLD2	1.7404
CHST12	0.694118	CHST12	1.73812
LMX1B	0.626506	LMX1B	1.73561
BTN3A1	0.625	BTN3A1	1.73353
THBD	0.647059	THBD	1.73353
IRF3	0.6875	IRF3	1.73298
HAPLN4	0.714286	HAPLN4	1.73104
		ZNF33A_ENST00000432900	1.72818
TSSK6	0.7	TSSK6	1.7239
LIN54	0.562963	LIN54	1.71947
GJA3	0.690141	GJA3	1.71313
ZNF517	0.666667	ZNF517	1.71291
OR4D1	0.692308	OR4D1	1.7099
TMEM130	0.666667	TMEM130	1.70579
ZSCAN2	0.554054	ZSCAN2	1.6998
OR2A2	0.685714	OR2A2	1.69911
PRKACG	0.692308	PRKACG	1.69694
		NCBP1	1.69263
ADRA1B	0.730159	ADRA1B	1.69021
SLC18A3	0.715232	SLC18A3	1.6859
		ZNF83	1.68298
AP1B1_ENST00000415447	0.706422	AP1B1_ENST00000415447	1.67947
TMEM79	0.701493	TMEM79	1.67902
ANKMY1_ENST00000405523	0.6125	ANKMY1_ENST00000405523	1.67827
		BTBD7_ENST00000298896	1.67364
FUS	0.613636	FUS	1.67193
BCL11A_ENST00000356842	0.603306	BCL11A_ENST00000356842	1.67189
GFPT2	0.660714	GFPT2	1.66733
LMX1B_ENST00000373474	0.6	LMX1B_ENST00000373474	1.66653
PRLHR	0.712766	PRLHR	1.66281
CALB2	0.621212	CALB2	1.66071
SLC45A4	0.649718	SLC45A4	1.65712
GPR31	0.724138	GPR31	1.65515
SLC25A6	0.694444	SLC25A6	1.65446
		FAF1	1.64982
KCNG4	0.661417	KCNG4	1.64636
ITGA11	0.67027	ITGA11	1.64357
		ZNF443	1.64283
MAML2	0.552326	MAML2	1.63959
		ZFP14	1.63816
HOXD3	0.663043	HOXD3	1.63374
NGFR	0.597561	NGFR	1.63187
ZNRF4	0.647541	ZNRF4	1.63183
		ZNF681	1.63153
CETP	0.666667	CETP	1.62979
GRPR	0.682353	GRPR	1.6295
TBC1D24	0.662921	TBC1D24	1.62823
		ZNF519	1.62688
DAGLB	0.623762	DAGLB	1.62611
EEF1D	0.631579	EEF1D	1.62607
SNX8	0.657895	SNX8	1.61732
KCNN2	0.594406	KCNN2	1.61533
NCK2	0.613636	NCK2	1.6152
OR1G1	0.65625	OR1G1	1.61495
FOXI1	0.627451	FOXI1	1.61481
NPEPPS	0.543689	NPEPPS	1.61441
PRF1	0.621622	PRF1	1.6131
SLC6A20	0.68	SLC6A20	1.6129
SLC2A8	0.661538	SLC2A8	1.61138
BCL11A	0.573643	BCL11A	1.6089
PCDHGA12	0.636752	PCDHGA12	1.60856
BARHL2	0.588235	BARHL2	1.6083
OR10H2	0.6875	OR10H2	1.60667
WDR20_ENST00000454394	0.557143	WDR20_ENST00000454394	1.60545
NPTX2	0.64	NPTX2	1.60374
DENND1A_ENST00000373620	0.594595	DENND1A_ENST00000373620	1.60371
CX3CR1	0.636364	CX3CR1	1.60367
ANKS3	0.588235	ANKS3	1.59846
SLCO4A1	0.648	SLCO4A1	1.5975
RPN2	0.623188	RPN2	1.59728
HOXB3	0.625	HOXB3	1.59648
FOXD4	0.64	FOXD4	1.59491
OR1C1	0.620968	OR1C1	1.59073
GJB4	0.681818	GJB4	1.59066
GCK_ENST00000395796	0.59292	GCK_ENST00000395796	1.58767
		GTF3C3	1.58634
SARDH_ENST00000371868	0.656716	SARDH_ENST00000371868	1.58631
		ZNF33A	1.58474
EGR4	0.651515	EGR4	1.58444
CACNB1	0.626866	CACNB1	1.58184
ZNF503	0.661538	ZNF503	1.58156
IL12RB1	0.585714	IL12RB1	1.58074
PCDHA9	0.639241	PCDHA9	1.57688
CCDC116	0.59596	CCDC116	1.57615
AMIGO3	0.645833	AMIGO3	1.57368
ITPRIP	0.619565	ITPRIP	1.57355
TRIB2	0.629032	TRIB2	1.57308
TFAP2D	0.565217	TFAP2D	1.57298
		ADAM28_ENST00000437154	1.57208
VSIG1	0.561644	VSIG1	1.5712
		RASSF6	1.57113
FUT1	0.604167	FUT1	1.56808
DENND1A_ENST00000373618	0.59375	DENND1A_ENST00000373618	1.56674
DMRT3	0.609091	DMRT3	1.56645
CHST4	0.576923	CHST4	1.56536
TBXA2R	0.650602	TBXA2R	1.56334
GAA	0.629371	GAA	1.56296
GJA8	0.634731	GJA8	1.56218
KCNJ11	0.641791	KCNJ11	1.56194
MSN	0.585586	MSN	1.56188
GSDMB	0.560606	GSDMB	1.56068
OTX1	0.582278	OTX1	1.55947
OR2T34	0.625	OR2T34	1.55889
DHCR7	0.658537	DHCR7	1.558
OR6M1	0.654321	OR6M1	1.55654
SLC47A1	0.641975	SLC47A1	1.55619
KLHL14_ENST00000358095	0.623529	KLHL14_ENST00000358095	1.55609
PRR5	0.61194	PRR5	1.55438
TGIF2LX	0.556962	TGIF2LX	1.55417
OR1F1	0.630952	OR1F1	1.55227
		SIAH3	1.55038
FZD2	0.628099	FZD2	1.54955
SYT7	0.628866	SYT7	1.54896
TBX19	0.590361	TBX19	1.54755
SLC26A6_ENST00000383733	0.640449	SLC26A6_ENST00000383733	1.54507
STC2	0.581633	STC2	1.54444
PLBD2	0.619718	PLBD2	1.54413
OTX2	0.552083	OTX2	1.54251
CCNJL	0.597015	CCNJL	1.5416
IRF2BPL	0.597826	IRF2BPL	1.54068
SERPINA5	0.594059	SERPINA5	1.54053
		ADAMTS12_ENST00000515401	1.54039
DLL1	0.565217	DLL1	1.5401
NXN	0.615385	NXN	1.53977
TSC22D2	0.563218	TSC22D2	1.53956
LRRC8A	0.683761	LRRC8A	1.53933
HKR1_ENST00000392153	0.506667	HKR1_ENST00000392153	1.53909
OR8B12	0.61	OR8B12	1.53442
		CNTNAP3B	1.53417
OR10G8	0.634921	OR10G8	1.53347
HS3ST3A1	0.614286	HS3ST3A1	1.53009
		ZNF564	1.52872
		ZDHHC11_ENST00000424784	1.52823
KRT85	0.609524	KRT85	1.52752
IL12RB1_ENST00000593993	0.565574	IL12RB1_ENST00000593993	1.52638
CBX6	0.636364	CBX6	1.52613
PNKP	0.623188	PNKP	1.52507
TBX10	0.625	TBX10	1.52253
		EPC2	1.52253
EHD3	0.638655	EHD3	1.52192
		TDRD12	1.51993
		SOX11	1.51964
MYADM	0.658537	MYADM	1.51907
		HSPD1	1.51903
KCNQ1_ENST00000335475	0.623529	KCNQ1_ENST00000335475	1.51882
ZNF71	0.573333	ZNF71	1.51861
CHRM4	0.647727	CHRM4	1.51774
		TBX5_ENST00000526441	1.5176
LHFPL5	0.634921	LHFPL5	1.51754
HSPA2	0.632479	HSPA2	1.51737
		ZNF880	1.51305
MRGPRX1	0.633987	MRGPRX1	1.51297
PCDHGB1	0.582329	PCDHGB1	1.51184
SLC6A18	0.628571	SLC6A18	1.51022
SLC24A3	0.57764	SLC24A3	1.50946
KCNN4	0.608696	KCNN4	1.50884
OR2A5	0.62406	OR2A5	1.50869
PRAMEF2	0.6	PRAMEF2	1.50778
OR2A12	0.613208	OR2A12	1.50713
TRPV4	0.636986	TRPV4	1.5061
		ZNF816	1.50584
KRT15	0.59292	KRT15	1.50584
		ZSCAN21	1.50564
		C16orf46_ENST00000378611	1.50542
		TRIM49B	1.50505
GRM6	0.604743	GRM6	1.50151
FBXO7	0.539474	FBXO7	1.50129
KCNK3	0.625
PSEN2	0.626866
PGC	0.589744
CYP4F11	0.578231
TREML2	0.581395
PCDHGA9	0.569767
GPR108	0.636364
SPATA20	0.572519
ADD1_ENST00000398125	0.544304
PAOX_ENST00000357296	0.594203
SSTR5	0.640625
EHD4	0.607143
SLC45A1	0.643939
IGSF21	0.62963
PRKAR1B	0.594203
CNKSR3	0.559524
SLC16A12	0.514706
ARHGEF16	0.578313
SLC8A3	0.561798
KRT82	0.6
RTN4RL1	0.605263
EME2	0.584615
SEC14L4	0.586667
PRR23C	0.567568
FEM1A	0.597222
KRI1	0.528846
RPS6KL1	0.578125
BTBD17	0.589744
ASMTL	0.590909
PRSS38	0.608696
MSI1	0.552239
VIPR1	0.588235
GPR26	0.617978
OR11G2	0.583333
WDR18	0.567568
BIN1	0.564103
SLC22A11	0.598291
SLC9A3	0.633588
SKOR2	0.560606
ABCB8_ENST00000356058	0.587302
ABCG8	0.59854
ACKR3	0.584906
ACRBP	0.505882
ACTA1	0.589474
ACTL9	0.572368
ADRA1A_ENST00000358857	0.584416
ADRA1A_ENST00000380572	0.578947
AGT	0.535354
ALPL	0.573913
AMDHD2_ENST00000413459	0.560606
ANGPTL2	0.571429
ANKMY1_ENST00000361678	0.53913
ANKRD33	0.5375
AP1B1	0.595238
AP1M1	0.602941
AQP7	0.588889
AQP7_ENST00000539936	0.570621
ARID5A	0.554054
ASMTL_ENST00000381317	0.588235
ATHL1	0.564103
ATP2B3	0.5625
ATP2B3_ENST00000370186	0.565401
BCL2_ENST00000444484	0.550725
BCMO1	0.557895
BDKRB1	0.507246
BDKRB2	0.597826
BPI	0.560748
C15orf27	0.649351
C17orf28	0.580357
C17orf63	0.890411
C17orf63_ENST00000341217	0.851351
C17orf70	0.654867
C17orf70_ENST00000327787	0.632
C5AR1	0.551724
CACNG5	0.567568
CaMK1b	0.6875
CARD9_ENST00000371734	0.556818
CBLN4	0.584615
CCT7_ENST00000258091	0.647887
CD93	0.518135
CDK18_ENST00000429964	0.575
CES5A	0.533898
CES5A_ENST00000521992	0.503704
CHD5_ENST00000262450	0.552632
CHRNB2	0.561983
CHRNG	0.573333
CHST11	0.552941
CLCN7	0.619469
CNR1	0.524823
CPN2	0.564103
CRHR2	0.56044
CRHR2_ENST00000348438	0.569767
CRMP1	0.556818
CX3CR1_ENST00000358309	0.595506
CYP4F2	0.557143
DFNA5	0.5625
DHCR7_ENST00000355527	0.666667
DHRS2	0.547945
DHRS2_ENST00000344777	0.567568
DIRAS3	0.560606
DMRTB1	0.533333
DRD2	0.555556
DRD2_ENST00000355319	0.59292
EEF1D_ENST00000423316	0.68
EHD1	0.576087
EME2_ENST00000307394	0.672131
ENG_ENST00000373203	0.637681
ENPP7	0.568807
ENSG00000198064	0.630137
ENSG00000226807	0.555556
EPHB2_ENST00000374627	0.553763
ETV4_ENST00000319349	0.584615
FAM108A1	1.03774
FAM181A	0.54878
FAM39B	0.731707
FASTK	0.558824
FBRS_ENST00000356166	0.584416
FBXL18	0.57377
FBXL18_ENST00000382368	0.56391
FBXL18_ENST00000453700	0.568
FBXO7_ENST00000266087	0.546667
FBXO7_ENST00000382058	0.621212
FBXW2_ENST00000373926	0.873016
FCN2	0.5875
FOXD4_ENST00000382500	0.566265
FOXP2_ENST00000393500	1.29231
FURIN	0.545455
FUS_ENST00000254108	0.636364
G6PD_ENST00000393562	0.556818
GABRD	0.614583
GAS6_ENST00000355761	0.532609
GDF6	0.552846
GGN	0.566038
GHSR_ENST00000427970	0.554217
GLT6D1	0.551724
GP1BA	0.586207
GP5_ENST00000323007	0.743119
GPR152	0.534884
GPR77	0.626667
GPR97	0.57
GSDMB_ENST00000418519	0.550725
GTPBP5	0.676923
HAPLN3	0.552239
HCRTR1	0.633803
HIC1	0.5625
HIC1_ENST00000322941	0.575
HNRPR	0.654321
HOXD12	0.522388
HSD3B1	0.5625
IGF2BP2_ENST00000421047	0.554217
IL12RB1_ENST00000430026	0.563492
IMP5	0.623762
IRGQ	0.594937
ITFG3_ENST00000450082	0.566265
KCNC1_ENST00000265969	0.691729
KCNG1_ENST00000396017	0.633333
KCNK1	0.516854
KCNN2_ENST00000512097	0.692308
KCNQ1	0.582524
KIF25	0.51
KIR3DL1_ENST00000402254	0.563636
KLHDC8A	0.602564
LGR6_ENST00000255432	0.576
LGR6_ENST00000439764	0.59375
LHFPL3_ENST00000543266	0.721311
LINC00273	0.779221
LINC00273_ENST00000539813	0.779221
LMX1B_ENST00000355497	0.619048
LRRC14B	0.573333
LRRC33	0.586466
LRRC52	0.526316
MAP4_ENST00000395734	0.527559
MAP4K1_ENST00000396857	0.56391
MCHR2_ENST00000369212	0.538462
MOS	0.575758
MRGPRD	0.558824
NARFL	0.734375
NCK2_ENST00000233154	0.59375
NDST1	0.563492
NFE2L1	0.550459
NFIX	0.530864
NFIX_ENST00000360105	0.544304
NLRC3	0.557214
NMUR2	0.595238
NPIPL3	0.568627
NTNG2_ENST00000360670	0.708661
OPRM1_ENST00000414028	0.546667
OR10G7	0.601695
OR10H1	0.6
OR10P1	0.575342
OR10R2	0.55303
OR2B11	0.621359
OR2C1	0.626866
OR2L1P	0.58209
OR2T4	0.554217
OR2W3	0.592857
OR2Y1	0.565217
OR3A4	0.606061
OR4D9	0.554348
OR52N5	0.554054
OR5AU1	0.573529
OR5B2	0.573171
OR5M10	0.554348
OR7C1	0.514286
OR7C2	0.521739
OR9A4	0.54386
P2RY2	0.56044
PCDHA11	0.588957
PCDHA11_ENST00000398640	0.553659
PCDHA9_ENST00000532602	0.591398
PCDHB18	0.851485
PCDHGA12_ENST00000252085	0.634043
PCDHGA3	0.574803
PCDHGA3_ENST00000253812	0.591241
PCDHGA5	0.564286
PCDHGA5_ENST00000518069	0.562724
PCDHGA9_ENST00000573521	0.569767
PCDHGB1_ENST00000523390	0.58871
PDE6B	0.569697
PIGG_ENST00000453061	0.567901
PLUNC	0.661765
PNCK_ENST00000393831	0.712121
PNCK_ENST00000447676	0.638889
PNKP_ENST00000322344	0.632353
PNMAL2_ENST00000599531	0.585586
PPP2R3B_ENST00000390665	0.948718
PPP2R5D	0.533333
PRAM1	0.576271
PRL	0.538462
PROM2	0.56051
PRR5_ENST00000403581	0.577465
PRR5-ARHGAP8	0.583333
PSAPL1_ENST00000319098	0.737705
PTX4	0.568627
PUF60	0.577465
QSOX1	0.579832
RHO	0.566265
RNF26	0.552239
RP11-368J21.2	0.57931
RP11-368J21.2_ENST00000424340	0.583333
RP3-402G11_5	0.632353
RTDR1	0.692308
RUNX2_ENST00000352853	1.04854
S1PR3	0.6
S1PR5	0.569444
SARDH	0.560606
SBK1_ENST00000341901	0.7
SERPINA4	0.522523
SERPINA6	0.566265
SERPINA6_ENST00000341584	0.55
SHANK3_ENST00000445220	0.555556
SIX6	0.558824
SLC12A7	0.587571
SLC13A3_ENST00000372121	0.656716
SLC16A12_ENST00000371790	0.585714
SLC19A3	0.554217
SLC1A7	0.636364
SLC20A2	0.589286
SLC22A14	0.557692
SLC26A6	0.587629
SLC28A1_ENST00000537624	0.566038
SLC2A1	0.658537
SLC34A2	0.582857
SLC35F3	0.578571
SLC39A4_ENST00000276833	0.55814
SLC41A1	0.580247
SLC45A1_ENST00000377479	0.617886
SLC45A4_ENST00000517878	0.575949
SLC46A2	0.597015
SLC5A2	0.601695
SLC6A20_ENST00000358525	0.651376
SLC7A10	0.638554
SLITRK1	0.573099
SP3_ENST00000310015	0.628788
SPNS3	0.552941
SS18L1_ENST00000331758	0.57971
ST3GAL1	0.58209
ST8SIA5	0.56383
STEAP3_ENST00000393110	0.560976
SYN1_ENST00000295987	0.588235
TACR1	0.559524
TAS2R1	0.565217
TAS2R38	0.557895
TAS2R60	0.524752
TBXA2R_ENST00000411851	0.56701
TMEM214	0.5625
TNK1	0.578125
TP73_ENST00000378288	0.535354
TRIM50_ENST00000333149	0.702703
TRIO_ENST00000344135	0.563218
TRPV1_ENST00000174621	0.6
TRPV1_ENST00000399756	0.54717
TTLL8	0.554054
TTLL8_ENST00000440475	0.565217
TUBB4	0.609929
VSIG1_ENST00000415430	0.597222
VSIG1_ENST00000444426	0.565789
WDR1_ENST00000499869	0.556962
WDR20	0.506173
WNT5B_ENST00000397196	0.585714
WNT9B	0.542857
ZAN_ENST00000546213	0.579545
ZNF135_ENST00000401053	0.62406
ZNF238	0.515464
ZNF238_ENST00000358704	0.538462
