# Supplementary material for: Use of signals of positive and negative selection to distinguish cancer genes and passenger genes
Source: eLife. 2021 Jan 11;10:e59629. doi: 10.7554/eLife.59629 (PMC7877913; doi:10.7554/eLife.59629)
Supplement: Supplementary file 5. — The table also contains lists of passenger genes (PG_SOf_1SD, PG_SOr2_1SD, PG_SOr3_1SD, PG_SSIf_1SD, PG_SSIr2_1SD, PG_SSIr3_1SD) whose parameters deviate from the mean values by ≤1 SD as well as lists of candidate cancer genes (CG_SOf_1SD, CG_SOr2_1SD, CG_SOr3_1SD, CG_SSIf_1SD, CG_SSIr2_1SD, CG_SSIr3_1SD) whose parameters deviate from the mean values by >1 SD. Table also contains lists of candidate cancer genes (CG_SOf_2SD, CG_SOr2_2SD, CG_SOr3_2SD, CG_SSIf_2SD, CG_SSIr2_2SD, CG_SSIr3_2SD) whose parameters deviate from the mean values by >2 SD as well as lists of passenger genes (PG_SOf_2SD, PG_SOr2_2SD, PG_SOr3_2SD, PG_SSIf_2SD, PG_SSIr2_2SD, PG_SSIr3_2SD) whose parameters deviate from the mean values by <2 SD. Transcripts of OGs (oncogenes) and TSGs (tumor suppressor genes) of the cancer gene list of Vogelstein et al., 2013 are highlighted by brick red and blue backgrounds, respectively. Transcripts of CGC (Cancer Gene Census) genes (Sondka et al., 2018) that do not correspond to OGs or TSGs of the cancer gene list of Vogelstein et al., 2013 are highlighted by yellow background. [file elife-59629-supp5.xlsx]

## Sheet: SO
Gene symbol	fS	fM	fN	rSM	rNM	rNS	rSMN	rMSN	rNSM	Number of 'substitutions only'	PG_SOf_1SD	fS	fM	fN	CG_SOf_1SD	fS	fM	fN	PG_SOf_2SD	fS	fM	fN	CG_SOf_2SD	fS	fM	fN	PG_SOr2_1SD	rSM	rNM	rNS	CG_SOr2_1SD	rSM	rNM	rNS	PG_SOr2_2SD	rSM	rNM	rNS	CG_SO2r_2SD	rSM	rNM	rNS	PG_SOr3_1SD	rSMN	rMSN	rNSM	CG_SOr3_1SD	rSMN	rMSN
APC	0.0392203	0.249178	0.711602	0.157399	2.8558	18.1437	0.0408213	0.331874	2.46743	4258					APC	0.0392203	0.249178	0.711602					APC	0.0392203	0.249178	0.711602					APC	0.157399	2.8558	18.1437					APC	0.157399	18.1437	18.1437					APC	0.0408213	0.331874
NF2	0.0433925	0.392505	0.564103	0.110553	1.43719	13	0.0453608	0.646104	1.29412	507					NF2	0.0433925	0.392505	0.564103					NF2	0.0433925	0.392505	0.564103					NF2	0.110553	1.43719	13					NF2	0.110553	13	13					NF2	0.0453608	0.646104
RB1	0.0442584	0.399522	0.55622	0.110778	1.39222	12.5676	0.0463079	0.665339	1.25337	836					RB1	0.0442584	0.399522	0.55622					RB1	0.0442584	0.399522	0.55622					RB1	0.110778	1.39222	12.5676					RB1	0.110778	12.5676	12.5676					RB1	0.0463079	0.665339
RB1_ENST00000267163	0.0495751	0.413598	0.536827	0.119863	1.29795	10.8286	0.052161	0.705314	1.15902	706					RB1_ENST00000267163	0.0495751	0.413598	0.536827					RB1_ENST00000267163	0.0495751	0.413598	0.536827					RB1_ENST00000267163	0.119863	1.29795	10.8286					RB1_ENST00000267163	0.119863	10.8286	10.8286					RB1_ENST00000267163	0.052161	0.705314
ARID1A	0.0541327	0.474971	0.470896	0.113971	0.991422	8.69892	0.0572308	0.904656	0.889989	1718					ARID1A	0.0541327	0.474971	0.470896					ARID1A	0.0541327	0.474971	0.470896					ARID1A	0.113971	0.991422	8.69892					ARID1A	0.113971	8.69892	8.69892					ARID1A	0.0572308	0.904656
CCR4	0.134831	0.421348	0.44382	0.32	1.05333	3.29167	0.155844	0.728155	0.79798	178					CCR4	0.134831	0.421348	0.44382					CCR4	0.134831	0.421348	0.44382					CCR4	0.32	1.05333	3.29167					CCR4	0.32	3.29167	3.29167					CCR4	0.155844	0.728155
CDKN2A_ENST00000446177	0.0582147	0.554981	0.386805	0.104895	0.69697	6.64444	0.0618132	1.24709	0.630802	773					CDKN2A_ENST00000446177	0.0582147	0.554981	0.386805					CDKN2A_ENST00000446177	0.0582147	0.554981	0.386805					CDKN2A_ENST00000446177	0.104895	0.69697	6.64444					CDKN2A_ENST00000446177	0.104895	6.64444	6.64444					CDKN2A_ENST00000446177	0.0618132	1.24709
NF2_ENST00000403999	0.0503597	0.564748	0.384892	0.089172	0.681529	7.64286	0.0530303	1.29752	0.625731	278					NF2_ENST00000403999	0.0503597	0.564748	0.384892					NF2_ENST00000403999	0.0503597	0.564748	0.384892					NF2_ENST00000403999	0.089172	0.681529	7.64286					NF2_ENST00000403999	0.089172	7.64286	7.64286					NF2_ENST00000403999	0.0530303	1.29752
CDKN2A_ENST00000498124	0.0563565	0.564875	0.378768	0.099768	0.670534	6.72093	0.0597222	1.29819	0.609705	763					CDKN2A_ENST00000498124	0.0563565	0.564875	0.378768					CDKN2A_ENST00000498124	0.0563565	0.564875	0.378768					CDKN2A_ENST00000498124	0.099768	0.670534	6.72093					CDKN2A_ENST00000498124	0.099768	6.72093	6.72093					CDKN2A_ENST00000498124	0.0597222	1.29819
CDKN1B	0.0909091	0.554545	0.354545	0.163934	0.639344	3.9	0.1	1.2449	0.549296	110					CDKN1B	0.0909091	0.554545	0.354545					CDKN1B	0.0909091	0.554545	0.354545					CDKN1B	0.163934	0.639344	3.9					CDKN1B	0.163934	3.9	3.9					CDKN1B	0.1	1.2449
CDKN2A	0.0729167	0.582465	0.344618	0.125186	0.591654	4.72619	0.0786517	1.39501	0.525828	1152					CDKN2A	0.0729167	0.582465	0.344618					CDKN2A	0.0729167	0.582465	0.344618					CDKN2A	0.125186	0.591654	4.72619					CDKN2A	0.125186	4.72619	4.72619					CDKN2A	0.0786517	1.39501
RBM10	0.0760456	0.589354	0.334601	0.129032	0.567742	4.4	0.0823045	1.43519	0.502857	526					RBM10	0.0760456	0.589354	0.334601					RBM10	0.0760456	0.589354	0.334601					RBM10	0.129032	0.567742	4.4					RBM10	0.129032	4.4	4.4					RBM10	0.0823045	1.43519
AMER1	0.0856611	0.582868	0.331471	0.146965	0.56869	3.86957	0.0936864	1.39732	0.495822	537					AMER1	0.0856611	0.582868	0.331471					AMER1	0.0856611	0.582868	0.331471					AMER1	0.146965	0.56869	3.86957					AMER1	0.146965	3.86957	3.86957					AMER1	0.0936864	1.39732
PBRM1	0.0651659	0.61019	0.324645	0.106796	0.532039	4.98182	0.0697085	1.56535	0.480702	844					PBRM1	0.0651659	0.61019	0.324645					PBRM1	0.0651659	0.61019	0.324645					PBRM1	0.106796	0.532039	4.98182					PBRM1	0.106796	4.98182	4.98182					PBRM1	0.0697085	1.56535
TET2	0.0507881	0.632224	0.316988	0.0803324	0.501385	6.24138	0.0535055	1.71905	0.464103	1142					TET2	0.0507881	0.632224	0.316988					TET2	0.0507881	0.632224	0.316988					TET2	0.0803324	0.501385	6.24138					TET2	0.0803324	6.24138	6.24138					TET2	0.0535055	1.71905
PHF6	0.0632911	0.626582	0.310127	0.10101	0.494949	4.9	0.0675676	1.67797	0.449541	158					PHF6	0.0632911	0.626582	0.310127					PHF6	0.0632911	0.626582	0.310127					PHF6	0.10101	0.494949	4.9					PHF6	0.10101	4.9	4.9					PHF6	0.0675676	1.67797
STK11_ENST00000326873	0.0473373	0.64497	0.307692	0.0733945	0.477064	6.5	0.0496894	1.81667	0.444444	338					STK11_ENST00000326873	0.0473373	0.64497	0.307692					STK11_ENST00000326873	0.0473373	0.64497	0.307692					STK11_ENST00000326873	0.0733945	0.477064	6.5					STK11_ENST00000326873	0.0733945	6.5	6.5					STK11_ENST00000326873	0.0496894	1.81667
ARID2	0.0856574	0.609562	0.304781	0.140523	0.5	3.55814	0.0936819	1.56122	0.438395	1004					ARID2	0.0856574	0.609562	0.304781					ARID2	0.0856574	0.609562	0.304781					ARID2	0.140523	0.5	3.55814					ARID2	0.140523	3.55814	3.55814					ARID2	0.0936819	1.56122
TET2_ENST00000305737	0.0787234	0.617021	0.304255	0.127586	0.493103	3.86486	0.0854503	1.61111	0.437309	470					TET2_ENST00000305737	0.0787234	0.617021	0.304255					TET2_ENST00000305737	0.0787234	0.617021	0.304255					TET2_ENST00000305737	0.127586	0.493103	3.86486					TET2_ENST00000305737	0.127586	3.86486	3.86486					TET2_ENST00000305737	0.0854503	1.61111
NF1	0.101621	0.597257	0.301122	0.170146	0.504175	2.96319	0.113116	1.48297	0.430865	1604					NF1	0.101621	0.597257	0.301122					NF1	0.101621	0.597257	0.301122					NF1	0.170146	0.504175	2.96319					NF1	0.170146	2.96319	2.96319					NF1	0.113116	1.48297
STK11	0.064877	0.635347	0.299776	0.102113	0.471831	4.62069	0.069378	1.74233	0.428115	447					STK11	0.064877	0.635347	0.299776					STK11	0.064877	0.635347	0.299776					STK11	0.102113	0.471831	4.62069					STK11	0.102113	4.62069	4.62069					STK11	0.069378	1.74233
PBRM1_ENST00000356770	0.0734745	0.627646	0.298879	0.117063	0.47619	4.0678	0.0793011	1.68562	0.426288	803					PBRM1_ENST00000356770	0.0734745	0.627646	0.298879					PBRM1_ENST00000356770	0.0734745	0.627646	0.298879					PBRM1_ENST00000356770	0.117063	0.47619	4.0678					PBRM1_ENST00000356770	0.117063	4.0678	4.0678					PBRM1_ENST00000356770	0.0793011	1.68562
PBRM1_ENST00000296302	0.0722611	0.629371	0.298368	0.114815	0.474074	4.12903	0.0778894	1.69811	0.425249	858					PBRM1_ENST00000296302	0.0722611	0.629371	0.298368					PBRM1_ENST00000296302	0.0722611	0.629371	0.298368					PBRM1_ENST00000296302	0.114815	0.474074	4.12903					PBRM1_ENST00000296302	0.114815	4.12903	4.12903					PBRM1_ENST00000296302	0.0778894	1.69811
PPM1D	0.110132	0.594714	0.295154	0.185185	0.496296	2.68	0.123762	1.46739	0.41875	227					PPM1D	0.110132	0.594714	0.295154					PPM1D	0.110132	0.594714	0.295154					PPM1D	0.185185	0.496296	2.68					PPM1D	0.185185	2.68	2.68					PPM1D	0.123762	1.46739
CCR7	0.214286	0.492063	0.293651	0.435484	0.596774	1.37037	0.272727	0.96875	0.41573	126					CCR7	0.214286	0.492063	0.293651					CCR7	0.214286	0.492063	0.293651					CCR7	0.435484	0.596774	1.37037					CCR7	0.435484	1.37037	1.37037					CCR7	0.272727	0.96875
NF1_ENST00000444181	0.0861244	0.626794	0.287081	0.137405	0.458015	3.33333	0.0942408	1.67949	0.402685	209					NF1_ENST00000444181	0.0861244	0.626794	0.287081					NF1_ENST00000444181	0.0861244	0.626794	0.287081					NF1_ENST00000444181	0.137405	0.458015	3.33333					NF1_ENST00000444181	0.137405	3.33333	3.33333					NF1_ENST00000444181	0.0942408	1.67949
KDM6A	0.127714	0.586207	0.286079	0.217865	0.488017	2.24	0.146413	1.41667	0.400716	783					KDM6A	0.127714	0.586207	0.286079					KDM6A	0.127714	0.586207	0.286079					KDM6A	0.217865	0.488017	2.24					KDM6A	0.217865	2.24	2.24					KDM6A	0.146413	1.41667
PHF6_ENST00000332070	0.0787402	0.637795	0.283465	0.123457	0.444444	3.6	0.0854701	1.76087	0.395604	127					PHF6_ENST00000332070	0.0787402	0.637795	0.283465					PHF6_ENST00000332070	0.0787402	0.637795	0.283465					PHF6_ENST00000332070	0.123457	0.444444	3.6					PHF6_ENST00000332070	0.123457	3.6	3.6					PHF6_ENST00000332070	0.0854701	1.76087
PTEN	0.0194772	0.697078	0.283444	0.0279412	0.406618	14.5526	0.0198641	2.30118	0.395565	1951					PTEN	0.0194772	0.697078	0.283444					PTEN	0.0194772	0.697078	0.283444					PTEN	0.0279412	0.406618	14.5526					PTEN	0.0279412	14.5526	14.5526					PTEN	0.0198641	2.30118
FAM123B_ENST00000330258	0.0955519	0.621087	0.283361	0.153846	0.456233	2.96552	0.105647	1.63913	0.395402	607					FAM123B_ENST00000330258	0.0955519	0.621087	0.283361					FAM123B_ENST00000330258	0.0955519	0.621087	0.283361					FAM123B_ENST00000330258	0.153846	0.456233	2.96552					FAM123B_ENST00000330258	0.153846	2.96552	2.96552					FAM123B_ENST00000330258	0.105647	1.63913
HLA-A_ENST00000376806	0.0896552	0.634483	0.275862	0.141304	0.434783	3.07692	0.0984848	1.73585	0.380952	145					HLA-A_ENST00000376806	0.0896552	0.634483	0.275862					HLA-A_ENST00000376806	0.0896552	0.634483	0.275862					HLA-A_ENST00000376806	0.141304	0.434783	3.07692					HLA-A_ENST00000376806	0.141304	3.07692	3.07692					HLA-A_ENST00000376806	0.0984848	1.73585
SMAD2	0.05625	0.66875	0.275	0.0841121	0.411215	4.88889	0.0596026	2.01887	0.37931	320					SMAD2	0.05625	0.66875	0.275					SMAD2	0.05625	0.66875	0.275					SMAD2	0.0841121	0.411215	4.88889					SMAD2	0.0841121	4.88889	4.88889					SMAD2	0.0596026	2.01887
NF1_ENST00000358273	0.105449	0.619958	0.274593	0.170091	0.442922	2.60403	0.11788	1.63128	0.378537	1413					NF1_ENST00000358273	0.105449	0.619958	0.274593					NF1_ENST00000358273	0.105449	0.619958	0.274593					NF1_ENST00000358273	0.170091	0.442922	2.60403					NF1_ENST00000358273	0.170091	2.60403	2.60403					NF1_ENST00000358273	0.11788	1.63128
HLA-A	0.122807	0.608187	0.269006	0.201923	0.442308	2.19048	0.14	1.55224	0.368	171					HLA-A	0.122807	0.608187	0.269006					HLA-A	0.122807	0.608187	0.269006					HLA-A	0.201923	0.442308	2.19048					HLA-A	0.201923	2.19048	2.19048					HLA-A	0.14	1.55224
SETD2_ENST00000409792	0.0682243	0.670093	0.261682	0.101813	0.390516	3.83562	0.0732197	2.03116	0.35443	1070					SETD2_ENST00000409792	0.0682243	0.670093	0.261682					SETD2_ENST00000409792	0.0682243	0.670093	0.261682					SETD2_ENST00000409792	0.101813	0.390516	3.83562					SETD2_ENST00000409792	0.101813	3.83562	3.83562					SETD2_ENST00000409792	0.0732197	2.03116
KDM6A_ENST00000382899	0.151297	0.587896	0.260807	0.257353	0.443627	1.72381	0.178268	1.42657	0.352827	694					KDM6A_ENST00000382899	0.151297	0.587896	0.260807					KDM6A_ENST00000382899	0.151297	0.587896	0.260807					KDM6A_ENST00000382899	0.257353	0.443627	1.72381					KDM6A_ENST00000382899	0.257353	1.72381	1.72381					KDM6A_ENST00000382899	0.178268	1.42657
SETD2	0.0634921	0.67619	0.260317	0.0938967	0.384977	4.1	0.0677966	2.08824	0.351931	945					SETD2	0.0634921	0.67619	0.260317					SETD2	0.0634921	0.67619	0.260317					SETD2	0.0938967	0.384977	4.1					SETD2	0.0938967	4.1	4.1					SETD2	0.0677966	2.08824
KDM6A_ENST00000377967	0.148359	0.592011	0.259629	0.250602	0.438554	1.75	0.174204	1.45105	0.350674	701					KDM6A_ENST00000377967	0.148359	0.592011	0.259629					KDM6A_ENST00000377967	0.148359	0.592011	0.259629					KDM6A_ENST00000377967	0.250602	0.438554	1.75					KDM6A_ENST00000377967	0.250602	1.75	1.75					KDM6A_ENST00000377967	0.174204	1.45105
ASXL1	0.121298	0.619182	0.25952	0.1959	0.419134	2.13953	0.138042	1.62593	0.350476	709					ASXL1	0.121298	0.619182	0.25952					ASXL1	0.121298	0.619182	0.25952					ASXL1	0.1959	0.419134	2.13953					ASXL1	0.1959	2.13953	2.13953					ASXL1	0.138042	1.62593
BAP1	0.0681818	0.673077	0.258741	0.101299	0.384416	3.79487	0.0731707	2.05882	0.349057	572					BAP1	0.0681818	0.673077	0.258741					BAP1	0.0681818	0.673077	0.258741					BAP1	0.101299	0.384416	3.79487					BAP1	0.101299	3.79487	3.79487					BAP1	0.0731707	2.05882
SOX9	0.106667	0.636667	0.256667	0.167539	0.403141	2.40625	0.119403	1.75229	0.345291	300					SOX9	0.106667	0.636667	0.256667					SOX9	0.106667	0.636667	0.256667					SOX9	0.167539	0.403141	2.40625					SOX9	0.167539	2.40625	2.40625					SOX9	0.119403	1.75229
B2M	0.0628019	0.68599	0.251208	0.0915493	0.366197	4	0.0670103	2.18462	0.335484	207					B2M	0.0628019	0.68599	0.251208					B2M	0.0628019	0.68599	0.251208					B2M	0.0915493	0.366197	4					B2M	0.0915493	4	4					B2M	0.0670103	2.18462
STAG2	0.0940299	0.655224	0.250746	0.143508	0.382688	2.66667	0.103789	1.90043	0.334661	670					STAG2	0.0940299	0.655224	0.250746					STAG2	0.0940299	0.655224	0.250746					STAG2	0.143508	0.382688	2.66667					STAG2	0.143508	2.66667	2.66667					STAG2	0.103789	1.90043
DUSP16	0.262821	0.487179	0.25	0.539474	0.513158	0.95122	0.356522	0.95	0.333333	156					DUSP16	0.262821	0.487179	0.25					DUSP16	0.262821	0.487179	0.25					DUSP16	0.539474	0.513158	0.95122					DUSP16	0.539474	0.95122	0.95122					DUSP16	0.356522	0.95
PIK3R1_ENST00000320694	0.0412979	0.713864	0.244838	0.0578512	0.342975	5.92857	0.0430769	2.49485	0.324219	339					PIK3R1_ENST00000320694	0.0412979	0.713864	0.244838					PIK3R1_ENST00000320694	0.0412979	0.713864	0.244838					PIK3R1_ENST00000320694	0.0578512	0.342975	5.92857					PIK3R1_ENST00000320694	0.0578512	5.92857	5.92857					PIK3R1_ENST00000320694	0.0430769	2.49485
PIK3R1_ENST00000336483	0.0410557	0.715543	0.243402	0.057377	0.340164	5.92857	0.0428135	2.51546	0.321705	341					PIK3R1_ENST00000336483	0.0410557	0.715543	0.243402					PIK3R1_ENST00000336483	0.0410557	0.715543	0.243402					PIK3R1_ENST00000336483	0.057377	0.340164	5.92857					PIK3R1_ENST00000336483	0.057377	5.92857	5.92857					PIK3R1_ENST00000336483	0.0428135	2.51546
PIK3R1	0.0573248	0.700637	0.242038	0.0818182	0.345455	4.22222	0.0608108	2.34043	0.319328	471					PIK3R1	0.0573248	0.700637	0.242038					PIK3R1	0.0573248	0.700637	0.242038					PIK3R1	0.0818182	0.345455	4.22222					PIK3R1	0.0818182	4.22222	4.22222					PIK3R1	0.0608108	2.34043
ZNF276	0.22695	0.539007	0.234043	0.421053	0.434211	1.03125	0.293578	1.16923	0.305556	141					ZNF276	0.22695	0.539007	0.234043					ZNF276	0.22695	0.539007	0.234043					ZNF276	0.421053	0.434211	1.03125					ZNF276	0.421053	1.03125	1.03125					ZNF276	0.293578	1.16923
STAG2_ENST00000218089	0.0913462	0.674679	0.233974	0.135392	0.346793	2.5614	0.100529	2.07389	0.305439	624					STAG2_ENST00000218089	0.0913462	0.674679	0.233974					STAG2_ENST00000218089	0.0913462	0.674679	0.233974					STAG2_ENST00000218089	0.135392	0.346793	2.5614					STAG2_ENST00000218089	0.135392	2.5614	2.5614					STAG2_ENST00000218089	0.100529	2.07389
CDH1	0.11042	0.656299	0.233281	0.168246	0.35545	2.11268	0.124126	1.9095	0.30426	643					CDH1	0.11042	0.656299	0.233281					CDH1	0.11042	0.656299	0.233281					CDH1	0.168246	0.35545	2.11268					CDH1	0.168246	2.11268	2.11268					CDH1	0.124126	1.9095
CASP8	0.056338	0.711268	0.232394	0.0792079	0.326733	4.125	0.0597015	2.46341	0.302752	426					CASP8	0.056338	0.711268	0.232394					CASP8	0.056338	0.711268	0.232394					CASP8	0.0792079	0.326733	4.125					CASP8	0.0792079	4.125	4.125					CASP8	0.0597015	2.46341
CASP8_ENST00000264275	0.0522193	0.715405	0.232376	0.0729927	0.324818	4.45	0.0550964	2.51376	0.302721	383					CASP8_ENST00000264275	0.0522193	0.715405	0.232376					CASP8_ENST00000264275	0.0522193	0.715405	0.232376					CASP8_ENST00000264275	0.0729927	0.324818	4.45					CASP8_ENST00000264275	0.0729927	4.45	4.45					CASP8_ENST00000264275	0.0550964	2.51376
CBFB_ENST00000412916	0.08	0.688	0.232	0.116279	0.337209	2.9	0.0869565	2.20513	0.302083	125					CBFB_ENST00000412916	0.08	0.688	0.232					CBFB_ENST00000412916	0.08	0.688	0.232					CBFB_ENST00000412916	0.116279	0.337209	2.9					CBFB_ENST00000412916	0.116279	2.9	2.9					CBFB_ENST00000412916	0.0869565	2.20513
ASXL1_ENST00000306058	0.126214	0.642395	0.231392	0.196474	0.360202	1.83333	0.144444	1.79638	0.301053	618					ASXL1_ENST00000306058	0.126214	0.642395	0.231392					ASXL1_ENST00000306058	0.126214	0.642395	0.231392					ASXL1_ENST00000306058	0.196474	0.360202	1.83333					ASXL1_ENST00000306058	0.196474	1.83333	1.83333					ASXL1_ENST00000306058	0.144444	1.79638
RNF43	0.0889831	0.680085	0.230932	0.130841	0.339564	2.59524	0.0976744	2.12583	0.300275	472					RNF43	0.0889831	0.680085	0.230932					RNF43	0.0889831	0.680085	0.230932					RNF43	0.130841	0.339564	2.59524					RNF43	0.130841	2.59524	2.59524					RNF43	0.0976744	2.12583
AXIN1	0.109091	0.66	0.230909	0.165289	0.349862	2.11667	0.122449	1.94118	0.300236	550					AXIN1	0.109091	0.66	0.230909					AXIN1	0.109091	0.66	0.230909					AXIN1	0.165289	0.349862	2.11667					AXIN1	0.165289	2.11667	2.11667					AXIN1	0.122449	1.94118
SMAD4_ENST00000452201	0.0629371	0.706294	0.230769	0.0891089	0.326733	3.66667	0.0671642	2.40476	0.3	143					SMAD4_ENST00000452201	0.0629371	0.706294	0.230769					SMAD4_ENST00000452201	0.0629371	0.706294	0.230769					SMAD4_ENST00000452201	0.0891089	0.326733	3.66667					SMAD4_ENST00000452201	0.0891089	3.66667	3.66667					SMAD4_ENST00000452201	0.0671642	2.40476
B3GALT1	0.210526	0.559211	0.230263	0.376471	0.411765	1.09375	0.266667	1.26866	0.299145	152					B3GALT1	0.210526	0.559211	0.230263					B3GALT1	0.210526	0.559211	0.230263					B3GALT1	0.376471	0.411765	1.09375					B3GALT1	0.376471	1.09375	1.09375					B3GALT1	0.266667	1.26866
CASP8_ENST00000358485	0.047619	0.72381	0.228571	0.0657895	0.315789	4.8	0.05	2.62069	0.296296	420					CASP8_ENST00000358485	0.047619	0.72381	0.228571					CASP8_ENST00000358485	0.047619	0.72381	0.228571					CASP8_ENST00000358485	0.0657895	0.315789	4.8					CASP8_ENST00000358485	0.0657895	4.8	4.8					CASP8_ENST00000358485	0.05	2.62069
MSH2	0.122563	0.649025	0.228412	0.188841	0.351931	1.86364	0.139683	1.84921	0.296029	359					MSH2	0.122563	0.649025	0.228412					MSH2	0.122563	0.649025	0.228412					MSH2	0.188841	0.351931	1.86364					MSH2	0.188841	1.86364	1.86364					MSH2	0.139683	1.84921
CBFB_ENST00000290858	0.0956522	0.678261	0.226087	0.141026	0.333333	2.36364	0.105769	2.10811	0.292135	115					CBFB_ENST00000290858	0.0956522	0.678261	0.226087					CBFB_ENST00000290858	0.0956522	0.678261	0.226087					CBFB_ENST00000290858	0.141026	0.333333	2.36364					CBFB_ENST00000290858	0.141026	2.36364	2.36364					CBFB_ENST00000290858	0.105769	2.10811
KMT2D	0.112883	0.661759	0.225358	0.170581	0.340544	1.99638	0.127248	1.95647	0.290919	2445					KMT2D	0.112883	0.661759	0.225358					KMT2D	0.112883	0.661759	0.225358					KMT2D	0.170581	0.340544	1.99638					KMT2D	0.170581	1.99638	1.99638					KMT2D	0.127248	1.95647
ZNF276_ENST00000443381	0.209459	0.567568	0.222973	0.369048	0.392857	1.06452	0.264957	1.3125	0.286957	148					ZNF276_ENST00000443381	0.209459	0.567568	0.222973					ZNF276_ENST00000443381	0.209459	0.567568	0.222973					ZNF276_ENST00000443381	0.369048	0.392857	1.06452					ZNF276_ENST00000443381	0.369048	1.06452	1.06452					ZNF276_ENST00000443381	0.264957	1.3125
CDKN1A	0.103704	0.674074	0.222222	0.153846	0.32967	2.14286	0.115702	2.06818	0.285714	135					CDKN1A	0.103704	0.674074	0.222222					CDKN1A	0.103704	0.674074	0.222222					CDKN1A	0.153846	0.32967	2.14286					CDKN1A	0.153846	2.14286	2.14286					CDKN1A	0.115702	2.06818
MEN1	0.114583	0.664062	0.221354	0.172549	0.333333	1.93182	0.129412	1.97674	0.284281	384					MEN1	0.114583	0.664062	0.221354					MEN1	0.114583	0.664062	0.221354					MEN1	0.172549	0.333333	1.93182					MEN1	0.172549	1.93182	1.93182					MEN1	0.129412	1.97674
WT1	0.102689	0.677262	0.220049	0.151625	0.32491	2.14286	0.114441	2.09848	0.282132	409					WT1	0.102689	0.677262	0.220049					WT1	0.102689	0.677262	0.220049					WT1	0.151625	0.32491	2.14286					WT1	0.151625	2.14286	2.14286					WT1	0.114441	2.09848
B2M_ENST00000544417	0.0941176	0.688235	0.217647	0.136752	0.316239	2.3125	0.103896	2.20755	0.278195	170					B2M_ENST00000544417	0.0941176	0.688235	0.217647					B2M_ENST00000544417	0.0941176	0.688235	0.217647					B2M_ENST00000544417	0.136752	0.316239	2.3125					B2M_ENST00000544417	0.136752	2.3125	2.3125					B2M_ENST00000544417	0.103896	2.20755
VHL	0.0462606	0.736315	0.217425	0.0628272	0.295288	4.7	0.0485044	2.7924	0.277833	1297					VHL	0.0462606	0.736315	0.217425					VHL	0.0462606	0.736315	0.217425					VHL	0.0628272	0.295288	4.7					VHL	0.0628272	4.7	4.7					VHL	0.0485044	2.7924
RASA1_ENST00000456692	0.0791557	0.704485	0.216359	0.11236	0.307116	2.73333	0.0859599	2.38393	0.276094	379					RASA1_ENST00000456692	0.0791557	0.704485	0.216359					RASA1_ENST00000456692	0.0791557	0.704485	0.216359					RASA1_ENST00000456692	0.11236	0.307116	2.73333					RASA1_ENST00000456692	0.11236	2.73333	2.73333					RASA1_ENST00000456692	0.0859599	2.38393
MLL2_ENST00000301067	0.122057	0.662088	0.215856	0.184351	0.326023	1.76849	0.139025	1.95935	0.275275	2548					MLL2_ENST00000301067	0.122057	0.662088	0.215856					MLL2_ENST00000301067	0.122057	0.662088	0.215856					MLL2_ENST00000301067	0.184351	0.326023	1.76849					MLL2_ENST00000301067	0.184351	1.76849	1.76849					MLL2_ENST00000301067	0.139025	1.95935
BRD7	0.179641	0.60479	0.215569	0.29703	0.356436	1.2	0.218978	1.5303	0.274809	167					BRD7	0.179641	0.60479	0.215569					BRD7	0.179641	0.60479	0.215569					BRD7	0.29703	0.356436	1.2					BRD7	0.29703	1.2	1.2					BRD7	0.218978	1.5303
SMAD4	0.0246599	0.761905	0.213435	0.0323661	0.280134	8.65517	0.0252833	3.2	0.271351	1176					SMAD4	0.0246599	0.761905	0.213435					SMAD4	0.0246599	0.761905	0.213435					SMAD4	0.0323661	0.280134	8.65517					SMAD4	0.0323661	8.65517	8.65517					SMAD4	0.0252833	3.2
TP53_ENST00000414315	0.00459301	0.784129	0.211278	0.00585747	0.269444	46	0.0046142	3.63239	0.267874	3919					TP53_ENST00000414315	0.00459301	0.784129	0.211278					TP53_ENST00000414315	0.00459301	0.784129	0.211278					TP53_ENST00000414315	0.00585747	0.269444	46					TP53_ENST00000414315	0.00585747	46	46					TP53_ENST00000414315	0.0046142	3.63239
GIGYF2_ENST00000452341	0.173913	0.614907	0.21118	0.282828	0.343434	1.21429	0.210526	1.59677	0.267717	161					GIGYF2_ENST00000452341	0.173913	0.614907	0.21118					GIGYF2_ENST00000452341	0.173913	0.614907	0.21118					GIGYF2_ENST00000452341	0.282828	0.343434	1.21429					GIGYF2_ENST00000452341	0.282828	1.21429	1.21429					GIGYF2_ENST00000452341	0.210526	1.59677
CDKN1A_ENST00000448526	0.120968	0.669355	0.209677	0.180723	0.313253	1.73333	0.137615	2.02439	0.265306	124					CDKN1A_ENST00000448526	0.120968	0.669355	0.209677					CDKN1A_ENST00000448526	0.120968	0.669355	0.209677					CDKN1A_ENST00000448526	0.180723	0.313253	1.73333					CDKN1A_ENST00000448526	0.180723	1.73333	1.73333					CDKN1A_ENST00000448526	0.137615	2.02439
RASA1	0.0758294	0.718009	0.206161	0.105611	0.287129	2.71875	0.0820513	2.54622	0.259701	422					RASA1	0.0758294	0.718009	0.206161					RASA1	0.0758294	0.718009	0.206161					RASA1	0.105611	0.287129	2.71875					RASA1	0.105611	2.71875	2.71875					RASA1	0.0820513	2.54622
SMARCB1	0.103943	0.691756	0.204301	0.150259	0.295337	1.96552	0.116	2.24419	0.256757	279					SMARCB1	0.103943	0.691756	0.204301					SMARCB1	0.103943	0.691756	0.204301					SMARCB1	0.150259	0.295337	1.96552					SMARCB1	0.150259	1.96552	1.96552					SMARCB1	0.116	2.24419
TSC1_ENST00000403810	0.0985915	0.697183	0.204225	0.141414	0.292929	2.07143	0.109375	2.30233	0.256637	142					TSC1_ENST00000403810	0.0985915	0.697183	0.204225					TSC1_ENST00000403810	0.0985915	0.697183	0.204225					TSC1_ENST00000403810	0.141414	0.292929	2.07143					TSC1_ENST00000403810	0.141414	2.07143	2.07143					TSC1_ENST00000403810	0.109375	2.30233
ZNF750	0.204167	0.595833	0.2	0.342657	0.335664	0.979592	0.256545	1.47423	0.25	240					ZNF750	0.204167	0.595833	0.2					ZNF750	0.204167	0.595833	0.2					ZNF750	0.342657	0.335664	0.979592					ZNF750	0.342657	0.979592	0.979592					ZNF750	0.256545	1.47423
SMARCD2_ENST00000323347	0.2	0.6	0.2	0.333333	0.333333	1	0.25	1.5	0.25	100					SMARCD2_ENST00000323347	0.2	0.6	0.2					SMARCD2_ENST00000323347	0.2	0.6	0.2					SMARCD2_ENST00000323347	0.333333	0.333333	1					SMARCD2_ENST00000323347	0.333333	1	1					SMARCD2_ENST00000323347	0.25	1.5
SMARCD2	0.173913	0.626087	0.2	0.277778	0.319444	1.15	0.210526	1.67442	0.25	115					SMARCD2	0.173913	0.626087	0.2					SMARCD2	0.173913	0.626087	0.2					SMARCD2	0.277778	0.319444	1.15					SMARCD2	0.277778	1.15	1.15					SMARCD2	0.210526	1.67442
ATRX	0.0777027	0.723818	0.19848	0.107351	0.274212	2.55435	0.0842491	2.6208	0.247629	1184					ATRX	0.0777027	0.723818	0.19848					ATRX	0.0777027	0.723818	0.19848					ATRX	0.107351	0.274212	2.55435					ATRX	0.107351	2.55435	2.55435					ATRX	0.0842491	2.6208
KMT2C	0.111469	0.690926	0.197605	0.161333	0.286	1.77273	0.125454	2.23547	0.246269	2171					KMT2C	0.111469	0.690926	0.197605					KMT2C	0.111469	0.690926	0.197605					KMT2C	0.161333	0.286	1.77273					KMT2C	0.161333	1.77273	1.77273					KMT2C	0.125454	2.23547
ATRX_ENST00000373344	0.0786219	0.726148	0.19523	0.108273	0.268856	2.48315	0.0853308	2.65161	0.242591	1132					ATRX_ENST00000373344	0.0786219	0.726148	0.19523					ATRX_ENST00000373344	0.0786219	0.726148	0.19523					ATRX_ENST00000373344	0.108273	0.268856	2.48315					ATRX_ENST00000373344	0.108273	2.48315	2.48315					ATRX_ENST00000373344	0.0853308	2.65161
WT1_ENST00000379079	0.100372	0.70632	0.193309	0.142105	0.273684	1.92593	0.11157	2.40506	0.239631	269					WT1_ENST00000379079	0.100372	0.70632	0.193309					WT1_ENST00000379079	0.100372	0.70632	0.193309					WT1_ENST00000379079	0.142105	0.273684	1.92593					WT1_ENST00000379079	0.142105	1.92593	1.92593					WT1_ENST00000379079	0.11157	2.40506
MLL3_ENST00000355193	0.112722	0.694107	0.193171	0.162399	0.278302	1.71369	0.127043	2.26911	0.23942	2138					MLL3_ENST00000355193	0.112722	0.694107	0.193171					MLL3_ENST00000355193	0.112722	0.694107	0.193171					MLL3_ENST00000355193	0.162399	0.278302	1.71369					MLL3_ENST00000355193	0.162399	1.71369	1.71369					MLL3_ENST00000355193	0.127043	2.26911
SMAD2_ENST00000591214	0.0751174	0.732394	0.192488	0.102564	0.262821	2.5625	0.0812183	2.73684	0.238372	213					SMAD2_ENST00000591214	0.0751174	0.732394	0.192488					SMAD2_ENST00000591214	0.0751174	0.732394	0.192488					SMAD2_ENST00000591214	0.102564	0.262821	2.5625					SMAD2_ENST00000591214	0.102564	2.5625	2.5625					SMAD2_ENST00000591214	0.0812183	2.73684
DYRK1A_ENST00000338785	0.132353	0.676471	0.191176	0.195652	0.282609	1.44444	0.152542	2.09091	0.236364	136					DYRK1A_ENST00000338785	0.132353	0.676471	0.191176					DYRK1A_ENST00000338785	0.132353	0.676471	0.191176					DYRK1A_ENST00000338785	0.195652	0.282609	1.44444					DYRK1A_ENST00000338785	0.195652	1.44444	1.44444					DYRK1A_ENST00000338785	0.152542	2.09091
PSIP1_ENST00000380733	0.162162	0.648649	0.189189	0.25	0.291667	1.16667	0.193548	1.84615	0.233333	111					PSIP1_ENST00000380733	0.162162	0.648649	0.189189					PSIP1_ENST00000380733	0.162162	0.648649	0.189189					PSIP1_ENST00000380733	0.25	0.291667	1.16667					PSIP1_ENST00000380733	0.25	1.16667	1.16667					PSIP1_ENST00000380733	0.193548	1.84615
SPRED1	0.169811	0.641509	0.188679	0.264706	0.294118	1.11111	0.204545	1.78947	0.232558	106					SPRED1	0.169811	0.641509	0.188679					SPRED1	0.169811	0.641509	0.188679					SPRED1	0.264706	0.294118	1.11111					SPRED1	0.264706	1.11111	1.11111					SPRED1	0.204545	1.78947
MLH1	0.129032	0.683871	0.187097	0.188679	0.273585	1.45	0.148148	2.16327	0.230159	310					MLH1	0.129032	0.683871	0.187097					MLH1	0.129032	0.683871	0.187097					MLH1	0.188679	0.273585	1.45					MLH1	0.188679	1.45	1.45					MLH1	0.148148	2.16327
NCOR1_ENST00000436828	0.0542636	0.75969	0.186047	0.0714286	0.244898	3.42857	0.057377	3.16129	0.228571	129					NCOR1_ENST00000436828	0.0542636	0.75969	0.186047					NCOR1_ENST00000436828	0.0542636	0.75969	0.186047					NCOR1_ENST00000436828	0.0714286	0.244898	3.42857					NCOR1_ENST00000436828	0.0714286	3.42857	3.42857					NCOR1_ENST00000436828	0.057377	3.16129
ACVR2A	0.126582	0.687764	0.185654	0.184049	0.269939	1.46667	0.144928	2.2027	0.227979	237					ACVR2A	0.126582	0.687764	0.185654					ACVR2A	0.126582	0.687764	0.185654					ACVR2A	0.184049	0.269939	1.46667					ACVR2A	0.184049	1.46667	1.46667					ACVR2A	0.144928	2.2027
CSNK2A1	0.141667	0.675	0.183333	0.209877	0.271605	1.29412	0.165049	2.07692	0.22449	120					CSNK2A1	0.141667	0.675	0.183333					CSNK2A1	0.141667	0.675	0.183333					CSNK2A1	0.209877	0.271605	1.29412					CSNK2A1	0.209877	1.29412	1.29412					CSNK2A1	0.165049	2.07692
CYLD	0.183036	0.633929	0.183036	0.288732	0.288732	1	0.224044	1.73171	0.224044	224					CYLD	0.183036	0.633929	0.183036					CYLD	0.183036	0.633929	0.183036					CYLD	0.288732	0.288732	1					CYLD	0.288732	1	1					CYLD	0.224044	1.73171
ING1_ENST00000338450	0.2	0.617391	0.182609	0.323944	0.295775	0.913043	0.25	1.61364	0.223404	115					ING1_ENST00000338450	0.2	0.617391	0.182609					ING1_ENST00000338450	0.2	0.617391	0.182609					ING1_ENST00000338450	0.323944	0.295775	0.913043					ING1_ENST00000338450	0.323944	0.913043	0.913043					ING1_ENST00000338450	0.25	1.61364
USP45	0.138686	0.678832	0.182482	0.204301	0.268817	1.31579	0.161017	2.11364	0.223214	137					USP45	0.138686	0.678832	0.182482					USP45	0.138686	0.678832	0.182482					USP45	0.204301	0.268817	1.31579					USP45	0.204301	1.31579	1.31579					USP45	0.161017	2.11364
TCF7L2_ENST00000355717	0.157191	0.662207	0.180602	0.237374	0.272727	1.14894	0.186508	1.9604	0.220408	299					TCF7L2_ENST00000355717	0.157191	0.662207	0.180602					TCF7L2_ENST00000355717	0.157191	0.662207	0.180602					TCF7L2_ENST00000355717	0.237374	0.272727	1.14894					TCF7L2_ENST00000355717	0.237374	1.14894	1.14894					TCF7L2_ENST00000355717	0.186508	1.9604
TCF7L2_ENST00000352065	0.097561	0.721951	0.180488	0.135135	0.25	1.85	0.108108	2.59649	0.220238	205					TCF7L2_ENST00000352065	0.097561	0.721951	0.180488					TCF7L2_ENST00000352065	0.097561	0.721951	0.180488					TCF7L2_ENST00000352065	0.135135	0.25	1.85					TCF7L2_ENST00000352065	0.135135	1.85	1.85					TCF7L2_ENST00000352065	0.108108	2.59649
CCDC66	0.111111	0.709402	0.179487	0.156627	0.253012	1.61538	0.125	2.44118	0.21875	117					CCDC66	0.111111	0.709402	0.179487					CCDC66	0.111111	0.709402	0.179487					CCDC66	0.156627	0.253012	1.61538					CCDC66	0.156627	1.61538	1.61538					CCDC66	0.125	2.44118
MGA	0.138286	0.682286	0.179429	0.20268	0.262982	1.29752	0.160477	2.14748	0.218663	875					MGA	0.138286	0.682286	0.179429					MGA	0.138286	0.682286	0.179429					MGA	0.20268	0.262982	1.29752					MGA	0.20268	1.29752	1.29752					MGA	0.160477	2.14748
GIGYF2	0.159091	0.662338	0.178571	0.240196	0.269608	1.12245	0.189189	1.96154	0.217391	308					GIGYF2	0.159091	0.662338	0.178571					GIGYF2	0.159091	0.662338	0.178571					GIGYF2	0.240196	0.269608	1.12245					GIGYF2	0.240196	1.12245	1.12245					GIGYF2	0.189189	1.96154
WT1_ENST00000332351	0.103152	0.719198	0.17765	0.143426	0.247012	1.72222	0.115016	2.56122	0.216028	349					WT1_ENST00000332351	0.103152	0.719198	0.17765					WT1_ENST00000332351	0.103152	0.719198	0.17765					WT1_ENST00000332351	0.143426	0.247012	1.72222					WT1_ENST00000332351	0.143426	1.72222	1.72222					WT1_ENST00000332351	0.115016	2.56122
MAP3K1_ENST00000399503	0.094162	0.728814	0.177024	0.129199	0.242894	1.88	0.10395	2.6875	0.215103	531					MAP3K1_ENST00000399503	0.094162	0.728814	0.177024					MAP3K1_ENST00000399503	0.094162	0.728814	0.177024					MAP3K1_ENST00000399503	0.129199	0.242894	1.88					MAP3K1_ENST00000399503	0.129199	1.88	1.88					MAP3K1_ENST00000399503	0.10395	2.6875
LUC7L2	0.106195	0.716814	0.176991	0.148148	0.246914	1.66667	0.118812	2.53125	0.215054	113					LUC7L2	0.106195	0.716814	0.176991					LUC7L2	0.106195	0.716814	0.176991					LUC7L2	0.148148	0.246914	1.66667					LUC7L2	0.148148	1.66667	1.66667					LUC7L2	0.118812	2.53125
MAP2K4	0.0802469	0.743827	0.175926	0.107884	0.236515	2.19231	0.0872483	2.90361	0.213483	324					MAP2K4	0.0802469	0.743827	0.175926					MAP2K4	0.0802469	0.743827	0.175926					MAP2K4	0.107884	0.236515	2.19231					MAP2K4	0.107884	2.19231	2.19231					MAP2K4	0.0872483	2.90361
FUBP1_ENST00000436586	0.140351	0.684211	0.175439	0.205128	0.25641	1.25	0.163265	2.16667	0.212766	228					FUBP1_ENST00000436586	0.140351	0.684211	0.175439					FUBP1_ENST00000436586	0.140351	0.684211	0.175439					FUBP1_ENST00000436586	0.205128	0.25641	1.25					FUBP1_ENST00000436586	0.205128	1.25	1.25					FUBP1_ENST00000436586	0.163265	2.16667
FUBP1_ENST00000370767	0.139013	0.686099	0.174888	0.202614	0.254902	1.25806	0.161458	2.18571	0.211957	223					FUBP1_ENST00000370767	0.139013	0.686099	0.174888					FUBP1_ENST00000370767	0.139013	0.686099	0.174888					FUBP1_ENST00000370767	0.202614	0.254902	1.25806					FUBP1_ENST00000370767	0.202614	1.25806	1.25806					FUBP1_ENST00000370767	0.161458	2.18571
CTCF	0.0833333	0.74187	0.174797	0.112329	0.235616	2.09756	0.0909091	2.87402	0.211823	492					CTCF	0.0833333	0.74187	0.174797					CTCF	0.0833333	0.74187	0.174797					CTCF	0.112329	0.235616	2.09756					CTCF	0.112329	2.09756	2.09756					CTCF	0.0909091	2.87402
ZNF14	0.151163	0.674419	0.174419	0.224138	0.258621	1.15385	0.178082	2.07143	0.211268	172					ZNF14	0.151163	0.674419	0.174419					ZNF14	0.151163	0.674419	0.174419					ZNF14	0.224138	0.258621	1.15385					ZNF14	0.224138	1.15385	1.15385					ZNF14	0.178082	2.07143
FUBP1_ENST00000370768	0.134783	0.691304	0.173913	0.194969	0.251572	1.29032	0.155779	2.23944	0.210526	230					FUBP1_ENST00000370768	0.134783	0.691304	0.173913					FUBP1_ENST00000370768	0.134783	0.691304	0.173913					FUBP1_ENST00000370768	0.194969	0.251572	1.29032					FUBP1_ENST00000370768	0.194969	1.29032	1.29032					FUBP1_ENST00000370768	0.155779	2.23944
AGBL3	0.0944882	0.732283	0.173228	0.129032	0.236559	1.83333	0.104348	2.73529	0.209524	127					AGBL3	0.0944882	0.732283	0.173228					AGBL3	0.0944882	0.732283	0.173228					AGBL3	0.129032	0.236559	1.83333					AGBL3	0.129032	1.83333	1.83333					AGBL3	0.104348	2.73529
AGBL3_ENST00000458078	0.103448	0.724138	0.172414	0.142857	0.238095	1.66667	0.115385	2.625	0.208333	116					AGBL3_ENST00000458078	0.103448	0.724138	0.172414					AGBL3_ENST00000458078	0.103448	0.724138	0.172414					AGBL3_ENST00000458078	0.142857	0.238095	1.66667					AGBL3_ENST00000458078	0.142857	1.66667	1.66667					AGBL3_ENST00000458078	0.115385	2.625
CCDC41	0.147541	0.680328	0.172131	0.216867	0.253012	1.16667	0.173077	2.12821	0.207921	122					CCDC41	0.147541	0.680328	0.172131					CCDC41	0.147541	0.680328	0.172131					CCDC41	0.216867	0.253012	1.16667					CCDC41	0.216867	1.16667	1.16667					CCDC41	0.173077	2.12821
TP53_ENST00000269305	0.0106335	0.81805	0.171317	0.0129986	0.209421	16.1111	0.0107477	4.496	0.206734	11003					TP53_ENST00000269305	0.0106335	0.81805	0.171317					TP53_ENST00000269305	0.0106335	0.81805	0.171317					TP53_ENST00000269305	0.0129986	0.209421	16.1111					TP53_ENST00000269305	0.0129986	16.1111	16.1111					TP53_ENST00000269305	0.0107477	4.496
FBXW7_ENST00000281708	0.0311388	0.798043	0.170819	0.039019	0.214047	5.48571	0.0321396	3.95154	0.206009	1124					FBXW7_ENST00000281708	0.0311388	0.798043	0.170819					FBXW7_ENST00000281708	0.0311388	0.798043	0.170819					FBXW7_ENST00000281708	0.039019	0.214047	5.48571					FBXW7_ENST00000281708	0.039019	5.48571	5.48571					FBXW7_ENST00000281708	0.0321396	3.95154
TSC1	0.158	0.672	0.17	0.235119	0.252976	1.07595	0.187648	2.04878	0.204819	500					TSC1	0.158	0.672	0.17					TSC1	0.158	0.672	0.17					TSC1	0.235119	0.252976	1.07595					TSC1	0.235119	1.07595	1.07595					TSC1	0.187648	2.04878
TP53	0.0110118	0.820061	0.168928	0.013428	0.205994	15.3406	0.0111344	4.55743	0.203265	12532					TP53	0.0110118	0.820061	0.168928					TP53	0.0110118	0.820061	0.168928					TP53	0.013428	0.205994	15.3406					TP53	0.013428	15.3406	15.3406					TP53	0.0111344	4.55743
FBXW7	0.027027	0.804054	0.168919	0.0336134	0.210084	6.25	0.0277778	4.10345	0.203252	1332					FBXW7	0.027027	0.804054	0.168919					FBXW7	0.027027	0.804054	0.168919					FBXW7	0.0336134	0.210084	6.25					FBXW7	0.0336134	6.25	6.25					FBXW7	0.0277778	4.10345
LMAN1	0.178218	0.653465	0.168317	0.272727	0.257576	0.944444	0.216867	1.88571	0.202381	101					LMAN1	0.178218	0.653465	0.168317					LMAN1	0.178218	0.653465	0.168317					LMAN1	0.272727	0.257576	0.944444					LMAN1	0.272727	0.944444	0.944444					LMAN1	0.216867	1.88571
HLA-B	0.125654	0.706806	0.167539	0.177778	0.237037	1.33333	0.143713	2.41071	0.201258	191					HLA-B	0.125654	0.706806	0.167539					HLA-B	0.125654	0.706806	0.167539					HLA-B	0.177778	0.237037	1.33333					HLA-B	0.177778	1.33333	1.33333					HLA-B	0.143713	2.41071
PTCH1	0.16206	0.670854	0.167085	0.241573	0.249064	1.03101	0.193403	2.03817	0.200603	796					PTCH1	0.16206	0.670854	0.167085					PTCH1	0.16206	0.670854	0.167085					PTCH1	0.241573	0.249064	1.03101					PTCH1	0.241573	1.03101	1.03101					PTCH1	0.193403	2.03817
ING1	0.206349	0.626984	0.166667	0.329114	0.265823	0.807692	0.26	1.68085	0.2	126					ING1	0.206349	0.626984	0.166667					ING1	0.206349	0.626984	0.166667					ING1	0.329114	0.265823	0.807692					ING1	0.329114	0.807692	0.807692					ING1	0.26	1.68085
NCOR1_ENST00000395851	0.132051	0.701282	0.166667	0.1883	0.23766	1.26214	0.152142	2.34764	0.2	780					NCOR1_ENST00000395851	0.132051	0.701282	0.166667					NCOR1_ENST00000395851	0.132051	0.701282	0.166667					NCOR1_ENST00000395851	0.1883	0.23766	1.26214					NCOR1_ENST00000395851	0.1883	1.26214	1.26214					NCOR1_ENST00000395851	0.152142	2.34764
GIGYF2_ENST00000409451	0.159722	0.673611	0.166667	0.237113	0.247423	1.04348	0.190083	2.06383	0.2	288					GIGYF2_ENST00000409451	0.159722	0.673611	0.166667					GIGYF2_ENST00000409451	0.159722	0.673611	0.166667					GIGYF2_ENST00000409451	0.237113	0.247423	1.04348					GIGYF2_ENST00000409451	0.237113	1.04348	1.04348					GIGYF2_ENST00000409451	0.190083	2.06383
CCDC66_ENST00000436465	0.105263	0.72807	0.166667	0.144578	0.228916	1.58333	0.117647	2.67742	0.2	114					CCDC66_ENST00000436465	0.105263	0.72807	0.166667					CCDC66_ENST00000436465	0.105263	0.72807	0.166667					CCDC66_ENST00000436465	0.144578	0.228916	1.58333					CCDC66_ENST00000436465	0.144578	1.58333	1.58333					CCDC66_ENST00000436465	0.117647	2.67742
FBXW7_ENST00000296555	0.0304519	0.804519	0.165029	0.037851	0.205128	5.41935	0.0314083	4.11558	0.197647	1018					FBXW7_ENST00000296555	0.0304519	0.804519	0.165029					FBXW7_ENST00000296555	0.0304519	0.804519	0.165029					FBXW7_ENST00000296555	0.037851	0.205128	5.41935					FBXW7_ENST00000296555	0.037851	5.41935	5.41935					FBXW7_ENST00000296555	0.0314083	4.11558
ZRSR2	0.107595	0.727848	0.164557	0.147826	0.226087	1.52941	0.120567	2.67442	0.19697	158					ZRSR2	0.107595	0.727848	0.164557					ZRSR2	0.107595	0.727848	0.164557					ZRSR2	0.147826	0.226087	1.52941					ZRSR2	0.147826	1.52941	1.52941					ZRSR2	0.120567	2.67442
ATM_ENST00000278616	0.0661818	0.769455	0.164364	0.0860113	0.213611	2.48352	0.0708723	3.33754	0.196693	1375					ATM_ENST00000278616	0.0661818	0.769455	0.164364					ATM_ENST00000278616	0.0661818	0.769455	0.164364					ATM_ENST00000278616	0.0860113	0.213611	2.48352					ATM_ENST00000278616	0.0860113	2.48352	2.48352					ATM_ENST00000278616	0.0708723	3.33754
NSUN6	0.154545	0.681818	0.163636	0.226667	0.24	1.05882	0.182796	2.14286	0.195652	110					NSUN6	0.154545	0.681818	0.163636					NSUN6	0.154545	0.681818	0.163636					NSUN6	0.226667	0.24	1.05882					NSUN6	0.226667	1.05882	1.05882					NSUN6	0.182796	2.14286
IFT57	0.192308	0.644231	0.163462	0.298507	0.253731	0.85	0.238095	1.81081	0.195402	104					IFT57	0.192308	0.644231	0.163462					IFT57	0.192308	0.644231	0.163462					IFT57	0.298507	0.253731	0.85					IFT57	0.298507	0.85	0.85					IFT57	0.238095	1.81081
RNF6	0.161074	0.677852	0.161074	0.237624	0.237624	1	0.192	2.10417	0.192	149					RNF6	0.161074	0.677852	0.161074					RNF6	0.161074	0.677852	0.161074					RNF6	0.237624	0.237624	1					RNF6	0.237624	1	1					RNF6	0.192	2.10417
FBXW7_NM_018315_2	0.0370028	0.802035	0.160962	0.0461361	0.200692	4.35	0.0384246	4.0514	0.191841	1081					FBXW7_NM_018315_2	0.0370028	0.802035	0.160962					FBXW7_NM_018315_2	0.0370028	0.802035	0.160962					FBXW7_NM_018315_2	0.0461361	0.200692	4.35					FBXW7_NM_018315_2	0.0461361	4.35	4.35					FBXW7_NM_018315_2	0.0384246	4.0514
LATS1_ENST00000392273	0.0881226	0.750958	0.16092	0.117347	0.214286	1.82609	0.0966387	3.01538	0.191781	261					LATS1_ENST00000392273	0.0881226	0.750958	0.16092					LATS1_ENST00000392273	0.0881226	0.750958	0.16092					LATS1_ENST00000392273	0.117347	0.214286	1.82609					LATS1_ENST00000392273	0.117347	1.82609	1.82609					LATS1_ENST00000392273	0.0966387	3.01538
FAT1	0.149165	0.690361	0.160474	0.216069	0.232449	1.07581	0.175316	2.22957	0.191148	1857					FAT1	0.149165	0.690361	0.160474					FAT1	0.149165	0.690361	0.160474					FAT1	0.216069	0.232449	1.07581					FAT1	0.216069	1.07581	1.07581					FAT1	0.175316	2.22957
ATM	0.0673317	0.772444	0.160224	0.0871671	0.207425	2.37963	0.0721925	3.39452	0.190794	1604					ATM	0.0673317	0.772444	0.160224					ATM	0.0673317	0.772444	0.160224					ATM	0.0871671	0.207425	2.37963					ATM	0.0871671	2.37963	2.37963					ATM	0.0721925	3.39452
EIF2AK1_ENST00000536084	0.224	0.616	0.16	0.363636	0.25974	0.714286	0.28866	1.60417	0.190476	125					EIF2AK1_ENST00000536084	0.224	0.616	0.16					EIF2AK1_ENST00000536084	0.224	0.616	0.16					EIF2AK1_ENST00000536084	0.363636	0.25974	0.714286					EIF2AK1_ENST00000536084	0.363636	0.714286	0.714286					EIF2AK1_ENST00000536084	0.28866	1.60417
CDC73	0.064	0.776	0.16	0.0824742	0.206186	2.5	0.0683761	3.46429	0.190476	250					CDC73	0.064	0.776	0.16					CDC73	0.064	0.776	0.16					CDC73	0.0824742	0.206186	2.5					CDC73	0.0824742	2.5	2.5					CDC73	0.0683761	3.46429
MTMR2_ENST00000346299	0.238938	0.60177	0.159292	0.397059	0.264706	0.666667	0.313953	1.51111	0.189474	113					MTMR2_ENST00000346299	0.238938	0.60177	0.159292					MTMR2_ENST00000346299	0.238938	0.60177	0.159292					MTMR2_ENST00000346299	0.397059	0.264706	0.666667					MTMR2_ENST00000346299	0.397059	0.666667	0.666667					MTMR2_ENST00000346299	0.313953	1.51111
NCOR1	0.1323	0.709178	0.158522	0.186555	0.223529	1.1982	0.152473	2.43852	0.188385	839					NCOR1	0.1323	0.709178	0.158522					NCOR1	0.1323	0.709178	0.158522					NCOR1	0.186555	0.223529	1.1982					NCOR1	0.186555	1.1982	1.1982					NCOR1	0.152473	2.43852
LUC7L2_ENST00000541170	0.108911	0.732673	0.158416	0.148649	0.216216	1.45455	0.122222	2.74074	0.188235	101					LUC7L2_ENST00000541170	0.108911	0.732673	0.158416					LUC7L2_ENST00000541170	0.108911	0.732673	0.158416					LUC7L2_ENST00000541170	0.148649	0.216216	1.45455					LUC7L2_ENST00000541170	0.148649	1.45455	1.45455					LUC7L2_ENST00000541170	0.122222	2.74074
CCDC66_ENST00000394672	0.107438	0.735537	0.157025	0.146067	0.213483	1.46154	0.12037	2.78125	0.186275	121					CCDC66_ENST00000394672	0.107438	0.735537	0.157025					CCDC66_ENST00000394672	0.107438	0.735537	0.157025					CCDC66_ENST00000394672	0.146067	0.213483	1.46154					CCDC66_ENST00000394672	0.146067	1.46154	1.46154					CCDC66_ENST00000394672	0.12037	2.78125
LUC7L2_ENST00000263545	0.0980392	0.745098	0.156863	0.131579	0.210526	1.6	0.108696	2.92308	0.186047	102					LUC7L2_ENST00000263545	0.0980392	0.745098	0.156863					LUC7L2_ENST00000263545	0.0980392	0.745098	0.156863					LUC7L2_ENST00000263545	0.131579	0.210526	1.6					LUC7L2_ENST00000263545	0.131579	1.6	1.6					LUC7L2_ENST00000263545	0.108696	2.92308
NAA15	0.115646	0.727891	0.156463	0.158879	0.214953	1.35294	0.130769	2.675	0.185484	147					NAA15	0.115646	0.727891	0.156463					NAA15	0.115646	0.727891	0.156463					NAA15	0.158879	0.214953	1.35294					NAA15	0.158879	1.35294	1.35294					NAA15	0.130769	2.675
FAT	0.149777	0.693764	0.156459	0.215891	0.225522	1.04461	0.176162	2.26545	0.185479	1796					FAT	0.149777	0.693764	0.156459					FAT	0.149777	0.693764	0.156459					FAT	0.215891	0.225522	1.04461					FAT	0.215891	1.04461	1.04461					FAT	0.176162	2.26545
MTMR2	0.23301	0.61165	0.15534	0.380952	0.253968	0.666667	0.303797	1.575	0.183908	103					MTMR2	0.23301	0.61165	0.15534					MTMR2	0.23301	0.61165	0.15534					MTMR2	0.380952	0.253968	0.666667					MTMR2	0.380952	0.666667	0.666667					MTMR2	0.303797	1.575
TP53_ENST00000413465	0.0108537	0.83415	0.154997	0.0130117	0.185814	14.2805	0.0109728	5.02953	0.183427	7555					TP53_ENST00000413465	0.0108537	0.83415	0.154997					TP53_ENST00000413465	0.0108537	0.83415	0.154997					TP53_ENST00000413465	0.0130117	0.185814	14.2805					TP53_ENST00000413465	0.0130117	14.2805	14.2805					TP53_ENST00000413465	0.0109728	5.02953
FBXW7_ENST00000534231	0.0278884	0.817729	0.154382	0.0341048	0.188794	5.53571	0.0286885	4.48634	0.182568	1004					FBXW7_ENST00000534231	0.0278884	0.817729	0.154382					FBXW7_ENST00000534231	0.0278884	0.817729	0.154382					FBXW7_ENST00000534231	0.0341048	0.188794	5.53571					FBXW7_ENST00000534231	0.0341048	5.53571	5.53571					FBXW7_ENST00000534231	0.0286885	4.48634
BMPR2	0.170833	0.675	0.154167	0.253086	0.228395	0.902439	0.20603	2.07692	0.182266	240					BMPR2	0.170833	0.675	0.154167					BMPR2	0.170833	0.675	0.154167					BMPR2	0.253086	0.228395	0.902439					BMPR2	0.253086	0.902439	0.902439					BMPR2	0.20603	2.07692
MAN1A2	0.207692	0.638462	0.153846	0.325301	0.240964	0.740741	0.262136	1.76596	0.181818	130					MAN1A2	0.207692	0.638462	0.153846					MAN1A2	0.207692	0.638462	0.153846					MAN1A2	0.325301	0.240964	0.740741					MAN1A2	0.325301	0.740741	0.740741					MAN1A2	0.262136	1.76596
ASXL2	0.135977	0.711048	0.152975	0.191235	0.215139	1.125	0.157377	2.46078	0.180602	353					ASXL2	0.135977	0.711048	0.152975					ASXL2	0.135977	0.711048	0.152975					ASXL2	0.191235	0.215139	1.125					ASXL2	0.191235	1.125	1.125					ASXL2	0.157377	2.46078
ACVR1B_ENST00000541224	0.104803	0.742358	0.152838	0.141176	0.205882	1.45833	0.117073	2.88136	0.180412	229					ACVR1B_ENST00000541224	0.104803	0.742358	0.152838					ACVR1B_ENST00000541224	0.104803	0.742358	0.152838					ACVR1B_ENST00000541224	0.141176	0.205882	1.45833					ACVR1B_ENST00000541224	0.141176	1.45833	1.45833					ACVR1B_ENST00000541224	0.117073	2.88136
RBBP5	0.193277	0.655462	0.151261	0.294872	0.230769	0.782609	0.239583	1.90244	0.178218	119					RBBP5	0.193277	0.655462	0.151261					RBBP5	0.193277	0.655462	0.151261					RBBP5	0.294872	0.230769	0.782609					RBBP5	0.294872	0.782609	0.782609					RBBP5	0.239583	1.90244
TP53_ENST00000420246	0.0126841	0.837152	0.150164	0.0151515	0.179374	11.8387	0.0128471	5.1407	0.176697	9776					TP53_ENST00000420246	0.0126841	0.837152	0.150164					TP53_ENST00000420246	0.0126841	0.837152	0.150164					TP53_ENST00000420246	0.0151515	0.179374	11.8387					TP53_ENST00000420246	0.0151515	11.8387	11.8387					TP53_ENST00000420246	0.0128471	5.1407
LATS1_ENST00000543571	0.0803571	0.770089	0.149554	0.104348	0.194203	1.86111	0.0873786	3.34951	0.175853	448					LATS1_ENST00000543571	0.0803571	0.770089	0.149554					LATS1_ENST00000543571	0.0803571	0.770089	0.149554					LATS1_ENST00000543571	0.104348	0.194203	1.86111					LATS1_ENST00000543571	0.104348	1.86111	1.86111					LATS1_ENST00000543571	0.0873786	3.34951
CTNND1	0.140271	0.710407	0.149321	0.197452	0.210191	1.06452	0.163158	2.45312	0.175532	221					CTNND1	0.140271	0.710407	0.149321					CTNND1	0.140271	0.710407	0.149321					CTNND1	0.197452	0.210191	1.06452					CTNND1	0.197452	1.06452	1.06452					CTNND1	0.163158	2.45312
TP53_ENST00000455263	0.011532	0.839547	0.148921	0.0137359	0.177383	12.9138	0.0116665	5.23234	0.17498	10059					TP53_ENST00000455263	0.011532	0.839547	0.148921					TP53_ENST00000455263	0.011532	0.839547	0.148921					TP53_ENST00000455263	0.0137359	0.177383	12.9138					TP53_ENST00000455263	0.0137359	12.9138	12.9138					TP53_ENST00000455263	0.0116665	5.23234
COLQ_ENST00000435459	0.207921	0.643564	0.148515	0.323077	0.230769	0.714286	0.2625	1.80556	0.174419	101					COLQ_ENST00000435459	0.207921	0.643564	0.148515					COLQ_ENST00000435459	0.207921	0.643564	0.148515					COLQ_ENST00000435459	0.323077	0.230769	0.714286					COLQ_ENST00000435459	0.323077	0.714286	0.714286					COLQ_ENST00000435459	0.2625	1.80556
PTPN2	0.148515	0.70297	0.148515	0.211268	0.211268	1	0.174419	2.36667	0.174419	101					PTPN2	0.148515	0.70297	0.148515					PTPN2	0.148515	0.70297	0.148515					PTPN2	0.211268	0.211268	1					PTPN2	0.211268	1	1					PTPN2	0.174419	2.36667
MSH6	0.107527	0.744086	0.148387	0.144509	0.199422	1.38	0.120482	2.90756	0.174242	465					MSH6	0.107527	0.744086	0.148387					MSH6	0.107527	0.744086	0.148387					MSH6	0.144509	0.199422	1.38					MSH6	0.144509	1.38	1.38					MSH6	0.120482	2.90756
TCF7L2	0.15727	0.694362	0.148368	0.226496	0.213675	0.943396	0.18662	2.27184	0.174216	337					TCF7L2	0.15727	0.694362	0.148368					TCF7L2	0.15727	0.694362	0.148368					TCF7L2	0.226496	0.213675	0.943396					TCF7L2	0.226496	0.943396	0.943396					TCF7L2	0.18662	2.27184
TCF7L2_ENST00000543371	0.137363	0.714286	0.148352	0.192308	0.207692	1.08	0.159236	2.5	0.174194	364					TCF7L2_ENST00000543371	0.137363	0.714286	0.148352					TCF7L2_ENST00000543371	0.137363	0.714286	0.148352					TCF7L2_ENST00000543371	0.192308	0.207692	1.08					TCF7L2_ENST00000543371	0.192308	1.08	1.08					TCF7L2_ENST00000543371	0.159236	2.5
USP43	0.185185	0.666667	0.148148	0.277778	0.222222	0.8	0.227273	2	0.173913	270					USP43	0.185185	0.666667	0.148148					USP43	0.185185	0.666667	0.148148					USP43	0.277778	0.222222	0.8					USP43	0.277778	0.8	0.8					USP43	0.227273	2
RBM46	0.193878	0.658163	0.147959	0.294574	0.224806	0.763158	0.240506	1.92537	0.173653	196					RBM46	0.193878	0.658163	0.147959					RBM46	0.193878	0.658163	0.147959					RBM46	0.294574	0.224806	0.763158					RBM46	0.294574	0.763158	0.763158					RBM46	0.240506	1.92537
GRLF1_ENST00000317082	0.17602	0.67602	0.147959	0.260377	0.218868	0.84058	0.213622	2.08661	0.173653	392					GRLF1_ENST00000317082	0.17602	0.67602	0.147959					GRLF1_ENST00000317082	0.17602	0.67602	0.147959					GRLF1_ENST00000317082	0.260377	0.218868	0.84058					GRLF1_ENST00000317082	0.260377	0.84058	0.84058					GRLF1_ENST00000317082	0.213622	2.08661
YLPM1	0.188095	0.664286	0.147619	0.283154	0.222222	0.78481	0.231672	1.97872	0.173184	420					YLPM1	0.188095	0.664286	0.147619					YLPM1	0.188095	0.664286	0.147619					YLPM1	0.283154	0.222222	0.78481					YLPM1	0.283154	0.78481	0.78481					YLPM1	0.231672	1.97872
ASXL2_ENST00000435504	0.123134	0.729478	0.147388	0.168798	0.202046	1.19697	0.140426	2.69655	0.172867	536					ASXL2_ENST00000435504	0.123134	0.729478	0.147388					ASXL2_ENST00000435504	0.123134	0.729478	0.147388					ASXL2_ENST00000435504	0.168798	0.202046	1.19697					ASXL2_ENST00000435504	0.168798	1.19697	1.19697					ASXL2_ENST00000435504	0.140426	2.69655
PIK3R3_ENST00000540385	0.0775862	0.775862	0.146552	0.1	0.188889	1.88889	0.0841121	3.46154	0.171717	116					PIK3R3_ENST00000540385	0.0775862	0.775862	0.146552					PIK3R3_ENST00000540385	0.0775862	0.775862	0.146552					PIK3R3_ENST00000540385	0.1	0.188889	1.88889					PIK3R3_ENST00000540385	0.1	1.88889	1.88889					PIK3R3_ENST00000540385	0.0841121	3.46154
BCOR	0.162162	0.691323	0.146515	0.234568	0.211934	0.903509	0.193548	2.23963	0.171667	703					BCOR	0.162162	0.691323	0.146515					BCOR	0.162162	0.691323	0.146515					BCOR	0.234568	0.211934	0.903509					BCOR	0.234568	0.903509	0.903509					BCOR	0.193548	2.23963
LATS1_ENST00000253339	0.0784314	0.775599	0.145969	0.101124	0.188202	1.86111	0.0851064	3.45631	0.170918	459					LATS1_ENST00000253339	0.0784314	0.775599	0.145969					LATS1_ENST00000253339	0.0784314	0.775599	0.145969					LATS1_ENST00000253339	0.101124	0.188202	1.86111					LATS1_ENST00000253339	0.101124	1.86111	1.86111					LATS1_ENST00000253339	0.0851064	3.45631
GRLF1	0.175202	0.679245	0.145553	0.257937	0.214286	0.830769	0.212418	2.11765	0.170347	371					GRLF1	0.175202	0.679245	0.145553					GRLF1	0.175202	0.679245	0.145553					GRLF1	0.257937	0.214286	0.830769					GRLF1	0.257937	0.830769	0.830769					GRLF1	0.212418	2.11765
CTNND1_ENST00000399050	0.131818	0.722727	0.145455	0.18239	0.201258	1.10345	0.151832	2.60656	0.170213	220					CTNND1_ENST00000399050	0.131818	0.722727	0.145455					CTNND1_ENST00000399050	0.131818	0.722727	0.145455					CTNND1_ENST00000399050	0.18239	0.201258	1.10345					CTNND1_ENST00000399050	0.18239	1.10345	1.10345					CTNND1_ENST00000399050	0.151832	2.60656
TRIM22	0.230769	0.623932	0.145299	0.369863	0.232877	0.62963	0.3	1.65909	0.17	117					TRIM22	0.230769	0.623932	0.145299					TRIM22	0.230769	0.623932	0.145299					TRIM22	0.369863	0.232877	0.62963					TRIM22	0.369863	0.62963	0.62963					TRIM22	0.3	1.65909
SPATA17	0.224638	0.630435	0.144928	0.356322	0.229885	0.645161	0.28972	1.70588	0.169492	138					SPATA17	0.224638	0.630435	0.144928					SPATA17	0.224638	0.630435	0.144928					SPATA17	0.356322	0.229885	0.645161					SPATA17	0.356322	0.645161	0.645161					SPATA17	0.28972	1.70588
CPA6_ENST00000518549	0.201923	0.653846	0.144231	0.308824	0.220588	0.714286	0.253012	1.88889	0.168539	104					CPA6_ENST00000518549	0.201923	0.653846	0.144231					CPA6_ENST00000518549	0.201923	0.653846	0.144231					CPA6_ENST00000518549	0.308824	0.220588	0.714286					CPA6_ENST00000518549	0.308824	0.714286	0.714286					CPA6_ENST00000518549	0.253012	1.88889
CCDC82	0.171171	0.684685	0.144144	0.25	0.210526	0.842105	0.206522	2.17143	0.168421	111					CCDC82	0.171171	0.684685	0.144144					CCDC82	0.171171	0.684685	0.144144					CCDC82	0.25	0.210526	0.842105					CCDC82	0.25	0.842105	0.842105					CCDC82	0.206522	2.17143
USP28	0.143836	0.712329	0.143836	0.201923	0.201923	1	0.168	2.47619	0.168	292					USP28	0.143836	0.712329	0.143836					USP28	0.143836	0.712329	0.143836					USP28	0.201923	0.201923	1					USP28	0.201923	1	1					USP28	0.168	2.47619
CDK8	0.0891089	0.767327	0.143564	0.116129	0.187097	1.61111	0.0978261	3.29787	0.16763	202					CDK8	0.0891089	0.767327	0.143564					CDK8	0.0891089	0.767327	0.143564					CDK8	0.116129	0.187097	1.61111					CDK8	0.116129	1.61111	1.61111					CDK8	0.0978261	3.29787
PNISR	0.118012	0.73913	0.142857	0.159664	0.193277	1.21053	0.133803	2.83333	0.166667	161					PNISR	0.118012	0.73913	0.142857					PNISR	0.118012	0.73913	0.142857					PNISR	0.159664	0.193277	1.21053					PNISR	0.159664	1.21053	1.21053					PNISR	0.133803	2.83333
RBPJ_ENST00000348160	0.260504	0.596639	0.142857	0.43662	0.239437	0.548387	0.352273	1.47917	0.166667	119					RBPJ_ENST00000348160	0.260504	0.596639	0.142857					RBPJ_ENST00000348160	0.260504	0.596639	0.142857					RBPJ_ENST00000348160	0.43662	0.239437	0.548387					RBPJ_ENST00000348160	0.43662	0.548387	0.548387					RBPJ_ENST00000348160	0.352273	1.47917
YLPM1_ENST00000325680	0.192149	0.665289	0.142562	0.28882	0.214286	0.741935	0.237852	1.98765	0.166265	484					YLPM1_ENST00000325680	0.192149	0.665289	0.142562					YLPM1_ENST00000325680	0.192149	0.665289	0.142562					YLPM1_ENST00000325680	0.28882	0.214286	0.741935					YLPM1_ENST00000325680	0.28882	0.741935	0.741935					YLPM1_ENST00000325680	0.237852	1.98765
CREBBP	0.118508	0.739576	0.141917	0.160237	0.191889	1.19753	0.13444	2.83989	0.165388	1367					CREBBP	0.118508	0.739576	0.141917					CREBBP	0.118508	0.739576	0.141917					CREBBP	0.160237	0.191889	1.19753					CREBBP	0.160237	1.19753	1.19753					CREBBP	0.13444	2.83989
RTKN2_ENST00000395265	0.233333	0.625	0.141667	0.373333	0.226667	0.607143	0.304348	1.66667	0.165049	120					RTKN2_ENST00000395265	0.233333	0.625	0.141667					RTKN2_ENST00000395265	0.233333	0.625	0.141667					RTKN2_ENST00000395265	0.373333	0.226667	0.607143					RTKN2_ENST00000395265	0.373333	0.607143	0.607143					RTKN2_ENST00000395265	0.304348	1.66667
UPF3B	0.0916667	0.766667	0.141667	0.119565	0.184783	1.54545	0.100917	3.28571	0.165049	120					UPF3B	0.0916667	0.766667	0.141667					UPF3B	0.0916667	0.766667	0.141667					UPF3B	0.119565	0.184783	1.54545					UPF3B	0.119565	1.54545	1.54545					UPF3B	0.100917	3.28571
CYLD_ENST00000427738	0.179245	0.679245	0.141509	0.263889	0.208333	0.789474	0.218391	2.11765	0.164835	106					CYLD_ENST00000427738	0.179245	0.679245	0.141509					CYLD_ENST00000427738	0.179245	0.679245	0.141509					CYLD_ENST00000427738	0.263889	0.208333	0.789474					CYLD_ENST00000427738	0.263889	0.789474	0.789474					CYLD_ENST00000427738	0.218391	2.11765
TGFBR1	0.062069	0.796552	0.141379	0.0779221	0.177489	2.27778	0.0661765	3.91525	0.164659	290					TGFBR1	0.062069	0.796552	0.141379					TGFBR1	0.062069	0.796552	0.141379					TGFBR1	0.0779221	0.177489	2.27778					TGFBR1	0.0779221	2.27778	2.27778					TGFBR1	0.0661765	3.91525
TNRC6B_ENST00000454349	0.280591	0.578059	0.14135	0.485401	0.244526	0.503759	0.390029	1.37	0.164619	474					TNRC6B_ENST00000454349	0.280591	0.578059	0.14135					TNRC6B_ENST00000454349	0.280591	0.578059	0.14135					TNRC6B_ENST00000454349	0.485401	0.244526	0.503759					TNRC6B_ENST00000454349	0.485401	0.503759	0.503759					TNRC6B_ENST00000454349	0.390029	1.37
CEP95_ENST00000556440	0.147651	0.711409	0.14094	0.207547	0.198113	0.954545	0.173228	2.46512	0.164062	149					CEP95_ENST00000556440	0.147651	0.711409	0.14094					CEP95_ENST00000556440	0.147651	0.711409	0.14094					CEP95_ENST00000556440	0.207547	0.198113	0.954545					CEP95_ENST00000556440	0.207547	0.954545	0.954545					CEP95_ENST00000556440	0.173228	2.46512
CEP135	0.106796	0.752427	0.140777	0.141935	0.187097	1.31818	0.119565	3.03922	0.163842	206					CEP135	0.106796	0.752427	0.140777					CEP135	0.106796	0.752427	0.140777					CEP135	0.141935	0.187097	1.31818					CEP135	0.141935	1.31818	1.31818					CEP135	0.119565	3.03922
CCND3	0.157025	0.702479	0.140496	0.223529	0.2	0.894737	0.186275	2.36111	0.163462	121					CCND3	0.157025	0.702479	0.140496					CCND3	0.157025	0.702479	0.140496					CCND3	0.223529	0.2	0.894737					CCND3	0.223529	0.894737	0.894737					CCND3	0.186275	2.36111
AHCTF1_ENST00000326225	0.174825	0.685315	0.13986	0.255102	0.204082	0.8	0.211864	2.17778	0.162602	143					AHCTF1_ENST00000326225	0.174825	0.685315	0.13986					AHCTF1_ENST00000326225	0.174825	0.685315	0.13986					AHCTF1_ENST00000326225	0.255102	0.204082	0.8					AHCTF1_ENST00000326225	0.255102	0.8	0.8					AHCTF1_ENST00000326225	0.211864	2.17778
SMC5	0.111628	0.748837	0.139535	0.149068	0.186335	1.25	0.125654	2.98148	0.162162	215					SMC5	0.111628	0.748837	0.139535					SMC5	0.111628	0.748837	0.139535					SMC5	0.149068	0.186335	1.25					SMC5	0.149068	1.25	1.25					SMC5	0.125654	2.98148
ZC3H13_ENST00000242848	0.141844	0.718676	0.13948	0.197368	0.194079	0.983333	0.165289	2.55462	0.162088	423					ZC3H13_ENST00000242848	0.141844	0.718676	0.13948					ZC3H13_ENST00000242848	0.141844	0.718676	0.13948					ZC3H13_ENST00000242848	0.197368	0.194079	0.983333					ZC3H13_ENST00000242848	0.197368	0.983333	0.983333					ZC3H13_ENST00000242848	0.165289	2.55462
BCOR_ENST00000378444	0.160584	0.70073	0.138686	0.229167	0.197917	0.863636	0.191304	2.34146	0.161017	685					BCOR_ENST00000378444	0.160584	0.70073	0.138686					BCOR_ENST00000378444	0.160584	0.70073	0.138686					BCOR_ENST00000378444	0.229167	0.197917	0.863636					BCOR_ENST00000378444	0.229167	0.863636	0.863636					BCOR_ENST00000378444	0.191304	2.34146
RAD21	0.105839	0.755474	0.138686	0.140097	0.183575	1.31034	0.118367	3.08955	0.161017	274					RAD21	0.105839	0.755474	0.138686					RAD21	0.105839	0.755474	0.138686					RAD21	0.140097	0.183575	1.31034					RAD21	0.140097	1.31034	1.31034					RAD21	0.118367	3.08955
ZNF292_ENST00000369577	0.163223	0.698347	0.13843	0.233728	0.198225	0.848101	0.195062	2.31507	0.160671	484					ZNF292_ENST00000369577	0.163223	0.698347	0.13843					ZNF292_ENST00000369577	0.163223	0.698347	0.13843					ZNF292_ENST00000369577	0.233728	0.198225	0.848101					ZNF292_ENST00000369577	0.233728	0.848101	0.848101					ZNF292_ENST00000369577	0.195062	2.31507
SAMSN1_ENST00000285670	0.188679	0.672956	0.138365	0.280374	0.205607	0.733333	0.232558	2.05769	0.160584	159					SAMSN1_ENST00000285670	0.188679	0.672956	0.138365					SAMSN1_ENST00000285670	0.188679	0.672956	0.138365					SAMSN1_ENST00000285670	0.280374	0.205607	0.733333					SAMSN1_ENST00000285670	0.280374	0.733333	0.733333					SAMSN1_ENST00000285670	0.232558	2.05769
CHUK	0.118421	0.743421	0.138158	0.159292	0.185841	1.16667	0.134328	2.89744	0.160305	152					CHUK	0.118421	0.743421	0.138158					CHUK	0.118421	0.743421	0.138158					CHUK	0.159292	0.185841	1.16667					CHUK	0.159292	1.16667	1.16667					CHUK	0.134328	2.89744
NOTCH1	0.111111	0.750765	0.138124	0.147997	0.183978	1.24312	0.125	3.01227	0.16026	1962					NOTCH1	0.111111	0.750765	0.138124					NOTCH1	0.111111	0.750765	0.138124					NOTCH1	0.147997	0.183978	1.24312					NOTCH1	0.147997	1.24312	1.24312					NOTCH1	0.125	3.01227
TNRC6B_ENST00000301923	0.262931	0.599138	0.137931	0.438849	0.230216	0.52459	0.356725	1.49462	0.16	232					TNRC6B_ENST00000301923	0.262931	0.599138	0.137931					TNRC6B_ENST00000301923	0.262931	0.599138	0.137931					TNRC6B_ENST00000301923	0.438849	0.230216	0.52459					TNRC6B_ENST00000301923	0.438849	0.52459	0.52459					TNRC6B_ENST00000301923	0.356725	1.49462
TP53_ENST00000545858	0.00472633	0.857448	0.137826	0.00551209	0.16074	29.1613	0.00474877	6.01497	0.159859	6559					TP53_ENST00000545858	0.00472633	0.857448	0.137826					TP53_ENST00000545858	0.00472633	0.857448	0.137826					TP53_ENST00000545858	0.00551209	0.16074	29.1613					TP53_ENST00000545858	0.00551209	29.1613	29.1613					TP53_ENST00000545858	0.00474877	6.01497
SIN3A	0.188623	0.673653	0.137725	0.28	0.204444	0.730159	0.232472	2.06422	0.159722	334					SIN3A	0.188623	0.673653	0.137725					SIN3A	0.188623	0.673653	0.137725					SIN3A	0.28	0.204444	0.730159					SIN3A	0.28	0.730159	0.730159					SIN3A	0.232472	2.06422
IWS1	0.167665	0.694611	0.137725	0.241379	0.198276	0.821429	0.201439	2.27451	0.159722	167					IWS1	0.167665	0.694611	0.137725					IWS1	0.167665	0.694611	0.137725					IWS1	0.241379	0.198276	0.821429					IWS1	0.241379	0.821429	0.821429					IWS1	0.201439	2.27451
CDC7	0.156863	0.705882	0.137255	0.222222	0.194444	0.875	0.186047	2.4	0.159091	102					CDC7	0.156863	0.705882	0.137255					CDC7	0.156863	0.705882	0.137255					CDC7	0.222222	0.194444	0.875					CDC7	0.222222	0.875	0.875					CDC7	0.186047	2.4
FAS	0.190909	0.672727	0.136364	0.283784	0.202703	0.714286	0.235955	2.05556	0.157895	110					FAS	0.190909	0.672727	0.136364					FAS	0.190909	0.672727	0.136364					FAS	0.283784	0.202703	0.714286					FAS	0.283784	0.714286	0.714286					FAS	0.235955	2.05556
CEP95	0.155844	0.707792	0.136364	0.220183	0.192661	0.875	0.184615	2.42222	0.157895	154					CEP95	0.155844	0.707792	0.136364					CEP95	0.155844	0.707792	0.136364					CEP95	0.220183	0.192661	0.875					CEP95	0.220183	0.875	0.875					CEP95	0.184615	2.42222
COLQ_ENST00000383781	0.194175	0.669903	0.135922	0.289855	0.202899	0.7	0.240964	2.02941	0.157303	103					COLQ_ENST00000383781	0.194175	0.669903	0.135922					COLQ_ENST00000383781	0.194175	0.669903	0.135922					COLQ_ENST00000383781	0.289855	0.202899	0.7					COLQ_ENST00000383781	0.289855	0.7	0.7					COLQ_ENST00000383781	0.240964	2.02941
ZNF323	0.184466	0.679612	0.135922	0.271429	0.2	0.736842	0.22619	2.12121	0.157303	103					ZNF323	0.184466	0.679612	0.135922					ZNF323	0.184466	0.679612	0.135922					ZNF323	0.271429	0.2	0.736842					ZNF323	0.271429	0.736842	0.736842					ZNF323	0.22619	2.12121
NOTCH1_ENST00000277541	0.115364	0.748787	0.135849	0.154068	0.181425	1.17757	0.130408	2.98069	0.157205	1855					NOTCH1_ENST00000277541	0.115364	0.748787	0.135849					NOTCH1_ENST00000277541	0.115364	0.748787	0.135849					NOTCH1_ENST00000277541	0.154068	0.181425	1.17757					NOTCH1_ENST00000277541	0.154068	1.17757	1.17757					NOTCH1_ENST00000277541	0.130408	2.98069
RAD54B	0.180645	0.683871	0.135484	0.264151	0.198113	0.75	0.220472	2.16327	0.156716	155					RAD54B	0.180645	0.683871	0.135484					RAD54B	0.180645	0.683871	0.135484					RAD54B	0.264151	0.198113	0.75					RAD54B	0.264151	0.75	0.75					RAD54B	0.220472	2.16327
ARID1B	0.152828	0.712395	0.134777	0.214527	0.189189	0.88189	0.180398	2.47699	0.155772	831					ARID1B	0.152828	0.712395	0.134777					ARID1B	0.152828	0.712395	0.134777					ARID1B	0.214527	0.189189	0.88189					ARID1B	0.214527	0.88189	0.88189					ARID1B	0.180398	2.47699
ATG14	0.153846	0.711538	0.134615	0.216216	0.189189	0.875	0.181818	2.46667	0.155556	104					ATG14	0.153846	0.711538	0.134615					ATG14	0.153846	0.711538	0.134615					ATG14	0.216216	0.189189	0.875					ATG14	0.216216	0.875	0.875					ATG14	0.181818	2.46667
CDCA7L	0.133929	0.732143	0.133929	0.182927	0.182927	1	0.154639	2.73333	0.154639	112					CDCA7L	0.133929	0.732143	0.133929					CDCA7L	0.133929	0.732143	0.133929					CDCA7L	0.182927	0.182927	1					CDCA7L	0.182927	1	1					CDCA7L	0.154639	2.73333
BCOR_ENST00000378463	0.133574	0.732852	0.133574	0.182266	0.182266	1	0.154167	2.74324	0.154167	277					BCOR_ENST00000378463	0.133574	0.732852	0.133574					BCOR_ENST00000378463	0.133574	0.732852	0.133574					BCOR_ENST00000378463	0.182266	0.182266	1					BCOR_ENST00000378463	0.182266	1	1					BCOR_ENST00000378463	0.154167	2.74324
KLRAQ1	0.233333	0.633333	0.133333	0.368421	0.210526	0.571429	0.304348	1.72727	0.153846	150					KLRAQ1	0.233333	0.633333	0.133333					KLRAQ1	0.233333	0.633333	0.133333					KLRAQ1	0.368421	0.210526	0.571429					KLRAQ1	0.368421	0.571429	0.571429					KLRAQ1	0.304348	1.72727
ZNF292	0.15914	0.707527	0.133333	0.224924	0.18845	0.837838	0.189258	2.41912	0.153846	465					ZNF292	0.15914	0.707527	0.133333					ZNF292	0.15914	0.707527	0.133333					ZNF292	0.224924	0.18845	0.837838					ZNF292	0.224924	0.837838	0.837838					ZNF292	0.189258	2.41912
ARHGAP35	0.192308	0.674556	0.133136	0.285088	0.197368	0.692308	0.238095	2.07273	0.153584	338					ARHGAP35	0.192308	0.674556	0.133136					ARHGAP35	0.192308	0.674556	0.133136					ARHGAP35	0.285088	0.197368	0.692308					ARHGAP35	0.285088	0.692308	0.692308					ARHGAP35	0.238095	2.07273
SENP6	0.207447	0.659574	0.132979	0.314516	0.201613	0.641026	0.261745	1.9375	0.153374	188					SENP6	0.207447	0.659574	0.132979					SENP6	0.207447	0.659574	0.132979					SENP6	0.314516	0.201613	0.641026					SENP6	0.314516	0.641026	0.641026					SENP6	0.261745	1.9375
EIF2AK1	0.227848	0.639241	0.132911	0.356436	0.207921	0.583333	0.295082	1.77193	0.153285	158					EIF2AK1	0.227848	0.639241	0.132911					EIF2AK1	0.227848	0.639241	0.132911					EIF2AK1	0.356436	0.207921	0.583333					EIF2AK1	0.356436	0.583333	0.583333					EIF2AK1	0.295082	1.77193
ZC3H13	0.142191	0.724942	0.132867	0.196141	0.18328	0.934426	0.165761	2.63559	0.153226	429					ZC3H13	0.142191	0.724942	0.132867					ZC3H13	0.142191	0.724942	0.132867					ZC3H13	0.196141	0.18328	0.934426					ZC3H13	0.196141	0.934426	0.934426					ZC3H13	0.165761	2.63559
RBPJ	0.257812	0.609375	0.132812	0.423077	0.217949	0.515152	0.347368	1.56	0.153153	128					RBPJ	0.257812	0.609375	0.132812					RBPJ	0.257812	0.609375	0.132812					RBPJ	0.423077	0.217949	0.515152					RBPJ	0.423077	0.515152	0.515152					RBPJ	0.347368	1.56
SMARCD1	0.125	0.742188	0.132812	0.168421	0.178947	1.0625	0.142857	2.87879	0.153153	128					SMARCD1	0.125	0.742188	0.132812					SMARCD1	0.125	0.742188	0.132812					SMARCD1	0.168421	0.178947	1.0625	SMARCD1	0.168421	0.178947	1.0625									SMARCD1	0.142857	2.87879
TMEM232_ENST00000455884	0.159292	0.707965	0.132743	0.225	0.1875	0.833333	0.189474	2.42424	0.153061	113					TMEM232_ENST00000455884	0.159292	0.707965	0.132743					TMEM232_ENST00000455884	0.159292	0.707965	0.132743					TMEM232_ENST00000455884	0.225	0.1875	0.833333					TMEM232_ENST00000455884	0.225	0.833333	0.833333					TMEM232_ENST00000455884	0.189474	2.42424
GSK3B_ENST00000316626	0.100629	0.767296	0.132075	0.131148	0.172131	1.3125	0.111888	3.2973	0.152174	159					GSK3B_ENST00000316626	0.100629	0.767296	0.132075					GSK3B_ENST00000316626	0.100629	0.767296	0.132075					GSK3B_ENST00000316626	0.131148	0.172131	1.3125	GSK3B_ENST00000316626	0.131148	0.172131	1.3125									GSK3B_ENST00000316626	0.111888	3.2973
ACAP2	0.208333	0.659722	0.131944	0.315789	0.2	0.633333	0.263158	1.93878	0.152	144					ACAP2	0.208333	0.659722	0.131944					ACAP2	0.208333	0.659722	0.131944					ACAP2	0.315789	0.2	0.633333					ACAP2	0.315789	0.633333	0.633333					ACAP2	0.263158	1.93878
TAP2_ENST00000374897	0.22807	0.640351	0.131579	0.356164	0.205479	0.576923	0.295455	1.78049	0.151515	114					TAP2_ENST00000374897	0.22807	0.640351	0.131579					TAP2_ENST00000374897	0.22807	0.640351	0.131579					TAP2_ENST00000374897	0.356164	0.205479	0.576923					TAP2_ENST00000374897	0.356164	0.576923	0.576923					TAP2_ENST00000374897	0.295455	1.78049
FBXW7_ENST00000393956	0.00890869	0.859688	0.131403	0.0103627	0.15285	14.75	0.00898876	6.12698	0.151282	449					FBXW7_ENST00000393956	0.00890869	0.859688	0.131403					FBXW7_ENST00000393956	0.00890869	0.859688	0.131403					FBXW7_ENST00000393956	0.0103627	0.15285	14.75					FBXW7_ENST00000393956	0.0103627	14.75	14.75					FBXW7_ENST00000393956	0.00898876	6.12698
PPP1R21	0.227586	0.641379	0.131034	0.354839	0.204301	0.575758	0.294643	1.78846	0.150794	145					PPP1R21	0.227586	0.641379	0.131034					PPP1R21	0.227586	0.641379	0.131034					PPP1R21	0.354839	0.204301	0.575758					PPP1R21	0.354839	0.575758	0.575758					PPP1R21	0.294643	1.78846
MAX_ENST00000556979	0.0186916	0.850467	0.130841	0.021978	0.153846	7	0.0190476	5.6875	0.150538	107					MAX_ENST00000556979	0.0186916	0.850467	0.130841					MAX_ENST00000556979	0.0186916	0.850467	0.130841					MAX_ENST00000556979	0.021978	0.153846	7					MAX_ENST00000556979	0.021978	7	7					MAX_ENST00000556979	0.0190476	5.6875
EP300	0.0795974	0.78957	0.130833	0.100811	0.165701	1.64368	0.0864811	3.75217	0.150526	1093					EP300	0.0795974	0.78957	0.130833					EP300	0.0795974	0.78957	0.130833					EP300	0.100811	0.165701	1.64368					EP300	0.100811	1.64368	1.64368					EP300	0.0864811	3.75217
CCDC14_ENST00000488653	0.221591	0.647727	0.130682	0.342105	0.201754	0.589744	0.284672	1.83871	0.150327	176					CCDC14_ENST00000488653	0.221591	0.647727	0.130682					CCDC14_ENST00000488653	0.221591	0.647727	0.130682					CCDC14_ENST00000488653	0.342105	0.201754	0.589744					CCDC14_ENST00000488653	0.342105	0.589744	0.589744					CCDC14_ENST00000488653	0.284672	1.83871
SENP6_ENST00000370014	0.21118	0.658385	0.130435	0.320755	0.198113	0.617647	0.267717	1.92727	0.15	161					SENP6_ENST00000370014	0.21118	0.658385	0.130435					SENP6_ENST00000370014	0.21118	0.658385	0.130435					SENP6_ENST00000370014	0.320755	0.198113	0.617647					SENP6_ENST00000370014	0.320755	0.617647	0.617647					SENP6_ENST00000370014	0.267717	1.92727
C15orf33	0.198758	0.670807	0.130435	0.296296	0.194444	0.65625	0.248062	2.03774	0.15	161					C15orf33	0.198758	0.670807	0.130435					C15orf33	0.198758	0.670807	0.130435					C15orf33	0.296296	0.194444	0.65625					C15orf33	0.296296	0.65625	0.65625					C15orf33	0.248062	2.03774
ZNF548_ENST00000336128	0.268293	0.601626	0.130081	0.445946	0.216216	0.484848	0.366667	1.5102	0.149533	123					ZNF548_ENST00000336128	0.268293	0.601626	0.130081					ZNF548_ENST00000336128	0.268293	0.601626	0.130081					ZNF548_ENST00000336128	0.445946	0.216216	0.484848					ZNF548_ENST00000336128	0.445946	0.484848	0.484848					ZNF548_ENST00000336128	0.366667	1.5102
CDK12	0.137476	0.73258	0.129944	0.187661	0.177378	0.945205	0.159389	2.73944	0.149351	531					CDK12	0.137476	0.73258	0.129944					CDK12	0.137476	0.73258	0.129944					CDK12	0.187661	0.177378	0.945205	CDK12	0.187661	0.177378	0.945205									CDK12	0.159389	2.73944
ING1_ENST00000375774	0.188312	0.681818	0.12987	0.27619	0.190476	0.689655	0.232	2.14286	0.149254	154					ING1_ENST00000375774	0.188312	0.681818	0.12987					ING1_ENST00000375774	0.188312	0.681818	0.12987					ING1_ENST00000375774	0.27619	0.190476	0.689655					ING1_ENST00000375774	0.27619	0.689655	0.689655					ING1_ENST00000375774	0.232	2.14286
COLQ	0.222222	0.648148	0.12963	0.342857	0.2	0.583333	0.285714	1.84211	0.148936	108					COLQ	0.222222	0.648148	0.12963					COLQ	0.222222	0.648148	0.12963					COLQ	0.342857	0.2	0.583333					COLQ	0.342857	0.583333	0.583333					COLQ	0.285714	1.84211
CFI	0.236559	0.634409	0.129032	0.372881	0.20339	0.545455	0.309859	1.73529	0.148148	186					CFI	0.236559	0.634409	0.129032					CFI	0.236559	0.634409	0.129032					CFI	0.372881	0.20339	0.545455					CFI	0.372881	0.545455	0.545455					CFI	0.309859	1.73529
ZNRF3_ENST00000544604	0.217822	0.653465	0.128713	0.333333	0.19697	0.590909	0.278481	1.88571	0.147727	202					ZNRF3_ENST00000544604	0.217822	0.653465	0.128713					ZNRF3_ENST00000544604	0.217822	0.653465	0.128713					ZNRF3_ENST00000544604	0.333333	0.19697	0.590909					ZNRF3_ENST00000544604	0.333333	0.590909	0.590909					ZNRF3_ENST00000544604	0.278481	1.88571
ZNRF3	0.209524	0.661905	0.128571	0.316547	0.194245	0.613636	0.26506	1.95775	0.147541	210					ZNRF3	0.209524	0.661905	0.128571					ZNRF3	0.209524	0.661905	0.128571					ZNRF3	0.316547	0.194245	0.613636					ZNRF3	0.316547	0.613636	0.613636					ZNRF3	0.26506	1.95775
MORC4	0.175676	0.695946	0.128378	0.252427	0.184466	0.730769	0.213115	2.28889	0.147287	148					MORC4	0.175676	0.695946	0.128378					MORC4	0.175676	0.695946	0.128378					MORC4	0.252427	0.184466	0.730769					MORC4	0.252427	0.730769	0.730769					MORC4	0.213115	2.28889
RNF111	0.142857	0.729064	0.128079	0.195946	0.175676	0.896552	0.166667	2.69091	0.146893	203					RNF111	0.142857	0.729064	0.128079					RNF111	0.142857	0.729064	0.128079					RNF111	0.195946	0.175676	0.896552	RNF111	0.195946	0.175676	0.896552									RNF111	0.166667	2.69091
MYCBP2_ENST00000360084	0.186275	0.686275	0.127451	0.271429	0.185714	0.684211	0.228916	2.1875	0.146067	102					MYCBP2_ENST00000360084	0.186275	0.686275	0.127451					MYCBP2_ENST00000360084	0.186275	0.686275	0.127451					MYCBP2_ENST00000360084	0.271429	0.185714	0.684211					MYCBP2_ENST00000360084	0.271429	0.684211	0.684211					MYCBP2_ENST00000360084	0.228916	2.1875
CCAR1	0.122807	0.75	0.127193	0.163743	0.169591	1.03571	0.14	3	0.145729	228					CCAR1	0.122807	0.75	0.127193					CCAR1	0.122807	0.75	0.127193					CCAR1	0.163743	0.169591	1.03571	CCAR1	0.163743	0.169591	1.03571									CCAR1	0.14	3
PKD2	0.21547	0.657459	0.127072	0.327731	0.193277	0.589744	0.274648	1.91935	0.14557	181					PKD2	0.21547	0.657459	0.127072					PKD2	0.21547	0.657459	0.127072					PKD2	0.327731	0.193277	0.589744					PKD2	0.327731	0.589744	0.589744					PKD2	0.274648	1.91935
TSGA10	0.177665	0.695431	0.126904	0.255474	0.182482	0.714286	0.216049	2.28333	0.145349	197					TSGA10	0.177665	0.695431	0.126904					TSGA10	0.177665	0.695431	0.126904					TSGA10	0.255474	0.182482	0.714286					TSGA10	0.255474	0.714286	0.714286					TSGA10	0.216049	2.28333
EDIL3	0.165854	0.707317	0.126829	0.234483	0.17931	0.764706	0.19883	2.41667	0.145251	205					EDIL3	0.165854	0.707317	0.126829					EDIL3	0.165854	0.707317	0.126829					EDIL3	0.234483	0.17931	0.764706	EDIL3	0.234483	0.17931	0.764706									EDIL3	0.19883	2.41667
ZNF491	0.15534	0.718447	0.126214	0.216216	0.175676	0.8125	0.183908	2.55172	0.144444	103					ZNF491	0.15534	0.718447	0.126214					ZNF491	0.15534	0.718447	0.126214					ZNF491	0.216216	0.175676	0.8125	ZNF491	0.216216	0.175676	0.8125									ZNF491	0.183908	2.55172
RSRC2	0.135135	0.738739	0.126126	0.182927	0.170732	0.933333	0.15625	2.82759	0.14433	111					RSRC2	0.135135	0.738739	0.126126					RSRC2	0.135135	0.738739	0.126126					RSRC2	0.182927	0.170732	0.933333	RSRC2	0.182927	0.170732	0.933333									RSRC2	0.15625	2.82759
DAXX	0.162252	0.711921	0.125828	0.227907	0.176744	0.77551	0.193676	2.47126	0.143939	302					DAXX	0.162252	0.711921	0.125828					DAXX	0.162252	0.711921	0.125828					DAXX	0.227907	0.176744	0.77551	DAXX	0.227907	0.176744	0.77551									DAXX	0.193676	2.47126
CAPZA3	0.190789	0.684211	0.125	0.278846	0.182692	0.655172	0.235772	2.16667	0.142857	152					CAPZA3	0.190789	0.684211	0.125					CAPZA3	0.190789	0.684211	0.125					CAPZA3	0.278846	0.182692	0.655172					CAPZA3	0.278846	0.655172	0.655172					CAPZA3	0.235772	2.16667
FAM126A	0.183333	0.691667	0.125	0.26506	0.180723	0.681818	0.22449	2.24324	0.142857	120					FAM126A	0.183333	0.691667	0.125					FAM126A	0.183333	0.691667	0.125					FAM126A	0.26506	0.180723	0.681818					FAM126A	0.26506	0.681818	0.681818					FAM126A	0.22449	2.24324
FGD4	0.197368	0.677632	0.125	0.291262	0.184466	0.633333	0.245902	2.10204	0.142857	152					FGD4	0.197368	0.677632	0.125					FGD4	0.197368	0.677632	0.125					FGD4	0.291262	0.184466	0.633333					FGD4	0.291262	0.633333	0.633333					FGD4	0.245902	2.10204
GNPTAB	0.212963	0.662037	0.125	0.321678	0.188811	0.586957	0.270588	1.9589	0.142857	216					GNPTAB	0.212963	0.662037	0.125					GNPTAB	0.212963	0.662037	0.125					GNPTAB	0.321678	0.188811	0.586957					GNPTAB	0.321678	0.586957	0.586957					GNPTAB	0.270588	1.9589
KIAA1267	0.202206	0.672794	0.125	0.300546	0.185792	0.618182	0.253456	2.05618	0.142857	272					KIAA1267	0.202206	0.672794	0.125					KIAA1267	0.202206	0.672794	0.125					KIAA1267	0.300546	0.185792	0.618182					KIAA1267	0.300546	0.618182	0.618182					KIAA1267	0.253456	2.05618
TCEB3C	0.230769	0.644231	0.125	0.358209	0.19403	0.541667	0.3	1.81081	0.142857	104					TCEB3C	0.230769	0.644231	0.125					TCEB3C	0.230769	0.644231	0.125					TCEB3C	0.358209	0.19403	0.541667					TCEB3C	0.358209	0.541667	0.541667					TCEB3C	0.3	1.81081
ARID1B_ENST00000346085	0.142322	0.732834	0.124844	0.194208	0.170358	0.877193	0.165939	2.74299	0.142653	801					ARID1B_ENST00000346085	0.142322	0.732834	0.124844					ARID1B_ENST00000346085	0.142322	0.732834	0.124844					ARID1B_ENST00000346085	0.194208	0.170358	0.877193	ARID1B_ENST00000346085	0.194208	0.170358	0.877193									ARID1B_ENST00000346085	0.165939	2.74299
SENP6_ENST00000447266	0.220339	0.655367	0.124294	0.336207	0.189655	0.564103	0.282609	1.90164	0.141935	177					SENP6_ENST00000447266	0.220339	0.655367	0.124294					SENP6_ENST00000447266	0.220339	0.655367	0.124294					SENP6_ENST00000447266	0.336207	0.189655	0.564103					SENP6_ENST00000447266	0.336207	0.564103	0.564103					SENP6_ENST00000447266	0.282609	1.90164
EFHA2	0.109489	0.766423	0.124088	0.142857	0.161905	1.13333	0.122951	3.28125	0.141667	137					EFHA2	0.109489	0.766423	0.124088					EFHA2	0.109489	0.766423	0.124088					EFHA2	0.142857	0.161905	1.13333	EFHA2	0.142857	0.161905	1.13333									EFHA2	0.122951	3.28125
NGLY1_ENST00000428257	0.153285	0.722628	0.124088	0.212121	0.171717	0.809524	0.181034	2.60526	0.141667	137					NGLY1_ENST00000428257	0.153285	0.722628	0.124088					NGLY1_ENST00000428257	0.153285	0.722628	0.124088					NGLY1_ENST00000428257	0.212121	0.171717	0.809524	NGLY1_ENST00000428257	0.212121	0.171717	0.809524									NGLY1_ENST00000428257	0.181034	2.60526
ZNF136	0.132231	0.743802	0.123967	0.177778	0.166667	0.9375	0.152381	2.90323	0.141509	121					ZNF136	0.132231	0.743802	0.123967					ZNF136	0.132231	0.743802	0.123967					ZNF136	0.177778	0.166667	0.9375	ZNF136	0.177778	0.166667	0.9375									ZNF136	0.152381	2.90323
TGFBR2	0.0665138	0.809633	0.123853	0.082153	0.152975	1.86207	0.0712531	4.25301	0.141361	436					TGFBR2	0.0665138	0.809633	0.123853					TGFBR2	0.0665138	0.809633	0.123853					TGFBR2	0.082153	0.152975	1.86207					TGFBR2	0.082153	1.86207	1.86207					TGFBR2	0.0712531	4.25301
SCAF4	0.156352	0.71987	0.123779	0.217195	0.171946	0.791667	0.185328	2.56977	0.141264	307					SCAF4	0.156352	0.71987	0.123779					SCAF4	0.156352	0.71987	0.123779					SCAF4	0.217195	0.171946	0.791667	SCAF4	0.217195	0.171946	0.791667									SCAF4	0.185328	2.56977
TRIM37	0.175258	0.701031	0.123711	0.25	0.176471	0.705882	0.2125	2.34483	0.141176	194					TRIM37	0.175258	0.701031	0.123711					TRIM37	0.175258	0.701031	0.123711					TRIM37	0.25	0.176471	0.705882	TRIM37	0.25	0.176471	0.705882									TRIM37	0.2125	2.34483
RUNX1	0.1	0.776316	0.123684	0.128814	0.159322	1.23684	0.111111	3.47059	0.141141	380					RUNX1	0.1	0.776316	0.123684					RUNX1	0.1	0.776316	0.123684					RUNX1	0.128814	0.159322	1.23684	RUNX1	0.128814	0.159322	1.23684									RUNX1	0.111111	3.47059
PPP6C	0.0823529	0.794118	0.123529	0.103704	0.155556	1.5	0.0897436	3.85714	0.14094	170					PPP6C	0.0823529	0.794118	0.123529					PPP6C	0.0823529	0.794118	0.123529					PPP6C	0.103704	0.155556	1.5					PPP6C	0.103704	1.5	1.5					PPP6C	0.0897436	3.85714
DYRK1A	0.300412	0.576132	0.123457	0.521429	0.214286	0.410959	0.429412	1.35922	0.140845	243					DYRK1A	0.300412	0.576132	0.123457					DYRK1A	0.300412	0.576132	0.123457					DYRK1A	0.521429	0.214286	0.410959					DYRK1A	0.521429	0.410959	0.410959					DYRK1A	0.429412	1.35922
SAMSN1	0.179012	0.697531	0.123457	0.256637	0.176991	0.689655	0.218045	2.30612	0.140845	162					SAMSN1	0.179012	0.697531	0.123457					SAMSN1	0.179012	0.697531	0.123457					SAMSN1	0.256637	0.176991	0.689655	SAMSN1	0.256637	0.176991	0.689655									SAMSN1	0.218045	2.30612
G2E3	0.144928	0.731884	0.123188	0.19802	0.168317	0.85	0.169492	2.72973	0.140496	138					G2E3	0.144928	0.731884	0.123188					G2E3	0.144928	0.731884	0.123188					G2E3	0.19802	0.168317	0.85	G2E3	0.19802	0.168317	0.85									G2E3	0.169492	2.72973
LUZP1	0.194872	0.682051	0.123077	0.285714	0.180451	0.631579	0.242038	2.14516	0.140351	195					LUZP1	0.194872	0.682051	0.123077					LUZP1	0.194872	0.682051	0.123077					LUZP1	0.285714	0.180451	0.631579					LUZP1	0.285714	0.631579	0.631579					LUZP1	0.242038	2.14516
NOTCH2	0.115044	0.762045	0.122911	0.150968	0.16129	1.06838	0.13	3.20248	0.140135	1017					NOTCH2	0.115044	0.762045	0.122911					NOTCH2	0.115044	0.762045	0.122911					NOTCH2	0.150968	0.16129	1.06838	NOTCH2	0.150968	0.16129	1.06838									NOTCH2	0.13	3.20248
MAX_ENST00000284165	0.0263158	0.850877	0.122807	0.0309278	0.14433	4.66667	0.027027	5.70588	0.14	114					MAX_ENST00000284165	0.0263158	0.850877	0.122807					MAX_ENST00000284165	0.0263158	0.850877	0.122807					MAX_ENST00000284165	0.0309278	0.14433	4.66667					MAX_ENST00000284165	0.0309278	4.66667	4.66667					MAX_ENST00000284165	0.027027	5.70588
KDM5C	0.121053	0.75614	0.122807	0.160093	0.162413	1.01449	0.137725	3.10072	0.14	570					KDM5C	0.121053	0.75614	0.122807					KDM5C	0.121053	0.75614	0.122807					KDM5C	0.160093	0.162413	1.01449	KDM5C	0.160093	0.162413	1.01449									KDM5C	0.137725	3.10072
CCDC14	0.23741	0.640288	0.122302	0.370787	0.191011	0.515152	0.311321	1.78	0.139344	139					CCDC14	0.23741	0.640288	0.122302					CCDC14	0.23741	0.640288	0.122302					CCDC14	0.370787	0.191011	0.515152					CCDC14	0.370787	0.515152	0.515152					CCDC14	0.311321	1.78
RNF111_ENST00000434298	0.142132	0.736041	0.121827	0.193103	0.165517	0.857143	0.16568	2.78846	0.138728	197					RNF111_ENST00000434298	0.142132	0.736041	0.121827					RNF111_ENST00000434298	0.142132	0.736041	0.121827					RNF111_ENST00000434298	0.193103	0.165517	0.857143	RNF111_ENST00000434298	0.193103	0.165517	0.857143									RNF111_ENST00000434298	0.16568	2.78846
USP9X_ENST00000324545	0.163717	0.714602	0.121681	0.229102	0.170279	0.743243	0.195767	2.50388	0.138539	452					USP9X_ENST00000324545	0.163717	0.714602	0.121681					USP9X_ENST00000324545	0.163717	0.714602	0.121681					USP9X_ENST00000324545	0.229102	0.170279	0.743243	USP9X_ENST00000324545	0.229102	0.170279	0.743243									USP9X_ENST00000324545	0.195767	2.50388
USP9X	0.168443	0.710021	0.121535	0.237237	0.171171	0.721519	0.202564	2.44853	0.13835	469					USP9X	0.168443	0.710021	0.121535					USP9X	0.168443	0.710021	0.121535					USP9X	0.237237	0.171171	0.721519	USP9X	0.237237	0.171171	0.721519									USP9X	0.202564	2.44853
MAX	0.0571429	0.821429	0.121429	0.0695652	0.147826	2.125	0.0606061	4.6	0.138211	140					MAX	0.0571429	0.821429	0.121429					MAX	0.0571429	0.821429	0.121429					MAX	0.0695652	0.147826	2.125					MAX	0.0695652	2.125	2.125					MAX	0.0606061	4.6
PPP6C_ENST00000451402	0.0787879	0.8	0.121212	0.0984848	0.151515	1.53846	0.0855263	4	0.137931	165					PPP6C_ENST00000451402	0.0787879	0.8	0.121212					PPP6C_ENST00000451402	0.0787879	0.8	0.121212					PPP6C_ENST00000451402	0.0984848	0.151515	1.53846					PPP6C_ENST00000451402	0.0984848	1.53846	1.53846					PPP6C_ENST00000451402	0.0855263	4
GCFC1	0.184211	0.694737	0.121053	0.265152	0.174242	0.657143	0.225806	2.27586	0.137725	190					GCFC1	0.184211	0.694737	0.121053					GCFC1	0.184211	0.694737	0.121053					GCFC1	0.265152	0.174242	0.657143	GCFC1	0.265152	0.174242	0.657143									GCFC1	0.225806	2.27586
SLC35F1	0.261146	0.617834	0.121019	0.42268	0.195876	0.463415	0.353448	1.61667	0.137681	157					SLC35F1	0.261146	0.617834	0.121019					SLC35F1	0.261146	0.617834	0.121019					SLC35F1	0.42268	0.195876	0.463415					SLC35F1	0.42268	0.463415	0.463415					SLC35F1	0.353448	1.61667
ZNF853	0.241935	0.637097	0.120968	0.379747	0.189873	0.5	0.319149	1.75556	0.137615	124					ZNF853	0.241935	0.637097	0.120968					ZNF853	0.241935	0.637097	0.120968					ZNF853	0.379747	0.189873	0.5					ZNF853	0.379747	0.5	0.5					ZNF853	0.319149	1.75556
ZNF853_ENST00000457543	0.241935	0.637097	0.120968	0.379747	0.189873	0.5	0.319149	1.75556	0.137615	124					ZNF853_ENST00000457543	0.241935	0.637097	0.120968					ZNF853_ENST00000457543	0.241935	0.637097	0.120968					ZNF853_ENST00000457543	0.379747	0.189873	0.5					ZNF853_ENST00000457543	0.379747	0.5	0.5					ZNF853_ENST00000457543	0.319149	1.75556
FTSJD1	0.147651	0.731544	0.120805	0.201835	0.165138	0.818182	0.173228	2.725	0.137405	149					FTSJD1	0.147651	0.731544	0.120805					FTSJD1	0.147651	0.731544	0.120805					FTSJD1	0.201835	0.165138	0.818182	FTSJD1	0.201835	0.165138	0.818182									FTSJD1	0.173228	2.725
TARS	0.131429	0.748571	0.12	0.175573	0.160305	0.913043	0.151316	2.97727	0.136364	175					TARS	0.131429	0.748571	0.12					TARS	0.131429	0.748571	0.12					TARS	0.175573	0.160305	0.913043	TARS	0.175573	0.160305	0.913043									TARS	0.151316	2.97727
TNFSF11	0.21	0.67	0.12	0.313433	0.179104	0.571429	0.265823	2.0303	0.136364	100					TNFSF11	0.21	0.67	0.12					TNFSF11	0.21	0.67	0.12					TNFSF11	0.313433	0.179104	0.571429	TNFSF11	0.313433	0.179104	0.571429									TNFSF11	0.265823	2.0303
TCF25_ENST00000263347	0.302752	0.577982	0.119266	0.52381	0.206349	0.393939	0.434211	1.36957	0.135417	109					TCF25_ENST00000263347	0.302752	0.577982	0.119266					TCF25_ENST00000263347	0.302752	0.577982	0.119266					TCF25_ENST00000263347	0.52381	0.206349	0.393939					TCF25_ENST00000263347	0.52381	0.393939	0.393939					TCF25_ENST00000263347	0.434211	1.36957
UGT2B17	0.206349	0.674603	0.119048	0.305882	0.176471	0.576923	0.26	2.07317	0.135135	126					UGT2B17	0.206349	0.674603	0.119048					UGT2B17	0.206349	0.674603	0.119048					UGT2B17	0.305882	0.176471	0.576923	UGT2B17	0.305882	0.176471	0.576923									UGT2B17	0.26	2.07317
DHX16	0.217822	0.663366	0.118812	0.328358	0.179104	0.545455	0.278481	1.97059	0.134831	202					DHX16	0.217822	0.663366	0.118812					DHX16	0.217822	0.663366	0.118812					DHX16	0.328358	0.179104	0.545455	DHX16	0.328358	0.179104	0.545455									DHX16	0.278481	1.97059
PAN3	0.19375	0.6875	0.11875	0.281818	0.172727	0.612903	0.24031	2.2	0.134752	160					PAN3	0.19375	0.6875	0.11875					PAN3	0.19375	0.6875	0.11875					PAN3	0.281818	0.172727	0.612903	PAN3	0.281818	0.172727	0.612903									PAN3	0.24031	2.2
MPP5	0.177966	0.70339	0.118644	0.253012	0.168675	0.666667	0.216495	2.37143	0.134615	118					MPP5	0.177966	0.70339	0.118644					MPP5	0.177966	0.70339	0.118644					MPP5	0.253012	0.168675	0.666667	MPP5	0.253012	0.168675	0.666667									MPP5	0.216495	2.37143
KDM5C_ENST00000452825	0.122845	0.758621	0.118534	0.161932	0.15625	0.964912	0.140049	3.14286	0.134474	464					KDM5C_ENST00000452825	0.122845	0.758621	0.118534					KDM5C_ENST00000452825	0.122845	0.758621	0.118534					KDM5C_ENST00000452825	0.161932	0.15625	0.964912	KDM5C_ENST00000452825	0.161932	0.15625	0.964912									KDM5C_ENST00000452825	0.140049	3.14286
BIN2	0.242604	0.639053	0.118343	0.37963	0.185185	0.487805	0.320312	1.77049	0.134228	169					BIN2	0.242604	0.639053	0.118343					BIN2	0.242604	0.639053	0.118343					BIN2	0.37963	0.185185	0.487805					BIN2	0.37963	0.487805	0.487805					BIN2	0.320312	1.77049
ZNF418	0.2	0.681818	0.118182	0.293333	0.173333	0.590909	0.25	2.14286	0.134021	220					ZNF418	0.2	0.681818	0.118182					ZNF418	0.2	0.681818	0.118182					ZNF418	0.293333	0.173333	0.590909	ZNF418	0.293333	0.173333	0.590909									ZNF418	0.25	2.14286
VPS53	0.19685	0.685039	0.11811	0.287356	0.172414	0.6	0.245098	2.175	0.133929	127					VPS53	0.19685	0.685039	0.11811					VPS53	0.19685	0.685039	0.11811					VPS53	0.287356	0.172414	0.6	VPS53	0.287356	0.172414	0.6									VPS53	0.245098	2.175
MCM6	0.217391	0.664596	0.118012	0.327103	0.17757	0.542857	0.277778	1.98148	0.133803	161					MCM6	0.217391	0.664596	0.118012					MCM6	0.217391	0.664596	0.118012					MCM6	0.327103	0.17757	0.542857	MCM6	0.327103	0.17757	0.542857									MCM6	0.277778	1.98148
SPTY2D1	0.192547	0.689441	0.118012	0.279279	0.171171	0.612903	0.238462	2.22	0.133803	161					SPTY2D1	0.192547	0.689441	0.118012					SPTY2D1	0.192547	0.689441	0.118012					SPTY2D1	0.279279	0.171171	0.612903	SPTY2D1	0.279279	0.171171	0.612903									SPTY2D1	0.238462	2.22
RNF20	0.174157	0.707865	0.117978	0.246032	0.166667	0.677419	0.210884	2.42308	0.133758	178					RNF20	0.174157	0.707865	0.117978					RNF20	0.174157	0.707865	0.117978					RNF20	0.246032	0.166667	0.677419	RNF20	0.246032	0.166667	0.677419									RNF20	0.210884	2.42308
TCEA3	0.156863	0.72549	0.117647	0.216216	0.162162	0.75	0.186047	2.64286	0.133333	102					TCEA3	0.156863	0.72549	0.117647					TCEA3	0.156863	0.72549	0.117647					TCEA3	0.216216	0.162162	0.75	TCEA3	0.216216	0.162162	0.75									TCEA3	0.186047	2.64286
PAN3_ENST00000380958	0.178771	0.703911	0.117318	0.253968	0.166667	0.65625	0.217687	2.37736	0.132911	179					PAN3_ENST00000380958	0.178771	0.703911	0.117318					PAN3_ENST00000380958	0.178771	0.703911	0.117318					PAN3_ENST00000380958	0.253968	0.166667	0.65625	PAN3_ENST00000380958	0.253968	0.166667	0.65625									PAN3_ENST00000380958	0.217687	2.37736
CCDC102B_ENST00000584156	0.185185	0.697531	0.117284	0.265487	0.168142	0.633333	0.227273	2.30612	0.132867	162					CCDC102B_ENST00000584156	0.185185	0.697531	0.117284					CCDC102B_ENST00000584156	0.185185	0.697531	0.117284					CCDC102B_ENST00000584156	0.265487	0.168142	0.633333	CCDC102B_ENST00000584156	0.265487	0.168142	0.633333									CCDC102B_ENST00000584156	0.227273	2.30612
IL1RAPL1	0.222642	0.660377	0.116981	0.337143	0.177143	0.525424	0.286408	1.94444	0.132479	265					IL1RAPL1	0.222642	0.660377	0.116981					IL1RAPL1	0.222642	0.660377	0.116981					IL1RAPL1	0.337143	0.177143	0.525424	IL1RAPL1	0.337143	0.177143	0.525424									IL1RAPL1	0.286408	1.94444
MGAM	0.175	0.708333	0.116667	0.247059	0.164706	0.666667	0.212121	2.42857	0.132075	120					MGAM	0.175	0.708333	0.116667					MGAM	0.175	0.708333	0.116667					MGAM	0.247059	0.164706	0.666667	MGAM	0.247059	0.164706	0.666667									MGAM	0.212121	2.42857
NAPRT1_ENST00000449291	0.174757	0.708738	0.116505	0.246575	0.164384	0.666667	0.211765	2.43333	0.131868	103					NAPRT1_ENST00000449291	0.174757	0.708738	0.116505					NAPRT1_ENST00000449291	0.174757	0.708738	0.116505					NAPRT1_ENST00000449291	0.246575	0.164384	0.666667	NAPRT1_ENST00000449291	0.246575	0.164384	0.666667									NAPRT1_ENST00000449291	0.211765	2.43333
TNFRSF14_ENST00000355716	0.106796	0.776699	0.116505	0.1375	0.15	1.09091	0.119565	3.47826	0.131868	103					TNFRSF14_ENST00000355716	0.106796	0.776699	0.116505					TNFRSF14_ENST00000355716	0.106796	0.776699	0.116505					TNFRSF14_ENST00000355716	0.1375	0.15	1.09091	TNFRSF14_ENST00000355716	0.1375	0.15	1.09091									TNFRSF14_ENST00000355716	0.119565	3.47826
USP7	0.188679	0.694969	0.116352	0.271493	0.167421	0.616667	0.232558	2.27835	0.131673	318					USP7	0.188679	0.694969	0.116352					USP7	0.188679	0.694969	0.116352					USP7	0.271493	0.167421	0.616667	USP7	0.271493	0.167421	0.616667									USP7	0.232558	2.27835
MLLT4_ENST00000392108	0.163435	0.720222	0.116343	0.226923	0.161538	0.711864	0.195364	2.57426	0.131661	361					MLLT4_ENST00000392108	0.163435	0.720222	0.116343					MLLT4_ENST00000392108	0.163435	0.720222	0.116343					MLLT4_ENST00000392108	0.226923	0.161538	0.711864	MLLT4_ENST00000392108	0.226923	0.161538	0.711864									MLLT4_ENST00000392108	0.195364	2.57426
TNFRSF11B	0.24031	0.643411	0.116279	0.373494	0.180723	0.483871	0.316327	1.80435	0.131579	129					TNFRSF11B	0.24031	0.643411	0.116279					TNFRSF11B	0.24031	0.643411	0.116279					TNFRSF11B	0.373494	0.180723	0.483871					TNFRSF11B	0.373494	0.483871	0.483871					TNFRSF11B	0.316327	1.80435
ZNF441	0.178295	0.705426	0.116279	0.252747	0.164835	0.652174	0.216981	2.39474	0.131579	129					ZNF441	0.178295	0.705426	0.116279					ZNF441	0.178295	0.705426	0.116279					ZNF441	0.252747	0.164835	0.652174	ZNF441	0.252747	0.164835	0.652174									ZNF441	0.216981	2.39474
CLSPN	0.166667	0.717172	0.116162	0.232394	0.161972	0.69697	0.2	2.53571	0.131429	198					CLSPN	0.166667	0.717172	0.116162					CLSPN	0.166667	0.717172	0.116162					CLSPN	0.232394	0.161972	0.69697	CLSPN	0.232394	0.161972	0.69697									CLSPN	0.2	2.53571
ZNF23	0.232143	0.651786	0.116071	0.356164	0.178082	0.5	0.302326	1.87179	0.131313	112					ZNF23	0.232143	0.651786	0.116071					ZNF23	0.232143	0.651786	0.116071					ZNF23	0.356164	0.178082	0.5	ZNF23	0.356164	0.178082	0.5									ZNF23	0.302326	1.87179
CNTN6	0.187713	0.696246	0.116041	0.269608	0.166667	0.618182	0.231092	2.29213	0.131274	586					CNTN6	0.187713	0.696246	0.116041					CNTN6	0.187713	0.696246	0.116041					CNTN6	0.269608	0.166667	0.618182	CNTN6	0.269608	0.166667	0.618182									CNTN6	0.231092	2.29213
KCTD3	0.160221	0.723757	0.116022	0.221374	0.160305	0.724138	0.190789	2.62	0.13125	181					KCTD3	0.160221	0.723757	0.116022					KCTD3	0.160221	0.723757	0.116022					KCTD3	0.221374	0.160305	0.724138	KCTD3	0.221374	0.160305	0.724138									KCTD3	0.190789	2.62
TNRC6B	0.278997	0.605016	0.115987	0.46114	0.19171	0.41573	0.386957	1.53175	0.131206	319					TNRC6B	0.278997	0.605016	0.115987					TNRC6B	0.278997	0.605016	0.115987					TNRC6B	0.46114	0.19171	0.41573					TNRC6B	0.46114	0.41573	0.41573					TNRC6B	0.386957	1.53175
MCM7	0.26087	0.623188	0.115942	0.418605	0.186047	0.444444	0.352941	1.65385	0.131148	138					MCM7	0.26087	0.623188	0.115942					MCM7	0.26087	0.623188	0.115942					MCM7	0.418605	0.186047	0.444444					MCM7	0.418605	0.444444	0.444444					MCM7	0.352941	1.65385
PRKAR1A	0.166667	0.717391	0.115942	0.232323	0.161616	0.695652	0.2	2.53846	0.131148	138					PRKAR1A	0.166667	0.717391	0.115942					PRKAR1A	0.166667	0.717391	0.115942					PRKAR1A	0.232323	0.161616	0.695652	PRKAR1A	0.232323	0.161616	0.695652									PRKAR1A	0.2	2.53846
CLSPN_ENST00000251195	0.157895	0.726316	0.115789	0.217391	0.15942	0.733333	0.1875	2.65385	0.130952	190					CLSPN_ENST00000251195	0.157895	0.726316	0.115789					CLSPN_ENST00000251195	0.157895	0.726316	0.115789					CLSPN_ENST00000251195	0.217391	0.15942	0.733333	CLSPN_ENST00000251195	0.217391	0.15942	0.733333									CLSPN_ENST00000251195	0.1875	2.65385
MALT1_ENST00000348428	0.126316	0.757895	0.115789	0.166667	0.152778	0.916667	0.144578	3.13043	0.130952	190					MALT1_ENST00000348428	0.126316	0.757895	0.115789					MALT1_ENST00000348428	0.126316	0.757895	0.115789					MALT1_ENST00000348428	0.166667	0.152778	0.916667	MALT1_ENST00000348428	0.166667	0.152778	0.916667									MALT1_ENST00000348428	0.144578	3.13043
RSF1	0.155235	0.729242	0.115523	0.212871	0.158416	0.744186	0.183761	2.69333	0.130612	277					RSF1	0.155235	0.729242	0.115523					RSF1	0.155235	0.729242	0.115523					RSF1	0.212871	0.158416	0.744186	RSF1	0.212871	0.158416	0.744186									RSF1	0.183761	2.69333
MTF2	0.125	0.759615	0.115385	0.164557	0.151899	0.923077	0.142857	3.16	0.130435	104					MTF2	0.125	0.759615	0.115385					MTF2	0.125	0.759615	0.115385					MTF2	0.164557	0.151899	0.923077	MTF2	0.164557	0.151899	0.923077									MTF2	0.142857	3.16
RBM45	0.211538	0.673077	0.115385	0.314286	0.171429	0.545455	0.268293	2.05882	0.130435	104					RBM45	0.211538	0.673077	0.115385					RBM45	0.211538	0.673077	0.115385					RBM45	0.314286	0.171429	0.545455	RBM45	0.314286	0.171429	0.545455									RBM45	0.268293	2.05882
STAT2	0.307692	0.576923	0.115385	0.533333	0.2	0.375	0.444444	1.36364	0.130435	156					STAT2	0.307692	0.576923	0.115385					STAT2	0.307692	0.576923	0.115385					STAT2	0.533333	0.2	0.375					STAT2	0.533333	0.375	0.375					STAT2	0.444444	1.36364
C12orf4	0.201923	0.682692	0.115385	0.295775	0.169014	0.571429	0.253012	2.15152	0.130435	104					C12orf4	0.201923	0.682692	0.115385					C12orf4	0.201923	0.682692	0.115385					C12orf4	0.295775	0.169014	0.571429	C12orf4	0.295775	0.169014	0.571429									C12orf4	0.253012	2.15152
CCDC6	0.144231	0.740385	0.115385	0.194805	0.155844	0.8	0.168539	2.85185	0.130435	104					CCDC6	0.144231	0.740385	0.115385					CCDC6	0.144231	0.740385	0.115385					CCDC6	0.194805	0.155844	0.8	CCDC6	0.194805	0.155844	0.8									CCDC6	0.168539	2.85185
PDS5B	0.174216	0.710801	0.114983	0.245098	0.161765	0.66	0.21097	2.45783	0.129921	287					PDS5B	0.174216	0.710801	0.114983					PDS5B	0.174216	0.710801	0.114983					PDS5B	0.245098	0.161765	0.66	PDS5B	0.245098	0.161765	0.66									PDS5B	0.21097	2.45783
DHX16_ENST00000376442	0.229665	0.655502	0.114833	0.350365	0.175182	0.5	0.298137	1.90278	0.12973	209					DHX16_ENST00000376442	0.229665	0.655502	0.114833					DHX16_ENST00000376442	0.229665	0.655502	0.114833					DHX16_ENST00000376442	0.350365	0.175182	0.5	DHX16_ENST00000376442	0.350365	0.175182	0.5									DHX16_ENST00000376442	0.298137	1.90278
OFD1	0.151376	0.733945	0.114679	0.20625	0.15625	0.757576	0.178378	2.75862	0.129534	218					OFD1	0.151376	0.733945	0.114679					OFD1	0.151376	0.733945	0.114679					OFD1	0.20625	0.15625	0.757576	OFD1	0.20625	0.15625	0.757576									OFD1	0.178378	2.75862
IL1RAPL1_ENST00000378993	0.221374	0.664122	0.114504	0.333333	0.172414	0.517241	0.284314	1.97727	0.12931	262					IL1RAPL1_ENST00000378993	0.221374	0.664122	0.114504					IL1RAPL1_ENST00000378993	0.221374	0.664122	0.114504					IL1RAPL1_ENST00000378993	0.333333	0.172414	0.517241	IL1RAPL1_ENST00000378993	0.333333	0.172414	0.517241									IL1RAPL1_ENST00000378993	0.284314	1.97727
ATF6	0.221429	0.664286	0.114286	0.333333	0.172043	0.516129	0.284404	1.97872	0.129032	140					ATF6	0.221429	0.664286	0.114286					ATF6	0.221429	0.664286	0.114286					ATF6	0.333333	0.172043	0.516129	ATF6	0.333333	0.172043	0.516129									ATF6	0.284404	1.97872
NXF1	0.21519	0.670886	0.113924	0.320755	0.169811	0.529412	0.274194	2.03846	0.128571	158					NXF1	0.21519	0.670886	0.113924					NXF1	0.21519	0.670886	0.113924					NXF1	0.320755	0.169811	0.529412	NXF1	0.320755	0.169811	0.529412									NXF1	0.274194	2.03846
IL1RAP_ENST00000443369	0.212766	0.673759	0.113475	0.315789	0.168421	0.533333	0.27027	2.06522	0.128	141					IL1RAP_ENST00000443369	0.212766	0.673759	0.113475					IL1RAP_ENST00000443369	0.212766	0.673759	0.113475					IL1RAP_ENST00000443369	0.315789	0.168421	0.533333	IL1RAP_ENST00000443369	0.315789	0.168421	0.533333									IL1RAP_ENST00000443369	0.27027	2.06522
GOLGA5_ENST00000163416	0.126667	0.76	0.113333	0.166667	0.149123	0.894737	0.145038	3.16667	0.12782	150					GOLGA5_ENST00000163416	0.126667	0.76	0.113333					GOLGA5_ENST00000163416	0.126667	0.76	0.113333					GOLGA5_ENST00000163416	0.166667	0.149123	0.894737	GOLGA5_ENST00000163416	0.166667	0.149123	0.894737									GOLGA5_ENST00000163416	0.145038	3.16667
TAOK1_ENST00000261716	0.152709	0.73399	0.1133	0.208054	0.154362	0.741935	0.180233	2.75926	0.127778	203					TAOK1_ENST00000261716	0.152709	0.73399	0.1133					TAOK1_ENST00000261716	0.152709	0.73399	0.1133					TAOK1_ENST00000261716	0.208054	0.154362	0.741935	TAOK1_ENST00000261716	0.208054	0.154362	0.741935									TAOK1_ENST00000261716	0.180233	2.75926
EPYC	0.235849	0.650943	0.113208	0.362319	0.173913	0.48	0.308642	1.86486	0.12766	106					EPYC	0.235849	0.650943	0.113208					EPYC	0.235849	0.650943	0.113208					EPYC	0.362319	0.173913	0.48	EPYC	0.362319	0.173913	0.48									EPYC	0.308642	1.86486
SASS6	0.191304	0.695652	0.113043	0.275	0.1625	0.590909	0.236559	2.28571	0.127451	115					SASS6	0.191304	0.695652	0.113043					SASS6	0.191304	0.695652	0.113043					SASS6	0.275	0.1625	0.590909	SASS6	0.275	0.1625	0.590909									SASS6	0.236559	2.28571
STIP1	0.165217	0.721739	0.113043	0.228916	0.156627	0.684211	0.197917	2.59375	0.127451	115					STIP1	0.165217	0.721739	0.113043					STIP1	0.165217	0.721739	0.113043					STIP1	0.228916	0.156627	0.684211	STIP1	0.228916	0.156627	0.684211									STIP1	0.197917	2.59375
ZNF215	0.16129	0.725806	0.112903	0.222222	0.155556	0.7	0.192308	2.64706	0.127273	186					ZNF215	0.16129	0.725806	0.112903					ZNF215	0.16129	0.725806	0.112903					ZNF215	0.222222	0.155556	0.7	ZNF215	0.222222	0.155556	0.7									ZNF215	0.192308	2.64706
CHRDL1	0.218045	0.669173	0.112782	0.325843	0.168539	0.517241	0.278846	2.02273	0.127119	133					CHRDL1	0.218045	0.669173	0.112782					CHRDL1	0.218045	0.669173	0.112782					CHRDL1	0.325843	0.168539	0.517241	CHRDL1	0.325843	0.168539	0.517241									CHRDL1	0.278846	2.02273
AHCTF1	0.196078	0.691176	0.112745	0.283688	0.163121	0.575	0.243902	2.2381	0.127072	408					AHCTF1	0.196078	0.691176	0.112745					AHCTF1	0.196078	0.691176	0.112745					AHCTF1	0.283688	0.163121	0.575	AHCTF1	0.283688	0.163121	0.575									AHCTF1	0.243902	2.2381
WAC	0.301775	0.585799	0.112426	0.515152	0.191919	0.372549	0.432203	1.41429	0.126667	169					WAC	0.301775	0.585799	0.112426					WAC	0.301775	0.585799	0.112426					WAC	0.515152	0.191919	0.372549					WAC	0.515152	0.372549	0.372549					WAC	0.432203	1.41429
MLL4	0.215088	0.672552	0.11236	0.319809	0.167064	0.522388	0.274029	2.05392	0.126582	623					MLL4	0.215088	0.672552	0.11236					MLL4	0.215088	0.672552	0.11236					MLL4	0.319809	0.167064	0.522388	MLL4	0.319809	0.167064	0.522388									MLL4	0.274029	2.05392
ATF7IP	0.19802	0.689769	0.112211	0.287081	0.162679	0.566667	0.246914	2.2234	0.126394	303					ATF7IP	0.19802	0.689769	0.112211					ATF7IP	0.19802	0.689769	0.112211					ATF7IP	0.287081	0.162679	0.566667	ATF7IP	0.287081	0.162679	0.566667									ATF7IP	0.246914	2.2234
NAPRT1_ENST00000276844	0.205607	0.682243	0.11215	0.30137	0.164384	0.545455	0.258824	2.14706	0.126316	107					NAPRT1_ENST00000276844	0.205607	0.682243	0.11215					NAPRT1_ENST00000276844	0.205607	0.682243	0.11215					NAPRT1_ENST00000276844	0.30137	0.164384	0.545455	NAPRT1_ENST00000276844	0.30137	0.164384	0.545455									NAPRT1_ENST00000276844	0.258824	2.14706
FOXP1	0.178788	0.709091	0.112121	0.252137	0.15812	0.627119	0.217712	2.4375	0.12628	330					FOXP1	0.178788	0.709091	0.112121					FOXP1	0.178788	0.709091	0.112121					FOXP1	0.252137	0.15812	0.627119	FOXP1	0.252137	0.15812	0.627119									FOXP1	0.217712	2.4375
C14orf43	0.251121	0.636771	0.112108	0.394366	0.176056	0.446429	0.335329	1.75309	0.126263	223					C14orf43	0.251121	0.636771	0.112108					C14orf43	0.251121	0.636771	0.112108					C14orf43	0.394366	0.176056	0.446429	C14orf43	0.394366	0.176056	0.446429									C14orf43	0.335329	1.75309
CFP	0.184	0.704	0.112	0.261364	0.159091	0.608696	0.22549	2.37838	0.126126	125					CFP	0.184	0.704	0.112					CFP	0.184	0.704	0.112					CFP	0.261364	0.159091	0.608696	CFP	0.261364	0.159091	0.608696									CFP	0.22549	2.37838
LRRFIP2	0.184	0.704	0.112	0.261364	0.159091	0.608696	0.22549	2.37838	0.126126	125					LRRFIP2	0.184	0.704	0.112					LRRFIP2	0.184	0.704	0.112					LRRFIP2	0.261364	0.159091	0.608696	LRRFIP2	0.261364	0.159091	0.608696									LRRFIP2	0.22549	2.37838
RARS	0.176	0.712	0.112	0.247191	0.157303	0.636364	0.213592	2.47222	0.126126	125					RARS	0.176	0.712	0.112					RARS	0.176	0.712	0.112					RARS	0.247191	0.157303	0.636364	RARS	0.247191	0.157303	0.636364									RARS	0.213592	2.47222
TNFRSF11B_ENST00000297350	0.24	0.648	0.112	0.37037	0.17284	0.466667	0.315789	1.84091	0.126126	125					TNFRSF11B_ENST00000297350	0.24	0.648	0.112					TNFRSF11B_ENST00000297350	0.24	0.648	0.112					TNFRSF11B_ENST00000297350	0.37037	0.17284	0.466667	TNFRSF11B_ENST00000297350	0.37037	0.17284	0.466667									TNFRSF11B_ENST00000297350	0.315789	1.84091
CAPN7	0.126866	0.761194	0.11194	0.166667	0.147059	0.882353	0.145299	3.1875	0.12605	134					CAPN7	0.126866	0.761194	0.11194					CAPN7	0.126866	0.761194	0.11194					CAPN7	0.166667	0.147059	0.882353	CAPN7	0.166667	0.147059	0.882353									CAPN7	0.145299	3.1875
KDM5C_ENST00000375401	0.124304	0.764378	0.111317	0.162621	0.145631	0.895522	0.141949	3.24409	0.125261	539					KDM5C_ENST00000375401	0.124304	0.764378	0.111317	KDM5C_ENST00000375401	0.124304	0.764378	0.111317									KDM5C_ENST00000375401	0.162621	0.145631	0.895522	KDM5C_ENST00000375401	0.162621	0.145631	0.895522									KDM5C_ENST00000375401	0.141949	3.24409
ITFG1	0.166667	0.722222	0.111111	0.230769	0.153846	0.666667	0.2	2.6	0.125	108					ITFG1	0.166667	0.722222	0.111111	ITFG1	0.166667	0.722222	0.111111									ITFG1	0.230769	0.153846	0.666667	ITFG1	0.230769	0.153846	0.666667									ITFG1	0.2	2.6
LARP1B_ENST00000427266	0.157407	0.731481	0.111111	0.21519	0.151899	0.705882	0.186813	2.72414	0.125	108					LARP1B_ENST00000427266	0.157407	0.731481	0.111111	LARP1B_ENST00000427266	0.157407	0.731481	0.111111									LARP1B_ENST00000427266	0.21519	0.151899	0.705882	LARP1B_ENST00000427266	0.21519	0.151899	0.705882									LARP1B_ENST00000427266	0.186813	2.72414
TBCCD1	0.166667	0.722222	0.111111	0.230769	0.153846	0.666667	0.2	2.6	0.125	108					TBCCD1	0.166667	0.722222	0.111111	TBCCD1	0.166667	0.722222	0.111111									TBCCD1	0.230769	0.153846	0.666667	TBCCD1	0.230769	0.153846	0.666667									TBCCD1	0.2	2.6
RBM27	0.197115	0.692308	0.110577	0.284722	0.159722	0.560976	0.245509	2.25	0.124324	208					RBM27	0.197115	0.692308	0.110577	RBM27	0.197115	0.692308	0.110577									RBM27	0.284722	0.159722	0.560976	RBM27	0.284722	0.159722	0.560976									RBM27	0.245509	2.25
MORC4_ENST00000355610	0.168421	0.721053	0.110526	0.233577	0.153285	0.65625	0.202532	2.58491	0.12426	190					MORC4_ENST00000355610	0.168421	0.721053	0.110526	MORC4_ENST00000355610	0.168421	0.721053	0.110526									MORC4_ENST00000355610	0.233577	0.153285	0.65625	MORC4_ENST00000355610	0.233577	0.153285	0.65625									MORC4_ENST00000355610	0.202532	2.58491
ST8SIA4	0.145349	0.744186	0.110465	0.195312	0.148438	0.76	0.170068	2.90909	0.124183	172					ST8SIA4	0.145349	0.744186	0.110465	ST8SIA4	0.145349	0.744186	0.110465									ST8SIA4	0.195312	0.148438	0.76	ST8SIA4	0.195312	0.148438	0.76									ST8SIA4	0.170068	2.90909
CPXCR1	0.233129	0.656442	0.110429	0.35514	0.168224	0.473684	0.304	1.91071	0.124138	163					CPXCR1	0.233129	0.656442	0.110429	CPXCR1	0.233129	0.656442	0.110429									CPXCR1	0.35514	0.168224	0.473684	CPXCR1	0.35514	0.168224	0.473684									CPXCR1	0.304	1.91071
COL6A5_ENST00000373157	0.149351	0.74026	0.11039	0.201754	0.149123	0.73913	0.175573	2.85	0.124088	154					COL6A5_ENST00000373157	0.149351	0.74026	0.11039	COL6A5_ENST00000373157	0.149351	0.74026	0.11039									COL6A5_ENST00000373157	0.201754	0.149123	0.73913	COL6A5_ENST00000373157	0.201754	0.149123	0.73913									COL6A5_ENST00000373157	0.175573	2.85
PHTF1	0.151724	0.737931	0.110345	0.205607	0.149533	0.727273	0.178862	2.81579	0.124031	145					PHTF1	0.151724	0.737931	0.110345	PHTF1	0.151724	0.737931	0.110345									PHTF1	0.205607	0.149533	0.727273	PHTF1	0.205607	0.149533	0.727273									PHTF1	0.178862	2.81579
AMBRA1	0.224199	0.66548	0.11032	0.336898	0.165775	0.492063	0.288991	1.98936	0.124	281					AMBRA1	0.224199	0.66548	0.11032	AMBRA1	0.224199	0.66548	0.11032									AMBRA1	0.336898	0.165775	0.492063	AMBRA1	0.336898	0.165775	0.492063									AMBRA1	0.288991	1.98936
MTMR1	0.220588	0.669118	0.110294	0.32967	0.164835	0.5	0.283019	2.02222	0.123967	136					MTMR1	0.220588	0.669118	0.110294	MTMR1	0.220588	0.669118	0.110294									MTMR1	0.32967	0.164835	0.5	MTMR1	0.32967	0.164835	0.5									MTMR1	0.283019	2.02222
ZNF480	0.220588	0.669118	0.110294	0.32967	0.164835	0.5	0.283019	2.02222	0.123967	136					ZNF480	0.220588	0.669118	0.110294	ZNF480	0.220588	0.669118	0.110294									ZNF480	0.32967	0.164835	0.5	ZNF480	0.32967	0.164835	0.5									ZNF480	0.283019	2.02222
CCDC175	0.165354	0.724409	0.110236	0.228261	0.152174	0.666667	0.198113	2.62857	0.123894	127					CCDC175	0.165354	0.724409	0.110236	CCDC175	0.165354	0.724409	0.110236									CCDC175	0.228261	0.152174	0.666667	CCDC175	0.228261	0.152174	0.666667									CCDC175	0.198113	2.62857
SPEN_ENST00000438066	0.161017	0.728814	0.110169	0.22093	0.151163	0.684211	0.191919	2.6875	0.12381	118					SPEN_ENST00000438066	0.161017	0.728814	0.110169	SPEN_ENST00000438066	0.161017	0.728814	0.110169									SPEN_ENST00000438066	0.22093	0.151163	0.684211	SPEN_ENST00000438066	0.22093	0.151163	0.684211									SPEN_ENST00000438066	0.191919	2.6875
EXOC6_ENST00000371547	0.165138	0.724771	0.110092	0.227848	0.151899	0.666667	0.197802	2.63333	0.123711	109					EXOC6_ENST00000371547	0.165138	0.724771	0.110092	EXOC6_ENST00000371547	0.165138	0.724771	0.110092									EXOC6_ENST00000371547	0.227848	0.151899	0.666667	EXOC6_ENST00000371547	0.227848	0.151899	0.666667									EXOC6_ENST00000371547	0.197802	2.63333
MBOAT1	0.293578	0.59633	0.110092	0.492308	0.184615	0.375	0.415584	1.47727	0.123711	109					MBOAT1	0.293578	0.59633	0.110092					MBOAT1	0.293578	0.59633	0.110092					MBOAT1	0.492308	0.184615	0.375					MBOAT1	0.492308	0.375	0.375					MBOAT1	0.415584	1.47727
EXOC5	0.229358	0.66055	0.110092	0.347222	0.166667	0.48	0.297619	1.94595	0.123711	109					EXOC5	0.229358	0.66055	0.110092	EXOC5	0.229358	0.66055	0.110092									EXOC5	0.347222	0.166667	0.48	EXOC5	0.347222	0.166667	0.48									EXOC5	0.297619	1.94595
LRRD1	0.08	0.81	0.11	0.0987654	0.135802	1.375	0.0869565	4.26316	0.123596	100					LRRD1	0.08	0.81	0.11					LRRD1	0.08	0.81	0.11					LRRD1	0.0987654	0.135802	1.375					LRRD1	0.0987654	1.375	1.375					LRRD1	0.0869565	4.26316
HEMGN	0.18	0.71	0.11	0.253521	0.15493	0.611111	0.219512	2.44828	0.123596	100					HEMGN	0.18	0.71	0.11	HEMGN	0.18	0.71	0.11									HEMGN	0.253521	0.15493	0.611111	HEMGN	0.253521	0.15493	0.611111									HEMGN	0.219512	2.44828
CCDC14_ENST00000433542	0.22561	0.664634	0.109756	0.33945	0.165138	0.486486	0.291339	1.98182	0.123288	164					CCDC14_ENST00000433542	0.22561	0.664634	0.109756	CCDC14_ENST00000433542	0.22561	0.664634	0.109756									CCDC14_ENST00000433542	0.33945	0.165138	0.486486	CCDC14_ENST00000433542	0.33945	0.165138	0.486486									CCDC14_ENST00000433542	0.291339	1.98182
KRIT1	0.164634	0.72561	0.109756	0.226891	0.151261	0.666667	0.19708	2.64444	0.123288	164					KRIT1	0.164634	0.72561	0.109756	KRIT1	0.164634	0.72561	0.109756									KRIT1	0.226891	0.151261	0.666667	KRIT1	0.226891	0.151261	0.666667									KRIT1	0.19708	2.64444
EPB41L5	0.184932	0.705479	0.109589	0.262136	0.15534	0.592593	0.226891	2.39535	0.123077	146					EPB41L5	0.184932	0.705479	0.109589	EPB41L5	0.184932	0.705479	0.109589									EPB41L5	0.262136	0.15534	0.592593	EPB41L5	0.262136	0.15534	0.592593									EPB41L5	0.226891	2.39535
VPS53_ENST00000437048	0.189781	0.70073	0.109489	0.270833	0.15625	0.576923	0.234234	2.34146	0.122951	137					VPS53_ENST00000437048	0.189781	0.70073	0.109489	VPS53_ENST00000437048	0.189781	0.70073	0.109489									VPS53_ENST00000437048	0.270833	0.15625	0.576923	VPS53_ENST00000437048	0.270833	0.15625	0.576923									VPS53_ENST00000437048	0.234234	2.34146
SEC23A_ENST00000536508	0.226562	0.664062	0.109375	0.341176	0.164706	0.482759	0.292929	1.97674	0.122807	128					SEC23A_ENST00000536508	0.226562	0.664062	0.109375	SEC23A_ENST00000536508	0.226562	0.664062	0.109375									SEC23A_ENST00000536508	0.341176	0.164706	0.482759	SEC23A_ENST00000536508	0.341176	0.164706	0.482759									SEC23A_ENST00000536508	0.292929	1.97674
SPATA21	0.25	0.640625	0.109375	0.390244	0.170732	0.4375	0.333333	1.78261	0.122807	128					SPATA21	0.25	0.640625	0.109375	SPATA21	0.25	0.640625	0.109375									SPATA21	0.390244	0.170732	0.4375	SPATA21	0.390244	0.170732	0.4375									SPATA21	0.333333	1.78261
FUBP3	0.218487	0.672269	0.109244	0.325	0.1625	0.5	0.27957	2.05128	0.122642	119					FUBP3	0.218487	0.672269	0.109244	FUBP3	0.218487	0.672269	0.109244									FUBP3	0.325	0.1625	0.5	FUBP3	0.325	0.1625	0.5									FUBP3	0.27957	2.05128
ZFP91-CNTF	0.168067	0.722689	0.109244	0.232558	0.151163	0.65	0.20202	2.60606	0.122642	119					ZFP91-CNTF	0.168067	0.722689	0.109244	ZFP91-CNTF	0.168067	0.722689	0.109244									ZFP91-CNTF	0.232558	0.151163	0.65	ZFP91-CNTF	0.232558	0.151163	0.65									ZFP91-CNTF	0.20202	2.60606
ZNF182_ENST00000376943	0.210084	0.680672	0.109244	0.308642	0.160494	0.52	0.265957	2.13158	0.122642	119					ZNF182_ENST00000376943	0.210084	0.680672	0.109244	ZNF182_ENST00000376943	0.210084	0.680672	0.109244									ZNF182_ENST00000376943	0.308642	0.160494	0.52	ZNF182_ENST00000376943	0.308642	0.160494	0.52									ZNF182_ENST00000376943	0.265957	2.13158
F9	0.181818	0.709091	0.109091	0.25641	0.153846	0.6	0.222222	2.4375	0.122449	165					F9	0.181818	0.709091	0.109091	F9	0.181818	0.709091	0.109091									F9	0.25641	0.153846	0.6	F9	0.25641	0.153846	0.6									F9	0.222222	2.4375
PTCH1_ENST00000331920	0.186916	0.70405	0.109034	0.265487	0.154867	0.583333	0.229885	2.37895	0.122378	642					PTCH1_ENST00000331920	0.186916	0.70405	0.109034	PTCH1_ENST00000331920	0.186916	0.70405	0.109034									PTCH1_ENST00000331920	0.265487	0.154867	0.583333	PTCH1_ENST00000331920	0.265487	0.154867	0.583333									PTCH1_ENST00000331920	0.229885	2.37895
ATAD2B_ENST00000238789	0.131579	0.759398	0.109023	0.173267	0.143564	0.828571	0.151515	3.15625	0.122363	266					ATAD2B_ENST00000238789	0.131579	0.759398	0.109023	ATAD2B_ENST00000238789	0.131579	0.759398	0.109023									ATAD2B_ENST00000238789	0.173267	0.143564	0.828571	ATAD2B_ENST00000238789	0.173267	0.143564	0.828571									ATAD2B_ENST00000238789	0.151515	3.15625
RBM6	0.199248	0.691729	0.109023	0.288043	0.157609	0.54717	0.248826	2.2439	0.122363	266					RBM6	0.199248	0.691729	0.109023	RBM6	0.199248	0.691729	0.109023									RBM6	0.288043	0.157609	0.54717	RBM6	0.288043	0.157609	0.54717									RBM6	0.248826	2.2439
WWC1	0.182456	0.708772	0.108772	0.257426	0.153465	0.596154	0.223176	2.43373	0.122047	285					WWC1	0.182456	0.708772	0.108772	WWC1	0.182456	0.708772	0.108772									WWC1	0.257426	0.153465	0.596154	WWC1	0.257426	0.153465	0.596154									WWC1	0.223176	2.43373
IFNGR1	0.166667	0.724638	0.108696	0.23	0.15	0.652174	0.2	2.63158	0.121951	138					IFNGR1	0.166667	0.724638	0.108696	IFNGR1	0.166667	0.724638	0.108696									IFNGR1	0.23	0.15	0.652174	IFNGR1	0.23	0.15	0.652174									IFNGR1	0.2	2.63158
MBD1_ENST00000269471	0.188406	0.702899	0.108696	0.268041	0.154639	0.576923	0.232143	2.36585	0.121951	138					MBD1_ENST00000269471	0.188406	0.702899	0.108696	MBD1_ENST00000269471	0.188406	0.702899	0.108696									MBD1_ENST00000269471	0.268041	0.154639	0.576923	MBD1_ENST00000269471	0.268041	0.154639	0.576923									MBD1_ENST00000269471	0.232143	2.36585
TTC6_ENST00000553443	0.182857	0.708571	0.108571	0.258065	0.153226	0.59375	0.223776	2.43137	0.121795	175					TTC6_ENST00000553443	0.182857	0.708571	0.108571	TTC6_ENST00000553443	0.182857	0.708571	0.108571									TTC6_ENST00000553443	0.258065	0.153226	0.59375	TTC6_ENST00000553443	0.258065	0.153226	0.59375									TTC6_ENST00000553443	0.223776	2.43137
AADAC	0.217054	0.674419	0.108527	0.321839	0.16092	0.5	0.277228	2.07143	0.121739	129					AADAC	0.217054	0.674419	0.108527	AADAC	0.217054	0.674419	0.108527									AADAC	0.321839	0.16092	0.5	AADAC	0.321839	0.16092	0.5									AADAC	0.277228	2.07143
TGFBR2_ENST00000359013	0.0629723	0.828715	0.108312	0.0759878	0.130699	1.72	0.0672043	4.83824	0.121469	397					TGFBR2_ENST00000359013	0.0629723	0.828715	0.108312					TGFBR2_ENST00000359013	0.0629723	0.828715	0.108312					TGFBR2_ENST00000359013	0.0759878	0.130699	1.72					TGFBR2_ENST00000359013	0.0759878	1.72	1.72					TGFBR2_ENST00000359013	0.0672043	4.83824
SP4	0.191083	0.700637	0.10828	0.272727	0.154545	0.566667	0.23622	2.34043	0.121429	157					SP4	0.191083	0.700637	0.10828	SP4	0.191083	0.700637	0.10828									SP4	0.272727	0.154545	0.566667	SP4	0.272727	0.154545	0.566667									SP4	0.23622	2.34043
JMY	0.175676	0.716216	0.108108	0.245283	0.150943	0.615385	0.213115	2.52381	0.121212	148					JMY	0.175676	0.716216	0.108108	JMY	0.175676	0.716216	0.108108									JMY	0.245283	0.150943	0.615385	JMY	0.245283	0.150943	0.615385									JMY	0.213115	2.52381
YIPF7	0.243243	0.648649	0.108108	0.375	0.166667	0.444444	0.321429	1.84615	0.121212	111					YIPF7	0.243243	0.648649	0.108108	YIPF7	0.243243	0.648649	0.108108									YIPF7	0.375	0.166667	0.444444	YIPF7	0.375	0.166667	0.444444									YIPF7	0.321429	1.84615
RTKN2	0.223022	0.669065	0.107914	0.333333	0.16129	0.483871	0.287037	2.02174	0.120968	139					RTKN2	0.223022	0.669065	0.107914	RTKN2	0.223022	0.669065	0.107914									RTKN2	0.333333	0.16129	0.483871	RTKN2	0.333333	0.16129	0.483871									RTKN2	0.287037	2.02174
KLHL8	0.176923	0.715385	0.107692	0.247312	0.150538	0.608696	0.214953	2.51351	0.12069	130					KLHL8	0.176923	0.715385	0.107692	KLHL8	0.176923	0.715385	0.107692									KLHL8	0.247312	0.150538	0.608696	KLHL8	0.247312	0.150538	0.608696									KLHL8	0.214953	2.51351
TP53BP1_ENST00000382044	0.170604	0.721785	0.107612	0.236364	0.149091	0.630769	0.205696	2.59434	0.120588	381					TP53BP1_ENST00000382044	0.170604	0.721785	0.107612	TP53BP1_ENST00000382044	0.170604	0.721785	0.107612									TP53BP1_ENST00000382044	0.236364	0.149091	0.630769	TP53BP1_ENST00000382044	0.236364	0.149091	0.630769									TP53BP1_ENST00000382044	0.205696	2.59434
C14orf38	0.173554	0.719008	0.107438	0.241379	0.149425	0.619048	0.21	2.55882	0.12037	121					C14orf38	0.173554	0.719008	0.107438	C14orf38	0.173554	0.719008	0.107438									C14orf38	0.241379	0.149425	0.619048	C14orf38	0.241379	0.149425	0.619048									C14orf38	0.21	2.55882
RGS6_ENST00000554782	0.239669	0.652893	0.107438	0.367089	0.164557	0.448276	0.315217	1.88095	0.12037	121					RGS6_ENST00000554782	0.239669	0.652893	0.107438	RGS6_ENST00000554782	0.239669	0.652893	0.107438									RGS6_ENST00000554782	0.367089	0.164557	0.448276	RGS6_ENST00000554782	0.367089	0.164557	0.448276									RGS6_ENST00000554782	0.315217	1.88095
MLLT4_ENST00000366806	0.183771	0.708831	0.107399	0.259259	0.151515	0.584416	0.225146	2.43443	0.120321	419					MLLT4_ENST00000366806	0.183771	0.708831	0.107399	MLLT4_ENST00000366806	0.183771	0.708831	0.107399									MLLT4_ENST00000366806	0.259259	0.151515	0.584416	MLLT4_ENST00000366806	0.259259	0.151515	0.584416									MLLT4_ENST00000366806	0.225146	2.43443
RBM28	0.261745	0.630872	0.107383	0.414894	0.170213	0.410256	0.354545	1.70909	0.120301	149					RBM28	0.261745	0.630872	0.107383	RBM28	0.261745	0.630872	0.107383									RBM28	0.414894	0.170213	0.410256	RBM28	0.414894	0.170213	0.410256									RBM28	0.354545	1.70909
TBC1D10C	0.261745	0.630872	0.107383	0.414894	0.170213	0.410256	0.354545	1.70909	0.120301	149					TBC1D10C	0.261745	0.630872	0.107383	TBC1D10C	0.261745	0.630872	0.107383									TBC1D10C	0.414894	0.170213	0.410256	TBC1D10C	0.414894	0.170213	0.410256									TBC1D10C	0.354545	1.70909
TTLL13_ENST00000438251	0.169643	0.723214	0.107143	0.234568	0.148148	0.631579	0.204301	2.6129	0.12	112					TTLL13_ENST00000438251	0.169643	0.723214	0.107143	TTLL13_ENST00000438251	0.169643	0.723214	0.107143									TTLL13_ENST00000438251	0.234568	0.148148	0.631579	TTLL13_ENST00000438251	0.234568	0.148148	0.631579									TTLL13_ENST00000438251	0.204301	2.6129
HLTF	0.178571	0.714286	0.107143	0.25	0.15	0.6	0.217391	2.5	0.12	196					HLTF	0.178571	0.714286	0.107143	HLTF	0.178571	0.714286	0.107143									HLTF	0.25	0.15	0.6	HLTF	0.25	0.15	0.6									HLTF	0.217391	2.5
ZNF441_ENST00000357901	0.185714	0.707143	0.107143	0.262626	0.151515	0.576923	0.22807	2.41463	0.12	140					ZNF441_ENST00000357901	0.185714	0.707143	0.107143	ZNF441_ENST00000357901	0.185714	0.707143	0.107143									ZNF441_ENST00000357901	0.262626	0.151515	0.576923	ZNF441_ENST00000357901	0.262626	0.151515	0.576923									ZNF441_ENST00000357901	0.22807	2.41463
LEO1	0.167939	0.725191	0.10687	0.231579	0.147368	0.636364	0.201835	2.63889	0.119658	131					LEO1	0.167939	0.725191	0.10687	LEO1	0.167939	0.725191	0.10687									LEO1	0.231579	0.147368	0.636364	LEO1	0.231579	0.147368	0.636364									LEO1	0.201835	2.63889
NUP93	0.149573	0.74359	0.106838	0.201149	0.143678	0.714286	0.175879	2.9	0.119617	234					NUP93	0.149573	0.74359	0.106838	NUP93	0.149573	0.74359	0.106838									NUP93	0.201149	0.143678	0.714286	NUP93	0.201149	0.143678	0.714286									NUP93	0.175879	2.9
YTHDC2	0.209402	0.683761	0.106838	0.30625	0.15625	0.510204	0.264865	2.16216	0.119617	234					YTHDC2	0.209402	0.683761	0.106838	YTHDC2	0.209402	0.683761	0.106838									YTHDC2	0.30625	0.15625	0.510204	YTHDC2	0.30625	0.15625	0.510204									YTHDC2	0.264865	2.16216
DIS3L	0.2	0.693333	0.106667	0.288462	0.153846	0.533333	0.25	2.26087	0.119403	150					DIS3L	0.2	0.693333	0.106667	DIS3L	0.2	0.693333	0.106667									DIS3L	0.288462	0.153846	0.533333	DIS3L	0.288462	0.153846	0.533333									DIS3L	0.25	2.26087
CUL4B_ENST00000336592	0.147208	0.746193	0.106599	0.197279	0.142857	0.724138	0.172619	2.94	0.119318	197					CUL4B_ENST00000336592	0.147208	0.746193	0.106599	CUL4B_ENST00000336592	0.147208	0.746193	0.106599									CUL4B_ENST00000336592	0.197279	0.142857	0.724138	CUL4B_ENST00000336592	0.197279	0.142857	0.724138									CUL4B_ENST00000336592	0.172619	2.94
SPATA21_ENST00000540400	0.229508	0.663934	0.106557	0.345679	0.160494	0.464286	0.297872	1.97561	0.119266	122					SPATA21_ENST00000540400	0.229508	0.663934	0.106557	SPATA21_ENST00000540400	0.229508	0.663934	0.106557									SPATA21_ENST00000540400	0.345679	0.160494	0.464286	SPATA21_ENST00000540400	0.345679	0.160494	0.464286									SPATA21_ENST00000540400	0.297872	1.97561
ZNF781	0.172131	0.721311	0.106557	0.238636	0.147727	0.619048	0.207921	2.58824	0.119266	122					ZNF781	0.172131	0.721311	0.106557	ZNF781	0.172131	0.721311	0.106557									ZNF781	0.238636	0.147727	0.619048	ZNF781	0.238636	0.147727	0.619048									ZNF781	0.207921	2.58824
EXOSC10_ENST00000544779	0.234043	0.659574	0.106383	0.354839	0.16129	0.454545	0.305556	1.9375	0.119048	141					EXOSC10_ENST00000544779	0.234043	0.659574	0.106383	EXOSC10_ENST00000544779	0.234043	0.659574	0.106383									EXOSC10_ENST00000544779	0.354839	0.16129	0.454545	EXOSC10_ENST00000544779	0.354839	0.16129	0.454545									EXOSC10_ENST00000544779	0.305556	1.9375
MEGF11_ENST00000360698	0.198582	0.695035	0.106383	0.285714	0.153061	0.535714	0.247788	2.27907	0.119048	141					MEGF11_ENST00000360698	0.198582	0.695035	0.106383	MEGF11_ENST00000360698	0.198582	0.695035	0.106383									MEGF11_ENST00000360698	0.285714	0.153061	0.535714	MEGF11_ENST00000360698	0.285714	0.153061	0.535714									MEGF11_ENST00000360698	0.247788	2.27907
PMS1	0.106383	0.787234	0.106383	0.135135	0.135135	1	0.119048	3.7	0.119048	282					PMS1	0.106383	0.787234	0.106383					PMS1	0.106383	0.787234	0.106383					PMS1	0.135135	0.135135	1	PMS1	0.135135	0.135135	1									PMS1	0.119048	3.7
RINT1	0.205674	0.687943	0.106383	0.298969	0.154639	0.517241	0.258929	2.20455	0.119048	141					RINT1	0.205674	0.687943	0.106383	RINT1	0.205674	0.687943	0.106383									RINT1	0.298969	0.154639	0.517241	RINT1	0.298969	0.154639	0.517241									RINT1	0.258929	2.20455
CAPRIN2_ENST00000417045	0.256637	0.637168	0.106195	0.402778	0.166667	0.413793	0.345238	1.7561	0.118812	113					CAPRIN2_ENST00000417045	0.256637	0.637168	0.106195	CAPRIN2_ENST00000417045	0.256637	0.637168	0.106195									CAPRIN2_ENST00000417045	0.402778	0.166667	0.413793	CAPRIN2_ENST00000417045	0.402778	0.166667	0.413793									CAPRIN2_ENST00000417045	0.345238	1.7561
ENPP3	0.168142	0.725664	0.106195	0.231707	0.146341	0.631579	0.202128	2.64516	0.118812	226					ENPP3	0.168142	0.725664	0.106195	ENPP3	0.168142	0.725664	0.106195									ENPP3	0.231707	0.146341	0.631579	ENPP3	0.231707	0.146341	0.631579									ENPP3	0.202128	2.64516
MBD4	0.185841	0.707965	0.106195	0.2625	0.15	0.571429	0.228261	2.42424	0.118812	113					MBD4	0.185841	0.707965	0.106195	MBD4	0.185841	0.707965	0.106195									MBD4	0.2625	0.15	0.571429	MBD4	0.2625	0.15	0.571429									MBD4	0.228261	2.42424
AGBL4	0.204545	0.689394	0.106061	0.296703	0.153846	0.518519	0.257143	2.21951	0.118644	132					AGBL4	0.204545	0.689394	0.106061	AGBL4	0.204545	0.689394	0.106061									AGBL4	0.296703	0.153846	0.518519	AGBL4	0.296703	0.153846	0.518519									AGBL4	0.257143	2.21951
DNMT3B_ENST00000201963	0.180516	0.713467	0.106017	0.253012	0.148594	0.587302	0.22028	2.49	0.11859	349					DNMT3B_ENST00000201963	0.180516	0.713467	0.106017	DNMT3B_ENST00000201963	0.180516	0.713467	0.106017									DNMT3B_ENST00000201963	0.253012	0.148594	0.587302	DNMT3B_ENST00000201963	0.253012	0.148594	0.587302									DNMT3B_ENST00000201963	0.22028	2.49
FGF13_ENST00000455663	0.221154	0.673077	0.105769	0.328571	0.157143	0.478261	0.283951	2.05882	0.11828	104					FGF13_ENST00000455663	0.221154	0.673077	0.105769	FGF13_ENST00000455663	0.221154	0.673077	0.105769									FGF13_ENST00000455663	0.328571	0.157143	0.478261	FGF13_ENST00000455663	0.328571	0.157143	0.478261									FGF13_ENST00000455663	0.283951	2.05882
TINAG	0.134615	0.759615	0.105769	0.177215	0.139241	0.785714	0.155556	3.16	0.11828	208					TINAG	0.134615	0.759615	0.105769	TINAG	0.134615	0.759615	0.105769									TINAG	0.177215	0.139241	0.785714	TINAG	0.177215	0.139241	0.785714									TINAG	0.155556	3.16
PTCH1_ENST00000430669	0.194864	0.699396	0.10574	0.278618	0.151188	0.542636	0.242026	2.32663	0.118243	662					PTCH1_ENST00000430669	0.194864	0.699396	0.10574	PTCH1_ENST00000430669	0.194864	0.699396	0.10574									PTCH1_ENST00000430669	0.278618	0.151188	0.542636	PTCH1_ENST00000430669	0.278618	0.151188	0.542636									PTCH1_ENST00000430669	0.242026	2.32663
CASK_ENST00000318588	0.186992	0.707317	0.105691	0.264368	0.149425	0.565217	0.23	2.41667	0.118182	123					CASK_ENST00000318588	0.186992	0.707317	0.105691	CASK_ENST00000318588	0.186992	0.707317	0.105691									CASK_ENST00000318588	0.264368	0.149425	0.565217	CASK_ENST00000318588	0.264368	0.149425	0.565217									CASK_ENST00000318588	0.23	2.41667
ZFP91	0.170732	0.723577	0.105691	0.235955	0.146067	0.619048	0.205882	2.61765	0.118182	123					ZFP91	0.170732	0.723577	0.105691	ZFP91	0.170732	0.723577	0.105691									ZFP91	0.235955	0.146067	0.619048	ZFP91	0.235955	0.146067	0.619048									ZFP91	0.205882	2.61765
AMBRA1_ENST00000458649	0.228873	0.665493	0.105634	0.343915	0.15873	0.461538	0.296804	1.98947	0.11811	284					AMBRA1_ENST00000458649	0.228873	0.665493	0.105634	AMBRA1_ENST00000458649	0.228873	0.665493	0.105634									AMBRA1_ENST00000458649	0.343915	0.15873	0.461538	AMBRA1_ENST00000458649	0.343915	0.15873	0.461538									AMBRA1_ENST00000458649	0.296804	1.98947
CASK	0.211111	0.683333	0.105556	0.308943	0.154472	0.5	0.267606	2.15789	0.118012	180					CASK	0.211111	0.683333	0.105556	CASK	0.211111	0.683333	0.105556									CASK	0.308943	0.154472	0.5	CASK	0.308943	0.154472	0.5									CASK	0.267606	2.15789
PTCH1_ENST00000375274	0.192982	0.701754	0.105263	0.275	0.15	0.545455	0.23913	2.35294	0.117647	627					PTCH1_ENST00000375274	0.192982	0.701754	0.105263	PTCH1_ENST00000375274	0.192982	0.701754	0.105263									PTCH1_ENST00000375274	0.275	0.15	0.545455	PTCH1_ENST00000375274	0.275	0.15	0.545455									PTCH1_ENST00000375274	0.23913	2.35294
CEP128	0.191729	0.703008	0.105263	0.272727	0.149733	0.54902	0.237209	2.36709	0.117647	266					CEP128	0.191729	0.703008	0.105263	CEP128	0.191729	0.703008	0.105263									CEP128	0.272727	0.149733	0.54902	CEP128	0.272727	0.149733	0.54902									CEP128	0.237209	2.36709
DYRK3_ENST00000367106	0.203008	0.691729	0.105263	0.293478	0.152174	0.518519	0.254717	2.2439	0.117647	133					DYRK3_ENST00000367106	0.203008	0.691729	0.105263	DYRK3_ENST00000367106	0.203008	0.691729	0.105263									DYRK3_ENST00000367106	0.293478	0.152174	0.518519	DYRK3_ENST00000367106	0.293478	0.152174	0.518519									DYRK3_ENST00000367106	0.254717	2.2439
HEATR5A_ENST00000404677	0.203947	0.690789	0.105263	0.295238	0.152381	0.516129	0.256198	2.23404	0.117647	152					HEATR5A_ENST00000404677	0.203947	0.690789	0.105263	HEATR5A_ENST00000404677	0.203947	0.690789	0.105263									HEATR5A_ENST00000404677	0.295238	0.152381	0.516129	HEATR5A_ENST00000404677	0.295238	0.152381	0.516129									HEATR5A_ENST00000404677	0.256198	2.23404
FCHSD2_ENST00000409418	0.236842	0.657895	0.105263	0.36	0.16	0.444444	0.310345	1.92308	0.117647	114					FCHSD2_ENST00000409418	0.236842	0.657895	0.105263	FCHSD2_ENST00000409418	0.236842	0.657895	0.105263									FCHSD2_ENST00000409418	0.36	0.16	0.444444	FCHSD2_ENST00000409418	0.36	0.16	0.444444									FCHSD2_ENST00000409418	0.310345	1.92308
TSC2	0.181818	0.712987	0.105195	0.255009	0.147541	0.578571	0.222222	2.48416	0.117562	770					TSC2	0.181818	0.712987	0.105195	TSC2	0.181818	0.712987	0.105195									TSC2	0.255009	0.147541	0.578571	TSC2	0.255009	0.147541	0.578571									TSC2	0.222222	2.48416
IFI16	0.18232	0.712707	0.104972	0.255814	0.147287	0.575758	0.222973	2.48077	0.117284	181					IFI16	0.18232	0.712707	0.104972	IFI16	0.18232	0.712707	0.104972									IFI16	0.255814	0.147287	0.575758	IFI16	0.255814	0.147287	0.575758									IFI16	0.222973	2.48077
MLLT4	0.176796	0.718232	0.104972	0.246154	0.146154	0.59375	0.214765	2.54902	0.117284	362					MLLT4	0.176796	0.718232	0.104972	MLLT4	0.176796	0.718232	0.104972									MLLT4	0.246154	0.146154	0.59375	MLLT4	0.246154	0.146154	0.59375									MLLT4	0.214765	2.54902
SEC23A	0.240741	0.654321	0.104938	0.367925	0.160377	0.435897	0.317073	1.89286	0.117241	162					SEC23A	0.240741	0.654321	0.104938	SEC23A	0.240741	0.654321	0.104938									SEC23A	0.367925	0.160377	0.435897	SEC23A	0.367925	0.160377	0.435897									SEC23A	0.317073	1.89286
SYNCRIP_ENST00000355238	0.265734	0.629371	0.104895	0.422222	0.166667	0.394737	0.361905	1.69811	0.117187	143					SYNCRIP_ENST00000355238	0.265734	0.629371	0.104895	SYNCRIP_ENST00000355238	0.265734	0.629371	0.104895									SYNCRIP_ENST00000355238	0.422222	0.166667	0.394737	SYNCRIP_ENST00000355238	0.422222	0.166667	0.394737									SYNCRIP_ENST00000355238	0.361905	1.69811
RSPH4A	0.233871	0.66129	0.104839	0.353659	0.158537	0.448276	0.305263	1.95238	0.117117	124					RSPH4A	0.233871	0.66129	0.104839	RSPH4A	0.233871	0.66129	0.104839									RSPH4A	0.353659	0.158537	0.448276	RSPH4A	0.353659	0.158537	0.448276									RSPH4A	0.305263	1.95238
MST4	0.142857	0.752381	0.104762	0.189873	0.139241	0.733333	0.166667	3.03846	0.117021	105					MST4	0.142857	0.752381	0.104762	MST4	0.142857	0.752381	0.104762									MST4	0.189873	0.139241	0.733333	MST4	0.189873	0.139241	0.733333									MST4	0.166667	3.03846
YTHDC1	0.21466	0.680628	0.104712	0.315385	0.153846	0.487805	0.273333	2.13115	0.116959	191					YTHDC1	0.21466	0.680628	0.104712	YTHDC1	0.21466	0.680628	0.104712									YTHDC1	0.315385	0.153846	0.487805	YTHDC1	0.315385	0.153846	0.487805									YTHDC1	0.273333	2.13115
SEMG1	0.174419	0.72093	0.104651	0.241935	0.145161	0.6	0.211268	2.58333	0.116883	172					SEMG1	0.174419	0.72093	0.104651	SEMG1	0.174419	0.72093	0.104651									SEMG1	0.241935	0.145161	0.6	SEMG1	0.241935	0.145161	0.6									SEMG1	0.211268	2.58333
CYP3A7	0.24183	0.653595	0.104575	0.37	0.16	0.432432	0.318966	1.88679	0.116788	153					CYP3A7	0.24183	0.653595	0.104575	CYP3A7	0.24183	0.653595	0.104575									CYP3A7	0.37	0.16	0.432432	CYP3A7	0.37	0.16	0.432432									CYP3A7	0.318966	1.88679
FAM49A	0.246269	0.649254	0.104478	0.37931	0.16092	0.424242	0.326733	1.85106	0.116667	134					FAM49A	0.246269	0.649254	0.104478	FAM49A	0.246269	0.649254	0.104478									FAM49A	0.37931	0.16092	0.424242	FAM49A	0.37931	0.16092	0.424242									FAM49A	0.326733	1.85106
ZNF318_ENST00000318149	0.174129	0.721393	0.104478	0.241379	0.144828	0.6	0.210843	2.58929	0.116667	201					ZNF318_ENST00000318149	0.174129	0.721393	0.104478	ZNF318_ENST00000318149	0.174129	0.721393	0.104478									ZNF318_ENST00000318149	0.241379	0.144828	0.6	ZNF318_ENST00000318149	0.241379	0.144828	0.6									ZNF318_ENST00000318149	0.210843	2.58929
CR1	0.181467	0.714286	0.104247	0.254054	0.145946	0.574468	0.221698	2.5	0.116379	518					CR1	0.181467	0.714286	0.104247	CR1	0.181467	0.714286	0.104247									CR1	0.254054	0.145946	0.574468	CR1	0.254054	0.145946	0.574468									CR1	0.221698	2.5
ZNF221	0.180556	0.715278	0.104167	0.252427	0.145631	0.576923	0.220339	2.5122	0.116279	144					ZNF221	0.180556	0.715278	0.104167	ZNF221	0.180556	0.715278	0.104167									ZNF221	0.252427	0.145631	0.576923	ZNF221	0.252427	0.145631	0.576923									ZNF221	0.220339	2.5122
ACSL4	0.248	0.648	0.104	0.382716	0.160494	0.419355	0.329787	1.84091	0.116071	125					ACSL4	0.248	0.648	0.104	ACSL4	0.248	0.648	0.104									ACSL4	0.382716	0.160494	0.419355	ACSL4	0.382716	0.160494	0.419355									ACSL4	0.329787	1.84091
DDO	0.304	0.592	0.104	0.513514	0.175676	0.342105	0.436782	1.45098	0.116071	125					DDO	0.304	0.592	0.104					DDO	0.304	0.592	0.104					DDO	0.513514	0.175676	0.342105	DDO	0.513514	0.175676	0.342105									DDO	0.436782	1.45098
ZNF182	0.2	0.696	0.104	0.287356	0.149425	0.52	0.25	2.28947	0.116071	125					ZNF182	0.2	0.696	0.104	ZNF182	0.2	0.696	0.104									ZNF182	0.287356	0.149425	0.52	ZNF182	0.287356	0.149425	0.52									ZNF182	0.25	2.28947
LARP4B	0.213115	0.68306	0.103825	0.312	0.152	0.487179	0.270833	2.15517	0.115854	183					LARP4B	0.213115	0.68306	0.103825	LARP4B	0.213115	0.68306	0.103825									LARP4B	0.312	0.152	0.487179	LARP4B	0.312	0.152	0.487179									LARP4B	0.270833	2.15517
ATF7IP_ENST00000543189	0.216981	0.679245	0.103774	0.319444	0.152778	0.478261	0.277108	2.11765	0.115789	212					ATF7IP_ENST00000543189	0.216981	0.679245	0.103774	ATF7IP_ENST00000543189	0.216981	0.679245	0.103774									ATF7IP_ENST00000543189	0.319444	0.152778	0.478261	ATF7IP_ENST00000543189	0.319444	0.152778	0.478261									ATF7IP_ENST00000543189	0.277108	2.11765
ELF4	0.243902	0.652439	0.103659	0.373832	0.158879	0.425	0.322581	1.87719	0.115646	164					ELF4	0.243902	0.652439	0.103659	ELF4	0.243902	0.652439	0.103659									ELF4	0.373832	0.158879	0.425	ELF4	0.373832	0.158879	0.425									ELF4	0.322581	1.87719
ELL	0.227586	0.668966	0.103448	0.340206	0.154639	0.454545	0.294643	2.02083	0.115385	145					ELL	0.227586	0.668966	0.103448	ELL	0.227586	0.668966	0.103448									ELL	0.340206	0.154639	0.454545	ELL	0.340206	0.154639	0.454545									ELL	0.294643	2.02083
TPTE2	0.189655	0.706897	0.103448	0.268293	0.146341	0.545455	0.234043	2.41176	0.115385	232					TPTE2	0.189655	0.706897	0.103448	TPTE2	0.189655	0.706897	0.103448									TPTE2	0.268293	0.146341	0.545455	TPTE2	0.268293	0.146341	0.545455									TPTE2	0.234043	2.41176
WDR33	0.144543	0.752212	0.103245	0.192157	0.137255	0.714286	0.168966	3.03571	0.115132	339					WDR33	0.144543	0.752212	0.103245	WDR33	0.144543	0.752212	0.103245									WDR33	0.192157	0.137255	0.714286	WDR33	0.192157	0.137255	0.714286									WDR33	0.168966	3.03571
CHEK2_ENST00000382580	0.0580645	0.83871	0.103226	0.0692308	0.123077	1.77778	0.0616438	5.2	0.115108	155					CHEK2_ENST00000382580	0.0580645	0.83871	0.103226					CHEK2_ENST00000382580	0.0580645	0.83871	0.103226					CHEK2_ENST00000382580	0.0692308	0.123077	1.77778					CHEK2_ENST00000382580	0.0692308	1.77778	1.77778					CHEK2_ENST00000382580	0.0616438	5.2
ICA1	0.225806	0.670968	0.103226	0.336538	0.153846	0.457143	0.291667	2.03922	0.115108	155					ICA1	0.225806	0.670968	0.103226	ICA1	0.225806	0.670968	0.103226									ICA1	0.336538	0.153846	0.457143	ICA1	0.336538	0.153846	0.457143									ICA1	0.291667	2.03922
WDR23	0.134921	0.761905	0.103175	0.177083	0.135417	0.764706	0.155963	3.2	0.115044	126					WDR23	0.134921	0.761905	0.103175	WDR23	0.134921	0.761905	0.103175									WDR23	0.177083	0.135417	0.764706	WDR23	0.177083	0.135417	0.764706									WDR23	0.155963	3.2
MAML1_ENST00000376951	0.222222	0.674603	0.103175	0.329412	0.152941	0.464286	0.285714	2.07317	0.115044	126					MAML1_ENST00000376951	0.222222	0.674603	0.103175	MAML1_ENST00000376951	0.222222	0.674603	0.103175									MAML1_ENST00000376951	0.329412	0.152941	0.464286	MAML1_ENST00000376951	0.329412	0.152941	0.464286									MAML1_ENST00000376951	0.285714	2.07317
HADHA	0.205882	0.691176	0.102941	0.297872	0.148936	0.5	0.259259	2.2381	0.114754	136					HADHA	0.205882	0.691176	0.102941	HADHA	0.205882	0.691176	0.102941									HADHA	0.297872	0.148936	0.5	HADHA	0.297872	0.148936	0.5									HADHA	0.259259	2.2381
ARHGAP12_ENST00000344936	0.178082	0.719178	0.10274	0.247619	0.142857	0.576923	0.216667	2.56098	0.114504	146					ARHGAP12_ENST00000344936	0.178082	0.719178	0.10274	ARHGAP12_ENST00000344936	0.178082	0.719178	0.10274									ARHGAP12_ENST00000344936	0.247619	0.142857	0.576923	ARHGAP12_ENST00000344936	0.247619	0.142857	0.576923									ARHGAP12_ENST00000344936	0.216667	2.56098
IRF6	0.227027	0.67027	0.102703	0.33871	0.153226	0.452381	0.293706	2.03279	0.114458	185					IRF6	0.227027	0.67027	0.102703	IRF6	0.227027	0.67027	0.102703									IRF6	0.33871	0.153226	0.452381	IRF6	0.33871	0.153226	0.452381									IRF6	0.293706	2.03279
RHOT1	0.247863	0.649573	0.102564	0.381579	0.157895	0.413793	0.329545	1.85366	0.114286	117					RHOT1	0.247863	0.649573	0.102564	RHOT1	0.247863	0.649573	0.102564									RHOT1	0.381579	0.157895	0.413793	RHOT1	0.381579	0.157895	0.413793									RHOT1	0.329545	1.85366
PIK3R3	0.0705128	0.826923	0.102564	0.0852713	0.124031	1.45455	0.0758621	4.77778	0.114286	156					PIK3R3	0.0705128	0.826923	0.102564					PIK3R3	0.0705128	0.826923	0.102564					PIK3R3	0.0852713	0.124031	1.45455					PIK3R3	0.0852713	1.45455	1.45455					PIK3R3	0.0758621	4.77778
BRAP	0.162393	0.735043	0.102564	0.22093	0.139535	0.631579	0.193878	2.77419	0.114286	117					BRAP	0.162393	0.735043	0.102564	BRAP	0.162393	0.735043	0.102564									BRAP	0.22093	0.139535	0.631579	BRAP	0.22093	0.139535	0.631579									BRAP	0.193878	2.77419
SUSD5	0.314103	0.583333	0.102564	0.538462	0.175824	0.326531	0.457944	1.4	0.114286	156					SUSD5	0.314103	0.583333	0.102564					SUSD5	0.314103	0.583333	0.102564					SUSD5	0.538462	0.175824	0.326531	SUSD5	0.538462	0.175824	0.326531									SUSD5	0.457944	1.4
VIPAR	0.316239	0.581197	0.102564	0.544118	0.176471	0.324324	0.4625	1.38776	0.114286	117					VIPAR	0.316239	0.581197	0.102564					VIPAR	0.316239	0.581197	0.102564					VIPAR	0.544118	0.176471	0.324324	VIPAR	0.544118	0.176471	0.324324									VIPAR	0.4625	1.38776
GOLGA4	0.15903	0.738544	0.102426	0.215328	0.138686	0.644068	0.189103	2.82474	0.114114	371					GOLGA4	0.15903	0.738544	0.102426	GOLGA4	0.15903	0.738544	0.102426									GOLGA4	0.215328	0.138686	0.644068	GOLGA4	0.215328	0.138686	0.644068									GOLGA4	0.189103	2.82474
CCDC102B_ENST00000358653	0.181102	0.716535	0.102362	0.252747	0.142857	0.565217	0.221154	2.52778	0.114035	127					CCDC102B_ENST00000358653	0.181102	0.716535	0.102362	CCDC102B_ENST00000358653	0.181102	0.716535	0.102362									CCDC102B_ENST00000358653	0.252747	0.142857	0.565217	CCDC102B_ENST00000358653	0.252747	0.142857	0.565217									CCDC102B_ENST00000358653	0.221154	2.52778
CFHR5	0.201278	0.696486	0.102236	0.288991	0.146789	0.507937	0.252	2.29474	0.113879	313					CFHR5	0.201278	0.696486	0.102236	CFHR5	0.201278	0.696486	0.102236									CFHR5	0.288991	0.146789	0.507937	CFHR5	0.288991	0.146789	0.507937									CFHR5	0.252	2.29474
NBEAL1	0.152941	0.745098	0.101961	0.205263	0.136842	0.666667	0.180556	2.92308	0.113537	255					NBEAL1	0.152941	0.745098	0.101961	NBEAL1	0.152941	0.745098	0.101961									NBEAL1	0.205263	0.136842	0.666667	NBEAL1	0.205263	0.136842	0.666667									NBEAL1	0.180556	2.92308
ZFX	0.248408	0.649682	0.101911	0.382353	0.156863	0.410256	0.330508	1.85455	0.113475	157					ZFX	0.248408	0.649682	0.101911	ZFX	0.248408	0.649682	0.101911									ZFX	0.382353	0.156863	0.410256	ZFX	0.382353	0.156863	0.410256									ZFX	0.330508	1.85455
PPP4R1_ENST00000400556	0.24537	0.652778	0.101852	0.375887	0.156028	0.415094	0.325153	1.88	0.113402	216					PPP4R1_ENST00000400556	0.24537	0.652778	0.101852	PPP4R1_ENST00000400556	0.24537	0.652778	0.101852									PPP4R1_ENST00000400556	0.375887	0.156028	0.415094	PPP4R1_ENST00000400556	0.375887	0.156028	0.415094									PPP4R1_ENST00000400556	0.325153	1.88
C10orf2	0.221557	0.676647	0.101796	0.327434	0.150442	0.459459	0.284615	2.09259	0.113333	167					C10orf2	0.221557	0.676647	0.101796	C10orf2	0.221557	0.676647	0.101796									C10orf2	0.327434	0.150442	0.459459	C10orf2	0.327434	0.150442	0.459459									C10orf2	0.284615	2.09259
SLC27A3	0.127119	0.771186	0.101695	0.164835	0.131868	0.8	0.145631	3.37037	0.113208	118					SLC27A3	0.127119	0.771186	0.101695	SLC27A3	0.127119	0.771186	0.101695									SLC27A3	0.164835	0.131868	0.8	SLC27A3	0.164835	0.131868	0.8									SLC27A3	0.145631	3.37037
SRSF11_ENST00000370950	0.161017	0.737288	0.101695	0.218391	0.137931	0.631579	0.191919	2.80645	0.113208	118					SRSF11_ENST00000370950	0.161017	0.737288	0.101695	SRSF11_ENST00000370950	0.161017	0.737288	0.101695									SRSF11_ENST00000370950	0.218391	0.137931	0.631579	SRSF11_ENST00000370950	0.218391	0.137931	0.631579									SRSF11_ENST00000370950	0.191919	2.80645
KIAA1324	0.224599	0.673797	0.101604	0.333333	0.150794	0.452381	0.289655	2.06557	0.113095	187					KIAA1324	0.224599	0.673797	0.101604	KIAA1324	0.224599	0.673797	0.101604									KIAA1324	0.333333	0.150794	0.452381	KIAA1324	0.333333	0.150794	0.452381									KIAA1324	0.289655	2.06557
CYBB	0.226562	0.671875	0.101562	0.337209	0.151163	0.448276	0.292929	2.04762	0.113043	128					CYBB	0.226562	0.671875	0.101562	CYBB	0.226562	0.671875	0.101562									CYBB	0.337209	0.151163	0.448276	CYBB	0.337209	0.151163	0.448276									CYBB	0.292929	2.04762
KCNQ5_ENST00000370392	0.23913	0.65942	0.101449	0.362637	0.153846	0.424242	0.314286	1.93617	0.112903	138					KCNQ5_ENST00000370392	0.23913	0.65942	0.101449	KCNQ5_ENST00000370392	0.23913	0.65942	0.101449									KCNQ5_ENST00000370392	0.362637	0.153846	0.424242	KCNQ5_ENST00000370392	0.362637	0.153846	0.424242									KCNQ5_ENST00000370392	0.314286	1.93617
LHX3	0.217391	0.681159	0.101449	0.319149	0.148936	0.466667	0.277778	2.13636	0.112903	138					LHX3	0.217391	0.681159	0.101449	LHX3	0.217391	0.681159	0.101449									LHX3	0.319149	0.148936	0.466667	LHX3	0.319149	0.148936	0.466667									LHX3	0.277778	2.13636
CASC1_ENST00000354189	0.243243	0.655405	0.101351	0.371134	0.154639	0.416667	0.321429	1.90196	0.112782	148					CASC1_ENST00000354189	0.243243	0.655405	0.101351	CASC1_ENST00000354189	0.243243	0.655405	0.101351									CASC1_ENST00000354189	0.371134	0.154639	0.416667	CASC1_ENST00000354189	0.371134	0.154639	0.416667									CASC1_ENST00000354189	0.321429	1.90196
DIS3L_ENST00000319212	0.189873	0.708861	0.101266	0.267857	0.142857	0.533333	0.234375	2.43478	0.112676	158					DIS3L_ENST00000319212	0.189873	0.708861	0.101266	DIS3L_ENST00000319212	0.189873	0.708861	0.101266									DIS3L_ENST00000319212	0.267857	0.142857	0.533333	DIS3L_ENST00000319212	0.267857	0.142857	0.533333									DIS3L_ENST00000319212	0.234375	2.43478
ELL2	0.139241	0.759494	0.101266	0.183333	0.133333	0.727273	0.161765	3.15789	0.112676	158					ELL2	0.139241	0.759494	0.101266	ELL2	0.139241	0.759494	0.101266									ELL2	0.183333	0.133333	0.727273	ELL2	0.183333	0.133333	0.727273									ELL2	0.161765	3.15789
MARK2_ENST00000402010	0.228723	0.670213	0.101064	0.34127	0.150794	0.44186	0.296552	2.03226	0.112426	188					MARK2_ENST00000402010	0.228723	0.670213	0.101064	MARK2_ENST00000402010	0.228723	0.670213	0.101064									MARK2_ENST00000402010	0.34127	0.150794	0.44186	MARK2_ENST00000402010	0.34127	0.150794	0.44186									MARK2_ENST00000402010	0.296552	2.03226
PPIG	0.151515	0.747475	0.10101	0.202703	0.135135	0.666667	0.178571	2.96	0.11236	198					PPIG	0.151515	0.747475	0.10101	PPIG	0.151515	0.747475	0.10101									PPIG	0.202703	0.135135	0.666667	PPIG	0.202703	0.135135	0.666667									PPIG	0.178571	2.96
ACPL2	0.266055	0.633028	0.100917	0.42029	0.15942	0.37931	0.3625	1.725	0.112245	109					ACPL2	0.266055	0.633028	0.100917	ACPL2	0.266055	0.633028	0.100917									ACPL2	0.42029	0.15942	0.37931	ACPL2	0.42029	0.15942	0.37931									ACPL2	0.3625	1.725
DUSP22	0.247706	0.651376	0.100917	0.380282	0.15493	0.407407	0.329268	1.86842	0.112245	109					DUSP22	0.247706	0.651376	0.100917	DUSP22	0.247706	0.651376	0.100917									DUSP22	0.380282	0.15493	0.407407	DUSP22	0.380282	0.15493	0.407407									DUSP22	0.329268	1.86842
SELL	0.266055	0.633028	0.100917	0.42029	0.15942	0.37931	0.3625	1.725	0.112245	109					SELL	0.266055	0.633028	0.100917	SELL	0.266055	0.633028	0.100917									SELL	0.42029	0.15942	0.37931	SELL	0.42029	0.15942	0.37931									SELL	0.3625	1.725
PABPC4L	0.193798	0.705426	0.100775	0.274725	0.142857	0.52	0.240385	2.39474	0.112069	129					PABPC4L	0.193798	0.705426	0.100775	PABPC4L	0.193798	0.705426	0.100775									PABPC4L	0.274725	0.142857	0.52	PABPC4L	0.274725	0.142857	0.52									PABPC4L	0.240385	2.39474
PABPC4L_ENST00000529122	0.193798	0.705426	0.100775	0.274725	0.142857	0.52	0.240385	2.39474	0.112069	129					PABPC4L_ENST00000529122	0.193798	0.705426	0.100775	PABPC4L_ENST00000529122	0.193798	0.705426	0.100775									PABPC4L_ENST00000529122	0.274725	0.142857	0.52	PABPC4L_ENST00000529122	0.274725	0.142857	0.52									PABPC4L_ENST00000529122	0.240385	2.39474
DGKE	0.194245	0.705036	0.100719	0.27551	0.142857	0.518519	0.241071	2.39024	0.112	139					DGKE	0.194245	0.705036	0.100719	DGKE	0.194245	0.705036	0.100719									DGKE	0.27551	0.142857	0.518519	DGKE	0.27551	0.142857	0.518519									DGKE	0.241071	2.39024
HELLS_ENST00000371332	0.201439	0.697842	0.100719	0.28866	0.14433	0.5	0.252252	2.30952	0.112	139					HELLS_ENST00000371332	0.201439	0.697842	0.100719	HELLS_ENST00000371332	0.201439	0.697842	0.100719									HELLS_ENST00000371332	0.28866	0.14433	0.5	HELLS_ENST00000371332	0.28866	0.14433	0.5									HELLS_ENST00000371332	0.252252	2.30952
CD1E	0.219424	0.679856	0.100719	0.322751	0.148148	0.459016	0.281106	2.1236	0.112	278					CD1E	0.219424	0.679856	0.100719	CD1E	0.219424	0.679856	0.100719									CD1E	0.322751	0.148148	0.459016	CD1E	0.322751	0.148148	0.459016									CD1E	0.281106	2.1236
COBL_ENST00000395542	0.272311	0.627002	0.100686	0.434307	0.160584	0.369748	0.374214	1.68098	0.111959	437					COBL_ENST00000395542	0.272311	0.627002	0.100686	COBL_ENST00000395542	0.272311	0.627002	0.100686									COBL_ENST00000395542	0.434307	0.160584	0.369748	COBL_ENST00000395542	0.434307	0.160584	0.369748									COBL_ENST00000395542	0.374214	1.68098
TRIM60	0.201258	0.698113	0.100629	0.288288	0.144144	0.5	0.251969	2.3125	0.111888	159					TRIM60	0.201258	0.698113	0.100629	TRIM60	0.201258	0.698113	0.100629									TRIM60	0.288288	0.144144	0.5	TRIM60	0.288288	0.144144	0.5									TRIM60	0.251969	2.3125
AURKA	0.100629	0.798742	0.100629	0.125984	0.125984	1	0.111888	3.96875	0.111888	159					AURKA	0.100629	0.798742	0.100629					AURKA	0.100629	0.798742	0.100629					AURKA	0.125984	0.125984	1	AURKA	0.125984	0.125984	1									AURKA	0.111888	3.96875
SH2B1_ENST00000359285	0.226415	0.672956	0.100629	0.336449	0.149533	0.444444	0.292683	2.05769	0.111888	159					SH2B1_ENST00000359285	0.226415	0.672956	0.100629	SH2B1_ENST00000359285	0.226415	0.672956	0.100629									SH2B1_ENST00000359285	0.336449	0.149533	0.444444	SH2B1_ENST00000359285	0.336449	0.149533	0.444444									SH2B1_ENST00000359285	0.292683	2.05769
EPB41L3_ENST00000542146	0.218935	0.680473	0.100592	0.321739	0.147826	0.459459	0.280303	2.12963	0.111842	169					EPB41L3_ENST00000542146	0.218935	0.680473	0.100592	EPB41L3_ENST00000542146	0.218935	0.680473	0.100592									EPB41L3_ENST00000542146	0.321739	0.147826	0.459459	EPB41L3_ENST00000542146	0.321739	0.147826	0.459459									EPB41L3_ENST00000542146	0.280303	2.12963
SMC6_ENST00000381272	0.150838	0.748603	0.100559	0.201493	0.134328	0.666667	0.177632	2.97778	0.111801	179					SMC6_ENST00000381272	0.150838	0.748603	0.100559	SMC6_ENST00000381272	0.150838	0.748603	0.100559									SMC6_ENST00000381272	0.201493	0.134328	0.666667	SMC6_ENST00000381272	0.201493	0.134328	0.666667									SMC6_ENST00000381272	0.177632	2.97778
SUZ12	0.0753769	0.824121	0.100503	0.0914634	0.121951	1.33333	0.0815217	4.68571	0.111732	199					SUZ12	0.0753769	0.824121	0.100503					SUZ12	0.0753769	0.824121	0.100503					SUZ12	0.0914634	0.121951	1.33333					SUZ12	0.0914634	1.33333	1.33333					SUZ12	0.0815217	4.68571
KIDINS220_ENST00000319688	0.256281	0.643216	0.100503	0.398438	0.15625	0.392157	0.344595	1.80282	0.111732	199					KIDINS220_ENST00000319688	0.256281	0.643216	0.100503	KIDINS220_ENST00000319688	0.256281	0.643216	0.100503									KIDINS220_ENST00000319688	0.398438	0.15625	0.392157	KIDINS220_ENST00000319688	0.398438	0.15625	0.392157									KIDINS220_ENST00000319688	0.344595	1.80282
C12orf50	0.20603	0.693467	0.100503	0.297101	0.144928	0.487805	0.259494	2.2623	0.111732	199					C12orf50	0.20603	0.693467	0.100503	C12orf50	0.20603	0.693467	0.100503									C12orf50	0.297101	0.144928	0.487805	C12orf50	0.297101	0.144928	0.487805									C12orf50	0.259494	2.2623
REST	0.141553	0.757991	0.100457	0.186747	0.13253	0.709677	0.164894	3.13208	0.111675	219					REST	0.141553	0.757991	0.100457	REST	0.141553	0.757991	0.100457									REST	0.186747	0.13253	0.709677	REST	0.186747	0.13253	0.709677									REST	0.164894	3.13208
COBL	0.267857	0.631696	0.100446	0.424028	0.159011	0.375	0.365854	1.71515	0.111663	448					COBL	0.267857	0.631696	0.100446	COBL	0.267857	0.631696	0.100446									COBL	0.424028	0.159011	0.375	COBL	0.424028	0.159011	0.375									COBL	0.365854	1.71515
BRCA2	0.106667	0.792889	0.100444	0.134529	0.126682	0.941667	0.119403	3.82833	0.11166	1125					BRCA2	0.106667	0.792889	0.100444					BRCA2	0.106667	0.792889	0.100444					BRCA2	0.134529	0.126682	0.941667	BRCA2	0.134529	0.126682	0.941667									BRCA2	0.119403	3.82833
KIAA0232	0.209205	0.690377	0.100418	0.30303	0.145455	0.48	0.26455	2.22973	0.111628	239					KIAA0232	0.209205	0.690377	0.100418	KIAA0232	0.209205	0.690377	0.100418									KIAA0232	0.30303	0.145455	0.48	KIAA0232	0.30303	0.145455	0.48									KIAA0232	0.26455	2.22973
ATAD2	0.142857	0.756839	0.100304	0.188755	0.13253	0.702128	0.166667	3.1125	0.111486	329					ATAD2	0.142857	0.756839	0.100304	ATAD2	0.142857	0.756839	0.100304									ATAD2	0.188755	0.13253	0.702128	ATAD2	0.188755	0.13253	0.702128									ATAD2	0.166667	3.1125
AAAS	0.22	0.68	0.1	0.323529	0.147059	0.454545	0.282051	2.125	0.111111	100					AAAS	0.22	0.68	0.1	AAAS	0.22	0.68	0.1									AAAS	0.323529	0.147059	0.454545	AAAS	0.323529	0.147059	0.454545									AAAS	0.282051	2.125
ABL2_ENST00000392043	0.276923	0.623077	0.1	0.444444	0.160494	0.361111	0.382979	1.65306	0.111111	130					ABL2_ENST00000392043	0.276923	0.623077	0.1	ABL2_ENST00000392043	0.276923	0.623077	0.1									ABL2_ENST00000392043	0.444444	0.160494	0.361111	ABL2_ENST00000392043	0.444444	0.160494	0.361111									ABL2_ENST00000392043	0.382979	1.65306
ARMC8_ENST00000481646	0.181818	0.718182	0.1	0.253165	0.139241	0.55	0.222222	2.54839	0.111111	110					ARMC8_ENST00000481646	0.181818	0.718182	0.1	ARMC8_ENST00000481646	0.181818	0.718182	0.1									ARMC8_ENST00000481646	0.253165	0.139241	0.55	ARMC8_ENST00000481646	0.253165	0.139241	0.55									ARMC8_ENST00000481646	0.222222	2.54839
ATP11B	0.152	0.748	0.1	0.203209	0.13369	0.657895	0.179245	2.96825	0.111111	250					ATP11B	0.152	0.748	0.1	ATP11B	0.152	0.748	0.1									ATP11B	0.203209	0.13369	0.657895	ATP11B	0.203209	0.13369	0.657895									ATP11B	0.179245	2.96825
CCDC67	0.264706	0.635294	0.1	0.416667	0.157407	0.377778	0.36	1.74194	0.111111	170					CCDC67	0.264706	0.635294	0.1	CCDC67	0.264706	0.635294	0.1									CCDC67	0.416667	0.157407	0.377778	CCDC67	0.416667	0.157407	0.377778									CCDC67	0.36	1.74194
CLINT1_ENST00000523094	0.23	0.67	0.1	0.343284	0.149254	0.434783	0.298701	2.0303	0.111111	100					CLINT1_ENST00000523094	0.23	0.67	0.1	CLINT1_ENST00000523094	0.23	0.67	0.1									CLINT1_ENST00000523094	0.343284	0.149254	0.434783	CLINT1_ENST00000523094	0.343284	0.149254	0.434783									CLINT1_ENST00000523094	0.298701	2.0303
DDX4	0.117647	0.782353	0.1	0.150376	0.12782	0.85	0.133333	3.59459	0.111111	170					DDX4	0.117647	0.782353	0.1					DDX4	0.117647	0.782353	0.1					DDX4	0.150376	0.12782	0.85	DDX4	0.150376	0.12782	0.85									DDX4	0.133333	3.59459
DQX1	0.2	0.7	0.1	0.285714	0.142857	0.5	0.25	2.33333	0.111111	140					DQX1	0.2	0.7	0.1	DQX1	0.2	0.7	0.1									DQX1	0.285714	0.142857	0.5	DQX1	0.285714	0.142857	0.5									DQX1	0.25	2.33333
EXOC6_ENST00000371552	0.178571	0.721429	0.1	0.247525	0.138614	0.56	0.217391	2.58974	0.111111	140					EXOC6_ENST00000371552	0.178571	0.721429	0.1	EXOC6_ENST00000371552	0.178571	0.721429	0.1									EXOC6_ENST00000371552	0.247525	0.138614	0.56	EXOC6_ENST00000371552	0.247525	0.138614	0.56									EXOC6_ENST00000371552	0.217391	2.58974
FCHSD2	0.245455	0.654545	0.1	0.375	0.152778	0.407407	0.325301	1.89474	0.111111	110					FCHSD2	0.245455	0.654545	0.1	FCHSD2	0.245455	0.654545	0.1									FCHSD2	0.375	0.152778	0.407407	FCHSD2	0.375	0.152778	0.407407									FCHSD2	0.325301	1.89474
HPSE	0.209091	0.690909	0.1	0.302632	0.144737	0.478261	0.264368	2.23529	0.111111	110					HPSE	0.209091	0.690909	0.1	HPSE	0.209091	0.690909	0.1									HPSE	0.302632	0.144737	0.478261	HPSE	0.302632	0.144737	0.478261									HPSE	0.264368	2.23529
IL5RA	0.176923	0.723077	0.1	0.244681	0.138298	0.565217	0.214953	2.61111	0.111111	130					IL5RA	0.176923	0.723077	0.1	IL5RA	0.176923	0.723077	0.1									IL5RA	0.244681	0.138298	0.565217	IL5RA	0.244681	0.138298	0.565217									IL5RA	0.214953	2.61111
KATNAL2	0.245455	0.654545	0.1	0.375	0.152778	0.407407	0.325301	1.89474	0.111111	110					KATNAL2	0.245455	0.654545	0.1	KATNAL2	0.245455	0.654545	0.1									KATNAL2	0.375	0.152778	0.407407	KATNAL2	0.375	0.152778	0.407407									KATNAL2	0.325301	1.89474
NEK9	0.228571	0.671429	0.1	0.340426	0.148936	0.4375	0.296296	2.04348	0.111111	140					NEK9	0.228571	0.671429	0.1	NEK9	0.228571	0.671429	0.1									NEK9	0.340426	0.148936	0.4375	NEK9	0.340426	0.148936	0.4375									NEK9	0.296296	2.04348
OLFM3_ENST00000338858	0.209524	0.690476	0.1	0.303448	0.144828	0.477273	0.26506	2.23077	0.111111	210					OLFM3_ENST00000338858	0.209524	0.690476	0.1	OLFM3_ENST00000338858	0.209524	0.690476	0.1									OLFM3_ENST00000338858	0.303448	0.144828	0.477273	OLFM3_ENST00000338858	0.303448	0.144828	0.477273									OLFM3_ENST00000338858	0.26506	2.23077
RBL1	0.168	0.732	0.1	0.229508	0.136612	0.595238	0.201923	2.73134	0.111111	250					RBL1	0.168	0.732	0.1	RBL1	0.168	0.732	0.1									RBL1	0.229508	0.136612	0.595238	RBL1	0.229508	0.136612	0.595238									RBL1	0.201923	2.73134
RPS6KA3	0.127778	0.772222	0.1	0.165468	0.129496	0.782609	0.146497	3.39024	0.111111	180					RPS6KA3	0.127778	0.772222	0.1	RPS6KA3	0.127778	0.772222	0.1									RPS6KA3	0.165468	0.129496	0.782609	RPS6KA3	0.165468	0.129496	0.782609									RPS6KA3	0.146497	3.39024
ZKSCAN3	0.292308	0.607692	0.1	0.481013	0.164557	0.342105	0.413043	1.54902	0.111111	130					ZKSCAN3	0.292308	0.607692	0.1	ZKSCAN3	0.292308	0.607692	0.1									ZKSCAN3	0.481013	0.164557	0.342105	ZKSCAN3	0.481013	0.164557	0.342105									ZKSCAN3	0.413043	1.54902
ZNF189	0.2	0.7	0.1	0.285714	0.142857	0.5	0.25	2.33333	0.111111	120					ZNF189	0.2	0.7	0.1	ZNF189	0.2	0.7	0.1									ZNF189	0.285714	0.142857	0.5	ZNF189	0.285714	0.142857	0.5									ZNF189	0.25	2.33333
DDX21	0.191667	0.708333	0.1	0.270588	0.141176	0.521739	0.237113	2.42857	0.111111	120					DDX21	0.191667	0.708333	0.1	DDX21	0.191667	0.708333	0.1									DDX21	0.270588	0.141176	0.521739	DDX21	0.270588	0.141176	0.521739									DDX21	0.237113	2.42857
GBA3	0.192857	0.707143	0.1	0.272727	0.141414	0.518519	0.238938	2.41463	0.111111	140					GBA3	0.192857	0.707143	0.1	GBA3	0.192857	0.707143	0.1									GBA3	0.272727	0.141414	0.518519	GBA3	0.272727	0.141414	0.518519									GBA3	0.238938	2.41463
PRPF40A	0.164286	0.735714	0.1	0.223301	0.135922	0.608696	0.196581	2.78378	0.111111	140					PRPF40A	0.164286	0.735714	0.1	PRPF40A	0.164286	0.735714	0.1									PRPF40A	0.223301	0.135922	0.608696	PRPF40A	0.223301	0.135922	0.608696									PRPF40A	0.196581	2.78378
NIPBL	0.182741	0.717428	0.0998308	0.254717	0.139151	0.546296	0.223602	2.53892	0.110902	591					NIPBL	0.182741	0.717428	0.0998308	NIPBL	0.182741	0.717428	0.0998308									NIPBL	0.254717	0.139151	0.546296	NIPBL	0.254717	0.139151	0.546296									NIPBL	0.223602	2.53892
DNMT3B	0.191375	0.708895	0.0997305	0.269962	0.140684	0.521127	0.236667	2.43519	0.110778	371					DNMT3B	0.191375	0.708895	0.0997305	DNMT3B	0.191375	0.708895	0.0997305									DNMT3B	0.269962	0.140684	0.521127	DNMT3B	0.269962	0.140684	0.521127									DNMT3B	0.236667	2.43519
AHI1	0.13089	0.769634	0.0994764	0.170068	0.129252	0.76	0.150602	3.34091	0.110465	191					AHI1	0.13089	0.769634	0.0994764	AHI1	0.13089	0.769634	0.0994764									AHI1	0.170068	0.129252	0.76	AHI1	0.170068	0.129252	0.76									AHI1	0.150602	3.34091
ZNF800	0.209945	0.690608	0.0994475	0.304	0.144	0.473684	0.265734	2.23214	0.110429	181					ZNF800	0.209945	0.690608	0.0994475	ZNF800	0.209945	0.690608	0.0994475									ZNF800	0.304	0.144	0.473684	ZNF800	0.304	0.144	0.473684									ZNF800	0.265734	2.23214
MTM1	0.15528	0.745342	0.0993789	0.208333	0.133333	0.64	0.183824	2.92683	0.110345	161					MTM1	0.15528	0.745342	0.0993789	MTM1	0.15528	0.745342	0.0993789									MTM1	0.208333	0.133333	0.64	MTM1	0.208333	0.133333	0.64									MTM1	0.183824	2.92683
ZMYM3	0.208075	0.692547	0.0993789	0.300448	0.143498	0.477612	0.262745	2.25253	0.110345	322					ZMYM3	0.208075	0.692547	0.0993789	ZMYM3	0.208075	0.692547	0.0993789									ZMYM3	0.300448	0.143498	0.477612	ZMYM3	0.300448	0.143498	0.477612									ZMYM3	0.262745	2.25253
EPHA3_ENST00000452448	0.112051	0.788584	0.0993658	0.142091	0.126005	0.886792	0.12619	3.73	0.110329	473					EPHA3_ENST00000452448	0.112051	0.788584	0.0993658					EPHA3_ENST00000452448	0.112051	0.788584	0.0993658					EPHA3_ENST00000452448	0.142091	0.126005	0.886792	EPHA3_ENST00000452448	0.142091	0.126005	0.886792									EPHA3_ENST00000452448	0.12619	3.73
RABEP1_ENST00000262477	0.22695	0.673759	0.0992908	0.336842	0.147368	0.4375	0.293578	2.06522	0.110236	141					RABEP1_ENST00000262477	0.22695	0.673759	0.0992908	RABEP1_ENST00000262477	0.22695	0.673759	0.0992908									RABEP1_ENST00000262477	0.336842	0.147368	0.4375	RABEP1_ENST00000262477	0.336842	0.147368	0.4375									RABEP1_ENST00000262477	0.293578	2.06522
RIPK1	0.191489	0.70922	0.0992908	0.27	0.14	0.518519	0.236842	2.43902	0.110236	141					RIPK1	0.191489	0.70922	0.0992908	RIPK1	0.191489	0.70922	0.0992908									RIPK1	0.27	0.14	0.518519	RIPK1	0.27	0.14	0.518519									RIPK1	0.236842	2.43902
NFXL1_ENST00000329043	0.145038	0.755725	0.0992366	0.191919	0.131313	0.684211	0.169643	3.09375	0.110169	131					NFXL1_ENST00000329043	0.145038	0.755725	0.0992366	NFXL1_ENST00000329043	0.145038	0.755725	0.0992366									NFXL1_ENST00000329043	0.191919	0.131313	0.684211	NFXL1_ENST00000329043	0.191919	0.131313	0.684211									NFXL1_ENST00000329043	0.169643	3.09375
BTBD16	0.280992	0.619835	0.0991736	0.453333	0.16	0.352941	0.390805	1.63043	0.110092	121					BTBD16	0.280992	0.619835	0.0991736	BTBD16	0.280992	0.619835	0.0991736									BTBD16	0.453333	0.16	0.352941	BTBD16	0.453333	0.16	0.352941									BTBD16	0.390805	1.63043
FOXJ2_ENST00000428177	0.190083	0.710744	0.0991736	0.267442	0.139535	0.521739	0.234694	2.45714	0.110092	121					FOXJ2_ENST00000428177	0.190083	0.710744	0.0991736	FOXJ2_ENST00000428177	0.190083	0.710744	0.0991736									FOXJ2_ENST00000428177	0.267442	0.139535	0.521739	FOXJ2_ENST00000428177	0.267442	0.139535	0.521739									FOXJ2_ENST00000428177	0.234694	2.45714
NUDCD1	0.123967	0.77686	0.0991736	0.159574	0.12766	0.8	0.141509	3.48148	0.110092	121					NUDCD1	0.123967	0.77686	0.0991736	NUDCD1	0.123967	0.77686	0.0991736									NUDCD1	0.159574	0.12766	0.8	NUDCD1	0.159574	0.12766	0.8									NUDCD1	0.141509	3.48148
UNC80	0.140496	0.760331	0.0991736	0.184783	0.130435	0.705882	0.163462	3.17241	0.110092	121					UNC80	0.140496	0.760331	0.0991736	UNC80	0.140496	0.760331	0.0991736									UNC80	0.184783	0.130435	0.705882	UNC80	0.184783	0.130435	0.705882									UNC80	0.163462	3.17241
PRC1	0.239669	0.661157	0.0991736	0.3625	0.15	0.413793	0.315217	1.95122	0.110092	121					PRC1	0.239669	0.661157	0.0991736	PRC1	0.239669	0.661157	0.0991736									PRC1	0.3625	0.15	0.413793	PRC1	0.3625	0.15	0.413793									PRC1	0.315217	1.95122
ZNF233	0.247934	0.652893	0.0991736	0.379747	0.151899	0.4	0.32967	1.88095	0.110092	121					ZNF233	0.247934	0.652893	0.0991736	ZNF233	0.247934	0.652893	0.0991736									ZNF233	0.379747	0.151899	0.4	ZNF233	0.379747	0.151899	0.4									ZNF233	0.32967	1.88095
SLC13A3_ENST00000372121	0.396396	0.504505	0.0990991	0.785714	0.196429	0.25	0.656716	1.01818	0.11	111					SLC13A3_ENST00000372121	0.396396	0.504505	0.0990991					SLC13A3_ENST00000372121	0.396396	0.504505	0.0990991					SLC13A3_ENST00000372121	0.785714	0.196429	0.25					SLC13A3_ENST00000372121	0.785714	0.25	0.25					SLC13A3_ENST00000372121	0.656716	1.01818
MTAC2D1	0.252252	0.648649	0.0990991	0.388889	0.152778	0.392857	0.337349	1.84615	0.11	111					MTAC2D1	0.252252	0.648649	0.0990991	MTAC2D1	0.252252	0.648649	0.0990991									MTAC2D1	0.388889	0.152778	0.392857	MTAC2D1	0.388889	0.152778	0.392857									MTAC2D1	0.337349	1.84615
PCF11_ENST00000298281	0.189189	0.711712	0.0990991	0.265823	0.139241	0.52381	0.233333	2.46875	0.11	333					PCF11_ENST00000298281	0.189189	0.711712	0.0990991	PCF11_ENST00000298281	0.189189	0.711712	0.0990991									PCF11_ENST00000298281	0.265823	0.139241	0.52381	PCF11_ENST00000298281	0.265823	0.139241	0.52381									PCF11_ENST00000298281	0.233333	2.46875
TRIP4	0.216216	0.684685	0.0990991	0.315789	0.144737	0.458333	0.275862	2.17143	0.11	111					TRIP4	0.216216	0.684685	0.0990991	TRIP4	0.216216	0.684685	0.0990991									TRIP4	0.315789	0.144737	0.458333	TRIP4	0.315789	0.144737	0.458333									TRIP4	0.275862	2.17143
ZNF77	0.288288	0.612613	0.0990991	0.470588	0.161765	0.34375	0.405063	1.5814	0.11	111					ZNF77	0.288288	0.612613	0.0990991	ZNF77	0.288288	0.612613	0.0990991									ZNF77	0.470588	0.161765	0.34375	ZNF77	0.470588	0.161765	0.34375									ZNF77	0.405063	1.5814
ACBD3	0.227723	0.673267	0.0990099	0.338235	0.147059	0.434783	0.294872	2.06061	0.10989	101					ACBD3	0.227723	0.673267	0.0990099	ACBD3	0.227723	0.673267	0.0990099									ACBD3	0.338235	0.147059	0.434783	ACBD3	0.338235	0.147059	0.434783									ACBD3	0.294872	2.06061
EXOC6B_ENST00000272427	0.227723	0.673267	0.0990099	0.338235	0.147059	0.434783	0.294872	2.06061	0.10989	202					EXOC6B_ENST00000272427	0.227723	0.673267	0.0990099	EXOC6B_ENST00000272427	0.227723	0.673267	0.0990099									EXOC6B_ENST00000272427	0.338235	0.147059	0.434783	EXOC6B_ENST00000272427	0.338235	0.147059	0.434783									EXOC6B_ENST00000272427	0.294872	2.06061
TRIM38	0.247525	0.653465	0.0990099	0.378788	0.151515	0.4	0.328947	1.88571	0.10989	101					TRIM38	0.247525	0.653465	0.0990099	TRIM38	0.247525	0.653465	0.0990099									TRIM38	0.378788	0.151515	0.4	TRIM38	0.378788	0.151515	0.4									TRIM38	0.328947	1.88571
ZNF451	0.197917	0.703125	0.0989583	0.281481	0.140741	0.5	0.246753	2.36842	0.109827	192					ZNF451	0.197917	0.703125	0.0989583	ZNF451	0.197917	0.703125	0.0989583									ZNF451	0.281481	0.140741	0.5	ZNF451	0.281481	0.140741	0.5									ZNF451	0.246753	2.36842
TNFAIP3	0.176678	0.724382	0.0989399	0.243902	0.136585	0.56	0.214592	2.62821	0.109804	283					TNFAIP3	0.176678	0.724382	0.0989399	TNFAIP3	0.176678	0.724382	0.0989399									TNFAIP3	0.243902	0.136585	0.56	TNFAIP3	0.243902	0.136585	0.56									TNFAIP3	0.214592	2.62821
LOC168850	0.208791	0.692308	0.0989011	0.301587	0.142857	0.473684	0.263889	2.25	0.109756	182					LOC168850	0.208791	0.692308	0.0989011	LOC168850	0.208791	0.692308	0.0989011									LOC168850	0.301587	0.142857	0.473684	LOC168850	0.301587	0.142857	0.473684									LOC168850	0.263889	2.25
TP53BP1	0.172414	0.728736	0.0988506	0.236593	0.135647	0.573333	0.208333	2.68644	0.109694	435					TP53BP1	0.172414	0.728736	0.0988506	TP53BP1	0.172414	0.728736	0.0988506									TP53BP1	0.236593	0.135647	0.573333	TP53BP1	0.236593	0.135647	0.573333									TP53BP1	0.208333	2.68644
DDX4_ENST00000505374	0.117284	0.783951	0.0987654	0.149606	0.125984	0.842105	0.132867	3.62857	0.109589	162					DDX4_ENST00000505374	0.117284	0.783951	0.0987654					DDX4_ENST00000505374	0.117284	0.783951	0.0987654					DDX4_ENST00000505374	0.149606	0.125984	0.842105	DDX4_ENST00000505374	0.149606	0.125984	0.842105									DDX4_ENST00000505374	0.132867	3.62857
GXYLT1	0.183099	0.71831	0.0985915	0.254902	0.137255	0.538462	0.224138	2.55	0.109375	142					GXYLT1	0.183099	0.71831	0.0985915	GXYLT1	0.183099	0.71831	0.0985915									GXYLT1	0.254902	0.137255	0.538462	GXYLT1	0.254902	0.137255	0.538462									GXYLT1	0.224138	2.55
OLFM3	0.216749	0.684729	0.0985222	0.316547	0.143885	0.454545	0.27673	2.17188	0.10929	203					OLFM3	0.216749	0.684729	0.0985222	OLFM3	0.216749	0.684729	0.0985222									OLFM3	0.316547	0.143885	0.454545	OLFM3	0.316547	0.143885	0.454545									OLFM3	0.27673	2.17188
GPR152	0.348485	0.55303	0.0984848	0.630137	0.178082	0.282609	0.534884	1.23729	0.109244	132					GPR152	0.348485	0.55303	0.0984848					GPR152	0.348485	0.55303	0.0984848					GPR152	0.630137	0.178082	0.282609					GPR152	0.630137	0.282609	0.282609					GPR152	0.534884	1.23729
FLJ35880	0.160622	0.740933	0.0984456	0.216783	0.132867	0.612903	0.191358	2.86	0.109195	193					FLJ35880	0.160622	0.740933	0.0984456	FLJ35880	0.160622	0.740933	0.0984456									FLJ35880	0.216783	0.132867	0.612903	FLJ35880	0.216783	0.132867	0.612903									FLJ35880	0.191358	2.86
SMC6	0.165803	0.735751	0.0984456	0.225352	0.133803	0.59375	0.198758	2.78431	0.109195	193					SMC6	0.165803	0.735751	0.0984456	SMC6	0.165803	0.735751	0.0984456									SMC6	0.225352	0.133803	0.59375	SMC6	0.225352	0.133803	0.59375									SMC6	0.198758	2.78431
NACA2	0.229508	0.672131	0.0983607	0.341463	0.146341	0.428571	0.297872	2.05	0.109091	122					NACA2	0.229508	0.672131	0.0983607	NACA2	0.229508	0.672131	0.0983607									NACA2	0.341463	0.146341	0.428571	NACA2	0.341463	0.146341	0.428571									NACA2	0.297872	2.05
NOL10	0.172131	0.729508	0.0983607	0.235955	0.134831	0.571429	0.207921	2.69697	0.109091	122					NOL10	0.172131	0.729508	0.0983607	NOL10	0.172131	0.729508	0.0983607									NOL10	0.235955	0.134831	0.571429	NOL10	0.235955	0.134831	0.571429									NOL10	0.207921	2.69697
ADAMTSL3_ENST00000567476	0.210526	0.691228	0.0982456	0.304569	0.142132	0.466667	0.266667	2.23864	0.108949	285					ADAMTSL3_ENST00000567476	0.210526	0.691228	0.0982456	ADAMTSL3_ENST00000567476	0.210526	0.691228	0.0982456									ADAMTSL3_ENST00000567476	0.304569	0.142132	0.466667	ADAMTSL3_ENST00000567476	0.304569	0.142132	0.466667									ADAMTSL3_ENST00000567476	0.266667	2.23864
PAN3_ENST00000282391	0.205357	0.696429	0.0982143	0.294872	0.141026	0.478261	0.258427	2.29412	0.108911	112					PAN3_ENST00000282391	0.205357	0.696429	0.0982143	PAN3_ENST00000282391	0.205357	0.696429	0.0982143									PAN3_ENST00000282391	0.294872	0.141026	0.478261	PAN3_ENST00000282391	0.294872	0.141026	0.478261									PAN3_ENST00000282391	0.258427	2.29412
KIAA0528_ENST00000544930	0.222222	0.679739	0.0980392	0.326923	0.144231	0.441176	0.285714	2.12245	0.108696	153					KIAA0528_ENST00000544930	0.222222	0.679739	0.0980392	KIAA0528_ENST00000544930	0.222222	0.679739	0.0980392									KIAA0528_ENST00000544930	0.326923	0.144231	0.441176	KIAA0528_ENST00000544930	0.326923	0.144231	0.441176									KIAA0528_ENST00000544930	0.285714	2.12245
MEGF9	0.147059	0.754902	0.0980392	0.194805	0.12987	0.666667	0.172414	3.08	0.108696	102					MEGF9	0.147059	0.754902	0.0980392	MEGF9	0.147059	0.754902	0.0980392									MEGF9	0.194805	0.12987	0.666667	MEGF9	0.194805	0.12987	0.666667									MEGF9	0.172414	3.08
NOX3	0.210784	0.691176	0.0980392	0.304965	0.141844	0.465116	0.267081	2.2381	0.108696	204					NOX3	0.210784	0.691176	0.0980392	NOX3	0.210784	0.691176	0.0980392									NOX3	0.304965	0.141844	0.465116	NOX3	0.304965	0.141844	0.465116									NOX3	0.267081	2.2381
NR6A1	0.235294	0.666667	0.0980392	0.352941	0.147059	0.416667	0.307692	2	0.108696	102					NR6A1	0.235294	0.666667	0.0980392	NR6A1	0.235294	0.666667	0.0980392									NR6A1	0.352941	0.147059	0.416667	NR6A1	0.352941	0.147059	0.416667									NR6A1	0.307692	2
SESTD1	0.169935	0.732026	0.0980392	0.232143	0.133929	0.576923	0.204724	2.73171	0.108696	153					SESTD1	0.169935	0.732026	0.0980392	SESTD1	0.169935	0.732026	0.0980392									SESTD1	0.232143	0.133929	0.576923	SESTD1	0.232143	0.133929	0.576923									SESTD1	0.204724	2.73171
ZNF234	0.215686	0.686275	0.0980392	0.314286	0.142857	0.454545	0.275	2.1875	0.108696	153					ZNF234	0.215686	0.686275	0.0980392	ZNF234	0.215686	0.686275	0.0980392									ZNF234	0.314286	0.142857	0.454545	ZNF234	0.314286	0.142857	0.454545									ZNF234	0.275	2.1875
CRLF2	0.163399	0.738562	0.0980392	0.221239	0.132743	0.6	0.195312	2.825	0.108696	153					CRLF2	0.163399	0.738562	0.0980392	CRLF2	0.163399	0.738562	0.0980392									CRLF2	0.221239	0.132743	0.6	CRLF2	0.221239	0.132743	0.6									CRLF2	0.195312	2.825
KRT39	0.189542	0.712418	0.0980392	0.266055	0.137615	0.517241	0.233871	2.47727	0.108696	153					KRT39	0.189542	0.712418	0.0980392	KRT39	0.189542	0.712418	0.0980392									KRT39	0.266055	0.137615	0.517241	KRT39	0.266055	0.137615	0.517241									KRT39	0.233871	2.47727
OPTN	0.196078	0.705882	0.0980392	0.277778	0.138889	0.5	0.243902	2.4	0.108696	102					OPTN	0.196078	0.705882	0.0980392	OPTN	0.196078	0.705882	0.0980392									OPTN	0.277778	0.138889	0.5	OPTN	0.277778	0.138889	0.5									OPTN	0.243902	2.4
TNPO1	0.150327	0.751634	0.0980392	0.2	0.130435	0.652174	0.176923	3.02632	0.108696	153					TNPO1	0.150327	0.751634	0.0980392	TNPO1	0.150327	0.751634	0.0980392									TNPO1	0.2	0.130435	0.652174	TNPO1	0.2	0.130435	0.652174									TNPO1	0.176923	3.02632
MCTP1_ENST00000312216	0.236735	0.665306	0.0979592	0.355828	0.147239	0.413793	0.31016	1.9878	0.108597	245					MCTP1_ENST00000312216	0.236735	0.665306	0.0979592	MCTP1_ENST00000312216	0.236735	0.665306	0.0979592									MCTP1_ENST00000312216	0.355828	0.147239	0.413793	MCTP1_ENST00000312216	0.355828	0.147239	0.413793									MCTP1_ENST00000312216	0.31016	1.9878
SUN5	0.216783	0.685315	0.0979021	0.316327	0.142857	0.451613	0.276786	2.17778	0.108527	143					SUN5	0.216783	0.685315	0.0979021	SUN5	0.216783	0.685315	0.0979021									SUN5	0.316327	0.142857	0.451613	SUN5	0.316327	0.142857	0.451613									SUN5	0.276786	2.17778
PLK2	0.102222	0.8	0.0977778	0.127778	0.122222	0.956522	0.113861	4	0.108374	225					PLK2	0.102222	0.8	0.0977778					PLK2	0.102222	0.8	0.0977778					PLK2	0.127778	0.122222	0.956522	PLK2	0.127778	0.122222	0.956522									PLK2	0.113861	4
TNIP3	0.165414	0.736842	0.0977444	0.22449	0.132653	0.590909	0.198198	2.8	0.108333	133					TNIP3	0.165414	0.736842	0.0977444	TNIP3	0.165414	0.736842	0.0977444									TNIP3	0.22449	0.132653	0.590909	TNIP3	0.22449	0.132653	0.590909									TNIP3	0.198198	2.8
PCF11	0.195266	0.707101	0.0976331	0.276151	0.138075	0.5	0.242647	2.41414	0.108197	338					PCF11	0.195266	0.707101	0.0976331	PCF11	0.195266	0.707101	0.0976331									PCF11	0.276151	0.138075	0.5	PCF11	0.276151	0.138075	0.5									PCF11	0.242647	2.41414
CUL3	0.111498	0.790941	0.097561	0.140969	0.123348	0.875	0.12549	3.78333	0.108108	287					CUL3	0.111498	0.790941	0.097561					CUL3	0.111498	0.790941	0.097561					CUL3	0.140969	0.123348	0.875	CUL3	0.140969	0.123348	0.875									CUL3	0.12549	3.78333
IFI16_ENST00000295809	0.189024	0.713415	0.097561	0.264957	0.136752	0.516129	0.233083	2.48936	0.108108	164					IFI16_ENST00000295809	0.189024	0.713415	0.097561	IFI16_ENST00000295809	0.189024	0.713415	0.097561									IFI16_ENST00000295809	0.264957	0.136752	0.516129	IFI16_ENST00000295809	0.264957	0.136752	0.516129									IFI16_ENST00000295809	0.233083	2.48936
KDM5B_ENST00000367265	0.216981	0.685535	0.0974843	0.316514	0.142202	0.449275	0.277108	2.18	0.108014	318					KDM5B_ENST00000367265	0.216981	0.685535	0.0974843	KDM5B_ENST00000367265	0.216981	0.685535	0.0974843									KDM5B_ENST00000367265	0.316514	0.142202	0.449275	KDM5B_ENST00000367265	0.316514	0.142202	0.449275									KDM5B_ENST00000367265	0.277108	2.18
BMP5	0.184116	0.718412	0.0974729	0.256281	0.135678	0.529412	0.225664	2.55128	0.108	277					BMP5	0.184116	0.718412	0.0974729	BMP5	0.184116	0.718412	0.0974729									BMP5	0.256281	0.135678	0.529412	BMP5	0.256281	0.135678	0.529412									BMP5	0.225664	2.55128
KIAA1586	0.221239	0.681416	0.0973451	0.324675	0.142857	0.44	0.284091	2.13889	0.107843	113					KIAA1586	0.221239	0.681416	0.0973451	KIAA1586	0.221239	0.681416	0.0973451									KIAA1586	0.324675	0.142857	0.44	KIAA1586	0.324675	0.142857	0.44									KIAA1586	0.284091	2.13889
NFKBIA	0.150442	0.752212	0.0973451	0.2	0.129412	0.647059	0.177083	3.03571	0.107843	113					NFKBIA	0.150442	0.752212	0.0973451	NFKBIA	0.150442	0.752212	0.0973451									NFKBIA	0.2	0.129412	0.647059	NFKBIA	0.2	0.129412	0.647059									NFKBIA	0.177083	3.03571
FXR2	0.238938	0.663717	0.0973451	0.36	0.146667	0.407407	0.313953	1.97368	0.107843	113					FXR2	0.238938	0.663717	0.0973451	FXR2	0.238938	0.663717	0.0973451									FXR2	0.36	0.146667	0.407407	FXR2	0.36	0.146667	0.407407									FXR2	0.313953	1.97368
SESN3	0.168142	0.734513	0.0973451	0.228916	0.13253	0.578947	0.202128	2.76667	0.107843	113					SESN3	0.168142	0.734513	0.0973451	SESN3	0.168142	0.734513	0.0973451									SESN3	0.228916	0.13253	0.578947	SESN3	0.228916	0.13253	0.578947									SESN3	0.202128	2.76667
WNT10B	0.185841	0.716814	0.0973451	0.259259	0.135802	0.52381	0.228261	2.53125	0.107843	113					WNT10B	0.185841	0.716814	0.0973451	WNT10B	0.185841	0.716814	0.0973451									WNT10B	0.259259	0.135802	0.52381	WNT10B	0.259259	0.135802	0.52381									WNT10B	0.228261	2.53125
MCM7_ENST00000303887	0.275676	0.627027	0.0972973	0.439655	0.155172	0.352941	0.380597	1.68116	0.107784	185					MCM7_ENST00000303887	0.275676	0.627027	0.0972973	MCM7_ENST00000303887	0.275676	0.627027	0.0972973									MCM7_ENST00000303887	0.439655	0.155172	0.352941	MCM7_ENST00000303887	0.439655	0.155172	0.352941									MCM7_ENST00000303887	0.380597	1.68116
HEATR5A_ENST00000389961	0.18677	0.715953	0.0972763	0.26087	0.13587	0.520833	0.229665	2.52055	0.107759	257					HEATR5A_ENST00000389961	0.18677	0.715953	0.0972763	HEATR5A_ENST00000389961	0.18677	0.715953	0.0972763									HEATR5A_ENST00000389961	0.26087	0.13587	0.520833	HEATR5A_ENST00000389961	0.26087	0.13587	0.520833									HEATR5A_ENST00000389961	0.229665	2.52055
DYRK3	0.1875	0.715278	0.0972222	0.262136	0.135922	0.518519	0.230769	2.5122	0.107692	144					DYRK3	0.1875	0.715278	0.0972222	DYRK3	0.1875	0.715278	0.0972222									DYRK3	0.262136	0.135922	0.518519	DYRK3	0.262136	0.135922	0.518519									DYRK3	0.230769	2.5122
NCKAP5_ENST00000405974	0.1875	0.715278	0.0972222	0.262136	0.135922	0.518519	0.230769	2.5122	0.107692	144					NCKAP5_ENST00000405974	0.1875	0.715278	0.0972222	NCKAP5_ENST00000405974	0.1875	0.715278	0.0972222									NCKAP5_ENST00000405974	0.262136	0.135922	0.518519	NCKAP5_ENST00000405974	0.262136	0.135922	0.518519									NCKAP5_ENST00000405974	0.230769	2.5122
ZNF583	0.148571	0.754286	0.0971429	0.19697	0.128788	0.653846	0.174497	3.06977	0.107595	175					ZNF583	0.148571	0.754286	0.0971429	ZNF583	0.148571	0.754286	0.0971429									ZNF583	0.19697	0.128788	0.653846	ZNF583	0.19697	0.128788	0.653846									ZNF583	0.174497	3.06977
TCHP	0.116505	0.786408	0.0970874	0.148148	0.123457	0.833333	0.131868	3.68182	0.107527	103					TCHP	0.116505	0.786408	0.0970874					TCHP	0.116505	0.786408	0.0970874					TCHP	0.148148	0.123457	0.833333	TCHP	0.148148	0.123457	0.833333									TCHP	0.131868	3.68182
HMMR	0.19403	0.708955	0.0970149	0.273684	0.136842	0.5	0.240741	2.4359	0.107438	134					HMMR	0.19403	0.708955	0.0970149	HMMR	0.19403	0.708955	0.0970149									HMMR	0.273684	0.136842	0.5	HMMR	0.273684	0.136842	0.5									HMMR	0.240741	2.4359
PLEKHM3	0.201493	0.701493	0.0970149	0.287234	0.138298	0.481481	0.252336	2.35	0.107438	134					PLEKHM3	0.201493	0.701493	0.0970149	PLEKHM3	0.201493	0.701493	0.0970149									PLEKHM3	0.287234	0.138298	0.481481	PLEKHM3	0.287234	0.138298	0.481481									PLEKHM3	0.252336	2.35
LEPR_ENST00000371059	0.168367	0.734694	0.0969388	0.229167	0.131944	0.575758	0.202454	2.76923	0.107345	196					LEPR_ENST00000371059	0.168367	0.734694	0.0969388	LEPR_ENST00000371059	0.168367	0.734694	0.0969388									LEPR_ENST00000371059	0.229167	0.131944	0.575758	LEPR_ENST00000371059	0.229167	0.131944	0.575758									LEPR_ENST00000371059	0.202454	2.76923
CCDC102B	0.204082	0.69898	0.0969388	0.291971	0.138686	0.475	0.25641	2.32203	0.107345	196					CCDC102B	0.204082	0.69898	0.0969388	CCDC102B	0.204082	0.69898	0.0969388									CCDC102B	0.291971	0.138686	0.475	CCDC102B	0.291971	0.138686	0.475									CCDC102B	0.25641	2.32203
WWP1	0.171806	0.731278	0.0969163	0.23494	0.13253	0.564103	0.207447	2.72131	0.107317	227					WWP1	0.171806	0.731278	0.0969163	WWP1	0.171806	0.731278	0.0969163									WWP1	0.23494	0.13253	0.564103	WWP1	0.23494	0.13253	0.564103									WWP1	0.207447	2.72131
NBEAL1_ENST00000449802	0.179177	0.723971	0.0968523	0.247492	0.133779	0.540541	0.218289	2.62281	0.107239	413					NBEAL1_ENST00000449802	0.179177	0.723971	0.0968523	NBEAL1_ENST00000449802	0.179177	0.723971	0.0968523									NBEAL1_ENST00000449802	0.247492	0.133779	0.540541	NBEAL1_ENST00000449802	0.247492	0.133779	0.540541									NBEAL1_ENST00000449802	0.218289	2.62281
SLC17A3	0.25	0.653226	0.0967742	0.382716	0.148148	0.387097	0.333333	1.88372	0.107143	124					SLC17A3	0.25	0.653226	0.0967742	SLC17A3	0.25	0.653226	0.0967742									SLC17A3	0.382716	0.148148	0.387097	SLC17A3	0.382716	0.148148	0.387097									SLC17A3	0.333333	1.88372
BBX	0.239631	0.663594	0.0967742	0.361111	0.145833	0.403846	0.315152	1.9726	0.107143	217					BBX	0.239631	0.663594	0.0967742	BBX	0.239631	0.663594	0.0967742									BBX	0.361111	0.145833	0.403846	BBX	0.361111	0.145833	0.403846									BBX	0.315152	1.9726
HELLS	0.2	0.703226	0.0967742	0.284404	0.137615	0.483871	0.25	2.36957	0.107143	155					HELLS	0.2	0.703226	0.0967742	HELLS	0.2	0.703226	0.0967742									HELLS	0.284404	0.137615	0.483871	HELLS	0.284404	0.137615	0.483871									HELLS	0.25	2.36957
SPEF2	0.187097	0.716129	0.0967742	0.261261	0.135135	0.517241	0.230159	2.52273	0.107143	155					SPEF2	0.187097	0.716129	0.0967742	SPEF2	0.187097	0.716129	0.0967742									SPEF2	0.261261	0.135135	0.517241	SPEF2	0.261261	0.135135	0.517241									SPEF2	0.230159	2.52273
ATAD5	0.174721	0.728625	0.0966543	0.239796	0.132653	0.553191	0.211712	2.68493	0.106996	269					ATAD5	0.174721	0.728625	0.0966543	ATAD5	0.174721	0.728625	0.0966543									ATAD5	0.239796	0.132653	0.553191	ATAD5	0.239796	0.132653	0.553191									ATAD5	0.211712	2.68493
GBA2	0.234483	0.668966	0.0965517	0.350515	0.14433	0.411765	0.306306	2.02083	0.10687	145					GBA2	0.234483	0.668966	0.0965517	GBA2	0.234483	0.668966	0.0965517									GBA2	0.350515	0.14433	0.411765	GBA2	0.350515	0.14433	0.411765									GBA2	0.306306	2.02083
TTC26	0.201754	0.701754	0.0964912	0.2875	0.1375	0.478261	0.252747	2.35294	0.106796	114					TTC26	0.201754	0.701754	0.0964912	TTC26	0.201754	0.701754	0.0964912									TTC26	0.2875	0.1375	0.478261	TTC26	0.2875	0.1375	0.478261									TTC26	0.252747	2.35294
TCTN3_ENST00000371217	0.219298	0.684211	0.0964912	0.320513	0.141026	0.44	0.280899	2.16667	0.106796	114					TCTN3_ENST00000371217	0.219298	0.684211	0.0964912	TCTN3_ENST00000371217	0.219298	0.684211	0.0964912									TCTN3_ENST00000371217	0.320513	0.141026	0.44	TCTN3_ENST00000371217	0.320513	0.141026	0.44									TCTN3_ENST00000371217	0.280899	2.16667
HRH4	0.210526	0.692982	0.0964912	0.303797	0.139241	0.458333	0.266667	2.25714	0.106796	114					HRH4	0.210526	0.692982	0.0964912	HRH4	0.210526	0.692982	0.0964912									HRH4	0.303797	0.139241	0.458333	HRH4	0.303797	0.139241	0.458333									HRH4	0.266667	2.25714
NSD1_ENST00000439151	0.120879	0.782662	0.0964591	0.154446	0.123245	0.79798	0.1375	3.60112	0.106757	819					NSD1_ENST00000439151	0.120879	0.782662	0.0964591	NSD1_ENST00000439151	0.120879	0.782662	0.0964591									NSD1_ENST00000439151	0.154446	0.123245	0.79798	NSD1_ENST00000439151	0.154446	0.123245	0.79798									NSD1_ENST00000439151	0.1375	3.60112
AHI1_ENST00000327035	0.120482	0.783133	0.0963855	0.153846	0.123077	0.8	0.136986	3.61111	0.106667	166					AHI1_ENST00000327035	0.120482	0.783133	0.0963855	AHI1_ENST00000327035	0.120482	0.783133	0.0963855									AHI1_ENST00000327035	0.153846	0.123077	0.8	AHI1_ENST00000327035	0.153846	0.123077	0.8									AHI1_ENST00000327035	0.136986	3.61111
CPA6	0.216867	0.686747	0.0963855	0.315789	0.140351	0.444444	0.276923	2.19231	0.106667	166					CPA6	0.216867	0.686747	0.0963855	CPA6	0.216867	0.686747	0.0963855									CPA6	0.315789	0.140351	0.444444	CPA6	0.315789	0.140351	0.444444									CPA6	0.276923	2.19231
MBD1	0.204819	0.698795	0.0963855	0.293103	0.137931	0.470588	0.257576	2.32	0.106667	166					MBD1	0.204819	0.698795	0.0963855	MBD1	0.204819	0.698795	0.0963855									MBD1	0.293103	0.137931	0.470588	MBD1	0.293103	0.137931	0.470588									MBD1	0.257576	2.32
MAP3K7	0.177778	0.725926	0.0962963	0.244898	0.132653	0.541667	0.216216	2.64865	0.106557	135					MAP3K7	0.177778	0.725926	0.0962963	MAP3K7	0.177778	0.725926	0.0962963									MAP3K7	0.244898	0.132653	0.541667	MAP3K7	0.244898	0.132653	0.541667									MAP3K7	0.216216	2.64865
MBD1_ENST00000339998	0.192593	0.711111	0.0962963	0.270833	0.135417	0.5	0.238532	2.46154	0.106557	135					MBD1_ENST00000339998	0.192593	0.711111	0.0962963	MBD1_ENST00000339998	0.192593	0.711111	0.0962963									MBD1_ENST00000339998	0.270833	0.135417	0.5	MBD1_ENST00000339998	0.270833	0.135417	0.5									MBD1_ENST00000339998	0.238532	2.46154
CENPE_ENST00000265148	0.170341	0.733467	0.0961924	0.23224	0.131148	0.564706	0.205314	2.75188	0.10643	499					CENPE_ENST00000265148	0.170341	0.733467	0.0961924	CENPE_ENST00000265148	0.170341	0.733467	0.0961924									CENPE_ENST00000265148	0.23224	0.131148	0.564706	CENPE_ENST00000265148	0.23224	0.131148	0.564706									CENPE_ENST00000265148	0.205314	2.75188
ALKBH8_ENST00000428149	0.173077	0.730769	0.0961538	0.236842	0.131579	0.555556	0.209302	2.71429	0.106383	104					ALKBH8_ENST00000428149	0.173077	0.730769	0.0961538	ALKBH8_ENST00000428149	0.173077	0.730769	0.0961538									ALKBH8_ENST00000428149	0.236842	0.131579	0.555556	ALKBH8_ENST00000428149	0.236842	0.131579	0.555556									ALKBH8_ENST00000428149	0.209302	2.71429
ZMYND10	0.307692	0.596154	0.0961538	0.516129	0.16129	0.3125	0.444444	1.47619	0.106383	104					ZMYND10	0.307692	0.596154	0.0961538					ZMYND10	0.307692	0.596154	0.0961538					ZMYND10	0.516129	0.16129	0.3125	ZMYND10	0.516129	0.16129	0.3125									ZMYND10	0.444444	1.47619
CNTLN_ENST00000262360	0.14	0.764	0.096	0.183246	0.125654	0.685714	0.162791	3.23729	0.106195	250					CNTLN_ENST00000262360	0.14	0.764	0.096	CNTLN_ENST00000262360	0.14	0.764	0.096									CNTLN_ENST00000262360	0.183246	0.125654	0.685714	CNTLN_ENST00000262360	0.183246	0.125654	0.685714									CNTLN_ENST00000262360	0.162791	3.23729
ZNF10	0.256	0.648	0.096	0.395062	0.148148	0.375	0.344086	1.84091	0.106195	125					ZNF10	0.256	0.648	0.096	ZNF10	0.256	0.648	0.096									ZNF10	0.395062	0.148148	0.375	ZNF10	0.395062	0.148148	0.375									ZNF10	0.344086	1.84091
SLC22A10	0.247475	0.656566	0.0959596	0.376923	0.146154	0.387755	0.328859	1.91176	0.106145	198					SLC22A10	0.247475	0.656566	0.0959596	SLC22A10	0.247475	0.656566	0.0959596									SLC22A10	0.376923	0.146154	0.387755	SLC22A10	0.376923	0.146154	0.387755									SLC22A10	0.328859	1.91176
ROCK2_ENST00000315872	0.140221	0.763838	0.095941	0.183575	0.125604	0.684211	0.16309	3.23437	0.106122	271					ROCK2_ENST00000315872	0.140221	0.763838	0.095941	ROCK2_ENST00000315872	0.140221	0.763838	0.095941									ROCK2_ENST00000315872	0.183575	0.125604	0.684211	ROCK2_ENST00000315872	0.183575	0.125604	0.684211									ROCK2_ENST00000315872	0.16309	3.23437
ROCK1_ENST00000399799	0.154982	0.749077	0.095941	0.206897	0.128079	0.619048	0.183406	2.98529	0.106122	271					ROCK1_ENST00000399799	0.154982	0.749077	0.095941	ROCK1_ENST00000399799	0.154982	0.749077	0.095941									ROCK1_ENST00000399799	0.206897	0.128079	0.619048	ROCK1_ENST00000399799	0.206897	0.128079	0.619048									ROCK1_ENST00000399799	0.183406	2.98529
TAF2_ENST00000378164	0.191781	0.712329	0.0958904	0.269231	0.134615	0.5	0.237288	2.47619	0.106061	219					TAF2_ENST00000378164	0.191781	0.712329	0.0958904	TAF2_ENST00000378164	0.191781	0.712329	0.0958904									TAF2_ENST00000378164	0.269231	0.134615	0.5	TAF2_ENST00000378164	0.269231	0.134615	0.5									TAF2_ENST00000378164	0.237288	2.47619
PDCD1	0.123288	0.780822	0.0958904	0.157895	0.122807	0.777778	0.140625	3.5625	0.106061	146					PDCD1	0.123288	0.780822	0.0958904	PDCD1	0.123288	0.780822	0.0958904									PDCD1	0.157895	0.122807	0.777778	PDCD1	0.157895	0.122807	0.777778									PDCD1	0.140625	3.5625
SLC2A2	0.253425	0.650685	0.0958904	0.389474	0.147368	0.378378	0.33945	1.86275	0.106061	146					SLC2A2	0.253425	0.650685	0.0958904	SLC2A2	0.253425	0.650685	0.0958904									SLC2A2	0.389474	0.147368	0.378378	SLC2A2	0.389474	0.147368	0.378378									SLC2A2	0.33945	1.86275
RUNX1_ENST00000486278	0.0479042	0.856287	0.0958084	0.0559441	0.111888	2	0.0503145	5.95833	0.10596	167					RUNX1_ENST00000486278	0.0479042	0.856287	0.0958084					RUNX1_ENST00000486278	0.0479042	0.856287	0.0958084					RUNX1_ENST00000486278	0.0559441	0.111888	2					RUNX1_ENST00000486278	0.0559441	2	2					RUNX1_ENST00000486278	0.0503145	5.95833
RAPGEF6_ENST00000307984	0.183908	0.720307	0.0957854	0.255319	0.132979	0.520833	0.225352	2.57534	0.105932	261					RAPGEF6_ENST00000307984	0.183908	0.720307	0.0957854	RAPGEF6_ENST00000307984	0.183908	0.720307	0.0957854									RAPGEF6_ENST00000307984	0.255319	0.132979	0.520833	RAPGEF6_ENST00000307984	0.255319	0.132979	0.520833									RAPGEF6_ENST00000307984	0.225352	2.57534
SMAD3_ENST00000439724	0.122605	0.781609	0.0957854	0.156863	0.122549	0.78125	0.139738	3.57895	0.105932	261					SMAD3_ENST00000439724	0.122605	0.781609	0.0957854	SMAD3_ENST00000439724	0.122605	0.781609	0.0957854									SMAD3_ENST00000439724	0.156863	0.122549	0.78125	SMAD3_ENST00000439724	0.156863	0.122549	0.78125									SMAD3_ENST00000439724	0.139738	3.57895
RAPGEF6_ENST00000509018	0.202128	0.702128	0.0957447	0.287879	0.136364	0.473684	0.253333	2.35714	0.105882	282					RAPGEF6_ENST00000509018	0.202128	0.702128	0.0957447	RAPGEF6_ENST00000509018	0.202128	0.702128	0.0957447									RAPGEF6_ENST00000509018	0.287879	0.136364	0.473684	RAPGEF6_ENST00000509018	0.287879	0.136364	0.473684									RAPGEF6_ENST00000509018	0.253333	2.35714
LRRIQ1	0.187234	0.717021	0.0957447	0.261128	0.133531	0.511364	0.230366	2.53383	0.105882	470					LRRIQ1	0.187234	0.717021	0.0957447	LRRIQ1	0.187234	0.717021	0.0957447									LRRIQ1	0.261128	0.133531	0.511364	LRRIQ1	0.261128	0.133531	0.511364									LRRIQ1	0.230366	2.53383
CTSC	0.147826	0.756522	0.0956522	0.195402	0.126437	0.647059	0.173469	3.10714	0.105769	115					CTSC	0.147826	0.756522	0.0956522	CTSC	0.147826	0.756522	0.0956522									CTSC	0.195402	0.126437	0.647059	CTSC	0.195402	0.126437	0.647059									CTSC	0.173469	3.10714
ATP6V1C2_ENST00000272238	0.278261	0.626087	0.0956522	0.444444	0.152778	0.34375	0.385542	1.67442	0.105769	115					ATP6V1C2_ENST00000272238	0.278261	0.626087	0.0956522	ATP6V1C2_ENST00000272238	0.278261	0.626087	0.0956522									ATP6V1C2_ENST00000272238	0.444444	0.152778	0.34375	ATP6V1C2_ENST00000272238	0.444444	0.152778	0.34375									ATP6V1C2_ENST00000272238	0.385542	1.67442
FEZ1	0.269565	0.634783	0.0956522	0.424658	0.150685	0.354839	0.369048	1.7381	0.105769	115					FEZ1	0.269565	0.634783	0.0956522	FEZ1	0.269565	0.634783	0.0956522									FEZ1	0.424658	0.150685	0.354839	FEZ1	0.424658	0.150685	0.354839									FEZ1	0.369048	1.7381
NGLY1	0.154412	0.75	0.0955882	0.205882	0.127451	0.619048	0.182609	3	0.105691	136					NGLY1	0.154412	0.75	0.0955882	NGLY1	0.154412	0.75	0.0955882									NGLY1	0.205882	0.127451	0.619048	NGLY1	0.205882	0.127451	0.619048									NGLY1	0.182609	3
ROCK2	0.139706	0.764706	0.0955882	0.182692	0.125	0.684211	0.162393	3.25	0.105691	272					ROCK2	0.139706	0.764706	0.0955882	ROCK2	0.139706	0.764706	0.0955882									ROCK2	0.182692	0.125	0.684211	ROCK2	0.182692	0.125	0.684211									ROCK2	0.162393	3.25
USP15_ENST00000393654	0.169118	0.735294	0.0955882	0.23	0.13	0.565217	0.20354	2.77778	0.105691	136					USP15_ENST00000393654	0.169118	0.735294	0.0955882	USP15_ENST00000393654	0.169118	0.735294	0.0955882									USP15_ENST00000393654	0.23	0.13	0.565217	USP15_ENST00000393654	0.23	0.13	0.565217									USP15_ENST00000393654	0.20354	2.77778
NSD1	0.122128	0.782346	0.095526	0.156105	0.122102	0.782178	0.139118	3.59444	0.105615	827					NSD1	0.122128	0.782346	0.095526	NSD1	0.122128	0.782346	0.095526									NSD1	0.156105	0.122102	0.782178	NSD1	0.156105	0.122102	0.782178									NSD1	0.139118	3.59444
CEP290	0.146067	0.758427	0.0955056	0.192593	0.125926	0.653846	0.171053	3.13953	0.10559	356					CEP290	0.146067	0.758427	0.0955056	CEP290	0.146067	0.758427	0.0955056									CEP290	0.192593	0.125926	0.653846	CEP290	0.192593	0.125926	0.653846									CEP290	0.171053	3.13953
INPP5J_ENST00000331075	0.219101	0.685393	0.0955056	0.319672	0.139344	0.435897	0.280576	2.17857	0.10559	178					INPP5J_ENST00000331075	0.219101	0.685393	0.0955056	INPP5J_ENST00000331075	0.219101	0.685393	0.0955056									INPP5J_ENST00000331075	0.319672	0.139344	0.435897	INPP5J_ENST00000331075	0.319672	0.139344	0.435897									INPP5J_ENST00000331075	0.280576	2.17857
ZNF432	0.174157	0.730337	0.0955056	0.238462	0.130769	0.548387	0.210884	2.70833	0.10559	178					ZNF432	0.174157	0.730337	0.0955056	ZNF432	0.174157	0.730337	0.0955056									ZNF432	0.238462	0.130769	0.548387	ZNF432	0.238462	0.130769	0.548387									ZNF432	0.210884	2.70833
ZNF238	0.340136	0.564626	0.0952381	0.60241	0.168675	0.28	0.515464	1.29688	0.105263	147					ZNF238	0.340136	0.564626	0.0952381					ZNF238	0.340136	0.564626	0.0952381					ZNF238	0.60241	0.168675	0.28					ZNF238	0.60241	0.28	0.28					ZNF238	0.515464	1.29688
ANAPC7	0.180952	0.72381	0.0952381	0.25	0.131579	0.526316	0.22093	2.62069	0.105263	105					ANAPC7	0.180952	0.72381	0.0952381	ANAPC7	0.180952	0.72381	0.0952381									ANAPC7	0.25	0.131579	0.526316	ANAPC7	0.25	0.131579	0.526316									ANAPC7	0.22093	2.62069
DYRK3_ENST00000367109	0.183673	0.721088	0.0952381	0.254717	0.132075	0.518519	0.225	2.58537	0.105263	147					DYRK3_ENST00000367109	0.183673	0.721088	0.0952381	DYRK3_ENST00000367109	0.183673	0.721088	0.0952381									DYRK3_ENST00000367109	0.254717	0.132075	0.518519	DYRK3_ENST00000367109	0.254717	0.132075	0.518519									DYRK3_ENST00000367109	0.225	2.58537
PACRG	0.228571	0.67619	0.0952381	0.338028	0.140845	0.416667	0.296296	2.08824	0.105263	105					PACRG	0.228571	0.67619	0.0952381	PACRG	0.228571	0.67619	0.0952381									PACRG	0.338028	0.140845	0.416667	PACRG	0.338028	0.140845	0.416667									PACRG	0.296296	2.08824
SMAD3	0.107937	0.796825	0.0952381	0.135458	0.119522	0.882353	0.120996	3.92188	0.105263	315					SMAD3	0.107937	0.796825	0.0952381					SMAD3	0.107937	0.796825	0.0952381					SMAD3	0.135458	0.119522	0.882353	SMAD3	0.135458	0.119522	0.882353									SMAD3	0.120996	3.92188
ZNF433	0.222222	0.68254	0.0952381	0.325581	0.139535	0.428571	0.285714	2.15	0.105263	126					ZNF433	0.222222	0.68254	0.0952381	ZNF433	0.222222	0.68254	0.0952381									ZNF433	0.325581	0.139535	0.428571	ZNF433	0.325581	0.139535	0.428571									ZNF433	0.285714	2.15
ZNF510	0.198413	0.706349	0.0952381	0.280899	0.134831	0.48	0.247525	2.40541	0.105263	126					ZNF510	0.198413	0.706349	0.0952381	ZNF510	0.198413	0.706349	0.0952381									ZNF510	0.280899	0.134831	0.48	ZNF510	0.280899	0.134831	0.48									ZNF510	0.247525	2.40541
GATA3	0.208226	0.696658	0.0951157	0.298893	0.136531	0.45679	0.262987	2.29661	0.105114	389					GATA3	0.208226	0.696658	0.0951157	GATA3	0.208226	0.696658	0.0951157									GATA3	0.298893	0.136531	0.45679	GATA3	0.298893	0.136531	0.45679									GATA3	0.262987	2.29661
MLLT10_ENST00000307729	0.165	0.74	0.095	0.222973	0.128378	0.575758	0.197605	2.84615	0.104972	200					MLLT10_ENST00000307729	0.165	0.74	0.095	MLLT10_ENST00000307729	0.165	0.74	0.095									MLLT10_ENST00000307729	0.222973	0.128378	0.575758	MLLT10_ENST00000307729	0.222973	0.128378	0.575758									MLLT10_ENST00000307729	0.197605	2.84615
ZC3H11A	0.221519	0.683544	0.0949367	0.324074	0.138889	0.428571	0.284553	2.16	0.104895	158					ZC3H11A	0.221519	0.683544	0.0949367	ZC3H11A	0.221519	0.683544	0.0949367									ZC3H11A	0.324074	0.138889	0.428571	ZC3H11A	0.324074	0.138889	0.428571									ZC3H11A	0.284553	2.16
APPL1	0.167883	0.737226	0.0948905	0.227723	0.128713	0.565217	0.201754	2.80556	0.104839	137					APPL1	0.167883	0.737226	0.0948905	APPL1	0.167883	0.737226	0.0948905									APPL1	0.227723	0.128713	0.565217	APPL1	0.227723	0.128713	0.565217									APPL1	0.201754	2.80556
ZNF480_ENST00000468240	0.226277	0.678832	0.0948905	0.333333	0.139785	0.419355	0.292453	2.11364	0.104839	137					ZNF480_ENST00000468240	0.226277	0.678832	0.0948905	ZNF480_ENST00000468240	0.226277	0.678832	0.0948905									ZNF480_ENST00000468240	0.333333	0.139785	0.419355	ZNF480_ENST00000468240	0.333333	0.139785	0.419355									ZNF480_ENST00000468240	0.292453	2.11364
ATP6V1B1	0.284672	0.620438	0.0948905	0.458824	0.152941	0.333333	0.397959	1.63462	0.104839	137					ATP6V1B1	0.284672	0.620438	0.0948905	ATP6V1B1	0.284672	0.620438	0.0948905									ATP6V1B1	0.458824	0.152941	0.333333	ATP6V1B1	0.458824	0.152941	0.333333									ATP6V1B1	0.397959	1.63462
SYNCRIP	0.257895	0.647368	0.0947368	0.398374	0.146341	0.367347	0.347518	1.83582	0.104651	190					SYNCRIP	0.257895	0.647368	0.0947368	SYNCRIP	0.257895	0.647368	0.0947368									SYNCRIP	0.398374	0.146341	0.367347	SYNCRIP	0.398374	0.146341	0.367347									SYNCRIP	0.347518	1.83582
SH2B1	0.224852	0.680473	0.0946746	0.330435	0.13913	0.421053	0.290076	2.12963	0.104575	169					SH2B1	0.224852	0.680473	0.0946746	SH2B1	0.224852	0.680473	0.0946746									SH2B1	0.330435	0.13913	0.421053	SH2B1	0.330435	0.13913	0.421053									SH2B1	0.290076	2.12963
C18orf34	0.138801	0.766562	0.0946372	0.18107	0.123457	0.681818	0.161172	3.28378	0.10453	317					C18orf34	0.138801	0.766562	0.0946372	C18orf34	0.138801	0.766562	0.0946372									C18orf34	0.18107	0.123457	0.681818	C18orf34	0.18107	0.123457	0.681818									C18orf34	0.161172	3.28378
IPO11_ENST00000409296	0.175676	0.72973	0.0945946	0.240741	0.12963	0.538462	0.213115	2.7	0.104478	148					IPO11_ENST00000409296	0.175676	0.72973	0.0945946	IPO11_ENST00000409296	0.175676	0.72973	0.0945946									IPO11_ENST00000409296	0.240741	0.12963	0.538462	IPO11_ENST00000409296	0.240741	0.12963	0.538462									IPO11_ENST00000409296	0.213115	2.7
BMPR1A	0.148649	0.756757	0.0945946	0.196429	0.125	0.636364	0.174603	3.11111	0.104478	148					BMPR1A	0.148649	0.756757	0.0945946	BMPR1A	0.148649	0.756757	0.0945946									BMPR1A	0.196429	0.125	0.636364	BMPR1A	0.196429	0.125	0.636364									BMPR1A	0.174603	3.11111
RALBP1	0.216216	0.689189	0.0945946	0.313725	0.137255	0.4375	0.275862	2.21739	0.104478	148					RALBP1	0.216216	0.689189	0.0945946	RALBP1	0.216216	0.689189	0.0945946									RALBP1	0.313725	0.137255	0.4375	RALBP1	0.313725	0.137255	0.4375									RALBP1	0.275862	2.21739
RFX3_ENST00000382004	0.216216	0.689189	0.0945946	0.313725	0.137255	0.4375	0.275862	2.21739	0.104478	148					RFX3_ENST00000382004	0.216216	0.689189	0.0945946	RFX3_ENST00000382004	0.216216	0.689189	0.0945946									RFX3_ENST00000382004	0.313725	0.137255	0.4375	RFX3_ENST00000382004	0.313725	0.137255	0.4375									RFX3_ENST00000382004	0.275862	2.21739
TEC	0.216216	0.689189	0.0945946	0.313725	0.137255	0.4375	0.275862	2.21739	0.104478	148					TEC	0.216216	0.689189	0.0945946	TEC	0.216216	0.689189	0.0945946									TEC	0.313725	0.137255	0.4375	TEC	0.313725	0.137255	0.4375									TEC	0.275862	2.21739
PLEKHM3_ENST00000427836	0.204724	0.700787	0.0944882	0.292135	0.134831	0.461538	0.257426	2.34211	0.104348	127					PLEKHM3_ENST00000427836	0.204724	0.700787	0.0944882	PLEKHM3_ENST00000427836	0.204724	0.700787	0.0944882									PLEKHM3_ENST00000427836	0.292135	0.134831	0.461538	PLEKHM3_ENST00000427836	0.292135	0.134831	0.461538									PLEKHM3_ENST00000427836	0.257426	2.34211
CHD8_ENST00000430710	0.157303	0.748315	0.094382	0.21021	0.126126	0.6	0.186667	2.97321	0.104218	445					CHD8_ENST00000430710	0.157303	0.748315	0.094382	CHD8_ENST00000430710	0.157303	0.748315	0.094382									CHD8_ENST00000430710	0.21021	0.126126	0.6	CHD8_ENST00000430710	0.21021	0.126126	0.6									CHD8_ENST00000430710	0.186667	2.97321
ALKBH8_ENST00000417449	0.169811	0.735849	0.0943396	0.230769	0.128205	0.555556	0.204545	2.78571	0.104167	106					ALKBH8_ENST00000417449	0.169811	0.735849	0.0943396	ALKBH8_ENST00000417449	0.169811	0.735849	0.0943396									ALKBH8_ENST00000417449	0.230769	0.128205	0.555556	ALKBH8_ENST00000417449	0.230769	0.128205	0.555556									ALKBH8_ENST00000417449	0.204545	2.78571
HLA-C_ENST00000539307	0.169811	0.735849	0.0943396	0.230769	0.128205	0.555556	0.204545	2.78571	0.104167	106					HLA-C_ENST00000539307	0.169811	0.735849	0.0943396	HLA-C_ENST00000539307	0.169811	0.735849	0.0943396									HLA-C_ENST00000539307	0.230769	0.128205	0.555556	HLA-C_ENST00000539307	0.230769	0.128205	0.555556									HLA-C_ENST00000539307	0.204545	2.78571
KIAA1598_ENST00000355371	0.160377	0.745283	0.0943396	0.21519	0.126582	0.588235	0.191011	2.92593	0.104167	106					KIAA1598_ENST00000355371	0.160377	0.745283	0.0943396	KIAA1598_ENST00000355371	0.160377	0.745283	0.0943396									KIAA1598_ENST00000355371	0.21519	0.126582	0.588235	KIAA1598_ENST00000355371	0.21519	0.126582	0.588235									KIAA1598_ENST00000355371	0.191011	2.92593
KIF5B	0.157233	0.748428	0.0943396	0.210084	0.12605	0.6	0.186567	2.975	0.104167	159					KIF5B	0.157233	0.748428	0.0943396	KIF5B	0.157233	0.748428	0.0943396									KIF5B	0.210084	0.12605	0.6	KIF5B	0.210084	0.12605	0.6									KIF5B	0.186567	2.975
KIF5B_ENST00000302418	0.157233	0.748428	0.0943396	0.210084	0.12605	0.6	0.186567	2.975	0.104167	159					KIF5B_ENST00000302418	0.157233	0.748428	0.0943396	KIF5B_ENST00000302418	0.157233	0.748428	0.0943396									KIF5B_ENST00000302418	0.210084	0.12605	0.6	KIF5B_ENST00000302418	0.210084	0.12605	0.6									KIF5B_ENST00000302418	0.186567	2.975
TTC39B_ENST00000380850	0.283019	0.622642	0.0943396	0.454545	0.151515	0.333333	0.394737	1.65	0.104167	106					TTC39B_ENST00000380850	0.283019	0.622642	0.0943396	TTC39B_ENST00000380850	0.283019	0.622642	0.0943396									TTC39B_ENST00000380850	0.454545	0.151515	0.333333	TTC39B_ENST00000380850	0.454545	0.151515	0.333333									TTC39B_ENST00000380850	0.394737	1.65
USP6_ENST00000304328	0.20283	0.70283	0.0943396	0.288591	0.134228	0.465116	0.254438	2.36508	0.104167	212					USP6_ENST00000304328	0.20283	0.70283	0.0943396	USP6_ENST00000304328	0.20283	0.70283	0.0943396									USP6_ENST00000304328	0.288591	0.134228	0.465116	USP6_ENST00000304328	0.288591	0.134228	0.465116									USP6_ENST00000304328	0.254438	2.36508
ZBTB24	0.207547	0.698113	0.0943396	0.297297	0.135135	0.454545	0.261905	2.3125	0.104167	106					ZBTB24	0.207547	0.698113	0.0943396	ZBTB24	0.207547	0.698113	0.0943396									ZBTB24	0.297297	0.135135	0.454545	ZBTB24	0.297297	0.135135	0.454545									ZBTB24	0.261905	2.3125
CNTLN	0.16	0.745714	0.0942857	0.214559	0.126437	0.589286	0.190476	2.93258	0.104101	350					CNTLN	0.16	0.745714	0.0942857	CNTLN	0.16	0.745714	0.0942857									CNTLN	0.214559	0.126437	0.589286	CNTLN	0.214559	0.126437	0.589286									CNTLN	0.190476	2.93258
BRCA2_ENST00000544455	0.108133	0.797597	0.0942699	0.135574	0.118192	0.871795	0.121244	3.94064	0.104082	1082					BRCA2_ENST00000544455	0.108133	0.797597	0.0942699					BRCA2_ENST00000544455	0.108133	0.797597	0.0942699					BRCA2_ENST00000544455	0.135574	0.118192	0.871795	BRCA2_ENST00000544455	0.135574	0.118192	0.871795									BRCA2_ENST00000544455	0.121244	3.94064
JMY_ENST00000396137	0.183246	0.722513	0.0942408	0.253623	0.130435	0.514286	0.224359	2.60377	0.104046	191					JMY_ENST00000396137	0.183246	0.722513	0.0942408	JMY_ENST00000396137	0.183246	0.722513	0.0942408									JMY_ENST00000396137	0.253623	0.130435	0.514286	JMY_ENST00000396137	0.253623	0.130435	0.514286									JMY_ENST00000396137	0.224359	2.60377
TDRD3	0.195652	0.710145	0.0942029	0.27551	0.132653	0.481481	0.243243	2.45	0.104	138					TDRD3	0.195652	0.710145	0.0942029	TDRD3	0.195652	0.710145	0.0942029									TDRD3	0.27551	0.132653	0.481481	TDRD3	0.27551	0.132653	0.481481									TDRD3	0.243243	2.45
VPS13B_ENST00000355155	0.173913	0.731884	0.0942029	0.237624	0.128713	0.541667	0.210526	2.72973	0.104	138					VPS13B_ENST00000355155	0.173913	0.731884	0.0942029	VPS13B_ENST00000355155	0.173913	0.731884	0.0942029									VPS13B_ENST00000355155	0.237624	0.128713	0.541667	VPS13B_ENST00000355155	0.237624	0.128713	0.541667									VPS13B_ENST00000355155	0.210526	2.72973
QRFPR	0.205882	0.7	0.0941176	0.294118	0.134454	0.457143	0.259259	2.33333	0.103896	170					QRFPR	0.205882	0.7	0.0941176	QRFPR	0.205882	0.7	0.0941176									QRFPR	0.294118	0.134454	0.457143	QRFPR	0.294118	0.134454	0.457143									QRFPR	0.259259	2.33333
GPRASP1	0.222997	0.682927	0.0940767	0.326531	0.137755	0.421875	0.286996	2.15385	0.103846	287					GPRASP1	0.222997	0.682927	0.0940767	GPRASP1	0.222997	0.682927	0.0940767									GPRASP1	0.326531	0.137755	0.421875	GPRASP1	0.326531	0.137755	0.421875									GPRASP1	0.286996	2.15385
SMARCA4	0.113576	0.792369	0.094055	0.143337	0.118701	0.828125	0.128128	3.81624	0.10382	1127					SMARCA4	0.113576	0.792369	0.094055					SMARCA4	0.113576	0.792369	0.094055					SMARCA4	0.143337	0.118701	0.828125	SMARCA4	0.143337	0.118701	0.828125									SMARCA4	0.128128	3.81624
TOR1AIP1	0.222222	0.683761	0.0940171	0.325	0.1375	0.423077	0.285714	2.16216	0.103774	117					TOR1AIP1	0.222222	0.683761	0.0940171	TOR1AIP1	0.222222	0.683761	0.0940171									TOR1AIP1	0.325	0.1375	0.423077	TOR1AIP1	0.325	0.1375	0.423077									TOR1AIP1	0.285714	2.16216
FAM116A	0.153846	0.752137	0.0940171	0.204545	0.125	0.611111	0.181818	3.03448	0.103774	117					FAM116A	0.153846	0.752137	0.0940171	FAM116A	0.153846	0.752137	0.0940171									FAM116A	0.204545	0.125	0.611111	FAM116A	0.204545	0.125	0.611111									FAM116A	0.181818	3.03448
KIAA0513	0.290598	0.615385	0.0940171	0.472222	0.152778	0.323529	0.409639	1.6	0.103774	117					KIAA0513	0.290598	0.615385	0.0940171	KIAA0513	0.290598	0.615385	0.0940171									KIAA0513	0.472222	0.152778	0.323529	KIAA0513	0.472222	0.152778	0.323529									KIAA0513	0.409639	1.6
OTOGL	0.188034	0.717949	0.0940171	0.261905	0.130952	0.5	0.231579	2.54545	0.103774	234					OTOGL	0.188034	0.717949	0.0940171	OTOGL	0.188034	0.717949	0.0940171									OTOGL	0.261905	0.130952	0.5	OTOGL	0.261905	0.130952	0.5									OTOGL	0.231579	2.54545
NIPBL_ENST00000448238	0.187943	0.718085	0.0939716	0.261728	0.130864	0.5	0.231441	2.54717	0.103718	564					NIPBL_ENST00000448238	0.187943	0.718085	0.0939716	NIPBL_ENST00000448238	0.187943	0.718085	0.0939716									NIPBL_ENST00000448238	0.261728	0.130864	0.5	NIPBL_ENST00000448238	0.261728	0.130864	0.5									NIPBL_ENST00000448238	0.231441	2.54717
ARHGAP12	0.167785	0.738255	0.0939597	0.227273	0.127273	0.56	0.201613	2.82051	0.103704	149					ARHGAP12	0.167785	0.738255	0.0939597	ARHGAP12	0.167785	0.738255	0.0939597									ARHGAP12	0.227273	0.127273	0.56	ARHGAP12	0.227273	0.127273	0.56									ARHGAP12	0.201613	2.82051
ZNF345	0.187919	0.718121	0.0939597	0.261682	0.130841	0.5	0.231405	2.54762	0.103704	149					ZNF345	0.187919	0.718121	0.0939597	ZNF345	0.187919	0.718121	0.0939597									ZNF345	0.261682	0.130841	0.5	ZNF345	0.261682	0.130841	0.5									ZNF345	0.231405	2.54762
EXOC6	0.174497	0.731544	0.0939597	0.238532	0.12844	0.538462	0.211382	2.725	0.103704	149					EXOC6	0.174497	0.731544	0.0939597	EXOC6	0.174497	0.731544	0.0939597									EXOC6	0.238532	0.12844	0.538462	EXOC6	0.238532	0.12844	0.538462									EXOC6	0.211382	2.725
BIRC3	0.0939227	0.812155	0.0939227	0.115646	0.115646	1	0.103659	4.32353	0.103659	181					BIRC3	0.0939227	0.812155	0.0939227					BIRC3	0.0939227	0.812155	0.0939227					BIRC3	0.115646	0.115646	1					BIRC3	0.115646	1	1					BIRC3	0.103659	4.32353
CNTNAP3_ENST00000358144	0.230047	0.676056	0.0938967	0.340278	0.138889	0.408163	0.29878	2.08696	0.103627	213					CNTNAP3_ENST00000358144	0.230047	0.676056	0.0938967	CNTNAP3_ENST00000358144	0.230047	0.676056	0.0938967									CNTNAP3_ENST00000358144	0.340278	0.138889	0.408163	CNTNAP3_ENST00000358144	0.340278	0.138889	0.408163									CNTNAP3_ENST00000358144	0.29878	2.08696
KIAA0528	0.192488	0.713615	0.0938967	0.269737	0.131579	0.487805	0.238372	2.4918	0.103627	213					KIAA0528	0.192488	0.713615	0.0938967	KIAA0528	0.192488	0.713615	0.0938967									KIAA0528	0.269737	0.131579	0.487805	KIAA0528	0.269737	0.131579	0.487805									KIAA0528	0.238372	2.4918
SMARCB1_ENST00000344921	0.126761	0.779343	0.0938967	0.162651	0.120482	0.740741	0.145161	3.53191	0.103627	213					SMARCB1_ENST00000344921	0.126761	0.779343	0.0938967	SMARCB1_ENST00000344921	0.126761	0.779343	0.0938967									SMARCB1_ENST00000344921	0.162651	0.120482	0.740741	SMARCB1_ENST00000344921	0.162651	0.120482	0.740741									SMARCB1_ENST00000344921	0.145161	3.53191
AMOT_ENST00000371958	0.20625	0.7	0.09375	0.294643	0.133929	0.454545	0.259843	2.33333	0.103448	160					AMOT_ENST00000371958	0.20625	0.7	0.09375	AMOT_ENST00000371958	0.20625	0.7	0.09375									AMOT_ENST00000371958	0.294643	0.133929	0.454545	AMOT_ENST00000371958	0.294643	0.133929	0.454545									AMOT_ENST00000371958	0.259843	2.33333
ATF6B	0.28125	0.625	0.09375	0.45	0.15	0.333333	0.391304	1.66667	0.103448	128					ATF6B	0.28125	0.625	0.09375	ATF6B	0.28125	0.625	0.09375									ATF6B	0.45	0.15	0.333333	ATF6B	0.45	0.15	0.333333									ATF6B	0.391304	1.66667
ELP2	0.203125	0.703125	0.09375	0.288889	0.133333	0.461538	0.254902	2.36842	0.103448	128					ELP2	0.203125	0.703125	0.09375	ELP2	0.203125	0.703125	0.09375									ELP2	0.288889	0.133333	0.461538	ELP2	0.288889	0.133333	0.461538									ELP2	0.254902	2.36842
NEK4	0.164062	0.742188	0.09375	0.221053	0.126316	0.571429	0.196262	2.87879	0.103448	128					NEK4	0.164062	0.742188	0.09375	NEK4	0.164062	0.742188	0.09375									NEK4	0.221053	0.126316	0.571429	NEK4	0.221053	0.126316	0.571429									NEK4	0.196262	2.87879
TAF2	0.1875	0.71875	0.09375	0.26087	0.130435	0.5	0.230769	2.55556	0.103448	224					TAF2	0.1875	0.71875	0.09375	TAF2	0.1875	0.71875	0.09375									TAF2	0.26087	0.130435	0.5	TAF2	0.26087	0.130435	0.5									TAF2	0.230769	2.55556
XRN2	0.236607	0.669643	0.09375	0.353333	0.14	0.396226	0.309942	2.02703	0.103448	224					XRN2	0.236607	0.669643	0.09375	XRN2	0.236607	0.669643	0.09375									XRN2	0.353333	0.14	0.396226	XRN2	0.353333	0.14	0.396226									XRN2	0.309942	2.02703
BRCA1	0.107937	0.798413	0.0936508	0.135189	0.117296	0.867647	0.120996	3.96063	0.103327	630					BRCA1	0.107937	0.798413	0.0936508					BRCA1	0.107937	0.798413	0.0936508					BRCA1	0.135189	0.117296	0.867647	BRCA1	0.135189	0.117296	0.867647									BRCA1	0.120996	3.96063
HEG1	0.243446	0.662921	0.093633	0.367232	0.141243	0.384615	0.321782	1.96667	0.103306	267					HEG1	0.243446	0.662921	0.093633	HEG1	0.243446	0.662921	0.093633									HEG1	0.367232	0.141243	0.384615	HEG1	0.367232	0.141243	0.384615									HEG1	0.321782	1.96667
DIP2C_ENST00000381496	0.261084	0.64532	0.0935961	0.40458	0.145038	0.358491	0.353333	1.81944	0.103261	203					DIP2C_ENST00000381496	0.261084	0.64532	0.0935961	DIP2C_ENST00000381496	0.261084	0.64532	0.0935961									DIP2C_ENST00000381496	0.40458	0.145038	0.358491	DIP2C_ENST00000381496	0.40458	0.145038	0.358491									DIP2C_ENST00000381496	0.353333	1.81944
AASDH_ENST00000502617	0.151079	0.755396	0.0935252	0.2	0.12381	0.619048	0.177966	3.08824	0.103175	139					AASDH_ENST00000502617	0.151079	0.755396	0.0935252	AASDH_ENST00000502617	0.151079	0.755396	0.0935252									AASDH_ENST00000502617	0.2	0.12381	0.619048	AASDH_ENST00000502617	0.2	0.12381	0.619048									AASDH_ENST00000502617	0.177966	3.08824
GBA2_ENST00000545786	0.23741	0.669065	0.0935252	0.354839	0.139785	0.393939	0.311321	2.02174	0.103175	139					GBA2_ENST00000545786	0.23741	0.669065	0.0935252	GBA2_ENST00000545786	0.23741	0.669065	0.0935252									GBA2_ENST00000545786	0.354839	0.139785	0.393939	GBA2_ENST00000545786	0.354839	0.139785	0.393939									GBA2_ENST00000545786	0.311321	2.02174
CDK15	0.271028	0.635514	0.0934579	0.426471	0.147059	0.344828	0.371795	1.74359	0.103093	107					CDK15	0.271028	0.635514	0.0934579	CDK15	0.271028	0.635514	0.0934579									CDK15	0.426471	0.147059	0.344828	CDK15	0.426471	0.147059	0.344828									CDK15	0.371795	1.74359
GCNT3	0.280374	0.626168	0.0934579	0.447761	0.149254	0.333333	0.38961	1.675	0.103093	107					GCNT3	0.280374	0.626168	0.0934579	GCNT3	0.280374	0.626168	0.0934579									GCNT3	0.447761	0.149254	0.333333	GCNT3	0.447761	0.149254	0.333333									GCNT3	0.38961	1.675
MACF1_ENST00000317713	0.187898	0.718684	0.0934183	0.261448	0.129985	0.497175	0.231373	2.55472	0.103044	942					MACF1_ENST00000317713	0.187898	0.718684	0.0934183	MACF1_ENST00000317713	0.187898	0.718684	0.0934183									MACF1_ENST00000317713	0.261448	0.129985	0.497175	MACF1_ENST00000317713	0.261448	0.129985	0.497175									MACF1_ENST00000317713	0.231373	2.55472
C6orf103_ENST00000367493	0.133333	0.773333	0.0933333	0.172414	0.12069	0.7	0.153846	3.41176	0.102941	150					C6orf103_ENST00000367493	0.133333	0.773333	0.0933333	C6orf103_ENST00000367493	0.133333	0.773333	0.0933333									C6orf103_ENST00000367493	0.172414	0.12069	0.7	C6orf103_ENST00000367493	0.172414	0.12069	0.7									C6orf103_ENST00000367493	0.153846	3.41176
TMEM67_ENST00000409623	0.253333	0.653333	0.0933333	0.387755	0.142857	0.368421	0.339286	1.88462	0.102941	150					TMEM67_ENST00000409623	0.253333	0.653333	0.0933333	TMEM67_ENST00000409623	0.253333	0.653333	0.0933333									TMEM67_ENST00000409623	0.387755	0.142857	0.368421	TMEM67_ENST00000409623	0.387755	0.142857	0.368421									TMEM67_ENST00000409623	0.339286	1.88462
TSC2_ENST00000219476	0.188022	0.718663	0.0933148	0.261628	0.129845	0.496296	0.231561	2.55446	0.102919	718					TSC2_ENST00000219476	0.188022	0.718663	0.0933148	TSC2_ENST00000219476	0.188022	0.718663	0.0933148									TSC2_ENST00000219476	0.261628	0.129845	0.496296	TSC2_ENST00000219476	0.261628	0.129845	0.496296									TSC2_ENST00000219476	0.231561	2.55446
HEATR5A	0.186567	0.720149	0.0932836	0.259067	0.129534	0.5	0.229358	2.57333	0.102881	268					HEATR5A	0.186567	0.720149	0.0932836	HEATR5A	0.186567	0.720149	0.0932836									HEATR5A	0.259067	0.129534	0.5	HEATR5A	0.259067	0.129534	0.5									HEATR5A	0.229358	2.57333
THRAP3	0.164179	0.742537	0.0932836	0.221106	0.125628	0.568182	0.196429	2.88406	0.102881	268					THRAP3	0.164179	0.742537	0.0932836	THRAP3	0.164179	0.742537	0.0932836									THRAP3	0.221106	0.125628	0.568182	THRAP3	0.221106	0.125628	0.568182									THRAP3	0.196429	2.88406
GSDMC	0.222798	0.683938	0.0932642	0.325758	0.136364	0.418605	0.286667	2.16393	0.102857	193					GSDMC	0.222798	0.683938	0.0932642	GSDMC	0.222798	0.683938	0.0932642									GSDMC	0.325758	0.136364	0.418605	GSDMC	0.325758	0.136364	0.418605									GSDMC	0.286667	2.16393
GABRA2_ENST00000540012	0.177966	0.728814	0.0932203	0.244186	0.127907	0.52381	0.216495	2.6875	0.102804	236					GABRA2_ENST00000540012	0.177966	0.728814	0.0932203	GABRA2_ENST00000540012	0.177966	0.728814	0.0932203									GABRA2_ENST00000540012	0.244186	0.127907	0.52381	GABRA2_ENST00000540012	0.244186	0.127907	0.52381									GABRA2_ENST00000540012	0.216495	2.6875
HSD17B2	0.254237	0.652542	0.0932203	0.38961	0.142857	0.366667	0.340909	1.87805	0.102804	118					HSD17B2	0.254237	0.652542	0.0932203	HSD17B2	0.254237	0.652542	0.0932203									HSD17B2	0.38961	0.142857	0.366667	HSD17B2	0.38961	0.142857	0.366667									HSD17B2	0.340909	1.87805
ABCA5	0.158385	0.748447	0.0931677	0.211618	0.124481	0.588235	0.188192	2.97531	0.10274	322					ABCA5	0.158385	0.748447	0.0931677	ABCA5	0.158385	0.748447	0.0931677									ABCA5	0.211618	0.124481	0.588235	ABCA5	0.211618	0.124481	0.588235									ABCA5	0.188192	2.97531
KIAA0408	0.21118	0.695652	0.0931677	0.303571	0.133929	0.441176	0.267717	2.28571	0.10274	161					KIAA0408	0.21118	0.695652	0.0931677	KIAA0408	0.21118	0.695652	0.0931677									KIAA0408	0.303571	0.133929	0.441176	KIAA0408	0.303571	0.133929	0.441176									KIAA0408	0.267717	2.28571
PTPDC1_ENST00000375360	0.24031	0.666667	0.0930233	0.360465	0.139535	0.387097	0.316327	2	0.102564	129					PTPDC1_ENST00000375360	0.24031	0.666667	0.0930233	PTPDC1_ENST00000375360	0.24031	0.666667	0.0930233									PTPDC1_ENST00000375360	0.360465	0.139535	0.387097	PTPDC1_ENST00000375360	0.360465	0.139535	0.387097									PTPDC1_ENST00000375360	0.316327	2
CNTN1_ENST00000547849	0.297674	0.609302	0.0930233	0.48855	0.152672	0.3125	0.423841	1.55952	0.102564	215					CNTN1_ENST00000547849	0.297674	0.609302	0.0930233	CNTN1_ENST00000547849	0.297674	0.609302	0.0930233									CNTN1_ENST00000547849	0.48855	0.152672	0.3125	CNTN1_ENST00000547849	0.48855	0.152672	0.3125									CNTN1_ENST00000547849	0.423841	1.55952
DHX8	0.213178	0.693798	0.0930233	0.307263	0.134078	0.436364	0.270936	2.26582	0.102564	258					DHX8	0.213178	0.693798	0.0930233	DHX8	0.213178	0.693798	0.0930233									DHX8	0.307263	0.134078	0.436364	DHX8	0.307263	0.134078	0.436364									DHX8	0.270936	2.26582
INPPL1	0.253205	0.653846	0.0929487	0.387255	0.142157	0.367089	0.339056	1.88889	0.102473	312					INPPL1	0.253205	0.653846	0.0929487	INPPL1	0.253205	0.653846	0.0929487									INPPL1	0.387255	0.142157	0.367089	INPPL1	0.387255	0.142157	0.367089									INPPL1	0.339056	1.88889
GPR113	0.213115	0.693989	0.0928962	0.307087	0.133858	0.435897	0.270833	2.26786	0.10241	183					GPR113	0.213115	0.693989	0.0928962	GPR113	0.213115	0.693989	0.0928962									GPR113	0.307087	0.133858	0.435897	GPR113	0.307087	0.133858	0.435897									GPR113	0.270833	2.26786
MAP3K7_ENST00000369329	0.178571	0.728571	0.0928571	0.245098	0.127451	0.52	0.217391	2.68421	0.102362	140					MAP3K7_ENST00000369329	0.178571	0.728571	0.0928571	MAP3K7_ENST00000369329	0.178571	0.728571	0.0928571									MAP3K7_ENST00000369329	0.245098	0.127451	0.52	MAP3K7_ENST00000369329	0.245098	0.127451	0.52									MAP3K7_ENST00000369329	0.217391	2.68421
ZNF238_ENST00000358704	0.35	0.557143	0.0928571	0.628205	0.166667	0.265306	0.538462	1.25806	0.102362	140					ZNF238_ENST00000358704	0.35	0.557143	0.0928571					ZNF238_ENST00000358704	0.35	0.557143	0.0928571					ZNF238_ENST00000358704	0.628205	0.166667	0.265306					ZNF238_ENST00000358704	0.628205	0.265306	0.265306					ZNF238_ENST00000358704	0.538462	1.25806
URGCP_ENST00000453200	0.261603	0.64557	0.092827	0.405229	0.143791	0.354839	0.354286	1.82143	0.102326	237					URGCP_ENST00000453200	0.261603	0.64557	0.092827	URGCP_ENST00000453200	0.261603	0.64557	0.092827									URGCP_ENST00000453200	0.405229	0.143791	0.354839	URGCP_ENST00000453200	0.405229	0.143791	0.354839									URGCP_ENST00000453200	0.354286	1.82143
ZNF98	0.198312	0.708861	0.092827	0.279762	0.130952	0.468085	0.247368	2.43478	0.102326	237					ZNF98	0.198312	0.708861	0.092827	ZNF98	0.198312	0.708861	0.092827									ZNF98	0.279762	0.130952	0.468085	ZNF98	0.279762	0.130952	0.468085									ZNF98	0.247368	2.43478
ZNF451_ENST00000370706	0.195876	0.71134	0.0927835	0.275362	0.130435	0.473684	0.24359	2.46429	0.102273	194					ZNF451_ENST00000370706	0.195876	0.71134	0.0927835	ZNF451_ENST00000370706	0.195876	0.71134	0.0927835									ZNF451_ENST00000370706	0.275362	0.130435	0.473684	ZNF451_ENST00000370706	0.275362	0.130435	0.473684									ZNF451_ENST00000370706	0.24359	2.46429
CFHR5_ENST00000367414	0.201987	0.705298	0.0927152	0.286385	0.131455	0.459016	0.253112	2.39326	0.10219	302					CFHR5_ENST00000367414	0.201987	0.705298	0.0927152	CFHR5_ENST00000367414	0.201987	0.705298	0.0927152									CFHR5_ENST00000367414	0.286385	0.131455	0.459016	CFHR5_ENST00000367414	0.286385	0.131455	0.459016									CFHR5_ENST00000367414	0.253112	2.39326
IL5RA_ENST00000383846	0.138889	0.768519	0.0925926	0.180723	0.120482	0.666667	0.16129	3.32	0.102041	108					IL5RA_ENST00000383846	0.138889	0.768519	0.0925926	IL5RA_ENST00000383846	0.138889	0.768519	0.0925926									IL5RA_ENST00000383846	0.180723	0.120482	0.666667	IL5RA_ENST00000383846	0.180723	0.120482	0.666667									IL5RA_ENST00000383846	0.16129	3.32
OXSR1	0.222222	0.685185	0.0925926	0.324324	0.135135	0.416667	0.285714	2.17647	0.102041	108					OXSR1	0.222222	0.685185	0.0925926	OXSR1	0.222222	0.685185	0.0925926									OXSR1	0.324324	0.135135	0.416667	OXSR1	0.324324	0.135135	0.416667									OXSR1	0.285714	2.17647
PTGFR_ENST00000370758	0.240741	0.666667	0.0925926	0.361111	0.138889	0.384615	0.317073	2	0.102041	162					PTGFR_ENST00000370758	0.240741	0.666667	0.0925926	PTGFR_ENST00000370758	0.240741	0.666667	0.0925926									PTGFR_ENST00000370758	0.361111	0.138889	0.384615	PTGFR_ENST00000370758	0.361111	0.138889	0.384615									PTGFR_ENST00000370758	0.317073	2
UPF2_ENST00000379172	0.212963	0.694444	0.0925926	0.306667	0.133333	0.434783	0.270588	2.27273	0.102041	108					UPF2_ENST00000379172	0.212963	0.694444	0.0925926	UPF2_ENST00000379172	0.212963	0.694444	0.0925926									UPF2_ENST00000379172	0.306667	0.133333	0.434783	UPF2_ENST00000379172	0.306667	0.133333	0.434783									UPF2_ENST00000379172	0.270588	2.27273
ZNF622	0.203704	0.703704	0.0925926	0.289474	0.131579	0.454545	0.255814	2.375	0.102041	108					ZNF622	0.203704	0.703704	0.0925926	ZNF622	0.203704	0.703704	0.0925926									ZNF622	0.289474	0.131579	0.454545	ZNF622	0.289474	0.131579	0.454545									ZNF622	0.255814	2.375
ODF2L	0.12963	0.777778	0.0925926	0.166667	0.119048	0.714286	0.148936	3.5	0.102041	108					ODF2L	0.12963	0.777778	0.0925926	ODF2L	0.12963	0.777778	0.0925926									ODF2L	0.166667	0.119048	0.714286	ODF2L	0.166667	0.119048	0.714286									ODF2L	0.148936	3.5
NPHP3	0.193833	0.713656	0.092511	0.271605	0.12963	0.477273	0.240437	2.49231	0.101942	227					NPHP3	0.193833	0.713656	0.092511	NPHP3	0.193833	0.713656	0.092511									NPHP3	0.271605	0.12963	0.477273	NPHP3	0.271605	0.12963	0.477273									NPHP3	0.240437	2.49231
CWF19L2_ENST00000282251	0.150289	0.757225	0.0924855	0.198473	0.122137	0.615385	0.176871	3.11905	0.101911	173					CWF19L2_ENST00000282251	0.150289	0.757225	0.0924855	CWF19L2_ENST00000282251	0.150289	0.757225	0.0924855									CWF19L2_ENST00000282251	0.198473	0.122137	0.615385	CWF19L2_ENST00000282251	0.198473	0.122137	0.615385									CWF19L2_ENST00000282251	0.176871	3.11905
AGTPBP1_ENST00000376109	0.0840336	0.823529	0.092437	0.102041	0.112245	1.1	0.0917431	4.66667	0.101852	119					AGTPBP1_ENST00000376109	0.0840336	0.823529	0.092437					AGTPBP1_ENST00000376109	0.0840336	0.823529	0.092437					AGTPBP1_ENST00000376109	0.102041	0.112245	1.1					AGTPBP1_ENST00000376109	0.102041	1.1	1.1					AGTPBP1_ENST00000376109	0.0917431	4.66667
DTNB	0.243697	0.663866	0.092437	0.367089	0.139241	0.37931	0.322222	1.975	0.101852	119					DTNB	0.243697	0.663866	0.092437	DTNB	0.243697	0.663866	0.092437									DTNB	0.367089	0.139241	0.37931	DTNB	0.367089	0.139241	0.37931									DTNB	0.322222	1.975
TCP11L2	0.176471	0.731092	0.092437	0.241379	0.126437	0.52381	0.214286	2.71875	0.101852	119					TCP11L2	0.176471	0.731092	0.092437	TCP11L2	0.176471	0.731092	0.092437									TCP11L2	0.241379	0.126437	0.52381	TCP11L2	0.241379	0.126437	0.52381									TCP11L2	0.214286	2.71875
GCM2	0.282609	0.625	0.0923913	0.452174	0.147826	0.326923	0.393939	1.66667	0.101796	184					GCM2	0.282609	0.625	0.0923913	GCM2	0.282609	0.625	0.0923913									GCM2	0.452174	0.147826	0.326923	GCM2	0.452174	0.147826	0.326923									GCM2	0.393939	1.66667
ABCF2_ENST00000222388	0.269231	0.638462	0.0923077	0.421687	0.144578	0.342857	0.368421	1.76596	0.101695	130					ABCF2_ENST00000222388	0.269231	0.638462	0.0923077	ABCF2_ENST00000222388	0.269231	0.638462	0.0923077									ABCF2_ENST00000222388	0.421687	0.144578	0.342857	ABCF2_ENST00000222388	0.421687	0.144578	0.342857									ABCF2_ENST00000222388	0.368421	1.76596
C2orf3	0.138462	0.769231	0.0923077	0.18	0.12	0.666667	0.160714	3.33333	0.101695	130					C2orf3	0.138462	0.769231	0.0923077	C2orf3	0.138462	0.769231	0.0923077									C2orf3	0.18	0.12	0.666667	C2orf3	0.18	0.12	0.666667									C2orf3	0.160714	3.33333
DNAJC11	0.323077	0.584615	0.0923077	0.552632	0.157895	0.285714	0.477273	1.40741	0.101695	130					DNAJC11	0.323077	0.584615	0.0923077					DNAJC11	0.323077	0.584615	0.0923077					DNAJC11	0.552632	0.157895	0.285714	DNAJC11	0.552632	0.157895	0.285714									DNAJC11	0.477273	1.40741
KIAA1407_ENST00000545063	0.215385	0.692308	0.0923077	0.311111	0.133333	0.428571	0.27451	2.25	0.101695	130					KIAA1407_ENST00000545063	0.215385	0.692308	0.0923077	KIAA1407_ENST00000545063	0.215385	0.692308	0.0923077									KIAA1407_ENST00000545063	0.311111	0.133333	0.428571	KIAA1407_ENST00000545063	0.311111	0.133333	0.428571									KIAA1407_ENST00000545063	0.27451	2.25
CENPE	0.174004	0.733753	0.0922432	0.237143	0.125714	0.53012	0.21066	2.75591	0.101617	477					CENPE	0.174004	0.733753	0.0922432	CENPE	0.174004	0.733753	0.0922432									CENPE	0.237143	0.125714	0.53012	CENPE	0.237143	0.125714	0.53012									CENPE	0.21066	2.75591
CD1E_ENST00000434258	0.23301	0.674757	0.092233	0.345324	0.136691	0.395833	0.303797	2.07463	0.101604	206					CD1E_ENST00000434258	0.23301	0.674757	0.092233	CD1E_ENST00000434258	0.23301	0.674757	0.092233									CD1E_ENST00000434258	0.345324	0.136691	0.395833	CD1E_ENST00000434258	0.345324	0.136691	0.395833									CD1E_ENST00000434258	0.303797	2.07463
DHX15	0.165049	0.742718	0.092233	0.222222	0.124183	0.558824	0.197674	2.88679	0.101604	206					DHX15	0.165049	0.742718	0.092233	DHX15	0.165049	0.742718	0.092233									DHX15	0.222222	0.124183	0.558824	DHX15	0.222222	0.124183	0.558824									DHX15	0.197674	2.88679
KIAA1731_ENST00000411936	0.110599	0.797235	0.0921659	0.138728	0.115607	0.833333	0.124352	3.93182	0.101523	217					KIAA1731_ENST00000411936	0.110599	0.797235	0.0921659					KIAA1731_ENST00000411936	0.110599	0.797235	0.0921659					KIAA1731_ENST00000411936	0.138728	0.115607	0.833333	KIAA1731_ENST00000411936	0.138728	0.115607	0.833333									KIAA1731_ENST00000411936	0.124352	3.93182
AKT3_ENST00000336199	0.124424	0.78341	0.0921659	0.158824	0.117647	0.740741	0.142105	3.61702	0.101523	217					AKT3_ENST00000336199	0.124424	0.78341	0.0921659	AKT3_ENST00000336199	0.124424	0.78341	0.0921659									AKT3_ENST00000336199	0.158824	0.117647	0.740741	AKT3_ENST00000336199	0.158824	0.117647	0.740741									AKT3_ENST00000336199	0.142105	3.61702
C10orf68_ENST00000375025	0.190789	0.717105	0.0921053	0.266055	0.12844	0.482759	0.235772	2.53488	0.101449	152					C10orf68_ENST00000375025	0.190789	0.717105	0.0921053	C10orf68_ENST00000375025	0.190789	0.717105	0.0921053									C10orf68_ENST00000375025	0.266055	0.12844	0.482759	C10orf68_ENST00000375025	0.266055	0.12844	0.482759									C10orf68_ENST00000375025	0.235772	2.53488
FOXJ2	0.184211	0.723684	0.0921053	0.254545	0.127273	0.5	0.225806	2.61905	0.101449	152					FOXJ2	0.184211	0.723684	0.0921053	FOXJ2	0.184211	0.723684	0.0921053									FOXJ2	0.254545	0.127273	0.5	FOXJ2	0.254545	0.127273	0.5									FOXJ2	0.225806	2.61905
ZNF98_ENST00000357774	0.188596	0.719298	0.0921053	0.262195	0.128049	0.488372	0.232432	2.5625	0.101449	228					ZNF98_ENST00000357774	0.188596	0.719298	0.0921053	ZNF98_ENST00000357774	0.188596	0.719298	0.0921053									ZNF98_ENST00000357774	0.262195	0.128049	0.488372	ZNF98_ENST00000357774	0.262195	0.128049	0.488372									ZNF98_ENST00000357774	0.232432	2.5625
AKT3_ENST00000366539	0.131579	0.776316	0.0921053	0.169492	0.118644	0.7	0.151515	3.47059	0.101449	228					AKT3_ENST00000366539	0.131579	0.776316	0.0921053	AKT3_ENST00000366539	0.131579	0.776316	0.0921053									AKT3_ENST00000366539	0.169492	0.118644	0.7	AKT3_ENST00000366539	0.169492	0.118644	0.7									AKT3_ENST00000366539	0.151515	3.47059
ZFHX3	0.245332	0.662589	0.0920798	0.370262	0.13897	0.375328	0.325085	1.96374	0.101418	1553					ZFHX3	0.245332	0.662589	0.0920798	ZFHX3	0.245332	0.662589	0.0920798									ZFHX3	0.370262	0.13897	0.375328	ZFHX3	0.370262	0.13897	0.375328									ZFHX3	0.325085	1.96374
C10orf68	0.184049	0.723926	0.0920245	0.254237	0.127119	0.5	0.225564	2.62222	0.101351	163					C10orf68	0.184049	0.723926	0.0920245	C10orf68	0.184049	0.723926	0.0920245									C10orf68	0.254237	0.127119	0.5	C10orf68	0.254237	0.127119	0.5									C10orf68	0.225564	2.62222
SEC14L1_ENST00000392476	0.233129	0.674847	0.0920245	0.345455	0.136364	0.394737	0.304	2.07547	0.101351	163					SEC14L1_ENST00000392476	0.233129	0.674847	0.0920245	SEC14L1_ENST00000392476	0.233129	0.674847	0.0920245									SEC14L1_ENST00000392476	0.345455	0.136364	0.394737	SEC14L1_ENST00000392476	0.345455	0.136364	0.394737									SEC14L1_ENST00000392476	0.304	2.07547
DPP10_ENST00000393147	0.229885	0.678161	0.091954	0.338983	0.135593	0.4	0.298507	2.10714	0.101266	174					DPP10_ENST00000393147	0.229885	0.678161	0.091954	DPP10_ENST00000393147	0.229885	0.678161	0.091954									DPP10_ENST00000393147	0.338983	0.135593	0.4	DPP10_ENST00000393147	0.338983	0.135593	0.4									DPP10_ENST00000393147	0.298507	2.10714
ZMAT1_ENST00000372782	0.247126	0.66092	0.091954	0.373913	0.13913	0.372093	0.328244	1.94915	0.101266	174					ZMAT1_ENST00000372782	0.247126	0.66092	0.091954	ZMAT1_ENST00000372782	0.247126	0.66092	0.091954									ZMAT1_ENST00000372782	0.373913	0.13913	0.372093	ZMAT1_ENST00000372782	0.373913	0.13913	0.372093									ZMAT1_ENST00000372782	0.328244	1.94915
PRPF40A_ENST00000359961	0.218391	0.689655	0.091954	0.316667	0.133333	0.421053	0.279412	2.22222	0.101266	174					PRPF40A_ENST00000359961	0.218391	0.689655	0.091954	PRPF40A_ENST00000359961	0.218391	0.689655	0.091954									PRPF40A_ENST00000359961	0.316667	0.133333	0.421053	PRPF40A_ENST00000359961	0.316667	0.133333	0.421053									PRPF40A_ENST00000359961	0.279412	2.22222
WDHD1	0.135135	0.772973	0.0918919	0.174825	0.118881	0.68	0.15625	3.40476	0.10119	185					WDHD1	0.135135	0.772973	0.0918919	WDHD1	0.135135	0.772973	0.0918919									WDHD1	0.174825	0.118881	0.68	WDHD1	0.174825	0.118881	0.68									WDHD1	0.15625	3.40476
NAA11	0.284404	0.623853	0.0917431	0.455882	0.147059	0.322581	0.397436	1.65854	0.10101	109					NAA11	0.284404	0.623853	0.0917431	NAA11	0.284404	0.623853	0.0917431									NAA11	0.455882	0.147059	0.322581	NAA11	0.455882	0.147059	0.322581									NAA11	0.397436	1.65854
PNMA2	0.266055	0.642202	0.0917431	0.414286	0.142857	0.344828	0.3625	1.79487	0.10101	109					PNMA2	0.266055	0.642202	0.0917431	PNMA2	0.266055	0.642202	0.0917431									PNMA2	0.414286	0.142857	0.344828	PNMA2	0.414286	0.142857	0.344828									PNMA2	0.3625	1.79487
ABCF2	0.291667	0.616667	0.0916667	0.472973	0.148649	0.314286	0.411765	1.6087	0.100917	120					ABCF2	0.291667	0.616667	0.0916667	ABCF2	0.291667	0.616667	0.0916667									ABCF2	0.472973	0.148649	0.314286	ABCF2	0.472973	0.148649	0.314286									ABCF2	0.411765	1.6087
NEK10_ENST00000341435	0.191667	0.716667	0.0916667	0.267442	0.127907	0.478261	0.237113	2.52941	0.100917	120					NEK10_ENST00000341435	0.191667	0.716667	0.0916667	NEK10_ENST00000341435	0.191667	0.716667	0.0916667									NEK10_ENST00000341435	0.267442	0.127907	0.478261	NEK10_ENST00000341435	0.267442	0.127907	0.478261									NEK10_ENST00000341435	0.237113	2.52941
CD86	0.198473	0.709924	0.0916031	0.27957	0.129032	0.461538	0.247619	2.44737	0.10084	131					CD86	0.198473	0.709924	0.0916031	CD86	0.198473	0.709924	0.0916031									CD86	0.27957	0.129032	0.461538	CD86	0.27957	0.129032	0.461538									CD86	0.247619	2.44737
EPB41L3_ENST00000544123	0.229008	0.679389	0.0916031	0.337079	0.134831	0.4	0.29703	2.11905	0.10084	393					EPB41L3_ENST00000544123	0.229008	0.679389	0.0916031	EPB41L3_ENST00000544123	0.229008	0.679389	0.0916031									EPB41L3_ENST00000544123	0.337079	0.134831	0.4	EPB41L3_ENST00000544123	0.337079	0.134831	0.4									EPB41L3_ENST00000544123	0.29703	2.11905
JMJD4	0.19084	0.717557	0.0916031	0.265957	0.12766	0.48	0.235849	2.54054	0.10084	131					JMJD4	0.19084	0.717557	0.0916031	JMJD4	0.19084	0.717557	0.0916031									JMJD4	0.265957	0.12766	0.48	JMJD4	0.265957	0.12766	0.48									JMJD4	0.235849	2.54054
SHQ1	0.0985915	0.809859	0.0915493	0.121739	0.113043	0.928571	0.109375	4.25926	0.100775	142					SHQ1	0.0985915	0.809859	0.0915493					SHQ1	0.0985915	0.809859	0.0915493					SHQ1	0.121739	0.113043	0.928571	SHQ1	0.121739	0.113043	0.928571									SHQ1	0.109375	4.25926
ZNF570	0.190141	0.71831	0.0915493	0.264706	0.127451	0.481481	0.234783	2.55	0.100775	142					ZNF570	0.190141	0.71831	0.0915493	ZNF570	0.190141	0.71831	0.0915493									ZNF570	0.264706	0.127451	0.481481	ZNF570	0.264706	0.127451	0.481481									ZNF570	0.234783	2.55
MBD1_ENST00000457839	0.20915	0.699346	0.0915033	0.299065	0.130841	0.4375	0.264463	2.32609	0.100719	153					MBD1_ENST00000457839	0.20915	0.699346	0.0915033	MBD1_ENST00000457839	0.20915	0.699346	0.0915033									MBD1_ENST00000457839	0.299065	0.130841	0.4375	MBD1_ENST00000457839	0.299065	0.130841	0.4375									MBD1_ENST00000457839	0.264463	2.32609
CDC5L	0.267974	0.640523	0.0915033	0.418367	0.142857	0.341463	0.366071	1.78182	0.100719	153					CDC5L	0.267974	0.640523	0.0915033	CDC5L	0.267974	0.640523	0.0915033									CDC5L	0.418367	0.142857	0.341463	CDC5L	0.418367	0.142857	0.341463									CDC5L	0.366071	1.78182
PRIM2	0.189542	0.718954	0.0915033	0.263636	0.127273	0.482759	0.233871	2.55814	0.100719	153					PRIM2	0.189542	0.718954	0.0915033	PRIM2	0.189542	0.718954	0.0915033									PRIM2	0.263636	0.127273	0.482759	PRIM2	0.263636	0.127273	0.482759									PRIM2	0.233871	2.55814
TAX1BP1	0.195122	0.713415	0.0914634	0.273504	0.128205	0.46875	0.242424	2.48936	0.100671	164					TAX1BP1	0.195122	0.713415	0.0914634	TAX1BP1	0.195122	0.713415	0.0914634									TAX1BP1	0.273504	0.128205	0.46875	TAX1BP1	0.273504	0.128205	0.46875									TAX1BP1	0.242424	2.48936
KIAA1370	0.172589	0.736041	0.0913706	0.234483	0.124138	0.529412	0.208589	2.78846	0.100559	197					KIAA1370	0.172589	0.736041	0.0913706	KIAA1370	0.172589	0.736041	0.0913706									KIAA1370	0.234483	0.124138	0.529412	KIAA1370	0.234483	0.124138	0.529412									KIAA1370	0.208589	2.78846
TRHR	0.245192	0.663462	0.0913462	0.369565	0.137681	0.372549	0.324841	1.97143	0.100529	208					TRHR	0.245192	0.663462	0.0913462	TRHR	0.245192	0.663462	0.0913462									TRHR	0.369565	0.137681	0.372549	TRHR	0.369565	0.137681	0.372549									TRHR	0.324841	1.97143
CHD8	0.166667	0.742063	0.0912698	0.224599	0.122995	0.547619	0.2	2.87692	0.100437	504					CHD8	0.166667	0.742063	0.0912698	CHD8	0.166667	0.742063	0.0912698									CHD8	0.224599	0.122995	0.547619	CHD8	0.224599	0.122995	0.547619									CHD8	0.2	2.87692
KIF27	0.18251	0.726236	0.0912548	0.251309	0.125654	0.5	0.223256	2.65278	0.100418	263					KIF27	0.18251	0.726236	0.0912548	KIF27	0.18251	0.726236	0.0912548									KIF27	0.251309	0.125654	0.5	KIF27	0.251309	0.125654	0.5									KIF27	0.223256	2.65278
SPEN	0.168201	0.740586	0.0912134	0.227119	0.123164	0.542289	0.202213	2.85484	0.100368	1195					SPEN	0.168201	0.740586	0.0912134	SPEN	0.168201	0.740586	0.0912134									SPEN	0.227119	0.123164	0.542289	SPEN	0.227119	0.123164	0.542289									SPEN	0.202213	2.85484
TBX19	0.371212	0.537879	0.0909091	0.690141	0.169014	0.244898	0.590361	1.16393	0.1	132					TBX19	0.371212	0.537879	0.0909091					TBX19	0.371212	0.537879	0.0909091					TBX19	0.690141	0.169014	0.244898					TBX19	0.690141	0.244898	0.244898					TBX19	0.590361	1.16393
TCF12	0.0779221	0.831169	0.0909091	0.09375	0.109375	1.16667	0.084507	4.92308	0.1	154					TCF12	0.0779221	0.831169	0.0909091					TCF12	0.0779221	0.831169	0.0909091					TCF12	0.09375	0.109375	1.16667					TCF12	0.09375	1.16667	1.16667					TCF12	0.084507	4.92308
CHEK2	0.0743802	0.834711	0.0909091	0.0891089	0.108911	1.22222	0.0803571	5.05	0.1	242					CHEK2	0.0743802	0.834711	0.0909091					CHEK2	0.0743802	0.834711	0.0909091					CHEK2	0.0891089	0.108911	1.22222					CHEK2	0.0891089	1.22222	1.22222					CHEK2	0.0803571	5.05
ABL2_ENST00000512653	0.284585	0.624506	0.0909091	0.455696	0.14557	0.319444	0.39779	1.66316	0.1	253					ABL2_ENST00000512653	0.284585	0.624506	0.0909091	ABL2_ENST00000512653	0.284585	0.624506	0.0909091									ABL2_ENST00000512653	0.455696	0.14557	0.319444	ABL2_ENST00000512653	0.455696	0.14557	0.319444									ABL2_ENST00000512653	0.39779	1.66316
ANK3_ENST00000355288	0.208333	0.700758	0.0909091	0.297297	0.12973	0.436364	0.263158	2.34177	0.1	264					ANK3_ENST00000355288	0.208333	0.700758	0.0909091	ANK3_ENST00000355288	0.208333	0.700758	0.0909091									ANK3_ENST00000355288	0.297297	0.12973	0.436364	ANK3_ENST00000355288	0.297297	0.12973	0.436364									ANK3_ENST00000355288	0.263158	2.34177
CLINT1	0.209091	0.7	0.0909091	0.298701	0.12987	0.434783	0.264368	2.33333	0.1	110					CLINT1	0.209091	0.7	0.0909091	CLINT1	0.209091	0.7	0.0909091									CLINT1	0.298701	0.12987	0.434783	CLINT1	0.298701	0.12987	0.434783									CLINT1	0.264368	2.33333
CUL4B_ENST00000371322	0.142045	0.767045	0.0909091	0.185185	0.118519	0.64	0.165563	3.29268	0.1	176					CUL4B_ENST00000371322	0.142045	0.767045	0.0909091	CUL4B_ENST00000371322	0.142045	0.767045	0.0909091									CUL4B_ENST00000371322	0.185185	0.118519	0.64	CUL4B_ENST00000371322	0.185185	0.118519	0.64									CUL4B_ENST00000371322	0.165563	3.29268
ENPP1	0.229665	0.679426	0.0909091	0.338028	0.133803	0.395833	0.298137	2.1194	0.1	209					ENPP1	0.229665	0.679426	0.0909091	ENPP1	0.229665	0.679426	0.0909091									ENPP1	0.338028	0.133803	0.395833	ENPP1	0.338028	0.133803	0.395833									ENPP1	0.298137	2.1194
GPHN_ENST00000478722	0.160428	0.748663	0.0909091	0.214286	0.121429	0.566667	0.191083	2.97872	0.1	187					GPHN_ENST00000478722	0.160428	0.748663	0.0909091	GPHN_ENST00000478722	0.160428	0.748663	0.0909091									GPHN_ENST00000478722	0.214286	0.121429	0.566667	GPHN_ENST00000478722	0.214286	0.121429	0.566667									GPHN_ENST00000478722	0.191083	2.97872
HSP90B1	0.214286	0.694805	0.0909091	0.308411	0.130841	0.424242	0.272727	2.2766	0.1	154					HSP90B1	0.214286	0.694805	0.0909091	HSP90B1	0.214286	0.694805	0.0909091									HSP90B1	0.308411	0.130841	0.424242	HSP90B1	0.308411	0.130841	0.424242									HSP90B1	0.272727	2.2766
LARP1B	0.187166	0.721925	0.0909091	0.259259	0.125926	0.485714	0.230263	2.59615	0.1	187					LARP1B	0.187166	0.721925	0.0909091	LARP1B	0.187166	0.721925	0.0909091									LARP1B	0.259259	0.125926	0.485714	LARP1B	0.259259	0.125926	0.485714									LARP1B	0.230263	2.59615
PHTF2	0.265152	0.643939	0.0909091	0.411765	0.141176	0.342857	0.360825	1.80851	0.1	132					PHTF2	0.265152	0.643939	0.0909091	PHTF2	0.265152	0.643939	0.0909091									PHTF2	0.411765	0.141176	0.342857	PHTF2	0.411765	0.141176	0.342857									PHTF2	0.360825	1.80851
PKD2L2	0.166667	0.742424	0.0909091	0.22449	0.122449	0.545455	0.2	2.88235	0.1	132					PKD2L2	0.166667	0.742424	0.0909091	PKD2L2	0.166667	0.742424	0.0909091									PKD2L2	0.22449	0.122449	0.545455	PKD2L2	0.22449	0.122449	0.545455									PKD2L2	0.2	2.88235
PTPDC1	0.25974	0.649351	0.0909091	0.4	0.14	0.35	0.350877	1.85185	0.1	154					PTPDC1	0.25974	0.649351	0.0909091	PTPDC1	0.25974	0.649351	0.0909091									PTPDC1	0.4	0.14	0.35	PTPDC1	0.4	0.14	0.35									PTPDC1	0.350877	1.85185
RACGAP1	0.290909	0.618182	0.0909091	0.470588	0.147059	0.3125	0.410256	1.61905	0.1	110					RACGAP1	0.290909	0.618182	0.0909091	RACGAP1	0.290909	0.618182	0.0909091									RACGAP1	0.470588	0.147059	0.3125	RACGAP1	0.470588	0.147059	0.3125									RACGAP1	0.410256	1.61905
RB1CC1	0.176136	0.732955	0.0909091	0.24031	0.124031	0.516129	0.213793	2.74468	0.1	352					RB1CC1	0.176136	0.732955	0.0909091	RB1CC1	0.176136	0.732955	0.0909091									RB1CC1	0.24031	0.124031	0.516129	RB1CC1	0.24031	0.124031	0.516129									RB1CC1	0.213793	2.74468
RUFY3_ENST00000381006	0.239669	0.669421	0.0909091	0.358025	0.135802	0.37931	0.315217	2.025	0.1	121					RUFY3_ENST00000381006	0.239669	0.669421	0.0909091	RUFY3_ENST00000381006	0.239669	0.669421	0.0909091									RUFY3_ENST00000381006	0.358025	0.135802	0.37931	RUFY3_ENST00000381006	0.358025	0.135802	0.37931									RUFY3_ENST00000381006	0.315217	2.025
SELL_ENST00000236147	0.31405	0.595041	0.0909091	0.527778	0.152778	0.289474	0.457831	1.46939	0.1	121					SELL_ENST00000236147	0.31405	0.595041	0.0909091					SELL_ENST00000236147	0.31405	0.595041	0.0909091					SELL_ENST00000236147	0.527778	0.152778	0.289474	SELL_ENST00000236147	0.527778	0.152778	0.289474									SELL_ENST00000236147	0.457831	1.46939
TTC14	0.2	0.709091	0.0909091	0.282051	0.128205	0.454545	0.25	2.4375	0.1	165					TTC14	0.2	0.709091	0.0909091	TTC14	0.2	0.709091	0.0909091									TTC14	0.282051	0.128205	0.454545	TTC14	0.282051	0.128205	0.454545									TTC14	0.25	2.4375
TTC25	0.263636	0.645455	0.0909091	0.408451	0.140845	0.344828	0.358025	1.82051	0.1	110					TTC25	0.263636	0.645455	0.0909091	TTC25	0.263636	0.645455	0.0909091									TTC25	0.408451	0.140845	0.344828	TTC25	0.408451	0.140845	0.344828									TTC25	0.358025	1.82051
TTC39B	0.272727	0.636364	0.0909091	0.428571	0.142857	0.333333	0.375	1.75	0.1	110					TTC39B	0.272727	0.636364	0.0909091	TTC39B	0.272727	0.636364	0.0909091									TTC39B	0.428571	0.142857	0.333333	TTC39B	0.428571	0.142857	0.333333									TTC39B	0.375	1.75
TTC39B_ENST00000512701	0.254545	0.654545	0.0909091	0.388889	0.138889	0.357143	0.341463	1.89474	0.1	110					TTC39B_ENST00000512701	0.254545	0.654545	0.0909091	TTC39B_ENST00000512701	0.254545	0.654545	0.0909091									TTC39B_ENST00000512701	0.388889	0.138889	0.357143	TTC39B_ENST00000512701	0.388889	0.138889	0.357143									TTC39B_ENST00000512701	0.341463	1.89474
PABPC5	0.217172	0.691919	0.0909091	0.313869	0.131387	0.418605	0.277419	2.2459	0.1	198					PABPC5	0.217172	0.691919	0.0909091	PABPC5	0.217172	0.691919	0.0909091									PABPC5	0.313869	0.131387	0.418605	PABPC5	0.313869	0.131387	0.418605									PABPC5	0.277419	2.2459
CR1_ENST00000367049	0.186792	0.722642	0.090566	0.258486	0.125326	0.484848	0.229698	2.60544	0.0995851	530					CR1_ENST00000367049	0.186792	0.722642	0.090566	CR1_ENST00000367049	0.186792	0.722642	0.090566									CR1_ENST00000367049	0.258486	0.125326	0.484848	CR1_ENST00000367049	0.258486	0.125326	0.484848									CR1_ENST00000367049	0.229698	2.60544
XKR6	0.308642	0.600823	0.090535	0.513699	0.150685	0.293333	0.446429	1.50515	0.0995475	243					XKR6	0.308642	0.600823	0.090535	XKR6	0.308642	0.600823	0.090535									XKR6	0.513699	0.150685	0.293333	XKR6	0.513699	0.150685	0.293333									XKR6	0.446429	1.50515
ZC3H18	0.257919	0.651584	0.0904977	0.395833	0.138889	0.350877	0.347561	1.87013	0.0995025	221					ZC3H18	0.257919	0.651584	0.0904977	ZC3H18	0.257919	0.651584	0.0904977									ZC3H18	0.395833	0.138889	0.350877	ZC3H18	0.395833	0.138889	0.350877									ZC3H18	0.347561	1.87013
PRB2	0.161905	0.747619	0.0904762	0.216561	0.121019	0.558824	0.193182	2.96226	0.0994764	210					PRB2	0.161905	0.747619	0.0904762	PRB2	0.161905	0.747619	0.0904762									PRB2	0.216561	0.121019	0.558824	PRB2	0.216561	0.121019	0.558824									PRB2	0.193182	2.96226
MARK2	0.219048	0.690476	0.0904762	0.317241	0.131034	0.413043	0.280488	2.23077	0.0994764	210					MARK2	0.219048	0.690476	0.0904762	MARK2	0.219048	0.690476	0.0904762									MARK2	0.317241	0.131034	0.413043	MARK2	0.317241	0.131034	0.413043									MARK2	0.280488	2.23077
C18orf34_ENST00000383096	0.144578	0.76506	0.0903614	0.188976	0.11811	0.625	0.169014	3.25641	0.0993377	332					C18orf34_ENST00000383096	0.144578	0.76506	0.0903614	C18orf34_ENST00000383096	0.144578	0.76506	0.0903614									C18orf34_ENST00000383096	0.188976	0.11811	0.625	C18orf34_ENST00000383096	0.188976	0.11811	0.625									C18orf34_ENST00000383096	0.169014	3.25641
ARHGAP6_ENST00000534860	0.228916	0.680723	0.0903614	0.336283	0.132743	0.394737	0.296875	2.13208	0.0993377	166					ARHGAP6_ENST00000534860	0.228916	0.680723	0.0903614	ARHGAP6_ENST00000534860	0.228916	0.680723	0.0903614									ARHGAP6_ENST00000534860	0.336283	0.132743	0.394737	ARHGAP6_ENST00000534860	0.336283	0.132743	0.394737									ARHGAP6_ENST00000534860	0.296875	2.13208
PTPN12	0.16129	0.748387	0.0903226	0.215517	0.12069	0.56	0.192308	2.97436	0.0992908	155					PTPN12	0.16129	0.748387	0.0903226	PTPN12	0.16129	0.748387	0.0903226									PTPN12	0.215517	0.12069	0.56	PTPN12	0.215517	0.12069	0.56									PTPN12	0.192308	2.97436
RIMS2_ENST00000402998	0.220736	0.688963	0.090301	0.320388	0.131068	0.409091	0.283262	2.21505	0.0992647	598					RIMS2_ENST00000402998	0.220736	0.688963	0.090301	RIMS2_ENST00000402998	0.220736	0.688963	0.090301									RIMS2_ENST00000402998	0.320388	0.131068	0.409091	RIMS2_ENST00000402998	0.320388	0.131068	0.409091									RIMS2_ENST00000402998	0.283262	2.21505
SDCCAG8	0.145833	0.763889	0.0902778	0.190909	0.118182	0.619048	0.170732	3.23529	0.0992366	144					SDCCAG8	0.145833	0.763889	0.0902778	SDCCAG8	0.145833	0.763889	0.0902778									SDCCAG8	0.190909	0.118182	0.619048	SDCCAG8	0.190909	0.118182	0.619048									SDCCAG8	0.170732	3.23529
CSTF1	0.195489	0.714286	0.0902256	0.273684	0.126316	0.461538	0.242991	2.5	0.0991736	133					CSTF1	0.195489	0.714286	0.0902256	CSTF1	0.195489	0.714286	0.0902256									CSTF1	0.273684	0.126316	0.461538	CSTF1	0.273684	0.126316	0.461538									CSTF1	0.242991	2.5
KLHL9	0.180451	0.729323	0.0902256	0.247423	0.123711	0.5	0.220183	2.69444	0.0991736	133					KLHL9	0.180451	0.729323	0.0902256	KLHL9	0.180451	0.729323	0.0902256					KLHL9	0.247423	0.123711	0.5					KLHL9	0.247423	0.123711	0.5									KLHL9	0.220183	2.69444
FUT8_ENST00000360689	0.180328	0.729508	0.0901639	0.247191	0.123596	0.5	0.22	2.69697	0.0990991	122					FUT8_ENST00000360689	0.180328	0.729508	0.0901639	FUT8_ENST00000360689	0.180328	0.729508	0.0901639					FUT8_ENST00000360689	0.247191	0.123596	0.5					FUT8_ENST00000360689	0.247191	0.123596	0.5									FUT8_ENST00000360689	0.22	2.69697
WAS	0.188525	0.721311	0.0901639	0.261364	0.125	0.478261	0.232323	2.58824	0.0990991	122					WAS	0.188525	0.721311	0.0901639	WAS	0.188525	0.721311	0.0901639									WAS	0.261364	0.125	0.478261	WAS	0.261364	0.125	0.478261									WAS	0.232323	2.58824
DNMT3A_ENST00000380746	0.120141	0.789753	0.090106	0.152125	0.114094	0.75	0.136546	3.7563	0.0990291	566					DNMT3A_ENST00000380746	0.120141	0.789753	0.090106	DNMT3A_ENST00000380746	0.120141	0.789753	0.090106									DNMT3A_ENST00000380746	0.152125	0.114094	0.75	DNMT3A_ENST00000380746	0.152125	0.114094	0.75									DNMT3A_ENST00000380746	0.136546	3.7563
C19orf26	0.198198	0.711712	0.0900901	0.278481	0.126582	0.454545	0.247191	2.46875	0.0990099	111					C19orf26	0.198198	0.711712	0.0900901	C19orf26	0.198198	0.711712	0.0900901									C19orf26	0.278481	0.126582	0.454545	C19orf26	0.278481	0.126582	0.454545									C19orf26	0.247191	2.46875
KHSRP	0.279279	0.630631	0.0900901	0.442857	0.142857	0.322581	0.3875	1.70732	0.0990099	111					KHSRP	0.279279	0.630631	0.0900901	KHSRP	0.279279	0.630631	0.0900901									KHSRP	0.442857	0.142857	0.322581	KHSRP	0.442857	0.142857	0.322581									KHSRP	0.3875	1.70732
CCDC18	0.171171	0.738739	0.0900901	0.231707	0.121951	0.526316	0.206522	2.82759	0.0990099	222					CCDC18	0.171171	0.738739	0.0900901	CCDC18	0.171171	0.738739	0.0900901									CCDC18	0.231707	0.121951	0.526316	CCDC18	0.231707	0.121951	0.526316									CCDC18	0.206522	2.82759
ELP2_ENST00000350494	0.189189	0.720721	0.0900901	0.2625	0.125	0.47619	0.233333	2.58065	0.0990099	111					ELP2_ENST00000350494	0.189189	0.720721	0.0900901	ELP2_ENST00000350494	0.189189	0.720721	0.0900901									ELP2_ENST00000350494	0.2625	0.125	0.47619	ELP2_ENST00000350494	0.2625	0.125	0.47619									ELP2_ENST00000350494	0.233333	2.58065
PAPD4	0.225225	0.684685	0.0900901	0.328947	0.131579	0.4	0.290698	2.17143	0.0990099	111					PAPD4	0.225225	0.684685	0.0900901	PAPD4	0.225225	0.684685	0.0900901									PAPD4	0.328947	0.131579	0.4	PAPD4	0.328947	0.131579	0.4									PAPD4	0.290698	2.17143
SF3B4	0.225225	0.684685	0.0900901	0.328947	0.131579	0.4	0.290698	2.17143	0.0990099	111					SF3B4	0.225225	0.684685	0.0900901	SF3B4	0.225225	0.684685	0.0900901									SF3B4	0.328947	0.131579	0.4	SF3B4	0.328947	0.131579	0.4									SF3B4	0.290698	2.17143
EEA1	0.203791	0.706161	0.0900474	0.288591	0.127517	0.44186	0.255952	2.40323	0.0989583	211					EEA1	0.203791	0.706161	0.0900474	EEA1	0.203791	0.706161	0.0900474									EEA1	0.288591	0.127517	0.44186	EEA1	0.288591	0.127517	0.44186									EEA1	0.255952	2.40323
C3orf64	0.22	0.69	0.09	0.318841	0.130435	0.409091	0.282051	2.22581	0.0989011	100					C3orf64	0.22	0.69	0.09	C3orf64	0.22	0.69	0.09									C3orf64	0.318841	0.130435	0.409091	C3orf64	0.318841	0.130435	0.409091									C3orf64	0.282051	2.22581
CEP57	0.16	0.75	0.09	0.213333	0.12	0.5625	0.190476	3	0.0989011	100					CEP57	0.16	0.75	0.09	CEP57	0.16	0.75	0.09									CEP57	0.213333	0.12	0.5625	CEP57	0.213333	0.12	0.5625									CEP57	0.190476	3
UTP18	0.22	0.69	0.09	0.318841	0.130435	0.409091	0.282051	2.22581	0.0989011	100					UTP18	0.22	0.69	0.09	UTP18	0.22	0.69	0.09									UTP18	0.318841	0.130435	0.409091	UTP18	0.318841	0.130435	0.409091									UTP18	0.282051	2.22581
KIAA1804	0.161376	0.748677	0.0899471	0.215548	0.120141	0.557377	0.192429	2.97895	0.0988372	378					KIAA1804	0.161376	0.748677	0.0899471	KIAA1804	0.161376	0.748677	0.0899471									KIAA1804	0.215548	0.120141	0.557377	KIAA1804	0.215548	0.120141	0.557377									KIAA1804	0.192429	2.97895
CCDC144B	0.202247	0.707865	0.0898876	0.285714	0.126984	0.444444	0.253521	2.42308	0.0987654	178					CCDC144B	0.202247	0.707865	0.0898876	CCDC144B	0.202247	0.707865	0.0898876									CCDC144B	0.285714	0.126984	0.444444	CCDC144B	0.285714	0.126984	0.444444									CCDC144B	0.253521	2.42308
ZNF585A	0.224719	0.685393	0.0898876	0.327869	0.131148	0.4	0.289855	2.17857	0.0987654	178					ZNF585A	0.224719	0.685393	0.0898876	ZNF585A	0.224719	0.685393	0.0898876									ZNF585A	0.327869	0.131148	0.4	ZNF585A	0.327869	0.131148	0.4									ZNF585A	0.289855	2.17857
TAB3	0.149701	0.760479	0.0898204	0.19685	0.11811	0.6	0.176056	3.175	0.0986842	167					TAB3	0.149701	0.760479	0.0898204	TAB3	0.149701	0.760479	0.0898204									TAB3	0.19685	0.11811	0.6	TAB3	0.19685	0.11811	0.6									TAB3	0.176056	3.175
LAMB1	0.19202	0.718204	0.0897756	0.267361	0.125	0.467532	0.237654	2.54867	0.0986301	401					LAMB1	0.19202	0.718204	0.0897756	LAMB1	0.19202	0.718204	0.0897756									LAMB1	0.267361	0.125	0.467532	LAMB1	0.267361	0.125	0.467532					LAMB1	0.237654	2.54867	0.0986301
PPFIA2_ENST00000333447	0.147217	0.763016	0.0897666	0.192941	0.117647	0.609756	0.172632	3.2197	0.0986193	557					PPFIA2_ENST00000333447	0.147217	0.763016	0.0897666	PPFIA2_ENST00000333447	0.147217	0.763016	0.0897666									PPFIA2_ENST00000333447	0.192941	0.117647	0.609756	PPFIA2_ENST00000333447	0.192941	0.117647	0.609756									PPFIA2_ENST00000333447	0.172632	3.2197
HAUS6	0.160256	0.75	0.0897436	0.213675	0.119658	0.56	0.19084	3	0.0985915	156					HAUS6	0.160256	0.75	0.0897436	HAUS6	0.160256	0.75	0.0897436									HAUS6	0.213675	0.119658	0.56	HAUS6	0.213675	0.119658	0.56									HAUS6	0.19084	3
MACF1_ENST00000361689	0.186845	0.723546	0.0896092	0.258235	0.123847	0.479592	0.229777	2.61724	0.0984293	1049					MACF1_ENST00000361689	0.186845	0.723546	0.0896092	MACF1_ENST00000361689	0.186845	0.723546	0.0896092					MACF1_ENST00000361689	0.258235	0.123847	0.479592					MACF1_ENST00000361689	0.258235	0.123847	0.479592					MACF1_ENST00000361689	0.229777	2.61724	0.0984293
C2orf63	0.156716	0.753731	0.0895522	0.207921	0.118812	0.571429	0.185841	3.06061	0.0983607	134					C2orf63	0.156716	0.753731	0.0895522	C2orf63	0.156716	0.753731	0.0895522									C2orf63	0.207921	0.118812	0.571429	C2orf63	0.207921	0.118812	0.571429									C2orf63	0.185841	3.06061
C2orf63_ENST00000407122	0.156716	0.753731	0.0895522	0.207921	0.118812	0.571429	0.185841	3.06061	0.0983607	134					C2orf63_ENST00000407122	0.156716	0.753731	0.0895522	C2orf63_ENST00000407122	0.156716	0.753731	0.0895522									C2orf63_ENST00000407122	0.207921	0.118812	0.571429	C2orf63_ENST00000407122	0.207921	0.118812	0.571429									C2orf63_ENST00000407122	0.185841	3.06061
CCDC11	0.201493	0.708955	0.0895522	0.284211	0.126316	0.444444	0.252336	2.4359	0.0983607	134					CCDC11	0.201493	0.708955	0.0895522	CCDC11	0.201493	0.708955	0.0895522									CCDC11	0.284211	0.126316	0.444444	CCDC11	0.284211	0.126316	0.444444					CCDC11	0.252336	2.4359	0.0983607
CPED1	0.278607	0.631841	0.0895522	0.440945	0.141732	0.321429	0.386207	1.71622	0.0983607	201					CPED1	0.278607	0.631841	0.0895522	CPED1	0.278607	0.631841	0.0895522									CPED1	0.440945	0.141732	0.321429	CPED1	0.440945	0.141732	0.321429					CPED1	0.386207	1.71622	0.0983607
GBA2_ENST00000378094	0.223881	0.686567	0.0895522	0.326087	0.130435	0.4	0.288462	2.19048	0.0983607	134					GBA2_ENST00000378094	0.223881	0.686567	0.0895522	GBA2_ENST00000378094	0.223881	0.686567	0.0895522									GBA2_ENST00000378094	0.326087	0.130435	0.4	GBA2_ENST00000378094	0.326087	0.130435	0.4					GBA2_ENST00000378094	0.288462	2.19048	0.0983607
ITGA5	0.227612	0.682836	0.0895522	0.333333	0.131148	0.393443	0.294686	2.15294	0.0983607	268					ITGA5	0.227612	0.682836	0.0895522	ITGA5	0.227612	0.682836	0.0895522									ITGA5	0.333333	0.131148	0.393443	ITGA5	0.333333	0.131148	0.393443					ITGA5	0.294686	2.15294	0.0983607
ENSG00000269541	0.208955	0.701493	0.0895522	0.297872	0.12766	0.428571	0.264151	2.35	0.0983607	134					ENSG00000269541	0.208955	0.701493	0.0895522	ENSG00000269541	0.208955	0.701493	0.0895522									ENSG00000269541	0.297872	0.12766	0.428571	ENSG00000269541	0.297872	0.12766	0.428571					ENSG00000269541	0.264151	2.35	0.0983607
FUT8	0.178862	0.731707	0.0894309	0.244444	0.122222	0.5	0.217822	2.72727	0.0982143	123					FUT8	0.178862	0.731707	0.0894309	FUT8	0.178862	0.731707	0.0894309					FUT8	0.244444	0.122222	0.5					FUT8	0.244444	0.122222	0.5									FUT8	0.217822	2.72727
GUF1	0.252033	0.658537	0.0894309	0.382716	0.135802	0.354839	0.336957	1.92857	0.0982143	123					GUF1	0.252033	0.658537	0.0894309	GUF1	0.252033	0.658537	0.0894309									GUF1	0.382716	0.135802	0.354839	GUF1	0.382716	0.135802	0.354839					GUF1	0.336957	1.92857	0.0982143
NFXL1	0.139665	0.77095	0.0893855	0.181159	0.115942	0.64	0.162338	3.36585	0.0981595	179					NFXL1	0.139665	0.77095	0.0893855	NFXL1	0.139665	0.77095	0.0893855									NFXL1	0.181159	0.115942	0.64	NFXL1	0.181159	0.115942	0.64									NFXL1	0.162338	3.36585
LEPR_ENST00000344610	0.195745	0.714894	0.0893617	0.27381	0.125	0.456522	0.243386	2.50746	0.0981308	235					LEPR_ENST00000344610	0.195745	0.714894	0.0893617	LEPR_ENST00000344610	0.195745	0.714894	0.0893617									LEPR_ENST00000344610	0.27381	0.125	0.456522	LEPR_ENST00000344610	0.27381	0.125	0.456522					LEPR_ENST00000344610	0.243386	2.50746	0.0981308
IQCB1	0.125	0.785714	0.0892857	0.159091	0.113636	0.714286	0.142857	3.66667	0.0980392	112					IQCB1	0.125	0.785714	0.0892857	IQCB1	0.125	0.785714	0.0892857									IQCB1	0.159091	0.113636	0.714286	IQCB1	0.159091	0.113636	0.714286									IQCB1	0.142857	3.66667
KIAA1432_ENST00000381532	0.196429	0.714286	0.0892857	0.275	0.125	0.454545	0.244444	2.5	0.0980392	168					KIAA1432_ENST00000381532	0.196429	0.714286	0.0892857	KIAA1432_ENST00000381532	0.196429	0.714286	0.0892857									KIAA1432_ENST00000381532	0.275	0.125	0.454545	KIAA1432_ENST00000381532	0.275	0.125	0.454545					KIAA1432_ENST00000381532	0.244444	2.5	0.0980392
Q99543-2	0.1875	0.723214	0.0892857	0.259259	0.123457	0.47619	0.230769	2.6129	0.0980392	112					Q99543-2	0.1875	0.723214	0.0892857	Q99543-2	0.1875	0.723214	0.0892857					Q99543-2	0.259259	0.123457	0.47619					Q99543-2	0.259259	0.123457	0.47619					Q99543-2	0.230769	2.6129	0.0980392
RNF217_ENST00000521654	0.196429	0.714286	0.0892857	0.275	0.125	0.454545	0.244444	2.5	0.0980392	112					RNF217_ENST00000521654	0.196429	0.714286	0.0892857	RNF217_ENST00000521654	0.196429	0.714286	0.0892857									RNF217_ENST00000521654	0.275	0.125	0.454545	RNF217_ENST00000521654	0.275	0.125	0.454545					RNF217_ENST00000521654	0.244444	2.5	0.0980392
TRAF3IP1	0.241071	0.669643	0.0892857	0.36	0.133333	0.37037	0.317647	2.02703	0.0980392	112					TRAF3IP1	0.241071	0.669643	0.0892857	TRAF3IP1	0.241071	0.669643	0.0892857									TRAF3IP1	0.36	0.133333	0.37037	TRAF3IP1	0.36	0.133333	0.37037					TRAF3IP1	0.317647	2.02703	0.0980392
ZNF155	0.196429	0.714286	0.0892857	0.275	0.125	0.454545	0.244444	2.5	0.0980392	112					ZNF155	0.196429	0.714286	0.0892857	ZNF155	0.196429	0.714286	0.0892857									ZNF155	0.275	0.125	0.454545	ZNF155	0.275	0.125	0.454545					ZNF155	0.244444	2.5	0.0980392
DENND2C_ENST00000393274	0.205357	0.705357	0.0892857	0.291139	0.126582	0.434783	0.258427	2.39394	0.0980392	224					DENND2C_ENST00000393274	0.205357	0.705357	0.0892857	DENND2C_ENST00000393274	0.205357	0.705357	0.0892857									DENND2C_ENST00000393274	0.291139	0.126582	0.434783	DENND2C_ENST00000393274	0.291139	0.126582	0.434783					DENND2C_ENST00000393274	0.258427	2.39394	0.0980392
FCHO2_ENST00000430046	0.232143	0.678571	0.0892857	0.342105	0.131579	0.384615	0.302326	2.11111	0.0980392	112					FCHO2_ENST00000430046	0.232143	0.678571	0.0892857	FCHO2_ENST00000430046	0.232143	0.678571	0.0892857									FCHO2_ENST00000430046	0.342105	0.131579	0.384615	FCHO2_ENST00000430046	0.342105	0.131579	0.384615					FCHO2_ENST00000430046	0.302326	2.11111	0.0980392
VCP	0.229299	0.681529	0.089172	0.336449	0.130841	0.388889	0.297521	2.14	0.0979021	157					VCP	0.229299	0.681529	0.089172	VCP	0.229299	0.681529	0.089172									VCP	0.336449	0.130841	0.388889	VCP	0.336449	0.130841	0.388889					VCP	0.297521	2.14	0.0979021
KRT26	0.146497	0.764331	0.089172	0.191667	0.116667	0.608696	0.171642	3.24324	0.0979021	157					KRT26	0.146497	0.764331	0.089172	KRT26	0.146497	0.764331	0.089172									KRT26	0.191667	0.116667	0.608696	KRT26	0.191667	0.116667	0.608696									KRT26	0.171642	3.24324
GAS7_ENST00000580865	0.207921	0.70297	0.0891089	0.295775	0.126761	0.428571	0.2625	2.36667	0.0978261	101					GAS7_ENST00000580865	0.207921	0.70297	0.0891089	GAS7_ENST00000580865	0.207921	0.70297	0.0891089									GAS7_ENST00000580865	0.295775	0.126761	0.428571	GAS7_ENST00000580865	0.295775	0.126761	0.428571					GAS7_ENST00000580865	0.2625	2.36667	0.0978261
KIAA1598_ENST00000392903	0.168317	0.742574	0.0891089	0.226667	0.12	0.529412	0.202381	2.88462	0.0978261	101					KIAA1598_ENST00000392903	0.168317	0.742574	0.0891089	KIAA1598_ENST00000392903	0.168317	0.742574	0.0891089									KIAA1598_ENST00000392903	0.226667	0.12	0.529412	KIAA1598_ENST00000392903	0.226667	0.12	0.529412									KIAA1598_ENST00000392903	0.202381	2.88462
QKI	0.19802	0.712871	0.0891089	0.277778	0.125	0.45	0.246914	2.48276	0.0978261	101					QKI	0.19802	0.712871	0.0891089	QKI	0.19802	0.712871	0.0891089									QKI	0.277778	0.125	0.45	QKI	0.277778	0.125	0.45					QKI	0.246914	2.48276	0.0978261
DMKN_ENST00000429837	0.257426	0.653465	0.0891089	0.393939	0.136364	0.346154	0.346667	1.88571	0.0978261	101					DMKN_ENST00000429837	0.257426	0.653465	0.0891089	DMKN_ENST00000429837	0.257426	0.653465	0.0891089									DMKN_ENST00000429837	0.393939	0.136364	0.346154	DMKN_ENST00000429837	0.393939	0.136364	0.346154					DMKN_ENST00000429837	0.346667	1.88571	0.0978261
GFI1	0.237624	0.673267	0.0891089	0.352941	0.132353	0.375	0.311688	2.06061	0.0978261	101					GFI1	0.237624	0.673267	0.0891089	GFI1	0.237624	0.673267	0.0891089									GFI1	0.352941	0.132353	0.375	GFI1	0.352941	0.132353	0.375					GFI1	0.311688	2.06061	0.0978261
CES2	0.30137	0.609589	0.0890411	0.494382	0.146067	0.295455	0.431373	1.5614	0.0977444	146					CES2	0.30137	0.609589	0.0890411	CES2	0.30137	0.609589	0.0890411									CES2	0.494382	0.146067	0.295455	CES2	0.494382	0.146067	0.295455					CES2	0.431373	1.5614	0.0977444
FGF13_ENST00000370603	0.239726	0.671233	0.0890411	0.357143	0.132653	0.371429	0.315315	2.04167	0.0977444	146					FGF13_ENST00000370603	0.239726	0.671233	0.0890411	FGF13_ENST00000370603	0.239726	0.671233	0.0890411									FGF13_ENST00000370603	0.357143	0.132653	0.371429	FGF13_ENST00000370603	0.357143	0.132653	0.371429					FGF13_ENST00000370603	0.315315	2.04167	0.0977444
HNRNPUL2	0.19863	0.712329	0.0890411	0.278846	0.125	0.448276	0.247863	2.47619	0.0977444	146					HNRNPUL2	0.19863	0.712329	0.0890411	HNRNPUL2	0.19863	0.712329	0.0890411									HNRNPUL2	0.278846	0.125	0.448276	HNRNPUL2	0.278846	0.125	0.448276					HNRNPUL2	0.247863	2.47619	0.0977444
TMEM131_ENST00000186436	0.192878	0.718101	0.0890208	0.268595	0.123967	0.461538	0.238971	2.54737	0.0977199	337					TMEM131_ENST00000186436	0.192878	0.718101	0.0890208	TMEM131_ENST00000186436	0.192878	0.718101	0.0890208									TMEM131_ENST00000186436	0.268595	0.123967	0.461538	TMEM131_ENST00000186436	0.268595	0.123967	0.461538					TMEM131_ENST00000186436	0.238971	2.54737	0.0977199
TCF20_ENST00000335626	0.167539	0.743455	0.0890052	0.225352	0.119718	0.53125	0.201258	2.89796	0.0977011	191					TCF20_ENST00000335626	0.167539	0.743455	0.0890052	TCF20_ENST00000335626	0.167539	0.743455	0.0890052									TCF20_ENST00000335626	0.225352	0.119718	0.53125	TCF20_ENST00000335626	0.225352	0.119718	0.53125									TCF20_ENST00000335626	0.201258	2.89796
AKT3	0.131356	0.779661	0.0889831	0.168478	0.11413	0.677419	0.15122	3.53846	0.0976744	236					AKT3	0.131356	0.779661	0.0889831	AKT3	0.131356	0.779661	0.0889831									AKT3	0.168478	0.11413	0.677419	AKT3	0.168478	0.11413	0.677419									AKT3	0.15122	3.53846
BBS9_ENST00000354265	0.208889	0.702222	0.0888889	0.297468	0.126582	0.425532	0.264045	2.35821	0.097561	225					BBS9_ENST00000354265	0.208889	0.702222	0.0888889	BBS9_ENST00000354265	0.208889	0.702222	0.0888889									BBS9_ENST00000354265	0.297468	0.126582	0.425532	BBS9_ENST00000354265	0.297468	0.126582	0.425532					BBS9_ENST00000354265	0.264045	2.35821	0.097561
PGM5	0.142222	0.768889	0.0888889	0.184971	0.115607	0.625	0.165803	3.32692	0.097561	225					PGM5	0.142222	0.768889	0.0888889	PGM5	0.142222	0.768889	0.0888889									PGM5	0.184971	0.115607	0.625	PGM5	0.184971	0.115607	0.625									PGM5	0.165803	3.32692
TEX11_ENST00000395889	0.255556	0.655556	0.0888889	0.389831	0.135593	0.347826	0.343284	1.90323	0.097561	180					TEX11_ENST00000395889	0.255556	0.655556	0.0888889	TEX11_ENST00000395889	0.255556	0.655556	0.0888889									TEX11_ENST00000395889	0.389831	0.135593	0.347826	TEX11_ENST00000395889	0.389831	0.135593	0.347826					TEX11_ENST00000395889	0.343284	1.90323	0.097561
ENSG00000143674	0.12426	0.786982	0.0887574	0.157895	0.112782	0.714286	0.141892	3.69444	0.0974026	169					ENSG00000143674	0.12426	0.786982	0.0887574	ENSG00000143674	0.12426	0.786982	0.0887574									ENSG00000143674	0.157895	0.112782	0.714286	ENSG00000143674	0.157895	0.112782	0.714286									ENSG00000143674	0.141892	3.69444
MTHFD1	0.213018	0.698225	0.0887574	0.305085	0.127119	0.416667	0.270677	2.31373	0.0974026	169					MTHFD1	0.213018	0.698225	0.0887574	MTHFD1	0.213018	0.698225	0.0887574									MTHFD1	0.305085	0.127119	0.416667	MTHFD1	0.305085	0.127119	0.416667					MTHFD1	0.270677	2.31373	0.0974026
ALG9_ENST00000428306	0.306452	0.604839	0.0887097	0.506667	0.146667	0.289474	0.44186	1.53061	0.0973451	124					ALG9_ENST00000428306	0.306452	0.604839	0.0887097	ALG9_ENST00000428306	0.306452	0.604839	0.0887097									ALG9_ENST00000428306	0.506667	0.146667	0.289474	ALG9_ENST00000428306	0.506667	0.146667	0.289474					ALG9_ENST00000428306	0.44186	1.53061	0.0973451
FDXACB1	0.322581	0.58871	0.0887097	0.547945	0.150685	0.275	0.47619	1.43137	0.0973451	124					FDXACB1	0.322581	0.58871	0.0887097					FDXACB1	0.322581	0.58871	0.0887097					FDXACB1	0.547945	0.150685	0.275	FDXACB1	0.547945	0.150685	0.275									FDXACB1	0.47619	1.43137
LRRC7_ENST00000370958	0.266129	0.645161	0.0887097	0.4125	0.1375	0.333333	0.362637	1.81818	0.0973451	124					LRRC7_ENST00000370958	0.266129	0.645161	0.0887097	LRRC7_ENST00000370958	0.266129	0.645161	0.0887097									LRRC7_ENST00000370958	0.4125	0.1375	0.333333	LRRC7_ENST00000370958	0.4125	0.1375	0.333333					LRRC7_ENST00000370958	0.362637	1.81818	0.0973451
DNAJC14	0.193548	0.717742	0.0887097	0.269663	0.123596	0.458333	0.24	2.54286	0.0973451	124					DNAJC14	0.193548	0.717742	0.0887097	DNAJC14	0.193548	0.717742	0.0887097					DNAJC14	0.269663	0.123596	0.458333					DNAJC14	0.269663	0.123596	0.458333					DNAJC14	0.24	2.54286	0.0973451
CEP290_ENST00000309041	0.0935961	0.817734	0.08867	0.114458	0.108434	0.947368	0.103261	4.48649	0.0972973	203					CEP290_ENST00000309041	0.0935961	0.817734	0.08867					CEP290_ENST00000309041	0.0935961	0.817734	0.08867					CEP290_ENST00000309041	0.114458	0.108434	0.947368					CEP290_ENST00000309041	0.114458	0.947368	0.947368					CEP290_ENST00000309041	0.103261	4.48649
MTHFD1_ENST00000216605	0.21519	0.696203	0.0886076	0.309091	0.127273	0.411765	0.274194	2.29167	0.0972222	158					MTHFD1_ENST00000216605	0.21519	0.696203	0.0886076	MTHFD1_ENST00000216605	0.21519	0.696203	0.0886076									MTHFD1_ENST00000216605	0.309091	0.127273	0.411765	MTHFD1_ENST00000216605	0.309091	0.127273	0.411765					MTHFD1_ENST00000216605	0.274194	2.29167	0.0972222
PEX5L_ENST00000263962	0.21519	0.696203	0.0886076	0.309091	0.127273	0.411765	0.274194	2.29167	0.0972222	237					PEX5L_ENST00000263962	0.21519	0.696203	0.0886076	PEX5L_ENST00000263962	0.21519	0.696203	0.0886076									PEX5L_ENST00000263962	0.309091	0.127273	0.411765	PEX5L_ENST00000263962	0.309091	0.127273	0.411765					PEX5L_ENST00000263962	0.274194	2.29167	0.0972222
SYCP2	0.172152	0.739241	0.0886076	0.232877	0.119863	0.514706	0.207951	2.83495	0.0972222	395					SYCP2	0.172152	0.739241	0.0886076	SYCP2	0.172152	0.739241	0.0886076									SYCP2	0.232877	0.119863	0.514706	SYCP2	0.232877	0.119863	0.514706									SYCP2	0.207951	2.83495
SNX13	0.171875	0.739583	0.0885417	0.232394	0.119718	0.515152	0.207547	2.84	0.0971429	192					SNX13	0.171875	0.739583	0.0885417	SNX13	0.171875	0.739583	0.0885417									SNX13	0.232394	0.119718	0.515152	SNX13	0.232394	0.119718	0.515152									SNX13	0.207547	2.84
TRDN	0.0884956	0.823009	0.0884956	0.107527	0.107527	1	0.0970874	4.65	0.0970874	226					TRDN	0.0884956	0.823009	0.0884956					TRDN	0.0884956	0.823009	0.0884956					TRDN	0.107527	0.107527	1					TRDN	0.107527	1	1					TRDN	0.0970874	4.65
SRC	0.234513	0.676991	0.0884956	0.346405	0.130719	0.377358	0.306358	2.09589	0.0970874	226					SRC	0.234513	0.676991	0.0884956	SRC	0.234513	0.676991	0.0884956									SRC	0.346405	0.130719	0.377358	SRC	0.346405	0.130719	0.377358					SRC	0.306358	2.09589	0.0970874
IL31RA_ENST00000359040	0.238095	0.673469	0.0884354	0.353535	0.131313	0.371429	0.3125	2.0625	0.0970149	147					IL31RA_ENST00000359040	0.238095	0.673469	0.0884354	IL31RA_ENST00000359040	0.238095	0.673469	0.0884354									IL31RA_ENST00000359040	0.353535	0.131313	0.371429	IL31RA_ENST00000359040	0.353535	0.131313	0.371429					IL31RA_ENST00000359040	0.3125	2.0625	0.0970149
KIF11	0.156463	0.755102	0.0884354	0.207207	0.117117	0.565217	0.185484	3.08333	0.0970149	147					KIF11	0.156463	0.755102	0.0884354	KIF11	0.156463	0.755102	0.0884354									KIF11	0.207207	0.117117	0.565217	KIF11	0.207207	0.117117	0.565217									KIF11	0.185484	3.08333
SLMAP	0.210884	0.70068	0.0884354	0.300971	0.126214	0.419355	0.267241	2.34091	0.0970149	147					SLMAP	0.210884	0.70068	0.0884354	SLMAP	0.210884	0.70068	0.0884354									SLMAP	0.300971	0.126214	0.419355	SLMAP	0.300971	0.126214	0.419355					SLMAP	0.267241	2.34091	0.0970149
TRIP12	0.210884	0.70068	0.0884354	0.300971	0.126214	0.419355	0.267241	2.34091	0.0970149	441					TRIP12	0.210884	0.70068	0.0884354	TRIP12	0.210884	0.70068	0.0884354									TRIP12	0.300971	0.126214	0.419355	TRIP12	0.300971	0.126214	0.419355					TRIP12	0.267241	2.34091	0.0970149
CES5A	0.348066	0.563536	0.0883978	0.617647	0.156863	0.253968	0.533898	1.29114	0.0969697	181					CES5A	0.348066	0.563536	0.0883978					CES5A	0.348066	0.563536	0.0883978					CES5A	0.617647	0.156863	0.253968					CES5A	0.617647	0.253968	0.253968					CES5A	0.533898	1.29114
ZNF665	0.172093	0.739535	0.0883721	0.232704	0.119497	0.513514	0.207865	2.83929	0.0969388	215					ZNF665	0.172093	0.739535	0.0883721	ZNF665	0.172093	0.739535	0.0883721									ZNF665	0.232704	0.119497	0.513514	ZNF665	0.232704	0.119497	0.513514									ZNF665	0.207865	2.83929
BAT2D1_ENST00000392078	0.196468	0.715232	0.0883002	0.274691	0.123457	0.449438	0.244505	2.51163	0.0968523	453					BAT2D1_ENST00000392078	0.196468	0.715232	0.0883002	BAT2D1_ENST00000392078	0.196468	0.715232	0.0883002					BAT2D1_ENST00000392078	0.274691	0.123457	0.449438					BAT2D1_ENST00000392078	0.274691	0.123457	0.449438					BAT2D1_ENST00000392078	0.244505	2.51163	0.0968523
AMFR	0.213235	0.698529	0.0882353	0.305263	0.126316	0.413793	0.271028	2.31707	0.0967742	136					AMFR	0.213235	0.698529	0.0882353	AMFR	0.213235	0.698529	0.0882353									AMFR	0.305263	0.126316	0.413793	AMFR	0.305263	0.126316	0.413793					AMFR	0.271028	2.31707	0.0967742
GRAMD1C	0.125	0.786765	0.0882353	0.158879	0.11215	0.705882	0.142857	3.68966	0.0967742	136					GRAMD1C	0.125	0.786765	0.0882353	GRAMD1C	0.125	0.786765	0.0882353									GRAMD1C	0.158879	0.11215	0.705882	GRAMD1C	0.158879	0.11215	0.705882									GRAMD1C	0.142857	3.68966
IRF2	0.147059	0.764706	0.0882353	0.192308	0.115385	0.6	0.172414	3.25	0.0967742	136					IRF2	0.147059	0.764706	0.0882353	IRF2	0.147059	0.764706	0.0882353									IRF2	0.192308	0.115385	0.6	IRF2	0.192308	0.115385	0.6									IRF2	0.172414	3.25
LDB3_ENST00000372056	0.254902	0.656863	0.0882353	0.38806	0.134328	0.346154	0.342105	1.91429	0.0967742	102					LDB3_ENST00000372056	0.254902	0.656863	0.0882353	LDB3_ENST00000372056	0.254902	0.656863	0.0882353									LDB3_ENST00000372056	0.38806	0.134328	0.346154	LDB3_ENST00000372056	0.38806	0.134328	0.346154					LDB3_ENST00000372056	0.342105	1.91429	0.0967742
PIEZO2	0.264706	0.647059	0.0882353	0.409091	0.136364	0.333333	0.36	1.83333	0.0967742	102					PIEZO2	0.264706	0.647059	0.0882353	PIEZO2	0.264706	0.647059	0.0882353									PIEZO2	0.409091	0.136364	0.333333	PIEZO2	0.409091	0.136364	0.333333					PIEZO2	0.36	1.83333	0.0967742
TUBD1	0.117647	0.794118	0.0882353	0.148148	0.111111	0.75	0.133333	3.85714	0.0967742	102					TUBD1	0.117647	0.794118	0.0882353					TUBD1	0.117647	0.794118	0.0882353					TUBD1	0.148148	0.111111	0.75	TUBD1	0.148148	0.111111	0.75									TUBD1	0.133333	3.85714
ZNF555	0.220588	0.691176	0.0882353	0.319149	0.12766	0.4	0.283019	2.2381	0.0967742	136					ZNF555	0.220588	0.691176	0.0882353	ZNF555	0.220588	0.691176	0.0882353									ZNF555	0.319149	0.12766	0.4	ZNF555	0.319149	0.12766	0.4					ZNF555	0.283019	2.2381	0.0967742
PCCB	0.215686	0.696078	0.0882353	0.309859	0.126761	0.409091	0.275	2.29032	0.0967742	102					PCCB	0.215686	0.696078	0.0882353	PCCB	0.215686	0.696078	0.0882353									PCCB	0.309859	0.126761	0.409091	PCCB	0.309859	0.126761	0.409091					PCCB	0.275	2.29032	0.0967742
PRPF40A_ENST00000410080	0.205882	0.705882	0.0882353	0.291667	0.125	0.428571	0.259259	2.4	0.0967742	170					PRPF40A_ENST00000410080	0.205882	0.705882	0.0882353	PRPF40A_ENST00000410080	0.205882	0.705882	0.0882353									PRPF40A_ENST00000410080	0.291667	0.125	0.428571	PRPF40A_ENST00000410080	0.291667	0.125	0.428571					PRPF40A_ENST00000410080	0.259259	2.4	0.0967742
SULT1C4	0.166667	0.745098	0.0882353	0.223684	0.118421	0.529412	0.2	2.92308	0.0967742	102					SULT1C4	0.166667	0.745098	0.0882353	SULT1C4	0.166667	0.745098	0.0882353									SULT1C4	0.223684	0.118421	0.529412	SULT1C4	0.223684	0.118421	0.529412									SULT1C4	0.2	2.92308
BBX_ENST00000325805	0.233161	0.678756	0.0880829	0.343511	0.129771	0.377778	0.304054	2.1129	0.0965909	193					BBX_ENST00000325805	0.233161	0.678756	0.0880829	BBX_ENST00000325805	0.233161	0.678756	0.0880829									BBX_ENST00000325805	0.343511	0.129771	0.377778	BBX_ENST00000325805	0.343511	0.129771	0.377778					BBX_ENST00000325805	0.304054	2.1129	0.0965909
PI4KB	0.233161	0.678756	0.0880829	0.343511	0.129771	0.377778	0.304054	2.1129	0.0965909	193					PI4KB	0.233161	0.678756	0.0880829	PI4KB	0.233161	0.678756	0.0880829									PI4KB	0.343511	0.129771	0.377778	PI4KB	0.343511	0.129771	0.377778					PI4KB	0.304054	2.1129	0.0965909
HCFC2	0.157233	0.754717	0.0880503	0.208333	0.116667	0.56	0.186567	3.07692	0.0965517	159					HCFC2	0.157233	0.754717	0.0880503	HCFC2	0.157233	0.754717	0.0880503									HCFC2	0.208333	0.116667	0.56	HCFC2	0.208333	0.116667	0.56									HCFC2	0.186567	3.07692
MYO5A_ENST00000358212	0.178484	0.733496	0.0880196	0.243333	0.12	0.493151	0.217262	2.75229	0.0965147	409					MYO5A_ENST00000358212	0.178484	0.733496	0.0880196	MYO5A_ENST00000358212	0.178484	0.733496	0.0880196					MYO5A_ENST00000358212	0.243333	0.12	0.493151					MYO5A_ENST00000358212	0.243333	0.12	0.493151									MYO5A_ENST00000358212	0.217262	2.75229
SYTL2_ENST00000359152	0.184	0.728	0.088	0.252747	0.120879	0.478261	0.22549	2.67647	0.0964912	250					SYTL2_ENST00000359152	0.184	0.728	0.088	SYTL2_ENST00000359152	0.184	0.728	0.088					SYTL2_ENST00000359152	0.252747	0.120879	0.478261					SYTL2_ENST00000359152	0.252747	0.120879	0.478261					SYTL2_ENST00000359152	0.22549	2.67647	0.0964912
ACSM2A	0.228	0.684	0.088	0.333333	0.128655	0.385965	0.295337	2.16456	0.0964912	250					ACSM2A	0.228	0.684	0.088	ACSM2A	0.228	0.684	0.088									ACSM2A	0.333333	0.128655	0.385965	ACSM2A	0.333333	0.128655	0.385965					ACSM2A	0.295337	2.16456	0.0964912
HEPACAM	0.272	0.64	0.088	0.425	0.1375	0.323529	0.373626	1.77778	0.0964912	125					HEPACAM	0.272	0.64	0.088	HEPACAM	0.272	0.64	0.088									HEPACAM	0.425	0.1375	0.323529	HEPACAM	0.425	0.1375	0.323529					HEPACAM	0.373626	1.77778	0.0964912
IL31RA_ENST00000396836	0.24	0.672	0.088	0.357143	0.130952	0.366667	0.315789	2.04878	0.0964912	125					IL31RA_ENST00000396836	0.24	0.672	0.088	IL31RA_ENST00000396836	0.24	0.672	0.088									IL31RA_ENST00000396836	0.357143	0.130952	0.366667	IL31RA_ENST00000396836	0.357143	0.130952	0.366667					IL31RA_ENST00000396836	0.315789	2.04878	0.0964912
RPGR_ENST00000342811	0.16	0.752	0.088	0.212766	0.117021	0.55	0.190476	3.03226	0.0964912	125					RPGR_ENST00000342811	0.16	0.752	0.088	RPGR_ENST00000342811	0.16	0.752	0.088									RPGR_ENST00000342811	0.212766	0.117021	0.55	RPGR_ENST00000342811	0.212766	0.117021	0.55									RPGR_ENST00000342811	0.190476	3.03226
SLC12A2	0.194444	0.717593	0.087963	0.270968	0.122581	0.452381	0.241379	2.54098	0.0964467	216					SLC12A2	0.194444	0.717593	0.087963	SLC12A2	0.194444	0.717593	0.087963					SLC12A2	0.270968	0.122581	0.452381					SLC12A2	0.270968	0.122581	0.452381					SLC12A2	0.241379	2.54098	0.0964467
ANKRD31_ENST00000274361	0.10989	0.802198	0.0879121	0.136986	0.109589	0.8	0.123457	4.05556	0.0963855	182					ANKRD31_ENST00000274361	0.10989	0.802198	0.0879121					ANKRD31_ENST00000274361	0.10989	0.802198	0.0879121					ANKRD31_ENST00000274361	0.136986	0.109589	0.8	ANKRD31_ENST00000274361	0.136986	0.109589	0.8									ANKRD31_ENST00000274361	0.123457	4.05556
DDX43	0.225275	0.686813	0.0879121	0.328	0.128	0.390244	0.29078	2.19298	0.0963855	182					DDX43	0.225275	0.686813	0.0879121	DDX43	0.225275	0.686813	0.0879121									DDX43	0.328	0.128	0.390244	DDX43	0.328	0.128	0.390244					DDX43	0.29078	2.19298	0.0963855
UACA	0.192469	0.719665	0.0878661	0.267442	0.122093	0.456522	0.238342	2.56716	0.0963303	239					UACA	0.192469	0.719665	0.0878661	UACA	0.192469	0.719665	0.0878661					UACA	0.267442	0.122093	0.456522					UACA	0.267442	0.122093	0.456522					UACA	0.238342	2.56716	0.0963303
GOLIM4	0.135135	0.777027	0.0878378	0.173913	0.113043	0.65	0.15625	3.48485	0.0962963	148					GOLIM4	0.135135	0.777027	0.0878378	GOLIM4	0.135135	0.777027	0.0878378									GOLIM4	0.173913	0.113043	0.65	GOLIM4	0.173913	0.113043	0.65									GOLIM4	0.15625	3.48485
RNF40	0.229268	0.682927	0.0878049	0.335714	0.128571	0.382979	0.297468	2.15385	0.0962567	205					RNF40	0.229268	0.682927	0.0878049	RNF40	0.229268	0.682927	0.0878049									RNF40	0.335714	0.128571	0.382979	RNF40	0.335714	0.128571	0.382979					RNF40	0.297468	2.15385	0.0962567
ZNF264	0.22807	0.684211	0.0877193	0.333333	0.128205	0.384615	0.295455	2.16667	0.0961538	114					ZNF264	0.22807	0.684211	0.0877193	ZNF264	0.22807	0.684211	0.0877193									ZNF264	0.333333	0.128205	0.384615	ZNF264	0.333333	0.128205	0.384615					ZNF264	0.295455	2.16667	0.0961538
ZNF841_ENST00000359973	0.22807	0.684211	0.0877193	0.333333	0.128205	0.384615	0.295455	2.16667	0.0961538	114					ZNF841_ENST00000359973	0.22807	0.684211	0.0877193	ZNF841_ENST00000359973	0.22807	0.684211	0.0877193									ZNF841_ENST00000359973	0.333333	0.128205	0.384615	ZNF841_ENST00000359973	0.333333	0.128205	0.384615					ZNF841_ENST00000359973	0.295455	2.16667	0.0961538
BAG3	0.184211	0.72807	0.0877193	0.253012	0.120482	0.47619	0.225806	2.67742	0.0961538	114					BAG3	0.184211	0.72807	0.0877193	BAG3	0.184211	0.72807	0.0877193					BAG3	0.253012	0.120482	0.47619					BAG3	0.253012	0.120482	0.47619					BAG3	0.225806	2.67742	0.0961538
CCDC144A_ENST00000456009	0.219298	0.692982	0.0877193	0.316456	0.126582	0.4	0.280899	2.25714	0.0961538	114					CCDC144A_ENST00000456009	0.219298	0.692982	0.0877193	CCDC144A_ENST00000456009	0.219298	0.692982	0.0877193									CCDC144A_ENST00000456009	0.316456	0.126582	0.4	CCDC144A_ENST00000456009	0.316456	0.126582	0.4					CCDC144A_ENST00000456009	0.280899	2.25714	0.0961538
CROT	0.166667	0.745614	0.0877193	0.223529	0.117647	0.526316	0.2	2.93103	0.0961538	114					CROT	0.166667	0.745614	0.0877193	CROT	0.166667	0.745614	0.0877193									CROT	0.223529	0.117647	0.526316	CROT	0.223529	0.117647	0.526316									CROT	0.2	2.93103
DNAJC2	0.201754	0.710526	0.0877193	0.283951	0.123457	0.434783	0.252747	2.45455	0.0961538	114					DNAJC2	0.201754	0.710526	0.0877193	DNAJC2	0.201754	0.710526	0.0877193					DNAJC2	0.283951	0.123457	0.434783					DNAJC2	0.283951	0.123457	0.434783					DNAJC2	0.252747	2.45455	0.0961538
KIAA1407	0.201031	0.71134	0.0876289	0.282609	0.123188	0.435897	0.251613	2.46429	0.0960452	194					KIAA1407	0.201031	0.71134	0.0876289	KIAA1407	0.201031	0.71134	0.0876289					KIAA1407	0.282609	0.123188	0.435897					KIAA1407	0.282609	0.123188	0.435897					KIAA1407	0.251613	2.46429	0.0960452
ZNF585A_ENST00000356958	0.206186	0.706186	0.0876289	0.291971	0.124088	0.425	0.25974	2.40351	0.0960452	194					ZNF585A_ENST00000356958	0.206186	0.706186	0.0876289	ZNF585A_ENST00000356958	0.206186	0.706186	0.0876289									ZNF585A_ENST00000356958	0.291971	0.124088	0.425	ZNF585A_ENST00000356958	0.291971	0.124088	0.425					ZNF585A_ENST00000356958	0.25974	2.40351	0.0960452
GLG1	0.186131	0.726277	0.0875912	0.256281	0.120603	0.470588	0.2287	2.65333	0.096	274					GLG1	0.186131	0.726277	0.0875912	GLG1	0.186131	0.726277	0.0875912					GLG1	0.256281	0.120603	0.470588					GLG1	0.256281	0.120603	0.470588					GLG1	0.2287	2.65333	0.096
AC010872_2	0.160584	0.751825	0.0875912	0.213592	0.116505	0.545455	0.191304	3.02941	0.096	137					AC010872_2	0.160584	0.751825	0.0875912	AC010872_2	0.160584	0.751825	0.0875912									AC010872_2	0.213592	0.116505	0.545455	AC010872_2	0.213592	0.116505	0.545455									AC010872_2	0.191304	3.02941
CTSG	0.328467	0.583942	0.0875912	0.5625	0.15	0.266667	0.48913	1.40351	0.096	137					CTSG	0.328467	0.583942	0.0875912					CTSG	0.328467	0.583942	0.0875912					CTSG	0.5625	0.15	0.266667	CTSG	0.5625	0.15	0.266667									CTSG	0.48913	1.40351
RUNX1_ENST00000325074	0.0364964	0.875912	0.0875912	0.0416667	0.1	2.4	0.0378788	7.05882	0.096	137					RUNX1_ENST00000325074	0.0364964	0.875912	0.0875912					RUNX1_ENST00000325074	0.0364964	0.875912	0.0875912					RUNX1_ENST00000325074	0.0416667	0.1	2.4					RUNX1_ENST00000325074	0.0416667	2.4	2.4					RUNX1_ENST00000325074	0.0378788	7.05882
ZNF37A_ENST00000361085	0.19708	0.715328	0.0875912	0.27551	0.122449	0.444444	0.245455	2.51282	0.096	137					ZNF37A_ENST00000361085	0.19708	0.715328	0.0875912	ZNF37A_ENST00000361085	0.19708	0.715328	0.0875912					ZNF37A_ENST00000361085	0.27551	0.122449	0.444444					ZNF37A_ENST00000361085	0.27551	0.122449	0.444444					ZNF37A_ENST00000361085	0.245455	2.51282	0.096
NCAPG2_ENST00000409423	0.239631	0.672811	0.0875576	0.356164	0.130137	0.365385	0.315152	2.05634	0.0959596	217					NCAPG2_ENST00000409423	0.239631	0.672811	0.0875576	NCAPG2_ENST00000409423	0.239631	0.672811	0.0875576									NCAPG2_ENST00000409423	0.356164	0.130137	0.365385	NCAPG2_ENST00000409423	0.356164	0.130137	0.365385					NCAPG2_ENST00000409423	0.315152	2.05634	0.0959596
RAPGEF6	0.198157	0.714286	0.0875576	0.277419	0.122581	0.44186	0.247126	2.5	0.0959596	217					RAPGEF6	0.198157	0.714286	0.0875576	RAPGEF6	0.198157	0.714286	0.0875576					RAPGEF6	0.277419	0.122581	0.44186					RAPGEF6	0.277419	0.122581	0.44186					RAPGEF6	0.247126	2.5	0.0959596
WDR47	0.1625	0.75	0.0875	0.216667	0.116667	0.538462	0.19403	3	0.0958904	160					WDR47	0.1625	0.75	0.0875	WDR47	0.1625	0.75	0.0875									WDR47	0.216667	0.116667	0.538462	WDR47	0.216667	0.116667	0.538462									WDR47	0.19403	3
FANCM	0.196217	0.716312	0.0874704	0.273927	0.122112	0.445783	0.244118	2.525	0.0958549	423					FANCM	0.196217	0.716312	0.0874704	FANCM	0.196217	0.716312	0.0874704					FANCM	0.273927	0.122112	0.445783					FANCM	0.273927	0.122112	0.445783					FANCM	0.244118	2.525	0.0958549
TMPRSS2_ENST00000398585	0.153005	0.759563	0.0874317	0.201439	0.115108	0.571429	0.180645	3.15909	0.0958084	183					TMPRSS2_ENST00000398585	0.153005	0.759563	0.0874317	TMPRSS2_ENST00000398585	0.153005	0.759563	0.0874317									TMPRSS2_ENST00000398585	0.201439	0.115108	0.571429	TMPRSS2_ENST00000398585	0.201439	0.115108	0.571429									TMPRSS2_ENST00000398585	0.180645	3.15909
ABCA10	0.199454	0.713115	0.0874317	0.279693	0.122605	0.438356	0.249147	2.48571	0.0958084	366					ABCA10	0.199454	0.713115	0.0874317	ABCA10	0.199454	0.713115	0.0874317					ABCA10	0.279693	0.122605	0.438356					ABCA10	0.279693	0.122605	0.438356					ABCA10	0.249147	2.48571	0.0958084
ACVR1B	0.114754	0.797814	0.0874317	0.143836	0.109589	0.761905	0.12963	3.94595	0.0958084	183					ACVR1B	0.114754	0.797814	0.0874317					ACVR1B	0.114754	0.797814	0.0874317					ACVR1B	0.143836	0.109589	0.761905	ACVR1B	0.143836	0.109589	0.761905									ACVR1B	0.12963	3.94595
RIC8A	0.203883	0.708738	0.0873786	0.287671	0.123288	0.428571	0.256098	2.43333	0.0957447	103					RIC8A	0.203883	0.708738	0.0873786	RIC8A	0.203883	0.708738	0.0873786					RIC8A	0.287671	0.123288	0.428571					RIC8A	0.287671	0.123288	0.428571					RIC8A	0.256098	2.43333	0.0957447
C9orf93_ENST00000380689	0.262136	0.650485	0.0873786	0.402985	0.134328	0.333333	0.355263	1.86111	0.0957447	103					C9orf93_ENST00000380689	0.262136	0.650485	0.0873786	C9orf93_ENST00000380689	0.262136	0.650485	0.0873786									C9orf93_ENST00000380689	0.402985	0.134328	0.333333	C9orf93_ENST00000380689	0.402985	0.134328	0.333333					C9orf93_ENST00000380689	0.355263	1.86111	0.0957447
CCDC28A	0.23301	0.679612	0.0873786	0.342857	0.128571	0.375	0.303797	2.12121	0.0957447	103					CCDC28A	0.23301	0.679612	0.0873786	CCDC28A	0.23301	0.679612	0.0873786									CCDC28A	0.342857	0.128571	0.375	CCDC28A	0.342857	0.128571	0.375					CCDC28A	0.303797	2.12121	0.0957447
EOGT	0.23301	0.679612	0.0873786	0.342857	0.128571	0.375	0.303797	2.12121	0.0957447	103					EOGT	0.23301	0.679612	0.0873786	EOGT	0.23301	0.679612	0.0873786									EOGT	0.342857	0.128571	0.375	EOGT	0.342857	0.128571	0.375					EOGT	0.303797	2.12121	0.0957447
LPCAT4	0.252427	0.660194	0.0873786	0.382353	0.132353	0.346154	0.337662	1.94286	0.0957447	103					LPCAT4	0.252427	0.660194	0.0873786	LPCAT4	0.252427	0.660194	0.0873786									LPCAT4	0.382353	0.132353	0.346154	LPCAT4	0.382353	0.132353	0.346154					LPCAT4	0.337662	1.94286	0.0957447
MAGEE2	0.228155	0.684466	0.0873786	0.333333	0.12766	0.382979	0.295597	2.16923	0.0957447	206					MAGEE2	0.228155	0.684466	0.0873786	MAGEE2	0.228155	0.684466	0.0873786									MAGEE2	0.333333	0.12766	0.382979	MAGEE2	0.333333	0.12766	0.382979					MAGEE2	0.295597	2.16923	0.0957447
RASSF4	0.271845	0.640777	0.0873786	0.424242	0.136364	0.321429	0.373333	1.78378	0.0957447	103					RASSF4	0.271845	0.640777	0.0873786	RASSF4	0.271845	0.640777	0.0873786									RASSF4	0.424242	0.136364	0.321429	RASSF4	0.424242	0.136364	0.321429					RASSF4	0.373333	1.78378	0.0957447
DMD_ENST00000378687	0.180187	0.732449	0.0873635	0.246006	0.119276	0.484848	0.219791	2.73761	0.0957265	1282					DMD_ENST00000378687	0.180187	0.732449	0.0873635	DMD_ENST00000378687	0.180187	0.732449	0.0873635					DMD_ENST00000378687	0.246006	0.119276	0.484848					DMD_ENST00000378687	0.246006	0.119276	0.484848					DMD_ENST00000378687	0.219791	2.73761	0.0957265
ACSL3_ENST00000357430	0.150794	0.761905	0.0873016	0.197917	0.114583	0.578947	0.17757	3.2	0.0956522	126					ACSL3_ENST00000357430	0.150794	0.761905	0.0873016	ACSL3_ENST00000357430	0.150794	0.761905	0.0873016									ACSL3_ENST00000357430	0.197917	0.114583	0.578947	ACSL3_ENST00000357430	0.197917	0.114583	0.578947									ACSL3_ENST00000357430	0.17757	3.2
GTPBP4	0.230159	0.68254	0.0873016	0.337209	0.127907	0.37931	0.298969	2.15	0.0956522	126					GTPBP4	0.230159	0.68254	0.0873016	GTPBP4	0.230159	0.68254	0.0873016									GTPBP4	0.337209	0.127907	0.37931	GTPBP4	0.337209	0.127907	0.37931					GTPBP4	0.298969	2.15	0.0956522
LEPR	0.198413	0.714286	0.0873016	0.277778	0.122222	0.44	0.247525	2.5	0.0956522	252					LEPR	0.198413	0.714286	0.0873016	LEPR	0.198413	0.714286	0.0873016					LEPR	0.277778	0.122222	0.44					LEPR	0.277778	0.122222	0.44					LEPR	0.247525	2.5	0.0956522
TDRD3_ENST00000535286	0.190476	0.722222	0.0873016	0.263736	0.120879	0.458333	0.235294	2.6	0.0956522	126					TDRD3_ENST00000535286	0.190476	0.722222	0.0873016	TDRD3_ENST00000535286	0.190476	0.722222	0.0873016					TDRD3_ENST00000535286	0.263736	0.120879	0.458333					TDRD3_ENST00000535286	0.263736	0.120879	0.458333					TDRD3_ENST00000535286	0.235294	2.6	0.0956522
WDR76	0.230159	0.68254	0.0873016	0.337209	0.127907	0.37931	0.298969	2.15	0.0956522	126					WDR76	0.230159	0.68254	0.0873016	WDR76	0.230159	0.68254	0.0873016									WDR76	0.337209	0.127907	0.37931	WDR76	0.337209	0.127907	0.37931					WDR76	0.298969	2.15	0.0956522
ZNF577	0.253968	0.65873	0.0873016	0.385542	0.13253	0.34375	0.340426	1.93023	0.0956522	126					ZNF577	0.253968	0.65873	0.0873016	ZNF577	0.253968	0.65873	0.0873016									ZNF577	0.385542	0.13253	0.34375	ZNF577	0.385542	0.13253	0.34375					ZNF577	0.340426	1.93023	0.0956522
PHTF2_ENST00000416283	0.269841	0.642857	0.0873016	0.419753	0.135802	0.323529	0.369565	1.8	0.0956522	126					PHTF2_ENST00000416283	0.269841	0.642857	0.0873016	PHTF2_ENST00000416283	0.269841	0.642857	0.0873016									PHTF2_ENST00000416283	0.419753	0.135802	0.323529	PHTF2_ENST00000416283	0.419753	0.135802	0.323529					PHTF2_ENST00000416283	0.369565	1.8	0.0956522
LRRIQ1_ENST00000393217	0.181208	0.731544	0.0872483	0.247706	0.119266	0.481481	0.221311	2.725	0.0955882	596					LRRIQ1_ENST00000393217	0.181208	0.731544	0.0872483	LRRIQ1_ENST00000393217	0.181208	0.731544	0.0872483					LRRIQ1_ENST00000393217	0.247706	0.119266	0.481481					LRRIQ1_ENST00000393217	0.247706	0.119266	0.481481					LRRIQ1_ENST00000393217	0.221311	2.725	0.0955882
PLCE1_ENST00000371380	0.208723	0.70405	0.0872274	0.29646	0.123894	0.41791	0.26378	2.37895	0.0955631	321					PLCE1_ENST00000371380	0.208723	0.70405	0.0872274	PLCE1_ENST00000371380	0.208723	0.70405	0.0872274					PLCE1_ENST00000371380	0.29646	0.123894	0.41791					PLCE1_ENST00000371380	0.29646	0.123894	0.41791					PLCE1_ENST00000371380	0.26378	2.37895	0.0955631
IPO11	0.162791	0.75	0.0872093	0.217054	0.116279	0.535714	0.194444	3	0.0955414	172					IPO11	0.162791	0.75	0.0872093	IPO11	0.162791	0.75	0.0872093									IPO11	0.217054	0.116279	0.535714	IPO11	0.217054	0.116279	0.535714									IPO11	0.194444	3
PPFIA2	0.161922	0.75089	0.0871886	0.21564	0.116114	0.538462	0.193206	3.01429	0.0955166	562					PPFIA2	0.161922	0.75089	0.0871886	PPFIA2	0.161922	0.75089	0.0871886									PPFIA2	0.21564	0.116114	0.538462	PPFIA2	0.21564	0.116114	0.538462									PPFIA2	0.193206	3.01429
NCAPG2	0.220183	0.692661	0.087156	0.317881	0.125828	0.395833	0.282353	2.25373	0.0954774	218					NCAPG2	0.220183	0.692661	0.087156	NCAPG2	0.220183	0.692661	0.087156									NCAPG2	0.317881	0.125828	0.395833	NCAPG2	0.317881	0.125828	0.395833					NCAPG2	0.282353	2.25373	0.0954774
ZNF318	0.207059	0.705882	0.0870588	0.293333	0.123333	0.420455	0.261128	2.4	0.0953608	425					ZNF318	0.207059	0.705882	0.0870588	ZNF318	0.207059	0.705882	0.0870588					ZNF318	0.293333	0.123333	0.420455					ZNF318	0.293333	0.123333	0.420455					ZNF318	0.261128	2.4	0.0953608
BCORL1	0.269151	0.643892	0.0869565	0.418006	0.135048	0.323077	0.368272	1.80814	0.0952381	483					BCORL1	0.269151	0.643892	0.0869565	BCORL1	0.269151	0.643892	0.0869565									BCORL1	0.418006	0.135048	0.323077	BCORL1	0.418006	0.135048	0.323077					BCORL1	0.368272	1.80814	0.0952381
CTNNAL1	0.130435	0.782609	0.0869565	0.166667	0.111111	0.666667	0.15	3.6	0.0952381	115					CTNNAL1	0.130435	0.782609	0.0869565	CTNNAL1	0.130435	0.782609	0.0869565									CTNNAL1	0.166667	0.111111	0.666667	CTNNAL1	0.166667	0.111111	0.666667									CTNNAL1	0.15	3.6
FBXO39	0.278261	0.634783	0.0869565	0.438356	0.136986	0.3125	0.385542	1.7381	0.0952381	115					FBXO39	0.278261	0.634783	0.0869565	FBXO39	0.278261	0.634783	0.0869565									FBXO39	0.438356	0.136986	0.3125	FBXO39	0.438356	0.136986	0.3125					FBXO39	0.385542	1.7381	0.0952381
POU2F3	0.252174	0.66087	0.0869565	0.381579	0.131579	0.344828	0.337209	1.94872	0.0952381	115					POU2F3	0.252174	0.66087	0.0869565	POU2F3	0.252174	0.66087	0.0869565									POU2F3	0.381579	0.131579	0.344828	POU2F3	0.381579	0.131579	0.344828					POU2F3	0.337209	1.94872	0.0952381
TTC16	0.26087	0.652174	0.0869565	0.4	0.133333	0.333333	0.352941	1.875	0.0952381	184					TTC16	0.26087	0.652174	0.0869565	TTC16	0.26087	0.652174	0.0869565									TTC16	0.4	0.133333	0.333333	TTC16	0.4	0.133333	0.333333					TTC16	0.352941	1.875	0.0952381
WDR65	0.161491	0.751553	0.0869565	0.214876	0.115702	0.538462	0.192593	3.025	0.0952381	161					WDR65	0.161491	0.751553	0.0869565	WDR65	0.161491	0.751553	0.0869565									WDR65	0.214876	0.115702	0.538462	WDR65	0.214876	0.115702	0.538462									WDR65	0.192593	3.025
ARMC4_ENST00000434029	0.231884	0.681159	0.0869565	0.340426	0.12766	0.375	0.301887	2.13636	0.0952381	138					ARMC4_ENST00000434029	0.231884	0.681159	0.0869565	ARMC4_ENST00000434029	0.231884	0.681159	0.0869565									ARMC4_ENST00000434029	0.340426	0.12766	0.375	ARMC4_ENST00000434029	0.340426	0.12766	0.375					ARMC4_ENST00000434029	0.301887	2.13636	0.0952381
NCF2	0.282609	0.630435	0.0869565	0.448276	0.137931	0.307692	0.393939	1.70588	0.0952381	138					NCF2	0.282609	0.630435	0.0869565	NCF2	0.282609	0.630435	0.0869565									NCF2	0.448276	0.137931	0.307692	NCF2	0.448276	0.137931	0.307692					NCF2	0.393939	1.70588	0.0952381
SATL1	0.180124	0.732919	0.0869565	0.245763	0.118644	0.482759	0.219697	2.74419	0.0952381	161					SATL1	0.180124	0.732919	0.0869565	SATL1	0.180124	0.732919	0.0869565					SATL1	0.245763	0.118644	0.482759					SATL1	0.245763	0.118644	0.482759					SATL1	0.219697	2.74419	0.0952381
SLC17A3_ENST00000397060	0.268116	0.644928	0.0869565	0.41573	0.134831	0.324324	0.366337	1.81633	0.0952381	138					SLC17A3_ENST00000397060	0.268116	0.644928	0.0869565	SLC17A3_ENST00000397060	0.268116	0.644928	0.0869565									SLC17A3_ENST00000397060	0.41573	0.134831	0.324324	SLC17A3_ENST00000397060	0.41573	0.134831	0.324324					SLC17A3_ENST00000397060	0.366337	1.81633	0.0952381
TEX11	0.233696	0.679348	0.0869565	0.344	0.128	0.372093	0.304965	2.11864	0.0952381	184					TEX11	0.233696	0.679348	0.0869565	TEX11	0.233696	0.679348	0.0869565									TEX11	0.344	0.128	0.372093	TEX11	0.344	0.128	0.372093					TEX11	0.304965	2.11864	0.0952381
ABL2	0.275472	0.637736	0.0867925	0.431953	0.136095	0.315068	0.380208	1.76042	0.0950413	265					ABL2	0.275472	0.637736	0.0867925	ABL2	0.275472	0.637736	0.0867925									ABL2	0.431953	0.136095	0.315068	ABL2	0.431953	0.136095	0.315068					ABL2	0.380208	1.76042	0.0950413
GABRA2	0.194215	0.719008	0.0867769	0.270115	0.12069	0.446809	0.241026	2.55882	0.0950226	242					GABRA2	0.194215	0.719008	0.0867769	GABRA2	0.194215	0.719008	0.0867769					GABRA2	0.270115	0.12069	0.446809					GABRA2	0.270115	0.12069	0.446809					GABRA2	0.241026	2.55882	0.0950226
DMD_ENST00000357033	0.182488	0.730769	0.086743	0.24972	0.118701	0.475336	0.223223	2.71429	0.0949821	1222					DMD_ENST00000357033	0.182488	0.730769	0.086743	DMD_ENST00000357033	0.182488	0.730769	0.086743					DMD_ENST00000357033	0.24972	0.118701	0.475336					DMD_ENST00000357033	0.24972	0.118701	0.475336					DMD_ENST00000357033	0.223223	2.71429	0.0949821
ECM2	0.26	0.653333	0.0866667	0.397959	0.132653	0.333333	0.351351	1.88462	0.0948905	150					ECM2	0.26	0.653333	0.0866667	ECM2	0.26	0.653333	0.0866667									ECM2	0.397959	0.132653	0.333333	ECM2	0.397959	0.132653	0.333333					ECM2	0.351351	1.88462	0.0948905
ETS1	0.28	0.633333	0.0866667	0.442105	0.136842	0.309524	0.388889	1.72727	0.0948905	150					ETS1	0.28	0.633333	0.0866667	ETS1	0.28	0.633333	0.0866667									ETS1	0.442105	0.136842	0.309524	ETS1	0.442105	0.136842	0.309524					ETS1	0.388889	1.72727	0.0948905
BFSP1_ENST00000377868	0.226667	0.686667	0.0866667	0.330097	0.126214	0.382353	0.293103	2.19149	0.0948905	150					BFSP1_ENST00000377868	0.226667	0.686667	0.0866667	BFSP1_ENST00000377868	0.226667	0.686667	0.0866667									BFSP1_ENST00000377868	0.330097	0.126214	0.382353	BFSP1_ENST00000377868	0.330097	0.126214	0.382353					BFSP1_ENST00000377868	0.293103	2.19149	0.0948905
PHF14_ENST00000403050	0.173333	0.74	0.0866667	0.234234	0.117117	0.5	0.209677	2.84615	0.0948905	150					PHF14_ENST00000403050	0.173333	0.74	0.0866667	PHF14_ENST00000403050	0.173333	0.74	0.0866667									PHF14_ENST00000403050	0.234234	0.117117	0.5	PHF14_ENST00000403050	0.234234	0.117117	0.5									PHF14_ENST00000403050	0.209677	2.84615
SLC25A12	0.213333	0.7	0.0866667	0.304762	0.12381	0.40625	0.271186	2.33333	0.0948905	150					SLC25A12	0.213333	0.7	0.0866667	SLC25A12	0.213333	0.7	0.0866667					SLC25A12	0.304762	0.12381	0.40625					SLC25A12	0.304762	0.12381	0.40625					SLC25A12	0.271186	2.33333	0.0948905
ABCE1	0.141732	0.771654	0.0866142	0.183673	0.112245	0.611111	0.165138	3.37931	0.0948276	127					ABCE1	0.141732	0.771654	0.0866142	ABCE1	0.141732	0.771654	0.0866142									ABCE1	0.183673	0.112245	0.611111	ABCE1	0.183673	0.112245	0.611111									ABCE1	0.165138	3.37931
ACSL3	0.149606	0.76378	0.0866142	0.195876	0.113402	0.578947	0.175926	3.23333	0.0948276	127					ACSL3	0.149606	0.76378	0.0866142	ACSL3	0.149606	0.76378	0.0866142									ACSL3	0.195876	0.113402	0.578947	ACSL3	0.195876	0.113402	0.578947									ACSL3	0.175926	3.23333
ZNF461	0.275591	0.637795	0.0866142	0.432099	0.135802	0.314286	0.380435	1.76087	0.0948276	127					ZNF461	0.275591	0.637795	0.0866142	ZNF461	0.275591	0.637795	0.0866142									ZNF461	0.432099	0.135802	0.314286	ZNF461	0.432099	0.135802	0.314286					ZNF461	0.380435	1.76087	0.0948276
ARNTL_ENST00000389708	0.163462	0.75	0.0865385	0.217949	0.115385	0.529412	0.195402	3	0.0947368	104					ARNTL_ENST00000389708	0.163462	0.75	0.0865385	ARNTL_ENST00000389708	0.163462	0.75	0.0865385									ARNTL_ENST00000389708	0.217949	0.115385	0.529412	ARNTL_ENST00000389708	0.217949	0.115385	0.529412									ARNTL_ENST00000389708	0.195402	3
DMKN_ENST00000419602	0.240385	0.673077	0.0865385	0.357143	0.128571	0.36	0.316456	2.05882	0.0947368	104					DMKN_ENST00000419602	0.240385	0.673077	0.0865385	DMKN_ENST00000419602	0.240385	0.673077	0.0865385									DMKN_ENST00000419602	0.357143	0.128571	0.36	DMKN_ENST00000419602	0.357143	0.128571	0.36					DMKN_ENST00000419602	0.316456	2.05882	0.0947368
THSD7B_ENST00000413152	0.199539	0.713956	0.0865052	0.279483	0.121163	0.433526	0.24928	2.49597	0.094697	867					THSD7B_ENST00000413152	0.199539	0.713956	0.0865052	THSD7B_ENST00000413152	0.199539	0.713956	0.0865052					THSD7B_ENST00000413152	0.279483	0.121163	0.433526					THSD7B_ENST00000413152	0.279483	0.121163	0.433526					THSD7B_ENST00000413152	0.24928	2.49597	0.094697
CUL4B	0.140541	0.772973	0.0864865	0.181818	0.111888	0.615385	0.163522	3.40476	0.0946746	185					CUL4B	0.140541	0.772973	0.0864865	CUL4B	0.140541	0.772973	0.0864865									CUL4B	0.181818	0.111888	0.615385	CUL4B	0.181818	0.111888	0.615385									CUL4B	0.163522	3.40476
CNTROB	0.237838	0.675676	0.0864865	0.352	0.128	0.363636	0.312057	2.08333	0.0946746	185					CNTROB	0.237838	0.675676	0.0864865	CNTROB	0.237838	0.675676	0.0864865									CNTROB	0.352	0.128	0.363636	CNTROB	0.352	0.128	0.363636					CNTROB	0.312057	2.08333	0.0946746
NEK5	0.156757	0.756757	0.0864865	0.207143	0.114286	0.551724	0.185897	3.11111	0.0946746	185					NEK5	0.156757	0.756757	0.0864865	NEK5	0.156757	0.756757	0.0864865									NEK5	0.207143	0.114286	0.551724	NEK5	0.207143	0.114286	0.551724									NEK5	0.185897	3.11111
NLRC5_ENST00000436936	0.222222	0.691358	0.0864198	0.321429	0.125	0.388889	0.285714	2.24	0.0945946	243					NLRC5_ENST00000436936	0.222222	0.691358	0.0864198	NLRC5_ENST00000436936	0.222222	0.691358	0.0864198									NLRC5_ENST00000436936	0.321429	0.125	0.388889	NLRC5_ENST00000436936	0.321429	0.125	0.388889					NLRC5_ENST00000436936	0.285714	2.24	0.0945946
PPP4R4	0.197531	0.716049	0.0864198	0.275862	0.12069	0.4375	0.246154	2.52174	0.0945946	243					PPP4R4	0.197531	0.716049	0.0864198	PPP4R4	0.197531	0.716049	0.0864198					PPP4R4	0.275862	0.12069	0.4375					PPP4R4	0.275862	0.12069	0.4375					PPP4R4	0.246154	2.52174	0.0945946
TAF3	0.312757	0.600823	0.0864198	0.520548	0.143836	0.276316	0.45509	1.50515	0.0945946	243					TAF3	0.312757	0.600823	0.0864198	TAF3	0.312757	0.600823	0.0864198									TAF3	0.520548	0.143836	0.276316	TAF3	0.520548	0.143836	0.276316									TAF3	0.45509	1.50515
ACIN1_ENST00000338631	0.230216	0.683453	0.0863309	0.336842	0.126316	0.375	0.299065	2.15909	0.0944882	139					ACIN1_ENST00000338631	0.230216	0.683453	0.0863309	ACIN1_ENST00000338631	0.230216	0.683453	0.0863309									ACIN1_ENST00000338631	0.336842	0.126316	0.375	ACIN1_ENST00000338631	0.336842	0.126316	0.375					ACIN1_ENST00000338631	0.299065	2.15909	0.0944882
GALNT11	0.258993	0.654676	0.0863309	0.395604	0.131868	0.333333	0.349515	1.89583	0.0944882	139					GALNT11	0.258993	0.654676	0.0863309	GALNT11	0.258993	0.654676	0.0863309									GALNT11	0.395604	0.131868	0.333333	GALNT11	0.395604	0.131868	0.333333					GALNT11	0.349515	1.89583	0.0944882
KIF3A	0.143885	0.769784	0.0863309	0.186916	0.11215	0.6	0.168067	3.34375	0.0944882	139					KIF3A	0.143885	0.769784	0.0863309	KIF3A	0.143885	0.769784	0.0863309									KIF3A	0.186916	0.11215	0.6	KIF3A	0.186916	0.11215	0.6									KIF3A	0.168067	3.34375
TCF12_ENST00000438423	0.0791367	0.834532	0.0863309	0.0948276	0.103448	1.09091	0.0859375	5.04348	0.0944882	139					TCF12_ENST00000438423	0.0791367	0.834532	0.0863309					TCF12_ENST00000438423	0.0791367	0.834532	0.0863309					TCF12_ENST00000438423	0.0948276	0.103448	1.09091					TCF12_ENST00000438423	0.0948276	1.09091	1.09091					TCF12_ENST00000438423	0.0859375	5.04348
ACOT12	0.165468	0.748201	0.0863309	0.221154	0.115385	0.521739	0.198276	2.97143	0.0944882	139					ACOT12	0.165468	0.748201	0.0863309	ACOT12	0.165468	0.748201	0.0863309									ACOT12	0.221154	0.115385	0.521739	ACOT12	0.221154	0.115385	0.521739									ACOT12	0.198276	2.97143
ZNF37A	0.201439	0.71223	0.0863309	0.282828	0.121212	0.428571	0.252252	2.475	0.0944882	139					ZNF37A	0.201439	0.71223	0.0863309	ZNF37A	0.201439	0.71223	0.0863309					ZNF37A	0.282828	0.121212	0.428571					ZNF37A	0.282828	0.121212	0.428571					ZNF37A	0.252252	2.475	0.0944882
NLRC5	0.254737	0.658947	0.0863158	0.386581	0.13099	0.338843	0.341808	1.9321	0.09447	475					NLRC5	0.254737	0.658947	0.0863158	NLRC5	0.254737	0.658947	0.0863158									NLRC5	0.386581	0.13099	0.338843	NLRC5	0.386581	0.13099	0.338843					NLRC5	0.341808	1.9321	0.09447
DKK2	0.187817	0.725888	0.0862944	0.258741	0.118881	0.459459	0.23125	2.64815	0.0944444	197					DKK2	0.187817	0.725888	0.0862944	DKK2	0.187817	0.725888	0.0862944					DKK2	0.258741	0.118881	0.459459					DKK2	0.258741	0.118881	0.459459					DKK2	0.23125	2.64815	0.0944444
UGT2A1_ENST00000457664	0.192893	0.720812	0.0862944	0.267606	0.119718	0.447368	0.238994	2.58182	0.0944444	197					UGT2A1_ENST00000457664	0.192893	0.720812	0.0862944	UGT2A1_ENST00000457664	0.192893	0.720812	0.0862944					UGT2A1_ENST00000457664	0.267606	0.119718	0.447368					UGT2A1_ENST00000457664	0.267606	0.119718	0.447368					UGT2A1_ENST00000457664	0.238994	2.58182	0.0944444
LUZP4	0.0948276	0.818966	0.0862069	0.115789	0.105263	0.909091	0.104762	4.52381	0.0943396	116					LUZP4	0.0948276	0.818966	0.0862069					LUZP4	0.0948276	0.818966	0.0862069					LUZP4	0.115789	0.105263	0.909091					LUZP4	0.115789	0.909091	0.909091					LUZP4	0.104762	4.52381
AASDH	0.189655	0.724138	0.0862069	0.261905	0.119048	0.454545	0.234043	2.625	0.0943396	174					AASDH	0.189655	0.724138	0.0862069	AASDH	0.189655	0.724138	0.0862069					AASDH	0.261905	0.119048	0.454545					AASDH	0.261905	0.119048	0.454545					AASDH	0.234043	2.625	0.0943396
C19orf26_ENST00000382477	0.163793	0.75	0.0862069	0.218391	0.114943	0.526316	0.195876	3	0.0943396	116					C19orf26_ENST00000382477	0.163793	0.75	0.0862069	C19orf26_ENST00000382477	0.163793	0.75	0.0862069									C19orf26_ENST00000382477	0.218391	0.114943	0.526316	C19orf26_ENST00000382477	0.218391	0.114943	0.526316									C19orf26_ENST00000382477	0.195876	3
CDK17_ENST00000543119	0.172414	0.741379	0.0862069	0.232558	0.116279	0.5	0.208333	2.86667	0.0943396	116					CDK17_ENST00000543119	0.172414	0.741379	0.0862069	CDK17_ENST00000543119	0.172414	0.741379	0.0862069									CDK17_ENST00000543119	0.232558	0.116279	0.5	CDK17_ENST00000543119	0.232558	0.116279	0.5									CDK17_ENST00000543119	0.208333	2.86667
MUT	0.189655	0.724138	0.0862069	0.261905	0.119048	0.454545	0.234043	2.625	0.0943396	174					MUT	0.189655	0.724138	0.0862069	MUT	0.189655	0.724138	0.0862069					MUT	0.261905	0.119048	0.454545					MUT	0.261905	0.119048	0.454545					MUT	0.234043	2.625	0.0943396
OXSR1_ENST00000311806	0.224138	0.689655	0.0862069	0.325	0.125	0.384615	0.288889	2.22222	0.0943396	116					OXSR1_ENST00000311806	0.224138	0.689655	0.0862069	OXSR1_ENST00000311806	0.224138	0.689655	0.0862069									OXSR1_ENST00000311806	0.325	0.125	0.384615	OXSR1_ENST00000311806	0.325	0.125	0.384615					OXSR1_ENST00000311806	0.288889	2.22222	0.0943396
PPP1R12B_ENST00000336894	0.146552	0.767241	0.0862069	0.191011	0.11236	0.588235	0.171717	3.2963	0.0943396	116					PPP1R12B_ENST00000336894	0.146552	0.767241	0.0862069	PPP1R12B_ENST00000336894	0.146552	0.767241	0.0862069									PPP1R12B_ENST00000336894	0.191011	0.11236	0.588235	PPP1R12B_ENST00000336894	0.191011	0.11236	0.588235									PPP1R12B_ENST00000336894	0.171717	3.2963
SMG7_ENST00000507469	0.25431	0.659483	0.0862069	0.385621	0.130719	0.338983	0.34104	1.93671	0.0943396	232					SMG7_ENST00000507469	0.25431	0.659483	0.0862069	SMG7_ENST00000507469	0.25431	0.659483	0.0862069									SMG7_ENST00000507469	0.385621	0.130719	0.338983	SMG7_ENST00000507469	0.385621	0.130719	0.338983					SMG7_ENST00000507469	0.34104	1.93671	0.0943396
TMPO_ENST00000266732	0.146552	0.767241	0.0862069	0.191011	0.11236	0.588235	0.171717	3.2963	0.0943396	116					TMPO_ENST00000266732	0.146552	0.767241	0.0862069	TMPO_ENST00000266732	0.146552	0.767241	0.0862069									TMPO_ENST00000266732	0.191011	0.11236	0.588235	TMPO_ENST00000266732	0.191011	0.11236	0.588235									TMPO_ENST00000266732	0.171717	3.2963
DNAH10	0.218543	0.695364	0.0860927	0.314286	0.12381	0.393939	0.279661	2.28261	0.0942029	302					DNAH10	0.218543	0.695364	0.0860927	DNAH10	0.218543	0.695364	0.0860927					DNAH10	0.314286	0.12381	0.393939					DNAH10	0.314286	0.12381	0.393939					DNAH10	0.279661	2.28261	0.0942029
DQX1_ENST00000404568	0.225166	0.688742	0.0860927	0.326923	0.125	0.382353	0.290598	2.21277	0.0942029	151					DQX1_ENST00000404568	0.225166	0.688742	0.0860927	DQX1_ENST00000404568	0.225166	0.688742	0.0860927									DQX1_ENST00000404568	0.326923	0.125	0.382353	DQX1_ENST00000404568	0.326923	0.125	0.382353					DQX1_ENST00000404568	0.290598	2.21277	0.0942029
LIMA1	0.211921	0.701987	0.0860927	0.301887	0.122642	0.40625	0.268908	2.35556	0.0942029	151					LIMA1	0.211921	0.701987	0.0860927	LIMA1	0.211921	0.701987	0.0860927					LIMA1	0.301887	0.122642	0.40625					LIMA1	0.301887	0.122642	0.40625					LIMA1	0.268908	2.35556	0.0942029
MLLT10_ENST00000377072	0.16129	0.752688	0.0860215	0.214286	0.114286	0.533333	0.192308	3.04348	0.0941176	186					MLLT10_ENST00000377072	0.16129	0.752688	0.0860215	MLLT10_ENST00000377072	0.16129	0.752688	0.0860215									MLLT10_ENST00000377072	0.214286	0.114286	0.533333	MLLT10_ENST00000377072	0.214286	0.114286	0.533333									MLLT10_ENST00000377072	0.192308	3.04348
SMARCA1	0.180995	0.733032	0.0859729	0.246914	0.117284	0.475	0.220994	2.74576	0.0940594	221					SMARCA1	0.180995	0.733032	0.0859729	SMARCA1	0.180995	0.733032	0.0859729					SMARCA1	0.246914	0.117284	0.475					SMARCA1	0.246914	0.117284	0.475					SMARCA1	0.220994	2.74576	0.0940594
ABL1_ENST00000318560	0.179688	0.734375	0.0859375	0.244681	0.117021	0.478261	0.219048	2.76471	0.0940171	384					ABL1_ENST00000318560	0.179688	0.734375	0.0859375	ABL1_ENST00000318560	0.179688	0.734375	0.0859375					ABL1_ENST00000318560	0.244681	0.117021	0.478261					ABL1_ENST00000318560	0.244681	0.117021	0.478261					ABL1_ENST00000318560	0.219048	2.76471	0.0940171
ABL2_ENST00000502732	0.273438	0.640625	0.0859375	0.426829	0.134146	0.314286	0.376344	1.78261	0.0940171	256					ABL2_ENST00000502732	0.273438	0.640625	0.0859375	ABL2_ENST00000502732	0.273438	0.640625	0.0859375									ABL2_ENST00000502732	0.426829	0.134146	0.314286	ABL2_ENST00000502732	0.426829	0.134146	0.314286					ABL2_ENST00000502732	0.376344	1.78261	0.0940171
ACRBP	0.335938	0.578125	0.0859375	0.581081	0.148649	0.255814	0.505882	1.37037	0.0940171	128					ACRBP	0.335938	0.578125	0.0859375					ACRBP	0.335938	0.578125	0.0859375					ACRBP	0.581081	0.148649	0.255814	ACRBP	0.581081	0.148649	0.255814									ACRBP	0.505882	1.37037
CCDC50	0.257812	0.65625	0.0859375	0.392857	0.130952	0.333333	0.347368	1.90909	0.0940171	128					CCDC50	0.257812	0.65625	0.0859375	CCDC50	0.257812	0.65625	0.0859375									CCDC50	0.392857	0.130952	0.333333	CCDC50	0.392857	0.130952	0.333333					CCDC50	0.347368	1.90909	0.0940171
CEP70	0.195312	0.71875	0.0859375	0.271739	0.119565	0.44	0.242718	2.55556	0.0940171	128					CEP70	0.195312	0.71875	0.0859375	CEP70	0.195312	0.71875	0.0859375					CEP70	0.271739	0.119565	0.44					CEP70	0.271739	0.119565	0.44					CEP70	0.242718	2.55556	0.0940171
TAS2R41	0.328125	0.585938	0.0859375	0.56	0.146667	0.261905	0.488372	1.41509	0.0940171	128					TAS2R41	0.328125	0.585938	0.0859375					TAS2R41	0.328125	0.585938	0.0859375					TAS2R41	0.56	0.146667	0.261905	TAS2R41	0.56	0.146667	0.261905									TAS2R41	0.488372	1.41509
ZNF512	0.210938	0.703125	0.0859375	0.3	0.122222	0.407407	0.267327	2.36842	0.0940171	128					ZNF512	0.210938	0.703125	0.0859375	ZNF512	0.210938	0.703125	0.0859375					ZNF512	0.3	0.122222	0.407407					ZNF512	0.3	0.122222	0.407407					ZNF512	0.267327	2.36842	0.0940171
AMHR2	0.251534	0.662577	0.0858896	0.37963	0.12963	0.341463	0.336066	1.96364	0.0939597	163					AMHR2	0.251534	0.662577	0.0858896	AMHR2	0.251534	0.662577	0.0858896									AMHR2	0.37963	0.12963	0.341463	AMHR2	0.37963	0.12963	0.341463					AMHR2	0.336066	1.96364	0.0939597
INTS2	0.20202	0.712121	0.0858586	0.283688	0.120567	0.425	0.253165	2.47368	0.0939227	198					INTS2	0.20202	0.712121	0.0858586	INTS2	0.20202	0.712121	0.0858586					INTS2	0.283688	0.120567	0.425					INTS2	0.283688	0.120567	0.425					INTS2	0.253165	2.47368	0.0939227
CENPC1	0.15	0.764286	0.0857143	0.196262	0.11215	0.571429	0.176471	3.24242	0.09375	140					CENPC1	0.15	0.764286	0.0857143	CENPC1	0.15	0.764286	0.0857143									CENPC1	0.196262	0.11215	0.571429	CENPC1	0.196262	0.11215	0.571429									CENPC1	0.176471	3.24242
APOL5	0.209524	0.704762	0.0857143	0.297297	0.121622	0.409091	0.26506	2.3871	0.09375	105					APOL5	0.209524	0.704762	0.0857143	APOL5	0.209524	0.704762	0.0857143					APOL5	0.297297	0.121622	0.409091					APOL5	0.297297	0.121622	0.409091					APOL5	0.26506	2.3871	0.09375
TCEB3	0.2	0.714286	0.0857143	0.28	0.12	0.428571	0.25	2.5	0.09375	140					TCEB3	0.2	0.714286	0.0857143	TCEB3	0.2	0.714286	0.0857143					TCEB3	0.28	0.12	0.428571					TCEB3	0.28	0.12	0.428571					TCEB3	0.25	2.5	0.09375
ZMAT1	0.264286	0.65	0.0857143	0.406593	0.131868	0.324324	0.359223	1.85714	0.09375	140					ZMAT1	0.264286	0.65	0.0857143	ZMAT1	0.264286	0.65	0.0857143									ZMAT1	0.406593	0.131868	0.324324	ZMAT1	0.406593	0.131868	0.324324					ZMAT1	0.359223	1.85714	0.09375
RTF1	0.142857	0.771429	0.0857143	0.185185	0.111111	0.6	0.166667	3.375	0.09375	140					RTF1	0.142857	0.771429	0.0857143	RTF1	0.142857	0.771429	0.0857143									RTF1	0.185185	0.111111	0.6	RTF1	0.185185	0.111111	0.6									RTF1	0.166667	3.375
THSD7B	0.199549	0.714769	0.0856821	0.27918	0.119874	0.429379	0.249296	2.50593	0.0937115	887					THSD7B	0.199549	0.714769	0.0856821	THSD7B	0.199549	0.714769	0.0856821					THSD7B	0.27918	0.119874	0.429379					THSD7B	0.27918	0.119874	0.429379					THSD7B	0.249296	2.50593	0.0937115
SYCP1	0.153392	0.761062	0.0855457	0.20155	0.112403	0.557692	0.181185	3.18519	0.0935484	339					SYCP1	0.153392	0.761062	0.0855457	SYCP1	0.153392	0.761062	0.0855457									SYCP1	0.20155	0.112403	0.557692	SYCP1	0.20155	0.112403	0.557692									SYCP1	0.181185	3.18519
CCPG1	0.203947	0.710526	0.0855263	0.287037	0.12037	0.419355	0.256198	2.45455	0.0935252	152					CCPG1	0.203947	0.710526	0.0855263	CCPG1	0.203947	0.710526	0.0855263					CCPG1	0.287037	0.12037	0.419355					CCPG1	0.287037	0.12037	0.419355					CCPG1	0.256198	2.45455	0.0935252
PNPT1	0.177632	0.736842	0.0855263	0.241071	0.116071	0.481481	0.216	2.8	0.0935252	152					PNPT1	0.177632	0.736842	0.0855263	PNPT1	0.177632	0.736842	0.0855263					PNPT1	0.241071	0.116071	0.481481					PNPT1	0.241071	0.116071	0.481481									PNPT1	0.216	2.8
CUX1	0.266033	0.648456	0.0855107	0.410256	0.131868	0.321429	0.36246	1.84459	0.0935065	421					CUX1	0.266033	0.648456	0.0855107	CUX1	0.266033	0.648456	0.0855107									CUX1	0.410256	0.131868	0.321429	CUX1	0.410256	0.131868	0.321429					CUX1	0.36246	1.84459	0.0935065
RAPGEF6_ENST00000308008	0.183761	0.730769	0.0854701	0.251462	0.116959	0.465116	0.225131	2.71429	0.0934579	234					RAPGEF6_ENST00000308008	0.183761	0.730769	0.0854701	RAPGEF6_ENST00000308008	0.183761	0.730769	0.0854701					RAPGEF6_ENST00000308008	0.251462	0.116959	0.465116					RAPGEF6_ENST00000308008	0.251462	0.116959	0.465116					RAPGEF6_ENST00000308008	0.225131	2.71429	0.0934579
ATE1_ENST00000224652	0.239316	0.675214	0.0854701	0.35443	0.126582	0.357143	0.314607	2.07895	0.0934579	117					ATE1_ENST00000224652	0.239316	0.675214	0.0854701	ATE1_ENST00000224652	0.239316	0.675214	0.0854701									ATE1_ENST00000224652	0.35443	0.126582	0.357143	ATE1_ENST00000224652	0.35443	0.126582	0.357143					ATE1_ENST00000224652	0.314607	2.07895	0.0934579
FRMD6_ENST00000344768	0.239316	0.675214	0.0854701	0.35443	0.126582	0.357143	0.314607	2.07895	0.0934579	117					FRMD6_ENST00000344768	0.239316	0.675214	0.0854701	FRMD6_ENST00000344768	0.239316	0.675214	0.0854701									FRMD6_ENST00000344768	0.35443	0.126582	0.357143	FRMD6_ENST00000344768	0.35443	0.126582	0.357143					FRMD6_ENST00000344768	0.314607	2.07895	0.0934579
ZNF846	0.196581	0.717949	0.0854701	0.27381	0.119048	0.434783	0.244681	2.54545	0.0934579	117					ZNF846	0.196581	0.717949	0.0854701	ZNF846	0.196581	0.717949	0.0854701					ZNF846	0.27381	0.119048	0.434783					ZNF846	0.27381	0.119048	0.434783					ZNF846	0.244681	2.54545	0.0934579
SCAI	0.145299	0.769231	0.0854701	0.188889	0.111111	0.588235	0.17	3.33333	0.0934579	117					SCAI	0.145299	0.769231	0.0854701	SCAI	0.145299	0.769231	0.0854701									SCAI	0.188889	0.111111	0.588235	SCAI	0.188889	0.111111	0.588235									SCAI	0.17	3.33333
DDX46	0.19598	0.718593	0.0854271	0.272727	0.118881	0.435897	0.24375	2.55357	0.0934066	199					DDX46	0.19598	0.718593	0.0854271	DDX46	0.19598	0.718593	0.0854271					DDX46	0.272727	0.118881	0.435897					DDX46	0.272727	0.118881	0.435897					DDX46	0.24375	2.55357	0.0934066
USP6_ENST00000250066	0.239669	0.674931	0.0853994	0.355102	0.126531	0.356322	0.315217	2.07627	0.0933735	363					USP6_ENST00000250066	0.239669	0.674931	0.0853994	USP6_ENST00000250066	0.239669	0.674931	0.0853994									USP6_ENST00000250066	0.355102	0.126531	0.356322	USP6_ENST00000250066	0.355102	0.126531	0.356322					USP6_ENST00000250066	0.315217	2.07627	0.0933735
AMOT_ENST00000371959	0.199187	0.715447	0.0853659	0.278409	0.119318	0.428571	0.248731	2.51429	0.0933333	246					AMOT_ENST00000371959	0.199187	0.715447	0.0853659	AMOT_ENST00000371959	0.199187	0.715447	0.0853659					AMOT_ENST00000371959	0.278409	0.119318	0.428571					AMOT_ENST00000371959	0.278409	0.119318	0.428571					AMOT_ENST00000371959	0.248731	2.51429	0.0933333
CAMSAP1L1	0.182927	0.731707	0.0853659	0.25	0.116667	0.466667	0.223881	2.72727	0.0933333	328					CAMSAP1L1	0.182927	0.731707	0.0853659	CAMSAP1L1	0.182927	0.731707	0.0853659					CAMSAP1L1	0.25	0.116667	0.466667					CAMSAP1L1	0.25	0.116667	0.466667					CAMSAP1L1	0.223881	2.72727	0.0933333
CEP120	0.189024	0.72561	0.0853659	0.260504	0.117647	0.451613	0.233083	2.64444	0.0933333	164					CEP120	0.189024	0.72561	0.0853659	CEP120	0.189024	0.72561	0.0853659					CEP120	0.260504	0.117647	0.451613					CEP120	0.260504	0.117647	0.451613					CEP120	0.233083	2.64444	0.0933333
GPC3_ENST00000394299	0.164634	0.75	0.0853659	0.219512	0.113821	0.518519	0.19708	3	0.0933333	164					GPC3_ENST00000394299	0.164634	0.75	0.0853659	GPC3_ENST00000394299	0.164634	0.75	0.0853659									GPC3_ENST00000394299	0.219512	0.113821	0.518519	GPC3_ENST00000394299	0.219512	0.113821	0.518519									GPC3_ENST00000394299	0.19708	3
OTUD4_ENST00000447906	0.170732	0.743902	0.0853659	0.229508	0.114754	0.5	0.205882	2.90476	0.0933333	246					OTUD4_ENST00000447906	0.170732	0.743902	0.0853659	OTUD4_ENST00000447906	0.170732	0.743902	0.0853659									OTUD4_ENST00000447906	0.229508	0.114754	0.5	OTUD4_ENST00000447906	0.229508	0.114754	0.5									OTUD4_ENST00000447906	0.205882	2.90476
HGF	0.118729	0.795987	0.0852843	0.14916	0.107143	0.71831	0.134725	3.90164	0.0932358	598					HGF	0.118729	0.795987	0.0852843					HGF	0.118729	0.795987	0.0852843					HGF	0.14916	0.107143	0.71831	HGF	0.14916	0.107143	0.71831									HGF	0.134725	3.90164
CHRNA3	0.286822	0.627907	0.0852713	0.45679	0.135802	0.297297	0.402174	1.6875	0.0932203	129					CHRNA3	0.286822	0.627907	0.0852713	CHRNA3	0.286822	0.627907	0.0852713									CHRNA3	0.45679	0.135802	0.297297	CHRNA3	0.45679	0.135802	0.297297					CHRNA3	0.402174	1.6875	0.0932203
ZNF770	0.286822	0.627907	0.0852713	0.45679	0.135802	0.297297	0.402174	1.6875	0.0932203	129					ZNF770	0.286822	0.627907	0.0852713	ZNF770	0.286822	0.627907	0.0852713									ZNF770	0.45679	0.135802	0.297297	ZNF770	0.45679	0.135802	0.297297					ZNF770	0.402174	1.6875	0.0932203
ITSN1_ENST00000399338	0.142045	0.772727	0.0852273	0.183824	0.110294	0.6	0.165563	3.4	0.0931677	176					ITSN1_ENST00000399338	0.142045	0.772727	0.0852273	ITSN1_ENST00000399338	0.142045	0.772727	0.0852273									ITSN1_ENST00000399338	0.183824	0.110294	0.6	ITSN1_ENST00000399338	0.183824	0.110294	0.6									ITSN1_ENST00000399338	0.165563	3.4
PHF15_ENST00000448712	0.238636	0.676136	0.0852273	0.352941	0.12605	0.357143	0.313433	2.08772	0.0931677	176					PHF15_ENST00000448712	0.238636	0.676136	0.0852273	PHF15_ENST00000448712	0.238636	0.676136	0.0852273									PHF15_ENST00000448712	0.352941	0.12605	0.357143	PHF15_ENST00000448712	0.352941	0.12605	0.357143					PHF15_ENST00000448712	0.313433	2.08772	0.0931677
CENPF	0.212219	0.702572	0.085209	0.302059	0.121281	0.401515	0.269388	2.36216	0.0931459	622					CENPF	0.212219	0.702572	0.085209	CENPF	0.212219	0.702572	0.085209					CENPF	0.302059	0.121281	0.401515					CENPF	0.302059	0.121281	0.401515					CENPF	0.269388	2.36216	0.0931459
C3orf63	0.165919	0.748879	0.0852018	0.221557	0.113772	0.513514	0.198925	2.98214	0.0931373	223					C3orf63	0.165919	0.748879	0.0852018	C3orf63	0.165919	0.748879	0.0852018									C3orf63	0.221557	0.113772	0.513514	C3orf63	0.221557	0.113772	0.513514									C3orf63	0.198925	2.98214
C4orf21	0.212766	0.702128	0.0851064	0.30303	0.121212	0.4	0.27027	2.35714	0.0930233	141					C4orf21	0.212766	0.702128	0.0851064	C4orf21	0.212766	0.702128	0.0851064					C4orf21	0.30303	0.121212	0.4					C4orf21	0.30303	0.121212	0.4					C4orf21	0.27027	2.35714	0.0930233
C7orf58	0.24924	0.665653	0.0851064	0.374429	0.127854	0.341463	0.331984	1.99091	0.0930233	329					C7orf58	0.24924	0.665653	0.0851064	C7orf58	0.24924	0.665653	0.0851064									C7orf58	0.374429	0.127854	0.341463	C7orf58	0.374429	0.127854	0.341463					C7orf58	0.331984	1.99091	0.0930233
DHX29	0.153191	0.761702	0.0851064	0.201117	0.111732	0.555556	0.180905	3.19643	0.0930233	235					DHX29	0.153191	0.761702	0.0851064	DHX29	0.153191	0.761702	0.0851064									DHX29	0.201117	0.111732	0.555556	DHX29	0.201117	0.111732	0.555556									DHX29	0.180905	3.19643
MAML1	0.25	0.664894	0.0851064	0.376	0.128	0.340426	0.333333	1.98413	0.0930233	188					MAML1	0.25	0.664894	0.0851064	MAML1	0.25	0.664894	0.0851064									MAML1	0.376	0.128	0.340426	MAML1	0.376	0.128	0.340426					MAML1	0.333333	1.98413	0.0930233
TMF1	0.202128	0.712766	0.0851064	0.283582	0.119403	0.421053	0.253333	2.48148	0.0930233	188					TMF1	0.202128	0.712766	0.0851064	TMF1	0.202128	0.712766	0.0851064					TMF1	0.283582	0.119403	0.421053					TMF1	0.283582	0.119403	0.421053					TMF1	0.253333	2.48148	0.0930233
URGCP	0.26383	0.651064	0.0851064	0.405229	0.130719	0.322581	0.358382	1.86585	0.0930233	235					URGCP	0.26383	0.651064	0.0851064	URGCP	0.26383	0.651064	0.0851064									URGCP	0.405229	0.130719	0.322581	URGCP	0.405229	0.130719	0.322581					URGCP	0.358382	1.86585	0.0930233
RUNX1_ENST00000344691	0.035461	0.879433	0.0851064	0.0403226	0.0967742	2.4	0.0367647	7.29412	0.0930233	141					RUNX1_ENST00000344691	0.035461	0.879433	0.0851064					RUNX1_ENST00000344691	0.035461	0.879433	0.0851064					RUNX1_ENST00000344691	0.0403226	0.0967742	2.4					RUNX1_ENST00000344691	0.0403226	2.4	2.4					RUNX1_ENST00000344691	0.0367647	7.29412
BMPR1A_ENST00000224764	0.163121	0.751773	0.0851064	0.216981	0.113208	0.521739	0.194915	3.02857	0.0930233	141					BMPR1A_ENST00000224764	0.163121	0.751773	0.0851064	BMPR1A_ENST00000224764	0.163121	0.751773	0.0851064									BMPR1A_ENST00000224764	0.216981	0.113208	0.521739	BMPR1A_ENST00000224764	0.216981	0.113208	0.521739									BMPR1A_ENST00000224764	0.194915	3.02857
CUX1_ENST00000292538	0.196809	0.718085	0.0851064	0.274074	0.118519	0.432432	0.245033	2.54717	0.0930233	188					CUX1_ENST00000292538	0.196809	0.718085	0.0851064	CUX1_ENST00000292538	0.196809	0.718085	0.0851064					CUX1_ENST00000292538	0.274074	0.118519	0.432432					CUX1_ENST00000292538	0.274074	0.118519	0.432432					CUX1_ENST00000292538	0.245033	2.54717	0.0930233
FAM190A	0.217021	0.697872	0.0851064	0.310976	0.121951	0.392157	0.277174	2.30986	0.0930233	235					FAM190A	0.217021	0.697872	0.0851064	FAM190A	0.217021	0.697872	0.0851064					FAM190A	0.310976	0.121951	0.392157					FAM190A	0.310976	0.121951	0.392157					FAM190A	0.277174	2.30986	0.0930233
PPP3CA	0.265957	0.648936	0.0851064	0.409836	0.131148	0.32	0.362319	1.84848	0.0930233	188					PPP3CA	0.265957	0.648936	0.0851064	PPP3CA	0.265957	0.648936	0.0851064									PPP3CA	0.409836	0.131148	0.32	PPP3CA	0.409836	0.131148	0.32					PPP3CA	0.362319	1.84848	0.0930233
SH2B1_ENST00000322610	0.260638	0.654255	0.0851064	0.398374	0.130081	0.326531	0.352518	1.89231	0.0930233	188					SH2B1_ENST00000322610	0.260638	0.654255	0.0851064	SH2B1_ENST00000322610	0.260638	0.654255	0.0851064									SH2B1_ENST00000322610	0.398374	0.130081	0.326531	SH2B1_ENST00000322610	0.398374	0.130081	0.326531					SH2B1_ENST00000322610	0.352518	1.89231	0.0930233
RAD50	0.0909091	0.824047	0.085044	0.11032	0.103203	0.935484	0.1	4.68333	0.0929487	341					RAD50	0.0909091	0.824047	0.085044					RAD50	0.0909091	0.824047	0.085044					RAD50	0.11032	0.103203	0.935484					RAD50	0.11032	0.935484	0.935484					RAD50	0.1	4.68333
DMD_ENST00000378677	0.182232	0.732726	0.0850418	0.248705	0.116062	0.466667	0.222841	2.74148	0.0929461	1317					DMD_ENST00000378677	0.182232	0.732726	0.0850418	DMD_ENST00000378677	0.182232	0.732726	0.0850418					DMD_ENST00000378677	0.248705	0.116062	0.466667					DMD_ENST00000378677	0.248705	0.116062	0.466667					DMD_ENST00000378677	0.222841	2.74148	0.0929461
GPC3	0.163399	0.751634	0.0849673	0.217391	0.113043	0.52	0.195312	3.02632	0.0928571	153					GPC3	0.163399	0.751634	0.0849673	GPC3	0.163399	0.751634	0.0849673									GPC3	0.217391	0.113043	0.52	GPC3	0.217391	0.113043	0.52									GPC3	0.195312	3.02632
WDR47_ENST00000400794	0.156863	0.75817	0.0849673	0.206897	0.112069	0.541667	0.186047	3.13514	0.0928571	153					WDR47_ENST00000400794	0.156863	0.75817	0.0849673	WDR47_ENST00000400794	0.156863	0.75817	0.0849673									WDR47_ENST00000400794	0.206897	0.112069	0.541667	WDR47_ENST00000400794	0.206897	0.112069	0.541667									WDR47_ENST00000400794	0.186047	3.13514
CERK	0.235849	0.679245	0.0849057	0.347222	0.125	0.36	0.308642	2.11765	0.0927835	106					CERK	0.235849	0.679245	0.0849057	CERK	0.235849	0.679245	0.0849057									CERK	0.347222	0.125	0.36	CERK	0.347222	0.125	0.36					CERK	0.308642	2.11765	0.0927835
DMRTA1	0.264151	0.650943	0.0849057	0.405797	0.130435	0.321429	0.358974	1.86486	0.0927835	106					DMRTA1	0.264151	0.650943	0.0849057	DMRTA1	0.264151	0.650943	0.0849057									DMRTA1	0.405797	0.130435	0.321429	DMRTA1	0.405797	0.130435	0.321429					DMRTA1	0.358974	1.86486	0.0927835
LGALS3BP	0.292453	0.622642	0.0849057	0.469697	0.136364	0.290323	0.413333	1.65	0.0927835	106					LGALS3BP	0.292453	0.622642	0.0849057	LGALS3BP	0.292453	0.622642	0.0849057									LGALS3BP	0.469697	0.136364	0.290323	LGALS3BP	0.469697	0.136364	0.290323					LGALS3BP	0.413333	1.65	0.0927835
NT5C3_ENST00000396152	0.141509	0.773585	0.0849057	0.182927	0.109756	0.6	0.164835	3.41667	0.0927835	106					NT5C3_ENST00000396152	0.141509	0.773585	0.0849057	NT5C3_ENST00000396152	0.141509	0.773585	0.0849057									NT5C3_ENST00000396152	0.182927	0.109756	0.6	NT5C3_ENST00000396152	0.182927	0.109756	0.6									NT5C3_ENST00000396152	0.164835	3.41667
PICALM	0.207547	0.707547	0.0849057	0.293333	0.12	0.409091	0.261905	2.41935	0.0927835	106					PICALM	0.207547	0.707547	0.0849057	PICALM	0.207547	0.707547	0.0849057					PICALM	0.293333	0.12	0.409091					PICALM	0.293333	0.12	0.409091					PICALM	0.261905	2.41935	0.0927835
TADA3	0.235849	0.679245	0.0849057	0.347222	0.125	0.36	0.308642	2.11765	0.0927835	106					TADA3	0.235849	0.679245	0.0849057	TADA3	0.235849	0.679245	0.0849057									TADA3	0.347222	0.125	0.36	TADA3	0.347222	0.125	0.36					TADA3	0.308642	2.11765	0.0927835
GGT7	0.224242	0.690909	0.0848485	0.324561	0.122807	0.378378	0.289062	2.23529	0.0927152	165					GGT7	0.224242	0.690909	0.0848485	GGT7	0.224242	0.690909	0.0848485					GGT7	0.324561	0.122807	0.378378					GGT7	0.324561	0.122807	0.378378					GGT7	0.289062	2.23529	0.0927152
ZNF471	0.187879	0.727273	0.0848485	0.258333	0.116667	0.451613	0.231343	2.66667	0.0927152	165					ZNF471	0.187879	0.727273	0.0848485	ZNF471	0.187879	0.727273	0.0848485					ZNF471	0.258333	0.116667	0.451613					ZNF471	0.258333	0.116667	0.451613					ZNF471	0.231343	2.66667	0.0927152
GON4L	0.20303	0.712121	0.0848485	0.285106	0.119149	0.41791	0.254753	2.47368	0.0927152	330					GON4L	0.20303	0.712121	0.0848485	GON4L	0.20303	0.712121	0.0848485					GON4L	0.285106	0.119149	0.41791					GON4L	0.285106	0.119149	0.41791					GON4L	0.254753	2.47368	0.0927152
ADCK4	0.228814	0.686441	0.0847458	0.333333	0.123457	0.37037	0.296703	2.18919	0.0925926	118					ADCK4	0.228814	0.686441	0.0847458	ADCK4	0.228814	0.686441	0.0847458					ADCK4	0.333333	0.123457	0.37037					ADCK4	0.333333	0.123457	0.37037					ADCK4	0.296703	2.18919	0.0925926
ADCK4_ENST00000324464	0.228814	0.686441	0.0847458	0.333333	0.123457	0.37037	0.296703	2.18919	0.0925926	118					ADCK4_ENST00000324464	0.228814	0.686441	0.0847458	ADCK4_ENST00000324464	0.228814	0.686441	0.0847458					ADCK4_ENST00000324464	0.333333	0.123457	0.37037					ADCK4_ENST00000324464	0.333333	0.123457	0.37037					ADCK4_ENST00000324464	0.296703	2.18919	0.0925926
RIOK2	0.110169	0.805085	0.0847458	0.136842	0.105263	0.769231	0.12381	4.13043	0.0925926	118					RIOK2	0.110169	0.805085	0.0847458					RIOK2	0.110169	0.805085	0.0847458					RIOK2	0.136842	0.105263	0.769231	RIOK2	0.136842	0.105263	0.769231									RIOK2	0.12381	4.13043
PHF14	0.175141	0.740113	0.0847458	0.236641	0.114504	0.483871	0.212329	2.84783	0.0925926	177					PHF14	0.175141	0.740113	0.0847458	PHF14	0.175141	0.740113	0.0847458					PHF14	0.236641	0.114504	0.483871					PHF14	0.236641	0.114504	0.483871									PHF14	0.212329	2.84783
SATL1_ENST00000395409	0.20339	0.711864	0.0847458	0.285714	0.119048	0.416667	0.255319	2.47059	0.0925926	118					SATL1_ENST00000395409	0.20339	0.711864	0.0847458	SATL1_ENST00000395409	0.20339	0.711864	0.0847458					SATL1_ENST00000395409	0.285714	0.119048	0.416667					SATL1_ENST00000395409	0.285714	0.119048	0.416667					SATL1_ENST00000395409	0.255319	2.47059	0.0925926
SEC14L1	0.225989	0.689266	0.0847458	0.327869	0.122951	0.375	0.291971	2.21818	0.0925926	177					SEC14L1	0.225989	0.689266	0.0847458	SEC14L1	0.225989	0.689266	0.0847458					SEC14L1	0.327869	0.122951	0.375					SEC14L1	0.327869	0.122951	0.375					SEC14L1	0.291971	2.21818	0.0925926
TMPRSS2_ENST00000454499	0.146893	0.768362	0.0847458	0.191176	0.110294	0.576923	0.172185	3.31707	0.0925926	177					TMPRSS2_ENST00000454499	0.146893	0.768362	0.0847458	TMPRSS2_ENST00000454499	0.146893	0.768362	0.0847458									TMPRSS2_ENST00000454499	0.191176	0.110294	0.576923	TMPRSS2_ENST00000454499	0.191176	0.110294	0.576923									TMPRSS2_ENST00000454499	0.172185	3.31707
ZC3HC1_ENST00000311873	0.177966	0.737288	0.0847458	0.241379	0.114943	0.47619	0.216495	2.80645	0.0925926	118					ZC3HC1_ENST00000311873	0.177966	0.737288	0.0847458	ZC3HC1_ENST00000311873	0.177966	0.737288	0.0847458					ZC3HC1_ENST00000311873	0.241379	0.114943	0.47619					ZC3HC1_ENST00000311873	0.241379	0.114943	0.47619									ZC3HC1_ENST00000311873	0.216495	2.80645
DYNC2H1_ENST00000398093	0.188525	0.726776	0.0846995	0.259398	0.116541	0.449275	0.232323	2.66	0.0925373	366					DYNC2H1_ENST00000398093	0.188525	0.726776	0.0846995	DYNC2H1_ENST00000398093	0.188525	0.726776	0.0846995					DYNC2H1_ENST00000398093	0.259398	0.116541	0.449275					DYNC2H1_ENST00000398093	0.259398	0.116541	0.449275					DYNC2H1_ENST00000398093	0.232323	2.66	0.0925373
ANKLE2_ENST00000337516	0.246154	0.669231	0.0846154	0.367816	0.126437	0.34375	0.326531	2.02326	0.092437	130					ANKLE2_ENST00000337516	0.246154	0.669231	0.0846154	ANKLE2_ENST00000337516	0.246154	0.669231	0.0846154									ANKLE2_ENST00000337516	0.367816	0.126437	0.34375	ANKLE2_ENST00000337516	0.367816	0.126437	0.34375					ANKLE2_ENST00000337516	0.326531	2.02326	0.092437
CRY1	0.269231	0.646154	0.0846154	0.416667	0.130952	0.314286	0.368421	1.82609	0.092437	130					CRY1	0.269231	0.646154	0.0846154	CRY1	0.269231	0.646154	0.0846154									CRY1	0.416667	0.130952	0.314286	CRY1	0.416667	0.130952	0.314286					CRY1	0.368421	1.82609	0.092437
DDX4_ENST00000511853	0.115385	0.8	0.0846154	0.144231	0.105769	0.733333	0.130435	4	0.092437	130					DDX4_ENST00000511853	0.115385	0.8	0.0846154					DDX4_ENST00000511853	0.115385	0.8	0.0846154					DDX4_ENST00000511853	0.144231	0.105769	0.733333	DDX4_ENST00000511853	0.144231	0.105769	0.733333									DDX4_ENST00000511853	0.130435	4
AIM1L_ENST00000527815	0.292308	0.623077	0.0846154	0.469136	0.135802	0.289474	0.413043	1.65306	0.092437	130					AIM1L_ENST00000527815	0.292308	0.623077	0.0846154	AIM1L_ENST00000527815	0.292308	0.623077	0.0846154									AIM1L_ENST00000527815	0.469136	0.135802	0.289474	AIM1L_ENST00000527815	0.469136	0.135802	0.289474					AIM1L_ENST00000527815	0.413043	1.65306	0.092437
CFHR4_ENST00000367416	0.161538	0.753846	0.0846154	0.214286	0.112245	0.52381	0.192661	3.0625	0.092437	260					CFHR4_ENST00000367416	0.161538	0.753846	0.0846154	CFHR4_ENST00000367416	0.161538	0.753846	0.0846154									CFHR4_ENST00000367416	0.214286	0.112245	0.52381	CFHR4_ENST00000367416	0.214286	0.112245	0.52381									CFHR4_ENST00000367416	0.192661	3.0625
VPRBP	0.215385	0.7	0.0846154	0.307692	0.120879	0.392857	0.27451	2.33333	0.092437	260					VPRBP	0.215385	0.7	0.0846154	VPRBP	0.215385	0.7	0.0846154					VPRBP	0.307692	0.120879	0.392857					VPRBP	0.307692	0.120879	0.392857					VPRBP	0.27451	2.33333	0.092437
GPR113_ENST00000311519	0.228856	0.686567	0.0845771	0.333333	0.123188	0.369565	0.296774	2.19048	0.0923913	201					GPR113_ENST00000311519	0.228856	0.686567	0.0845771	GPR113_ENST00000311519	0.228856	0.686567	0.0845771					GPR113_ENST00000311519	0.333333	0.123188	0.369565					GPR113_ENST00000311519	0.333333	0.123188	0.369565					GPR113_ENST00000311519	0.296774	2.19048	0.0923913
GCC2	0.209559	0.705882	0.0845588	0.296875	0.119792	0.403509	0.265116	2.4	0.0923695	272					GCC2	0.209559	0.705882	0.0845588	GCC2	0.209559	0.705882	0.0845588					GCC2	0.296875	0.119792	0.403509					GCC2	0.296875	0.119792	0.403509					GCC2	0.265116	2.4	0.0923695
DIAPH3	0.207746	0.707746	0.084507	0.293532	0.119403	0.40678	0.262222	2.42169	0.0923077	284					DIAPH3	0.207746	0.707746	0.084507	DIAPH3	0.207746	0.707746	0.084507					DIAPH3	0.293532	0.119403	0.40678					DIAPH3	0.293532	0.119403	0.40678					DIAPH3	0.262222	2.42169	0.0923077
C1orf114	0.176056	0.739437	0.084507	0.238095	0.114286	0.48	0.213675	2.83784	0.0923077	142					C1orf114	0.176056	0.739437	0.084507	C1orf114	0.176056	0.739437	0.084507					C1orf114	0.238095	0.114286	0.48					C1orf114	0.238095	0.114286	0.48									C1orf114	0.213675	2.83784
FIP1L1_ENST00000337488	0.161972	0.753521	0.084507	0.214953	0.11215	0.521739	0.193277	3.05714	0.0923077	142					FIP1L1_ENST00000337488	0.161972	0.753521	0.084507	FIP1L1_ENST00000337488	0.161972	0.753521	0.084507									FIP1L1_ENST00000337488	0.214953	0.11215	0.521739	FIP1L1_ENST00000337488	0.214953	0.11215	0.521739									FIP1L1_ENST00000337488	0.193277	3.05714
SBF2	0.188732	0.726761	0.084507	0.25969	0.116279	0.447761	0.232639	2.65979	0.0923077	355					SBF2	0.188732	0.726761	0.084507	SBF2	0.188732	0.726761	0.084507					SBF2	0.25969	0.116279	0.447761					SBF2	0.25969	0.116279	0.447761					SBF2	0.232639	2.65979	0.0923077
PSME4_ENST00000404125	0.211039	0.704545	0.0844156	0.299539	0.119816	0.4	0.26749	2.38462	0.0921986	308					PSME4_ENST00000404125	0.211039	0.704545	0.0844156	PSME4_ENST00000404125	0.211039	0.704545	0.0844156					PSME4_ENST00000404125	0.299539	0.119816	0.4					PSME4_ENST00000404125	0.299539	0.119816	0.4					PSME4_ENST00000404125	0.26749	2.38462	0.0921986
SCAF8_ENST00000367186	0.21097	0.704641	0.0843882	0.299401	0.11976	0.4	0.26738	2.38571	0.0921659	237					SCAF8_ENST00000367186	0.21097	0.704641	0.0843882	SCAF8_ENST00000367186	0.21097	0.704641	0.0843882					SCAF8_ENST00000367186	0.299401	0.11976	0.4					SCAF8_ENST00000367186	0.299401	0.11976	0.4					SCAF8_ENST00000367186	0.26738	2.38571	0.0921659
C1orf9	0.136546	0.779116	0.0843373	0.175258	0.108247	0.617647	0.15814	3.52727	0.0921053	249					C1orf9	0.136546	0.779116	0.0843373	C1orf9	0.136546	0.779116	0.0843373									C1orf9	0.175258	0.108247	0.617647	C1orf9	0.175258	0.108247	0.617647									C1orf9	0.15814	3.52727
CP	0.200803	0.714859	0.0843373	0.280899	0.117978	0.42	0.251256	2.50704	0.0921053	249					CP	0.200803	0.714859	0.0843373	CP	0.200803	0.714859	0.0843373					CP	0.280899	0.117978	0.42					CP	0.280899	0.117978	0.42					CP	0.251256	2.50704	0.0921053
ZNF782	0.210843	0.704819	0.0843373	0.299145	0.119658	0.4	0.267176	2.38776	0.0921053	166					ZNF782	0.210843	0.704819	0.0843373	ZNF782	0.210843	0.704819	0.0843373					ZNF782	0.299145	0.119658	0.4					ZNF782	0.299145	0.119658	0.4					ZNF782	0.267176	2.38776	0.0921053
ACIN1	0.203065	0.712644	0.0842912	0.284946	0.11828	0.415094	0.254808	2.48	0.0920502	261					ACIN1	0.203065	0.712644	0.0842912	ACIN1	0.203065	0.712644	0.0842912					ACIN1	0.284946	0.11828	0.415094					ACIN1	0.284946	0.11828	0.415094					ACIN1	0.254808	2.48	0.0920502
MYO1A	0.238095	0.677656	0.0842491	0.351351	0.124324	0.353846	0.3125	2.10227	0.092	273					MYO1A	0.238095	0.677656	0.0842491	MYO1A	0.238095	0.677656	0.0842491									MYO1A	0.351351	0.124324	0.353846	MYO1A	0.351351	0.124324	0.353846					MYO1A	0.3125	2.10227	0.092
TNIK_ENST00000436636	0.204082	0.711735	0.0841837	0.286738	0.11828	0.4125	0.25641	2.46903	0.091922	392					TNIK_ENST00000436636	0.204082	0.711735	0.0841837	TNIK_ENST00000436636	0.204082	0.711735	0.0841837					TNIK_ENST00000436636	0.286738	0.11828	0.4125					TNIK_ENST00000436636	0.286738	0.11828	0.4125					TNIK_ENST00000436636	0.25641	2.46903	0.091922
JAK1	0.10325	0.81262	0.08413	0.127059	0.103529	0.814815	0.115139	4.33673	0.091858	523					JAK1	0.10325	0.81262	0.08413					JAK1	0.10325	0.81262	0.08413					JAK1	0.127059	0.103529	0.814815	JAK1	0.127059	0.103529	0.814815									JAK1	0.115139	4.33673
FZD3	0.196262	0.719626	0.0841121	0.272727	0.116883	0.428571	0.244186	2.56667	0.0918367	107					FZD3	0.196262	0.719626	0.0841121	FZD3	0.196262	0.719626	0.0841121					FZD3	0.272727	0.116883	0.428571					FZD3	0.272727	0.116883	0.428571					FZD3	0.244186	2.56667	0.0918367
GLT1D1	0.252336	0.663551	0.0841121	0.380282	0.126761	0.333333	0.3375	1.97222	0.0918367	107					GLT1D1	0.252336	0.663551	0.0841121	GLT1D1	0.252336	0.663551	0.0841121									GLT1D1	0.380282	0.126761	0.333333	GLT1D1	0.380282	0.126761	0.333333					GLT1D1	0.3375	1.97222	0.0918367
KIAA1432	0.219626	0.696262	0.0841121	0.315436	0.120805	0.382979	0.281437	2.29231	0.0918367	214					KIAA1432	0.219626	0.696262	0.0841121	KIAA1432	0.219626	0.696262	0.0841121					KIAA1432	0.315436	0.120805	0.382979					KIAA1432	0.315436	0.120805	0.382979					KIAA1432	0.281437	2.29231	0.0918367
C10orf61	0.235294	0.680672	0.0840336	0.345679	0.123457	0.357143	0.307692	2.13158	0.0917431	119					C10orf61	0.235294	0.680672	0.0840336	C10orf61	0.235294	0.680672	0.0840336					C10orf61	0.345679	0.123457	0.357143					C10orf61	0.345679	0.123457	0.357143					C10orf61	0.307692	2.13158	0.0917431
FCHO2	0.218487	0.697479	0.0840336	0.313253	0.120482	0.384615	0.27957	2.30556	0.0917431	119					FCHO2	0.218487	0.697479	0.0840336	FCHO2	0.218487	0.697479	0.0840336					FCHO2	0.313253	0.120482	0.384615					FCHO2	0.313253	0.120482	0.384615					FCHO2	0.27957	2.30556	0.0917431
FLJ14075	0.168067	0.747899	0.0840336	0.224719	0.11236	0.5	0.20202	2.96667	0.0917431	119					FLJ14075	0.168067	0.747899	0.0840336	FLJ14075	0.168067	0.747899	0.0840336									FLJ14075	0.224719	0.11236	0.5	FLJ14075	0.224719	0.11236	0.5									FLJ14075	0.20202	2.96667
RFTN2	0.226891	0.689076	0.0840336	0.329268	0.121951	0.37037	0.293478	2.21622	0.0917431	119					RFTN2	0.226891	0.689076	0.0840336	RFTN2	0.226891	0.689076	0.0840336					RFTN2	0.329268	0.121951	0.37037					RFTN2	0.329268	0.121951	0.37037					RFTN2	0.293478	2.21622	0.0917431
TNFRSF19	0.159664	0.756303	0.0840336	0.211111	0.111111	0.526316	0.19	3.10345	0.0917431	119					TNFRSF19	0.159664	0.756303	0.0840336	TNFRSF19	0.159664	0.756303	0.0840336									TNFRSF19	0.211111	0.111111	0.526316	TNFRSF19	0.211111	0.111111	0.526316									TNFRSF19	0.19	3.10345
CXCR4	0.229008	0.687023	0.0839695	0.333333	0.122222	0.366667	0.29703	2.19512	0.0916667	131					CXCR4	0.229008	0.687023	0.0839695	CXCR4	0.229008	0.687023	0.0839695					CXCR4	0.333333	0.122222	0.366667					CXCR4	0.333333	0.122222	0.366667					CXCR4	0.29703	2.19512	0.0916667
ZNF75D	0.206107	0.709924	0.0839695	0.290323	0.11828	0.407407	0.259615	2.44737	0.0916667	131					ZNF75D	0.206107	0.709924	0.0839695	ZNF75D	0.206107	0.709924	0.0839695					ZNF75D	0.290323	0.11828	0.407407					ZNF75D	0.290323	0.11828	0.407407					ZNF75D	0.259615	2.44737	0.0916667
KIF3A_ENST00000378735	0.13986	0.776224	0.0839161	0.18018	0.108108	0.6	0.162602	3.46875	0.0916031	143					KIF3A_ENST00000378735	0.13986	0.776224	0.0839161	KIF3A_ENST00000378735	0.13986	0.776224	0.0839161									KIF3A_ENST00000378735	0.18018	0.108108	0.6	KIF3A_ENST00000378735	0.18018	0.108108	0.6									KIF3A_ENST00000378735	0.162602	3.46875
ZNF502	0.125874	0.79021	0.0839161	0.159292	0.106195	0.666667	0.144	3.76667	0.0916031	143					ZNF502	0.125874	0.79021	0.0839161	ZNF502	0.125874	0.79021	0.0839161									ZNF502	0.159292	0.106195	0.666667	ZNF502	0.159292	0.106195	0.666667									ZNF502	0.144	3.76667
BAT2D1	0.199546	0.716553	0.0839002	0.278481	0.117089	0.420455	0.249292	2.528	0.0915842	441					BAT2D1	0.199546	0.716553	0.0839002	BAT2D1	0.199546	0.716553	0.0839002					BAT2D1	0.278481	0.117089	0.420455					BAT2D1	0.278481	0.117089	0.420455					BAT2D1	0.249292	2.528	0.0915842
BCORL1_ENST00000303743	0.274376	0.641723	0.0839002	0.427562	0.130742	0.305785	0.378125	1.79114	0.0915842	441					BCORL1_ENST00000303743	0.274376	0.641723	0.0839002	BCORL1_ENST00000303743	0.274376	0.641723	0.0839002									BCORL1_ENST00000303743	0.427562	0.130742	0.305785	BCORL1_ENST00000303743	0.427562	0.130742	0.305785					BCORL1_ENST00000303743	0.378125	1.79114	0.0915842
NAA16	0.16129	0.754839	0.083871	0.213675	0.111111	0.52	0.192308	3.07895	0.0915493	155					NAA16	0.16129	0.754839	0.083871	NAA16	0.16129	0.754839	0.083871									NAA16	0.213675	0.111111	0.52	NAA16	0.213675	0.111111	0.52									NAA16	0.192308	3.07895
CHD1	0.196774	0.719355	0.083871	0.273543	0.116592	0.42623	0.24498	2.56322	0.0915493	310					CHD1	0.196774	0.719355	0.083871	CHD1	0.196774	0.719355	0.083871					CHD1	0.273543	0.116592	0.42623					CHD1	0.273543	0.116592	0.42623					CHD1	0.24498	2.56322	0.0915493
TRAF3	0.187097	0.729032	0.083871	0.256637	0.115044	0.448276	0.230159	2.69048	0.0915493	155					TRAF3	0.187097	0.729032	0.083871	TRAF3	0.187097	0.729032	0.083871					TRAF3	0.256637	0.115044	0.448276					TRAF3	0.256637	0.115044	0.448276					TRAF3	0.230159	2.69048	0.0915493
CSF3R	0.13354	0.782609	0.0838509	0.170635	0.107143	0.627907	0.154122	3.6	0.0915254	322					CSF3R	0.13354	0.782609	0.0838509	CSF3R	0.13354	0.782609	0.0838509									CSF3R	0.170635	0.107143	0.627907	CSF3R	0.170635	0.107143	0.627907									CSF3R	0.154122	3.6
RASA2_ENST00000286364	0.143713	0.772455	0.0838323	0.186047	0.108527	0.583333	0.167832	3.39474	0.0915033	167					RASA2_ENST00000286364	0.143713	0.772455	0.0838323	RASA2_ENST00000286364	0.143713	0.772455	0.0838323									RASA2_ENST00000286364	0.186047	0.108527	0.583333	RASA2_ENST00000286364	0.186047	0.108527	0.583333									RASA2_ENST00000286364	0.167832	3.39474
FRMD4B_ENST00000398540	0.22905	0.687151	0.0837989	0.333333	0.121951	0.365854	0.297101	2.19643	0.0914634	179					FRMD4B_ENST00000398540	0.22905	0.687151	0.0837989	FRMD4B_ENST00000398540	0.22905	0.687151	0.0837989					FRMD4B_ENST00000398540	0.333333	0.121951	0.365854					FRMD4B_ENST00000398540	0.333333	0.121951	0.365854					FRMD4B_ENST00000398540	0.297101	2.19643	0.0914634
DENND2C	0.195349	0.72093	0.0837209	0.270968	0.116129	0.428571	0.242775	2.58333	0.0913706	215					DENND2C	0.195349	0.72093	0.0837209	DENND2C	0.195349	0.72093	0.0837209					DENND2C	0.270968	0.116129	0.428571					DENND2C	0.270968	0.116129	0.428571					DENND2C	0.242775	2.58333	0.0913706
POLR2B	0.162791	0.753488	0.0837209	0.216049	0.111111	0.514286	0.194444	3.0566	0.0913706	215					POLR2B	0.162791	0.753488	0.0837209	POLR2B	0.162791	0.753488	0.0837209									POLR2B	0.216049	0.111111	0.514286	POLR2B	0.216049	0.111111	0.514286									POLR2B	0.194444	3.0566
PRB2_ENST00000389362	0.154185	0.762115	0.0837004	0.202312	0.109827	0.542857	0.182292	3.2037	0.0913462	227					PRB2_ENST00000389362	0.154185	0.762115	0.0837004	PRB2_ENST00000389362	0.154185	0.762115	0.0837004									PRB2_ENST00000389362	0.202312	0.109827	0.542857	PRB2_ENST00000389362	0.202312	0.109827	0.542857									PRB2_ENST00000389362	0.182292	3.2037
SMG7	0.250996	0.665339	0.0836653	0.377246	0.125749	0.333333	0.335106	1.9881	0.0913043	251					SMG7	0.250996	0.665339	0.0836653	SMG7	0.250996	0.665339	0.0836653									SMG7	0.377246	0.125749	0.333333	SMG7	0.377246	0.125749	0.333333					SMG7	0.335106	1.9881	0.0913043
GOLGB1	0.179567	0.736842	0.0835913	0.243697	0.113445	0.465517	0.218868	2.8	0.0912162	646					GOLGB1	0.179567	0.736842	0.0835913	GOLGB1	0.179567	0.736842	0.0835913					GOLGB1	0.243697	0.113445	0.465517					GOLGB1	0.243697	0.113445	0.465517					GOLGB1	0.218868	2.8	0.0912162
ZNF560	0.20743	0.708978	0.0835913	0.292576	0.117904	0.402985	0.261719	2.43617	0.0912162	323					ZNF560	0.20743	0.708978	0.0835913	ZNF560	0.20743	0.708978	0.0835913					ZNF560	0.292576	0.117904	0.402985					ZNF560	0.292576	0.117904	0.402985					ZNF560	0.261719	2.43617	0.0912162
PCNX	0.185615	0.730858	0.0835267	0.253968	0.114286	0.45	0.22792	2.71552	0.0911392	431					PCNX	0.185615	0.730858	0.0835267	PCNX	0.185615	0.730858	0.0835267					PCNX	0.253968	0.114286	0.45					PCNX	0.253968	0.114286	0.45					PCNX	0.22792	2.71552	0.0911392
ABCA6	0.205418	0.711061	0.0835214	0.288889	0.11746	0.406593	0.258523	2.46094	0.091133	443					ABCA6	0.205418	0.711061	0.0835214	ABCA6	0.205418	0.711061	0.0835214					ABCA6	0.288889	0.11746	0.406593					ABCA6	0.288889	0.11746	0.406593					ABCA6	0.258523	2.46094	0.091133
ASZ1	0.25	0.666667	0.0833333	0.375	0.125	0.333333	0.333333	2	0.0909091	132					ASZ1	0.25	0.666667	0.0833333	ASZ1	0.25	0.666667	0.0833333									ASZ1	0.375	0.125	0.333333	ASZ1	0.375	0.125	0.333333					ASZ1	0.333333	2	0.0909091
ATE1	0.222222	0.694444	0.0833333	0.32	0.12	0.375	0.285714	2.27273	0.0909091	108					ATE1	0.222222	0.694444	0.0833333	ATE1	0.222222	0.694444	0.0833333					ATE1	0.32	0.12	0.375					ATE1	0.32	0.12	0.375					ATE1	0.285714	2.27273	0.0909091
C14orf39	0.156863	0.759804	0.0833333	0.206452	0.109677	0.53125	0.186047	3.16327	0.0909091	204					C14orf39	0.156863	0.759804	0.0833333	C14orf39	0.156863	0.759804	0.0833333									C14orf39	0.206452	0.109677	0.53125	C14orf39	0.206452	0.109677	0.53125									C14orf39	0.186047	3.16327
CNTRL_ENST00000373855	0.203125	0.713542	0.0833333	0.284672	0.116788	0.410256	0.254902	2.49091	0.0909091	384					CNTRL_ENST00000373855	0.203125	0.713542	0.0833333	CNTRL_ENST00000373855	0.203125	0.713542	0.0833333					CNTRL_ENST00000373855	0.284672	0.116788	0.410256					CNTRL_ENST00000373855	0.284672	0.116788	0.410256					CNTRL_ENST00000373855	0.254902	2.49091	0.0909091
EGFL6	0.258333	0.658333	0.0833333	0.392405	0.126582	0.322581	0.348315	1.92683	0.0909091	120					EGFL6	0.258333	0.658333	0.0833333	EGFL6	0.258333	0.658333	0.0833333									EGFL6	0.392405	0.126582	0.322581	EGFL6	0.392405	0.126582	0.322581					EGFL6	0.348315	1.92683	0.0909091
GAS7	0.224359	0.692308	0.0833333	0.324074	0.12037	0.371429	0.289256	2.25	0.0909091	156					GAS7	0.224359	0.692308	0.0833333	GAS7	0.224359	0.692308	0.0833333					GAS7	0.324074	0.12037	0.371429					GAS7	0.324074	0.12037	0.371429					GAS7	0.289256	2.25	0.0909091
GLB1L2	0.254902	0.661765	0.0833333	0.385185	0.125926	0.326923	0.342105	1.95652	0.0909091	204					GLB1L2	0.254902	0.661765	0.0833333	GLB1L2	0.254902	0.661765	0.0833333									GLB1L2	0.385185	0.125926	0.326923	GLB1L2	0.385185	0.125926	0.326923					GLB1L2	0.342105	1.95652	0.0909091
MIA2	0.133333	0.783333	0.0833333	0.170213	0.106383	0.625	0.153846	3.61538	0.0909091	180					MIA2	0.133333	0.783333	0.0833333	MIA2	0.133333	0.783333	0.0833333									MIA2	0.170213	0.106383	0.625	MIA2	0.170213	0.106383	0.625									MIA2	0.153846	3.61538
PAXIP1_ENST00000397192	0.28125	0.635417	0.0833333	0.442623	0.131148	0.296296	0.391304	1.74286	0.0909091	192					PAXIP1_ENST00000397192	0.28125	0.635417	0.0833333	PAXIP1_ENST00000397192	0.28125	0.635417	0.0833333									PAXIP1_ENST00000397192	0.442623	0.131148	0.296296	PAXIP1_ENST00000397192	0.442623	0.131148	0.296296					PAXIP1_ENST00000397192	0.391304	1.74286	0.0909091
Q8IXV1_HUMAN	0.19697	0.719697	0.0833333	0.273684	0.115789	0.423077	0.245283	2.56757	0.0909091	132					Q8IXV1_HUMAN	0.19697	0.719697	0.0833333	Q8IXV1_HUMAN	0.19697	0.719697	0.0833333					Q8IXV1_HUMAN	0.273684	0.115789	0.423077					Q8IXV1_HUMAN	0.273684	0.115789	0.423077					Q8IXV1_HUMAN	0.245283	2.56757	0.0909091
SLC39A10	0.172222	0.744444	0.0833333	0.231343	0.11194	0.483871	0.208054	2.91304	0.0909091	180					SLC39A10	0.172222	0.744444	0.0833333	SLC39A10	0.172222	0.744444	0.0833333									SLC39A10	0.231343	0.11194	0.483871	SLC39A10	0.231343	0.11194	0.483871									SLC39A10	0.208054	2.91304
TCTN3_ENST00000265993	0.233333	0.683333	0.0833333	0.341463	0.121951	0.357143	0.304348	2.15789	0.0909091	120					TCTN3_ENST00000265993	0.233333	0.683333	0.0833333	TCTN3_ENST00000265993	0.233333	0.683333	0.0833333					TCTN3_ENST00000265993	0.341463	0.121951	0.357143					TCTN3_ENST00000265993	0.341463	0.121951	0.357143					TCTN3_ENST00000265993	0.304348	2.15789	0.0909091
TOP1	0.143519	0.773148	0.0833333	0.185629	0.107784	0.580645	0.167568	3.40816	0.0909091	216					TOP1	0.143519	0.773148	0.0833333	TOP1	0.143519	0.773148	0.0833333									TOP1	0.185629	0.107784	0.580645	TOP1	0.185629	0.107784	0.580645									TOP1	0.167568	3.40816
BCAR3_ENST00000370247	0.291667	0.625	0.0833333	0.466667	0.133333	0.285714	0.411765	1.66667	0.0909091	144					BCAR3_ENST00000370247	0.291667	0.625	0.0833333	BCAR3_ENST00000370247	0.291667	0.625	0.0833333									BCAR3_ENST00000370247	0.466667	0.133333	0.285714	BCAR3_ENST00000370247	0.466667	0.133333	0.285714					BCAR3_ENST00000370247	0.411765	1.66667	0.0909091
CCDC146	0.196078	0.720588	0.0833333	0.272109	0.115646	0.425	0.243902	2.57895	0.0909091	204					CCDC146	0.196078	0.720588	0.0833333	CCDC146	0.196078	0.720588	0.0833333					CCDC146	0.272109	0.115646	0.425					CCDC146	0.272109	0.115646	0.425					CCDC146	0.243902	2.57895	0.0909091
FAM107B	0.259259	0.657407	0.0833333	0.394366	0.126761	0.321429	0.35	1.91892	0.0909091	108					FAM107B	0.259259	0.657407	0.0833333	FAM107B	0.259259	0.657407	0.0833333									FAM107B	0.394366	0.126761	0.321429	FAM107B	0.394366	0.126761	0.321429					FAM107B	0.35	1.91892	0.0909091
MEGF11_ENST00000409699	0.211111	0.705556	0.0833333	0.299213	0.11811	0.394737	0.267606	2.39623	0.0909091	180					MEGF11_ENST00000409699	0.211111	0.705556	0.0833333	MEGF11_ENST00000409699	0.211111	0.705556	0.0833333					MEGF11_ENST00000409699	0.299213	0.11811	0.394737					MEGF11_ENST00000409699	0.299213	0.11811	0.394737					MEGF11_ENST00000409699	0.267606	2.39623	0.0909091
PAPOLA	0.237179	0.679487	0.0833333	0.349057	0.122642	0.351351	0.310924	2.12	0.0909091	156					PAPOLA	0.237179	0.679487	0.0833333	PAPOLA	0.237179	0.679487	0.0833333					PAPOLA	0.349057	0.122642	0.351351					PAPOLA	0.349057	0.122642	0.351351					PAPOLA	0.310924	2.12	0.0909091
SOS2	0.155797	0.76087	0.0833333	0.204762	0.109524	0.534884	0.184549	3.18182	0.0909091	276					SOS2	0.155797	0.76087	0.0833333	SOS2	0.155797	0.76087	0.0833333									SOS2	0.204762	0.109524	0.534884	SOS2	0.204762	0.109524	0.534884									SOS2	0.184549	3.18182
USP6	0.289683	0.626984	0.0833333	0.462025	0.132911	0.287671	0.407821	1.68085	0.0909091	252					USP6	0.289683	0.626984	0.0833333	USP6	0.289683	0.626984	0.0833333									USP6	0.462025	0.132911	0.287671	USP6	0.462025	0.132911	0.287671					USP6	0.407821	1.68085	0.0909091
XIAP	0.138889	0.777778	0.0833333	0.178571	0.107143	0.6	0.16129	3.5	0.0909091	144					XIAP	0.138889	0.777778	0.0833333	XIAP	0.138889	0.777778	0.0833333									XIAP	0.178571	0.107143	0.6	XIAP	0.178571	0.107143	0.6									XIAP	0.16129	3.5
MSR1	0.181159	0.735507	0.0833333	0.246305	0.1133	0.46	0.221239	2.78082	0.0909091	276					MSR1	0.181159	0.735507	0.0833333	MSR1	0.181159	0.735507	0.0833333					MSR1	0.246305	0.1133	0.46					MSR1	0.246305	0.1133	0.46					MSR1	0.221239	2.78082	0.0909091
DMD_ENST00000378682	0.167494	0.74938	0.0831266	0.22351	0.110927	0.496296	0.201192	2.9901	0.0906631	806					DMD_ENST00000378682	0.167494	0.74938	0.0831266	DMD_ENST00000378682	0.167494	0.74938	0.0831266									DMD_ENST00000378682	0.22351	0.110927	0.496296	DMD_ENST00000378682	0.22351	0.110927	0.496296									DMD_ENST00000378682	0.201192	2.9901
TNIK	0.201511	0.715365	0.0831234	0.28169	0.116197	0.4125	0.252366	2.51327	0.0906593	397					TNIK	0.201511	0.715365	0.0831234	TNIK	0.201511	0.715365	0.0831234					TNIK	0.28169	0.116197	0.4125					TNIK	0.28169	0.116197	0.4125					TNIK	0.252366	2.51327	0.0906593
PTPN14	0.267062	0.649852	0.0830861	0.410959	0.127854	0.311111	0.364372	1.85593	0.0906149	337					PTPN14	0.267062	0.649852	0.0830861	PTPN14	0.267062	0.649852	0.0830861									PTPN14	0.410959	0.127854	0.311111	PTPN14	0.410959	0.127854	0.311111					PTPN14	0.364372	1.85593	0.0906149
POLQ	0.231449	0.685512	0.0830389	0.337629	0.121134	0.358779	0.301149	2.17978	0.0905588	566					POLQ	0.231449	0.685512	0.0830389	POLQ	0.231449	0.685512	0.0830389					POLQ	0.337629	0.121134	0.358779					POLQ	0.337629	0.121134	0.358779					POLQ	0.301149	2.17978	0.0905588
MCTP1	0.241509	0.675472	0.0830189	0.357542	0.122905	0.34375	0.318408	2.0814	0.090535	265					MCTP1	0.241509	0.675472	0.0830189	MCTP1	0.241509	0.675472	0.0830189					MCTP1	0.357542	0.122905	0.34375					MCTP1	0.357542	0.122905	0.34375					MCTP1	0.318408	2.0814	0.090535
BBS9	0.185771	0.731225	0.083004	0.254054	0.113514	0.446809	0.228155	2.72059	0.0905172	253					BBS9	0.185771	0.731225	0.083004	BBS9	0.185771	0.731225	0.083004					BBS9	0.254054	0.113514	0.446809					BBS9	0.254054	0.113514	0.446809					BBS9	0.228155	2.72059	0.0905172
CAPRIN2	0.248963	0.66805	0.0829876	0.372671	0.124224	0.333333	0.331492	2.0125	0.0904977	241					CAPRIN2	0.248963	0.66805	0.0829876	CAPRIN2	0.248963	0.66805	0.0829876									CAPRIN2	0.372671	0.124224	0.333333	CAPRIN2	0.372671	0.124224	0.333333					CAPRIN2	0.331492	2.0125	0.0904977
ABL1_ENST00000372348	0.183938	0.733161	0.0829016	0.250883	0.113074	0.450704	0.225397	2.74757	0.0903955	386					ABL1_ENST00000372348	0.183938	0.733161	0.0829016	ABL1_ENST00000372348	0.183938	0.733161	0.0829016					ABL1_ENST00000372348	0.250883	0.113074	0.450704					ABL1_ENST00000372348	0.250883	0.113074	0.450704					ABL1_ENST00000372348	0.225397	2.74757	0.0903955
PPFIBP1_ENST00000318304	0.253886	0.663212	0.0829016	0.382812	0.125	0.326531	0.340278	1.96923	0.0903955	193					PPFIBP1_ENST00000318304	0.253886	0.663212	0.0829016	PPFIBP1_ENST00000318304	0.253886	0.663212	0.0829016									PPFIBP1_ENST00000318304	0.382812	0.125	0.326531	PPFIBP1_ENST00000318304	0.382812	0.125	0.326531					PPFIBP1_ENST00000318304	0.340278	1.96923	0.0903955
OR52J3	0.254144	0.662983	0.0828729	0.383333	0.125	0.326087	0.340741	1.96721	0.0903614	181					OR52J3	0.254144	0.662983	0.0828729	OR52J3	0.254144	0.662983	0.0828729									OR52J3	0.383333	0.125	0.326087	OR52J3	0.383333	0.125	0.326087					OR52J3	0.340741	1.96721	0.0903614
RIMS2_ENST00000406091	0.227528	0.689607	0.0828652	0.329939	0.120163	0.364198	0.294545	2.22172	0.0903522	712					RIMS2_ENST00000406091	0.227528	0.689607	0.0828652	RIMS2_ENST00000406091	0.227528	0.689607	0.0828652					RIMS2_ENST00000406091	0.329939	0.120163	0.364198					RIMS2_ENST00000406091	0.329939	0.120163	0.364198					RIMS2_ENST00000406091	0.294545	2.22172	0.0903522
CRYBG3	0.16568	0.751479	0.0828402	0.220472	0.110236	0.5	0.198582	3.02381	0.0903226	169					CRYBG3	0.16568	0.751479	0.0828402	CRYBG3	0.16568	0.751479	0.0828402									CRYBG3	0.220472	0.110236	0.5	CRYBG3	0.220472	0.110236	0.5									CRYBG3	0.198582	3.02381
USP15_ENST00000280377	0.16568	0.751479	0.0828402	0.220472	0.110236	0.5	0.198582	3.02381	0.0903226	169					USP15_ENST00000280377	0.16568	0.751479	0.0828402	USP15_ENST00000280377	0.16568	0.751479	0.0828402									USP15_ENST00000280377	0.220472	0.110236	0.5	USP15_ENST00000280377	0.220472	0.110236	0.5									USP15_ENST00000280377	0.198582	3.02381
CASC1	0.213018	0.704142	0.0828402	0.302521	0.117647	0.388889	0.270677	2.38	0.0903226	169					CASC1	0.213018	0.704142	0.0828402	CASC1	0.213018	0.704142	0.0828402					CASC1	0.302521	0.117647	0.388889					CASC1	0.302521	0.117647	0.388889					CASC1	0.270677	2.38	0.0903226
MIOS	0.213018	0.704142	0.0828402	0.302521	0.117647	0.388889	0.270677	2.38	0.0903226	169					MIOS	0.213018	0.704142	0.0828402	MIOS	0.213018	0.704142	0.0828402					MIOS	0.302521	0.117647	0.388889					MIOS	0.302521	0.117647	0.388889					MIOS	0.270677	2.38	0.0903226
SERPINA4	0.343195	0.573964	0.0828402	0.597938	0.14433	0.241379	0.522523	1.34722	0.0903226	169					SERPINA4	0.343195	0.573964	0.0828402					SERPINA4	0.343195	0.573964	0.0828402					SERPINA4	0.597938	0.14433	0.241379					SERPINA4	0.597938	0.241379	0.241379					SERPINA4	0.522523	1.34722
MACF1	0.184848	0.732323	0.0828283	0.252414	0.113103	0.448087	0.226766	2.73585	0.0903084	990					MACF1	0.184848	0.732323	0.0828283	MACF1	0.184848	0.732323	0.0828283					MACF1	0.252414	0.113103	0.448087					MACF1	0.252414	0.113103	0.448087					MACF1	0.226766	2.73585	0.0903084
CEP152	0.199387	0.717791	0.0828221	0.277778	0.115385	0.415385	0.249042	2.54348	0.090301	326					CEP152	0.199387	0.717791	0.0828221	CEP152	0.199387	0.717791	0.0828221					CEP152	0.277778	0.115385	0.415385					CEP152	0.277778	0.115385	0.415385					CEP152	0.249042	2.54348	0.090301
CPEB2	0.165517	0.751724	0.0827586	0.220183	0.110092	0.5	0.198347	3.02778	0.0902256	145					CPEB2	0.165517	0.751724	0.0827586	CPEB2	0.165517	0.751724	0.0827586									CPEB2	0.220183	0.110092	0.5	CPEB2	0.220183	0.110092	0.5									CPEB2	0.198347	3.02778
ETS1_ENST00000392668	0.275862	0.641379	0.0827586	0.430108	0.129032	0.3	0.380952	1.78846	0.0902256	145					ETS1_ENST00000392668	0.275862	0.641379	0.0827586	ETS1_ENST00000392668	0.275862	0.641379	0.0827586									ETS1_ENST00000392668	0.430108	0.129032	0.3	ETS1_ENST00000392668	0.430108	0.129032	0.3					ETS1_ENST00000392668	0.380952	1.78846	0.0902256
MLL_ENST00000534358	0.134342	0.782918	0.0827402	0.171591	0.105682	0.615894	0.15519	3.60656	0.0902037	1124					MLL_ENST00000534358	0.134342	0.782918	0.0827402	MLL_ENST00000534358	0.134342	0.782918	0.0827402									MLL_ENST00000534358	0.171591	0.105682	0.615894	MLL_ENST00000534358	0.171591	0.105682	0.615894									MLL_ENST00000534358	0.15519	3.60656
LRBA	0.209559	0.707721	0.0827206	0.296104	0.116883	0.394737	0.265116	2.42138	0.0901804	544					LRBA	0.209559	0.707721	0.0827206	LRBA	0.209559	0.707721	0.0827206					LRBA	0.296104	0.116883	0.394737					LRBA	0.296104	0.116883	0.394737					LRBA	0.265116	2.42138	0.0901804
INTS4	0.165414	0.75188	0.0827068	0.22	0.11	0.5	0.198198	3.0303	0.0901639	133					INTS4	0.165414	0.75188	0.0827068	INTS4	0.165414	0.75188	0.0827068									INTS4	0.22	0.11	0.5	INTS4	0.22	0.11	0.5									INTS4	0.198198	3.0303
PUS7	0.165414	0.75188	0.0827068	0.22	0.11	0.5	0.198198	3.0303	0.0901639	133					PUS7	0.165414	0.75188	0.0827068	PUS7	0.165414	0.75188	0.0827068									PUS7	0.22	0.11	0.5	PUS7	0.22	0.11	0.5									PUS7	0.198198	3.0303
LIN9	0.18797	0.729323	0.0827068	0.257732	0.113402	0.44	0.231481	2.69444	0.0901639	133					LIN9	0.18797	0.729323	0.0827068	LIN9	0.18797	0.729323	0.0827068					LIN9	0.257732	0.113402	0.44					LIN9	0.257732	0.113402	0.44					LIN9	0.231481	2.69444	0.0901639
TAP1	0.225564	0.691729	0.0827068	0.326087	0.119565	0.366667	0.291262	2.2439	0.0901639	133					TAP1	0.225564	0.691729	0.0827068	TAP1	0.225564	0.691729	0.0827068					TAP1	0.326087	0.119565	0.366667					TAP1	0.326087	0.119565	0.366667					TAP1	0.291262	2.2439	0.0901639
ABCB4	0.234667	0.682667	0.0826667	0.34375	0.121094	0.352273	0.30662	2.15126	0.0901163	375					ABCB4	0.234667	0.682667	0.0826667	ABCB4	0.234667	0.682667	0.0826667					ABCB4	0.34375	0.121094	0.352273					ABCB4	0.34375	0.121094	0.352273					ABCB4	0.30662	2.15126	0.0901163
ANGPTL2	0.363636	0.553719	0.0826446	0.656716	0.149254	0.227273	0.571429	1.24074	0.0900901	121					ANGPTL2	0.363636	0.553719	0.0826446					ANGPTL2	0.363636	0.553719	0.0826446					ANGPTL2	0.656716	0.149254	0.227273					ANGPTL2	0.656716	0.227273	0.227273					ANGPTL2	0.571429	1.24074
CALR	0.214876	0.702479	0.0826446	0.305882	0.117647	0.384615	0.273684	2.36111	0.0900901	121					CALR	0.214876	0.702479	0.0826446	CALR	0.214876	0.702479	0.0826446					CALR	0.305882	0.117647	0.384615					CALR	0.305882	0.117647	0.384615					CALR	0.273684	2.36111	0.0900901
FIP1L1_ENST00000358575	0.190083	0.727273	0.0826446	0.261364	0.113636	0.434783	0.234694	2.66667	0.0900901	121					FIP1L1_ENST00000358575	0.190083	0.727273	0.0826446	FIP1L1_ENST00000358575	0.190083	0.727273	0.0826446					FIP1L1_ENST00000358575	0.261364	0.113636	0.434783					FIP1L1_ENST00000358575	0.261364	0.113636	0.434783					FIP1L1_ENST00000358575	0.234694	2.66667	0.0900901
PON1	0.157025	0.760331	0.0826446	0.206522	0.108696	0.526316	0.186275	3.17241	0.0900901	121					PON1	0.157025	0.760331	0.0826446	PON1	0.157025	0.760331	0.0826446									PON1	0.206522	0.108696	0.526316	PON1	0.206522	0.108696	0.526316									PON1	0.186275	3.17241
Q86U89_HUMAN	0.194215	0.72314	0.0826446	0.268571	0.114286	0.425532	0.241026	2.61194	0.0900901	242					Q86U89_HUMAN	0.194215	0.72314	0.0826446	Q86U89_HUMAN	0.194215	0.72314	0.0826446					Q86U89_HUMAN	0.268571	0.114286	0.425532					Q86U89_HUMAN	0.268571	0.114286	0.425532					Q86U89_HUMAN	0.241026	2.61194	0.0900901
WDR52_ENST00000393845	0.14876	0.768595	0.0826446	0.193548	0.107527	0.555556	0.174757	3.32143	0.0900901	121					WDR52_ENST00000393845	0.14876	0.768595	0.0826446	WDR52_ENST00000393845	0.14876	0.768595	0.0826446									WDR52_ENST00000393845	0.193548	0.107527	0.555556	WDR52_ENST00000393845	0.193548	0.107527	0.555556									WDR52_ENST00000393845	0.174757	3.32143
OTC	0.174312	0.743119	0.0825688	0.234568	0.111111	0.473684	0.211111	2.89286	0.09	109					OTC	0.174312	0.743119	0.0825688	OTC	0.174312	0.743119	0.0825688									OTC	0.234568	0.111111	0.473684	OTC	0.234568	0.111111	0.473684									OTC	0.211111	2.89286
AIM2	0.137615	0.779817	0.0825688	0.176471	0.105882	0.6	0.159574	3.54167	0.09	109					AIM2	0.137615	0.779817	0.0825688	AIM2	0.137615	0.779817	0.0825688									AIM2	0.176471	0.105882	0.6	AIM2	0.176471	0.105882	0.6									AIM2	0.159574	3.54167
C17orf80	0.183486	0.733945	0.0825688	0.25	0.1125	0.45	0.224719	2.75862	0.09	109					C17orf80	0.183486	0.733945	0.0825688	C17orf80	0.183486	0.733945	0.0825688					C17orf80	0.25	0.1125	0.45					C17orf80	0.25	0.1125	0.45					C17orf80	0.224719	2.75862	0.09
CNOT6	0.165138	0.752294	0.0825688	0.219512	0.109756	0.5	0.197802	3.03704	0.09	109					CNOT6	0.165138	0.752294	0.0825688	CNOT6	0.165138	0.752294	0.0825688									CNOT6	0.219512	0.109756	0.5	CNOT6	0.219512	0.109756	0.5									CNOT6	0.197802	3.03704
G3BP1	0.201835	0.715596	0.0825688	0.282051	0.115385	0.409091	0.252874	2.51613	0.09	109					G3BP1	0.201835	0.715596	0.0825688	G3BP1	0.201835	0.715596	0.0825688					G3BP1	0.282051	0.115385	0.409091					G3BP1	0.282051	0.115385	0.409091					G3BP1	0.252874	2.51613	0.09
GCLC	0.229358	0.688073	0.0825688	0.333333	0.12	0.36	0.297619	2.20588	0.09	109					GCLC	0.229358	0.688073	0.0825688	GCLC	0.229358	0.688073	0.0825688					GCLC	0.333333	0.12	0.36					GCLC	0.333333	0.12	0.36					GCLC	0.297619	2.20588	0.09
TMEM131	0.201835	0.715596	0.0825688	0.282051	0.115385	0.409091	0.252874	2.51613	0.09	327					TMEM131	0.201835	0.715596	0.0825688	TMEM131	0.201835	0.715596	0.0825688					TMEM131	0.282051	0.115385	0.409091					TMEM131	0.282051	0.115385	0.409091					TMEM131	0.252874	2.51613	0.09
GDPD2_ENST00000453994	0.256881	0.66055	0.0825688	0.388889	0.125	0.321429	0.345679	1.94595	0.09	109					GDPD2_ENST00000453994	0.256881	0.66055	0.0825688	GDPD2_ENST00000453994	0.256881	0.66055	0.0825688									GDPD2_ENST00000453994	0.388889	0.125	0.321429	GDPD2_ENST00000453994	0.388889	0.125	0.321429					GDPD2_ENST00000453994	0.345679	1.94595	0.09
MAP2	0.217172	0.700337	0.0824916	0.310096	0.117788	0.379845	0.277419	2.33708	0.0899083	594					MAP2	0.217172	0.700337	0.0824916	MAP2	0.217172	0.700337	0.0824916					MAP2	0.310096	0.117788	0.379845					MAP2	0.310096	0.117788	0.379845					MAP2	0.277419	2.33708	0.0899083
HDC	0.252577	0.664948	0.0824742	0.379845	0.124031	0.326531	0.337931	1.98462	0.0898876	194					HDC	0.252577	0.664948	0.0824742	HDC	0.252577	0.664948	0.0824742									HDC	0.379845	0.124031	0.326531	HDC	0.379845	0.124031	0.326531					HDC	0.337931	1.98462	0.0898876
KMT2A	0.13488	0.782646	0.0824742	0.172338	0.105379	0.611465	0.155909	3.60079	0.0898876	1164					KMT2A	0.13488	0.782646	0.0824742	KMT2A	0.13488	0.782646	0.0824742									KMT2A	0.172338	0.105379	0.611465	KMT2A	0.172338	0.105379	0.611465									KMT2A	0.155909	3.60079
SOS2_ENST00000216373	0.157706	0.759857	0.0824373	0.207547	0.108491	0.522727	0.187234	3.16418	0.0898438	279					SOS2_ENST00000216373	0.157706	0.759857	0.0824373	SOS2_ENST00000216373	0.157706	0.759857	0.0824373									SOS2_ENST00000216373	0.207547	0.108491	0.522727	SOS2_ENST00000216373	0.207547	0.108491	0.522727									SOS2_ENST00000216373	0.187234	3.16418
C1orf9_ENST00000367723	0.142322	0.775281	0.082397	0.183575	0.10628	0.578947	0.165939	3.45	0.0897959	267					C1orf9_ENST00000367723	0.142322	0.775281	0.082397	C1orf9_ENST00000367723	0.142322	0.775281	0.082397									C1orf9_ENST00000367723	0.183575	0.10628	0.578947	C1orf9_ENST00000367723	0.183575	0.10628	0.578947									C1orf9_ENST00000367723	0.165939	3.45
MAN1A1	0.158824	0.758824	0.0823529	0.209302	0.108527	0.518519	0.188811	3.14634	0.0897436	170					MAN1A1	0.158824	0.758824	0.0823529	MAN1A1	0.158824	0.758824	0.0823529									MAN1A1	0.209302	0.108527	0.518519	MAN1A1	0.209302	0.108527	0.518519									MAN1A1	0.188811	3.14634
CASC5	0.176829	0.740854	0.0823171	0.238683	0.111111	0.465517	0.214815	2.85882	0.089701	328					CASC5	0.176829	0.740854	0.0823171	CASC5	0.176829	0.740854	0.0823171					CASC5	0.238683	0.111111	0.465517					CASC5	0.238683	0.111111	0.465517									CASC5	0.214815	2.85882
SMARCA4_ENST00000358026	0.116367	0.801325	0.0823084	0.145218	0.102715	0.707317	0.131692	4.03333	0.0896907	1057					SMARCA4_ENST00000358026	0.116367	0.801325	0.0823084					SMARCA4_ENST00000358026	0.116367	0.801325	0.0823084					SMARCA4_ENST00000358026	0.145218	0.102715	0.707317	SMARCA4_ENST00000358026	0.145218	0.102715	0.707317									SMARCA4_ENST00000358026	0.131692	4.03333
PEX5L	0.213992	0.703704	0.0823045	0.304094	0.116959	0.384615	0.272251	2.375	0.0896861	243					PEX5L	0.213992	0.703704	0.0823045	PEX5L	0.213992	0.703704	0.0823045					PEX5L	0.304094	0.116959	0.384615					PEX5L	0.304094	0.116959	0.384615					PEX5L	0.272251	2.375	0.0896861
ADAMTS20_ENST00000553158	0.212903	0.704839	0.0822581	0.302059	0.116705	0.386364	0.270492	2.38798	0.0896309	620					ADAMTS20_ENST00000553158	0.212903	0.704839	0.0822581	ADAMTS20_ENST00000553158	0.212903	0.704839	0.0822581					ADAMTS20_ENST00000553158	0.302059	0.116705	0.386364					ADAMTS20_ENST00000553158	0.302059	0.116705	0.386364					ADAMTS20_ENST00000553158	0.270492	2.38798	0.0896309
ZNF337	0.260274	0.657534	0.0821918	0.395833	0.125	0.315789	0.351852	1.92	0.0895522	146					ZNF337	0.260274	0.657534	0.0821918	ZNF337	0.260274	0.657534	0.0821918									ZNF337	0.395833	0.125	0.315789	ZNF337	0.395833	0.125	0.315789					ZNF337	0.351852	1.92	0.0895522
C11orf82	0.19863	0.719178	0.0821918	0.27619	0.114286	0.413793	0.247863	2.56098	0.0895522	146					C11orf82	0.19863	0.719178	0.0821918	C11orf82	0.19863	0.719178	0.0821918					C11orf82	0.27619	0.114286	0.413793					C11orf82	0.27619	0.114286	0.413793					C11orf82	0.247863	2.56098	0.0895522
MSH5_ENST00000375703	0.267123	0.650685	0.0821918	0.410526	0.126316	0.307692	0.364486	1.86275	0.0895522	146					MSH5_ENST00000375703	0.267123	0.650685	0.0821918	MSH5_ENST00000375703	0.267123	0.650685	0.0821918									MSH5_ENST00000375703	0.410526	0.126316	0.307692	MSH5_ENST00000375703	0.410526	0.126316	0.307692					MSH5_ENST00000375703	0.364486	1.86275	0.0895522
PFKFB1	0.239726	0.678082	0.0821918	0.353535	0.121212	0.342857	0.315315	2.10638	0.0895522	146					PFKFB1	0.239726	0.678082	0.0821918	PFKFB1	0.239726	0.678082	0.0821918					PFKFB1	0.353535	0.121212	0.342857					PFKFB1	0.353535	0.121212	0.342857					PFKFB1	0.315315	2.10638	0.0895522
POT1	0.108209	0.809701	0.0820896	0.133641	0.101382	0.758621	0.121339	4.2549	0.0894309	268					POT1	0.108209	0.809701	0.0820896					POT1	0.108209	0.809701	0.0820896					POT1	0.133641	0.101382	0.758621	POT1	0.133641	0.101382	0.758621									POT1	0.121339	4.2549
STEAP4	0.201493	0.716418	0.0820896	0.28125	0.114583	0.407407	0.252336	2.52632	0.0894309	134					STEAP4	0.201493	0.716418	0.0820896	STEAP4	0.201493	0.716418	0.0820896					STEAP4	0.28125	0.114583	0.407407					STEAP4	0.28125	0.114583	0.407407					STEAP4	0.252336	2.52632	0.0894309
DYM	0.216418	0.701493	0.0820896	0.308511	0.117021	0.37931	0.27619	2.35	0.0894309	134					DYM	0.216418	0.701493	0.0820896	DYM	0.216418	0.701493	0.0820896					DYM	0.308511	0.117021	0.37931					DYM	0.308511	0.117021	0.37931					DYM	0.27619	2.35	0.0894309
EED	0.104478	0.813433	0.0820896	0.12844	0.100917	0.785714	0.116667	4.36	0.0894309	134					EED	0.104478	0.813433	0.0820896					EED	0.104478	0.813433	0.0820896					EED	0.12844	0.100917	0.785714	EED	0.12844	0.100917	0.785714									EED	0.116667	4.36
HKR1	0.30597	0.61194	0.0820896	0.5	0.134146	0.268293	0.44086	1.57692	0.0894309	134					HKR1	0.30597	0.61194	0.0820896	HKR1	0.30597	0.61194	0.0820896									HKR1	0.5	0.134146	0.268293	HKR1	0.5	0.134146	0.268293					HKR1	0.44086	1.57692	0.0894309
NFIA	0.156716	0.761194	0.0820896	0.205882	0.107843	0.52381	0.185841	3.1875	0.0894309	134					NFIA	0.156716	0.761194	0.0820896	NFIA	0.156716	0.761194	0.0820896									NFIA	0.205882	0.107843	0.52381	NFIA	0.205882	0.107843	0.52381									NFIA	0.185841	3.1875
TC2N	0.276119	0.641791	0.0820896	0.430233	0.127907	0.297297	0.381443	1.79167	0.0894309	134					TC2N	0.276119	0.641791	0.0820896	TC2N	0.276119	0.641791	0.0820896									TC2N	0.430233	0.127907	0.297297	TC2N	0.430233	0.127907	0.297297					TC2N	0.381443	1.79167	0.0894309
NUP210L	0.209503	0.708423	0.0820734	0.295732	0.115854	0.391753	0.265027	2.42963	0.0894118	463					NUP210L	0.209503	0.708423	0.0820734	NUP210L	0.209503	0.708423	0.0820734					NUP210L	0.295732	0.115854	0.391753					NUP210L	0.295732	0.115854	0.391753					NUP210L	0.265027	2.42963	0.0894118
SLC9A9	0.174359	0.74359	0.0820513	0.234483	0.110345	0.470588	0.21118	2.9	0.0893855	195					SLC9A9	0.174359	0.74359	0.0820513	SLC9A9	0.174359	0.74359	0.0820513									SLC9A9	0.234483	0.110345	0.470588	SLC9A9	0.234483	0.110345	0.470588									SLC9A9	0.21118	2.9
TJP1	0.248718	0.669231	0.0820513	0.371648	0.122605	0.329897	0.331058	2.02326	0.0893855	390					TJP1	0.248718	0.669231	0.0820513	TJP1	0.248718	0.669231	0.0820513					TJP1	0.371648	0.122605	0.329897					TJP1	0.371648	0.122605	0.329897					TJP1	0.331058	2.02326	0.0893855
NELL2_ENST00000395487	0.170347	0.747634	0.0820189	0.227848	0.109705	0.481481	0.205323	2.9625	0.0893471	317					NELL2_ENST00000395487	0.170347	0.747634	0.0820189	NELL2_ENST00000395487	0.170347	0.747634	0.0820189									NELL2_ENST00000395487	0.227848	0.109705	0.481481	NELL2_ENST00000395487	0.227848	0.109705	0.481481									NELL2_ENST00000395487	0.205323	2.9625
GTF3C2	0.234973	0.68306	0.0819672	0.344	0.12	0.348837	0.307143	2.15517	0.0892857	183					GTF3C2	0.234973	0.68306	0.0819672	GTF3C2	0.234973	0.68306	0.0819672					GTF3C2	0.344	0.12	0.348837					GTF3C2	0.344	0.12	0.348837					GTF3C2	0.307143	2.15517	0.0892857
KIAA0746	0.25	0.668033	0.0819672	0.374233	0.122699	0.327869	0.333333	2.01235	0.0892857	244					KIAA0746	0.25	0.668033	0.0819672	KIAA0746	0.25	0.668033	0.0819672					KIAA0746	0.374233	0.122699	0.327869					KIAA0746	0.374233	0.122699	0.327869					KIAA0746	0.333333	2.01235	0.0892857
LARP4	0.163934	0.754098	0.0819672	0.217391	0.108696	0.5	0.196078	3.06667	0.0892857	183					LARP4	0.163934	0.754098	0.0819672	LARP4	0.163934	0.754098	0.0819672									LARP4	0.217391	0.108696	0.5	LARP4	0.217391	0.108696	0.5									LARP4	0.196078	3.06667
RARB	0.213115	0.704918	0.0819672	0.302326	0.116279	0.384615	0.270833	2.38889	0.0892857	122					RARB	0.213115	0.704918	0.0819672	RARB	0.213115	0.704918	0.0819672					RARB	0.302326	0.116279	0.384615					RARB	0.302326	0.116279	0.384615					RARB	0.270833	2.38889	0.0892857
RNF180	0.196721	0.721311	0.0819672	0.272727	0.113636	0.416667	0.244898	2.58824	0.0892857	122					RNF180	0.196721	0.721311	0.0819672	RNF180	0.196721	0.721311	0.0819672					RNF180	0.272727	0.113636	0.416667					RNF180	0.272727	0.113636	0.416667					RNF180	0.244898	2.58824	0.0892857
NETO1	0.177474	0.740614	0.0819113	0.239631	0.110599	0.461538	0.215768	2.85526	0.0892193	293					NETO1	0.177474	0.740614	0.0819113	NETO1	0.177474	0.740614	0.0819113					NETO1	0.239631	0.110599	0.461538					NETO1	0.239631	0.110599	0.461538									NETO1	0.215768	2.85526
SELP	0.211604	0.706485	0.0819113	0.299517	0.115942	0.387097	0.268398	2.40698	0.0892193	293					SELP	0.211604	0.706485	0.0819113	SELP	0.211604	0.706485	0.0819113					SELP	0.299517	0.115942	0.387097					SELP	0.299517	0.115942	0.387097					SELP	0.268398	2.40698	0.0892193
UACA_ENST00000322954	0.181034	0.737069	0.0818966	0.245614	0.111111	0.452381	0.221053	2.80328	0.0892019	232					UACA_ENST00000322954	0.181034	0.737069	0.0818966	UACA_ENST00000322954	0.181034	0.737069	0.0818966					UACA_ENST00000322954	0.245614	0.111111	0.452381					UACA_ENST00000322954	0.245614	0.111111	0.452381					UACA_ENST00000322954	0.221053	2.80328	0.0892019
PHC3_ENST00000495893	0.233918	0.684211	0.0818713	0.34188	0.119658	0.35	0.305344	2.16667	0.089172	171					PHC3_ENST00000495893	0.233918	0.684211	0.0818713	PHC3_ENST00000495893	0.233918	0.684211	0.0818713					PHC3_ENST00000495893	0.34188	0.119658	0.35					PHC3_ENST00000495893	0.34188	0.119658	0.35					PHC3_ENST00000495893	0.305344	2.16667	0.089172
ACTR8	0.245455	0.672727	0.0818182	0.364865	0.121622	0.333333	0.325301	2.05556	0.0891089	110					ACTR8	0.245455	0.672727	0.0818182	ACTR8	0.245455	0.672727	0.0818182					ACTR8	0.364865	0.121622	0.333333					ACTR8	0.364865	0.121622	0.333333					ACTR8	0.325301	2.05556	0.0891089
GNB1L	0.263636	0.654545	0.0818182	0.402778	0.125	0.310345	0.358025	1.89474	0.0891089	110					GNB1L	0.263636	0.654545	0.0818182	GNB1L	0.263636	0.654545	0.0818182									GNB1L	0.402778	0.125	0.310345	GNB1L	0.402778	0.125	0.310345					GNB1L	0.358025	1.89474	0.0891089
HTR1F	0.227273	0.690909	0.0818182	0.328947	0.118421	0.36	0.294118	2.23529	0.0891089	110					HTR1F	0.227273	0.690909	0.0818182	HTR1F	0.227273	0.690909	0.0818182					HTR1F	0.328947	0.118421	0.36					HTR1F	0.328947	0.118421	0.36					HTR1F	0.294118	2.23529	0.0891089
VEGFA	0.127273	0.790909	0.0818182	0.16092	0.103448	0.642857	0.145833	3.78261	0.0891089	110					VEGFA	0.127273	0.790909	0.0818182	VEGFA	0.127273	0.790909	0.0818182									VEGFA	0.16092	0.103448	0.642857	VEGFA	0.16092	0.103448	0.642857									VEGFA	0.145833	3.78261
ARHGEF6	0.190909	0.727273	0.0818182	0.2625	0.1125	0.428571	0.235955	2.66667	0.0891089	220					ARHGEF6	0.190909	0.727273	0.0818182	ARHGEF6	0.190909	0.727273	0.0818182					ARHGEF6	0.2625	0.1125	0.428571					ARHGEF6	0.2625	0.1125	0.428571					ARHGEF6	0.235955	2.66667	0.0891089
CRNN	0.254545	0.663636	0.0818182	0.383562	0.123288	0.321429	0.341463	1.97297	0.0891089	220					CRNN	0.254545	0.663636	0.0818182	CRNN	0.254545	0.663636	0.0818182					CRNN	0.383562	0.123288	0.321429					CRNN	0.383562	0.123288	0.321429					CRNN	0.341463	1.97297	0.0891089
MCMBP	0.154545	0.763636	0.0818182	0.202381	0.107143	0.529412	0.182796	3.23077	0.0891089	110					MCMBP	0.154545	0.763636	0.0818182	MCMBP	0.154545	0.763636	0.0818182									MCMBP	0.202381	0.107143	0.529412	MCMBP	0.202381	0.107143	0.529412									MCMBP	0.182796	3.23077
PPIP5K1_ENST00000348806	0.254545	0.663636	0.0818182	0.383562	0.123288	0.321429	0.341463	1.97297	0.0891089	110					PPIP5K1_ENST00000348806	0.254545	0.663636	0.0818182	PPIP5K1_ENST00000348806	0.254545	0.663636	0.0818182					PPIP5K1_ENST00000348806	0.383562	0.123288	0.321429					PPIP5K1_ENST00000348806	0.383562	0.123288	0.321429					PPIP5K1_ENST00000348806	0.341463	1.97297	0.0891089
MTA2	0.220126	0.698113	0.081761	0.315315	0.117117	0.371429	0.282258	2.3125	0.0890411	159					MTA2	0.220126	0.698113	0.081761	MTA2	0.220126	0.698113	0.081761					MTA2	0.315315	0.117117	0.371429					MTA2	0.315315	0.117117	0.371429					MTA2	0.282258	2.3125	0.0890411
TDRD5_ENST00000444136	0.264151	0.654088	0.081761	0.403846	0.125	0.309524	0.358974	1.89091	0.0890411	318					TDRD5_ENST00000444136	0.264151	0.654088	0.081761	TDRD5_ENST00000444136	0.264151	0.654088	0.081761									TDRD5_ENST00000444136	0.403846	0.125	0.309524	TDRD5_ENST00000444136	0.403846	0.125	0.309524					TDRD5_ENST00000444136	0.358974	1.89091	0.0890411
KIAA0196	0.225962	0.692308	0.0817308	0.326389	0.118056	0.361702	0.291925	2.25	0.0890052	208					KIAA0196	0.225962	0.692308	0.0817308	KIAA0196	0.225962	0.692308	0.0817308					KIAA0196	0.326389	0.118056	0.361702					KIAA0196	0.326389	0.118056	0.361702					KIAA0196	0.291925	2.25	0.0890052
ARHGAP21_ENST00000320481	0.22449	0.693878	0.0816327	0.323529	0.117647	0.363636	0.289474	2.26667	0.0888889	196					ARHGAP21_ENST00000320481	0.22449	0.693878	0.0816327	ARHGAP21_ENST00000320481	0.22449	0.693878	0.0816327					ARHGAP21_ENST00000320481	0.323529	0.117647	0.363636					ARHGAP21_ENST00000320481	0.323529	0.117647	0.363636					ARHGAP21_ENST00000320481	0.289474	2.26667	0.0888889
FAM13A_ENST00000508369	0.217687	0.70068	0.0816327	0.31068	0.116505	0.375	0.278261	2.34091	0.0888889	147					FAM13A_ENST00000508369	0.217687	0.70068	0.0816327	FAM13A_ENST00000508369	0.217687	0.70068	0.0816327					FAM13A_ENST00000508369	0.31068	0.116505	0.375					FAM13A_ENST00000508369	0.31068	0.116505	0.375					FAM13A_ENST00000508369	0.278261	2.34091	0.0888889
INPP5J	0.231293	0.687075	0.0816327	0.336634	0.118812	0.352941	0.300885	2.19565	0.0888889	147					INPP5J	0.231293	0.687075	0.0816327	INPP5J	0.231293	0.687075	0.0816327					INPP5J	0.336634	0.118812	0.352941					INPP5J	0.336634	0.118812	0.352941					INPP5J	0.300885	2.19565	0.0888889
PARP8	0.240816	0.677551	0.0816327	0.355422	0.120482	0.338983	0.317204	2.10127	0.0888889	245					PARP8	0.240816	0.677551	0.0816327	PARP8	0.240816	0.677551	0.0816327					PARP8	0.355422	0.120482	0.338983					PARP8	0.355422	0.120482	0.338983					PARP8	0.317204	2.10127	0.0888889
DYNC2H1	0.229592	0.688776	0.0816327	0.333333	0.118519	0.355556	0.298013	2.21311	0.0888889	196					DYNC2H1	0.229592	0.688776	0.0816327	DYNC2H1	0.229592	0.688776	0.0816327					DYNC2H1	0.333333	0.118519	0.355556					DYNC2H1	0.333333	0.118519	0.355556					DYNC2H1	0.298013	2.21311	0.0888889
R3HDM2_ENST00000441731	0.265306	0.653061	0.0816327	0.40625	0.125	0.307692	0.361111	1.88235	0.0888889	147					R3HDM2_ENST00000441731	0.265306	0.653061	0.0816327	R3HDM2_ENST00000441731	0.265306	0.653061	0.0816327									R3HDM2_ENST00000441731	0.40625	0.125	0.307692	R3HDM2_ENST00000441731	0.40625	0.125	0.307692					R3HDM2_ENST00000441731	0.361111	1.88235	0.0888889
XPO5	0.222826	0.695652	0.0815217	0.320312	0.117188	0.365854	0.286713	2.28571	0.0887574	184					XPO5	0.222826	0.695652	0.0815217	XPO5	0.222826	0.695652	0.0815217					XPO5	0.320312	0.117188	0.365854					XPO5	0.320312	0.117188	0.365854					XPO5	0.286713	2.28571	0.0887574
TMEM67_ENST00000453321	0.23913	0.679348	0.0815217	0.352	0.12	0.340909	0.314286	2.11864	0.0887574	184					TMEM67_ENST00000453321	0.23913	0.679348	0.0815217	TMEM67_ENST00000453321	0.23913	0.679348	0.0815217					TMEM67_ENST00000453321	0.352	0.12	0.340909					TMEM67_ENST00000453321	0.352	0.12	0.340909					TMEM67_ENST00000453321	0.314286	2.11864	0.0887574
KIAA0947_ENST00000296564	0.166998	0.751491	0.0815109	0.222222	0.108466	0.488095	0.200477	3.024	0.0887446	503					KIAA0947_ENST00000296564	0.166998	0.751491	0.0815109	KIAA0947_ENST00000296564	0.166998	0.751491	0.0815109									KIAA0947_ENST00000296564	0.222222	0.108466	0.488095	KIAA0947_ENST00000296564	0.222222	0.108466	0.488095									KIAA0947_ENST00000296564	0.200477	3.024
ARHGAP18	0.162963	0.755556	0.0814815	0.215686	0.107843	0.5	0.19469	3.09091	0.0887097	135					ARHGAP18	0.162963	0.755556	0.0814815	ARHGAP18	0.162963	0.755556	0.0814815									ARHGAP18	0.215686	0.107843	0.5	ARHGAP18	0.215686	0.107843	0.5									ARHGAP18	0.19469	3.09091
GAS7_ENST00000396115	0.214815	0.703704	0.0814815	0.305263	0.115789	0.37931	0.273585	2.375	0.0887097	135					GAS7_ENST00000396115	0.214815	0.703704	0.0814815	GAS7_ENST00000396115	0.214815	0.703704	0.0814815					GAS7_ENST00000396115	0.305263	0.115789	0.37931					GAS7_ENST00000396115	0.305263	0.115789	0.37931					GAS7_ENST00000396115	0.273585	2.375	0.0887097
KCNK1	0.340741	0.577778	0.0814815	0.589744	0.141026	0.23913	0.516854	1.36842	0.0887097	135					KCNK1	0.340741	0.577778	0.0814815					KCNK1	0.340741	0.577778	0.0814815					KCNK1	0.589744	0.141026	0.23913					KCNK1	0.589744	0.23913	0.23913					KCNK1	0.516854	1.36842
KHDRBS3	0.22963	0.688889	0.0814815	0.333333	0.11828	0.354839	0.298077	2.21429	0.0887097	135					KHDRBS3	0.22963	0.688889	0.0814815	KHDRBS3	0.22963	0.688889	0.0814815					KHDRBS3	0.333333	0.11828	0.354839					KHDRBS3	0.333333	0.11828	0.354839					KHDRBS3	0.298077	2.21429	0.0887097
SP1_ENST00000327443	0.259259	0.659259	0.0814815	0.393258	0.123596	0.314286	0.35	1.93478	0.0887097	135					SP1_ENST00000327443	0.259259	0.659259	0.0814815	SP1_ENST00000327443	0.259259	0.659259	0.0814815					SP1_ENST00000327443	0.393258	0.123596	0.314286					SP1_ENST00000327443	0.393258	0.123596	0.314286					SP1_ENST00000327443	0.35	1.93478	0.0887097
TAP2_ENST00000458336	0.266667	0.651852	0.0814815	0.409091	0.125	0.305556	0.363636	1.87234	0.0887097	135					TAP2_ENST00000458336	0.266667	0.651852	0.0814815	TAP2_ENST00000458336	0.266667	0.651852	0.0814815									TAP2_ENST00000458336	0.409091	0.125	0.305556	TAP2_ENST00000458336	0.409091	0.125	0.305556					TAP2_ENST00000458336	0.363636	1.87234	0.0887097
ARPP21_ENST00000458225	0.166124	0.752443	0.0814332	0.220779	0.108225	0.490196	0.199219	3.03947	0.0886525	307					ARPP21_ENST00000458225	0.166124	0.752443	0.0814332	ARPP21_ENST00000458225	0.166124	0.752443	0.0814332									ARPP21_ENST00000458225	0.220779	0.108225	0.490196	ARPP21_ENST00000458225	0.220779	0.108225	0.490196									ARPP21_ENST00000458225	0.199219	3.03947
CLIP1_ENST00000540338	0.260586	0.65798	0.0814332	0.39604	0.123762	0.3125	0.352423	1.92381	0.0886525	307					CLIP1_ENST00000540338	0.260586	0.65798	0.0814332	CLIP1_ENST00000540338	0.260586	0.65798	0.0814332					CLIP1_ENST00000540338	0.39604	0.123762	0.3125					CLIP1_ENST00000540338	0.39604	0.123762	0.3125					CLIP1_ENST00000540338	0.352423	1.92381	0.0886525
BIRC6	0.182672	0.735908	0.0814196	0.248227	0.110638	0.445714	0.223499	2.78656	0.0886364	958					BIRC6	0.182672	0.735908	0.0814196	BIRC6	0.182672	0.735908	0.0814196					BIRC6	0.248227	0.110638	0.445714					BIRC6	0.248227	0.110638	0.445714					BIRC6	0.223499	2.78656	0.0886364
GPAM	0.197674	0.72093	0.0813953	0.274194	0.112903	0.411765	0.246377	2.58333	0.0886076	172					GPAM	0.197674	0.72093	0.0813953	GPAM	0.197674	0.72093	0.0813953					GPAM	0.274194	0.112903	0.411765					GPAM	0.274194	0.112903	0.411765					GPAM	0.246377	2.58333	0.0886076
PHC3	0.25	0.668605	0.0813953	0.373913	0.121739	0.325581	0.333333	2.01754	0.0886076	172					PHC3	0.25	0.668605	0.0813953	PHC3	0.25	0.668605	0.0813953					PHC3	0.373913	0.121739	0.325581					PHC3	0.373913	0.121739	0.325581					PHC3	0.333333	2.01754	0.0886076
RASA2	0.145349	0.773256	0.0813953	0.18797	0.105263	0.56	0.170068	3.41026	0.0886076	172					RASA2	0.145349	0.773256	0.0813953	RASA2	0.145349	0.773256	0.0813953									RASA2	0.18797	0.105263	0.56	RASA2	0.18797	0.105263	0.56									RASA2	0.170068	3.41026
ZNF438_ENST00000452305	0.186603	0.732057	0.0813397	0.254902	0.111111	0.435897	0.229412	2.73214	0.0885417	209					ZNF438_ENST00000452305	0.186603	0.732057	0.0813397	ZNF438_ENST00000452305	0.186603	0.732057	0.0813397					ZNF438_ENST00000452305	0.254902	0.111111	0.435897					ZNF438_ENST00000452305	0.254902	0.111111	0.435897					ZNF438_ENST00000452305	0.229412	2.73214	0.0885417
PC_ENST00000355677	0.268293	0.650407	0.0813008	0.4125	0.125	0.30303	0.366667	1.86047	0.0884956	123					PC_ENST00000355677	0.268293	0.650407	0.0813008	PC_ENST00000355677	0.268293	0.650407	0.0813008									PC_ENST00000355677	0.4125	0.125	0.30303	PC_ENST00000355677	0.4125	0.125	0.30303					PC_ENST00000355677	0.366667	1.86047	0.0884956
RALGPS2	0.146341	0.772358	0.0813008	0.189474	0.105263	0.555556	0.171429	3.39286	0.0884956	123					RALGPS2	0.146341	0.772358	0.0813008	RALGPS2	0.146341	0.772358	0.0813008									RALGPS2	0.189474	0.105263	0.555556	RALGPS2	0.189474	0.105263	0.555556									RALGPS2	0.171429	3.39286
RELA	0.211382	0.707317	0.0813008	0.298851	0.114943	0.384615	0.268041	2.41667	0.0884956	123					RELA	0.211382	0.707317	0.0813008	RELA	0.211382	0.707317	0.0813008					RELA	0.298851	0.114943	0.384615					RELA	0.298851	0.114943	0.384615					RELA	0.268041	2.41667	0.0884956
WDR78_ENST00000371023	0.178862	0.739837	0.0813008	0.241758	0.10989	0.454545	0.217822	2.84375	0.0884956	123					WDR78_ENST00000371023	0.178862	0.739837	0.0813008	WDR78_ENST00000371023	0.178862	0.739837	0.0813008					WDR78_ENST00000371023	0.241758	0.10989	0.454545					WDR78_ENST00000371023	0.241758	0.10989	0.454545									WDR78_ENST00000371023	0.217822	2.84375
HIF1A	0.175	0.74375	0.08125	0.235294	0.109244	0.464286	0.212121	2.90244	0.0884354	160					HIF1A	0.175	0.74375	0.08125	HIF1A	0.175	0.74375	0.08125									HIF1A	0.235294	0.109244	0.464286	HIF1A	0.235294	0.109244	0.464286									HIF1A	0.212121	2.90244
PTK2B_ENST00000397497	0.21875	0.7	0.08125	0.3125	0.116071	0.371429	0.28	2.33333	0.0884354	160					PTK2B_ENST00000397497	0.21875	0.7	0.08125	PTK2B_ENST00000397497	0.21875	0.7	0.08125					PTK2B_ENST00000397497	0.3125	0.116071	0.371429					PTK2B_ENST00000397497	0.3125	0.116071	0.371429					PTK2B_ENST00000397497	0.28	2.33333	0.0884354
CASC5_ENST00000346991	0.179272	0.739496	0.0812325	0.242424	0.109848	0.453125	0.21843	2.83871	0.0884146	357					CASC5_ENST00000346991	0.179272	0.739496	0.0812325	CASC5_ENST00000346991	0.179272	0.739496	0.0812325					CASC5_ENST00000346991	0.242424	0.109848	0.453125					CASC5_ENST00000346991	0.242424	0.109848	0.453125									CASC5_ENST00000346991	0.21843	2.83871
AMOTL2	0.253807	0.664975	0.0812183	0.381679	0.122137	0.32	0.340136	1.98485	0.0883978	197					AMOTL2	0.253807	0.664975	0.0812183	AMOTL2	0.253807	0.664975	0.0812183					AMOTL2	0.381679	0.122137	0.32					AMOTL2	0.381679	0.122137	0.32					AMOTL2	0.340136	1.98485	0.0883978
MYO5A	0.175127	0.743655	0.0812183	0.235495	0.109215	0.463768	0.212308	2.90099	0.0883978	394					MYO5A	0.175127	0.743655	0.0812183	MYO5A	0.175127	0.743655	0.0812183					MYO5A	0.235495	0.109215	0.463768					MYO5A	0.235495	0.109215	0.463768									MYO5A	0.212308	2.90099
OXR1	0.22335	0.695431	0.0812183	0.321168	0.116788	0.363636	0.287582	2.28333	0.0883978	197					OXR1	0.22335	0.695431	0.0812183	OXR1	0.22335	0.695431	0.0812183					OXR1	0.321168	0.116788	0.363636					OXR1	0.321168	0.116788	0.363636					OXR1	0.287582	2.28333	0.0883978
PPFIBP1	0.263959	0.654822	0.0812183	0.403101	0.124031	0.307692	0.358621	1.89706	0.0883978	197					PPFIBP1	0.263959	0.654822	0.0812183	PPFIBP1	0.263959	0.654822	0.0812183									PPFIBP1	0.403101	0.124031	0.307692	PPFIBP1	0.403101	0.124031	0.307692					PPFIBP1	0.358621	1.89706	0.0883978
ZNF841	0.243655	0.675127	0.0812183	0.360902	0.120301	0.333333	0.322148	2.07812	0.0883978	197					ZNF841	0.243655	0.675127	0.0812183	ZNF841	0.243655	0.675127	0.0812183					ZNF841	0.360902	0.120301	0.333333					ZNF841	0.360902	0.120301	0.333333					ZNF841	0.322148	2.07812	0.0883978
ZNF841_ENST00000389534	0.243655	0.675127	0.0812183	0.360902	0.120301	0.333333	0.322148	2.07812	0.0883978	197					ZNF841_ENST00000389534	0.243655	0.675127	0.0812183	ZNF841_ENST00000389534	0.243655	0.675127	0.0812183					ZNF841_ENST00000389534	0.360902	0.120301	0.333333					ZNF841_ENST00000389534	0.360902	0.120301	0.333333					ZNF841_ENST00000389534	0.322148	2.07812	0.0883978
CPD	0.25641	0.662393	0.0811966	0.387097	0.122581	0.316667	0.344828	1.96203	0.0883721	234					CPD	0.25641	0.662393	0.0811966	CPD	0.25641	0.662393	0.0811966					CPD	0.387097	0.122581	0.316667					CPD	0.387097	0.122581	0.316667					CPD	0.344828	1.96203	0.0883721
FAM91A1	0.217949	0.700855	0.0811966	0.310976	0.115854	0.372549	0.278689	2.34286	0.0883721	234					FAM91A1	0.217949	0.700855	0.0811966	FAM91A1	0.217949	0.700855	0.0811966					FAM91A1	0.310976	0.115854	0.372549					FAM91A1	0.310976	0.115854	0.372549					FAM91A1	0.278689	2.34286	0.0883721
PUM1	0.239852	0.678967	0.0811808	0.353261	0.119565	0.338462	0.315534	2.11494	0.0883534	271					PUM1	0.239852	0.678967	0.0811808	PUM1	0.239852	0.678967	0.0811808					PUM1	0.353261	0.119565	0.338462					PUM1	0.353261	0.119565	0.338462					PUM1	0.315534	2.11494	0.0883534
FGF12_ENST00000445105	0.252252	0.666667	0.0810811	0.378378	0.121622	0.321429	0.337349	2	0.0882353	111					FGF12_ENST00000445105	0.252252	0.666667	0.0810811	FGF12_ENST00000445105	0.252252	0.666667	0.0810811					FGF12_ENST00000445105	0.378378	0.121622	0.321429					FGF12_ENST00000445105	0.378378	0.121622	0.321429					FGF12_ENST00000445105	0.337349	2	0.0882353
ZDHHC17	0.153153	0.765766	0.0810811	0.2	0.105882	0.529412	0.180851	3.26923	0.0882353	111					ZDHHC17	0.153153	0.765766	0.0810811	ZDHHC17	0.153153	0.765766	0.0810811									ZDHHC17	0.2	0.105882	0.529412	ZDHHC17	0.2	0.105882	0.529412									ZDHHC17	0.180851	3.26923
IL12RB1	0.369369	0.54955	0.0810811	0.672131	0.147541	0.219512	0.585714	1.22	0.0882353	111					IL12RB1	0.369369	0.54955	0.0810811					IL12RB1	0.369369	0.54955	0.0810811					IL12RB1	0.672131	0.147541	0.219512					IL12RB1	0.672131	0.219512	0.219512					IL12RB1	0.585714	1.22
DAZAP1	0.216216	0.702703	0.0810811	0.307692	0.115385	0.375	0.275862	2.36364	0.0882353	111					DAZAP1	0.216216	0.702703	0.0810811	DAZAP1	0.216216	0.702703	0.0810811					DAZAP1	0.307692	0.115385	0.375					DAZAP1	0.307692	0.115385	0.375					DAZAP1	0.275862	2.36364	0.0882353
GABBR1_ENST00000377012	0.18018	0.738739	0.0810811	0.243902	0.109756	0.45	0.21978	2.82759	0.0882353	111					GABBR1_ENST00000377012	0.18018	0.738739	0.0810811	GABBR1_ENST00000377012	0.18018	0.738739	0.0810811					GABBR1_ENST00000377012	0.243902	0.109756	0.45					GABBR1_ENST00000377012	0.243902	0.109756	0.45					GABBR1_ENST00000377012	0.21978	2.82759	0.0882353
MGEA5_ENST00000370094	0.162162	0.756757	0.0810811	0.214286	0.107143	0.5	0.193548	3.11111	0.0882353	111					MGEA5_ENST00000370094	0.162162	0.756757	0.0810811	MGEA5_ENST00000370094	0.162162	0.756757	0.0810811									MGEA5_ENST00000370094	0.214286	0.107143	0.5	MGEA5_ENST00000370094	0.214286	0.107143	0.5									MGEA5_ENST00000370094	0.193548	3.11111
OPRM1_ENST00000419506	0.324324	0.594595	0.0810811	0.545455	0.136364	0.25	0.48	1.46667	0.0882353	111					OPRM1_ENST00000419506	0.324324	0.594595	0.0810811					OPRM1_ENST00000419506	0.324324	0.594595	0.0810811					OPRM1_ENST00000419506	0.545455	0.136364	0.25	OPRM1_ENST00000419506	0.545455	0.136364	0.25									OPRM1_ENST00000419506	0.48	1.46667
FAM184A	0.158451	0.760563	0.0809859	0.208333	0.106481	0.511111	0.188285	3.17647	0.0881226	284					FAM184A	0.158451	0.760563	0.0809859	FAM184A	0.158451	0.760563	0.0809859									FAM184A	0.208333	0.106481	0.511111	FAM184A	0.208333	0.106481	0.511111									FAM184A	0.188285	3.17647
ACTN2_ENST00000542672	0.287449	0.631579	0.0809717	0.455128	0.128205	0.28169	0.403409	1.71429	0.0881057	247					ACTN2_ENST00000542672	0.287449	0.631579	0.0809717	ACTN2_ENST00000542672	0.287449	0.631579	0.0809717									ACTN2_ENST00000542672	0.455128	0.128205	0.28169	ACTN2_ENST00000542672	0.455128	0.128205	0.28169					ACTN2_ENST00000542672	0.403409	1.71429	0.0881057
ATRN	0.174089	0.744939	0.0809717	0.233696	0.108696	0.465116	0.210784	2.92063	0.0881057	247					ATRN	0.174089	0.744939	0.0809717	ATRN	0.174089	0.744939	0.0809717									ATRN	0.233696	0.108696	0.465116	ATRN	0.233696	0.108696	0.465116									ATRN	0.210784	2.92063
RPE65	0.190751	0.728324	0.0809249	0.261905	0.111111	0.424242	0.235714	2.68085	0.0880503	173					RPE65	0.190751	0.728324	0.0809249	RPE65	0.190751	0.728324	0.0809249					RPE65	0.261905	0.111111	0.424242					RPE65	0.261905	0.111111	0.424242					RPE65	0.235714	2.68085	0.0880503
GRIA4_ENST00000393125	0.231214	0.687861	0.0809249	0.336134	0.117647	0.35	0.300752	2.2037	0.0880503	173					GRIA4_ENST00000393125	0.231214	0.687861	0.0809249	GRIA4_ENST00000393125	0.231214	0.687861	0.0809249					GRIA4_ENST00000393125	0.336134	0.117647	0.35					GRIA4_ENST00000393125	0.336134	0.117647	0.35					GRIA4_ENST00000393125	0.300752	2.2037	0.0880503
TRAK2	0.213873	0.705202	0.0809249	0.303279	0.114754	0.378378	0.272059	2.39216	0.0880503	173					TRAK2	0.213873	0.705202	0.0809249	TRAK2	0.213873	0.705202	0.0809249					TRAK2	0.303279	0.114754	0.378378					TRAK2	0.303279	0.114754	0.378378					TRAK2	0.272059	2.39216	0.0880503
SHCBP1	0.220588	0.698529	0.0808824	0.315789	0.115789	0.366667	0.283019	2.31707	0.088	136					SHCBP1	0.220588	0.698529	0.0808824	SHCBP1	0.220588	0.698529	0.0808824					SHCBP1	0.315789	0.115789	0.366667					SHCBP1	0.315789	0.115789	0.366667					SHCBP1	0.283019	2.31707	0.088
ZNF582	0.191176	0.727941	0.0808824	0.262626	0.111111	0.423077	0.236364	2.67568	0.088	136					ZNF582	0.191176	0.727941	0.0808824	ZNF582	0.191176	0.727941	0.0808824					ZNF582	0.262626	0.111111	0.423077					ZNF582	0.262626	0.111111	0.423077					ZNF582	0.236364	2.67568	0.088
NUF2	0.242647	0.676471	0.0808824	0.358696	0.119565	0.333333	0.320388	2.09091	0.088	136					NUF2	0.242647	0.676471	0.0808824	NUF2	0.242647	0.676471	0.0808824					NUF2	0.358696	0.119565	0.333333					NUF2	0.358696	0.119565	0.333333					NUF2	0.320388	2.09091	0.088
ACTRT1	0.229787	0.689362	0.0808511	0.333333	0.117284	0.351852	0.298343	2.21918	0.087963	235					ACTRT1	0.229787	0.689362	0.0808511	ACTRT1	0.229787	0.689362	0.0808511					ACTRT1	0.333333	0.117284	0.351852					ACTRT1	0.333333	0.117284	0.351852					ACTRT1	0.298343	2.21918	0.087963
USP15	0.151515	0.767677	0.0808081	0.197368	0.105263	0.533333	0.178571	3.30435	0.0879121	198					USP15	0.151515	0.767677	0.0808081	USP15	0.151515	0.767677	0.0808081									USP15	0.197368	0.105263	0.533333	USP15	0.197368	0.105263	0.533333									USP15	0.178571	3.30435
RP1_ENST00000427058	0.217391	0.701863	0.0807453	0.309735	0.115044	0.371429	0.277778	2.35417	0.0878378	161					RP1_ENST00000427058	0.217391	0.701863	0.0807453	RP1_ENST00000427058	0.217391	0.701863	0.0807453					RP1_ENST00000427058	0.309735	0.115044	0.371429					RP1_ENST00000427058	0.309735	0.115044	0.371429					RP1_ENST00000427058	0.277778	2.35417	0.0878378
HAO2	0.236025	0.68323	0.0807453	0.345455	0.118182	0.342105	0.308943	2.15686	0.0878378	161					HAO2	0.236025	0.68323	0.0807453	HAO2	0.236025	0.68323	0.0807453					HAO2	0.345455	0.118182	0.342105					HAO2	0.345455	0.118182	0.342105					HAO2	0.308943	2.15686	0.0878378
XPO4	0.170404	0.748879	0.0807175	0.227545	0.107784	0.473684	0.205405	2.98214	0.0878049	223					XPO4	0.170404	0.748879	0.0807175	XPO4	0.170404	0.748879	0.0807175									XPO4	0.227545	0.107784	0.473684	XPO4	0.227545	0.107784	0.473684									XPO4	0.205405	2.98214
PCSK6_ENST00000331826	0.266129	0.653226	0.0806452	0.407407	0.123457	0.30303	0.362637	1.88372	0.0877193	124					PCSK6_ENST00000331826	0.266129	0.653226	0.0806452	PCSK6_ENST00000331826	0.266129	0.653226	0.0806452					PCSK6_ENST00000331826	0.407407	0.123457	0.30303					PCSK6_ENST00000331826	0.407407	0.123457	0.30303					PCSK6_ENST00000331826	0.362637	1.88372	0.0877193
DNM2	0.302419	0.616935	0.0806452	0.490196	0.130719	0.266667	0.433526	1.61053	0.0877193	248					DNM2	0.302419	0.616935	0.0806452	DNM2	0.302419	0.616935	0.0806452									DNM2	0.490196	0.130719	0.266667	DNM2	0.490196	0.130719	0.266667					DNM2	0.433526	1.61053	0.0877193
KLC4_ENST00000259708	0.145161	0.774194	0.0806452	0.1875	0.104167	0.555556	0.169811	3.42857	0.0877193	124					KLC4_ENST00000259708	0.145161	0.774194	0.0806452	KLC4_ENST00000259708	0.145161	0.774194	0.0806452									KLC4_ENST00000259708	0.1875	0.104167	0.555556	KLC4_ENST00000259708	0.1875	0.104167	0.555556									KLC4_ENST00000259708	0.169811	3.42857
SMTNL1	0.282258	0.637097	0.0806452	0.443038	0.126582	0.285714	0.393258	1.75556	0.0877193	124					SMTNL1	0.282258	0.637097	0.0806452	SMTNL1	0.282258	0.637097	0.0806452									SMTNL1	0.443038	0.126582	0.285714	SMTNL1	0.443038	0.126582	0.285714					SMTNL1	0.393258	1.75556	0.0877193
VN1R4	0.258065	0.66129	0.0806452	0.390244	0.121951	0.3125	0.347826	1.95238	0.0877193	124					VN1R4	0.258065	0.66129	0.0806452	VN1R4	0.258065	0.66129	0.0806452					VN1R4	0.390244	0.121951	0.3125					VN1R4	0.390244	0.121951	0.3125					VN1R4	0.347826	1.95238	0.0877193
ZNF554	0.25	0.669355	0.0806452	0.373494	0.120482	0.322581	0.333333	2.02439	0.0877193	124					ZNF554	0.25	0.669355	0.0806452	ZNF554	0.25	0.669355	0.0806452					ZNF554	0.373494	0.120482	0.322581					ZNF554	0.373494	0.120482	0.322581					ZNF554	0.333333	2.02439	0.0877193
OXR1_ENST00000442977	0.222749	0.696682	0.0805687	0.319728	0.115646	0.361702	0.286585	2.29688	0.0876289	211					OXR1_ENST00000442977	0.222749	0.696682	0.0805687	OXR1_ENST00000442977	0.222749	0.696682	0.0805687					OXR1_ENST00000442977	0.319728	0.115646	0.361702					OXR1_ENST00000442977	0.319728	0.115646	0.361702					OXR1_ENST00000442977	0.286585	2.29688	0.0876289
USP25_ENST00000400183	0.232227	0.687204	0.0805687	0.337931	0.117241	0.346939	0.302469	2.19697	0.0876289	211					USP25_ENST00000400183	0.232227	0.687204	0.0805687	USP25_ENST00000400183	0.232227	0.687204	0.0805687					USP25_ENST00000400183	0.337931	0.117241	0.346939					USP25_ENST00000400183	0.337931	0.117241	0.346939					USP25_ENST00000400183	0.302469	2.19697	0.0876289
EXOC2	0.241706	0.677725	0.0805687	0.356643	0.118881	0.333333	0.31875	2.10294	0.0876289	211					EXOC2	0.241706	0.677725	0.0805687	EXOC2	0.241706	0.677725	0.0805687					EXOC2	0.356643	0.118881	0.333333					EXOC2	0.356643	0.118881	0.333333					EXOC2	0.31875	2.10294	0.0876289
BFSP1	0.228188	0.691275	0.0805369	0.330097	0.116505	0.352941	0.295652	2.23913	0.0875912	149					BFSP1	0.228188	0.691275	0.0805369	BFSP1	0.228188	0.691275	0.0805369					BFSP1	0.330097	0.116505	0.352941					BFSP1	0.330097	0.116505	0.352941					BFSP1	0.295652	2.23913	0.0875912
CACNB4_ENST00000339254	0.208054	0.711409	0.0805369	0.292453	0.113208	0.387097	0.262712	2.46512	0.0875912	149					CACNB4_ENST00000339254	0.208054	0.711409	0.0805369	CACNB4_ENST00000339254	0.208054	0.711409	0.0805369					CACNB4_ENST00000339254	0.292453	0.113208	0.387097					CACNB4_ENST00000339254	0.292453	0.113208	0.387097					CACNB4_ENST00000339254	0.262712	2.46512	0.0875912
MYBL1	0.161074	0.758389	0.0805369	0.212389	0.106195	0.5	0.192	3.13889	0.0875912	149					MYBL1	0.161074	0.758389	0.0805369	MYBL1	0.161074	0.758389	0.0805369									MYBL1	0.212389	0.106195	0.5	MYBL1	0.212389	0.106195	0.5									MYBL1	0.192	3.13889
OR2J2	0.214765	0.704698	0.0805369	0.304762	0.114286	0.375	0.273504	2.38636	0.0875912	149					OR2J2	0.214765	0.704698	0.0805369	OR2J2	0.214765	0.704698	0.0805369					OR2J2	0.304762	0.114286	0.375					OR2J2	0.304762	0.114286	0.375					OR2J2	0.273504	2.38636	0.0875912
PSME4	0.211409	0.708054	0.0805369	0.298578	0.113744	0.380952	0.268085	2.42529	0.0875912	298					PSME4	0.211409	0.708054	0.0805369	PSME4	0.211409	0.708054	0.0805369					PSME4	0.298578	0.113744	0.380952					PSME4	0.298578	0.113744	0.380952					PSME4	0.268085	2.42529	0.0875912
DNM2_ENST00000314646	0.317797	0.601695	0.0805085	0.528169	0.133803	0.253333	0.465839	1.51064	0.0875576	236					DNM2_ENST00000314646	0.317797	0.601695	0.0805085	DNM2_ENST00000314646	0.317797	0.601695	0.0805085									DNM2_ENST00000314646	0.528169	0.133803	0.253333	DNM2_ENST00000314646	0.528169	0.133803	0.253333									DNM2_ENST00000314646	0.465839	1.51064
XPOT	0.29661	0.622881	0.0805085	0.47619	0.129252	0.271429	0.421687	1.65169	0.0875576	236					XPOT	0.29661	0.622881	0.0805085	XPOT	0.29661	0.622881	0.0805085									XPOT	0.47619	0.129252	0.271429	XPOT	0.47619	0.129252	0.271429					XPOT	0.421687	1.65169	0.0875576
CNTNAP3	0.207627	0.711864	0.0805085	0.291667	0.113095	0.387755	0.262032	2.47059	0.0875576	236					CNTNAP3	0.207627	0.711864	0.0805085	CNTNAP3	0.207627	0.711864	0.0805085					CNTNAP3	0.291667	0.113095	0.387755					CNTNAP3	0.291667	0.113095	0.387755					CNTNAP3	0.262032	2.47059	0.0875576
NUP160	0.216102	0.70339	0.0805085	0.307229	0.114458	0.372549	0.275676	2.37143	0.0875576	236					NUP160	0.216102	0.70339	0.0805085	NUP160	0.216102	0.70339	0.0805085					NUP160	0.307229	0.114458	0.372549					NUP160	0.307229	0.114458	0.372549					NUP160	0.275676	2.37143	0.0875576
ANK3_ENST00000395293	0.252874	0.666667	0.0804598	0.37931	0.12069	0.318182	0.338462	2	0.0875	348					ANK3_ENST00000395293	0.252874	0.666667	0.0804598	ANK3_ENST00000395293	0.252874	0.666667	0.0804598					ANK3_ENST00000395293	0.37931	0.12069	0.318182					ANK3_ENST00000395293	0.37931	0.12069	0.318182					ANK3_ENST00000395293	0.338462	2	0.0875
ATR	0.114943	0.804598	0.0804598	0.142857	0.1	0.7	0.12987	4.11765	0.0875	870					ATR	0.114943	0.804598	0.0804598					ATR	0.114943	0.804598	0.0804598					ATR	0.142857	0.1	0.7	ATR	0.142857	0.1	0.7									ATR	0.12987	4.11765
PAXIP1	0.304598	0.614943	0.0804598	0.495327	0.130841	0.264151	0.438017	1.59701	0.0875	174					PAXIP1	0.304598	0.614943	0.0804598	PAXIP1	0.304598	0.614943	0.0804598									PAXIP1	0.495327	0.130841	0.264151	PAXIP1	0.495327	0.130841	0.264151					PAXIP1	0.438017	1.59701	0.0875
IQUB	0.206294	0.713287	0.0804196	0.289216	0.112745	0.389831	0.259912	2.4878	0.0874525	286					IQUB	0.206294	0.713287	0.0804196	IQUB	0.206294	0.713287	0.0804196					IQUB	0.289216	0.112745	0.389831					IQUB	0.289216	0.112745	0.389831					IQUB	0.259912	2.4878	0.0874525
MYO1B	0.155779	0.763819	0.080402	0.203947	0.105263	0.516129	0.184524	3.23404	0.0874317	199					MYO1B	0.155779	0.763819	0.080402	MYO1B	0.155779	0.763819	0.080402									MYO1B	0.203947	0.105263	0.516129	MYO1B	0.203947	0.105263	0.516129									MYO1B	0.184524	3.23404
NEK1_ENST00000507142	0.190955	0.728643	0.080402	0.262069	0.110345	0.421053	0.236025	2.68519	0.0874317	199					NEK1_ENST00000507142	0.190955	0.728643	0.080402	NEK1_ENST00000507142	0.190955	0.728643	0.080402					NEK1_ENST00000507142	0.262069	0.110345	0.421053					NEK1_ENST00000507142	0.262069	0.110345	0.421053					NEK1_ENST00000507142	0.236025	2.68519	0.0874317
ANGPTL5	0.1875	0.732143	0.0803571	0.256098	0.109756	0.428571	0.230769	2.73333	0.0873786	112					ANGPTL5	0.1875	0.732143	0.0803571	ANGPTL5	0.1875	0.732143	0.0803571					ANGPTL5	0.256098	0.109756	0.428571					ANGPTL5	0.256098	0.109756	0.428571					ANGPTL5	0.230769	2.73333	0.0873786
NRF1	0.160714	0.758929	0.0803571	0.211765	0.105882	0.5	0.191489	3.14815	0.0873786	112					NRF1	0.160714	0.758929	0.0803571	NRF1	0.160714	0.758929	0.0803571									NRF1	0.211765	0.105882	0.5	NRF1	0.211765	0.105882	0.5									NRF1	0.191489	3.14815
BBS9_ENST00000242067	0.188755	0.730924	0.0803213	0.258242	0.10989	0.425532	0.232673	2.71642	0.0873362	249					BBS9_ENST00000242067	0.188755	0.730924	0.0803213	BBS9_ENST00000242067	0.188755	0.730924	0.0803213					BBS9_ENST00000242067	0.258242	0.10989	0.425532					BBS9_ENST00000242067	0.258242	0.10989	0.425532					BBS9_ENST00000242067	0.232673	2.71642	0.0873362
MED23_ENST00000403834	0.208835	0.710843	0.0803213	0.293785	0.112994	0.384615	0.263959	2.45833	0.0873362	249					MED23_ENST00000403834	0.208835	0.710843	0.0803213	MED23_ENST00000403834	0.208835	0.710843	0.0803213					MED23_ENST00000403834	0.293785	0.112994	0.384615					MED23_ENST00000403834	0.293785	0.112994	0.384615					MED23_ENST00000403834	0.263959	2.45833	0.0873362
CPNE3	0.211679	0.708029	0.080292	0.298969	0.113402	0.37931	0.268519	2.425	0.0873016	137					CPNE3	0.211679	0.708029	0.080292	CPNE3	0.211679	0.708029	0.080292					CPNE3	0.298969	0.113402	0.37931					CPNE3	0.298969	0.113402	0.37931					CPNE3	0.268519	2.425	0.0873016
SMARCC2_ENST00000394023	0.164234	0.755474	0.080292	0.217391	0.10628	0.488889	0.196507	3.08955	0.0873016	274					SMARCC2_ENST00000394023	0.164234	0.755474	0.080292	SMARCC2_ENST00000394023	0.164234	0.755474	0.080292									SMARCC2_ENST00000394023	0.217391	0.10628	0.488889	SMARCC2_ENST00000394023	0.217391	0.10628	0.488889									SMARCC2_ENST00000394023	0.196507	3.08955
SRP68	0.182482	0.737226	0.080292	0.247525	0.108911	0.44	0.223214	2.80556	0.0873016	137					SRP68	0.182482	0.737226	0.080292	SRP68	0.182482	0.737226	0.080292					SRP68	0.247525	0.108911	0.44					SRP68	0.247525	0.108911	0.44					SRP68	0.223214	2.80556	0.0873016
TFE3_ENST00000336239	0.233577	0.686131	0.080292	0.340426	0.117021	0.34375	0.304762	2.18605	0.0873016	137					TFE3_ENST00000336239	0.233577	0.686131	0.080292	TFE3_ENST00000336239	0.233577	0.686131	0.080292					TFE3_ENST00000336239	0.340426	0.117021	0.34375					TFE3_ENST00000336239	0.340426	0.117021	0.34375					TFE3_ENST00000336239	0.304762	2.18605	0.0873016
ARID4A	0.156118	0.763713	0.0801688	0.20442	0.104972	0.513514	0.185	3.23214	0.087156	237					ARID4A	0.156118	0.763713	0.0801688	ARID4A	0.156118	0.763713	0.0801688									ARID4A	0.20442	0.104972	0.513514	ARID4A	0.20442	0.104972	0.513514									ARID4A	0.185	3.23214
BIRC6_ENST00000421745	0.183351	0.736565	0.0800843	0.248927	0.108727	0.436782	0.224516	2.796	0.0870561	949					BIRC6_ENST00000421745	0.183351	0.736565	0.0800843	BIRC6_ENST00000421745	0.183351	0.736565	0.0800843					BIRC6_ENST00000421745	0.248927	0.108727	0.436782					BIRC6_ENST00000421745	0.248927	0.108727	0.436782					BIRC6_ENST00000421745	0.224516	2.796	0.0870561
YES1	0.0971429	0.822857	0.08	0.118056	0.0972222	0.823529	0.107595	4.64516	0.0869565	175					YES1	0.0971429	0.822857	0.08					YES1	0.0971429	0.822857	0.08					YES1	0.118056	0.0972222	0.823529					YES1	0.118056	0.823529	0.823529					YES1	0.107595	4.64516
ALG1	0.22	0.7	0.08	0.314286	0.114286	0.363636	0.282051	2.33333	0.0869565	100					ALG1	0.22	0.7	0.08	ALG1	0.22	0.7	0.08					ALG1	0.314286	0.114286	0.363636					ALG1	0.314286	0.114286	0.363636					ALG1	0.282051	2.33333	0.0869565
ANKFY1_ENST00000570535	0.192	0.728	0.08	0.263736	0.10989	0.416667	0.237624	2.67647	0.0869565	125					ANKFY1_ENST00000570535	0.192	0.728	0.08	ANKFY1_ENST00000570535	0.192	0.728	0.08					ANKFY1_ENST00000570535	0.263736	0.10989	0.416667					ANKFY1_ENST00000570535	0.263736	0.10989	0.416667					ANKFY1_ENST00000570535	0.237624	2.67647	0.0869565
ATP8B2_ENST00000368487	0.25	0.67	0.08	0.373134	0.119403	0.32	0.333333	2.0303	0.0869565	100					ATP8B2_ENST00000368487	0.25	0.67	0.08	ATP8B2_ENST00000368487	0.25	0.67	0.08					ATP8B2_ENST00000368487	0.373134	0.119403	0.32					ATP8B2_ENST00000368487	0.373134	0.119403	0.32					ATP8B2_ENST00000368487	0.333333	2.0303	0.0869565
COPS2	0.15	0.77	0.08	0.194805	0.103896	0.533333	0.176471	3.34783	0.0869565	100					COPS2	0.15	0.77	0.08	COPS2	0.15	0.77	0.08									COPS2	0.194805	0.103896	0.533333	COPS2	0.194805	0.103896	0.533333									COPS2	0.176471	3.34783
DTHD1_ENST00000456874	0.18	0.74	0.08	0.243243	0.108108	0.444444	0.219512	2.84615	0.0869565	100					DTHD1_ENST00000456874	0.18	0.74	0.08	DTHD1_ENST00000456874	0.18	0.74	0.08					DTHD1_ENST00000456874	0.243243	0.108108	0.444444					DTHD1_ENST00000456874	0.243243	0.108108	0.444444					DTHD1_ENST00000456874	0.219512	2.84615	0.0869565
EIF2AK4	0.22	0.7	0.08	0.314286	0.114286	0.363636	0.282051	2.33333	0.0869565	300					EIF2AK4	0.22	0.7	0.08	EIF2AK4	0.22	0.7	0.08					EIF2AK4	0.314286	0.114286	0.363636					EIF2AK4	0.314286	0.114286	0.363636					EIF2AK4	0.282051	2.33333	0.0869565
GAB3	0.228571	0.691429	0.08	0.330579	0.115702	0.35	0.296296	2.24074	0.0869565	175					GAB3	0.228571	0.691429	0.08	GAB3	0.228571	0.691429	0.08					GAB3	0.330579	0.115702	0.35					GAB3	0.330579	0.115702	0.35					GAB3	0.296296	2.24074	0.0869565
[truncated: 12,463 more rows]
[truncated: 9 more columns]

## Sheet: SSI
Gene symbol	indel_fS	indel_fM	indel_fN	indel_rSM	indel_rNM	indel_rNS	indel_rSMN	indel_rMSN	indel_rNSM	Number of 'substitutions and subtle indels'	PG_SSIf_1SD	indel_fS	indel_fM	indel_fN	CG_SSIf_1SD	indel_fS	indel_fM	indel_fN	PG_SSIf_2SD	indel_fS	indel_fM	indel_fN	CG_SSIf_2SD	indel_fS	indel_fM	indel_fN	PG_SSIr2_1SD	indel_rSM	indel_rNM	indel_rNS	CG_SSIr2_1SD	indel_rSM	indel_rNM	indel_rNS	PG_SSIr2_2SD	indel_rSM	indel_rNM	indel_rNS	CG_SSIr2_2SD	indel_rSM	indel_rNM	indel_rNS	PG_SSIr3_1SD	indel_rSMN	indel_rMNS	indel_rNSM	CG_SSIr3_1SD	indel_rSMN	indel_rMNS
[truncated: 13,930 more rows]
[truncated: 9 more columns]

[truncated: 2 more sheets: Fig 8 Pearson's correlation, Fig 8 Two samples t-test]
