# Supplementary material for: Use of signals of positive and negative selection to distinguish cancer genes and passenger genes
Source: eLife. 2021 Jan 11;10:e59629. doi: 10.7554/eLife.59629 (PMC7877913; doi:10.7554/eLife.59629)
Supplement: Supplementary file 6. — Transcripts of OGs (oncogenes) and TSGs (tumor suppressor genes) of the cancer gene list of Vogelstein et al., 2013 are highlighted by brick red and blue backgrounds, respectively. Transcripts of CGC genes (SON, Sondka et al., 2018) that do not correspond to OGs or TSGs of the cancer gene list of Vogelstein et al., 2013 are highlighted by yellow background. Novel positively or negatively selected cancer genes validated in the present work are highlighted in dark green background. [file elife-59629-supp6.xlsx]

## Sheet: missense
Gene name	Number of missense mutations g
JUN	245
A1CF	445
A2M	2084
A2ML1	1167
A4GALT	351
AAAS	577
AACS	600
AADAC	301
AADACL2	313
AADACL3	359
AADACL4	384
AAK1	757
AARS2	881
AARSD1	13
AASDH	878
AASS	659
AATK	1423
ABAT	422
ABCA1	1613
ABCA10	1130
ABCA12	1792
ABCA13	4242
ABCA2	2015
ABCA3	1492
ABCA4	2102
ABCA5	1193
ABCA6	1274
ABCA7	2593
ABCA8	1289
ABCA9	1166
ABCB1	1097
ABCB10	531
ABCB11	1123
ABCB4	967
ABCB5	1223
ABCB6	970
ABCB7	292
ABCB8	653
ABCB9	843
ABCC1	1197
ABCC10	1812
ABCC11	1263
ABCC12	1123
ABCC2	1315
ABCC3	1360
ABCC4	983
ABCC5	861
ABCC6	1495
ABCC8	1316
ABCC9	827
ABCD1	764
ABCD2	433
ABCD3	392
ABCD4	605
ABCE1	205
ABCF1	522
ABCF2	339
ABCF3	565
ABCG1	649
ABCG2	605
ABCG4	413
ABCG5	1216
ABCG8	839
ABHD16A	357
ABHD2	231
ABHD8	495
ABI3	371
ABI3BP	1344
ABL1	820
ABL2	887
ABLIM1	686
ABLIM2	662
ABLIM3	632
ABR	832
ABRA	332
ABTB1	464
ABTB2	842
ACACB	1998
ACAD10	891
ACAD11	963
ACAD9	681
ACADS	453
ACAN	2101
ACAP1	1013
ACAP2	413
ACAP3	1336
ACBD3	357
ACBD5	472
ACCS	511
ACCSL	434
ACD	1611
ACE	1373
ACE2	333
ACHE	637
ACIN1	1207
ACKR3	266
ACLY	718
ACMSD	281
ACO1	663
ACO2	649
ACOT11	555
ACOT12	716
ACOX1	457
ACOX2	538
ACOX3	1073
ACOXL	617
ACRBP	407
ACSBG1	645
ACSBG2	549
ACSF2	407
ACSF3	1345
ACSL1	479
ACSL3	405
ACSL4	242
ACSL5	645
ACSL6	496
ACSM1	497
ACSM2A	637
ACSM2B	646
ACSM3	1427
ACSM4	309
ACSM5	569
ACSS1	536
ACSS2	532
ACSS3	587
ACTA1	206
ACTB	139
ACTBL2	356
ACTC1	189
ACTG1	455
ACTG2	164
ACTL6B	179
ACTL7A	394
ACTL7B	413
ACTL8	286
ACTL9	439
ACTN1	783
ACTN2	764
ACTN4	681
ACTR1B	508
ACTR5	516
ACTR8	919
ACTRT1	254
ACTRT2	363
ACVR1	289
ACVR1B	252
ACVR1C	296
ACVR2A	205
ACVR2B	366
ACVRL1	447
ADAD1	393
ADAD2	852
ADAM10	363
ADAM11	508
ADAM12	699
ADAM15	837
ADAM17	788
ADAM18	622
ADAM19	676
ADAM2	634
ADAM20	620
ADAM21	563
ADAM22	753
ADAM23	578
ADAM28	766
ADAM29	740
ADAM30	641
ADAM32	658
ADAM33	965
ADAM7	659
ADAM9	841
ADAMDEC1	388
ADAMTS1	839
ADAMTS10	839
ADAMTS12	1341
ADAMTS13	1863
ADAMTS14	1150
ADAMTS15	855
ADAMTS16	1063
ADAMTS17	1291
ADAMTS18	1430
ADAMTS19	835
ADAMTS2	1010
ADAMTS20	1585
ADAMTS3	963
ADAMTS4	953
ADAMTS5	792
ADAMTS6	649
ADAMTS7	1648
ADAMTS8	826
ADAMTS9	1554
ADAMTSL1	1903
ADAMTSL2	728
ADAMTSL3	1428
ADAMTSL4	1090
ADAR	867
ADARB1	466
ADARB2	654
ADAT1	491
ADCK1	530
ADCK2	535
ADCK5	754
ADCY1	615
ADCY10	1196
ADCY2	554
ADCY3	999
ADCY4	896
ADCY5	988
ADCY6	902
ADCY7	847
ADCY8	900
ADCY9	1161
ADCYAP1R1	337
ADD1	639
ADD2	558
ADD3	523
ADGB	1227
ADH1A	296
ADH1B	357
ADH6	296
ADH7	398
ADHFE1	410
ADORA1	253
ADORA2A	314
ADORA3	502
ADRA1A	706
ADRA1B	483
ADRA1D	574
ADRA2A	390
ADRB2	323
ADSL	401
AEBP1	1092
AFAP1	1116
AFAP1L1	619
AFAP1L2	726
AFF1	1021
AFF2	664
AFF3	1061
AFF4	695
AFG3L2	582
AFM	516
AFP	451
AFTPH	643
AGAP1	1111
AGAP2	843
AGAP3	858
AGAP5	538
AGAP6	640
AGBL1	1211
AGBL2	650
AGBL3	823
AGBL4	493
AGBL5	762
AGFG2	362
AGGF1	551
AGK	344
AGL	1260
AGMO	559
AGPAT4	227
AGPS	312
AGRN	2170
AGT	454
AGTPBP1	839
AGTR1	303
AGTR2	212
AGXT	458
AGXT2	488
AHCTF1	1711
AHCY	453
AHCYL2	360
AHDC1	1267
AHI1	1026
AHNAK	5128
AHNAK2	7768
AHR	593
AHSG	351
AICDA	165
AIFM1	563
AIFM3	489
AIM2	236
AIPL1	391
AIRE	586
AJAP1	373
AK5	349
AK7	649
AK8	437
AKAP1	662
AKAP11	1366
AKAP12	1368
AKAP13	2531
AKAP17A	650
AKAP3	681
AKAP4	413
AKAP6	1817
AKAP8	683
AKAP8L	630
AKAP9	2862
AKNA	1298
AKNAD1	662
AKR1D1	246
AKT1	256
AKT2	281
AKT3	164
ALAS1	471
ALAS2	286
ALB	520
ALCAM	399
ALDH16A1	948
ALDH18A1	513
ALDH1A1	313
ALDH1A2	371
ALDH1A3	317
ALDH1B1	484
ALDH1L1	777
ALDH1L2	615
ALDH2	397
ALDH3A1	629
ALDH3B2	419
ALDH4A1	542
ALDH5A1	606
ALDH6A1	880
ALDH8A1	387
ALDOB	376
ALG1	652
ALG10	333
ALG10B	412
ALG13	609
ALG9	447
ALK	1610
ALKBH8	490
ALLC	460
ALOX12	562
ALOX12B	549
ALOX15	574
ALOX15B	618
ALOX5	573
ALOXE3	790
ALPI	501
ALPK1	1030
ALPK2	1697
ALPK3	1543
ALPL	441
ALPP	600
ALS2	1138
ALS2CL	890
ALX1	275
ALX4	388
AMACR	379
AMBN	415
AMBP	313
AMBRA1	929
AMDHD1	444
AMDHD2	657
AMER1	720
AMFR	436
AMHR2	480
AMIGO2	667
AMOT	540
AMOTL1	782
AMOTL2	730
AMPD1	656
AMPD2	691
AMPD3	601
AMPH	926
AMY2B	543
AMZ1	1517
ANAPC1	1216
ANAPC2	1017
ANAPC4	443
ANAPC5	444
ANAPC7	374
ANGEL1	490
ANGPT1	304
ANGPT2	870
ANGPT4	435
ANGPTL1	166
ANGPTL2	369
ANGPTL4	392
ANGPTL5	403
ANK1	1539
ANK2	3052
ANK3	3072
ANKAR	1727
ANKFN1	959
ANKFY1	884
ANKH	400
ANKHD1	11
ANKHD1-EIF4EBP3	221
ANKIB1	599
ANKK1	782
ANKLE1	652
ANKLE2	836
ANKMY1	1343
ANKRD11	2730
ANKRD12	1456
ANKRD13B	434
ANKRD13C	599
ANKRD13D	644
ANKRD17	1286
ANKRD18A	922
ANKRD18B	823
ANKRD24	1541
ANKRD26	1518
ANKRD27	1086
ANKRD28	1239
ANKRD30A	1351
ANKRD30B	1288
ANKRD31	1229
ANKRD33	462
ANKRD34A	310
ANKRD34B	372
ANKRD34C	325
ANKRD35	856
ANKRD36	1789
ANKRD36C	1805
ANKRD44	723
ANKRD50	978
ANKRD52	625
ANKRD55	536
ANKRD6	656
ANKS1A	862
ANKS1B	748
ANKS3	754
ANKS4B	273
ANKS6	839
ANKZF1	716
ANLN	889
ANO1	740
ANO10	597
ANO2	905
ANO3	616
ANO4	713
ANO5	737
ANO6	733
ANO7	1093
ANO8	921
ANO9	1078
ANP32C	472
ANPEP	791
ANTXR1	432
ANTXR2	413
ANXA10	258
ANXA13	337
ANXA6	553
AOAH	592
AOC2	702
AOC3	681
AOX1	1115
AP1B1	594
AP1G1	465
AP1G2	876
AP1M1	195
AP2A1	720
AP2A2	589
AP2M1	109
AP3B1	756
AP3B2	780
AP3D1	939
AP4B1	697
AP4E1	814
AP4M1	638
AP5B1	869
APAF1	922
APBA1	672
APBA2	585
APBB1	543
APBB1IP	489
APBB2	504
APBB3	538
APC	3963
APC2	2397
APCDD1	521
APCDD1L	529
APCS	207
APEH	666
APEX2	338
APLNR	328
APLP1	526
APLP2	698
APOA4	415
APOA5	577
APOB	4135
APOBR	1004
APOH	341
APOL5	392
APP	597
APPBP2	237
APPL1	548
APPL2	510
AQP10	279
AQP7	391
AQP8	196
AQR	779
AR	661
ARAF	276
ARAP1	1167
ARAP2	1399
ARAP3	1195
ARC	281
ARFGAP2	751
ARFGEF1	792
ARFGEF2	1078
ARHGAP10	638
ARHGAP11A	761
ARHGAP12	587
ARHGAP15	452
ARHGAP17	672
ARHGAP18	516
ARHGAP20	823
ARHGAP21	1418
ARHGAP22	924
ARHGAP24	624
ARHGAP25	538
ARHGAP26	610
ARHGAP27	878
ARHGAP28	588
ARHGAP29	836
ARHGAP3	4
ARHGAP30	970
ARHGAP31	1048
ARHGAP32	1451
ARHGAP33	1191
ARHGAP35	809
ARHGAP36	304
ARHGAP39	1159
ARHGAP4	650
ARHGAP40	482
ARHGAP42	423
ARHGAP44	528
ARHGAP5	883
ARHGAP6	639
ARHGAP9	1096
ARHGEF1	664
ARHGEF10	1505
ARHGEF10L	1097
ARHGEF11	1576
ARHGEF12	881
ARHGEF15	773
ARHGEF16	622
ARHGEF17	1899
ARHGEF18	1325
ARHGEF19	691
ARHGEF2	695
ARHGEF25	585
ARHGEF26	834
ARHGEF3	594
ARHGEF33	944
ARHGEF37	594
ARHGEF4	1570
ARHGEF40	1279
ARHGEF5	1090
ARHGEF6	348
ARHGEF7	578
ARHGEF9	175
ARID1A	1561
ARID1B	1836
ARID2	1096
ARID3A	511
ARID3B	404
ARID3C	610
ARID4A	837
ARID4B	791
ARID5A	488
ARID5B	747
ARIH2	225
ARMC2	701
ARMC3	660
ARMC4	884
ARMC5	1036
ARMC6	428
ARMC8	423
ARMC9	862
ARMCX1	159
ARMCX2	272
ARMCX5	263
ARNT	519
ARNT2	469
ARNTL	359
ARNTL2	469
ARPP21	673
ARRB1	299
ARSB	543
ARSD	443
ARSF	393
ARSG	1328
ARSH	355
ARSI	485
ARSJ	398
ARVCF	1297
ASAP1	631
ASAP2	749
ASAP3	745
ASB10	560
ASB15	507
ASB17	215
ASB2	629
ASB3	628
ASB4	388
ASB5	294
ASCC2	633
ASCC3	1472
ASH1L	1850
ASH2L	346
ASL	386
ASMT	406
ASMTL	651
ASNS	362
ASNSD1	502
ASPG	748
ASPH	786
ASPHD1	739
ASPM	2787
ASPRV1	287
ASPSCR1	740
ASS1	349
ASTE1	249
ASTL	934
ASTN1	999
ASTN2	1128
ASXL1	1258
ASXL2	938
ASXL3	1721
ASZ1	387
ATAD2	914
ATAD2B	878
ATAD3A	661
ATAD3B	995
ATAD5	1133
ATCAY	271
ATE1	446
ATF2	259
ATF6	518
ATF6B	691
ATF7	327
ATF7IP	874
ATF7IP2	655
ATG14	419
ATG16L1	343
ATG2A	1678
ATG2B	1485
ATG4D	470
ATG7	947
ATG9A	482
ATIC	526
ATL1	308
ATM	6281
ATMIN	700
ATN1	1030
ATP10A	1347
ATP10B	1377
ATP10D	1065
ATP11A	1019
ATP11B	784
ATP11C	475
ATP12A	793
ATP13A1	962
ATP13A2	1099
ATP13A3	714
ATP13A4	920
ATP13A5	1133
ATP1A1	308
ATP1A2	500
ATP1A3	455
ATP1A4	842
ATP1B4	230
ATP2A1	748
ATP2A2	430
ATP2A3	952
ATP2B1	487
ATP2B2	696
ATP2B3	727
ATP2B4	836
ATP2C1	514
ATP2C2	1455
ATP4A	733
ATP6AP1	324
ATP6V0A1	446
ATP6V0A2	646
ATP6V0A4	795
ATP6V0D2	314
ATP6V1A	294
ATP6V1B1	492
ATP6V1B2	290
ATP6V1C2	449
ATP6V1H	328
ATP7A	908
ATP7B	1465
ATP8A1	670
ATP8A2	834
ATP8B1	884
ATP8B2	792
ATP8B3	1320
ATP8B4	975
ATP9A	573
ATP9B	1308
ATR	1425
ATRIP	1462
ATRN	919
ATRNL1	978
ATRX	1072
ATXN1	769
ATXN2	768
ATXN2L	885
ATXN7	892
ATXN7L1	845
ATXN7L2	659
AURKA	255
AURKB	313
AURKC	226
AUTS2	1041
AVIL	842
AVPR1A	391
AVPR1B	406
AXDND1	959
AXIN1	820
AXIN2	1030
AXL	703
AZGP1	285
B2M	106
B3GALT1	181
B3GAT1	257
B3GAT2	757
B3GNT3	290
B3GNT7	332
B3GNT9	409
B3GNTL1	473
B4GALNT1	916
B4GALNT2	481
B4GALNT3	823
B4GALNT4	906
B4GALT5	212
BAAT	337
BACE1	389
BACE2	343
BACH1	502
BACH2	549
BAG3	597
BAG6	1434
BAHCC1	2685
BAHD1	653
BAIAP2	564
BAIAP2L1	919
BAIAP3	1376
BANK1	625
BANP	409
BAP1	694
BARD1	1312
BARHL1	259
BARHL2	336
BASP1	249
BAZ1A	879
BAZ1B	795
BAZ2A	1373
BAZ2B	1549
BBS1	921
BBS10	585
BBS12	523
BBS2	807
BBS7	487
BBS9	698
BBX	723
BCAM	620
BCAN	816
BCAR1	1022
BCAR3	827
BCAS1	532
BCAS3	748
BCAT1	373
BCAT2	316
BCHE	574
BCKDHA	554
BCKDK	369
BCL11A	566
BCL11B	589
BCL2	188
BCL2L12	448
BCL6	478
BCL6B	402
BCL9	1228
BCL9L	1399
BCLAF1	1380
BCO2	453
BCOR	1119
BCORL1	911
BCR	1572
BDKRB1	291
BDKRB2	327
BDP1	2011
BEGAIN	528
BEND2	419
BEND3	626
BEND4	400
BEND5	530
BEST2	427
BEST3	520
BFSP1	559
BFSP2	343
BGN	215
BHLHB9	250
BHMT	323
BICC1	797
BICD1	678
BICD2	665
BIN1	449
BIN2	406
BIRC2	454
BIRC3	445
BIRC6	3255
BIVM	428
BLK	714
BLM	1232
BLNK	404
BMP1	1007
BMP10	284
BMP15	243
BMP2	285
BMP2K	1269
BMP3	410
BMP4	354
BMP5	357
BMP6	493
BMP7	392
BMPER	578
BMPR1A	555
BMPR1B	425
BMPR2	746
BMS1	1029
BMX	614
BNC1	745
BNC2	899
BOC	912
BPI	512
BPIFB4	580
BPTF	1807
BRAF	572
BRAP	468
BRAT1	975
BRCA1	3226
BRCA2	5807
BRD	1
BRD1	884
BRD2	705
BRD3	485
BRD4	1084
BRD7	483
BRD8	787
BRD9	827
BRDT	687
BRF1	1275
BRIP1	1629
BRPF1	734
BRPF3	785
BRS3	163
BRSK1	692
BRSK2	753
BRWD1	1506
BRWD3	636
BSG	411
BSN	3188
BSND	271
BTAF1	927
BTBD11	889
BTBD16	444
BTBD17	394
BTBD2	440
BTBD3	322
BTBD7	884
BTBD9	392
BTK	288
BTN1A1	376
BTN2A1	490
BTN2A2	455
BTN3A1	421
BTN3A3	489
BTNL	10
BTNL3	347
BTNL8	466
BTNL9	605
BTRC	437
BUB1	727
BUB1B	755
BUD13	559
BVES	271
C	1
C10orf120	296
C10orf71	1201
C10orf90	750
C11orf	3
C11orf80	884
C12orf4	343
C12orf40	648
C12orf42	499
C12orf5	1
C12orf50	381
C12orf56	484
C14orf3	1
C14orf39	475
C15orf3	2
C15orf39	869
C16orf	1
C16orf46	411
C16orf6	2
C16orf7	5
C16orf71	783
C16orf78	252
C16orf89	503
C16orf96	1004
C17orf7	11
C17orf80	670
C17orf97	492
C19orf44	553
C19orf57	773
C1orf	2
C1orf112	975
C1orf116	575
C1orf12	2
C1orf127	713
C1orf141	353
C1orf167	977
C1orf4	1
C1orf44	1
C1orf7	10
C1orf71	9
C1orf87	432
C1orf94	512
C1QTNF2	351
C1R	491
C1RL	450
C1S	476
C2	939
C20orf194	792
C2CD2	546
C2CD2L	533
C2CD3	1846
C2orf14	3
C2orf16	1045
C2orf42	391
C2orf7	1
C2orf78	701
C3	1109
C3AR1	394
C3orf2	1
C3orf20	826
C4BPA	379
C4orf5	7
C4orf50	1186
C5	1159
C5AR1	321
C5orf34	501
C6	843
C6orf11	3
C6orf118	480
C7	750
C7orf31	519
C8A	576
C8B	548
C8orf34	416
C9	513
C9orf131	919
C9orf43	640
C9orf50	177
CA	2
CA10	209
CA4	299
CA8	203
CA9	390
CABIN1	1679
CABP4	360
CABS1	351
CACHD1	937
CACNA1A	1880
CACNA1B	1693
CACNA1C	1459
CACNA1D	1249
CACNA1E	1352
CACNA1F	1060
CACNA1G	1595
CACNA1H	3601
CACNA1I	1505
CACNA1S	1665
CACNA2D1	635
CACNA2D2	1131
CACNA2D3	728
CACNA2D4	1049
CACNB1	494
CACNB2	965
CACNB3	316
CACNB4	304
CACNG2	204
CACNG3	158
CACNG4	215
CACNG5	239
CACNG7	277
CACNG8	234
CAD	1677
CADM1	320
CADM2	265
CADM3	303
CADPS	895
CADPS2	909
CAGE1	611
CALB2	223
CALCOCO1	499
CALCR	420
CALCRL	260
CALD1	625
CALN1	213
CALR	336
CALR3	375
CAMK1D	216
CAMK1G	309
CAMK2A	152
CAMK2B	389
CAMK2G	374
CAMK4	298
CAMKK1	460
CAMKK2	492
CAMKV	240
CAMSAP1	1217
CAMSAP2	849
CAMSAP3	987
CAMTA1	1237
CAMTA2	1479
CAN	2
CAND1	546
CAND2	1096
CANT1	372
CANX	680
CAP2	336
CAPN	5
CAPN1	582
CAPN10	596
CAPN11	625
CAPN12	819
CAPN13	608
CAPN14	538
CAPN2	602
CAPN3	749
CAPN5	738
CAPN6	285
CAPN7	569
CAPN9	612
CAPRIN1	470
CAPRIN2	806
CAPS2	950
CAPSL	218
CARD	7
CARD1	3
CARD10	826
CARD11	764
CARD14	1395
CARD6	816
CARD8	456
CARD9	869
CARM1	437
CARNS1	832
CARS2	607
CASC1	495
CASC3	529
CASD1	500
CASK	690
CASKIN1	1293
CASKIN2	1391
CASP	3
CASP2	598
CASP5	413
CASP8	396
CASP8AP2	1373
CASQ1	321
CASQ2	340
CASR	868
CASS4	601
CAST	696
CASZ1	1531
CATSPER1	643
CATSPER2	465
CATSPER3	322
CATSPER4	435
CATSPERB	754
CATSPERG	879
CB	11
CB2	6
CB4	1
CBFA2T2	420
CBFA2T3	1459
CBFB	111
CBL	696
CBLB	699
CBLC	456
CBLL1	370
CBLN2	136
CBLN4	121
CBS	565
CBX2	716
CBX4	457
CBX6	333
CBX8	310
CC2D1A	865
CC2D1B	808
CC2D2A	1311
CCAR1	579
CCBE1	457
CCDC	8
CCDC1	14
CCDC102A	682
CCDC102B	499
CCDC105	702
CCDC11	8
CCDC110	651
CCDC114	634
CCDC116	737
CCDC120	483
CCDC12A	3
CCDC13	578
CCDC136	1024
CCDC138	585
CCDC14	734
CCDC141	1286
CCDC144A	997
CCDC146	697
CCDC148	511
CCDC15	735
CCDC150	890
CCDC151	404
CCDC157	1375
CCDC158	871
CCDC166	396
CCDC175	594
CCDC18	1325
CCDC2	4
CCDC27	734
CCDC28A	224
CCDC2A	2
CCDC3	6
CCDC30	1419
CCDC33	1020
CCDC38	463
CCDC39	836
CCDC4	8
CCDC40	1462
CCDC5	2
CCDC50	397
CCDC54	260
CCDC57	1200
CCDC5A	7
CCDC6	229
CCDC60	453
CCDC61	465
CCDC62	485
CCDC63	460
CCDC66	832
CCDC68	248
CCDC7	7
CCDC73	816
CCDC8	532
CCDC80	774
CCDC81	484
CCDC82	927
CCDC83	362
CCDC85A	731
CCDC87	1276
CCDC88A	1196
CCDC88B	1624
CCDC88C	1815
CCDC9	588
CCDC93	549
CCDC96	1150
CCDCA	1
CCDCB	8
CCDCC	9
CCHCR1	952
CCIN	416
CCKAR	397
CCKBR	522
CCM2	410
CCNA1	305
CCNB3	678
CCND1	207
CCND2	153
CCND3	340
CCNE1	257
CCNF	645
CCNJL	488
CCNL1	316
CCNL2	578
CCNT1	492
CCNT2	471
CCP11	3
CCP110	724
CCPG1	705
CCR2	322
CCR3	345
CCR4	225
CCR5	361
CCR6	195
CCR7	225
CCR9	530
CCSER2	869
CCT	1
CCT3	450
CCT5	411
CCT6A	582
CCT6B	700
CCT7	342
CCT8	358
CCT8L2	437
CD1	3
CD101	798
CD109	1129
CD163	767
CD163L1	1108
CD180	505
CD19	414
CD1A	303
CD1B	389
CD1C	334
CD1D	296
CD1E	339
CD2	302
CD200R1L	218
CD209	343
CD22	659
CD226	259
CD24	1
CD248	614
CD276	485
CD2AP	482
CD2R1L	1
CD3	3
CD300LB	200
CD300LG	342
CD33	354
CD36	602
CD3LG	2
CD4	351
CD44	645
CD5	377
CD5L	291
CD6	475
CD79B	138
CD84	268
CD86	244
CD93	640
CD96	711
CDAN1	1140
CDC14A	521
CDC16	396
CDC20B	589
CDC23	302
CDC25B	466
CDC27	621
CDC2B	2
CDC37	316
CDC40	338
CDC42BPA	1203
CDC42BPB	1162
CDC42BPG	1475
CDC45	517
CDC5L	405
CDC7	395
CDC73	733
CDCA2	894
CDCA7	299
CDCA7L	422
CDCP1	627
CDCP2	518
CDH	2
CDH1	1259
CDH10	476
CDH11	649
CDH12	593
CDH13	799
CDH15	920
CDH16	765
CDH17	669
CDH18	583
CDH19	683
CDH2	650
CDH20	629
CDH22	614
CDH23	3579
CDH24	822
CDH26	794
CDH3	742
CDH4	740
CDH5	666
CDH6	494
CDH7	516
CDH8	507
CDH9	585
CDHR1	915
CDHR2	1582
CDHR3	808
CDHR4	741
CDHR5	1424
CDK1	1
CDK11A	742
CDK11B	542
CDK12	947
CDK13	1055
CDK14	325
CDK15	336
CDK17	246
CDK18	468
CDK19	424
CDK5RAP1	458
CDK5RAP2	1455
CDK6	143
CDK8	151
CDKAL1	417
CDKL2	434
CDKL5	917
CDKN1A	236
CDKN1B	530
CDKN2A	587
CDON	1024
CDR1	168
CDRT1	608
CDS1	279
CDX4	187
CDYL	367
CDYL2	468
CEACAM	1
CEACAM1	425
CEACAM16	422
CEACAM18	313
CEACAM20	491
CEACAM5	581
CEACAM6	296
CEACAM7	257
CEACAM8	361
CEBPA	339
CEBPZ	1089
CECR2	1190
CEL	915
CELF1	453
CELF2	240
CELF3	250
CELF4	438
CELF5	235
CELF6	343
CELSR1	2884
CELSR2	2374
CELSR3	2374
CENPB	395
CENPE	1714
CENPF	2262
CENPI	289
CENPJ	1250
CEP	9
CEP104	932
CEP112	763
CEP12	6
CEP120	803
CEP128	878
CEP135	838
CEP14	1
CEP152	1311
CEP164	1496
CEP17	1
CEP170	1077
CEP192	1911
CEP2	8
CEP25	15
CEP250	1786
CEP290	1751
CEP35	3
CEP350	2251
CEP5	8
CEP57	488
CEP5L	4
CEP6	2
CEP63	572
CEP68	700
CEP7	8
CEP70	500
CEP72	807
CEP76	481
CEP78	595
CEP85	571
CEP85L	657
CEP89	847
CEP95	787
CEP97	589
CER1	297
CERCAM	544
CERK	433
CERKL	567
CES1	524
CES2	481
CES3	456
CES4A	528
CES5A	554
CETN1	135
CETP	452
CFB	587
CFH	969
CFHR1	274
CFHR2	233
CFHR3	255
CFHR4	526
CFHR5	532
CFI	522
CFP	248
CFTR	1853
CGN	1002
CGNL1	1307
CHAD	724
CHAF1A	730
CHAF1B	343
CHAT	710
CHD	13
CHD1	868
CHD1L	909
CHD2	913
CHD3	1209
CHD4	863
CHD5	1125
CHD6	1631
CHD7	2065
CHD8	1429
CHD9	1686
CHDH	624
CHEK1	480
CHEK2	1416
CHERP	728
CHFR	557
CHGB	547
CHI3L1	344
CHIA	462
CHIT1	405
CHL1	1178
CHM	312
CHML	775
CHN1	363
CHN2	583
CHPF	910
CHPF2	876
CHRD	1067
CHRDL1	255
CHRDL2	385
CHRM1	237
CHRM2	267
CHRM3	358
CHRM4	300
CHRM5	928
CHRNA	3
CHRNA1	401
CHRNA10	463
CHRNA2	515
CHRNA3	395
CHRNA4	670
CHRNA5	384
CHRNA6	381
CHRNA9	389
CHRNB1	491
CHRNB2	431
CHRNB3	324
CHRNB4	492
CHRND	747
CHRNG	597
CHST1	302
CHST10	252
CHST11	255
CHST12	460
CHST13	375
CHST15	558
CHST2	422
CHST3	480
CHST4	331
CHST5	445
CHST6	488
CHST7	254
CHST8	411
CHST9	343
CHSY1	705
CHSY3	723
CHTF1	22
CHTF18	2548
CHUK	406
CIC	1850
CIITA	1460
CILP	1055
CILP2	1323
CIT	1264
CIZ1	736
CKAP2	541
CKAP2L	713
CKAP4	496
CKAP5	1072
CKM	383
CKMT2	310
CLASP1	992
CLASP2	882
CLASRP	566
CLCA1	698
CLCA2	732
CLCA4	711
CLCN1	906
CLCN2	825
CLCN3	402
CLCN4	227
CLCN5	338
CLCN6	622
CLCN7	648
CLCNKA	629
CLCNKB	702
CLDN17	187
CLEC14A	958
CLEC16A	1092
CLEC1A	263
CLEC3A	270
CLEC4F	594
CLEC4M	322
CLGN	406
CLIC5	382
CLIC6	739
CLINT1	416
CLIP1	933
CLIP2	814
CLIP3	369
CLIP4	539
CLK1	400
CLK2	410
CLK3	691
CLMN	830
CLN3	397
CLNK	427
CLOCK	871
CLP	3
CLP1	224
CLPB	586
CLPTM1	400
CLPTM1L	483
CLPX	382
CLSPN	950
CLSTN1	779
CLSTN2	756
CLSTN3	899
CLTC	418
CLTCL1	1339
CLU	347
CLUL1	371
CLVS1	217
CLVS2	178
CMIP	523
CMKLR1	298
CMYA5	3085
CNBD1	469
CNDP1	434
CNDP2	411
CNGA1	637
CNGA2	427
CNGA3	657
CNGA4	504
CNGB1	1222
CNGB3	728
CNKSR1	786
CNKSR2	322
CNKSR3	460
CNNM1	662
CNNM2	448
CNNM3	590
CNNM4	564
CNOT1	996
CNOT10	513
CNOT2	221
CNOT3	673
CNOT4	366
CNOT6	270
CNR1	253
CNST	814
CNTLN	1456
CNTN1	659
CNTN2	890
CNTN3	699
CNTN4	783
CNTN5	1029
CNTN6	1115
CNTNAP1	957
CNTNAP2	1189
CNTNAP3	998
CNTNAP3B	1240
CNTNAP4	1205
CNTNAP5	1063
CNTRL	1651
CNTROB	1157
CO1	4
COASY	633
COBL	1284
COBLL1	991
COCH	451
COG	6
COG1	848
COG2	518
COG3	506
COG4	758
COG5	1265
COG6	595
COG7	543
COG8	1433
COIL	432
COL10A1	1074
COL11A1	1509
COL11A2	1462
COL12A1	2283
COL13A1	607
COL14A1	1257
COL15A1	1225
COL16A1	1322
COL17A1	1378
COL18A1	2390
COL19A1	920
COL1A1	1446
COL1A2	1389
COL20A1	1458
COL21A1	772
COL22A1	1539
COL23A1	512
COL24A1	1433
COL25A1	500
COL27A1	1726
COL28A1	1119
COL2A1	1146
COL3A1	1322
COL4A1	1145
COL4A2	1564
COL4A3	1289
COL4A4	1542
COL4A5	1239
COL4A6	888
COL5A1	1569
COL5A2	1086
COL5A3	1559
COL6A1	1038
COL6A2	1377
COL6A3	2910
COL6A5	1904
COL6A6	1843
COL7A1	2459
COL8A1	525
COL8A2	592
COL9A1	820
COL9A2	656
COL9A3	881
COLA1	7
COLA2	4
COLA3	3
COLEC1	1
COLEC10	226
COLEC11	415
COLEC12	501
COLQ	435
COMP	673
COPA	701
COPB1	527
COPB2	563
COPS2	104
Corf131	1
Corf43	2
CORIN	939
CORO1A	333
CORO1B	1010
CORO1C	309
CORO2A	409
CORO2B	311
CORO6	558
CORO7	1599
COX10	410
CP	842
CPA1	329
CPA2	337
CPA3	388
CPA4	331
CPA5	402
CPA6	397
CPAMD	8
CPAMD8	1767
CPB1	334
CPB2	272
CPD	846
CPE	313
CPEB2	914
CPEB3	512
CPEB4	362
CPED1	857
CPN1	376
CPN2	433
CPNE	2
CPNE1	445
CPNE2	397
CPNE3	451
CPNE4	348
CPNE5	500
CPNE6	425
CPNE7	780
CPNE8	348
CPNE9	464
CPS1	1198
CPSF2	354
CPSF3	344
CPSF6	225
CPT1A	592
CPT1B	671
CPT1C	776
CPVL	391
CPXCR1	176
CPXM1	585
CPXM2	708
CPZ	1064
CR1	1525
CR1L	499
CR2	835
CRAT	583
CRB1	1273
CRB2	1256
CREB3L1	442
CREB3L2	468
CREB3L3	415
CREB5	645
CREBBP	1702
CRHBP	232
CRHR1	327
CRHR2	418
CRIM1	885
CRISP1	255
CRISP2	247
CRISP3	254
CRISPLD1	393
CRISPLD2	562
CRLF2	304
CRMP1	367
CRNKL1	928
CRNN	414
CROCC	2358
CROT	483
CRP	186
CRTAC1	882
CRTAM	301
CRTC1	532
CRTC2	908
CRTC3	494
CRX	248
CRY1	401
CRY2	392
CRYBB1	207
CRYBG3	2088
CS	194
CSAD	534
CSDE1	364
CSE1L	502
CSF1	464
CSF1R	712
CSF2RA	493
CSF2RB	802
CSF3R	676
CSGALNACT1	663
CSGALNACT2	392
CSK	183
CSMD1	4878
CSMD2	2861
CSMD3	2738
CSNK1A1	47
CSNK1A1L	283
CSNK1G2	363
CSNK2A1	154
CSPG4	1926
CSPG5	433
CSPP1	1234
CSRNP1	511
CSRNP2	586
CSRNP3	416
CSTF1	157
CSTF2	180
CSTF3	223
CT47B1	453
CTAGE1	715
CTBP1	244
CTBP2	1147
CTC1	989
CTCF	299
CTCFL	685
CTDP1	1059
CTIF	515
CTNNA1	560
CTNNA2	578
CTNNA3	885
CTNNAL1	680
CTNNB1	452
CTNNBL1	348
CTNND1	675
CTNND2	880
CTPS2	258
CTR9	521
CTSA	1096
CTSC	440
CTSD	330
CTSE	369
CTSG	207
CTTN	582
CTTNBP2	1281
CTTNBP2NL	450
CTU2	1124
CUBN	3061
CUL1	199
CUL2	372
CUL3	301
CUL4A	531
CUL4B	242
CUL5	262
CUL7	1689
CUL9	1725
CUX1	1327
CUX2	1133
CUZD1	435
CWC22	608
CWF19L2	764
CWH43	584
CX3CR1	274
CXCR1	324
CXCR2	284
CXCR4	214
CXorf66	203
CXXC1	336
CYB5R4	362
CYBB	270
CYFIP2	696
CYLC1	404
CYLC2	362
CYLD	447
CYP11A1	394
CYP11B1	546
CYP11B2	484
CYP17A1	347
CYP19A1	399
CYP1A1	523
CYP1A2	465
CYP1B1	654
CYP24A1	490
CYP26A1	423
CYP26B1	433
CYP26C1	523
CYP27A1	500
CYP27C1	365
CYP2A13	533
CYP2A6	578
CYP2A7	608
CYP2B6	488
CYP2C18	440
CYP2C19	553
CYP2C8	461
CYP2C9	563
CYP2D6	749
CYP2E1	391
CYP2F1	597
CYP2S1	406
CYP2W1	1196
CYP39A1	513
CYP3A4	447
CYP3A43	415
CYP3A5	752
CYP3A7	806
CYP46A1	265
CYP4A11	542
CYP4A22	533
CYP4B1	500
CYP4F11	577
CYP4F12	636
CYP4F2	492
CYP4F22	472
CYP4F3	581
CYP4F8	462
CYP4V2	471
CYP4X1	390
CYP4Z1	390
CYP7A1	405
CYP7B1	489
CYP8B1	424
CYSLTR1	226
CYSLTR2	285
CYTH3	280
CYTH4	282
CYTIP	268
D2HGDH	852
DAAM1	687
DAAM2	928
DAB1	394
DAB2	575
DAB2IP	1052
DACH2	343
DACT1	794
DACT2	693
DAG1	691
DAGLA	647
DAGLB	714
DAO	283
DAPK1	989
DAPK3	394
DARS2	495
DAXX	345
DAZAP1	346
DBF4	461
DBF4B	698
DBH	635
DBN1	630
DBX2	344
DCAF12	262
DCAF12L1	224
DCAF12L2	269
DCAF13	467
DCAF15	492
DCAF4	472
DCAF4L1	233
DCAF4L2	345
DCAF5	570
DCAF6	648
DCAF8L1	327
DCAF8L2	349
DCBLD1	626
DCBLD2	579
DCC	1182
DCDC1	1452
DCDC2	441
DCHS1	2750
DCHS2	2880
DCLK1	372
DCLK2	580
DCLK3	501
DCLRE1A	802
DCLRE1B	499
DCLRE1C	891
DCN	247
DCP1B	579
DCST1	689
DCST2	723
DCT	514
DCTN1	994
DCX	210
DDB1	522
DDC	477
DDHD1	718
DDHD2	824
DDI1	342
DDN	735
DDO	307
DDR1	713
DDR2	536
DDX1	442
DDX10	664
DDX11	1029
DDX17	345
DDX18	531
DDX20	785
DDX21	414
DDX23	362
DDX24	774
DDX27	540
DDX31	1007
DDX39A	275
DDX3X	403
DDX4	420
DDX41	400
DDX42	495
DDX43	487
DDX46	319
DDX5	282
DDX50	425
DDX51	822
DDX53	371
DDX54	1262
DDX55	543
DDX56	498
DDX58	653
DDX59	453
DDX60	1138
DDX60L	1348
DEAF1	712
DEF6	364
DEF8	538
DENND1A	919
DENND1C	842
DENND2A	807
DENND2C	682
DENND2D	416
DENND3	1119
DENND4A	1018
DENND4B	1058
DENND4C	1536
DENND5A	805
DENND5B	804
DEPDC1	579
DEPDC1B	431
DEPDC5	1178
DEPTOR	365
DES	507
DET1	428
DGCR2	489
DGCR8	465
DGKA	534
[truncated: 7,235 more rows]

## Sheet: synonymous
Gene name	Number of synonymous mutations g
JUN	168
A1CF	214
A2M	925
A2ML1	524
A4GALT	201
AAAS	270
AACS	257
AADAC	122
AADACL2	124
AADACL3	150
AADACL4	124
AAK1	393
AARS2	364
AARSD1	7
AASDH	330
AASS	263
AATK	814
ABAT	223
ABCA1	802
ABCA10	423
ABCA12	798
ABCA13	1594
ABCA2	1380
ABCA3	785
ABCA4	855
ABCA5	428
ABCA6	432
ABCA7	1272
ABCA8	480
ABCA9	478
ABCB1	483
ABCB10	284
ABCB11	495
ABCB4	448
ABCB5	452
ABCB6	479
ABCB7	184
ABCB8	293
ABCB9	418
ABCC1	733
ABCC10	874
ABCC11	514
ABCC12	472
ABCC2	508
ABCC3	574
ABCC4	508
ABCC5	516
ABCC6	691
ABCC8	723
ABCC9	508
ABCD1	393
ABCD2	228
ABCD3	184
ABCD4	325
ABCE1	146
ABCF1	259
ABCF2	239
ABCF3	280
ABCG1	365
ABCG2	225
ABCG4	256
ABCG5	529
ABCG8	322
ABHD16A	211
ABHD2	172
ABHD8	344
ABI3	162
ABI3BP	532
ABL1	495
ABL2	441
ABLIM1	296
ABLIM2	357
ABLIM3	240
ABR	538
ABRA	140
ABTB1	237
ABTB2	410
ACACB	963
ACAD10	374
ACAD11	402
ACAD9	287
ACADS	204
ACAN	920
ACAP1	485
ACAP2	207
ACAP3	765
ACBD3	180
ACBD5	218
ACCS	226
ACCSL	193
ACD	757
ACE	712
ACE2	133
ACHE	412
ACIN1	597
ACKR3	206
ACLY	393
ACMSD	123
ACO1	274
ACO2	561
ACOT11	219
ACOT12	276
ACOX1	256
ACOX2	246
ACOX3	467
ACOXL	270
ACRBP	181
ACSBG1	361
ACSBG2	220
ACSF2	206
ACSF3	596
ACSL1	255
ACSL3	220
ACSL4	133
ACSL5	278
ACSL6	261
ACSM1	208
ACSM2A	234
ACSM2B	258
ACSM3	482
ACSM4	254
ACSM5	253
ACSS1	327
ACSS2	198
ACSS3	238
ACTA1	263
ACTB	297
ACTBL2	127
ACTC1	227
ACTG1	792
ACTG2	151
ACTL6B	169
ACTL7A	172
ACTL7B	215
ACTL8	179
ACTL9	185
ACTN1	415
ACTN2	410
ACTN4	488
ACTR1B	194
ACTR5	238
ACTR8	386
ACTRT1	89
ACTRT2	198
ACVR1	177
ACVR1B	193
ACVR1C	160
ACVR2A	142
ACVR2B	231
ACVRL1	229
ADAD1	158
ADAD2	455
ADAM10	209
ADAM11	306
ADAM12	340
ADAM15	392
ADAM17	398
ADAM18	236
ADAM19	314
ADAM2	218
ADAM20	214
ADAM21	270
ADAM22	350
ADAM23	253
ADAM28	279
ADAM29	277
ADAM30	266
ADAM32	239
ADAM33	490
ADAM7	232
ADAM9	379
ADAMDEC1	153
ADAMTS1	379
ADAMTS10	537
ADAMTS12	552
ADAMTS13	784
ADAMTS14	519
ADAMTS15	423
ADAMTS16	477
ADAMTS17	691
ADAMTS18	635
ADAMTS19	389
ADAMTS2	542
ADAMTS20	523
ADAMTS3	344
ADAMTS4	598
ADAMTS5	389
ADAMTS6	337
ADAMTS7	883
ADAMTS8	405
ADAMTS9	741
ADAMTSL1	889
ADAMTSL2	451
ADAMTSL3	567
ADAMTSL4	479
ADAR	484
ADARB1	283
ADARB2	389
ADAT1	182
ADCK1	215
ADCK2	236
ADCK5	493
ADCY1	476
ADCY10	517
ADCY2	374
ADCY3	457
ADCY4	459
ADCY5	586
ADCY6	452
ADCY7	506
ADCY8	485
ADCY9	686
ADCYAP1R1	185
ADD1	264
ADD2	324
ADD3	210
ADGB	431
ADH1A	121
ADH1B	160
ADH6	114
ADH7	139
ADHFE1	162
ADNP	408
ADNP2	450
ADORA1	146
ADORA2A	171
ADORA3	246
ADRA1A	317
ADRA1B	243
ADRA1D	280
ADRA2A	223
ADRB2	190
ADSL	153
AEBP1	503
AFAP1	555
AFAP1L1	283
AFAP1L2	375
AFF1	454
AFF2	301
AFF3	528
AFF4	325
AFG3L2	295
AFM	185
AFP	190
AFTPH	234
AGAP1	604
AGAP2	508
AGAP3	548
AGAP5	226
AGAP6	242
AGBL1	527
AGBL2	260
AGBL3	330
AGBL4	204
AGBL5	358
AGFG2	181
AGGF1	234
AGK	150
AGL	448
AGMO	204
AGPAT4	139
AGPS	214
AGRN	1279
AGT	254
AGTPBP1	386
AGTR1	139
AGTR2	80
AGXT	192
AGXT2	183
AHCTF1	653
AHCY	254
AHCYL2	212
AHDC1	740
AHI1	367
AHNAK	2038
AHNAK2	3766
AHR	270
AHSG	138
AICDA	92
AIFM1	299
AIFM3	257
AIM2	96
AIPL1	196
AIRE	275
AJAP1	195
AK5	202
AK7	241
AK8	221
AKAP1	313
AKAP11	550
AKAP12	586
AKAP13	1016
AKAP17A	357
AKAP3	258
AKAP4	176
AKAP6	678
AKAP8	308
AKAP8L	315
AKAP9	1050
AKNA	539
AKNAD1	221
AKR1D1	105
AKT1	235
AKT2	196
AKT3	140
ALAS1	234
ALAS2	182
ALB	274
ALCAM	199
ALDH16A1	443
ALDH18A1	246
ALDH1A1	178
ALDH1A2	194
ALDH1A3	197
ALDH1B1	213
ALDH1L1	380
ALDH1L2	263
ALDH2	230
ALDH3A1	294
ALDH3B2	181
ALDH4A1	307
ALDH5A1	288
ALDH6A1	380
ALDH8A1	182
ALDOB	194
ALG1	331
ALG10	131
ALG10B	121
ALG13	297
ALG9	219
ALK	800
ALKBH8	185
ALLC	195
ALOX12	264
ALOX12B	257
ALOX15	291
ALOX15B	290
ALOX5	298
ALOXE3	349
ALPI	263
ALPK1	398
ALPK2	716
ALPK3	677
ALPL	239
ALPP	265
ALS2	494
ALS2CL	454
ALX1	101
ALX4	230
AMACR	159
AMBN	146
AMBP	124
AMBRA1	467
AMDHD1	179
AMDHD2	392
AMER1	265
AMFR	214
AMHR2	230
AMIGO2	338
AMOT	237
AMOTL1	363
AMOTL2	330
AMPD1	231
AMPD2	408
AMPD3	283
AMPH	386
AMY2B	177
AMZ1	792
ANAPC1	560
ANAPC2	639
ANAPC4	220
ANAPC5	257
ANAPC7	207
ANGEL1	228
ANGPT1	137
ANGPT2	454
ANGPT4	204
ANGPTL1	192
ANGPTL2	193
ANGPTL4	189
ANGPTL5	116
ANK1	846
ANK2	1344
ANK3	1473
ANKAR	661
ANKFN1	400
ANKFY1	488
ANKH	286
ANKHD1	3
ANKHD1-EIF4EBP3	112
ANKIB1	271
ANKK1	349
ANKLE1	310
ANKLE2	412
ANKMY1	605
ANKRD11	1561
ANKRD12	627
ANKRD13B	245
ANKRD13C	315
ANKRD13D	331
ANKRD17	805
ANKRD18A	334
ANKRD18B	307
ANKRD24	715
ANKRD26	557
ANKRD27	547
ANKRD28	102
ANKRD30A	504
ANKRD30B	500
ANKRD31	414
ANKRD33	226
ANKRD34A	189
ANKRD34B	138
ANKRD34C	165
ANKRD35	381
ANKRD36	581
ANKRD36C	636
ANKRD44	341
ANKRD50	458
ANKRD52	436
ANKRD55	218
ANKRD6	275
ANKS1A	505
ANKS1B	404
ANKS3	362
ANKS4B	121
ANKS6	359
ANKZF1	306
ANLN	308
ANO1	425
ANO10	238
ANO2	372
ANO3	301
ANO4	309
ANO5	289
ANO6	320
ANO7	589
ANO8	653
ANO9	545
ANP32C	87
ANTXR1	249
ANTXR2	166
ANXA10	107
ANXA13	148
ANXA6	240
AOAH	259
AOC2	296
AOC3	336
AOX1	426
AP1B1	417
AP1G1	268
AP1G2	381
AP1M1	187
AP2A1	502
AP2A2	406
AP2M1	162
AP3B1	297
AP3B2	412
AP3D1	568
AP4B1	278
AP4E1	349
AP4M1	323
AP5B1	475
APAF1	393
APBA1	406
APBA2	334
APBB1	276
APBB1IP	256
APBB2	280
APBB3	262
APC	1503
APC2	1322
APCDD1	251
APCDD1L	252
APCS	101
APEH	326
APEX2	151
APLNR	192
APLP1	290
APLP2	276
APOA4	192
APOA5	254
APOB	1721
APOBR	472
APOH	127
APOL5	164
APP	281
APPBP2	172
APPL1	203
APPL2	215
AQP10	172
AQP7	170
AQP8	106
AQR	412
AR	315
ARAF	187
ARAP1	620
ARAP2	482
ARAP3	549
ARC	193
ARFGAP2	305
ARFGEF1	485
ARFGEF2	510
ARHGAP10	272
ARHGAP11A	267
ARHGAP12	246
ARHGAP15	171
ARHGAP17	315
ARHGAP18	214
ARHGAP20	353
ARHGAP21	672
ARHGAP22	435
ARHGAP24	257
ARHGAP25	217
ARHGAP26	339
ARHGAP27	447
ARHGAP28	264
ARHGAP29	318
ARHGAP30	415
ARHGAP31	450
ARHGAP32	682
ARHGAP33	640
ARHGAP35	448
ARHGAP36	100
ARHGAP39	660
ARHGAP4	376
ARHGAP40	239
ARHGAP42	240
ARHGAP44	346
ARHGAP5	426
ARHGAP6	367
ARHGAP9	443
ARHGEF1	370
ARHGEF10	684
ARHGEF10L	615
ARHGEF11	666
ARHGEF12	391
ARHGEF15	354
ARHGEF16	319
ARHGEF17	920
ARHGEF18	694
ARHGEF19	316
ARHGEF2	402
ARHGEF25	267
ARHGEF26	380
ARHGEF3	293
ARHGEF33	476
ARHGEF37	219
ARHGEF4	729
ARHGEF40	615
ARHGEF5	409
ARHGEF6	160
ARHGEF7	353
ARHGEF9	133
ARID1A	924
ARID1B	972
ARID2	576
ARID3A	331
ARID3B	204
ARID3C	233
ARID4A	354
ARID4B	326
ARID5A	257
ARID5B	396
ARIH2	165
ARMC2	348
ARMC3	228
ARMC4	358
ARMC5	606
ARMC6	193
ARMC8	237
ARMC9	412
ARMCX1	100
ARMCX2	164
ARMCX5	101
ARNT	249
ARNT2	247
ARNTL	193
ARNTL2	175
ARPP21	288
ARRB1	192
ARSB	213
ARSD	213
ARSF	210
ARSG	657
ARSH	136
ARSI	226
ARSJ	205
ARVCF	609
ASAP1	400
ASAP2	427
ASAP3	316
ASB10	255
ASB15	195
ASB17	87
ASB2	310
ASB3	243
ASB4	153
ASB5	127
ASCC2	279
ASCC3	637
ASH1L	811
ASH2L	183
ASL	207
ASMT	172
ASMTL	376
ASNS	142
ASNSD1	199
ASPG	400
ASPH	316
ASPHD1	400
ASPM	1011
ASPRV1	149
ASPSCR1	375
ASS1	185
ASTE1	118
ASTL	403
ASTN1	479
ASTN2	599
ASXL1	558
ASXL2	454
ASXL3	721
ASZ1	130
ATAD2	418
ATAD2B	425
ATAD3A	336
ATAD3B	457
ATAD5	435
ATCAY	168
ATE1	224
ATF2	148
ATF6	234
ATF6B	311
ATF7	166
ATF7IP	369
ATF7IP2	265
ATG14	172
ATG16L1	205
ATG2A	864
ATG2B	633
ATG4D	208
ATG7	500
ATG9A	298
ATIC	213
ATL1	167
ATM	2316
ATMIN	309
ATN1	521
ATP10A	677
ATP10B	558
ATP10D	428
ATP11A	534
ATP11B	371
ATP11C	223
ATP12A	377
ATP13A1	596
ATP13A2	588
ATP13A3	344
ATP13A4	364
ATP13A5	439
ATP1A1	418
ATP1A2	400
ATP1A3	432
ATP1A4	395
ATP1B4	100
ATP2A1	479
ATP2A2	511
ATP2A3	611
ATP2B1	312
ATP2B2	591
ATP2B3	452
ATP2B4	420
ATP2C1	277
ATP2C2	647
ATP4A	438
ATP6AP1	183
ATP6V0A1	282
ATP6V0A2	307
ATP6V0A4	376
ATP6V0D2	118
ATP6V1A	167
ATP6V1B1	218
ATP6V1B2	195
ATP6V1C2	217
ATP6V1H	129
ATP7A	307
ATP7B	558
ATP8A1	373
ATP8A2	414
ATP8B1	415
ATP8B2	421
ATP8B3	612
ATP8B4	363
ATP9A	453
ATP9B	611
ATR	732
ATRIP	725
ATRN	466
ATRNL1	432
ATRX	518
ATXN1	481
ATXN2	373
ATXN2L	542
ATXN7	387
ATXN7L1	406
ATXN7L2	330
AURKA	140
AURKB	148
AURKC	100
AUTS2	571
AVIL	334
AVPR1A	176
AVPR1B	173
AXDND1	396
AXIN1	487
AXIN2	517
AXL	342
AZGP1	112
B2M	46
B3GALT1	103
B3GAT1	182
B3GAT2	313
B3GNT3	155
B3GNT7	179
B3GNT9	244
B3GNTL1	278
B4GALNT1	424
B4GALNT2	210
B4GALNT3	391
B4GALNT4	578
B4GALT5	136
BAAT	128
BACE1	185
BACE2	192
BACH1	206
BACH2	334
BAG3	240
BAG6	708
BAHCC1	1406
BAHD1	311
BAIAP2	412
BAIAP2L1	408
BAIAP3	657
BANK1	224
BANP	309
BAP1	402
BARD1	509
BARHL1	153
BARHL2	169
BASP1	119
BAZ1A	406
BAZ1B	452
BAZ2A	591
BAZ2B	624
BBS1	397
BBS10	197
BBS12	216
BBS2	358
BBS7	178
BBS9	293
BBX	354
BCAM	308
BCAN	371
BCAR1	550
BCAR3	343
BCAS1	205
BCAS3	347
BCAT1	135
BCAT2	164
BCHE	151
BCKDHA	266
BCKDK	190
BCL11A	388
BCL11B	543
BCL2	135
BCL2L12	218
BCL6	246
BCL6B	217
BCL9	513
BCL9L	723
BCLAF1	546
BCO2	156
BCOR	566
BCORL1	465
BCR	853
BDKRB1	141
BDKRB2	176
BDP1	812
BEGAIN	348
BEND2	177
BEND3	385
BEND4	197
BEND5	314
BEST2	251
BEST3	229
BFSP1	246
BFSP2	148
BGN	122
BHLHB9	83
BHMT	176
BICC1	353
BICD1	347
BICD2	393
BIN1	281
BIN2	182
BIRC2	187
BIRC3	188
BIRC6	1584
BIVM	178
BLK	324
BLM	489
BLNK	201
BMP1	495
BMP10	150
BMP15	87
BMP2	166
BMP2K	469
BMP3	173
BMP4	162
BMP5	151
BMP6	250
BMP7	231
BMPER	245
BMPR1A	239
BMPR1B	158
BMPR2	267
BMS1	429
BMX	274
BNC1	321
BNC2	423
BOC	463
BPI	202
BPIFB4	272
BPTF	908
BRAF	290
BRAP	234
BRAT1	526
BRCA1	1096
BRCA2	1981
BRD1	577
BRD2	404
BRD3	363
BRD4	728
BRD7	202
BRD8	389
BRD9	463
BRDT	260
BRF1	733
BRIP1	622
BRPF1	464
BRPF3	417
BRS3	82
BRSK1	512
BRSK2	516
BRWD1	665
BRWD3	374
BSG	272
BSN	1460
BSND	126
BTAF1	509
BTBD11	466
BTBD16	212
BTBD17	240
BTBD2	323
BTBD3	180
BTBD7	393
BTBD9	195
BTK	185
BTN1A1	160
BTN2A1	225
BTN2A2	196
BTN3A1	153
BTN3A3	216
BTNL3	150
BTNL8	189
BTNL9	288
BTRC	226
BUB1	281
BUB1B	312
BUD13	197
BVES	104
C10orf120	99
C10orf71	498
C10orf90	295
C11orf80	442
C12orf4	130
C12orf40	223
C12orf42	194
C12orf50	140
C12orf56	216
C14orf39	173
C15orf39	404
C16orf46	156
C16orf71	311
C16orf78	84
C16orf89	233
C16orf96	382
C17orf80	369
C17orf97	254
C19orf44	238
C19orf57	344
C1orf112	377
C1orf116	200
C1orf127	297
C1orf141	141
C1orf167	439
C1orf87	185
C1orf94	225
C1QTNF2	150
C1R	258
C1RL	220
C1S	216
C2	480
C20orf194	358
C2CD2	324
C2CD2L	239
C2CD3	769
C2orf16	398
C2orf42	181
C2orf78	255
C3	765
C3AR1	150
C3orf20	328
C4BPA	194
C4orf50	498
C5	475
C5AR1	168
C5orf34	174
C6	358
C6orf118	214
C7	295
C7orf31	162
C8A	216
C8B	226
C8orf34	165
C9	186
C9orf131	341
C9orf43	275
C9orf50	223
CA10	109
CA4	147
CA8	112
CA9	167
CABIN1	818
CABP4	181
CABS1	127
CACHD1	392
CACNA1A	1138
CACNA1B	1041
CACNA1C	1063
CACNA1D	749
CACNA1E	857
CACNA1F	511
CACNA1G	1000
CACNA1H	2168
CACNA1I	1024
CACNA1S	755
CACNA2D1	339
CACNA2D2	681
CACNA2D3	393
CACNA2D4	494
CACNB1	251
CACNB2	512
CACNB3	171
CACNB4	166
CACNG2	122
CACNG3	142
CACNG4	144
CACNG5	114
CACNG7	155
CACNG8	217
CAD	883
CADM1	205
CADM2	174
CADM3	183
CADPS	547
CADPS2	410
CAGE1	264
CALB2	111
CALCOCO1	234
CALCR	168
CALCRL	122
CALD1	222
CALN1	123
CALR	220
CALR3	161
CAMK1D	170
CAMK1G	195
CAMK2A	177
CAMK2B	326
CAMK2G	247
CAMK4	161
CAMKK1	237
CAMKK2	270
CAMKV	194
CAMSAP1	662
CAMSAP2	340
CAMSAP3	604
CAMTA1	641
CAMTA2	719
CAND1	358
CAND2	574
CANT1	183
CANX	329
CAP2	147
CAPN1	266
CAPN10	341
CAPN11	256
CAPN12	400
CAPN13	249
CAPN14	225
CAPN2	280
CAPN3	314
CAPN5	339
CAPN6	155
CAPN7	252
CAPN9	242
CAPRIN1	217
CAPRIN2	355
CAPS2	362
CAPSL	83
CARD10	457
CARD11	562
CARD14	729
CARD6	257
CARD8	224
CARD9	455
CARM1	331
CARNS1	408
CARS2	295
CASC1	225
CASC3	222
CASD1	221
CASK	414
CASKIN1	790
CASKIN2	666
CASP2	248
CASP5	165
CASP8	176
CASP8AP2	541
CASQ1	129
CASQ2	145
CASR	488
CASS4	299
CAST	263
CASZ1	891
CATSPER1	286
CATSPER2	185
CATSPER3	131
CATSPER4	195
CATSPERB	285
CATSPERG	431
CBFA2T2	240
CBFA2T3	670
CBFB	78
CBL	321
CBLB	338
CBLC	224
CBLL1	189
CBLN2	107
CBLN4	85
CBS	308
CBX2	379
CBX4	267
CBX6	214
CBX8	204
CC2D1A	414
CC2D1B	323
CC2D2A	511
CCAR1	293
CCBE1	229
CCDC102A	314
CCDC102B	159
CCDC105	312
CCDC110	214
CCDC114	274
CCDC116	291
CCDC120	214
CCDC13	236
CCDC136	458
CCDC138	259
CCDC14	275
CCDC141	481
CCDC144A	406
CCDC146	281
CCDC148	196
CCDC15	243
CCDC150	363
CCDC151	195
CCDC157	638
CCDC158	322
CCDC166	196
CCDC175	245
CCDC18	569
CCDC27	338
CCDC28A	96
CCDC30	656
CCDC33	424
CCDC38	188
CCDC39	289
CCDC40	637
CCDC50	180
CCDC54	87
CCDC57	573
CCDC6	164
CCDC60	165
CCDC61	190
CCDC62	202
CCDC63	180
CCDC66	293
CCDC68	98
CCDC73	321
CCDC8	222
CCDC80	319
CCDC81	168
CCDC82	356
CCDC83	124
CCDC85A	346
CCDC87	579
CCDC88A	558
CCDC88B	780
CCDC88C	878
CCDC9	254
CCDC93	246
CCDC96	520
CCHCR1	376
CCIN	202
CCKAR	165
CCKBR	215
CCM2	225
CCNA1	153
CCNB3	273
CCND1	146
CCND2	126
CCND3	204
CCNE1	154
CCNF	325
CCNJL	248
CCNL1	192
CCNL2	312
CCNT1	234
CCNT2	231
CCP110	285
CCPG1	285
CCR2	146
CCR3	162
CCR4	139
CCR5	134
CCR6	136
CCR7	151
CCR9	238
CCSER2	313
CCT3	184
CCT5	209
CCT6A	306
CCT6B	296
CCT7	217
CCT8	166
CCT8L2	210
CD101	341
CD109	428
CD163	360
CD163L1	424
CD180	209
CD19	215
CD1A	133
CD1B	162
CD1C	129
CD1D	131
CD1E	158
CD2	128
CD200R1L	98
CD209	141
CD22	335
CD226	105
CD248	312
CD276	264
CD2AP	188
CD300LB	96
CD300LG	149
CD33	130
CD36	167
CD4	178
CD44	278
CD5	182
CD5L	133
CD6	264
CD79B	103
CD84	106
CD86	92
CD93	325
CD96	275
CDAN1	561
CDC14A	237
CDC16	222
CDC20B	235
CDC23	186
CDC25B	260
CDC27	313
CDC37	169
CDC40	184
CDC42BPA	515
CDC42BPB	750
CDC42BPG	862
CDC45	216
CDC5L	250
CDC7	156
CDC73	197
CDCA2	364
CDCA7	121
CDCA7L	193
CDCP1	300
CDCP2	232
CDH1	615
CDH10	252
CDH11	327
CDH12	270
CDH13	449
CDH15	459
CDH16	329
CDH17	272
CDH18	262
CDH19	263
CDH2	355
CDH20	336
CDH22	366
CDH23	1764
CDH24	404
CDH26	354
CDH3	391
CDH4	457
CDH5	357
CDH6	293
CDH7	305
CDH8	282
CDH9	289
CDHR1	466
CDHR2	780
CDHR3	373
CDHR4	343
CDHR5	803
CDK11A	392
CDK11B	449
CDK12	470
CDK13	573
CDK14	173
CDK15	153
CDK17	146
CDK18	199
CDK19	269
CDK5RAP1	217
CDK5RAP2	601
CDK6	106
CDK8	128
CDKAL1	205
CDKL2	153
CDKL5	359
CDKN1A	79
CDKN1B	254
CDKN2A	260
CDON	415
CDR1	69
CDRT1	253
CDS1	109
CDX4	74
CDYL	234
CDYL2	274
CEACAM1	192
CEACAM16	215
CEACAM18	125
CEACAM20	226
CEACAM5	286
CEACAM6	156
CEACAM7	94
CEACAM8	148
CEBPA	201
CEBPZ	456
CECR2	527
CEL	458
CELF1	270
CELF2	227
CELF3	184
CELF4	261
CELF5	218
CELF6	194
CELSR1	1605
CELSR2	1317
CELSR3	1291
CENPB	297
CENPE	678
CENPF	875
CENPI	128
CENPJ	460
CEP104	384
CEP112	287
CEP120	288
CEP128	330
CEP135	300
CEP152	499
CEP164	639
CEP170	437
CEP192	720
CEP250	796
CEP290	656
CEP350	821
CEP57	244
CEP63	199
CEP68	299
CEP70	188
CEP72	405
CEP76	181
CEP78	215
CEP85	232
CEP85L	275
CEP89	375
CEP95	290
CEP97	249
CER1	115
CERCAM	252
CERK	230
CERKL	216
CES1	230
CES2	368
CES3	205
CES4A	233
CES5A	250
CETN1	65
CETP	195
CFB	316
CFH	441
CFHR1	136
CFHR2	89
CFHR3	102
CFHR4	215
CFHR5	195
CFI	212
CFP	139
CFTR	506
CGN	369
CGNL1	477
CHAD	332
CHAF1A	421
CHAF1B	172
CHAT	324
CHD1	459
CHD1L	357
CHD2	560
CHD3	839
CHD4	641
CHD5	796
CHD6	795
CHD7	983
CHD8	773
CHD9	767
CHDH	313
CHEK1	186
CHEK2	457
CHERP	529
CHFR	293
CHGB	237
CHI3L1	168
CHIA	196
CHIT1	176
CHL1	445
CHM	144
CHML	410
CHN1	171
CHN2	258
CHPF	525
CHPF2	383
CHRD	530
CHRDL1	102
CHRDL2	221
CHRM1	174
CHRM2	144
CHRM3	237
CHRM4	217
CHRNA1	183
CHRNA10	235
CHRNA2	237
CHRNA3	253
CHRNA4	396
CHRNA5	158
CHRNA6	156
CHRNA9	171
CHRNB1	216
CHRNB2	246
CHRNB3	151
CHRNB4	284
CHRND	346
CHRNG	230
CHST1	200
CHST10	152
CHST11	140
CHST12	254
CHST13	180
CHST15	274
CHST2	251
CHST3	258
CHST4	125
CHST5	239
CHST6	229
CHST7	182
CHST8	186
CHST9	128
CHSY1	380
CHSY3	348
CHTF18	1437
CHUK	203
CIC	1114
CIITA	800
CILP	373
CILP2	615
CIT	691
CIZ1	354
CKAP2	219
CKAP2L	261
CKAP4	269
CKAP5	526
CKM	248
CKMT2	227
CLASP1	562
CLASP2	477
CLASRP	316
CLCA1	291
CLCA2	330
CLCA4	256
CLCN1	400
CLCN2	400
CLCN3	242
CLCN4	234
CLCN5	155
CLCN6	335
CLCN7	467
CLCNKA	323
CLCNKB	352
CLDN17	77
CLEC14A	512
CLEC16A	590
CLEC1A	87
CLEC3A	88
CLEC4F	244
CLEC4M	177
CLGN	139
CLIC5	178
CLIC6	346
CLINT1	173
CLIP1	455
CLIP2	532
CLIP3	236
CLIP4	229
CLK1	174
CLK2	183
CLK3	369
CLMN	348
CLN3	212
CLNK	162
CLOCK	347
CLP1	106
CLPB	280
CLPTM1	299
CLPTM1L	291
CLPX	179
CLSPN	346
CLSTN1	414
CLSTN2	378
CLSTN3	425
CLTC	424
CLTCL1	549
CLU	198
CLUL1	163
CLVS1	121
CLVS2	103
CMIP	411
CMKLR1	120
CMYA5	1172
CNBD1	137
CNDP1	187
CNDP2	193
CNGA1	272
CNGA2	182
CNGA3	280
CNGA4	215
CNGB1	526
CNGB3	253
CNKSR1	336
CNKSR2	207
CNKSR3	239
CNNM1	387
CNNM2	403
CNNM3	354
CNNM4	350
CNOT1	770
CNOT10	199
CNOT2	158
CNOT3	484
CNOT4	230
CNOT6	175
CNR1	206
CNST	369
CNTLN	551
CNTN1	326
CNTN2	454
CNTN3	333
CNTN4	391
CNTN5	393
CNTN6	426
CNTNAP1	852
CNTNAP2	509
CNTNAP3	482
CNTNAP3B	490
CNTNAP4	503
CNTNAP5	501
CNTRL	617
CNTROB	527
COASY	289
COBL	579
COBLL1	342
COCH	198
COG1	373
COG2	234
COG3	249
COG4	354
COG5	522
COG6	218
COG7	256
COG8	847
COIL	174
COL10A1	436
COL11A1	621
COL11A2	726
COL12A1	993
COL13A1	333
COL14A1	590
COL15A1	514
COL16A1	615
COL17A1	568
COL18A1	1397
COL19A1	392
COL1A1	660
COL1A2	564
COL20A1	761
COL21A1	343
COL22A1	659
COL23A1	274
COL24A1	509
COL25A1	235
COL27A1	820
COL28A1	393
COL2A1	601
COL3A1	594
COL4A1	682
COL4A2	807
COL4A3	516
COL4A4	675
COL4A5	371
COL4A6	427
COL5A1	865
COL5A2	485
COL5A3	730
COL6A1	582
COL6A2	762
COL6A3	1259
COL6A5	714
COL6A6	660
COL7A1	1105
COL8A1	252
COL8A2	360
COL9A1	389
COL9A2	302
COL9A3	464
COLEC10	89
COLEC11	257
COLEC12	263
COLQ	168
COMP	308
COPA	345
COPB1	245
COPB2	290
COPS2	108
CORIN	354
CORO1A	232
CORO1B	536
CORO1C	162
CORO2A	201
CORO2B	171
CORO6	226
CORO7	827
COX10	202
CP	372
CPA1	164
CPA2	133
CPA3	120
CPA4	159
CPA5	202
CPA6	130
CPAMD8	847
CPB1	125
CPB2	157
CPD	400
CPE	150
CPEB2	473
CPEB3	281
CPEB4	210
CPED1	353
CPN1	191
CPN2	255
CPNE1	175
CPNE2	228
CPNE3	160
CPNE4	204
CPNE5	310
CPNE6	388
CPNE7	436
CPNE8	181
CPNE9	252
CPS1	632
CPSF2	189
CPSF3	204
CPSF6	193
CPT1A	297
CPT1B	385
CPT1C	396
CPVL	149
CPXCR1	55
CPXM1	290
CPXM2	294
CPZ	494
CR1	623
CR1L	212
CR2	344
CRAT	309
CRB1	478
CRB2	639
CREB3L1	230
CREB3L2	202
CREB3L3	225
CREB5	299
CREBBP	1095
CRHBP	105
CRHR1	180
CRHR2	185
CRIM1	439
CRISP1	92
CRISP2	85
CRISP3	101
CRISPLD1	130
CRISPLD2	252
CRLF2	148
CRMP1	261
CRNKL1	433
CRNN	174
CROCC	1099
CROT	159
CRP	91
CRTAC1	439
CRTAM	125
CRTC1	382
CRTC2	443
CRTC3	264
CRX	138
CRY1	204
CRY2	222
CRYBB1	101
CRYBG3	710
CS	113
CSAD	247
CSDE1	213
CSE1L	295
CSF1	227
CSF1R	399
CSF2RA	229
CSF2RB	430
CSF3R	337
CSGALNACT1	264
CSGALNACT2	176
CSK	188
CSMD1	2393
CSMD2	1504
CSMD3	1153
CSNK1A1	64
CSNK1A1L	125
CSNK1G2	273
CSNK2A1	116
CSPG4	967
CSPG5	219
CSPP1	430
CSRNP1	253
CSRNP2	295
CSRNP3	198
CSTF1	163
CSTF2	114
CSTF3	174
CT47B1	193
CTAGE1	241
CTBP1	230
CTBP2	603
CTC1	465
CTCF	243
CTCFL	323
CTDP1	585
CTIF	274
CTNNA1	377
CTNNA2	362
CTNNA3	304
CTNNAL1	256
CTNNB1	242
CTNNBL1	180
CTNND1	269
CTNND2	528
CTPS2	153
CTR9	363
CTSA	530
CTSC	187
CTSD	212
CTSE	179
CTSG	103
CTTN	291
CTTNBP2	522
CTTNBP2NL	197
CTU2	589
CUBN	1250
CUL1	239
CUL2	216
CUL3	254
CUL4A	336
CUL4B	194
CUL5	241
CUL7	784
CUL9	864
CUX1	838
CUX2	641
CUZD1	170
CWC22	243
CWF19L2	235
CWH43	241
CX3CR1	145
CXCR1	145
CXCR2	175
CXCR4	115
CXorf66	76
CXXC1	207
CYB5R4	145
CYBB	138
CYFIP2	563
CYLC1	141
CYLC2	99
CYLD	255
CYP11A1	177
CYP11B1	270
CYP11B2	248
CYP17A1	192
CYP19A1	169
CYP1A1	185
CYP1A2	206
CYP1B1	280
CYP24A1	193
CYP26A1	206
CYP26B1	243
CYP26C1	239
CYP27A1	225
CYP27C1	165
CYP2A13	227
CYP2A6	274
CYP2A7	267
CYP2B6	213
CYP2C18	174
CYP2C19	227
CYP2C8	160
CYP2C9	215
CYP2D6	344
CYP2E1	192
CYP2F1	263
CYP2S1	211
CYP2W1	635
CYP39A1	215
CYP3A4	141
CYP3A43	162
CYP3A5	290
CYP3A7	304
CYP46A1	216
CYP4A11	199
CYP4A22	196
CYP4B1	203
CYP4F11	244
CYP4F12	234
CYP4F2	245
CYP4F22	188
CYP4F3	231
CYP4F8	218
CYP4V2	163
CYP4X1	181
CYP4Z1	132
CYP7A1	147
CYP7B1	193
CYP8B1	162
CYSLTR1	95
CYSLTR2	95
CYTH3	231
CYTH4	150
CYTIP	106
D2HGDH	473
DAAM1	317
DAAM2	412
DAB1	190
DAB2	251
DAB2IP	621
DACH2	133
DACT1	390
DACT2	333
DAG1	364
DAGLA	455
DAGLB	349
DAO	115
DAPK1	600
DAPK3	270
DARS2	173
DAXX	183
DAZAP1	250
DBF4	192
DBF4B	318
DBH	289
DBN1	305
DBX2	179
DCAF12	146
DCAF12L1	169
DCAF12L2	151
DCAF13	198
DCAF15	339
DCAF4	223
DCAF4L1	172
DCAF4L2	169
DCAF5	316
DCAF6	330
DCAF8L1	177
DCAF8L2	173
DCBLD1	295
DCBLD2	270
DCC	531
DCDC1	589
DCDC2	188
DCHS1	1334
DCHS2	1232
DCLK1	273
DCLK2	298
DCLK3	230
DCLRE1A	310
DCLRE1B	203
DCLRE1C	474
DCN	140
DCP1B	241
DCST1	306
DCST2	303
DCT	186
DCTN1	469
DCX	88
DDB1	408
DDC	206
DDHD1	331
DDHD2	373
DDN	373
DDO	142
DDR1	358
DDR2	291
DDX1	195
DDX10	257
DDX11	473
DDX17	242
DDX18	201
DDX20	359
DDX21	184
DDX23	247
DDX24	336
DDX27	242
DDX31	447
DDX39A	217
DDX3X	245
DDX4	194
DDX41	301
DDX42	258
DDX43	206
DDX46	290
DDX5	238
DDX50	222
DDX51	524
DDX53	155
DDX54	567
DDX55	247
DDX56	242
DDX58	228
DDX59	190
DDX60	453
DDX60L	499
DEAF1	424
DEF6	221
DEF8	273
DENND1A	511
DENND1C	377
DENND2A	384
DENND2C	211
DENND2D	197
DENND3	637
DENND4A	462
DENND4B	609
DENND4C	610
DENND5A	438
DENND5B	428
DEPDC1	195
DEPDC1B	174
DEPDC5	583
DEPTOR	133
DES	299
DET1	213
DGCR2	228
DGCR8	285
DGKA	264
DGKB	300
DGKD	571
DGKE	369
DGKG	297
DGKH	407
DGKI	371
DGKK	295
DGKQ	580
DGKZ	684
DHCR7	320
DHDH	153
DHRS2	160
DHRS7C	138
DHTKD1	378
DHX15	232
DHX16	395
DHX29	455
DHX30	564
DHX32	440
DHX33	255
DHX34	544
DHX35	245
DHX36	298
DHX37	542
DHX38	542
DHX40	203
DHX57	464
DHX58	233
DHX8	377
DHX9	416
DIAPH1	450
DIAPH2	228
DIAPH3	422
DICER1	860
DIDO1	998
DIO3	153
DIP2A	719
DIP2B	508
DIP2C	1101
DIRAS3	96
DIS3	377
DIS3L	299
DIS3L2	375
DISC1	386
DISP1	466
DISP2	644
DIXDC1	231
DKK2	85
DLAT	297
DLC1	824
DLEC1	757
DLG1	264
DLG2	510
DLG3	238
DLG4	588
DLG5	815
DLGAP1	429
DLGAP2	712
DLGAP3	432
DLGAP4	415
DLGAP5	230
DLK1	179
DLL1	456
DLL3	344
DLL4	252
DLX5	116
DMBT1	909
DMBX1	154
DMD	1044
DMGDH	328
DMKN	213
DMP1	150
DMPK	520
DMRT1	287
DMRT2	275
DMRT3	260
DMRTA1	228
DMRTB1	174
DMRTC2	222
DMTF1	265
DMWD	372
DMXL1	977
DMXL2	846
[truncated: 7,150 more rows]

## Sheet: nonsense
Gene name	Number of nonsense mutations g
JUN	5
CS	6
A1BG	15
A1CF	25
A2M	36
A2ML1	53
A4GALT	14
AAAS	23
AACS	20
AADAC	13
AADACL2	25
AADACL3	10
AADACL4	10
AAK1	15
AARS2	42
AASDH	43
AASS	27
AATK	29
ABAT	12
ABCA1	46
ABCA10	65
ABCA12	56
ABCA13	207
ABCA2	29
ABCA3	38
ABCA4	120
ABCA5	52
ABCA6	55
ABCA7	106
ABCA8	68
ABCA9	74
ABCB1	35
ABCB10	22
ABCB11	46
ABCB4	40
ABCB5	70
ABCB6	40
ABCB7	2
ABCB8	22
ABCB9	24
ABCC1	24
ABCC10	69
ABCC11	45
ABCC12	60
ABCC2	62
ABCC3	39
ABCC4	26
ABCC5	30
ABCC6	85
ABCC8	48
ABCC9	29
ABCD1	28
ABCD2	19
ABCD3	12
ABCD4	29
ABCE1	8
ABCF1	27
ABCF2	14
ABCF3	16
ABCG1	22
ABCG2	30
ABCG4	14
ABCG5	32
ABCG8	36
ABHD16A	10
ABHD2	8
ABHD8	3
ABI3	11
ABI3BP	48
ABL1	6
ABL2	23
ABLIM1	13
ABLIM2	17
ABLIM3	15
ABR	20
ABRA	15
ABTB1	18
ABTB2	24
ACACB	67
ACAD10	49
ACAD11	48
ACAD9	18
ACADS	17
ACAN	34
ACAP1	29
ACAP2	13
ACAP3	31
ACBD3	9
ACBD5	13
ACD	33
ACE	68
ACE2	7
ACHE	11
ACIN1	18
ACKR3	3
ACLY	22
ACMSD	13
ACO1	25
ACO2	12
ACOT11	30
ACOT12	19
ACOX1	19
ACOX2	26
ACOX3	37
ACOXL	30
ACRBP	24
ACTA1	14
ACTB	2
ACTBL2	23
ACTC1	4
ACTG1	20
ACTG2	5
ACTL6B	14
ACTL7A	16
ACTL7B	15
ACTL8	5
ACTL9	15
ACTN1	14
ACTN2	21
ACTN4	8
ACTR1B	10
ACTR5	17
ACTR8	46
ACTRT1	6
ACTRT2	12
ACVR1	13
ACVR1B	5
ACVR1C	14
ACVR2A	1
ACVR2B	6
ACVRL1	28
ACSBG1	23
ACSBG2	19
ACCS	22
ACCSL	25
ACSF2	14
ACSF3	57
ACSL1	20
ACSL3	9
ACSL4	4
ACSL5	15
ACSL6	15
ACSM1	36
ACSM2A	40
ACSM2B	42
ACSM3	46
ACSM4	22
ACSM5	24
ACSS1	25
ACSS2	20
ACSS3	19
ADAD1	12
ADAD2	35
ADAM10	5
ADAM11	19
ADAM12	14
ADAM15	40
ADAM17	15
ADAM18	39
ADAM19	21
ADAM2	31
ADAM20	27
ADAM21	28
ADAM22	26
ADAM23	11
ADAM28	33
ADAM29	29
ADAM30	22
ADAM32	33
ADAM33	51
ADAM7	27
ADAM9	19
ADAMDEC1	20
ADAMTS1	14
ADAMTS10	21
ADAMTS12	62
ADAMTS13	68
ADAMTS14	43
ADAMTS15	20
ADAMTS16	30
ADAMTS17	48
ADAMTS18	62
ADAMTS19	40
ADAMTS2	17
ADAMTS20	78
ADAMTS3	29
ADAMTS4	32
ADAMTS5	25
ADAMTS6	11
ADAMTS7	55
ADAMTS8	32
ADAMTS9	29
ADAMTSL1	49
ADAMTSL2	26
ADAMTSL3	54
ADAMTSL4	60
ADAR	31
ADARB1	7
ADARB2	5
ADAT1	26
ADCK1	31
ADCK2	15
ADCK5	18
ADCY1	10
ADCY10	64
ADCY2	3
ADCY3	23
ADCY4	41
ADCY5	208
ADCY6	17
ADCY7	18
ADCY8	19
ADCY9	15
ADCYAP1R1	17
ADD1	8
ADD2	11
ADD3	5
ADGB	51
ADH1A	5
ADH1B	10
ADH6	12
ADH7	10
ADHFE1	7
ADNP	18
ADNP2	10
ADORA1	4
ADORA2A	4
ADORA3	9
ADRA1A	32
ADRA1B	12
ADRA1D	22
ADRA2A	11
ADRB2	17
ADSL	20
AEBP1	34
AFAP1	27
AFAP1L1	29
AFAP1L2	26
AFF1	13
AFF2	5
AFF3	11
AFF4	3
AFG3L2	26
AFM	30
AFP	19
AFTPH	7
AGAP1	18
AGAP2	201
AGAP3	14
AGAP5	21
AGAP6	26
AGBL1	62
AGBL2	40
AGBL3	39
AGBL4	16
AGBL5	18
AGFG2	9
AGGF1	14
AGK	20
AGL	71
AGMO	26
AGPAT4	7
AGPS	7
AGRN	27
AGT	19
AGTPBP1	22
AGTR1	11
AGTR2	7
AGXT	32
AGXT2	26
AHCTF1	12
AHCY	14
AHCYL2	9
AHDC1	22
AHI1	58
AHNAK	33
AHNAK2	127
AHR	9
AHSG	8
AICDA	13
AIFM1	5
AIFM3	20
AIM2	12
AIPL1	18
AIRE	25
AJAP1	2
AK5	8
AK7	32
AK8	20
AKAP1	13
AKAP11	15
AKAP12	17
AKAP13	36
AKAP17A	10
AKAP3	19
AKAP4	4
AKAP6	21
AKAP8	8
AKAP8L	12
AKAP9	102
AKNA	20
AKNAD1	34
AKR1D1	11
AKT1	3
AKT2	8
AKT3	4
ALAS1	11
ALAS2	2
ALB	15
ALCAM	5
ALDH16A1	31
ALDH18A1	18
ALDH1A1	4
ALDH1A2	7
ALDH1A3	7
ALDH1B1	17
ALDH1L1	17
ALDH1L2	26
ALDH2	12
ALDH3A1	27
ALDH3B2	14
ALDH4A1	15
ALDH5A1	12
ALDH6A1	30
ALDH8A1	14
ALDOB	19
ALG1	34
ALG10	19
ALG10B	20
ALG13	11
ALG9	19
ALK	43
ALKBH8	14
ALLC	21
ALOX12	38
ALOX12B	17
ALOX15	33
ALOX15B	31
ALOX5	21
ALOXE3	41
ALPI	26
ALPK1	52
ALPK2	64
ALPK3	56
ALPL	24
ALPP	19
ALS2	46
ALS2CL	60
ALX1	4
ALX4	15
AMACR	11
AMBN	8
AMBP	13
AMBRA1	19
AMDHD1	11
AMDHD2	32
AMER1	16
AMFR	17
AMHR2	39
AMIGO2	3
AMOT	7
AMOTL1	18
AMOTL2	12
AMPD1	30
AMPD2	21
AMPD3	16
AMPH	29
AMY2B	29
AMZ1	56
ANAPC1	26
ANAPC2	13
ANAPC4	17
ANAPC5	18
ANAPC7	13
ANGEL1	26
ANGPT1	5
ANGPT2	8
ANGPT4	23
ANGPTL1	23
ANGPTL2	12
ANGPTL4	20
ANGPTL5	20
ANK1	19
ANK2	26
ANK3	21
ANKAR	81
ANKFN1	33
ANKFY1	16
ANKH	3
ANKHD1-EIF4EBP3	10
ANKIB1	7
ANKK1	38
ANKLE1	31
ANKLE2	23
ANKMY1	58
ANKRD11	67
ANKRD12	26
ANKRD13B	12
ANKRD13C	11
ANKRD13D	10
ANKRD17	7
ANKRD18A	46
ANKRD18B	43
ANKRD24	46
ANKRD26	68
ANKRD27	48
ANKRD28	13
ANKRD30A	69
ANKRD30B	73
ANKRD31	49
ANKRD33	30
ANKRD34A	2
ANKRD34B	25
ANKRD34C	5
ANKRD35	54
ANKRD36	94
ANKRD36C	64
ANKRD44	7
ANKRD50	18
ANKRD52	6
ANKRD55	27
ANKRD6	29
ANKS1A	17
ANKS1B	14
ANKS3	18
ANKS4B	12
ANKS6	30
ANKZF1	44
ANLN	21
ANO1	17
ANO10	36
ANO2	38
ANO3	46
ANO4	35
ANO5	57
ANO6	42
ANO7	79
ANO8	24
ANO9	36
ANP32C	10
ANPEP	23
ANTXR1	8
ANTXR2	13
ANXA10	14
ANXA13	15
ANXA6	15
AOAH	32
AOC2	32
AOC3	30
AOX1	49
AP1B1	4
AP1G1	5
AP1G2	34
AP1M1	6
AP2A1	11
AP2A2	5
AP3B1	19
AP3B2	17
AP3D1	13
AP4B1	27
AP4E1	21
AP4M1	24
AP5B1	32
APAF1	27
APBA1	11
APBA2	9
APBB1	10
APBB1IP	4
APBB2	10
APBB3	14
APC	272
APC2	26
APCDD1	14
APCDD1L	14
APCS	15
APEH	39
APEX2	1
APLNR	3
APLP1	11
APLP2	12
APOA4	20
APOA5	15
APOB	114
APOBR	42
APOH	12
APOL5	23
APP	12
APPBP2	3
APPL1	15
APPL2	25
AQP10	8
AQP7	23
AQP8	5
AQR	15
AR	32
ARAF	6
ARAP1	27
ARAP2	35
ARAP3	26
ARC	9
ARFGAP2	17
ARFGEF1	11
ARFGEF2	17
ARHGAP10	19
ARHGAP11A	32
ARHGAP12	20
ARHGAP15	17
ARHGAP17	11
ARHGAP18	24
ARHGAP20	19
ARHGAP21	35
ARHGAP22	23
ARHGAP24	24
ARHGAP25	15
ARHGAP26	21
ARHGAP27	29
ARHGAP28	23
ARHGAP29	19
ARHGAP30	7
ARHGAP31	14
ARHGAP32	23
ARHGAP33	26
ARHGAP35	7
ARHGAP36	1
ARHGAP39	24
ARHGAP4	7
ARHGAP40	21
ARHGAP42	10
ARHGAP44	10
ARHGAP5	14
ARHGAP6	16
ARHGAP9	37
ARHGEF1	19
ARHGEF10	57
ARHGEF10L	18
ARHGEF11	12
ARHGEF12	12
ARHGEF15	16
ARHGEF16	22
ARHGEF17	33
ARHGEF18	34
ARHGEF19	38
ARHGEF2	20
ARHGEF25	21
ARHGEF26	33
ARHGEF3	29
ARHGEF33	16
ARHGEF37	26
ARHGEF4	49
ARHGEF40	45
ARHGEF5	61
ARHGEF6	7
ARHGEF7	7
ARHGEF9	7
ARID1A	19
ARID1B	462
ARID2	26
ARID3A	8
ARID3B	7
ARID3C	18
ARID4A	17
ARID4B	9
ARID5A	9
ARID5B	5
ARIH2	8
ARMC2	23
ARMC3	33
ARMC4	48
ARMC5	26
ARMC6	19
ARMC8	4
ARMC9	42
ARMCX1	4
ARMCX2	1
ARMCX5	7
ARNT	6
ARNT2	7
ARNTL	7
ARNTL2	18
ARPP21	20
ARRB1	3
ARSB	33
ARSD	14
ARSF	20
ARSG	22
ARSH	18
ARSI	28
ARSJ	31
ARVCF	31
ASAP1	9
ASAP2	10
ASAP3	26
ASB10	25
ASB15	28
ASB17	11
ASB2	29
ASB3	29
ASB4	15
ASB5	18
ASCC2	15
ASCC3	62
ASH1L	17
ASH2L	8
ASL	17
ASMT	19
ASMTL	13
ASNS	20
ASNSD1	30
ASPG	32
ASPH	35
ASPHD1	19
ASPM	155
ASPRV1	8
ASPSCR1	20
ASS1	16
ASTE1	15
ASTL	24
ASTN1	19
ASTN2	19
ASXL1	104
ASXL2	9
ASXL3	42
ASZ1	12
ATAD2	17
ATAD2B	15
ATAD3A	29
ATAD3B	43
ATAD5	13
ATCAY	6
ATE1	15
ATF2	7
ATF6	18
ATF6B	36
ATF7	4
ATF7IP	9
ATF7IP2	11
ATG14	10
ATG16L1	11
ATG2A	33
ATG2B	35
ATG4D	14
ATG7	19
ATG9A	7
ATIC	20
ATL1	7
ATM	336
ATMIN	11
ATN1	9
ATP10A	30
ATP10B	67
ATP10D	37
ATP11A	19
ATP11B	30
ATP11C	18
ATP12A	21
ATP13A1	16
ATP13A2	39
ATP13A3	9
ATP13A4	32
ATP13A5	58
ATP1A1	5
ATP1A2	15
ATP1A3	5
ATP1A4	35
ATP1B4	8
ATP2A1	32
ATP2A2	10
ATP2A3	28
ATP2B1	4
ATP2B2	5
ATP2B3	10
ATP2B4	17
ATP2C1	13
ATP2C2	61
ATP4A	22
ATP6AP1	3
ATP6V0A1	6
ATP6V0A2	23
ATP6V0A4	29
ATP6V0D2	12
ATP6V1A	6
ATP6V1B1	29
ATP6V1B2	7
ATP6V1C2	16
ATP6V1H	16
ATP7A	50
ATP7B	67
ATP8A1	18
ATP8A2	36
ATP8B1	33
ATP8B2	21
ATP8B3	51
ATP8B4	58
ATP9A	16
ATP9B	50
ATR	53
ATRIP	23
ATRN	17
ATRNL1	33
ATRX	19
ATXN1	27
ATXN2	17
ATXN2L	9
ATXN7	7
ATXN7L1	14
ATXN7L2	6
AURKA	6
AURKB	9
AURKC	10
AUTS2	12
AVIL	36
AVPR1A	14
AVPR1B	14
AXDND1	46
AXIN1	23
AXIN2	14
AXL	13
AZGP1	9
B3GALT1	5
B3GAT1	7
B3GAT2	21
B3GNT3	6
B3GNT7	7
B3GNT9	16
B3GNTL1	30
B4GALNT1	34
B4GALNT2	17
B4GALNT3	29
B4GALNT4	27
B4GALT5	2
BAAT	15
BACE1	5
BACE2	5
BACH1	9
BACH2	8
BAG3	25
BAG6	27
BAHCC1	16
BAHD1	8
BAIAP2	14
BAIAP2L1	19
BAIAP3	55
BANK1	30
BANP	8
BAP1	30
BARD1	76
BARHL1	3
BARHL2	5
BASP1	1
BAZ1A	26
BAZ1B	12
BAZ2A	18
BAZ2B	30
BBS1	21
BBS10	39
BBS12	24
BBS2	51
BBS7	13
BBS9	37
BBX	21
BCAM	21
BCAN	31
BCAR1	12
BCAR3	12
BCAS1	6
BCAS3	19
BCAT1	19
BCAT2	19
BCHE	39
BCKDHA	26
BCKDK	13
BCL11A	18
BCL11B	8
BCL2	3
BCL2L12	15
BCL6	6
BCL6B	5
BCL9	7
BCL9L	14
BCLAF1	62
BCO2	27
BCOR	21
BCORL1	10
BCR	19
BDKRB1	12
BDKRB2	7
BDP1	70
BEGAIN	7
BEND2	7
BEND3	8
BEND4	7
BEND5	9
BEST2	21
BEST3	34
BFSP1	25
BFSP2	16
BGN	3
BHLHB9	4
BHMT	24
BICC1	15
BICD1	18
BICD2	10
BIN1	13
BIN2	17
BIRC2	8
BIRC3	9
BIRC6	29
BIVM	16
BLK	32
BLM	58
BLNK	7
BMP1	20
BMP10	5
BMP15	11
BMP2	7
BMP2K	22
BMP3	10
BMP4	8
BMP5	14
BMP6	4
BMP7	9
BMPER	18
BMPR1A	41
BMPR1B	5
BMPR2	93
BMS1	31
BMX	10
BNC1	7
BNC2	10
BOC	24
BPI	14
BPIFB4	25
BPTF	13
BRAF	13
BRAP	14
BRAT1	39
BRCA1	464
BRCA2	703
BRD1	14
BRD2	7
BRD3	6
BRD4	6
BRD7	8
BRD8	24
BRD9	20
BRDT	21
BRF1	36
BRIP1	93
BRPF1	11
BRPF3	11
BRS3	2
BRSK1	12
BRSK2	9
BRWD1	36
BRWD3	13
BSG	15
BSN	29
BSND	12
BTAF1	10
BTBD11	13
BTBD16	15
BTBD17	19
BTBD2	3
BTBD3	9
BTBD7	18
BTBD9	25
BTK	37
BTN1A1	13
BTN2A1	33
BTN2A2	21
BTN3A1	20
BTN3A3	27
BTNL3	17
BTNL8	23
BTNL9	27
BTRC	19
BUB1	25
BUB1B	29
BUD13	17
BVES	10
C10orf120	18
C10orf71	42
C10orf90	27
C11orf80	22
C12orf4	19
C12orf40	34
C12orf42	20
C12orf50	19
C12orf56	33
C14orf39	16
C15orf39	11
C16orf46	16
C16orf71	26
C16orf78	13
C16orf89	35
C16orf96	41
C17orf80	23
C17orf97	16
C19orf44	25
C19orf57	25
C1orf112	36
C1orf116	12
C1orf127	36
C1orf141	15
C1orf167	72
C1orf87	27
C1orf94	15
C1QTNF2	8
C1R	21
C1RL	26
C1S	17
C2	31
C20orf194	29
C2CD2	19
C2CD2L	5
C2CD3	56
C2orf16	49
C2orf42	16
C2orf78	27
C3	24
C3AR1	18
C3orf20	33
C4BPA	13
C4orf50	62
C5	52
C5AR1	12
C5orf34	29
C6	44
C6orf118	28
C7	32
C7orf31	22
C8A	31
C8B	36
C8orf34	16
C9	28
C9orf131	37
C9orf43	26
C9orf50	23
CA10	6
CA4	13
CA8	8
CA9	12
CABIN1	46
CABP4	21
CABS1	6
CACHD1	22
CACNA1A	59
CACNA1B	333
CACNA1C	353
CACNA1D	21
CACNA1E	17
CACNA1F	31
CACNA1G	18
CACNA1H	271
CACNA1I	28
CACNA1S	158
CACNA2D1	265
CACNA2D2	184
CACNA2D3	239
CACNA2D4	224
CACNB1	10
CACNB2	139
CACNB3	10
CACNB4	121
CACNG2	1
CACNG4	6
CACNG5	6
CACNG7	3
CACNG8	2
CAD	28
CADM1	2
CADM2	4
CADM3	7
CADPS	24
CADPS2	26
CAGE1	28
CALB2	8
CALCOCO1	17
CALCR	18
CALCRL	5
CALD1	8
CALN1	9
CALR	4
CALR3	20
CAMK1D	8
CAMK1G	11
CAMK2A	6
CAMK2B	12
CAMK2G	10
CAMK4	11
CAMKK1	6
CAMKK2	13
CAMKV	1
CAMSAP1	19
CAMSAP2	9
CAMSAP3	10
CAMTA1	24
CAMTA2	29
CAND1	6
CAND2	30
CANT1	15
CANX	24
CAP2	8
CAPN1	17
CAPN10	25
CAPN11	34
CAPN12	52
CAPN13	27
CAPN14	22
CAPN2	39
CAPN3	42
CAPN5	32
CAPN6	7
CAPN7	29
CAPN9	30
CAPRIN1	11
CAPRIN2	30
CAPS2	51
CAPSL	8
CARD10	20
CARD11	9
CARD14	42
CARD6	45
CARD8	17
CARD9	25
CARM1	4
CARNS1	27
CARS2	27
CASC1	28
CASC3	8
CASD1	13
CASK	40
CASKIN1	11
CASKIN2	13
CASP2	8
CASP5	15
CASP8	18
CASP8AP2	11
CASQ1	18
CASQ2	12
CASR	24
CASS4	8
CAST	15
CASZ1	8
CATSPER1	25
CATSPER2	21
CATSPER3	8
CATSPER4	24
CATSPERB	32
CATSPERG	42
CBFA2T2	8
CBFA2T3	21
CBFB	4
CBL	20
CBLB	10
CBLC	20
CBLL1	4
CBLN2	5
CBLN4	4
CBS	21
CBX2	11
CBX4	4
CBX6	1
CBX8	4
CC2D1A	15
CC2D1B	25
CC2D2A	71
CCAR1	21
CCBE1	24
CCDC102A	13
CCDC102B	28
CCDC105	17
CCDC110	44
CCDC114	26
CCDC116	21
CCDC120	9
CCDC13	20
CCDC136	58
CCDC138	28
CCDC14	39
CCDC141	82
CCDC144A	44
CCDC146	51
CCDC148	35
CCDC15	44
CCDC150	58
CCDC151	25
CCDC157	41
CCDC158	49
CCDC166	17
CCDC175	35
CCDC18	74
CCDC27	51
CCDC28A	13
CCDC30	51
CCDC33	50
CCDC38	25
CCDC39	29
CCDC40	60
CCDC50	20
CCDC54	16
CCDC57	62
CCDC6	6
CCDC60	21
CCDC61	21
CCDC62	26
CCDC63	22
CCDC66	65
CCDC68	13
CCDC73	40
CCDC8	15
CCDC80	18
CCDC81	31
CCDC82	31
CCDC83	13
CCDC85A	27
CCDC87	37
CCDC88A	16
CCDC88B	72
CCDC88C	49
CCDC9	16
CCDC93	19
CCDC96	33
CCHCR1	47
CCIN	10
CCKAR	8
CCKBR	16
CCM2	12
CCNA1	12
CCNB3	4
CCND1	4
CCND2	6
CCND3	12
CCNE1	3
CCNF	17
CCNJL	20
CCNL1	8
CCNL2	12
CCNT1	10
CCNT2	8
CCP110	23
CCPG1	26
CCR2	11
CCR3	8
CCR4	8
CCR5	17
CCR6	7
CCR7	2
CCR9	9
CCT3	2
CCT5	2
CCT6A	4
CCT6B	19
CCT7	3
CCT8	4
CCT8L2	18
CD101	37
CD109	58
CD163	29
CD163L1	68
CD180	16
CD19	10
CD1A	26
CD1B	23
CD1C	20
CD1D	12
CD1E	30
CD2	7
CD200R1L	10
CD209	28
CD22	21
CD226	5
CD248	16
CD276	19
CD2AP	8
CD300LB	11
CD300LG	11
CD33	13
CD36	55
CD4	7
CD44	17
CD5	13
CD5L	29
CD6	21
CD79B	7
CD84	6
CD86	4
CD93	29
CD96	27
CDAN1	32
CDC14A	18
CDC16	13
CDC20B	25
CDC23	8
CDC25B	7
CDC27	30
CDC37	5
CDC40	6
CDC42BPA	28
CDC42BPB	14
CDC42BPG	70
CDC45	14
CDC5L	5
CDC7	15
CDC73	19
CDCA2	21
CDCA7	8
CDCA7L	18
CDCP1	19
CDCP2	27
CDH1	48
CDH10	15
CDH11	4
CDH12	15
CDH13	11
CDH15	36
CDH16	25
CDH17	25
CDH18	13
CDH19	25
CDH2	21
CDH20	7
CDH22	17
CDH23	69
CDH24	32
CDH26	42
CDH3	19
CDH4	8
CDH5	18
CDH6	13
CDH7	12
CDH8	6
CDH9	12
CDHR1	43
CDHR2	41
CDHR3	42
CDHR4	37
CDHR5	45
CDK11A	49
CDK11B	19
CDK12	6
CDK13	23
CDK14	10
CDK15	20
CDK17	6
CDK18	17
CDK19	9
CDK5RAP1	26
CDK5RAP2	55
CDK6	2
CDK8	9
CDKAL1	15
CDKL2	27
CDKL5	79
CDKN1A	11
CDKN1B	6
CDKN2A	28
CDON	29
CDR1	12
CDRT1	21
CDS1	9
CDX4	5
CDYL	10
CDYL2	11
CEACAM1	14
CEACAM16	13
CEACAM18	10
CEACAM20	17
CEACAM5	24
CEACAM6	8
CEACAM7	13
CEACAM8	14
CEBPA	8
CEBPZ	21
CECR2	14
CEL	20
CELF1	4
CELF2	2
CELF3	9
CELF4	11
CELF5	2
CELF6	7
CELSR1	32
CELSR2	30
CELSR3	23
CENPB	6
CENPE	34
CENPF	103
CENPI	1
CENPJ	69
CEP104	26
CEP112	43
CEP120	37
CEP128	47
CEP135	50
CEP152	71
CEP164	68
CEP170	26
CEP192	65
CEP250	96
CEP290	151
CEP350	41
CEP57	23
CEP63	44
CEP68	15
CEP70	30
CEP72	29
CEP76	24
CEP78	30
CEP85	27
CEP85L	22
CEP89	49
CEP95	41
CEP97	30
CER1	7
CERCAM	19
CERK	15
CERKL	32
CES1	20
CES2	19
CES3	21
CES4A	28
CES5A	34
CETN1	5
CETP	20
CFB	15
CFH	26
CFHR1	21
CFHR2	21
CFHR3	22
CFHR4	39
CFHR5	42
CFI	28
CFP	12
CFTR	218
CGN	63
CGNL1	58
CHAD	11
CHAF1A	5
CHAF1B	7
CHAT	30
CHD1	11
CHD1L	37
CHD2	48
CHD3	22
CHD4	10
CHD5	20
CHD6	18
CHD7	129
CHD8	721
CHD9	25
CHDH	25
CHEK1	25
CHEK2	84
CHERP	9
CHFR	20
CHGB	24
CHI3L1	16
CHIA	26
CHIT1	16
CHL1	19
CHM	23
CHML	18
CHN1	8
CHN2	15
CHPF	25
CHPF2	41
CHRD	24
CHRDL1	7
CHRDL2	20
CHRM1	3
CHRM2	5
CHRM3	5
CHRM4	3
CHRM5	20
CHRNA1	17
CHRNA10	17
CHRNA2	18
CHRNA3	16
CHRNA4	20
CHRNA5	13
CHRNA6	16
CHRNA9	12
CHRNB1	14
CHRNB2	15
CHRNB3	17
CHRNB4	8
CHRND	18
CHRNG	30
CHST1	7
CHST10	11
CHST11	7
CHST12	10
CHST13	9
CHST15	19
CHST2	11
CHST3	12
CHST4	20
CHST5	11
CHST6	27
CHST7	5
CHST8	9
CHST9	17
CHSY1	15
CHSY3	19
CHTF18	70
CHUK	12
CIC	15
CIITA	36
CILP	51
CILP2	33
CIT	26
CIZ1	28
CKAP2	22
CKAP2L	26
CKAP4	8
CKAP5	6
CKM	5
CKMT2	24
CLASP1	16
CLASP2	17
CLASRP	18
CLCA1	27
CLCA2	47
CLCA4	23
CLCN1	51
CLCN2	31
CLCN3	8
CLCN5	16
CLCN6	18
CLCN7	22
CLCNKA	26
CLCNKB	33
CLDN17	9
CLEC14A	21
CLEC16A	22
CLEC1A	16
CLEC3A	14
CLEC4F	29
CLEC4M	25
CLGN	27
CLIC5	15
CLIC6	25
CLINT1	8
CLIP1	21
CLIP2	14
CLIP3	6
CLIP4	16
CLK1	12
CLK2	7
CLK3	17
CLMN	30
CLN3	24
CLNK	21
CLOCK	7
CLP1	12
CLPB	23
CLPTM1	11
CLPTM1L	14
CLPX	7
CLSPN	27
CLSTN1	9
CLSTN2	14
CLSTN3	14
CLTC	16
CLTCL1	68
CLU	7
CLUL1	18
CLVS1	5
CLVS2	5
CMIP	4
CMKLR1	6
CMYA5	137
CNBD1	31
CNDP1	18
CNDP2	12
CNGA1	34
CNGA2	19
CNGA3	27
CNGA4	20
CNGB1	47
CNGB3	43
CNKSR1	34
CNKSR2	10
CNKSR3	18
CNNM1	10
CNNM2	8
CNNM3	18
CNNM4	22
CNOT1	8
CNOT10	11
CNOT2	2
CNOT3	10
CNOT4	4
CNOT6	7
CNR1	5
CNST	24
CNTLN	92
CNTN1	19
CNTN2	23
CNTN3	25
CNTN4	23
CNTN5	21
CNTN6	58
CNTNAP1	48
CNTNAP2	33
CNTNAP3	39
CNTNAP3B	64
CNTNAP4	29
CNTNAP5	30
CNTRL	100
CNTROB	34
COASY	19
COBL	18
COBLL1	19
COCH	18
COG1	31
COG2	8
COG3	8
COG4	20
COG5	43
COG6	28
COG7	14
COG8	41
COIL	9
COL10A1	18
COL11A1	28
COL11A2	46
COL12A1	43
COL13A1	15
COL14A1	40
COL15A1	15
COL16A1	43
COL17A1	41
COL18A1	40
COL19A1	26
COL1A1	50
COL1A2	9
COL20A1	71
COL21A1	45
COL22A1	43
COL23A1	15
COL24A1	59
COL25A1	13
COL27A1	26
COL28A1	37
COL2A1	33
COL3A1	31
COL4A1	6
COL4A2	53
COL4A3	37
COL4A4	42
COL4A5	66
COL4A6	17
COL5A1	34
COL5A2	1
COL5A3	39
COL6A1	18
COL6A2	40
COL6A3	61
COL6A5	90
COL6A6	68
COL7A1	86
COL8A1	11
COL8A2	14
COL9A1	34
COL9A2	17
COL9A3	20
COLEC10	5
COLEC11	6
COLEC12	10
COLQ	20
COMP	28
COPA	2
COPB1	4
COPB2	9
COPS2	1
CORIN	53
CORO1A	6
CORO1B	14
CORO1C	5
CORO2A	18
CORO2B	6
CORO6	21
CORO7	47
COX10	10
CP	30
CPA1	17
CPA2	16
CPA3	21
CPA4	23
CPA5	19
CPA6	26
CPAMD8	55
CPB1	22
CPB2	15
CPD	16
CPE	6
CPEB2	29
CPEB3	11
CPEB4	5
CPED1	41
CPN1	15
CPN2	16
CPNE1	16
CPNE2	12
CPNE3	28
CPNE4	7
CPNE5	20
CPNE6	17
CPNE7	34
CPNE8	8
CPNE9	11
CPS1	36
CPSF2	18
CPSF3	13
CPT1A	32
CPT1B	30
CPT1C	24
CPVL	16
CPXCR1	11
CPXM1	21
CPXM2	30
CPZ	51
CR1	46
CR1L	31
CR2	36
CRAT	19
CRB1	56
CRB2	39
CREB3L1	8
CREB3L2	9
CREB3L3	23
CREB5	15
CREBBP	70
CRHBP	3
CRHR1	16
CRHR2	26
CRIM1	14
CRISP1	15
CRISP2	16
CRISP3	10
CRISPLD1	17
CRISPLD2	18
CRLF2	23
CRMP1	5
CRNKL1	29
CRNN	30
CROCC	90
CROT	32
CRP	11
CRTAC1	13
CRTAM	13
CRTC1	5
CRTC2	15
CRTC3	13
CRX	7
CRY1	22
CRY2	12
CRYBB1	10
CRYBG3	49
CT47B1	17
CTAGE1	18
CTBP1	6
CTBP2	38
CTC1	39
CTCF	6
CTCFL	25
CTDP1	43
CTIF	9
CTNNA1	18
CTNNA2	28
CTNNA3	22
CTNNAL1	23
CTNNB1	25
CTNNBL1	9
CTNND1	7
CTNND2	12
CTPS2	4
CTR9	15
CTSA	18
CTSC	19
CTSD	7
CTSE	20
CTSG	9
CTTN	22
CTTNBP2	30
CTTNBP2NL	10
CTU2	53
CUBN	106
CUL1	6
CUL2	5
CUL3	6
CUL4A	2
CUL4B	7
CUL5	10
CUL7	58
CUL9	38
CUX1	23
CUX2	14
CUZD1	21
CWC22	21
CWF19L2	29
CWH43	30
CX3CR1	6
CXCR1	13
CXCR2	8
CXCR4	10
CXorf66	9
CXXC1	9
CYB5R4	13
CYBB	21
CYFIP2	20
CYLC1	3
CYLC2	15
CYLD	12
CYP11A1	14
CYP11B1	20
CYP11B2	20
CYP17A1	13
CYP19A1	15
CYP1A1	19
CYP1A2	18
CYP1B1	24
CYP24A1	33
CYP26A1	20
CYP26B1	4
CYP26C1	17
CYP27A1	37
CYP27C1	10
CYP2A13	19
CYP2A6	15
CYP2A7	18
CYP2B6	15
CYP2C18	17
CYP2C19	23
CYP2C8	27
CYP2C9	14
CYP2D6	34
CYP2E1	13
CYP2F1	19
CYP2S1	11
CYP2W1	18
CYP39A1	23
CYP3A4	13
CYP3A43	16
CYP3A5	28
CYP3A7	16
CYP46A1	6
CYP4A11	21
CYP4A22	25
CYP4B1	19
CYP4F11	19
CYP4F12	30
CYP4F2	25
CYP4F22	14
CYP4F3	20
CYP4F8	20
CYP4V2	25
CYP4X1	20
CYP4Z1	18
CYP7A1	16
CYP7B1	26
CYP8B1	16
CYSLTR1	5
CYSLTR2	10
CYTH3	17
CYTH4	8
CYTIP	9
CSAD	22
CCSER2	19
CSDE1	3
CSE1L	4
CSF1	4
CSF1R	22
CSF2RA	18
CSF2RB	20
CSF3R	22
CSGALNACT1	25
CSGALNACT2	14
CSK	3
CSMD1	61
CSMD2	56
CSMD3	64
CSNK1A1L	14
CSNK1G2	6
CSNK2A1	7
CSPG4	49
CSPG5	3
CSPP1	58
CSRNP1	6
CSRNP2	4
CSRNP3	12
CSTF1	2
CSTF2	4
CSTF3	11
D2HGDH	27
DAAM1	16
DAAM2	19
DAB1	3
DAB2	5
DAB2IP	12
DACH2	5
DACT1	7
DACT2	37
DAG1	15
DAGLA	8
DAGLB	22
DAO	16
DAPK1	20
DAPK3	12
DARS2	19
DAXX	9
DAZAP1	4
DBF4	11
DBF4B	38
DBH	22
DBN1	3
DBX2	16
DCAF12	9
DCAF12L2	7
DCAF13	15
DCAF15	5
DCAF4	16
DCAF4L1	5
DCAF4L2	16
DCAF5	6
DCAF6	20
DCAF8L1	9
DCAF8L2	10
DCBLD1	24
DCBLD2	12
DCC	25
DCDC1	68
DCDC2	19
DCHS1	38
DCHS2	103
DCLK1	8
DCLK2	7
DCLK3	12
DCLRE1A	27
DCLRE1B	12
DCLRE1C	29
DCN	5
DCP1B	21
DCT	28
DCTN1	20
DCX	20
DCST1	32
DCST2	29
DDB1	6
DDC	15
DDHD1	18
DDHD2	32
DDN	15
DDO	25
DDR1	18
DDR2	19
DDX1	4
DDX10	30
DDX11	46
DDX17	2
DDX18	9
DDX20	23
DDX21	9
DDX23	14
DDX24	16
DDX27	10
DDX31	29
DDX39A	3
DDX3X	27
DDX4	9
DDX41	18
DDX42	2
DDX43	32
DDX46	9
DDX5	1
DDX50	25
DDX51	29
DDX53	6
DDX54	24
DDX55	17
DDX56	14
DDX58	35
DDX59	18
DDX60	54
DDX60L	62
DEAF1	31
DEF6	13
DEF8	22
DENND1A	18
DENND1C	21
DENND2A	21
DENND2C	28
DENND2D	16
DENND3	44
DENND4A	24
DENND4B	39
DENND4C	34
DENND5A	317
DENND5B	25
DEPDC1	25
DEPDC1B	20
DEPDC5	64
DEPTOR	14
DES	19
DET1	4
DGCR2	10
DGCR8	7
DGKA	12
DGKB	15
DGKD	31
DGKE	33
DGKG	28
DGKH	24
DGKI	21
DGKK	10
DGKQ	30
DGKZ	35
DHCR7	44
DHDH	20
DHRS2	7
DHRS7C	14
DHTKD1	41
DHX15	4
DHX16	47
DHX29	25
DHX30	6
DHX32	20
DHX33	22
DHX34	41
DHX35	35
DHX36	15
DHX37	20
DHX38	29
DHX40	12
DHX57	38
DHX58	20
DHX8	29
DHX9	8
DIAPH1	18
DIAPH2	15
DIAPH3	38
DICER1	85
DIDO1	17
DIO3	3
DIP2A	32
DIP2B	21
DIP2C	39
DIRAS3	3
DIS3	42
DIS3L	42
DIS3L2	18
DISC1	42
DISP1	35
DISP2	22
DIXDC1	28
DKK2	3
DLAT	23
DLC1	39
DLEC1	71
DLG1	13
DLG2	24
DLG3	12
DLG4	26
DLG5	13
DLGAP1	13
DLGAP2	8
DLGAP3	9
DLGAP4	4
DLGAP5	33
DLK1	7
DLL1	7
DLL3	22
DLL4	10
DLX5	6
DMBT1	88
DMBX1	4
DMD	394
DMGDH	40
DMKN	24
DMP1	13
DMPK	28
DMRT1	13
DMRT2	11
DMRT3	15
DMRTA1	13
DMRTB1	3
DMRTC2	14
DMTF1	8
DMWD	3
DMXL1	36
DMXL2	38
DNA2	30
DNAAF1	37
DNAAF3	19
DNAH1	120
DNAH10	133
DNAH11	187
[truncated: 7,117 more rows]

## Sheet: number cutoff none
Gene name	Number of germline mutations g	fMg	fSg	fNg	rSMg	rNMg	rNSg	rSMNg	rMSNg	rNSMg
JUN	418	0.586124	0.401914	0.0119617	0.685714	0.0204082	0.0297619	0.672	1.41618	0.0121065
A1BG	15	0	0	1				0	0
A1CF	684	0.650585	0.312865	0.0365497	0.480899	0.0561798	0.116822	0.455319	1.86192	0.0379363
A2M	3045	0.684401	0.303777	0.0118227	0.443858	0.0172745	0.0389189	0.436321	2.16857	0.0119641
A2ML1	1744	0.669151	0.300459	0.0303899	0.449015	0.0454156	0.101145	0.429508	2.02253	0.0313424
A4GALT	566	0.620141	0.355124	0.024735	0.57265	0.039886	0.0696517	0.550685	1.63256	0.0253623
AAAS	870	0.663218	0.310345	0.0264368	0.467938	0.0398614	0.0851852	0.45	1.96928	0.0271547
AACS	877	0.684151	0.293044	0.022805	0.428333	0.0333333	0.077821	0.414516	2.16606	0.0233372
AADAC	436	0.690367	0.279817	0.0298165	0.405316	0.0431894	0.106557	0.388535	2.22963	0.0307329
AADACL2	462	0.677489	0.268398	0.0541126	0.396166	0.0798722	0.201613	0.366864	2.10067	0.0572082
AADACL3	519	0.691715	0.289017	0.0192678	0.417827	0.0278552	0.0666667	0.406504	2.24375	0.0196464
AADACL4	518	0.741313	0.239382	0.019305	0.322917	0.0260417	0.0806452	0.314721	2.86567	0.019685
AAK1	1165	0.649785	0.337339	0.0128755	0.519155	0.0198151	0.0381679	0.509067	1.85539	0.0130435
AARS2	1287	0.684538	0.282828	0.032634	0.413167	0.0476731	0.115385	0.394366	2.16995	0.0337349
AARSD1	20	0.65	0.35	0	0.538462	0	0	0.538462	1.85714	0
AASDH	1251	0.701839	0.263789	0.0343725	0.375854	0.0489749	0.130303	0.358306	2.35389	0.035596
AASS	949	0.694415	0.277134	0.028451	0.39909	0.0409712	0.102662	0.383382	2.27241	0.0292842
AATK	2266	0.627979	0.359223	0.0127979	0.572031	0.0203795	0.0356265	0.560606	1.68802	0.0129638
ABAT	657	0.642314	0.339422	0.0182648	0.528436	0.028436	0.0538117	0.513825	1.79574	0.0186047
ABCA1	2461	0.655425	0.325884	0.0186916	0.49721	0.0285183	0.0573566	0.483424	1.90212	0.0190476
ABCA10	1618	0.698393	0.261434	0.0401731	0.374336	0.0575221	0.153664	0.353975	2.31557	0.0418545
ABCA12	2646	0.677249	0.301587	0.021164	0.445312	0.03125	0.0701754	0.431818	2.09836	0.0216216
ABCA13	6043	0.701969	0.263776	0.0342545	0.375766	0.0487977	0.129862	0.358283	2.35536	0.0354695
ABCA2	3424	0.588493	0.403037	0.00846963	0.684864	0.0143921	0.0210145	0.675147	1.43009	0.00854197
ABCA3	2315	0.644492	0.339093	0.0164147	0.526139	0.0254692	0.0484076	0.513072	1.81288	0.0166886
ABCA4	3077	0.683133	0.277868	0.038999	0.406755	0.0570885	0.140351	0.384788	2.1559	0.0405817
ABCA5	1673	0.71309	0.255828	0.0310819	0.358759	0.0435876	0.121495	0.343775	2.48542	0.032079
ABCA6	1761	0.723453	0.245315	0.0312323	0.339089	0.0431711	0.127315	0.325056	2.61602	0.0322392
ABCA7	3971	0.652984	0.320322	0.0266935	0.490551	0.0408793	0.0833333	0.471286	1.88171	0.0274256
ABCA8	1837	0.701688	0.261296	0.0370169	0.372382	0.0527541	0.141667	0.353721	2.35219	0.0384398
ABCA9	1718	0.678696	0.278231	0.0430733	0.409949	0.0634648	0.154812	0.385484	2.11232	0.0450122
ABCB1	1615	0.679257	0.299071	0.0216718	0.440292	0.0319052	0.0724638	0.426678	2.11776	0.0221519
ABCB10	837	0.634409	0.339307	0.0262843	0.53484	0.0414313	0.0774648	0.513562	1.73529	0.0269939
ABCB11	1664	0.67488	0.297476	0.0276442	0.440784	0.0409617	0.0929293	0.423439	2.07579	0.0284302
ABCB4	1455	0.664605	0.307904	0.0274914	0.463289	0.041365	0.0892857	0.444886	1.98156	0.0282686
ABCB5	1745	0.70086	0.259026	0.0401146	0.369583	0.0572363	0.154867	0.349575	2.34291	0.041791
ABCB6	1489	0.651444	0.321692	0.0268637	0.493814	0.0412371	0.0835073	0.474257	1.86898	0.0276052
ABCB7	478	0.610879	0.384937	0.0041841	0.630137	0.00684932	0.0108696	0.62585	1.56989	0.00420168
ABCB8	968	0.674587	0.302686	0.0227273	0.448698	0.0336907	0.0750853	0.434074	2.07302	0.0232558
ABCB9	1285	0.656031	0.325292	0.018677	0.495848	0.0284698	0.0574163	0.482122	1.90724	0.0190325
ABCC1	1954	0.61259	0.375128	0.0122825	0.612364	0.0200501	0.0327422	0.600328	1.58124	0.0124352
ABCC10	2755	0.657713	0.317241	0.0250454	0.48234	0.0380795	0.0789474	0.464646	1.92153	0.0256888
ABCC11	1822	0.693194	0.282108	0.0246981	0.406968	0.0356295	0.0875486	0.392966	2.25939	0.0253236
ABCC12	1655	0.67855	0.285196	0.0362538	0.420303	0.0534283	0.127119	0.398986	2.1109	0.0376176
ABCC2	1885	0.697613	0.269496	0.0328912	0.386312	0.0471483	0.122047	0.368918	2.30702	0.0340099
ABCC3	1973	0.689306	0.290928	0.0197669	0.422059	0.0286765	0.0679443	0.410293	2.2186	0.0201655
ABCC4	1517	0.647989	0.334871	0.0171391	0.516785	0.0264496	0.0511811	0.503469	1.84082	0.017438
ABCC5	1407	0.61194	0.366738	0.021322	0.599303	0.0348432	0.0581395	0.579125	1.57692	0.0217865
ABCC6	2271	0.6583	0.304271	0.0374284	0.462207	0.0568562	0.12301	0.437342	1.92655	0.0388838
ABCC8	2087	0.63057	0.34643	0.0229995	0.549392	0.0364742	0.06639	0.530059	1.70687	0.023541
ABCC9	1364	0.606305	0.372434	0.021261	0.614268	0.0350665	0.0570866	0.593458	1.54004	0.0217228
ABCD1	1185	0.644726	0.331646	0.0236287	0.514398	0.0366492	0.0712468	0.496212	1.81473	0.0242005
ABCD2	680	0.636765	0.335294	0.0279412	0.526559	0.0438799	0.0833333	0.504425	1.75304	0.0287443
ABCD3	588	0.666667	0.312925	0.0204082	0.469388	0.0306122	0.0652174	0.455446	2	0.0208333
ABCD4	959	0.630865	0.338895	0.0302398	0.53719	0.0479339	0.0892308	0.512618	1.70904	0.0311828
ABCE1	359	0.571031	0.406685	0.0222841	0.712195	0.0390244	0.0547945	0.685446	1.33117	0.022792
ABCF1	808	0.64604	0.320545	0.0334158	0.496169	0.0517241	0.104247	0.471767	1.82517	0.0345711
ABCF2	592	0.572635	0.403716	0.0236486	0.705015	0.0412979	0.0585774	0.677054	1.33992	0.0242215
ABCF3	861	0.656214	0.325203	0.018583	0.495575	0.0283186	0.0571429	0.481928	1.90878	0.0189349
ABCG1	1036	0.626448	0.352317	0.0212355	0.562404	0.0338983	0.060274	0.543964	1.677	0.0216963
ABCG2	860	0.703488	0.261628	0.0348837	0.371901	0.0495868	0.133333	0.354331	2.37255	0.0361446
ABCG4	683	0.604685	0.374817	0.0204978	0.619855	0.0338983	0.0546875	0.599532	1.52963	0.0209268
ABCG5	1777	0.684299	0.297693	0.0180079	0.435033	0.0263158	0.0604915	0.423878	2.16756	0.0183381
ABCG8	1197	0.700919	0.269006	0.0300752	0.38379	0.0429082	0.111801	0.368	2.34358	0.0310078
ABHD16A	578	0.617647	0.365052	0.017301	0.591036	0.0280112	0.0473934	0.574932	1.61538	0.0176056
ABHD2	411	0.562044	0.418491	0.0194647	0.744589	0.034632	0.0465116	0.719665	1.28333	0.0198511
ABHD8	842	0.587886	0.408551	0.00356295	0.694949	0.00606061	0.00872093	0.690763	1.42651	0.00357569
ABI3	544	0.681985	0.297794	0.0202206	0.436658	0.0296496	0.0679012	0.424084	2.14451	0.0206379
ABI3BP	1924	0.698545	0.276507	0.024948	0.395833	0.0357143	0.0902256	0.382184	2.31724	0.0255864
ABL1	1321	0.620742	0.374716	0.00454201	0.603659	0.00731707	0.0121212	0.599274	1.63673	0.00456274
ABL2	1351	0.656551	0.326425	0.0170244	0.497182	0.0259301	0.0521542	0.484615	1.91164	0.0173193
ABLIM1	995	0.689447	0.297487	0.0130653	0.431487	0.0189504	0.0439189	0.423462	2.22006	0.0132383
ABLIM2	1036	0.638996	0.344595	0.0164093	0.539275	0.0256798	0.047619	0.525773	1.77005	0.016683
ABLIM3	887	0.712514	0.270575	0.0169109	0.379747	0.0237342	0.0625	0.370943	2.47843	0.0172018
ABR	1390	0.598561	0.38705	0.0143885	0.646635	0.0240385	0.0371747	0.631455	1.49104	0.0145985
ABRA	487	0.681725	0.287474	0.0308008	0.421687	0.0451807	0.107143	0.403458	2.14194	0.0317797
ABTB1	719	0.645341	0.329624	0.0250348	0.510776	0.0387931	0.0759494	0.491701	1.81961	0.0256776
ABTB2	1276	0.659875	0.321317	0.0188088	0.486936	0.0285036	0.0585366	0.473441	1.94009	0.0191693
ACACB	3028	0.659841	0.318032	0.0221268	0.481982	0.0335335	0.0695742	0.466344	1.93981	0.0226275
ACAD10	1314	0.678082	0.284627	0.0372907	0.419753	0.0549944	0.131016	0.397872	2.10638	0.0387352
ACAD11	1413	0.681529	0.284501	0.0339703	0.417445	0.0498442	0.119403	0.397626	2.14	0.0351648
ACAD9	986	0.690669	0.291075	0.0182556	0.421439	0.0264317	0.0627178	0.410587	2.23279	0.018595
ACADS	674	0.672107	0.302671	0.0252226	0.450331	0.0375276	0.0833333	0.434043	2.04977	0.0258752
ACAN	3055	0.687725	0.301146	0.0111293	0.437887	0.0161828	0.0369565	0.430913	2.20231	0.0112546
ACAP1	1527	0.663392	0.317616	0.0189915	0.478776	0.0286278	0.0597938	0.465451	1.97082	0.0193591
ACAP2	633	0.652449	0.327014	0.0205371	0.501211	0.031477	0.0628019	0.485915	1.87727	0.0209677
ACAP3	2132	0.626642	0.358818	0.0145403	0.572605	0.0232036	0.0405229	0.55962	1.67839	0.0147549
ACBD3	546	0.653846	0.32967	0.0164835	0.504202	0.0252101	0.05	0.491803	1.88889	0.0167598
ACBD5	703	0.671408	0.3101	0.0184922	0.461864	0.0275424	0.059633	0.449485	2.04329	0.0188406
ACCS	759	0.673254	0.29776	0.0289855	0.44227	0.0430528	0.0973451	0.424015	2.06048	0.0298507
ACCSL	652	0.665644	0.296012	0.0383436	0.4447	0.0576037	0.129534	0.420479	1.99083	0.0398724
ACD	2401	0.67097	0.315285	0.0137443	0.469894	0.0204842	0.0435931	0.460462	2.03924	0.0139358
ACE	2153	0.637715	0.330701	0.0315838	0.518572	0.0495266	0.0955056	0.494101	1.76026	0.0326139
ACE2	473	0.704017	0.281184	0.0147992	0.399399	0.021021	0.0526316	0.391176	2.37857	0.0150215
ACHE	1060	0.600943	0.388679	0.0103774	0.646782	0.0172684	0.026699	0.635802	1.50591	0.0104862
ACIN1	1822	0.662459	0.327662	0.00987925	0.494615	0.014913	0.0301508	0.487347	1.9626	0.00997783
ACKR3	475	0.56	0.433684	0.00631579	0.774436	0.0112782	0.0145631	0.765799	1.27273	0.00635593
ACLY	1133	0.633716	0.346867	0.0194175	0.547354	0.0306407	0.0559796	0.531081	1.73012	0.019802
ACMSD	417	0.673861	0.294964	0.0311751	0.437722	0.0462633	0.105691	0.418367	2.06618	0.0321782
ACO1	962	0.689189	0.284823	0.0259875	0.413273	0.0377074	0.0912409	0.398256	2.21739	0.0266809
ACO2	1222	0.531097	0.459083	0.00981997	0.864407	0.01849	0.0213904	0.848714	1.13264	0.00991736
ACOT11	804	0.690299	0.272388	0.0373134	0.394595	0.0540541	0.136986	0.374359	2.22892	0.0387597
ACOT12	1011	0.70821	0.272997	0.0187933	0.385475	0.0265363	0.0688406	0.37551	2.42712	0.0191532
ACOX1	732	0.624317	0.349727	0.0259563	0.560175	0.0415755	0.0742188	0.537815	1.66182	0.026648
ACOX2	810	0.664198	0.303704	0.0320988	0.457249	0.0483271	0.105691	0.43617	1.97794	0.0331633
ACOX3	1577	0.680406	0.296132	0.0234623	0.435228	0.0344828	0.0792291	0.420721	2.12897	0.024026
ACOXL	917	0.672846	0.294438	0.0327154	0.437601	0.0486224	0.111111	0.417311	2.05667	0.0338219
ACRBP	612	0.665033	0.295752	0.0392157	0.444717	0.0589681	0.132597	0.419954	1.98537	0.0408163
ACSBG1	1029	0.626822	0.350826	0.0223518	0.55969	0.0356589	0.0637119	0.540419	1.67969	0.0228628
ACSBG2	788	0.696701	0.279188	0.0241117	0.400729	0.0346084	0.0863636	0.387324	2.29707	0.0247074
ACSF2	627	0.649123	0.328549	0.0223285	0.506143	0.034398	0.0679612	0.489311	1.85	0.0228385
ACSF3	1998	0.673173	0.298298	0.0285285	0.443123	0.0423792	0.0956376	0.425107	2.05972	0.0293663
ACSL1	754	0.635279	0.338196	0.0265252	0.532359	0.0417537	0.0784314	0.511022	1.74182	0.027248
ACSL3	634	0.638801	0.347003	0.0141956	0.54321	0.0222222	0.0409091	0.531401	1.76856	0.0144
ACSL4	379	0.638522	0.350923	0.0105541	0.549587	0.0165289	0.0300752	0.54065	1.76642	0.0106667
ACSL5	938	0.687633	0.296375	0.0159915	0.431008	0.0232558	0.0539568	0.421212	2.20137	0.0162514
ACSL6	772	0.642487	0.338083	0.0194301	0.52621	0.0302419	0.0574713	0.510763	1.7971	0.0198151
ACSM1	741	0.670715	0.280702	0.048583	0.418511	0.0724346	0.173077	0.390244	2.03689	0.0510638
ACSM2A	911	0.699232	0.256861	0.0439078	0.367347	0.0627943	0.17094	0.345643	2.32482	0.0459242
ACSM2B	946	0.682875	0.272727	0.0443975	0.399381	0.0650155	0.162791	0.375	2.15333	0.0464602
ACSM3	1955	0.729923	0.246547	0.0235294	0.337772	0.0322355	0.0954357	0.327223	2.70265	0.0240964
ACSM4	585	0.528205	0.434188	0.0376068	0.822006	0.0711974	0.0866142	0.767372	1.11957	0.0390764
ACSM5	846	0.672577	0.299054	0.0283688	0.44464	0.0421793	0.0948617	0.426644	2.05415	0.0291971
ACSS1	888	0.603604	0.368243	0.0281532	0.610075	0.0466418	0.0764526	0.582888	1.52273	0.0289687
ACSS2	750	0.709333	0.264	0.0266667	0.37218	0.037594	0.10101	0.358696	2.44037	0.0273973
ACSS3	844	0.695498	0.281991	0.0225118	0.405451	0.032368	0.0798319	0.392739	2.28405	0.0230303
ACTA1	483	0.426501	0.544513	0.0289855	1.2767	0.0679612	0.0532319	1.19545	0.743682	0.0298507
ACTB	438	0.317352	0.678082	0.00456621	2.13669	0.0143885	0.00673401	2.10638	0.464883	0.00458716
ACTBL2	506	0.703557	0.250988	0.0454545	0.356742	0.0646067	0.181102	0.335092	2.37333	0.047619
ACTC1	420	0.45	0.540476	0.00952381	1.20106	0.021164	0.0176211	1.17617	0.818182	0.00961538
ACTG1	1267	0.359116	0.625099	0.0157853	1.74066	0.043956	0.0252525	1.66737	0.560345	0.0160385
ACTG2	320	0.5125	0.471875	0.015625	0.920732	0.0304878	0.0331126	0.893491	1.05128	0.015873
ACTL6B	362	0.494475	0.466851	0.038674	0.944134	0.0782123	0.0828402	0.875648	0.978142	0.0402299
ACTL7A	582	0.676976	0.295533	0.0274914	0.436548	0.0406091	0.0930233	0.419512	2.09574	0.0282686
ACTL7B	643	0.642302	0.33437	0.0233281	0.520581	0.0363196	0.0697674	0.502336	1.79565	0.0238854
ACTL8	470	0.608511	0.380851	0.0106383	0.625874	0.0174825	0.027933	0.61512	1.55435	0.0107527
ACTL9	639	0.687011	0.289515	0.0234742	0.421412	0.0341686	0.0810811	0.407489	2.195	0.0240385
ACTN1	1212	0.64604	0.342409	0.0115512	0.530013	0.0178799	0.0337349	0.520703	1.82517	0.0116861
ACTN2	1195	0.639331	0.343096	0.0175732	0.536649	0.0274869	0.0512195	0.522293	1.77262	0.0178876
ACTN4	1177	0.57859	0.414613	0.00679694	0.716593	0.0117474	0.0163934	0.708273	1.37298	0.00684346
ACTR1B	712	0.713483	0.272472	0.0140449	0.38189	0.019685	0.0515464	0.374517	2.4902	0.014245
ACTR5	771	0.669261	0.30869	0.0220493	0.46124	0.0329457	0.0714286	0.446529	2.02353	0.0225464
ACTR8	1351	0.680237	0.285714	0.0340489	0.420022	0.0500544	0.119171	0.4	2.12731	0.035249
ACTRT1	349	0.727794	0.255014	0.017192	0.350394	0.023622	0.0674157	0.342308	2.67368	0.0174927
ACTRT2	573	0.633508	0.34555	0.0209424	0.545455	0.0330579	0.0606061	0.528	1.72857	0.0213904
ACVR1	479	0.60334	0.36952	0.0271399	0.612457	0.0449827	0.0734463	0.586093	1.52105	0.027897
ACVR1B	450	0.56	0.428889	0.0111111	0.765873	0.0198413	0.0259067	0.750973	1.27273	0.011236
ACVR1C	470	0.629787	0.340426	0.0297872	0.540541	0.0472973	0.0875	0.516129	1.70115	0.0307018
ACVR2A	348	0.58908	0.408046	0.00287356	0.692683	0.00487805	0.00704225	0.68932	1.43357	0.00288184
ACVR2B	603	0.606965	0.383085	0.00995025	0.631148	0.0163934	0.025974	0.620968	1.5443	0.0100503
ACVRL1	704	0.634943	0.325284	0.0397727	0.512304	0.0626398	0.122271	0.482105	1.7393	0.0414201
ADAD1	563	0.698046	0.280639	0.0213144	0.402036	0.0305344	0.0759494	0.390123	2.31176	0.0217786
ADAD2	1342	0.634873	0.339046	0.0260805	0.534038	0.0410798	0.0769231	0.512965	1.73878	0.0267789
ADAM10	577	0.629116	0.362218	0.00866551	0.575758	0.0137741	0.0239234	0.567935	1.69626	0.00874126
ADAM11	833	0.609844	0.367347	0.0228091	0.602362	0.0374016	0.0620915	0.580645	1.56308	0.0233415
ADAM12	1053	0.663818	0.322887	0.0132953	0.486409	0.0200286	0.0411765	0.476858	1.97458	0.0134745
ADAM15	1269	0.659574	0.308905	0.0315209	0.468339	0.0477897	0.102041	0.446978	1.9375	0.0325468
ADAM17	1201	0.65612	0.331391	0.0124896	0.505076	0.0190355	0.0376884	0.495641	1.90799	0.0126476
ADAM18	897	0.693423	0.263099	0.0434783	0.379421	0.062701	0.165254	0.357035	2.26182	0.0454545
ADAM19	1011	0.668645	0.310584	0.0207715	0.464497	0.0310651	0.066879	0.450502	2.01791	0.0212121
ADAM2	883	0.718007	0.246886	0.0351076	0.343849	0.0488959	0.142202	0.32782	2.54618	0.036385
ADAM20	861	0.720093	0.248548	0.0313589	0.345161	0.0435484	0.126168	0.330757	2.57261	0.0323741
ADAM21	861	0.653891	0.313589	0.0325203	0.479574	0.0497336	0.103704	0.456853	1.88926	0.0336134
ADAM22	1129	0.666962	0.310009	0.0230292	0.464807	0.0345286	0.0742857	0.449294	2.00266	0.0235721
ADAM23	842	0.686461	0.300475	0.0130641	0.437716	0.0190311	0.0434783	0.429542	2.18939	0.0132371
ADAM28	1078	0.710575	0.258813	0.0306122	0.36423	0.0430809	0.11828	0.349186	2.45513	0.0315789
ADAM29	1046	0.707457	0.264818	0.0277247	0.374324	0.0391892	0.104693	0.360208	2.4183	0.0285152
ADAM30	929	0.689989	0.286329	0.0236814	0.414977	0.0343214	0.0827068	0.401207	2.22569	0.0242558
ADAM32	930	0.707527	0.256989	0.0354839	0.363222	0.050152	0.138075	0.345876	2.41912	0.0367893
ADAM33	1506	0.64077	0.325365	0.0338645	0.507772	0.0528497	0.104082	0.482283	1.78373	0.0350515
ADAM7	918	0.717865	0.252723	0.0294118	0.352049	0.0409712	0.116379	0.338192	2.5444	0.030303
ADAM9	1239	0.678773	0.305892	0.0153349	0.450654	0.0225922	0.0501319	0.440698	2.11307	0.0155738
ADAMDEC1	561	0.691622	0.272727	0.0356506	0.39433	0.0515464	0.130719	0.375	2.24277	0.0369686
ADAMTS1	1232	0.681006	0.30763	0.0113636	0.451728	0.0166865	0.0369393	0.444314	2.13486	0.0114943
ADAMTS10	1397	0.600573	0.384395	0.0150322	0.640048	0.0250298	0.0391061	0.624419	1.50358	0.0152616
ADAMTS12	1955	0.685934	0.282353	0.0317136	0.411633	0.0462342	0.112319	0.393443	2.18404	0.0327522
ADAMTS13	2715	0.686188	0.288766	0.025046	0.420827	0.0365003	0.0867347	0.406007	2.18662	0.0256895
ADAMTS14	1712	0.671729	0.303154	0.0251168	0.451304	0.0373913	0.0828516	0.435038	2.04626	0.0257639
ADAMTS15	1298	0.658706	0.325886	0.0154083	0.494737	0.0233918	0.0472813	0.483429	1.93002	0.0156495
ADAMTS16	1570	0.67707	0.303822	0.0191083	0.44873	0.028222	0.0628931	0.436414	2.09665	0.0194805
ADAMTS17	2030	0.635961	0.340394	0.0236453	0.535244	0.0371805	0.0694645	0.516057	1.74696	0.024218
ADAMTS18	2127	0.672308	0.298543	0.029149	0.444056	0.0433566	0.0976378	0.425603	2.05165	0.0300242
ADAMTS19	1264	0.660601	0.307753	0.0316456	0.465868	0.0479042	0.102828	0.444571	1.94639	0.0326797
ADAMTS2	1569	0.643722	0.345443	0.0108349	0.536634	0.0168317	0.0313653	0.527751	1.8068	0.0109536
ADAMTS20	2186	0.725069	0.23925	0.0356816	0.329968	0.0492114	0.14914	0.314492	2.63727	0.0370019
ADAMTS3	1336	0.720808	0.257485	0.0217066	0.357217	0.0301142	0.0843023	0.346774	2.58177	0.0221882
ADAMTS4	1583	0.602021	0.377764	0.0202148	0.627492	0.0335782	0.0535117	0.607107	1.5127	0.0206319
ADAMTS5	1206	0.656716	0.322554	0.0207297	0.491162	0.0315657	0.0642674	0.476132	1.91304	0.0211685
ADAMTS6	997	0.650953	0.338014	0.0110331	0.51926	0.0169492	0.0326409	0.510606	1.86494	0.0111562
ADAMTS7	2586	0.637278	0.341454	0.0212684	0.535801	0.0333738	0.0622877	0.518497	1.75693	0.0217305
ADAMTS8	1263	0.653998	0.320665	0.0253365	0.490315	0.0387409	0.0790123	0.472028	1.89016	0.0259951
ADAMTS9	2324	0.668675	0.318847	0.0124785	0.476834	0.0186615	0.0391363	0.468099	2.01818	0.0126362
ADAMTSL1	2841	0.669835	0.312918	0.0172474	0.467157	0.0257488	0.0551181	0.45543	2.02878	0.0175501
ADAMTSL2	1205	0.604149	0.374274	0.0215768	0.619505	0.0357143	0.0576497	0.598143	1.52621	0.0220526
ADAMTSL3	2049	0.696925	0.27672	0.0263543	0.397059	0.0378151	0.0952381	0.382591	2.29952	0.0270677
ADAMTSL4	1629	0.669122	0.294045	0.0368324	0.43945	0.0550459	0.125261	0.416522	2.02226	0.0382409
ADAR	1382	0.627352	0.350217	0.0224313	0.558247	0.0357555	0.0640496	0.538976	1.6835	0.022946
ADARB1	756	0.616402	0.374339	0.00925926	0.607296	0.0150215	0.024735	0.598309	1.6069	0.00934579
ADARB2	1048	0.624046	0.371183	0.00477099	0.594801	0.00764526	0.0128535	0.590288	1.6599	0.00479386
ADAT1	699	0.702432	0.260372	0.037196	0.370672	0.0529532	0.142857	0.352031	2.36058	0.038633
ADCK1	776	0.68299	0.277062	0.0399485	0.40566	0.0584906	0.144186	0.383244	2.15447	0.0416107
ADCK2	786	0.680662	0.300254	0.019084	0.441121	0.0280374	0.0635593	0.429091	2.13147	0.0194553
ADCK5	1265	0.596047	0.389723	0.0142292	0.653846	0.0238727	0.0365112	0.638601	1.47554	0.0144346
ADCY1	1101	0.558583	0.432334	0.00908265	0.773984	0.0162602	0.0210084	0.7616	1.26543	0.0091659
ADCY10	1777	0.673044	0.29094	0.0360158	0.432274	0.0535117	0.123791	0.410317	2.05852	0.0373614
ADCY2	931	0.595059	0.401719	0.00322234	0.67509	0.00541516	0.00802139	0.671454	1.4695	0.00323276
ADCY3	1479	0.675456	0.308993	0.015551	0.457457	0.023023	0.0503282	0.447162	2.08125	0.0157967
ADCY4	1396	0.641834	0.328797	0.0293696	0.512277	0.0457589	0.0893246	0.489861	1.792	0.0302583
ADCY5	1782	0.554433	0.328844	0.116723	0.593117	0.210526	0.354949	0.489967	1.24433	0.132147
ADCY6	1371	0.657914	0.329686	0.0123997	0.501109	0.018847	0.0376106	0.491839	1.92324	0.0125554
ADCY7	1371	0.617797	0.369074	0.0131291	0.597403	0.0212515	0.0355731	0.584971	1.61641	0.0133038
ADCY8	1404	0.641026	0.345442	0.0135328	0.538889	0.0211111	0.0391753	0.527748	1.78571	0.0137184
ADCY9	1862	0.623523	0.368421	0.00805585	0.59087	0.0129199	0.0218659	0.583333	1.65621	0.00812128
ADCYAP1R1	539	0.625232	0.343228	0.0315399	0.548961	0.0504451	0.0918919	0.522599	1.66832	0.032567
ADD1	911	0.701427	0.289791	0.00878156	0.413146	0.0125196	0.030303	0.408037	2.34926	0.00885936
ADD2	893	0.62486	0.362822	0.012318	0.580645	0.0197133	0.0339506	0.56942	1.66567	0.0124717
ADD3	738	0.708672	0.284553	0.00677507	0.40153	0.00956023	0.0238095	0.397727	2.43256	0.00682128
ADGB	1709	0.717964	0.252194	0.029842	0.351263	0.0415648	0.118329	0.337246	2.54564	0.03076
ADH1A	422	0.701422	0.28673	0.0118483	0.408784	0.0168919	0.0413223	0.401993	2.34921	0.0119904
ADH1B	527	0.677419	0.303605	0.0189753	0.448179	0.0280112	0.0625	0.435967	2.1	0.0193424
ADH6	422	0.701422	0.270142	0.028436	0.385135	0.0405405	0.105263	0.37013	2.34921	0.0292683
ADH7	547	0.727605	0.254113	0.0182815	0.349246	0.0251256	0.0719424	0.340686	2.67114	0.018622
ADHFE1	579	0.708117	0.279793	0.0120898	0.395122	0.0170732	0.0432099	0.388489	2.42604	0.0122378
ADNP	426	0	0.957746	0.0422535			0.0441176	22.6667	0	0.0441176
ADNP2	460	0	0.978261	0.0217391			0.0222222	45	0	0.0222222
ADORA1	403	0.627792	0.362283	0.00992556	0.577075	0.0158103	0.0273973	0.568093	1.68667	0.0100251
ADORA2A	489	0.642127	0.349693	0.00817996	0.544586	0.0127389	0.0233918	0.537736	1.79429	0.00824742
ADORA3	757	0.663144	0.324967	0.011889	0.49004	0.0179283	0.0365854	0.481409	1.96863	0.0120321
ADRA1A	1055	0.669194	0.300474	0.0303318	0.449008	0.0453258	0.100946	0.429539	2.02292	0.0312805
ADRA1B	738	0.654472	0.329268	0.0162602	0.503106	0.0248447	0.0493827	0.490909	1.89412	0.0165289
ADRA1D	876	0.655251	0.319635	0.0251142	0.487805	0.0383275	0.0785714	0.469799	1.90066	0.0257611
ADRA2A	624	0.625	0.357372	0.0176282	0.571795	0.0282051	0.0493274	0.55611	1.66667	0.0179445
ADRB2	530	0.609434	0.358491	0.0320755	0.588235	0.0526316	0.0894737	0.558824	1.56039	0.0331384
ADSL	574	0.698606	0.266551	0.0348432	0.381546	0.0498753	0.130719	0.36342	2.31792	0.0361011
AEBP1	1629	0.67035	0.308778	0.0208717	0.460623	0.0311355	0.0675944	0.446714	2.03352	0.0213166
AFAP1	1698	0.657244	0.326855	0.0159011	0.497312	0.0241935	0.0486486	0.485564	1.91753	0.016158
AFAP1L1	931	0.664876	0.303974	0.0311493	0.457189	0.0468498	0.102473	0.436728	1.98397	0.0321508
AFAP1L2	1127	0.644188	0.332742	0.0230701	0.516529	0.0358127	0.0693333	0.49867	1.81047	0.0236149
AFF1	1488	0.686156	0.305108	0.00873656	0.444662	0.0127326	0.0286344	0.439072	2.1863	0.00881356
AFF2	970	0.684536	0.310309	0.00515464	0.453313	0.00753012	0.0166113	0.449925	2.16993	0.00518135
AFF3	1600	0.663125	0.33	0.006875	0.497644	0.0103676	0.0208333	0.492537	1.96846	0.00692259
AFF4	1023	0.679374	0.317693	0.00293255	0.467626	0.00431655	0.00923077	0.465616	2.1189	0.00294118
AFG3L2	903	0.644518	0.326689	0.0287929	0.506873	0.0446735	0.0881356	0.485197	1.81308	0.0296465
AFM	731	0.705882	0.253078	0.0410397	0.358527	0.0581395	0.162162	0.338828	2.4	0.042796
AFP	660	0.683333	0.287879	0.0287879	0.421286	0.0421286	0.1	0.404255	2.15789	0.0296412
AFTPH	884	0.727376	0.264706	0.00791855	0.363919	0.0108865	0.0299145	0.36	2.66805	0.00798176
AGAP1	1733	0.641085	0.348529	0.0103866	0.543654	0.0162016	0.0298013	0.534987	1.78617	0.0104956
AGAP2	1552	0.54317	0.32732	0.12951	0.60261	0.238434	0.395669	0.48659	1.189	0.148779
AGAP3	1420	0.604225	0.385915	0.00985915	0.638695	0.016317	0.0255474	0.62844	1.52669	0.00995733
AGAP5	785	0.68535	0.287898	0.0267516	0.420074	0.0390335	0.0929204	0.404293	2.17814	0.0274869
AGAP6	908	0.704846	0.26652	0.0286344	0.378125	0.040625	0.107438	0.363363	2.38806	0.0294785
AGBL1	1800	0.672778	0.292778	0.0344444	0.435178	0.0511974	0.117647	0.413983	2.05603	0.0356732
AGBL2	950	0.684211	0.273684	0.0421053	0.4	0.0615385	0.153846	0.376812	2.16667	0.043956
AGBL3	1192	0.690436	0.276846	0.0327181	0.400972	0.0473876	0.118182	0.382831	2.23035	0.0338248
AGBL4	713	0.691445	0.286115	0.0224404	0.413793	0.0324544	0.0784314	0.400786	2.24091	0.0229555
AGBL5	1138	0.669596	0.314587	0.0158172	0.469816	0.023622	0.0502793	0.458974	2.0266	0.0160714
AGFG2	552	0.655797	0.327899	0.0163043	0.5	0.0248619	0.0497238	0.487871	1.90526	0.0165746
AGGF1	799	0.689612	0.292866	0.0175219	0.424682	0.0254083	0.0598291	0.414159	2.22177	0.0178344
AGK	514	0.669261	0.291829	0.0389105	0.436047	0.0581395	0.133333	0.412088	2.02353	0.0404858
AGL	1779	0.708263	0.251827	0.0399101	0.355556	0.0563492	0.158482	0.336589	2.42775	0.0415691
AGMO	789	0.708492	0.258555	0.0329531	0.364937	0.0465116	0.127451	0.348718	2.43043	0.034076
AGPAT4	373	0.608579	0.372654	0.0187668	0.612335	0.030837	0.0503597	0.594017	1.55479	0.0191257
AGPS	533	0.585366	0.401501	0.0131332	0.685897	0.0224359	0.0327103	0.670846	1.41176	0.013308
AGRN	3476	0.624281	0.367952	0.00776755	0.589401	0.0124424	0.0211102	0.582157	1.66156	0.00782836
AGT	727	0.624484	0.349381	0.0261348	0.559471	0.0418502	0.0748031	0.536998	1.663	0.0268362
AGTPBP1	1247	0.672815	0.309543	0.0176423	0.460072	0.0262217	0.0569948	0.448316	2.05637	0.0179592
AGTR1	453	0.668874	0.306843	0.0242826	0.458746	0.0363036	0.0791367	0.442675	2.02	0.0248869
AGTR2	299	0.70903	0.267559	0.0234114	0.377358	0.0330189	0.0875	0.365297	2.43678	0.0239726
AGXT	682	0.671554	0.281525	0.0469208	0.419214	0.069869	0.166667	0.391837	2.04464	0.0492308
AGXT2	697	0.700143	0.262554	0.0373027	0.375	0.0532787	0.142077	0.356031	2.33493	0.0387481
AHCTF1	2376	0.720118	0.274832	0.00505051	0.381648	0.00701344	0.0183767	0.37899	2.57293	0.00507614
AHCY	721	0.628294	0.352288	0.0194175	0.560706	0.0309051	0.0551181	0.543897	1.6903	0.019802
AHCYL2	581	0.619621	0.364888	0.0154905	0.588889	0.025	0.0424528	0.574526	1.62896	0.0157343
AHDC1	2029	0.624446	0.364712	0.0108428	0.584057	0.0173639	0.0297297	0.574088	1.66273	0.0109616
AHI1	1451	0.707099	0.252929	0.0399724	0.3577	0.0565302	0.158038	0.338561	2.41412	0.0416368
AHNAK	7199	0.712321	0.283095	0.00458397	0.397426	0.00643526	0.0161923	0.394885	2.4761	0.00460508
AHNAK2	11661	0.666152	0.322957	0.010891	0.484809	0.0163491	0.0337228	0.477011	1.99538	0.0110109
AHR	872	0.680046	0.309633	0.0103211	0.455312	0.0151771	0.0333333	0.448505	2.12545	0.0104287
AHSG	497	0.706237	0.277666	0.0160966	0.393162	0.022792	0.057971	0.384401	2.40411	0.0163599
AICDA	270	0.611111	0.340741	0.0481481	0.557576	0.0787879	0.141304	0.516854	1.57143	0.0505837
AIFM1	867	0.649366	0.344867	0.00576701	0.531083	0.00888099	0.0167224	0.526408	1.85197	0.00580046
AIFM3	766	0.638381	0.335509	0.0261097	0.525562	0.0408998	0.077821	0.504912	1.76534	0.0268097
AIM2	344	0.686047	0.27907	0.0348837	0.40678	0.0508475	0.125	0.387097	2.18519	0.0361446
AIPL1	605	0.646281	0.323967	0.0297521	0.501279	0.0460358	0.0918367	0.479218	1.8271	0.0306644
AIRE	886	0.6614	0.310384	0.0282167	0.469283	0.0426621	0.0909091	0.450082	1.95333	0.029036
AJAP1	570	0.654386	0.342105	0.00350877	0.522788	0.00536193	0.0102564	0.52	1.8934	0.00352113
AK5	559	0.624329	0.36136	0.0143113	0.578797	0.0229226	0.039604	0.565826	1.6619	0.0145191
AK7	922	0.703905	0.261388	0.0347072	0.371341	0.0493066	0.13278	0.353891	2.37729	0.0359551
AK8	678	0.644543	0.325959	0.0294985	0.505721	0.0457666	0.0904977	0.483589	1.81328	0.0303951
AKAP1	988	0.67004	0.316802	0.0131579	0.47281	0.0196375	0.0415335	0.463704	2.03067	0.0133333
AKAP11	1931	0.707405	0.284827	0.007768	0.402635	0.010981	0.0272727	0.398262	2.4177	0.00782881
AKAP12	1971	0.694064	0.297311	0.00862506	0.428363	0.0124269	0.0290102	0.423105	2.26866	0.0087001
AKAP13	3583	0.706391	0.283561	0.0100474	0.401422	0.0142236	0.0354331	0.395793	2.40589	0.0101494
AKAP17A	1017	0.639135	0.351032	0.00983284	0.549231	0.0153846	0.0280112	0.540909	1.77112	0.00993049
AKAP3	958	0.710856	0.269311	0.019833	0.378855	0.0279001	0.0736434	0.368571	2.45848	0.0202343
AKAP4	593	0.696459	0.296796	0.00674536	0.42615	0.00968523	0.0227273	0.422062	2.29444	0.00679117
AKAP6	2516	0.722178	0.269475	0.00834658	0.373143	0.0115575	0.0309735	0.368879	2.59943	0.00841683
AKAP8	999	0.683684	0.308308	0.00800801	0.450952	0.011713	0.025974	0.445731	2.16139	0.00807265
AKAP8L	957	0.658307	0.329154	0.0125392	0.5	0.0190476	0.0380952	0.490654	1.92661	0.0126984
AKAP9	4014	0.713004	0.261584	0.0254111	0.366876	0.0356394	0.0971429	0.354251	2.48438	0.0260736
AKNA	1857	0.698977	0.290253	0.0107701	0.415254	0.0154083	0.0371058	0.408953	2.322	0.0108873
AKNAD1	917	0.721919	0.241003	0.0370774	0.333837	0.0513595	0.153846	0.317529	2.59608	0.0385051
AKR1D1	362	0.679558	0.290055	0.0303867	0.426829	0.0447154	0.104762	0.40856	2.12069	0.031339
AKT1	494	0.518219	0.475709	0.00607287	0.917969	0.0117188	0.012766	0.907336	1.07563	0.00610998
AKT2	485	0.579381	0.404124	0.0164948	0.697509	0.0284698	0.0408163	0.678201	1.37745	0.0167715
AKT3	308	0.532468	0.454545	0.012987	0.853659	0.0243902	0.0285714	0.833333	1.13889	0.0131579
ALAS1	716	0.657821	0.326816	0.0153631	0.496815	0.0233546	0.0470085	0.485477	1.92245	0.0156028
ALAS2	470	0.608511	0.387234	0.00425532	0.636364	0.00699301	0.010989	0.631944	1.55435	0.0042735
ALB	809	0.642769	0.33869	0.0185414	0.526923	0.0288462	0.0547445	0.51215	1.79931	0.0188917
ALCAM	603	0.661692	0.330017	0.00829187	0.498747	0.0125313	0.0251256	0.492574	1.95588	0.0083612
ALDH16A1	1422	0.666667	0.311533	0.0218003	0.4673	0.0327004	0.0699774	0.452503	2	0.0222861
ALDH18A1	777	0.660232	0.316602	0.023166	0.479532	0.0350877	0.0731707	0.463277	1.94318	0.0237154
ALDH1A1	495	0.632323	0.359596	0.00808081	0.56869	0.0127796	0.0224719	0.561514	1.71978	0.00814664
ALDH1A2	572	0.648601	0.339161	0.0122378	0.522911	0.0188679	0.0360825	0.513228	1.84577	0.0123894
ALDH1A3	521	0.608445	0.378119	0.0134357	0.621451	0.022082	0.035533	0.608025	1.55392	0.0136187
ALDH1B1	714	0.677871	0.298319	0.0238095	0.440083	0.035124	0.0798122	0.42515	2.10435	0.0243902
ALDH1L1	1174	0.66184	0.32368	0.0144804	0.48906	0.021879	0.0447368	0.478589	1.95718	0.0146932
ALDH1L2	904	0.68031	0.290929	0.0287611	0.427642	0.0422764	0.0988593	0.410296	2.12803	0.0296128
ALDH2	639	0.621283	0.359937	0.0187793	0.579345	0.0302267	0.0521739	0.562347	1.6405	0.0191388
ALDH3A1	950	0.662105	0.309474	0.0284211	0.467409	0.0429253	0.0918367	0.448171	1.9595	0.0292524
ALDH3B2	614	0.68241	0.294788	0.0228013	0.431981	0.0334129	0.0773481	0.418014	2.14872	0.0233333
ALDH4A1	864	0.627315	0.355324	0.0173611	0.566421	0.0276753	0.0488599	0.551167	1.68323	0.0176678
ALDH5A1	906	0.668874	0.317881	0.013245	0.475248	0.019802	0.0416667	0.466019	2.02	0.0134228
ALDH6A1	1290	0.682171	0.294574	0.0232558	0.431818	0.0340909	0.0789474	0.417582	2.14634	0.0238095
ALDH8A1	583	0.663808	0.312178	0.0240137	0.470284	0.0361757	0.0769231	0.453865	1.97449	0.0246046
ALDOB	589	0.63837	0.329372	0.0322581	0.515957	0.0505319	0.0979381	0.491139	1.76526	0.0333333
ALG1	1017	0.641101	0.325467	0.0334317	0.507669	0.0521472	0.102719	0.482507	1.7863	0.034588
ALG10	483	0.689441	0.271222	0.0393375	0.393393	0.0570571	0.145038	0.372159	2.22	0.0409483
ALG10B	553	0.745027	0.218807	0.0361664	0.293689	0.0485437	0.165289	0.280093	2.92199	0.0375235
ALG13	917	0.664122	0.323882	0.0119956	0.487685	0.0180624	0.037037	0.479032	1.97727	0.0121413
ALG9	685	0.652555	0.319708	0.0277372	0.489933	0.0425056	0.086758	0.469957	1.87815	0.0285285
ALK	2453	0.656339	0.326131	0.0175296	0.496894	0.0267081	0.05375	0.483969	1.90985	0.0178423
ALKBH8	689	0.711176	0.268505	0.0203193	0.377551	0.0285714	0.0756757	0.367063	2.46231	0.0207407
ALLC	676	0.680473	0.288462	0.0310651	0.423913	0.0456522	0.107692	0.405405	2.12963	0.0320611
ALOX12	864	0.650463	0.305556	0.0439815	0.469751	0.0676157	0.143939	0.44	1.86093	0.0460048
ALOX12B	823	0.667072	0.312272	0.0206561	0.468124	0.0309654	0.0661479	0.454064	2.00365	0.0210918
ALOX15	898	0.639198	0.324053	0.0367483	0.506969	0.0574913	0.113402	0.479407	1.7716	0.0381503
ALOX15B	939	0.658147	0.308839	0.0330138	0.469256	0.0501618	0.106897	0.446841	1.92523	0.034141
ALOX5	892	0.642377	0.334081	0.0235426	0.52007	0.0366492	0.0704698	0.501684	1.79624	0.0241102
ALOXE3	1180	0.669492	0.295763	0.0347458	0.441772	0.0518987	0.117479	0.419976	2.02564	0.0359965
ALPI	790	0.634177	0.332911	0.0329114	0.52495	0.0518962	0.0988593	0.499051	1.73356	0.0340314
ALPK1	1480	0.695946	0.268919	0.0351351	0.386408	0.0504854	0.130653	0.367837	2.28889	0.0364146
ALPK2	2477	0.685103	0.289059	0.0258377	0.421921	0.0377136	0.0893855	0.406587	2.17564	0.026523
ALPK3	2276	0.677944	0.297452	0.0246046	0.438756	0.0362929	0.0827179	0.42339	2.10505	0.0252252
ALPL	704	0.62642	0.339489	0.0340909	0.54195	0.0544218	0.100418	0.513978	1.67681	0.0352941
ALPP	884	0.678733	0.299774	0.0214932	0.441667	0.0316667	0.0716981	0.42811	2.11268	0.0219653
ALS2	1678	0.678188	0.294398	0.0274136	0.434095	0.0404218	0.0931174	0.41723	2.10741	0.0281863
ALS2CL	1404	0.633903	0.323362	0.042735	0.510112	0.0674157	0.132159	0.477895	1.73152	0.0446429
ALX1	380	0.723684	0.265789	0.0105263	0.367273	0.0145455	0.039604	0.362007	2.61905	0.0106383
ALX4	633	0.612954	0.363349	0.0236967	0.592784	0.0386598	0.0652174	0.57072	1.58367	0.0242718
AMACR	549	0.690346	0.289617	0.0200364	0.419525	0.0290237	0.0691824	0.407692	2.22941	0.0204461
AMBN	569	0.72935	0.256591	0.0140598	0.351807	0.0192771	0.0547945	0.345154	2.69481	0.0142602
AMBP	450	0.695556	0.275556	0.0288889	0.396166	0.0415335	0.104839	0.380368	2.28467	0.0297483
AMBRA1	1415	0.656537	0.330035	0.0134276	0.502691	0.0204521	0.0406852	0.492616	1.91152	0.0136103
AMDHD1	634	0.700315	0.282334	0.0173502	0.403153	0.0247748	0.0614525	0.393407	2.33684	0.0176565
AMDHD2	1081	0.607771	0.362627	0.0296022	0.596651	0.0487062	0.0816327	0.56894	1.54953	0.0305052
AMER1	1001	0.719281	0.264735	0.015984	0.368056	0.0222222	0.0603774	0.360054	2.56228	0.0162437
AMFR	667	0.653673	0.32084	0.0254873	0.490826	0.0389908	0.0794393	0.472406	1.88745	0.0261538
AMHR2	749	0.640854	0.307076	0.0520694	0.479167	0.08125	0.169565	0.44316	1.78439	0.0549296
AMIGO2	1008	0.661706	0.335317	0.00297619	0.506747	0.00449775	0.00887574	0.504478	1.95601	0.00298507
AMOT	784	0.688776	0.302296	0.00892857	0.438889	0.012963	0.0295359	0.433272	2.21311	0.00900901
AMOTL1	1163	0.672399	0.312124	0.0154772	0.464194	0.0230179	0.0495868	0.45375	2.05249	0.0157205
AMOTL2	1072	0.68097	0.307836	0.011194	0.452055	0.0164384	0.0363636	0.444744	2.1345	0.0113208
AMPD1	917	0.715376	0.251908	0.0327154	0.352134	0.0457317	0.12987	0.336735	2.51341	0.0338219
AMPD2	1120	0.616964	0.364286	0.01875	0.590449	0.0303907	0.0514706	0.573034	1.61072	0.0191083
AMPD3	900	0.667778	0.314444	0.0177778	0.470882	0.0266223	0.0565371	0.458671	2.01003	0.0180995
AMPH	1341	0.690529	0.287845	0.0216257	0.416847	0.0313175	0.0751295	0.404188	2.23133	0.0221037
AMY2B	749	0.724967	0.236315	0.0387183	0.325967	0.053407	0.163842	0.309441	2.63592	0.0402778
AMZ1	2365	0.641438	0.334884	0.0236786	0.522083	0.036915	0.0707071	0.503497	1.78892	0.0242529
ANAPC1	1802	0.674806	0.310766	0.0144284	0.460526	0.0213816	0.0464286	0.450886	2.07509	0.0146396
ANAPC2	1669	0.609347	0.382864	0.0077891	0.628319	0.0127827	0.0203443	0.620388	1.55982	0.00785024
ANAPC4	680	0.651471	0.323529	0.025	0.496614	0.0383747	0.0772727	0.478261	1.8692	0.025641
ANAPC5	719	0.617524	0.357441	0.0250348	0.578829	0.0405405	0.0700389	0.556277	1.61455	0.0256776
ANAPC7	594	0.62963	0.348485	0.0218855	0.553476	0.0347594	0.0628019	0.534884	1.7	0.0223752
ANGEL1	744	0.658602	0.306452	0.0349462	0.465306	0.0530612	0.114035	0.44186	1.92913	0.0362117
ANGPT1	446	0.681614	0.307175	0.0112108	0.450658	0.0164474	0.0364964	0.443366	2.14085	0.0113379
ANGPT2	1332	0.653153	0.340841	0.00600601	0.521839	0.0091954	0.0176211	0.517084	1.88312	0.0060423
ANGPT4	662	0.6571	0.308157	0.0347432	0.468966	0.0528736	0.112745	0.445415	1.9163	0.0359937
ANGPTL1	381	0.435696	0.503937	0.0603675	1.15663	0.138554	0.119792	1.01587	0.772093	0.0642458
ANGPTL2	574	0.642857	0.336237	0.0209059	0.523035	0.0325203	0.0621762	0.506562	1.8	0.0213523
ANGPTL4	601	0.652246	0.314476	0.0332779	0.482143	0.0510204	0.10582	0.458738	1.8756	0.0344234
ANGPTL5	539	0.747681	0.215213	0.0371058	0.287841	0.0496278	0.172414	0.274232	2.96324	0.0385356
ANK1	2404	0.640183	0.351913	0.00790349	0.549708	0.0123457	0.0224586	0.543004	1.77919	0.00796646
ANK2	4422	0.690185	0.303935	0.00587969	0.440367	0.008519	0.0193452	0.436647	2.22774	0.00591447
ANK3	4566	0.672799	0.322602	0.00459921	0.479492	0.00683594	0.0142566	0.476237	2.05622	0.00462046
ANKAR	2469	0.699473	0.26772	0.0328068	0.382745	0.0469021	0.122542	0.365597	2.32749	0.0339196
ANKFN1	1392	0.688937	0.287356	0.0237069	0.417101	0.0344108	0.0825	0.403226	2.21478	0.0242826
ANKFY1	1388	0.636888	0.351585	0.0115274	0.552036	0.0180995	0.0327869	0.542222	1.75397	0.0116618
ANKH	689	0.580552	0.415094	0.00435414	0.715	0.0075	0.0104895	0.709677	1.38408	0.00437318
ANKHD1	14	0.785714	0.214286	0	0.272727	0	0	0.272727	3.66667	0
ANKHD1-EIF4EBP3	343	0.644315	0.326531	0.0291545	0.506787	0.0452489	0.0892857	0.484848	1.81148	0.03003
ANKIB1	877	0.68301	0.309008	0.00798176	0.452421	0.0116861	0.0258303	0.447195	2.15468	0.00804598
ANKK1	1169	0.668948	0.298546	0.0325064	0.446292	0.0485934	0.108883	0.42561	2.02067	0.0335986
ANKLE1	993	0.656596	0.312185	0.0312185	0.47546	0.047546	0.1	0.45388	1.91202	0.0322245
ANKLE2	1271	0.65775	0.324154	0.018096	0.492823	0.027512	0.0558252	0.479627	1.92184	0.0184295
ANKMY1	2006	0.669492	0.301595	0.0289133	0.450484	0.0431869	0.0958678	0.431834	2.02564	0.0297741
ANKRD11	4358	0.626434	0.358192	0.015374	0.571795	0.0245421	0.0429212	0.558098	1.6769	0.0156141
ANKRD12	2109	0.690375	0.297297	0.0123281	0.430632	0.0178571	0.0414673	0.423077	2.22971	0.012482
ANKRD13B	691	0.628075	0.354559	0.0173661	0.564516	0.0276498	0.0489796	0.549327	1.68872	0.017673
ANKRD13C	925	0.647568	0.340541	0.0118919	0.525876	0.0183639	0.0349206	0.516393	1.83742	0.012035
ANKRD13D	985	0.653807	0.336041	0.0101523	0.513975	0.015528	0.0302115	0.506116	1.88856	0.0102564
ANKRD17	2098	0.612965	0.383699	0.00333651	0.625972	0.00544323	0.00869565	0.622583	1.58374	0.00334768
ANKRD18A	1302	0.708141	0.256528	0.0353303	0.362256	0.0498915	0.137725	0.345041	2.42632	0.0366242
ANKRD18B	1173	0.70162	0.261722	0.0366581	0.373026	0.0522479	0.140065	0.354503	2.35143	0.0380531
ANKRD24	2302	0.669418	0.310599	0.0199826	0.463984	0.0298507	0.0643357	0.450536	2.02497	0.0203901
ANKRD26	2143	0.708353	0.259916	0.0317312	0.36693	0.0447958	0.122083	0.351198	2.4288	0.0327711
ANKRD27	1681	0.646044	0.325402	0.0285544	0.503683	0.0441989	0.0877514	0.482363	1.82521	0.0293938
ANKRD28	1354	0.915066	0.0753323	0.00960118	0.0823245	0.0104923	0.127451	0.0814696	10.7739	0.00969426
ANKRD30A	1924	0.702183	0.261954	0.0358628	0.373057	0.0510733	0.136905	0.35493	2.35777	0.0371968
ANKRD30B	1861	0.692101	0.268673	0.0392262	0.388199	0.056677	0.146	0.367377	2.24782	0.0408277
ANKRD31	1692	0.726359	0.244681	0.0289598	0.336859	0.0398698	0.118357	0.323944	2.65443	0.0298235
ANKRD33	718	0.643454	0.314763	0.0417827	0.489177	0.0649351	0.132743	0.45935	1.80469	0.0436047
ANKRD34A	501	0.618762	0.377246	0.00399202	0.609677	0.00645161	0.010582	0.605769	1.62304	0.00400802
ANKRD34B	535	0.695327	0.257944	0.046729	0.370968	0.0672043	0.181159	0.347607	2.28221	0.0490196
ANKRD34C	495	0.656566	0.333333	0.010101	0.507692	0.0153846	0.030303	0.5	1.91176	0.0102041
ANKRD35	1291	0.663052	0.29512	0.041828	0.445093	0.0630841	0.141732	0.418681	1.96782	0.043654
ANKRD36	2464	0.726055	0.235795	0.0381494	0.324762	0.0525433	0.16179	0.30855	2.65037	0.0396624
ANKRD36C	2505	0.720559	0.253892	0.0255489	0.352355	0.0354571	0.100629	0.340289	2.57857	0.0262188
ANKRD44	1071	0.67507	0.318394	0.00653595	0.471646	0.00968188	0.0205279	0.467123	2.07759	0.00657895
ANKRD50	1454	0.672627	0.314993	0.0123796	0.468303	0.0184049	0.0393013	0.459839	2.05462	0.0125348
ANKRD52	1067	0.585754	0.408622	0.00562324	0.6976	0.0096	0.0137615	0.690967	1.41403	0.00565504
ANKRD55	781	0.6863	0.279129	0.0345711	0.406716	0.0503731	0.123853	0.387211	2.18776	0.035809
ANKRD6	960	0.683333	0.286458	0.0302083	0.419207	0.0442073	0.105455	0.40146	2.15789	0.0311493
ANKS1A	1384	0.622832	0.364884	0.0122832	0.585847	0.0197216	0.0336634	0.574516	1.65134	0.012436
ANKS1B	1166	0.641509	0.346484	0.0120069	0.540107	0.0187166	0.0346535	0.530184	1.78947	0.0121528
ANKS3	1134	0.664903	0.319224	0.015873	0.480106	0.0238727	0.0497238	0.468912	1.98421	0.016129
ANKS4B	406	0.672414	0.29803	0.0295567	0.443223	0.043956	0.0991736	0.424561	2.05263	0.0304569
ANKS6	1228	0.683225	0.292345	0.02443	0.42789	0.0357569	0.0835655	0.413119	2.15681	0.0250417
ANKZF1	1066	0.67167	0.287054	0.0412758	0.427374	0.0614525	0.143791	0.402632	2.04571	0.0430528
ANLN	1218	0.729885	0.252874	0.0172414	0.346457	0.023622	0.0681818	0.338462	2.70213	0.0175439
ANO1	1182	0.626058	0.35956	0.0143824	0.574324	0.022973	0.04	0.561427	1.67421	0.0145923
ANO10	871	0.685419	0.273249	0.0413318	0.39866	0.0603015	0.151261	0.375987	2.17883	0.0431138
ANO2	1315	0.688213	0.28289	0.0288973	0.41105	0.041989	0.102151	0.394486	2.20732	0.0297572
ANO3	963	0.639668	0.312565	0.0477674	0.488636	0.0746753	0.152824	0.454683	1.77522	0.0501636
ANO4	1057	0.674551	0.292337	0.0331126	0.43338	0.0490884	0.113269	0.413102	2.07267	0.0342466
ANO5	1083	0.680517	0.266851	0.0526316	0.39213	0.0773406	0.197232	0.36398	2.13006	0.0555556
ANO6	1095	0.669406	0.292237	0.0383562	0.436562	0.0572988	0.13125	0.412903	2.02486	0.039886
ANO7	1761	0.62067	0.334469	0.0448609	0.538884	0.0722781	0.134126	0.50256	1.63623	0.0469679
ANO8	1598	0.576345	0.408636	0.0150188	0.709012	0.0260586	0.0367534	0.691005	1.36041	0.0152478
ANO9	1659	0.649789	0.328511	0.0216998	0.505566	0.0333952	0.066055	0.489228	1.85542	0.0221811
ANP32C	569	0.829525	0.1529	0.0175747	0.184322	0.0211864	0.114943	0.180498	4.86598	0.0178891
ANPEP	814	0.971744	0	0.0282555	0	0.0290771		0	34.3913	0.0290771
ANTXR1	689	0.626996	0.361393	0.011611	0.576389	0.0185185	0.0321285	0.565909	1.68093	0.0117474
ANTXR2	592	0.697635	0.280405	0.0219595	0.401937	0.031477	0.0783133	0.389671	2.30726	0.0224525
ANXA10	379	0.680739	0.282322	0.0369393	0.414729	0.0542636	0.130841	0.393382	2.13223	0.0383562
ANXA13	500	0.674	0.296	0.03	0.439169	0.0445104	0.101351	0.420455	2.06748	0.0309278
ANXA6	808	0.684406	0.29703	0.0185644	0.433996	0.0271248	0.0625	0.422535	2.16863	0.0189155
AOAH	883	0.670442	0.293318	0.0362401	0.4375	0.0540541	0.123552	0.415064	2.03436	0.0376028
AOC2	1030	0.681553	0.287379	0.031068	0.421652	0.045584	0.108108	0.40327	2.14024	0.0320641
AOC3	1047	0.65043	0.320917	0.0286533	0.493392	0.0440529	0.0892857	0.472574	1.86066	0.0294985
AOX1	1590	0.701258	0.267925	0.0308176	0.382063	0.0439462	0.115023	0.365979	2.34737	0.0317975
AP1B1	1015	0.585222	0.410837	0.00394089	0.70202	0.00673401	0.00959233	0.697324	1.41093	0.00395648
AP1G1	738	0.630081	0.363144	0.00677507	0.576344	0.0107527	0.0186567	0.570213	1.7033	0.00682128
AP1G2	1291	0.678544	0.29512	0.0263362	0.434932	0.0388128	0.0892388	0.418681	2.11084	0.0270485
AP1M1	388	0.502577	0.481959	0.0154639	0.958974	0.0307692	0.0320856	0.930348	1.01036	0.0157068
AP2A1	1233	0.583942	0.407137	0.00892133	0.697222	0.0152778	0.0219124	0.686731	1.40351	0.00900164
AP2A2	1000	0.589	0.406	0.005	0.689304	0.00848896	0.0123153	0.683502	1.43309	0.00502513
AP2M1	271	0.402214	0.597786	0	1.48624	0	0	1.48624	0.67284	0
AP3B1	1072	0.705224	0.277052	0.0177239	0.392857	0.0251323	0.0639731	0.383226	2.39241	0.0180437
AP3B2	1209	0.645161	0.340778	0.0140612	0.528205	0.0217949	0.0412621	0.516939	1.81818	0.0142617
AP3D1	1520	0.617763	0.373684	0.00855263	0.604899	0.0138445	0.0228873	0.596639	1.61618	0.00862641
AP4B1	1002	0.695609	0.277445	0.0269461	0.398852	0.0387374	0.0971223	0.383978	2.28525	0.0276923
AP4E1	1184	0.6875	0.294764	0.0177365	0.428747	0.0257985	0.0601719	0.417964	2.2	0.0180567
AP4M1	985	0.647716	0.327919	0.0243655	0.50627	0.0376176	0.0743034	0.487915	1.83862	0.024974
AP5B1	1376	0.631541	0.345203	0.0232558	0.546605	0.0368239	0.0673684	0.527192	1.714	0.0238095
APAF1	1342	0.687034	0.292846	0.0201192	0.426247	0.0292842	0.0687023	0.41412	2.19524	0.0205323
APBA1	1089	0.61708	0.372819	0.010101	0.604167	0.016369	0.0270936	0.594436	1.61151	0.0102041
APBA2	928	0.630388	0.359914	0.00969828	0.57094	0.0153846	0.0269461	0.56229	1.70554	0.00979325
APBB1	829	0.655006	0.332931	0.0120627	0.508287	0.0184162	0.0362319	0.499096	1.8986	0.01221
APBB1IP	749	0.65287	0.341789	0.00534045	0.523517	0.00817996	0.015625	0.51927	1.88077	0.00536913
APBB2	794	0.634761	0.352645	0.0125945	0.555556	0.0198413	0.0357143	0.544747	1.73793	0.0127551
APBB3	814	0.660934	0.321867	0.017199	0.486989	0.0260223	0.0534351	0.474638	1.94928	0.0175
APC	5738	0.690659	0.261938	0.0474033	0.379258	0.0686349	0.180971	0.3549	2.23268	0.0497622
APC2	3745	0.640053	0.353004	0.00694259	0.551523	0.0108469	0.0196672	0.545605	1.77819	0.00699113
APCDD1	786	0.66285	0.319338	0.0178117	0.481766	0.0268714	0.0557769	0.469159	1.96604	0.0181347
APCDD1L	795	0.665409	0.316981	0.0176101	0.476371	0.026465	0.0555556	0.464088	1.98872	0.0179257
APCS	323	0.640867	0.312693	0.0464396	0.487923	0.0724638	0.148515	0.454955	1.78448	0.0487013
APEH	1031	0.645975	0.316198	0.0378274	0.489489	0.0585586	0.119632	0.462411	1.82466	0.0393145
APEX2	490	0.689796	0.308163	0.00204082	0.446746	0.00295858	0.00662252	0.445428	2.22368	0.00204499
APLNR	523	0.627151	0.367113	0.00573614	0.585366	0.00914634	0.015625	0.58006	1.68205	0.00576923
APLP1	827	0.636034	0.350665	0.0133011	0.551331	0.0209125	0.037931	0.540037	1.74751	0.0134804
APLP2	986	0.707911	0.279919	0.0121704	0.395415	0.017192	0.0434783	0.388732	2.42361	0.0123203
APOA4	627	0.661882	0.30622	0.0318979	0.462651	0.0481928	0.104167	0.441379	1.95755	0.0329489
APOA5	846	0.682033	0.300236	0.0177305	0.440208	0.0259965	0.0590551	0.429054	2.14498	0.0180505
APOB	5970	0.69263	0.288275	0.0190955	0.416203	0.0275695	0.0662406	0.405036	2.25341	0.0194672
APOBR	1518	0.661397	0.310935	0.027668	0.47012	0.0418327	0.0889831	0.451243	1.95331	0.0284553
APOH	480	0.710417	0.264583	0.025	0.372434	0.0351906	0.0944882	0.359773	2.45324	0.025641
APOL5	579	0.677029	0.283247	0.0397237	0.418367	0.0586735	0.140244	0.395181	2.09626	0.0413669
APP	890	0.670787	0.31573	0.0134831	0.470687	0.0201005	0.0427046	0.461412	2.03754	0.0136674
APPBP2	412	0.575243	0.417476	0.00728155	0.725738	0.0126582	0.0174419	0.716667	1.35429	0.00733496
APPL1	766	0.715405	0.265013	0.0195822	0.370438	0.0273723	0.0738916	0.360568	2.51376	0.0199734
APPL2	750	0.68	0.286667	0.0333333	0.421569	0.0490196	0.116279	0.401869	2.125	0.0344828
AQP10	459	0.607843	0.374728	0.0174292	0.616487	0.0286738	0.0465116	0.599303	1.55	0.0177384
AQP7	584	0.669521	0.291096	0.0393836	0.434783	0.0588235	0.135294	0.410628	2.02591	0.0409982
AQP8	307	0.638436	0.345277	0.0162866	0.540816	0.0255102	0.0471698	0.527363	1.76577	0.0165563
AQR	1206	0.645937	0.341625	0.0124378	0.528883	0.0192555	0.0364078	0.518892	1.82436	0.0125945
AR	1008	0.655754	0.3125	0.031746	0.476551	0.0484115	0.101587	0.454545	1.9049	0.0327869
ARAF	469	0.588486	0.398721	0.0127932	0.677536	0.0217391	0.0320856	0.663121	1.43005	0.012959
ARAP1	1814	0.64333	0.341786	0.0148842	0.531277	0.0231362	0.0435484	0.519263	1.80371	0.0151091
ARAP2	1916	0.730167	0.251566	0.0182672	0.344532	0.0250179	0.0726141	0.336123	2.706	0.0186071
ARAP3	1770	0.675141	0.310169	0.0146893	0.459414	0.0217573	0.0473588	0.449631	2.07826	0.0149083
ARC	483	0.581781	0.399586	0.0186335	0.686833	0.0320285	0.0466321	0.665517	1.39109	0.0189873
ARFGAP2	1073	0.699907	0.28425	0.0158434	0.406125	0.0226365	0.0557377	0.397135	2.3323	0.0160985
ARFGEF1	1288	0.614907	0.376553	0.00854037	0.612374	0.0138889	0.0226804	0.603985	1.59677	0.00861394
ARFGEF2	1605	0.671651	0.317757	0.0105919	0.473098	0.0157699	0.0333333	0.465753	2.04554	0.0107053
ARHGAP10	929	0.68676	0.292788	0.0204521	0.426332	0.0297806	0.0698529	0.414003	2.19244	0.0208791
ARHGAP11A	1060	0.717925	0.251887	0.0301887	0.350854	0.0420499	0.11985	0.336696	2.54515	0.0311284
ARHGAP12	853	0.688159	0.288394	0.0234467	0.41908	0.0340716	0.0813008	0.405272	2.20677	0.0240096
ARHGAP15	640	0.70625	0.267188	0.0265625	0.378319	0.0376106	0.0994152	0.364606	2.40426	0.0272873
ARHGAP17	998	0.673347	0.315631	0.011022	0.46875	0.016369	0.0349206	0.461201	2.06135	0.0111449
ARHGAP18	754	0.68435	0.28382	0.0318302	0.414729	0.0465116	0.11215	0.396296	2.16807	0.0328767
ARHGAP20	1195	0.688703	0.295397	0.0158996	0.428919	0.0230863	0.0538244	0.41924	2.21237	0.0161565
ARHGAP21	2125	0.667294	0.316235	0.0164706	0.473907	0.0246827	0.0520833	0.462491	2.00566	0.0167464
ARHGAP22	1382	0.668596	0.314761	0.0166425	0.470779	0.0248918	0.0528736	0.459345	2.01747	0.0169242
ARHGAP24	905	0.689503	0.283978	0.0265193	0.411859	0.0384615	0.0933852	0.396605	2.22064	0.0272418
ARHGAP25	770	0.698701	0.281818	0.0194805	0.403346	0.027881	0.0691244	0.392405	2.31897	0.0198675
ARHGAP26	970	0.628866	0.349485	0.0216495	0.555738	0.0344262	0.0619469	0.537242	1.69444	0.0221286
ARHGAP27	1354	0.648449	0.330133	0.021418	0.509112	0.0330296	0.064877	0.492834	1.84454	0.0218868
ARHGAP28	875	0.672	0.301714	0.0262857	0.44898	0.0391156	0.0871212	0.432079	2.04878	0.0269953
ARHGAP29	1173	0.712702	0.2711	0.0161978	0.380383	0.0227273	0.0597484	0.37193	2.48071	0.0164645
ARHGAP3	4	1	0	0	0	0		0		0
ARHGAP30	1392	0.696839	0.298132	0.00502874	0.427835	0.00721649	0.0168675	0.42477	2.29858	0.00505415
ARHGAP31	1512	0.693122	0.297619	0.00925926	0.429389	0.0133588	0.0311111	0.423729	2.25862	0.00934579
ARHGAP32	2156	0.673006	0.316327	0.0106679	0.470021	0.0158511	0.0337243	0.462687	2.05816	0.0107829
ARHGAP33	1857	0.641357	0.344642	0.0140011	0.537364	0.0218304	0.040625	0.525883	1.78829	0.0141999
ARHGAP35	1264	0.640032	0.35443	0.00553797	0.55377	0.00865266	0.015625	0.54902	1.77802	0.00556881
ARHGAP36	405	0.750617	0.246914	0.00246914	0.328947	0.00328947	0.01	0.327869	3.0099	0.00247525
ARHGAP39	1843	0.628866	0.358112	0.0130222	0.569456	0.0207075	0.0363636	0.557904	1.69444	0.0131941
ARHGAP4	1033	0.629235	0.363988	0.00677638	0.578462	0.0107692	0.018617	0.572298	1.69713	0.00682261
ARHGAP40	742	0.649596	0.322102	0.0283019	0.495851	0.0435685	0.0878661	0.475149	1.85385	0.0291262
ARHGAP42	673	0.628529	0.356612	0.0148588	0.567376	0.0236407	0.0416667	0.554273	1.692	0.015083
ARHGAP44	884	0.597285	0.391403	0.0113122	0.655303	0.0189394	0.0289017	0.643123	1.48315	0.0114416
ARHGAP5	1323	0.667423	0.321995	0.010582	0.482446	0.015855	0.0328638	0.474916	2.00682	0.0106952
ARHGAP6	1022	0.625245	0.3591	0.0156556	0.574335	0.0250391	0.0435967	0.560305	1.66841	0.0159046
ARHGAP9	1576	0.695431	0.281091	0.0234772	0.404197	0.0337591	0.0835214	0.390997	2.28333	0.0240416
ARHGEF1	1053	0.630579	0.351377	0.0180437	0.557229	0.0286145	0.0513514	0.541728	1.70694	0.0183752
ARHGEF10	2246	0.67008	0.304541	0.0253785	0.454485	0.0378738	0.0833333	0.4379	2.03104	0.0260393
ARHGEF10L	1730	0.634104	0.355491	0.0104046	0.56062	0.0164084	0.0292683	0.55157	1.73302	0.010514
ARHGEF11	2254	0.699201	0.295475	0.00532387	0.422589	0.00761421	0.018018	0.419395	2.32448	0.00535236
ARHGEF12	1284	0.686137	0.304517	0.00934579	0.443814	0.0136209	0.0306905	0.43785	2.1861	0.00943396
ARHGEF15	1143	0.67629	0.309711	0.0139983	0.457956	0.0206986	0.0451977	0.448669	2.08919	0.014197
ARHGEF16	963	0.645898	0.331256	0.0228453	0.512862	0.0353698	0.0689655	0.495342	1.82405	0.0233794
ARHGEF17	2852	0.665849	0.322581	0.0115708	0.484466	0.0173776	0.0358696	0.47619	1.99265	0.0117063
ARHGEF18	2053	0.645397	0.338042	0.0165611	0.523774	0.0256604	0.0489914	0.51067	1.82005	0.01684
ARHGEF19	1045	0.661244	0.302392	0.0363636	0.457308	0.0549928	0.120253	0.433471	1.95198	0.0377358
ARHGEF2	1117	0.622202	0.359893	0.0179051	0.578417	0.028777	0.0497512	0.562238	1.64692	0.0182315
ARHGEF25	873	0.670103	0.305842	0.024055	0.45641	0.0358974	0.0786517	0.440594	2.03125	0.0246479
ARHGEF26	1247	0.668805	0.304731	0.0264635	0.455635	0.0395683	0.0868421	0.438293	2.01937	0.0271829
ARHGEF3	916	0.648472	0.319869	0.0316594	0.493266	0.0488215	0.0989761	0.470305	1.84472	0.0326945
ARHGEF33	1436	0.657382	0.331476	0.0111421	0.504237	0.0169492	0.0336134	0.495833	1.9187	0.0112676
ARHGEF37	839	0.707986	0.261025	0.0309893	0.368687	0.043771	0.118721	0.353226	2.42449	0.0319803
ARHGEF4	2348	0.668654	0.310477	0.0208688	0.464331	0.0312102	0.0672154	0.450278	2.01799	0.0213136
ARHGEF40	1939	0.659618	0.317174	0.0232078	0.480844	0.0351837	0.0731707	0.464502	1.93788	0.0237592
ARHGEF5	1560	0.698718	0.262179	0.0391026	0.375229	0.0559633	0.149144	0.355343	2.31915	0.0406938
ARHGEF6	515	0.675728	0.31068	0.0135922	0.45977	0.0201149	0.04375	0.450704	2.08383	0.0137795
ARHGEF7	938	0.616205	0.376333	0.00746269	0.610727	0.0121107	0.01983	0.603419	1.60556	0.0075188
ARHGEF9	315	0.555556	0.422222	0.0222222	0.76	0.04	0.0526316	0.730769	1.25	0.0227273
ARID1A	2504	0.623403	0.36901	0.00758786	0.591928	0.0121717	0.0205628	0.58481	1.65536	0.00764588
ARID1B	3270	0.561468	0.297248	0.141284	0.529412	0.251634	0.475309	0.422977	1.28033	0.16453
ARID2	1698	0.645465	0.339223	0.0153121	0.525547	0.0237226	0.0451389	0.513369	1.8206	0.0155502
ARID3A	850	0.601176	0.389412	0.00941176	0.64775	0.0156556	0.0241692	0.637765	1.50737	0.00950119
ARID3B	615	0.656911	0.331707	0.0113821	0.50495	0.0173267	0.0343137	0.49635	1.91469	0.0115132
ARID3C	861	0.708479	0.270616	0.0209059	0.381967	0.0295082	0.0772532	0.371019	2.43028	0.0213523
ARID4A	1208	0.692881	0.293046	0.0140728	0.422939	0.0203106	0.0480226	0.41452	2.25606	0.0142737
ARID4B	1126	0.702487	0.28952	0.0079929	0.412137	0.011378	0.0276074	0.4075	2.36119	0.0080573
ARID5A	754	0.647215	0.340849	0.0119363	0.526639	0.0184426	0.0350195	0.517103	1.83459	0.0120805
ARID5B	1148	0.650697	0.344948	0.0043554	0.53012	0.00669344	0.0126263	0.526596	1.86284	0.00437445
ARIH2	398	0.565327	0.414573	0.0201005	0.733333	0.0355556	0.0484848	0.708155	1.30058	0.0205128
ARMC2	1072	0.653918	0.324627	0.0214552	0.496434	0.0328103	0.066092	0.480663	1.88949	0.0219256
ARMC3	921	0.716612	0.247557	0.0358306	0.345455	0.05	0.144737	0.329004	2.52874	0.0371622
ARMC4	1290	0.685271	0.277519	0.0372093	0.404977	0.0542986	0.134078	0.38412	2.17734	0.0386473
ARMC5	1668	0.621103	0.363309	0.0155875	0.584942	0.0250965	0.0429043	0.570621	1.63924	0.0158343
ARMC6	640	0.66875	0.301563	0.0296875	0.450935	0.0443925	0.0984456	0.431767	2.01887	0.0305958
ARMC8	664	0.637048	0.356928	0.0060241	0.560284	0.00945626	0.0168776	0.555035	1.75519	0.00606061
ARMC9	1316	0.655015	0.31307	0.0319149	0.477958	0.0487239	0.101942	0.455752	1.89868	0.032967
ARMCX1	263	0.604563	0.380228	0.0152091	0.628931	0.0251572	0.04	0.613497	1.52885	0.015444
ARMCX2	437	0.622426	0.375286	0.00228833	0.602941	0.00367647	0.00609756	0.600733	1.64848	0.00229358
ARMCX5	371	0.708895	0.272237	0.0188679	0.38403	0.026616	0.0693069	0.374074	2.43519	0.0192308
ARNT	774	0.670543	0.321705	0.00775194	0.479769	0.0115607	0.0240964	0.474286	2.03529	0.0078125
ARNT2	723	0.648686	0.341632	0.00968188	0.526652	0.0149254	0.0283401	0.518908	1.84646	0.00977654
ARNTL	559	0.642218	0.345259	0.0125224	0.537604	0.0194986	0.0362694	0.527322	1.795	0.0126812
ARNTL2	662	0.708459	0.26435	0.0271903	0.373134	0.0383795	0.102857	0.359343	2.43005	0.0279503
ARPP21	981	0.686035	0.293578	0.0203874	0.427935	0.0297177	0.0694444	0.415584	2.18506	0.0208117
ARRB1	494	0.605263	0.388664	0.00607287	0.64214	0.0100334	0.015625	0.635762	1.53333	0.00610998
ARSB	789	0.688213	0.269962	0.0418251	0.392265	0.0607735	0.15493	0.369792	2.20732	0.0436508
ARSD	670	0.661194	0.31791	0.0208955	0.480813	0.0316027	0.0657277	0.466083	1.95154	0.0213415
ARSF	623	0.630819	0.337079	0.0321027	0.534351	0.0508906	0.0952381	0.508475	1.7087	0.0331675
ARSG	2007	0.661684	0.327354	0.0109616	0.494729	0.0165663	0.0334855	0.486667	1.95582	0.0110831
ARSH	509	0.697446	0.267191	0.0353635	0.383099	0.0507042	0.132353	0.364611	2.30519	0.0366599
ARSI	739	0.656292	0.305819	0.037889	0.465979	0.057732	0.123894	0.440546	1.90945	0.0393812
ARSJ	634	0.62776	0.323344	0.0488959	0.515075	0.0778894	0.15122	0.477855	1.68644	0.0514096
ARVCF	1937	0.669592	0.314404	0.0160041	0.469545	0.0239013	0.0509031	0.458584	2.02656	0.0162644
ASAP1	1040	0.606731	0.384615	0.00865385	0.633914	0.0142631	0.0225	0.625	1.54279	0.00872939
ASAP2	1186	0.631535	0.360034	0.0084317	0.570093	0.0133511	0.0234192	0.562582	1.71396	0.0085034
ASAP3	1087	0.685373	0.290708	0.023919	0.424161	0.0348993	0.0822785	0.409857	2.17836	0.0245052
ASB10	840	0.666667	0.303571	0.0297619	0.455357	0.0446429	0.0980392	0.435897	2	0.0306748
ASB15	730	0.694521	0.267123	0.0383562	0.384615	0.0552268	0.14359	0.364486	2.27354	0.039886
ASB17	313	0.686901	0.277955	0.0351438	0.404651	0.0511628	0.126437	0.384956	2.19388	0.0364238
ASB2	968	0.649793	0.320248	0.0299587	0.492846	0.0461049	0.0935484	0.471125	1.85546	0.0308839
ASB3	900	0.697778	0.27	0.0322222	0.386943	0.0461783	0.119342	0.369863	2.30882	0.0332951
ASB4	556	0.697842	0.27518	0.0269784	0.39433	0.0386598	0.0980392	0.379653	2.30952	0.0277264
ASB5	439	0.669704	0.289294	0.0410023	0.431973	0.0612245	0.141732	0.407051	2.02759	0.0427553
ASCC2	927	0.682848	0.300971	0.0161812	0.440758	0.0236967	0.0537634	0.430556	2.15306	0.0164474
ASCC3	2171	0.678029	0.293413	0.0285583	0.432745	0.0421196	0.0973312	0.415254	2.10587	0.0293978
ASH1L	2678	0.690814	0.302838	0.00634802	0.438378	0.00918919	0.0209618	0.434387	2.2343	0.00638858
ASH2L	537	0.64432	0.340782	0.0148976	0.528902	0.0231214	0.0437158	0.516949	1.81152	0.0151229
ASL	610	0.632787	0.339344	0.0278689	0.536269	0.0440415	0.0821256	0.513648	1.72321	0.0286678
ASMT	597	0.680067	0.288107	0.0318258	0.423645	0.046798	0.110465	0.404706	2.12565	0.032872
ASMTL	1040	0.625962	0.361538	0.0125	0.577573	0.0199693	0.0345745	0.566265	1.67352	0.0126582
ASNS	524	0.69084	0.270992	0.0381679	0.392265	0.0552486	0.140845	0.371728	2.23457	0.0396825
ASNSD1	731	0.686731	0.27223	0.0410397	0.396414	0.059761	0.150754	0.37406	2.19214	0.042796
ASPG	1180	0.633898	0.338983	0.0271186	0.534759	0.0427807	0.08	0.512821	1.73148	0.0278746
ASPH	1137	0.691293	0.277924	0.0307828	0.402036	0.0445293	0.110759	0.384896	2.23932	0.0317604
ASPHD1	1158	0.638169	0.345423	0.0164076	0.541272	0.0257104	0.0475	0.527704	1.76372	0.0166813
ASPM	3953	0.705034	0.255755	0.0392107	0.362756	0.0556154	0.153314	0.343644	2.39022	0.040811
ASPRV1	444	0.646396	0.335586	0.018018	0.519164	0.0278746	0.0536913	0.505085	1.82803	0.0183486
ASPSCR1	1135	0.651982	0.330396	0.0176211	0.506757	0.027027	0.0533333	0.493421	1.87342	0.0179372
ASS1	550	0.634545	0.336364	0.0290909	0.530086	0.0458453	0.0864865	0.506849	1.73632	0.0299625
ASTE1	382	0.651832	0.308901	0.039267	0.473896	0.060241	0.127119	0.44697	1.87218	0.0408719
ASTL	1361	0.68626	0.296106	0.0176341	0.431478	0.0256959	0.0595533	0.420668	2.18735	0.0179506
ASTN1	1497	0.667335	0.319973	0.0126921	0.479479	0.019019	0.039666	0.47053	2.00602	0.0128552
ASTN2	1746	0.646048	0.34307	0.010882	0.531028	0.016844	0.0317195	0.522232	1.82524	0.0110017
ASXL1	1920	0.655208	0.290625	0.0541667	0.443561	0.0826709	0.18638	0.409692	1.9003	0.0572687
ASXL2	1401	0.669522	0.324054	0.00642398	0.484009	0.00959488	0.0198238	0.479409	2.02592	0.00646552
ASXL3	2484	0.692834	0.290258	0.0169082	0.418942	0.0244044	0.0582524	0.408962	2.25557	0.017199
ASZ1	529	0.731569	0.245747	0.0226843	0.335917	0.0310078	0.0923077	0.325815	2.72535	0.0232108
ATAD2	1349	0.677539	0.309859	0.0126019	0.45733	0.0185996	0.0406699	0.44898	2.10115	0.0127628
ATAD2B	1318	0.666161	0.322458	0.0113809	0.484055	0.0170843	0.0352941	0.475924	1.99545	0.0115119
ATAD3A	1026	0.64425	0.327485	0.0282651	0.508321	0.0438729	0.0863095	0.486957	1.81096	0.0290873
ATAD3B	1495	0.665552	0.305686	0.0287625	0.459296	0.0432161	0.0940919	0.44027	1.99	0.0296143
ATAD5	1581	0.716635	0.275142	0.00822264	0.383936	0.011474	0.0298851	0.379581	2.52902	0.00829082
ATCAY	445	0.608989	0.377528	0.0134831	0.619926	0.0221402	0.0357143	0.606498	1.55747	0.0136674
ATE1	685	0.651095	0.327007	0.0218978	0.502242	0.0336323	0.0669643	0.4859	1.86611	0.0223881
ATF2	414	0.625604	0.357488	0.0169082	0.571429	0.027027	0.0472973	0.556391	1.67097	0.017199
ATF6	770	0.672727	0.303896	0.0233766	0.451737	0.034749	0.0769231	0.436567	2.05556	0.0239362
ATF6B	1038	0.665703	0.299615	0.0346821	0.450072	0.0520984	0.115756	0.427785	1.99135	0.0359281
ATF7	497	0.657948	0.334004	0.00804829	0.507645	0.0122324	0.0240964	0.501511	1.92353	0.00811359
ATF7IP	1252	0.698083	0.294728	0.0071885	0.422197	0.0102975	0.0243902	0.417894	2.31217	0.00724055
ATF7IP2	931	0.703545	0.28464	0.0118153	0.40458	0.0167939	0.0415094	0.397898	2.37319	0.0119565
ATG14	601	0.697171	0.28619	0.0166389	0.410501	0.0238663	0.0581395	0.400932	2.3022	0.0169205
ATG16L1	559	0.613596	0.366726	0.019678	0.597668	0.03207	0.0536585	0.579096	1.58796	0.020073
ATG2A	2575	0.65165	0.335534	0.0128155	0.514899	0.0196663	0.0381944	0.504968	1.87068	0.0129819
ATG2B	2153	0.689735	0.294008	0.0162564	0.426263	0.023569	0.0552923	0.416447	2.22305	0.016525
ATG4D	692	0.679191	0.300578	0.0202312	0.442553	0.0297872	0.0673077	0.429752	2.11712	0.020649
ATG7	1466	0.645975	0.341064	0.0129604	0.527983	0.0200634	0.038	0.517598	1.82466	0.0131306
ATG9A	787	0.612452	0.378653	0.00889454	0.618257	0.0145228	0.0234899	0.609407	1.58033	0.00897436
ATIC	759	0.693017	0.280632	0.0263505	0.404943	0.0380228	0.0938967	0.39011	2.25751	0.0270636
ATL1	482	0.639004	0.346473	0.0145228	0.542208	0.0227273	0.0419162	0.530159	1.77011	0.0147368
ATM	8933	0.703123	0.259263	0.0376133	0.368731	0.0534947	0.145078	0.350008	2.3684	0.0390834
ATMIN	1020	0.686275	0.302941	0.0107843	0.441429	0.0157143	0.0355987	0.434599	2.1875	0.0109019
ATN1	1560	0.660256	0.333974	0.00576923	0.505825	0.00873786	0.0172745	0.501444	1.9434	0.00580271
ATP10A	2054	0.655794	0.329601	0.0146056	0.502598	0.0222717	0.0443131	0.491649	1.90523	0.0148221
ATP10B	2002	0.687812	0.278721	0.0334665	0.405229	0.0486565	0.120072	0.386427	2.2032	0.0346253
ATP10D	1530	0.696078	0.279739	0.024183	0.401878	0.0347418	0.0864486	0.388385	2.29032	0.0247823
ATP11A	1572	0.648219	0.339695	0.0120865	0.524043	0.0186457	0.0355805	0.514451	1.84268	0.0122344
ATP11B	1185	0.661603	0.31308	0.0253165	0.473214	0.0382653	0.0808625	0.455774	1.95511	0.025974
ATP11C	716	0.663408	0.311453	0.0251397	0.469474	0.0378947	0.0807175	0.452333	1.97095	0.025788
ATP12A	1191	0.665827	0.316541	0.0176322	0.47541	0.0264817	0.0557029	0.463145	1.99246	0.0179487
ATP13A1	1574	0.611182	0.378653	0.0101652	0.619543	0.016632	0.0268456	0.609407	1.5719	0.0102696
ATP13A2	1726	0.636732	0.340672	0.0225956	0.535032	0.0354868	0.0663265	0.516696	1.75279	0.023118
ATP13A3	1067	0.669166	0.322399	0.00843486	0.481793	0.012605	0.0261628	0.475795	2.02266	0.00850662
ATP13A4	1316	0.699088	0.276596	0.0243161	0.395652	0.0347826	0.0879121	0.382353	2.32323	0.0249221
ATP13A5	1630	0.695092	0.269325	0.0355828	0.387467	0.0511915	0.132118	0.368598	2.27968	0.0368957
ATP1A1	731	0.421341	0.571819	0.00683995	1.35714	0.0162338	0.0119617	1.33546	0.728132	0.00688705
ATP1A2	915	0.546448	0.437158	0.0163934	0.8	0.03	0.0375	0.776699	1.20482	0.0166667
ATP1A3	892	0.51009	0.484305	0.00560538	0.949451	0.010989	0.0115741	0.93913	1.04119	0.00563698
ATP1A4	1272	0.66195	0.310535	0.0275157	0.469121	0.0415677	0.0886076	0.450399	1.95814	0.0282943
ATP1B4	338	0.680473	0.295858	0.0236686	0.434783	0.0347826	0.08	0.420168	2.12963	0.0242424
ATP2A1	1259	0.594122	0.380461	0.025417	0.640374	0.0427807	0.0668058	0.614103	1.4638	0.0260799
ATP2A2	951	0.452156	0.537329	0.0105152	1.18837	0.0232558	0.0195695	1.16136	0.825336	0.010627
ATP2A3	1591	0.598366	0.384035	0.017599	0.641807	0.0294118	0.0458265	0.623469	1.48983	0.0179143
ATP2B1	803	0.606476	0.388543	0.00498132	0.640657	0.00821355	0.0128205	0.635438	1.54114	0.00500626
ATP2B2	1292	0.5387	0.45743	0.00386997	0.849138	0.00718391	0.00846024	0.843081	1.16779	0.003885
ATP2B3	1189	0.611438	0.380151	0.00841043	0.621733	0.0137552	0.0221239	0.613297	1.57359	0.00848176
ATP2B4	1273	0.656716	0.329929	0.0133543	0.502392	0.0203349	0.0404762	0.49238	1.91304	0.013535
ATP2C1	804	0.639303	0.344527	0.0161692	0.538911	0.0252918	0.0469314	0.525617	1.77241	0.0164349
ATP2C2	2163	0.672677	0.299122	0.0282016	0.444674	0.0419244	0.0942813	0.426781	2.05508	0.02902
ATP4A	1193	0.614417	0.367142	0.0184409	0.597544	0.0300136	0.0502283	0.580132	1.59348	0.0187874
ATP6AP1	510	0.635294	0.358824	0.00588235	0.564815	0.00925926	0.0163934	0.559633	1.74194	0.00591716
ATP6V0A1	734	0.607629	0.384196	0.00817439	0.632287	0.0134529	0.0212766	0.623894	1.54861	0.00824176
ATP6V0A2	976	0.661885	0.314549	0.0235656	0.475232	0.0356037	0.0749186	0.458894	1.95758	0.0241343
ATP6V0A4	1200	0.6625	0.313333	0.0241667	0.472956	0.036478	0.0771277	0.456311	1.96296	0.0247652
ATP6V0D2	444	0.707207	0.265766	0.027027	0.375796	0.0382166	0.101695	0.361963	2.41538	0.0277778
ATP6V1A	467	0.62955	0.357602	0.012848	0.568027	0.0204082	0.0359281	0.556667	1.69942	0.0130152
ATP6V1B1	739	0.665765	0.294993	0.0392422	0.443089	0.0589431	0.133028	0.418426	1.9919	0.0408451
ATP6V1B2	492	0.589431	0.396341	0.0142276	0.672414	0.0241379	0.0358974	0.656566	1.43564	0.014433
ATP6V1C2	682	0.658358	0.318182	0.0234604	0.483296	0.0356347	0.0737327	0.466667	1.92704	0.024024
ATP6V1H	473	0.693446	0.272727	0.0338266	0.393293	0.0487805	0.124031	0.375	2.26207	0.0350109
ATP7A	1265	0.717787	0.242688	0.0395257	0.338106	0.0550661	0.162866	0.320459	2.54342	0.0411523
ATP7B	2090	0.700957	0.266986	0.0320574	0.380887	0.0457338	0.120072	0.36423	2.344	0.0331191
ATP8A1	1061	0.63148	0.351555	0.0169651	0.556716	0.0268657	0.0482574	0.542151	1.71355	0.0172579
ATP8A2	1284	0.649533	0.32243	0.0280374	0.496403	0.0431655	0.0869565	0.475862	1.85333	0.0288462
ATP8B1	1332	0.663664	0.311562	0.0247748	0.469457	0.0373303	0.0795181	0.452563	1.97321	0.0254042
ATP8B2	1234	0.641815	0.341167	0.0170178	0.531566	0.0265152	0.0498812	0.517835	1.79186	0.0173124
ATP8B3	1983	0.665658	0.308623	0.0257186	0.463636	0.0386364	0.0833333	0.446389	1.99095	0.0263975
ATP8B4	1396	0.698424	0.260029	0.0415473	0.372308	0.0594872	0.15978	0.351404	2.31591	0.0433483
ATP9A	1042	0.549904	0.434741	0.0153551	0.790576	0.0279232	0.0353201	0.7691	1.22175	0.0155945
ATP9B	1969	0.664297	0.31031	0.0253936	0.467125	0.0382263	0.0818331	0.449926	1.97882	0.0260552
ATR	2210	0.644796	0.331222	0.0239819	0.513684	0.037193	0.0724044	0.495264	1.81529	0.0245712
ATRIP	2210	0.661538	0.328054	0.0104072	0.495896	0.0157319	0.0317241	0.488215	1.95455	0.0105167
ATRN	1402	0.655492	0.332382	0.0121255	0.507073	0.0184984	0.0364807	0.497863	1.90269	0.0122744
ATRNL1	1443	0.677755	0.299376	0.022869	0.441718	0.0337423	0.0763889	0.4273	2.10323	0.0234043
ATRX	1609	0.666252	0.321939	0.0118086	0.483209	0.0177239	0.0366795	0.474794	1.99628	0.0119497
ATXN1	1277	0.602193	0.376664	0.0211433	0.625488	0.0351105	0.0561331	0.604271	1.51378	0.0216
ATXN2	1158	0.663212	0.322107	0.0146805	0.485677	0.0221354	0.0455764	0.475159	1.96923	0.0148992
ATXN2L	1436	0.616295	0.377437	0.00626741	0.612429	0.0101695	0.0166052	0.606264	1.60617	0.00630694
ATXN7	1286	0.693624	0.300933	0.00544323	0.433857	0.00784753	0.0180879	0.430478	2.26396	0.00547303
ATXN7L1	1265	0.667984	0.320949	0.0110672	0.480473	0.016568	0.0344828	0.472643	2.0119	0.011191
ATXN7L2	995	0.662312	0.331658	0.00603015	0.500759	0.0091047	0.0181818	0.496241	1.96131	0.00606673
AURKA	401	0.63591	0.349127	0.0149626	0.54902	0.0235294	0.0428571	0.536398	1.74658	0.0151899
AURKB	470	0.665957	0.314894	0.0191489	0.472843	0.028754	0.0608108	0.459627	1.99363	0.0195228
AURKC	336	0.672619	0.297619	0.0297619	0.442478	0.0442478	0.1	0.423729	2.05455	0.0306748
AUTS2	1624	0.64101	0.351601	0.00738916	0.548511	0.0115274	0.0210158	0.54226	1.78559	0.00744417
AVIL	1212	0.694719	0.275578	0.029703	0.396675	0.0427553	0.107784	0.38041	2.27568	0.0306122
AVPR1A	581	0.672978	0.302926	0.0240964	0.450128	0.0358056	0.0795455	0.434568	2.05789	0.0246914
AVPR1B	593	0.684654	0.291737	0.0236088	0.426108	0.0344828	0.0809249	0.411905	2.17112	0.0241796
AXDND1	1401	0.684511	0.282655	0.0328337	0.41293	0.0479666	0.116162	0.39403	2.16968	0.0339483
AXIN1	1330	0.616541	0.366165	0.0172932	0.593902	0.0280488	0.0472279	0.577699	1.60784	0.0175976
AXIN2	1561	0.659833	0.331198	0.00896861	0.501942	0.0135922	0.0270793	0.495211	1.93974	0.00904977
AXL	1058	0.664461	0.323251	0.0122873	0.486486	0.0184922	0.0380117	0.477654	1.98028	0.0124402
AZGP1	406	0.70197	0.275862	0.0221675	0.392982	0.0315789	0.0803571	0.380952	2.35537	0.02267
B2M	152	0.697368	0.302632	0	0.433962	0	0	0.433962	2.30435	0
B3GALT1	289	0.626298	0.356401	0.017301	0.569061	0.0276243	0.0485437	0.553763	1.67593	0.0176056
B3GAT1	446	0.576233	0.408072	0.0156951	0.708171	0.0272374	0.0384615	0.689394	1.35979	0.0159453
B3GAT2	1091	0.693859	0.286893	0.0192484	0.413474	0.0277411	0.0670927	0.402314	2.26647	0.0196262
B3GNT3	451	0.643016	0.343681	0.0133038	0.534483	0.0206897	0.0387097	0.523649	1.80124	0.0134831
B3GNT7	518	0.640927	0.34556	0.0135135	0.539157	0.0210843	0.0391061	0.528024	1.78495	0.0136986
B3GNT9	669	0.61136	0.364723	0.0239163	0.596577	0.0391198	0.0655738	0.574118	1.57308	0.0245023
B3GNTL1	781	0.605634	0.355954	0.0384123	0.587738	0.0634249	0.107914	0.552684	1.53571	0.0399467
B4GALNT1	1374	0.666667	0.308588	0.0247453	0.462882	0.0371179	0.0801887	0.446316	2	0.0253731
B4GALNT2	708	0.679379	0.29661	0.0240113	0.43659	0.035343	0.0809524	0.421687	2.11894	0.024602
B4GALNT3	1243	0.662108	0.314562	0.0233307	0.475091	0.0352369	0.0741688	0.45892	1.95952	0.023888
B4GALNT4	1511	0.599603	0.382528	0.017869	0.637969	0.0298013	0.0467128	0.619507	1.49752	0.0181941
B4GALT5	350	0.605714	0.388571	0.00571429	0.641509	0.00943396	0.0147059	0.635514	1.53623	0.00574713
BAAT	480	0.702083	0.266667	0.03125	0.379822	0.0445104	0.117188	0.363636	2.35664	0.0322581
BACE1	579	0.671848	0.319516	0.00863558	0.475578	0.0128535	0.027027	0.469543	2.04737	0.0087108
BACE2	540	0.635185	0.355556	0.00925926	0.559767	0.0145773	0.0260417	0.551724	1.74112	0.00934579
BACH1	717	0.700139	0.287308	0.0125523	0.410359	0.0179283	0.0436893	0.403131	2.33488	0.0127119
BACH2	891	0.616162	0.37486	0.00897868	0.608379	0.0145719	0.0239521	0.599641	1.60526	0.00906002
BAG3	862	0.692575	0.278422	0.0290023	0.40201	0.041876	0.104167	0.385852	2.25283	0.0298686
BAG6	2169	0.661134	0.326418	0.0124481	0.493724	0.0188285	0.0381356	0.4846	1.95102	0.012605
BAHCC1	4107	0.653762	0.342342	0.00389579	0.52365	0.00595903	0.0113798	0.520548	1.88819	0.00391102
BAHD1	972	0.671811	0.319959	0.00823045	0.476263	0.0122511	0.0257235	0.470499	2.04702	0.00829876
BAIAP2	990	0.569697	0.416162	0.0141414	0.730496	0.0248227	0.0339806	0.712803	1.32394	0.0143443
BAIAP2L1	1346	0.682764	0.30312	0.0141159	0.443961	0.0206746	0.0465686	0.434968	2.15222	0.014318
BAIAP3	2088	0.659004	0.314655	0.026341	0.477471	0.0399709	0.0837139	0.459119	1.93258	0.0270536
BANK1	879	0.711035	0.254835	0.0341297	0.3584	0.048	0.133929	0.341985	2.46063	0.0353357
BANP	726	0.563361	0.42562	0.0110193	0.755501	0.0195599	0.02589	0.741007	1.29022	0.0111421
BAP1	1126	0.616341	0.357016	0.026643	0.579251	0.0432277	0.0746269	0.555249	1.60648	0.0273723
BARD1	1897	0.691618	0.268318	0.0400633	0.387957	0.0579268	0.149312	0.366715	2.24274	0.0417353
BARHL1	415	0.624096	0.368675	0.00722892	0.590734	0.011583	0.0196078	0.583969	1.66026	0.00728155
BARHL2	510	0.658824	0.331373	0.00980392	0.502976	0.014881	0.0295858	0.495601	1.93103	0.00990099
BASP1	369	0.674797	0.322493	0.00271003	0.477912	0.00401606	0.00840336	0.476	2.075	0.00271739
BAZ1A	1311	0.670481	0.309687	0.0198322	0.461889	0.0295791	0.0640394	0.448619	2.03472	0.0202335
BAZ1B	1259	0.631454	0.359015	0.00953137	0.568553	0.0150943	0.0265487	0.560099	1.71336	0.0096231
BAZ2A	1982	0.692735	0.298184	0.00908174	0.430444	0.01311	0.0304569	0.424874	2.25452	0.00916497
BAZ2B	2203	0.703132	0.28325	0.0136178	0.402841	0.0193673	0.0480769	0.395187	2.3685	0.0138058
BBS1	1339	0.687827	0.29649	0.0156833	0.431053	0.0228013	0.0528967	0.421444	2.20335	0.0159332
BBS10	821	0.712546	0.239951	0.047503	0.336752	0.0666667	0.19797	0.315705	2.47881	0.0498721
BBS12	763	0.685452	0.283093	0.0314548	0.413002	0.0458891	0.111111	0.394881	2.17917	0.0324763
BBS2	1216	0.663651	0.294408	0.0419408	0.443618	0.063197	0.142458	0.417249	1.97311	0.0437768
BBS7	678	0.718289	0.262537	0.019174	0.365503	0.026694	0.0730337	0.356	2.54974	0.0195489
BBS9	1028	0.678988	0.285019	0.0359922	0.419771	0.0530086	0.12628	0.398639	2.11515	0.037336
BBX	1098	0.65847	0.322404	0.0191257	0.489627	0.0290456	0.059322	0.475806	1.928	0.0194986
BCAM	949	0.653319	0.324552	0.0221286	0.496774	0.033871	0.0681818	0.480499	1.8845	0.0226293
BCAN	1218	0.669951	0.304598	0.0254516	0.454657	0.0379902	0.083558	0.438017	2.02985	0.0261163
BCAR1	1584	0.645202	0.347222	0.00757576	0.53816	0.0117417	0.0218182	0.531915	1.81851	0.00763359
BCAR3	1182	0.699662	0.290186	0.0101523	0.414752	0.0145103	0.0349854	0.40882	2.32958	0.0102564
BCAS1	743	0.716016	0.275908	0.00807537	0.385338	0.0112782	0.0292683	0.381041	2.52133	0.00814111
BCAS3	1114	0.671454	0.31149	0.0170557	0.463904	0.0254011	0.054755	0.452412	2.04372	0.0173516
BCAT1	527	0.70778	0.256167	0.0360531	0.36193	0.0509383	0.140741	0.344388	2.42208	0.0374016
BCAT2	499	0.633267	0.328657	0.0380762	0.518987	0.0601266	0.115854	0.489552	1.72678	0.0395833
BCHE	764	0.751309	0.197644	0.0510471	0.263066	0.0679443	0.258278	0.24633	3.02105	0.0537931
BCKDHA	846	0.654846	0.314421	0.0307329	0.480144	0.0469314	0.0977444	0.458621	1.89726	0.0317073
BCKDK	572	0.645105	0.332168	0.0227273	0.514905	0.0352304	0.0684211	0.497382	1.81773	0.0232558
BCL11A	972	0.582305	0.399177	0.0185185	0.685512	0.0318021	0.0463918	0.664384	1.39409	0.0188679
BCL11B	1140	0.516667	0.476316	0.00701754	0.921902	0.0135823	0.014733	0.909548	1.06897	0.00706714
BCL2	326	0.576687	0.41411	0.00920245	0.718085	0.0159574	0.0222222	0.706806	1.36232	0.00928793
BCL2L12	681	0.657856	0.320117	0.0220264	0.486607	0.0334821	0.0688073	0.470842	1.92275	0.0225225
BCL6	730	0.654795	0.336986	0.00821918	0.514644	0.0125523	0.0243902	0.508264	1.89683	0.00828729
BCL6B	624	0.644231	0.347756	0.00801282	0.539801	0.0124378	0.0230415	0.53317	1.81081	0.00807754
BCL9	1748	0.702517	0.293478	0.00400458	0.417752	0.00570033	0.0136452	0.415385	2.36154	0.00402068
BCL9L	2136	0.654963	0.338483	0.00655431	0.516798	0.0100071	0.0193638	0.511677	1.89824	0.00659755
BCLAF1	1988	0.694165	0.274648	0.0311871	0.395652	0.0449275	0.113553	0.378641	2.26974	0.0321911
BCO2	636	0.712264	0.245283	0.0424528	0.344371	0.0596026	0.173077	0.325	2.47541	0.044335
BCOR	1706	0.65592	0.33177	0.0123095	0.505809	0.0187668	0.0371025	0.496491	1.9063	0.0124629
BCORL1	1386	0.657287	0.335498	0.00721501	0.510428	0.0109769	0.0215054	0.504886	1.91789	0.00726744
BCR	2444	0.643208	0.349018	0.00777414	0.542621	0.0120865	0.0222743	0.536141	1.80275	0.00783505
BDKRB1	444	0.655405	0.317568	0.027027	0.484536	0.0412371	0.0851064	0.465347	1.90196	0.0277778
BDKRB2	510	0.641176	0.345098	0.0137255	0.538226	0.0214067	0.0397727	0.526946	1.78689	0.0139165
BDP1	2893	0.695126	0.280677	0.0241963	0.403779	0.0348086	0.0862069	0.390197	2.28005	0.0247963
BEGAIN	883	0.597961	0.394111	0.00792752	0.659091	0.0132576	0.0201149	0.650467	1.48732	0.00799087
BEND2	603	0.694859	0.293532	0.0116086	0.422434	0.0167064	0.039548	0.415493	2.27717	0.011745
BEND3	1019	0.614328	0.377821	0.00785083	0.615016	0.0127796	0.0207792	0.607256	1.59288	0.00791296
BEND4	604	0.662252	0.326159	0.0115894	0.4925	0.0175	0.035533	0.484029	1.96078	0.0117253
BEND5	853	0.621336	0.368113	0.010551	0.592453	0.0169811	0.0286624	0.58256	1.64087	0.0106635
BEST2	699	0.610873	0.359084	0.0300429	0.587822	0.0491803	0.0836653	0.560268	1.56985	0.0309735
BEST3	783	0.664112	0.292465	0.0434227	0.440385	0.0653846	0.148472	0.413357	1.97719	0.0453939
BFSP1	830	0.673494	0.296386	0.0301205	0.440072	0.0447227	0.101626	0.421233	2.06273	0.0310559
BFSP2	507	0.676529	0.291913	0.0315582	0.431487	0.0466472	0.108108	0.412256	2.09146	0.0325866
BGN	340	0.632353	0.358824	0.00882353	0.567442	0.0139535	0.0245902	0.559633	1.72	0.00890208
BHLHB9	337	0.74184	0.246291	0.0118694	0.332	0.016	0.0481928	0.326772	2.87356	0.012012
BHMT	523	0.617591	0.33652	0.0458891	0.544892	0.0743034	0.136364	0.507205	1.615	0.0480962
BICC1	1165	0.68412	0.303004	0.0128755	0.442911	0.0188206	0.0424929	0.434729	2.16576	0.0130435
BICD1	1043	0.650048	0.332694	0.0172579	0.511799	0.0265487	0.0518732	0.498563	1.85753	0.017561
BICD2	1068	0.622659	0.367978	0.0093633	0.590977	0.0150376	0.0254453	0.582222	1.65012	0.0094518
BIN1	743	0.604307	0.378197	0.0174966	0.625835	0.0289532	0.0462633	0.608225	1.52721	0.0178082
BIN2	605	0.671074	0.300826	0.0280992	0.448276	0.0418719	0.0934066	0.43026	2.0402	0.0289116
BIRC2	649	0.699538	0.288136	0.0123267	0.411894	0.0176211	0.0427807	0.404762	2.32821	0.0124805
BIRC3	642	0.693146	0.292835	0.0140187	0.422472	0.0202247	0.0478723	0.414097	2.25888	0.014218
BIRC6	4868	0.668652	0.32539	0.00595727	0.486636	0.00890937	0.0183081	0.482339	2.01798	0.00599297
BIVM	622	0.688103	0.286174	0.0257235	0.415888	0.0373832	0.0898876	0.400901	2.20619	0.0264026
BLK	1070	0.66729	0.302804	0.0299065	0.453782	0.0448179	0.0987654	0.434316	2.00562	0.0308285
BLM	1779	0.692524	0.274874	0.0326026	0.396916	0.0470779	0.118609	0.37907	2.25229	0.0337013
BLNK	612	0.660131	0.328431	0.0114379	0.497525	0.0173267	0.0348259	0.489051	1.94231	0.0115702
BMP1	1522	0.661629	0.32523	0.0131406	0.491559	0.019861	0.040404	0.481986	1.95534	0.0133156
BMP10	439	0.646925	0.341686	0.0113895	0.528169	0.0176056	0.0333333	0.519031	1.83226	0.0115207
BMP15	341	0.71261	0.255132	0.0322581	0.358025	0.0452675	0.126437	0.34252	2.47959	0.0333333
BMP2	458	0.622271	0.362445	0.0152838	0.582456	0.0245614	0.0421687	0.568493	1.6474	0.0155211
BMP2K	1760	0.721023	0.266477	0.0125	0.369582	0.0173365	0.0469083	0.363284	2.58452	0.0126582
BMP3	593	0.6914	0.291737	0.0168634	0.421951	0.0243902	0.0578035	0.411905	2.24044	0.0171527
BMP4	524	0.675573	0.30916	0.0152672	0.457627	0.0225989	0.0493827	0.447514	2.08235	0.0155039
BMP5	522	0.683908	0.289272	0.0268199	0.422969	0.0392157	0.0927152	0.407008	2.16364	0.0275591
BMP6	747	0.659973	0.334672	0.00535475	0.507099	0.00811359	0.016	0.503018	1.94094	0.00538358
BMP7	632	0.620253	0.365506	0.0142405	0.589286	0.0229592	0.038961	0.57606	1.63333	0.0144462
BMPER	841	0.687277	0.29132	0.0214031	0.423875	0.0311419	0.0734694	0.411074	2.19772	0.0218712
BMPR1A	835	0.664671	0.286228	0.0491018	0.430631	0.0738739	0.171548	0.401007	1.98214	0.0516373
BMPR1B	588	0.722789	0.268707	0.0085034	0.371765	0.0117647	0.0316456	0.367442	2.60736	0.00857633
BMPR2	1106	0.674503	0.24141	0.0840868	0.357909	0.124665	0.348315	0.318236	2.07222	0.0918065
BMS1	1489	0.691068	0.288113	0.0208193	0.41691	0.0301263	0.0722611	0.404717	2.23696	0.021262
BMX	898	0.683742	0.305122	0.0111359	0.446254	0.0162866	0.0364964	0.439103	2.16197	0.0112613
BNC1	1073	0.694315	0.299161	0.00652377	0.430872	0.00939597	0.0218069	0.426862	2.27134	0.0065666
BNC2	1332	0.674925	0.317568	0.00750751	0.470523	0.0111235	0.0236407	0.465347	2.07621	0.0075643
BOC	1399	0.651894	0.330951	0.0171551	0.507675	0.0263158	0.0518359	0.494658	1.87269	0.0174545
BPI	728	0.703297	0.277473	0.0192308	0.394531	0.0273438	0.0693069	0.38403	2.37037	0.0196078
BPIFB4	877	0.661345	0.310148	0.0285063	0.468966	0.0431034	0.0919118	0.449587	1.95286	0.0293427
BPTF	2728	0.66239	0.332845	0.0047654	0.50249	0.00719424	0.0143172	0.498901	1.962	0.00478821
BRAF	875	0.653714	0.331429	0.0148571	0.506993	0.0227273	0.0448276	0.495726	1.88779	0.0150812
BRAP	716	0.653631	0.326816	0.0195531	0.5	0.0299145	0.0598291	0.485477	1.8871	0.019943
BRAT1	1540	0.633117	0.341558	0.0253247	0.539487	0.04	0.0741445	0.518738	1.72566	0.0259827
BRCA1	4786	0.674049	0.229001	0.0969494	0.33974	0.143831	0.423358	0.297019	2.06795	0.107358
BRCA2	8491	0.683901	0.233306	0.0827935	0.34114	0.121061	0.354871	0.304301	2.16356	0.0902671
BRD	1	1	0	0	0	0		0		0
BRD1	1475	0.599322	0.391186	0.00949153	0.652715	0.0158371	0.0242634	0.642539	1.49577	0.00958248
BRD2	1116	0.63172	0.362007	0.0062724	0.57305	0.00992908	0.0173267	0.567416	1.71533	0.00631199
BRD3	854	0.567916	0.425059	0.00702576	0.748454	0.0123711	0.0165289	0.739308	1.31436	0.00707547
BRD4	1818	0.59626	0.40044	0.00330033	0.671587	0.00553506	0.00824176	0.66789	1.47684	0.00331126
BRD7	693	0.69697	0.291486	0.011544	0.418219	0.0165631	0.039604	0.411405	2.3	0.0116788
BRD8	1200	0.655833	0.324167	0.02	0.494282	0.0304956	0.0616967	0.479655	1.90557	0.0204082
BRD9	1310	0.631298	0.353435	0.0152672	0.559855	0.0241838	0.0431965	0.546635	1.71222	0.0155039
BRDT	968	0.709711	0.268595	0.0216942	0.378457	0.0305677	0.0807692	0.367232	2.44484	0.0221753
BRF1	2044	0.623777	0.358611	0.0176125	0.574902	0.0282353	0.0491132	0.559115	1.658	0.0179283
BRIP1	2344	0.694966	0.265358	0.0396758	0.381829	0.0570902	0.149518	0.361208	2.27832	0.041315
BRPF1	1209	0.607113	0.383788	0.00909843	0.632153	0.0149864	0.0237069	0.622819	1.54526	0.00918197
BRPF3	1213	0.647156	0.343776	0.00906843	0.53121	0.0140127	0.0263789	0.523869	1.83411	0.00915141
BRS3	247	0.659919	0.331984	0.00809717	0.503067	0.0122699	0.0243902	0.49697	1.94048	0.00816327
BRSK1	1216	0.569079	0.421053	0.00986842	0.739884	0.017341	0.0234375	0.727273	1.32061	0.00996678
BRSK2	1278	0.589202	0.403756	0.00704225	0.685259	0.0119522	0.0174419	0.677165	1.43429	0.0070922
BRWD1	2207	0.682374	0.301314	0.0163117	0.441567	0.0239044	0.0541353	0.431258	2.14836	0.0165822
BRWD3	1023	0.621701	0.365591	0.0127077	0.58805	0.0204403	0.0347594	0.576271	1.64341	0.0128713
BSG	698	0.588825	0.389685	0.02149	0.6618	0.0364964	0.0551471	0.638498	1.43206	0.0219619
BSN	4677	0.681634	0.312166	0.00620056	0.457967	0.00909661	0.019863	0.453839	2.14103	0.00623924
BSND	409	0.662592	0.308068	0.0293399	0.464945	0.0442804	0.0952381	0.44523	1.96377	0.0302267
BTAF1	1446	0.641079	0.352006	0.00691563	0.549083	0.0107875	0.0196464	0.543223	1.78613	0.00696379
BTBD11	1368	0.649854	0.340643	0.00950292	0.524184	0.0146232	0.027897	0.51663	1.85595	0.0095941
BTBD16	671	0.661699	0.315946	0.0223547	0.477477	0.0337838	0.0707547	0.461874	1.95595	0.0228659
BTBD17	653	0.603369	0.367534	0.0290965	0.609137	0.0482234	0.0791667	0.581114	1.52124	0.0299685
BTBD2	766	0.574413	0.421671	0.00391645	0.734091	0.00681818	0.00928793	0.72912	1.34969	0.00393185
BTBD3	511	0.630137	0.35225	0.0176125	0.559006	0.0279503	0.05	0.543807	1.7037	0.0179283
BTBD7	1295	0.682625	0.303475	0.0138996	0.44457	0.020362	0.0458015	0.435698	2.15085	0.0140955
BTBD9	612	0.640523	0.318627	0.0408497	0.497449	0.0637755	0.128205	0.467626	1.78182	0.0425894
BTK	510	0.564706	0.362745	0.072549	0.642361	0.128472	0.2	0.569231	1.2973	0.0782241
BTN1A1	549	0.684882	0.291439	0.0236794	0.425532	0.0345745	0.08125	0.411311	2.17341	0.0242537
BTN2A1	748	0.65508	0.300802	0.0441176	0.459184	0.0673469	0.146667	0.43021	1.89922	0.0461538
BTN2A2	672	0.677083	0.291667	0.03125	0.430769	0.0461538	0.107143	0.411765	2.09677	0.0322581
BTN3A1	594	0.708754	0.257576	0.03367	0.36342	0.0475059	0.130719	0.346939	2.43353	0.0348432
BTN3A3	732	0.668033	0.295082	0.0368852	0.441718	0.0552147	0.125	0.418605	2.01235	0.0382979
BTNL	10	1	0	0	0	0		0		0
BTNL3	514	0.675097	0.291829	0.0330739	0.432277	0.0489914	0.113333	0.412088	2.07784	0.0342052
BTNL8	678	0.687316	0.278761	0.0339233	0.405579	0.0493562	0.121693	0.386503	2.19811	0.0351145
BTNL9	920	0.657609	0.313043	0.0293478	0.476033	0.0446281	0.09375	0.455696	1.92063	0.0302352
BTRC	682	0.640762	0.331378	0.0278592	0.517162	0.0434783	0.0840708	0.495614	1.78367	0.0286576
BUB1	1033	0.703775	0.272023	0.0242014	0.38652	0.0343879	0.088968	0.37367	2.37582	0.0248016
BUB1B	1096	0.688869	0.284672	0.0264599	0.413245	0.0384106	0.0929487	0.397959	2.21408	0.027179
BUD13	773	0.723157	0.254851	0.0219922	0.352415	0.0304114	0.0862944	0.342014	2.61215	0.0224868
BVES	385	0.703896	0.27013	0.025974	0.383764	0.0369004	0.0961538	0.370107	2.37719	0.0266667
C	1	1	0	0	0	0		0		0
C10orf120	413	0.716707	0.239709	0.0435835	0.334459	0.0608108	0.181818	0.315287	2.52991	0.0455696
C10orf71	1741	0.689833	0.286043	0.0241241	0.414654	0.0349709	0.0843373	0.400644	2.22407	0.0247204
C10orf90	1072	0.699627	0.275187	0.0251866	0.393333	0.036	0.0915254	0.379665	2.32919	0.0258373
C11orf	3	1	0	0	0	0		0		0
C11orf80	1348	0.655786	0.327893	0.0163205	0.5	0.0248869	0.0497738	0.487859	1.90517	0.0165913
C12orf4	492	0.697154	0.264228	0.0386179	0.379009	0.0553936	0.146154	0.359116	2.30201	0.0401691
C12orf40	905	0.716022	0.246409	0.0375691	0.344136	0.0524691	0.152466	0.326979	2.5214	0.0390356
C12orf42	713	0.69986	0.27209	0.0280505	0.388778	0.0400802	0.103093	0.373796	2.33178	0.02886
C12orf5	1	1	0	0	0	0		0		0
C12orf50	540	0.705556	0.259259	0.0351852	0.367454	0.0498688	0.135714	0.35	2.39623	0.0364683
C12orf56	733	0.6603	0.294679	0.0450205	0.446281	0.0681818	0.152778	0.417795	1.94378	0.0471429
C14orf3	1	1	0	0	0	0		0		0
C14orf39	664	0.715361	0.260542	0.0240964	0.364211	0.0336842	0.0924855	0.352342	2.51323	0.0246914
C15orf3	2	1	0	0	0	0		0		0
C15orf39	1284	0.676791	0.314642	0.00856698	0.464902	0.0126582	0.0272277	0.459091	2.09398	0.00864101
C16orf	1	1	0	0	0	0		0		0
C16orf46	583	0.704974	0.267581	0.0274443	0.379562	0.0389294	0.102564	0.36534	2.38953	0.0282187
C16orf6	2	1	0	0	0	0		0		0
C16orf7	5	1	0	0	0	0		0		0
C16orf71	1120	0.699107	0.277679	0.0232143	0.39719	0.0332056	0.0836013	0.384425	2.32344	0.023766
C16orf78	349	0.722063	0.240688	0.0372493	0.333333	0.0515873	0.154762	0.316981	2.59794	0.0386905
C16orf89	771	0.652399	0.302205	0.0453956	0.463221	0.0695825	0.150215	0.433086	1.87687	0.0475543
C16orf96	1427	0.703574	0.267694	0.0287316	0.380478	0.0408367	0.10733	0.36555	2.37352	0.0295815
C17orf7	11	1	0	0	0	0		0		0
C17orf80	1062	0.630885	0.347458	0.0216573	0.550746	0.0343284	0.0623306	0.532468	1.70918	0.0221367
C17orf97	762	0.645669	0.333333	0.0209974	0.51626	0.0325203	0.0629921	0.5	1.82222	0.0214477
C19orf44	816	0.677696	0.291667	0.0306373	0.43038	0.045208	0.105042	0.411765	2.10266	0.0316056
C19orf57	1142	0.676883	0.301226	0.0218914	0.445019	0.0323415	0.0726744	0.431078	2.09485	0.0223814
C1orf	2	1	0	0	0	0		0		0
C1orf112	1388	0.70245	0.271614	0.0259366	0.386667	0.0369231	0.0954907	0.372898	2.36077	0.0266272
C1orf116	787	0.730623	0.25413	0.0152478	0.347826	0.0208696	0.06	0.340716	2.71226	0.0154839
C1orf12	2	1	0	0	0	0		0		0
C1orf127	1046	0.681644	0.283939	0.0344168	0.41655	0.0504909	0.121212	0.396529	2.14114	0.0356436
C1orf141	509	0.693517	0.277014	0.0294695	0.399433	0.0424929	0.106383	0.383152	2.26282	0.0303644
C1orf167	1488	0.656586	0.295027	0.0483871	0.449335	0.073695	0.164009	0.418494	1.91194	0.0508475
C1orf4	1	1	0	0	0	0		0		0
C1orf44	1	1	0	0	0	0		0		0
C1orf7	10	1	0	0	0	0		0		0
C1orf71	9	1	0	0	0	0		0		0
C1orf87	644	0.670807	0.287267	0.0419255	0.428241	0.0625	0.145946	0.40305	2.03774	0.0437601
C1orf94	752	0.680851	0.299202	0.0199468	0.439453	0.0292969	0.0666667	0.426945	2.13333	0.0203528
C1QTNF2	509	0.689587	0.294695	0.0157171	0.42735	0.022792	0.0533333	0.417827	2.22152	0.0159681
C1R	770	0.637662	0.335065	0.0272727	0.525458	0.0427699	0.0813953	0.503906	1.75986	0.0280374
C1RL	696	0.646552	0.316092	0.0373563	0.488889	0.0577778	0.118182	0.462185	1.82927	0.038806
C1S	709	0.671368	0.304654	0.0239774	0.453782	0.0357143	0.0787037	0.438134	2.04292	0.0245665
C2	1450	0.647586	0.331034	0.0213793	0.511182	0.0330138	0.0645833	0.494845	1.83757	0.0218464
C20orf194	1179	0.671756	0.303647	0.0245971	0.45202	0.0366162	0.0810056	0.436054	2.04651	0.0252174
C2CD2	889	0.614173	0.364454	0.0213723	0.593407	0.0347985	0.058642	0.573451	1.59184	0.0218391
C2CD2L	777	0.685972	0.307593	0.00643501	0.448405	0.00938086	0.0209205	0.444238	2.18443	0.00647668
C2CD3	2671	0.691127	0.287907	0.0209659	0.416576	0.0303359	0.0728218	0.404311	2.23758	0.0214149
C2orf14	3	1	0	0	0	0		0		0
C2orf16	1492	0.700402	0.266756	0.0328418	0.380861	0.04689	0.123116	0.363803	2.33781	0.033957
C2orf42	588	0.664966	0.307823	0.0272109	0.462916	0.0409207	0.0883978	0.444717	1.98477	0.027972
C2orf7	1	1	0	0	0	0		0		0
C2orf78	983	0.713123	0.25941	0.0274669	0.363766	0.0385164	0.105882	0.350275	2.48582	0.0282427
C3	1898	0.584299	0.403056	0.0126449	0.689811	0.0216411	0.0313725	0.675199	1.40558	0.0128068
C3AR1	562	0.701068	0.266904	0.0320285	0.380711	0.0456853	0.12	0.364078	2.34524	0.0330882
C3orf2	1	1	0	0	0	0		0		0
C3orf20	1187	0.695872	0.276327	0.0278012	0.397094	0.0399516	0.10061	0.381839	2.28809	0.0285962
C4BPA	586	0.646758	0.331058	0.0221843	0.511873	0.0343008	0.0670103	0.494898	1.83092	0.0226876
C4orf5	7	1	0	0	0	0		0		0
C4orf50	1746	0.679267	0.285223	0.0355097	0.419899	0.0522766	0.124498	0.399038	2.11786	0.0368171
C5	1686	0.687426	0.281732	0.0308422	0.409836	0.0448663	0.109474	0.392238	2.19924	0.0318237
C5AR1	501	0.640719	0.335329	0.0239521	0.523364	0.0373832	0.0714286	0.504505	1.78333	0.0245399
C5orf34	704	0.711648	0.247159	0.0411932	0.347305	0.0578842	0.166667	0.328302	2.46798	0.042963
C6	1245	0.677108	0.28755	0.0353414	0.424674	0.0521945	0.122905	0.403608	2.09701	0.0366361
C6orf11	3	1	0	0	0	0		0		0
C6orf118	722	0.66482	0.296399	0.0387812	0.445833	0.0583333	0.130841	0.42126	1.98347	0.0403458
C7	1077	0.696379	0.273909	0.0297122	0.393333	0.0426667	0.108475	0.377238	2.29358	0.030622
C7orf31	703	0.738265	0.230441	0.0312945	0.312139	0.0423892	0.135802	0.299445	2.82065	0.0323054
C8A	823	0.699878	0.262454	0.0376671	0.375	0.0538194	0.143519	0.355848	2.33198	0.0391414
C8B	810	0.676543	0.279012	0.0444444	0.412409	0.0656934	0.159292	0.386986	2.0916	0.0465116
C8orf34	597	0.696817	0.276382	0.0268007	0.396635	0.0384615	0.0969697	0.381944	2.29834	0.0275387
C9	727	0.70564	0.255846	0.0385144	0.362573	0.0545809	0.150538	0.343808	2.3972	0.0400572
C9orf131	1297	0.708558	0.262914	0.0285274	0.371055	0.0402612	0.108504	0.356695	2.43122	0.0293651
C9orf43	941	0.680128	0.292242	0.0276302	0.429688	0.040625	0.0945455	0.412913	2.12625	0.0284153
C9orf50	423	0.41844	0.527187	0.0543735	1.25989	0.129944	0.103139	1.115	0.719512	0.0575
CA	2	1	0	0	0	0		0		0
CA10	324	0.645062	0.33642	0.0185185	0.521531	0.0287081	0.0550459	0.506977	1.81739	0.0188679
CA4	459	0.651416	0.320261	0.0283224	0.491639	0.0434783	0.0884354	0.471154	1.86875	0.029148
CA8	323	0.628483	0.346749	0.0247678	0.551724	0.0394089	0.0714286	0.530806	1.69167	0.0253968
CA9	569	0.685413	0.293497	0.0210896	0.428205	0.0307692	0.0718563	0.415423	2.17877	0.021544
CABIN1	2543	0.660244	0.321667	0.0180889	0.487195	0.0273973	0.0562347	0.474203	1.94329	0.0184221
CABP4	562	0.640569	0.322064	0.0373665	0.502778	0.0583333	0.116022	0.475066	1.78218	0.038817
CABS1	484	0.725207	0.262397	0.0123967	0.361823	0.017094	0.0472441	0.355742	2.6391	0.0125523
CACHD1	1351	0.69356	0.290155	0.0162842	0.418356	0.0234792	0.0561224	0.408759	2.26329	0.0165538
CACNA1A	3077	0.610985	0.369841	0.0191745	0.605319	0.031383	0.0518453	0.5869	1.57059	0.0195494
CACNA1B	3067	0.552005	0.33942	0.108575	0.614885	0.196692	0.319885	0.51382	1.23217	0.1218
CACNA1C	2875	0.507478	0.369739	0.122783	0.728581	0.241947	0.332079	0.586645	1.03037	0.139968
CACNA1D	2019	0.618623	0.370976	0.0104012	0.59968	0.0168135	0.0280374	0.589764	1.62208	0.0105105
CACNA1E	2226	0.607367	0.384996	0.00763702	0.633876	0.012574	0.0198366	0.626004	1.54691	0.00769579
CACNA1F	1602	0.661673	0.318976	0.0193508	0.482075	0.0292453	0.0606654	0.468378	1.95572	0.0197327
CACNA1G	2613	0.610409	0.382702	0.00688863	0.626959	0.0112853	0.018	0.619963	1.5668	0.00693642
CACNA1H	6040	0.596192	0.35894	0.0448675	0.602055	0.0752569	0.125	0.559917	1.47642	0.0469752
CACNA1I	2557	0.58858	0.400469	0.0109503	0.680399	0.0186047	0.0273438	0.667971	1.43061	0.0110716
CACNA1S	2578	0.645849	0.292863	0.0612878	0.453453	0.0948949	0.209272	0.414152	1.82366	0.0652893
CACNA2D1	1239	0.51251	0.273608	0.213882	0.533858	0.417323	0.781711	0.376667	1.05132	0.272074
CACNA2D2	1996	0.566633	0.341182	0.0921844	0.602122	0.162688	0.270191	0.517871	1.30751	0.101545
CACNA2D3	1360	0.535294	0.288971	0.175735	0.539835	0.328297	0.608142	0.406412	1.1519	0.213202
CACNA2D4	1767	0.593662	0.27957	0.126769	0.470925	0.213537	0.453441	0.38806	1.461	0.145172
CACNB1	755	0.654305	0.33245	0.013245	0.508097	0.0202429	0.0398406	0.498016	1.89272	0.0134228
CACNB2	1616	0.597153	0.316832	0.0860149	0.53057	0.144041	0.271484	0.463768	1.48233	0.0941097
CACNB3	497	0.635815	0.344064	0.0201207	0.541139	0.0316456	0.0584795	0.52454	1.74586	0.0205339
CACNB4	591	0.514382	0.28088	0.204738	0.546053	0.398026	0.728916	0.390588	1.05923	0.257447
CACNG2	327	0.623853	0.373089	0.0030581	0.598039	0.00490196	0.00819672	0.595122	1.65854	0.00306748
CACNG3	300	0.526667	0.473333	0	0.898734	0	0	0.898734	1.11268	0
CACNG4	365	0.589041	0.394521	0.0164384	0.669767	0.027907	0.0416667	0.651584	1.43333	0.0167131
CACNG5	359	0.665738	0.317549	0.0167131	0.476987	0.0251046	0.0526316	0.465306	1.99167	0.0169972
CACNG7	435	0.636782	0.356322	0.00689655	0.559567	0.0108303	0.0193548	0.553571	1.75316	0.00694444
CACNG8	453	0.516556	0.479029	0.00441501	0.92735	0.00854701	0.00921659	0.919492	1.06849	0.00443459
CAD	2588	0.647991	0.34119	0.0108192	0.526535	0.0166965	0.0317101	0.517889	1.84083	0.0109375
CADM1	527	0.607211	0.388994	0.00379507	0.640625	0.00625	0.0097561	0.636646	1.54589	0.00380952
CADM2	443	0.598194	0.392777	0.00902935	0.656604	0.0150943	0.0229885	0.64684	1.48876	0.00911162
CADM3	493	0.614604	0.371197	0.0141988	0.60396	0.0231023	0.0382514	0.590323	1.59474	0.0144033
CADPS	1466	0.610505	0.373124	0.0163711	0.611173	0.0268156	0.0438757	0.595212	1.56743	0.0166436
CADPS2	1345	0.675836	0.304833	0.0193309	0.451045	0.0286029	0.0634146	0.438503	2.08486	0.0197119
CAGE1	903	0.676633	0.292359	0.0310078	0.432079	0.0458265	0.106061	0.413146	2.09247	0.032
CALB2	342	0.652047	0.324561	0.0233918	0.497758	0.0358744	0.0720721	0.480519	1.87395	0.0239521
CALCOCO1	750	0.665333	0.312	0.0226667	0.468938	0.0340681	0.0726496	0.453488	1.98805	0.0231924
CALCR	606	0.693069	0.277228	0.029703	0.4	0.0428571	0.107143	0.383562	2.25806	0.0306122
CALCRL	387	0.671835	0.315245	0.0129199	0.469231	0.0192308	0.0409836	0.460377	2.04724	0.013089
CALD1	855	0.730994	0.259649	0.00935673	0.3552	0.0128	0.036036	0.350711	2.71739	0.0094451
CALN1	345	0.617391	0.356522	0.026087	0.577465	0.0422535	0.0731707	0.554054	1.61364	0.0267857
CALR	560	0.6	0.392857	0.00714286	0.654762	0.0119048	0.0181818	0.647059	1.5	0.00719424
CALR3	556	0.67446	0.289568	0.0359712	0.429333	0.0533333	0.124224	0.407595	2.07182	0.0373134
CAMK1D	394	0.548223	0.431472	0.0203046	0.787037	0.037037	0.0470588	0.758929	1.21348	0.0207254
CAMK1G	515	0.6	0.378641	0.0213592	0.631068	0.0355987	0.0564103	0.609375	1.5	0.0218254
CAMK2A	335	0.453731	0.528358	0.0179104	1.16447	0.0394737	0.0338983	1.12025	0.830601	0.0182371
CAMK2B	727	0.535076	0.448418	0.0165062	0.838046	0.0308483	0.0368098	0.812968	1.15089	0.0167832
CAMK2G	631	0.59271	0.391442	0.0158479	0.660428	0.026738	0.0404858	0.643229	1.45525	0.0161031
CAMK4	470	0.634043	0.342553	0.0234043	0.540268	0.0369128	0.068323	0.521036	1.73256	0.0239651
CAMKK1	703	0.654339	0.337127	0.00853485	0.515217	0.0130435	0.0253165	0.508584	1.893	0.00860832
CAMKK2	775	0.634839	0.348387	0.0167742	0.54878	0.0264228	0.0481481	0.534653	1.73852	0.0170604
CAMKV	435	0.551724	0.445977	0.00229885	0.808333	0.00416667	0.00515464	0.804979	1.23077	0.00230415
CAMSAP1	1898	0.641201	0.348788	0.0100105	0.543961	0.0156122	0.0287009	0.535599	1.78708	0.0101118
CAMSAP2	1198	0.708681	0.283806	0.00751252	0.400471	0.0106007	0.0264706	0.39627	2.43266	0.00756939
CAMSAP3	1601	0.61649	0.377264	0.0062461	0.611955	0.0101317	0.0165563	0.605817	1.60749	0.00628536
CAMTA1	1902	0.650368	0.337014	0.0126183	0.518189	0.0194018	0.0374415	0.508327	1.86015	0.0127796
CAMTA2	2227	0.664122	0.322856	0.013022	0.486139	0.0196078	0.0403338	0.47679	1.97727	0.0131938
CAN	2	1	0	0	0	0		0		0
CAND1	910	0.6	0.393407	0.00659341	0.655678	0.010989	0.0167598	0.648551	1.5	0.00663717
CAND2	1700	0.644706	0.337647	0.0176471	0.523723	0.0273723	0.0522648	0.509769	1.81457	0.0179641
CANT1	570	0.652632	0.321053	0.0263158	0.491935	0.0403226	0.0819672	0.472868	1.87879	0.027027
CANX	1033	0.658277	0.31849	0.0232333	0.483824	0.0352941	0.0729483	0.46733	1.92635	0.0237859
CAP2	491	0.684318	0.299389	0.0162933	0.4375	0.0238095	0.0544218	0.427326	2.16774	0.0165631
CAPN	5	1	0	0	0	0		0		0
CAPN1	865	0.672832	0.307514	0.0196532	0.457045	0.0292096	0.0639098	0.444073	2.05654	0.0200472
CAPN10	962	0.619543	0.35447	0.0259875	0.572148	0.0419463	0.0733138	0.549114	1.62842	0.0266809
CAPN11	915	0.68306	0.279781	0.0371585	0.4096	0.0544	0.132812	0.388467	2.15517	0.0385925
CAPN12	1271	0.644375	0.314713	0.0409127	0.4884	0.0634921	0.13	0.459242	1.81195	0.0426579
CAPN13	884	0.687783	0.281674	0.030543	0.409539	0.0444079	0.108434	0.392126	2.2029	0.0315053
CAPN14	785	0.68535	0.286624	0.0280255	0.418216	0.0408922	0.0977778	0.401786	2.17814	0.0288336
CAPN2	921	0.653637	0.304017	0.0423453	0.465116	0.0647841	0.139286	0.436817	1.88715	0.0442177
CAPN3	1105	0.677828	0.284163	0.038009	0.419226	0.0560748	0.133758	0.396966	2.10393	0.0395108
CAPN5	1109	0.665464	0.305681	0.0288548	0.45935	0.0433604	0.0943953	0.44026	1.98922	0.0297122
CAPN6	447	0.637584	0.346756	0.01566	0.54386	0.0245614	0.0451613	0.530822	1.75926	0.0159091
CAPN7	850	0.669412	0.296471	0.0341176	0.442882	0.0509666	0.115079	0.421405	2.02491	0.0353228
CAPN9	884	0.692308	0.273756	0.0339367	0.395425	0.0490196	0.123967	0.376947	2.25	0.0351288
CAPRIN1	698	0.673352	0.310888	0.0157593	0.461702	0.0234043	0.0506912	0.451143	2.0614	0.0160116
CAPRIN2	1191	0.676742	0.298069	0.0251889	0.440447	0.0372208	0.084507	0.424641	2.09351	0.0258398
CAPS2	1363	0.696992	0.265591	0.0374175	0.381053	0.0536842	0.140884	0.361638	2.30024	0.038872
CAPSL	309	0.705502	0.268608	0.02589	0.380734	0.0366972	0.0963855	0.367257	2.3956	0.0265781
CARD	7	1	0	0	0	0		0		0
CARD1	3	1	0	0	0	0		0		0
CARD10	1303	0.633922	0.350729	0.0153492	0.553269	0.0242131	0.0437637	0.540189	1.73166	0.0155885
CARD11	1335	0.572285	0.420974	0.00674157	0.735602	0.0117801	0.0160142	0.727038	1.338	0.00678733
CARD14	2166	0.644044	0.336565	0.0193906	0.522581	0.0301075	0.0576132	0.507307	1.80934	0.019774
CARD6	1118	0.729875	0.229875	0.0402504	0.314951	0.0551471	0.175097	0.29849	2.70199	0.0419385
CARD8	697	0.654232	0.321377	0.0243902	0.491228	0.0372807	0.0758929	0.473573	1.89212	0.025
CARD9	1349	0.644181	0.337287	0.0185322	0.52359	0.0287687	0.0549451	0.508949	1.81042	0.0188822
CARM1	772	0.566062	0.428756	0.00518135	0.757437	0.00915332	0.0120846	0.750567	1.30448	0.00520833
CARNS1	1267	0.656669	0.322021	0.0213102	0.490385	0.0324519	0.0661765	0.474971	1.91264	0.0217742
CARS2	929	0.653391	0.317546	0.0290635	0.485997	0.0444811	0.0915254	0.4653	1.88509	0.0299335
CASC1	748	0.661765	0.300802	0.0374332	0.454545	0.0565657	0.124444	0.43021	1.95652	0.0388889
CASC3	759	0.69697	0.29249	0.0105402	0.41966	0.0151229	0.036036	0.413408	2.3	0.0106525
CASD1	734	0.681199	0.30109	0.0177112	0.442	0.026	0.0588235	0.430799	2.13675	0.0180305
CASK	1144	0.603147	0.361888	0.034965	0.6	0.057971	0.0966184	0.567123	1.51982	0.0362319
CASKIN1	2094	0.617479	0.377268	0.0052531	0.610982	0.00850735	0.0139241	0.605828	1.61423	0.00528084
CASKIN2	2070	0.671981	0.321739	0.00628019	0.478792	0.00934579	0.0195195	0.474359	2.0486	0.00631988
CASP	3	1	0	0	0	0		0		0
CASP2	854	0.700234	0.290398	0.00936768	0.414716	0.0133779	0.0322581	0.409241	2.33594	0.00945626
CASP5	593	0.696459	0.278246	0.0252951	0.399516	0.0363196	0.0909091	0.385514	2.29444	0.0259516
CASP8	590	0.671186	0.298305	0.0305085	0.444444	0.0454545	0.102273	0.425121	2.04124	0.0314685
CASP8AP2	1925	0.713247	0.281039	0.00571429	0.394028	0.00801165	0.0203327	0.390896	2.48732	0.00574713
CASQ1	468	0.685897	0.275641	0.0384615	0.401869	0.0560748	0.139535	0.380531	2.18367	0.04
CASQ2	497	0.684105	0.291751	0.0241449	0.426471	0.0352941	0.0827586	0.411932	2.16561	0.0247423
CASR	1380	0.628986	0.353623	0.0173913	0.562212	0.0276498	0.0491803	0.547085	1.69531	0.0176991
CASS4	908	0.661894	0.329295	0.00881057	0.497504	0.0133111	0.0267559	0.490969	1.95765	0.00888889
CAST	974	0.714579	0.270021	0.0154004	0.377874	0.0215517	0.0570342	0.369902	2.5036	0.0156413
CASZ1	2430	0.630041	0.366667	0.00329218	0.581973	0.00522534	0.00897868	0.578947	1.703	0.00330306
CATSPER1	954	0.674004	0.29979	0.0262055	0.44479	0.0388802	0.0874126	0.428144	2.06752	0.0269107
CATSPER2	671	0.692996	0.275708	0.0312966	0.397849	0.0451613	0.113514	0.380658	2.25728	0.0323077
CATSPER3	461	0.698482	0.284165	0.0173536	0.406832	0.0248447	0.0610687	0.39697	2.31655	0.01766
CATSPER4	654	0.665138	0.298165	0.0366972	0.448276	0.0551724	0.123077	0.424837	1.9863	0.0380952
CATSPERB	1071	0.704015	0.266106	0.0298786	0.377984	0.0424403	0.112281	0.362595	2.37855	0.0307988
CATSPERG	1352	0.650148	0.318787	0.0310651	0.49033	0.0477816	0.0974478	0.46797	1.85835	0.0320611
CB	11	1	0	0	0	0		0		0
CB2	6	1	0	0	0	0		0		0
CB4	1	1	0	0	0	0		0		0
CBFA2T2	668	0.628743	0.359281	0.011976	0.571429	0.0190476	0.0333333	0.560748	1.69355	0.0121212
CBFA2T3	2150	0.678605	0.311628	0.00976744	0.459219	0.0143934	0.0313433	0.452703	2.11143	0.00986379
CBFB	193	0.57513	0.404145	0.0207254	0.702703	0.036036	0.0512821	0.678261	1.35366	0.021164
CBL	1037	0.671167	0.309547	0.0192864	0.461207	0.0287356	0.0623053	0.448324	2.04106	0.0196657
CBLB	1047	0.667622	0.322827	0.0095511	0.483548	0.0143062	0.0295858	0.476728	2.00862	0.0096432
CBLC	700	0.651429	0.32	0.0285714	0.491228	0.0438596	0.0892857	0.470588	1.86885	0.0294118
CBLL1	563	0.657194	0.335702	0.0071048	0.510811	0.0108108	0.021164	0.505348	1.9171	0.00715564
CBLN2	248	0.548387	0.431452	0.0201613	0.786765	0.0367647	0.046729	0.758865	1.21429	0.0205761
CBLN4	210	0.57619	0.404762	0.0190476	0.702479	0.0330579	0.0470588	0.68	1.35955	0.0194175
CBS	894	0.631991	0.344519	0.0234899	0.545133	0.0371681	0.0681818	0.525597	1.71733	0.024055
CBX2	1106	0.647378	0.342676	0.00994575	0.52933	0.0153631	0.0290237	0.52132	1.8359	0.0100457
CBX4	728	0.627747	0.366758	0.00549451	0.584245	0.00875274	0.0149813	0.579176	1.68635	0.00552486
CBX6	548	0.607664	0.390511	0.00182482	0.642643	0.003003	0.0046729	0.640719	1.54884	0.00182815
CBX8	518	0.598456	0.393822	0.00772201	0.658065	0.0129032	0.0196078	0.649682	1.49038	0.0077821
CC2D1A	1294	0.66847	0.319938	0.011592	0.478613	0.017341	0.0362319	0.470455	2.01632	0.0117279
CC2D1B	1156	0.698962	0.279412	0.0216263	0.399752	0.0309406	0.0773994	0.387755	2.32184	0.0221043
CC2D2A	1893	0.692552	0.269942	0.0375066	0.389779	0.0541571	0.138943	0.369754	2.25258	0.0389682
CCAR1	893	0.648376	0.328108	0.0235162	0.506045	0.0362694	0.0716724	0.488333	1.84395	0.0240826
CCBE1	710	0.643662	0.322535	0.0338028	0.501094	0.0525164	0.104803	0.476091	1.80632	0.0349854
CCDC	8	1	0	0	0	0		0		0
CCDC1	14	1	0	0	0	0		0		0
CCDC102A	1009	0.675917	0.311199	0.012884	0.460411	0.0190616	0.0414013	0.451799	2.08563	0.0130522
CCDC102B	686	0.727405	0.231778	0.0408163	0.318637	0.0561122	0.176101	0.301708	2.66845	0.0425532
CCDC105	1031	0.680892	0.302619	0.0164888	0.444444	0.0242165	0.0544872	0.433936	2.13374	0.0167653
CCDC11	8	1	0	0	0	0		0		0
CCDC110	909	0.716172	0.235424	0.0484048	0.328725	0.0675883	0.205607	0.307914	2.52326	0.0508671
CCDC114	934	0.678801	0.293362	0.0278373	0.432177	0.0410095	0.0948905	0.415152	2.11333	0.0286344
CCDC116	1049	0.702574	0.277407	0.0200191	0.394844	0.0284939	0.0721649	0.383905	2.36218	0.020428
CCDC120	706	0.684136	0.303116	0.0127479	0.443064	0.0186335	0.0420561	0.434959	2.16592	0.0129125
CCDC12A	3	1	0	0	0	0		0		0
CCDC13	834	0.693046	0.282974	0.0239808	0.408304	0.0346021	0.0847458	0.394649	2.25781	0.02457
CCDC136	1540	0.664935	0.297403	0.0376623	0.447266	0.0566406	0.126638	0.42329	1.9845	0.0391363
CCDC138	872	0.670872	0.297018	0.0321101	0.442735	0.0478632	0.108108	0.422512	2.03833	0.0331754
CCDC14	1048	0.700382	0.262405	0.0372137	0.374659	0.0531335	0.141818	0.355757	2.33758	0.0386521
CCDC141	1849	0.695511	0.260141	0.0443483	0.374028	0.0637636	0.170478	0.351608	2.28419	0.0464063
CCDC144A	1447	0.689012	0.280581	0.0304077	0.407222	0.0441324	0.108374	0.39001	2.21556	0.0313614
CCDC146	1029	0.677357	0.273081	0.0495627	0.403156	0.0731707	0.181495	0.375668	2.0994	0.0521472
CCDC148	742	0.688679	0.264151	0.0471698	0.383562	0.0684932	0.178571	0.358974	2.21212	0.049505
CCDC15	1022	0.719178	0.237769	0.0430528	0.330612	0.0598639	0.18107	0.311938	2.56098	0.0449898
CCDC150	1311	0.678871	0.276888	0.044241	0.407865	0.0651685	0.15978	0.382911	2.11401	0.0462889
CCDC151	624	0.647436	0.3125	0.0400641	0.482673	0.0618812	0.128205	0.454545	1.83636	0.0417362
CCDC157	2054	0.669426	0.310613	0.0199611	0.464	0.0298182	0.0642633	0.450565	2.02504	0.0203676
CCDC158	1242	0.701288	0.259259	0.0394525	0.36969	0.0562572	0.152174	0.35	2.34771	0.0410729
CCDC166	609	0.650246	0.321839	0.0279146	0.494949	0.0429293	0.0867347	0.474576	1.85915	0.0287162
CCDC175	874	0.679634	0.28032	0.0400458	0.412458	0.0589226	0.142857	0.389507	2.12143	0.0417163
CCDC18	1968	0.673272	0.289126	0.0376016	0.429434	0.0558491	0.130053	0.406719	2.06065	0.0390707
CCDC2	4	1	0	0	0	0		0		0
CCDC27	1123	0.653606	0.30098	0.0454141	0.46049	0.0694823	0.150888	0.430573	1.88689	0.0475746
CCDC28A	333	0.672673	0.288288	0.039039	0.428571	0.0580357	0.135417	0.405063	2.05505	0.040625
CCDC2A	2	1	0	0	0	0		0		0
CCDC3	6	1	0	0	0	0		0		0
CCDC30	2126	0.667451	0.308561	0.0239887	0.462297	0.0359408	0.0777439	0.446259	2.00707	0.0245783
CCDC33	1494	0.682731	0.283802	0.0334672	0.415686	0.0490196	0.117925	0.396262	2.1519	0.034626
CCDC38	676	0.684911	0.278107	0.0369822	0.406048	0.0539957	0.132979	0.385246	2.17371	0.0384025
CCDC39	1154	0.724437	0.250433	0.02513	0.345694	0.034689	0.100346	0.334104	2.62893	0.0257778
CCDC4	8	1	0	0	0	0		0		0
CCDC40	2159	0.677165	0.295044	0.0277906	0.435705	0.0410397	0.0941915	0.418528	2.09756	0.028585
CCDC5	2	1	0	0	0	0		0		0
CCDC50	597	0.664992	0.301508	0.0335008	0.453401	0.0503778	0.111111	0.431655	1.985	0.034662
CCDC54	363	0.716253	0.239669	0.0440771	0.334615	0.0615385	0.183908	0.315217	2.52427	0.0461095
CCDC57	1835	0.653951	0.312262	0.0337875	0.4775	0.0516667	0.108202	0.454041	1.88976	0.034969
CCDC5A	7	1	0	0	0	0		0		0
CCDC6	399	0.573935	0.411028	0.0150376	0.716157	0.0262009	0.0365854	0.697872	1.34706	0.0152672
CCDC60	639	0.70892	0.258216	0.0328638	0.364238	0.0463576	0.127273	0.348101	2.43548	0.0339806
CCDC61	676	0.68787	0.281065	0.0310651	0.408602	0.0451613	0.110526	0.390947	2.20379	0.0320611
CCDC62	713	0.680224	0.28331	0.0364656	0.416495	0.0536082	0.128713	0.395303	2.12719	0.0378457
CCDC63	662	0.694864	0.271903	0.0332326	0.391304	0.0478261	0.122222	0.373444	2.27723	0.034375
CCDC66	1190	0.69916	0.246218	0.0546218	0.352163	0.078125	0.221843	0.326644	2.32402	0.0577778
CCDC68	359	0.690808	0.272981	0.0362117	0.395161	0.0524194	0.132653	0.375479	2.23423	0.0375723
CCDC7	7	1	0	0	0	0		0		0
CCDC73	1177	0.693288	0.272727	0.0339847	0.393382	0.0490196	0.124611	0.375	2.26039	0.0351803
CCDC8	769	0.691808	0.288687	0.0195059	0.417293	0.0281955	0.0675676	0.40585	2.24473	0.0198939
CCDC80	1111	0.69667	0.287129	0.0162016	0.412145	0.0232558	0.0564263	0.402778	2.29674	0.0164684
CCDC81	683	0.708638	0.245974	0.045388	0.347107	0.0640496	0.184524	0.326214	2.43216	0.047546
CCDC82	1314	0.705479	0.270928	0.0235921	0.384035	0.0334412	0.0870787	0.371608	2.39535	0.0241621
CCDC83	499	0.725451	0.248497	0.0260521	0.342541	0.0359116	0.104839	0.330667	2.64234	0.026749
CCDC85A	1104	0.662138	0.313406	0.0244565	0.473324	0.0369357	0.0780347	0.456464	1.95979	0.0250696
CCDC87	1892	0.674419	0.306025	0.019556	0.453762	0.0289969	0.0639033	0.440975	2.07143	0.0199461
CCDC88A	1770	0.675706	0.315254	0.00903955	0.466555	0.0133779	0.0286738	0.460396	2.08362	0.00912201
CCDC88B	2476	0.655897	0.315024	0.0290792	0.480296	0.044335	0.0923077	0.459906	1.9061	0.0299501
CCDC88C	2742	0.661926	0.320204	0.0178702	0.483747	0.0269972	0.0558087	0.47103	1.95793	0.0181953
CCDC9	858	0.685315	0.296037	0.018648	0.431973	0.0272109	0.0629921	0.42053	2.17778	0.0190024
CCDC93	814	0.674447	0.302211	0.0233415	0.448087	0.0346084	0.0772358	0.433099	2.0717	0.0238994
CCDC96	1703	0.675279	0.305344	0.0193776	0.452174	0.0286957	0.0634615	0.43956	2.07957	0.0197605
CCDCA	1	1	0	0	0	0		0		0
CCDCB	8	1	0	0	0	0		0		0
CCDCC	9	1	0	0	0	0		0		0
CCHCR1	1375	0.692364	0.273455	0.0341818	0.394958	0.0493697	0.125	0.376376	2.25059	0.0353916
CCIN	628	0.66242	0.321656	0.0159236	0.485577	0.0240385	0.049505	0.474178	1.96226	0.0161812
CCKAR	570	0.696491	0.289474	0.0140351	0.415617	0.0201511	0.0484848	0.407407	2.2948	0.0142349
CCKBR	753	0.693227	0.285525	0.0212483	0.411877	0.0306513	0.0744186	0.399628	2.25974	0.0217096
CCM2	647	0.633694	0.347759	0.0185471	0.54878	0.0292683	0.0533333	0.533175	1.72996	0.0188976
CCNA1	470	0.648936	0.325532	0.0255319	0.501639	0.0393443	0.0784314	0.48265	1.84848	0.0262009
CCNB3	955	0.709948	0.285864	0.00418848	0.402655	0.00589971	0.014652	0.400293	2.44765	0.0042061
CCND1	357	0.579832	0.408964	0.0112045	0.705314	0.0193237	0.0273973	0.691943	1.38	0.0113314
CCND2	285	0.536842	0.442105	0.0210526	0.823529	0.0392157	0.047619	0.792453	1.15909	0.0215054
CCND3	556	0.611511	0.366906	0.0215827	0.6	0.0352941	0.0588235	0.579545	1.57407	0.0220588
CCNE1	414	0.620773	0.371981	0.00724638	0.599222	0.0116732	0.0194805	0.592308	1.63694	0.00729927
CCNF	987	0.653495	0.329281	0.0172239	0.503876	0.0263566	0.0523077	0.490937	1.88596	0.0175258
CCNJL	756	0.645503	0.328042	0.026455	0.508197	0.0409836	0.0806452	0.488189	1.8209	0.0271739
CCNL1	516	0.612403	0.372093	0.0155039	0.607595	0.0253165	0.0416667	0.592593	1.58	0.015748
CCNL2	902	0.640798	0.345898	0.0133038	0.539792	0.0207612	0.0384615	0.528814	1.78395	0.0134831
CCNT1	736	0.668478	0.317935	0.013587	0.47561	0.0203252	0.042735	0.466135	2.01639	0.0137741
CCNT2	710	0.66338	0.325352	0.0112676	0.490446	0.0169851	0.034632	0.482255	1.97071	0.011396
CCP11	3	1	0	0	0	0		0		0
CCP110	1032	0.70155	0.276163	0.0222868	0.393646	0.031768	0.0807018	0.381526	2.35065	0.0227948
CCPG1	1016	0.693898	0.280512	0.0255906	0.404255	0.0368794	0.0912281	0.389877	2.26688	0.0262626
CCR2	479	0.672234	0.304802	0.0229645	0.453416	0.0341615	0.0753425	0.438438	2.05096	0.0235043
CCR3	515	0.669903	0.314563	0.015534	0.469565	0.0231884	0.0493827	0.458924	2.02941	0.0157791
CCR4	372	0.604839	0.373656	0.0215054	0.617778	0.0355556	0.057554	0.596567	1.53061	0.021978
CCR5	512	0.705078	0.261719	0.0332031	0.371191	0.0470914	0.126866	0.354497	2.39073	0.0343434
CCR6	338	0.576923	0.402367	0.0207101	0.697436	0.0358974	0.0514706	0.673267	1.36364	0.021148
CCR7	378	0.595238	0.399471	0.00529101	0.671111	0.00888889	0.013245	0.665198	1.47059	0.00531915
CCR9	777	0.682111	0.306306	0.011583	0.449057	0.0169811	0.0378151	0.441558	2.14575	0.0117188
CCSER2	1201	0.723564	0.260616	0.0158201	0.360184	0.0218642	0.0607029	0.352477	2.61747	0.0160745
CCT	1	1	0	0	0	0		0		0
CCT3	636	0.707547	0.289308	0.00314465	0.408889	0.00444444	0.0108696	0.40708	2.41935	0.00315457
CCT5	622	0.660772	0.336013	0.00321543	0.508516	0.00486618	0.00956938	0.506053	1.94787	0.00322581
CCT6A	892	0.652466	0.343049	0.0044843	0.525773	0.00687285	0.0130719	0.522184	1.87742	0.0045045
CCT6B	1015	0.689655	0.291626	0.0187192	0.422857	0.0271429	0.0641892	0.411683	2.22222	0.0190763
CCT7	562	0.608541	0.386121	0.00533808	0.634503	0.00877193	0.0138249	0.628986	1.55455	0.00536673
CCT8	528	0.67803	0.314394	0.00757576	0.463687	0.0111732	0.0240964	0.458564	2.10588	0.00763359
CCT8L2	665	0.657143	0.315789	0.0270677	0.480549	0.0411899	0.0857143	0.461538	1.91667	0.0278207
CD1	3	1	0	0	0	0		0		0
CD101	1176	0.678571	0.289966	0.0314626	0.427318	0.0463659	0.108504	0.408383	2.11111	0.0324846
CD109	1615	0.699071	0.265015	0.0359133	0.379097	0.0513729	0.135514	0.360573	2.32305	0.0372511
CD163	1156	0.663495	0.311419	0.0250865	0.469361	0.0378096	0.0805556	0.452261	1.97172	0.025732
CD163L1	1600	0.6925	0.265	0.0425	0.382671	0.0613718	0.160377	0.360544	2.25203	0.0443864
CD180	730	0.691781	0.286301	0.0219178	0.413861	0.0316832	0.076555	0.401152	2.24444	0.022409
CD19	639	0.647887	0.336463	0.0156495	0.519324	0.0241546	0.0465116	0.507075	1.84	0.0158983
CD1A	462	0.655844	0.287879	0.0562771	0.438944	0.0858086	0.195489	0.404255	1.90566	0.059633
CD1B	574	0.6777	0.28223	0.0400697	0.416452	0.059126	0.141975	0.393204	2.1027	0.0417423
CD1C	483	0.691511	0.267081	0.0414079	0.386228	0.0598802	0.155039	0.364407	2.24161	0.0431965
CD1D	439	0.67426	0.298405	0.0273349	0.442568	0.0405405	0.0916031	0.425325	2.06993	0.028103
CD1E	527	0.643264	0.29981	0.056926	0.466077	0.0884956	0.189873	0.428184	1.80319	0.0603622
CD2	437	0.691076	0.292906	0.0160183	0.423841	0.0231788	0.0546875	0.414239	2.23704	0.0162791
CD200R1L	326	0.668712	0.300613	0.0306748	0.449541	0.0458716	0.102041	0.429825	2.01852	0.0316456
CD209	512	0.669922	0.275391	0.0546875	0.411079	0.0816327	0.198582	0.380054	2.02959	0.0578512
CD22	1015	0.649261	0.330049	0.0206897	0.508346	0.0318665	0.0626866	0.492647	1.85112	0.0211268
CD226	369	0.701897	0.284553	0.0135501	0.405405	0.019305	0.047619	0.397727	2.35455	0.0137363
CD24	1	1	0	0	0	0		0		0
CD248	942	0.651805	0.33121	0.0169851	0.508143	0.0260586	0.0512821	0.495238	1.87195	0.0172786
CD276	768	0.63151	0.34375	0.0247396	0.54433	0.0391753	0.0719697	0.52381	1.71378	0.0253672
CD2AP	678	0.710914	0.277286	0.0117994	0.390041	0.0165975	0.0425532	0.383673	2.45918	0.0119403
CD2R1L	1	1	0	0	0	0		0		0
CD3	3	1	0	0	0	0		0		0
CD300LB	307	0.651466	0.312704	0.0358306	0.48	0.055	0.114583	0.454976	1.86916	0.0371622
CD300LG	502	0.681275	0.296813	0.0219124	0.435673	0.0321637	0.0738255	0.422096	2.1375	0.0224033
CD33	497	0.712274	0.261569	0.0261569	0.367232	0.0367232	0.1	0.354223	2.47552	0.0268595
CD36	824	0.730583	0.20267	0.0667476	0.277409	0.0913621	0.329341	0.254186	2.71171	0.0715215
CD3LG	2	1	0	0	0	0		0		0
CD4	536	0.654851	0.33209	0.0130597	0.507123	0.019943	0.0393258	0.497207	1.8973	0.0132325
CD44	940	0.68617	0.295745	0.0180851	0.431008	0.0263566	0.0611511	0.41994	2.18644	0.0184182
CD5	572	0.659091	0.318182	0.0227273	0.482759	0.0344828	0.0714286	0.466667	1.93333	0.0232558
CD5L	453	0.642384	0.293598	0.0640177	0.457045	0.0996564	0.218045	0.415625	1.7963	0.0683962
CD6	760	0.625	0.347368	0.0276316	0.555789	0.0442105	0.0795455	0.532258	1.66667	0.0284168
CD79B	248	0.556452	0.415323	0.0282258	0.746377	0.0507246	0.0679612	0.710345	1.25455	0.0290456
CD84	380	0.705263	0.278947	0.0157895	0.395522	0.0223881	0.0566038	0.386861	2.39286	0.0160428
CD86	340	0.717647	0.270588	0.0117647	0.377049	0.0163934	0.0434783	0.370968	2.54167	0.0119048
CD93	994	0.643863	0.326962	0.0291751	0.507812	0.0453125	0.0892308	0.4858	1.80791	0.0300518
CD96	1013	0.701876	0.271471	0.0266535	0.386779	0.0379747	0.0981818	0.372629	2.3543	0.0273834
CDAN1	1733	0.657819	0.323716	0.0184651	0.492105	0.0280702	0.057041	0.478669	1.92243	0.0188125
CDC14A	776	0.671392	0.305412	0.0231959	0.454894	0.0345489	0.0759494	0.439703	2.04314	0.0237467
CDC16	631	0.627575	0.351823	0.0206022	0.560606	0.0328283	0.0585586	0.542787	1.68511	0.0210356
CDC20B	849	0.693757	0.276796	0.0294464	0.398981	0.0424448	0.106383	0.382736	2.26538	0.0303398
CDC23	496	0.608871	0.375	0.016129	0.615894	0.0264901	0.0430108	0.6	1.5567	0.0163934
CDC25B	733	0.635744	0.354707	0.0095498	0.55794	0.0150215	0.0269231	0.549683	1.74532	0.00964187
CDC27	964	0.644191	0.324689	0.0311203	0.504026	0.0483092	0.0958466	0.480799	1.8105	0.0321199
CDC2B	2	1	0	0	0	0		0		0
CDC37	490	0.644898	0.344898	0.0102041	0.53481	0.0158228	0.0295858	0.52648	1.81609	0.0103093
CDC40	528	0.640152	0.348485	0.0113636	0.544379	0.0177515	0.0326087	0.534884	1.77895	0.0114943
CDC42BPA	1746	0.689003	0.29496	0.0160367	0.428096	0.0232751	0.0543689	0.418359	2.21547	0.016298
CDC42BPB	1926	0.603323	0.389408	0.00726895	0.645439	0.0120482	0.0186667	0.637755	1.52094	0.00732218
CDC42BPG	2407	0.612796	0.358122	0.0290818	0.584407	0.0474576	0.0812065	0.557929	1.58262	0.0299529
CDC45	747	0.692102	0.289157	0.0187416	0.417795	0.0270793	0.0648148	0.40678	2.24783	0.0190996
CDC5L	660	0.613636	0.378788	0.00757576	0.617284	0.0123457	0.02	0.609756	1.58824	0.00763359
CDC7	566	0.69788	0.275618	0.0265018	0.394937	0.0379747	0.0961538	0.380488	2.30994	0.0272232
CDC73	949	0.772392	0.207587	0.0200211	0.268759	0.0259209	0.0964467	0.261968	3.39352	0.0204301
CDCA2	1279	0.698984	0.284597	0.0164191	0.407159	0.0234899	0.0576923	0.397814	2.32208	0.0166932
CDCA7	428	0.698598	0.28271	0.0186916	0.404682	0.0267559	0.0661157	0.394137	2.31783	0.0190476
CDCA7L	633	0.666667	0.304897	0.028436	0.457346	0.042654	0.0932642	0.438636	2	0.0292683
CDCP1	946	0.662791	0.317125	0.0200846	0.478469	0.030303	0.0633333	0.464396	1.96552	0.0204962
CDCP2	777	0.666667	0.298584	0.034749	0.447876	0.0521236	0.116379	0.425688	2	0.036
CDH	2	1	0	0	0	0		0		0
CDH1	1922	0.655047	0.319979	0.024974	0.488483	0.0381255	0.0780488	0.470543	1.89894	0.0256137
CDH10	743	0.640646	0.339166	0.0201884	0.529412	0.0315126	0.0595238	0.513238	1.78277	0.0206044
CDH11	980	0.662245	0.333673	0.00408163	0.503852	0.00616333	0.0122324	0.500766	1.96073	0.00409836
CDH12	878	0.675399	0.307517	0.0170843	0.455312	0.0252951	0.0555556	0.444079	2.0807	0.0173812
CDH13	1259	0.634631	0.356632	0.00873709	0.561952	0.0137672	0.0244989	0.554321	1.73696	0.0088141
CDH15	1415	0.650177	0.324382	0.0254417	0.498913	0.0391304	0.0784314	0.480126	1.85859	0.0261059
CDH16	1119	0.683646	0.294013	0.0223414	0.430065	0.0326797	0.0759878	0.416456	2.16102	0.0228519
CDH17	966	0.692547	0.281573	0.0258799	0.406577	0.0373692	0.0919118	0.391931	2.25253	0.0265675
CDH18	858	0.679487	0.305361	0.0151515	0.4494	0.0222985	0.0496183	0.439597	2.12	0.0153846
CDH19	971	0.703399	0.270855	0.0257467	0.385066	0.0366032	0.095057	0.371469	2.37153	0.0264271
CDH2	1026	0.633528	0.346004	0.0204678	0.546154	0.0323077	0.0591549	0.529061	1.72872	0.0208955
CDH20	972	0.647119	0.345679	0.00720165	0.534181	0.0111288	0.0208333	0.528302	1.83382	0.00725389
CDH22	997	0.615848	0.367101	0.0170512	0.596091	0.0276873	0.0464481	0.580032	1.60313	0.0173469
CDH23	5412	0.661308	0.325942	0.0127494	0.492875	0.0192791	0.0391156	0.483553	1.95254	0.0129141
CDH24	1258	0.653418	0.321145	0.0254372	0.491484	0.0389294	0.0792079	0.473068	1.88532	0.0261011
CDH26	1190	0.667227	0.297479	0.0352941	0.445844	0.0528967	0.118644	0.423445	2.00505	0.0365854
CDH3	1152	0.644097	0.33941	0.0164931	0.526954	0.0256065	0.0485934	0.513798	1.80976	0.0167696
CDH4	1205	0.614108	0.379253	0.006639	0.617568	0.0108108	0.0175055	0.610963	1.5914	0.00668338
CDH5	1041	0.639769	0.342939	0.0172911	0.536036	0.027027	0.0504202	0.52193	1.776	0.0175953
CDH6	800	0.6175	0.36625	0.01625	0.593117	0.0263158	0.0443686	0.577909	1.61438	0.0165184
CDH7	833	0.619448	0.366146	0.0144058	0.591085	0.0232558	0.0393443	0.577652	1.62776	0.0146163
CDH8	795	0.637736	0.354717	0.00754717	0.556213	0.0118343	0.0212766	0.549708	1.76042	0.00760456
CDH9	886	0.660271	0.326185	0.013544	0.494017	0.0205128	0.0415225	0.484087	1.94352	0.01373
CDHR1	1424	0.642556	0.327247	0.0301966	0.50929	0.0469945	0.0922747	0.48643	1.79764	0.0311369
CDHR2	2403	0.658344	0.324594	0.017062	0.493047	0.0259166	0.0525641	0.480591	1.92692	0.0173582
CDHR3	1223	0.66067	0.304988	0.0343418	0.461634	0.0519802	0.112601	0.438824	1.94699	0.0355631
CDHR4	1121	0.661017	0.305977	0.0330062	0.462888	0.0499325	0.107872	0.440874	1.95	0.0341328
CDHR5	2272	0.626761	0.353433	0.0198063	0.563904	0.0316011	0.0560399	0.54663	1.67925	0.0202066
CDK1	1	1	0	0	0	0		0		0
CDK11A	1183	0.627219	0.331361	0.0414201	0.528302	0.0660377	0.125	0.495575	1.68254	0.0432099
CDK11B	1010	0.536634	0.444554	0.0188119	0.828413	0.0350554	0.0423163	0.800357	1.15812	0.0191726
CDK12	1423	0.665495	0.330288	0.00421644	0.496304	0.0063358	0.012766	0.493179	1.9895	0.0042343
CDK13	1651	0.639007	0.347062	0.013931	0.543128	0.0218009	0.0401396	0.53154	1.77013	0.0141278
CDK14	508	0.639764	0.340551	0.019685	0.532308	0.0307692	0.0578035	0.516418	1.77596	0.0200803
CDK15	509	0.660118	0.300589	0.0392927	0.455357	0.0595238	0.130719	0.429775	1.9422	0.0408998
CDK17	398	0.61809	0.366834	0.0150754	0.593496	0.0243902	0.0410959	0.579365	1.61842	0.0153061
CDK18	684	0.684211	0.290936	0.0248538	0.425214	0.0363248	0.0854271	0.410309	2.16667	0.0254873
CDK19	702	0.603989	0.383191	0.0128205	0.634434	0.0212264	0.0334572	0.621247	1.52518	0.012987
CDK5RAP1	701	0.653352	0.309558	0.0370899	0.473799	0.0567686	0.119816	0.448347	1.88477	0.0385185
CDK5RAP2	2111	0.689247	0.284699	0.026054	0.413058	0.0378007	0.0915141	0.398013	2.21799	0.026751
CDK6	251	0.569721	0.422311	0.00796813	0.741259	0.013986	0.0188679	0.731034	1.32407	0.00803213
CDK8	288	0.524306	0.444444	0.03125	0.847682	0.0596026	0.0703125	0.8	1.10219	0.0322581
CDKAL1	637	0.654631	0.321821	0.0235479	0.491607	0.0359712	0.0731707	0.474537	1.89545	0.0241158
CDKL2	614	0.70684	0.249186	0.0439739	0.352535	0.062212	0.176471	0.331887	2.41111	0.0459966
CDKL5	1355	0.676753	0.264945	0.0583026	0.391494	0.0861505	0.220056	0.360442	2.09361	0.0619122
CDKN1A	326	0.723926	0.242331	0.0337423	0.334746	0.0466102	0.139241	0.319838	2.62222	0.0349206
CDKN1B	790	0.670886	0.321519	0.00759494	0.479245	0.0113208	0.023622	0.473881	2.03846	0.00765306
CDKN2A	875	0.670857	0.297143	0.032	0.44293	0.0477002	0.107692	0.422764	2.03819	0.0330579
CDON	1468	0.697548	0.282698	0.0197548	0.405273	0.0283203	0.0698795	0.394112	2.30631	0.0201529
CDR1	249	0.674699	0.277108	0.0481928	0.410714	0.0714286	0.173913	0.383333	2.07407	0.0506329
CDRT1	882	0.689342	0.286848	0.0238095	0.416118	0.0345395	0.083004	0.402226	2.21898	0.0243902
CDS1	397	0.702771	0.274559	0.02267	0.390681	0.0322581	0.0825688	0.378472	2.36441	0.0231959
CDX4	266	0.703008	0.278195	0.018797	0.395722	0.026738	0.0675676	0.385417	2.36709	0.0191571
CDYL	611	0.600655	0.382979	0.0163666	0.637602	0.027248	0.042735	0.62069	1.5041	0.0166389
CDYL2	753	0.621514	0.363878	0.0146082	0.58547	0.0235043	0.040146	0.572025	1.64211	0.0148248
CEACAM	1	1	0	0	0	0		0		0
CEACAM1	631	0.673534	0.304279	0.022187	0.451765	0.0329412	0.0729167	0.437358	2.06311	0.0226904
CEACAM16	650	0.649231	0.330769	0.02	0.509479	0.0308057	0.0604651	0.494253	1.85088	0.0204082
CEACAM18	448	0.698661	0.279018	0.0223214	0.399361	0.0319489	0.08	0.386997	2.31852	0.0228311
CEACAM20	734	0.668937	0.307902	0.0231608	0.460285	0.0346232	0.0752212	0.444882	2.02058	0.0237099
CEACAM5	891	0.652076	0.320988	0.026936	0.492255	0.0413081	0.0839161	0.472727	1.87419	0.0276817
CEACAM6	460	0.643478	0.33913	0.0173913	0.527027	0.027027	0.0512821	0.513158	1.80488	0.0176991
CEACAM7	364	0.706044	0.258242	0.0357143	0.365759	0.0505837	0.138298	0.348148	2.40187	0.037037
CEACAM8	523	0.690249	0.282983	0.0267686	0.409972	0.0387812	0.0945946	0.394667	2.2284	0.0275049
CEBPA	548	0.618613	0.366788	0.0145985	0.59292	0.0235988	0.039801	0.579251	1.62201	0.0148148
CEBPZ	1566	0.695402	0.291188	0.01341	0.418733	0.0192837	0.0460526	0.410811	2.28302	0.0135922
CECR2	1731	0.687464	0.304448	0.00808781	0.442857	0.0117647	0.0265655	0.437708	2.19963	0.00815376
CEL	1393	0.656856	0.328787	0.0143575	0.500546	0.0218579	0.0436681	0.48984	1.91423	0.0145666
CELF1	727	0.623109	0.371389	0.00550206	0.596026	0.00883002	0.0148148	0.59081	1.65328	0.0055325
CELF2	469	0.511727	0.484009	0.00426439	0.945833	0.00833333	0.00881057	0.938017	1.04803	0.00428266
CELF3	443	0.564334	0.41535	0.020316	0.736	0.036	0.048913	0.710425	1.29534	0.0207373
CELF4	710	0.616901	0.367606	0.015493	0.59589	0.0251142	0.0421456	0.581292	1.61029	0.0157368
CELF5	455	0.516484	0.479121	0.0043956	0.92766	0.00851064	0.00917431	0.919831	1.06818	0.00441501
CELF6	544	0.630515	0.356618	0.0128676	0.565598	0.0204082	0.0360825	0.554286	1.70647	0.0130354
CELSR1	4521	0.637912	0.35501	0.00707808	0.556519	0.0110957	0.0199377	0.550412	1.76176	0.00712854
CELSR2	3721	0.638001	0.353937	0.00806235	0.55476	0.0126369	0.022779	0.547837	1.76244	0.00812788
CELSR3	3688	0.643709	0.350054	0.00623644	0.543808	0.00968829	0.0178156	0.53859	1.8067	0.00627558
CENPB	698	0.565903	0.425501	0.00859599	0.751899	0.0151899	0.020202	0.740648	1.30363	0.00867052
CENPE	2426	0.706513	0.279472	0.0140148	0.395566	0.0198366	0.0501475	0.387872	2.4073	0.014214
CENPF	3240	0.698148	0.270062	0.0317901	0.386826	0.0455349	0.117714	0.369979	2.31288	0.0328339
CENPI	418	0.691388	0.30622	0.00239234	0.442907	0.00346021	0.0078125	0.441379	2.24031	0.00239808
CENPJ	1779	0.702642	0.258572	0.0387858	0.368	0.0552	0.15	0.348749	2.36295	0.0403509
CEP	9	1	0	0	0	0		0		0
CEP104	1342	0.694486	0.28614	0.0193741	0.412017	0.027897	0.0677083	0.400835	2.27317	0.0197568
CEP112	1093	0.698079	0.26258	0.0393413	0.376147	0.0563565	0.149826	0.356079	2.31212	0.0409524
CEP12	6	1	0	0	0	0		0		0
CEP120	1128	0.711879	0.255319	0.0328014	0.358655	0.0460772	0.128472	0.342857	2.47077	0.0339138
CEP128	1255	0.699602	0.262948	0.0374502	0.375854	0.0535308	0.142424	0.356757	2.32891	0.0389073
CEP135	1188	0.705387	0.252525	0.0420875	0.357995	0.0596659	0.166667	0.337838	2.39429	0.0439367
CEP14	1	1	0	0	0	0		0		0
CEP152	1881	0.69697	0.265284	0.0377459	0.380625	0.0541571	0.142285	0.361071	2.3	0.0392265
CEP164	2203	0.679074	0.290059	0.030867	0.427139	0.0454545	0.106416	0.408568	2.11598	0.0318501
CEP17	1	1	0	0	0	0		0		0
CEP170	1540	0.699351	0.283766	0.0168831	0.405757	0.0241411	0.0594966	0.396192	2.32613	0.0171731
CEP192	2696	0.708828	0.267062	0.0241098	0.376766	0.0340136	0.0902778	0.364372	2.43439	0.0247054
CEP2	8	1	0	0	0	0		0		0
CEP25	15	1	0	0	0	0		0		0
CEP250	2678	0.666916	0.297237	0.0358476	0.445689	0.0537514	0.120603	0.422954	2.00224	0.0371805
CEP290	2558	0.684519	0.25645	0.0590305	0.374643	0.0862364	0.230183	0.3449	2.16976	0.0627337
CEP35	3	1	0	0	0	0		0		0
CEP350	3113	0.723097	0.263733	0.0131706	0.364727	0.0182141	0.0499391	0.358202	2.61137	0.0133464
CEP5	8	1	0	0	0	0		0		0
CEP57	755	0.646358	0.323179	0.0304636	0.5	0.0471311	0.0942623	0.477495	1.82772	0.0314208
CEP5L	4	1	0	0	0	0		0		0
CEP6	2	1	0	0	0	0		0		0
CEP63	815	0.70184	0.244172	0.0539877	0.347902	0.0769231	0.221106	0.323052	2.35391	0.0570687
CEP68	1014	0.690335	0.294872	0.0147929	0.427143	0.0214286	0.0501672	0.418182	2.2293	0.015015
CEP7	8	1	0	0	0	0		0		0
CEP70	718	0.696379	0.261838	0.0417827	0.376	0.06	0.159574	0.354717	2.29358	0.0436047
CEP72	1241	0.650282	0.32635	0.0233683	0.501859	0.0359356	0.0716049	0.48445	1.85945	0.0239274
CEP76	686	0.701166	0.263848	0.0349854	0.376299	0.049896	0.132597	0.358416	2.34634	0.0362538
CEP78	840	0.708333	0.255952	0.0357143	0.361345	0.0504202	0.139535	0.344	2.42857	0.037037
CEP85	830	0.687952	0.279518	0.0325301	0.406305	0.0472855	0.116379	0.38796	2.20463	0.0336239
CEP85L	954	0.688679	0.28826	0.0230608	0.418569	0.0334855	0.08	0.405007	2.21212	0.0236052
CEP89	1271	0.666404	0.295043	0.0385523	0.442739	0.0578512	0.130667	0.418527	1.99764	0.0400982
CEP95	1118	0.703936	0.259392	0.0366726	0.368488	0.0520966	0.141379	0.350242	2.37764	0.0380687
CEP97	868	0.678571	0.286866	0.0345622	0.42275	0.0509338	0.120482	0.402262	2.11111	0.0357995
CER1	419	0.708831	0.274463	0.0167064	0.387205	0.023569	0.0608696	0.378289	2.43443	0.0169903
CERCAM	815	0.667485	0.309202	0.0233129	0.463235	0.0349265	0.0753968	0.447602	2.00738	0.0238693
CERK	678	0.638643	0.339233	0.0221239	0.531178	0.034642	0.0652174	0.513393	1.76735	0.0226244
CERKL	815	0.695706	0.265031	0.0392638	0.380952	0.0564374	0.148148	0.360601	2.28629	0.0408685
CES1	774	0.677003	0.297158	0.0258398	0.438931	0.0381679	0.0869565	0.422794	2.096	0.0265252
CES2	868	0.554147	0.423963	0.0218894	0.765073	0.039501	0.0516304	0.736	1.24289	0.0223793
CES3	682	0.668622	0.300587	0.0307918	0.449561	0.0460526	0.102439	0.429769	2.0177	0.03177
CES4A	789	0.669202	0.295311	0.035488	0.441288	0.0530303	0.120172	0.419065	2.02299	0.0367937
CES5A	838	0.661098	0.298329	0.0405728	0.451264	0.0613718	0.136	0.42517	1.9507	0.0422886
CETN1	205	0.658537	0.317073	0.0243902	0.481481	0.037037	0.0769231	0.464286	1.92857	0.025
CETP	667	0.677661	0.292354	0.029985	0.431416	0.0442478	0.102564	0.413136	2.10233	0.0309119
CFB	918	0.639434	0.344227	0.0163399	0.53833	0.0255537	0.0474684	0.524917	1.77341	0.0166113
CFH	1436	0.674791	0.307103	0.0181058	0.455108	0.0268318	0.0589569	0.443216	2.07495	0.0184397
CFHR1	431	0.635731	0.315545	0.0487239	0.49635	0.0766423	0.154412	0.461017	1.74522	0.0512195
CFHR2	343	0.6793	0.259475	0.0612245	0.381974	0.0901288	0.235955	0.350394	2.11818	0.0652174
CFHR3	379	0.672823	0.269129	0.0580475	0.4	0.0862745	0.215686	0.368231	2.05645	0.0616246
CFHR4	780	0.674359	0.275641	0.05	0.408745	0.0741445	0.181395	0.380531	2.07087	0.0526316
CFHR5	769	0.691808	0.253576	0.0546164	0.366541	0.0789474	0.215385	0.339721	2.24473	0.0577717
CFI	762	0.685039	0.278215	0.0367454	0.40613	0.0536398	0.132075	0.385455	2.175	0.0381471
CFP	399	0.621554	0.348371	0.0300752	0.560484	0.0483871	0.0863309	0.534615	1.64238	0.0310078
CFTR	2577	0.719053	0.196352	0.0845945	0.273071	0.117647	0.43083	0.244326	2.55939	0.092412
CGN	1434	0.698745	0.257322	0.0439331	0.368263	0.0628743	0.170732	0.346479	2.31944	0.0459519
CGNL1	1842	0.709555	0.258958	0.0314875	0.364958	0.0443764	0.121593	0.349451	2.44299	0.0325112
CHAD	1067	0.678538	0.311153	0.0103093	0.458564	0.0151934	0.0331325	0.451701	2.11079	0.0104167
CHAF1A	1156	0.631488	0.364187	0.00432526	0.576712	0.00684932	0.0118765	0.572789	1.71362	0.00434405
CHAF1B	522	0.657088	0.329502	0.01341	0.501458	0.0204082	0.0406977	0.491429	1.9162	0.0135922
CHAT	1064	0.667293	0.304511	0.0281955	0.456338	0.0422535	0.0925926	0.437838	2.00565	0.0290135
CHD	13	1	0	0	0	0		0		0
CHD1	1338	0.648729	0.343049	0.00822123	0.528802	0.0126728	0.0239651	0.522184	1.84681	0.00828937
CHD1L	1303	0.697621	0.273983	0.028396	0.392739	0.0407041	0.103641	0.377378	2.30711	0.0292259
CHD2	1521	0.600263	0.368179	0.0315582	0.613363	0.0525739	0.0857143	0.582726	1.50164	0.0325866
CHD3	2070	0.584058	0.405314	0.010628	0.693962	0.0181969	0.0262217	0.68156	1.40418	0.0107422
CHD4	1514	0.570013	0.423382	0.00660502	0.742758	0.0115875	0.0156006	0.73425	1.32565	0.00664894
CHD5	1941	0.579598	0.410098	0.010304	0.707556	0.0177778	0.0251256	0.695197	1.37868	0.0104112
CHD6	2444	0.667349	0.325286	0.00736498	0.487431	0.0110362	0.0226415	0.48211	2.00615	0.00741962
CHD7	3177	0.649984	0.309411	0.0406043	0.476029	0.0624697	0.131231	0.44804	1.85701	0.0423228
CHD8	2923	0.488881	0.264454	0.246664	0.540938	0.504549	0.93273	0.359535	0.956493	0.32743
CHD9	2478	0.680387	0.309524	0.0100888	0.454923	0.014828	0.0325945	0.448276	2.12879	0.0101916
CHDH	962	0.648649	0.325364	0.0259875	0.501603	0.0400641	0.0798722	0.48228	1.84615	0.0266809
CHEK1	691	0.694645	0.269175	0.0361795	0.3875	0.0520833	0.134409	0.368317	2.27488	0.0375375
CHEK2	1957	0.723556	0.233521	0.0429228	0.32274	0.059322	0.183807	0.304667	2.61738	0.0448478
CHERP	1266	0.575039	0.417852	0.007109	0.726648	0.0123626	0.0170132	0.717775	1.35316	0.0071599
CHFR	870	0.64023	0.336782	0.0229885	0.526032	0.0359066	0.0682594	0.507799	1.77955	0.0235294
CHGB	808	0.67698	0.293317	0.029703	0.433272	0.0438757	0.101266	0.415061	2.09579	0.0306122
CHI3L1	528	0.651515	0.318182	0.030303	0.488372	0.0465116	0.0952381	0.466667	1.86957	0.03125
CHIA	684	0.675439	0.28655	0.0380117	0.424242	0.0562771	0.132653	0.401639	2.08108	0.0395137
CHIT1	597	0.678392	0.294807	0.0268007	0.434568	0.0395062	0.0909091	0.418052	2.10938	0.0275387
CHL1	1642	0.717418	0.271011	0.0115713	0.377759	0.016129	0.0426966	0.371763	2.53879	0.0117067
CHM	479	0.651357	0.300626	0.0480167	0.461538	0.0737179	0.159722	0.429851	1.86826	0.0504386
CHML	1203	0.644223	0.340815	0.0149626	0.529032	0.0232258	0.0439024	0.517024	1.81075	0.0151899
CHN1	542	0.669742	0.315498	0.0147601	0.471074	0.0220386	0.0467836	0.460916	2.02793	0.0149813
CHN2	856	0.681075	0.301402	0.0175234	0.442539	0.025729	0.0581395	0.431438	2.13553	0.0178359
CHPF	1460	0.623288	0.359589	0.0171233	0.576923	0.0274725	0.047619	0.561497	1.65455	0.0174216
CHPF2	1300	0.673846	0.294615	0.0315385	0.437215	0.0468037	0.10705	0.417666	2.06604	0.0325655
CHRD	1621	0.658236	0.326959	0.0148057	0.49672	0.022493	0.045283	0.485793	1.92599	0.0150282
CHRDL1	364	0.700549	0.28022	0.0192308	0.4	0.027451	0.0686275	0.389313	2.33945	0.0196078
CHRDL2	626	0.615016	0.353035	0.0319489	0.574026	0.0519481	0.0904977	0.545679	1.59751	0.0330033
CHRM1	414	0.572464	0.42029	0.00724638	0.734177	0.0126582	0.0172414	0.725	1.33898	0.00729927
CHRM2	416	0.641827	0.346154	0.0120192	0.539326	0.0187266	0.0347222	0.529412	1.79195	0.0121655
CHRM3	600	0.596667	0.395	0.00833333	0.662011	0.0139665	0.021097	0.652893	1.47934	0.00840336
CHRM4	520	0.576923	0.417308	0.00576923	0.723333	0.01	0.0138249	0.716172	1.36364	0.00580271
CHRM5	948	0.978903	0	0.021097	0	0.0215517		0	46.4	0.0215517
CHRNA	3	1	0	0	0	0		0		0
CHRNA1	601	0.667221	0.304493	0.0282862	0.456359	0.042394	0.0928962	0.437799	2.005	0.0291096
CHRNA10	715	0.647552	0.328671	0.0237762	0.507559	0.0367171	0.0723404	0.489583	1.8373	0.0243553
CHRNA2	770	0.668831	0.307792	0.0233766	0.460194	0.0349515	0.0759494	0.444653	2.01961	0.0239362
CHRNA3	664	0.59488	0.381024	0.0240964	0.640506	0.0405063	0.0632411	0.615572	1.4684	0.0246914
CHRNA4	1086	0.616943	0.364641	0.0184162	0.591045	0.0298507	0.0505051	0.573913	1.61058	0.0187617
CHRNA5	555	0.691892	0.284685	0.0234234	0.411458	0.0338542	0.0822785	0.397985	2.24561	0.0239852
CHRNA6	553	0.688969	0.282098	0.0289331	0.409449	0.0419948	0.102564	0.392947	2.21512	0.0297952
CHRNA9	572	0.68007	0.298951	0.020979	0.439589	0.0308483	0.0701754	0.426434	2.12568	0.0214286
CHRNB1	721	0.680999	0.299584	0.0194175	0.439919	0.0285132	0.0648148	0.427723	2.13478	0.019802
CHRNB2	692	0.622832	0.355491	0.0216763	0.570766	0.0348028	0.0609756	0.55157	1.65134	0.0221566
CHRNB3	492	0.658537	0.306911	0.0345528	0.466049	0.0524691	0.112583	0.442815	1.92857	0.0357895
CHRNB4	784	0.627551	0.362245	0.0102041	0.577236	0.0162602	0.028169	0.568	1.68493	0.0103093
CHRND	1111	0.672367	0.311431	0.0162016	0.463186	0.0240964	0.0520231	0.452288	2.0522	0.0164684
CHRNG	857	0.696616	0.268378	0.0350058	0.38526	0.0502513	0.130435	0.366826	2.29615	0.0362757
CHST1	509	0.59332	0.392927	0.0137525	0.662252	0.0231788	0.035	0.647249	1.45894	0.0139442
CHST10	415	0.607229	0.366265	0.026506	0.603175	0.0436508	0.0723684	0.577947	1.54601	0.0272277
CHST11	402	0.634328	0.348259	0.0174129	0.54902	0.027451	0.05	0.534351	1.73469	0.0177215
CHST12	724	0.635359	0.350829	0.0138122	0.552174	0.0217391	0.0393701	0.540426	1.74242	0.0140056
CHST13	564	0.664894	0.319149	0.0159574	0.48	0.024	0.05	0.46875	1.98413	0.0162162
CHST15	851	0.655699	0.321974	0.0223267	0.491039	0.0340502	0.0693431	0.47487	1.90444	0.0228365
CHST2	684	0.616959	0.366959	0.0160819	0.594787	0.0260664	0.0438247	0.579677	1.61069	0.0163447
CHST3	750	0.64	0.344	0.016	0.5375	0.025	0.0465116	0.52439	1.77778	0.0162602
CHST4	476	0.695378	0.262605	0.0420168	0.377644	0.060423	0.16	0.356125	2.28276	0.0438596
CHST5	695	0.640288	0.343885	0.0158273	0.537079	0.0247191	0.0460251	0.524123	1.78	0.0160819
CHST6	744	0.655914	0.307796	0.0362903	0.469262	0.0553279	0.117904	0.44466	1.90625	0.0376569
CHST7	441	0.575964	0.412698	0.0113379	0.716535	0.019685	0.0274725	0.702703	1.35829	0.0114679
CHST8	606	0.678218	0.306931	0.0148515	0.452555	0.0218978	0.0483871	0.442857	2.10769	0.0150754
CHST9	488	0.702869	0.262295	0.0348361	0.373178	0.0495627	0.132812	0.355556	2.36552	0.0360934
CHSY1	1100	0.640909	0.345455	0.0136364	0.539007	0.0212766	0.0394737	0.527778	1.78481	0.0138249
CHSY3	1090	0.663303	0.319266	0.0174312	0.481328	0.0262794	0.0545977	0.469003	1.97003	0.0177404
CHTF1	22	1	0	0	0	0		0		0
CHTF18	4055	0.62836	0.354377	0.0172626	0.563972	0.0274725	0.0487126	0.548892	1.69078	0.0175659
CHUK	621	0.653784	0.326892	0.0193237	0.5	0.0295567	0.0591133	0.485646	1.88837	0.0197044
CIC	2979	0.621014	0.373951	0.00503525	0.602162	0.00810811	0.013465	0.597319	1.63862	0.00506073
CIITA	2296	0.635889	0.348432	0.0156794	0.547945	0.0246575	0.045	0.534759	1.74641	0.0159292
CILP	1479	0.71332	0.252197	0.0344828	0.353555	0.0483412	0.136729	0.337251	2.48821	0.0357143
CILP2	1971	0.671233	0.312024	0.0167428	0.464853	0.0249433	0.0536585	0.45354	2.04167	0.0170279
CIT	1981	0.638062	0.348814	0.0131247	0.546677	0.0205696	0.0376266	0.535659	1.7629	0.0132992
CIZ1	1118	0.658318	0.316637	0.0250447	0.480978	0.0380435	0.079096	0.463351	1.9267	0.0256881
CKAP2	782	0.691816	0.280051	0.028133	0.404806	0.0406654	0.100457	0.388988	2.24481	0.0289474
CKAP2L	1000	0.713	0.261	0.026	0.366059	0.0364656	0.0996169	0.35318	2.48432	0.026694
CKAP4	773	0.641656	0.347995	0.0103493	0.542339	0.016129	0.0297398	0.53373	1.79061	0.0104575
CKAP5	1604	0.668329	0.32793	0.00374065	0.490672	0.00559701	0.0114068	0.487941	2.01504	0.00375469
CKM	636	0.602201	0.389937	0.00786164	0.64752	0.0130548	0.0201613	0.639175	1.51383	0.00792393
CKMT2	561	0.552585	0.404635	0.0427807	0.732258	0.0774194	0.105727	0.679641	1.23506	0.0446927
CLASP1	1570	0.631847	0.357962	0.0101911	0.566532	0.016129	0.0284698	0.55754	1.71626	0.010296
CLASP2	1376	0.640988	0.346657	0.0123547	0.540816	0.0192744	0.0356394	0.53059	1.78543	0.0125092
CLASRP	900	0.628889	0.351111	0.02	0.558304	0.0318021	0.056962	0.541096	1.69461	0.0204082
CLCA1	1016	0.687008	0.286417	0.0265748	0.416905	0.0386819	0.0927835	0.401379	2.19497	0.0273003
CLCA2	1109	0.660054	0.297565	0.0423805	0.45082	0.0642077	0.142424	0.42362	1.94164	0.0442561
CLCA4	990	0.718182	0.258586	0.0232323	0.360056	0.0323488	0.0898438	0.348774	2.54839	0.0237849
CLCN1	1357	0.667649	0.294768	0.0375829	0.441501	0.0562914	0.1275	0.417973	2.00887	0.0390505
CLCN2	1256	0.656847	0.318471	0.0246815	0.484848	0.0375758	0.0775	0.46729	1.91415	0.0253061
CLCN3	652	0.616564	0.371166	0.0122699	0.60199	0.0199005	0.0330579	0.590244	1.608	0.0124224
CLCN4	461	0.492408	0.507592	0	1.03084	0	0	1.03084	0.970085	0
CLCN5	509	0.664047	0.304519	0.0314342	0.45858	0.0473373	0.103226	0.437853	1.97661	0.0324544
CLCN6	975	0.637949	0.34359	0.0184615	0.538585	0.0289389	0.0537313	0.523438	1.76204	0.0188088
CLCN7	1137	0.569921	0.41073	0.0193492	0.720679	0.0339506	0.0471092	0.697015	1.32515	0.0197309
CLCNKA	978	0.643149	0.330266	0.0265849	0.513514	0.0413355	0.0804954	0.49313	1.80229	0.0273109
CLCNKB	1087	0.645814	0.323827	0.0303588	0.501425	0.0470085	0.09375	0.478912	1.82338	0.0313093
CLDN17	273	0.684982	0.282051	0.032967	0.411765	0.0481283	0.116883	0.392857	2.17442	0.0340909
CLEC14A	1491	0.642522	0.343394	0.0140845	0.534447	0.0219207	0.0410156	0.522983	1.79737	0.0142857
CLEC16A	1704	0.640845	0.346244	0.0129108	0.540293	0.0201465	0.0372881	0.529623	1.78431	0.0130797
CLEC1A	366	0.718579	0.237705	0.0437158	0.330798	0.0608365	0.183908	0.311828	2.5534	0.0457143
CLEC3A	372	0.725806	0.236559	0.0376344	0.325926	0.0518519	0.159091	0.309859	2.64706	0.0391061
CLEC4F	867	0.685121	0.28143	0.0334487	0.410774	0.0488215	0.118852	0.391653	2.17582	0.0346062
CLEC4M	524	0.614504	0.337786	0.0477099	0.549689	0.0776398	0.141243	0.510086	1.59406	0.0501002
CLGN	572	0.70979	0.243007	0.0472028	0.342365	0.0665025	0.194245	0.321016	2.44578	0.0495413
CLIC5	575	0.664348	0.309565	0.026087	0.465969	0.039267	0.0842697	0.448363	1.97927	0.0267857
CLIC6	1110	0.665766	0.311712	0.0225225	0.4682	0.0338295	0.0722543	0.45288	1.99191	0.0230415
CLINT1	597	0.696817	0.289782	0.0134003	0.415865	0.0192308	0.0462428	0.408019	2.29834	0.0135823
CLIP1	1409	0.662172	0.322924	0.0149042	0.487674	0.022508	0.0461538	0.476939	1.96008	0.0151297
CLIP2	1360	0.598529	0.391176	0.0102941	0.653563	0.017199	0.0263158	0.642512	1.49084	0.0104012
CLIP3	611	0.603928	0.386252	0.00981997	0.639566	0.0162602	0.0254237	0.629333	1.52479	0.00991736
CLIP4	784	0.6875	0.292092	0.0204082	0.424861	0.0296846	0.069869	0.412613	2.2	0.0208333
CLK1	586	0.682594	0.296928	0.0204778	0.435	0.03	0.0689655	0.42233	2.15054	0.0209059
CLK2	600	0.683333	0.305	0.0116667	0.446341	0.0170732	0.0382514	0.438849	2.15789	0.0118044
CLK3	1077	0.641597	0.342618	0.0157846	0.534009	0.024602	0.0460705	0.521186	1.79016	0.0160377
CLMN	1208	0.687086	0.288079	0.0248344	0.419277	0.0361446	0.0862069	0.404651	2.19577	0.0254669
CLN3	633	0.627172	0.334913	0.0379147	0.534005	0.0604534	0.113208	0.503563	1.6822	0.0394089
CLNK	610	0.7	0.265574	0.0344262	0.379391	0.0491803	0.12963	0.361607	2.33333	0.0356537
CLOCK	1225	0.71102	0.283265	0.00571429	0.398393	0.00803674	0.0201729	0.395216	2.46045	0.00574713
CLP	3	1	0	0	0	0		0		0
CLP1	342	0.654971	0.309942	0.0350877	0.473214	0.0535714	0.113208	0.449153	1.89831	0.0363636
CLPB	889	0.659168	0.314961	0.0258718	0.477816	0.0392491	0.0821429	0.45977	1.93399	0.0265589
CLPTM1	710	0.56338	0.421127	0.015493	0.7475	0.0275	0.0367893	0.727494	1.29032	0.0157368
CLPTM1L	788	0.612944	0.369289	0.0177665	0.602484	0.0289855	0.04811	0.585513	1.58361	0.0180879
CLPX	568	0.672535	0.315141	0.0123239	0.468586	0.0183246	0.0391061	0.460154	2.05376	0.0124777
CLSPN	1323	0.718065	0.261527	0.0204082	0.364211	0.0284211	0.0780347	0.354145	2.54692	0.0208333
CLSTN1	1202	0.648087	0.344426	0.00748752	0.531451	0.0115533	0.0217391	0.525381	1.84161	0.00754401
CLSTN2	1148	0.658537	0.329268	0.0121951	0.5	0.0185185	0.037037	0.490909	1.92857	0.0123457
CLSTN3	1338	0.671898	0.317638	0.0104634	0.472747	0.0155729	0.0329412	0.465498	2.04784	0.010574
CLTC	858	0.487179	0.494172	0.018648	1.01435	0.0382775	0.0377358	0.976959	0.95	0.0190024
CLTCL1	1956	0.68456	0.280675	0.0347648	0.410007	0.0507842	0.123862	0.390192	2.17018	0.0360169
CLU	552	0.628623	0.358696	0.0126812	0.570605	0.0201729	0.0353535	0.559322	1.69268	0.012844
CLUL1	552	0.672101	0.29529	0.0326087	0.439353	0.0485175	0.110429	0.419023	2.04972	0.0337079
CLVS1	343	0.632653	0.35277	0.0145773	0.557604	0.0230415	0.0413223	0.545045	1.72222	0.0147929
CLVS2	286	0.622378	0.36014	0.0174825	0.578652	0.0280899	0.0485437	0.562842	1.64815	0.0177936
CMIP	938	0.557569	0.438166	0.00426439	0.785851	0.00764818	0.00973236	0.779886	1.26024	0.00428266
CMKLR1	424	0.70283	0.283019	0.0141509	0.402685	0.0201342	0.05	0.394737	2.36508	0.0143541
CMYA5	4394	0.702094	0.266727	0.0311789	0.379903	0.0444084	0.116894	0.363749	2.35676	0.0321823
CNBD1	637	0.736264	0.215071	0.0486656	0.292111	0.0660981	0.226277	0.274	2.79167	0.0511551
CNDP1	639	0.679186	0.292645	0.028169	0.430876	0.0414747	0.0962567	0.413717	2.11707	0.0289855
CNDP2	616	0.667208	0.313312	0.0194805	0.469586	0.0291971	0.0621762	0.456265	2.00488	0.0198675
CNGA1	943	0.675504	0.288441	0.0360551	0.427002	0.0533752	0.125	0.405365	2.0817	0.0374037
CNGA2	628	0.679936	0.289809	0.0302548	0.42623	0.0444965	0.104396	0.408072	2.12438	0.0311987
CNGA3	964	0.681535	0.290456	0.0280083	0.42618	0.0410959	0.0964286	0.409357	2.14007	0.0288154
CNGA4	739	0.682003	0.290934	0.0270636	0.426587	0.0396825	0.0930233	0.410305	2.14468	0.0278164
CNGB1	1795	0.68078	0.293036	0.0261838	0.430442	0.0384615	0.0893536	0.4145	2.13264	0.0268879
CNGB3	1024	0.710938	0.24707	0.0419922	0.347527	0.0590659	0.16996	0.328145	2.45946	0.0438328
CNKSR1	1156	0.679931	0.290657	0.0294118	0.427481	0.043257	0.10119	0.409756	2.12432	0.030303
CNKSR2	539	0.597403	0.384045	0.0185529	0.642857	0.0310559	0.0483092	0.623494	1.48387	0.0189036
CNKSR3	717	0.641562	0.333333	0.0251046	0.519565	0.0391304	0.0753138	0.5	1.78988	0.0257511
CNNM1	1059	0.625118	0.365439	0.00944287	0.584592	0.0151057	0.0258398	0.575893	1.66751	0.00953289
CNNM2	859	0.521537	0.46915	0.00931315	0.899554	0.0178571	0.0198511	0.883772	1.09002	0.00940071
CNNM3	962	0.613306	0.367983	0.018711	0.6	0.0305085	0.0508475	0.582237	1.58602	0.0190678
CNNM4	936	0.602564	0.373932	0.0235043	0.620567	0.0390071	0.0628571	0.59727	1.51613	0.02407
CNOT1	1774	0.561443	0.434047	0.00450958	0.773092	0.00803213	0.0103896	0.766932	1.28021	0.00453001
CNOT10	723	0.709544	0.275242	0.0152144	0.387914	0.0214425	0.0552764	0.379771	2.44286	0.0154494
CNOT2	381	0.580052	0.414698	0.00524934	0.714932	0.00904977	0.0126582	0.70852	1.38125	0.00527704
CNOT3	1167	0.576692	0.414739	0.00856898	0.719168	0.0148588	0.0206612	0.708638	1.36235	0.00864304
CNOT4	600	0.61	0.383333	0.00666667	0.628415	0.010929	0.0173913	0.621622	1.5641	0.00671141
CNOT6	452	0.597345	0.387168	0.0154867	0.648148	0.0259259	0.04	0.631769	1.48352	0.0157303
CNR1	464	0.545259	0.443966	0.0107759	0.814229	0.0197628	0.0242718	0.79845	1.19905	0.0108932
CNST	1207	0.674399	0.305717	0.019884	0.453317	0.029484	0.0650407	0.440334	2.07125	0.0202874
CNTLN	2099	0.693664	0.262506	0.0438304	0.378434	0.0631868	0.166969	0.355943	2.26439	0.0458396
CNTN1	1004	0.656375	0.324701	0.0189243	0.494689	0.0288316	0.0582822	0.480826	1.91014	0.0192893
CNTN2	1367	0.651061	0.332114	0.0168252	0.510112	0.0258427	0.0506608	0.497262	1.86583	0.0171131
CNTN3	1057	0.661306	0.315043	0.0236518	0.476395	0.0357654	0.0750751	0.459945	1.95251	0.0242248
CNTN4	1197	0.654135	0.32665	0.0192147	0.499361	0.0293742	0.0588235	0.485112	1.8913	0.0195911
CNTN5	1443	0.713098	0.272349	0.014553	0.381924	0.0204082	0.0534351	0.374286	2.48551	0.0147679
CNTN6	1599	0.697311	0.266417	0.0362727	0.382063	0.0520179	0.13615	0.363171	2.30372	0.0376379
CNTNAP1	1857	0.515347	0.458805	0.0258481	0.890282	0.0501567	0.056338	0.847761	1.06333	0.026534
CNTNAP2	1731	0.686886	0.29405	0.0190641	0.428091	0.0277544	0.064833	0.41653	2.19373	0.0194346
CNTNAP3	1519	0.657011	0.317314	0.0256748	0.482966	0.0390782	0.0809129	0.464802	1.91555	0.0263514
CNTNAP3B	1794	0.691193	0.273133	0.0356745	0.395161	0.0516129	0.130612	0.375767	2.23827	0.0369942
CNTNAP4	1737	0.693725	0.28958	0.0166955	0.417427	0.0240664	0.0576541	0.407618	2.26504	0.0169789
CNTNAP5	1594	0.666876	0.314304	0.0188206	0.471308	0.028222	0.0598802	0.458371	2.00188	0.0191816
CNTRL	2368	0.697213	0.260557	0.0422297	0.373713	0.0605694	0.162075	0.35237	2.30265	0.0440917
CNTROB	1718	0.673458	0.306752	0.0197905	0.455488	0.0293863	0.0645161	0.442485	2.06239	0.02019
CO1	4	1	0	0	0	0		0		0
COASY	941	0.672689	0.30712	0.0201913	0.456556	0.0300158	0.0657439	0.443252	2.05519	0.0206074
COBL	1881	0.682616	0.307815	0.00956938	0.450935	0.0140187	0.0310881	0.4447	2.15075	0.00966184
COBLL1	1352	0.732988	0.252959	0.0140533	0.345106	0.0191726	0.0555556	0.338614	2.74515	0.0142536
COCH	667	0.676162	0.296852	0.0269865	0.439024	0.0399113	0.0909091	0.422175	2.08796	0.027735
COG	6	1	0	0	0	0		0		0
COG1	1252	0.677316	0.297923	0.0247604	0.439858	0.0365566	0.0831099	0.424346	2.09901	0.025389
COG2	760	0.681579	0.307895	0.0105263	0.451737	0.015444	0.034188	0.444867	2.1405	0.0106383
COG3	763	0.663172	0.326343	0.0104849	0.492095	0.0158103	0.0321285	0.484436	1.96887	0.010596
COG4	1132	0.669611	0.312721	0.0176678	0.467018	0.0263852	0.0564972	0.455013	2.02674	0.0179856
COG5	1830	0.691257	0.285246	0.0234973	0.412648	0.0339921	0.0823755	0.399083	2.23894	0.0240627
COG6	841	0.707491	0.259215	0.0332937	0.366387	0.0470588	0.12844	0.34992	2.4187	0.0344403
COG7	813	0.667897	0.314883	0.0172202	0.471455	0.0257827	0.0546875	0.459605	2.01111	0.0175219
COG8	2321	0.617406	0.364929	0.0176648	0.591068	0.0286113	0.0484061	0.574627	1.61374	0.0179825
COIL	615	0.702439	0.282927	0.0146341	0.402778	0.0208333	0.0517241	0.394558	2.36066	0.0148515
COL10A1	1528	0.70288	0.28534	0.0117801	0.405959	0.0167598	0.0412844	0.399267	2.36564	0.0119205
COL11A1	2158	0.699259	0.287766	0.012975	0.411531	0.0185553	0.0450886	0.404034	2.32512	0.0131455
COL11A2	2234	0.654432	0.324978	0.0205909	0.49658	0.0314637	0.0633609	0.481432	1.89378	0.0210238
COL12A1	3319	0.687858	0.299187	0.0129557	0.434954	0.0188349	0.0433031	0.426913	2.20367	0.0131258
COL13A1	955	0.635602	0.348691	0.0157068	0.5486	0.0247117	0.045045	0.53537	1.74425	0.0159574
COL14A1	1887	0.666137	0.312666	0.0211977	0.469372	0.0318218	0.0677966	0.454896	1.99524	0.0216567
COL15A1	1754	0.698404	0.293044	0.00855188	0.419592	0.0122449	0.0291829	0.414516	2.31569	0.00862565
COL16A1	1980	0.667677	0.310606	0.0217172	0.465204	0.0325265	0.0699187	0.450549	2.00912	0.0221993
COL17A1	1987	0.693508	0.285858	0.0206341	0.412192	0.0297533	0.0721831	0.400282	2.26273	0.0210689
COL18A1	3827	0.62451	0.365038	0.0104521	0.584519	0.0167364	0.0286328	0.574897	1.66319	0.0105625
COL19A1	1338	0.687593	0.292975	0.019432	0.426087	0.0282609	0.0663265	0.414376	2.20096	0.0198171
COL1A1	2156	0.670686	0.306122	0.0231911	0.456432	0.0345781	0.0757576	0.441176	2.03662	0.0237417
COL1A2	1962	0.707951	0.287462	0.00458716	0.406048	0.00647948	0.0159574	0.403433	2.42408	0.00460829
COL20A1	2290	0.636681	0.332314	0.0310044	0.521948	0.0486968	0.0932983	0.497711	1.7524	0.0319964
COL21A1	1160	0.665517	0.29569	0.0387931	0.444301	0.0582902	0.131195	0.419829	1.98969	0.0403587
COL22A1	2241	0.686747	0.294065	0.0191879	0.4282	0.0279402	0.0652504	0.416561	2.19231	0.0195632
COL23A1	801	0.639201	0.342072	0.0187266	0.535156	0.0292969	0.0547445	0.519924	1.77163	0.019084
COL24A1	2001	0.716142	0.254373	0.0294853	0.355199	0.0411724	0.115914	0.341153	2.52289	0.0303811
COL25A1	748	0.668449	0.314171	0.0173797	0.47	0.026	0.0553191	0.45809	2.01613	0.0176871
COL27A1	2572	0.671073	0.318818	0.0101089	0.475087	0.0150637	0.0317073	0.468037	2.04019	0.0102121
COL28A1	1549	0.722402	0.253712	0.0238864	0.351206	0.0330652	0.0941476	0.339965	2.60233	0.0244709
COL2A1	1780	0.64382	0.33764	0.0185393	0.524433	0.0287958	0.0549085	0.509754	1.80757	0.0188895
COL3A1	1947	0.678993	0.305085	0.0159219	0.449319	0.0234493	0.0521886	0.439024	2.1152	0.0161795
COL4A1	1833	0.624659	0.372068	0.00327332	0.595633	0.00524017	0.00879765	0.592528	1.66424	0.00328407
COL4A2	2424	0.645215	0.332921	0.0218647	0.515985	0.0338875	0.0656753	0.499072	1.8186	0.0223534
COL4A3	1842	0.699783	0.28013	0.0200869	0.40031	0.0287044	0.0717054	0.38914	2.33092	0.0204986
COL4A4	2259	0.682603	0.298805	0.0185923	0.437743	0.0272374	0.0622222	0.426136	2.15063	0.0189445
COL4A5	1676	0.73926	0.22136	0.0393795	0.299435	0.0532688	0.177898	0.284291	2.83524	0.0409938
COL4A6	1332	0.666667	0.320571	0.0127628	0.480856	0.0191441	0.0398126	0.471823	2	0.0129278
COL5A1	2468	0.635737	0.350486	0.0137763	0.551307	0.0216699	0.0393064	0.539613	1.74527	0.0139688
COL5A2	1572	0.69084	0.308524	0.000636132	0.446593	0.00092081	0.00206186	0.446182	2.23457	0.000636537
COL5A3	2328	0.669674	0.313574	0.0167526	0.468249	0.025016	0.0534247	0.456821	2.02731	0.017038
COL6A1	1638	0.6337	0.355311	0.010989	0.560694	0.017341	0.0309278	0.551136	1.73	0.0111111
COL6A2	2179	0.631941	0.349702	0.018357	0.553377	0.0290487	0.0524934	0.537756	1.71696	0.0187003
COL6A3	4230	0.687943	0.297636	0.0144208	0.432646	0.0209622	0.0484512	0.423763	2.20455	0.0146318
COL6A5	2708	0.703102	0.263663	0.0332349	0.375	0.0472689	0.12605	0.358074	2.36816	0.0343774
COL6A6	2571	0.716842	0.256709	0.0264489	0.358112	0.0368964	0.10303	0.345369	2.53159	0.0271674
COL7A1	3650	0.673699	0.30274	0.0235616	0.44937	0.0349736	0.0778281	0.434185	2.06465	0.0241302
COL8A1	788	0.666244	0.319797	0.0139594	0.48	0.0209524	0.0436508	0.470149	1.9962	0.014157
COL8A2	966	0.612836	0.372671	0.0144928	0.608108	0.0236486	0.0388889	0.594059	1.58289	0.0147059
COL9A1	1243	0.659694	0.312953	0.0273532	0.47439	0.0414634	0.0874036	0.455504	1.93853	0.0281224
COL9A2	975	0.672821	0.309744	0.0174359	0.460366	0.0259146	0.0562914	0.448737	2.05643	0.0177453
COL9A3	1365	0.645421	0.339927	0.014652	0.526674	0.0227015	0.0431034	0.514983	1.82025	0.0148699
COLA1	7	1	0	0	0	0		0		0
COLA2	4	1	0	0	0	0		0		0
COLA3	3	1	0	0	0	0		0		0
COLEC1	1	1	0	0	0	0		0		0
COLEC10	320	0.70625	0.278125	0.015625	0.393805	0.0221239	0.0561798	0.385281	2.40426	0.015873
COLEC11	678	0.612094	0.379056	0.00884956	0.619277	0.0144578	0.0233463	0.610451	1.57795	0.00892857
COLEC12	774	0.647287	0.339793	0.0129199	0.52495	0.0199601	0.0380228	0.514677	1.83516	0.013089
COLQ	623	0.698234	0.269663	0.0321027	0.386207	0.045977	0.119048	0.369231	2.31383	0.0331675
COMP	1009	0.666997	0.305253	0.0277502	0.457652	0.0416048	0.0909091	0.439372	2.00298	0.0285423
COPA	1048	0.668893	0.329198	0.0019084	0.492154	0.00285307	0.0057971	0.490754	2.02017	0.00191205
COPB1	776	0.679124	0.315722	0.00515464	0.464896	0.00759013	0.0163265	0.461394	2.11647	0.00518135
COPB2	862	0.653132	0.336427	0.0104408	0.515098	0.0159858	0.0310345	0.506993	1.88294	0.010551
COPS2	213	0.488263	0.507042	0.00469484	1.03846	0.00961538	0.00925926	1.02857	0.954128	0.00471698
Corf131	1	1	0	0	0	0		0		0
Corf43	2	1	0	0	0	0		0		0
CORIN	1346	0.697623	0.263001	0.0393759	0.376997	0.056443	0.149718	0.356855	2.30713	0.0409899
CORO1A	571	0.583187	0.406305	0.0105079	0.696697	0.018018	0.0258621	0.684366	1.39916	0.0106195
CORO1B	1560	0.647436	0.34359	0.00897436	0.530693	0.0138614	0.0261194	0.523438	1.83636	0.00905563
CORO1C	476	0.64916	0.340336	0.0105042	0.524272	0.0161812	0.0308642	0.515924	1.8503	0.0106157
CORO2A	628	0.651274	0.320064	0.0286624	0.491443	0.0440098	0.0895522	0.470726	1.86758	0.0295082
CORO2B	488	0.637295	0.35041	0.0122951	0.549839	0.0192926	0.0350877	0.539432	1.75706	0.0124481
CORO6	805	0.693168	0.280745	0.026087	0.405018	0.0376344	0.0929204	0.390328	2.25911	0.0267857
CORO7	2473	0.646583	0.334412	0.0190053	0.517198	0.0293934	0.0568319	0.50243	1.82952	0.0193735
COX10	622	0.659164	0.324759	0.0160772	0.492683	0.0243902	0.049505	0.480952	1.93396	0.0163399
CP	1244	0.676849	0.299035	0.0241158	0.441805	0.0356295	0.0806452	0.426606	2.09453	0.0247117
CPA1	510	0.645098	0.321569	0.0333333	0.49848	0.0516717	0.103659	0.473988	1.81768	0.0344828
CPA2	486	0.693416	0.273663	0.0329218	0.394659	0.0474777	0.120301	0.376771	2.26174	0.0340426
CPA3	529	0.733459	0.226843	0.0396975	0.309278	0.0541237	0.175	0.293399	2.75177	0.0413386
CPA4	513	0.645224	0.309942	0.0448343	0.480363	0.0694864	0.144654	0.449153	1.81868	0.0469388
CPA5	623	0.645265	0.324238	0.0304976	0.502488	0.0472637	0.0940594	0.47981	1.819	0.031457
CPA6	553	0.717902	0.235081	0.0470163	0.327456	0.0654912	0.2	0.307329	2.54487	0.0493359
CPAMD	8	1	0	0	0	0		0		0
CPAMD8	2669	0.662046	0.317347	0.020607	0.479344	0.0311262	0.0649351	0.464874	1.95898	0.0210406
CPB1	481	0.694387	0.259875	0.045738	0.374251	0.0658683	0.176	0.351124	2.27211	0.0479303
CPB2	444	0.612613	0.353604	0.0337838	0.577206	0.0551471	0.0955414	0.547038	1.5814	0.034965
CPD	1262	0.670365	0.316957	0.0126783	0.472813	0.0189125	0.04	0.464037	2.03365	0.0128411
CPE	469	0.667377	0.319829	0.0127932	0.479233	0.0191693	0.04	0.470219	2.00641	0.012959
CPEB2	1416	0.64548	0.33404	0.0204802	0.517505	0.0317287	0.0613108	0.501591	1.82072	0.0209084
CPEB3	804	0.636816	0.349502	0.0136816	0.548828	0.0214844	0.0391459	0.537285	1.75342	0.0138714
CPEB4	577	0.627383	0.363951	0.00866551	0.58011	0.0138122	0.0238095	0.572207	1.68372	0.00874126
CPED1	1251	0.685052	0.282174	0.0327738	0.411902	0.0478413	0.116147	0.393096	2.17513	0.0338843
CPN1	582	0.646048	0.328179	0.0257732	0.507979	0.0398936	0.078534	0.488491	1.82524	0.026455
CPN2	704	0.615057	0.362216	0.0227273	0.588915	0.0369515	0.0627451	0.567929	1.59779	0.0232558
CPNE	2	1	0	0	0	0		0		0
CPNE1	636	0.699686	0.275157	0.0251572	0.393258	0.0359551	0.0914286	0.37961	2.32984	0.0258065
CPNE2	637	0.623234	0.357928	0.0188383	0.574307	0.0302267	0.0526316	0.557457	1.65417	0.0192
CPNE3	639	0.70579	0.250391	0.0438185	0.354767	0.0620843	0.175	0.334029	2.39894	0.0458265
CPNE4	559	0.62254	0.364937	0.0125224	0.586207	0.0201149	0.0343137	0.574648	1.64929	0.0126812
CPNE5	830	0.60241	0.373494	0.0240964	0.62	0.04	0.0645161	0.596154	1.51515	0.0246914
CPNE6	830	0.512048	0.46747	0.0204819	0.912941	0.04	0.0438144	0.877828	1.04938	0.0209102
CPNE7	1250	0.624	0.3488	0.0272	0.558974	0.0435897	0.0779817	0.535627	1.65957	0.0279605
CPNE8	537	0.648045	0.337058	0.0148976	0.520115	0.0229885	0.0441989	0.508427	1.84127	0.0151229
CPNE9	727	0.638239	0.34663	0.0151307	0.543103	0.0237069	0.0436508	0.530526	1.76426	0.0153631
CPS1	1866	0.642015	0.338692	0.0192926	0.527546	0.0300501	0.056962	0.512156	1.79341	0.0196721
CPSF2	561	0.631016	0.336898	0.0320856	0.533898	0.0508475	0.0952381	0.508065	1.71014	0.0331492
CPSF3	561	0.613191	0.363636	0.0231729	0.593023	0.0377907	0.0637255	0.571429	1.58525	0.0237226
CPSF6	418	0.538278	0.461722	0	0.857778	0	0	0.857778	1.1658	0
CPT1A	921	0.64278	0.322476	0.0347448	0.501689	0.0540541	0.107744	0.475962	1.79939	0.0359955
CPT1B	1086	0.617864	0.354512	0.0276243	0.57377	0.0447094	0.0779221	0.549215	1.61687	0.0284091
CPT1C	1196	0.648829	0.331104	0.0200669	0.510309	0.0309278	0.0606061	0.495	1.84762	0.0204778
CPVL	556	0.703237	0.267986	0.028777	0.381074	0.0409207	0.107383	0.366093	2.3697	0.0296296
CPXCR1	242	0.727273	0.227273	0.0454545	0.3125	0.0625	0.2	0.294118	2.66667	0.047619
CPXM1	896	0.652902	0.323661	0.0234375	0.495726	0.0358974	0.0724138	0.478548	1.88103	0.024
CPXM2	1032	0.686047	0.284884	0.0290698	0.415254	0.0423729	0.102041	0.398374	2.18519	0.0299401
CPZ	1609	0.66128	0.307023	0.0316967	0.464286	0.0479323	0.103239	0.443049	1.95229	0.0327343
CR1	2194	0.695077	0.283956	0.0209663	0.408525	0.0301639	0.0738363	0.396563	2.27952	0.0214153
CR1L	742	0.672507	0.285714	0.041779	0.42485	0.0621242	0.146226	0.4	2.0535	0.0436006
CR2	1215	0.687243	0.283128	0.0296296	0.411976	0.0431138	0.104651	0.394948	2.19737	0.0305344
CRAT	911	0.639956	0.339188	0.0208562	0.530017	0.0325901	0.0614887	0.513289	1.77744	0.0213004
CRB1	1807	0.704483	0.264527	0.0309906	0.375491	0.0439906	0.117155	0.359669	2.3839	0.0319817
CRB2	1934	0.649431	0.330403	0.0201655	0.508758	0.031051	0.0610329	0.493436	1.85251	0.0205805
CREB3L1	680	0.65	0.338235	0.0117647	0.520362	0.0180995	0.0347826	0.511111	1.85714	0.0119048
CREB3L2	679	0.689249	0.297496	0.0132548	0.431624	0.0192308	0.0445545	0.42348	2.21801	0.0134328
CREB3L3	663	0.625943	0.339367	0.0346908	0.542169	0.0554217	0.102222	0.513699	1.67339	0.0359375
CREB5	959	0.672576	0.311783	0.0156413	0.463566	0.0232558	0.0501672	0.45303	2.05414	0.0158898
CREBBP	2867	0.593652	0.381932	0.0244158	0.643361	0.0411281	0.0639269	0.617946	1.46094	0.0250268
CRHBP	340	0.682353	0.308824	0.00882353	0.452586	0.012931	0.0285714	0.446809	2.14815	0.00890208
CRHR1	523	0.625239	0.344168	0.0305927	0.550459	0.0489297	0.0888889	0.524781	1.66837	0.0315582
CRHR2	629	0.664547	0.294118	0.0413355	0.442584	0.062201	0.140541	0.416667	1.98104	0.0431177
CRIM1	1338	0.661435	0.328102	0.0104634	0.496045	0.0158192	0.0318907	0.48832	1.95364	0.010574
CRISP1	362	0.70442	0.254144	0.0414365	0.360784	0.0588235	0.163043	0.340741	2.38318	0.0432277
CRISP2	348	0.70977	0.244253	0.045977	0.34413	0.0647773	0.188235	0.323194	2.44554	0.0481928
CRISP3	365	0.69589	0.276712	0.0273973	0.397638	0.0393701	0.0990099	0.382576	2.28829	0.028169
CRISPLD1	540	0.727778	0.240741	0.0314815	0.330789	0.043257	0.130769	0.317073	2.67347	0.0325048
CRISPLD2	832	0.675481	0.302885	0.0216346	0.448399	0.0320285	0.0714286	0.434483	2.08148	0.022113
CRLF2	475	0.64	0.311579	0.0484211	0.486842	0.0756579	0.155405	0.452599	1.77778	0.050885
CRMP1	633	0.579779	0.412322	0.00789889	0.711172	0.013624	0.0191571	0.701613	1.3797	0.00796178
CRNKL1	1390	0.667626	0.311511	0.0208633	0.466595	0.03125	0.0669746	0.452456	2.00866	0.0213079
CRNN	618	0.669903	0.281553	0.0485437	0.42029	0.0724638	0.172414	0.391892	2.02941	0.0510204
CROCC	3547	0.664787	0.309839	0.0253736	0.466073	0.0381679	0.0818926	0.448938	1.98318	0.0260341
CROT	674	0.716617	0.235905	0.0474777	0.329193	0.0662526	0.201258	0.308738	2.5288	0.0498442
CRP	288	0.645833	0.315972	0.0381944	0.489247	0.0591398	0.120879	0.461929	1.82353	0.0397112
CRTAC1	1334	0.661169	0.329085	0.00974513	0.497732	0.0147392	0.0296128	0.490503	1.95133	0.00984103
CRTAM	439	0.685649	0.284738	0.0296128	0.415282	0.0431894	0.104	0.398089	2.18116	0.0305164
CRTC1	919	0.57889	0.415669	0.0054407	0.718045	0.0093985	0.013089	0.711359	1.37468	0.00547046
CRTC2	1366	0.664714	0.324305	0.010981	0.487885	0.0165198	0.03386	0.479957	1.98253	0.0111029
CRTC3	771	0.640726	0.342412	0.0168612	0.534413	0.0263158	0.0492424	0.52071	1.78339	0.0171504
CRX	393	0.631043	0.351145	0.0178117	0.556452	0.0282258	0.0507246	0.541176	1.71034	0.0181347
CRY1	627	0.639553	0.325359	0.0350877	0.508728	0.0548628	0.107843	0.48227	1.77434	0.0363636
CRY2	626	0.626198	0.354633	0.0191693	0.566327	0.0306122	0.0540541	0.549505	1.67521	0.019544
CRYBB1	318	0.650943	0.31761	0.0314465	0.487923	0.0483092	0.0990099	0.465438	1.86486	0.0324675
CRYBG3	2847	0.733404	0.249385	0.0172111	0.340038	0.0234674	0.0690141	0.332241	2.75099	0.0175125
CS	313	0.619808	0.361022	0.0191693	0.582474	0.0309278	0.0530973	0.565	1.63025	0.019544
CSAD	803	0.665006	0.307597	0.0273973	0.462547	0.0411985	0.0890688	0.444245	1.98513	0.028169
CSDE1	580	0.627586	0.367241	0.00517241	0.585165	0.00824176	0.0140845	0.580381	1.68519	0.00519931
CSE1L	801	0.626717	0.36829	0.00499376	0.587649	0.00796813	0.0135593	0.583004	1.67893	0.00501882
CSF1	695	0.667626	0.326619	0.0057554	0.489224	0.00862069	0.0176211	0.485043	2.00866	0.00578871
CSF1R	1133	0.62842	0.352162	0.0194175	0.560393	0.0308989	0.0551378	0.543597	1.69121	0.019802
CSF2RA	740	0.666216	0.309459	0.0243243	0.464503	0.0365112	0.0786026	0.448141	1.99595	0.0249307
CSF2RB	1252	0.640575	0.34345	0.0159744	0.53616	0.0249377	0.0465116	0.523114	1.78222	0.0162338
CSF3R	1035	0.65314	0.325604	0.021256	0.498521	0.0325444	0.0652819	0.482808	1.88301	0.0217177
CSGALNACT1	952	0.696429	0.277311	0.0262605	0.39819	0.0377074	0.094697	0.383721	2.29412	0.0269687
CSGALNACT2	582	0.67354	0.302405	0.024055	0.44898	0.0357143	0.0795455	0.433498	2.06316	0.0246479
CSK	374	0.489305	0.502674	0.00802139	1.02732	0.0163934	0.0159574	1.01075	0.958115	0.00808625
CSMD1	7332	0.665303	0.326378	0.00831969	0.49057	0.0125051	0.025491	0.484511	1.98778	0.00838949
CSMD2	4421	0.647139	0.340195	0.0126668	0.52569	0.0195736	0.037234	0.515598	1.83397	0.0128293
CSMD3	3955	0.692288	0.29153	0.016182	0.42111	0.0233747	0.0555074	0.411492	2.24979	0.0164482
CSNK1A1	111	0.423423	0.576577	0	1.3617	0	0	1.3617	0.734375	0
CSNK1A1L	422	0.670616	0.296209	0.0331754	0.441696	0.04947	0.112	0.420875	2.03597	0.0343137
CSNK1G2	642	0.565421	0.425234	0.00934579	0.752066	0.0165289	0.021978	0.739837	1.30108	0.00943396
CSNK2A1	277	0.555957	0.418773	0.0252708	0.753247	0.0454545	0.0603448	0.720497	1.25203	0.0259259
CSPG4	2942	0.654657	0.328688	0.0166553	0.502077	0.0254413	0.0506722	0.48962	1.89567	0.0169374
CSPG5	655	0.661069	0.334351	0.00458015	0.505774	0.00692841	0.0136986	0.502294	1.95045	0.00460123
CSPP1	1722	0.716609	0.24971	0.0336818	0.34846	0.0470016	0.134884	0.332817	2.52869	0.0348558
CSRNP1	770	0.663636	0.328571	0.00779221	0.495108	0.0117417	0.0237154	0.489362	1.97297	0.0078534
CSRNP2	885	0.662147	0.333333	0.00451977	0.503413	0.00682594	0.0135593	0.5	1.95987	0.0045403
CSRNP3	626	0.664537	0.316294	0.0191693	0.475962	0.0288462	0.0606061	0.462617	1.98095	0.019544
CSTF1	322	0.487578	0.506211	0.00621118	1.03822	0.0127389	0.0122699	1.02516	0.951515	0.00625
CSTF2	298	0.604027	0.38255	0.0134228	0.633333	0.0222222	0.0350877	0.619565	1.52542	0.0136054
CSTF3	408	0.546569	0.426471	0.0269608	0.780269	0.0493274	0.0632184	0.74359	1.20541	0.0277078
CT47B1	663	0.683258	0.291101	0.025641	0.426049	0.0375276	0.0880829	0.410638	2.15714	0.0263158
CTAGE1	974	0.734086	0.247433	0.0184805	0.337063	0.0251748	0.0746888	0.328786	2.76062	0.0188285
CTBP1	480	0.508333	0.479167	0.0125	0.942623	0.0245902	0.026087	0.92	1.0339	0.0126582
CTBP2	1788	0.641499	0.337248	0.0212528	0.525719	0.0331299	0.0630182	0.508861	1.78939	0.0217143
CTC1	1493	0.662425	0.311453	0.0261219	0.470172	0.0394338	0.083871	0.452335	1.9623	0.0268226
CTCF	548	0.54562	0.443431	0.0109489	0.812709	0.0200669	0.0246914	0.796721	1.2008	0.0110701
CTCFL	1033	0.663117	0.312682	0.0242014	0.471533	0.0364964	0.0773994	0.45493	1.96839	0.0248016
CTDP1	1687	0.627742	0.346769	0.025489	0.552408	0.0406043	0.0735043	0.530853	1.68631	0.0261557
CTIF	798	0.645363	0.343358	0.0112782	0.532039	0.0174757	0.0328467	0.522901	1.81979	0.0114068
CTNNA1	955	0.586387	0.394764	0.0188482	0.673214	0.0321429	0.0477454	0.652249	1.41772	0.0192102
CTNNA2	968	0.597107	0.373967	0.0289256	0.626298	0.0484429	0.0773481	0.59736	1.48205	0.0297872
CTNNA3	1211	0.730801	0.251032	0.0181668	0.343503	0.0248588	0.0723684	0.335171	2.71472	0.0185029
CTNNAL1	959	0.709072	0.266945	0.0239833	0.376471	0.0338235	0.0898438	0.364154	2.43728	0.0245726
CTNNB1	719	0.628651	0.336579	0.0347705	0.535398	0.0553097	0.103306	0.507338	1.69288	0.0360231
CTNNBL1	537	0.648045	0.335196	0.0167598	0.517241	0.0258621	0.05	0.504202	1.84127	0.0170455
CTNND1	951	0.709779	0.28286	0.00736067	0.398519	0.0103704	0.0260223	0.394428	2.44565	0.00741525
CTNND2	1420	0.619718	0.371831	0.0084507	0.6	0.0136364	0.0227273	0.591928	1.62963	0.00852273
CTPS2	415	0.621687	0.368675	0.00963855	0.593023	0.0155039	0.0261438	0.583969	1.64331	0.00973236
CTR9	899	0.579533	0.403782	0.0166852	0.696737	0.0287908	0.0413223	0.677239	1.37831	0.0169683
CTSA	1644	0.666667	0.322384	0.0109489	0.483577	0.0164234	0.0339623	0.475763	2	0.0110701
CTSC	646	0.681115	0.289474	0.0294118	0.425	0.0431818	0.101604	0.407407	2.13592	0.030303
CTSD	549	0.601093	0.386157	0.0127505	0.642424	0.0212121	0.0330189	0.62908	1.50685	0.0129151
CTSE	568	0.649648	0.315141	0.0352113	0.485095	0.0542005	0.111732	0.460154	1.85427	0.0364964
CTSG	319	0.648903	0.322884	0.0282132	0.497585	0.0434783	0.0873786	0.476852	1.84821	0.0290323
CTTN	895	0.650279	0.32514	0.024581	0.5	0.0378007	0.0756014	0.481788	1.85942	0.0252005
CTTNBP2	1833	0.698854	0.284779	0.0163666	0.407494	0.0234192	0.0574713	0.398169	2.32065	0.0166389
CTTNBP2NL	657	0.684932	0.299848	0.0152207	0.437778	0.0222222	0.0507614	0.428261	2.17391	0.015456
CTU2	1766	0.636467	0.333522	0.0300113	0.524021	0.047153	0.089983	0.500425	1.75078	0.0309399
CUBN	4417	0.693004	0.282998	0.0239982	0.408363	0.0346292	0.0848	0.394695	2.25737	0.0245883
CUL1	444	0.448198	0.538288	0.0135135	1.20101	0.0301508	0.0251046	1.16585	0.812245	0.0136986
CUL2	593	0.627319	0.36425	0.0084317	0.580645	0.0134409	0.0231481	0.572944	1.68326	0.0085034
CUL3	561	0.536542	0.452763	0.0106952	0.843854	0.0199336	0.023622	0.827362	1.15769	0.0108108
CUL4A	869	0.611047	0.386651	0.0023015	0.632768	0.00376648	0.00595238	0.630394	1.57101	0.00230681
CUL4B	443	0.546275	0.437923	0.0158014	0.801653	0.0289256	0.0360825	0.779116	1.20398	0.016055
CUL5	513	0.510721	0.469786	0.0194932	0.919847	0.0381679	0.0414938	0.886029	1.04382	0.0198807
CUL7	2531	0.667325	0.309759	0.0229158	0.46418	0.0343398	0.0739796	0.448769	2.00594	0.0234533
CUL9	2627	0.656643	0.328892	0.0144652	0.50087	0.022029	0.0439815	0.490074	1.91242	0.0146775
CUX1	2188	0.60649	0.382998	0.0105119	0.6315	0.0173323	0.0274463	0.620741	1.54123	0.0106236
CUX2	1788	0.633669	0.358501	0.00782998	0.565755	0.0123566	0.0218409	0.558849	1.72977	0.00789177
CUZD1	626	0.694888	0.271565	0.0335463	0.390805	0.0482759	0.123529	0.372807	2.27749	0.0347107
CWC22	872	0.697248	0.27867	0.0240826	0.399671	0.0345395	0.0864198	0.386328	2.30303	0.0246769
CWF19L2	1028	0.743191	0.228599	0.0282101	0.307592	0.0379581	0.123404	0.296343	2.89394	0.029029
CWH43	855	0.683041	0.281871	0.0350877	0.412671	0.0513699	0.124481	0.392508	2.15498	0.0363636
CX3CR1	425	0.644706	0.341176	0.0141176	0.529197	0.0218978	0.0413793	0.517857	1.81457	0.0143198
CXCR1	482	0.672199	0.30083	0.026971	0.447531	0.0401235	0.0896552	0.430267	2.05063	0.0277186
CXCR2	467	0.608137	0.374732	0.0171306	0.616197	0.028169	0.0457143	0.599315	1.55191	0.0174292
CXCR4	339	0.631268	0.339233	0.0294985	0.537383	0.046729	0.0869565	0.513393	1.712	0.0303951
CXorf66	288	0.704861	0.263889	0.03125	0.374384	0.044335	0.118421	0.358491	2.38824	0.0322581
CXXC1	552	0.608696	0.375	0.0163043	0.616071	0.0267857	0.0434783	0.6	1.55556	0.0165746
CYB5R4	520	0.696154	0.278846	0.025	0.400552	0.0359116	0.0896552	0.386667	2.29114	0.025641
CYBB	429	0.629371	0.321678	0.048951	0.511111	0.0777778	0.152174	0.474227	1.69811	0.0514706
CYFIP2	1279	0.544175	0.440188	0.0156372	0.808908	0.0287356	0.035524	0.786313	1.19383	0.0158856
CYLC1	548	0.737226	0.257299	0.00547445	0.34901	0.00742574	0.0212766	0.346437	2.80556	0.00550459
CYLC2	476	0.760504	0.207983	0.0315126	0.273481	0.0414365	0.151515	0.262599	3.17544	0.032538
CYLD	714	0.62605	0.357143	0.0168067	0.57047	0.0268456	0.0470588	0.555556	1.67416	0.017094
CYP11A1	585	0.673504	0.302564	0.0239316	0.449239	0.035533	0.079096	0.433824	2.06283	0.0245184
CYP11B1	836	0.65311	0.322967	0.0239234	0.494505	0.03663	0.0740741	0.477032	1.88276	0.0245098
CYP11B2	752	0.643617	0.329787	0.0265957	0.512397	0.0413223	0.0806452	0.492063	1.80597	0.0273224
CYP17A1	552	0.628623	0.347826	0.0235507	0.553314	0.037464	0.0677083	0.533333	1.69268	0.0241187
CYP19A1	583	0.684391	0.28988	0.025729	0.423559	0.037594	0.0887574	0.408213	2.16848	0.0264085
CYP1A1	727	0.719395	0.25447	0.0261348	0.353728	0.0363289	0.102703	0.341328	2.56373	0.0268362
CYP1A2	689	0.674891	0.298984	0.0261248	0.443011	0.0387097	0.0873786	0.426501	2.07589	0.0268256
CYP1B1	958	0.682672	0.292276	0.0250522	0.428135	0.0366972	0.0857143	0.412979	2.15132	0.0256959
CYP24A1	716	0.684358	0.269553	0.0460894	0.393878	0.0673469	0.170984	0.369025	2.16814	0.0483163
CYP26A1	649	0.651772	0.317411	0.0308166	0.486998	0.0472813	0.0970874	0.465011	1.87168	0.0317965
CYP26B1	680	0.636765	0.357353	0.00588235	0.561201	0.00923788	0.0164609	0.556064	1.75304	0.00591716
CYP26C1	779	0.671374	0.306804	0.0218228	0.456979	0.0325048	0.0711297	0.442593	2.04297	0.0223097
CYP27A1	762	0.656168	0.295276	0.0485564	0.45	0.074	0.164444	0.418994	1.9084	0.0510345
CYP27C1	540	0.675926	0.305556	0.0185185	0.452055	0.0273973	0.0606061	0.44	2.08571	0.0188679
CYP2A13	779	0.684211	0.291399	0.0243902	0.425891	0.0356473	0.0837004	0.411232	2.16667	0.025
CYP2A6	867	0.666667	0.316032	0.017301	0.474048	0.0259516	0.0547445	0.462057	2	0.0176056
CYP2A7	893	0.680851	0.298992	0.0201568	0.439145	0.0296053	0.0674157	0.426518	2.13333	0.0205714
CYP2B6	716	0.681564	0.297486	0.0209497	0.436475	0.0307377	0.0704225	0.423459	2.14035	0.021398
CYP2C18	631	0.697306	0.275753	0.0269414	0.395455	0.0386364	0.0977011	0.380744	2.30366	0.0276873
CYP2C19	803	0.688667	0.28269	0.0286426	0.410488	0.0415913	0.101322	0.394097	2.212	0.0294872
CYP2C8	648	0.71142	0.246914	0.0416667	0.347072	0.0585683	0.16875	0.327869	2.46524	0.0434783
CYP2C9	792	0.710859	0.271465	0.0176768	0.381883	0.0248668	0.0651163	0.372617	2.45852	0.0179949
CYP2D6	1127	0.664596	0.305235	0.0301686	0.459279	0.0453939	0.0988372	0.439336	1.98148	0.031107
CYP2E1	596	0.65604	0.322148	0.0218121	0.491049	0.0332481	0.0677083	0.475248	1.90732	0.0222985
CYP2F1	879	0.679181	0.299204	0.0216155	0.440536	0.0318258	0.0722433	0.426948	2.11702	0.022093
CYP2S1	628	0.646497	0.335987	0.0175159	0.519704	0.0270936	0.0521327	0.505995	1.82883	0.0178282
CYP2W1	1849	0.646836	0.343429	0.00973499	0.530936	0.0150502	0.0283465	0.523064	1.83155	0.00983069
CYP39A1	751	0.683089	0.286285	0.0306258	0.419103	0.0448343	0.106977	0.401119	2.15546	0.0315934
CYP3A4	601	0.74376	0.234609	0.0216306	0.315436	0.0290828	0.0921986	0.306522	2.9026	0.0221088
CYP3A43	593	0.699831	0.273187	0.0269815	0.390361	0.0385542	0.0987654	0.37587	2.33146	0.0277296
CYP3A5	1070	0.702804	0.271028	0.0261682	0.385638	0.037234	0.0965517	0.371795	2.36478	0.0268714
CYP3A7	1126	0.715808	0.269982	0.0142096	0.377171	0.0198511	0.0526316	0.36983	2.51875	0.0144144
CYP46A1	487	0.544148	0.443532	0.0123203	0.815094	0.0226415	0.0277778	0.797048	1.19369	0.012474
CYP4A11	762	0.711286	0.261155	0.0275591	0.367159	0.0387454	0.105528	0.353464	2.46364	0.0283401
CYP4A22	754	0.706897	0.259947	0.0331565	0.36773	0.0469043	0.127551	0.351254	2.41176	0.0342936
CYP4B1	722	0.692521	0.281163	0.0263158	0.406	0.038	0.0935961	0.391137	2.25225	0.027027
CYP4F11	840	0.686905	0.290476	0.022619	0.422877	0.0329289	0.0778689	0.409396	2.19392	0.0231425
CYP4F12	900	0.706667	0.26	0.0333333	0.367925	0.0471698	0.128205	0.351351	2.40909	0.0344828
CYP4F2	762	0.645669	0.321522	0.0328084	0.497967	0.050813	0.102041	0.473888	1.82222	0.0339213
CYP4F22	674	0.700297	0.278932	0.0207715	0.398305	0.029661	0.0744681	0.386831	2.33663	0.0212121
CYP4F3	832	0.698317	0.277644	0.0240385	0.39759	0.0344234	0.0865801	0.384359	2.31474	0.0246305
CYP4F8	700	0.66	0.311429	0.0285714	0.471861	0.04329	0.0917431	0.452282	1.94118	0.0294118
CYP4V2	659	0.714719	0.247344	0.0379363	0.346072	0.0530786	0.153374	0.328629	2.50532	0.0394322
CYP4X1	591	0.659898	0.306261	0.0338409	0.464103	0.0512821	0.110497	0.441463	1.9403	0.0350263
CYP4Z1	540	0.722222	0.244444	0.0333333	0.338462	0.0461538	0.136364	0.323529	2.6	0.0344828
CYP7A1	568	0.713028	0.258803	0.028169	0.362963	0.0395062	0.108844	0.349169	2.48466	0.0289855
CYP7B1	708	0.690678	0.272599	0.0367232	0.394683	0.0531697	0.134715	0.374757	2.23288	0.0381232
CYP8B1	602	0.704319	0.269103	0.0265781	0.382075	0.0377358	0.0987654	0.368182	2.38202	0.0273038
CYSLTR1	326	0.693252	0.291411	0.0153374	0.420354	0.0221239	0.0526316	0.411255	2.26	0.0155763
CYSLTR2	390	0.730769	0.24359	0.025641	0.333333	0.0350877	0.105263	0.322034	2.71429	0.0263158
CYTH3	528	0.530303	0.4375	0.032197	0.825	0.0607143	0.0735931	0.777778	1.12903	0.0332681
CYTH4	440	0.640909	0.340909	0.0181818	0.531915	0.0283688	0.0533333	0.517241	1.78481	0.0185185
CYTIP	383	0.699739	0.276762	0.0234987	0.395522	0.0335821	0.0849057	0.382671	2.33043	0.0240642
D2HGDH	1352	0.630178	0.349852	0.0199704	0.555164	0.0316901	0.0570825	0.538111	1.704	0.0203774
DAAM1	1020	0.673529	0.310784	0.0156863	0.461426	0.0232897	0.0504732	0.450925	2.06306	0.0159363
DAAM2	1359	0.682855	0.303164	0.0139809	0.443966	0.0204741	0.0461165	0.435058	2.15313	0.0141791
DAB1	587	0.67121	0.32368	0.00511073	0.482234	0.00761421	0.0157895	0.478589	2.04145	0.00513699
DAB2	831	0.691937	0.302046	0.00601685	0.436522	0.00869565	0.0199203	0.432759	2.24609	0.00605327
DAB2IP	1685	0.624332	0.368546	0.00712166	0.590304	0.0114068	0.0193237	0.583647	1.66193	0.00717274
DACH2	481	0.713098	0.276507	0.010395	0.387755	0.0145773	0.037594	0.382184	2.48551	0.0105042
DACT1	1191	0.666667	0.327456	0.00587741	0.491184	0.00881612	0.0179487	0.486891	2	0.00591216
DACT2	1063	0.651929	0.313264	0.0348071	0.480519	0.0533911	0.111111	0.456164	1.87297	0.0360624
DAG1	1070	0.645794	0.340187	0.0140187	0.526773	0.0217077	0.0412088	0.515581	1.82322	0.014218
DAGLA	1110	0.582883	0.40991	0.00720721	0.703246	0.0123648	0.0175824	0.694656	1.39741	0.00725953
DAGLB	1085	0.658065	0.321659	0.0202765	0.488796	0.0308123	0.0630372	0.474185	1.92453	0.0206961
DAO	414	0.683575	0.277778	0.0386473	0.40636	0.0565371	0.13913	0.384615	2.16031	0.040201
DAPK1	1609	0.614667	0.372902	0.0124301	0.606673	0.0202224	0.0333333	0.594648	1.59516	0.0125865
DAPK3	676	0.58284	0.399408	0.0177515	0.685279	0.0304569	0.0444444	0.665025	1.39716	0.0180723
DARS2	687	0.720524	0.25182	0.0276565	0.349495	0.0383838	0.109827	0.336576	2.57812	0.0284431
DAXX	537	0.642458	0.340782	0.0167598	0.530435	0.026087	0.0491803	0.516949	1.79688	0.0170455
DAZAP1	600	0.576667	0.416667	0.00666667	0.722543	0.0115607	0.016	0.714286	1.3622	0.00671141
DBF4	664	0.694277	0.289157	0.0165663	0.416486	0.0238612	0.0572917	0.40678	2.27094	0.0168453
DBF4B	1054	0.662239	0.301708	0.0360531	0.455587	0.0544413	0.119497	0.432065	1.96067	0.0374016
DBH	946	0.671247	0.305497	0.0232558	0.455118	0.0346457	0.0761246	0.439878	2.0418	0.0238095
DBN1	938	0.671642	0.32516	0.00319829	0.484127	0.0047619	0.00983607	0.481833	2.04545	0.00320856
DBX2	539	0.638219	0.332096	0.0296846	0.520349	0.0465116	0.0893855	0.497222	1.7641	0.0305927
DCAF12	417	0.628297	0.35012	0.0215827	0.557252	0.0343511	0.0616438	0.538745	1.69032	0.0220588
DCAF12L1	393	0.569975	0.430025	0	0.754464	0	0	0.754464	1.32544	0
DCAF12L2	427	0.629977	0.35363	0.0163934	0.561338	0.0260223	0.0463576	0.547101	1.70253	0.0166667
DCAF13	680	0.686765	0.291176	0.0220588	0.423983	0.0321199	0.0757576	0.410788	2.19249	0.0225564
DCAF15	836	0.588517	0.405502	0.00598086	0.689024	0.0101626	0.0147493	0.682093	1.43023	0.00601685
DCAF4	711	0.663854	0.313643	0.0225035	0.472458	0.0338983	0.0717489	0.456967	1.9749	0.0230216
DCAF4L1	410	0.568293	0.419512	0.0121951	0.738197	0.0214592	0.0290698	0.722689	1.31638	0.0123457
DCAF4L2	530	0.650943	0.318868	0.0301887	0.489855	0.0463768	0.0946746	0.468144	1.86486	0.0311284
DCAF5	892	0.639013	0.35426	0.00672646	0.554386	0.0105263	0.0189873	0.548611	1.77019	0.00677201
DCAF6	998	0.649299	0.330661	0.0200401	0.509259	0.0308642	0.0606061	0.494012	1.85143	0.0204499
DCAF8L1	513	0.637427	0.345029	0.0175439	0.541284	0.0275229	0.0508475	0.526786	1.75806	0.0178571
DCAF8L2	532	0.656015	0.325188	0.018797	0.495702	0.0286533	0.0578035	0.481894	1.9071	0.0191571
DCBLD1	945	0.662434	0.312169	0.0253968	0.471246	0.0383387	0.0813559	0.453846	1.96238	0.0260586
DCBLD2	861	0.672474	0.313589	0.0139373	0.466321	0.0207254	0.0444444	0.456853	2.05319	0.0141343
DCC	1738	0.680092	0.305524	0.0143843	0.449239	0.0211506	0.047081	0.439934	2.1259	0.0145943
DCDC1	2109	0.688478	0.279279	0.0322428	0.405647	0.046832	0.11545	0.3875	2.21005	0.033317
DCDC2	648	0.680556	0.290123	0.029321	0.426304	0.0430839	0.101064	0.408696	2.13043	0.0302067
DCHS1	4122	0.667152	0.323629	0.00921883	0.485091	0.0138182	0.0284858	0.478479	2.00437	0.0093046
DCHS2	4215	0.683274	0.292289	0.0244365	0.427778	0.0357639	0.0836039	0.413007	2.1573	0.0250486
DCLK1	653	0.569678	0.41807	0.0122511	0.733871	0.0215054	0.029304	0.718421	1.32384	0.0124031
DCLK2	885	0.655367	0.336723	0.0079096	0.513793	0.012069	0.0234899	0.507666	1.90164	0.00797267
DCLK3	743	0.674293	0.309556	0.0161507	0.459082	0.0239521	0.0521739	0.448343	2.07025	0.0164159
DCLRE1A	1139	0.704126	0.272169	0.023705	0.386534	0.0336658	0.0870968	0.373945	2.37982	0.0242806
DCLRE1B	714	0.69888	0.284314	0.0168067	0.406814	0.0240481	0.0591133	0.39726	2.32093	0.017094
DCLRE1C	1394	0.639168	0.340029	0.0208034	0.531987	0.0325477	0.0611814	0.515217	1.77137	0.0212454
DCN	392	0.630102	0.357143	0.0127551	0.566802	0.0202429	0.0357143	0.555556	1.70345	0.0129199
DCP1B	841	0.688466	0.286564	0.0249703	0.416235	0.0362694	0.0871369	0.401667	2.20992	0.0256098
DCST1	1027	0.670886	0.297955	0.0311587	0.444122	0.0464441	0.104575	0.424411	2.03846	0.0321608
DCST2	1055	0.685308	0.287204	0.0274882	0.419087	0.0401107	0.0957096	0.402926	2.17771	0.0282651
DCT	728	0.706044	0.255495	0.0384615	0.361868	0.0544747	0.150538	0.343173	2.40187	0.04
DCTN1	1483	0.670263	0.316251	0.0134862	0.471831	0.0201207	0.0426439	0.462525	2.03272	0.0136705
DCX	318	0.660377	0.27673	0.0628931	0.419048	0.0952381	0.227273	0.382609	1.94444	0.0671141
DDB1	936	0.557692	0.435897	0.00641026	0.781609	0.0114943	0.0147059	0.772727	1.26087	0.00645161
DDC	698	0.683381	0.295129	0.02149	0.431866	0.0314465	0.0728155	0.418699	2.15837	0.0219619
DDHD1	1067	0.672915	0.310216	0.0168697	0.461003	0.0250696	0.0543807	0.449728	2.05731	0.0171592
DDHD2	1229	0.670464	0.303499	0.0260374	0.45267	0.038835	0.0857909	0.435748	2.03457	0.0267335
DDI1	342	1	0	0	0	0		0		0
DDN	1123	0.654497	0.332146	0.0133571	0.507483	0.0204082	0.0402145	0.497333	1.89433	0.0135379
DDO	474	0.647679	0.299578	0.0527426	0.462541	0.0814332	0.176056	0.427711	1.83832	0.0556793
DDR1	1089	0.654729	0.328742	0.0165289	0.502104	0.0252454	0.0502793	0.48974	1.89628	0.0168067
DDR2	846	0.63357	0.343972	0.0224586	0.54291	0.0354478	0.0652921	0.524324	1.72903	0.0229746
DDX1	641	0.689548	0.304212	0.00624025	0.441176	0.00904977	0.0205128	0.43722	2.22111	0.00627943
DDX10	951	0.698212	0.270242	0.0315457	0.387048	0.0451807	0.116732	0.370317	2.31359	0.0325733
DDX11	1548	0.664729	0.305556	0.0297158	0.45967	0.0447036	0.0972516	0.44	1.98266	0.0306258
DDX17	589	0.585739	0.410866	0.00339559	0.701449	0.0057971	0.00826446	0.697406	1.41393	0.00340716
DDX18	741	0.716599	0.271255	0.0121457	0.378531	0.0169492	0.0447761	0.372222	2.52857	0.0122951
DDX20	1167	0.672665	0.307626	0.0197087	0.457325	0.0292994	0.0640669	0.444307	2.05497	0.0201049
DDX21	607	0.682043	0.30313	0.014827	0.444444	0.0217391	0.048913	0.434988	2.14508	0.0150502
DDX23	623	0.581059	0.396469	0.0224719	0.68232	0.038674	0.0566802	0.656915	1.38697	0.0229885
DDX24	1126	0.687389	0.298401	0.0142096	0.434109	0.0206718	0.047619	0.425316	2.19886	0.0144144
DDX27	792	0.681818	0.305556	0.0126263	0.448148	0.0185185	0.0413223	0.44	2.14286	0.0127877
DDX31	1483	0.679029	0.301416	0.019555	0.443893	0.0287984	0.064877	0.431467	2.11555	0.019945
DDX39A	495	0.555556	0.438384	0.00606061	0.789091	0.0109091	0.0138249	0.780576	1.25	0.00609756
DDX3X	675	0.597037	0.362963	0.04	0.60794	0.0669975	0.110204	0.569767	1.48162	0.0416667
DDX4	623	0.674157	0.311396	0.0144462	0.461905	0.0214286	0.0463918	0.452214	2.06897	0.014658
DDX41	719	0.556328	0.418637	0.0250348	0.7525	0.045	0.0598007	0.720096	1.25392	0.0256776
DDX42	755	0.655629	0.341722	0.00264901	0.521212	0.0040404	0.00775194	0.519115	1.90385	0.00265604
DDX43	725	0.671724	0.284138	0.0441379	0.422998	0.0657084	0.15534	0.396917	2.04622	0.046176
DDX46	618	0.516181	0.469256	0.0145631	0.909091	0.0282132	0.0310345	0.884146	1.06689	0.0147783
DDX5	521	0.541267	0.456814	0.00191939	0.843972	0.0035461	0.00420168	0.840989	1.17992	0.00192308
DDX50	672	0.63244	0.330357	0.0372024	0.522353	0.0588235	0.112613	0.493333	1.72065	0.0386399
DDX51	1375	0.597818	0.381091	0.0210909	0.63747	0.0352798	0.0553435	0.615746	1.48644	0.0215453
DDX53	532	0.697368	0.291353	0.0112782	0.41779	0.0161725	0.0387097	0.411141	2.30435	0.0114068
DDX54	1853	0.681058	0.30599	0.012952	0.449287	0.0190174	0.042328	0.440902	2.13536	0.0131219
DDX55	807	0.672862	0.306072	0.0210657	0.45488	0.0313076	0.0688259	0.441071	2.05682	0.021519
DDX56	754	0.660477	0.320955	0.0185676	0.485944	0.0281124	0.0578512	0.472656	1.94531	0.0189189
DDX58	916	0.712882	0.248908	0.0382096	0.349158	0.0535988	0.153509	0.331395	2.48289	0.0397276
DDX59	661	0.685325	0.287443	0.0272315	0.419426	0.0397351	0.0947368	0.403397	2.17788	0.0279938
DDX60	1645	0.691793	0.27538	0.0328267	0.398067	0.0474517	0.119205	0.380034	2.24458	0.0339409
DDX60L	1909	0.706129	0.261393	0.0324777	0.370178	0.0459941	0.124248	0.353901	2.40285	0.0335679
DEAF1	1167	0.610111	0.363325	0.0265638	0.595506	0.0435393	0.0731132	0.570659	1.56484	0.0272887
DEF6	598	0.608696	0.369565	0.0217391	0.607143	0.0357143	0.0588235	0.586207	1.55556	0.0222222
DEF8	833	0.645858	0.327731	0.0264106	0.507435	0.0408922	0.0805861	0.4875	1.82373	0.027127
DENND1A	1448	0.634669	0.352901	0.0124309	0.556039	0.0195865	0.035225	0.545358	1.73724	0.0125874
DENND1C	1240	0.679032	0.304032	0.0169355	0.447743	0.0249406	0.0557029	0.436848	2.11558	0.0172272
DENND2A	1212	0.665842	0.316832	0.0173267	0.475836	0.0260223	0.0546875	0.463768	1.99259	0.0176322
DENND2C	921	0.740499	0.229099	0.0304017	0.309384	0.0410557	0.132701	0.297183	2.85356	0.031355
DENND2D	629	0.661367	0.313196	0.0254372	0.473558	0.0384615	0.0812183	0.456019	1.95305	0.0261011
DENND3	1800	0.621667	0.353889	0.0244444	0.569258	0.0393208	0.0690738	0.547721	1.64317	0.0250569
DENND4A	1504	0.676862	0.307181	0.0159574	0.453831	0.0235756	0.0519481	0.443378	2.09465	0.0162162
DENND4B	1706	0.620164	0.356975	0.0228605	0.575614	0.036862	0.0640394	0.55515	1.63272	0.0233953
DENND4C	2180	0.704587	0.279817	0.0155963	0.397135	0.0221354	0.0557377	0.388535	2.38509	0.0158434
DENND5A	1560	0.516026	0.280769	0.203205	0.544099	0.393789	0.723744	0.390374	1.06623	0.255028
DENND5B	1257	0.639618	0.340493	0.0198886	0.532338	0.0310945	0.0584112	0.516285	1.77483	0.0202922
DEPDC1	799	0.724656	0.244055	0.0312891	0.336788	0.0431779	0.128205	0.322848	2.63182	0.0322997
DEPDC1B	625	0.6896	0.2784	0.032	0.403712	0.0464037	0.114943	0.385809	2.22165	0.0330579
DEPDC5	1825	0.645479	0.319452	0.0350685	0.494907	0.0543294	0.109777	0.469404	1.82071	0.036343
DEPTOR	512	0.712891	0.259766	0.0273438	0.364384	0.0383562	0.105263	0.350923	2.48299	0.0281124
DES	825	0.614545	0.362424	0.0230303	0.589744	0.0374753	0.0635452	0.568441	1.59434	0.0235732
DET1	645	0.663566	0.330233	0.00620155	0.497664	0.00934579	0.0187793	0.493056	1.97235	0.00624025
[truncated: 7,252 more rows]

## Sheet: number cutoff 100
Gene name	Number of mutations g	fMg	fSg	fNg	rSMg	rNMg	rNSg	rSMNg	rMSNg	rNSMg
JUN	418	0.586124	0.401914	0.0119617	0.685714	0.0204082	0.0297619	0.672	1.41618	0.0121065
A1CF	684	0.650585	0.312865	0.0365497	0.480899	0.0561798	0.116822	0.455319	1.86192	0.0379363
A2M	3045	0.684401	0.303777	0.0118227	0.443858	0.0172745	0.0389189	0.436321	2.16857	0.0119641
A2ML1	1744	0.669151	0.300459	0.0303899	0.449015	0.0454156	0.101145	0.429508	2.02253	0.0313424
A4GALT	566	0.620141	0.355124	0.024735	0.57265	0.039886	0.0696517	0.550685	1.63256	0.0253623
AAAS	870	0.663218	0.310345	0.0264368	0.467938	0.0398614	0.0851852	0.45	1.96928	0.0271547
AACS	877	0.684151	0.293044	0.022805	0.428333	0.0333333	0.077821	0.414516	2.16606	0.0233372
AADAC	436	0.690367	0.279817	0.0298165	0.405316	0.0431894	0.106557	0.388535	2.22963	0.0307329
AADACL2	462	0.677489	0.268398	0.0541126	0.396166	0.0798722	0.201613	0.366864	2.10067	0.0572082
AADACL3	519	0.691715	0.289017	0.0192678	0.417827	0.0278552	0.0666667	0.406504	2.24375	0.0196464
AADACL4	518	0.741313	0.239382	0.019305	0.322917	0.0260417	0.0806452	0.314721	2.86567	0.019685
AAK1	1165	0.649785	0.337339	0.0128755	0.519155	0.0198151	0.0381679	0.509067	1.85539	0.0130435
AARS2	1287	0.684538	0.282828	0.032634	0.413167	0.0476731	0.115385	0.394366	2.16995	0.0337349
AASDH	1251	0.701839	0.263789	0.0343725	0.375854	0.0489749	0.130303	0.358306	2.35389	0.035596
AASS	949	0.694415	0.277134	0.028451	0.39909	0.0409712	0.102662	0.383382	2.27241	0.0292842
AATK	2266	0.627979	0.359223	0.0127979	0.572031	0.0203795	0.0356265	0.560606	1.68802	0.0129638
ABAT	657	0.642314	0.339422	0.0182648	0.528436	0.028436	0.0538117	0.513825	1.79574	0.0186047
ABCA1	2461	0.655425	0.325884	0.0186916	0.49721	0.0285183	0.0573566	0.483424	1.90212	0.0190476
ABCA10	1618	0.698393	0.261434	0.0401731	0.374336	0.0575221	0.153664	0.353975	2.31557	0.0418545
ABCA12	2646	0.677249	0.301587	0.021164	0.445312	0.03125	0.0701754	0.431818	2.09836	0.0216216
ABCA13	6043	0.701969	0.263776	0.0342545	0.375766	0.0487977	0.129862	0.358283	2.35536	0.0354695
ABCA2	3424	0.588493	0.403037	0.00846963	0.684864	0.0143921	0.0210145	0.675147	1.43009	0.00854197
ABCA3	2315	0.644492	0.339093	0.0164147	0.526139	0.0254692	0.0484076	0.513072	1.81288	0.0166886
ABCA4	3077	0.683133	0.277868	0.038999	0.406755	0.0570885	0.140351	0.384788	2.1559	0.0405817
ABCA5	1673	0.71309	0.255828	0.0310819	0.358759	0.0435876	0.121495	0.343775	2.48542	0.032079
ABCA6	1761	0.723453	0.245315	0.0312323	0.339089	0.0431711	0.127315	0.325056	2.61602	0.0322392
ABCA7	3971	0.652984	0.320322	0.0266935	0.490551	0.0408793	0.0833333	0.471286	1.88171	0.0274256
ABCA8	1837	0.701688	0.261296	0.0370169	0.372382	0.0527541	0.141667	0.353721	2.35219	0.0384398
ABCA9	1718	0.678696	0.278231	0.0430733	0.409949	0.0634648	0.154812	0.385484	2.11232	0.0450122
ABCB1	1615	0.679257	0.299071	0.0216718	0.440292	0.0319052	0.0724638	0.426678	2.11776	0.0221519
ABCB10	837	0.634409	0.339307	0.0262843	0.53484	0.0414313	0.0774648	0.513562	1.73529	0.0269939
ABCB11	1664	0.67488	0.297476	0.0276442	0.440784	0.0409617	0.0929293	0.423439	2.07579	0.0284302
ABCB4	1455	0.664605	0.307904	0.0274914	0.463289	0.041365	0.0892857	0.444886	1.98156	0.0282686
ABCB5	1745	0.70086	0.259026	0.0401146	0.369583	0.0572363	0.154867	0.349575	2.34291	0.041791
ABCB6	1489	0.651444	0.321692	0.0268637	0.493814	0.0412371	0.0835073	0.474257	1.86898	0.0276052
ABCB7	478	0.610879	0.384937	0.0041841	0.630137	0.00684932	0.0108696	0.62585	1.56989	0.00420168
ABCB8	968	0.674587	0.302686	0.0227273	0.448698	0.0336907	0.0750853	0.434074	2.07302	0.0232558
ABCB9	1285	0.656031	0.325292	0.018677	0.495848	0.0284698	0.0574163	0.482122	1.90724	0.0190325
ABCC1	1954	0.61259	0.375128	0.0122825	0.612364	0.0200501	0.0327422	0.600328	1.58124	0.0124352
ABCC10	2755	0.657713	0.317241	0.0250454	0.48234	0.0380795	0.0789474	0.464646	1.92153	0.0256888
ABCC11	1822	0.693194	0.282108	0.0246981	0.406968	0.0356295	0.0875486	0.392966	2.25939	0.0253236
ABCC12	1655	0.67855	0.285196	0.0362538	0.420303	0.0534283	0.127119	0.398986	2.1109	0.0376176
ABCC2	1885	0.697613	0.269496	0.0328912	0.386312	0.0471483	0.122047	0.368918	2.30702	0.0340099
ABCC3	1973	0.689306	0.290928	0.0197669	0.422059	0.0286765	0.0679443	0.410293	2.2186	0.0201655
ABCC4	1517	0.647989	0.334871	0.0171391	0.516785	0.0264496	0.0511811	0.503469	1.84082	0.017438
ABCC5	1407	0.61194	0.366738	0.021322	0.599303	0.0348432	0.0581395	0.579125	1.57692	0.0217865
ABCC6	2271	0.6583	0.304271	0.0374284	0.462207	0.0568562	0.12301	0.437342	1.92655	0.0388838
ABCC8	2087	0.63057	0.34643	0.0229995	0.549392	0.0364742	0.06639	0.530059	1.70687	0.023541
ABCC9	1364	0.606305	0.372434	0.021261	0.614268	0.0350665	0.0570866	0.593458	1.54004	0.0217228
ABCD1	1185	0.644726	0.331646	0.0236287	0.514398	0.0366492	0.0712468	0.496212	1.81473	0.0242005
ABCD2	680	0.636765	0.335294	0.0279412	0.526559	0.0438799	0.0833333	0.504425	1.75304	0.0287443
ABCD3	588	0.666667	0.312925	0.0204082	0.469388	0.0306122	0.0652174	0.455446	2	0.0208333
ABCD4	959	0.630865	0.338895	0.0302398	0.53719	0.0479339	0.0892308	0.512618	1.70904	0.0311828
ABCE1	359	0.571031	0.406685	0.0222841	0.712195	0.0390244	0.0547945	0.685446	1.33117	0.022792
ABCF1	808	0.64604	0.320545	0.0334158	0.496169	0.0517241	0.104247	0.471767	1.82517	0.0345711
ABCF2	592	0.572635	0.403716	0.0236486	0.705015	0.0412979	0.0585774	0.677054	1.33992	0.0242215
ABCF3	861	0.656214	0.325203	0.018583	0.495575	0.0283186	0.0571429	0.481928	1.90878	0.0189349
ABCG1	1036	0.626448	0.352317	0.0212355	0.562404	0.0338983	0.060274	0.543964	1.677	0.0216963
ABCG2	860	0.703488	0.261628	0.0348837	0.371901	0.0495868	0.133333	0.354331	2.37255	0.0361446
ABCG4	683	0.604685	0.374817	0.0204978	0.619855	0.0338983	0.0546875	0.599532	1.52963	0.0209268
ABCG5	1777	0.684299	0.297693	0.0180079	0.435033	0.0263158	0.0604915	0.423878	2.16756	0.0183381
ABCG8	1197	0.700919	0.269006	0.0300752	0.38379	0.0429082	0.111801	0.368	2.34358	0.0310078
ABHD16A	578	0.617647	0.365052	0.017301	0.591036	0.0280112	0.0473934	0.574932	1.61538	0.0176056
ABHD2	411	0.562044	0.418491	0.0194647	0.744589	0.034632	0.0465116	0.719665	1.28333	0.0198511
ABHD8	842	0.587886	0.408551	0.00356295	0.694949	0.00606061	0.00872093	0.690763	1.42651	0.00357569
ABI3	544	0.681985	0.297794	0.0202206	0.436658	0.0296496	0.0679012	0.424084	2.14451	0.0206379
ABI3BP	1924	0.698545	0.276507	0.024948	0.395833	0.0357143	0.0902256	0.382184	2.31724	0.0255864
ABL1	1321	0.620742	0.374716	0.00454201	0.603659	0.00731707	0.0121212	0.599274	1.63673	0.00456274
ABL2	1351	0.656551	0.326425	0.0170244	0.497182	0.0259301	0.0521542	0.484615	1.91164	0.0173193
ABLIM1	995	0.689447	0.297487	0.0130653	0.431487	0.0189504	0.0439189	0.423462	2.22006	0.0132383
ABLIM2	1036	0.638996	0.344595	0.0164093	0.539275	0.0256798	0.047619	0.525773	1.77005	0.016683
ABLIM3	887	0.712514	0.270575	0.0169109	0.379747	0.0237342	0.0625	0.370943	2.47843	0.0172018
ABR	1390	0.598561	0.38705	0.0143885	0.646635	0.0240385	0.0371747	0.631455	1.49104	0.0145985
ABRA	487	0.681725	0.287474	0.0308008	0.421687	0.0451807	0.107143	0.403458	2.14194	0.0317797
ABTB1	719	0.645341	0.329624	0.0250348	0.510776	0.0387931	0.0759494	0.491701	1.81961	0.0256776
ABTB2	1276	0.659875	0.321317	0.0188088	0.486936	0.0285036	0.0585366	0.473441	1.94009	0.0191693
ACACB	3028	0.659841	0.318032	0.0221268	0.481982	0.0335335	0.0695742	0.466344	1.93981	0.0226275
ACAD10	1314	0.678082	0.284627	0.0372907	0.419753	0.0549944	0.131016	0.397872	2.10638	0.0387352
ACAD11	1413	0.681529	0.284501	0.0339703	0.417445	0.0498442	0.119403	0.397626	2.14	0.0351648
ACAD9	986	0.690669	0.291075	0.0182556	0.421439	0.0264317	0.0627178	0.410587	2.23279	0.018595
ACADS	674	0.672107	0.302671	0.0252226	0.450331	0.0375276	0.0833333	0.434043	2.04977	0.0258752
ACAN	3055	0.687725	0.301146	0.0111293	0.437887	0.0161828	0.0369565	0.430913	2.20231	0.0112546
ACAP1	1527	0.663392	0.317616	0.0189915	0.478776	0.0286278	0.0597938	0.465451	1.97082	0.0193591
ACAP2	633	0.652449	0.327014	0.0205371	0.501211	0.031477	0.0628019	0.485915	1.87727	0.0209677
ACAP3	2132	0.626642	0.358818	0.0145403	0.572605	0.0232036	0.0405229	0.55962	1.67839	0.0147549
ACBD3	546	0.653846	0.32967	0.0164835	0.504202	0.0252101	0.05	0.491803	1.88889	0.0167598
ACBD5	703	0.671408	0.3101	0.0184922	0.461864	0.0275424	0.059633	0.449485	2.04329	0.0188406
ACCS	759	0.673254	0.29776	0.0289855	0.44227	0.0430528	0.0973451	0.424015	2.06048	0.0298507
ACCSL	652	0.665644	0.296012	0.0383436	0.4447	0.0576037	0.129534	0.420479	1.99083	0.0398724
ACD	2401	0.67097	0.315285	0.0137443	0.469894	0.0204842	0.0435931	0.460462	2.03924	0.0139358
ACE	2153	0.637715	0.330701	0.0315838	0.518572	0.0495266	0.0955056	0.494101	1.76026	0.0326139
ACE2	473	0.704017	0.281184	0.0147992	0.399399	0.021021	0.0526316	0.391176	2.37857	0.0150215
ACHE	1060	0.600943	0.388679	0.0103774	0.646782	0.0172684	0.026699	0.635802	1.50591	0.0104862
ACIN1	1822	0.662459	0.327662	0.00987925	0.494615	0.014913	0.0301508	0.487347	1.9626	0.00997783
ACKR3	475	0.56	0.433684	0.00631579	0.774436	0.0112782	0.0145631	0.765799	1.27273	0.00635593
ACLY	1133	0.633716	0.346867	0.0194175	0.547354	0.0306407	0.0559796	0.531081	1.73012	0.019802
ACMSD	417	0.673861	0.294964	0.0311751	0.437722	0.0462633	0.105691	0.418367	2.06618	0.0321782
ACO1	962	0.689189	0.284823	0.0259875	0.413273	0.0377074	0.0912409	0.398256	2.21739	0.0266809
ACO2	1222	0.531097	0.459083	0.00981997	0.864407	0.01849	0.0213904	0.848714	1.13264	0.00991736
ACOT11	804	0.690299	0.272388	0.0373134	0.394595	0.0540541	0.136986	0.374359	2.22892	0.0387597
ACOT12	1011	0.70821	0.272997	0.0187933	0.385475	0.0265363	0.0688406	0.37551	2.42712	0.0191532
ACOX1	732	0.624317	0.349727	0.0259563	0.560175	0.0415755	0.0742188	0.537815	1.66182	0.026648
ACOX2	810	0.664198	0.303704	0.0320988	0.457249	0.0483271	0.105691	0.43617	1.97794	0.0331633
ACOX3	1577	0.680406	0.296132	0.0234623	0.435228	0.0344828	0.0792291	0.420721	2.12897	0.024026
ACOXL	917	0.672846	0.294438	0.0327154	0.437601	0.0486224	0.111111	0.417311	2.05667	0.0338219
ACRBP	612	0.665033	0.295752	0.0392157	0.444717	0.0589681	0.132597	0.419954	1.98537	0.0408163
ACSBG1	1029	0.626822	0.350826	0.0223518	0.55969	0.0356589	0.0637119	0.540419	1.67969	0.0228628
ACSBG2	788	0.696701	0.279188	0.0241117	0.400729	0.0346084	0.0863636	0.387324	2.29707	0.0247074
ACSF2	627	0.649123	0.328549	0.0223285	0.506143	0.034398	0.0679612	0.489311	1.85	0.0228385
ACSF3	1998	0.673173	0.298298	0.0285285	0.443123	0.0423792	0.0956376	0.425107	2.05972	0.0293663
ACSL1	754	0.635279	0.338196	0.0265252	0.532359	0.0417537	0.0784314	0.511022	1.74182	0.027248
ACSL3	634	0.638801	0.347003	0.0141956	0.54321	0.0222222	0.0409091	0.531401	1.76856	0.0144
ACSL4	379	0.638522	0.350923	0.0105541	0.549587	0.0165289	0.0300752	0.54065	1.76642	0.0106667
ACSL5	938	0.687633	0.296375	0.0159915	0.431008	0.0232558	0.0539568	0.421212	2.20137	0.0162514
ACSL6	772	0.642487	0.338083	0.0194301	0.52621	0.0302419	0.0574713	0.510763	1.7971	0.0198151
ACSM1	741	0.670715	0.280702	0.048583	0.418511	0.0724346	0.173077	0.390244	2.03689	0.0510638
ACSM2A	911	0.699232	0.256861	0.0439078	0.367347	0.0627943	0.17094	0.345643	2.32482	0.0459242
ACSM2B	946	0.682875	0.272727	0.0443975	0.399381	0.0650155	0.162791	0.375	2.15333	0.0464602
ACSM3	1955	0.729923	0.246547	0.0235294	0.337772	0.0322355	0.0954357	0.327223	2.70265	0.0240964
ACSM4	585	0.528205	0.434188	0.0376068	0.822006	0.0711974	0.0866142	0.767372	1.11957	0.0390764
ACSM5	846	0.672577	0.299054	0.0283688	0.44464	0.0421793	0.0948617	0.426644	2.05415	0.0291971
ACSS1	888	0.603604	0.368243	0.0281532	0.610075	0.0466418	0.0764526	0.582888	1.52273	0.0289687
ACSS2	750	0.709333	0.264	0.0266667	0.37218	0.037594	0.10101	0.358696	2.44037	0.0273973
ACSS3	844	0.695498	0.281991	0.0225118	0.405451	0.032368	0.0798319	0.392739	2.28405	0.0230303
ACTA1	483	0.426501	0.544513	0.0289855	1.2767	0.0679612	0.0532319	1.19545	0.743682	0.0298507
ACTB	438	0.317352	0.678082	0.00456621	2.13669	0.0143885	0.00673401	2.10638	0.464883	0.00458716
ACTBL2	506	0.703557	0.250988	0.0454545	0.356742	0.0646067	0.181102	0.335092	2.37333	0.047619
ACTC1	420	0.45	0.540476	0.00952381	1.20106	0.021164	0.0176211	1.17617	0.818182	0.00961538
ACTG1	1267	0.359116	0.625099	0.0157853	1.74066	0.043956	0.0252525	1.66737	0.560345	0.0160385
ACTG2	320	0.5125	0.471875	0.015625	0.920732	0.0304878	0.0331126	0.893491	1.05128	0.015873
ACTL6B	362	0.494475	0.466851	0.038674	0.944134	0.0782123	0.0828402	0.875648	0.978142	0.0402299
ACTL7A	582	0.676976	0.295533	0.0274914	0.436548	0.0406091	0.0930233	0.419512	2.09574	0.0282686
ACTL7B	643	0.642302	0.33437	0.0233281	0.520581	0.0363196	0.0697674	0.502336	1.79565	0.0238854
ACTL8	470	0.608511	0.380851	0.0106383	0.625874	0.0174825	0.027933	0.61512	1.55435	0.0107527
ACTL9	639	0.687011	0.289515	0.0234742	0.421412	0.0341686	0.0810811	0.407489	2.195	0.0240385
ACTN1	1212	0.64604	0.342409	0.0115512	0.530013	0.0178799	0.0337349	0.520703	1.82517	0.0116861
ACTN2	1195	0.639331	0.343096	0.0175732	0.536649	0.0274869	0.0512195	0.522293	1.77262	0.0178876
ACTN4	1177	0.57859	0.414613	0.00679694	0.716593	0.0117474	0.0163934	0.708273	1.37298	0.00684346
ACTR1B	712	0.713483	0.272472	0.0140449	0.38189	0.019685	0.0515464	0.374517	2.4902	0.014245
ACTR5	771	0.669261	0.30869	0.0220493	0.46124	0.0329457	0.0714286	0.446529	2.02353	0.0225464
ACTR8	1351	0.680237	0.285714	0.0340489	0.420022	0.0500544	0.119171	0.4	2.12731	0.035249
ACTRT1	349	0.727794	0.255014	0.017192	0.350394	0.023622	0.0674157	0.342308	2.67368	0.0174927
ACTRT2	573	0.633508	0.34555	0.0209424	0.545455	0.0330579	0.0606061	0.528	1.72857	0.0213904
ACVR1	479	0.60334	0.36952	0.0271399	0.612457	0.0449827	0.0734463	0.586093	1.52105	0.027897
ACVR1B	450	0.56	0.428889	0.0111111	0.765873	0.0198413	0.0259067	0.750973	1.27273	0.011236
ACVR1C	470	0.629787	0.340426	0.0297872	0.540541	0.0472973	0.0875	0.516129	1.70115	0.0307018
ACVR2A	348	0.58908	0.408046	0.00287356	0.692683	0.00487805	0.00704225	0.68932	1.43357	0.00288184
ACVR2B	603	0.606965	0.383085	0.00995025	0.631148	0.0163934	0.025974	0.620968	1.5443	0.0100503
ACVRL1	704	0.634943	0.325284	0.0397727	0.512304	0.0626398	0.122271	0.482105	1.7393	0.0414201
ADAD1	563	0.698046	0.280639	0.0213144	0.402036	0.0305344	0.0759494	0.390123	2.31176	0.0217786
ADAD2	1342	0.634873	0.339046	0.0260805	0.534038	0.0410798	0.0769231	0.512965	1.73878	0.0267789
ADAM10	577	0.629116	0.362218	0.00866551	0.575758	0.0137741	0.0239234	0.567935	1.69626	0.00874126
ADAM11	833	0.609844	0.367347	0.0228091	0.602362	0.0374016	0.0620915	0.580645	1.56308	0.0233415
ADAM12	1053	0.663818	0.322887	0.0132953	0.486409	0.0200286	0.0411765	0.476858	1.97458	0.0134745
ADAM15	1269	0.659574	0.308905	0.0315209	0.468339	0.0477897	0.102041	0.446978	1.9375	0.0325468
ADAM17	1201	0.65612	0.331391	0.0124896	0.505076	0.0190355	0.0376884	0.495641	1.90799	0.0126476
ADAM18	897	0.693423	0.263099	0.0434783	0.379421	0.062701	0.165254	0.357035	2.26182	0.0454545
ADAM19	1011	0.668645	0.310584	0.0207715	0.464497	0.0310651	0.066879	0.450502	2.01791	0.0212121
ADAM2	883	0.718007	0.246886	0.0351076	0.343849	0.0488959	0.142202	0.32782	2.54618	0.036385
ADAM20	861	0.720093	0.248548	0.0313589	0.345161	0.0435484	0.126168	0.330757	2.57261	0.0323741
ADAM21	861	0.653891	0.313589	0.0325203	0.479574	0.0497336	0.103704	0.456853	1.88926	0.0336134
ADAM22	1129	0.666962	0.310009	0.0230292	0.464807	0.0345286	0.0742857	0.449294	2.00266	0.0235721
ADAM23	842	0.686461	0.300475	0.0130641	0.437716	0.0190311	0.0434783	0.429542	2.18939	0.0132371
ADAM28	1078	0.710575	0.258813	0.0306122	0.36423	0.0430809	0.11828	0.349186	2.45513	0.0315789
ADAM29	1046	0.707457	0.264818	0.0277247	0.374324	0.0391892	0.104693	0.360208	2.4183	0.0285152
ADAM30	929	0.689989	0.286329	0.0236814	0.414977	0.0343214	0.0827068	0.401207	2.22569	0.0242558
ADAM32	930	0.707527	0.256989	0.0354839	0.363222	0.050152	0.138075	0.345876	2.41912	0.0367893
ADAM33	1506	0.64077	0.325365	0.0338645	0.507772	0.0528497	0.104082	0.482283	1.78373	0.0350515
ADAM7	918	0.717865	0.252723	0.0294118	0.352049	0.0409712	0.116379	0.338192	2.5444	0.030303
ADAM9	1239	0.678773	0.305892	0.0153349	0.450654	0.0225922	0.0501319	0.440698	2.11307	0.0155738
ADAMDEC1	561	0.691622	0.272727	0.0356506	0.39433	0.0515464	0.130719	0.375	2.24277	0.0369686
ADAMTS1	1232	0.681006	0.30763	0.0113636	0.451728	0.0166865	0.0369393	0.444314	2.13486	0.0114943
ADAMTS10	1397	0.600573	0.384395	0.0150322	0.640048	0.0250298	0.0391061	0.624419	1.50358	0.0152616
ADAMTS12	1955	0.685934	0.282353	0.0317136	0.411633	0.0462342	0.112319	0.393443	2.18404	0.0327522
ADAMTS13	2715	0.686188	0.288766	0.025046	0.420827	0.0365003	0.0867347	0.406007	2.18662	0.0256895
ADAMTS14	1712	0.671729	0.303154	0.0251168	0.451304	0.0373913	0.0828516	0.435038	2.04626	0.0257639
ADAMTS15	1298	0.658706	0.325886	0.0154083	0.494737	0.0233918	0.0472813	0.483429	1.93002	0.0156495
ADAMTS16	1570	0.67707	0.303822	0.0191083	0.44873	0.028222	0.0628931	0.436414	2.09665	0.0194805
ADAMTS17	2030	0.635961	0.340394	0.0236453	0.535244	0.0371805	0.0694645	0.516057	1.74696	0.024218
ADAMTS18	2127	0.672308	0.298543	0.029149	0.444056	0.0433566	0.0976378	0.425603	2.05165	0.0300242
ADAMTS19	1264	0.660601	0.307753	0.0316456	0.465868	0.0479042	0.102828	0.444571	1.94639	0.0326797
ADAMTS2	1569	0.643722	0.345443	0.0108349	0.536634	0.0168317	0.0313653	0.527751	1.8068	0.0109536
ADAMTS20	2186	0.725069	0.23925	0.0356816	0.329968	0.0492114	0.14914	0.314492	2.63727	0.0370019
ADAMTS3	1336	0.720808	0.257485	0.0217066	0.357217	0.0301142	0.0843023	0.346774	2.58177	0.0221882
ADAMTS4	1583	0.602021	0.377764	0.0202148	0.627492	0.0335782	0.0535117	0.607107	1.5127	0.0206319
ADAMTS5	1206	0.656716	0.322554	0.0207297	0.491162	0.0315657	0.0642674	0.476132	1.91304	0.0211685
ADAMTS6	997	0.650953	0.338014	0.0110331	0.51926	0.0169492	0.0326409	0.510606	1.86494	0.0111562
ADAMTS7	2586	0.637278	0.341454	0.0212684	0.535801	0.0333738	0.0622877	0.518497	1.75693	0.0217305
ADAMTS8	1263	0.653998	0.320665	0.0253365	0.490315	0.0387409	0.0790123	0.472028	1.89016	0.0259951
ADAMTS9	2324	0.668675	0.318847	0.0124785	0.476834	0.0186615	0.0391363	0.468099	2.01818	0.0126362
ADAMTSL1	2841	0.669835	0.312918	0.0172474	0.467157	0.0257488	0.0551181	0.45543	2.02878	0.0175501
ADAMTSL2	1205	0.604149	0.374274	0.0215768	0.619505	0.0357143	0.0576497	0.598143	1.52621	0.0220526
ADAMTSL3	2049	0.696925	0.27672	0.0263543	0.397059	0.0378151	0.0952381	0.382591	2.29952	0.0270677
ADAMTSL4	1629	0.669122	0.294045	0.0368324	0.43945	0.0550459	0.125261	0.416522	2.02226	0.0382409
ADAR	1382	0.627352	0.350217	0.0224313	0.558247	0.0357555	0.0640496	0.538976	1.6835	0.022946
ADARB1	756	0.616402	0.374339	0.00925926	0.607296	0.0150215	0.024735	0.598309	1.6069	0.00934579
ADARB2	1048	0.624046	0.371183	0.00477099	0.594801	0.00764526	0.0128535	0.590288	1.6599	0.00479386
ADAT1	699	0.702432	0.260372	0.037196	0.370672	0.0529532	0.142857	0.352031	2.36058	0.038633
ADCK1	776	0.68299	0.277062	0.0399485	0.40566	0.0584906	0.144186	0.383244	2.15447	0.0416107
ADCK2	786	0.680662	0.300254	0.019084	0.441121	0.0280374	0.0635593	0.429091	2.13147	0.0194553
ADCK5	1265	0.596047	0.389723	0.0142292	0.653846	0.0238727	0.0365112	0.638601	1.47554	0.0144346
ADCY1	1101	0.558583	0.432334	0.00908265	0.773984	0.0162602	0.0210084	0.7616	1.26543	0.0091659
ADCY10	1777	0.673044	0.29094	0.0360158	0.432274	0.0535117	0.123791	0.410317	2.05852	0.0373614
ADCY2	931	0.595059	0.401719	0.00322234	0.67509	0.00541516	0.00802139	0.671454	1.4695	0.00323276
ADCY3	1479	0.675456	0.308993	0.015551	0.457457	0.023023	0.0503282	0.447162	2.08125	0.0157967
ADCY4	1396	0.641834	0.328797	0.0293696	0.512277	0.0457589	0.0893246	0.489861	1.792	0.0302583
ADCY5	1782	0.554433	0.328844	0.116723	0.593117	0.210526	0.354949	0.489967	1.24433	0.132147
ADCY6	1371	0.657914	0.329686	0.0123997	0.501109	0.018847	0.0376106	0.491839	1.92324	0.0125554
ADCY7	1371	0.617797	0.369074	0.0131291	0.597403	0.0212515	0.0355731	0.584971	1.61641	0.0133038
ADCY8	1404	0.641026	0.345442	0.0135328	0.538889	0.0211111	0.0391753	0.527748	1.78571	0.0137184
ADCY9	1862	0.623523	0.368421	0.00805585	0.59087	0.0129199	0.0218659	0.583333	1.65621	0.00812128
ADCYAP1R1	539	0.625232	0.343228	0.0315399	0.548961	0.0504451	0.0918919	0.522599	1.66832	0.032567
ADD1	911	0.701427	0.289791	0.00878156	0.413146	0.0125196	0.030303	0.408037	2.34926	0.00885936
ADD2	893	0.62486	0.362822	0.012318	0.580645	0.0197133	0.0339506	0.56942	1.66567	0.0124717
ADD3	738	0.708672	0.284553	0.00677507	0.40153	0.00956023	0.0238095	0.397727	2.43256	0.00682128
ADGB	1709	0.717964	0.252194	0.029842	0.351263	0.0415648	0.118329	0.337246	2.54564	0.03076
ADH1A	422	0.701422	0.28673	0.0118483	0.408784	0.0168919	0.0413223	0.401993	2.34921	0.0119904
ADH1B	527	0.677419	0.303605	0.0189753	0.448179	0.0280112	0.0625	0.435967	2.1	0.0193424
ADH6	422	0.701422	0.270142	0.028436	0.385135	0.0405405	0.105263	0.37013	2.34921	0.0292683
ADH7	547	0.727605	0.254113	0.0182815	0.349246	0.0251256	0.0719424	0.340686	2.67114	0.018622
ADHFE1	579	0.708117	0.279793	0.0120898	0.395122	0.0170732	0.0432099	0.388489	2.42604	0.0122378
ADNP	426	0	0.957746	0.0422535			0.0441176	22.6667	0	0.0441176
ADNP2	460	0	0.978261	0.0217391			0.0222222	45	0	0.0222222
ADORA1	403	0.627792	0.362283	0.00992556	0.577075	0.0158103	0.0273973	0.568093	1.68667	0.0100251
ADORA2A	489	0.642127	0.349693	0.00817996	0.544586	0.0127389	0.0233918	0.537736	1.79429	0.00824742
ADORA3	757	0.663144	0.324967	0.011889	0.49004	0.0179283	0.0365854	0.481409	1.96863	0.0120321
ADRA1A	1055	0.669194	0.300474	0.0303318	0.449008	0.0453258	0.100946	0.429539	2.02292	0.0312805
ADRA1B	738	0.654472	0.329268	0.0162602	0.503106	0.0248447	0.0493827	0.490909	1.89412	0.0165289
ADRA1D	876	0.655251	0.319635	0.0251142	0.487805	0.0383275	0.0785714	0.469799	1.90066	0.0257611
ADRA2A	624	0.625	0.357372	0.0176282	0.571795	0.0282051	0.0493274	0.55611	1.66667	0.0179445
ADRB2	530	0.609434	0.358491	0.0320755	0.588235	0.0526316	0.0894737	0.558824	1.56039	0.0331384
ADSL	574	0.698606	0.266551	0.0348432	0.381546	0.0498753	0.130719	0.36342	2.31792	0.0361011
AEBP1	1629	0.67035	0.308778	0.0208717	0.460623	0.0311355	0.0675944	0.446714	2.03352	0.0213166
AFAP1	1698	0.657244	0.326855	0.0159011	0.497312	0.0241935	0.0486486	0.485564	1.91753	0.016158
AFAP1L1	931	0.664876	0.303974	0.0311493	0.457189	0.0468498	0.102473	0.436728	1.98397	0.0321508
AFAP1L2	1127	0.644188	0.332742	0.0230701	0.516529	0.0358127	0.0693333	0.49867	1.81047	0.0236149
AFF1	1488	0.686156	0.305108	0.00873656	0.444662	0.0127326	0.0286344	0.439072	2.1863	0.00881356
AFF2	970	0.684536	0.310309	0.00515464	0.453313	0.00753012	0.0166113	0.449925	2.16993	0.00518135
AFF3	1600	0.663125	0.33	0.006875	0.497644	0.0103676	0.0208333	0.492537	1.96846	0.00692259
AFF4	1023	0.679374	0.317693	0.00293255	0.467626	0.00431655	0.00923077	0.465616	2.1189	0.00294118
AFG3L2	903	0.644518	0.326689	0.0287929	0.506873	0.0446735	0.0881356	0.485197	1.81308	0.0296465
AFM	731	0.705882	0.253078	0.0410397	0.358527	0.0581395	0.162162	0.338828	2.4	0.042796
AFP	660	0.683333	0.287879	0.0287879	0.421286	0.0421286	0.1	0.404255	2.15789	0.0296412
AFTPH	884	0.727376	0.264706	0.00791855	0.363919	0.0108865	0.0299145	0.36	2.66805	0.00798176
AGAP1	1733	0.641085	0.348529	0.0103866	0.543654	0.0162016	0.0298013	0.534987	1.78617	0.0104956
AGAP2	1552	0.54317	0.32732	0.12951	0.60261	0.238434	0.395669	0.48659	1.189	0.148779
AGAP3	1420	0.604225	0.385915	0.00985915	0.638695	0.016317	0.0255474	0.62844	1.52669	0.00995733
AGAP5	785	0.68535	0.287898	0.0267516	0.420074	0.0390335	0.0929204	0.404293	2.17814	0.0274869
AGAP6	908	0.704846	0.26652	0.0286344	0.378125	0.040625	0.107438	0.363363	2.38806	0.0294785
AGBL1	1800	0.672778	0.292778	0.0344444	0.435178	0.0511974	0.117647	0.413983	2.05603	0.0356732
AGBL2	950	0.684211	0.273684	0.0421053	0.4	0.0615385	0.153846	0.376812	2.16667	0.043956
AGBL3	1192	0.690436	0.276846	0.0327181	0.400972	0.0473876	0.118182	0.382831	2.23035	0.0338248
AGBL4	713	0.691445	0.286115	0.0224404	0.413793	0.0324544	0.0784314	0.400786	2.24091	0.0229555
AGBL5	1138	0.669596	0.314587	0.0158172	0.469816	0.023622	0.0502793	0.458974	2.0266	0.0160714
AGFG2	552	0.655797	0.327899	0.0163043	0.5	0.0248619	0.0497238	0.487871	1.90526	0.0165746
AGGF1	799	0.689612	0.292866	0.0175219	0.424682	0.0254083	0.0598291	0.414159	2.22177	0.0178344
AGK	514	0.669261	0.291829	0.0389105	0.436047	0.0581395	0.133333	0.412088	2.02353	0.0404858
AGL	1779	0.708263	0.251827	0.0399101	0.355556	0.0563492	0.158482	0.336589	2.42775	0.0415691
AGMO	789	0.708492	0.258555	0.0329531	0.364937	0.0465116	0.127451	0.348718	2.43043	0.034076
AGPAT4	373	0.608579	0.372654	0.0187668	0.612335	0.030837	0.0503597	0.594017	1.55479	0.0191257
AGPS	533	0.585366	0.401501	0.0131332	0.685897	0.0224359	0.0327103	0.670846	1.41176	0.013308
AGRN	3476	0.624281	0.367952	0.00776755	0.589401	0.0124424	0.0211102	0.582157	1.66156	0.00782836
AGT	727	0.624484	0.349381	0.0261348	0.559471	0.0418502	0.0748031	0.536998	1.663	0.0268362
AGTPBP1	1247	0.672815	0.309543	0.0176423	0.460072	0.0262217	0.0569948	0.448316	2.05637	0.0179592
AGTR1	453	0.668874	0.306843	0.0242826	0.458746	0.0363036	0.0791367	0.442675	2.02	0.0248869
AGTR2	299	0.70903	0.267559	0.0234114	0.377358	0.0330189	0.0875	0.365297	2.43678	0.0239726
AGXT	682	0.671554	0.281525	0.0469208	0.419214	0.069869	0.166667	0.391837	2.04464	0.0492308
AGXT2	697	0.700143	0.262554	0.0373027	0.375	0.0532787	0.142077	0.356031	2.33493	0.0387481
AHCTF1	2376	0.720118	0.274832	0.00505051	0.381648	0.00701344	0.0183767	0.37899	2.57293	0.00507614
AHCY	721	0.628294	0.352288	0.0194175	0.560706	0.0309051	0.0551181	0.543897	1.6903	0.019802
AHCYL2	581	0.619621	0.364888	0.0154905	0.588889	0.025	0.0424528	0.574526	1.62896	0.0157343
AHDC1	2029	0.624446	0.364712	0.0108428	0.584057	0.0173639	0.0297297	0.574088	1.66273	0.0109616
AHI1	1451	0.707099	0.252929	0.0399724	0.3577	0.0565302	0.158038	0.338561	2.41412	0.0416368
AHNAK	7199	0.712321	0.283095	0.00458397	0.397426	0.00643526	0.0161923	0.394885	2.4761	0.00460508
AHNAK2	11661	0.666152	0.322957	0.010891	0.484809	0.0163491	0.0337228	0.477011	1.99538	0.0110109
AHR	872	0.680046	0.309633	0.0103211	0.455312	0.0151771	0.0333333	0.448505	2.12545	0.0104287
AHSG	497	0.706237	0.277666	0.0160966	0.393162	0.022792	0.057971	0.384401	2.40411	0.0163599
AICDA	270	0.611111	0.340741	0.0481481	0.557576	0.0787879	0.141304	0.516854	1.57143	0.0505837
AIFM1	867	0.649366	0.344867	0.00576701	0.531083	0.00888099	0.0167224	0.526408	1.85197	0.00580046
AIFM3	766	0.638381	0.335509	0.0261097	0.525562	0.0408998	0.077821	0.504912	1.76534	0.0268097
AIM2	344	0.686047	0.27907	0.0348837	0.40678	0.0508475	0.125	0.387097	2.18519	0.0361446
AIPL1	605	0.646281	0.323967	0.0297521	0.501279	0.0460358	0.0918367	0.479218	1.8271	0.0306644
AIRE	886	0.6614	0.310384	0.0282167	0.469283	0.0426621	0.0909091	0.450082	1.95333	0.029036
AJAP1	570	0.654386	0.342105	0.00350877	0.522788	0.00536193	0.0102564	0.52	1.8934	0.00352113
AK5	559	0.624329	0.36136	0.0143113	0.578797	0.0229226	0.039604	0.565826	1.6619	0.0145191
AK7	922	0.703905	0.261388	0.0347072	0.371341	0.0493066	0.13278	0.353891	2.37729	0.0359551
AK8	678	0.644543	0.325959	0.0294985	0.505721	0.0457666	0.0904977	0.483589	1.81328	0.0303951
AKAP1	988	0.67004	0.316802	0.0131579	0.47281	0.0196375	0.0415335	0.463704	2.03067	0.0133333
AKAP11	1931	0.707405	0.284827	0.007768	0.402635	0.010981	0.0272727	0.398262	2.4177	0.00782881
AKAP12	1971	0.694064	0.297311	0.00862506	0.428363	0.0124269	0.0290102	0.423105	2.26866	0.0087001
AKAP13	3583	0.706391	0.283561	0.0100474	0.401422	0.0142236	0.0354331	0.395793	2.40589	0.0101494
AKAP17A	1017	0.639135	0.351032	0.00983284	0.549231	0.0153846	0.0280112	0.540909	1.77112	0.00993049
AKAP3	958	0.710856	0.269311	0.019833	0.378855	0.0279001	0.0736434	0.368571	2.45848	0.0202343
AKAP4	593	0.696459	0.296796	0.00674536	0.42615	0.00968523	0.0227273	0.422062	2.29444	0.00679117
AKAP6	2516	0.722178	0.269475	0.00834658	0.373143	0.0115575	0.0309735	0.368879	2.59943	0.00841683
AKAP8	999	0.683684	0.308308	0.00800801	0.450952	0.011713	0.025974	0.445731	2.16139	0.00807265
AKAP8L	957	0.658307	0.329154	0.0125392	0.5	0.0190476	0.0380952	0.490654	1.92661	0.0126984
AKAP9	4014	0.713004	0.261584	0.0254111	0.366876	0.0356394	0.0971429	0.354251	2.48438	0.0260736
AKNA	1857	0.698977	0.290253	0.0107701	0.415254	0.0154083	0.0371058	0.408953	2.322	0.0108873
AKNAD1	917	0.721919	0.241003	0.0370774	0.333837	0.0513595	0.153846	0.317529	2.59608	0.0385051
AKR1D1	362	0.679558	0.290055	0.0303867	0.426829	0.0447154	0.104762	0.40856	2.12069	0.031339
AKT1	494	0.518219	0.475709	0.00607287	0.917969	0.0117188	0.012766	0.907336	1.07563	0.00610998
AKT2	485	0.579381	0.404124	0.0164948	0.697509	0.0284698	0.0408163	0.678201	1.37745	0.0167715
AKT3	308	0.532468	0.454545	0.012987	0.853659	0.0243902	0.0285714	0.833333	1.13889	0.0131579
ALAS1	716	0.657821	0.326816	0.0153631	0.496815	0.0233546	0.0470085	0.485477	1.92245	0.0156028
ALAS2	470	0.608511	0.387234	0.00425532	0.636364	0.00699301	0.010989	0.631944	1.55435	0.0042735
ALB	809	0.642769	0.33869	0.0185414	0.526923	0.0288462	0.0547445	0.51215	1.79931	0.0188917
ALCAM	603	0.661692	0.330017	0.00829187	0.498747	0.0125313	0.0251256	0.492574	1.95588	0.0083612
ALDH16A1	1422	0.666667	0.311533	0.0218003	0.4673	0.0327004	0.0699774	0.452503	2	0.0222861
ALDH18A1	777	0.660232	0.316602	0.023166	0.479532	0.0350877	0.0731707	0.463277	1.94318	0.0237154
ALDH1A1	495	0.632323	0.359596	0.00808081	0.56869	0.0127796	0.0224719	0.561514	1.71978	0.00814664
ALDH1A2	572	0.648601	0.339161	0.0122378	0.522911	0.0188679	0.0360825	0.513228	1.84577	0.0123894
ALDH1A3	521	0.608445	0.378119	0.0134357	0.621451	0.022082	0.035533	0.608025	1.55392	0.0136187
ALDH1B1	714	0.677871	0.298319	0.0238095	0.440083	0.035124	0.0798122	0.42515	2.10435	0.0243902
ALDH1L1	1174	0.66184	0.32368	0.0144804	0.48906	0.021879	0.0447368	0.478589	1.95718	0.0146932
ALDH1L2	904	0.68031	0.290929	0.0287611	0.427642	0.0422764	0.0988593	0.410296	2.12803	0.0296128
ALDH2	639	0.621283	0.359937	0.0187793	0.579345	0.0302267	0.0521739	0.562347	1.6405	0.0191388
ALDH3A1	950	0.662105	0.309474	0.0284211	0.467409	0.0429253	0.0918367	0.448171	1.9595	0.0292524
ALDH3B2	614	0.68241	0.294788	0.0228013	0.431981	0.0334129	0.0773481	0.418014	2.14872	0.0233333
ALDH4A1	864	0.627315	0.355324	0.0173611	0.566421	0.0276753	0.0488599	0.551167	1.68323	0.0176678
ALDH5A1	906	0.668874	0.317881	0.013245	0.475248	0.019802	0.0416667	0.466019	2.02	0.0134228
ALDH6A1	1290	0.682171	0.294574	0.0232558	0.431818	0.0340909	0.0789474	0.417582	2.14634	0.0238095
ALDH8A1	583	0.663808	0.312178	0.0240137	0.470284	0.0361757	0.0769231	0.453865	1.97449	0.0246046
ALDOB	589	0.63837	0.329372	0.0322581	0.515957	0.0505319	0.0979381	0.491139	1.76526	0.0333333
ALG1	1017	0.641101	0.325467	0.0334317	0.507669	0.0521472	0.102719	0.482507	1.7863	0.034588
ALG10	483	0.689441	0.271222	0.0393375	0.393393	0.0570571	0.145038	0.372159	2.22	0.0409483
ALG10B	553	0.745027	0.218807	0.0361664	0.293689	0.0485437	0.165289	0.280093	2.92199	0.0375235
ALG13	917	0.664122	0.323882	0.0119956	0.487685	0.0180624	0.037037	0.479032	1.97727	0.0121413
ALG9	685	0.652555	0.319708	0.0277372	0.489933	0.0425056	0.086758	0.469957	1.87815	0.0285285
ALK	2453	0.656339	0.326131	0.0175296	0.496894	0.0267081	0.05375	0.483969	1.90985	0.0178423
ALKBH8	689	0.711176	0.268505	0.0203193	0.377551	0.0285714	0.0756757	0.367063	2.46231	0.0207407
ALLC	676	0.680473	0.288462	0.0310651	0.423913	0.0456522	0.107692	0.405405	2.12963	0.0320611
ALOX12	864	0.650463	0.305556	0.0439815	0.469751	0.0676157	0.143939	0.44	1.86093	0.0460048
ALOX12B	823	0.667072	0.312272	0.0206561	0.468124	0.0309654	0.0661479	0.454064	2.00365	0.0210918
ALOX15	898	0.639198	0.324053	0.0367483	0.506969	0.0574913	0.113402	0.479407	1.7716	0.0381503
ALOX15B	939	0.658147	0.308839	0.0330138	0.469256	0.0501618	0.106897	0.446841	1.92523	0.034141
ALOX5	892	0.642377	0.334081	0.0235426	0.52007	0.0366492	0.0704698	0.501684	1.79624	0.0241102
ALOXE3	1180	0.669492	0.295763	0.0347458	0.441772	0.0518987	0.117479	0.419976	2.02564	0.0359965
ALPI	790	0.634177	0.332911	0.0329114	0.52495	0.0518962	0.0988593	0.499051	1.73356	0.0340314
ALPK1	1480	0.695946	0.268919	0.0351351	0.386408	0.0504854	0.130653	0.367837	2.28889	0.0364146
ALPK2	2477	0.685103	0.289059	0.0258377	0.421921	0.0377136	0.0893855	0.406587	2.17564	0.026523
ALPK3	2276	0.677944	0.297452	0.0246046	0.438756	0.0362929	0.0827179	0.42339	2.10505	0.0252252
ALPL	704	0.62642	0.339489	0.0340909	0.54195	0.0544218	0.100418	0.513978	1.67681	0.0352941
ALPP	884	0.678733	0.299774	0.0214932	0.441667	0.0316667	0.0716981	0.42811	2.11268	0.0219653
ALS2	1678	0.678188	0.294398	0.0274136	0.434095	0.0404218	0.0931174	0.41723	2.10741	0.0281863
ALS2CL	1404	0.633903	0.323362	0.042735	0.510112	0.0674157	0.132159	0.477895	1.73152	0.0446429
ALX1	380	0.723684	0.265789	0.0105263	0.367273	0.0145455	0.039604	0.362007	2.61905	0.0106383
ALX4	633	0.612954	0.363349	0.0236967	0.592784	0.0386598	0.0652174	0.57072	1.58367	0.0242718
AMACR	549	0.690346	0.289617	0.0200364	0.419525	0.0290237	0.0691824	0.407692	2.22941	0.0204461
AMBN	569	0.72935	0.256591	0.0140598	0.351807	0.0192771	0.0547945	0.345154	2.69481	0.0142602
AMBP	450	0.695556	0.275556	0.0288889	0.396166	0.0415335	0.104839	0.380368	2.28467	0.0297483
AMBRA1	1415	0.656537	0.330035	0.0134276	0.502691	0.0204521	0.0406852	0.492616	1.91152	0.0136103
AMDHD1	634	0.700315	0.282334	0.0173502	0.403153	0.0247748	0.0614525	0.393407	2.33684	0.0176565
AMDHD2	1081	0.607771	0.362627	0.0296022	0.596651	0.0487062	0.0816327	0.56894	1.54953	0.0305052
AMER1	1001	0.719281	0.264735	0.015984	0.368056	0.0222222	0.0603774	0.360054	2.56228	0.0162437
AMFR	667	0.653673	0.32084	0.0254873	0.490826	0.0389908	0.0794393	0.472406	1.88745	0.0261538
AMHR2	749	0.640854	0.307076	0.0520694	0.479167	0.08125	0.169565	0.44316	1.78439	0.0549296
AMIGO2	1008	0.661706	0.335317	0.00297619	0.506747	0.00449775	0.00887574	0.504478	1.95601	0.00298507
AMOT	784	0.688776	0.302296	0.00892857	0.438889	0.012963	0.0295359	0.433272	2.21311	0.00900901
AMOTL1	1163	0.672399	0.312124	0.0154772	0.464194	0.0230179	0.0495868	0.45375	2.05249	0.0157205
AMOTL2	1072	0.68097	0.307836	0.011194	0.452055	0.0164384	0.0363636	0.444744	2.1345	0.0113208
AMPD1	917	0.715376	0.251908	0.0327154	0.352134	0.0457317	0.12987	0.336735	2.51341	0.0338219
AMPD2	1120	0.616964	0.364286	0.01875	0.590449	0.0303907	0.0514706	0.573034	1.61072	0.0191083
AMPD3	900	0.667778	0.314444	0.0177778	0.470882	0.0266223	0.0565371	0.458671	2.01003	0.0180995
AMPH	1341	0.690529	0.287845	0.0216257	0.416847	0.0313175	0.0751295	0.404188	2.23133	0.0221037
AMY2B	749	0.724967	0.236315	0.0387183	0.325967	0.053407	0.163842	0.309441	2.63592	0.0402778
AMZ1	2365	0.641438	0.334884	0.0236786	0.522083	0.036915	0.0707071	0.503497	1.78892	0.0242529
ANAPC1	1802	0.674806	0.310766	0.0144284	0.460526	0.0213816	0.0464286	0.450886	2.07509	0.0146396
ANAPC2	1669	0.609347	0.382864	0.0077891	0.628319	0.0127827	0.0203443	0.620388	1.55982	0.00785024
ANAPC4	680	0.651471	0.323529	0.025	0.496614	0.0383747	0.0772727	0.478261	1.8692	0.025641
ANAPC5	719	0.617524	0.357441	0.0250348	0.578829	0.0405405	0.0700389	0.556277	1.61455	0.0256776
ANAPC7	594	0.62963	0.348485	0.0218855	0.553476	0.0347594	0.0628019	0.534884	1.7	0.0223752
ANGEL1	744	0.658602	0.306452	0.0349462	0.465306	0.0530612	0.114035	0.44186	1.92913	0.0362117
ANGPT1	446	0.681614	0.307175	0.0112108	0.450658	0.0164474	0.0364964	0.443366	2.14085	0.0113379
ANGPT2	1332	0.653153	0.340841	0.00600601	0.521839	0.0091954	0.0176211	0.517084	1.88312	0.0060423
ANGPT4	662	0.6571	0.308157	0.0347432	0.468966	0.0528736	0.112745	0.445415	1.9163	0.0359937
ANGPTL1	381	0.435696	0.503937	0.0603675	1.15663	0.138554	0.119792	1.01587	0.772093	0.0642458
ANGPTL2	574	0.642857	0.336237	0.0209059	0.523035	0.0325203	0.0621762	0.506562	1.8	0.0213523
ANGPTL4	601	0.652246	0.314476	0.0332779	0.482143	0.0510204	0.10582	0.458738	1.8756	0.0344234
ANGPTL5	539	0.747681	0.215213	0.0371058	0.287841	0.0496278	0.172414	0.274232	2.96324	0.0385356
ANK1	2404	0.640183	0.351913	0.00790349	0.549708	0.0123457	0.0224586	0.543004	1.77919	0.00796646
ANK2	4422	0.690185	0.303935	0.00587969	0.440367	0.008519	0.0193452	0.436647	2.22774	0.00591447
ANK3	4566	0.672799	0.322602	0.00459921	0.479492	0.00683594	0.0142566	0.476237	2.05622	0.00462046
ANKAR	2469	0.699473	0.26772	0.0328068	0.382745	0.0469021	0.122542	0.365597	2.32749	0.0339196
ANKFN1	1392	0.688937	0.287356	0.0237069	0.417101	0.0344108	0.0825	0.403226	2.21478	0.0242826
ANKFY1	1388	0.636888	0.351585	0.0115274	0.552036	0.0180995	0.0327869	0.542222	1.75397	0.0116618
ANKH	689	0.580552	0.415094	0.00435414	0.715	0.0075	0.0104895	0.709677	1.38408	0.00437318
ANKHD1-EIF4EBP3	343	0.644315	0.326531	0.0291545	0.506787	0.0452489	0.0892857	0.484848	1.81148	0.03003
ANKIB1	877	0.68301	0.309008	0.00798176	0.452421	0.0116861	0.0258303	0.447195	2.15468	0.00804598
ANKK1	1169	0.668948	0.298546	0.0325064	0.446292	0.0485934	0.108883	0.42561	2.02067	0.0335986
ANKLE1	993	0.656596	0.312185	0.0312185	0.47546	0.047546	0.1	0.45388	1.91202	0.0322245
ANKLE2	1271	0.65775	0.324154	0.018096	0.492823	0.027512	0.0558252	0.479627	1.92184	0.0184295
ANKMY1	2006	0.669492	0.301595	0.0289133	0.450484	0.0431869	0.0958678	0.431834	2.02564	0.0297741
ANKRD11	4358	0.626434	0.358192	0.015374	0.571795	0.0245421	0.0429212	0.558098	1.6769	0.0156141
ANKRD12	2109	0.690375	0.297297	0.0123281	0.430632	0.0178571	0.0414673	0.423077	2.22971	0.012482
ANKRD13B	691	0.628075	0.354559	0.0173661	0.564516	0.0276498	0.0489796	0.549327	1.68872	0.017673
ANKRD13C	925	0.647568	0.340541	0.0118919	0.525876	0.0183639	0.0349206	0.516393	1.83742	0.012035
ANKRD13D	985	0.653807	0.336041	0.0101523	0.513975	0.015528	0.0302115	0.506116	1.88856	0.0102564
ANKRD17	2098	0.612965	0.383699	0.00333651	0.625972	0.00544323	0.00869565	0.622583	1.58374	0.00334768
ANKRD18A	1302	0.708141	0.256528	0.0353303	0.362256	0.0498915	0.137725	0.345041	2.42632	0.0366242
ANKRD18B	1173	0.70162	0.261722	0.0366581	0.373026	0.0522479	0.140065	0.354503	2.35143	0.0380531
ANKRD24	2302	0.669418	0.310599	0.0199826	0.463984	0.0298507	0.0643357	0.450536	2.02497	0.0203901
ANKRD26	2143	0.708353	0.259916	0.0317312	0.36693	0.0447958	0.122083	0.351198	2.4288	0.0327711
ANKRD27	1681	0.646044	0.325402	0.0285544	0.503683	0.0441989	0.0877514	0.482363	1.82521	0.0293938
ANKRD28	1354	0.915066	0.0753323	0.00960118	0.0823245	0.0104923	0.127451	0.0814696	10.7739	0.00969426
ANKRD30A	1924	0.702183	0.261954	0.0358628	0.373057	0.0510733	0.136905	0.35493	2.35777	0.0371968
ANKRD30B	1861	0.692101	0.268673	0.0392262	0.388199	0.056677	0.146	0.367377	2.24782	0.0408277
ANKRD31	1692	0.726359	0.244681	0.0289598	0.336859	0.0398698	0.118357	0.323944	2.65443	0.0298235
ANKRD33	718	0.643454	0.314763	0.0417827	0.489177	0.0649351	0.132743	0.45935	1.80469	0.0436047
ANKRD34A	501	0.618762	0.377246	0.00399202	0.609677	0.00645161	0.010582	0.605769	1.62304	0.00400802
ANKRD34B	535	0.695327	0.257944	0.046729	0.370968	0.0672043	0.181159	0.347607	2.28221	0.0490196
ANKRD34C	495	0.656566	0.333333	0.010101	0.507692	0.0153846	0.030303	0.5	1.91176	0.0102041
ANKRD35	1291	0.663052	0.29512	0.041828	0.445093	0.0630841	0.141732	0.418681	1.96782	0.043654
ANKRD36	2464	0.726055	0.235795	0.0381494	0.324762	0.0525433	0.16179	0.30855	2.65037	0.0396624
ANKRD36C	2505	0.720559	0.253892	0.0255489	0.352355	0.0354571	0.100629	0.340289	2.57857	0.0262188
ANKRD44	1071	0.67507	0.318394	0.00653595	0.471646	0.00968188	0.0205279	0.467123	2.07759	0.00657895
ANKRD50	1454	0.672627	0.314993	0.0123796	0.468303	0.0184049	0.0393013	0.459839	2.05462	0.0125348
ANKRD52	1067	0.585754	0.408622	0.00562324	0.6976	0.0096	0.0137615	0.690967	1.41403	0.00565504
ANKRD55	781	0.6863	0.279129	0.0345711	0.406716	0.0503731	0.123853	0.387211	2.18776	0.035809
ANKRD6	960	0.683333	0.286458	0.0302083	0.419207	0.0442073	0.105455	0.40146	2.15789	0.0311493
ANKS1A	1384	0.622832	0.364884	0.0122832	0.585847	0.0197216	0.0336634	0.574516	1.65134	0.012436
ANKS1B	1166	0.641509	0.346484	0.0120069	0.540107	0.0187166	0.0346535	0.530184	1.78947	0.0121528
ANKS3	1134	0.664903	0.319224	0.015873	0.480106	0.0238727	0.0497238	0.468912	1.98421	0.016129
ANKS4B	406	0.672414	0.29803	0.0295567	0.443223	0.043956	0.0991736	0.424561	2.05263	0.0304569
ANKS6	1228	0.683225	0.292345	0.02443	0.42789	0.0357569	0.0835655	0.413119	2.15681	0.0250417
ANKZF1	1066	0.67167	0.287054	0.0412758	0.427374	0.0614525	0.143791	0.402632	2.04571	0.0430528
ANLN	1218	0.729885	0.252874	0.0172414	0.346457	0.023622	0.0681818	0.338462	2.70213	0.0175439
ANO1	1182	0.626058	0.35956	0.0143824	0.574324	0.022973	0.04	0.561427	1.67421	0.0145923
ANO10	871	0.685419	0.273249	0.0413318	0.39866	0.0603015	0.151261	0.375987	2.17883	0.0431138
ANO2	1315	0.688213	0.28289	0.0288973	0.41105	0.041989	0.102151	0.394486	2.20732	0.0297572
ANO3	963	0.639668	0.312565	0.0477674	0.488636	0.0746753	0.152824	0.454683	1.77522	0.0501636
ANO4	1057	0.674551	0.292337	0.0331126	0.43338	0.0490884	0.113269	0.413102	2.07267	0.0342466
ANO5	1083	0.680517	0.266851	0.0526316	0.39213	0.0773406	0.197232	0.36398	2.13006	0.0555556
ANO6	1095	0.669406	0.292237	0.0383562	0.436562	0.0572988	0.13125	0.412903	2.02486	0.039886
ANO7	1761	0.62067	0.334469	0.0448609	0.538884	0.0722781	0.134126	0.50256	1.63623	0.0469679
ANO8	1598	0.576345	0.408636	0.0150188	0.709012	0.0260586	0.0367534	0.691005	1.36041	0.0152478
ANO9	1659	0.649789	0.328511	0.0216998	0.505566	0.0333952	0.066055	0.489228	1.85542	0.0221811
ANP32C	569	0.829525	0.1529	0.0175747	0.184322	0.0211864	0.114943	0.180498	4.86598	0.0178891
ANPEP	814	0.971744	0	0.0282555	0	0.0290771		0	34.3913	0.0290771
ANTXR1	689	0.626996	0.361393	0.011611	0.576389	0.0185185	0.0321285	0.565909	1.68093	0.0117474
ANTXR2	592	0.697635	0.280405	0.0219595	0.401937	0.031477	0.0783133	0.389671	2.30726	0.0224525
ANXA10	379	0.680739	0.282322	0.0369393	0.414729	0.0542636	0.130841	0.393382	2.13223	0.0383562
ANXA13	500	0.674	0.296	0.03	0.439169	0.0445104	0.101351	0.420455	2.06748	0.0309278
ANXA6	808	0.684406	0.29703	0.0185644	0.433996	0.0271248	0.0625	0.422535	2.16863	0.0189155
AOAH	883	0.670442	0.293318	0.0362401	0.4375	0.0540541	0.123552	0.415064	2.03436	0.0376028
AOC2	1030	0.681553	0.287379	0.031068	0.421652	0.045584	0.108108	0.40327	2.14024	0.0320641
AOC3	1047	0.65043	0.320917	0.0286533	0.493392	0.0440529	0.0892857	0.472574	1.86066	0.0294985
AOX1	1590	0.701258	0.267925	0.0308176	0.382063	0.0439462	0.115023	0.365979	2.34737	0.0317975
AP1B1	1015	0.585222	0.410837	0.00394089	0.70202	0.00673401	0.00959233	0.697324	1.41093	0.00395648
AP1G1	738	0.630081	0.363144	0.00677507	0.576344	0.0107527	0.0186567	0.570213	1.7033	0.00682128
AP1G2	1291	0.678544	0.29512	0.0263362	0.434932	0.0388128	0.0892388	0.418681	2.11084	0.0270485
AP1M1	388	0.502577	0.481959	0.0154639	0.958974	0.0307692	0.0320856	0.930348	1.01036	0.0157068
AP2A1	1233	0.583942	0.407137	0.00892133	0.697222	0.0152778	0.0219124	0.686731	1.40351	0.00900164
AP2A2	1000	0.589	0.406	0.005	0.689304	0.00848896	0.0123153	0.683502	1.43309	0.00502513
AP2M1	271	0.402214	0.597786	0	1.48624	0	0	1.48624	0.67284	0
AP3B1	1072	0.705224	0.277052	0.0177239	0.392857	0.0251323	0.0639731	0.383226	2.39241	0.0180437
AP3B2	1209	0.645161	0.340778	0.0140612	0.528205	0.0217949	0.0412621	0.516939	1.81818	0.0142617
AP3D1	1520	0.617763	0.373684	0.00855263	0.604899	0.0138445	0.0228873	0.596639	1.61618	0.00862641
AP4B1	1002	0.695609	0.277445	0.0269461	0.398852	0.0387374	0.0971223	0.383978	2.28525	0.0276923
AP4E1	1184	0.6875	0.294764	0.0177365	0.428747	0.0257985	0.0601719	0.417964	2.2	0.0180567
AP4M1	985	0.647716	0.327919	0.0243655	0.50627	0.0376176	0.0743034	0.487915	1.83862	0.024974
AP5B1	1376	0.631541	0.345203	0.0232558	0.546605	0.0368239	0.0673684	0.527192	1.714	0.0238095
APAF1	1342	0.687034	0.292846	0.0201192	0.426247	0.0292842	0.0687023	0.41412	2.19524	0.0205323
APBA1	1089	0.61708	0.372819	0.010101	0.604167	0.016369	0.0270936	0.594436	1.61151	0.0102041
APBA2	928	0.630388	0.359914	0.00969828	0.57094	0.0153846	0.0269461	0.56229	1.70554	0.00979325
APBB1	829	0.655006	0.332931	0.0120627	0.508287	0.0184162	0.0362319	0.499096	1.8986	0.01221
APBB1IP	749	0.65287	0.341789	0.00534045	0.523517	0.00817996	0.015625	0.51927	1.88077	0.00536913
APBB2	794	0.634761	0.352645	0.0125945	0.555556	0.0198413	0.0357143	0.544747	1.73793	0.0127551
APBB3	814	0.660934	0.321867	0.017199	0.486989	0.0260223	0.0534351	0.474638	1.94928	0.0175
APC	5738	0.690659	0.261938	0.0474033	0.379258	0.0686349	0.180971	0.3549	2.23268	0.0497622
APC2	3745	0.640053	0.353004	0.00694259	0.551523	0.0108469	0.0196672	0.545605	1.77819	0.00699113
APCDD1	786	0.66285	0.319338	0.0178117	0.481766	0.0268714	0.0557769	0.469159	1.96604	0.0181347
APCDD1L	795	0.665409	0.316981	0.0176101	0.476371	0.026465	0.0555556	0.464088	1.98872	0.0179257
APCS	323	0.640867	0.312693	0.0464396	0.487923	0.0724638	0.148515	0.454955	1.78448	0.0487013
APEH	1031	0.645975	0.316198	0.0378274	0.489489	0.0585586	0.119632	0.462411	1.82466	0.0393145
APEX2	490	0.689796	0.308163	0.00204082	0.446746	0.00295858	0.00662252	0.445428	2.22368	0.00204499
APLNR	523	0.627151	0.367113	0.00573614	0.585366	0.00914634	0.015625	0.58006	1.68205	0.00576923
APLP1	827	0.636034	0.350665	0.0133011	0.551331	0.0209125	0.037931	0.540037	1.74751	0.0134804
APLP2	986	0.707911	0.279919	0.0121704	0.395415	0.017192	0.0434783	0.388732	2.42361	0.0123203
APOA4	627	0.661882	0.30622	0.0318979	0.462651	0.0481928	0.104167	0.441379	1.95755	0.0329489
APOA5	846	0.682033	0.300236	0.0177305	0.440208	0.0259965	0.0590551	0.429054	2.14498	0.0180505
APOB	5970	0.69263	0.288275	0.0190955	0.416203	0.0275695	0.0662406	0.405036	2.25341	0.0194672
APOBR	1518	0.661397	0.310935	0.027668	0.47012	0.0418327	0.0889831	0.451243	1.95331	0.0284553
APOH	480	0.710417	0.264583	0.025	0.372434	0.0351906	0.0944882	0.359773	2.45324	0.025641
APOL5	579	0.677029	0.283247	0.0397237	0.418367	0.0586735	0.140244	0.395181	2.09626	0.0413669
APP	890	0.670787	0.31573	0.0134831	0.470687	0.0201005	0.0427046	0.461412	2.03754	0.0136674
APPBP2	412	0.575243	0.417476	0.00728155	0.725738	0.0126582	0.0174419	0.716667	1.35429	0.00733496
APPL1	766	0.715405	0.265013	0.0195822	0.370438	0.0273723	0.0738916	0.360568	2.51376	0.0199734
APPL2	750	0.68	0.286667	0.0333333	0.421569	0.0490196	0.116279	0.401869	2.125	0.0344828
AQP10	459	0.607843	0.374728	0.0174292	0.616487	0.0286738	0.0465116	0.599303	1.55	0.0177384
AQP7	584	0.669521	0.291096	0.0393836	0.434783	0.0588235	0.135294	0.410628	2.02591	0.0409982
AQP8	307	0.638436	0.345277	0.0162866	0.540816	0.0255102	0.0471698	0.527363	1.76577	0.0165563
AQR	1206	0.645937	0.341625	0.0124378	0.528883	0.0192555	0.0364078	0.518892	1.82436	0.0125945
AR	1008	0.655754	0.3125	0.031746	0.476551	0.0484115	0.101587	0.454545	1.9049	0.0327869
ARAF	469	0.588486	0.398721	0.0127932	0.677536	0.0217391	0.0320856	0.663121	1.43005	0.012959
ARAP1	1814	0.64333	0.341786	0.0148842	0.531277	0.0231362	0.0435484	0.519263	1.80371	0.0151091
ARAP2	1916	0.730167	0.251566	0.0182672	0.344532	0.0250179	0.0726141	0.336123	2.706	0.0186071
ARAP3	1770	0.675141	0.310169	0.0146893	0.459414	0.0217573	0.0473588	0.449631	2.07826	0.0149083
ARC	483	0.581781	0.399586	0.0186335	0.686833	0.0320285	0.0466321	0.665517	1.39109	0.0189873
ARFGAP2	1073	0.699907	0.28425	0.0158434	0.406125	0.0226365	0.0557377	0.397135	2.3323	0.0160985
ARFGEF1	1288	0.614907	0.376553	0.00854037	0.612374	0.0138889	0.0226804	0.603985	1.59677	0.00861394
ARFGEF2	1605	0.671651	0.317757	0.0105919	0.473098	0.0157699	0.0333333	0.465753	2.04554	0.0107053
ARHGAP10	929	0.68676	0.292788	0.0204521	0.426332	0.0297806	0.0698529	0.414003	2.19244	0.0208791
ARHGAP11A	1060	0.717925	0.251887	0.0301887	0.350854	0.0420499	0.11985	0.336696	2.54515	0.0311284
ARHGAP12	853	0.688159	0.288394	0.0234467	0.41908	0.0340716	0.0813008	0.405272	2.20677	0.0240096
ARHGAP15	640	0.70625	0.267188	0.0265625	0.378319	0.0376106	0.0994152	0.364606	2.40426	0.0272873
ARHGAP17	998	0.673347	0.315631	0.011022	0.46875	0.016369	0.0349206	0.461201	2.06135	0.0111449
ARHGAP18	754	0.68435	0.28382	0.0318302	0.414729	0.0465116	0.11215	0.396296	2.16807	0.0328767
ARHGAP20	1195	0.688703	0.295397	0.0158996	0.428919	0.0230863	0.0538244	0.41924	2.21237	0.0161565
ARHGAP21	2125	0.667294	0.316235	0.0164706	0.473907	0.0246827	0.0520833	0.462491	2.00566	0.0167464
ARHGAP22	1382	0.668596	0.314761	0.0166425	0.470779	0.0248918	0.0528736	0.459345	2.01747	0.0169242
ARHGAP24	905	0.689503	0.283978	0.0265193	0.411859	0.0384615	0.0933852	0.396605	2.22064	0.0272418
ARHGAP25	770	0.698701	0.281818	0.0194805	0.403346	0.027881	0.0691244	0.392405	2.31897	0.0198675
ARHGAP26	970	0.628866	0.349485	0.0216495	0.555738	0.0344262	0.0619469	0.537242	1.69444	0.0221286
ARHGAP27	1354	0.648449	0.330133	0.021418	0.509112	0.0330296	0.064877	0.492834	1.84454	0.0218868
ARHGAP28	875	0.672	0.301714	0.0262857	0.44898	0.0391156	0.0871212	0.432079	2.04878	0.0269953
ARHGAP29	1173	0.712702	0.2711	0.0161978	0.380383	0.0227273	0.0597484	0.37193	2.48071	0.0164645
ARHGAP30	1392	0.696839	0.298132	0.00502874	0.427835	0.00721649	0.0168675	0.42477	2.29858	0.00505415
ARHGAP31	1512	0.693122	0.297619	0.00925926	0.429389	0.0133588	0.0311111	0.423729	2.25862	0.00934579
ARHGAP32	2156	0.673006	0.316327	0.0106679	0.470021	0.0158511	0.0337243	0.462687	2.05816	0.0107829
ARHGAP33	1857	0.641357	0.344642	0.0140011	0.537364	0.0218304	0.040625	0.525883	1.78829	0.0141999
ARHGAP35	1264	0.640032	0.35443	0.00553797	0.55377	0.00865266	0.015625	0.54902	1.77802	0.00556881
ARHGAP36	405	0.750617	0.246914	0.00246914	0.328947	0.00328947	0.01	0.327869	3.0099	0.00247525
ARHGAP39	1843	0.628866	0.358112	0.0130222	0.569456	0.0207075	0.0363636	0.557904	1.69444	0.0131941
ARHGAP4	1033	0.629235	0.363988	0.00677638	0.578462	0.0107692	0.018617	0.572298	1.69713	0.00682261
ARHGAP40	742	0.649596	0.322102	0.0283019	0.495851	0.0435685	0.0878661	0.475149	1.85385	0.0291262
ARHGAP42	673	0.628529	0.356612	0.0148588	0.567376	0.0236407	0.0416667	0.554273	1.692	0.015083
ARHGAP44	884	0.597285	0.391403	0.0113122	0.655303	0.0189394	0.0289017	0.643123	1.48315	0.0114416
ARHGAP5	1323	0.667423	0.321995	0.010582	0.482446	0.015855	0.0328638	0.474916	2.00682	0.0106952
ARHGAP6	1022	0.625245	0.3591	0.0156556	0.574335	0.0250391	0.0435967	0.560305	1.66841	0.0159046
ARHGAP9	1576	0.695431	0.281091	0.0234772	0.404197	0.0337591	0.0835214	0.390997	2.28333	0.0240416
ARHGEF1	1053	0.630579	0.351377	0.0180437	0.557229	0.0286145	0.0513514	0.541728	1.70694	0.0183752
ARHGEF10	2246	0.67008	0.304541	0.0253785	0.454485	0.0378738	0.0833333	0.4379	2.03104	0.0260393
ARHGEF10L	1730	0.634104	0.355491	0.0104046	0.56062	0.0164084	0.0292683	0.55157	1.73302	0.010514
ARHGEF11	2254	0.699201	0.295475	0.00532387	0.422589	0.00761421	0.018018	0.419395	2.32448	0.00535236
ARHGEF12	1284	0.686137	0.304517	0.00934579	0.443814	0.0136209	0.0306905	0.43785	2.1861	0.00943396
ARHGEF15	1143	0.67629	0.309711	0.0139983	0.457956	0.0206986	0.0451977	0.448669	2.08919	0.014197
ARHGEF16	963	0.645898	0.331256	0.0228453	0.512862	0.0353698	0.0689655	0.495342	1.82405	0.0233794
ARHGEF17	2852	0.665849	0.322581	0.0115708	0.484466	0.0173776	0.0358696	0.47619	1.99265	0.0117063
ARHGEF18	2053	0.645397	0.338042	0.0165611	0.523774	0.0256604	0.0489914	0.51067	1.82005	0.01684
ARHGEF19	1045	0.661244	0.302392	0.0363636	0.457308	0.0549928	0.120253	0.433471	1.95198	0.0377358
ARHGEF2	1117	0.622202	0.359893	0.0179051	0.578417	0.028777	0.0497512	0.562238	1.64692	0.0182315
ARHGEF25	873	0.670103	0.305842	0.024055	0.45641	0.0358974	0.0786517	0.440594	2.03125	0.0246479
ARHGEF26	1247	0.668805	0.304731	0.0264635	0.455635	0.0395683	0.0868421	0.438293	2.01937	0.0271829
ARHGEF3	916	0.648472	0.319869	0.0316594	0.493266	0.0488215	0.0989761	0.470305	1.84472	0.0326945
ARHGEF33	1436	0.657382	0.331476	0.0111421	0.504237	0.0169492	0.0336134	0.495833	1.9187	0.0112676
ARHGEF37	839	0.707986	0.261025	0.0309893	0.368687	0.043771	0.118721	0.353226	2.42449	0.0319803
ARHGEF4	2348	0.668654	0.310477	0.0208688	0.464331	0.0312102	0.0672154	0.450278	2.01799	0.0213136
ARHGEF40	1939	0.659618	0.317174	0.0232078	0.480844	0.0351837	0.0731707	0.464502	1.93788	0.0237592
ARHGEF5	1560	0.698718	0.262179	0.0391026	0.375229	0.0559633	0.149144	0.355343	2.31915	0.0406938
ARHGEF6	515	0.675728	0.31068	0.0135922	0.45977	0.0201149	0.04375	0.450704	2.08383	0.0137795
ARHGEF7	938	0.616205	0.376333	0.00746269	0.610727	0.0121107	0.01983	0.603419	1.60556	0.0075188
ARHGEF9	315	0.555556	0.422222	0.0222222	0.76	0.04	0.0526316	0.730769	1.25	0.0227273
ARID1A	2504	0.623403	0.36901	0.00758786	0.591928	0.0121717	0.0205628	0.58481	1.65536	0.00764588
ARID1B	3270	0.561468	0.297248	0.141284	0.529412	0.251634	0.475309	0.422977	1.28033	0.16453
ARID2	1698	0.645465	0.339223	0.0153121	0.525547	0.0237226	0.0451389	0.513369	1.8206	0.0155502
ARID3A	850	0.601176	0.389412	0.00941176	0.64775	0.0156556	0.0241692	0.637765	1.50737	0.00950119
ARID3B	615	0.656911	0.331707	0.0113821	0.50495	0.0173267	0.0343137	0.49635	1.91469	0.0115132
ARID3C	861	0.708479	0.270616	0.0209059	0.381967	0.0295082	0.0772532	0.371019	2.43028	0.0213523
ARID4A	1208	0.692881	0.293046	0.0140728	0.422939	0.0203106	0.0480226	0.41452	2.25606	0.0142737
ARID4B	1126	0.702487	0.28952	0.0079929	0.412137	0.011378	0.0276074	0.4075	2.36119	0.0080573
ARID5A	754	0.647215	0.340849	0.0119363	0.526639	0.0184426	0.0350195	0.517103	1.83459	0.0120805
ARID5B	1148	0.650697	0.344948	0.0043554	0.53012	0.00669344	0.0126263	0.526596	1.86284	0.00437445
ARIH2	398	0.565327	0.414573	0.0201005	0.733333	0.0355556	0.0484848	0.708155	1.30058	0.0205128
ARMC2	1072	0.653918	0.324627	0.0214552	0.496434	0.0328103	0.066092	0.480663	1.88949	0.0219256
ARMC3	921	0.716612	0.247557	0.0358306	0.345455	0.05	0.144737	0.329004	2.52874	0.0371622
ARMC4	1290	0.685271	0.277519	0.0372093	0.404977	0.0542986	0.134078	0.38412	2.17734	0.0386473
ARMC5	1668	0.621103	0.363309	0.0155875	0.584942	0.0250965	0.0429043	0.570621	1.63924	0.0158343
ARMC6	640	0.66875	0.301563	0.0296875	0.450935	0.0443925	0.0984456	0.431767	2.01887	0.0305958
ARMC8	664	0.637048	0.356928	0.0060241	0.560284	0.00945626	0.0168776	0.555035	1.75519	0.00606061
ARMC9	1316	0.655015	0.31307	0.0319149	0.477958	0.0487239	0.101942	0.455752	1.89868	0.032967
ARMCX1	263	0.604563	0.380228	0.0152091	0.628931	0.0251572	0.04	0.613497	1.52885	0.015444
ARMCX2	437	0.622426	0.375286	0.00228833	0.602941	0.00367647	0.00609756	0.600733	1.64848	0.00229358
ARMCX5	371	0.708895	0.272237	0.0188679	0.38403	0.026616	0.0693069	0.374074	2.43519	0.0192308
ARNT	774	0.670543	0.321705	0.00775194	0.479769	0.0115607	0.0240964	0.474286	2.03529	0.0078125
ARNT2	723	0.648686	0.341632	0.00968188	0.526652	0.0149254	0.0283401	0.518908	1.84646	0.00977654
ARNTL	559	0.642218	0.345259	0.0125224	0.537604	0.0194986	0.0362694	0.527322	1.795	0.0126812
ARNTL2	662	0.708459	0.26435	0.0271903	0.373134	0.0383795	0.102857	0.359343	2.43005	0.0279503
ARPP21	981	0.686035	0.293578	0.0203874	0.427935	0.0297177	0.0694444	0.415584	2.18506	0.0208117
ARRB1	494	0.605263	0.388664	0.00607287	0.64214	0.0100334	0.015625	0.635762	1.53333	0.00610998
ARSB	789	0.688213	0.269962	0.0418251	0.392265	0.0607735	0.15493	0.369792	2.20732	0.0436508
ARSD	670	0.661194	0.31791	0.0208955	0.480813	0.0316027	0.0657277	0.466083	1.95154	0.0213415
ARSF	623	0.630819	0.337079	0.0321027	0.534351	0.0508906	0.0952381	0.508475	1.7087	0.0331675
ARSG	2007	0.661684	0.327354	0.0109616	0.494729	0.0165663	0.0334855	0.486667	1.95582	0.0110831
ARSH	509	0.697446	0.267191	0.0353635	0.383099	0.0507042	0.132353	0.364611	2.30519	0.0366599
ARSI	739	0.656292	0.305819	0.037889	0.465979	0.057732	0.123894	0.440546	1.90945	0.0393812
ARSJ	634	0.62776	0.323344	0.0488959	0.515075	0.0778894	0.15122	0.477855	1.68644	0.0514096
ARVCF	1937	0.669592	0.314404	0.0160041	0.469545	0.0239013	0.0509031	0.458584	2.02656	0.0162644
ASAP1	1040	0.606731	0.384615	0.00865385	0.633914	0.0142631	0.0225	0.625	1.54279	0.00872939
ASAP2	1186	0.631535	0.360034	0.0084317	0.570093	0.0133511	0.0234192	0.562582	1.71396	0.0085034
ASAP3	1087	0.685373	0.290708	0.023919	0.424161	0.0348993	0.0822785	0.409857	2.17836	0.0245052
ASB10	840	0.666667	0.303571	0.0297619	0.455357	0.0446429	0.0980392	0.435897	2	0.0306748
ASB15	730	0.694521	0.267123	0.0383562	0.384615	0.0552268	0.14359	0.364486	2.27354	0.039886
ASB17	313	0.686901	0.277955	0.0351438	0.404651	0.0511628	0.126437	0.384956	2.19388	0.0364238
ASB2	968	0.649793	0.320248	0.0299587	0.492846	0.0461049	0.0935484	0.471125	1.85546	0.0308839
ASB3	900	0.697778	0.27	0.0322222	0.386943	0.0461783	0.119342	0.369863	2.30882	0.0332951
ASB4	556	0.697842	0.27518	0.0269784	0.39433	0.0386598	0.0980392	0.379653	2.30952	0.0277264
ASB5	439	0.669704	0.289294	0.0410023	0.431973	0.0612245	0.141732	0.407051	2.02759	0.0427553
ASCC2	927	0.682848	0.300971	0.0161812	0.440758	0.0236967	0.0537634	0.430556	2.15306	0.0164474
ASCC3	2171	0.678029	0.293413	0.0285583	0.432745	0.0421196	0.0973312	0.415254	2.10587	0.0293978
ASH1L	2678	0.690814	0.302838	0.00634802	0.438378	0.00918919	0.0209618	0.434387	2.2343	0.00638858
ASH2L	537	0.64432	0.340782	0.0148976	0.528902	0.0231214	0.0437158	0.516949	1.81152	0.0151229
ASL	610	0.632787	0.339344	0.0278689	0.536269	0.0440415	0.0821256	0.513648	1.72321	0.0286678
ASMT	597	0.680067	0.288107	0.0318258	0.423645	0.046798	0.110465	0.404706	2.12565	0.032872
ASMTL	1040	0.625962	0.361538	0.0125	0.577573	0.0199693	0.0345745	0.566265	1.67352	0.0126582
ASNS	524	0.69084	0.270992	0.0381679	0.392265	0.0552486	0.140845	0.371728	2.23457	0.0396825
ASNSD1	731	0.686731	0.27223	0.0410397	0.396414	0.059761	0.150754	0.37406	2.19214	0.042796
ASPG	1180	0.633898	0.338983	0.0271186	0.534759	0.0427807	0.08	0.512821	1.73148	0.0278746
ASPH	1137	0.691293	0.277924	0.0307828	0.402036	0.0445293	0.110759	0.384896	2.23932	0.0317604
ASPHD1	1158	0.638169	0.345423	0.0164076	0.541272	0.0257104	0.0475	0.527704	1.76372	0.0166813
ASPM	3953	0.705034	0.255755	0.0392107	0.362756	0.0556154	0.153314	0.343644	2.39022	0.040811
ASPRV1	444	0.646396	0.335586	0.018018	0.519164	0.0278746	0.0536913	0.505085	1.82803	0.0183486
ASPSCR1	1135	0.651982	0.330396	0.0176211	0.506757	0.027027	0.0533333	0.493421	1.87342	0.0179372
ASS1	550	0.634545	0.336364	0.0290909	0.530086	0.0458453	0.0864865	0.506849	1.73632	0.0299625
ASTE1	382	0.651832	0.308901	0.039267	0.473896	0.060241	0.127119	0.44697	1.87218	0.0408719
ASTL	1361	0.68626	0.296106	0.0176341	0.431478	0.0256959	0.0595533	0.420668	2.18735	0.0179506
ASTN1	1497	0.667335	0.319973	0.0126921	0.479479	0.019019	0.039666	0.47053	2.00602	0.0128552
ASTN2	1746	0.646048	0.34307	0.010882	0.531028	0.016844	0.0317195	0.522232	1.82524	0.0110017
ASXL1	1920	0.655208	0.290625	0.0541667	0.443561	0.0826709	0.18638	0.409692	1.9003	0.0572687
ASXL2	1401	0.669522	0.324054	0.00642398	0.484009	0.00959488	0.0198238	0.479409	2.02592	0.00646552
ASXL3	2484	0.692834	0.290258	0.0169082	0.418942	0.0244044	0.0582524	0.408962	2.25557	0.017199
ASZ1	529	0.731569	0.245747	0.0226843	0.335917	0.0310078	0.0923077	0.325815	2.72535	0.0232108
ATAD2	1349	0.677539	0.309859	0.0126019	0.45733	0.0185996	0.0406699	0.44898	2.10115	0.0127628
ATAD2B	1318	0.666161	0.322458	0.0113809	0.484055	0.0170843	0.0352941	0.475924	1.99545	0.0115119
ATAD3A	1026	0.64425	0.327485	0.0282651	0.508321	0.0438729	0.0863095	0.486957	1.81096	0.0290873
ATAD3B	1495	0.665552	0.305686	0.0287625	0.459296	0.0432161	0.0940919	0.44027	1.99	0.0296143
ATAD5	1581	0.716635	0.275142	0.00822264	0.383936	0.011474	0.0298851	0.379581	2.52902	0.00829082
ATCAY	445	0.608989	0.377528	0.0134831	0.619926	0.0221402	0.0357143	0.606498	1.55747	0.0136674
ATE1	685	0.651095	0.327007	0.0218978	0.502242	0.0336323	0.0669643	0.4859	1.86611	0.0223881
ATF2	414	0.625604	0.357488	0.0169082	0.571429	0.027027	0.0472973	0.556391	1.67097	0.017199
ATF6	770	0.672727	0.303896	0.0233766	0.451737	0.034749	0.0769231	0.436567	2.05556	0.0239362
ATF6B	1038	0.665703	0.299615	0.0346821	0.450072	0.0520984	0.115756	0.427785	1.99135	0.0359281
ATF7	497	0.657948	0.334004	0.00804829	0.507645	0.0122324	0.0240964	0.501511	1.92353	0.00811359
ATF7IP	1252	0.698083	0.294728	0.0071885	0.422197	0.0102975	0.0243902	0.417894	2.31217	0.00724055
ATF7IP2	931	0.703545	0.28464	0.0118153	0.40458	0.0167939	0.0415094	0.397898	2.37319	0.0119565
ATG14	601	0.697171	0.28619	0.0166389	0.410501	0.0238663	0.0581395	0.400932	2.3022	0.0169205
ATG16L1	559	0.613596	0.366726	0.019678	0.597668	0.03207	0.0536585	0.579096	1.58796	0.020073
ATG2A	2575	0.65165	0.335534	0.0128155	0.514899	0.0196663	0.0381944	0.504968	1.87068	0.0129819
ATG2B	2153	0.689735	0.294008	0.0162564	0.426263	0.023569	0.0552923	0.416447	2.22305	0.016525
ATG4D	692	0.679191	0.300578	0.0202312	0.442553	0.0297872	0.0673077	0.429752	2.11712	0.020649
ATG7	1466	0.645975	0.341064	0.0129604	0.527983	0.0200634	0.038	0.517598	1.82466	0.0131306
ATG9A	787	0.612452	0.378653	0.00889454	0.618257	0.0145228	0.0234899	0.609407	1.58033	0.00897436
ATIC	759	0.693017	0.280632	0.0263505	0.404943	0.0380228	0.0938967	0.39011	2.25751	0.0270636
ATL1	482	0.639004	0.346473	0.0145228	0.542208	0.0227273	0.0419162	0.530159	1.77011	0.0147368
ATM	8933	0.703123	0.259263	0.0376133	0.368731	0.0534947	0.145078	0.350008	2.3684	0.0390834
ATMIN	1020	0.686275	0.302941	0.0107843	0.441429	0.0157143	0.0355987	0.434599	2.1875	0.0109019
ATN1	1560	0.660256	0.333974	0.00576923	0.505825	0.00873786	0.0172745	0.501444	1.9434	0.00580271
ATP10A	2054	0.655794	0.329601	0.0146056	0.502598	0.0222717	0.0443131	0.491649	1.90523	0.0148221
ATP10B	2002	0.687812	0.278721	0.0334665	0.405229	0.0486565	0.120072	0.386427	2.2032	0.0346253
ATP10D	1530	0.696078	0.279739	0.024183	0.401878	0.0347418	0.0864486	0.388385	2.29032	0.0247823
ATP11A	1572	0.648219	0.339695	0.0120865	0.524043	0.0186457	0.0355805	0.514451	1.84268	0.0122344
ATP11B	1185	0.661603	0.31308	0.0253165	0.473214	0.0382653	0.0808625	0.455774	1.95511	0.025974
ATP11C	716	0.663408	0.311453	0.0251397	0.469474	0.0378947	0.0807175	0.452333	1.97095	0.025788
ATP12A	1191	0.665827	0.316541	0.0176322	0.47541	0.0264817	0.0557029	0.463145	1.99246	0.0179487
ATP13A1	1574	0.611182	0.378653	0.0101652	0.619543	0.016632	0.0268456	0.609407	1.5719	0.0102696
ATP13A2	1726	0.636732	0.340672	0.0225956	0.535032	0.0354868	0.0663265	0.516696	1.75279	0.023118
ATP13A3	1067	0.669166	0.322399	0.00843486	0.481793	0.012605	0.0261628	0.475795	2.02266	0.00850662
ATP13A4	1316	0.699088	0.276596	0.0243161	0.395652	0.0347826	0.0879121	0.382353	2.32323	0.0249221
ATP13A5	1630	0.695092	0.269325	0.0355828	0.387467	0.0511915	0.132118	0.368598	2.27968	0.0368957
ATP1A1	731	0.421341	0.571819	0.00683995	1.35714	0.0162338	0.0119617	1.33546	0.728132	0.00688705
ATP1A2	915	0.546448	0.437158	0.0163934	0.8	0.03	0.0375	0.776699	1.20482	0.0166667
ATP1A3	892	0.51009	0.484305	0.00560538	0.949451	0.010989	0.0115741	0.93913	1.04119	0.00563698
ATP1A4	1272	0.66195	0.310535	0.0275157	0.469121	0.0415677	0.0886076	0.450399	1.95814	0.0282943
ATP1B4	338	0.680473	0.295858	0.0236686	0.434783	0.0347826	0.08	0.420168	2.12963	0.0242424
ATP2A1	1259	0.594122	0.380461	0.025417	0.640374	0.0427807	0.0668058	0.614103	1.4638	0.0260799
ATP2A2	951	0.452156	0.537329	0.0105152	1.18837	0.0232558	0.0195695	1.16136	0.825336	0.010627
ATP2A3	1591	0.598366	0.384035	0.017599	0.641807	0.0294118	0.0458265	0.623469	1.48983	0.0179143
ATP2B1	803	0.606476	0.388543	0.00498132	0.640657	0.00821355	0.0128205	0.635438	1.54114	0.00500626
ATP2B2	1292	0.5387	0.45743	0.00386997	0.849138	0.00718391	0.00846024	0.843081	1.16779	0.003885
ATP2B3	1189	0.611438	0.380151	0.00841043	0.621733	0.0137552	0.0221239	0.613297	1.57359	0.00848176
ATP2B4	1273	0.656716	0.329929	0.0133543	0.502392	0.0203349	0.0404762	0.49238	1.91304	0.013535
ATP2C1	804	0.639303	0.344527	0.0161692	0.538911	0.0252918	0.0469314	0.525617	1.77241	0.0164349
ATP2C2	2163	0.672677	0.299122	0.0282016	0.444674	0.0419244	0.0942813	0.426781	2.05508	0.02902
ATP4A	1193	0.614417	0.367142	0.0184409	0.597544	0.0300136	0.0502283	0.580132	1.59348	0.0187874
ATP6AP1	510	0.635294	0.358824	0.00588235	0.564815	0.00925926	0.0163934	0.559633	1.74194	0.00591716
ATP6V0A1	734	0.607629	0.384196	0.00817439	0.632287	0.0134529	0.0212766	0.623894	1.54861	0.00824176
ATP6V0A2	976	0.661885	0.314549	0.0235656	0.475232	0.0356037	0.0749186	0.458894	1.95758	0.0241343
ATP6V0A4	1200	0.6625	0.313333	0.0241667	0.472956	0.036478	0.0771277	0.456311	1.96296	0.0247652
ATP6V0D2	444	0.707207	0.265766	0.027027	0.375796	0.0382166	0.101695	0.361963	2.41538	0.0277778
ATP6V1A	467	0.62955	0.357602	0.012848	0.568027	0.0204082	0.0359281	0.556667	1.69942	0.0130152
ATP6V1B1	739	0.665765	0.294993	0.0392422	0.443089	0.0589431	0.133028	0.418426	1.9919	0.0408451
ATP6V1B2	492	0.589431	0.396341	0.0142276	0.672414	0.0241379	0.0358974	0.656566	1.43564	0.014433
ATP6V1C2	682	0.658358	0.318182	0.0234604	0.483296	0.0356347	0.0737327	0.466667	1.92704	0.024024
ATP6V1H	473	0.693446	0.272727	0.0338266	0.393293	0.0487805	0.124031	0.375	2.26207	0.0350109
ATP7A	1265	0.717787	0.242688	0.0395257	0.338106	0.0550661	0.162866	0.320459	2.54342	0.0411523
ATP7B	2090	0.700957	0.266986	0.0320574	0.380887	0.0457338	0.120072	0.36423	2.344	0.0331191
ATP8A1	1061	0.63148	0.351555	0.0169651	0.556716	0.0268657	0.0482574	0.542151	1.71355	0.0172579
ATP8A2	1284	0.649533	0.32243	0.0280374	0.496403	0.0431655	0.0869565	0.475862	1.85333	0.0288462
ATP8B1	1332	0.663664	0.311562	0.0247748	0.469457	0.0373303	0.0795181	0.452563	1.97321	0.0254042
ATP8B2	1234	0.641815	0.341167	0.0170178	0.531566	0.0265152	0.0498812	0.517835	1.79186	0.0173124
ATP8B3	1983	0.665658	0.308623	0.0257186	0.463636	0.0386364	0.0833333	0.446389	1.99095	0.0263975
ATP8B4	1396	0.698424	0.260029	0.0415473	0.372308	0.0594872	0.15978	0.351404	2.31591	0.0433483
ATP9A	1042	0.549904	0.434741	0.0153551	0.790576	0.0279232	0.0353201	0.7691	1.22175	0.0155945
ATP9B	1969	0.664297	0.31031	0.0253936	0.467125	0.0382263	0.0818331	0.449926	1.97882	0.0260552
ATR	2210	0.644796	0.331222	0.0239819	0.513684	0.037193	0.0724044	0.495264	1.81529	0.0245712
ATRIP	2210	0.661538	0.328054	0.0104072	0.495896	0.0157319	0.0317241	0.488215	1.95455	0.0105167
ATRN	1402	0.655492	0.332382	0.0121255	0.507073	0.0184984	0.0364807	0.497863	1.90269	0.0122744
ATRNL1	1443	0.677755	0.299376	0.022869	0.441718	0.0337423	0.0763889	0.4273	2.10323	0.0234043
ATRX	1609	0.666252	0.321939	0.0118086	0.483209	0.0177239	0.0366795	0.474794	1.99628	0.0119497
ATXN1	1277	0.602193	0.376664	0.0211433	0.625488	0.0351105	0.0561331	0.604271	1.51378	0.0216
ATXN2	1158	0.663212	0.322107	0.0146805	0.485677	0.0221354	0.0455764	0.475159	1.96923	0.0148992
ATXN2L	1436	0.616295	0.377437	0.00626741	0.612429	0.0101695	0.0166052	0.606264	1.60617	0.00630694
ATXN7	1286	0.693624	0.300933	0.00544323	0.433857	0.00784753	0.0180879	0.430478	2.26396	0.00547303
ATXN7L1	1265	0.667984	0.320949	0.0110672	0.480473	0.016568	0.0344828	0.472643	2.0119	0.011191
ATXN7L2	995	0.662312	0.331658	0.00603015	0.500759	0.0091047	0.0181818	0.496241	1.96131	0.00606673
AURKA	401	0.63591	0.349127	0.0149626	0.54902	0.0235294	0.0428571	0.536398	1.74658	0.0151899
AURKB	470	0.665957	0.314894	0.0191489	0.472843	0.028754	0.0608108	0.459627	1.99363	0.0195228
AURKC	336	0.672619	0.297619	0.0297619	0.442478	0.0442478	0.1	0.423729	2.05455	0.0306748
AUTS2	1624	0.64101	0.351601	0.00738916	0.548511	0.0115274	0.0210158	0.54226	1.78559	0.00744417
AVIL	1212	0.694719	0.275578	0.029703	0.396675	0.0427553	0.107784	0.38041	2.27568	0.0306122
AVPR1A	581	0.672978	0.302926	0.0240964	0.450128	0.0358056	0.0795455	0.434568	2.05789	0.0246914
AVPR1B	593	0.684654	0.291737	0.0236088	0.426108	0.0344828	0.0809249	0.411905	2.17112	0.0241796
AXDND1	1401	0.684511	0.282655	0.0328337	0.41293	0.0479666	0.116162	0.39403	2.16968	0.0339483
AXIN1	1330	0.616541	0.366165	0.0172932	0.593902	0.0280488	0.0472279	0.577699	1.60784	0.0175976
AXIN2	1561	0.659833	0.331198	0.00896861	0.501942	0.0135922	0.0270793	0.495211	1.93974	0.00904977
AXL	1058	0.664461	0.323251	0.0122873	0.486486	0.0184922	0.0380117	0.477654	1.98028	0.0124402
AZGP1	406	0.70197	0.275862	0.0221675	0.392982	0.0315789	0.0803571	0.380952	2.35537	0.02267
B2M	152	0.697368	0.302632	0	0.433962	0	0	0.433962	2.30435	0
B3GALT1	289	0.626298	0.356401	0.017301	0.569061	0.0276243	0.0485437	0.553763	1.67593	0.0176056
B3GAT1	446	0.576233	0.408072	0.0156951	0.708171	0.0272374	0.0384615	0.689394	1.35979	0.0159453
B3GAT2	1091	0.693859	0.286893	0.0192484	0.413474	0.0277411	0.0670927	0.402314	2.26647	0.0196262
B3GNT3	451	0.643016	0.343681	0.0133038	0.534483	0.0206897	0.0387097	0.523649	1.80124	0.0134831
B3GNT7	518	0.640927	0.34556	0.0135135	0.539157	0.0210843	0.0391061	0.528024	1.78495	0.0136986
B3GNT9	669	0.61136	0.364723	0.0239163	0.596577	0.0391198	0.0655738	0.574118	1.57308	0.0245023
B3GNTL1	781	0.605634	0.355954	0.0384123	0.587738	0.0634249	0.107914	0.552684	1.53571	0.0399467
B4GALNT1	1374	0.666667	0.308588	0.0247453	0.462882	0.0371179	0.0801887	0.446316	2	0.0253731
B4GALNT2	708	0.679379	0.29661	0.0240113	0.43659	0.035343	0.0809524	0.421687	2.11894	0.024602
B4GALNT3	1243	0.662108	0.314562	0.0233307	0.475091	0.0352369	0.0741688	0.45892	1.95952	0.023888
B4GALNT4	1511	0.599603	0.382528	0.017869	0.637969	0.0298013	0.0467128	0.619507	1.49752	0.0181941
B4GALT5	350	0.605714	0.388571	0.00571429	0.641509	0.00943396	0.0147059	0.635514	1.53623	0.00574713
BAAT	480	0.702083	0.266667	0.03125	0.379822	0.0445104	0.117188	0.363636	2.35664	0.0322581
BACE1	579	0.671848	0.319516	0.00863558	0.475578	0.0128535	0.027027	0.469543	2.04737	0.0087108
BACE2	540	0.635185	0.355556	0.00925926	0.559767	0.0145773	0.0260417	0.551724	1.74112	0.00934579
BACH1	717	0.700139	0.287308	0.0125523	0.410359	0.0179283	0.0436893	0.403131	2.33488	0.0127119
BACH2	891	0.616162	0.37486	0.00897868	0.608379	0.0145719	0.0239521	0.599641	1.60526	0.00906002
BAG3	862	0.692575	0.278422	0.0290023	0.40201	0.041876	0.104167	0.385852	2.25283	0.0298686
BAG6	2169	0.661134	0.326418	0.0124481	0.493724	0.0188285	0.0381356	0.4846	1.95102	0.012605
BAHCC1	4107	0.653762	0.342342	0.00389579	0.52365	0.00595903	0.0113798	0.520548	1.88819	0.00391102
BAHD1	972	0.671811	0.319959	0.00823045	0.476263	0.0122511	0.0257235	0.470499	2.04702	0.00829876
BAIAP2	990	0.569697	0.416162	0.0141414	0.730496	0.0248227	0.0339806	0.712803	1.32394	0.0143443
BAIAP2L1	1346	0.682764	0.30312	0.0141159	0.443961	0.0206746	0.0465686	0.434968	2.15222	0.014318
BAIAP3	2088	0.659004	0.314655	0.026341	0.477471	0.0399709	0.0837139	0.459119	1.93258	0.0270536
BANK1	879	0.711035	0.254835	0.0341297	0.3584	0.048	0.133929	0.341985	2.46063	0.0353357
BANP	726	0.563361	0.42562	0.0110193	0.755501	0.0195599	0.02589	0.741007	1.29022	0.0111421
BAP1	1126	0.616341	0.357016	0.026643	0.579251	0.0432277	0.0746269	0.555249	1.60648	0.0273723
BARD1	1897	0.691618	0.268318	0.0400633	0.387957	0.0579268	0.149312	0.366715	2.24274	0.0417353
BARHL1	415	0.624096	0.368675	0.00722892	0.590734	0.011583	0.0196078	0.583969	1.66026	0.00728155
BARHL2	510	0.658824	0.331373	0.00980392	0.502976	0.014881	0.0295858	0.495601	1.93103	0.00990099
BASP1	369	0.674797	0.322493	0.00271003	0.477912	0.00401606	0.00840336	0.476	2.075	0.00271739
BAZ1A	1311	0.670481	0.309687	0.0198322	0.461889	0.0295791	0.0640394	0.448619	2.03472	0.0202335
BAZ1B	1259	0.631454	0.359015	0.00953137	0.568553	0.0150943	0.0265487	0.560099	1.71336	0.0096231
BAZ2A	1982	0.692735	0.298184	0.00908174	0.430444	0.01311	0.0304569	0.424874	2.25452	0.00916497
BAZ2B	2203	0.703132	0.28325	0.0136178	0.402841	0.0193673	0.0480769	0.395187	2.3685	0.0138058
BBS1	1339	0.687827	0.29649	0.0156833	0.431053	0.0228013	0.0528967	0.421444	2.20335	0.0159332
BBS10	821	0.712546	0.239951	0.047503	0.336752	0.0666667	0.19797	0.315705	2.47881	0.0498721
BBS12	763	0.685452	0.283093	0.0314548	0.413002	0.0458891	0.111111	0.394881	2.17917	0.0324763
BBS2	1216	0.663651	0.294408	0.0419408	0.443618	0.063197	0.142458	0.417249	1.97311	0.0437768
BBS7	678	0.718289	0.262537	0.019174	0.365503	0.026694	0.0730337	0.356	2.54974	0.0195489
BBS9	1028	0.678988	0.285019	0.0359922	0.419771	0.0530086	0.12628	0.398639	2.11515	0.037336
BBX	1098	0.65847	0.322404	0.0191257	0.489627	0.0290456	0.059322	0.475806	1.928	0.0194986
BCAM	949	0.653319	0.324552	0.0221286	0.496774	0.033871	0.0681818	0.480499	1.8845	0.0226293
BCAN	1218	0.669951	0.304598	0.0254516	0.454657	0.0379902	0.083558	0.438017	2.02985	0.0261163
BCAR1	1584	0.645202	0.347222	0.00757576	0.53816	0.0117417	0.0218182	0.531915	1.81851	0.00763359
BCAR3	1182	0.699662	0.290186	0.0101523	0.414752	0.0145103	0.0349854	0.40882	2.32958	0.0102564
BCAS1	743	0.716016	0.275908	0.00807537	0.385338	0.0112782	0.0292683	0.381041	2.52133	0.00814111
BCAS3	1114	0.671454	0.31149	0.0170557	0.463904	0.0254011	0.054755	0.452412	2.04372	0.0173516
BCAT1	527	0.70778	0.256167	0.0360531	0.36193	0.0509383	0.140741	0.344388	2.42208	0.0374016
BCAT2	499	0.633267	0.328657	0.0380762	0.518987	0.0601266	0.115854	0.489552	1.72678	0.0395833
BCHE	764	0.751309	0.197644	0.0510471	0.263066	0.0679443	0.258278	0.24633	3.02105	0.0537931
BCKDHA	846	0.654846	0.314421	0.0307329	0.480144	0.0469314	0.0977444	0.458621	1.89726	0.0317073
BCKDK	572	0.645105	0.332168	0.0227273	0.514905	0.0352304	0.0684211	0.497382	1.81773	0.0232558
BCL11A	972	0.582305	0.399177	0.0185185	0.685512	0.0318021	0.0463918	0.664384	1.39409	0.0188679
BCL11B	1140	0.516667	0.476316	0.00701754	0.921902	0.0135823	0.014733	0.909548	1.06897	0.00706714
BCL2	326	0.576687	0.41411	0.00920245	0.718085	0.0159574	0.0222222	0.706806	1.36232	0.00928793
BCL2L12	681	0.657856	0.320117	0.0220264	0.486607	0.0334821	0.0688073	0.470842	1.92275	0.0225225
BCL6	730	0.654795	0.336986	0.00821918	0.514644	0.0125523	0.0243902	0.508264	1.89683	0.00828729
BCL6B	624	0.644231	0.347756	0.00801282	0.539801	0.0124378	0.0230415	0.53317	1.81081	0.00807754
BCL9	1748	0.702517	0.293478	0.00400458	0.417752	0.00570033	0.0136452	0.415385	2.36154	0.00402068
BCL9L	2136	0.654963	0.338483	0.00655431	0.516798	0.0100071	0.0193638	0.511677	1.89824	0.00659755
BCLAF1	1988	0.694165	0.274648	0.0311871	0.395652	0.0449275	0.113553	0.378641	2.26974	0.0321911
BCO2	636	0.712264	0.245283	0.0424528	0.344371	0.0596026	0.173077	0.325	2.47541	0.044335
BCOR	1706	0.65592	0.33177	0.0123095	0.505809	0.0187668	0.0371025	0.496491	1.9063	0.0124629
BCORL1	1386	0.657287	0.335498	0.00721501	0.510428	0.0109769	0.0215054	0.504886	1.91789	0.00726744
BCR	2444	0.643208	0.349018	0.00777414	0.542621	0.0120865	0.0222743	0.536141	1.80275	0.00783505
BDKRB1	444	0.655405	0.317568	0.027027	0.484536	0.0412371	0.0851064	0.465347	1.90196	0.0277778
BDKRB2	510	0.641176	0.345098	0.0137255	0.538226	0.0214067	0.0397727	0.526946	1.78689	0.0139165
BDP1	2893	0.695126	0.280677	0.0241963	0.403779	0.0348086	0.0862069	0.390197	2.28005	0.0247963
BEGAIN	883	0.597961	0.394111	0.00792752	0.659091	0.0132576	0.0201149	0.650467	1.48732	0.00799087
BEND2	603	0.694859	0.293532	0.0116086	0.422434	0.0167064	0.039548	0.415493	2.27717	0.011745
BEND3	1019	0.614328	0.377821	0.00785083	0.615016	0.0127796	0.0207792	0.607256	1.59288	0.00791296
BEND4	604	0.662252	0.326159	0.0115894	0.4925	0.0175	0.035533	0.484029	1.96078	0.0117253
BEND5	853	0.621336	0.368113	0.010551	0.592453	0.0169811	0.0286624	0.58256	1.64087	0.0106635
BEST2	699	0.610873	0.359084	0.0300429	0.587822	0.0491803	0.0836653	0.560268	1.56985	0.0309735
BEST3	783	0.664112	0.292465	0.0434227	0.440385	0.0653846	0.148472	0.413357	1.97719	0.0453939
BFSP1	830	0.673494	0.296386	0.0301205	0.440072	0.0447227	0.101626	0.421233	2.06273	0.0310559
BFSP2	507	0.676529	0.291913	0.0315582	0.431487	0.0466472	0.108108	0.412256	2.09146	0.0325866
BGN	340	0.632353	0.358824	0.00882353	0.567442	0.0139535	0.0245902	0.559633	1.72	0.00890208
BHLHB9	337	0.74184	0.246291	0.0118694	0.332	0.016	0.0481928	0.326772	2.87356	0.012012
BHMT	523	0.617591	0.33652	0.0458891	0.544892	0.0743034	0.136364	0.507205	1.615	0.0480962
BICC1	1165	0.68412	0.303004	0.0128755	0.442911	0.0188206	0.0424929	0.434729	2.16576	0.0130435
BICD1	1043	0.650048	0.332694	0.0172579	0.511799	0.0265487	0.0518732	0.498563	1.85753	0.017561
BICD2	1068	0.622659	0.367978	0.0093633	0.590977	0.0150376	0.0254453	0.582222	1.65012	0.0094518
BIN1	743	0.604307	0.378197	0.0174966	0.625835	0.0289532	0.0462633	0.608225	1.52721	0.0178082
BIN2	605	0.671074	0.300826	0.0280992	0.448276	0.0418719	0.0934066	0.43026	2.0402	0.0289116
BIRC2	649	0.699538	0.288136	0.0123267	0.411894	0.0176211	0.0427807	0.404762	2.32821	0.0124805
BIRC3	642	0.693146	0.292835	0.0140187	0.422472	0.0202247	0.0478723	0.414097	2.25888	0.014218
BIRC6	4868	0.668652	0.32539	0.00595727	0.486636	0.00890937	0.0183081	0.482339	2.01798	0.00599297
BIVM	622	0.688103	0.286174	0.0257235	0.415888	0.0373832	0.0898876	0.400901	2.20619	0.0264026
BLK	1070	0.66729	0.302804	0.0299065	0.453782	0.0448179	0.0987654	0.434316	2.00562	0.0308285
BLM	1779	0.692524	0.274874	0.0326026	0.396916	0.0470779	0.118609	0.37907	2.25229	0.0337013
BLNK	612	0.660131	0.328431	0.0114379	0.497525	0.0173267	0.0348259	0.489051	1.94231	0.0115702
BMP1	1522	0.661629	0.32523	0.0131406	0.491559	0.019861	0.040404	0.481986	1.95534	0.0133156
BMP10	439	0.646925	0.341686	0.0113895	0.528169	0.0176056	0.0333333	0.519031	1.83226	0.0115207
BMP15	341	0.71261	0.255132	0.0322581	0.358025	0.0452675	0.126437	0.34252	2.47959	0.0333333
BMP2	458	0.622271	0.362445	0.0152838	0.582456	0.0245614	0.0421687	0.568493	1.6474	0.0155211
BMP2K	1760	0.721023	0.266477	0.0125	0.369582	0.0173365	0.0469083	0.363284	2.58452	0.0126582
BMP3	593	0.6914	0.291737	0.0168634	0.421951	0.0243902	0.0578035	0.411905	2.24044	0.0171527
BMP4	524	0.675573	0.30916	0.0152672	0.457627	0.0225989	0.0493827	0.447514	2.08235	0.0155039
BMP5	522	0.683908	0.289272	0.0268199	0.422969	0.0392157	0.0927152	0.407008	2.16364	0.0275591
BMP6	747	0.659973	0.334672	0.00535475	0.507099	0.00811359	0.016	0.503018	1.94094	0.00538358
BMP7	632	0.620253	0.365506	0.0142405	0.589286	0.0229592	0.038961	0.57606	1.63333	0.0144462
BMPER	841	0.687277	0.29132	0.0214031	0.423875	0.0311419	0.0734694	0.411074	2.19772	0.0218712
BMPR1A	835	0.664671	0.286228	0.0491018	0.430631	0.0738739	0.171548	0.401007	1.98214	0.0516373
BMPR1B	588	0.722789	0.268707	0.0085034	0.371765	0.0117647	0.0316456	0.367442	2.60736	0.00857633
BMPR2	1106	0.674503	0.24141	0.0840868	0.357909	0.124665	0.348315	0.318236	2.07222	0.0918065
BMS1	1489	0.691068	0.288113	0.0208193	0.41691	0.0301263	0.0722611	0.404717	2.23696	0.021262
BMX	898	0.683742	0.305122	0.0111359	0.446254	0.0162866	0.0364964	0.439103	2.16197	0.0112613
BNC1	1073	0.694315	0.299161	0.00652377	0.430872	0.00939597	0.0218069	0.426862	2.27134	0.0065666
BNC2	1332	0.674925	0.317568	0.00750751	0.470523	0.0111235	0.0236407	0.465347	2.07621	0.0075643
BOC	1399	0.651894	0.330951	0.0171551	0.507675	0.0263158	0.0518359	0.494658	1.87269	0.0174545
BPI	728	0.703297	0.277473	0.0192308	0.394531	0.0273438	0.0693069	0.38403	2.37037	0.0196078
BPIFB4	877	0.661345	0.310148	0.0285063	0.468966	0.0431034	0.0919118	0.449587	1.95286	0.0293427
BPTF	2728	0.66239	0.332845	0.0047654	0.50249	0.00719424	0.0143172	0.498901	1.962	0.00478821
BRAF	875	0.653714	0.331429	0.0148571	0.506993	0.0227273	0.0448276	0.495726	1.88779	0.0150812
BRAP	716	0.653631	0.326816	0.0195531	0.5	0.0299145	0.0598291	0.485477	1.8871	0.019943
BRAT1	1540	0.633117	0.341558	0.0253247	0.539487	0.04	0.0741445	0.518738	1.72566	0.0259827
BRCA1	4786	0.674049	0.229001	0.0969494	0.33974	0.143831	0.423358	0.297019	2.06795	0.107358
BRCA2	8491	0.683901	0.233306	0.0827935	0.34114	0.121061	0.354871	0.304301	2.16356	0.0902671
BRD1	1475	0.599322	0.391186	0.00949153	0.652715	0.0158371	0.0242634	0.642539	1.49577	0.00958248
BRD2	1116	0.63172	0.362007	0.0062724	0.57305	0.00992908	0.0173267	0.567416	1.71533	0.00631199
BRD3	854	0.567916	0.425059	0.00702576	0.748454	0.0123711	0.0165289	0.739308	1.31436	0.00707547
BRD4	1818	0.59626	0.40044	0.00330033	0.671587	0.00553506	0.00824176	0.66789	1.47684	0.00331126
BRD7	693	0.69697	0.291486	0.011544	0.418219	0.0165631	0.039604	0.411405	2.3	0.0116788
BRD8	1200	0.655833	0.324167	0.02	0.494282	0.0304956	0.0616967	0.479655	1.90557	0.0204082
BRD9	1310	0.631298	0.353435	0.0152672	0.559855	0.0241838	0.0431965	0.546635	1.71222	0.0155039
BRDT	968	0.709711	0.268595	0.0216942	0.378457	0.0305677	0.0807692	0.367232	2.44484	0.0221753
BRF1	2044	0.623777	0.358611	0.0176125	0.574902	0.0282353	0.0491132	0.559115	1.658	0.0179283
BRIP1	2344	0.694966	0.265358	0.0396758	0.381829	0.0570902	0.149518	0.361208	2.27832	0.041315
BRPF1	1209	0.607113	0.383788	0.00909843	0.632153	0.0149864	0.0237069	0.622819	1.54526	0.00918197
BRPF3	1213	0.647156	0.343776	0.00906843	0.53121	0.0140127	0.0263789	0.523869	1.83411	0.00915141
BRS3	247	0.659919	0.331984	0.00809717	0.503067	0.0122699	0.0243902	0.49697	1.94048	0.00816327
BRSK1	1216	0.569079	0.421053	0.00986842	0.739884	0.017341	0.0234375	0.727273	1.32061	0.00996678
BRSK2	1278	0.589202	0.403756	0.00704225	0.685259	0.0119522	0.0174419	0.677165	1.43429	0.0070922
BRWD1	2207	0.682374	0.301314	0.0163117	0.441567	0.0239044	0.0541353	0.431258	2.14836	0.0165822
BRWD3	1023	0.621701	0.365591	0.0127077	0.58805	0.0204403	0.0347594	0.576271	1.64341	0.0128713
BSG	698	0.588825	0.389685	0.02149	0.6618	0.0364964	0.0551471	0.638498	1.43206	0.0219619
BSN	4677	0.681634	0.312166	0.00620056	0.457967	0.00909661	0.019863	0.453839	2.14103	0.00623924
BSND	409	0.662592	0.308068	0.0293399	0.464945	0.0442804	0.0952381	0.44523	1.96377	0.0302267
BTAF1	1446	0.641079	0.352006	0.00691563	0.549083	0.0107875	0.0196464	0.543223	1.78613	0.00696379
BTBD11	1368	0.649854	0.340643	0.00950292	0.524184	0.0146232	0.027897	0.51663	1.85595	0.0095941
BTBD16	671	0.661699	0.315946	0.0223547	0.477477	0.0337838	0.0707547	0.461874	1.95595	0.0228659
BTBD17	653	0.603369	0.367534	0.0290965	0.609137	0.0482234	0.0791667	0.581114	1.52124	0.0299685
BTBD2	766	0.574413	0.421671	0.00391645	0.734091	0.00681818	0.00928793	0.72912	1.34969	0.00393185
BTBD3	511	0.630137	0.35225	0.0176125	0.559006	0.0279503	0.05	0.543807	1.7037	0.0179283
BTBD7	1295	0.682625	0.303475	0.0138996	0.44457	0.020362	0.0458015	0.435698	2.15085	0.0140955
BTBD9	612	0.640523	0.318627	0.0408497	0.497449	0.0637755	0.128205	0.467626	1.78182	0.0425894
BTK	510	0.564706	0.362745	0.072549	0.642361	0.128472	0.2	0.569231	1.2973	0.0782241
BTN1A1	549	0.684882	0.291439	0.0236794	0.425532	0.0345745	0.08125	0.411311	2.17341	0.0242537
BTN2A1	748	0.65508	0.300802	0.0441176	0.459184	0.0673469	0.146667	0.43021	1.89922	0.0461538
BTN2A2	672	0.677083	0.291667	0.03125	0.430769	0.0461538	0.107143	0.411765	2.09677	0.0322581
BTN3A1	594	0.708754	0.257576	0.03367	0.36342	0.0475059	0.130719	0.346939	2.43353	0.0348432
BTN3A3	732	0.668033	0.295082	0.0368852	0.441718	0.0552147	0.125	0.418605	2.01235	0.0382979
BTNL3	514	0.675097	0.291829	0.0330739	0.432277	0.0489914	0.113333	0.412088	2.07784	0.0342052
BTNL8	678	0.687316	0.278761	0.0339233	0.405579	0.0493562	0.121693	0.386503	2.19811	0.0351145
BTNL9	920	0.657609	0.313043	0.0293478	0.476033	0.0446281	0.09375	0.455696	1.92063	0.0302352
BTRC	682	0.640762	0.331378	0.0278592	0.517162	0.0434783	0.0840708	0.495614	1.78367	0.0286576
BUB1	1033	0.703775	0.272023	0.0242014	0.38652	0.0343879	0.088968	0.37367	2.37582	0.0248016
BUB1B	1096	0.688869	0.284672	0.0264599	0.413245	0.0384106	0.0929487	0.397959	2.21408	0.027179
BUD13	773	0.723157	0.254851	0.0219922	0.352415	0.0304114	0.0862944	0.342014	2.61215	0.0224868
BVES	385	0.703896	0.27013	0.025974	0.383764	0.0369004	0.0961538	0.370107	2.37719	0.0266667
C10orf120	413	0.716707	0.239709	0.0435835	0.334459	0.0608108	0.181818	0.315287	2.52991	0.0455696
C10orf71	1741	0.689833	0.286043	0.0241241	0.414654	0.0349709	0.0843373	0.400644	2.22407	0.0247204
C10orf90	1072	0.699627	0.275187	0.0251866	0.393333	0.036	0.0915254	0.379665	2.32919	0.0258373
C11orf80	1348	0.655786	0.327893	0.0163205	0.5	0.0248869	0.0497738	0.487859	1.90517	0.0165913
C12orf4	492	0.697154	0.264228	0.0386179	0.379009	0.0553936	0.146154	0.359116	2.30201	0.0401691
C12orf40	905	0.716022	0.246409	0.0375691	0.344136	0.0524691	0.152466	0.326979	2.5214	0.0390356
C12orf42	713	0.69986	0.27209	0.0280505	0.388778	0.0400802	0.103093	0.373796	2.33178	0.02886
C12orf50	540	0.705556	0.259259	0.0351852	0.367454	0.0498688	0.135714	0.35	2.39623	0.0364683
C12orf56	733	0.6603	0.294679	0.0450205	0.446281	0.0681818	0.152778	0.417795	1.94378	0.0471429
C14orf39	664	0.715361	0.260542	0.0240964	0.364211	0.0336842	0.0924855	0.352342	2.51323	0.0246914
C15orf39	1284	0.676791	0.314642	0.00856698	0.464902	0.0126582	0.0272277	0.459091	2.09398	0.00864101
C16orf46	583	0.704974	0.267581	0.0274443	0.379562	0.0389294	0.102564	0.36534	2.38953	0.0282187
C16orf71	1120	0.699107	0.277679	0.0232143	0.39719	0.0332056	0.0836013	0.384425	2.32344	0.023766
C16orf78	349	0.722063	0.240688	0.0372493	0.333333	0.0515873	0.154762	0.316981	2.59794	0.0386905
C16orf89	771	0.652399	0.302205	0.0453956	0.463221	0.0695825	0.150215	0.433086	1.87687	0.0475543
C16orf96	1427	0.703574	0.267694	0.0287316	0.380478	0.0408367	0.10733	0.36555	2.37352	0.0295815
C17orf80	1062	0.630885	0.347458	0.0216573	0.550746	0.0343284	0.0623306	0.532468	1.70918	0.0221367
C17orf97	762	0.645669	0.333333	0.0209974	0.51626	0.0325203	0.0629921	0.5	1.82222	0.0214477
C19orf44	816	0.677696	0.291667	0.0306373	0.43038	0.045208	0.105042	0.411765	2.10266	0.0316056
C19orf57	1142	0.676883	0.301226	0.0218914	0.445019	0.0323415	0.0726744	0.431078	2.09485	0.0223814
C1orf112	1388	0.70245	0.271614	0.0259366	0.386667	0.0369231	0.0954907	0.372898	2.36077	0.0266272
C1orf116	787	0.730623	0.25413	0.0152478	0.347826	0.0208696	0.06	0.340716	2.71226	0.0154839
C1orf127	1046	0.681644	0.283939	0.0344168	0.41655	0.0504909	0.121212	0.396529	2.14114	0.0356436
C1orf141	509	0.693517	0.277014	0.0294695	0.399433	0.0424929	0.106383	0.383152	2.26282	0.0303644
C1orf167	1488	0.656586	0.295027	0.0483871	0.449335	0.073695	0.164009	0.418494	1.91194	0.0508475
C1orf87	644	0.670807	0.287267	0.0419255	0.428241	0.0625	0.145946	0.40305	2.03774	0.0437601
C1orf94	752	0.680851	0.299202	0.0199468	0.439453	0.0292969	0.0666667	0.426945	2.13333	0.0203528
C1QTNF2	509	0.689587	0.294695	0.0157171	0.42735	0.022792	0.0533333	0.417827	2.22152	0.0159681
C1R	770	0.637662	0.335065	0.0272727	0.525458	0.0427699	0.0813953	0.503906	1.75986	0.0280374
C1RL	696	0.646552	0.316092	0.0373563	0.488889	0.0577778	0.118182	0.462185	1.82927	0.038806
C1S	709	0.671368	0.304654	0.0239774	0.453782	0.0357143	0.0787037	0.438134	2.04292	0.0245665
C2	1450	0.647586	0.331034	0.0213793	0.511182	0.0330138	0.0645833	0.494845	1.83757	0.0218464
C20orf194	1179	0.671756	0.303647	0.0245971	0.45202	0.0366162	0.0810056	0.436054	2.04651	0.0252174
C2CD2	889	0.614173	0.364454	0.0213723	0.593407	0.0347985	0.058642	0.573451	1.59184	0.0218391
C2CD2L	777	0.685972	0.307593	0.00643501	0.448405	0.00938086	0.0209205	0.444238	2.18443	0.00647668
C2CD3	2671	0.691127	0.287907	0.0209659	0.416576	0.0303359	0.0728218	0.404311	2.23758	0.0214149
C2orf16	1492	0.700402	0.266756	0.0328418	0.380861	0.04689	0.123116	0.363803	2.33781	0.033957
C2orf42	588	0.664966	0.307823	0.0272109	0.462916	0.0409207	0.0883978	0.444717	1.98477	0.027972
C2orf78	983	0.713123	0.25941	0.0274669	0.363766	0.0385164	0.105882	0.350275	2.48582	0.0282427
C3	1898	0.584299	0.403056	0.0126449	0.689811	0.0216411	0.0313725	0.675199	1.40558	0.0128068
C3AR1	562	0.701068	0.266904	0.0320285	0.380711	0.0456853	0.12	0.364078	2.34524	0.0330882
C3orf20	1187	0.695872	0.276327	0.0278012	0.397094	0.0399516	0.10061	0.381839	2.28809	0.0285962
C4BPA	586	0.646758	0.331058	0.0221843	0.511873	0.0343008	0.0670103	0.494898	1.83092	0.0226876
C4orf50	1746	0.679267	0.285223	0.0355097	0.419899	0.0522766	0.124498	0.399038	2.11786	0.0368171
C5	1686	0.687426	0.281732	0.0308422	0.409836	0.0448663	0.109474	0.392238	2.19924	0.0318237
C5AR1	501	0.640719	0.335329	0.0239521	0.523364	0.0373832	0.0714286	0.504505	1.78333	0.0245399
C5orf34	704	0.711648	0.247159	0.0411932	0.347305	0.0578842	0.166667	0.328302	2.46798	0.042963
C6	1245	0.677108	0.28755	0.0353414	0.424674	0.0521945	0.122905	0.403608	2.09701	0.0366361
C6orf118	722	0.66482	0.296399	0.0387812	0.445833	0.0583333	0.130841	0.42126	1.98347	0.0403458
C7	1077	0.696379	0.273909	0.0297122	0.393333	0.0426667	0.108475	0.377238	2.29358	0.030622
C7orf31	703	0.738265	0.230441	0.0312945	0.312139	0.0423892	0.135802	0.299445	2.82065	0.0323054
C8A	823	0.699878	0.262454	0.0376671	0.375	0.0538194	0.143519	0.355848	2.33198	0.0391414
C8B	810	0.676543	0.279012	0.0444444	0.412409	0.0656934	0.159292	0.386986	2.0916	0.0465116
C8orf34	597	0.696817	0.276382	0.0268007	0.396635	0.0384615	0.0969697	0.381944	2.29834	0.0275387
C9	727	0.70564	0.255846	0.0385144	0.362573	0.0545809	0.150538	0.343808	2.3972	0.0400572
C9orf131	1297	0.708558	0.262914	0.0285274	0.371055	0.0402612	0.108504	0.356695	2.43122	0.0293651
C9orf43	941	0.680128	0.292242	0.0276302	0.429688	0.040625	0.0945455	0.412913	2.12625	0.0284153
C9orf50	423	0.41844	0.527187	0.0543735	1.25989	0.129944	0.103139	1.115	0.719512	0.0575
CA10	324	0.645062	0.33642	0.0185185	0.521531	0.0287081	0.0550459	0.506977	1.81739	0.0188679
CA4	459	0.651416	0.320261	0.0283224	0.491639	0.0434783	0.0884354	0.471154	1.86875	0.029148
CA8	323	0.628483	0.346749	0.0247678	0.551724	0.0394089	0.0714286	0.530806	1.69167	0.0253968
CA9	569	0.685413	0.293497	0.0210896	0.428205	0.0307692	0.0718563	0.415423	2.17877	0.021544
CABIN1	2543	0.660244	0.321667	0.0180889	0.487195	0.0273973	0.0562347	0.474203	1.94329	0.0184221
CABP4	562	0.640569	0.322064	0.0373665	0.502778	0.0583333	0.116022	0.475066	1.78218	0.038817
CABS1	484	0.725207	0.262397	0.0123967	0.361823	0.017094	0.0472441	0.355742	2.6391	0.0125523
CACHD1	1351	0.69356	0.290155	0.0162842	0.418356	0.0234792	0.0561224	0.408759	2.26329	0.0165538
CACNA1A	3077	0.610985	0.369841	0.0191745	0.605319	0.031383	0.0518453	0.5869	1.57059	0.0195494
CACNA1B	3067	0.552005	0.33942	0.108575	0.614885	0.196692	0.319885	0.51382	1.23217	0.1218
CACNA1C	2875	0.507478	0.369739	0.122783	0.728581	0.241947	0.332079	0.586645	1.03037	0.139968
CACNA1D	2019	0.618623	0.370976	0.0104012	0.59968	0.0168135	0.0280374	0.589764	1.62208	0.0105105
CACNA1E	2226	0.607367	0.384996	0.00763702	0.633876	0.012574	0.0198366	0.626004	1.54691	0.00769579
CACNA1F	1602	0.661673	0.318976	0.0193508	0.482075	0.0292453	0.0606654	0.468378	1.95572	0.0197327
CACNA1G	2613	0.610409	0.382702	0.00688863	0.626959	0.0112853	0.018	0.619963	1.5668	0.00693642
CACNA1H	6040	0.596192	0.35894	0.0448675	0.602055	0.0752569	0.125	0.559917	1.47642	0.0469752
CACNA1I	2557	0.58858	0.400469	0.0109503	0.680399	0.0186047	0.0273438	0.667971	1.43061	0.0110716
CACNA1S	2578	0.645849	0.292863	0.0612878	0.453453	0.0948949	0.209272	0.414152	1.82366	0.0652893
CACNA2D1	1239	0.51251	0.273608	0.213882	0.533858	0.417323	0.781711	0.376667	1.05132	0.272074
CACNA2D2	1996	0.566633	0.341182	0.0921844	0.602122	0.162688	0.270191	0.517871	1.30751	0.101545
CACNA2D3	1360	0.535294	0.288971	0.175735	0.539835	0.328297	0.608142	0.406412	1.1519	0.213202
CACNA2D4	1767	0.593662	0.27957	0.126769	0.470925	0.213537	0.453441	0.38806	1.461	0.145172
CACNB1	755	0.654305	0.33245	0.013245	0.508097	0.0202429	0.0398406	0.498016	1.89272	0.0134228
CACNB2	1616	0.597153	0.316832	0.0860149	0.53057	0.144041	0.271484	0.463768	1.48233	0.0941097
CACNB3	497	0.635815	0.344064	0.0201207	0.541139	0.0316456	0.0584795	0.52454	1.74586	0.0205339
CACNB4	591	0.514382	0.28088	0.204738	0.546053	0.398026	0.728916	0.390588	1.05923	0.257447
CACNG2	327	0.623853	0.373089	0.0030581	0.598039	0.00490196	0.00819672	0.595122	1.65854	0.00306748
CACNG3	300	0.526667	0.473333	0	0.898734	0	0	0.898734	1.11268	0
CACNG4	365	0.589041	0.394521	0.0164384	0.669767	0.027907	0.0416667	0.651584	1.43333	0.0167131
CACNG5	359	0.665738	0.317549	0.0167131	0.476987	0.0251046	0.0526316	0.465306	1.99167	0.0169972
CACNG7	435	0.636782	0.356322	0.00689655	0.559567	0.0108303	0.0193548	0.553571	1.75316	0.00694444
CACNG8	453	0.516556	0.479029	0.00441501	0.92735	0.00854701	0.00921659	0.919492	1.06849	0.00443459
CAD	2588	0.647991	0.34119	0.0108192	0.526535	0.0166965	0.0317101	0.517889	1.84083	0.0109375
CADM1	527	0.607211	0.388994	0.00379507	0.640625	0.00625	0.0097561	0.636646	1.54589	0.00380952
CADM2	443	0.598194	0.392777	0.00902935	0.656604	0.0150943	0.0229885	0.64684	1.48876	0.00911162
CADM3	493	0.614604	0.371197	0.0141988	0.60396	0.0231023	0.0382514	0.590323	1.59474	0.0144033
CADPS	1466	0.610505	0.373124	0.0163711	0.611173	0.0268156	0.0438757	0.595212	1.56743	0.0166436
CADPS2	1345	0.675836	0.304833	0.0193309	0.451045	0.0286029	0.0634146	0.438503	2.08486	0.0197119
CAGE1	903	0.676633	0.292359	0.0310078	0.432079	0.0458265	0.106061	0.413146	2.09247	0.032
CALB2	342	0.652047	0.324561	0.0233918	0.497758	0.0358744	0.0720721	0.480519	1.87395	0.0239521
CALCOCO1	750	0.665333	0.312	0.0226667	0.468938	0.0340681	0.0726496	0.453488	1.98805	0.0231924
CALCR	606	0.693069	0.277228	0.029703	0.4	0.0428571	0.107143	0.383562	2.25806	0.0306122
CALCRL	387	0.671835	0.315245	0.0129199	0.469231	0.0192308	0.0409836	0.460377	2.04724	0.013089
CALD1	855	0.730994	0.259649	0.00935673	0.3552	0.0128	0.036036	0.350711	2.71739	0.0094451
CALN1	345	0.617391	0.356522	0.026087	0.577465	0.0422535	0.0731707	0.554054	1.61364	0.0267857
CALR	560	0.6	0.392857	0.00714286	0.654762	0.0119048	0.0181818	0.647059	1.5	0.00719424
CALR3	556	0.67446	0.289568	0.0359712	0.429333	0.0533333	0.124224	0.407595	2.07182	0.0373134
CAMK1D	394	0.548223	0.431472	0.0203046	0.787037	0.037037	0.0470588	0.758929	1.21348	0.0207254
CAMK1G	515	0.6	0.378641	0.0213592	0.631068	0.0355987	0.0564103	0.609375	1.5	0.0218254
CAMK2A	335	0.453731	0.528358	0.0179104	1.16447	0.0394737	0.0338983	1.12025	0.830601	0.0182371
CAMK2B	727	0.535076	0.448418	0.0165062	0.838046	0.0308483	0.0368098	0.812968	1.15089	0.0167832
CAMK2G	631	0.59271	0.391442	0.0158479	0.660428	0.026738	0.0404858	0.643229	1.45525	0.0161031
CAMK4	470	0.634043	0.342553	0.0234043	0.540268	0.0369128	0.068323	0.521036	1.73256	0.0239651
CAMKK1	703	0.654339	0.337127	0.00853485	0.515217	0.0130435	0.0253165	0.508584	1.893	0.00860832
CAMKK2	775	0.634839	0.348387	0.0167742	0.54878	0.0264228	0.0481481	0.534653	1.73852	0.0170604
CAMKV	435	0.551724	0.445977	0.00229885	0.808333	0.00416667	0.00515464	0.804979	1.23077	0.00230415
CAMSAP1	1898	0.641201	0.348788	0.0100105	0.543961	0.0156122	0.0287009	0.535599	1.78708	0.0101118
CAMSAP2	1198	0.708681	0.283806	0.00751252	0.400471	0.0106007	0.0264706	0.39627	2.43266	0.00756939
CAMSAP3	1601	0.61649	0.377264	0.0062461	0.611955	0.0101317	0.0165563	0.605817	1.60749	0.00628536
CAMTA1	1902	0.650368	0.337014	0.0126183	0.518189	0.0194018	0.0374415	0.508327	1.86015	0.0127796
CAMTA2	2227	0.664122	0.322856	0.013022	0.486139	0.0196078	0.0403338	0.47679	1.97727	0.0131938
CAND1	910	0.6	0.393407	0.00659341	0.655678	0.010989	0.0167598	0.648551	1.5	0.00663717
CAND2	1700	0.644706	0.337647	0.0176471	0.523723	0.0273723	0.0522648	0.509769	1.81457	0.0179641
CANT1	570	0.652632	0.321053	0.0263158	0.491935	0.0403226	0.0819672	0.472868	1.87879	0.027027
CANX	1033	0.658277	0.31849	0.0232333	0.483824	0.0352941	0.0729483	0.46733	1.92635	0.0237859
CAP2	491	0.684318	0.299389	0.0162933	0.4375	0.0238095	0.0544218	0.427326	2.16774	0.0165631
CAPN1	865	0.672832	0.307514	0.0196532	0.457045	0.0292096	0.0639098	0.444073	2.05654	0.0200472
CAPN10	962	0.619543	0.35447	0.0259875	0.572148	0.0419463	0.0733138	0.549114	1.62842	0.0266809
CAPN11	915	0.68306	0.279781	0.0371585	0.4096	0.0544	0.132812	0.388467	2.15517	0.0385925
CAPN12	1271	0.644375	0.314713	0.0409127	0.4884	0.0634921	0.13	0.459242	1.81195	0.0426579
CAPN13	884	0.687783	0.281674	0.030543	0.409539	0.0444079	0.108434	0.392126	2.2029	0.0315053
CAPN14	785	0.68535	0.286624	0.0280255	0.418216	0.0408922	0.0977778	0.401786	2.17814	0.0288336
CAPN2	921	0.653637	0.304017	0.0423453	0.465116	0.0647841	0.139286	0.436817	1.88715	0.0442177
CAPN3	1105	0.677828	0.284163	0.038009	0.419226	0.0560748	0.133758	0.396966	2.10393	0.0395108
CAPN5	1109	0.665464	0.305681	0.0288548	0.45935	0.0433604	0.0943953	0.44026	1.98922	0.0297122
CAPN6	447	0.637584	0.346756	0.01566	0.54386	0.0245614	0.0451613	0.530822	1.75926	0.0159091
CAPN7	850	0.669412	0.296471	0.0341176	0.442882	0.0509666	0.115079	0.421405	2.02491	0.0353228
CAPN9	884	0.692308	0.273756	0.0339367	0.395425	0.0490196	0.123967	0.376947	2.25	0.0351288
CAPRIN1	698	0.673352	0.310888	0.0157593	0.461702	0.0234043	0.0506912	0.451143	2.0614	0.0160116
CAPRIN2	1191	0.676742	0.298069	0.0251889	0.440447	0.0372208	0.084507	0.424641	2.09351	0.0258398
CAPS2	1363	0.696992	0.265591	0.0374175	0.381053	0.0536842	0.140884	0.361638	2.30024	0.038872
CAPSL	309	0.705502	0.268608	0.02589	0.380734	0.0366972	0.0963855	0.367257	2.3956	0.0265781
CARD10	1303	0.633922	0.350729	0.0153492	0.553269	0.0242131	0.0437637	0.540189	1.73166	0.0155885
CARD11	1335	0.572285	0.420974	0.00674157	0.735602	0.0117801	0.0160142	0.727038	1.338	0.00678733
CARD14	2166	0.644044	0.336565	0.0193906	0.522581	0.0301075	0.0576132	0.507307	1.80934	0.019774
CARD6	1118	0.729875	0.229875	0.0402504	0.314951	0.0551471	0.175097	0.29849	2.70199	0.0419385
CARD8	697	0.654232	0.321377	0.0243902	0.491228	0.0372807	0.0758929	0.473573	1.89212	0.025
CARD9	1349	0.644181	0.337287	0.0185322	0.52359	0.0287687	0.0549451	0.508949	1.81042	0.0188822
CARM1	772	0.566062	0.428756	0.00518135	0.757437	0.00915332	0.0120846	0.750567	1.30448	0.00520833
CARNS1	1267	0.656669	0.322021	0.0213102	0.490385	0.0324519	0.0661765	0.474971	1.91264	0.0217742
CARS2	929	0.653391	0.317546	0.0290635	0.485997	0.0444811	0.0915254	0.4653	1.88509	0.0299335
CASC1	748	0.661765	0.300802	0.0374332	0.454545	0.0565657	0.124444	0.43021	1.95652	0.0388889
CASC3	759	0.69697	0.29249	0.0105402	0.41966	0.0151229	0.036036	0.413408	2.3	0.0106525
CASD1	734	0.681199	0.30109	0.0177112	0.442	0.026	0.0588235	0.430799	2.13675	0.0180305
CASK	1144	0.603147	0.361888	0.034965	0.6	0.057971	0.0966184	0.567123	1.51982	0.0362319
CASKIN1	2094	0.617479	0.377268	0.0052531	0.610982	0.00850735	0.0139241	0.605828	1.61423	0.00528084
CASKIN2	2070	0.671981	0.321739	0.00628019	0.478792	0.00934579	0.0195195	0.474359	2.0486	0.00631988
CASP2	854	0.700234	0.290398	0.00936768	0.414716	0.0133779	0.0322581	0.409241	2.33594	0.00945626
CASP5	593	0.696459	0.278246	0.0252951	0.399516	0.0363196	0.0909091	0.385514	2.29444	0.0259516
CASP8	590	0.671186	0.298305	0.0305085	0.444444	0.0454545	0.102273	0.425121	2.04124	0.0314685
CASP8AP2	1925	0.713247	0.281039	0.00571429	0.394028	0.00801165	0.0203327	0.390896	2.48732	0.00574713
CASQ1	468	0.685897	0.275641	0.0384615	0.401869	0.0560748	0.139535	0.380531	2.18367	0.04
CASQ2	497	0.684105	0.291751	0.0241449	0.426471	0.0352941	0.0827586	0.411932	2.16561	0.0247423
CASR	1380	0.628986	0.353623	0.0173913	0.562212	0.0276498	0.0491803	0.547085	1.69531	0.0176991
CASS4	908	0.661894	0.329295	0.00881057	0.497504	0.0133111	0.0267559	0.490969	1.95765	0.00888889
CAST	974	0.714579	0.270021	0.0154004	0.377874	0.0215517	0.0570342	0.369902	2.5036	0.0156413
CASZ1	2430	0.630041	0.366667	0.00329218	0.581973	0.00522534	0.00897868	0.578947	1.703	0.00330306
CATSPER1	954	0.674004	0.29979	0.0262055	0.44479	0.0388802	0.0874126	0.428144	2.06752	0.0269107
CATSPER2	671	0.692996	0.275708	0.0312966	0.397849	0.0451613	0.113514	0.380658	2.25728	0.0323077
CATSPER3	461	0.698482	0.284165	0.0173536	0.406832	0.0248447	0.0610687	0.39697	2.31655	0.01766
CATSPER4	654	0.665138	0.298165	0.0366972	0.448276	0.0551724	0.123077	0.424837	1.9863	0.0380952
CATSPERB	1071	0.704015	0.266106	0.0298786	0.377984	0.0424403	0.112281	0.362595	2.37855	0.0307988
CATSPERG	1352	0.650148	0.318787	0.0310651	0.49033	0.0477816	0.0974478	0.46797	1.85835	0.0320611
CBFA2T2	668	0.628743	0.359281	0.011976	0.571429	0.0190476	0.0333333	0.560748	1.69355	0.0121212
CBFA2T3	2150	0.678605	0.311628	0.00976744	0.459219	0.0143934	0.0313433	0.452703	2.11143	0.00986379
CBFB	193	0.57513	0.404145	0.0207254	0.702703	0.036036	0.0512821	0.678261	1.35366	0.021164
CBL	1037	0.671167	0.309547	0.0192864	0.461207	0.0287356	0.0623053	0.448324	2.04106	0.0196657
CBLB	1047	0.667622	0.322827	0.0095511	0.483548	0.0143062	0.0295858	0.476728	2.00862	0.0096432
CBLC	700	0.651429	0.32	0.0285714	0.491228	0.0438596	0.0892857	0.470588	1.86885	0.0294118
CBLL1	563	0.657194	0.335702	0.0071048	0.510811	0.0108108	0.021164	0.505348	1.9171	0.00715564
CBLN2	248	0.548387	0.431452	0.0201613	0.786765	0.0367647	0.046729	0.758865	1.21429	0.0205761
CBLN4	210	0.57619	0.404762	0.0190476	0.702479	0.0330579	0.0470588	0.68	1.35955	0.0194175
CBS	894	0.631991	0.344519	0.0234899	0.545133	0.0371681	0.0681818	0.525597	1.71733	0.024055
CBX2	1106	0.647378	0.342676	0.00994575	0.52933	0.0153631	0.0290237	0.52132	1.8359	0.0100457
CBX4	728	0.627747	0.366758	0.00549451	0.584245	0.00875274	0.0149813	0.579176	1.68635	0.00552486
CBX6	548	0.607664	0.390511	0.00182482	0.642643	0.003003	0.0046729	0.640719	1.54884	0.00182815
CBX8	518	0.598456	0.393822	0.00772201	0.658065	0.0129032	0.0196078	0.649682	1.49038	0.0077821
CC2D1A	1294	0.66847	0.319938	0.011592	0.478613	0.017341	0.0362319	0.470455	2.01632	0.0117279
CC2D1B	1156	0.698962	0.279412	0.0216263	0.399752	0.0309406	0.0773994	0.387755	2.32184	0.0221043
CC2D2A	1893	0.692552	0.269942	0.0375066	0.389779	0.0541571	0.138943	0.369754	2.25258	0.0389682
CCAR1	893	0.648376	0.328108	0.0235162	0.506045	0.0362694	0.0716724	0.488333	1.84395	0.0240826
CCBE1	710	0.643662	0.322535	0.0338028	0.501094	0.0525164	0.104803	0.476091	1.80632	0.0349854
CCDC102A	1009	0.675917	0.311199	0.012884	0.460411	0.0190616	0.0414013	0.451799	2.08563	0.0130522
CCDC102B	686	0.727405	0.231778	0.0408163	0.318637	0.0561122	0.176101	0.301708	2.66845	0.0425532
CCDC105	1031	0.680892	0.302619	0.0164888	0.444444	0.0242165	0.0544872	0.433936	2.13374	0.0167653
CCDC110	909	0.716172	0.235424	0.0484048	0.328725	0.0675883	0.205607	0.307914	2.52326	0.0508671
CCDC114	934	0.678801	0.293362	0.0278373	0.432177	0.0410095	0.0948905	0.415152	2.11333	0.0286344
CCDC116	1049	0.702574	0.277407	0.0200191	0.394844	0.0284939	0.0721649	0.383905	2.36218	0.020428
CCDC120	706	0.684136	0.303116	0.0127479	0.443064	0.0186335	0.0420561	0.434959	2.16592	0.0129125
CCDC13	834	0.693046	0.282974	0.0239808	0.408304	0.0346021	0.0847458	0.394649	2.25781	0.02457
CCDC136	1540	0.664935	0.297403	0.0376623	0.447266	0.0566406	0.126638	0.42329	1.9845	0.0391363
CCDC138	872	0.670872	0.297018	0.0321101	0.442735	0.0478632	0.108108	0.422512	2.03833	0.0331754
CCDC14	1048	0.700382	0.262405	0.0372137	0.374659	0.0531335	0.141818	0.355757	2.33758	0.0386521
CCDC141	1849	0.695511	0.260141	0.0443483	0.374028	0.0637636	0.170478	0.351608	2.28419	0.0464063
CCDC144A	1447	0.689012	0.280581	0.0304077	0.407222	0.0441324	0.108374	0.39001	2.21556	0.0313614
CCDC146	1029	0.677357	0.273081	0.0495627	0.403156	0.0731707	0.181495	0.375668	2.0994	0.0521472
CCDC148	742	0.688679	0.264151	0.0471698	0.383562	0.0684932	0.178571	0.358974	2.21212	0.049505
CCDC15	1022	0.719178	0.237769	0.0430528	0.330612	0.0598639	0.18107	0.311938	2.56098	0.0449898
CCDC150	1311	0.678871	0.276888	0.044241	0.407865	0.0651685	0.15978	0.382911	2.11401	0.0462889
CCDC151	624	0.647436	0.3125	0.0400641	0.482673	0.0618812	0.128205	0.454545	1.83636	0.0417362
CCDC157	2054	0.669426	0.310613	0.0199611	0.464	0.0298182	0.0642633	0.450565	2.02504	0.0203676
CCDC158	1242	0.701288	0.259259	0.0394525	0.36969	0.0562572	0.152174	0.35	2.34771	0.0410729
CCDC166	609	0.650246	0.321839	0.0279146	0.494949	0.0429293	0.0867347	0.474576	1.85915	0.0287162
CCDC175	874	0.679634	0.28032	0.0400458	0.412458	0.0589226	0.142857	0.389507	2.12143	0.0417163
CCDC18	1968	0.673272	0.289126	0.0376016	0.429434	0.0558491	0.130053	0.406719	2.06065	0.0390707
CCDC27	1123	0.653606	0.30098	0.0454141	0.46049	0.0694823	0.150888	0.430573	1.88689	0.0475746
CCDC28A	333	0.672673	0.288288	0.039039	0.428571	0.0580357	0.135417	0.405063	2.05505	0.040625
CCDC30	2126	0.667451	0.308561	0.0239887	0.462297	0.0359408	0.0777439	0.446259	2.00707	0.0245783
CCDC33	1494	0.682731	0.283802	0.0334672	0.415686	0.0490196	0.117925	0.396262	2.1519	0.034626
CCDC38	676	0.684911	0.278107	0.0369822	0.406048	0.0539957	0.132979	0.385246	2.17371	0.0384025
CCDC39	1154	0.724437	0.250433	0.02513	0.345694	0.034689	0.100346	0.334104	2.62893	0.0257778
CCDC40	2159	0.677165	0.295044	0.0277906	0.435705	0.0410397	0.0941915	0.418528	2.09756	0.028585
CCDC50	597	0.664992	0.301508	0.0335008	0.453401	0.0503778	0.111111	0.431655	1.985	0.034662
CCDC54	363	0.716253	0.239669	0.0440771	0.334615	0.0615385	0.183908	0.315217	2.52427	0.0461095
CCDC57	1835	0.653951	0.312262	0.0337875	0.4775	0.0516667	0.108202	0.454041	1.88976	0.034969
CCDC6	399	0.573935	0.411028	0.0150376	0.716157	0.0262009	0.0365854	0.697872	1.34706	0.0152672
CCDC60	639	0.70892	0.258216	0.0328638	0.364238	0.0463576	0.127273	0.348101	2.43548	0.0339806
CCDC61	676	0.68787	0.281065	0.0310651	0.408602	0.0451613	0.110526	0.390947	2.20379	0.0320611
CCDC62	713	0.680224	0.28331	0.0364656	0.416495	0.0536082	0.128713	0.395303	2.12719	0.0378457
CCDC63	662	0.694864	0.271903	0.0332326	0.391304	0.0478261	0.122222	0.373444	2.27723	0.034375
CCDC66	1190	0.69916	0.246218	0.0546218	0.352163	0.078125	0.221843	0.326644	2.32402	0.0577778
CCDC68	359	0.690808	0.272981	0.0362117	0.395161	0.0524194	0.132653	0.375479	2.23423	0.0375723
CCDC73	1177	0.693288	0.272727	0.0339847	0.393382	0.0490196	0.124611	0.375	2.26039	0.0351803
CCDC8	769	0.691808	0.288687	0.0195059	0.417293	0.0281955	0.0675676	0.40585	2.24473	0.0198939
CCDC80	1111	0.69667	0.287129	0.0162016	0.412145	0.0232558	0.0564263	0.402778	2.29674	0.0164684
CCDC81	683	0.708638	0.245974	0.045388	0.347107	0.0640496	0.184524	0.326214	2.43216	0.047546
CCDC82	1314	0.705479	0.270928	0.0235921	0.384035	0.0334412	0.0870787	0.371608	2.39535	0.0241621
CCDC83	499	0.725451	0.248497	0.0260521	0.342541	0.0359116	0.104839	0.330667	2.64234	0.026749
CCDC85A	1104	0.662138	0.313406	0.0244565	0.473324	0.0369357	0.0780347	0.456464	1.95979	0.0250696
CCDC87	1892	0.674419	0.306025	0.019556	0.453762	0.0289969	0.0639033	0.440975	2.07143	0.0199461
CCDC88A	1770	0.675706	0.315254	0.00903955	0.466555	0.0133779	0.0286738	0.460396	2.08362	0.00912201
CCDC88B	2476	0.655897	0.315024	0.0290792	0.480296	0.044335	0.0923077	0.459906	1.9061	0.0299501
CCDC88C	2742	0.661926	0.320204	0.0178702	0.483747	0.0269972	0.0558087	0.47103	1.95793	0.0181953
CCDC9	858	0.685315	0.296037	0.018648	0.431973	0.0272109	0.0629921	0.42053	2.17778	0.0190024
CCDC93	814	0.674447	0.302211	0.0233415	0.448087	0.0346084	0.0772358	0.433099	2.0717	0.0238994
CCDC96	1703	0.675279	0.305344	0.0193776	0.452174	0.0286957	0.0634615	0.43956	2.07957	0.0197605
CCHCR1	1375	0.692364	0.273455	0.0341818	0.394958	0.0493697	0.125	0.376376	2.25059	0.0353916
CCIN	628	0.66242	0.321656	0.0159236	0.485577	0.0240385	0.049505	0.474178	1.96226	0.0161812
CCKAR	570	0.696491	0.289474	0.0140351	0.415617	0.0201511	0.0484848	0.407407	2.2948	0.0142349
CCKBR	753	0.693227	0.285525	0.0212483	0.411877	0.0306513	0.0744186	0.399628	2.25974	0.0217096
CCM2	647	0.633694	0.347759	0.0185471	0.54878	0.0292683	0.0533333	0.533175	1.72996	0.0188976
CCNA1	470	0.648936	0.325532	0.0255319	0.501639	0.0393443	0.0784314	0.48265	1.84848	0.0262009
CCNB3	955	0.709948	0.285864	0.00418848	0.402655	0.00589971	0.014652	0.400293	2.44765	0.0042061
CCND1	357	0.579832	0.408964	0.0112045	0.705314	0.0193237	0.0273973	0.691943	1.38	0.0113314
CCND2	285	0.536842	0.442105	0.0210526	0.823529	0.0392157	0.047619	0.792453	1.15909	0.0215054
CCND3	556	0.611511	0.366906	0.0215827	0.6	0.0352941	0.0588235	0.579545	1.57407	0.0220588
CCNE1	414	0.620773	0.371981	0.00724638	0.599222	0.0116732	0.0194805	0.592308	1.63694	0.00729927
CCNF	987	0.653495	0.329281	0.0172239	0.503876	0.0263566	0.0523077	0.490937	1.88596	0.0175258
CCNJL	756	0.645503	0.328042	0.026455	0.508197	0.0409836	0.0806452	0.488189	1.8209	0.0271739
CCNL1	516	0.612403	0.372093	0.0155039	0.607595	0.0253165	0.0416667	0.592593	1.58	0.015748
CCNL2	902	0.640798	0.345898	0.0133038	0.539792	0.0207612	0.0384615	0.528814	1.78395	0.0134831
CCNT1	736	0.668478	0.317935	0.013587	0.47561	0.0203252	0.042735	0.466135	2.01639	0.0137741
CCNT2	710	0.66338	0.325352	0.0112676	0.490446	0.0169851	0.034632	0.482255	1.97071	0.011396
CCP110	1032	0.70155	0.276163	0.0222868	0.393646	0.031768	0.0807018	0.381526	2.35065	0.0227948
CCPG1	1016	0.693898	0.280512	0.0255906	0.404255	0.0368794	0.0912281	0.389877	2.26688	0.0262626
CCR2	479	0.672234	0.304802	0.0229645	0.453416	0.0341615	0.0753425	0.438438	2.05096	0.0235043
CCR3	515	0.669903	0.314563	0.015534	0.469565	0.0231884	0.0493827	0.458924	2.02941	0.0157791
CCR4	372	0.604839	0.373656	0.0215054	0.617778	0.0355556	0.057554	0.596567	1.53061	0.021978
CCR5	512	0.705078	0.261719	0.0332031	0.371191	0.0470914	0.126866	0.354497	2.39073	0.0343434
CCR6	338	0.576923	0.402367	0.0207101	0.697436	0.0358974	0.0514706	0.673267	1.36364	0.021148
CCR7	378	0.595238	0.399471	0.00529101	0.671111	0.00888889	0.013245	0.665198	1.47059	0.00531915
CCR9	777	0.682111	0.306306	0.011583	0.449057	0.0169811	0.0378151	0.441558	2.14575	0.0117188
CCSER2	1201	0.723564	0.260616	0.0158201	0.360184	0.0218642	0.0607029	0.352477	2.61747	0.0160745
CCT3	636	0.707547	0.289308	0.00314465	0.408889	0.00444444	0.0108696	0.40708	2.41935	0.00315457
CCT5	622	0.660772	0.336013	0.00321543	0.508516	0.00486618	0.00956938	0.506053	1.94787	0.00322581
CCT6A	892	0.652466	0.343049	0.0044843	0.525773	0.00687285	0.0130719	0.522184	1.87742	0.0045045
CCT6B	1015	0.689655	0.291626	0.0187192	0.422857	0.0271429	0.0641892	0.411683	2.22222	0.0190763
CCT7	562	0.608541	0.386121	0.00533808	0.634503	0.00877193	0.0138249	0.628986	1.55455	0.00536673
CCT8	528	0.67803	0.314394	0.00757576	0.463687	0.0111732	0.0240964	0.458564	2.10588	0.00763359
CCT8L2	665	0.657143	0.315789	0.0270677	0.480549	0.0411899	0.0857143	0.461538	1.91667	0.0278207
CD101	1176	0.678571	0.289966	0.0314626	0.427318	0.0463659	0.108504	0.408383	2.11111	0.0324846
CD109	1615	0.699071	0.265015	0.0359133	0.379097	0.0513729	0.135514	0.360573	2.32305	0.0372511
CD163	1156	0.663495	0.311419	0.0250865	0.469361	0.0378096	0.0805556	0.452261	1.97172	0.025732
CD163L1	1600	0.6925	0.265	0.0425	0.382671	0.0613718	0.160377	0.360544	2.25203	0.0443864
CD180	730	0.691781	0.286301	0.0219178	0.413861	0.0316832	0.076555	0.401152	2.24444	0.022409
CD19	639	0.647887	0.336463	0.0156495	0.519324	0.0241546	0.0465116	0.507075	1.84	0.0158983
CD1A	462	0.655844	0.287879	0.0562771	0.438944	0.0858086	0.195489	0.404255	1.90566	0.059633
CD1B	574	0.6777	0.28223	0.0400697	0.416452	0.059126	0.141975	0.393204	2.1027	0.0417423
CD1C	483	0.691511	0.267081	0.0414079	0.386228	0.0598802	0.155039	0.364407	2.24161	0.0431965
CD1D	439	0.67426	0.298405	0.0273349	0.442568	0.0405405	0.0916031	0.425325	2.06993	0.028103
CD1E	527	0.643264	0.29981	0.056926	0.466077	0.0884956	0.189873	0.428184	1.80319	0.0603622
CD2	437	0.691076	0.292906	0.0160183	0.423841	0.0231788	0.0546875	0.414239	2.23704	0.0162791
CD200R1L	326	0.668712	0.300613	0.0306748	0.449541	0.0458716	0.102041	0.429825	2.01852	0.0316456
CD209	512	0.669922	0.275391	0.0546875	0.411079	0.0816327	0.198582	0.380054	2.02959	0.0578512
CD22	1015	0.649261	0.330049	0.0206897	0.508346	0.0318665	0.0626866	0.492647	1.85112	0.0211268
CD226	369	0.701897	0.284553	0.0135501	0.405405	0.019305	0.047619	0.397727	2.35455	0.0137363
CD248	942	0.651805	0.33121	0.0169851	0.508143	0.0260586	0.0512821	0.495238	1.87195	0.0172786
CD276	768	0.63151	0.34375	0.0247396	0.54433	0.0391753	0.0719697	0.52381	1.71378	0.0253672
CD2AP	678	0.710914	0.277286	0.0117994	0.390041	0.0165975	0.0425532	0.383673	2.45918	0.0119403
CD300LB	307	0.651466	0.312704	0.0358306	0.48	0.055	0.114583	0.454976	1.86916	0.0371622
CD300LG	502	0.681275	0.296813	0.0219124	0.435673	0.0321637	0.0738255	0.422096	2.1375	0.0224033
CD33	497	0.712274	0.261569	0.0261569	0.367232	0.0367232	0.1	0.354223	2.47552	0.0268595
CD36	824	0.730583	0.20267	0.0667476	0.277409	0.0913621	0.329341	0.254186	2.71171	0.0715215
CD4	536	0.654851	0.33209	0.0130597	0.507123	0.019943	0.0393258	0.497207	1.8973	0.0132325
CD44	940	0.68617	0.295745	0.0180851	0.431008	0.0263566	0.0611511	0.41994	2.18644	0.0184182
CD5	572	0.659091	0.318182	0.0227273	0.482759	0.0344828	0.0714286	0.466667	1.93333	0.0232558
CD5L	453	0.642384	0.293598	0.0640177	0.457045	0.0996564	0.218045	0.415625	1.7963	0.0683962
CD6	760	0.625	0.347368	0.0276316	0.555789	0.0442105	0.0795455	0.532258	1.66667	0.0284168
CD79B	248	0.556452	0.415323	0.0282258	0.746377	0.0507246	0.0679612	0.710345	1.25455	0.0290456
CD84	380	0.705263	0.278947	0.0157895	0.395522	0.0223881	0.0566038	0.386861	2.39286	0.0160428
CD86	340	0.717647	0.270588	0.0117647	0.377049	0.0163934	0.0434783	0.370968	2.54167	0.0119048
CD93	994	0.643863	0.326962	0.0291751	0.507812	0.0453125	0.0892308	0.4858	1.80791	0.0300518
CD96	1013	0.701876	0.271471	0.0266535	0.386779	0.0379747	0.0981818	0.372629	2.3543	0.0273834
CDAN1	1733	0.657819	0.323716	0.0184651	0.492105	0.0280702	0.057041	0.478669	1.92243	0.0188125
CDC14A	776	0.671392	0.305412	0.0231959	0.454894	0.0345489	0.0759494	0.439703	2.04314	0.0237467
CDC16	631	0.627575	0.351823	0.0206022	0.560606	0.0328283	0.0585586	0.542787	1.68511	0.0210356
CDC20B	849	0.693757	0.276796	0.0294464	0.398981	0.0424448	0.106383	0.382736	2.26538	0.0303398
CDC23	496	0.608871	0.375	0.016129	0.615894	0.0264901	0.0430108	0.6	1.5567	0.0163934
CDC25B	733	0.635744	0.354707	0.0095498	0.55794	0.0150215	0.0269231	0.549683	1.74532	0.00964187
CDC27	964	0.644191	0.324689	0.0311203	0.504026	0.0483092	0.0958466	0.480799	1.8105	0.0321199
CDC37	490	0.644898	0.344898	0.0102041	0.53481	0.0158228	0.0295858	0.52648	1.81609	0.0103093
CDC40	528	0.640152	0.348485	0.0113636	0.544379	0.0177515	0.0326087	0.534884	1.77895	0.0114943
CDC42BPA	1746	0.689003	0.29496	0.0160367	0.428096	0.0232751	0.0543689	0.418359	2.21547	0.016298
CDC42BPB	1926	0.603323	0.389408	0.00726895	0.645439	0.0120482	0.0186667	0.637755	1.52094	0.00732218
CDC42BPG	2407	0.612796	0.358122	0.0290818	0.584407	0.0474576	0.0812065	0.557929	1.58262	0.0299529
CDC45	747	0.692102	0.289157	0.0187416	0.417795	0.0270793	0.0648148	0.40678	2.24783	0.0190996
CDC5L	660	0.613636	0.378788	0.00757576	0.617284	0.0123457	0.02	0.609756	1.58824	0.00763359
CDC7	566	0.69788	0.275618	0.0265018	0.394937	0.0379747	0.0961538	0.380488	2.30994	0.0272232
CDC73	949	0.772392	0.207587	0.0200211	0.268759	0.0259209	0.0964467	0.261968	3.39352	0.0204301
CDCA2	1279	0.698984	0.284597	0.0164191	0.407159	0.0234899	0.0576923	0.397814	2.32208	0.0166932
CDCA7	428	0.698598	0.28271	0.0186916	0.404682	0.0267559	0.0661157	0.394137	2.31783	0.0190476
CDCA7L	633	0.666667	0.304897	0.028436	0.457346	0.042654	0.0932642	0.438636	2	0.0292683
CDCP1	946	0.662791	0.317125	0.0200846	0.478469	0.030303	0.0633333	0.464396	1.96552	0.0204962
CDCP2	777	0.666667	0.298584	0.034749	0.447876	0.0521236	0.116379	0.425688	2	0.036
CDH1	1922	0.655047	0.319979	0.024974	0.488483	0.0381255	0.0780488	0.470543	1.89894	0.0256137
CDH10	743	0.640646	0.339166	0.0201884	0.529412	0.0315126	0.0595238	0.513238	1.78277	0.0206044
CDH11	980	0.662245	0.333673	0.00408163	0.503852	0.00616333	0.0122324	0.500766	1.96073	0.00409836
CDH12	878	0.675399	0.307517	0.0170843	0.455312	0.0252951	0.0555556	0.444079	2.0807	0.0173812
CDH13	1259	0.634631	0.356632	0.00873709	0.561952	0.0137672	0.0244989	0.554321	1.73696	0.0088141
CDH15	1415	0.650177	0.324382	0.0254417	0.498913	0.0391304	0.0784314	0.480126	1.85859	0.0261059
CDH16	1119	0.683646	0.294013	0.0223414	0.430065	0.0326797	0.0759878	0.416456	2.16102	0.0228519
CDH17	966	0.692547	0.281573	0.0258799	0.406577	0.0373692	0.0919118	0.391931	2.25253	0.0265675
CDH18	858	0.679487	0.305361	0.0151515	0.4494	0.0222985	0.0496183	0.439597	2.12	0.0153846
CDH19	971	0.703399	0.270855	0.0257467	0.385066	0.0366032	0.095057	0.371469	2.37153	0.0264271
CDH2	1026	0.633528	0.346004	0.0204678	0.546154	0.0323077	0.0591549	0.529061	1.72872	0.0208955
CDH20	972	0.647119	0.345679	0.00720165	0.534181	0.0111288	0.0208333	0.528302	1.83382	0.00725389
CDH22	997	0.615848	0.367101	0.0170512	0.596091	0.0276873	0.0464481	0.580032	1.60313	0.0173469
CDH23	5412	0.661308	0.325942	0.0127494	0.492875	0.0192791	0.0391156	0.483553	1.95254	0.0129141
CDH24	1258	0.653418	0.321145	0.0254372	0.491484	0.0389294	0.0792079	0.473068	1.88532	0.0261011
CDH26	1190	0.667227	0.297479	0.0352941	0.445844	0.0528967	0.118644	0.423445	2.00505	0.0365854
CDH3	1152	0.644097	0.33941	0.0164931	0.526954	0.0256065	0.0485934	0.513798	1.80976	0.0167696
CDH4	1205	0.614108	0.379253	0.006639	0.617568	0.0108108	0.0175055	0.610963	1.5914	0.00668338
CDH5	1041	0.639769	0.342939	0.0172911	0.536036	0.027027	0.0504202	0.52193	1.776	0.0175953
CDH6	800	0.6175	0.36625	0.01625	0.593117	0.0263158	0.0443686	0.577909	1.61438	0.0165184
CDH7	833	0.619448	0.366146	0.0144058	0.591085	0.0232558	0.0393443	0.577652	1.62776	0.0146163
CDH8	795	0.637736	0.354717	0.00754717	0.556213	0.0118343	0.0212766	0.549708	1.76042	0.00760456
CDH9	886	0.660271	0.326185	0.013544	0.494017	0.0205128	0.0415225	0.484087	1.94352	0.01373
CDHR1	1424	0.642556	0.327247	0.0301966	0.50929	0.0469945	0.0922747	0.48643	1.79764	0.0311369
CDHR2	2403	0.658344	0.324594	0.017062	0.493047	0.0259166	0.0525641	0.480591	1.92692	0.0173582
CDHR3	1223	0.66067	0.304988	0.0343418	0.461634	0.0519802	0.112601	0.438824	1.94699	0.0355631
CDHR4	1121	0.661017	0.305977	0.0330062	0.462888	0.0499325	0.107872	0.440874	1.95	0.0341328
CDHR5	2272	0.626761	0.353433	0.0198063	0.563904	0.0316011	0.0560399	0.54663	1.67925	0.0202066
CDK11A	1183	0.627219	0.331361	0.0414201	0.528302	0.0660377	0.125	0.495575	1.68254	0.0432099
CDK11B	1010	0.536634	0.444554	0.0188119	0.828413	0.0350554	0.0423163	0.800357	1.15812	0.0191726
CDK12	1423	0.665495	0.330288	0.00421644	0.496304	0.0063358	0.012766	0.493179	1.9895	0.0042343
CDK13	1651	0.639007	0.347062	0.013931	0.543128	0.0218009	0.0401396	0.53154	1.77013	0.0141278
CDK14	508	0.639764	0.340551	0.019685	0.532308	0.0307692	0.0578035	0.516418	1.77596	0.0200803
CDK15	509	0.660118	0.300589	0.0392927	0.455357	0.0595238	0.130719	0.429775	1.9422	0.0408998
CDK17	398	0.61809	0.366834	0.0150754	0.593496	0.0243902	0.0410959	0.579365	1.61842	0.0153061
CDK18	684	0.684211	0.290936	0.0248538	0.425214	0.0363248	0.0854271	0.410309	2.16667	0.0254873
CDK19	702	0.603989	0.383191	0.0128205	0.634434	0.0212264	0.0334572	0.621247	1.52518	0.012987
CDK5RAP1	701	0.653352	0.309558	0.0370899	0.473799	0.0567686	0.119816	0.448347	1.88477	0.0385185
CDK5RAP2	2111	0.689247	0.284699	0.026054	0.413058	0.0378007	0.0915141	0.398013	2.21799	0.026751
CDK6	251	0.569721	0.422311	0.00796813	0.741259	0.013986	0.0188679	0.731034	1.32407	0.00803213
CDK8	288	0.524306	0.444444	0.03125	0.847682	0.0596026	0.0703125	0.8	1.10219	0.0322581
CDKAL1	637	0.654631	0.321821	0.0235479	0.491607	0.0359712	0.0731707	0.474537	1.89545	0.0241158
CDKL2	614	0.70684	0.249186	0.0439739	0.352535	0.062212	0.176471	0.331887	2.41111	0.0459966
CDKL5	1355	0.676753	0.264945	0.0583026	0.391494	0.0861505	0.220056	0.360442	2.09361	0.0619122
CDKN1A	326	0.723926	0.242331	0.0337423	0.334746	0.0466102	0.139241	0.319838	2.62222	0.0349206
CDKN1B	790	0.670886	0.321519	0.00759494	0.479245	0.0113208	0.023622	0.473881	2.03846	0.00765306
CDKN2A	875	0.670857	0.297143	0.032	0.44293	0.0477002	0.107692	0.422764	2.03819	0.0330579
CDON	1468	0.697548	0.282698	0.0197548	0.405273	0.0283203	0.0698795	0.394112	2.30631	0.0201529
CDR1	249	0.674699	0.277108	0.0481928	0.410714	0.0714286	0.173913	0.383333	2.07407	0.0506329
CDRT1	882	0.689342	0.286848	0.0238095	0.416118	0.0345395	0.083004	0.402226	2.21898	0.0243902
CDS1	397	0.702771	0.274559	0.02267	0.390681	0.0322581	0.0825688	0.378472	2.36441	0.0231959
CDX4	266	0.703008	0.278195	0.018797	0.395722	0.026738	0.0675676	0.385417	2.36709	0.0191571
CDYL	611	0.600655	0.382979	0.0163666	0.637602	0.027248	0.042735	0.62069	1.5041	0.0166389
CDYL2	753	0.621514	0.363878	0.0146082	0.58547	0.0235043	0.040146	0.572025	1.64211	0.0148248
CEACAM1	631	0.673534	0.304279	0.022187	0.451765	0.0329412	0.0729167	0.437358	2.06311	0.0226904
CEACAM16	650	0.649231	0.330769	0.02	0.509479	0.0308057	0.0604651	0.494253	1.85088	0.0204082
CEACAM18	448	0.698661	0.279018	0.0223214	0.399361	0.0319489	0.08	0.386997	2.31852	0.0228311
CEACAM20	734	0.668937	0.307902	0.0231608	0.460285	0.0346232	0.0752212	0.444882	2.02058	0.0237099
CEACAM5	891	0.652076	0.320988	0.026936	0.492255	0.0413081	0.0839161	0.472727	1.87419	0.0276817
CEACAM6	460	0.643478	0.33913	0.0173913	0.527027	0.027027	0.0512821	0.513158	1.80488	0.0176991
CEACAM7	364	0.706044	0.258242	0.0357143	0.365759	0.0505837	0.138298	0.348148	2.40187	0.037037
CEACAM8	523	0.690249	0.282983	0.0267686	0.409972	0.0387812	0.0945946	0.394667	2.2284	0.0275049
CEBPA	548	0.618613	0.366788	0.0145985	0.59292	0.0235988	0.039801	0.579251	1.62201	0.0148148
CEBPZ	1566	0.695402	0.291188	0.01341	0.418733	0.0192837	0.0460526	0.410811	2.28302	0.0135922
CECR2	1731	0.687464	0.304448	0.00808781	0.442857	0.0117647	0.0265655	0.437708	2.19963	0.00815376
CEL	1393	0.656856	0.328787	0.0143575	0.500546	0.0218579	0.0436681	0.48984	1.91423	0.0145666
CELF1	727	0.623109	0.371389	0.00550206	0.596026	0.00883002	0.0148148	0.59081	1.65328	0.0055325
CELF2	469	0.511727	0.484009	0.00426439	0.945833	0.00833333	0.00881057	0.938017	1.04803	0.00428266
CELF3	443	0.564334	0.41535	0.020316	0.736	0.036	0.048913	0.710425	1.29534	0.0207373
CELF4	710	0.616901	0.367606	0.015493	0.59589	0.0251142	0.0421456	0.581292	1.61029	0.0157368
CELF5	455	0.516484	0.479121	0.0043956	0.92766	0.00851064	0.00917431	0.919831	1.06818	0.00441501
CELF6	544	0.630515	0.356618	0.0128676	0.565598	0.0204082	0.0360825	0.554286	1.70647	0.0130354
CELSR1	4521	0.637912	0.35501	0.00707808	0.556519	0.0110957	0.0199377	0.550412	1.76176	0.00712854
CELSR2	3721	0.638001	0.353937	0.00806235	0.55476	0.0126369	0.022779	0.547837	1.76244	0.00812788
CELSR3	3688	0.643709	0.350054	0.00623644	0.543808	0.00968829	0.0178156	0.53859	1.8067	0.00627558
CENPB	698	0.565903	0.425501	0.00859599	0.751899	0.0151899	0.020202	0.740648	1.30363	0.00867052
CENPE	2426	0.706513	0.279472	0.0140148	0.395566	0.0198366	0.0501475	0.387872	2.4073	0.014214
CENPF	3240	0.698148	0.270062	0.0317901	0.386826	0.0455349	0.117714	0.369979	2.31288	0.0328339
CENPI	418	0.691388	0.30622	0.00239234	0.442907	0.00346021	0.0078125	0.441379	2.24031	0.00239808
CENPJ	1779	0.702642	0.258572	0.0387858	0.368	0.0552	0.15	0.348749	2.36295	0.0403509
CEP104	1342	0.694486	0.28614	0.0193741	0.412017	0.027897	0.0677083	0.400835	2.27317	0.0197568
CEP112	1093	0.698079	0.26258	0.0393413	0.376147	0.0563565	0.149826	0.356079	2.31212	0.0409524
CEP120	1128	0.711879	0.255319	0.0328014	0.358655	0.0460772	0.128472	0.342857	2.47077	0.0339138
CEP128	1255	0.699602	0.262948	0.0374502	0.375854	0.0535308	0.142424	0.356757	2.32891	0.0389073
CEP135	1188	0.705387	0.252525	0.0420875	0.357995	0.0596659	0.166667	0.337838	2.39429	0.0439367
CEP152	1881	0.69697	0.265284	0.0377459	0.380625	0.0541571	0.142285	0.361071	2.3	0.0392265
CEP164	2203	0.679074	0.290059	0.030867	0.427139	0.0454545	0.106416	0.408568	2.11598	0.0318501
CEP170	1540	0.699351	0.283766	0.0168831	0.405757	0.0241411	0.0594966	0.396192	2.32613	0.0171731
CEP192	2696	0.708828	0.267062	0.0241098	0.376766	0.0340136	0.0902778	0.364372	2.43439	0.0247054
CEP250	2678	0.666916	0.297237	0.0358476	0.445689	0.0537514	0.120603	0.422954	2.00224	0.0371805
CEP290	2558	0.684519	0.25645	0.0590305	0.374643	0.0862364	0.230183	0.3449	2.16976	0.0627337
CEP350	3113	0.723097	0.263733	0.0131706	0.364727	0.0182141	0.0499391	0.358202	2.61137	0.0133464
CEP57	755	0.646358	0.323179	0.0304636	0.5	0.0471311	0.0942623	0.477495	1.82772	0.0314208
CEP63	815	0.70184	0.244172	0.0539877	0.347902	0.0769231	0.221106	0.323052	2.35391	0.0570687
CEP68	1014	0.690335	0.294872	0.0147929	0.427143	0.0214286	0.0501672	0.418182	2.2293	0.015015
CEP70	718	0.696379	0.261838	0.0417827	0.376	0.06	0.159574	0.354717	2.29358	0.0436047
CEP72	1241	0.650282	0.32635	0.0233683	0.501859	0.0359356	0.0716049	0.48445	1.85945	0.0239274
CEP76	686	0.701166	0.263848	0.0349854	0.376299	0.049896	0.132597	0.358416	2.34634	0.0362538
CEP78	840	0.708333	0.255952	0.0357143	0.361345	0.0504202	0.139535	0.344	2.42857	0.037037
CEP85	830	0.687952	0.279518	0.0325301	0.406305	0.0472855	0.116379	0.38796	2.20463	0.0336239
CEP85L	954	0.688679	0.28826	0.0230608	0.418569	0.0334855	0.08	0.405007	2.21212	0.0236052
CEP89	1271	0.666404	0.295043	0.0385523	0.442739	0.0578512	0.130667	0.418527	1.99764	0.0400982
CEP95	1118	0.703936	0.259392	0.0366726	0.368488	0.0520966	0.141379	0.350242	2.37764	0.0380687
CEP97	868	0.678571	0.286866	0.0345622	0.42275	0.0509338	0.120482	0.402262	2.11111	0.0357995
CER1	419	0.708831	0.274463	0.0167064	0.387205	0.023569	0.0608696	0.378289	2.43443	0.0169903
CERCAM	815	0.667485	0.309202	0.0233129	0.463235	0.0349265	0.0753968	0.447602	2.00738	0.0238693
CERK	678	0.638643	0.339233	0.0221239	0.531178	0.034642	0.0652174	0.513393	1.76735	0.0226244
CERKL	815	0.695706	0.265031	0.0392638	0.380952	0.0564374	0.148148	0.360601	2.28629	0.0408685
CES1	774	0.677003	0.297158	0.0258398	0.438931	0.0381679	0.0869565	0.422794	2.096	0.0265252
CES2	868	0.554147	0.423963	0.0218894	0.765073	0.039501	0.0516304	0.736	1.24289	0.0223793
CES3	682	0.668622	0.300587	0.0307918	0.449561	0.0460526	0.102439	0.429769	2.0177	0.03177
CES4A	789	0.669202	0.295311	0.035488	0.441288	0.0530303	0.120172	0.419065	2.02299	0.0367937
CES5A	838	0.661098	0.298329	0.0405728	0.451264	0.0613718	0.136	0.42517	1.9507	0.0422886
CETN1	205	0.658537	0.317073	0.0243902	0.481481	0.037037	0.0769231	0.464286	1.92857	0.025
CETP	667	0.677661	0.292354	0.029985	0.431416	0.0442478	0.102564	0.413136	2.10233	0.0309119
CFB	918	0.639434	0.344227	0.0163399	0.53833	0.0255537	0.0474684	0.524917	1.77341	0.0166113
CFH	1436	0.674791	0.307103	0.0181058	0.455108	0.0268318	0.0589569	0.443216	2.07495	0.0184397
CFHR1	431	0.635731	0.315545	0.0487239	0.49635	0.0766423	0.154412	0.461017	1.74522	0.0512195
CFHR2	343	0.6793	0.259475	0.0612245	0.381974	0.0901288	0.235955	0.350394	2.11818	0.0652174
CFHR3	379	0.672823	0.269129	0.0580475	0.4	0.0862745	0.215686	0.368231	2.05645	0.0616246
CFHR4	780	0.674359	0.275641	0.05	0.408745	0.0741445	0.181395	0.380531	2.07087	0.0526316
CFHR5	769	0.691808	0.253576	0.0546164	0.366541	0.0789474	0.215385	0.339721	2.24473	0.0577717
CFI	762	0.685039	0.278215	0.0367454	0.40613	0.0536398	0.132075	0.385455	2.175	0.0381471
CFP	399	0.621554	0.348371	0.0300752	0.560484	0.0483871	0.0863309	0.534615	1.64238	0.0310078
CFTR	2577	0.719053	0.196352	0.0845945	0.273071	0.117647	0.43083	0.244326	2.55939	0.092412
CGN	1434	0.698745	0.257322	0.0439331	0.368263	0.0628743	0.170732	0.346479	2.31944	0.0459519
CGNL1	1842	0.709555	0.258958	0.0314875	0.364958	0.0443764	0.121593	0.349451	2.44299	0.0325112
CHAD	1067	0.678538	0.311153	0.0103093	0.458564	0.0151934	0.0331325	0.451701	2.11079	0.0104167
CHAF1A	1156	0.631488	0.364187	0.00432526	0.576712	0.00684932	0.0118765	0.572789	1.71362	0.00434405
CHAF1B	522	0.657088	0.329502	0.01341	0.501458	0.0204082	0.0406977	0.491429	1.9162	0.0135922
CHAT	1064	0.667293	0.304511	0.0281955	0.456338	0.0422535	0.0925926	0.437838	2.00565	0.0290135
CHD1	1338	0.648729	0.343049	0.00822123	0.528802	0.0126728	0.0239651	0.522184	1.84681	0.00828937
CHD1L	1303	0.697621	0.273983	0.028396	0.392739	0.0407041	0.103641	0.377378	2.30711	0.0292259
CHD2	1521	0.600263	0.368179	0.0315582	0.613363	0.0525739	0.0857143	0.582726	1.50164	0.0325866
CHD3	2070	0.584058	0.405314	0.010628	0.693962	0.0181969	0.0262217	0.68156	1.40418	0.0107422
CHD4	1514	0.570013	0.423382	0.00660502	0.742758	0.0115875	0.0156006	0.73425	1.32565	0.00664894
CHD5	1941	0.579598	0.410098	0.010304	0.707556	0.0177778	0.0251256	0.695197	1.37868	0.0104112
CHD6	2444	0.667349	0.325286	0.00736498	0.487431	0.0110362	0.0226415	0.48211	2.00615	0.00741962
CHD7	3177	0.649984	0.309411	0.0406043	0.476029	0.0624697	0.131231	0.44804	1.85701	0.0423228
CHD8	2923	0.488881	0.264454	0.246664	0.540938	0.504549	0.93273	0.359535	0.956493	0.32743
CHD9	2478	0.680387	0.309524	0.0100888	0.454923	0.014828	0.0325945	0.448276	2.12879	0.0101916
CHDH	962	0.648649	0.325364	0.0259875	0.501603	0.0400641	0.0798722	0.48228	1.84615	0.0266809
CHEK1	691	0.694645	0.269175	0.0361795	0.3875	0.0520833	0.134409	0.368317	2.27488	0.0375375
CHEK2	1957	0.723556	0.233521	0.0429228	0.32274	0.059322	0.183807	0.304667	2.61738	0.0448478
CHERP	1266	0.575039	0.417852	0.007109	0.726648	0.0123626	0.0170132	0.717775	1.35316	0.0071599
CHFR	870	0.64023	0.336782	0.0229885	0.526032	0.0359066	0.0682594	0.507799	1.77955	0.0235294
CHGB	808	0.67698	0.293317	0.029703	0.433272	0.0438757	0.101266	0.415061	2.09579	0.0306122
CHI3L1	528	0.651515	0.318182	0.030303	0.488372	0.0465116	0.0952381	0.466667	1.86957	0.03125
CHIA	684	0.675439	0.28655	0.0380117	0.424242	0.0562771	0.132653	0.401639	2.08108	0.0395137
CHIT1	597	0.678392	0.294807	0.0268007	0.434568	0.0395062	0.0909091	0.418052	2.10938	0.0275387
CHL1	1642	0.717418	0.271011	0.0115713	0.377759	0.016129	0.0426966	0.371763	2.53879	0.0117067
CHM	479	0.651357	0.300626	0.0480167	0.461538	0.0737179	0.159722	0.429851	1.86826	0.0504386
CHML	1203	0.644223	0.340815	0.0149626	0.529032	0.0232258	0.0439024	0.517024	1.81075	0.0151899
CHN1	542	0.669742	0.315498	0.0147601	0.471074	0.0220386	0.0467836	0.460916	2.02793	0.0149813
CHN2	856	0.681075	0.301402	0.0175234	0.442539	0.025729	0.0581395	0.431438	2.13553	0.0178359
CHPF	1460	0.623288	0.359589	0.0171233	0.576923	0.0274725	0.047619	0.561497	1.65455	0.0174216
CHPF2	1300	0.673846	0.294615	0.0315385	0.437215	0.0468037	0.10705	0.417666	2.06604	0.0325655
CHRD	1621	0.658236	0.326959	0.0148057	0.49672	0.022493	0.045283	0.485793	1.92599	0.0150282
CHRDL1	364	0.700549	0.28022	0.0192308	0.4	0.027451	0.0686275	0.389313	2.33945	0.0196078
CHRDL2	626	0.615016	0.353035	0.0319489	0.574026	0.0519481	0.0904977	0.545679	1.59751	0.0330033
CHRM1	414	0.572464	0.42029	0.00724638	0.734177	0.0126582	0.0172414	0.725	1.33898	0.00729927
CHRM2	416	0.641827	0.346154	0.0120192	0.539326	0.0187266	0.0347222	0.529412	1.79195	0.0121655
CHRM3	600	0.596667	0.395	0.00833333	0.662011	0.0139665	0.021097	0.652893	1.47934	0.00840336
CHRM4	520	0.576923	0.417308	0.00576923	0.723333	0.01	0.0138249	0.716172	1.36364	0.00580271
CHRM5	948	0.978903	0	0.021097	0	0.0215517		0	46.4	0.0215517
CHRNA1	601	0.667221	0.304493	0.0282862	0.456359	0.042394	0.0928962	0.437799	2.005	0.0291096
CHRNA10	715	0.647552	0.328671	0.0237762	0.507559	0.0367171	0.0723404	0.489583	1.8373	0.0243553
CHRNA2	770	0.668831	0.307792	0.0233766	0.460194	0.0349515	0.0759494	0.444653	2.01961	0.0239362
CHRNA3	664	0.59488	0.381024	0.0240964	0.640506	0.0405063	0.0632411	0.615572	1.4684	0.0246914
CHRNA4	1086	0.616943	0.364641	0.0184162	0.591045	0.0298507	0.0505051	0.573913	1.61058	0.0187617
CHRNA5	555	0.691892	0.284685	0.0234234	0.411458	0.0338542	0.0822785	0.397985	2.24561	0.0239852
CHRNA6	553	0.688969	0.282098	0.0289331	0.409449	0.0419948	0.102564	0.392947	2.21512	0.0297952
CHRNA9	572	0.68007	0.298951	0.020979	0.439589	0.0308483	0.0701754	0.426434	2.12568	0.0214286
CHRNB1	721	0.680999	0.299584	0.0194175	0.439919	0.0285132	0.0648148	0.427723	2.13478	0.019802
CHRNB2	692	0.622832	0.355491	0.0216763	0.570766	0.0348028	0.0609756	0.55157	1.65134	0.0221566
CHRNB3	492	0.658537	0.306911	0.0345528	0.466049	0.0524691	0.112583	0.442815	1.92857	0.0357895
CHRNB4	784	0.627551	0.362245	0.0102041	0.577236	0.0162602	0.028169	0.568	1.68493	0.0103093
CHRND	1111	0.672367	0.311431	0.0162016	0.463186	0.0240964	0.0520231	0.452288	2.0522	0.0164684
CHRNG	857	0.696616	0.268378	0.0350058	0.38526	0.0502513	0.130435	0.366826	2.29615	0.0362757
CHST1	509	0.59332	0.392927	0.0137525	0.662252	0.0231788	0.035	0.647249	1.45894	0.0139442
CHST10	415	0.607229	0.366265	0.026506	0.603175	0.0436508	0.0723684	0.577947	1.54601	0.0272277
CHST11	402	0.634328	0.348259	0.0174129	0.54902	0.027451	0.05	0.534351	1.73469	0.0177215
CHST12	724	0.635359	0.350829	0.0138122	0.552174	0.0217391	0.0393701	0.540426	1.74242	0.0140056
CHST13	564	0.664894	0.319149	0.0159574	0.48	0.024	0.05	0.46875	1.98413	0.0162162
CHST15	851	0.655699	0.321974	0.0223267	0.491039	0.0340502	0.0693431	0.47487	1.90444	0.0228365
CHST2	684	0.616959	0.366959	0.0160819	0.594787	0.0260664	0.0438247	0.579677	1.61069	0.0163447
CHST3	750	0.64	0.344	0.016	0.5375	0.025	0.0465116	0.52439	1.77778	0.0162602
CHST4	476	0.695378	0.262605	0.0420168	0.377644	0.060423	0.16	0.356125	2.28276	0.0438596
CHST5	695	0.640288	0.343885	0.0158273	0.537079	0.0247191	0.0460251	0.524123	1.78	0.0160819
CHST6	744	0.655914	0.307796	0.0362903	0.469262	0.0553279	0.117904	0.44466	1.90625	0.0376569
CHST7	441	0.575964	0.412698	0.0113379	0.716535	0.019685	0.0274725	0.702703	1.35829	0.0114679
CHST8	606	0.678218	0.306931	0.0148515	0.452555	0.0218978	0.0483871	0.442857	2.10769	0.0150754
CHST9	488	0.702869	0.262295	0.0348361	0.373178	0.0495627	0.132812	0.355556	2.36552	0.0360934
CHSY1	1100	0.640909	0.345455	0.0136364	0.539007	0.0212766	0.0394737	0.527778	1.78481	0.0138249
CHSY3	1090	0.663303	0.319266	0.0174312	0.481328	0.0262794	0.0545977	0.469003	1.97003	0.0177404
CHTF18	4055	0.62836	0.354377	0.0172626	0.563972	0.0274725	0.0487126	0.548892	1.69078	0.0175659
CHUK	621	0.653784	0.326892	0.0193237	0.5	0.0295567	0.0591133	0.485646	1.88837	0.0197044
CIC	2979	0.621014	0.373951	0.00503525	0.602162	0.00810811	0.013465	0.597319	1.63862	0.00506073
CIITA	2296	0.635889	0.348432	0.0156794	0.547945	0.0246575	0.045	0.534759	1.74641	0.0159292
CILP	1479	0.71332	0.252197	0.0344828	0.353555	0.0483412	0.136729	0.337251	2.48821	0.0357143
CILP2	1971	0.671233	0.312024	0.0167428	0.464853	0.0249433	0.0536585	0.45354	2.04167	0.0170279
CIT	1981	0.638062	0.348814	0.0131247	0.546677	0.0205696	0.0376266	0.535659	1.7629	0.0132992
CIZ1	1118	0.658318	0.316637	0.0250447	0.480978	0.0380435	0.079096	0.463351	1.9267	0.0256881
CKAP2	782	0.691816	0.280051	0.028133	0.404806	0.0406654	0.100457	0.388988	2.24481	0.0289474
CKAP2L	1000	0.713	0.261	0.026	0.366059	0.0364656	0.0996169	0.35318	2.48432	0.026694
CKAP4	773	0.641656	0.347995	0.0103493	0.542339	0.016129	0.0297398	0.53373	1.79061	0.0104575
CKAP5	1604	0.668329	0.32793	0.00374065	0.490672	0.00559701	0.0114068	0.487941	2.01504	0.00375469
CKM	636	0.602201	0.389937	0.00786164	0.64752	0.0130548	0.0201613	0.639175	1.51383	0.00792393
CKMT2	561	0.552585	0.404635	0.0427807	0.732258	0.0774194	0.105727	0.679641	1.23506	0.0446927
CLASP1	1570	0.631847	0.357962	0.0101911	0.566532	0.016129	0.0284698	0.55754	1.71626	0.010296
CLASP2	1376	0.640988	0.346657	0.0123547	0.540816	0.0192744	0.0356394	0.53059	1.78543	0.0125092
CLASRP	900	0.628889	0.351111	0.02	0.558304	0.0318021	0.056962	0.541096	1.69461	0.0204082
CLCA1	1016	0.687008	0.286417	0.0265748	0.416905	0.0386819	0.0927835	0.401379	2.19497	0.0273003
CLCA2	1109	0.660054	0.297565	0.0423805	0.45082	0.0642077	0.142424	0.42362	1.94164	0.0442561
CLCA4	990	0.718182	0.258586	0.0232323	0.360056	0.0323488	0.0898438	0.348774	2.54839	0.0237849
CLCN1	1357	0.667649	0.294768	0.0375829	0.441501	0.0562914	0.1275	0.417973	2.00887	0.0390505
CLCN2	1256	0.656847	0.318471	0.0246815	0.484848	0.0375758	0.0775	0.46729	1.91415	0.0253061
CLCN3	652	0.616564	0.371166	0.0122699	0.60199	0.0199005	0.0330579	0.590244	1.608	0.0124224
CLCN4	461	0.492408	0.507592	0	1.03084	0	0	1.03084	0.970085	0
CLCN5	509	0.664047	0.304519	0.0314342	0.45858	0.0473373	0.103226	0.437853	1.97661	0.0324544
CLCN6	975	0.637949	0.34359	0.0184615	0.538585	0.0289389	0.0537313	0.523438	1.76204	0.0188088
CLCN7	1137	0.569921	0.41073	0.0193492	0.720679	0.0339506	0.0471092	0.697015	1.32515	0.0197309
CLCNKA	978	0.643149	0.330266	0.0265849	0.513514	0.0413355	0.0804954	0.49313	1.80229	0.0273109
CLCNKB	1087	0.645814	0.323827	0.0303588	0.501425	0.0470085	0.09375	0.478912	1.82338	0.0313093
CLDN17	273	0.684982	0.282051	0.032967	0.411765	0.0481283	0.116883	0.392857	2.17442	0.0340909
CLEC14A	1491	0.642522	0.343394	0.0140845	0.534447	0.0219207	0.0410156	0.522983	1.79737	0.0142857
CLEC16A	1704	0.640845	0.346244	0.0129108	0.540293	0.0201465	0.0372881	0.529623	1.78431	0.0130797
CLEC1A	366	0.718579	0.237705	0.0437158	0.330798	0.0608365	0.183908	0.311828	2.5534	0.0457143
CLEC3A	372	0.725806	0.236559	0.0376344	0.325926	0.0518519	0.159091	0.309859	2.64706	0.0391061
CLEC4F	867	0.685121	0.28143	0.0334487	0.410774	0.0488215	0.118852	0.391653	2.17582	0.0346062
CLEC4M	524	0.614504	0.337786	0.0477099	0.549689	0.0776398	0.141243	0.510086	1.59406	0.0501002
CLGN	572	0.70979	0.243007	0.0472028	0.342365	0.0665025	0.194245	0.321016	2.44578	0.0495413
CLIC5	575	0.664348	0.309565	0.026087	0.465969	0.039267	0.0842697	0.448363	1.97927	0.0267857
CLIC6	1110	0.665766	0.311712	0.0225225	0.4682	0.0338295	0.0722543	0.45288	1.99191	0.0230415
CLINT1	597	0.696817	0.289782	0.0134003	0.415865	0.0192308	0.0462428	0.408019	2.29834	0.0135823
CLIP1	1409	0.662172	0.322924	0.0149042	0.487674	0.022508	0.0461538	0.476939	1.96008	0.0151297
CLIP2	1360	0.598529	0.391176	0.0102941	0.653563	0.017199	0.0263158	0.642512	1.49084	0.0104012
CLIP3	611	0.603928	0.386252	0.00981997	0.639566	0.0162602	0.0254237	0.629333	1.52479	0.00991736
CLIP4	784	0.6875	0.292092	0.0204082	0.424861	0.0296846	0.069869	0.412613	2.2	0.0208333
CLK1	586	0.682594	0.296928	0.0204778	0.435	0.03	0.0689655	0.42233	2.15054	0.0209059
CLK2	600	0.683333	0.305	0.0116667	0.446341	0.0170732	0.0382514	0.438849	2.15789	0.0118044
CLK3	1077	0.641597	0.342618	0.0157846	0.534009	0.024602	0.0460705	0.521186	1.79016	0.0160377
CLMN	1208	0.687086	0.288079	0.0248344	0.419277	0.0361446	0.0862069	0.404651	2.19577	0.0254669
CLN3	633	0.627172	0.334913	0.0379147	0.534005	0.0604534	0.113208	0.503563	1.6822	0.0394089
CLNK	610	0.7	0.265574	0.0344262	0.379391	0.0491803	0.12963	0.361607	2.33333	0.0356537
CLOCK	1225	0.71102	0.283265	0.00571429	0.398393	0.00803674	0.0201729	0.395216	2.46045	0.00574713
CLP1	342	0.654971	0.309942	0.0350877	0.473214	0.0535714	0.113208	0.449153	1.89831	0.0363636
CLPB	889	0.659168	0.314961	0.0258718	0.477816	0.0392491	0.0821429	0.45977	1.93399	0.0265589
CLPTM1	710	0.56338	0.421127	0.015493	0.7475	0.0275	0.0367893	0.727494	1.29032	0.0157368
CLPTM1L	788	0.612944	0.369289	0.0177665	0.602484	0.0289855	0.04811	0.585513	1.58361	0.0180879
CLPX	568	0.672535	0.315141	0.0123239	0.468586	0.0183246	0.0391061	0.460154	2.05376	0.0124777
CLSPN	1323	0.718065	0.261527	0.0204082	0.364211	0.0284211	0.0780347	0.354145	2.54692	0.0208333
CLSTN1	1202	0.648087	0.344426	0.00748752	0.531451	0.0115533	0.0217391	0.525381	1.84161	0.00754401
CLSTN2	1148	0.658537	0.329268	0.0121951	0.5	0.0185185	0.037037	0.490909	1.92857	0.0123457
CLSTN3	1338	0.671898	0.317638	0.0104634	0.472747	0.0155729	0.0329412	0.465498	2.04784	0.010574
CLTC	858	0.487179	0.494172	0.018648	1.01435	0.0382775	0.0377358	0.976959	0.95	0.0190024
CLTCL1	1956	0.68456	0.280675	0.0347648	0.410007	0.0507842	0.123862	0.390192	2.17018	0.0360169
CLU	552	0.628623	0.358696	0.0126812	0.570605	0.0201729	0.0353535	0.559322	1.69268	0.012844
CLUL1	552	0.672101	0.29529	0.0326087	0.439353	0.0485175	0.110429	0.419023	2.04972	0.0337079
CLVS1	343	0.632653	0.35277	0.0145773	0.557604	0.0230415	0.0413223	0.545045	1.72222	0.0147929
CLVS2	286	0.622378	0.36014	0.0174825	0.578652	0.0280899	0.0485437	0.562842	1.64815	0.0177936
CMIP	938	0.557569	0.438166	0.00426439	0.785851	0.00764818	0.00973236	0.779886	1.26024	0.00428266
CMKLR1	424	0.70283	0.283019	0.0141509	0.402685	0.0201342	0.05	0.394737	2.36508	0.0143541
CMYA5	4394	0.702094	0.266727	0.0311789	0.379903	0.0444084	0.116894	0.363749	2.35676	0.0321823
CNBD1	637	0.736264	0.215071	0.0486656	0.292111	0.0660981	0.226277	0.274	2.79167	0.0511551
CNDP1	639	0.679186	0.292645	0.028169	0.430876	0.0414747	0.0962567	0.413717	2.11707	0.0289855
CNDP2	616	0.667208	0.313312	0.0194805	0.469586	0.0291971	0.0621762	0.456265	2.00488	0.0198675
CNGA1	943	0.675504	0.288441	0.0360551	0.427002	0.0533752	0.125	0.405365	2.0817	0.0374037
CNGA2	628	0.679936	0.289809	0.0302548	0.42623	0.0444965	0.104396	0.408072	2.12438	0.0311987
CNGA3	964	0.681535	0.290456	0.0280083	0.42618	0.0410959	0.0964286	0.409357	2.14007	0.0288154
CNGA4	739	0.682003	0.290934	0.0270636	0.426587	0.0396825	0.0930233	0.410305	2.14468	0.0278164
CNGB1	1795	0.68078	0.293036	0.0261838	0.430442	0.0384615	0.0893536	0.4145	2.13264	0.0268879
CNGB3	1024	0.710938	0.24707	0.0419922	0.347527	0.0590659	0.16996	0.328145	2.45946	0.0438328
CNKSR1	1156	0.679931	0.290657	0.0294118	0.427481	0.043257	0.10119	0.409756	2.12432	0.030303
CNKSR2	539	0.597403	0.384045	0.0185529	0.642857	0.0310559	0.0483092	0.623494	1.48387	0.0189036
CNKSR3	717	0.641562	0.333333	0.0251046	0.519565	0.0391304	0.0753138	0.5	1.78988	0.0257511
CNNM1	1059	0.625118	0.365439	0.00944287	0.584592	0.0151057	0.0258398	0.575893	1.66751	0.00953289
CNNM2	859	0.521537	0.46915	0.00931315	0.899554	0.0178571	0.0198511	0.883772	1.09002	0.00940071
CNNM3	962	0.613306	0.367983	0.018711	0.6	0.0305085	0.0508475	0.582237	1.58602	0.0190678
CNNM4	936	0.602564	0.373932	0.0235043	0.620567	0.0390071	0.0628571	0.59727	1.51613	0.02407
CNOT1	1774	0.561443	0.434047	0.00450958	0.773092	0.00803213	0.0103896	0.766932	1.28021	0.00453001
CNOT10	723	0.709544	0.275242	0.0152144	0.387914	0.0214425	0.0552764	0.379771	2.44286	0.0154494
CNOT2	381	0.580052	0.414698	0.00524934	0.714932	0.00904977	0.0126582	0.70852	1.38125	0.00527704
CNOT3	1167	0.576692	0.414739	0.00856898	0.719168	0.0148588	0.0206612	0.708638	1.36235	0.00864304
CNOT4	600	0.61	0.383333	0.00666667	0.628415	0.010929	0.0173913	0.621622	1.5641	0.00671141
CNOT6	452	0.597345	0.387168	0.0154867	0.648148	0.0259259	0.04	0.631769	1.48352	0.0157303
CNR1	464	0.545259	0.443966	0.0107759	0.814229	0.0197628	0.0242718	0.79845	1.19905	0.0108932
CNST	1207	0.674399	0.305717	0.019884	0.453317	0.029484	0.0650407	0.440334	2.07125	0.0202874
CNTLN	2099	0.693664	0.262506	0.0438304	0.378434	0.0631868	0.166969	0.355943	2.26439	0.0458396
CNTN1	1004	0.656375	0.324701	0.0189243	0.494689	0.0288316	0.0582822	0.480826	1.91014	0.0192893
CNTN2	1367	0.651061	0.332114	0.0168252	0.510112	0.0258427	0.0506608	0.497262	1.86583	0.0171131
CNTN3	1057	0.661306	0.315043	0.0236518	0.476395	0.0357654	0.0750751	0.459945	1.95251	0.0242248
CNTN4	1197	0.654135	0.32665	0.0192147	0.499361	0.0293742	0.0588235	0.485112	1.8913	0.0195911
CNTN5	1443	0.713098	0.272349	0.014553	0.381924	0.0204082	0.0534351	0.374286	2.48551	0.0147679
CNTN6	1599	0.697311	0.266417	0.0362727	0.382063	0.0520179	0.13615	0.363171	2.30372	0.0376379
CNTNAP1	1857	0.515347	0.458805	0.0258481	0.890282	0.0501567	0.056338	0.847761	1.06333	0.026534
CNTNAP2	1731	0.686886	0.29405	0.0190641	0.428091	0.0277544	0.064833	0.41653	2.19373	0.0194346
CNTNAP3	1519	0.657011	0.317314	0.0256748	0.482966	0.0390782	0.0809129	0.464802	1.91555	0.0263514
CNTNAP3B	1794	0.691193	0.273133	0.0356745	0.395161	0.0516129	0.130612	0.375767	2.23827	0.0369942
CNTNAP4	1737	0.693725	0.28958	0.0166955	0.417427	0.0240664	0.0576541	0.407618	2.26504	0.0169789
CNTNAP5	1594	0.666876	0.314304	0.0188206	0.471308	0.028222	0.0598802	0.458371	2.00188	0.0191816
CNTRL	2368	0.697213	0.260557	0.0422297	0.373713	0.0605694	0.162075	0.35237	2.30265	0.0440917
CNTROB	1718	0.673458	0.306752	0.0197905	0.455488	0.0293863	0.0645161	0.442485	2.06239	0.02019
COASY	941	0.672689	0.30712	0.0201913	0.456556	0.0300158	0.0657439	0.443252	2.05519	0.0206074
COBL	1881	0.682616	0.307815	0.00956938	0.450935	0.0140187	0.0310881	0.4447	2.15075	0.00966184
COBLL1	1352	0.732988	0.252959	0.0140533	0.345106	0.0191726	0.0555556	0.338614	2.74515	0.0142536
COCH	667	0.676162	0.296852	0.0269865	0.439024	0.0399113	0.0909091	0.422175	2.08796	0.027735
COG1	1252	0.677316	0.297923	0.0247604	0.439858	0.0365566	0.0831099	0.424346	2.09901	0.025389
COG2	760	0.681579	0.307895	0.0105263	0.451737	0.015444	0.034188	0.444867	2.1405	0.0106383
COG3	763	0.663172	0.326343	0.0104849	0.492095	0.0158103	0.0321285	0.484436	1.96887	0.010596
COG4	1132	0.669611	0.312721	0.0176678	0.467018	0.0263852	0.0564972	0.455013	2.02674	0.0179856
COG5	1830	0.691257	0.285246	0.0234973	0.412648	0.0339921	0.0823755	0.399083	2.23894	0.0240627
COG6	841	0.707491	0.259215	0.0332937	0.366387	0.0470588	0.12844	0.34992	2.4187	0.0344403
COG7	813	0.667897	0.314883	0.0172202	0.471455	0.0257827	0.0546875	0.459605	2.01111	0.0175219
COG8	2321	0.617406	0.364929	0.0176648	0.591068	0.0286113	0.0484061	0.574627	1.61374	0.0179825
COIL	615	0.702439	0.282927	0.0146341	0.402778	0.0208333	0.0517241	0.394558	2.36066	0.0148515
COL10A1	1528	0.70288	0.28534	0.0117801	0.405959	0.0167598	0.0412844	0.399267	2.36564	0.0119205
COL11A1	2158	0.699259	0.287766	0.012975	0.411531	0.0185553	0.0450886	0.404034	2.32512	0.0131455
COL11A2	2234	0.654432	0.324978	0.0205909	0.49658	0.0314637	0.0633609	0.481432	1.89378	0.0210238
COL12A1	3319	0.687858	0.299187	0.0129557	0.434954	0.0188349	0.0433031	0.426913	2.20367	0.0131258
COL13A1	955	0.635602	0.348691	0.0157068	0.5486	0.0247117	0.045045	0.53537	1.74425	0.0159574
COL14A1	1887	0.666137	0.312666	0.0211977	0.469372	0.0318218	0.0677966	0.454896	1.99524	0.0216567
COL15A1	1754	0.698404	0.293044	0.00855188	0.419592	0.0122449	0.0291829	0.414516	2.31569	0.00862565
COL16A1	1980	0.667677	0.310606	0.0217172	0.465204	0.0325265	0.0699187	0.450549	2.00912	0.0221993
COL17A1	1987	0.693508	0.285858	0.0206341	0.412192	0.0297533	0.0721831	0.400282	2.26273	0.0210689
COL18A1	3827	0.62451	0.365038	0.0104521	0.584519	0.0167364	0.0286328	0.574897	1.66319	0.0105625
COL19A1	1338	0.687593	0.292975	0.019432	0.426087	0.0282609	0.0663265	0.414376	2.20096	0.0198171
COL1A1	2156	0.670686	0.306122	0.0231911	0.456432	0.0345781	0.0757576	0.441176	2.03662	0.0237417
COL1A2	1962	0.707951	0.287462	0.00458716	0.406048	0.00647948	0.0159574	0.403433	2.42408	0.00460829
COL20A1	2290	0.636681	0.332314	0.0310044	0.521948	0.0486968	0.0932983	0.497711	1.7524	0.0319964
COL21A1	1160	0.665517	0.29569	0.0387931	0.444301	0.0582902	0.131195	0.419829	1.98969	0.0403587
COL22A1	2241	0.686747	0.294065	0.0191879	0.4282	0.0279402	0.0652504	0.416561	2.19231	0.0195632
COL23A1	801	0.639201	0.342072	0.0187266	0.535156	0.0292969	0.0547445	0.519924	1.77163	0.019084
COL24A1	2001	0.716142	0.254373	0.0294853	0.355199	0.0411724	0.115914	0.341153	2.52289	0.0303811
COL25A1	748	0.668449	0.314171	0.0173797	0.47	0.026	0.0553191	0.45809	2.01613	0.0176871
COL27A1	2572	0.671073	0.318818	0.0101089	0.475087	0.0150637	0.0317073	0.468037	2.04019	0.0102121
COL28A1	1549	0.722402	0.253712	0.0238864	0.351206	0.0330652	0.0941476	0.339965	2.60233	0.0244709
COL2A1	1780	0.64382	0.33764	0.0185393	0.524433	0.0287958	0.0549085	0.509754	1.80757	0.0188895
COL3A1	1947	0.678993	0.305085	0.0159219	0.449319	0.0234493	0.0521886	0.439024	2.1152	0.0161795
COL4A1	1833	0.624659	0.372068	0.00327332	0.595633	0.00524017	0.00879765	0.592528	1.66424	0.00328407
COL4A2	2424	0.645215	0.332921	0.0218647	0.515985	0.0338875	0.0656753	0.499072	1.8186	0.0223534
COL4A3	1842	0.699783	0.28013	0.0200869	0.40031	0.0287044	0.0717054	0.38914	2.33092	0.0204986
COL4A4	2259	0.682603	0.298805	0.0185923	0.437743	0.0272374	0.0622222	0.426136	2.15063	0.0189445
COL4A5	1676	0.73926	0.22136	0.0393795	0.299435	0.0532688	0.177898	0.284291	2.83524	0.0409938
COL4A6	1332	0.666667	0.320571	0.0127628	0.480856	0.0191441	0.0398126	0.471823	2	0.0129278
COL5A1	2468	0.635737	0.350486	0.0137763	0.551307	0.0216699	0.0393064	0.539613	1.74527	0.0139688
COL5A2	1572	0.69084	0.308524	0.000636132	0.446593	0.00092081	0.00206186	0.446182	2.23457	0.000636537
COL5A3	2328	0.669674	0.313574	0.0167526	0.468249	0.025016	0.0534247	0.456821	2.02731	0.017038
COL6A1	1638	0.6337	0.355311	0.010989	0.560694	0.017341	0.0309278	0.551136	1.73	0.0111111
COL6A2	2179	0.631941	0.349702	0.018357	0.553377	0.0290487	0.0524934	0.537756	1.71696	0.0187003
COL6A3	4230	0.687943	0.297636	0.0144208	0.432646	0.0209622	0.0484512	0.423763	2.20455	0.0146318
COL6A5	2708	0.703102	0.263663	0.0332349	0.375	0.0472689	0.12605	0.358074	2.36816	0.0343774
COL6A6	2571	0.716842	0.256709	0.0264489	0.358112	0.0368964	0.10303	0.345369	2.53159	0.0271674
COL7A1	3650	0.673699	0.30274	0.0235616	0.44937	0.0349736	0.0778281	0.434185	2.06465	0.0241302
COL8A1	788	0.666244	0.319797	0.0139594	0.48	0.0209524	0.0436508	0.470149	1.9962	0.014157
COL8A2	966	0.612836	0.372671	0.0144928	0.608108	0.0236486	0.0388889	0.594059	1.58289	0.0147059
COL9A1	1243	0.659694	0.312953	0.0273532	0.47439	0.0414634	0.0874036	0.455504	1.93853	0.0281224
COL9A2	975	0.672821	0.309744	0.0174359	0.460366	0.0259146	0.0562914	0.448737	2.05643	0.0177453
COL9A3	1365	0.645421	0.339927	0.014652	0.526674	0.0227015	0.0431034	0.514983	1.82025	0.0148699
COLEC10	320	0.70625	0.278125	0.015625	0.393805	0.0221239	0.0561798	0.385281	2.40426	0.015873
COLEC11	678	0.612094	0.379056	0.00884956	0.619277	0.0144578	0.0233463	0.610451	1.57795	0.00892857
COLEC12	774	0.647287	0.339793	0.0129199	0.52495	0.0199601	0.0380228	0.514677	1.83516	0.013089
COLQ	623	0.698234	0.269663	0.0321027	0.386207	0.045977	0.119048	0.369231	2.31383	0.0331675
COMP	1009	0.666997	0.305253	0.0277502	0.457652	0.0416048	0.0909091	0.439372	2.00298	0.0285423
COPA	1048	0.668893	0.329198	0.0019084	0.492154	0.00285307	0.0057971	0.490754	2.02017	0.00191205
COPB1	776	0.679124	0.315722	0.00515464	0.464896	0.00759013	0.0163265	0.461394	2.11647	0.00518135
COPB2	862	0.653132	0.336427	0.0104408	0.515098	0.0159858	0.0310345	0.506993	1.88294	0.010551
COPS2	213	0.488263	0.507042	0.00469484	1.03846	0.00961538	0.00925926	1.02857	0.954128	0.00471698
CORIN	1346	0.697623	0.263001	0.0393759	0.376997	0.056443	0.149718	0.356855	2.30713	0.0409899
CORO1A	571	0.583187	0.406305	0.0105079	0.696697	0.018018	0.0258621	0.684366	1.39916	0.0106195
CORO1B	1560	0.647436	0.34359	0.00897436	0.530693	0.0138614	0.0261194	0.523438	1.83636	0.00905563
CORO1C	476	0.64916	0.340336	0.0105042	0.524272	0.0161812	0.0308642	0.515924	1.8503	0.0106157
CORO2A	628	0.651274	0.320064	0.0286624	0.491443	0.0440098	0.0895522	0.470726	1.86758	0.0295082
CORO2B	488	0.637295	0.35041	0.0122951	0.549839	0.0192926	0.0350877	0.539432	1.75706	0.0124481
CORO6	805	0.693168	0.280745	0.026087	0.405018	0.0376344	0.0929204	0.390328	2.25911	0.0267857
CORO7	2473	0.646583	0.334412	0.0190053	0.517198	0.0293934	0.0568319	0.50243	1.82952	0.0193735
COX10	622	0.659164	0.324759	0.0160772	0.492683	0.0243902	0.049505	0.480952	1.93396	0.0163399
CP	1244	0.676849	0.299035	0.0241158	0.441805	0.0356295	0.0806452	0.426606	2.09453	0.0247117
CPA1	510	0.645098	0.321569	0.0333333	0.49848	0.0516717	0.103659	0.473988	1.81768	0.0344828
CPA2	486	0.693416	0.273663	0.0329218	0.394659	0.0474777	0.120301	0.376771	2.26174	0.0340426
CPA3	529	0.733459	0.226843	0.0396975	0.309278	0.0541237	0.175	0.293399	2.75177	0.0413386
CPA4	513	0.645224	0.309942	0.0448343	0.480363	0.0694864	0.144654	0.449153	1.81868	0.0469388
CPA5	623	0.645265	0.324238	0.0304976	0.502488	0.0472637	0.0940594	0.47981	1.819	0.031457
CPA6	553	0.717902	0.235081	0.0470163	0.327456	0.0654912	0.2	0.307329	2.54487	0.0493359
CPAMD8	2669	0.662046	0.317347	0.020607	0.479344	0.0311262	0.0649351	0.464874	1.95898	0.0210406
CPB1	481	0.694387	0.259875	0.045738	0.374251	0.0658683	0.176	0.351124	2.27211	0.0479303
CPB2	444	0.612613	0.353604	0.0337838	0.577206	0.0551471	0.0955414	0.547038	1.5814	0.034965
CPD	1262	0.670365	0.316957	0.0126783	0.472813	0.0189125	0.04	0.464037	2.03365	0.0128411
CPE	469	0.667377	0.319829	0.0127932	0.479233	0.0191693	0.04	0.470219	2.00641	0.012959
CPEB2	1416	0.64548	0.33404	0.0204802	0.517505	0.0317287	0.0613108	0.501591	1.82072	0.0209084
CPEB3	804	0.636816	0.349502	0.0136816	0.548828	0.0214844	0.0391459	0.537285	1.75342	0.0138714
CPEB4	577	0.627383	0.363951	0.00866551	0.58011	0.0138122	0.0238095	0.572207	1.68372	0.00874126
CPED1	1251	0.685052	0.282174	0.0327738	0.411902	0.0478413	0.116147	0.393096	2.17513	0.0338843
CPN1	582	0.646048	0.328179	0.0257732	0.507979	0.0398936	0.078534	0.488491	1.82524	0.026455
CPN2	704	0.615057	0.362216	0.0227273	0.588915	0.0369515	0.0627451	0.567929	1.59779	0.0232558
CPNE1	636	0.699686	0.275157	0.0251572	0.393258	0.0359551	0.0914286	0.37961	2.32984	0.0258065
CPNE2	637	0.623234	0.357928	0.0188383	0.574307	0.0302267	0.0526316	0.557457	1.65417	0.0192
CPNE3	639	0.70579	0.250391	0.0438185	0.354767	0.0620843	0.175	0.334029	2.39894	0.0458265
CPNE4	559	0.62254	0.364937	0.0125224	0.586207	0.0201149	0.0343137	0.574648	1.64929	0.0126812
CPNE5	830	0.60241	0.373494	0.0240964	0.62	0.04	0.0645161	0.596154	1.51515	0.0246914
CPNE6	830	0.512048	0.46747	0.0204819	0.912941	0.04	0.0438144	0.877828	1.04938	0.0209102
CPNE7	1250	0.624	0.3488	0.0272	0.558974	0.0435897	0.0779817	0.535627	1.65957	0.0279605
CPNE8	537	0.648045	0.337058	0.0148976	0.520115	0.0229885	0.0441989	0.508427	1.84127	0.0151229
CPNE9	727	0.638239	0.34663	0.0151307	0.543103	0.0237069	0.0436508	0.530526	1.76426	0.0153631
CPS1	1866	0.642015	0.338692	0.0192926	0.527546	0.0300501	0.056962	0.512156	1.79341	0.0196721
CPSF2	561	0.631016	0.336898	0.0320856	0.533898	0.0508475	0.0952381	0.508065	1.71014	0.0331492
CPSF3	561	0.613191	0.363636	0.0231729	0.593023	0.0377907	0.0637255	0.571429	1.58525	0.0237226
CPSF6	418	0.538278	0.461722	0	0.857778	0	0	0.857778	1.1658	0
CPT1A	921	0.64278	0.322476	0.0347448	0.501689	0.0540541	0.107744	0.475962	1.79939	0.0359955
CPT1B	1086	0.617864	0.354512	0.0276243	0.57377	0.0447094	0.0779221	0.549215	1.61687	0.0284091
CPT1C	1196	0.648829	0.331104	0.0200669	0.510309	0.0309278	0.0606061	0.495	1.84762	0.0204778
CPVL	556	0.703237	0.267986	0.028777	0.381074	0.0409207	0.107383	0.366093	2.3697	0.0296296
CPXCR1	242	0.727273	0.227273	0.0454545	0.3125	0.0625	0.2	0.294118	2.66667	0.047619
CPXM1	896	0.652902	0.323661	0.0234375	0.495726	0.0358974	0.0724138	0.478548	1.88103	0.024
CPXM2	1032	0.686047	0.284884	0.0290698	0.415254	0.0423729	0.102041	0.398374	2.18519	0.0299401
CPZ	1609	0.66128	0.307023	0.0316967	0.464286	0.0479323	0.103239	0.443049	1.95229	0.0327343
CR1	2194	0.695077	0.283956	0.0209663	0.408525	0.0301639	0.0738363	0.396563	2.27952	0.0214153
CR1L	742	0.672507	0.285714	0.041779	0.42485	0.0621242	0.146226	0.4	2.0535	0.0436006
CR2	1215	0.687243	0.283128	0.0296296	0.411976	0.0431138	0.104651	0.394948	2.19737	0.0305344
CRAT	911	0.639956	0.339188	0.0208562	0.530017	0.0325901	0.0614887	0.513289	1.77744	0.0213004
CRB1	1807	0.704483	0.264527	0.0309906	0.375491	0.0439906	0.117155	0.359669	2.3839	0.0319817
CRB2	1934	0.649431	0.330403	0.0201655	0.508758	0.031051	0.0610329	0.493436	1.85251	0.0205805
CREB3L1	680	0.65	0.338235	0.0117647	0.520362	0.0180995	0.0347826	0.511111	1.85714	0.0119048
CREB3L2	679	0.689249	0.297496	0.0132548	0.431624	0.0192308	0.0445545	0.42348	2.21801	0.0134328
CREB3L3	663	0.625943	0.339367	0.0346908	0.542169	0.0554217	0.102222	0.513699	1.67339	0.0359375
CREB5	959	0.672576	0.311783	0.0156413	0.463566	0.0232558	0.0501672	0.45303	2.05414	0.0158898
CREBBP	2867	0.593652	0.381932	0.0244158	0.643361	0.0411281	0.0639269	0.617946	1.46094	0.0250268
CRHBP	340	0.682353	0.308824	0.00882353	0.452586	0.012931	0.0285714	0.446809	2.14815	0.00890208
CRHR1	523	0.625239	0.344168	0.0305927	0.550459	0.0489297	0.0888889	0.524781	1.66837	0.0315582
CRHR2	629	0.664547	0.294118	0.0413355	0.442584	0.062201	0.140541	0.416667	1.98104	0.0431177
CRIM1	1338	0.661435	0.328102	0.0104634	0.496045	0.0158192	0.0318907	0.48832	1.95364	0.010574
CRISP1	362	0.70442	0.254144	0.0414365	0.360784	0.0588235	0.163043	0.340741	2.38318	0.0432277
CRISP2	348	0.70977	0.244253	0.045977	0.34413	0.0647773	0.188235	0.323194	2.44554	0.0481928
CRISP3	365	0.69589	0.276712	0.0273973	0.397638	0.0393701	0.0990099	0.382576	2.28829	0.028169
CRISPLD1	540	0.727778	0.240741	0.0314815	0.330789	0.043257	0.130769	0.317073	2.67347	0.0325048
CRISPLD2	832	0.675481	0.302885	0.0216346	0.448399	0.0320285	0.0714286	0.434483	2.08148	0.022113
CRLF2	475	0.64	0.311579	0.0484211	0.486842	0.0756579	0.155405	0.452599	1.77778	0.050885
CRMP1	633	0.579779	0.412322	0.00789889	0.711172	0.013624	0.0191571	0.701613	1.3797	0.00796178
CRNKL1	1390	0.667626	0.311511	0.0208633	0.466595	0.03125	0.0669746	0.452456	2.00866	0.0213079
CRNN	618	0.669903	0.281553	0.0485437	0.42029	0.0724638	0.172414	0.391892	2.02941	0.0510204
CROCC	3547	0.664787	0.309839	0.0253736	0.466073	0.0381679	0.0818926	0.448938	1.98318	0.0260341
CROT	674	0.716617	0.235905	0.0474777	0.329193	0.0662526	0.201258	0.308738	2.5288	0.0498442
CRP	288	0.645833	0.315972	0.0381944	0.489247	0.0591398	0.120879	0.461929	1.82353	0.0397112
CRTAC1	1334	0.661169	0.329085	0.00974513	0.497732	0.0147392	0.0296128	0.490503	1.95133	0.00984103
CRTAM	439	0.685649	0.284738	0.0296128	0.415282	0.0431894	0.104	0.398089	2.18116	0.0305164
CRTC1	919	0.57889	0.415669	0.0054407	0.718045	0.0093985	0.013089	0.711359	1.37468	0.00547046
CRTC2	1366	0.664714	0.324305	0.010981	0.487885	0.0165198	0.03386	0.479957	1.98253	0.0111029
CRTC3	771	0.640726	0.342412	0.0168612	0.534413	0.0263158	0.0492424	0.52071	1.78339	0.0171504
CRX	393	0.631043	0.351145	0.0178117	0.556452	0.0282258	0.0507246	0.541176	1.71034	0.0181347
CRY1	627	0.639553	0.325359	0.0350877	0.508728	0.0548628	0.107843	0.48227	1.77434	0.0363636
[truncated: 7,488 more rows]
