# Supplementary material for: Use of signals of positive and negative selection to distinguish cancer genes and passenger genes
Source: eLife. 2021 Jan 11;10:e59629. doi: 10.7554/eLife.59629 (PMC7877913; doi:10.7554/eLife.59629)
Supplement: Supplementary file 7. [file elife-59629-supp7.xlsx]

## Sheet: Supplementary file 7
Gene name	fSs	rSMs	rSMNs	CG_SO2SD_rSMN>0.5		fSg	rSMg	rSMNg
MLLT3	0.626866	1.76842	1.68	1.68		0.488532	0.955157	0.955157
YTHDF3	0.585034	1.50877	1.40984	1.40984		0.357873	0.559105	0.557325
TBP	0.573913	1.375	1.34694	1.34694		0.384444	0.64794	0.624549
HOXD10	0.531792	1.19481	1.1358	1.1358		0.324263	0.49481	0.479866
ZBTB26	0.514706	1.07692	1.06061	1.06061		0.353503	0.566327	0.546798
UBC	0.509434	1.10204	1.03846	1.03846		0.721841	2.67029	2.59507
RUNX2	0.507246	1.1413	1.02941	1.02941		0.352291	0.5575	0.543902
PPP2R3B	0.490196	0.986842	0.961538	0.961538		0.379574	0.634424	0.611797
EXT1	0.48368	0.987879	0.936782	0.936782		0.336207	0.543825	0.506494
ENTPD2	0.481481	1	0.928571	0.928571		0.3	0.448276	0.428571
CDCP2	0.472222	0.910714	0.894737	0.894737		0.298584	0.447876	0.425688
FOXG1	0.46519	0.90184	0.869822	0.869822		0.42953	0.817891	0.752941
SOX1	0.456897	0.84127	0.84127	0.84127		0.445361	0.80597	0.802974
LCOR	0.442623	0.830769	0.794118	0.794118		0.304825	0.443028	0.438486
SLC16A3	0.441176	0.882353	0.789474	0.789474		0.375	0.606481	0.6
CRP	0.440678	0.8	0.787879	0.787879		0.315972	0.489247	0.461929
RGR	0.44	0.814815	0.785714	0.785714		0.348131	0.570881	0.53405
MTNR1A	0.438356	0.831169	0.780488	0.780488		0.606695	1.74699	1.54255
ZNF92	0.438053	0.811475	0.779528	0.779528		0.256528	0.358369	0.345041
CACNG2	0.438017	0.883333	0.779412	0.779412		0.373089	0.598039	0.595122
ZNF319	0.43662	0.805195	0.775	0.775		0.411494	0.724696	0.699219
GP5	0.434783	0.808081	0.769231	0.769231		0.330226	0.508197	0.493042
MSL2	0.434483	0.84	0.768293	0.768293		0.501205	1.01961	1.00483
NEUROD6	0.4329	0.840336	0.763359	0.763359		0.558824	1.34118	1.26667
NOVA1	0.431548	0.833333	0.759162	0.759162		0.630719	1.72321	1.70796
KRTAP5-4	0.429752	0.753623	0.753623	0.753623		0.34359	0.536	0.523438
LHFPL3	0.428571	0.813559	0.75	0.75		0.367188	0.594937	0.580247
MATR3	0.425	0.778626	0.73913	0.73913		0.360955	0.569845	0.564835
OPRL1	0.424837	0.747126	0.738636	0.738636		0.523726	1.15953	1.09963
ADRA1B	0.422018	0.730159	0.730159	0.730159		0.329268	0.503106	0.490909
GPR31	0.42	0.724138	0.724138	0.724138		0.325167	0.496599	0.481848
MFAP3L	0.417323	0.736111	0.716216	0.716216		0.433702	0.777228	0.765854
OR4X2	0.417112	0.735849	0.715596	0.715596		0.338028	0.539326	0.510638
SLC18A3	0.416988	0.734694	0.715232	0.715232		0.351127	0.552239	0.541133
HAPLN4	0.416667	0.75	0.714286	0.714286		0.353618	0.561358	0.547074
PRLHR	0.416149	0.728261	0.712766	0.712766		0.319182	0.487981	0.468822
CYP27A1	0.416	0.742857	0.712329	0.712329		0.295276	0.45	0.418994
TRIM50	0.414062	0.746479	0.706667	0.706667		0.335129	0.519199	0.504052
TMEM79	0.412281	0.734375	0.701493	0.701493		0.283713	0.40806	0.396088
ENG	0.412281	0.770492	0.701493	0.701493		0.311718	0.487544	0.452893
KCNC1	0.412037	0.712	0.700787	0.700787		0.469965	0.895623	0.886667
MAPK13	0.411765	0.711864	0.7	0.7		0.336887	0.530201	0.508039
TSSK6	0.411765	0.75	0.7	0.7		0.760181	4	3.16981
SLC25A6	0.409836	0.746269	0.694444	0.694444		0.37988	0.634085	0.612591
CHST12	0.409722	0.694118	0.694118	0.694118		0.350829	0.552174	0.540426
PRKACG	0.409091	0.692308	0.692308	0.692308		0.291925	0.427273	0.412281
OR4D1	0.409091	0.762712	0.692308	0.692308		0.416667	0.763359	0.714286
MMP14	0.408759	0.708861	0.691358	0.691358		0.44405	0.811688	0.798722
GJA3	0.408333	0.765625	0.690141	0.690141		0.361526	0.579787	0.566234
IRF3	0.407407	0.721311	0.6875	0.6875		0.368138	0.6	0.582624
OR10H2	0.407407	0.723684	0.6875	0.6875		0.481818	0.957831	0.929825
OR2A2	0.40678	0.712871	0.685714	0.685714		0.473016	0.925466	0.89759
LRRC8A	0.406091	0.720721	0.683761	0.683761		0.458937	0.865604	0.848214
OR5AK2	0.405797	0.691358	0.682927	0.682927		0.401235	0.738636	0.670103
GRPR	0.405594	0.698795	0.682353	0.682353		0.363958	0.581921	0.572222
GJB4	0.405405	0.692308	0.681818	0.681818		0.298969	0.442748	0.426471
MESP2	0.405405	0.692308	0.681818	0.681818		0.430328	0.836653	0.755396
SLC6A20	0.404762	0.723404	0.68	0.68		0.344262	0.552632	0.525
LRRTM2	0.402878	0.727273	0.674699	0.674699		0.345882	0.540441	0.528777
RBM4	0.401639	0.680556	0.671233	0.671233		0.49711	1.01575	0.988506
ITGA11	0.401294	0.696629	0.67027	0.67027		0.342225	0.532389	0.520277
OR4C3	0.40099	0.698276	0.669421	0.669421		0.385542	0.671329	0.627451
CETP	0.4	0.727273	0.666667	0.666667		0.292354	0.431416	0.413136
TMEM130	0.4	0.7	0.666667	0.666667		0.318761	0.484765	0.467914
ZNF517	0.4	0.666667	0.666667	0.666667		0.31972	0.489286	0.469983
PACSIN2	0.4	0.753623	0.666667	0.666667		0.368327	0.6	0.583099
HOXA11	0.4	0.763636	0.666667	0.666667		0.370558	0.58871	0.58871
ZNF629	0.4	0.698413	0.666667	0.666667		0.384454	0.632124	0.624573
HOXD3	0.398693	0.693182	0.663043	0.663043		0.329457	0.508982	0.491329
TBC1D24	0.398649	0.710843	0.662921	0.662921		0.37534	0.627273	0.600871
SLC2A8	0.398148	0.68254	0.661538	0.661538		0.303725	0.453961	0.436214
ZNF503	0.398148	0.671875	0.661538	0.661538		0.399296	0.669617	0.664714
KCNG4	0.398104	0.717949	0.661417	0.661417		0.313929	0.476341	0.457576
GFPT2	0.397849	0.678899	0.660714	0.660714		0.350856	0.552987	0.54049
DHCR7	0.397059	0.675	0.658537	0.658537		0.337909	0.548885	0.510367
SLC2A1	0.397059	0.675	0.658537	0.658537		0.376	0.638587	0.602564
MYADM	0.397059	0.658537	0.658537	0.658537		0.653333	2.07042	1.88462
SNX8	0.396825	0.694444	0.657895	0.657895		0.375969	0.615222	0.602484
NTNG2	0.396476	0.676692	0.656934	0.656934		0.601276	1.59746	1.508
OR1G1	0.396226	0.65625	0.65625	0.65625		0.44186	0.863636	0.791667
TBR1	0.396135	0.683333	0.656	0.656		0.392102	0.858025	0.645012
HNRNPR	0.395522	0.670886	0.654321	0.654321		0.387168	0.643382	0.631769
OR6M1	0.395522	0.697368	0.654321	0.654321		0.42471	0.797101	0.738255
EGR4	0.394495	0.68254	0.651515	0.651515		0.365079	0.585987	0.575
TBXA2R	0.394161	0.692308	0.650602	0.650602		0.347645	0.55902	0.532909
SLC45A4	0.393836	0.66092	0.649718	0.649718		0.368231	0.598592	0.582857
SLCO4A1	0.393204	0.658537	0.648	0.648		0.34904	0.558659	0.536193
CHRM4	0.393103	0.686747	0.647727	0.647727		0.417308	0.723333	0.716172
ZNRF4	0.393035	0.675214	0.647541	0.647541		0.348422	0.553377	0.534737
THBD	0.392857	0.662651	0.647059	0.647059		0.345494	0.542088	0.527869
CRISPLD2	0.392523	0.65625	0.646154	0.646154		0.302885	0.448399	0.434483
SLC45A1	0.391705	0.669291	0.643939	0.643939		0.361516	0.58125	0.56621
SLC47A1	0.390977	0.712329	0.641975	0.641975		0.305671	0.461378	0.440239
KCNJ11	0.390909	0.661538	0.641791	0.641791		0.263345	0.37	0.357488
SSTR5	0.390476	0.650794	0.640625	0.640625		0.357751	0.572207	0.557029
FOXD4	0.390244	0.666667	0.64	0.64		0.29596	0.434718	0.420373
NPTX2	0.390244	0.653061	0.64	0.64		0.54902	1.29801	1.21739
PCDHA9	0.389961	0.655844	0.639241	0.639241		0.333567	0.522503	0.500526
EHD3	0.389744	0.672566	0.638655	0.638655		0.362671	0.584352	0.569048
SLC7A10	0.389706	0.646341	0.638554	0.638554		0.364348	0.596017	0.573187
TRPV4	0.389121	0.664286	0.636986	0.636986		0.347524	0.554017	0.532623
PCDHGA12	0.389034	0.639485	0.636752	0.636752		0.289908	0.420213	0.408269
ZNF135	0.388889	0.730435	0.636364	0.636364		0.303879	0.463054	0.436533
SLC1A7	0.388889	0.648148	0.636364	0.636364		0.327713	0.504052	0.487461
GPR108	0.388889	0.690141	0.636364	0.636364		0.341019	0.533207	0.517495
CX3CR1	0.388889	0.666667	0.636364	0.636364		0.341176	0.529197	0.517857
CBX6	0.388889	0.636364	0.636364	0.636364		0.390511	0.642643	0.640719
LHFPL5	0.38835	0.655738	0.634921	0.634921		0.275862	0.395604	0.380952
OR10G8	0.38835	0.650407	0.634921	0.634921		0.422741	0.767196	0.732323
GJA8	0.388278	0.658385	0.634731	0.634731		0.327613	0.503597	0.487239
MRGPRX1	0.388	0.659864	0.633987	0.633987		0.406818	0.718876	0.685824
HCRTR1	0.387931	0.671642	0.633803	0.633803		0.311611	0.463845	0.452668
SLC9A3	0.38785	0.65873	0.633588	0.633588		0.409584	0.702326	0.693721
HSPA2	0.387435	0.637931	0.632479	0.632479		0.486556	0.959596	0.947631
EEF1D	0.387097	0.64	0.631579	0.631579		0.357169	0.568593	0.555619
OR1F1	0.386861	0.638554	0.630952	0.630952		0.355932	0.580645	0.552632
IGSF21	0.386364	0.653846	0.62963	0.62963		0.308176	0.453704	0.445455
GAA	0.386266	0.647482	0.629371	0.629371		0.299762	0.451526	0.428085
TRIB2	0.386139	0.639344	0.629032	0.629032		0.385802	0.631313	0.628141
SYT7	0.386076	0.655914	0.628866	0.628866		0.362637	0.579965	0.568966
SLC6A18	0.385965	0.637681	0.628571	0.628571		0.326338	0.507341	0.484424
FZD2	0.385787	0.655172	0.628099	0.628099		0.407821	0.711039	0.688679
FOXI1	0.385542	0.653061	0.627451	0.627451		0.330841	0.501416	0.494413
CACNB1	0.385321	0.688525	0.626866	0.626866		0.33245	0.508097	0.498016
PSEN2	0.385321	0.646154	0.626866	0.626866		0.373984	0.608466	0.597403
OR2C1	0.385321	0.636364	0.626866	0.626866		0.48318	1.03268	0.934911
LMX1B	0.385185	0.666667	0.626506	0.626506		0.3829	0.647799	0.620482
BTN3A1	0.384615	0.671642	0.625	0.625		0.257576	0.36342	0.346939
TBX10	0.384615	0.666667	0.625	0.625		0.318991	0.484234	0.46841
HOXB3	0.384615	0.652174	0.625	0.625		0.361995	0.579092	0.567385
OR2T34	0.384615	0.652174	0.625	0.625		0.375723	0.631068	0.601852
KCNK3	0.384615	0.652174	0.625	0.625		0.413276	0.712177	0.70438
OR2A5	0.384259	0.633588	0.62406	0.62406		0.452899	0.925926	0.827815
DAGLB	0.384146	0.649485	0.623762	0.623762		0.321659	0.488796	0.474185
RPN2	0.383929	0.704918	0.623188	0.623188		0.291755	0.418816	0.41194
PNKP	0.383929	0.671875	0.623188	0.623188		0.354062	0.572123	0.548137
PRF1	0.383333	0.64486	0.621622	0.621622		0.315327	0.478095	0.46055
OR2B11	0.383234	0.666667	0.621359	0.621359		0.46875	0.931677	0.882353
CALB2	0.383178	0.650794	0.621212	0.621212		0.324561	0.497758	0.480519
OR1C1	0.383085	0.647059	0.620968	0.620968		0.431579	0.798701	0.759259
PLBD2	0.382609	0.6875	0.619718	0.619718		0.290859	0.425101	0.410156
UPF3A	0.382609	0.656716	0.619718	0.619718		0.321995	0.499121	0.474916
ITPRIP	0.38255	0.626374	0.619565	0.619565		0.327586	0.510331	0.487179
CLCN7	0.382514	0.648148	0.619469	0.619469		0.41073	0.720679	0.697015
GPR26	0.381944	0.632184	0.617978	0.617978		0.416244	0.728889	0.713043
NXN	0.380952	0.648649	0.615385	0.615385		0.557895	1.30864	1.2619
GABRD	0.380645	0.614583	0.614583	0.614583		0.409478	0.71097	0.693416
HS3ST3A1	0.380531	0.623188	0.614286	0.614286		0.332353	0.510158	0.497797
FUS	0.380282	0.666667	0.613636	0.613636		0.397143	0.681373	0.658768
NCK2	0.380282	0.642857	0.613636	0.613636		0.792373	4.34884	3.81633
OR2A12	0.380117	0.643564	0.613208	0.613208		0.408511	0.732824	0.690647
PRR5	0.37963	0.650794	0.61194	0.61194		0.328267	0.498845	0.488688
OR8B12	0.378882	0.616162	0.61	0.61		0.430435	0.779528	0.755725
KRT85	0.378698	0.633663	0.609524	0.609524		0.303207	0.451193	0.435146
DMRT3	0.378531	0.644231	0.609091	0.609091		0.318237	0.479705	0.466786
PRSS38	0.378378	0.674699	0.608696	0.608696		0.300847	0.44795	0.430303
KCNN4	0.378378	0.646154	0.608696	0.608696		0.35489	0.581395	0.550122
EHD4	0.377778	0.653846	0.607143	0.607143		0.356269	0.578164	0.553444
RTN4RL1	0.377049	0.630137	0.605263	0.605263		0.399657	0.67147	0.665714
GRM6	0.376847	0.64557	0.604743	0.604743		0.328727	0.514221	0.489707
FUT1	0.376623	0.623656	0.604167	0.604167		0.320726	0.488479	0.47216
AP1M1	0.376147	0.621212	0.602941	0.602941		0.481959	0.958974	0.930348
KLHDC8A	0.376	0.643836	0.602564	0.602564		0.323913	0.5	0.4791
SLC5A2	0.375661	0.645455	0.601695	0.601695		0.336775	0.52802	0.507784
OR10G7	0.375661	0.612069	0.601695	0.601695		0.378747	0.637615	0.609649
PRAMEF2	0.375	0.634615	0.6	0.6		0.287698	0.4209	0.4039
KRT82	0.375	0.642857	0.6	0.6		0.293814	0.435946	0.416058
S1PR3	0.375	0.623377	0.6	0.6		0.319035	0.481781	0.468504
OR10H1	0.375	0.606742	0.6	0.6		0.457227	0.885714	0.842391
ABCG8	0.374429	0.640625	0.59854	0.59854		0.269006	0.38379	0.368
SLC22A11	0.374332	0.625	0.598291	0.598291		0.328515	0.50813	0.489237
BDKRB2	0.37415	0.662651	0.597826	0.597826		0.345098	0.538226	0.526946
IRF2BPL	0.37415	0.597826	0.597826	0.597826		0.393538	0.666966	0.648908
ZNF730	0.374046	0.604938	0.597561	0.597561		0.254545	0.358209	0.341463
NGFR	0.374046	0.620253	0.597561	0.597561		0.512262	1.12575	1.05028
OR6C65	0.373984	0.621622	0.597403	0.597403		0.388393	0.679688	0.635036
FEM1A	0.373913	0.651515	0.597222	0.597222		0.362864	0.594433	0.569524
SLC46A2	0.373832	0.625	0.597015	0.597015		0.303797	0.456057	0.436364
CCNJL	0.373832	0.655738	0.597015	0.597015		0.328042	0.508197	0.488189
CCDC116	0.373418	0.602041	0.59596	0.59596		0.277407	0.394844	0.383905
NMUR2	0.373134	0.617284	0.595238	0.595238		0.409704	0.72381	0.694064
AP1B1	0.373134	0.614754	0.595238	0.595238		0.410837	0.70202	0.697324
IRGQ	0.373016	0.652778	0.594937	0.594937		0.384683	0.638889	0.625179
KCNN2	0.372807	0.643939	0.594406	0.594406		0.380157	0.625202	0.613312
PRKAR1B	0.372727	0.630769	0.594203	0.594203		0.409506	0.704403	0.693498
SERPINA5	0.372671	0.625	0.594059	0.594059		0.316265	0.474041	0.462555
KRT15	0.372222	0.614679	0.59292	0.59292		0.302439	0.46384	0.433566
OR2W3	0.372197	0.614815	0.592857	0.592857		0.44012	0.816667	0.786096
FOXP2	0.372014	0.641176	0.592391	0.592391		0.356546	0.576577	0.554113
ASMTL	0.371429	0.601852	0.590909	0.590909		0.361538	0.577573	0.566265
TBX19	0.371212	0.690141	0.590361	0.590361		0.318271	0.47929	0.466859
PGC	0.370968	0.621622	0.589744	0.589744		0.303892	0.452116	0.436559
BTBD17	0.370968	0.597403	0.589744	0.589744		0.367534	0.609137	0.581114
ACTA1	0.370861	0.602151	0.589474	0.589474		0.544513	1.2767	1.19545
SLC20A2	0.370787	0.622642	0.589286	0.589286		0.383978	0.640553	0.623318
PCDHA11	0.370656	0.617363	0.588957	0.588957		0.00625782	0.00629723	0.00629723
AQP7	0.370629	0.595506	0.588889	0.588889		0.291096	0.434783	0.410628
VIPR1	0.37037	0.615385	0.588235	0.588235		0.297904	0.454338	0.424307
ANKS3	0.37037	0.655738	0.588235	0.588235		0.319224	0.480106	0.468912
BARHL2	0.37037	0.60241	0.588235	0.588235		0.331373	0.502976	0.495601
ZNF813	0.37013	0.606383	0.587629	0.587629		0.252538	0.353464	0.337861
SLC26A6	0.37013	0.606383	0.587629	0.587629		0.339825	0.531202	0.514749
SLC12A7	0.370107	0.619048	0.587571	0.587571		0.392192	0.664969	0.645257
FCN2	0.370079	0.602564	0.5875	0.5875		0.315126	0.483871	0.460123
SEC14L4	0.369748	0.619718	0.586667	0.586667		0.310912	0.479263	0.451193
GP1BA	0.369565	0.621951	0.586207	0.586207		0.315358	0.472759	0.460616
IL12RB1	0.369369	0.672131	0.585714	0.585714		0.330071	0.518881	0.492696
MSN	0.369318	0.643564	0.585586	0.585586		0.486792	0.977273	0.948529
ACKR3	0.369048	0.596154	0.584906	0.584906		0.433684	0.774436	0.765799
CBLN4	0.368932	0.59375	0.584615	0.584615		0.404762	0.702479	0.68
EME2	0.368932	0.655172	0.584615	0.584615		0.426626	0.769414	0.744061
OR11G2	0.368421	0.642202	0.583333	0.583333		0.418868	0.776224	0.720779
SLC34A2	0.368231	0.610778	0.582857	0.582857		0.329437	0.509868	0.491284
KCNQ1	0.368098	0.612245	0.582524	0.582524		0.279613	0.409681	0.388143
OTX1	0.368	0.605263	0.582278	0.582278		0.392947	0.658228	0.647303
ST3GAL1	0.367925	0.58209	0.58209	0.58209		0.375321	0.608333	0.600823
STC2	0.367742	0.640449	0.581633	0.581633		0.377581	0.618357	0.606635
TREML2	0.367647	0.609756	0.581395	0.581395		0.294239	0.44	0.41691
SLC41A1	0.367188	0.626667	0.580247	0.580247		0.368914	0.58982	0.58457
QSOX1	0.367021	0.605263	0.579832	0.579832		0.317073	0.478528	0.464286
SLC35F3	0.366516	0.609023	0.578571	0.578571		0.37397	0.61186	0.597368
ARHGEF16	0.366412	0.592593	0.578313	0.578313		0.331256	0.512862	0.495342
CYP4F11	0.366379	0.607143	0.578231	0.578231		0.290476	0.422877	0.409396
TNK1	0.366337	0.587302	0.578125	0.578125		0.299685	0.440495	0.427928
RPS6KL1	0.366337	0.616667	0.578125	0.578125		0.3	0.444023	0.428571
SLC24A3	0.366142	0.592357	0.57764	0.57764		0.37988	0.620098	0.612591
PUF60	0.366071	0.585714	0.577465	0.577465		0.503497	1.05109	1.01408
CHST4	0.365854	0.6	0.576923	0.576923		0.262605	0.377644	0.356125
PRAM1	0.365591	0.576271	0.576271	0.576271		0.322971	0.488251	0.477041
EHD1	0.365517	0.602273	0.576087	0.576087		0.426332	0.755556	0.743169
MOS	0.365385	0.606383	0.575758	0.575758		0.423077	0.760638	0.733333
OR10P1	0.365217	0.575342	0.575342	0.575342		0.432787	0.790419	0.763006
ALPL	0.364641	0.594595	0.573913	0.573913		0.339489	0.54195	0.513978
FBXL18	0.364583	0.583333	0.57377	0.57377		0.357427	0.576184	0.556242
BCL11A	0.364532	0.582677	0.573643	0.573643		0.399177	0.685512	0.664384
OR5AU1	0.364486	0.590909	0.573529	0.573529		0.431746	0.809524	0.759777
CHRNG	0.364407	0.605634	0.573333	0.573333		0.268378	0.38526	0.366826
LRRC14B	0.364407	0.605634	0.573333	0.573333		0.329032	0.512048	0.490385
ZNF71	0.364407	0.614286	0.573333	0.573333		0.339646	0.531621	0.51434
OR5B2	0.364341	0.5875	0.573171	0.573171		0.366438	0.59116	0.578378
SLITRK1	0.364312	0.606811	0.573099	0.573099		0.342747	0.526627	0.521484
SPATA20	0.364078	0.609756	0.572519	0.572519		0.294957	0.430556	0.418354
ACTL9	0.364017	0.583893	0.572368	0.572368		0.289515	0.421412	0.407489
ANGPTL2	0.363636	0.656716	0.571429	0.571429		0.336237	0.523035	0.506562
PDE6B	0.362934	0.594937	0.569697	0.569697		0.302194	0.45281	0.433063
S1PR5	0.362832	0.569444	0.569444	0.569444		0.367893	0.591398	0.582011
ENPP7	0.362573	0.596154	0.568807	0.568807		0.283837	0.409867	0.39633
PTX4	0.3625	0.591837	0.568627	0.568627		0.282353	0.414508	0.393443
PRR23C	0.362069	0.583333	0.567568	0.567568		0.31407	0.478927	0.457875
CACNG5	0.362069	0.583333	0.567568	0.567568		0.317549	0.476987	0.465306
WDR18	0.362069	0.591549	0.567568	0.567568		0.378299	0.618705	0.608491
RHO	0.361538	0.580247	0.566265	0.566265		0.307839	0.461318	0.444751
SERPINA6	0.361538	0.580247	0.566265	0.566265		0.309751	0.465517	0.448753
GGN	0.361446	0.571429	0.566038	0.566038		0.303946	0.445264	0.436671
TAS2R1	0.361111	0.604651	0.565217	0.565217		0.271468	0.385827	0.372624
TFAP2D	0.361111	0.594286	0.565217	0.565217		0.361377	0.569277	0.565868
OR2Y1	0.361111	0.590909	0.565217	0.565217		0.405797	0.732026	0.682927
DLL1	0.361111	0.59542	0.565217	0.565217		0.421832	0.737864	0.7296
CPN2	0.360656	0.605505	0.564103	0.564103		0.362216	0.588915	0.567929
BIN1	0.360656	0.619718	0.564103	0.564103		0.378197	0.625835	0.608225
ST8SIA5	0.360544	0.569892	0.56383	0.56383		0.333333	0.522152	0.5
NDST1	0.360406	0.581967	0.563492	0.563492		0.698324	2.43506	2.31481
TSC22D2	0.360294	0.597561	0.563218	0.563218		0.356719	0.55796	0.554531
LIN54	0.36019	0.603175	0.562963	0.562963		0.352087	0.544944	0.543417
HSD3B1	0.36	0.616438	0.5625	0.5625		0.294118	0.434272	0.416667
TMEM214	0.36	0.592105	0.5625	0.5625		0.327465	0.509124	0.486911
ATP2B3	0.36	0.579399	0.5625	0.5625		0.380151	0.621733	0.613297
HIC1	0.36	0.5625	0.5625	0.5625		0.41994	0.734155	0.723958
CHRNB2	0.359788	0.571429	0.561983	0.561983		0.355491	0.570766	0.55157
SLC8A3	0.359712	0.59761	0.561798	0.561798		0.297153	0.432642	0.422785
VSIG1	0.359649	0.585714	0.561644	0.561644		0.289973	0.428	0.408397
BPI	0.359281	0.612245	0.560748	0.560748		0.277473	0.394531	0.38403
GSDMB	0.359223	0.637931	0.560606	0.560606		0.263804	0.373913	0.358333
SARDH	0.359223	0.596774	0.560606	0.560606		0.314244	0.477146	0.458244
DIRAS3	0.359223	0.578125	0.560606	0.560606		0.354244	0.55814	0.548571
SKOR2	0.359223	0.616667	0.560606	0.560606		0.371134	0.6	0.590164
PROM2	0.359184	0.590604	0.56051	0.56051		0.331151	0.515284	0.495105
CRHR2	0.359155	0.586207	0.56044	0.56044		0.294118	0.442584	0.416667
P2RY2	0.359155	0.586207	0.56044	0.56044		0.315534	0.473301	0.460993
TACR1	0.358779	0.626667	0.559524	0.559524		0.308186	0.45933	0.445476
CNKSR3	0.358779	0.594937	0.559524	0.559524		0.333333	0.519565	0.5
SIX6	0.358491	0.59375	0.558824	0.558824		0.312081	0.465	0.453659
FASTK	0.358491	0.567164	0.558824	0.558824		0.353846	0.562691	0.547619
MRGPRD	0.358491	0.575758	0.558824	0.558824		0.376855	0.631841	0.604762
TAS2R38	0.358108	0.576087	0.557895	0.557895		0.26087	0.361446	0.352941
SLC22A14	0.358025	0.58	0.557692	0.557692		0.301775	0.451327	0.432203
NLRC3	0.357827	0.592593	0.557214	0.557214		0.458732	0.899489	0.847512
CYP4F2	0.357798	0.590909	0.557143	0.557143		0.321522	0.497967	0.473888
TGIF2LX	0.357724	0.611111	0.556962	0.556962		0.355769	0.556391	0.552239
CRMP1	0.357664	0.586826	0.556818	0.556818		0.412322	0.711172	0.701613
SLC37A1	0.357143	0.555556	0.555556			0.340909	0.543933	0.517241
DRD2	0.357143	0.560345	0.555556	0.555556		0.413567	0.707865	0.705224
PIGG	0.356808	0.558824	0.554745			0.326818	0.507898	0.485482
OR5M10	0.356643	0.586207	0.554348	0.554348		0.374172	0.642045	0.597884
OR4D9	0.356643	0.554348	0.554348	0.554348		0.379562	0.638037	0.611765
SLC19A3	0.356589	0.575	0.554217	0.554217		0.254062	0.348884	0.340594
OR2T4	0.356589	0.601307	0.554217	0.554217		0.431694	0.778325	0.759615
ZSCAN2	0.356522	0.569444	0.554054	0.554054		0.299871	0.440454	0.428309
TTLL8	0.356522	0.577465	0.554054	0.554054		0.307042	0.459916	0.443089
ARID5A	0.356522	0.602941	0.554054	0.554054		0.340849	0.526639	0.517103
OR52N5	0.356522	0.569444	0.554054	0.554054		0.370079	0.622517	0.5875
KRTAP27-1	0.356436	0.590164	0.553846	0.553846		0.252033	0.356322	0.336957
ZNF224	0.356164	0.597701	0.553191	0.553191		0.297199	0.444444	0.422877
OR10R2	0.356098	0.565891	0.55303	0.55303		0.42	0.754491	0.724138
CHST11	0.356061	0.573171	0.552941	0.552941		0.348259	0.54902	0.534351
SPNS3	0.356061	0.602564	0.552941	0.552941		0.348564	0.558577	0.53507
GDF6	0.356021	0.557377	0.552846	0.552846		0.354276	0.55163	0.548649
MAML2	0.355805	0.59375	0.552326	0.552326		0.311143	0.457934	0.451681
HAPLN3	0.355769	0.552239	0.552239	0.552239		0.307463	0.47907	0.443966
RNF26	0.355769	0.578125	0.552239	0.552239		0.377863	0.622642	0.607362
MSI1	0.355769	0.569231	0.552239	0.552239		0.503571	1.0292	1.01439
OTX2	0.355705	0.616279	0.552083	0.552083		0.324723	0.505747	0.480874
GLT6D1	0.355556	0.585366	0.551724	0.551724		0.289655	0.42	0.407767
C5AR1	0.355556	0.551724	0.551724	0.551724		0.335329	0.523364	0.504505
LGR6	0.355556	0.57971	0.551724			0.339753	0.531325	0.514586
SPINT1	0.355372	0.573333	0.551282			0.303779	0.447537	0.436326
NFE2L1	0.35503	0.606061	0.550459	0.550459		0.535587	1.17578	1.15326
CETN1	0.354545	0.549296	0.549296			0.317073	0.481481	0.464286
CA4	0.354545	0.565217	0.549296			0.320261	0.491639	0.471154
PPP2R2C	0.35443	0.554455	0.54902			0.472036	0.91342	0.894068
FAM181A	0.354331	0.584416	0.54878	0.54878		0.337634	0.521595	0.50974
TFCP2L1	0.354167	0.579545	0.548387			0.362218	0.575758	0.567935
DHRS2	0.353982	0.588235	0.547945	0.547945		0.301318	0.43956	0.431267
SCYL1	0.353741	0.577778	0.547368			0.340289	0.53944	0.515815
OR10G4	0.353659	0.563107	0.54717			0.401734	0.709184	0.671498
FEZF2	0.353659	0.552381	0.54717			0.426716	0.744337	0.744337
TRIM47	0.353448	0.554054	0.546667			0.307403	0.459662	0.443841
CYP2W1	0.353448	0.546667	0.546667			0.343429	0.530936	0.523064
SLC22A1	0.353383	0.566265	0.546512			0.304118	0.456418	0.437026
ISM2	0.353333	0.552083	0.546392			0.303874	0.463956	0.436522
HPN	0.353333	0.552083	0.546392			0.34384	0.546697	0.524017
TMEM104	0.353333	0.56383	0.546392			0.357217	0.57429	0.555735
GCK	0.353261	0.565217	0.546218			0.307475	0.468817	0.443992
SLC7A9	0.353234	0.563492	0.546154			0.330781	0.514286	0.494279
CNTNAP3B	0.352941	0.545455	0.545455			0.273133	0.395161	0.375767
SLC29A2	0.352941	0.580645	0.545455			0.327037	0.510129	0.485965
GHSR	0.352941	0.5625	0.545455			0.360967	0.583799	0.564865
FURIN	0.352941	0.585366	0.545455	0.545455		0.392971	0.653097	0.647368
OR1D2	0.352941	0.5625	0.545455			0.438735	0.828358	0.78169
ST3GAL3	0.352459	0.565789	0.544304			0.326053	0.5	0.483796
SIAH3	0.352381	0.560606	0.544118			0.293478	0.428571	0.415385
CTSA	0.352381	0.560606	0.544118			0.322384	0.483577	0.475763
THAP4	0.352381	0.578125	0.544118			0.377134	0.615758	0.605483
OR9A4	0.352273	0.590476	0.54386	0.54386		0.643979	2.15789	1.80882
NPEPPS	0.352201	0.602151	0.543689	0.543689		0.56381	1.32735	1.29258
CCDC114	0.352113	0.561798	0.543478			0.293362	0.432177	0.415152
PRSS55	0.352	0.571429	0.54321			0.268779	0.384874	0.367576
WNT9B	0.351852	0.584615	0.542857	0.542857		0.32	0.481928	0.470588
CHST7	0.351852	0.567164	0.542857			0.412698	0.716535	0.702703
GIMAP1	0.351759	0.56	0.542636			0.328918	0.501684	0.490132
LRRC18	0.351724	0.56044	0.542553			0.290865	0.423077	0.410169
LIG1	0.351695	0.58042	0.542484			0.369178	0.596239	0.585233
PCDHB6	0.351351	0.565217	0.541667			0.308313	0.46303	0.445741
ACTL7B	0.351351	0.550847	0.541667			0.33437	0.520581	0.502336
SLC22A12	0.351351	0.550847	0.541667			0.345771	0.550495	0.528517
HDAC1	0.351351	0.565217	0.541667			0.405128	0.692982	0.681034
TRPM2	0.351064	0.573913	0.540984			0.332187	0.520188	0.497426
SLC6A19	0.350943	0.560241	0.540698			0.354803	0.581395	0.549915
PFKFB3	0.350877	0.566038	0.540541			0.372521	0.605991	0.593679
SP8	0.350877	0.547945	0.540541			0.417178	0.725333	0.715789
NCBP1	0.350877	0.57971	0.540541			0.537975	1.17241	1.16438
CDK18	0.350746	0.546512	0.54023			0.290936	0.425214	0.410309
ADCY4	0.350598	0.556962	0.539877			0.328797	0.512277	0.489861
FBXO7	0.350427	0.594203	0.539474	0.539474		0.263374	0.366412	0.357542
KCNJ12	0.350365	0.561404	0.539326			0.31951	0.48637	0.469529
CHRNA2	0.35	0.56	0.538462			0.307792	0.460194	0.444653
PRL	0.35	0.59322	0.538462	0.538462		0.309434	0.468571	0.448087
TXNRD2	0.35	0.583333	0.538462			0.338964	0.52807	0.512777
OR1L4	0.35	0.538462	0.538462			0.374126	0.633136	0.597765
GIT1	0.35	0.569767	0.538462			0.393152	0.659406	0.64786
NRBP2	0.35	0.583333	0.538462			0.711066	2.91597	2.46099
SLC39A4	0.34965	0.561798	0.537634			0.374396	0.612648	0.598456
ANKRD33	0.349593	0.589041	0.5375	0.5375		0.314763	0.489177	0.45935
PTCHD4	0.349593	0.558442	0.5375			0.315698	0.472727	0.461343
WDR1	0.349593	0.544304	0.5375			0.397336	0.664193	0.6593
CNNM2	0.349593	0.551282	0.5375			0.46915	0.899554	0.883772
ABI3	0.349515	0.537313	0.537313			0.297794	0.436658	0.424084
OR2C3	0.349515	0.545455	0.537313			0.355245	0.560706	0.550976
OR6B3	0.349515	0.5625	0.537313			0.463068	0.926136	0.862434
SUSD2	0.349345	0.555556	0.536913			0.319653	0.48854	0.469838
LRRC32	0.349282	0.55303	0.536765			0.344865	0.536134	0.526403
SLC16A14	0.349282	0.55303	0.536765			0.357143	0.568182	0.555556
SOX11	0.349206	0.559322	0.536585			0.437282	0.801917	0.77709
DPH2	0.349057	0.552239	0.536232			0.299248	0.448198	0.427039
SYN2	0.349057	0.536232	0.536232			0.318536	0.485748	0.467429
MC2R	0.348993	0.547368	0.536082			0.292105	0.423664	0.412639
SH3BP1	0.348993	0.553191	0.536082			0.344211	0.537829	0.52488
UGT1A5	0.348837	0.555556	0.535714			0.289157	0.421053	0.40678
SYN1	0.348837	0.555556	0.535714			0.367816	0.602637	0.581818
ZNF423	0.348794	0.552941	0.535613			0.314396	0.626374	0.458568
MAP4	0.348718	0.576271	0.535433			0.273533	0.382527	0.376525
PADI4	0.348718	0.544	0.535433			0.286181	0.413522	0.400915
AGT	0.348684	0.576087	0.535354	0.535354		0.349381	0.559471	0.536998
EN1	0.348624	0.550725	0.535211			0.374031	0.605016	0.597523
OR56A3	0.348571	0.554545	0.535088			0.475	1	0.904762
GPR152	0.348485	0.630137	0.534884	0.534884		0.314168	0.484177	0.458084
APBA1	0.348485	0.558252	0.534884			0.372819	0.604167	0.594436
FLRT1	0.348315	0.534483	0.534483			0.362934	0.573171	0.569697
SLC43A1	0.348214	0.541667	0.534247			0.304976	0.450237	0.438799
CPA5	0.348148	0.552941	0.534091			0.324238	0.502488	0.47981
CES5A	0.348066	0.617647	0.533898	0.533898		0.298329	0.451264	0.42517
GALR1	0.347826	0.543689	0.533333			0.283702	0.409884	0.396067
PTGDR	0.347826	0.555556	0.533333			0.303293	0.449871	0.435323
TDRD10	0.347826	0.56338	0.533333			0.318102	0.490515	0.466495
DMRTB1	0.347826	0.55814	0.533333	0.533333		0.345924	0.533742	0.528875
PPP2R5D	0.347826	0.55814	0.533333	0.533333		0.358238	0.568389	0.558209
OR5P3	0.347826	0.56338	0.533333			0.448598	0.852071	0.813559
MRGPRF	0.347826	0.555556	0.533333			0.461353	0.884259	0.856502
LRRC4	0.347561	0.537736	0.53271			0.399225	0.665948	0.664516
OR10A5	0.347518	0.563218	0.532609			0.463333	0.896774	0.863354
SIGLEC11	0.347368	0.564103	0.532258			0.298263	0.443966	0.425034
OR1M1	0.347222	0.543478	0.531915			0.383901	0.642487	0.623116
DNAI1	0.34715	0.563025	0.531746			0.281352	0.40566	0.391502
IL4I1	0.346821	0.545455	0.530973			0.358073	0.577731	0.557809
NFIX	0.346774	0.581081	0.530864	0.530864		0.650568	2.10092	1.86179
PCDHB2	0.346734	0.549801	0.530769			0.310531	0.465587	0.450392
SLC7A14	0.346614	0.557692	0.530488			0.32067	0.483165	0.472039
MGAT5B	0.34657	0.554913	0.530387			0.463626	0.898947	0.864372
TTC24	0.346457	0.578947	0.53012			0.304516	0.458252	0.437848
GHRHR	0.346457	0.55	0.53012			0.323777	0.493573	0.478803
LONP1	0.346341	0.541985	0.529851			0.353055	0.551098	0.545727
PLXND1	0.34633	0.551095	0.529825			0.373766	0.605193	0.596848
IRX6	0.346154	0.567568	0.529412			0.28187	0.408624	0.392505
ASMT	0.346154	0.529412	0.529412			0.288107	0.423645	0.404706
PTPN5	0.346154	0.552632	0.529412			0.342391	0.536932	0.520661
LRRC15	0.345946	0.533333	0.528926			0.329356	0.513966	0.491103
KRI1	0.345912	0.578947	0.528846	0.528846		0.295918	0.433832	0.42029
TMEM151A	0.345912	0.528846	0.528846			0.363104	0.586288	0.570115
GPRC5B	0.345865	0.547619	0.528736			0.340875	0.536817	0.517162
MMP2	0.345833	0.553333	0.528662			0.450599	0.845506	0.820163
LCAT	0.345794	0.536232	0.528571			0.371429	0.610738	0.590909
SEMA5B	0.345771	0.562753	0.528517			0.337105	0.523589	0.508535
ACTRT2	0.345745	0.541667	0.528455			0.34555	0.545455	0.528
LGI2	0.345745	0.565217	0.528455			0.352843	0.57337	0.54522
ST8SIA1	0.345455	0.558824	0.527778			0.350649	0.55102	0.54
MAP2K3	0.345455	0.527778	0.527778			0.353868	0.579812	0.547672
JPH3	0.345455	0.542857	0.527778			0.372816	0.601253	0.594427
SLC13A2	0.345361	0.544715	0.527559			0.345496	0.554945	0.527875
APOA4	0.345324	0.564706	0.527473			0.30622	0.462651	0.441379
KRT81	0.345133	0.557143	0.527027			0.328255	0.511879	0.48866
ADRA2A	0.34507	0.544444	0.526882			0.357372	0.571795	0.55611
OR9G4	0.345029	0.561905	0.526786			0.383178	0.66129	0.621212
TRIM17	0.344828	0.547945	0.526316			0.322009	0.493213	0.474946
LRRC52	0.344828	0.588235	0.526316	0.526316		0.358056	0.583333	0.557769
SLC2A6	0.344828	0.540541	0.526316			0.361917	0.58215	0.567194
ISLR2	0.344828	0.536913	0.526316			0.384537	0.637437	0.624793
OR7G2	0.344828	0.555556	0.526316			0.386364	0.662338	0.62963
OR1A2	0.344828	0.547945	0.526316			0.457364	0.921875	0.842857
MAGEB6	0.34471	0.554945	0.526042			0.324519	0.483871	0.480427
COL23A1	0.344595	0.536842	0.525773			0.342072	0.535156	0.519924
PLIN3	0.344538	0.539474	0.525641			0.349765	0.55597	0.537906
A4GALT	0.344538	0.554054	0.525641			0.355124	0.57265	0.550685
PCDHB7	0.344371	0.554667	0.525253			0.325916	0.504559	0.483495
GFRA3	0.344371	0.571429	0.525253			0.358173	0.57529	0.558052
TYK2	0.344262	0.544041	0.525			0.311604	0.46771	0.452652
CNR1	0.344186	0.582677	0.524823	0.524823		0.443966	0.814229	0.79845
PCDHA13	0.344173	0.540426	0.524793			0.320966	0.49534	0.472681
TAS2R60	0.344156	0.582418	0.524752	0.524752		0.364146	0.607477	0.572687
SNX18	0.344086	0.547009	0.52459			0.390447	0.663139	0.640545
PCDH17	0.344037	0.544465	0.524476			0.358117	0.564516	0.557917
ISM1	0.344	0.5375	0.52439			0.317073	0.476773	0.464286
OR6C1	0.34375	0.555556	0.52381			0.400735	0.698718	0.668712
KCNN1	0.343511	0.529412	0.523256			0.380507	0.623632	0.614224
OR51L1	0.343511	0.54878	0.523256			0.41502	0.755396	0.709459
ANO1	0.343396	0.54491	0.522989			0.35956	0.574324	0.561427
ABCC6	0.343373	0.564356	0.522936			0.304271	0.462207	0.437342
ZP2	0.343348	0.547945	0.522876			0.293567	0.426871	0.415563
SERPINA4	0.343195	0.597938	0.522523	0.522523		0.303318	0.45933	0.435374
GAL3ST1	0.343195	0.542056	0.522523			0.368333	0.589333	0.583113
EPHA8	0.343164	0.547009	0.522449			0.30519	0.45092	0.439243
HOXD12	0.343137	0.564516	0.522388	0.522388		0.29724	0.44164	0.422961
ARMC6	0.343137	0.57377	0.522388			0.301563	0.450935	0.431767
F10	0.343137	0.538462	0.522388			0.332258	0.520202	0.497585
RIMS4	0.343137	0.546875	0.522388			0.440529	0.8	0.787402
PCDHA3	0.343032	0.535885	0.522145			0.339384	0.53021	0.51374
PCDHGB2	0.343023	0.548837	0.522124			0.00287356	0.00288184	0.00288184
TRPV1	0.343023	0.567308	0.522124			0.325596	0.501411	0.48279
SLC9A8	0.342857	0.551724	0.521739			0.344733	0.54902	0.526096
ISYNA1	0.342857	0.537313	0.521739			0.374344	0.617308	0.598322
IGF2BP2	0.342857	0.545455	0.521739			0.375405	0.623656	0.601036
OR7C2	0.342857	0.537313	0.521739	0.521739		0.39759	0.678082	0.66
OR56A4	0.342657	0.538462	0.521277			0.494465	1.00752	0.978102
SLC22A15	0.342593	0.552239	0.521127			0.306548	0.459821	0.44206
SLC7A7	0.342593	0.560606	0.521127			0.319149	0.483871	0.46875
WRAP73	0.342593	0.528571	0.521127			0.347403	0.548718	0.532338
SLC6A1	0.342593	0.564885	0.521127			0.450172	0.847896	0.81875
KCNC3	0.342541	0.548673	0.521008			0.412718	0.722707	0.70276
OR56A1	0.342466	0.537634	0.520833			0.417241	0.75625	0.715976
GAL3ST3	0.342391	0.529412	0.520661			0.317224	0.483019	0.46461
ADRB2	0.342342	0.542857	0.520548			0.358491	0.588235	0.558824
PCDHB3	0.342308	0.544343	0.520468			0.339378	0.526104	0.513725
SLC28A1	0.342246	0.561404	0.520325			0.318487	0.485275	0.467324
LZTS1	0.342246	0.533333	0.520325			0.322699	0.480804	0.476449
TM6SF2	0.342105	0.557143	0.52			0.333333	0.511429	0.5
GPRC5C	0.341935	0.552083	0.519608			0.330779	0.507843	0.494275
RAVER1	0.341935	0.540816	0.519608			0.355953	0.5625	0.552683
CATSPER3	0.34188	0.547945	0.519481			0.284165	0.406832	0.39697
GPR25	0.34188	0.533333	0.519481			0.369352	0.608414	0.58567
TMEM63C	0.341772	0.536424	0.519231			0.350816	0.553309	0.540395
TRIM3	0.341709	0.539683	0.519084			0.412073	0.713636	0.700893
OR2T3	0.341667	0.554054	0.518987			0.364384	0.610092	0.573276
OR1S2	0.341615	0.533981	0.518868			0.378917	0.642512	0.610092
XKR7	0.341463	0.535032	0.518519			0.345061	0.536842	0.52686
UCKL1	0.341463	0.56	0.518519			0.360474	0.586747	0.563657
SLC17A7	0.341317	0.53271	0.518182			0.43739	0.777429	0.777429
CD93	0.341297	0.561798	0.518135	0.518135		0.326962	0.507812	0.4858
KCNJ1	0.34127	0.5375	0.518072			0.244306	0.338109	0.323288
KCNG1	0.341176	0.54375	0.517857			0.469136	0.901695	0.883721
PLD2	0.341121	0.528986	0.51773			0.293881	0.435042	0.416192
OR52H1	0.341085	0.536585	0.517647			0.327068	0.508772	0.486034
PREP	0.341085	0.55	0.517647			0.348675	0.543478	0.535332
OR4D10	0.341085	0.556962	0.517647			0.410909	0.733766	0.697531
CCR2	0.340909	0.54878	0.517241			0.304802	0.453416	0.438438
SLC39A5	0.340909	0.535714	0.517241			0.350259	0.554098	0.539075
ABHD8	0.340909	0.542169	0.517241			0.408551	0.694949	0.690763
IGLL5	0.340836	0.524752	0.517073			0.312593	0.488426	0.454741
PID1	0.340741	0.541176	0.516854			0.300836	0.439024	0.430279
KCNK1	0.340741	0.589744	0.516854	0.516854		0.361751	0.581481	0.566787
OS9	0.34058	0.54023	0.516484			0.293734	0.435203	0.415896
ALDH3B2	0.340426	0.533333	0.516129			0.294788	0.431981	0.418014
TCTN2	0.340426	0.55814	0.516129			0.311083	0.475	0.451554
IL17RA	0.340426	0.537815	0.516129			0.33003	0.501738	0.492605
SIM2	0.340426	0.527473	0.516129			0.339869	0.527919	0.514851
TSHZ1	0.340351	0.530055	0.515957			0.32459	0.484344	0.480583
FAM110B	0.340314	0.52	0.515873			0.359813	0.57037	0.562044
AADACL4	0.340278	0.544444	0.515789			0.239382	0.322917	0.314721
QSOX2	0.340278	0.532609	0.515789			0.312009	0.467227	0.453507
HSPA1L	0.340102	0.544715	0.515385			0.36422	0.590774	0.572872
TSPEAR	0.340081	0.545455	0.515337			0.31183	0.473275	0.453129
GPR148	0.339806	0.522388	0.514706			0.27051	0.391026	0.370821
SLC16A12	0.339806	0.546875	0.514706	0.514706		0.287356	0.409836	0.403226
CPNE2	0.339806	0.522388	0.514706			0.357928	0.574307	0.557457
APCDD1	0.339744	0.524752	0.514563			0.319338	0.481766	0.469159
CPA1	0.339744	0.546392	0.514563			0.321569	0.49848	0.473988
DUSP8	0.339623	0.529412	0.514286			0.413366	0.70913	0.704641
OR7C1	0.339623	0.529412	0.514286	0.514286		0.424242	0.786517	0.736842
POLR3E	0.339506	0.533981	0.514019			0.347098	0.541812	0.531624
OR51T1	0.339506	0.52381	0.514019			0.458472	0.896104	0.846626
PADI3	0.33945	0.536232	0.513889			0.296211	0.432886	0.420881
SLC1A1	0.33945	0.528571	0.513889			0.326991	0.491005	0.485864
PXN	0.33945	0.521127	0.513889			0.335404	0.523256	0.504673
COG8	0.33945	0.552239	0.513889			0.364929	0.591068	0.574627
ACTL7A	0.339286	0.550725	0.513514			0.295533	0.436548	0.419512
PLIN1	0.339286	0.520548	0.513514			0.316085	0.478705	0.462171
DIO3	0.339286	0.535211	0.513514			0.400524	0.676991	0.668122
VSIG10	0.33913	0.565217	0.513158			0.319588	0.502315	0.469697
OR7G3	0.33913	0.513158	0.513158			0.470817	0.945312	0.889706
COL18A1	0.339024	0.530534	0.512915			0.365038	0.584519	0.574897
PCDHGB4	0.338936	0.535398	0.512712			0.00149925	0.0015015	0.0015015
GLP1R	0.338798	0.548673	0.512397			0.367816	0.597333	0.581818
MC3R	0.33871	0.516393	0.512195			0.282222	0.405751	0.393189
MPP3	0.33871	0.56	0.512195			0.428346	0.821752	0.749311
TAS1R1	0.338624	0.537815	0.512			0.285897	0.414884	0.400359
ZNF598	0.338624	0.516129	0.512			0.363346	0.57884	0.570712
OR6C70	0.338583	0.530864	0.511905			0.387681	0.685897	0.633136
KCNA3	0.338583	0.551282	0.511905			0.396581	0.668588	0.657224
ZNF786	0.338542	0.541667	0.511811			0.292605	0.42874	0.413636
TM9SF4	0.338542	0.53719	0.511811			0.379747	0.621302	0.612245
SLC19A1	0.338346	0.511364	0.511364			0.343803	0.542169	0.523933
TTYH2	0.338235	0.522727	0.511111			0.326503	0.492784	0.484787
RBM47	0.338235	0.516854	0.511111			0.385942	0.632609	0.62851
RHCG	0.338129	0.546512	0.51087			0.309244	0.462312	0.447689
CACNA1S	0.338118	0.538071	0.510843			0.292863	0.453453	0.414152
LRRC4B	0.337989	0.521552	0.510549			0.454315	0.840376	0.832558
THNSL2	0.337931	0.521277	0.510417			0.313754	0.476087	0.457203
SLC27A4	0.337931	0.526882	0.510417			0.326291	0.493783	0.484321
HIPK4	0.337838	0.531915	0.510204			0.336352	0.523139	0.506823
KIF25	0.337748	0.573034	0.51	0.51		0.311234	0.469444	0.451872
TBCD	0.337748	0.525773	0.51			0.354707	0.572267	0.549683
GPRIN2	0.337662	0.525253	0.509804			0.287063	0.413605	0.402649
SLC35F4	0.337662	0.541667	0.509804			0.295875	0.431535	0.420202
GPR142	0.33758	0.519608	0.509615			0.273517	0.388889	0.376494
CBX4	0.33758	0.524752	0.509615			0.366758	0.584245	0.579176
RELB	0.3375	0.519231	0.509434			0.408791	0.700565	0.69145
CHRNA4	0.337449	0.515723	0.509317			0.364641	0.591045	0.573913
ADD1	0.337209	0.537037	0.508772			0.289791	0.413146	0.408037
VIPR2	0.337143	0.546296	0.508621			0.328844	0.513135	0.489967
ELFN1	0.337017	0.516949	0.508333			0.376835	0.609499	0.604712
MTNR1B	0.336842	0.537815	0.507937			0.563934	1.45763	1.29323
EHMT1	0.33677	0.524064	0.507772			0.358857	0.57623	0.559713
CYP4B1	0.336735	0.545455	0.507692			0.281163	0.406	0.391137
GGTLC1	0.336634	0.53125	0.507463			0.282555	0.410714	0.393836
SCRN2	0.336634	0.53125	0.507463			0.282934	0.412664	0.394572
ZSCAN21	0.336634	0.53125	0.507463			0.30674	0.471459	0.44246
FOXA3	0.336634	0.507463	0.507463			0.341317	0.519757	0.518182
BTBD2	0.336634	0.53125	0.507463			0.421671	0.734091	0.72912
BDKRB1	0.336538	0.564516	0.507246	0.507246		0.317568	0.484536	0.465347
INPP5E	0.336538	0.514706	0.507246			0.331942	0.507177	0.496875
OR1J4	0.336538	0.538462	0.507246			0.424779	0.774194	0.738462
TPRX1	0.336449	0.529412	0.507042			0.293564	0.427918	0.415556
POM121L12	0.336384	0.525	0.506897			0.310345	0.464373	0.45
OR2L13	0.336364	0.524823	0.506849			0.431065	0.817881	0.757669
NPEPL1	0.336364	0.528571	0.506849			0.504367	1.08451	1.01762
SLC36A3	0.336283	0.513514	0.506667			0.285298	0.416136	0.399185
TIMM44	0.336283	0.542857	0.506667			0.34143	0.529289	0.518443
OR5M1	0.336283	0.506667	0.506667			0.400641	0.702247	0.668449
F2R	0.336207	0.52	0.506494			0.310513	0.466912	0.450355
GPR132	0.336207	0.52	0.506494			0.355408	0.568905	0.55137
OR10A2	0.336207	0.513158	0.506494			0.416031	0.746575	0.712418
ZNF362	0.336207	0.52	0.506494			0.429594	0.762712	0.753138
HCAR2	0.336066	0.525641	0.506173			0.285714	0.410959	0.4
HEY2	0.336066	0.525641	0.506173			0.319565	0.472669	0.469649
WDR20	0.336066	0.569444	0.506173	0.506173		0.353418	0.554545	0.546595
OR8B2	0.336	0.525	0.506024			0.400729	0.709677	0.668693
MOGAT3	0.336	0.518519	0.506024			0.40625	0.747126	0.684211
ACRBP	0.335938	0.581081	0.505882	0.505882		0.295752	0.444717	0.419954
ZNF777	0.335907	0.533742	0.505814			0.413155	0.707746	0.704028
G6PD	0.335714	0.51087	0.505376			0.376486	0.612903	0.603814
DRD5	0.335689	0.508021	0.505319			0.322013	0.48855	0.474954
SLC11A1	0.335664	0.510638	0.505263			0.339004	0.53861	0.512868
ZNF682	0.33557	0.549451	0.505051			0.266551	0.387342	0.36342
ZNF710	0.33557	0.526316	0.505051			0.357724	0.564103	0.556962
OR4K17	0.335484	0.514851	0.504854			0.365696	0.601064	0.576531
OR2T2	0.335484	0.536082	0.504854			0.403263	0.694779	0.675781
KRT38	0.335443	0.535354	0.504762			0.290801	0.429825	0.410042
HLCS	0.335443	0.552083	0.504762			0.311111	0.47076	0.451613
KRT37	0.335404	0.529412	0.504673			0.292187	0.43287	0.412804
OR8B8	0.335404	0.534653	0.504673			0.420849	0.751724	0.726667
EPHB2	0.335277	0.513393	0.504386			0.354063	0.557441	0.548139
FGD3	0.335079	0.52459	0.503937			0.3391	0.525939	0.513089
PCDHA6	0.33506	0.510526	0.503896			0.342593	0.53753	0.521127
PSG3	0.334951	0.511111	0.50365			0.258696	0.368992	0.348974
NR4A2	0.334951	0.534884	0.50365			0.555556	1.28342	1.25
PODN	0.334928	0.530303	0.503597			0.33557	0.52356	0.505051
OR8I2	0.334746	0.541096	0.503185			0.386228	0.664948	0.629268
MYO1H	0.334746	0.544828	0.503185			0.555944	1.5665	1.25197
OTUD7A	0.334728	0.519481	0.503145			0.40139	0.678414	0.670537
MAML3	0.334677	0.535484	0.50303			0.324607	0.485217	0.48062
FZD10	0.334559	0.514124	0.502762			0.300781	0.441683	0.430168
PCDHB13	0.334302	0.518018	0.502183			0.34	0.533816	0.515152
TGM6	0.333333	0.53012	0.5			0.282888	0.411511	0.394483
HTR1D	0.333333	0.553846	0.5			0.289474	0.421725	0.407407
MC5R	0.333333	0.5	0.5			0.30254	0.447099	0.433775
GPR32	0.333333	0.508929	0.5			0.303983	0.457413	0.436747
DENND1C	0.333333	0.534653	0.5			0.304032	0.447743	0.436848
SLC7A8	0.333333	0.538462	0.5			0.307798	0.462012	0.444664
UTS2R	0.333333	0.506667	0.5			0.324047	0.497748	0.479393
VDR	0.333333	0.522388	0.5			0.324159	0.494172	0.479638
KPNA7	0.333333	0.53125	0.5			0.327755	0.517621	0.487552
RIN3	0.333333	0.507937	0.5			0.33006	0.505787	0.492672
ARHGEF33	0.333333	0.518519	0.5			0.331476	0.504237	0.495833
WFS1	0.333333	0.507246	0.5			0.333645	0.52388	0.500702
TRIM35	0.333333	0.547945	0.5			0.342424	0.538951	0.520737
AQP8	0.333333	0.507042	0.5			0.345277	0.540816	0.527363
OR4A5	0.333333	0.522727	0.5			0.34767	0.555874	0.532967
ST8SIA3	0.333333	0.516393	0.5			0.352459	0.558442	0.544304
PRELP	0.333333	0.518987	0.5			0.353201	0.567376	0.546075
LETM1	0.333333	0.51087	0.5			0.362069	0.575868	0.567568
OR51A7	0.333333	0.513761	0.5			0.363636	0.636943	0.571429
GLUD1	0.333333	0.520548	0.5			0.383481	0.631068	0.62201
TFAP2C	0.333333	0.52439	0.5			0.384946	0.637011	0.625874
TP73	0.333333	0.564356	0.5			0.390969	0.658627	0.641953
PHF2	0.333333	0.509434	0.5			0.396293	0.664201	0.656433
PRKCG	0.333333	0.522843	0.5			0.403769	0.688073	0.677201
SLC7A1	0.333333	0.51	0.5			0.434251	0.78022	0.767568
OR10Z1	0.333333	0.539062	0.5			0.438944	0.810976	0.782353
POU4F1	0.333333	0.5	0.5			0.459627	0.857143	0.850575
CELF5	0.333333	0.514706	0.5			0.479121	0.92766	0.919831
SALL3	0.332773	0.508997	0.498741			0.369729	0.594151	0.58662
ABCC10	0.332308	0.519231	0.497696			0.317241	0.48234	0.464646
LILRA2	0.332	0.522013	0.497006			0.304264	0.459736	0.437326
TLR5	0.331933	0.523179	0.496855			0.271224	0.3936	0.372163
ANO7	0.331933	0.509677	0.496855			0.334469	0.538884	0.50256
IGDCC3	0.331878	0.539007	0.496732			0.328804	0.501381	0.489879
NOD1	0.331878	0.520548	0.496732			0.465465	0.94898	0.870787
SLC6A17	0.331797	0.529412	0.496552			0.365854	0.587629	0.576923
MAP4K1	0.331797	0.533333	0.496552			0.374486	0.611765	0.598684
SEMA4D	0.331551	0.54386	0.496			0.323792	0.487214	0.478836
FZD8	0.331492	0.504202	0.495868			0.463329	0.878587	0.863341
DAGLA	0.331476	0.504237	0.495833			0.40991	0.703246	0.694656
BMP7	0.331461	0.495798	0.495798			0.365506	0.589286	0.57606
ABCB8	0.331429	0.522523	0.495726			0.302686	0.448698	0.434074
PLVAP	0.331429	0.504348	0.495726			0.322064	0.491848	0.475066
PHACTR1	0.331395	0.518182	0.495652			0.365722	0.587852	0.576596
RTN2	0.331325	0.539216	0.495495			0.301548	0.444712	0.431739
LRRC8E	0.331325	0.533981	0.495495			0.32878	0.504895	0.489824
NCAM1	0.331307	0.539604	0.495455			0.72449	2.84	2.62963
INTS1	0.331237	0.519737	0.495298			0.38547	0.643367	0.62726
CPNE5	0.33121	0.514851	0.495238			0.373494	0.62	0.596154
FIBCD1	0.331169	0.51	0.495146			0.330056	0.515351	0.492662
ADCY3	0.330986	0.52514	0.494737			0.308993	0.457457	0.447162
RAB11FIP5	0.330986	0.52809	0.494737			0.327586	0.5	0.487179
TRIM71	0.330986	0.531073	0.494737			0.42446	0.743697	0.7375
SLC45A3	0.330882	0.5	0.494505			0.345794	0.542787	0.528571
OR1A1	0.330882	0.505618	0.494505			0.469697	0.928144	0.885714
XKR3	0.330827	0.53012	0.494382			0.275463	0.397993	0.380192
PHACTR3	0.330798	0.520958	0.494318			0.355126	0.555814	0.550691
PDILT	0.330769	0.52439	0.494253			0.291123	0.426386	0.410681
AMZ1	0.330769	0.52439	0.494253			0.334884	0.522083	0.503497
PGS1	0.330769	0.518072	0.494253			0.347236	0.557632	0.531947
ATCAY	0.330769	0.505882	0.494253			0.377528	0.619926	0.606498
OR8A1	0.330769	0.494253	0.494253			0.423529	0.765957	0.734694
ELAVL3	0.330769	0.505882	0.494253			0.439614	0.798246	0.784483
AVPR1B	0.330709	0.518519	0.494118			0.291737	0.426108	0.411905
DLK1	0.330709	0.518519	0.494118			0.332714	0.508523	0.498607
GPAA1	0.330709	0.506024	0.494118			0.346863	0.554028	0.531073
MAS1	0.330579	0.519481	0.493827			0.308271	0.462406	0.445652
CACNG4	0.330579	0.506329	0.493827			0.394521	0.669767	0.651584
CLDN17	0.330508	0.527027	0.493671			0.282051	0.411765	0.392857
ZNF497	0.330435	0.527778	0.493506			0.320329	0.490566	0.471299
ZNF213	0.330435	0.506667	0.493506			0.321678	0.502183	0.474227
PAG1	0.330357	0.552239	0.493333			0.334792	0.522184	0.503289
MGAT3	0.330317	0.514085	0.493243			0.54059	1.21074	1.17671
ZNF30	0.330275	0.521739	0.493151			0.24487	0.336466	0.324275
RRNAD1	0.330275	0.537313	0.493151			0.284247	0.406863	0.397129
CBX2	0.330275	0.521739	0.493151			0.342676	0.52933	0.52132
TM9SF1	0.330275	0.521739	0.493151			0.369483	0.602881	0.586
RASD2	0.330275	0.5	0.493151			0.370031	0.596059	0.587379
NTSR2	0.330275	0.514286	0.493151			0.507317	1.10053	1.0297
NPTN	0.330275	0.521739	0.493151			0.515432	1.06369	1.06369
LMCD1	0.330189	0.514706	0.492958			0.279379	0.397476	0.387692
WDFY1	0.330189	0.514706	0.492958			0.309091	0.461017	0.447368
EPDR1	0.330097	0.507463	0.492754			0.31044	0.480851	0.450199
SLC16A5	0.330097	0.53125	0.492754			0.323843	0.505556	0.478947
CLVS1	0.330097	0.523077	0.492754			0.35277	0.557604	0.545045
ZNF335	0.330033	0.512821	0.492611			0.317433	0.47737	0.465058
AMBP	0.33	0.52381	0.492537			0.275556	0.396166	0.380368
GPT2	0.33	0.507692	0.492537			0.358696	0.580645	0.559322
GJA4	0.33	0.515625	0.492537			0.361905	0.580153	0.567164
APLNR	0.33	0.507692	0.492537			0.367113	0.585366	0.58006
OLFML3	0.33	0.515625	0.492537			0.386707	0.688172	0.630542
FBXL7	0.329815	0.502008	0.492126			0.377504	0.617128	0.606436
CDH11	0.329718	0.504983	0.491909			0.333673	0.503852	0.500766
NR0B1	0.329609	0.526786	0.491667			0.502778	1.19868	1.01117
CYP4F8	0.32948	0.504425	0.491379			0.311429	0.471861	0.452282
KSR2	0.329365	0.510769	0.491124			0.360122	0.565495	0.562798
RTEL1	0.329218	0.516129	0.490798			0.347713	0.544237	0.533067
KCNK9	0.329218	0.506329	0.490798			0.432099	0.774908	0.76087
PAK4	0.329193	0.519608	0.490741			0.329143	0.506151	0.49063
MOV10L1	0.329193	0.514563	0.490741			0.401646	0.715543	0.671252
ECE2	0.32906	0.513333	0.490446			0.309109	0.470501	0.447405
RBMXL2	0.329004	0.503311	0.490323			0.301255	0.436364	0.431138
KATNB1	0.328859	0.510417	0.49			0.359413	0.573099	0.561069
OR10A4	0.328859	0.5	0.49			0.392027	0.678161	0.644809
OR51D1	0.328859	0.510417	0.49			0.414557	0.744318	0.708108
PTCHD3	0.328729	0.51073	0.489712			0.31346	0.478621	0.456579
FAF1	0.328671	0.54023	0.489583			0.306452	0.451187	0.44186
GPSM1	0.328571	0.528736	0.489362			0.33	0.507042	0.492537
NKX2-2	0.328571	0.505495	0.489362			0.533784	1.17037	1.14493
SLC2A10	0.328502	0.511278	0.489209			0.316397	0.47986	0.462838
CTSG	0.328467	0.5625	0.48913			0.322884	0.497585	0.476852
GMIP	0.328467	0.502793	0.48913			0.336232	0.523702	0.50655
SLC32A1	0.328358	0.502857	0.488889			0.417939	0.720395	0.718033
TSGA10IP	0.328244	0.5375	0.488636			0.290049	0.437729	0.408547
SLC16A9	0.328244	0.511905	0.488636			0.30102	0.440299	0.430657
OR9G1	0.328244	0.551282	0.488636			0.398	0.695804	0.66113
SCN4A	0.328231	0.502604	0.488608			0.283819	0.474723	0.396294
GTF3C3	0.328205	0.528926	0.48855			0.274216	0.394118	0.37782
EPS8L3	0.328125	0.516393	0.488372			0.302177	0.451243	0.433028
TAS2R41	0.328125	0.56	0.488372			0.315202	0.478814	0.460285
CHPF	0.328125	0.520661	0.488372			0.359589	0.576923	0.561497
PAOX	0.328	0.506173	0.488095			0.325524	0.507692	0.482633
OR10W1	0.328	0.493976	0.488095			0.421429	0.75641	0.728395
CACNA1C	0.327963	0.528757	0.488014			0.369739	0.728581	0.586645
PROKR1	0.327869	0.495868	0.487805			0.276596	0.392857	0.382353
SLC36A1	0.327869	0.506329	0.487805			0.322239	0.490783	0.475446
ILVBL	0.327869	0.519481	0.487805			0.340557	0.533981	0.516432
SLC4A11	0.327869	0.516129	0.487805			0.353306	0.564356	0.546326
SLC6A3	0.327759	0.518519	0.487562			0.4329	0.775194	0.763359
C1QTNF2	0.327731	0.506494	0.4875			0.294695	0.42735	0.417827
CD4	0.327731	0.493671	0.4875			0.33209	0.507123	0.497207
ANKRD34C	0.327731	0.549296	0.4875			0.333333	0.507692	0.5
ITGAX	0.327473	0.505085	0.486928			0.321716	0.489796	0.474308
PLA2G4D	0.327434	0.493333	0.486842			0.291971	0.42838	0.412371
PTGER4	0.327434	0.513889	0.486842			0.313449	0.467638	0.456556
ITGA3	0.327434	0.513889	0.486842			0.33277	0.511688	0.498734
PDIA2	0.327434	0.493333	0.486842			0.346154	0.545208	0.529412
DCAF12L1	0.327434	0.506849	0.486842			0.430025	0.754464	0.754464
TECTA	0.327316	0.513208	0.486583			0.310035	0.467059	0.449349
OR51A4	0.327273	0.5	0.486486			0.369775	0.605263	0.586735
WIPI2	0.327273	0.521739	0.486486			0.410745	0.707463	0.697059
DDX39A	0.327273	0.514286	0.486486			0.438384	0.789091	0.780576
PREB	0.327103	0.492958	0.486111			0.313099	0.47343	0.455814
SNRNP200	0.327103	0.512821	0.486111			0.420861	0.733615	0.726702
NR5A1	0.327103	0.5	0.486111			0.572178	1.38854	1.33742
PROKR2	0.327068	0.50289	0.486034			0.309942	0.463557	0.449153
FPR3	0.327044	0.495238	0.485981			0.269592	0.373913	0.369099
SLC12A8	0.327044	0.514851	0.485981			0.303797	0.457143	0.436364
KRT7	0.326923	0.53125	0.485714			0.287671	0.415842	0.403846
FAM71E2	0.326923	0.5	0.485714			0.303876	0.451613	0.436526
OR2F2	0.326923	0.5	0.485714			0.366906	0.618182	0.579545
OR52M1	0.326923	0.5	0.485714			0.420048	0.768559	0.72428
OR5D18	0.326923	0.502959	0.485714			0.423358	0.773333	0.734177
NLRP12	0.32684	0.505017	0.485531			0.402044	0.7375	0.672365
NEFH	0.326772	0.5	0.48538			0.668122	2.44149	2.01316
PCDHGB3	0.326683	0.5	0.485185			0.288107	0.41697	0.404706
KRT24	0.326667	0.5	0.485149			0.273381	0.392562	0.376238
SLC27A5	0.326531	0.496124	0.484848			0.283898	0.414219	0.39645
OR8D2	0.326531	0.494845	0.484848			0.415584	0.744186	0.711111
CRTAC1	0.326446	0.519737	0.484663			0.329085	0.497732	0.490503
CCNF	0.326425	0.504	0.484615			0.329281	0.503876	0.490937
BAIAP2L1	0.326389	0.52809	0.484536			0.30312	0.443961	0.434968
SLC6A7	0.326389	0.505376	0.484536			0.331901	0.513289	0.496785
OR9Q2	0.326241	0.511111	0.484211			0.30273	0.455224	0.434164
ALOX15	0.326241	0.511111	0.484211			0.324053	0.506969	0.479407
NR4A1	0.326241	0.489362	0.484211			0.538012	1.24324	1.16456
KCNA6	0.326165	0.502762	0.484043			0.395393	0.67101	0.653968
MRGPRX3	0.326087	0.494505	0.483871			0.361949	0.604651	0.567273
MAGEA12	0.326087	0.517241	0.483871			0.414966	0.717647	0.709302
KNDC1	0.326	0.504644	0.48368			0.332081	0.509804	0.497188
OR4F6	0.325926	0.488889	0.483516			0.368821	0.62987	0.584337
KCNS2	0.325893	0.493243	0.483444			0.346	0.54232	0.529052
KCNJ4	0.325893	0.496599	0.483444			0.485646	0.962085	0.944186
TMC6	0.325843	0.517857	0.483333			0.332792	0.515075	0.498783
ZNF324	0.325758	0.5	0.483146			0.40264	0.698473	0.674033
PLEKHG6	0.325714	0.537736	0.483051			0.310193	0.47004	0.449682
PCDHA7	0.32567	0.497076	0.482955			0.332813	0.513872	0.498829
ADRA1A	0.325581	0.504505	0.482759			0.300474	0.449008	0.429539
SRMS	0.325581	0.506024	0.482759			0.302177	0.452107	0.433028
MCAM	0.325581	0.494118	0.482759			0.337855	0.523901	0.510242
SLC17A2	0.325581	0.528302	0.482759			0.348928	0.568254	0.535928
PCDHA12	0.325549	0.491701	0.482688			0.301853	0.45	0.432364
PCDHA8	0.325503	0.501292	0.482587			0.31307	0.473563	0.455752
ENGASE	0.325444	0.5	0.482456			0.306667	0.466847	0.442308
FAM155B	0.325397	0.506173	0.482353			0.339921	0.516517	0.51497
EBF3	0.325397	0.515723	0.482353			0.410138	0.719677	0.695312
KCNG2	0.325359	0.503704	0.48227			0.38825	0.652361	0.634656
ANTXR1	0.325301	0.514286	0.482143			0.361393	0.576389	0.565909
TPP1	0.325203	0.519481	0.481928			0.287617	0.421875	0.403738
POU3F3	0.325203	0.493827	0.481928			0.498221	1.01449	0.992908
BMP6	0.325153	0.495327	0.481818			0.334672	0.507099	0.503018
ZNF496	0.325123	0.492537	0.481752			0.341822	0.525674	0.519347
SLC34A1	0.325	0.495238	0.481481			0.300344	0.446863	0.429274
TRIM21	0.325	0.52	0.481481			0.313015	0.481013	0.455635
FSD1	0.325	0.504854	0.481481			0.357252	0.563855	0.555819
OR5M11	0.325	0.481481	0.481481			0.419244	0.7625	0.721893
CPNE7	0.324841	0.50495	0.481132			0.3488	0.558974	0.535627
EHD2	0.324841	0.520408	0.481132			0.364372	0.59081	0.573248
HSPD1	0.324841	0.53125	0.481132			0.401099	0.671779	0.669725
ZNF425	0.324818	0.514451	0.481081			0.319328	0.495922	0.469136
PUS1	0.324786	0.493506	0.481013			0.321689	0.488938	0.474249
WFIKKN1	0.324786	0.527778	0.481013			0.347643	0.551402	0.532903
FOXL1	0.324786	0.487179	0.481013			0.35	0.544669	0.538462
COLEC11	0.324786	0.506667	0.481013			0.379056	0.619277	0.610451
OR4D6	0.324675	0.49505	0.480769			0.384892	0.664596	0.625731
TMEM26	0.324561	0.528571	0.480519			0.289689	0.427536	0.407834
APCS	0.324561	0.528571	0.480519			0.312693	0.487923	0.454955
GPNMB	0.324503	0.494949	0.480392			0.293883	0.441118	0.416196
STX11	0.324503	0.510417	0.480392			0.303534	0.447853	0.435821
SLC13A3	0.324444	0.528986	0.480263			0.37414	0.612613	0.597802
THBS2	0.324385	0.514184	0.480132			0.361763	0.573844	0.566815
DHX33	0.324324	0.521739	0.48			0.292096	0.427852	0.412621
SH2B2	0.324324	0.521739	0.48			0.318075	0.478799	0.466437
ESRRB	0.324324	0.5	0.48			0.324111	0.49697	0.479532
ALPI	0.324324	0.517241	0.48			0.332911	0.52495	0.499051
PCK1	0.324324	0.494118	0.48			0.364198	0.592965	0.572816
IQSEC1	0.324219	0.506098	0.479769			0.343688	0.532242	0.523666
ITGB2	0.324111	0.503067	0.479532			0.385885	0.656786	0.628358
TMEM143	0.324074	0.507246	0.479452			0.338235	0.535922	0.511111
OR13H1	0.324074	0.530303	0.479452			0.385027	0.679245	0.626087
YY2	0.324074	0.486111	0.479452			0.39527	0.657303	0.653631
MGAT4B	0.324074	0.514706	0.479452			0.475921	0.946479	0.908108
COL20A1	0.324051	0.490421	0.479401			0.332314	0.521948	0.497711
DHX35	0.324022	0.508772	0.479339			0.287897	0.429072	0.40429
ATP2B2	0.324	0.489426	0.47929			0.45743	0.849138	0.843081
TRIM49B	0.323944	0.489362	0.479167			0.284281	0.41769	0.397196
PCDHB5	0.323917	0.498551	0.479109			0.340289	0.531995	0.515815
ASB2	0.323864	0.495652	0.478992			0.320248	0.492846	0.471125
ABCA2	0.323864	0.492795	0.478992			0.403037	0.684864	0.675147
S1PR1	0.323864	0.522936	0.478992			0.420613	0.736585	0.725962
ELMOD1	0.32381	0.507463	0.478873			0.26087	0.363636	0.352941
FRZB	0.32381	0.507463	0.478873			0.304124	0.455598	0.437037
SPATC1	0.323741	0.478723	0.478723			0.303648	0.452077	0.436055
RHOT2	0.323741	0.494505	0.478723			0.348594	0.554054	0.535141
BEST2	0.323741	0.517241	0.478723			0.359084	0.587822	0.560268
GLIS1	0.323671	0.492647	0.478571			0.329044	0.499303	0.490411
VWA2	0.323671	0.51145	0.478571			0.554358	1.34716	1.24395
TSHZ3	0.323643	0.495549	0.47851			0.343994	0.528777	0.524376
FANK1	0.323529	0.515625	0.478261			0.262921	0.376206	0.356707
PYROXD2	0.323529	0.52381	0.478261			0.308894	0.463063	0.446957
OR4A47	0.323529	0.495495	0.478261			0.349633	0.569721	0.537594
BRD3	0.323383	0.5	0.477941			0.425059	0.748454	0.739308
SLC6A9	0.323353	0.504673	0.477876			0.353648	0.565934	0.547145
XCR1	0.323308	0.494253	0.477778			0.335038	0.521912	0.503846
ATP1A3	0.323263	0.493088	0.477679			0.484305	0.949451	0.93913
FARP1	0.323232	0.5	0.477612			0.323141	0.487933	0.477413
VPS16	0.323232	0.492308	0.477612			0.325186	0.492754	0.48189
WDR91	0.323171	0.514563	0.477477			0.339795	0.528369	0.51468
OR2Z1	0.323171	0.490741	0.477477			0.568182	1.54321	1.31579
SLC9A2	0.323129	0.521978	0.477387			0.356635	0.574427	0.554328
ZBTB39	0.323077	0.506024	0.477273			0.283654	0.405498	0.395973
ZNF34	0.323077	0.525	0.477273			0.324373	0.494536	0.480106
DNAJC11	0.323077	0.552632	0.477273			0.350877	0.554156	0.540541
OR1L8	0.323077	0.488372	0.477273			0.442446	0.82	0.793548
PCDHA5	0.323017	0.491176	0.477143			0.331081	0.509753	0.494949
KRT18	0.322981	0.509804	0.477064			0.368715	0.589286	0.584071
HTR1E	0.322917	0.504065	0.476923			0.3531	0.559829	0.545833
OR5T1	0.322917	0.496	0.476923			0.393082	0.702247	0.647668
HTR6	0.322835	0.482353	0.476744			0.360534	0.578571	0.563805
FDXACB1	0.322581	0.547945	0.47619			0.276873	0.398438	0.382883
ABCC8	0.322581	0.5	0.47619			0.34643	0.549392	0.530059
PANX2	0.322581	0.491803	0.47619			0.412141	0.723364	0.701087
MEX3C	0.322581	0.512821	0.47619			0.539806	1.18803	1.173
GRK7	0.322222	0.487395	0.47541			0.291667	0.423767	0.411765
WDR88	0.322148	0.505263	0.475248			0.303351	0.461126	0.435443
DLG3	0.322148	0.527473	0.475248			0.378981	0.62963	0.610256
PCDHA1	0.322034	0.488432	0.475			0.332229	0.510828	0.497519
MOCS3	0.322034	0.506667	0.475			0.342857	0.549199	0.521739
PTCHD1	0.322034	0.493506	0.475			0.381113	0.627778	0.615804
OR1Q1	0.322034	0.513514	0.475			0.459677	0.897638	0.850746
SLC4A3	0.321937	0.509009	0.47479			0.345546	0.542659	0.527992
SLC2A9	0.321918	0.479592	0.474747			0.315663	0.482801	0.461268
USP20	0.321888	0.503356	0.474684			0.335601	0.519906	0.505119
PCDHA4	0.321799	0.484375	0.47449			0.334138	0.52267	0.501814
ZIC1	0.321767	0.502463	0.474419			0.47646	0.930147	0.910072
TGFB1I1	0.321739	0.493333	0.474359			0.316547	0.475676	0.463158
NUP85	0.321739	0.506849	0.474359			0.40376	0.683333	0.677177
GPR39	0.321637	0.495495	0.474138			0.30411	0.450609	0.437008
FAM124A	0.321429	0.504673	0.473684			0.293725	0.434783	0.415879
HS1BP3	0.321429	0.493151	0.473684			0.302395	0.447894	0.433476
KIF17	0.321429	0.495763	0.473684			0.315527	0.479437	0.460978
DLX5	0.321429	0.514286	0.473684			0.318681	0.479339	0.467742
CEACAM16	0.321429	0.5	0.473684			0.330769	0.509479	0.494253
PIGT	0.321429	0.521739	0.473684			0.337871	0.531128	0.51028
SLC17A1	0.321429	0.505618	0.473684			0.33913	0.532787	0.513158
RAP1GAP2	0.321429	0.5	0.473684			0.355249	0.561139	0.550987
SLCO3A1	0.321429	0.496552	0.473684			0.426829	0.76087	0.744681
GABRA5	0.321429	0.491803	0.473684			0.429844	0.762846	0.753906
DNAAF1	0.321212	0.486239	0.473214			0.270306	0.383381	0.370438
TPCN2	0.321212	0.486239	0.473214			0.330348	0.509202	0.493314
IDS	0.321168	0.505747	0.473118			0.314741	0.478788	0.459302
ANKMY1	0.321138	0.512987	0.473054			0.301595	0.450484	0.431834
MATN4	0.321138	0.509677	0.473054			0.306761	0.45441	0.442504
SCLY	0.321101	0.486111	0.472973			0.277966	0.398058	0.384977
HDGFL1	0.321101	0.5	0.472973			0.339713	0.527881	0.514493
SLC2A4	0.321101	0.492958	0.472973			0.339775	0.531486	0.514634
CYP7A1	0.321053	0.491935	0.472868			0.258803	0.362963	0.349169
TRPC7	0.321016	0.480969	0.472789			0.337983	0.527638	0.510535
MAP3K10	0.320988	0.493671	0.472727			0.361545	0.575916	0.566281
FZD1	0.32093	0.489362	0.472603			0.397375	0.672727	0.659406
TOP1MT	0.320896	0.494253	0.472527			0.298929	0.450808	0.426389
SYT11	0.320896	0.505882	0.472527			0.315663	0.466192	0.461268
HOXA3	0.320755	0.485714	0.472222			0.320528	0.485896	0.471731
DRD3	0.320755	0.520408	0.472222			0.328736	0.503521	0.489726
ARHGEF18	0.320755	0.489209	0.472222			0.338042	0.523774	0.51067
ZFYVE1	0.320755	0.525773	0.472222			0.369973	0.593548	0.587234
KRT73	0.320675	0.506667	0.47205			0.288227	0.420949	0.404943
TCOF1	0.320675	0.503311	0.47205			0.306573	0.448385	0.442113
UBN1	0.320675	0.493506	0.47205			0.325213	0.489011	0.481949
EYA2	0.320675	0.487179	0.47205			0.331158	0.5075	0.495122
SMPD4	0.320652	0.483607	0.472			0.385338	0.65565	0.626911
CPNE1	0.320611	0.488372	0.47191			0.275157	0.393258	0.37961
AACS	0.320611	0.506024	0.47191			0.293044	0.428333	0.414516
TMEM145	0.320611	0.518519	0.47191			0.328932	0.502752	0.490161
ROR2	0.320611	0.488372	0.47191			0.342566	0.54023	0.521064
SEC14L5	0.320574	0.492647	0.471831			0.316042	0.485294	0.462077
DPP9	0.320574	0.507576	0.471831			0.382327	0.636099	0.61898
ABCG5	0.320513	0.49505	0.471698			0.297693	0.435033	0.423878
ZBED1	0.320513	0.483871	0.471698			0.382151	0.62782	0.618519
NRXN2	0.320442	0.48468	0.471545			0.587681	1.4639	1.42531
RASSF6	0.320388	0.5	0.471429			0.245747	0.339426	0.325815
C16orf46	0.320388	0.5	0.471429			0.267581	0.379562	0.36534
DENND2D	0.320388	0.485294	0.471429			0.313196	0.473558	0.456019
GHDC	0.320388	0.5	0.471429			0.315007	0.480726	0.45987
ZBTB7C	0.320388	0.485294	0.471429			0.318024	0.47416	0.466328
ASPRV1	0.320388	0.52381	0.471429			0.335586	0.519164	0.505085
TPST2	0.320388	0.471429	0.471429			0.390365	0.656425	0.640327
GPR61	0.320312	0.506173	0.471264			0.345455	0.540925	0.527778
PIAS4	0.320312	0.476744	0.471264			0.475556	0.922414	0.90678
STEAP3	0.320261	0.485149	0.471154			0.318471	0.486381	0.46729
KLHL22	0.320261	0.5	0.471154			0.358946	0.579787	0.559932
EPHB4	0.320261	0.497462	0.471154			0.365079	0.588372	0.575
SLC18A2	0.320225	0.487179	0.471074			0.336207	0.515873	0.506494
PGLYRP2	0.320197	0.507812	0.471014			0.284264	0.414048	0.397163
LRTM1	0.32	0.533333	0.470588			0.262605	0.378788	0.356125
ARSH	0.32	0.475248	0.470588			0.267191	0.383099	0.364611
VIL1	0.32	0.514286	0.470588			0.290188	0.42378	0.408824
KLK6	0.32	0.5	0.470588			0.301418	0.435897	0.431472
SEMA6A	0.32	0.470588	0.470588			0.339464	0.520564	0.513921
ADARB2	0.32	0.477064	0.470588			0.371183	0.594801	0.590288
BEND3	0.32	0.496552	0.470588			0.377821	0.615016	0.607256
GPR4	0.32	0.484848	0.470588			0.381679	0.630252	0.617284
SLC9A5	0.319797	0.5	0.470149			0.342679	0.539216	0.521327
SERPINE1	0.319672	0.4875	0.46988			0.297071	0.431611	0.422619
PLXNA1	0.319672	0.492114	0.46988			0.385942	0.638829	0.628511
TNPO2	0.319588	0.5	0.469697			0.536554	1.16761	1.15775
SLC12A4	0.319444	0.475862	0.469388			0.345665	0.540121	0.52827
DMPK	0.319444	0.474227	0.469388			0.345745	0.543933	0.528455
OR4E2	0.319444	0.484211	0.469388			0.440972	0.814103	0.78882
RADIL	0.319403	0.493088	0.469298			0.318841	0.485804	0.468085
C1orf94	0.319372	0.5	0.469231			0.299202	0.439453	0.426945
CTDP1	0.319372	0.488	0.469231			0.346769	0.552408	0.530853
ENTPD8	0.319328	0.506667	0.469136			0.322927	0.497744	0.476945
RFX2	0.319249	0.489209	0.468966			0.350181	0.543925	0.538889
SH2D3A	0.319149	0.491803	0.46875			0.317708	0.481833	0.465649
LRTM2	0.319149	0.494505	0.46875			0.358261	0.567493	0.558266
OR4D11	0.319149	0.48913	0.46875			0.378571	0.650307	0.609195
LRRTM1	0.319149	0.486111	0.46875			0.378981	0.623037	0.610256
CAND2	0.319066	0.491018	0.468571			0.337647	0.523723	0.509769
ZNF628	0.319048	0.485507	0.468531			0.433333	0.774368	0.764706
EEF2	0.319048	0.482014	0.468531			0.599359	1.52653	1.496
IL17RD	0.319018	0.5	0.468468			0.286286	0.412698	0.401122
CHRNB1	0.318966	0.513889	0.468354			0.299584	0.439919	0.427723
CBS	0.318841	0.478261	0.468085			0.344519	0.545133	0.525597
KIRREL3	0.318777	0.480263	0.467949			0.380952	0.630872	0.615385
LMAN1L	0.31875	0.495146	0.46789			0.320781	0.488323	0.472279
KCND3	0.31875	0.483412	0.46789			0.410615	0.703349	0.696682
ADAMTS7	0.318735	0.496212	0.467857			0.341454	0.535801	0.518497
KRT71	0.318681	0.47541	0.467742			0.281553	0.408451	0.391892
NEUROD1	0.318681	0.487395	0.467742			0.444785	0.83815	0.801105
FTMT	0.318627	0.481481	0.467626			0.305483	0.451737	0.43985
ZNF880	0.318584	0.521739	0.467532			0.277632	0.404215	0.384335
HHAT	0.318584	0.486486	0.467532			0.282024	0.412598	0.392804
GPR37	0.318584	0.486486	0.467532			0.303324	0.447853	0.435388
GRIN2C	0.318584	0.470588	0.467532			0.340947	0.533566	0.517329
LDHD	0.318584	0.48	0.467532			0.34359	0.545603	0.523438
GDAP1L1	0.318584	0.467532	0.467532			0.375839	0.629213	0.602151
HHIPL1	0.318519	0.488636	0.467391			0.328223	0.501736	0.488588
OR10H4	0.318519	0.488636	0.467391			0.396491	0.684848	0.656977
IRF8	0.318471	0.485437	0.46729			0.405872	0.68915	0.68314
KRT72	0.318436	0.483051	0.467213			0.307786	0.461679	0.44464
ABCB6	0.318436	0.491379	0.467213			0.321692	0.493814	0.474257
CHST5	0.318436	0.487179	0.467213			0.343885	0.537079	0.524123
EPC2	0.318436	0.487179	0.467213			0.356601	0.559524	0.554245
PCDH19	0.318386	0.481356	0.467105			0.351939	0.574074	0.543066
CDX4	0.318182	0.492958	0.466667			0.278195	0.395722	0.385417
SGK2	0.318182	0.47191	0.466667			0.311508	0.47432	0.45245
SFTPB	0.318182	0.5	0.466667			0.3186	0.485955	0.467568
TGM2	0.318182	0.496454	0.466667			0.319699	0.490909	0.469937
LLGL2	0.318182	0.482759	0.466667			0.321608	0.492308	0.474074
LRP8	0.318182	0.480392	0.466667			0.328446	0.495575	0.489083
KCNS1	0.318182	0.488372	0.466667			0.333333	0.509978	0.5
ZNF282	0.318182	0.485149	0.466667			0.348692	0.543689	0.535373
PRMT2	0.318182	0.492958	0.466667			0.35543	0.577982	0.551422
CAMTA1	0.317992	0.491909	0.466258			0.337014	0.518189	0.508327
MAG	0.317992	0.493506	0.466258			0.348276	0.543986	0.534392
KCNA10	0.317949	0.48062	0.466165			0.279823	0.39666	0.388548
CT47B1	0.317949	0.484375	0.466165			0.291101	0.426049	0.410638
PCDHB16	0.317949	0.488189	0.466165			0.338006	0.526061	0.510588
UMODL1	0.317919	0.495495	0.466102			0.296348	0.43595	0.421158
MAGEE1	0.317881	0.497409	0.466019			0.354051	0.554783	0.54811
OR4B1	0.317881	0.48	0.466019			0.421203	0.761658	0.727723
SERPINI1	0.317829	0.5125	0.465909			0.259709	0.356667	0.35082
SERPING1	0.317829	0.5	0.465909			0.303887	0.447917	0.436548
POU2F2	0.317829	0.518987	0.465909			0.408611	0.70547	0.690934
LRRIQ4	0.317757	0.49635	0.465753			0.259209	0.360531	0.349908
BCL2L12	0.317757	0.492754	0.465753			0.320117	0.486607	0.470842
GJC1	0.317757	0.492754	0.465753			0.399371	0.668421	0.664921
CACNG8	0.317757	0.485714	0.465753			0.479029	0.92735	0.919492
AVPR1A	0.317647	0.495413	0.465517			0.302926	0.450128	0.434568
LOXL3	0.317647	0.495413	0.465517			0.304381	0.452055	0.437569
KIF21B	0.317554	0.48494	0.465318			0.338964	0.523934	0.512777
OPN1LW	0.31746	0.487805	0.465116			0.714286	2.61905	2.5
ACSM1	0.317391	0.5	0.464968			0.280702	0.418511	0.390244
ASCC2	0.317365	0.495327	0.464912			0.300971	0.440758	0.430556
IL2RB	0.317365	0.481818	0.464912			0.323171	0.486239	0.477477
POU4F3	0.317365	0.464912	0.464912			0.331942	0.5	0.496875
P2RY14	0.317308	0.5	0.464789			0.296482	0.429091	0.421429
SNTG2	0.317308	0.487685	0.464789			0.309967	0.47563	0.449206
TMEM184A	0.317308	0.515625	0.464789			0.319902	0.48972	0.470377
NPAS1	0.317308	0.492537	0.464789			0.529116	1.18694	1.12367
FLNA	0.31728	0.488017	0.46473			0.399672	0.680643	0.665755
SF3B2	0.317204	0.508621	0.464567			0.40146	0.679012	0.670732
SLCO1B7	0.317164	0.508982	0.464481			0.252061	0.352554	0.337008
MCHR2	0.317073	0.524194	0.464286			0.292105	0.431907	0.412639
FFAR2	0.317073	0.493671	0.464286			0.292952	0.430421	0.41433
JPH1	0.317073	0.478528	0.464286			0.344961	0.532934	0.526627
SOX8	0.317073	0.481481	0.464286			0.403259	0.682759	0.675768
TMPRSS9	0.316981	0.485549	0.464088			0.315473	0.478441	0.460863
OR1N2	0.316901	0.483871	0.463918			0.456835	0.913669	0.84106
ATP11A	0.316832	0.497409	0.463768			0.339695	0.524043	0.514451
ST6GALNAC6	0.316832	0.484848	0.463768			0.361323	0.583162	0.565737
ELK1	0.316832	0.470588	0.463768			0.400538	0.668161	0.668161
RAP1GAP	0.31677	0.490385	0.463636			0.381391	0.627946	0.616529
TUBA3E	0.316667	0.475	0.463415			0.333333	0.510549	0.5
TUBGCP6	0.316667	0.483636	0.463415			0.336996	0.524466	0.508287
FGFRL1	0.316667	0.481013	0.463415			0.358862	0.570435	0.559727
CAMK1G	0.316667	0.493506	0.463415			0.378641	0.631068	0.609375
CUL4A	0.316667	0.493506	0.463415			0.386651	0.632768	0.630394
ZBTB46	0.316602	0.476744	0.463277			0.41838	0.728421	0.719335
OR2A14	0.316456	0.47619	0.462963			0.421927	0.783951	0.729885
MGRN1	0.316456	0.471698	0.462963			0.423619	0.751923	0.734962
GIMAP6	0.316384	0.509091	0.46281			0.302846	0.458462	0.434402
RHBDF2	0.316384	0.491228	0.46281			0.339399	0.534384	0.513774
ATG9A	0.316384	0.486957	0.46281			0.378653	0.618257	0.609407
PTBP1	0.316384	0.474576	0.46281			0.485808	0.950855	0.944798
ZNF618	0.316279	0.489209	0.462585			0.382694	0.626277	0.619942
CYP1B1	0.316239	0.480519	0.4625			0.292276	0.428135	0.412979
PARVG	0.316239	0.506849	0.4625			0.308118	0.46648	0.445333
TRMT2A	0.316239	0.506849	0.4625			0.340095	0.526802	0.515371
BCR	0.315972	0.484043	0.461929			0.349018	0.542621	0.536141
KRT40	0.315789	0.506024	0.461538			0.269537	0.393939	0.368996
SLC22A6	0.315789	0.482143	0.461538			0.308333	0.465409	0.445783
FKRP	0.315789	0.467532	0.461538			0.31746	0.488722	0.465116
CDH3	0.315789	0.490909	0.461538			0.33941	0.526954	0.513798
GPR20	0.315789	0.47191	0.461538			0.345725	0.536023	0.528409
EPS15L1	0.315789	0.481752	0.461538			0.352595	0.551302	0.544629
IRX1	0.315789	0.46789	0.461538			0.359494	0.566866	0.561265
OR5B12	0.315789	0.469565	0.461538			0.381148	0.632653	0.615894
OR2W5	0.315789	0.487805	0.461538			0.394928	0.694268	0.652695
ONECUT2	0.315789	0.477273	0.461538			0.583524	1.41667	1.4011
PTPRN2	0.315678	0.476038	0.4613			0.317737	0.477514	0.46571
FZD7	0.315508	0.475806	0.460938			0.410615	0.713592	0.696682
FSHR	0.315457	0.490196	0.460829			0.282678	0.405488	0.394074
TTLL12	0.315436	0.494737	0.460784			0.298817	0.444934	0.42616
PSD4	0.315385	0.485207	0.460674			0.317164	0.473274	0.464481
GALNT16	0.315385	0.465909	0.460674			0.3184	0.48184	0.467136
CLEC16A	0.315385	0.465909	0.460674			0.346244	0.540293	0.529623
CHST10	0.315385	0.488095	0.460674			0.366265	0.603175	0.577947
MRGPRX4	0.315385	0.460674	0.460674			0.380208	0.663636	0.613445
CACNA1B	0.315375	0.471513	0.460653			0.33942	0.614885	0.51382
TTC30B	0.315315	0.492958	0.460526			0.299774	0.446128	0.42811
BASP1	0.315315	0.466667	0.460526			0.322493	0.477912	0.476
DEAF1	0.315315	0.492958	0.460526			0.363325	0.595506	0.570659
FGD5	0.315217	0.473469	0.460317			0.310705	0.453852	0.450758
SERPINB4	0.315152	0.481481	0.460177			0.276292	0.403646	0.381773
TBXAS1	0.315152	0.468468	0.460177			0.312095	0.476898	0.453689
TUB	0.315152	0.472727	0.460177			0.319942	0.476087	0.470462
IL17RC	0.315152	0.472727	0.460177			0.339049	0.528448	0.512971
HTR1A	0.315068	0.5	0.46			0.338208	0.518207	0.51105
LRP5	0.315041	0.471125	0.459941			0.358164	0.572715	0.55803
HCFC1	0.315011	0.464174	0.459877			0.480201	0.928311	0.923821
ANO9	0.315	0.477273	0.459854			0.328511	0.505566	0.489228
CXCR1	0.314961	0.45977	0.45977			0.30083	0.447531	0.430267
KRT80	0.314961	0.519481	0.45977			0.337789	0.52354	0.510092
SLC26A11	0.314917	0.478992	0.459677			0.354781	0.572872	0.549861
ADRA1D	0.314815	0.472222	0.459459			0.319635	0.487805	0.469799
THOP1	0.314815	0.476636	0.459459			0.351588	0.551546	0.54223
P4HB	0.314815	0.492754	0.459459			0.39281	0.665914	0.64693
CORO1A	0.314815	0.465753	0.459459			0.406305	0.696697	0.684366
OR2G2	0.314741	0.481707	0.459302			0.423841	0.766467	0.735632
TAAR6	0.314685	0.505618	0.459184			0.270707	0.382857	0.371191
ZNF366	0.314685	0.491803	0.459184			0.296636	0.428571	0.421739
BMP2	0.314516	0.506494	0.458824			0.362445	0.582456	0.568493
NT5C1A	0.314516	0.464286	0.458824			0.457413	0.90625	0.843023
MAN1C1	0.314465	0.505051	0.458716			0.335697	0.516364	0.505338
NPSR1	0.314433	0.484127	0.458647			0.389522	0.709544	0.63806
RNF207	0.314286	0.478261	0.458333			0.308809	0.463663	0.446779
AFAP1	0.314286	0.5	0.458333			0.326855	0.497312	0.485564
ADCY9	0.314149	0.476364	0.458042			0.368421	0.59087	0.583333
PLOD1	0.314136	0.48	0.458015			0.319392	0.487663	0.469274
SUSD5	0.314103	0.538462	0.457944			0.284625	0.415584	0.397869
PCDHB12	0.314103	0.475728	0.457944			0.319635	0.486111	0.469799
MAS1L	0.31405	0.487179	0.457831			0.247059	0.347682	0.328125
F2RL1	0.31405	0.506667	0.457831			0.285714	0.411215	0.4
ZBTB48	0.31405	0.481013	0.457831			0.346847	0.546099	0.531034
SLC25A47	0.31405	0.463415	0.457831			0.349112	0.565495	0.536364
ACTL6B	0.31405	0.513514	0.457831			0.466851	0.944134	0.875648
TFAP2B	0.31401	0.471014	0.457746			0.354059	0.558583	0.548128
ZP1	0.313953	0.504673	0.457627			0.317839	0.494141	0.46593
PTPRE	0.313953	0.495413	0.457627			0.33114	0.512733	0.495082
B4GALNT4	0.313869	0.467391	0.457447			0.382528	0.637969	0.619507
PROX1	0.313783	0.479821	0.457265			0.381102	0.623711	0.615776
FAAH2	0.313725	0.5	0.457143			0.269055	0.383829	0.368093
PM20D1	0.313725	0.466019	0.457143			0.309148	0.459016	0.447489
TUT1	0.313725	0.489796	0.457143			0.315201	0.476888	0.460283
LAP3	0.313725	0.5	0.457143			0.323873	0.494898	0.479012
PSMC4	0.313725	0.470588	0.457143			0.510086	1.07273	1.04118
DCLK3	0.313653	0.480226	0.456989			0.309556	0.459082	0.448343
ABCC1	0.313636	0.489362	0.456954			0.375128	0.612364	0.600328
CYP2A7	0.313609	0.481818	0.456897			0.298992	0.439145	0.426518
CCKBR	0.313559	0.477419	0.45679			0.285525	0.411877	0.399628
GRM4	0.313559	0.495536	0.45679			0.340517	0.528075	0.51634
SERPINF2	0.313559	0.468354	0.45679			0.343416	0.53022	0.523035
NPC1L1	0.313539	0.478261	0.456747			0.46208	0.930709	0.859012
SH3PXD2A	0.313492	0.473054	0.456647			0.346126	0.535274	0.529347
KCNT1	0.313466	0.47651	0.456592			0.386673	0.647922	0.630452
URB1	0.313433	0.485549	0.456522			0.319354	0.484864	0.469192
CELSR1	0.313433	0.482255	0.456522			0.35501	0.556519	0.550412
FCRL2	0.313364	0.489209	0.456376			0.29099	0.438753	0.410417
HSPA6	0.313333	0.460784	0.456311			0.298908	0.439416	0.426346
ACOX3	0.313253	0.472727	0.45614			0.296132	0.435228	0.420721
CTTN	0.313253	0.490566	0.45614			0.32514	0.5	0.481788
YTHDF1	0.313253	0.481481	0.45614			0.375389	0.605528	0.600998
MTMR12	0.313253	0.485981	0.45614			0.673203	2.34091	2.06
CDH22	0.313218	0.467811	0.456067			0.367101	0.596091	0.580032
ULK1	0.313208	0.474286	0.456044			0.380861	0.620293	0.615145
DDC	0.313131	0.466165	0.455882			0.295129	0.431866	0.418699
TULP1	0.313131	0.476923	0.455882			0.311333	0.46729	0.45208
AGXT	0.313043	0.467532	0.455696			0.281525	0.419214	0.391837
ZDHHC11	0.313043	0.486486	0.455696			0.301272	0.444836	0.431172
LIMD1	0.313043	0.486486	0.455696			0.30967	0.454219	0.448582
NTF3	0.313043	0.461538	0.455696			0.57	1.37349	1.32558
RAB11FIP4	0.312977	0.482353	0.455556			0.393812	0.663507	0.649652
CYP2F1	0.312925	0.484211	0.455446			0.299204	0.440536	0.426948
NLRP7	0.312871	0.487654	0.455331			0.508759	1.10596	1.03566
HKDC1	0.312757	0.477987	0.45509			0.278219	0.395928	0.385463
TAF3	0.312757	0.520548	0.45509			0.35084	0.543974	0.540453
SIGLEC1	0.312741	0.473684	0.455056			0.302579	0.454325	0.433853
DSPP	0.312676	0.47234	0.454918			0.336768	0.515353	0.507768
BTNL8	0.3125	0.507246	0.454545			0.278761	0.405579	0.386503
KLF17	0.3125	0.46875	0.454545			0.283554	0.414365	0.395778
SELENBP1	0.3125	0.5	0.454545			0.30506	0.468037	0.438972
AIPL1	0.3125	0.5	0.454545			0.323967	0.501279	0.479218
LRRC8D	0.3125	0.495495	0.454545			0.347158	0.536817	0.531765
TAB1	0.3125	0.45977	0.454545			0.355769	0.563452	0.552239
FIGN	0.3125	0.479452	0.454545			0.356284	0.560137	0.55348
STK40	0.3125	0.483871	0.454545			0.369388	0.589577	0.585761
DPYSL4	0.3125	0.471698	0.454545			0.379571	0.624481	0.611789
MCOLN1	0.3125	0.473684	0.454545			0.392947	0.675325	0.647303
NOTUM	0.3125	0.506329	0.454545			0.55157	1.31551	1.23
SYNJ2	0.312292	0.467662	0.454106			0.319582	0.483794	0.469685
CDHR3	0.312169	0.483607	0.453846			0.304988	0.461634	0.438824
OR4X1	0.312139	0.469565	0.453782			0.355978	0.595455	0.552743
OR10Q1	0.312102	0.475728	0.453704			0.446429	0.847458	0.806452
PCBP3	0.312057	0.505747	0.453608			0.292148	0.428088	0.412724
OR8S1	0.312057	0.478261	0.453608			0.420896	0.774725	0.726804
OR1B1	0.312	0.5	0.453488			0.404844	0.745223	0.680233
KIR2DS4	0.311927	0.465753	0.453333			0.271579	0.383929	0.372832
STC1	0.311927	0.453333	0.453333			0.343478	0.533784	0.523179
CAPN10	0.311927	0.478873	0.453333			0.35447	0.572148	0.549114
TRIM62	0.311927	0.465753	0.453333			0.357198	0.580278	0.55569
NDRG1	0.311927	0.465753	0.453333			0.572816	1.43902	1.34091
CHST15	0.311828	0.479339	0.453125			0.321974	0.491039	0.47487
PNLDC1	0.311765	0.490741	0.452991			0.338303	0.540293	0.511265
KLHDC7A	0.311615	0.474138	0.452675			0.313283	0.478927	0.456204
CHST3	0.311594	0.488636	0.452632			0.344	0.5375	0.52439
DAPK3	0.311594	0.472527	0.452632			0.399408	0.685279	0.665025
ZSCAN10	0.311538	0.465517	0.452514			0.327697	0.501232	0.487425
FLVCR2	0.311475	0.463415	0.452381			0.304207	0.447619	0.437209
TRIM72	0.311475	0.493506	0.452381			0.320611	0.486755	0.47191
UNK	0.311475	0.478992	0.452381			0.400726	0.682474	0.668687
NXPH2	0.311475	0.481013	0.452381			0.547486	1.225	1.20988
ABCC5	0.311429	0.488789	0.452282			0.366738	0.599303	0.579125
PIGQ	0.311377	0.468468	0.452174			0.303956	0.454829	0.43669
TGFBI	0.311377	0.464286	0.452174			0.334842	0.516579	0.503401
SHKBP1	0.311321	0.485294	0.452055			0.341814	0.538328	0.519328
POMT1	0.311258	0.465347	0.451923			0.325518	0.517192	0.48262
ZNF281	0.311224	0.488	0.451852			0.349451	0.539898	0.537162
PKP1	0.311111	0.474576	0.451613			0.303487	0.445983	0.435724
SLC17A9	0.311111	0.466667	0.451613			0.344828	0.547945	0.526316
B3GAT1	0.311111	0.459016	0.451613			0.408072	0.708171	0.689394
NMUR1	0.311111	0.477273	0.451613			0.455882	0.878543	0.837838
TRAPPC9	0.311047	0.488584	0.451477			0.360344	0.585828	0.56334
TDRD12	0.310924	0.486842	0.45122			0.248841	0.348862	0.331276
MMP20	0.310924	0.468354	0.45122			0.320225	0.502941	0.471074
OSR2	0.310924	0.486842	0.45122			0.377691	0.620579	0.606918
OR9Q1	0.310924	0.4625	0.45122			0.416988	0.75	0.715232
KAT5	0.310924	0.45679	0.45122			0.452073	0.853301	0.825059
ANP32C	0.310881	0.508475	0.451128			0.1529	0.184322	0.180498
KRT76	0.310881	0.458015	0.451128			0.286511	0.415858	0.401562
PRDM13	0.310881	0.465116	0.451128			0.358684	0.570261	0.559295
MN1	0.31085	0.475336	0.451064			0.498096	1.02028	0.992413
SLCO5A1	0.310811	0.46371	0.45098			0.302488	0.445748	0.433666
RANGAP1	0.310811	0.455446	0.45098			0.361596	0.578842	0.566406
PPAN-P2RY11	0.310734	0.486726	0.45082			0.371783	0.616176	0.591808
ACTR1B	0.31068	0.477612	0.450704			0.272472	0.38189	0.374517
PDP2	0.31068	0.477612	0.450704			0.323636	0.498599	0.478495
ANKH	0.31068	0.470588	0.450704			0.415094	0.715	0.709677
DPEP2	0.310606	0.471264	0.450549			0.30837	0.472973	0.44586
LMNB2	0.310606	0.450549	0.450549			0.365385	0.581262	0.575758
ZNF169	0.310559	0.5	0.45045			0.301075	0.456212	0.430769
CTBP2	0.310559	0.462963	0.45045			0.337248	0.525719	0.508861
IGHMBP2	0.310502	0.503704	0.450331			0.300646	0.448336	0.429891
MAP3K11	0.310502	0.48227	0.450331			0.390877	0.65684	0.641705
SLC36A2	0.310345	0.454545	0.45			0.296796	0.435644	0.422062
ZNF74	0.310345	0.477876	0.45			0.326904	0.507087	0.485671
DUSP10	0.310345	0.494505	0.45			0.336996	0.513966	0.508287
OPRM1	0.310345	0.482143	0.45			0.363995	0.610132	0.572314
IGSF9B	0.310345	0.468208	0.45			0.366702	0.591027	0.579036
OR1J2	0.310345	0.459184	0.45			0.398927	0.705696	0.66369
LHX5	0.310345	0.473684	0.45			0.404814	0.690299	0.680147
SLC22A7	0.310127	0.471154	0.449541			0.326506	0.500924	0.484794
TBL3	0.310127	0.475728	0.449541			0.340543	0.537302	0.5164
CBLC	0.310078	0.481928	0.449438			0.32	0.491228	0.470588
CYP2D6	0.31	0.476923	0.449275			0.305235	0.459279	0.439336
GLI4	0.31	0.455882	0.449275			0.311239	0.465517	0.451883
FANCE	0.31	0.462687	0.449275			0.331158	0.513924	0.495122
B3GNT9	0.31	0.455882	0.449275			0.364723	0.596577	0.574118
MAZ	0.31	0.476923	0.449275			0.435845	0.779599	0.772563
CELF2	0.309859	0.468085	0.44898			0.484009	0.945833	0.938017
KLHL38	0.309783	0.467213	0.448819			0.294322	0.433447	0.417077
ADCK2	0.309735	0.460526	0.448718			0.300254	0.441121	0.429091
GPR176	0.309735	0.466667	0.448718			0.304274	0.455243	0.437346
CABP4	0.309735	0.466667	0.448718			0.322064	0.502778	0.475066
PPM1F	0.309735	0.486111	0.448718			0.337638	0.527378	0.509749
ADORA2A	0.309735	0.466667	0.448718			0.349693	0.544586	0.537736
ATP10A	0.309623	0.480519	0.448485			0.329601	0.502598	0.491649
FKBP10	0.309524	0.452174	0.448276			0.326697	0.498831	0.485216
FZD9	0.309524	0.464286	0.448276			0.348485	0.557576	0.534884
OR10J5	0.309524	0.468468	0.448276			0.439834	0.815385	0.785185
GRID2IP	0.309392	0.466667	0.448			0.339568	0.524368	0.514159
TSPYL6	0.309353	0.457447	0.447917			0.281065	0.39749	0.390947
CARD9	0.309353	0.477778	0.447917			0.337287	0.52359	0.508949
OR52E2	0.309211	0.47	0.447619			0.416938	0.735632	0.715084
TAS1R2	0.309148	0.460094	0.447489			0.31	0.469105	0.449275
SLC6A16	0.309091	0.455357	0.447368			0.283019	0.413793	0.394737
CNGA3	0.309091	0.463636	0.447368			0.290456	0.42618	0.409357
ZNF384	0.309091	0.485714	0.447368			0.386885	0.643052	0.631016
OR6X1	0.309091	0.478873	0.447368			0.452915	0.885965	0.827869
NADK	0.309091	0.472222	0.447368			0.700873	2.74359	2.34307
NUP210	0.309051	0.468227	0.447284			0.471933	0.952781	0.893701
CACNA2D2	0.309013	0.45283	0.447205			0.341182	0.602122	0.517871
HDAC10	0.308943	0.487179	0.447059			0.337743	0.522262	0.509988
DTX2	0.308943	0.463415	0.447059			0.349438	0.551418	0.537133
NT5C1B	0.308943	0.466258	0.447059			0.44123	0.85614	0.789644
PITPNM3	0.30888	0.454545	0.446927			0.358298	0.565101	0.558355
TMPRSS3	0.308824	0.477273	0.446809			0.322775	0.49652	0.476615
ARAP1	0.308772	0.473118	0.446701			0.341786	0.531277	0.519263
OR5M3	0.308725	0.446602	0.446602			0.366972	0.621762	0.57971
BCAN	0.308642	0.474684	0.446429			0.304598	0.454657	0.438017
XKR6	0.308642	0.513699	0.446429			0.418785	0.73025	0.720532
HTR5A	0.308594	0.461988	0.446328			0.343985	0.538235	0.524355
IQSEC3	0.308594	0.456647	0.446328			0.359384	0.570306	0.560997
DPP3	0.308511	0.479339	0.446154			0.319797	0.484615	0.470149
EML3	0.308511	0.467742	0.446154			0.377674	0.621241	0.606875
ZDHHC8	0.308511	0.467742	0.446154			0.383186	0.630277	0.621234
POU4F2	0.308458	0.462687	0.446043			0.377329	0.612091	0.605985
CEACAM18	0.308411	0.485294	0.445946			0.279018	0.399361	0.386997
CCDC27	0.308411	0.471429	0.445946			0.30098	0.46049	0.430573
TBKBP1	0.308411	0.458333	0.445946			0.344059	0.53876	0.524528
SPTAN1	0.308378	0.490085	0.445876			0.38902	0.64752	0.636714
ALDH4A1	0.308333	0.480519	0.445783			0.355324	0.566421	0.551167
OR8H3	0.308333	0.465409	0.445783			0.381538	0.656085	0.616915
RPL3L	0.308271	0.460674	0.445652			0.32746	0.501124	0.4869
ELMO3	0.308219	0.463918	0.445545			0.327103	0.505051	0.486111
ZNF519	0.308176	0.471154	0.445455			0.226727	0.309426	0.293204
ARHGAP39	0.308157	0.474419	0.445415			0.358112	0.569456	0.557904
AHDC1	0.308157	0.465753	0.445415			0.364712	0.584057	0.574088
OR13F1	0.30814	0.473214	0.445378			0.402098	0.714286	0.672515
TAGAP	0.308081	0.480315	0.445255			0.341646	0.522901	0.518939
KRT5	0.308036	0.472603	0.445161			0.302198	0.44	0.433071
UBE2O	0.308	0.490446	0.445087			0.378778	0.615721	0.60973
ZNF681	0.307971	0.469613	0.445026			0.226437	0.309262	0.292719
TNC	0.307803	0.472284	0.444676			0.292162	0.420205	0.412752
ZMYND10	0.307692	0.516129	0.444444			0.269344	0.382476	0.368633
SNX20	0.307692	0.467532	0.444444			0.294235	0.435294	0.416901
CD1D	0.307692	0.472727	0.444444			0.298405	0.442568	0.425325
ST8SIA6	0.307692	0.487805	0.444444			0.300429	0.44586	0.429448
CEACAM1	0.307692	0.48	0.444444			0.304279	0.451765	0.437358
STAT2	0.307692	0.533333	0.444444			0.315123	0.474423	0.460117
FGD2	0.307692	0.463768	0.444444			0.32211	0.4974	0.475166
ATRIP	0.307692	0.470588	0.444444			0.328054	0.495896	0.488215
ACSF2	0.307692	0.48	0.444444			0.328549	0.506143	0.489311
GPR78	0.307692	0.451613	0.444444			0.348404	0.55042	0.534694
PKN1	0.307692	0.465753	0.444444			0.35223	0.552788	0.543757
POFUT2	0.307692	0.467532	0.444444			0.352572	0.564257	0.544574
CACNG7	0.307692	0.457143	0.444444			0.356322	0.559567	0.553571
IRX2	0.307692	0.447368	0.444444			0.374802	0.615085	0.599493
TLR9	0.307692	0.459016	0.444444			0.375407	0.618792	0.601043
FAR1	0.307692	0.455696	0.444444			0.388268	0.649533	0.634703
OR5F1	0.307692	0.456376	0.444444			0.407855	0.737705	0.688776
OR2AG2	0.307692	0.449438	0.444444			0.41875	0.744444	0.72043
OR14J1	0.307692	0.449438	0.444444			0.423423	0.803419	0.734375
DNM1	0.307692	0.470588	0.444444			0.436158	0.786151	0.773547
MYBPC2	0.307692	0.466667	0.444444			0.561845	1.51412	1.2823
CLSTN3	0.307393	0.459302	0.44382			0.317638	0.472747	0.465498
FKBP15	0.307339	0.489051	0.443709			0.319273	0.492492	0.469018
KANK2	0.307339	0.458904	0.443709			0.341251	0.52497	0.518029
CACNA2D3	0.307305	0.491935	0.443636			0.288971	0.539835	0.406412
PSG9	0.307292	0.475806	0.443609			0.291755	0.436709	0.41194
CERCAM	0.307229	0.459459	0.443478			0.309202	0.463235	0.447602
RALGDS	0.307229	0.455357	0.443478			0.370968	0.6	0.589744
SOX3	0.307229	0.490385	0.443478			0.423469	0.751131	0.734513
PCDHGA11	0.30719	0.467662	0.443396			0.313551	0.478852	0.456772
FGR	0.30719	0.451923	0.443396			0.390543	0.667665	0.640805
HCN2	0.30719	0.451923	0.443396			0.473277	0.913303	0.898529
ATP2A3	0.307167	0.463918	0.44335			0.384035	0.641807	0.623469
ABCB9	0.307143	0.472527	0.443299			0.325292	0.495848	0.482122
DDX54	0.307018	0.469799	0.443038			0.30599	0.449287	0.440902
SLC37A2	0.307018	0.454545	0.443038			0.321027	0.4914	0.472813
RNF165	0.307018	0.479452	0.443038			0.385604	0.638298	0.627615
DLGAP1	0.306991	0.457014	0.442982			0.34765	0.541667	0.532919
KAZN	0.306977	0.452055	0.442953			0.34744	0.544385	0.532427
ITPRIPL1	0.306931	0.484375	0.442857			0.272727	0.395122	0.375
C16orf89	0.306931	0.462687	0.442857			0.302205	0.463221	0.433086
PRDM14	0.306931	0.473282	0.442857			0.333333	0.513158	0.5
DUSP5	0.306931	0.455882	0.442857			0.347826	0.545455	0.533333
MRGPRE	0.306931	0.469697	0.442857			0.407407	0.727273	0.6875
EEF1A2	0.306878	0.453125	0.442748			0.647558	1.85976	1.83735
CDH26	0.306818	0.496933	0.442623			0.297479	0.445844	0.423445
PLEC	0.306809	0.467911	0.442605			0.358553	0.575603	0.558974
ADCY5	0.306792	0.476364	0.442568			0.328844	0.593117	0.489967
AVIL	0.306748	0.458716	0.442478			0.275578	0.396675	0.38041
PRKCD	0.306748	0.46729	0.442478			0.403298	0.68798	0.675879
KCNH3	0.306723	0.447853	0.442424			0.390824	0.648801	0.641562
BCL2	0.306701	0.447368	0.442379			0.41411	0.718085	0.706806
SIRPG	0.306667	0.5	0.442308			0.31453	0.489362	0.458853
FSTL4	0.306667	0.45098	0.442308			0.326944	0.495161	0.485759
LRRC55	0.306667	0.46	0.442308			0.35567	0.563265	0.552
CCR6	0.306569	0.477273	0.442105			0.402367	0.697436	0.673267
CDH23	0.306509	0.452007	0.44198			0.325942	0.492875	0.483553
GLCCI1	0.306452	0.452381	0.44186			0.326531	0.503371	0.484848
PTDSS1	0.306452	0.44186	0.44186			0.381062	0.632184	0.615672
OR9A2	0.306452	0.475	0.44186			0.402913	0.734513	0.674797
MAT1A	0.306452	0.452381	0.44186			0.450867	0.854015	0.821053
ZER1	0.306358	0.452991	0.441667			0.425107	0.748744	0.739454
ZNF395	0.306306	0.465753	0.441558			0.353698	0.555556	0.547264
OR2D2	0.306306	0.472222	0.441558			0.3879	0.694268	0.633721
EEF1B2	0.306306	0.459459	0.441558			0.390244	0.659794	0.64
ZBED4	0.306306	0.475524	0.441558			0.402396	0.678147	0.673349
NET1	0.306306	0.472222	0.441558			0.407484	0.750958	0.687719
RAB40C	0.306306	0.447368	0.441558			0.459877	0.871345	0.851429
URB2	0.30625	0.471154	0.441441			0.288535	0.424194	0.405551
OR8B4	0.30625	0.457944	0.441441			0.452915	0.878261	0.827869
GRM1	0.306228	0.472	0.441397			0.393641	0.665813	0.649189
ZMIZ2	0.306122	0.449102	0.441176			0.333028	0.502762	0.499314
CHTF18	0.306122	0.454545	0.441176			0.354377	0.563972	0.548892
OASL	0.306122	0.494505	0.441176			0.401709	0.737255	0.671429
PLA2G6	0.306011	0.46281	0.440945			0.29391	0.432468	0.41625
DNAH17	0.306006	0.464858	0.440936			0.342428	0.538303	0.520746
ELFN2	0.305994	0.449074	0.440909			0.398305	0.666142	0.661972
ZFYVE28	0.30597	0.453039	0.44086			0.330705	0.506034	0.494108
SLC29A3	0.30597	0.450549	0.44086			0.348733	0.546729	0.535469
TUBB8	0.30597	0.44086	0.44086			0.419009	0.752404	0.721198
NCOR2	0.30597	0.479532	0.44086			0.69589	2.35185	2.28829
CHST8	0.305936	0.452703	0.440789			0.306931	0.452555	0.442857
ATXN7	0.305882	0.45614	0.440678			0.300933	0.433857	0.430478
KCNQ2	0.305882	0.454148	0.440678			0.340172	0.530444	0.515547
ISLR	0.305882	0.460177	0.440678			0.371901	0.606469	0.592105
HIP1R	0.305825	0.466667	0.440559			0.324015	0.500982	0.479323
IFFO1	0.305785	0.45679	0.440476			0.312649	0.466192	0.454861
DTL	0.305785	0.4625	0.440476			0.316761	0.477516	0.463617
LAIR1	0.305785	0.480519	0.440476			0.320961	0.488372	0.472669
CHFR	0.305732	0.466019	0.440367			0.336782	0.526032	0.507799
RHOBTB2	0.305732	0.466019	0.440367			0.3858	0.641536	0.628134
RASAL3	0.305677	0.460526	0.440252			0.292376	0.432166	0.41318
LAMC3	0.305606	0.459239	0.440104			0.297151	0.437708	0.42278
SERPINA12	0.305556	0.468085	0.44			0.271914	0.385787	0.373464
PMPCA	0.305556	0.44898	0.44			0.336868	0.522749	0.507996
GALNT9	0.305556	0.445946	0.44			0.348946	0.551852	0.535971
POU2F1	0.305556	0.458333	0.44			0.353175	0.549383	0.546012
ZFR2	0.305439	0.474026	0.439759			0.305158	0.461466	0.439177
SLC7A2	0.305389	0.459459	0.439655			0.294559	0.433103	0.417553
GRAMD1A	0.305389	0.451327	0.439655			0.347115	0.543675	0.531664
SEMA4B	0.305389	0.459459	0.439655			0.362299	0.597688	0.568132
KCNA1	0.305369	0.450495	0.439614			0.432282	0.787162	0.761438
TTLL3	0.305344	0.444444	0.43956			0.28975	0.428913	0.407955
FBLN7	0.305344	0.43956	0.43956			0.324978	0.493207	0.481432
AFF3	0.305344	0.463768	0.43956			0.33	0.497644	0.492537
SYT5	0.305344	0.449438	0.43956			0.344765	0.545714	0.526171
GALNT6	0.305263	0.47541	0.439394			0.296053	0.439453	0.420561
ALOX15B	0.305195	0.460784	0.439252			0.308839	0.469256	0.446841
ABCA3	0.305182	0.466276	0.439227			0.339093	0.526139	0.513072
PCDHB8	0.305155	0.461059	0.439169			0.22	0.286861	0.282051
CTNND2	0.305152	0.46856	0.439163			0.371831	0.6	0.591928
AHNAK	0.305144	0.454355	0.439148			0.283095	0.397426	0.394885
RHOBTB1	0.305085	0.473684	0.439024			0.319092	0.485772	0.468627
MLIP	0.305085	0.45	0.439024			0.365768	0.611765	0.57671
CAPN1	0.304965	0.488636	0.438776			0.307514	0.457045	0.444073
EPB41L1	0.304965	0.457447	0.438776			0.312621	0.463977	0.454802
DVL2	0.304965	0.438776	0.438776			0.33942	0.522746	0.513821
GJD2	0.304965	0.488636	0.438776			0.428571	0.769737	0.75
IRGC	0.304933	0.453333	0.43871			0.388889	0.655738	0.636364
KCNK2	0.304878	0.458716	0.438596			0.345088	0.543651	0.526923
USP6NL	0.304813	0.471074	0.438462			0.296975	0.433155	0.422425
PKP2	0.304795	0.451777	0.438424			0.267742	0.392899	0.365639
CYSLTR2	0.304762	0.470588	0.438356			0.24359	0.333333	0.322034
SCN5A	0.30473	0.461667	0.438291			0.275962	0.452681	0.381142
FAAH	0.304688	0.453488	0.438202			0.332871	0.519481	0.49896
DYRK1B	0.304688	0.453488	0.438202			0.336037	0.513274	0.506108
FADS2	0.304688	0.448276	0.438202			0.389351	0.651811	0.637602
CHST1	0.304688	0.450867	0.438202			0.392927	0.662252	0.647249
NLGN4Y	0.304688	0.4875	0.438202			0.546296	1.26882	1.20408
VWCE	0.304688	0.458824	0.438202			0.916877	0	11.0303
ZNF333	0.304636	0.46	0.438095			0.269947	0.389635	0.369763
C12orf42	0.304636	0.446602	0.438095			0.27209	0.388778	0.373796
MAGEA4	0.304636	0.455446	0.438095			0.295082	0.420233	0.418605
DMBX1	0.304636	0.45098	0.438095			0.320833	0.478261	0.472393
CYTH4	0.304636	0.455446	0.438095			0.340909	0.531915	0.517241
CRTC2	0.304598	0.456897	0.438017			0.324305	0.487885	0.479957
PAXIP1	0.304598	0.495327	0.438017			0.359879	0.575806	0.562205
VPS18	0.304569	0.465116	0.437956			0.310259	0.458693	0.449819
PHF12	0.304545	0.458904	0.437908			0.342702	0.527197	0.521379
GAB4	0.304511	0.440217	0.437838			0.310983	0.466205	0.451342
NOD2	0.304498	0.458333	0.437811			0.422043	0.775947	0.730233
LRRC30	0.304348	0.451613	0.4375			0.30839	0.459459	0.445902
SLC43A3	0.304348	0.460526	0.4375			0.310406	0.466844	0.450128
SOHLH1	0.304348	0.448718	0.4375			0.341927	0.53617	0.519588
CD6	0.304348	0.451613	0.4375			0.347368	0.555789	0.532258
PYGB	0.304348	0.448718	0.4375			0.362184	0.577495	0.56785
SRPK3	0.304348	0.460526	0.4375			0.369949	0.593117	0.587174
PLIN4	0.304348	0.449541	0.4375			0.373342	0.608649	0.595767
BEGAIN	0.304348	0.446809	0.4375			0.394111	0.659091	0.650467
PRKD2	0.304348	0.457516	0.4375			0.395021	0.668539	0.652949
MFSD2A	0.304348	0.466667	0.4375			0.417098	0.73516	0.715556
HIVEP3	0.304281	0.454338	0.437363			0.320434	0.477491	0.471528
PTPRN	0.304207	0.451923	0.437209			0.310714	0.458498	0.450777
ABCA8	0.304175	0.451327	0.437143			0.261296	0.372382	0.353721
EXTL3	0.304147	0.458333	0.437086			0.351759	0.558214	0.542636
SLC38A10	0.304094	0.45614	0.436975			0.318339	0.48294	0.467005
ZNF358	0.304094	0.448276	0.436975			0.396417	0.660448	0.656772
NMBR	0.304094	0.436975	0.436975			0.444634	0.83121	0.800613
FRMD3	0.304054	0.463918	0.436893			0.322059	0.485588	0.475054
SLC27A1	0.304054	0.45	0.436893			0.330218	0.510433	0.493023
RAVER2	0.304	0.457831	0.436782			0.278873	0.408247	0.386719
DDO	0.304	0.513514	0.436782			0.299578	0.462541	0.427711
OR6Q1	0.304	0.463415	0.436782			0.400778	0.730496	0.668831
DPYSL2	0.304	0.452381	0.436782			0.418338	0.719212	0.719212
ONECUT1	0.304	0.44186	0.436782			0.49537	1.01905	0.981651
ZNF212	0.303922	0.449275	0.43662			0.30809	0.466146	0.445274
IQCG	0.303922	0.455882	0.43662			0.309278	0.472441	0.447761
SIM1	0.303896	0.455253	0.436567			0.32265	0.482428	0.476341
PKLR	0.303867	0.462185	0.436508			0.286616	0.416514	0.40177
TUBB3	0.303867	0.458333	0.436508			0.447466	0.832184	0.809843
SLITRK5	0.303846	0.455331	0.436464			0.359262	0.566372	0.560701
ZNF443	0.303797	0.457143	0.436364			0.231343	0.314038	0.300971
MAN1B1	0.303797	0.448598	0.436364			0.348175	0.571359	0.534153
KCNC2	0.303754	0.46114	0.436275			0.415025	0.729437	0.709474
OR6C2	0.303704	0.445652	0.43617			0.380783	0.625731	0.614943
DCAF15	0.303704	0.471264	0.43617			0.405502	0.689024	0.682093
EXD3	0.303665	0.446154	0.43609			0.320862	0.490468	0.472454
KLHL34	0.303571	0.453333	0.435897			0.321593	0.492958	0.474041
ACTG2	0.303571	0.465753	0.435897			0.471875	0.920732	0.893491
SGSM1	0.303514	0.461165	0.43578			0.341445	0.531361	0.518476
KRT78	0.303448	0.463158	0.435644			0.277551	0.401575	0.384181
GRID1	0.303393	0.449704	0.43553			0.345088	0.533074	0.526923
KIF4B	0.30339	0.455471	0.435523			0.253698	0.359916	0.339941
OTOP2	0.303371	0.446281	0.435484			0.29	0.425081	0.408451
COL6A3	0.303298	0.459196	0.435335			0.297636	0.432646	0.423763
KIRREL2	0.303279	0.453988	0.435294			0.32846	0.505247	0.489115
PSKH2	0.303226	0.443396	0.435185			0.262321	0.37931	0.355603
ACAP1	0.303226	0.474747	0.435185			0.317616	0.478776	0.465451
ATP9A	0.303226	0.477157	0.435185			0.434741	0.790576	0.7691
FMNL1	0.303167	0.458904	0.435065			0.338006	0.517282	0.510588
SCARA5	0.30303	0.47619	0.434783			0.331973	0.515856	0.496945
TECPR1	0.30303	0.45977	0.434783			0.340467	0.535714	0.516224
MMP25	0.30303	0.444444	0.434783			0.399108	0.710317	0.664193
NOLC1	0.30303	0.481928	0.434783			0.424512	0.773463	0.737654
ATXN2	0.30292	0.466292	0.434555			0.322107	0.485677	0.475159
LMX1A	0.302885	0.470149	0.434483			0.346341	0.539924	0.529851
NTSR1	0.302857	0.449153	0.434426			0.459168	0.900302	0.849003
MEX3B	0.302857	0.438017	0.434426			0.521481	1.1	1.08978
HTRA3	0.302817	0.447917	0.434343			0.333333	0.510588	0.5
DYRK2	0.302817	0.457447	0.434343			0.357812	0.561275	0.557178
OTUD6A	0.302817	0.452632	0.434343			0.381526	0.625	0.616883
LPCAT1	0.302817	0.447917	0.434343			0.383202	0.640351	0.621277
SV2C	0.302752	0.44898	0.434211			0.316268	0.477663	0.462562
ADAMTS8	0.302752	0.468085	0.434211			0.320665	0.490315	0.472028
SEZ6L	0.302752	0.463158	0.434211			0.345169	0.533844	0.527112
XKR4	0.302671	0.465753	0.434043			0.37395	0.601351	0.597315
PCDH7	0.302663	0.454545	0.434028			0.351456	0.55071	0.541916
PCDHGC5	0.302632	0.463087	0.433962			0.0359281	0.0373832	0.0372671
CORO2B	0.302632	0.455446	0.433962			0.35041	0.549839	0.539432
OR51E1	0.302632	0.46	0.433962			0.420875	0.776398	0.726744
DPP6	0.302521	0.459574	0.433735			0.3292	0.507163	0.490758
TMEM108	0.302469	0.453704	0.433628			0.330619	0.495122	0.493917
IFT140	0.302452	0.449393	0.433594			0.31025	0.466745	0.449801
SIGLEC5	0.302439	0.466165	0.433566			0.305152	0.458333	0.439163
KCNF1	0.302439	0.446043	0.433566			0.451376	0.842466	0.822742
TIE1	0.302428	0.447712	0.433544			0.309524	0.463784	0.448276
FLRT2	0.302428	0.453642	0.433544			0.366412	0.585366	0.578313
DNM2	0.302419	0.490196	0.433526			0.413347	0.713058	0.704584
LAMA5	0.302405	0.447458	0.433498			0.349518	0.549686	0.537321
GPR15	0.302326	0.443182	0.433333			0.277027	0.401961	0.383178
H6PD	0.302326	0.45614	0.433333			0.322395	0.493099	0.475787
PRR23A	0.302326	0.443182	0.433333			0.330709	0.512195	0.494118
AP3B2	0.302326	0.457286	0.433333			0.340778	0.528205	0.516939
SLC6A4	0.302326	0.468468	0.433333			0.348243	0.545	0.534314
LSAMP	0.302326	0.443182	0.433333			0.36236	0.578475	0.568282
OR1N1	0.302326	0.464286	0.433333			0.385714	0.650602	0.627907
ATP2A2	0.302326	0.467626	0.433333			0.537329	1.18837	1.16136
MYH7	0.302267	0.460653	0.433213			0.414331	0.736655	0.70745
OR6K6	0.302198	0.470085	0.433071			0.436066	0.815951	0.773256
TMPRSS4	0.302158	0.451613	0.43299			0.288262	0.425439	0.40501
TATDN2	0.302158	0.47191	0.43299			0.291347	0.423567	0.411128
MAST3	0.302158	0.459016	0.43299			0.373815	0.609073	0.596973
PCDHGB6	0.302115	0.44843	0.4329			0.311492	0.469605	0.452416
AARS2	0.302083	0.456693	0.432836			0.282828	0.413167	0.394366
LILRB1	0.302053	0.463964	0.432773			0.310885	0.468713	0.451136
SLC7A4	0.302013	0.459184	0.432692			0.305682	0.449833	0.440262
NPR3	0.302013	0.478723	0.432692			0.526786	1.18593	1.11321
SLFN14	0.301887	0.457143	0.432432			0.275485	0.400353	0.380235
TRIM4	0.301887	0.470588	0.432432			0.289809	0.42623	0.408072
DBH	0.301887	0.467153	0.432432			0.305497	0.455118	0.439878
CHAD	0.301887	0.450704	0.432432			0.311153	0.458564	0.451701
DOC2A	0.301887	0.444444	0.432432			0.340986	0.524183	0.517419
SNTA1	0.301887	0.444444	0.432432			0.362832	0.584323	0.569444
PRPF19	0.301887	0.457143	0.432432			0.44591	0.8125	0.804762
SEC61A1	0.301887	0.457143	0.432432			0.479319	0.938095	0.920561
PRDM15	0.301829	0.445946	0.432314			0.344298	0.540448	0.525084
SLC6A2	0.301818	0.456044	0.432292			0.388736	0.649083	0.635955
FGF23	0.301775	0.443478	0.432203			0.285714	0.403509	0.4
EPN1	0.301775	0.439655	0.432203			0.361635	0.576923	0.566502
WAC	0.301775	0.515152	0.432203			0.933628	0	14.0667
SLC15A4	0.301724	0.486111	0.432099			0.334129	0.524345	0.501792
SLC38A2	0.301724	0.443038	0.432099			0.337449	0.51735	0.509317
UPF1	0.301653	0.470968	0.431953			0.473545	0.914821	0.899497
NDN	0.301653	0.450617	0.431953			0.757991	3.38776	3.13208
OR5L1	0.301527	0.44382	0.431694			0.469914	0.970414	0.886486
TDP1	0.301471	0.455556	0.431579			0.272425	0.389241	0.374429
CATSPER4	0.301471	0.450549	0.431579			0.298165	0.448276	0.424837
GIMAP5	0.301471	0.450549	0.431579			0.321839	0.5	0.474576
PRDM8	0.301471	0.445652	0.431579			0.322835	0.485782	0.476744
CLEC14A	0.301418	0.459459	0.431472			0.343394	0.534447	0.522983
PLOD3	0.30137	0.463158	0.431373			0.319717	0.483373	0.469977
CES2	0.30137	0.494382	0.431373			0.423963	0.765073	0.736
MED24	0.30131	0.485915	0.43125			0.35267	0.56994	0.544808
VILL	0.301282	0.451923	0.431193			0.294935	0.436123	0.41831
ZSWIM5	0.301255	0.473684	0.431138			0.307234	0.454088	0.443489
PTK7	0.301255	0.444444	0.431138			0.348387	0.542714	0.534653
OR5D16	0.301255	0.45	0.431138			0.396226	0.7	0.65625
KY	0.301205	0.454545	0.431034			0.321029	0.483165	0.472817
SMOX	0.301075	0.440945	0.430769			0.36858	0.599509	0.583732
MYH14	0.301075	0.446215	0.430769			0.607857	1.6929	1.55009
PGD	0.300971	0.469697	0.430556			0.367837	0.587021	0.581871
ABCG4	0.300971	0.43662	0.430556			0.374817	0.619855	0.599532
NDUFV1	0.300971	0.442857	0.430556			0.556136	1.39216	1.25294
NAGA	0.300971	0.455882	0.430556			0.561151	1.5	1.27869
GRIN2B	0.300945	0.448692	0.430502			0.355145	0.755054	0.550737
NAPSA	0.300885	0.435897	0.43038			0.599315	1.78571	1.49573
ACAD10	0.300847	0.470199	0.430303			0.284627	0.419753	0.397872
ZC3HAV1	0.300847	0.464052	0.430303			0.303391	0.451569	0.435526
TTYH3	0.300813	0.440476	0.430233			0.34629	0.540441	0.52973
ANKRD34A	0.300813	0.445783	0.430233			0.377246	0.609677	0.605769
OR2G3	0.300813	0.453988	0.430233			0.408511	0.721805	0.690647
ATP2A1	0.300781	0.461078	0.430168			0.380461	0.640374	0.614103
ZFP14	0.300752	0.444444	0.430108			0.269136	0.3879	0.368243
SLC2A5	0.300699	0.443299	0.43			0.335878	0.526316	0.505747
ASS1	0.300699	0.457447	0.43			0.336364	0.530086	0.506849
CLPTM1L	0.300699	0.438776	0.43			0.369289	0.602484	0.585513
DLGAP2	0.300683	0.455172	0.429967			0.364567	0.577453	0.573731
PCDHB15	0.300668	0.448505	0.429936			0.341157	0.535526	0.517812
RASGRP4	0.300613	0.471154	0.429825			0.333703	0.517182	0.500832
OR52L1	0.300613	0.471154	0.429825			0.407767	0.732558	0.688525
KCNH2	0.300595	0.446903	0.429787			0.314688	0.481559	0.45919
SMURF1	0.300578	0.472727	0.429752			0.40081	0.693925	0.668919
ZNF467	0.300546	0.443548	0.429688			0.299929	0.443277	0.428426
TCERG1L	0.300546	0.443548	0.429688			0.308594	0.468379	0.446328
OR13C4	0.300518	0.453125	0.42963			0.387597	0.680272	0.632911
OR52E8	0.300518	0.453125	0.42963			0.39403	0.666667	0.650246
FBXO10	0.300493	0.472868	0.429577			0.312084	0.467903	0.453665
TOP3A	0.300493	0.455224	0.429577			0.312448	0.47198	0.454436
ITGB5	0.300493	0.445255	0.429577			0.323561	0.492562	0.478331
KRT4	0.300469	0.470588	0.42953			0.313643	0.472458	0.456967
ELN	0.300469	0.438356	0.42953			0.321956	0.485396	0.47483
NTM	0.300469	0.438356	0.42953			0.56196	1.35417	1.28289
DYRK1A	0.300412	0.521429	0.429412			0.329718	0.708625	0.491909
NLRP3	0.30033	0.466667	0.429245			0.477157	0.95723	0.912621
CILP2	0.300242	0.438163	0.429066			0.312024	0.464853	0.45354
LILRB4	0.3	0.440559	0.428571			0.242158	0.326565	0.319536
TNFRSF10A	0.3	0.455696	0.428571			0.247552	0.345029	0.328996
SLFN12	0.3	0.444444	0.428571			0.261128	0.368973	0.353414
RIPK3	0.3	0.463918	0.428571			0.261498	0.371963	0.354093
FAM71C	0.3	0.441176	0.428571			0.262295	0.363636	0.355556
SELE	0.3	0.472603	0.428571			0.272851	0.3861	0.375235
IQCH	0.3	0.44898	0.428571			0.274131	0.397536	0.37766
POTEJ	0.3	0.452055	0.428571			0.275362	0.394191	0.38
RTP2	0.3	0.434783	0.428571			0.293011	0.434263	0.414449
SERINC2	0.3	0.44	0.428571			0.303922	0.453027	0.43662
UNC93A	0.3	0.453782	0.428571			0.306849	0.463768	0.442688
APEH	0.3	0.44	0.428571			0.316198	0.489489	0.462411
RIMKLA	0.3	0.47619	0.428571			0.321519	0.484733	0.473881
OSBPL7	0.3	0.435897	0.428571			0.326382	0.498408	0.48452
PRAMEF12	0.3	0.442953	0.428571			0.345205	0.545455	0.527197
KCNQ4	0.3	0.442623	0.428571			0.346963	0.540984	0.531306
CKAP4	0.3	0.44	0.428571			0.347995	0.542339	0.53373
SETD3	0.3	0.471429	0.428571			0.351307	0.556995	0.541562
TBX5	0.3	0.442623	0.428571			0.359712	0.603865	0.561798
CASZ1	0.3	0.464516	0.428571			0.366667	0.581973	0.578947
PTOV1	0.3	0.434783	0.428571			0.371145	0.603943	0.590193
SYT3	0.3	0.436047	0.428571			0.373708	0.608173	0.596698
OR1S1	0.3	0.428571	0.428571			0.378082	0.635945	0.60793
MPEG1	0.3	0.45	0.428571			0.387399	0.684834	0.632385
TAF4	0.3	0.471698	0.428571			0.390419	0.646825	0.640472
PTPN6	0.3	0.4375	0.428571			0.418182	0.728713	0.71875
MPPED1	0.3	0.44	0.428571			0.541045	1.25	1.17886
MYO15A	0.299781	0.443366	0.428125			0.590361	1.6583	1.44118
TRIML1	0.299639	0.448649	0.427835			0.287113	0.424096	0.402746
ANKRD27	0.299611	0.447674	0.427778			0.325402	0.503683	0.482363
GPR139	0.299517	0.442857	0.427586			0.366412	0.592593	0.578313
ARHGEF4	0.299492	0.464567	0.427536			0.310477	0.464331	0.450278
MYO1F	0.299492	0.450382	0.427536			0.657534	2.12389	1.92
ZNF615	0.299465	0.455285	0.427481			0.236386	0.323729	0.309562
ANKRD18B	0.299465	0.455285	0.427481			0.261722	0.373026	0.354503
KRT31	0.299435	0.441667	0.427419			0.315697	0.476064	0.46134
CACNA2D4	0.299401	0.469484	0.42735			0.27957	0.470925	0.38806
HTR7	0.299401	0.446429	0.42735			0.381783	0.63961	0.617555
TULP2	0.29932	0.44898	0.427184			0.286149	0.418708	0.400853
TMEM132C	0.299296	0.449735	0.427136			0.33381	0.510941	0.501073
MIER2	0.29927	0.43617	0.427083			0.457413	0.865672	0.843023
PLXNB2	0.299257	0.448468	0.427056			0.412593	0.714491	0.702398
PCDHB11	0.299252	0.444444	0.427046			0.330909	0.510662	0.494565
DHX40	0.299213	0.463415	0.426966			0.367754	0.602374	0.581662
OR13A1	0.299213	0.426966	0.426966			0.420513	0.759259	0.725664
JUP	0.299145	0.4375	0.426829			0.326624	0.497908	0.485054
D2HGDH	0.299145	0.4375	0.426829			0.349852	0.555164	0.538111
BICD2	0.299145	0.429448	0.426829			0.367978	0.590977	0.582222
PPP5C	0.299145	0.454545	0.426829			0.386121	0.640118	0.628986
NR1D1	0.299145	0.448718	0.426829			0.486772	0.978723	0.948454
PML	0.299107	0.443709	0.426752			0.303309	0.445144	0.435356
CCR5	0.299065	0.450704	0.426667			0.261719	0.371191	0.354497
PRSS22	0.299065	0.450704	0.426667			0.317259	0.482625	0.464684
BGN	0.299065	0.426667	0.426667			0.358824	0.567442	0.559633
INSRR	0.299065	0.445993	0.426667			0.375325	0.615478	0.600833
CSNK1G2	0.299065	0.450704	0.426667			0.425234	0.752066	0.739837
JAG1	0.298932	0.464088	0.426396			0.351809	0.587404	0.542755
TBC1D8	0.298893	0.468208	0.426316			0.30744	0.45915	0.443918
ZNF468	0.298851	0.436975	0.42623			0.260536	0.371585	0.352332
CHRNB3	0.298851	0.444444	0.42623			0.306911	0.466049	0.442815
HTR1B	0.298851	0.433333	0.42623			0.349241	0.547619	0.536667
OAS3	0.298805	0.46875	0.426136			0.426246	0.815175	0.742908
SPRED2	0.298701	0.479167	0.425926			0.322204	0.498708	0.475369
EDAR	0.298701	0.442308	0.425926			0.326379	0.511682	0.484513
LRRN1	0.298701	0.433962	0.425926			0.331671	0.500942	0.496269
CD22	0.298561	0.463687	0.425641			0.330049	0.508346	0.492647
GALNT12	0.298507	0.444444	0.425532			0.296788	0.440789	0.422047
ENAH	0.298507	0.444444	0.425532			0.320423	0.479578	0.471503
CSPG5	0.298507	0.449438	0.425532			0.334351	0.505774	0.502294
ZGPAT	0.298507	0.465116	0.425532			0.351828	0.553023	0.542802
MEI1	0.29845	0.432584	0.425414			0.406349	0.722144	0.684492
CCKAR	0.298429	0.438462	0.425373			0.289474	0.415617	0.407407
FREM1	0.298387	0.452138	0.425287			0.274165	0.391064	0.377723
PI16	0.298387	0.440476	0.425287			0.322951	0.493734	0.476998
IGFALS	0.298387	0.45122	0.425287			0.351807	0.560102	0.542751
ZNF33A	0.298343	0.477876	0.425197			0.269425	0.390351	0.368785
TACC3	0.298343	0.457627	0.425197			0.330632	0.506203	0.493947
EPHA10	0.298295	0.454545	0.425101			0.315491	0.486408	0.460902
PNPLA7	0.298295	0.446809	0.425101			0.326609	0.50364	0.485022
DCAF4	0.298246	0.447368	0.425			0.313643	0.472458	0.456967
CALN1	0.298246	0.447368	0.425			0.356522	0.577465	0.554054
ADAMTS4	0.298246	0.456376	0.425			0.377764	0.627492	0.607107
LTBP2	0.298137	0.44582	0.424779			0.324192	0.489796	0.479709
HIC2	0.298137	0.424779	0.424779			0.403871	0.681917	0.677489
FBN3	0.298122	0.443281	0.424749			0.298907	0.441753	0.426345
PGK2	0.298113	0.441341	0.424731			0.271898	0.388021	0.373434
HPX	0.298077	0.462687	0.424658			0.317568	0.490862	0.465347
CHRM1	0.298077	0.43662	0.424658			0.42029	0.734177	0.725
ADAMTS17	0.298013	0.46875	0.424528			0.340394	0.535244	0.516057
ABCG1	0.29798	0.437037	0.42446			0.352317	0.562404	0.543964
ILF3	0.29798	0.427536	0.42446			0.409307	0.698541	0.692926
NRP2	0.297945	0.457895	0.42439			0.476959	0.951724	0.911894
KRT77	0.297872	0.428571	0.424242			0.292419	0.427817	0.413265
WNT3A	0.297872	0.446809	0.424242			0.31448	0.464883	0.458746
SMPD3	0.297753	0.456897	0.424			0.355404	0.558959	0.55136
EGR2	0.297753	0.438017	0.424			0.362039	0.573816	0.567493
PRSS54	0.29771	0.448276	0.423913			0.32357	0.493617	0.478351
PADI6	0.29771	0.443182	0.423913			0.340474	0.534513	0.516239
EDNRA	0.29771	0.453488	0.423913			0.398281	0.674757	0.661905
OR2T10	0.29771	0.443182	0.423913			0.410256	0.747082	0.695652
NOP2	0.29771	0.443182	0.423913			0.440574	0.802239	0.787546
VN1R2	0.297619	0.46729	0.423729			0.271689	0.395349	0.373041
UGT1A7	0.297619	0.442478	0.423729			0.29798	0.452107	0.42446
USP35	0.297619	0.438596	0.423729			0.31901	0.480392	0.468451
CUX2	0.297571	0.44012	0.423631			0.358501	0.565755	0.558849
RHBDF1	0.297561	0.442029	0.423611			0.349259	0.557162	0.536709
GRAMD1B	0.297561	0.445255	0.423611			0.35074	0.552812	0.540214
ZNF365	0.297521	0.473684	0.423529			0.293698	0.435626	0.415825
AHCY	0.297521	0.433735	0.423529			0.352288	0.560706	0.543897
OR4C16	0.297521	0.436364	0.423529			0.352342	0.584459	0.544025
OR1I1	0.297521	0.45	0.423529			0.361702	0.60101	0.566667
SCAP	0.297521	0.439024	0.423529			0.364793	0.587284	0.574289
KRT25	0.297468	0.451923	0.423423			0.282197	0.411602	0.39314
EEFSEC	0.297468	0.451923	0.423423			0.321748	0.490166	0.474378
KCNK5	0.297468	0.439252	0.423423			0.385057	0.634069	0.626168
OR7E24	0.297468	0.439252	0.423423			0.402878	0.713376	0.674699
NXF3	0.297436	0.471545	0.423358			0.430435	0.792	0.755725
DHX37	0.297398	0.449438	0.42328			0.353786	0.558763	0.547475
GABRR2	0.297297	0.428571	0.423077			0.268908	0.378251	0.367816
ZNF343	0.297297	0.464789	0.423077			0.278364	0.410506	0.38574
CHST6	0.297297	0.443548	0.423077			0.307796	0.469262	0.44466
CCDC151	0.297297	0.44898	0.423077			0.3125	0.482673	0.454545
GYG2	0.297297	0.434211	0.423077			0.317328	0.481013	0.464832
COL9A3	0.297297	0.447154	0.423077			0.339927	0.526674	0.514983
TBX20	0.297297	0.434211	0.423077			0.343413	0.533557	0.523026
TEX13B	0.297297	0.464789	0.423077			0.351085	0.549383	0.541033
OR13C8	0.297297	0.443548	0.423077			0.416342	0.753521	0.713333
CDC42BPB	0.297229	0.464567	0.422939			0.389408	0.645439	0.637755
CDHR4	0.297101	0.431579	0.42268			0.305977	0.462888	0.440874
ST8SIA2	0.297101	0.450549	0.42268			0.374207	0.625442	0.597973
RYR1	0.29709	0.437594	0.422658			0.329045	0.50262	0.490413
ABCC12	0.297052	0.438127	0.422581			0.285196	0.420303	0.398986
KLHL33	0.29703	0.434783	0.422535			0.280922	0.403614	0.390671
PACS2	0.29703	0.447761	0.422535			0.399814	0.672414	0.666149
SSTR1	0.29697	0.433628	0.422414			0.354839	0.553459	0.55
CDH4	0.296935	0.430556	0.422343			0.379253	0.617568	0.610963
ZNF347	0.296928	0.47541	0.42233			0.244335	0.34349	0.323338
SLC26A9	0.296928	0.435	0.42233			0.326067	0.491108	0.483827
GPR37L1	0.296875	0.44186	0.422222			0.307692	0.467662	0.444444
SPATA5L1	0.296875	0.469136	0.422222			0.330464	0.50763	0.493571
ATP13A1	0.296875	0.463415	0.422222			0.378653	0.619543	0.609407
DDX51	0.296875	0.447059	0.422222			0.381091	0.63747	0.615746
OR6V1	0.296875	0.436782	0.422222			0.40724	0.737705	0.687023
SLIT1	0.296837	0.434164	0.422145			0.358802	0.571012	0.559581
CYP4F12	0.296804	0.464286	0.422078			0.26	0.367925	0.351351
DTX1	0.296804	0.448276	0.422078			0.380142	0.627635	0.613272
ZBTB17	0.296774	0.464646	0.422018			0.404901	0.691235	0.680392
FBXO46	0.296703	0.439024	0.421875			0.414573	0.715835	0.708155
OR6T1	0.296703	0.435484	0.421875			0.4375	0.841772	0.777778
SLIT3	0.296667	0.445	0.421801			0.345186	0.541631	0.527151
ZNF816	0.296651	0.449275	0.421769			0.241096	0.332703	0.31769
PLCB3	0.296636	0.447005	0.421739			0.385144	0.63854	0.626398
DEPTOR	0.29661	0.460526	0.421687			0.259766	0.364384	0.350923
AGTR2	0.29661	0.460526	0.421687			0.267559	0.377358	0.365297
XPOT	0.29661	0.47619	0.421687			0.313023	0.462898	0.455652
PTGIR	0.29661	0.4375	0.421687			0.340249	0.537118	0.515723
EFR3B	0.29661	0.460526	0.421687			0.379501	0.638695	0.611607
SLC6A6	0.296552	0.443299	0.421569			0.386364	0.643026	0.62963
NPHP4	0.29653	0.435185	0.421525			0.429093	0.802048	0.751599
PTGIS	0.296512	0.443478	0.421488			0.304221	0.456332	0.437238
ZNF317	0.296512	0.439655	0.421488			0.317322	0.481236	0.464819
CAMK2B	0.296512	0.425	0.421488			0.448418	0.838046	0.812968
OLFML2A	0.296482	0.437037	0.421429			0.404545	0.719677	0.679389
NOX4	0.296482	0.464567	0.421429			0.436482	0.864516	0.774566
DNAI2	0.29646	0.449664	0.421384			0.322503	0.497217	0.476021
COL6A2	0.296392	0.432331	0.421245			0.349702	0.553377	0.537756
TRIM6-TRIM34	0.296296	0.466667	0.421053			0.271331	0.386861	0.372365
SMYD1	0.296296	0.426667	0.421053			0.309722	0.459794	0.448692
PNPLA1	0.296296	0.438356	0.421053			0.310924	0.466387	0.45122
EEPD1	0.296296	0.444444	0.421053			0.318741	0.482402	0.467871
EDEM1	0.296296	0.438356	0.421053			0.320542	0.493913	0.471761
LDB3	0.296296	0.459016	0.421053			0.320966	0.48249	0.472681
RANBP10	0.296296	0.444444	0.421053			0.329399	0.498377	0.4912
SLC15A3	0.296296	0.432432	0.421053			0.329962	0.506796	0.492453
SLC4A1	0.296296	0.429268	0.421053			0.341284	0.529161	0.518106
OR5C1	0.296296	0.438356	0.421053			0.40566	0.75	0.68254
SKI	0.296296	0.45977	0.421053			0.41637	0.724907	0.713415
ZBTB20	0.296296	0.433498	0.421053			0.423592	0.750594	0.734884
FKBP8	0.296296	0.434783	0.421053			0.441758	0.794466	0.791339
CYP46A1	0.296296	0.454545	0.421053			0.443532	0.815094	0.797048
KLHL15	0.296296	0.45977	0.421053			0.531469	1.16031	1.13433
ANKFN1	0.296178	0.434579	0.420814			0.287356	0.417101	0.403226
PLCH2	0.296137	0.448052	0.420732			0.324902	0.497817	0.481266
KCNB1	0.296089	0.451064	0.420635			0.398136	0.676471	0.661504
POU3F4	0.296089	0.434426	0.420635			0.401869	0.712707	0.671875
SYK	0.296073	0.451613	0.420601			0.413223	0.714286	0.704225
USP17L2	0.296053	0.454545	0.420561			0.286038	0.424888	0.400634
TMEM63A	0.296053	0.459184	0.420561			0.331243	0.516287	0.495312
GPA33	0.296	0.45679	0.420455			0.306428	0.463801	0.44181
SYT15	0.296	0.420455	0.420455			0.316478	0.482072	0.46301
MAD1L1	0.295918	0.432836	0.42029			0.311958	0.473684	0.453401
ALDH1A2	0.295918	0.456693	0.42029			0.339161	0.522911	0.513228
P2RY8	0.295858	0.420168	0.420168			0.398693	0.683473	0.663043
MX1	0.295858	0.423729	0.420168			0.578714	1.63125	1.37368
HSPG2	0.295817	0.442623	0.420085			0.33834	0.521311	0.511351
MUC4	0.295812	0.441406	0.420074			0.577821	1.44126	1.36867
OTOP1	0.295775	0.431507	0.42			0.298088	0.454545	0.424679
PCDHA2	0.295752	0.434053	0.419954			0.301278	0.451613	0.431184
ATXN7L2	0.295699	0.443548	0.419847			0.331658	0.500759	0.496241
SLC37A3	0.295652	0.447368	0.419753			0.336752	0.535326	0.507732
PARP12	0.295597	0.460784	0.419643			0.334419	0.524702	0.502447
SLC5A3	0.295597	0.439252	0.419643			0.423447	0.745763	0.734446
DYSF	0.29558	0.442149	0.419608			0.298414	0.45015	0.425341
CATSPER1	0.295547	0.434524	0.41954			0.29979	0.44479	0.428144
ALDH1L1	0.295533	0.455026	0.419512			0.32368	0.48906	0.478589
IGSF3	0.295374	0.446237	0.419192			0.339154	0.526042	0.513211
BTN1A1	0.295337	0.448819	0.419118			0.291439	0.425532	0.411311
OPN4	0.295302	0.444444	0.419048			0.397924	0.694864	0.66092
OR4N4	0.295276	0.423729	0.418994			0.352078	0.566929	0.543396
SH3PXD2B	0.295238	0.43662	0.418919			0.299302	0.438619	0.427148
HNRNPH1	0.295238	0.442857	0.418919			0.49711	1	0.988506
PAF1	0.295082	0.455696	0.418605			0.388687	0.650485	0.635824
HPSE2	0.295	0.440299	0.41844			0.305405	0.449304	0.439689
ACTN2	0.295	0.457364	0.41844			0.343096	0.536649	0.522293
MAPK8IP3	0.294985	0.4329	0.41841			0.40705	0.706622	0.686482
FERD3L	0.294964	0.427083	0.418367			0.326165	0.494565	0.484043
KLHL3	0.294964	0.43617	0.418367			0.386861	0.646341	0.630952
TELO2	0.294931	0.453901	0.418301			0.344398	0.543075	0.525316
RASA3	0.294872	0.43949	0.418182			0.372531	0.613003	0.593703
OR7D4	0.294872	0.425926	0.418182			0.459732	0.907285	0.850932
ATP12A	0.294798	0.43038	0.418033			0.316541	0.47541	0.463145
OR51G1	0.294798	0.432203	0.418033			0.359736	0.605556	0.561856
SLC5A9	0.294737	0.448	0.41791			0.322421	0.503876	0.475842
BCL6B	0.294643	0.423077	0.417722			0.347756	0.539801	0.53317
SH3GL1	0.294643	0.44	0.417722			0.435981	0.784257	0.772989
CCDC88C	0.294624	0.433544	0.417683			0.320204	0.483747	0.47103
LRFN1	0.294574	0.41989	0.417582			0.390756	0.656085	0.641379
TUBB1	0.294521	0.438776	0.417476			0.313458	0.480418	0.456576
DENND2A	0.294498	0.441748	0.417431			0.316832	0.475836	0.463768
MSLN	0.294479	0.436364	0.417391			0.396533	0.70793	0.657092
CLPTM1	0.294479	0.461538	0.417391			0.421127	0.7475	0.727494
ZNF727	0.294393	0.446809	0.417219			0.230216	0.314496	0.299065
CYP4A11	0.294393	0.440559	0.417219			0.261155	0.367159	0.353464
CTAGE1	0.294304	0.434579	0.41704			0.247433	0.337063	0.328786
HHLA1	0.294118	0.425532	0.416667			0.279251	0.403153	0.387446
MASP2	0.294118	0.443548	0.416667			0.298464	0.440129	0.425443
CYP1A2	0.294118	0.428571	0.416667			0.298984	0.443011	0.426501
ZNF79	0.294118	0.428571	0.416667			0.303318	0.448598	0.435374
ENPP6	0.294118	0.434783	0.416667			0.311504	0.469333	0.452442
BTNL9	0.294118	0.432099	0.416667			0.313043	0.476033	0.455696
PEX5	0.294118	0.443038	0.416667			0.315789	0.478049	0.461538
PRSS16	0.294118	0.436893	0.416667			0.317949	0.48564	0.466165
PLA2G4E	0.294118	0.438596	0.416667			0.331546	0.5218	0.495989
RSBN1	0.294118	0.45082	0.416667			0.331652	0.507722	0.496226
FAM120A	0.294118	0.433071	0.416667			0.355895	0.56078	0.552542
ME3	0.294118	0.428571	0.416667			0.356568	0.578261	0.554167
SIK1	0.294118	0.424837	0.416667			0.362335	0.579225	0.568221
KIF3B	0.294118	0.466102	0.416667			0.371166	0.617347	0.590244
RASGRF1	0.294118	0.434783	0.416667			0.392494	0.657929	0.646075
OR10H3	0.294118	0.441176	0.416667			0.39934	0.711765	0.664835
KCNN3	0.294118	0.424242	0.416667			0.406077	0.7	0.683721
HRH2	0.294118	0.436893	0.416667			0.425532	0.758294	0.740741
FLI1	0.294118	0.426357	0.416667			0.430255	0.760417	0.755172
OGDHL	0.294118	0.43771	0.416667			0.447712	0.833671	0.810651
OR5L2	0.294118	0.430108	0.416667			0.451039	0.868571	0.821622
TNN	0.293907	0.430446	0.416244			0.283333	0.412621	0.395349
ALS2CL	0.293814	0.448819	0.416058			0.323362	0.510112	0.477895
IRX4	0.293785	0.452174	0.416			0.3298	0.505415	0.492091
TMC4	0.293785	0.433333	0.416			0.359443	0.586648	0.561141
CARS2	0.293706	0.42	0.415842			0.317546	0.485997	0.4653
PPP6R1	0.293706	0.446809	0.415842			0.343609	0.530778	0.523482
LILRA5	0.293651	0.45679	0.41573			0.305211	0.465909	0.439286
SLC12A3	0.293651	0.440476	0.41573			0.318578	0.480283	0.46752
ZNF460	0.293651	0.430233	0.41573			0.365385	0.5919	0.575758
CLIP2	0.293651	0.435294	0.41573			0.391176	0.653563	0.642512
DSCAML1	0.293622	0.433393	0.415673			0.379187	0.617934	0.61079
MBOAT1	0.293578	0.492308	0.415584			0.256499	0.360097	0.344988
CASQ1	0.293578	0.438356	0.415584			0.275641	0.401869	0.380531
MAGEA3	0.293578	0.457143	0.415584			0.302804	0.440217	0.434316
CD5	0.293578	0.444444	0.415584			0.318182	0.482759	0.466667
NT5DC2	0.293578	0.421053	0.415584			0.447219	0.836518	0.809035
SLC8A2	0.293478	0.426316	0.415385			0.472868	0.908511	0.897059
SLC18A1	0.293333	0.427184	0.415094			0.270613	0.383808	0.371014
LILRB5	0.293333	0.425806	0.415094			0.315341	0.481214	0.460581
SLC26A1	0.293333	0.435644	0.415094			0.339415	0.524934	0.513809
MASP1	0.293269	0.448529	0.414966			0.293194	0.432671	0.414815
SLCO2A1	0.293194	0.4375	0.414815			0.298113	0.445489	0.424731
ZNF506	0.293103	0.419753	0.414634			0.275626	0.404682	0.380503
TTC7A	0.293103	0.421488	0.414634			0.290025	0.426244	0.4085
SERPINA7	0.293103	0.451327	0.414634			0.3026	0.442907	0.433898
HPS4	0.293103	0.432203	0.414634			0.31845	0.479249	0.467245
F12	0.293103	0.447368	0.414634			0.331695	0.509434	0.496324
OR2S2	0.293103	0.419753	0.414634			0.394636	0.682119	0.651899
NPBWR2	0.293103	0.425	0.414634			0.474474	0.969325	0.902857
ZNF835	0.293059	0.435115	0.414545			0.300683	0.45993	0.429967
CELF4	0.29304	0.425532	0.414508			0.367606	0.59589	0.581292
FBLN2	0.293023	0.431507	0.414474			0.32294	0.491942	0.476974
MAPK8IP2	0.292994	0.425926	0.414414			0.412017	0.704846	0.70073
GLI2	0.292808	0.4275	0.414044			0.337618	0.51436	0.509702
TACR3	0.292776	0.452941	0.413978			0.264085	0.379747	0.358852
POLR3A	0.292776	0.44	0.413978			0.324523	0.501703	0.480435
TLR1	0.292683	0.461538	0.413793			0.255403	0.361613	0.343008
BCAR3	0.292683	0.461538	0.413793			0.290186	0.414752	0.40882
LARS2	0.292683	0.440367	0.413793			0.336673	0.532488	0.507553
STARD3	0.292683	0.428571	0.413793			0.344874	0.541841	0.526423
REN	0.292683	0.433735	0.413793			0.358407	0.580645	0.558621
OR2T27	0.292683	0.439024	0.413793			0.396714	0.704167	0.657588
NUFIP2	0.292683	0.455696	0.413793			0.478439	0.924603	0.917323
MYO1C	0.292683	0.451128	0.413793			0.629371	1.89474	1.69811
ZNF532	0.292605	0.4375	0.413636			0.358197	0.564951	0.558111
GPR12	0.292517	0.443299	0.413462			0.392045	0.657143	0.64486
COL5A1	0.292486	0.426644	0.413399			0.350486	0.551307	0.539613
DIXDC1	0.292453	0.430556	0.413333			0.289111	0.427778	0.40669
CRHBP	0.292453	0.449275	0.413333			0.308824	0.452586	0.446809
LGALS3BP	0.292453	0.469697	0.413333			0.313472	0.479208	0.456604
MATN1	0.292453	0.43662	0.413333			0.319936	0.485366	0.470449
ABTB1	0.292453	0.424658	0.413333			0.329624	0.510776	0.491701
ZNF70	0.292453	0.449275	0.413333			0.341772	0.549419	0.519231
OPTC	0.292453	0.424658	0.413333			0.435644	0.819876	0.77193
SLC28A3	0.292398	0.434783	0.413223			0.310388	0.48062	0.450091
RIPK4	0.292359	0.453608	0.413146			0.400367	0.68125	0.667688
PCDHGA7	0.292308	0.420664	0.413043			0.293429	0.432935	0.415287
ZKSCAN3	0.292308	0.481013	0.413043			0.312312	0.474886	0.454148
UBE3B	0.292254	0.439153	0.412935			0.300477	0.443662	0.429545
CLCN4	0.292237	0.421053	0.412903			0.507592	1.03084	1.03084
NDNF	0.292237	0.421053	0.412903			0.674419	2.1828	2.07143
FSD2	0.292208	0.454545	0.412844			0.289566	0.428076	0.407591
SGSM3	0.292208	0.428571	0.412844			0.336079	0.519084	0.506203
DVL1	0.292208	0.424528	0.412844			0.357784	0.564345	0.55711
OR4K1	0.292135	0.435754	0.412698			0.333333	0.520661	0.5
DDN	0.292035	0.44	0.4125			0.332146	0.507483	0.497333
RGS20	0.292035	0.4125	0.4125			0.332685	0.519757	0.498542
ZBTB22	0.292035	0.434211	0.4125			0.3464	0.533251	0.529988
ADCY2	0.291985	0.426184	0.412399			0.401719	0.67509	0.671454
ARHGEF15	0.291971	0.432432	0.412371			0.309711	0.457956	0.448669
PRR14	0.291971	0.43956	0.412371			0.313889	0.46888	0.45749
NR1I2	0.291971	0.454545	0.412371			0.425163	0.771654	0.739623
IRF2BP1	0.291971	0.425532	0.412371			0.449704	0.826087	0.817204
CAMK2A	0.291971	0.43956	0.412371			0.528358	1.16447	1.12025
MYH13	0.291933	0.447059	0.412297			0.594228	1.71149	1.46444
ACVRL1	0.291925	0.427273	0.412281			0.325284	0.512304	0.482105
PITPNM2	0.291908	0.433476	0.412245			0.37298	0.601042	0.594845
CACNA1A	0.291834	0.428291	0.412098			0.369841	0.605319	0.5869
MYT1L	0.291809	0.432911	0.412048			0.708207	2.60335	2.42708
HHIPL2	0.291667	0.442105	0.411765			0.279743	0.409733	0.388393
SPANXN2	0.291667	0.4375	0.411765			0.284314	0.449612	0.39726
PCDHGC3	0.291667	0.416667	0.411765			0.318856	0.477021	0.468118
ELAVL2	0.291667	0.45	0.411765			0.35124	0.550162	0.541401
PAX8	0.291667	0.443038	0.411765			0.354319	0.556322	0.548753
GPR55	0.291667	0.4375	0.411765			0.363388	0.599099	0.570815
ABCF2	0.291667	0.472973	0.411765			0.403716	0.705015	0.677054
OR2F1	0.291667	0.426087	0.411765			0.414894	0.75974	0.709091
DCAF4L1	0.291667	0.433628	0.411765			0.419512	0.738197	0.722689
OR10C1	0.291667	0.4375	0.411765			0.466667	0.913043	0.875
MYT1	0.29156	0.438462	0.411552			0.721088	2.77124	2.58537
IQGAP3	0.291536	0.438679	0.411504			0.287762	0.422556	0.404026
CYP4F3	0.291457	0.432836	0.411348			0.277644	0.39759	0.384359
GLI3	0.291444	0.434263	0.411321			0.328283	0.499651	0.488722
SHROOM1	0.291391	0.431373	0.411215			0.298201	0.437736	0.424908
ANKRD24	0.291391	0.44898	0.411215			0.310599	0.463984	0.450536
RBPJL	0.291391	0.431373	0.411215			0.352869	0.571146	0.545283
MID1	0.291391	0.458333	0.411215			0.455607	0.874439	0.83691
OGFR	0.291339	0.440476	0.411111			0.479881	0.993827	0.922636
PCDHGC4	0.291262	0.437956	0.410959			0.0305603	0.0316344	0.0315236
SMG9	0.291262	0.416667	0.410959			0.307432	0.467866	0.443902
DCBLD1	0.291262	0.428571	0.410959			0.312169	0.471246	0.453846
ANGPTL4	0.291262	0.434783	0.410959			0.314476	0.482143	0.458738
USP39	0.291262	0.434783	0.410959			0.327992	0.501441	0.488079
NFATC4	0.291228	0.430052	0.410891			0.507177	1.07071	1.02913
SYT9	0.291209	0.427419	0.410853			0.331269	0.504717	0.49537
SSTR4	0.291139	0.423313	0.410714			0.271111	0.388535	0.371951
OR13C3	0.291139	0.425926	0.410714			0.404682	0.737805	0.679775
SDK2	0.291118	0.438119	0.410673			0.3518	0.555741	0.542733
HECW1	0.291074	0.436047	0.410584			0.34962	0.547619	0.537563
EP400	0.291074	0.435203	0.410584			0.360802	0.571245	0.564461
SCTR	0.291045	0.443182	0.410526			0.280977	0.409669	0.390777
PIAS3	0.291045	0.428571	0.410526			0.289801	0.414591	0.408056
GPR75	0.291045	0.448276	0.410526			0.302766	0.447312	0.434238
PRKCZ	0.291045	0.419355	0.410526			0.368383	0.601896	0.583238
MAST1	0.291045	0.428571	0.410526			0.414931	0.717718	0.709199
TRPM5	0.291022	0.423423	0.41048			0.327604	0.506034	0.487219
PRX	0.291005	0.431373	0.410448			0.310141	0.46206	0.449572
GPR45	0.291005	0.44	0.410448			0.371369	0.602694	0.590759
RACGAP1	0.290909	0.470588	0.410256			0.319716	0.487805	0.469974
P2RX2	0.290909	0.438356	0.410256			0.327497	0.517073	0.486983
ICAM1	0.290909	0.432432	0.410256			0.328496	0.5	0.489194
GALNT2	0.290909	0.461538	0.410256			0.340674	0.533469	0.516699
TCF7L1	0.290909	0.421053	0.410256			0.365922	0.582222	0.577093
OBSCN	0.290885	0.432558	0.410208			0.454402	0.894595	0.832851
[truncated: 6,816 more rows]

## Sheet: Two-Sample t-Tests
Comparison of germline and somatic mutations													Null Hypothesis: mean1-mean2 = 0
		N	Mean	SD	SEM	Median			t Statistic	DF	Prob>|t|		Alternative Hypothesis: mean1-mean2 <> 0
fSg		8824	0.339	0.08118	0.000864163	0.32224		Equal Variance Assumed	85.7018	17646	0		At 0.05 level, when equal variance is assumed, Mean1 - Mean2 is significantly different from 0
fSs		8824	0.24604	0.06158	0.00065554	0.24564		Equal Variance NOT Assumed (Welch Correction)	85.7018	16451.3	0		At 0.05 level, when equal variance is NOT assumed, Mean1 - Mean2 is significantly different from 0
	Difference	8824	0.09296		0.00108	0.07948
	Overall	17648	0.29252	0.08574	0.00064539	0.28928
													Null Hypothesis: mean1-mean2 = 0
													Alternative Hypothesis: mean1-mean2 <> 0
fMg		8824	0.63771	0.08184	0.000871212	0.65672		Equal Variance Assumed	-66.0157	17646	0		At 0.05 level, when equal variance is assumed, Mean1 - Mean2 is significantly different from 0
fMs		8824	0.70727	0.05565	0.000592457	0.70801		Equal Variance NOT Assumed (Welch Correction)	-66.0157	15545.7	0		At 0.05 level, when equal variance is NOT assumed, Mean1 - Mean2 is significantly different from 0
	Difference	8824	-0.06955		0.00105	-0.05443
	Overall	17648	0.67249	0.07814	0.000588235	0.67946
													Null Hypothesis: mean1-mean2 = 0
													Alternative Hypothesis: mean1-mean2 <> 0
fNg		8824	0.02329	0.01578	0.000167943	0.02125		Equal Variance Assumed	-61.7856	17646	0		At 0.05 level, when equal variance is assumed, Mean1 - Mean2 is significantly different from 0
fNs		8824	0.04669	0.0319	0.000339562	0.04183		Equal Variance NOT Assumed (Welch Correction)	-61.7856	12895.8	0		At 0.05 level, when equal variance is NOT assumed, Mean1 - Mean2 is significantly different from 0
	Difference	8824	-0.02341		0.000378823	-0.01998
	Overall	17648	0.03499	0.02775	0.000208892	0.02935
													Null Hypothesis: mean1-mean2 = 0
													Alternative Hypothesis: mean1-mean2 <> 0
rSMg		8824	0.56572	0.33058	0.00352	0.48993		Equal Variance Assumed	56.1464	17646	0		At 0.05 level, when equal variance is assumed, Mean1 - Mean2 is significantly different from 0
rSMs		8824	0.35614	0.11688	0.00124	0.34615		Equal Variance NOT Assumed (Welch Correction)	56.1464	10994.9	0		At 0.05 level, when equal variance is NOT assumed, Mean1 - Mean2 is significantly different from 0
	Difference	8824	0.20958		0.00373	0.14831
	Overall	17648	0.46093	0.26917	0.00203	0.42477
													Null Hypothesis: mean1-mean2 = 0
									t Statistic	DF	Prob>|t|		Alternative Hypothesis: mean1-mean2 <> 0
rSMNg		8824	0.56332	0.72523	0.00772	0.47545		Equal Variance Assumed	29.1592	17646	1.33609e-182		At 0.05 level, when equal variance is assumed, Mean1 - Mean2 is significantly different from 0
rSMNs		8824	0.33547	0.11324	0.00121	0.32563		Equal Variance NOT Assumed (Welch Correction)	29.1592	9252.96	6.62347e-179		At 0.05 level, when equal variance is NOT assumed, Mean1 - Mean2 is significantly different from 0
	Difference	8824	0.22785		0.00781	0.15289
	Overall	17648	0.44939	0.53137	0.004	0.40702
													Null Hypothesis: mean1-mean2 = 0
Comparison of germline and somatic mutations									t Statistic	DF	Prob>|t|		Alternative Hypothesis: mean1-mean2 <> 0
fSg		8472	0.33831	0.08022	0.000871504	0.32152		Equal Variance Assumed	-6.00149	8813	2.03228e-09		At 0.05 level, when equal variance is assumed, Mean1 - Mean2 is significantly different from 0
fSg_CG_SO2SD_rSMN>0.5		343	0.36487	0.08314	0.00449	0.34938		Equal Variance NOT Assumed (Welch Correction)	-5.80651	368.243	1.37895e-08		At 0.05 level, when equal variance is NOT assumed, Mean1 - Mean2 is significantly different from 0
	Difference		-0.02655		0.00442
	Overall	8815	0.33935	0.08049	0.000857309	0.3224
													Null Hypothesis: mean1-mean2 = 0
									t Statistic	DF	Prob>|t|		Alternative Hypothesis: mean1-mean2 <> 0
rSMg		8460	0.56394	0.3265	0.00355	0.48833		Equal Variance Assumed	-4.23158	8803	2.34411e-05		At 0.05 level, when equal variance is assumed, Mean1 - Mean2 is significantly different from 0
rSMg_CG_SO2SD_rSMN>0.5		345	0.64054	0.39783	0.02142	0.55338		Equal Variance NOT Assumed (Welch Correction)	-3.52825	363.146	0.000471998		At 0.05 level, when equal variance is NOT assumed, Mean1 - Mean2 is significantly different from 0
	Difference		-0.0766		0.0181
	Overall	8805	0.56694	0.32989	0.00352	0.49029
													Null Hypothesis: mean1-mean2 = 0
													Alternative Hypothesis: mean1-mean2 <> 0
rSMNg		8472	0.56178	0.73653	0.008	0.47388		Equal Variance Assumed	-1.27689	8815	0.20167		At 0.05 level, when equal variance is assumed, Mean1 - Mean2 is NOT significantly different from 0
rSMNg_CG_SO2SD_rSMN>0.5		345	0.61264	0.3501	0.01885	0.53619		Equal Variance NOT Assumed (Welch Correction)	-2.48412	478.539	0.01333		At 0.05 level, when equal variance is NOT assumed, Mean1 - Mean2 is significantly different from 0
	Difference		-0.05087		0.03984
	Overall	8817	0.56377	0.72534	0.00772	0.47576
									t Statistic	DF	Prob>|t|		Alternative Hypothesis: mean1-mean2 <> 0
fSs		8472	0.24045	0.05568	0.000604937	0.24283		Equal Variance Assumed	-47.098	8813	0		At 0.05 level, when equal variance is assumed, Mean1 - Mean2 is significantly different from 0
fSs_rSMg_CG_SO2SD_rSMN>0.5		343	0.38322	0.03562	0.00192	0.37415		Equal Variance NOT Assumed (Welch Correction)	-70.8077	412.841	4.78032e-233		At 0.05 level, when equal variance is NOT assumed, Mean1 - Mean2 is significantly different from 0
	Difference		-0.14277		0.00303
	Overall	8815	0.24601	0.06157	0.000655816	0.24561
													Null Hypothesis: mean1-mean2 = 0
									t Statistic	DF	Prob>|t|		Alternative Hypothesis: mean1-mean2 <> 0
rSMs		8460	0.34375	0.09842	0.00107	0.34064		Equal Variance Assumed	-57.8752	8803	0		At 0.05 level, when equal variance is assumed, Mean1 - Mean2 is significantly different from 0
rSMs_CG_SO2SD_rSMN>0.5		345	0.66013	0.12376	0.00666	0.63366		Equal Variance NOT Assumed (Welch Correction)	-46.8842	361.963	7.84813e-156		At 0.05 level, when equal variance is NOT assumed, Mean1 - Mean2 is significantly different from 0
	Difference		-0.31638		0.00547
	Overall	8805	0.35615	0.11693	0.00125	0.34615
													Null Hypothesis: mean1-mean2 = 0
									t Statistic	DF	Prob>|t|		Alternative Hypothesis: mean1-mean2 <> 0
rSMNs		8472	0.32356	0.09574	0.00104	0.32071		Equal Variance Assumed	-57.272	8815	0		At 0.05 level, when equal variance is assumed, Mean1 - Mean2 is significantly different from 0
rSMNs_CG_SO2SD_rSMN>0.5		345	0.62774	0.11789	0.00635	0.59783		Equal Variance NOT Assumed (Welch Correction)	-47.2952	362.717	3.41087e-157		At 0.05 level, when equal variance is NOT assumed, Mean1 - Mean2 is significantly different from 0
	Difference		-0.30418		0.00531
	Overall	8817	0.33546	0.11327	0.00121	0.32558
													Null Hypothesis: mean1-mean2 = 0

## Sheet: Fig 10 Pearson's correlation
Statistics of data in Figure 10
		fSs	fSg				rSMs	rSMg				rSMNs	rSMNg
fSs	Pearson Corr.	1	0.1127		rSMs	Pearson Corr.	1	0.05757		rSMNs	Pearson Corr.	1	0.02635
fSs	p-value	--	2.44154e-26		rSMs	p-value	--	6.23305e-08		rSMNs	p-value	--	0.0133
fSg	Pearson Corr.	0.1127	1		rSMg	Pearson Corr.	0.05757	1		rSMNg	Pearson Corr.	0.02635	1
fSg	p-value	2.44154e-26	--		rSMg	p-value	6.23305e-08	--		rSMNg	p-value	0.0133	--

## Sheet: Fig 11 Pearson's correlation
Statistics of data in Figure 11
Gene symbol - Kegel	CRISPR score	rSMNg
JUN	-0.254751	0.672
A1CF	0.0537213	0.455319			N	Mean	SD	Sum	Min	Max
A2M	-0.0293096	0.436321		CRISPR score	8173	-0.09971	0.24577	-814.947	-1.56792	0.52698
A2ML1	0.137205	0.429508		rSMNg	8173	0.56673	0.75777	4631.87	0	45
A4GALT	-0.0368027	0.550685
AAAS	-0.412093	0.45
AACS	0.0444533	0.414516				CRISPR score	rSMNg
AADAC	0.0995417	0.388535		CRISPR score	Pearson Corr.	1	-0.03662
AADACL2	0.11449	0.366864		CRISPR score	p-value	--	0.000927957
AADACL3	-0.0286084	0.406504		rSMNg	Pearson Corr.	-0.03662	1
AADACL4	-0.0255086	0.314721		rSMNg	p-value	0.000927957	--
AAK1	-0.235787	0.509067
AARS2	-0.62359	0.394366		2-tailed test of significance is used
AASDH	-0.0502969	0.358306
AASS	0.104706	0.383382
AATK	-0.156253	0.560606
ABAT	-0.0440668	0.513825
ABCA1	-0.0417517	0.483424
ABCA10	0.171895	0.353975
ABCA12	-0.0786097	0.431818
ABCA13	0.00939175	0.358283
ABCA2	-0.0309576	0.675147
ABCA3	-0.0408866	0.513072
ABCA4	-0.0982962	0.384788
ABCA5	-0.0716352	0.343775
ABCA6	0.155246	0.325056
ABCA7	0.0446194	0.471286
ABCA8	-0.0299469	0.353721
ABCB1	-0.0624897	0.426678
ABCB10	-0.33263	0.513562
ABCB11	-0.0037693	0.423439
ABCB4	-0.0197015	0.444886
ABCB5	-0.018415	0.349575
ABCB6	-0.065429	0.474257
ABCB8	0.0519068	0.434074
ABCB9	-0.109068	0.482122
ABCC1	0.0269859	0.600328
ABCC10	-0.148364	0.464646
ABCC11	0.0878954	0.392966
ABCC12	0.0877906	0.398986
ABCC2	-0.0200206	0.368918
ABCC3	-0.20747	0.410293
ABCC4	0.0420977	0.503469
ABCC5	0.0911105	0.579125
ABCC6	-0.149672	0.437342
ABCC8	-0.00920569	0.530059
ABCC9	0.0150709	0.593458
ABCD2	0.0105057	0.504425
ABCD3	-0.124633	0.455446
ABCD4	-0.172462	0.512618
ABCE1	-0.858537	0.685446
ABCF1	-0.722031	0.471767
ABCF2	-0.143477	0.677054
ABCF3	0.0194997	0.481928
ABCG1	-0.409569	0.543964
ABCG2	0.107761	0.354331
ABCG4	-0.0188147	0.599532
ABCG5	-0.0146923	0.423878
ABCG8	-0.0164684	0.368
ABHD16A	-0.152253	0.574932
ABHD2	-0.120214	0.719665
ABHD8	-0.0537755	0.690763
ABI3	0.0396837	0.424084
ABI3BP	0.0889176	0.382184
ABL1	-0.0987531	0.599274
ABL2	0.144193	0.484615
ABLIM1	0.0263625	0.423462
ABLIM2	-0.000730749	0.525773
ABLIM3	0.068589	0.370943
ABR	-0.0534841	0.631455
ABRA	-0.103598	0.403458
ABTB1	0.0384692	0.491701
ABTB2	0.0395219	0.473441
ACACB	-0.0624504	0.466344
ACAD10	-0.0120511	0.397872
ACAD11	0.0425763	0.397626
ACAD9	-0.262372	0.410587
ACADS	-0.132077	0.434043
ACAN	0.0121827	0.430913
ACAP1	-0.162993	0.465451
ACAP2	0.0951507	0.485915
ACAP3	-0.166005	0.55962
ACBD3	-0.0774708	0.491803
ACBD5	0.0171187	0.449485
ACCS	0.0556813	0.424015
ACCSL	-0.0829979	0.420479
ACD	-0.404575	0.460462
ACE	-0.161798	0.494101
ACHE	-0.241876	0.635802
ACIN1	-0.633088	0.487347
ACKR3	0.0998234	0.765799
ACLY	-0.369733	0.531081
ACMSD	0.0804166	0.418367
ACO1	0.0798784	0.398256
ACO2	-0.498247	0.848714
ACOT11	-0.0373838	0.374359
ACOT12	-0.386027	0.37551
ACOX1	-0.117785	0.537815
ACOX2	-0.0477691	0.43617
ACOX3	-0.0324003	0.420721
ACOXL	-0.145336	0.417311
ACRBP	-0.0203484	0.419954
ACSBG1	0.0280147	0.540419
ACSBG2	-0.0730633	0.387324
ACSF2	-0.12466	0.489311
ACSF3	-0.0242552	0.425107
ACSL1	-0.0391035	0.511022
ACSL3	-0.372064	0.531401
ACSL5	0.0734851	0.421212
ACSL6	-0.0573711	0.510763
ACSM1	0.0741818	0.390244
ACSM3	-0.0724613	0.327223
ACSM4	0.076752	0.767372
ACSM5	0.0489472	0.426644
ACSS1	0.0529004	0.582888
ACSS2	0.196044	0.358696
ACSS3	0.0464954	0.392739
ACTA1	-0.249908	1.19545
ACTB	-0.601207	2.10638
ACTBL2	0.0214229	0.335092
ACTC1	0.11242	1.17617
ACTG1	-0.465809	1.66737
ACTG2	0.0348739	0.893491
ACTL6B	-0.0124107	0.875648
ACTL7A	-0.234912	0.419512
ACTL7B	-0.0453569	0.502336
ACTL8	-0.0858727	0.61512
ACTL9	-0.0614667	0.407489
ACTN1	-0.174654	0.520703
ACTN2	-0.113313	0.522293
ACTR1B	-0.453393	0.374517
ACTR5	-0.364276	0.446529
ACTR8	-0.789857	0.4
ACTRT2	0.0658947	0.528
ACVR1	0.0859827	0.586093
ACVR1B	-0.0718628	0.750973
ACVR1C	0.0852675	0.516129
ACVR2A	-0.0601983	0.68932
ACVR2B	0.131586	0.620968
ACVRL1	0.0316986	0.482105
ADAD1	0.00687104	0.390123
ADAD2	-0.0751831	0.512965
ADAM10	0.0139405	0.567935
ADAM11	-0.291155	0.580645
ADAM12	-0.0897646	0.476858
ADAM15	-0.0758082	0.446978
ADAM17	0.00864644	0.495641
ADAM18	0.0752429	0.357035
ADAM19	0.139175	0.450502
ADAM2	0.0492009	0.32782
ADAM20	0.0885904	0.330757
ADAM21	0.103633	0.456853
ADAM22	-0.0255358	0.449294
ADAM23	0.0349943	0.429542
ADAM28	0.112854	0.349186
ADAM29	0.126215	0.360208
ADAM30	-0.181372	0.401207
ADAM32	0.103111	0.345876
ADAM33	-0.0363839	0.482283
ADAM7	-0.0565102	0.338192
ADAM9	0.00299892	0.440698
ADAMDEC1	0.0695656	0.375
ADAMTS1	-0.0548306	0.444314
ADAMTS10	-0.196133	0.624419
ADAMTS12	0.0877007	0.393443
ADAMTS13	-0.0822654	0.406007
ADAMTS14	0.0441973	0.435038
ADAMTS15	-0.0624981	0.483429
ADAMTS16	0.0111205	0.436414
ADAMTS17	0.0788971	0.516057
ADAMTS18	0.0554674	0.425603
ADAMTS19	0.130281	0.444571
ADAMTS20	0.0277507	0.314492
ADAMTS3	-0.0638919	0.346774
ADAMTS4	-0.0654219	0.607107
ADAMTS5	0.070838	0.476132
ADAMTS6	-0.0153502	0.510606
ADAMTS7	-0.179247	0.518497
ADAMTS8	-0.0100047	0.472028
ADAMTS9	0.0405368	0.468099
ADAMTSL1	-0.0411496	0.45543
ADAMTSL2	-0.0446879	0.598143
ADAMTSL3	0.0748443	0.382591
ADAMTSL4	-0.131703	0.416522
ADAR	-0.320292	0.538976
ADARB1	-0.00863419	0.598309
ADARB2	0.054793	0.590288
ADAT1	-0.185408	0.352031
ADCK1	0.172506	0.383244
ADCK2	-0.107775	0.429091
ADCK5	-0.00451471	0.638601
ADCY1	0.098626	0.7616
ADCY10	0.0158435	0.410317
ADCY2	0.131153	0.671454
ADCY3	-0.294805	0.447162
ADCY4	-0.163319	0.489861
ADCY5	0.0925284	0.489967
ADCY6	0.0548639	0.491839
ADCY7	0.114721	0.584971
ADCY8	-0.0185129	0.527748
ADCY9	0.0165943	0.583333
ADCYAP1R1	-0.0705367	0.522599
ADD1	0.0750407	0.408037
ADD2	-0.0838268	0.56942
ADD3	0.026489	0.397727
ADH1A	0.0025015	0.401993
ADH1B	0.0195465	0.435967
ADH6	0.185546	0.37013
ADH7	0.038283	0.340686
ADHFE1	0.113321	0.388489
ADNP	-0.379106	22.6667
ADNP2	0.0611719	45
ADORA1	-0.0427496	0.568093
ADORA2A	-0.0638214	0.537736
ADORA3	-0.108965	0.481409
ADRA1A	0.184119	0.429539
ADRA1B	0.054804	0.490909
ADRA1D	0.00953639	0.469799
ADRA2A	-0.0393687	0.55611
ADRB2	-0.0561502	0.558824
ADSL	-0.831451	0.36342
AEBP1	-0.211092	0.446714
AFAP1	0.150978	0.485564
AFAP1L1	-0.0483735	0.436728
AFAP1L2	-0.0621786	0.49867
AFF3	-0.169909	0.492537
AFF4	-0.044072	0.465616
AFG3L2	-0.823521	0.485197
AFM	0.0192409	0.338828
AFP	-0.0352542	0.404255
AFTPH	-0.00871168	0.36
AGAP1	-0.136553	0.534987
AGAP2	-0.274118	0.48659
AGAP3	0.0500997	0.62844
AGBL1	0.0253799	0.413983
AGBL2	-0.0888218	0.376812
AGBL3	-0.0834603	0.382831
AGBL4	-0.268564	0.400786
AGBL5	-0.135094	0.458974
AGFG2	-0.194792	0.487871
AGGF1	0.0489634	0.414159
AGK	0.10234	0.412088
AGL	-0.116686	0.336589
AGMO	0.0364817	0.348718
AGPAT4	-0.0309942	0.594017
AGPS	-0.0150503	0.670846
AGRN	-0.219811	0.582157
AGT	-0.0543388	0.536998
AGTPBP1	0.212229	0.448316
AGTR1	-0.114202	0.442675
AGXT	-0.0768946	0.391837
AGXT2	-0.012897	0.356031
AHCTF1	-0.815857	0.37899
AHCY	-0.727579	0.543897
AHCYL2	-0.0354908	0.574526
AHDC1	-0.102744	0.574088
AHI1	-0.0604392	0.338561
AHNAK	-0.159183	0.394885
AHR	0.00340839	0.448505
AHSG	0.0294586	0.384401
AICDA	-0.0134869	0.516854
AIFM3	-0.177407	0.504912
AIM2	0.00487275	0.387097
AIPL1	-0.0646177	0.479218
AIRE	0.078872	0.450082
AJAP1	-0.0337182	0.52
AK5	0.00368917	0.565826
AK7	-0.0921714	0.353891
AK8	-0.0810224	0.483589
AKAP1	0.029976	0.463704
AKAP11	0.0338001	0.398262
AKAP12	-0.027956	0.423105
AKAP13	-0.0393931	0.395793
AKAP3	-0.0226607	0.368571
AKAP6	-0.0631278	0.368879
AKAP8	-0.0685812	0.445731
AKAP8L	-0.115462	0.490654
AKAP9	0.0035217	0.354251
AKNA	-0.0574923	0.408953
AKNAD1	0.0126951	0.317529
AKR1D1	-0.0183218	0.40856
AKT1	-0.0339915	0.907336
AKT3	0.0952992	0.833333
ALAS1	-0.125096	0.485477
ALB	0.0544077	0.51215
ALCAM	-0.0160582	0.492574
ALDH16A1	-0.0438397	0.452503
ALDH18A1	-0.295984	0.463277
ALDH1A1	0.00535005	0.561514
ALDH1A2	-0.00983242	0.513228
ALDH1A3	0.118481	0.608025
ALDH1B1	-0.0630191	0.42515
ALDH1L1	-0.096726	0.478589
ALDH1L2	0.0276145	0.410296
ALDH2	-0.0459726	0.562347
ALDH3A1	-0.104595	0.448171
ALDH3B2	-0.12549	0.418014
ALDH4A1	-0.0527987	0.551167
ALDH5A1	-0.0514768	0.466019
ALDH6A1	-0.129304	0.417582
ALDH8A1	-0.0843163	0.453865
ALDOB	-0.0363949	0.491139
ALG1	-0.824929	0.482507
ALG9	-0.123935	0.469957
ALK	-0.135704	0.483969
ALKBH8	-0.0118025	0.367063
ALLC	-0.06559	0.405405
ALOX12	0.0630753	0.44
ALOX12B	0.0173806	0.454064
ALOX15	-0.119691	0.479407
ALOX15B	0.100686	0.446841
ALOX5	-0.0909945	0.501684
ALOXE3	-0.147226	0.419976
ALPI	0.197524	0.499051
ALPK1	0.0140059	0.367837
ALPK2	0.0804129	0.406587
ALPK3	0.0686905	0.42339
ALPL	0.017165	0.513978
ALPP	0.0728604	0.42811
ALS2	0.122553	0.41723
ALS2CL	-0.0307384	0.477895
ALX1	-0.130233	0.362007
ALX4	-0.113867	0.57072
AMACR	0.0341486	0.407692
AMBN	-0.0653375	0.345154
AMBP	-0.114115	0.380368
AMBRA1	-0.12761	0.492616
AMDHD1	-0.0571487	0.393407
AMDHD2	-0.00848929	0.56894
AMFR	-0.221458	0.472406
AMHR2	-0.0699991	0.44316
AMIGO2	0.0833291	0.504478
AMOTL1	0.0218158	0.45375
AMOTL2	0.0552783	0.444744
AMPD1	-0.0436439	0.336735
AMPD2	0.00765574	0.573034
AMPD3	-0.0317505	0.458671
AMPH	-0.0195609	0.404188
AMZ1	-0.120485	0.503497
ANAPC1	-0.777561	0.450886
ANAPC2	-1.05501	0.620388
ANAPC4	-1.03919	0.478261
ANAPC5	-0.732751	0.556277
ANAPC7	-0.146248	0.534884
ANGEL1	-0.05451	0.44186
ANGPT1	-0.00736911	0.443366
ANGPT2	-0.0287763	0.517084
ANGPT4	0.245547	0.445415
ANGPTL1	0.0198663	1.01587
ANGPTL2	0.0669805	0.506562
ANGPTL4	-0.0144197	0.458738
ANGPTL5	0.0703583	0.274232
ANK1	0.0573856	0.543004
ANK2	0.108002	0.436647
ANK3	-0.019693	0.476237
ANKAR	0.110907	0.365597
ANKFN1	-0.0202213	0.403226
ANKFY1	-0.0702279	0.542222
ANKH	-0.112873	0.709677
ANKIB1	-0.0686053	0.447195
ANKK1	-0.012771	0.42561
ANKLE1	-0.154623	0.45388
ANKLE2	-1.41065	0.479627
ANKMY1	0.0802095	0.431834
ANKRD11	-0.413079	0.558098
ANKRD12	0.00968136	0.423077
ANKRD13B	0.123221	0.549327
ANKRD13C	-0.0462911	0.516393
ANKRD13D	0.0646039	0.506116
ANKRD17	-0.291535	0.622583
ANKRD18A	0.0547716	0.345041
ANKRD24	-0.226701	0.450536
ANKRD26	0.165709	0.351198
ANKRD27	-0.00169325	0.482363
ANKRD28	0.118878	0.0814696
ANKRD30A	-0.0329647	0.35493
ANKRD30B	-0.0357959	0.367377
ANKRD31	-0.261798	0.323944
ANKRD33	-0.0774469	0.45935
ANKRD34A	-0.122366	0.605769
ANKRD34B	-0.0737803	0.347607
ANKRD34C	0.0235372	0.5
ANKRD35	-0.154462	0.418681
ANKRD44	-0.056142	0.467123
ANKRD50	-0.00742914	0.459839
ANKRD52	-0.189165	0.690967
ANKRD55	-0.0358992	0.387211
ANKRD6	-0.013336	0.40146
ANKS1A	0.0641389	0.574516
ANKS1B	0.0711991	0.530184
ANKS3	-0.102173	0.468912
ANKS4B	0.0376856	0.424561
ANKS6	-0.50503	0.413119
ANKZF1	-0.0670456	0.402632
ANLN	-0.514187	0.338462
ANO1	-0.068328	0.561427
ANO10	0.153684	0.375987
ANO3	0.0661774	0.454683
ANO4	-0.116366	0.413102
ANO5	-0.0280801	0.36398
ANO6	-0.0191855	0.412903
ANO7	0.0350952	0.50256
ANO8	-0.00344756	0.691005
ANO9	0.0859443	0.489228
ANPEP	-0.0612798	0
ANTXR1	0.0273985	0.565909
ANTXR2	0.107364	0.389671
ANXA10	0.0169705	0.393382
ANXA13	-0.00524521	0.420455
ANXA6	-0.0543834	0.422535
AOAH	0.204916	0.415064
AOC2	-0.176535	0.40327
AOC3	-0.185771	0.472574
AOX1	0.088615	0.365979
AP1B1	-0.0973865	0.697324
AP1G1	-0.139986	0.570213
AP1G2	-0.311606	0.418681
AP1M1	-0.138566	0.930348
AP2A1	-0.0604238	0.686731
AP2A2	0.195432	0.683502
AP2M1	-0.652409	1.48624
AP3B1	-0.228523	0.383226
AP3B2	-0.0346436	0.516939
AP3D1	-0.0409754	0.596639
AP4B1	0.00986286	0.383978
AP4E1	-0.060259	0.417964
AP4M1	0.0848369	0.487915
AP5B1	-0.0461919	0.527192
APAF1	-0.0592905	0.41412
APBA1	-0.0276456	0.594436
APBA2	-0.0617122	0.56229
APBB1	-0.0918325	0.499096
APBB1IP	0.070676	0.51927
APBB2	0.0244206	0.544747
APBB3	-0.0757398	0.474638
APC	-0.379347	0.3549
APC2	-0.147369	0.545605
APCDD1	0.160716	0.469159
APCDD1L	0.120166	0.464088
APCS	-0.151453	0.454955
APEH	-0.146275	0.462411
APLNR	-0.160597	0.58006
APLP1	-0.159584	0.540037
APLP2	0.119247	0.388732
APOA4	0.0636504	0.441379
APOA5	-0.0483885	0.429054
APOB	0.118989	0.405036
APOBR	-0.0520853	0.451243
APOH	0.00282142	0.359773
APOL5	-0.0766671	0.395181
APP	-0.0136409	0.461412
APPBP2	0.0156767	0.716667
APPL1	0.0142046	0.360568
APPL2	0.116047	0.401869
AQP10	-0.18347	0.599303
AQP7	-0.741613	0.410628
AQP8	0.0633583	0.527363
AQR	-0.827945	0.518892
ARAP1	-0.0452083	0.519263
ARAP2	0.106234	0.336123
ARAP3	0.0551227	0.449631
ARC	0.099175	0.665517
ARFGAP2	-0.112572	0.397135
ARFGEF1	-0.113969	0.603985
ARFGEF2	-0.0325113	0.465753
ARHGAP10	0.167733	0.414003
ARHGAP12	0.0265487	0.405272
ARHGAP15	-0.0194063	0.364606
ARHGAP17	0.0361227	0.461201
ARHGAP18	0.0729921	0.396296
ARHGAP20	0.121648	0.41924
ARHGAP21	-0.00764054	0.462491
ARHGAP22	0.0165699	0.459345
ARHGAP24	0.104171	0.396605
ARHGAP25	-0.0496795	0.392405
ARHGAP26	0.129125	0.537242
ARHGAP27	-0.0906228	0.492834
ARHGAP28	0.0728195	0.432079
ARHGAP29	-0.108721	0.37193
ARHGAP30	-0.00815451	0.42477
ARHGAP31	-0.0457217	0.423729
ARHGAP32	0.0986555	0.462687
ARHGAP33	-0.0551988	0.525883
ARHGAP35	0.242707	0.54902
ARHGAP39	0.00814037	0.557904
ARHGAP44	0.205066	0.643123
ARHGAP5	-0.149916	0.474916
ARHGAP9	-0.286152	0.390997
ARHGEF1	-0.0359215	0.541728
ARHGEF10	0.0521705	0.4379
ARHGEF10L	0.0141715	0.55157
ARHGEF11	-0.205348	0.419395
ARHGEF12	0.0815312	0.43785
ARHGEF15	0.0121038	0.448669
ARHGEF16	-0.120966	0.495342
ARHGEF17	-0.0299484	0.47619
ARHGEF18	0.0688123	0.51067
ARHGEF19	-0.0920313	0.433471
ARHGEF2	-0.10853	0.562238
ARHGEF25	-0.082797	0.440594
ARHGEF26	-0.044597	0.438293
ARHGEF3	0.01514	0.470305
ARHGEF33	-0.158317	0.495833
ARHGEF37	0.0902775	0.353226
ARHGEF4	0.0125714	0.450278
ARHGEF40	-0.154515	0.464502
ARHGEF5	-0.137545	0.355343
ARHGEF7	-0.420369	0.603419
ARID1A	-0.266499	0.58481
ARID1B	-0.137673	0.422977
ARID2	-0.334027	0.513369
ARID3A	-0.39002	0.637765
ARID3B	-0.217609	0.49635
ARID3C	-0.19324	0.371019
ARID4A	-0.0198295	0.41452
ARID4B	-0.12513	0.4075
ARID5A	-0.18055	0.517103
ARID5B	-0.0543159	0.526596
ARIH2	0.0546799	0.708155
ARMC2	-0.0134232	0.480663
ARMC3	0.0532615	0.329004
ARMC4	0.0419372	0.38412
ARMC5	-0.372619	0.570621
ARMC6	-0.378916	0.431767
ARMC8	0.0834444	0.555035
ARMC9	-0.0266604	0.455752
ARNT	-0.00703284	0.474286
ARNT2	0.0689902	0.518908
ARNTL	-0.130859	0.527322
ARNTL2	-0.103869	0.359343
ARPP21	0.0944034	0.415584
ARRB1	-0.120014	0.635762
ARSB	-0.118607	0.369792
ARSG	0.241814	0.486667
ARSI	-0.211579	0.440546
ARSJ	0.0828698	0.477855
ARVCF	-0.0954651	0.458584
ASAP1	0.084672	0.625
ASAP2	0.128205	0.562582
ASAP3	-0.100074	0.409857
ASB10	-0.0758966	0.435897
ASB15	0.216804	0.364486
ASB17	-0.0399191	0.384956
ASB2	0.186543	0.471125
ASB4	0.149604	0.379653
ASB5	0.0770611	0.407051
ASCC2	0.0178176	0.430556
ASH1L	-0.177752	0.434387
ASH2L	-0.309274	0.516949
ASL	-0.181662	0.513648
ASNS	-0.285966	0.371728
ASNSD1	-0.125174	0.37406
ASPG	0.0385742	0.512821
ASPH	0.169872	0.384896
ASPHD1	-0.141448	0.527704
ASPM	-0.34648	0.343644
ASPRV1	-0.168063	0.505085
ASPSCR1	-0.244808	0.493421
ASS1	-0.293219	0.506849
ASTE1	-0.00279548	0.44697
ASTL	-0.100016	0.420668
ASTN1	-0.0370976	0.47053
ASTN2	-0.018009	0.522232
ASXL1	-0.034917	0.409692
ASXL3	0.056931	0.408962
ASZ1	-0.120406	0.325815
ATAD2	-0.0429443	0.44898
ATAD5	-0.1245	0.379581
ATCAY	-0.178943	0.606498
ATE1	-0.0154528	0.4859
ATF2	0.135263	0.556391
ATF6	-0.0945492	0.436567
ATF6B	-0.202209	0.427785
ATF7	-0.110608	0.501511
ATF7IP	-0.0955965	0.417894
ATG14	-0.111737	0.400932
ATG16L1	-0.056164	0.579096
ATG2A	-0.281681	0.504968
ATG2B	0.0965591	0.416447
ATG4D	-0.187144	0.429752
ATG7	0.0603726	0.517598
ATG9A	-0.189552	0.609407
ATIC	-0.40124	0.39011
ATL1	-0.0531492	0.530159
ATM	-0.031332	0.350008
ATMIN	-0.311635	0.434599
ATN1	-0.206171	0.501444
ATP10A	0.00891998	0.491649
ATP10B	-0.0163684	0.386427
ATP10D	0.0107843	0.388385
ATP11A	0.00438098	0.514451
ATP11B	0.0405641	0.455774
ATP12A	-0.0204714	0.463145
ATP13A1	-0.241152	0.609407
ATP13A2	-0.118427	0.516696
ATP13A3	-0.114746	0.475795
ATP13A4	-0.0345733	0.382353
ATP13A5	0.0760402	0.368598
ATP1A1	-1.05289	1.33546
ATP1A2	0.0726725	0.776699
ATP1A3	-0.145669	0.93913
ATP1A4	0.0520342	0.450399
ATP2A1	-0.0768138	0.614103
ATP2A2	-1.13073	1.16136
ATP2A3	-0.0665538	0.623469
ATP2B1	-0.149292	0.635438
ATP2B2	-0.0374697	0.843081
ATP2B4	-0.238974	0.49238
ATP2C1	-0.15801	0.525617
ATP2C2	-0.0501309	0.426781
ATP4A	-0.0333943	0.580132
ATP6V0A1	-0.191109	0.623894
ATP6V0A2	-0.132356	0.458894
ATP6V0A4	-0.0555063	0.456311
ATP6V0D2	0.0921636	0.361963
ATP6V1A	-1.16466	0.556667
ATP6V1B1	-0.0788132	0.418426
ATP6V1B2	-1.3537	0.656566
ATP6V1C2	0.0623255	0.466667
ATP6V1H	-0.560563	0.375
ATP7B	0.0354641	0.36423
ATP8A1	0.0633132	0.542151
ATP8A2	-0.0837559	0.475862
ATP8B1	0.092672	0.452563
ATP8B2	0.0126251	0.517835
ATP8B3	-0.0721966	0.446389
ATP8B4	0.175937	0.351404
ATP9A	-0.0784986	0.7691
ATP9B	-0.0612534	0.449926
ATR	-0.720587	0.495264
ATRIP	-0.568273	0.488215
ATRN	-0.0901219	0.497863
ATRNL1	0.159862	0.4273
ATXN1	-0.0660921	0.604271
ATXN2	-0.0740759	0.475159
ATXN2L	-0.107581	0.606264
ATXN7	0.11556	0.430478
ATXN7L1	0.0561622	0.472643
ATXN7L2	-0.0889924	0.496241
AURKA	-0.924717	0.536398
AURKB	-1.10783	0.459627
AURKC	-0.0460692	0.423729
AUTS2	-0.108704	0.54226
AVIL	-0.151903	0.38041
AVPR1A	-0.138534	0.434568
AVPR1B	-0.104464	0.411905
AXDND1	-0.108918	0.39403
AXIN1	0.000455	0.577699
AXIN2	-0.0266244	0.495211
AXL	-0.0979449	0.477654
AZGP1	-0.101751	0.380952
B2M	-0.0119468	0.433962
B3GALT1	-0.0672001	0.553763
B3GAT1	0.0614192	0.689394
B3GAT2	-0.13501	0.402314
B3GNT3	-0.285018	0.523649
B3GNT7	0.0349578	0.528024
B3GNT9	-0.1301	0.574118
B3GNTL1	0.0621101	0.552684
B4GALNT1	-0.101185	0.446316
B4GALNT2	-0.109056	0.421687
B4GALNT3	-0.101925	0.45892
B4GALNT4	-0.0374077	0.619507
B4GALT5	-0.100988	0.635514
BAAT	0.0682926	0.363636
BACE1	-0.142374	0.469543
BACE2	0.00283984	0.551724
BACH1	0.121961	0.403131
BACH2	0.0387641	0.599641
BAG3	-0.0967046	0.385852
BAG6	-0.160635	0.4846
BAHD1	-0.0908579	0.470499
BAIAP2	-0.130292	0.712803
BAIAP2L1	-0.0246919	0.434968
BAIAP3	-0.179236	0.459119
BANK1	-0.0523007	0.341985
BANP	-0.718554	0.741007
BAP1	-0.516851	0.555249
BARD1	-0.60223	0.366715
BARHL1	-0.115915	0.583969
BARHL2	-0.176532	0.495601
BASP1	0.274056	0.476
BAZ1A	-0.0835155	0.448619
BAZ1B	-0.270267	0.560099
BAZ2A	-0.0385399	0.424874
BAZ2B	0.093519	0.395187
BBS1	-0.233496	0.421444
BBS10	0.0701775	0.315705
BBS12	0.0961294	0.394881
BBS2	0.0249349	0.417249
BBS7	0.0450659	0.356
BBS9	-0.209124	0.398639
BBX	0.00763126	0.475806
BCAM	-0.00464062	0.480499
BCAN	-0.306827	0.438017
BCAR1	-0.598567	0.531915
BCAR3	-0.00739853	0.40882
BCAS1	0.0713574	0.381041
BCAS3	-0.215895	0.452412
BCAT1	0.043418	0.344388
BCAT2	0.0593403	0.489552
BCHE	0.0355009	0.24633
BCKDHA	0.00742191	0.458621
BCKDK	-0.10265	0.497382
BCL11A	-0.111518	0.664384
BCL11B	0.0523312	0.909548
BCL2	-0.0481742	0.706806
BCL2L12	-0.133516	0.470842
BCL6	-0.0400401	0.508264
BCL6B	-0.0342437	0.53317
BCL9L	-0.205228	0.511677
BCLAF1	-0.737334	0.378641
BCO2	0.0421273	0.325
BCR	0.0236943	0.536141
BDKRB1	0.0775591	0.465347
BDKRB2	-0.0385385	0.526946
BDP1	-0.619674	0.390197
BEGAIN	-0.13429	0.650467
BEND3	-0.229888	0.607256
BEND4	-0.0897205	0.484029
BEND5	0.0327872	0.58256
BEST2	-0.0667075	0.560268
BEST3	-0.105871	0.413357
BFSP1	0.00688354	0.421233
BFSP2	0.083099	0.412256
BHMT	-0.0520471	0.507205
BICC1	0.0277413	0.434729
BICD1	-0.158153	0.498563
BICD2	-0.184394	0.582222
BIN1	-0.186979	0.608225
BIN2	-0.130732	0.43026
BIRC2	-0.163392	0.404762
BIRC3	0.0970709	0.414097
BIRC6	-0.282185	0.482339
BIVM	0.0636607	0.400901
BLK	-0.0137454	0.434316
BLM	-0.170168	0.37907
BLNK	-0.0223215	0.489051
BMP1	-6.4329e-05	0.481986
BMP10	-0.0508154	0.519031
BMP2	0.0362463	0.568493
BMP2K	0.0250981	0.363284
BMP3	0.0977323	0.411905
BMP4	0.0358637	0.447514
BMP5	-0.042071	0.407008
BMP6	-0.0450068	0.503018
BMP7	0.0555156	0.57606
BMPER	0.0461558	0.411074
BMPR1A	-0.130153	0.401007
BMPR1B	0.101895	0.367442
BMPR2	0.0111405	0.318236
BMS1	-0.925849	0.404717
BNC1	-0.0623041	0.426862
BNC2	0.0487207	0.465347
BOC	-0.0736939	0.494658
BPI	0.0770737	0.38403
BPIFB4	-0.112758	0.449587
BPTF	-0.311465	0.498901
BRAF	-0.16157	0.495726
BRAP	-0.156109	0.485477
BRAT1	-0.427405	0.518738
BRCA1	-0.467928	0.297019
BRCA2	-0.565548	0.304301
BRD1	-0.233876	0.642539
BRD3	0.122679	0.739308
BRD4	-0.836564	0.66789
BRD7	-0.167449	0.411405
BRD8	-0.40217	0.479655
BRD9	0.0183716	0.546635
BRDT	-0.0612476	0.367232
BRF1	-0.793787	0.559115
BRIP1	-0.366682	0.361208
BRPF1	-0.307848	0.622819
BRPF3	-0.0535473	0.523869
BRWD1	-0.0852893	0.431258
BSG	-0.137497	0.638498
BSN	-0.0340853	0.453839
BSND	-0.138432	0.44523
BTAF1	-0.325733	0.543223
BTBD11	-0.142266	0.51663
BTBD16	0.0540754	0.461874
BTBD17	-0.262345	0.581114
BTBD2	0.021248	0.72912
BTBD3	-0.0696353	0.543807
BTBD7	-0.0446653	0.435698
BTBD9	-0.266417	0.467626
BTN1A1	-0.0699757	0.411311
BTN3A1	0.116952	0.346939
BTN3A3	0.0789392	0.418605
BTNL3	-0.0191032	0.412088
BTNL8	-0.0663314	0.386503
BTNL9	0.0928951	0.455696
BTRC	-0.0123695	0.495614
BUB1	-0.579646	0.37367
BUB1B	-1.12386	0.397959
BUD13	-0.625319	0.342014
BVES	-0.0469409	0.370107
C10orf120	0.0899753	0.315287
C10orf71	0.271171	0.400644
C10orf90	-0.0629642	0.379665
C11orf80	-0.119601	0.487859
C12orf4	-0.0168618	0.359116
C12orf40	0.200557	0.326979
C12orf42	-0.0143922	0.373796
C12orf50	-0.0182021	0.35
C12orf56	-0.24913	0.417795
C14orf39	0.0767974	0.352342
C15orf39	-0.0870683	0.459091
C16orf46	-0.179626	0.36534
C16orf71	0.0299879	0.384425
C16orf78	0.0783925	0.316981
C16orf89	-0.124316	0.433086
C16orf96	-0.14717	0.36555
C17orf80	0.0158359	0.532468
C19orf44	-0.147039	0.411765
C19orf57	-0.0803209	0.431078
C1orf112	-0.0415529	0.372898
C1orf116	-0.0363963	0.340716
C1orf127	-0.233874	0.396529
C1orf141	0.0274918	0.383152
C1orf87	-0.0255565	0.40305
C1orf94	0.0718677	0.426945
C1QTNF2	-0.0412639	0.417827
C1RL	0.0994801	0.462185
C1S	-0.0182113	0.438134
C2	-0.0501286	0.494845
C20orf194	-0.0343827	0.436054
C2CD2	0.000784692	0.573451
C2CD2L	0.0647569	0.444238
C2CD3	-0.0239814	0.404311
C2orf16	-0.015265	0.363803
C2orf42	-0.0813794	0.444717
C2orf78	-0.114057	0.350275
C3	0.00219365	0.675199
C3AR1	-0.020787	0.364078
C3orf20	-0.113616	0.381839
C4BPA	0.0803616	0.494898
C5	0.000237452	0.392238
C5AR1	-0.0656945	0.504505
C5orf34	-0.0359119	0.328302
C6	0.0628859	0.403608
C6orf118	-0.018965	0.42126
C7	0.26057	0.377238
C7orf31	0.0731185	0.299445
C8A	0.106048	0.355848
C8B	0.119668	0.386986
C8orf34	0.0661602	0.381944
C9	-0.0135699	0.343808
C9orf131	-0.115998	0.356695
C9orf43	0.00710002	0.412913
C9orf50	-0.0759174	1.115
CA10	-0.12738	0.506977
CA4	-0.127132	0.471154
CA8	-0.0704435	0.530806
CABIN1	-0.169404	0.474203
CABP4	-0.278898	0.475066
CABS1	0.0311237	0.355742
CACHD1	-0.0227098	0.408759
CACNA1A	-0.177377	0.5869
CACNA1B	-0.101236	0.51382
CACNA1C	0.0137145	0.586645
CACNA1D	-0.0380417	0.589764
CACNA1E	-0.00227987	0.626004
CACNA1G	-0.22793	0.619963
CACNA1H	-0.0444817	0.559917
CACNA1I	-0.0563373	0.667971
CACNA1S	-0.0287517	0.414152
CACNA2D1	-0.039475	0.376667
CACNA2D2	-0.0800344	0.517871
CACNA2D3	0.0356149	0.406412
CACNA2D4	0.0140111	0.38806
CACNB1	-0.1982	0.498016
CACNB2	0.0350779	0.463768
CACNB3	-0.474629	0.52454
CACNB4	0.0710693	0.390588
CACNG2	-0.054042	0.595122
CACNG3	-0.0325403	0.898734
CACNG4	-0.0661065	0.651584
CACNG5	0.122005	0.465306
CACNG7	0.284083	0.553571
CACNG8	0.111459	0.919492
CAD	-0.304596	0.517889
CADM1	-0.0760469	0.636646
CADM2	-0.0240846	0.64684
CADM3	0.0614566	0.590323
CADPS	-0.00372915	0.595212
CADPS2	-0.0139084	0.438503
CAGE1	0.10938	0.413146
CALB2	0.217853	0.480519
CALCOCO1	-0.212828	0.453488
CALCR	0.0643333	0.383562
CALCRL	-9.80245e-05	0.460377
CALD1	0.178504	0.350711
CALN1	-0.200752	0.554054
CALR	-0.184292	0.647059
CALR3	-0.0398869	0.407595
CAMK1D	-0.0514294	0.758929
CAMK1G	0.0629078	0.609375
CAMK2A	0.0113078	1.12025
CAMK2B	0.0610271	0.812968
CAMK2G	-0.0894422	0.643229
CAMK4	0.00504857	0.521036
CAMKK1	-0.0399015	0.508584
CAMKK2	-0.269655	0.534653
CAMKV	0.0285227	0.804979
CAMSAP1	-0.0997069	0.535599
CAMSAP2	-0.128396	0.39627
CAMSAP3	-0.011589	0.605817
CAMTA1	-0.00257279	0.508327
CAMTA2	-0.0713423	0.47679
CAND1	-0.358284	0.648551
CAND2	-0.0714252	0.509769
CANT1	-0.137785	0.472868
CANX	-0.0780732	0.46733
CAP2	0.129543	0.427326
CAPN1	-0.164257	0.444073
CAPN10	-0.0320552	0.549114
CAPN11	-0.0965499	0.388467
CAPN12	0.0322332	0.459242
CAPN13	-0.0398408	0.392126
CAPN14	0.127027	0.401786
CAPN2	0.0037176	0.436817
CAPN3	-0.139178	0.396966
CAPN5	-0.147962	0.44026
CAPN7	0.0816389	0.421405
CAPN9	-0.261171	0.376947
CAPRIN1	-0.125986	0.451143
CAPRIN2	0.00223966	0.424641
CAPS2	0.0452118	0.361638
CAPSL	0.0769641	0.367257
CARD10	-0.233386	0.540189
CARD11	-0.185358	0.727038
CARD14	0.075393	0.507307
CARD6	-0.0902434	0.29849
CARD8	-0.139447	0.473573
CARD9	0.0386353	0.508949
CARM1	-0.283806	0.750567
CARNS1	-0.132734	0.474971
CARS2	-0.361794	0.4653
CASC1	0.0772018	0.43021
CASC3	-0.332592	0.413408
CASD1	0.0873292	0.430799
CASKIN1	-0.154585	0.605828
CASKIN2	-0.131385	0.474359
CASP2	0.199181	0.409241
CASP8	0.0627098	0.425121
CASQ1	-0.0510683	0.380531
CASQ2	-0.186801	0.411932
CASR	-0.0532213	0.547085
CASS4	-0.152281	0.490969
CAST	-0.233888	0.369902
CASZ1	-0.247027	0.578947
CATSPER1	-0.133236	0.428144
CATSPER2	-0.00241341	0.380658
CATSPER3	-0.223273	0.39697
CATSPER4	0.0405024	0.424837
CATSPERB	0.127899	0.362595
CATSPERG	-0.136389	0.46797
CBFA2T2	0.103881	0.560748
CBFA2T3	0.0115373	0.452703
CBFB	-0.206095	0.678261
CBL	0.0264828	0.448324
CBLB	0.0338752	0.476728
CBLC	-0.0893594	0.470588
CBLL1	-0.454318	0.505348
CBLN2	-0.0447795	0.758865
CBLN4	0.0698837	0.68
CBS	-0.0320093	0.525597
CBX2	-0.0175115	0.52132
CBX4	0.0214257	0.579176
CBX6	0.0329332	0.640719
CBX8	0.0802646	0.649682
CC2D1A	0.0713912	0.470455
CC2D1B	-0.128103	0.387755
CC2D2A	-0.00716058	0.369754
CCAR1	-0.635949	0.488333
CCBE1	-0.0140923	0.476091
CCDC102A	-0.0921348	0.451799
CCDC102B	0.0955085	0.301708
CCDC105	-0.10987	0.433936
CCDC110	0.0531813	0.307914
CCDC114	-0.26504	0.415152
CCDC116	-0.0685469	0.383905
CCDC13	0.0320287	0.394649
CCDC136	0.0550545	0.42329
CCDC138	-0.0532075	0.422512
CCDC14	-0.0448041	0.355757
CCDC144A	-0.332667	0.39001
CCDC146	0.0556325	0.375668
CCDC148	0.105179	0.358974
CCDC15	0.111774	0.311938
CCDC150	0.0785429	0.382911
CCDC151	-0.0153868	0.454545
CCDC157	0.0646183	0.450565
CCDC158	-0.000571869	0.35
CCDC166	-0.0244308	0.474576
CCDC175	0.053146	0.389507
CCDC27	-0.0956857	0.430573
CCDC28A	0.0959797	0.405063
CCDC30	-0.245321	0.446259
CCDC33	-0.0227889	0.396262
CCDC38	-0.143744	0.385246
CCDC39	-0.0448201	0.334104
CCDC40	0.0246276	0.418528
CCDC50	-0.0269626	0.431655
CCDC54	0.235639	0.315217
CCDC6	-0.190446	0.697872
CCDC60	0.0289259	0.348101
CCDC61	-0.0877192	0.390947
CCDC62	-0.181104	0.395303
CCDC63	-0.10635	0.373444
CCDC66	0.0503301	0.326644
CCDC68	0.169993	0.375479
CCDC73	0.082079	0.375
CCDC8	-0.0846461	0.40585
CCDC80	0.000528669	0.402778
CCDC81	-0.0310729	0.326214
CCDC82	0.193456	0.371608
CCDC83	-0.10136	0.330667
CCDC85A	0.0037289	0.456464
CCDC87	-0.189168	0.440975
CCDC88A	-0.0829563	0.460396
CCDC88B	-0.191875	0.459906
CCDC88C	0.0352019	0.47103
CCDC9	-0.120665	0.42053
CCDC93	-0.161705	0.433099
CCDC96	-0.0474382	0.43956
CCHCR1	0.0921177	0.376376
CCIN	-0.14697	0.474178
CCKAR	0.024962	0.407407
CCKBR	-0.0450135	0.399628
CCM2	-0.0831745	0.533175
CCNA1	-0.0118368	0.48265
CCND1	-0.792697	0.691943
CCND2	-0.14153	0.792453
CCND3	-0.261579	0.579545
CCNE1	-0.118027	0.592308
CCNF	-0.11525	0.490937
CCNJL	-0.0014079	0.488189
CCNL1	-0.491699	0.592593
CCNL2	-0.268193	0.528814
CCNT1	-0.153303	0.466135
CCNT2	-0.122939	0.482255
CCP110	-0.380979	0.381526
CCPG1	0.00298686	0.389877
CCR3	-0.179599	0.458924
CCR4	-0.0949246	0.596567
CCR6	0.00370672	0.673267
CCR7	-0.058398	0.665198
CCR9	0.0803901	0.441558
CCSER2	0.194799	0.352477
CCT3	-1.45359	0.40708
CCT5	-0.823497	0.506053
CCT6A	-0.714606	0.522184
CCT6B	-0.11131	0.411683
CCT7	-0.44206	0.628986
CCT8	-0.754484	0.458564
CCT8L2	-3.5183e-05	0.461538
CD101	-0.254904	0.408383
CD109	0.00955145	0.360573
CD163	0.0529327	0.452261
CD163L1	0.189633	0.360544
CD180	-0.0282098	0.401152
CD19	-0.0268089	0.507075
CD1A	0.096992	0.404255
CD1B	0.066168	0.393204
CD1C	-0.0842945	0.364407
CD1D	-0.265966	0.425325
CD1E	0.00767676	0.428184
CD2	0.115325	0.414239
CD200R1L	-0.0951336	0.429825
CD209	-0.0819564	0.380054
CD22	-0.0317546	0.492647
CD226	0.195749	0.397727
CD248	-0.0407351	0.495238
CD276	-0.092809	0.52381
CD2AP	0.145747	0.383673
CD300LG	-0.0879783	0.422096
CD36	0.00572037	0.254186
CD4	-0.00891923	0.497207
CD44	-0.0190462	0.41994
CD5	-0.250837	0.466667
CD5L	-0.116001	0.415625
CD6	-0.0917375	0.532258
CD79B	-0.0732922	0.710345
CD84	0.127773	0.386861
CD86	0.0439522	0.370968
CD93	0.000113472	0.4858
CD96	-0.0229419	0.372629
CDAN1	-0.92348	0.478669
CDC14A	-0.03406	0.439703
CDC16	-1.35642	0.542787
CDC20B	-0.153193	0.382736
CDC23	-1.26947	0.6
CDC25B	-0.259496	0.549683
CDC27	-1.31493	0.480799
CDC37	-0.84169	0.52648
CDC40	-0.695591	0.534884
CDC42BPA	0.0713544	0.418359
CDC42BPB	-0.054275	0.637755
CDC45	-1.46658	0.40678
CDC5L	-1.20165	0.609756
CDC7	-1.14401	0.380488
CDC73	-0.743406	0.261968
CDCA2	-0.0941796	0.397814
CDCA7	0.0917359	0.394137
CDCA7L	-0.0802229	0.438636
CDCP1	-0.0714245	0.464396
CDCP2	0.015526	0.425688
CDH1	-0.144873	0.470543
CDH10	0.0806658	0.513238
CDH11	0.0920861	0.500766
CDH12	-0.0411527	0.444079
CDH13	0.133006	0.554321
CDH15	-0.238083	0.480126
CDH16	0.0169944	0.416456
CDH17	-0.0171974	0.391931
CDH18	-0.0501383	0.439597
CDH19	0.0724306	0.371469
CDH2	-0.0898027	0.529061
CDH20	0.0453964	0.528302
CDH22	-0.0759128	0.580032
CDH23	-0.103723	0.483553
CDH24	-0.197683	0.473068
CDH26	-0.188099	0.423445
CDH3	-0.0121551	0.513798
CDH4	-0.0163074	0.610963
CDH5	-0.32444	0.52193
CDH6	0.00348699	0.577909
CDH7	0.010572	0.577652
CDH8	0.21199	0.549708
CDH9	0.0527418	0.484087
CDHR1	-0.17661	0.48643
CDHR2	0.00816465	0.480591
CDHR3	-0.0387234	0.438824
CDHR4	-0.05688	0.440874
CDHR5	0.0156661	0.54663
CDK11A	-0.693293	0.495575
CDK12	-0.328872	0.493179
CDK13	-0.147856	0.53154
CDK14	0.155238	0.516418
CDK15	0.0668147	0.429775
CDK17	0.0529843	0.579365
CDK18	-0.0314796	0.410309
CDK19	-0.0457294	0.621247
CDK5RAP1	-0.0865616	0.448347
CDK5RAP2	-0.254397	0.398013
CDK6	-0.483093	0.731034
CDK8	-0.12246	0.8
CDKAL1	-0.0926024	0.474537
CDKL2	-0.244685	0.331887
CDKN1A	0.164336	0.319838
CDKN1B	-0.0296192	0.473881
CDKN2A	-0.0809114	0.422764
CDON	-0.0322162	0.394112
CDS1	-0.0824282	0.378472
CDYL	-0.221632	0.62069
CDYL2	0.0203131	0.572025
CEACAM16	-0.197394	0.494253
CEACAM6	-0.14783	0.513158
CEACAM7	-0.0744233	0.348148
CEACAM8	-0.0182887	0.394667
CEBPA	-0.247859	0.579251
CEBPZ	-0.70747	0.410811
CEL	0.00159978	0.48984
CELF1	-0.188793	0.59081
CELF2	-0.128267	0.938017
CELF3	-0.0612785	0.710425
CELF4	0.0284504	0.581292
CELF5	-0.136283	0.919831
CELF6	-0.0201045	0.554286
CELSR1	0.150076	0.550412
CELSR2	-0.0946227	0.547837
CELSR3	-0.0869629	0.53859
CENPB	-0.0619719	0.740648
CENPE	-0.528705	0.387872
CENPF	-0.269373	0.369979
CENPJ	-0.325548	0.348749
CEP104	0.0321828	0.400835
CEP112	-0.068413	0.356079
CEP120	-0.0177573	0.342857
CEP128	0.165416	0.356757
CEP135	-0.325231	0.337838
CEP152	-0.387127	0.361071
CEP164	0.111479	0.408568
CEP170	-0.00667027	0.396192
CEP192	-0.64488	0.364372
CEP250	-0.172344	0.422954
CEP290	-0.0522461	0.3449
CEP350	-0.134328	0.358202
CEP57	-0.106744	0.477495
CEP63	0.0547734	0.323052
CEP68	-0.192562	0.418182
CEP70	0.0559706	0.354717
CEP72	-0.089104	0.48445
CEP76	0.0611093	0.358416
CEP78	-0.163988	0.344
CEP85	-0.422344	0.38796
CEP85L	-0.180773	0.405007
CEP89	-0.0961381	0.418527
CEP95	-0.00978298	0.350242
CEP97	-0.354762	0.402262
CER1	0.0473308	0.378289
CERCAM	-0.299281	0.447602
CERK	-0.180072	0.513393
CERKL	0.0123435	0.360601
CES2	-0.0863152	0.736
CES3	-0.0363431	0.429769
CES4A	-0.165913	0.419065
CES5A	-0.0221989	0.42517
CETN1	0.0587217	0.464286
CETP	-0.0732172	0.413136
CFB	-0.246672	0.524917
CFH	0.0690197	0.443216
CFHR3	0.0863538	0.368231
CFHR5	0.0685713	0.339721
CFI	0.0327775	0.385455
CFTR	0.0426425	0.244326
CGN	-0.0697323	0.346479
CGNL1	0.049403	0.349451
CHAD	-0.0927396	0.451701
CHAF1A	-0.975031	0.572789
CHAF1B	-1.46898	0.491429
CHAT	-0.0215126	0.437838
CHD1	-0.228472	0.522184
CHD1L	0.0329391	0.377378
CHD2	-0.0214283	0.582726
CHD3	-0.0885024	0.68156
CHD4	-0.952393	0.73425
CHD5	-0.0107791	0.695197
CHD6	-0.0587859	0.48211
CHD7	-0.0099363	0.44804
CHD8	-0.146348	0.359535
CHD9	0.0993086	0.448276
CHDH	-0.0145878	0.48228
CHEK1	-1.20335	0.368317
CHEK2	0.191013	0.304667
CHERP	-1.02005	0.717775
CHFR	-0.0467361	0.507799
CHGB	0.0248721	0.415061
CHI3L1	-0.00449356	0.466667
CHIA	0.035464	0.401639
CHIT1	-0.103184	0.418052
CHL1	0.0664071	0.371763
CHML	0.010368	0.517024
CHN1	0.174794	0.460916
CHN2	-0.0551025	0.431438
CHPF	0.0172908	0.561497
CHPF2	-0.0524532	0.417666
CHRD	0.0157328	0.485793
CHRDL2	-0.0374803	0.545679
CHRM1	-0.0998811	0.725
CHRM2	0.0188444	0.529412
CHRM3	0.0473993	0.652893
CHRM4	-0.0621617	0.716172
CHRM5	-0.00974524	0
CHRNA1	-0.0190409	0.437799
CHRNA10	-0.0942608	0.489583
CHRNA2	0.151369	0.444653
CHRNA3	0.185193	0.615572
CHRNA5	-0.0643552	0.397985
CHRNA6	-0.0666574	0.392947
CHRNA9	-0.153938	0.426434
CHRNB1	-0.0252939	0.427723
CHRNB2	0.0295357	0.55157
CHRNB3	0.0776987	0.442815
CHRNB4	0.0363184	0.568
CHRND	-0.295245	0.452288
CHRNG	-0.278047	0.366826
CHST1	-0.0161977	0.647249
CHST10	-0.15437	0.577947
CHST11	0.0171394	0.534351
CHST12	-0.00994175	0.540426
CHST13	-0.0171747	0.46875
CHST15	0.069799	0.47487
CHST2	-0.0850343	0.579677
CHST3	-0.00768957	0.52439
CHST4	-0.253883	0.356125
CHST8	-0.20571	0.442857
CHST9	0.086189	0.355556
CHSY1	0.121834	0.527778
CHSY3	-0.0444122	0.469003
CHTF18	-0.380881	0.548892
CHUK	-0.107608	0.485646
CIC	-0.0871959	0.597319
CIITA	0.0510852	0.534759
CILP	0.110053	0.337251
CILP2	-0.171667	0.45354
CIZ1	-0.26499	0.463351
CKAP2	-0.261872	0.388988
CKAP2L	-0.16242	0.35318
CKAP4	0.0827365	0.53373
CKAP5	-1.03573	0.487941
CKM	-0.0603415	0.639175
CKMT2	0.101544	0.679641
CLASRP	-0.424832	0.541096
CLCA1	0.101258	0.401379
CLCA2	-0.0227593	0.42362
CLCA4	0.000692359	0.348774
CLCN1	0.0309336	0.417973
CLCN2	-0.0986921	0.46729
CLCN3	0.050909	0.590244
CLCN6	0.00236884	0.523438
CLCN7	-0.143341	0.697015
CLCNKA	0.00368882	0.49313
CLDN17	0.137179	0.392857
CLEC14A	-0.131724	0.522983
CLEC16A	-0.0410976	0.529623
CLEC1A	-0.0382097	0.311828
CLEC3A	0.0954645	0.309859
CLEC4F	-0.0364499	0.391653
CLEC4M	0.173917	0.510086
CLGN	0.0437718	0.321016
CLIC5	0.0201158	0.448363
CLIC6	-0.0393348	0.45288
CLINT1	-0.00549767	0.408019
CLIP1	0.0634931	0.476939
CLIP2	-0.0170833	0.642512
CLIP3	0.0331898	0.629333
CLIP4	0.161781	0.412613
CLK1	-0.0473019	0.42233
CLK2	-0.404021	0.438849
CLK3	-0.0875032	0.521186
CLMN	0.0914938	0.404651
CLN3	-0.169643	0.503563
CLNK	0.0128357	0.361607
CLOCK	0.200001	0.395216
CLP1	-0.949303	0.449153
CLPB	-0.241565	0.45977
CLPTM1	-0.169019	0.727494
CLPTM1L	0.0891233	0.585513
CLPX	-0.213095	0.460154
CLSPN	-0.528953	0.354145
CLSTN1	-0.0493283	0.525381
CLSTN2	0.0211172	0.490909
CLSTN3	-0.0731098	0.465498
CLTC	-1.14656	0.976959
CLTCL1	-0.0467784	0.390192
CLU	0.0413918	0.559322
CLUL1	0.0134648	0.419023
CLVS1	0.0273789	0.545045
CLVS2	0.101854	0.562842
CMIP	-0.335824	0.779886
CMKLR1	-0.133321	0.394737
CMYA5	0.0189966	0.363749
CNBD1	0.208336	0.274
CNDP1	-0.00910757	0.413717
CNDP2	-0.0237466	0.456265
CNGA1	-0.0901064	0.405365
CNGA3	-0.0643955	0.409357
CNGA4	-0.00759932	0.410305
CNGB1	0.0830315	0.4145
CNGB3	-0.0143937	0.328145
CNKSR1	0.0203838	0.409756
CNKSR3	0.0420459	0.5
CNNM1	-0.108634	0.575893
CNNM2	-0.0751184	0.883772
CNNM3	-0.0955226	0.582237
CNNM4	-0.0661377	0.59727
CNOT1	-0.627267	0.766932
CNOT10	-0.141397	0.379771
CNOT2	-0.454564	0.70852
CNOT3	-1.09797	0.708638
CNOT4	-0.0102405	0.621622
CNOT6	-0.117531	0.631769
CNR1	0.109378	0.79845
CNST	0.13969	0.440334
CNTLN	-0.0183979	0.355943
CNTN1	-0.0313376	0.480826
CNTN2	-0.14572	0.497262
CNTN3	-0.0231934	0.459945
CNTN4	0.033981	0.485112
CNTN5	0.060392	0.374286
CNTN6	0.0342526	0.363171
CNTNAP1	-0.294542	0.847761
CNTNAP2	0.0578969	0.41653
CNTNAP4	0.197864	0.407618
CNTNAP5	0.0374593	0.458371
CNTRL	-0.0995538	0.35237
CNTROB	-0.115769	0.442485
COASY	-0.664399	0.443252
COBL	0.0950416	0.4447
COBLL1	0.0228816	0.338614
COCH	-0.222291	0.422175
COG1	-0.469814	0.424346
COG2	-0.607015	0.444867
COG3	-0.885282	0.484436
COG4	-0.543596	0.455013
COG5	-0.161954	0.399083
COG6	-0.403848	0.34992
COG7	-0.35659	0.459605
COG8	-0.462372	0.574627
COIL	-0.322984	0.394558
COL10A1	0.0582748	0.399267
COL11A1	0.0217878	0.404034
COL11A2	0.049948	0.481432
COL12A1	-0.0019514	0.426913
COL13A1	-0.0119501	0.53537
COL14A1	-0.00830805	0.454896
COL15A1	-0.117729	0.414516
COL16A1	0.0747103	0.450549
COL17A1	-0.260491	0.400282
COL18A1	-0.0652064	0.574897
COL19A1	0.0604345	0.414376
COL1A1	0.0179568	0.441176
COL1A2	0.0632978	0.403433
COL20A1	0.0782268	0.497711
COL21A1	0.0234987	0.419829
COL22A1	0.117224	0.416561
COL23A1	0.0227947	0.519924
COL24A1	-0.0811593	0.341153
COL25A1	-0.10134	0.45809
COL27A1	0.0356668	0.468037
COL28A1	0.194383	0.339965
COL2A1	0.0272041	0.509754
COL3A1	0.077139	0.439024
COL4A1	-0.0684175	0.592528
COL4A2	0.0576468	0.499072
COL4A3	0.0039461	0.38914
COL4A4	0.0657364	0.426136
COL5A1	-0.0223222	0.539613
COL5A2	-0.0335036	0.446182
COL5A3	0.0471274	0.456821
COL6A1	0.113631	0.551136
COL6A2	0.0418694	0.537756
COL6A3	0.0241014	0.423763
COL6A6	0.0512057	0.345369
COL7A1	-0.21408	0.434185
COL8A1	-0.14243	0.470149
COL8A2	-0.106699	0.594059
COL9A1	-0.0183998	0.455504
COL9A2	0.00398633	0.448737
COL9A3	-0.195858	0.514983
COLEC10	0.0995117	0.385281
COLEC11	0.0463592	0.610451
COLEC12	0.0234363	0.514677
COLQ	0.0732016	0.369231
COMP	0.0058616	0.439372
COPA	-1.21918	0.490754
COPB1	-1.37539	0.461394
COPB2	-1.20378	0.506993
COPS2	-0.598157	1.02857
CORIN	-0.0361295	0.356855
CORO1A	-0.0918593	0.684366
CORO1B	-0.0865662	0.523438
CORO1C	-0.106477	0.515924
CORO2A	-0.0927092	0.470726
CORO2B	0.0546097	0.539432
CORO6	-0.243375	0.390328
COX10	-0.386957	0.480952
CP	0.100673	0.426606
CPA1	-0.0080282	0.473988
CPA2	0.0108789	0.376771
CPA3	0.0329676	0.293399
CPA4	0.00932547	0.449153
CPA5	-0.0940308	0.47981
CPA6	-0.00965129	0.307329
CPAMD8	-0.379348	0.464874
CPB1	-0.090324	0.351124
CPB2	-0.0717008	0.547038
CPD	-0.18704	0.464037
CPE	-0.174592	0.470219
CPEB2	0.0638156	0.501591
CPEB3	0.314429	0.537285
CPEB4	0.0202122	0.572207
CPED1	0.0352566	0.393096
CPN1	-0.0396089	0.488491
CPN2	-0.0631561	0.567929
CPNE1	-0.044985	0.37961
CPNE2	-0.0970085	0.557457
CPNE3	-0.0969086	0.334029
CPNE4	0.0594945	0.574648
CPNE5	-0.213787	0.596154
CPNE6	-0.224953	0.877828
CPNE7	-0.4845	0.535627
CPNE8	0.0780656	0.508427
CPNE9	-0.0375661	0.530526
CPS1	-0.018238	0.512156
CPSF2	-0.923398	0.508065
CPSF3	-0.840983	0.571429
CPSF6	-0.66968	0.857778
CPT1A	-0.207544	0.475962
CPT1B	-0.230732	0.549215
CPT1C	0.00526841	0.495
CPVL	0.0131396	0.366093
CPXM1	0.0994957	0.478548
CPXM2	-0.0212658	0.398374
CPZ	-0.0839775	0.443049
CR2	0.00306018	0.394948
CRAT	-0.170615	0.513289
CRB1	0.0170637	0.359669
CRB2	-0.17773	0.493436
CREB3L1	0.119129	0.511111
CREB3L2	0.0787625	0.42348
CREB3L3	-0.0958065	0.513699
CREB5	0.230788	0.45303
CREBBP	-0.189394	0.617946
CRHBP	-0.0791801	0.446809
CRHR1	-0.0669059	0.524781
CRHR2	0.0459973	0.416667
CRIM1	-0.110243	0.48832
CRISP1	-0.136249	0.340741
CRISP2	0.012723	0.323194
CRISP3	0.0695058	0.382576
CRISPLD1	0.178157	0.317073
CRISPLD2	-0.0230678	0.434483
CRMP1	-0.143796	0.701613
CRNKL1	-0.98776	0.452456
CRNN	-0.0382645	0.391892
CROCC	-0.147051	0.448938
CROT	0.0405099	0.308738
CRP	-0.107228	0.461929
CRTAC1	-0.108363	0.490503
CRTAM	0.0239392	0.398089
CRTC1	-0.134108	0.711359
CRTC2	-0.181265	0.479957
CRTC3	-0.15983	0.52071
CRX	-0.222605	0.541176
CRY1	0.0450235	0.48227
CRY2	-0.0418555	0.549505
CRYBB1	0.0792461	0.465438
CS	-0.417956	0.565
CSAD	-0.148929	0.444245
CSDE1	-0.352505	0.580381
CSE1L	-0.972876	0.583004
CSF1	-0.0215783	0.485043
CSF1R	-0.0791117	0.543597
CSF2RB	-0.0731021	0.523114
CSF3R	-0.123653	0.482808
CSGALNACT1	0.0500369	0.383721
CSGALNACT2	-0.036931	0.433498
CSMD2	-0.001693	0.515598
CSMD3	0.083432	0.411492
CSNK1A1	-0.508437	1.3617
CSNK1A1L	-0.0371615	0.420875
CSNK1G2	-0.126911	0.739837
CSPG4	-0.215735	0.48962
CSPG5	-0.12391	0.502294
CSPP1	-0.082162	0.332817
CSRNP1	-0.0129997	0.489362
CSRNP2	0.0337238	0.5
CSRNP3	0.142599	0.462617
CSTF1	-0.892999	1.02516
CSTF3	-0.75912	0.74359
CTAGE1	-0.000978763	0.328786
CTBP1	0.0861621	0.92
CTBP2	-0.367285	0.508861
CTC1	-0.341049	0.452335
CTCFL	0.136457	0.45493
CTDP1	-0.857441	0.530853
CTIF	0.052445	0.522901
CTNNA1	-0.0534732	0.652249
CTNNA3	-0.0847758	0.335171
CTNNAL1	0.0395095	0.364154
CTNNB1	-0.140231	0.507338
CTNNBL1	-0.767013	0.504202
CTNND1	-0.0755074	0.394428
CTNND2	0.00126367	0.591928
CTR9	-0.632611	0.677239
CTSA	0.0126301	0.475763
CTSC	0.115372	0.407407
CTSD	0.118346	0.62908
CTSE	0.0914416	0.460154
CTSG	0.0726304	0.476852
CTTN	-0.164659	0.481788
CTTNBP2	0.0457564	0.398169
CTTNBP2NL	-0.0316975	0.428261
CTU2	-0.730493	0.500425
CUBN	-0.138638	0.394695
CUL1	-0.853226	1.16585
CUL2	-0.734529	0.572944
CUL3	-0.425031	0.827362
CUL4A	-0.00666177	0.630394
CUL5	0.178244	0.886029
CUL7	-0.349193	0.448769
CUL9	-0.146542	0.490074
CUX1	0.14042	0.620741
CUX2	-0.132637	0.558849
CUZD1	0.043232	0.372807
CWC22	-1.01576	0.386328
CWF19L2	-0.617721	0.296343
CWH43	0.0287501	0.392508
CX3CR1	0.12217	0.517857
CXCR1	-0.096021	0.430267
CXCR4	0.0576138	0.513393
CXXC1	-0.453832	0.6
CYB5R4	-0.37353	0.386667
CYLC2	0.120446	0.262599
CYLD	-0.182814	0.555556
CYP11A1	-0.0447116	0.433824
CYP11B1	0.0495889	0.477032
CYP11B2	0.164858	0.492063
CYP17A1	-0.0290585	0.533333
CYP19A1	-0.0211744	0.408213
CYP1A1	0.0430649	0.341328
CYP1A2	-0.159292	0.426501
CYP1B1	0.0677361	0.412979
CYP24A1	0.0452074	0.369025
CYP26A1	-0.214385	0.465011
CYP26B1	0.0290918	0.556064
CYP26C1	-0.182216	0.442593
CYP27A1	-0.052614	0.418994
CYP27C1	0.0305996	0.44
CYP2B6	0.0297262	0.423459
CYP2C18	-0.0853563	0.380744
CYP2C19	0.128587	0.394097
CYP2C8	0.0804267	0.327869
CYP2C9	0.0758744	0.372617
CYP2D6	0.182451	0.439336
CYP2E1	-0.0802173	0.475248
CYP2F1	-0.0652835	0.426948
CYP2S1	-0.149639	0.505995
CYP2W1	-0.134287	0.523064
CYP39A1	0.118678	0.401119
CYP3A4	0.0573242	0.306522
CYP3A43	-0.0950445	0.37587
CYP3A5	-0.0203458	0.371795
CYP46A1	-0.0415756	0.797048
CYP4B1	-0.141523	0.391137
CYP4F12	-0.103522	0.351351
CYP4F22	-0.0953662	0.386831
CYP4V2	0.11137	0.328629
CYP4X1	-0.108179	0.441463
CYP4Z1	-0.00726622	0.323529
CYP7A1	0.0378841	0.349169
CYP7B1	0.0614342	0.374757
CYP8B1	-0.00711275	0.368182
CYSLTR2	0.0987956	0.322034
CYTH3	-0.0708726	0.777778
CYTH4	-0.1196	0.517241
CYTIP	-0.0677454	0.382671
D2HGDH	-0.0883941	0.538111
DAAM1	0.111684	0.450925
DAAM2	-0.0532976	0.435058
DAB1	-0.0305487	0.478589
DAB2	0.105777	0.432759
DAB2IP	0.262521	0.583647
DACT1	0.106107	0.486891
DACT2	0.05594	0.456164
DAG1	0.0260026	0.515581
DAGLA	-0.0995634	0.694656
DAGLB	-0.152294	0.474185
DAO	-0.137009	0.384615
DAPK1	-0.00396109	0.594648
DAPK3	0.0782127	0.665025
DARS2	-0.344045	0.336576
DAXX	-0.32033	0.516949
DAZAP1	-0.273751	0.714286
DBF4	-0.593926	0.40678
DBF4B	-0.109729	0.432065
DBH	0.0738254	0.439878
DBN1	-0.00419019	0.481833
DBX2	-0.111677	0.497222
DCAF12	0.01391	0.538745
DCAF13	0.026672	0.410788
DCAF15	-0.225437	0.682093
DCAF4	-0.329531	0.456967
DCAF4L1	-0.0139835	0.722689
DCAF4L2	-0.0468876	0.468144
DCAF5	-0.080443	0.548611
DCAF6	-0.317053	0.494012
DCBLD1	0.0699986	0.453846
DCBLD2	0.0243341	0.456853
DCC	0.106422	0.439934
DCDC1	0.174611	0.3875
DCDC2	-0.0858772	0.408696
DCHS1	-0.0511611	0.478479
DCHS2	0.0296119	0.413007
DCLK1	-0.133638	0.718421
DCLK2	0.00149447	0.507666
DCLK3	-0.0769485	0.448343
DCLRE1A	0.09734	0.373945
DCLRE1B	-0.699103	0.39726
DCLRE1C	-0.00268891	0.515217
DCN	0.0133175	0.555556
DCP1B	0.085544	0.401667
DCST1	-0.157939	0.424411
DCST2	-0.145701	0.402926
DCT	-0.0343223	0.343173
DCTN1	-0.444267	0.462525
DDB1	-1.33719	0.772727
DDC	0.0108555	0.418699
DDHD1	0.0381172	0.449728
DDHD2	0.0405336	0.435748
DDI1	0.0773983	0
DDN	-0.412011	0.497333
DDO	0.00897762	0.427711
DDR1	-0.0366347	0.48974
DDR2	-0.0136489	0.524324
DDX1	-0.441005	0.43722
DDX10	-1.02606	0.370317
DDX11	-0.72626	0.44
DDX17	-0.202092	0.697406
DDX18	-0.739074	0.372222
DDX20	-0.655264	0.444307
DDX21	-0.610038	0.434988
DDX23	-0.845748	0.656915
DDX24	-0.83306	0.425316
DDX27	-0.731197	0.44
DDX31	-0.132422	0.431467
DDX39A	-0.24617	0.780576
DDX4	0.0110273	0.452214
DDX42	-0.904883	0.519115
DDX43	-0.0536747	0.396917
DDX46	-0.511294	0.884146
DDX5	-0.514466	0.840989
DDX50	-0.241562	0.493333
DDX51	-0.749629	0.615746
DDX54	-1.01329	0.440902
DDX55	-1.13958	0.441071
DDX56	-1.22801	0.472656
DDX58	-0.0296671	0.331395
DDX59	-0.623542	0.403397
DDX60	0.078675	0.380034
DDX60L	0.131156	0.353901
DEAF1	-0.00307831	0.570659
DEF6	0.13889	0.586207
DEF8	-0.060525	0.4875
DENND1A	-0.0242471	0.545358
DENND1C	-0.137397	0.436848
DENND2A	-0.130541	0.463768
DENND2C	-0.210472	0.297183
DENND2D	-0.0631851	0.456019
DENND3	0.00791691	0.547721
DENND4A	-0.164657	0.443378
DENND4B	-0.099824	0.55515
DENND4C	-0.0189531	0.388535
DENND5A	-0.000225169	0.390374
DENND5B	0.0543312	0.516285
DEPDC1	-0.20519	0.322848
DEPDC1B	0.060744	0.385809
DEPDC5	0.185158	0.469404
DEPTOR	-0.0416329	0.350923
DES	-0.0534769	0.568441
DET1	-0.340199	0.493056
DGCR2	-0.127914	0.456914
DGCR8	-0.301446	0.603814
DGKA	-0.185058	0.483516
DGKB	0.111885	0.518135
DGKD	-0.0617667	0.582059
DGKE	-0.230172	0.507565
DGKG	0.028447	0.436123
DGKH	-0.0172072	0.514539
DGKI	0.104659	0.538462
DGKQ	0.0209867	0.562561
DGKZ	-0.137642	0.54502
DHCR7	-0.0583064	0.510367
DHDH	-0.0629228	0.427374
DHRS2	-0.0454715	0.431267
DHRS7C	0.0277105	0.501818
DHTKD1	0.110442	0.442623
DHX15	-1.02057	1.18367
DHX16	-0.637942	0.489467
DHX29	-0.241397	0.490831
DHX30	-0.213102	0.838039
DHX32	-0.0185158	0.451745
DHX33	-1.03282	0.412621
DHX34	-0.00492733	0.462585
DHX35	-0.213353	0.40429
DHX36	-0.546386	0.467818
DHX37	-1.28876	0.547475
DHX38	-0.310765	0.561077
DHX40	-0.0633804	0.581662
DHX57	-0.0985187	0.369427
DHX58	-0.180668	0.403114
DHX8	-1.14697	0.687956
DHX9	-0.577748	0.914286
DIAPH1	-0.130623	0.482833
DIAPH3	-0.238854	0.404602
DICER1	-0.593193	0.521845
DIDO1	-0.389973	0.486355
DIO3	0.118234	0.668122
DIP2A	0.00359167	0.550536
DIP2B	-0.166873	0.530825
DIP2C	0.0700459	0.691149
DIRAS3	-0.188043	0.548571
DIS3	-0.711266	0.375498
DIS3L	-0.224597	0.359375
DIS3L2	0.0727208	0.43153
DISC1	0.0860321	0.412834
DISP1	0.0365139	0.408414
DISP2	-0.186568	0.499612
DIXDC1	-0.108579	0.40669
DKK2	0.0275785	0.412621
DLAT	-0.0203113	0.353993
DLC1	0.0904859	0.388313
DLEC1	-0.00740185	0.410966
DLG1	-0.0232326	0.387097
DLG2	0.0538155	0.503455
DLG4	-0.20377	0.596954
DLG5	-0.280148	0.567549
DLGAP1	0.201297	0.532919
DLGAP2	0.103528	0.573731
DLGAP3	-0.141734	0.569921
DLGAP4	0.0556835	0.571625
DLGAP5	-0.188186	0.33237
DLK1	-0.123133	0.498607
DLL1	-0.0315175	0.7296
DLL3	-0.0914236	0.5
DLL4	-0.0466328	0.545455
DLX5	-0.113739	0.467742
DMBX1	0.00462351	0.472393
DMGDH	0.103159	0.443843
DMKN	-0.14016	0.383094
DMP1	0.0196442	0.348028
DMPK	-0.0346055	0.528455
DMRT1	0.0608999	0.518987
DMRT2	0.332455	0.429017
DMRT3	0.0518282	0.466786
DMRTA1	-0.00102718	0.428571
DMRTB1	-0.0112537	0.528875
DMRTC2	-0.143054	0.528571
DMTF1	-0.0160986	0.497186
DMWD	-0.108515	0.742515
DMXL1	-0.0640654	0.393793
DMXL2	-0.00525194	0.420268
DNAAF1	0.0794803	0.370438
DNAAF3	0.0783255	0.412615
DNAH1	-0.155752	0.455116
DNAH10	-0.172703	0.440641
DNAH11	0.0817502	0.36251
DNAH12	0.104382	0.337883
DNAH14	0.125022	0.336615
DNAH2	-0.146193	0.441441
DNAH3	0.0121127	0.41776
DNAH5	-0.169404	0.386497
DNAH6	0.156057	0.37461
DNAH7	-0.12892	0.341908
DNAH9	-0.106064	0.394172
DNAI1	-0.0750771	0.391502
DNAI2	0.00213698	0.476021
DNAJB5	0.0225687	0.649485
DNAJB8	-0.11593	0.458333
DNAJC1	0.0410017	0.391393
DNAJC10	-0.0587463	0.349325
DNAJC11	-0.615422	0.540541
DNAJC13	-0.277742	0.390211
DNAJC14	-0.0739322	0.428839
DNAJC16	-0.153622	0.392384
DNAJC2	-0.164038	0.404227
DNAJC21	-0.073486	0.381295
DNAJC5B	-0.0932184	0.379121
DNAJC6	-0.0395846	0.419643
DNAJC7	-0.0628927	0.64604
DNER	0.0337574	0.487725
DNHD1	-0.0163061	0.426479
DNM1	-0.307107	0.773547
DNM1L	-0.607448	0.632613
DNM2	-0.946585	0.704584
DNM3	-0.195787	0.4672
DNMBP	-0.0468162	0.400125
DNMT1	-0.389869	0.716535
DNMT3A	0.100431	0.416318
DNMT3B	-0.0389126	0.484709
DNMT3L	0.0395013	0.381616
DNTT	0.00655831	0.368421
DOC2A	-0.00963894	0.517419
DOCK10	0.016988	0.414887
DOCK2	0.12257	0.548303
DOCK3	0.0226749	0.51034
DOCK4	0.0178697	0.484468
DOCK5	-0.0307369	0.432215
DOCK6	-0.299964	0.465334
DOCK7	-0.22165	0.426237
DOCK8	0.0141142	0.436721
DOCK9	0.0151756	0.526459
DOK2	-0.067431	0.398821
DOK3	0.0178386	0.46129
DOK5	0.0383709	0.400735
DOK6	0.118102	0.51073
DOT1L	-0.0373698	0.654504
DPEP2	-0.0599796	0.44586
DPEP3	-0.0468794	0.511568
DPF1	-0.154049	0.721805
DPF2	-0.342622	0.618056
DPF3	0.0580059	0.493865
DPH2	-0.39261	0.427039
DPP10	0.0534663	0.396135
DPP3	-0.109002	0.470149
DPP4	0.133922	0.406143
DPP7	-0.202796	0.480465
DPP8	-0.0389531	0.463956
DPP9	-0.119411	0.61898
DPPA2	-0.38534	0.352
DPPA4	0.071044	0.5
DPY19L1	-0.0162776	0.433735
DPY19L2	-0.516023	0.408428
DPY19L3	-0.00420702	0.511879
DPY19L4	-0.0497402	0.351759
DPYD	-0.122181	0.357518
DPYS	-0.00739725	0.422222
DPYSL2	0.0526835	0.719212
DPYSL3	0.079941	0.525849
DPYSL4	0.0172345	0.611789
DPYSL5	-0.0546602	0.715719
DQX1	-0.0728569	0.416667
DRD1	0.0568209	0.754237
DRD2	0.0314438	0.705224
DRD3	-0.0732567	0.489726
DRD5	0.0567678	0.474954
DRGX	-0.161469	0.42126
DROSHA	-0.364273	0.492891
DSC1	0.0572394	0.384715
DSC2	0.076321	0.369077
DSC3	-0.0103748	0.380435
DSCAM	-0.0337375	0.577434
DSCAML1	-0.0432973	0.61079
DSE	0.075495	0.462181
DSEL	0.128438	0.372254
DSG1	0.0307804	0.378855
DSG2	-0.0312999	0.371834
DSG3	0.0797247	0.371734
DSG4	0.0197979	0.32846
DSP	-0.0877978	0.418489
DSPP	-0.0742112	0.507768
DST	-0.0368791	0.393161
DSTYK	-0.12503	0.45686
DTHD1	-0.193676	0.337333
DTL	-1.192	0.463617
DTNA	0.0649012	0.454701
DTNB	0.0276192	0.377329
DTX1	-0.00584484	0.613272
DTX2	-0.300203	0.537133
DTX3	-0.132418	0.730924
DTX3L	0.0332747	0.359398
DTX4	-0.0169228	0.495851
DUOX1	-0.036428	0.45563
DUOXA1	-0.0364003	0.432566
DUS1L	-0.09512	0.466834
DUS3L	-0.0323143	0.540897
DUSP10	-0.120568	0.508287
DUSP16	-0.0375775	0.515593
DUSP22	-0.233971	0.465558
DUSP27	0.0543848	0.403694
DUSP5	0.0308733	0.533333
DUSP8	-0.133895	0.704641
DVL1	-0.201991	0.55711
DVL2	-0.0471265	0.513821
DVL3	-0.155276	0.525952
DYM	-0.0527283	0.432551
DYNC1H1	-1.08514	0.887821
DYNC1I1	0.0821933	0.449173
DYNC1I2	-1.02001	0.431635
DYNC2H1	0.0193277	0.365824
DYRK1A	-0.134122	0.491909
DYRK1B	-0.00525013	0.506108
DYRK2	-0.0749885	0.557178
DYRK3	0.134952	0.390295
DYRK4	-0.00761723	0.388027
DYSF	0.00178315	0.425341
DYTN	0.0487946	0.366038
DZANK1	0.0797066	0.367665
DZIP1	0.143506	0.381242
DZIP1L	0.0338494	0.35443
DZIP3	-0.00629588	0.326617
E2F3	-0.299833	0.507599
E2F7	0.140456	0.513158
E2F8	-0.0630584	0.458065
E4F1	-0.505197	0.56814
EBF1	-0.0368788	0.618926
EBF2	0.0532719	0.587131
EBF3	-0.0631599	0.695312
ECE1	-0.0852202	0.57971
ECE2	-0.0783833	0.447405
ECEL1	-0.128247	0.48771
ECM1	-0.161489	0.378906
ECM2	0.110527	0.422018
ECT2	-1.03453	0.392857
ECT2L	-0.315647	0.373016
EDAR	-0.0948156	0.484513
EDC4	-0.435962	0.639958
EDEM1	0.0364569	0.471761
EDEM2	-0.192066	0.515663
EDEM3	-0.0527113	0.382138
EDIL3	-0.172306	0.399417
EDN3	0.249475	0.398496
EDNRA	0.0930989	0.661905
EDNRB	0.0522541	0.479167
EEA1	0.0127447	0.438445
EED	-0.299607	0.585586
EEF1A1	-0.925788	1.33333
EEF1A2	-0.0163196	1.83735
EEF1B2	-0.66705	0.64
EEF1D	-0.165585	0.555619
EEF2	-1.56792	1.496
EEF2K	0.0165973	0.426009
EEFSEC	-0.493364	0.474378
EEPD1	0.0844941	0.467871
EFCAB3	-0.0740269	0.403561
EFCAB5	-0.131619	0.376601
EFCAB6	0.0648293	0.381684
EFCAB7	0.0354921	0.353904
EFEMP1	-0.00491496	0.537713
EFEMP2	-0.181086	0.648712
EFHB	0.0423206	0.330802
EFHC1	-0.191912	0.350719
EFR3A	-0.305441	0.34255
EFR3B	-0.180566	0.611607
[truncated: 7,152 more rows]
