# Supplementary material for: Use of signals of positive and negative selection to distinguish cancer genes and passenger genes
Source: eLife. 2021 Jan 11;10:e59629. doi: 10.7554/eLife.59629 (PMC7877913; doi:10.7554/eLife.59629)
Supplement: Supplementary file 8. [file elife-59629-supp8.xlsx]

## Sheet: Supplementary file 6
Dataset	transcript	somatic mutations
CosmicMutantExport.tsv, release v88 file, targeted screens and genome wide screens	29415	6721297
SO (Substitutions Only)	29399	6141650
SSI (Substitutions and Subtle Indels)	29405	6449721
SO, at least 100 somatic mutations	17885	5569690
SSI, at least 100 somatic mutations	18332	5898456
filtered SO (confirmed somatic mutations, flagged ’n’ for SNPs, data from cell-lines, organoid-cultures, xenografts excluded)	13803	3459981
filtered SSI (confirmed somatic mutations, flagged ’n’ for SNPs, data from cell-lines, organoid-cultures, xenografts excluded)	13930	3513545
CosmicMutantExport.tsv, release v88 file, genome wide screens	29407	6065436
SO (Substitutions Only)	29388	5633526
SSI (Substitutions and Subtle Indels)	29395	5859008
SO, at least 100 somatic mutations	17749	5053604
SSI, at least 100 somatic mutations	18224	5302293
filtered SO (confirmed somatic mutations, flagged ’n’ for SNPs, data from cell-lines, organoid-cultures, xenografts excluded)	13669	3258705
CosmicMutantExport.tsv, release v88 file, targeted screens	13120	655861
SO (Substitutions Only)	12495	508124
SSI (Substitutions and Subtle Indels)	12816	590713
SO, at least 100 somatic mutations	517	450806
SSI, at least 100 somatic mutations	542	532106
filtered SO (confirmed somatic mutations, flagged ’n’ for SNPs, data from cell-lines, organoid-cultures, xenografts excluded)	400	157566
