# Supplementary material for: Use of signals of positive and negative selection to distinguish cancer genes and passenger genes
Source: eLife. 2021 Jan 11;10:e59629. doi: 10.7554/eLife.59629 (PMC7877913; doi:10.7554/eLife.59629)
Supplement: Supplementary file 9. — Transcripts of OGs (oncogenes) and TSGs (tumor suppressor genes) of the cancer gene list of Vogelstein et al., 2013 are highlighted by brick red and blue backgrounds, respectively. Transcripts of CGC (Cancer Gene Census) genes (Sondka et al., 2018) that do not correspond to OGs or TSGs of the cancer gene list of Vogelstein et al., 2013 are highlighted by yellow background. [file elife-59629-supp9.xlsx]

## Sheet: SO
Gene symbol	fS	fM	fN	rSM	rNM	rNS	rSMN	rMSN	rNSM	Number of 'substitutions only'
BRAF	0.00350153	0.995577	0.000921455	0.00351709	0.000925549	0.263158	0.00351383	225.092	0.000922305	54262
JAK2	0.00493781	0.993666	0.00139592	0.00496928	0.00140482	0.2827	0.00496231	156.885	0.00139787	47997
KRAS	0.00258545	0.996933	0.000482033	0.00259341	0.000483516	0.186441	0.00259215	325	0.000482266	45640
TP53	0.0240697	0.845935	0.129995	0.0284533	0.15367	5.40078	0.0246633	5.49078	0.149419	32032
TTN_ENST00000356127	0.206592	0.744162	0.049246	0.277616	0.0661765	0.238374	0.260385	2.90873	0.0517968	15717
EGFR	0.0187249	0.978664	0.0026113	0.0191332	0.00266823	0.139456	0.0190822	45.8687	0.00261814	15701
PIK3CA	0.0082004	0.987059	0.00474085	0.00830791	0.00480301	0.578125	0.0082682	76.2723	0.00476344	15609
TTN_ENST00000342992	0.207844	0.743447	0.0487093	0.279568	0.0655182	0.234355	0.262377	2.89783	0.0512033	15069
TP53_ENST00000269305	0.0142041	0.819824	0.165972	0.0173258	0.202448	11.6848	0.0144088	4.55013	0.199	12954
TTN_ENST00000342175	0.203927	0.746329	0.0497443	0.27324	0.0666519	0.243932	0.256166	2.94211	0.0523483	12122
TTN_ENST00000359218	0.203178	0.747165	0.0496565	0.271932	0.0664599	0.244399	0.254985	2.95516	0.0522512	12083
TP53_ENST00000455263	0.0144458	0.841621	0.143933	0.0171643	0.171018	9.96364	0.0146575	5.31399	0.168133	11422
TP53_ENST00000420246	0.014882	0.8402	0.144918	0.0177125	0.172481	9.7378	0.0151069	5.25781	0.169479	11020
IDH1	0.00492088	0.993632	0.00144732	0.00495242	0.00145659	0.294118	0.00494521	156.03	0.00144942	10364
MUC4_ENST00000463781	0.128136	0.867103	0.00476049	0.147775	0.00549011	0.0371517	0.146968	6.52463	0.00478326	10083
MUC16_ENST00000397910	0.234667	0.739048	0.0262852	0.317526	0.0355663	0.112011	0.306621	2.83212	0.0269948	9473
TP53_ENST00000413465	0.0154342	0.837109	0.147457	0.0184375	0.176151	9.55396	0.0156761	5.13906	0.172962	9006
TP53_ENST00000545858	0.00763158	0.858289	0.134079	0.00889161	0.156216	17.569	0.00769027	6.05664	0.15484	7600
NRAS	0.00651782	0.991818	0.00166412	0.00657159	0.00167785	0.255319	0.00656058	121.22	0.0016669	7211
CTNNB1	0.0166549	0.975582	0.00776288	0.0170718	0.00795718	0.466102	0.016937	39.9538	0.00782361	7085
APC	0.0886855	0.301404	0.60991	0.294241	2.02356	6.87722	0.097316	0.431443	1.56351	6337
KIT	0.0476357	0.943433	0.0089317	0.0504919	0.00946724	0.1875	0.0500184	16.678	0.00901219	5710
MUC16	0.229148	0.739947	0.0309043	0.309682	0.0417655	0.134866	0.297267	2.84537	0.0318898	5695
KRAS_ENST00000256078	0.03442	0.964669	0.000910581	0.0356806	0.000943931	0.026455	0.0356469	27.3041	0.000911411	5491
MUC16_ENST00000331986	0.233508	0.736963	0.0295288	0.316851	0.0400682	0.126457	0.304645	2.80175	0.0304273	4775
FGFR3	0.0322513	0.966906	0.00084317	0.0333551	0.00087203	0.0261438	0.0333261	29.2166	0.000843882	4744
PIK3CA_ENST00000263967	0.0167444	0.97393	0.00932599	0.0171926	0.00957563	0.556962	0.0170295	37.3577	0.00941378	4718
TP53_ENST00000414315	0.00724002	0.788723	0.204037	0.00917942	0.258693	28.1818	0.00729282	3.73313	0.25634	4558
LRP1B	0.198055	0.739801	0.0621442	0.267714	0.0840013	0.313772	0.246968	2.84321	0.066262	4216
NOTCH1	0.175336	0.712576	0.112088	0.246059	0.1573	0.639276	0.212615	2.47918	0.126238	4095
KMT2C	0.136631	0.700539	0.162831	0.195037	0.232436	1.19176	0.158253	2.33933	0.194501	4084
SYNE1_ENST00000265368	0.215093	0.724926	0.0599803	0.296711	0.0827399	0.278857	0.274037	2.63539	0.0638075	4068
SYNE1	0.214479	0.72593	0.0595912	0.295455	0.0820896	0.277842	0.273041	2.6487	0.0633674	4061
FLG	0.195134	0.771599	0.0332671	0.252896	0.0431145	0.170483	0.242443	3.37826	0.0344119	4028
CSMD3	0.180754	0.752146	0.0671001	0.240318	0.0892116	0.371223	0.220635	3.03463	0.0719264	3845
SYNE1_ENST00000423061	0.218244	0.721641	0.060115	0.302427	0.0833032	0.275449	0.279171	2.59249	0.06396	3826
MUC6	0.164402	0.823075	0.0125233	0.199741	0.0152153	0.076175	0.196747	4.65211	0.0126821	3753
MLL3_ENST00000355193	0.148297	0.698042	0.15366	0.212447	0.220131	1.03617	0.174118	2.31172	0.181559	3729
MUC6_ENST00000421673	0.162953	0.82443	0.0126174	0.197655	0.0153045	0.07743	0.194676	4.69572	0.0127787	3725
KMT2D	0.19015	0.617784	0.192066	0.307795	0.310895	1.01007	0.234797	1.61632	0.237724	3655
MLL2_ENST00000301067	0.226652	0.591859	0.181489	0.382949	0.306642	0.800738	0.293079	1.45014	0.22173	3587
SYNE1_ENST00000448038	0.227056	0.714847	0.0580971	0.317629	0.0812721	0.255871	0.293755	2.50689	0.0616806	3563
RYR2	0.225952	0.726939	0.0471086	0.310827	0.064804	0.208489	0.29191	2.66219	0.0494375	3545
CSMD3_ENST00000343508	0.180757	0.748933	0.0703103	0.241353	0.0938807	0.388976	0.220639	2.98299	0.0756277	3513
USH2A	0.200692	0.745963	0.0533449	0.269037	0.0715114	0.265805	0.251082	2.93644	0.0563509	3468
PTEN	0.0180442	0.696158	0.285797	0.0259197	0.410535	15.8387	0.0183758	2.29119	0.400163	3436
PCLO	0.193255	0.749853	0.0568915	0.257724	0.0758702	0.294385	0.239549	2.99766	0.0603234	3410
MUC17	0.220324	0.761708	0.0179676	0.28925	0.0235886	0.0815508	0.282584	3.19654	0.0182963	3395
SYNE1_ENST00000341594	0.226777	0.715423	0.0578001	0.316983	0.0807914	0.254876	0.293288	2.51399	0.0613459	3391
TTN_ENST00000360870	0.205325	0.747929	0.0467456	0.274525	0.0625	0.227666	0.258377	2.96714	0.0490379	3380
MED12	0.0470414	0.933136	0.0198225	0.0504122	0.0212429	0.421384	0.0493636	13.9558	0.0202234	3380
DNAH5	0.238222	0.704593	0.0571852	0.338099	0.0811606	0.24005	0.312719	2.38516	0.0606537	3375
PCLO_ENST00000333891	0.191369	0.75119	0.0574405	0.254754	0.0764659	0.300156	0.236658	3.01914	0.060941	3360
OBSCN	0.281137	0.682588	0.0362757	0.411869	0.0531444	0.129032	0.391085	2.15048	0.0376412	3308
AHNAK2_ENST00000333244	0.298123	0.685835	0.0160412	0.434687	0.0233892	0.0538071	0.424752	2.18304	0.0163027	3304
OBSCN_ENST00000570156	0.284802	0.682067	0.0331307	0.417558	0.048574	0.116329	0.398215	2.14532	0.034266	3290
DNMT3A	0.0547524	0.883728	0.0615195	0.0619561	0.0696136	1.1236	0.0579239	7.60053	0.0655523	3251
FAT4	0.226662	0.73436	0.0389781	0.308653	0.0530776	0.171965	0.293096	2.76449	0.040559	3053
FAT4_ENST00000394329	0.22953	0.731338	0.0391319	0.313849	0.0535072	0.170487	0.297909	2.72215	0.0407255	3041
TET2	0.0401194	0.591844	0.368037	0.0677871	0.621849	9.17355	0.0417962	1.45004	0.582371	3016
USH2A_ENST00000366943	0.208236	0.737529	0.054235	0.282342	0.0735361	0.26045	0.263002	2.80995	0.0573451	2987
CSMD1_ENST00000537824	0.26642	0.690468	0.0431122	0.385854	0.062439	0.16182	0.363177	2.23069	0.0450546	2969
NOTCH1_ENST00000277541	0.226136	0.673124	0.10074	0.33595	0.14966	0.445483	0.292217	2.05927	0.112025	2839
FAT3_ENST00000409404	0.225715	0.736489	0.0377958	0.306475	0.0513189	0.167449	0.291515	2.79491	0.0392805	2831
FAT3_ENST00000298047	0.226562	0.735085	0.0383523	0.308213	0.0521739	0.169279	0.292929	2.7748	0.0398818	2816
ZFHX4	0.241256	0.711278	0.0474661	0.339187	0.0667336	0.196746	0.317968	2.46354	0.0498314	2802
OBSCN_ENST00000284548	0.283208	0.68242	0.0343716	0.415005	0.0503673	0.121365	0.395105	2.14882	0.0355951	2793
ATM	0.0616487	0.793907	0.144444	0.0776524	0.181941	2.34302	0.065699	3.85217	0.168831	2790
RYR2_ENST00000360064	0.22509	0.729391	0.0455197	0.3086	0.0624079	0.202229	0.290472	2.69536	0.0476906	2790
PCLO_ENST00000423517	0.198052	0.747835	0.0541126	0.264834	0.0723589	0.273224	0.246964	2.96567	0.0572082	2772
FLT3	0.0883315	0.896038	0.0156307	0.0985801	0.0174442	0.176955	0.09689	8.61888	0.0158789	2751
CSMD1_ENST00000318252	0.264117	0.690346	0.0455373	0.382586	0.0659631	0.172414	0.358911	2.22941	0.0477099	2745
RYR1	0.313139	0.663504	0.0233577	0.471947	0.0352035	0.0745921	0.455898	1.9718	0.0239163	2740
MUC12	0.148827	0.841276	0.00989736	0.176906	0.0117647	0.0665025	0.174849	5.30023	0.0099963	2728
SF3B1	0.142001	0.850131	0.00786812	0.167034	0.00925518	0.055409	0.165502	5.6725	0.00793051	2669
MUC12_ENST00000379442	0.145379	0.846356	0.00826446	0.171771	0.00976476	0.0568475	0.17011	5.50856	0.00833333	2662
FAT1	0.163848	0.696355	0.139797	0.235294	0.200756	0.853211	0.195955	2.29332	0.162516	2661
MUC5AC	0.282576	0.701136	0.0162879	0.403025	0.0232307	0.0576408	0.393875	2.34601	0.0165576	2640
MUC5B	0.282609	0.701475	0.0159161	0.402878	0.0226895	0.0563187	0.393939	2.3498	0.0161736	2576
APOB	0.242885	0.717349	0.0397661	0.338587	0.0554348	0.163724	0.320803	2.53793	0.0414129	2565
HRNR	0.206951	0.765008	0.0280411	0.270521	0.0366546	0.135496	0.260956	3.25546	0.0288501	2532
MYD88	0.00752177	0.988519	0.00395883	0.00760913	0.00400481	0.526316	0.00757878	86.1034	0.00397456	2526
GPR98	0.192996	0.752089	0.0549144	0.256614	0.0730159	0.284536	0.239152	3.03371	0.0581053	2513
NEB_ENST00000397345	0.223994	0.734157	0.0418493	0.305103	0.0570033	0.186833	0.288649	2.76162	0.0436772	2509
FAT	0.170144	0.695827	0.134029	0.244521	0.192618	0.787736	0.205029	2.2876	0.154773	2492
HMCN1	0.195093	0.74457	0.0603379	0.262021	0.0810373	0.309278	0.242379	2.91496	0.0642123	2486
ARID1A	0.0631107	0.490228	0.446661	0.128738	0.91113	7.07742	0.067362	0.961661	0.807211	2456
XIRP2	0.206382	0.740157	0.0534604	0.278835	0.0722284	0.259036	0.260052	2.84848	0.0564799	2413
RYR3	0.262193	0.691121	0.0466861	0.379373	0.0675513	0.17806	0.355367	2.23752	0.0489725	2399
NF1	0.149771	0.560701	0.289529	0.267113	0.516369	1.93315	0.176153	1.27635	0.407516	2397
IDH2	0.0243187	0.969811	0.00587002	0.0250757	0.00605275	0.241379	0.0249248	32.125	0.00590468	2385
Q9Y6V0-3	0.196195	0.747146	0.0566596	0.262592	0.0758347	0.288793	0.244082	2.95485	0.0600628	2365
NEB	0.219822	0.739941	0.0402372	0.297081	0.0543789	0.183044	0.281759	2.84528	0.0419241	2361
RET	0.233788	0.74872	0.0174915	0.312251	0.0233618	0.0748175	0.305122	2.97963	0.0178029	2344
NEB_ENST00000427231	0.226684	0.732729	0.0405872	0.309369	0.0553919	0.179048	0.293132	2.74152	0.0423042	2316
SPTA1	0.222802	0.722802	0.0543951	0.308248	0.0752559	0.244141	0.286674	2.60754	0.0575242	2298
GNAS	0.0188349	0.972843	0.00832238	0.0193606	0.00855471	0.44186	0.0191964	35.8226	0.00839223	2283
DNAH9	0.231986	0.724517	0.0434974	0.320194	0.0600364	0.1875	0.302059	2.62998	0.0454754	2276
LRP2	0.222026	0.731278	0.046696	0.303614	0.0638554	0.210317	0.285391	2.72131	0.0489834	2270
ABCA13	0.220705	0.738767	0.0405286	0.298748	0.0548599	0.183633	0.283211	2.82799	0.0422406	2270
ABCA13_ENST00000435803	0.220361	0.738211	0.0414279	0.298507	0.0561194	0.188	0.282646	2.81987	0.0432184	2269
ZNF717	0.140452	0.824103	0.0354453	0.17043	0.0430108	0.252366	0.163402	4.68514	0.0367478	2257
ZFHX4_ENST00000050961	0.243498	0.70852	0.0479821	0.343671	0.0677215	0.197053	0.321873	2.43077	0.0504004	2230
ABL1	0.0631199	0.920198	0.0166817	0.0685938	0.0181284	0.264286	0.0673725	11.5311	0.0169647	2218
AKAP13	0.335297	0.648391	0.0163117	0.517121	0.0251572	0.0486486	0.504431	1.84407	0.0165822	2207
ZNF717_ENST00000400845	0.140717	0.824784	0.0344984	0.170611	0.0418272	0.245161	0.163761	4.70725	0.0357311	2203
PKHD1L1	0.19144	0.764841	0.0437184	0.250301	0.05716	0.228365	0.236767	3.25245	0.045717	2173
AKAP13_ENST00000394518	0.339878	0.645161	0.0149603	0.526812	0.0231884	0.0440165	0.514873	1.81818	0.0151875	2139
HRAS	0.0548009	0.942389	0.0028103	0.0581511	0.00298211	0.0512821	0.0579782	16.3577	0.00281822	2135
CDKN2A	0.0672348	0.552083	0.380682	0.121784	0.689537	5.66197	0.0720812	1.23256	0.614679	2112
CSMD2	0.271564	0.69763	0.0308057	0.389266	0.0441576	0.113438	0.372804	2.30721	0.0317848	2110
FBXW7	0.023753	0.825653	0.150594	0.0287687	0.182394	6.34	0.0243309	4.73569	0.177293	2105
ZFHX3	0.260533	0.665375	0.074092	0.391557	0.111354	0.284387	0.352325	1.98842	0.0800209	2065
PLEC	0.32665	0.645966	0.0273839	0.505678	0.0423921	0.0838323	0.485113	1.82459	0.0281549	2045
PKHD1	0.251482	0.706522	0.041996	0.355944	0.0594406	0.166994	0.335974	2.40741	0.043837	2024
DNAH8	0.193963	0.738248	0.0677882	0.262735	0.0918231	0.34949	0.240638	2.82042	0.0727176	2021
DNAH8_ENST00000359357	0.196632	0.735513	0.0678554	0.26734	0.0922559	0.345088	0.24476	2.7809	0.0727949	2019
PTPRD	0.159216	0.789051	0.0517328	0.201782	0.0655633	0.324921	0.189367	3.74048	0.0545551	1991
PTPRT	0.17733	0.762217	0.0604534	0.23265	0.0793126	0.340909	0.215554	3.20551	0.0643432	1985
OBSCN_ENST00000359599	0.284274	0.688508	0.0272177	0.412884	0.0395315	0.0957447	0.397183	2.21036	0.0279793	1984
CSMD2_ENST00000373381	0.273604	0.695431	0.0309645	0.393431	0.0445255	0.113173	0.37666	2.28333	0.0319539	1970
PLEC_ENST00000436759	0.335878	0.635623	0.0284987	0.528423	0.0448359	0.0848485	0.505747	1.74441	0.0293347	1965
AHNAK	0.286588	0.684345	0.0290668	0.418778	0.0424739	0.101423	0.401716	2.16801	0.029937	1961
ATM_ENST00000278616	0.075462	0.782854	0.141684	0.0963934	0.180984	1.87755	0.0816213	3.6052	0.165072	1948
NF1_ENST00000358273	0.181159	0.573499	0.245342	0.315884	0.427798	1.35429	0.221239	1.34466	0.325103	1932
DNAH11	0.221762	0.712435	0.0658031	0.311273	0.0923636	0.296729	0.284953	2.47748	0.0704382	1930
DNAH7	0.202597	0.732468	0.0649351	0.276596	0.0886525	0.320513	0.254072	2.73786	0.0694444	1925
DNAH3	0.275468	0.672557	0.0519751	0.409583	0.0772798	0.188679	0.380201	2.05397	0.0548246	1924
LOC652153	0.238565	0.727131	0.0343035	0.328091	0.0471766	0.143791	0.313311	2.66476	0.0355221	1924
DNAH3_ENST00000261383	0.27624	0.67154	0.0522193	0.411353	0.0777605	0.189036	0.381674	2.04452	0.0550964	1915
PDGFRA	0.106227	0.867609	0.0261643	0.122437	0.0301568	0.246305	0.118852	6.55336	0.0268673	1911
PLEC_ENST00000345136	0.337368	0.633684	0.0289474	0.532392	0.0456811	0.0858034	0.509134	1.72989	0.0298103	1900
HYDIN_ENST00000316490	0.24076	0.724393	0.0348469	0.332362	0.048105	0.144737	0.317107	2.62835	0.036105	1894
PTPRD_ENST00000381196	0.161359	0.786624	0.052017	0.205128	0.0661269	0.322368	0.192405	3.68657	0.0548712	1884
CREBBP	0.125268	0.73394	0.140792	0.170678	0.191831	1.12393	0.143207	2.75855	0.163863	1868
RELN	0.23006	0.719479	0.0504612	0.319759	0.0701357	0.21934	0.298802	2.5648	0.0531429	1843
HERC2	0.270845	0.686649	0.0425068	0.394444	0.0619048	0.156942	0.37145	2.1913	0.0443939	1835
PLEC_ENST00000354958	0.343869	0.627793	0.0283379	0.547743	0.0451389	0.0824089	0.524086	1.68668	0.0291643	1835
SYNE2	0.200764	0.732133	0.0671031	0.274218	0.0916542	0.334239	0.251195	2.7332	0.0719298	1833
VHL	0.0496963	0.745997	0.204307	0.0666173	0.273871	4.11111	0.0522952	2.93696	0.256766	1811
GRIN2A	0.21108	0.750139	0.0387812	0.281388	0.0516987	0.183727	0.267556	3.00222	0.0403458	1805
ALK	0.153675	0.815145	0.0311804	0.188525	0.0382514	0.202899	0.181579	4.40964	0.0321839	1796
PLEC_ENST00000354589	0.347632	0.623955	0.0284123	0.557143	0.0455357	0.0817308	0.532878	1.65926	0.0292431	1795
DMD_ENST00000378677	0.189069	0.729504	0.0814278	0.259174	0.111621	0.430678	0.23315	2.69691	0.088646	1793
FMN2	0.3125	0.657924	0.0295759	0.474979	0.0449534	0.0946429	0.454545	1.92333	0.0304773	1792
SMAD4	0.0337268	0.761102	0.205171	0.0443131	0.269572	6.08333	0.034904	3.18588	0.258133	1779
PLEC_ENST00000356346	0.345894	0.625422	0.0286839	0.553058	0.0458633	0.0829268	0.528805	1.66967	0.029531	1778
DMD_ENST00000378687	0.185771	0.73179	0.0824393	0.253858	0.112654	0.443769	0.228155	2.72842	0.0898462	1771
COL6A3	0.301641	0.664403	0.0339559	0.454003	0.0511073	0.11257	0.431929	1.97976	0.0351494	1767
ANK2	0.218535	0.73913	0.0423341	0.295666	0.0572755	0.193717	0.279649	2.83333	0.0442055	1748
DNAH17	0.329324	0.640321	0.0303551	0.514311	0.0474061	0.0921739	0.491033	1.78025	0.0313054	1746
ANK3	0.229799	0.719771	0.0504298	0.319268	0.0700637	0.219451	0.298363	2.56851	0.053108	1745
ERBB4	0.125289	0.811201	0.0635104	0.154448	0.0782918	0.506912	0.143234	4.29664	0.0678175	1732
CUBN	0.245502	0.71155	0.0429483	0.345024	0.0603589	0.174941	0.325385	2.4668	0.0448757	1723
DNAH10_ENST00000409039	0.256977	0.69593	0.047093	0.369256	0.0676692	0.183258	0.345853	2.28872	0.0494204	1720
RP1L1	0.226163	0.737209	0.0366279	0.306782	0.0496845	0.161954	0.292261	2.80531	0.0380205	1720
PTPRT_ENST00000373184	0.1875	0.749416	0.0630841	0.250195	0.0841777	0.336449	0.230769	2.99068	0.0673317	1712
POLE	0.115882	0.85	0.0341176	0.136332	0.0401384	0.294416	0.131071	5.66667	0.0353228	1700
AHNAK_ENST00000378024	0.305195	0.669421	0.0253837	0.455908	0.0379189	0.0831721	0.439252	2.025	0.0260448	1694
BRCA2	0.118935	0.784024	0.0970414	0.151698	0.123774	0.81592	0.13499	3.63014	0.107471	1690
DST_ENST00000370769	0.189881	0.742857	0.0672619	0.255609	0.0905449	0.354232	0.234386	2.88889	0.0721123	1680
IGFN1_ENST00000335211	0.21288	0.767442	0.019678	0.277389	0.025641	0.092437	0.270455	3.3	0.020073	1677
FAT2	0.265428	0.67166	0.0629119	0.395183	0.0936664	0.23702	0.361338	2.04562	0.0671355	1669
PCDH15	0.213036	0.731442	0.055522	0.291254	0.0759076	0.260623	0.270706	2.7236	0.0587859	1657
DMD_ENST00000357033	0.188485	0.727273	0.0842424	0.259167	0.115833	0.446945	0.232263	2.66667	0.0919921	1650
CACNA1E	0.264403	0.699212	0.0363857	0.378144	0.0520382	0.137615	0.359439	2.3246	0.0377596	1649
DSCAM	0.301337	0.665249	0.0334143	0.452968	0.0502283	0.110887	0.431304	1.9873	0.0345695	1646
PCDH15_ENST00000417177	0.214155	0.729713	0.0561318	0.293478	0.0769231	0.262108	0.272516	2.69977	0.0594699	1639
DNAH2	0.242665	0.697433	0.0599022	0.34794	0.0858896	0.246851	0.32042	2.30505	0.0637191	1636
KCNJ12	0.255058	0.738811	0.00613121	0.345228	0.00829876	0.0240385	0.342387	2.82864	0.00616903	1631
PDE4DIP	0.173833	0.777641	0.0485258	0.223539	0.0624013	0.279152	0.210409	3.49724	0.0510006	1628
SPEN	0.180976	0.728845	0.0901791	0.248305	0.123729	0.498294	0.220965	2.68793	0.0991174	1619
NOTCH2	0.138768	0.749844	0.111388	0.185062	0.148548	0.802691	0.161127	2.99751	0.12535	1607
LAMA1	0.260137	0.700561	0.0393013	0.371327	0.0560997	0.151079	0.351602	2.33958	0.0409091	1603
PLEC_ENST00000357649	0.343809	0.624136	0.0320553	0.550856	0.0513595	0.0932358	0.523946	1.66054	0.0331169	1591
CSMD1_ENST00000539096	0.281486	0.680101	0.0384131	0.413889	0.0564815	0.136465	0.391762	2.12598	0.0399476	1588
HERC2_ENST00000261609	0.285443	0.674051	0.0405063	0.423474	0.0600939	0.141907	0.399469	2.06796	0.0422164	1580
RP1	0.186827	0.773908	0.0392654	0.241408	0.0507365	0.210169	0.229751	3.42297	0.0408701	1579
COL11A1	0.168889	0.789841	0.0412698	0.213826	0.0522508	0.244361	0.203209	3.75831	0.0430464	1575
ERBB2	0.0816847	0.903638	0.0146777	0.0903955	0.0162429	0.179687	0.0889507	9.37748	0.0148964	1567
RNF213_ENST00000411702	0.292761	0.682255	0.024984	0.429108	0.0366197	0.0853392	0.413949	2.14718	0.0256242	1561
LRP1	0.293137	0.677357	0.0295061	0.432765	0.0435606	0.100656	0.414701	2.0994	0.0304032	1559
TNXB_ENST00000375247	0.271502	0.709243	0.0192555	0.382805	0.0271493	0.070922	0.372687	2.43929	0.0196335	1558
ASXL1	0.1491	0.533419	0.317481	0.279518	0.595181	2.12931	0.175227	1.14325	0.46516	1556
DNAH17_ENST00000389840	0.34126	0.627892	0.0308483	0.543501	0.04913	0.0903955	0.518049	1.68739	0.0318302	1556
DNAH11_ENST00000328843	0.224952	0.719457	0.0555915	0.312668	0.0772686	0.247126	0.290242	2.56452	0.0588638	1547
ATRX	0.0835492	0.715026	0.201425	0.116848	0.281703	2.41085	0.0911661	2.50909	0.25223	1544
ROS1	0.13545	0.801685	0.0628645	0.168957	0.0784155	0.464115	0.156672	4.04248	0.0670816	1543
MXRA5	0.258127	0.706762	0.0351105	0.365225	0.049678	0.13602	0.34794	2.4102	0.0363881	1538
PKHD1_ENST00000340994	0.260247	0.700065	0.0396877	0.371747	0.0566914	0.1525	0.351803	2.33406	0.0413279	1537
MAGEC1	0.19544	0.77785	0.0267101	0.251256	0.0343384	0.136667	0.242915	3.50147	0.0274431	1535
MXRA5_ENST00000381114	0.260614	0.704115	0.0352711	0.37013	0.0500928	0.135338	0.352473	2.37969	0.0365606	1531
COL11A1_ENST00000370096	0.170046	0.788097	0.0418574	0.215768	0.053112	0.246154	0.204886	3.71914	0.043686	1529
CACNA1E_ENST00000367573	0.260955	0.700458	0.0385873	0.372549	0.0550887	0.14787	0.353097	2.33843	0.0401361	1529
MTOR	0.137615	0.821101	0.0412844	0.167598	0.0502793	0.3	0.159574	4.58974	0.0430622	1526
TNXB_ENST00000375244	0.270696	0.709593	0.0197109	0.381481	0.0277778	0.0728155	0.371171	2.44344	0.0201072	1522
LAMA2	0.214615	0.714944	0.0704411	0.300184	0.0985267	0.328221	0.273261	2.50808	0.075779	1519
MDN1	0.1967	0.744554	0.0587459	0.264184	0.0789007	0.298658	0.244864	2.91473	0.0624123	1515
HLA-A	0.231683	0.714851	0.0534653	0.3241	0.0747922	0.230769	0.301546	2.50694	0.0564854	1515
CARD11	0.193399	0.774257	0.0323432	0.249787	0.0417732	0.167235	0.239771	3.42982	0.0334243	1515
EP300	0.0909699	0.776589	0.132441	0.11714	0.170543	1.45588	0.100074	3.47605	0.15266	1495
SMARCA4	0.137399	0.752681	0.10992	0.182547	0.146037	0.8	0.159285	3.04336	0.123494	1492
VCAN	0.220509	0.731903	0.0475871	0.301282	0.0650183	0.215805	0.282889	2.73	0.0499648	1492
FLG2	0.246144	0.68947	0.0643863	0.357004	0.0933852	0.26158	0.326512	2.2203	0.0688172	1491
BCLAF1_ENST00000531224	0.225806	0.745968	0.0282258	0.302703	0.0378378	0.125	0.291667	2.93651	0.0290456	1488
KMT2A	0.181696	0.742261	0.0760431	0.244787	0.102448	0.418519	0.222039	2.8799	0.0823015	1486
PAPPA2	0.228475	0.724068	0.0474576	0.315543	0.0655431	0.207715	0.296134	2.62408	0.0498221	1475
CDC27	0.1981	0.755088	0.0468114	0.262354	0.0619946	0.236301	0.247039	3.0831	0.0491103	1474
FRAS1_ENST00000264895	0.24898	0.706122	0.044898	0.352601	0.0635838	0.180328	0.331522	2.40278	0.0470085	1470
BRCA2_ENST00000544455	0.130464	0.784836	0.0846995	0.166232	0.10792	0.649215	0.150039	3.64762	0.0925373	1464
CDC27_ENST00000531206	0.197539	0.755981	0.0464798	0.261302	0.0614828	0.235294	0.246167	3.09804	0.0487455	1463
SACS	0.193703	0.739904	0.0663929	0.261795	0.0897317	0.342756	0.240238	2.84474	0.0711144	1461
PCDH15_ENST00000414778	0.214973	0.731456	0.0535714	0.293897	0.0732394	0.249201	0.273841	2.72379	0.0566038	1456
PTPRD_ENST00000355233	0.159201	0.784287	0.0565127	0.202988	0.0720562	0.354978	0.189344	3.63578	0.0598977	1451
DNAH8_ENST00000449981	0.216609	0.721107	0.0622837	0.300384	0.0863724	0.28754	0.276502	2.58561	0.0664207	1445
FBN2_ENST00000508053	0.23391	0.723183	0.0429066	0.323445	0.0593301	0.183432	0.30533	2.6125	0.0448301	1445
KCNJ5	0.0465278	0.949306	0.00416667	0.0490124	0.00438917	0.0895522	0.0487983	18.726	0.0041841	1440
ZNF536	0.269632	0.702571	0.0277971	0.383778	0.0395648	0.103093	0.369172	2.36215	0.0285919	1439
MACF1_ENST00000361689	0.191207	0.727844	0.0809491	0.262704	0.111218	0.423358	0.236411	2.67436	0.088079	1433
FBN2	0.231092	0.72549	0.0434174	0.318533	0.0598456	0.187879	0.300546	2.64286	0.045388	1428
MLL_ENST00000534358	0.182328	0.741935	0.0757363	0.245747	0.102079	0.415385	0.222985	2.875	0.0819423	1426
DCHS2	0.241573	0.709972	0.0484551	0.340257	0.0682493	0.200581	0.318519	2.44794	0.0509225	1424
ROS1_ENST00000368507	0.134926	0.801827	0.0632467	0.168273	0.0788782	0.46875	0.155971	4.0461	0.0675169	1423
FRAS1	0.248067	0.706957	0.0449754	0.350895	0.0636183	0.181303	0.329907	2.41247	0.0470935	1423
SI	0.156932	0.76988	0.0731879	0.203839	0.095064	0.466368	0.186144	3.34557	0.0789674	1421
NSD1	0.295487	0.642454	0.0620592	0.459934	0.0965971	0.210024	0.419419	1.79684	0.0661654	1418
HSPG2	0.301341	0.671842	0.0268172	0.448529	0.039916	0.088993	0.431313	2.04731	0.0275562	1417
TRRAP	0.293701	0.68436	0.0219391	0.429162	0.0320579	0.0746988	0.415832	2.16816	0.0224313	1413
FAM135B	0.225852	0.741477	0.0326705	0.304598	0.0440613	0.144654	0.291743	2.86813	0.0337739	1408
LOC51059	0.225852	0.741477	0.0326705	0.304598	0.0440613	0.144654	0.291743	2.86813	0.0337739	1408
NSD1_ENST00000439151	0.297297	0.640825	0.0618777	0.463929	0.0965594	0.208134	0.423077	1.78416	0.0659591	1406
PTPRD_ENST00000346816	0.159317	0.783784	0.056899	0.203267	0.0725953	0.357143	0.189509	3.625	0.0603318	1406
CMYA5_ENST00000446378	0.225232	0.712758	0.06201	0.316	0.087	0.275316	0.290708	2.48139	0.0661094	1403
TG	0.233571	0.719286	0.0471429	0.324727	0.0655412	0.201835	0.304753	2.56234	0.0494753	1400
SACS_ENST00000382298	0.201573	0.734096	0.0643317	0.274586	0.0876339	0.319149	0.252462	2.76075	0.0687548	1399
SDK1	0.289191	0.682176	0.0286328	0.423924	0.0419727	0.0990099	0.406848	2.1464	0.0294768	1397
MACF1	0.184626	0.742098	0.0732759	0.24879	0.0987415	0.396887	0.226432	2.87744	0.0790698	1392
PTPRD_ENST00000537002	0.16092	0.783046	0.0560345	0.205505	0.0715596	0.348214	0.191781	3.60927	0.0593607	1392
FLNC	0.292297	0.686105	0.0215983	0.426023	0.0314795	0.0738916	0.413021	2.18578	0.0220751	1389
TRRAP_ENST00000359863	0.29233	0.685239	0.0224313	0.42661	0.032735	0.0767327	0.413088	2.17701	0.022946	1382
NAV3	0.181159	0.763768	0.0550725	0.237192	0.0721063	0.304	0.221239	3.23313	0.0582822	1380
UBR4	0.255983	0.701958	0.0420595	0.364669	0.0599174	0.164306	0.344055	2.35523	0.0439061	1379
KDR	0.144	0.798545	0.0574545	0.180328	0.071949	0.39899	0.168224	3.9639	0.0609568	1375
SVEP1	0.228364	0.740364	0.0312727	0.308448	0.0422397	0.136943	0.295947	2.85154	0.0322823	1375
UNC13C	0.203933	0.721777	0.0742899	0.282543	0.102926	0.364286	0.256176	2.59424	0.0802518	1373
PEG3	0.224326	0.72469	0.0509832	0.309548	0.0703518	0.227273	0.289202	2.63228	0.0537222	1373
MYO18B	0.258017	0.703353	0.0386297	0.366839	0.0549223	0.149718	0.347741	2.37101	0.040182	1372
ODZ3	0.248724	0.717724	0.0335522	0.346545	0.046748	0.134897	0.331068	2.54264	0.034717	1371
ZIM2_ENST00000326441	0.223848	0.724945	0.051207	0.308779	0.0706357	0.228758	0.288407	2.63564	0.0539707	1367
DST_ENST00000244364	0.201027	0.727073	0.0719002	0.276488	0.09889	0.357664	0.251607	2.66398	0.0774704	1363
PTPRD_ENST00000397617	0.162122	0.781135	0.0567428	0.207547	0.0726415	0.35	0.193492	3.56902	0.0601563	1357
LAMA5	0.314159	0.665929	0.0199115	0.471761	0.0299003	0.0633803	0.458065	1.99338	0.020316	1356
FREM2	0.242245	0.717134	0.0406204	0.337796	0.0566426	0.167683	0.319688	2.53525	0.0423403	1354
SPHKAP_ENST00000392056	0.217873	0.742984	0.0391433	0.293241	0.0526839	0.179661	0.278565	2.8908	0.0407379	1354
PTPN11	0.0546529	0.929838	0.0155096	0.0587768	0.0166799	0.283784	0.0578125	13.2526	0.0157539	1354
EYS_ENST00000370621	0.174203	0.7702	0.0555967	0.226179	0.0721848	0.319149	0.210952	3.35161	0.0588697	1349
SPHKAP	0.215875	0.744065	0.0400593	0.29013	0.0538385	0.185567	0.275307	2.90725	0.0417311	1348
PBRM1	0.248143	0.482169	0.269688	0.514638	0.559322	1.08683	0.33004	0.931133	0.369278	1346
UNC13C_ENST00000260323	0.200594	0.725111	0.0742942	0.276639	0.102459	0.37037	0.250929	2.63784	0.0802568	1346
ATRX_ENST00000373344	0.091586	0.728965	0.179449	0.125638	0.24617	1.95935	0.10082	2.68956	0.218693	1343
PREX2	0.226359	0.734177	0.0394639	0.308316	0.0537525	0.174342	0.292589	2.7619	0.0410853	1343
NCOR1	0.121257	0.738024	0.140719	0.1643	0.190669	1.16049	0.13799	2.81714	0.163763	1336
NRXN1_ENST00000406316	0.260674	0.692884	0.0464419	0.376216	0.067027	0.178161	0.352584	2.2561	0.0487038	1335
BAI3	0.217391	0.730885	0.0517241	0.297436	0.0707692	0.237931	0.277778	2.71588	0.0545455	1334
EP400	0.402851	0.564141	0.0330083	0.714096	0.0585106	0.0819367	0.674623	1.29432	0.034135	1333
GPR112	0.236309	0.732183	0.0315079	0.322746	0.0430328	0.133333	0.30943	2.73389	0.0325329	1333
KIAA1109	0.192192	0.756757	0.0510511	0.253968	0.0674603	0.265625	0.237918	3.11111	0.0537975	1332
COL22A1	0.229902	0.727273	0.0428249	0.316116	0.0588843	0.186275	0.298537	2.66667	0.044741	1331
NRXN1_ENST00000536085	0.251128	0.7	0.0488722	0.358754	0.0698174	0.194611	0.335341	2.33333	0.0513834	1330
VPS13B	0.222892	0.711596	0.065512	0.313228	0.0920635	0.293919	0.286822	2.46736	0.0701048	1328
MYH2	0.262443	0.690045	0.0475113	0.380328	0.0688525	0.181034	0.355828	2.22628	0.0498812	1326
ERBB4_ENST00000402597	0.138218	0.791541	0.0702417	0.174618	0.0887405	0.508197	0.160386	3.7971	0.0755483	1324
ODZ1	0.235828	0.718065	0.0461073	0.328421	0.0642105	0.195513	0.308605	2.54692	0.048336	1323
SETBP1	0.221548	0.748103	0.030349	0.296146	0.040568	0.136986	0.2846	2.96988	0.0312989	1318
SCN10A	0.288535	0.672741	0.0387244	0.428894	0.0575621	0.134211	0.40555	2.05568	0.0402844	1317
VPS13B_ENST00000357162	0.228137	0.707985	0.0638783	0.322234	0.0902256	0.28	0.295567	2.42448	0.0682372	1315
NOTCH3	0.177186	0.76654	0.0562738	0.231151	0.0734127	0.317597	0.215342	3.28339	0.0596293	1315
ZAN_ENST00000542585	0.274525	0.695817	0.0296578	0.394536	0.042623	0.108033	0.378407	2.2875	0.0305643	1315
MYO15A	0.296494	0.679116	0.0243902	0.436588	0.0359147	0.0822622	0.421452	2.11639	0.025	1312
SETD2_ENST00000409792	0.0778626	0.682443	0.239695	0.114094	0.35123	3.07843	0.0844371	2.14904	0.315261	1310
MYH1	0.245601	0.710788	0.0436113	0.345533	0.0613563	0.17757	0.325558	2.45767	0.0456	1307
SMARCA4_ENST00000358026	0.150077	0.762634	0.0872894	0.196787	0.114458	0.581633	0.176577	3.2129	0.0956376	1306
HLA-A_ENST00000376806	0.226646	0.719755	0.0535988	0.314894	0.0744681	0.236486	0.293069	2.56831	0.0566343	1306
DYNC1H1	0.253067	0.700153	0.0467791	0.361446	0.0668127	0.184848	0.338809	2.33504	0.0490748	1304
ATR	0.152724	0.773599	0.0736761	0.197421	0.0952381	0.482412	0.180254	3.41695	0.079536	1303
FBN3	0.289799	0.683926	0.0262751	0.423729	0.0384181	0.0906667	0.408052	2.16381	0.0269841	1294
CDH23	0.287481	0.693199	0.0193199	0.414716	0.0278707	0.0672043	0.403471	2.25945	0.0197006	1294
BIRC6	0.169374	0.761021	0.0696056	0.222561	0.0914634	0.410959	0.203911	3.18447	0.074813	1293
FBXW7_ENST00000281708	0.0380435	0.789596	0.17236	0.0481809	0.218289	4.53061	0.039548	3.75277	0.208255	1288
MGAM_ENST00000475668	0.268065	0.6892	0.042735	0.388952	0.0620068	0.15942	0.366242	2.2175	0.0446429	1287
UNC79	0.233877	0.727273	0.03885	0.321581	0.0534188	0.166113	0.305274	2.66667	0.0404204	1287
MET	0.184723	0.773967	0.0413094	0.238671	0.0533736	0.223629	0.226577	3.42414	0.0430894	1283
TAF1L	0.25643	0.705378	0.0381917	0.363536	0.0541436	0.148936	0.344864	2.39418	0.0397083	1283
CMYA5	0.216069	0.721529	0.0624025	0.299459	0.0864865	0.288809	0.275622	2.59104	0.0665557	1282
COL12A1	0.192969	0.753906	0.053125	0.255959	0.0704663	0.275304	0.239109	3.06349	0.0561056	1280
C1orf173	0.205629	0.750586	0.0437842	0.273958	0.0583333	0.212928	0.258858	3.0094	0.045789	1279
DCC	0.224745	0.703211	0.0720439	0.319599	0.10245	0.320557	0.289899	2.36939	0.0776371	1277
BIRC6_ENST00000421745	0.170846	0.761755	0.0673981	0.22428	0.0884774	0.394495	0.206049	3.19737	0.0722689	1276
NBEA	0.186667	0.744314	0.0690196	0.25079	0.0927292	0.369748	0.229508	2.91104	0.0741365	1275
ARID2	0.0918367	0.603611	0.304553	0.152146	0.504551	3.31624	0.101124	1.52277	0.437923	1274
KALRN_ENST00000360013	0.265354	0.684252	0.0503937	0.387802	0.0736479	0.189911	0.3612	2.16708	0.053068	1270
TCHH	0.185973	0.780142	0.0338849	0.238384	0.0434343	0.182203	0.228461	3.54839	0.0350734	1269
PBRM1_ENST00000296302	0.270505	0.491325	0.23817	0.550562	0.484751	0.880466	0.370811	0.965891	0.312629	1268
NOTCH3_ENST00000263388	0.175868	0.768927	0.055205	0.228718	0.0717949	0.313901	0.213397	3.32765	0.0584307	1268
SETD2	0.0720507	0.692003	0.235946	0.104119	0.340961	3.27473	0.0776451	2.24679	0.308808	1263
KIAA1409	0.225318	0.729299	0.0453822	0.308952	0.0622271	0.201413	0.290853	2.69412	0.0475396	1256
SRSF2	0.173705	0.822311	0.00398406	0.21124	0.00484496	0.0229358	0.210222	4.6278	0.004	1255
C15orf2	0.26555	0.712121	0.0223285	0.3729	0.031355	0.0840841	0.361564	2.47368	0.0228385	1254
CNTNAP2	0.232129	0.722892	0.0449799	0.321111	0.0622222	0.193772	0.302301	2.6087	0.0470984	1245
EPHA3	0.157005	0.772142	0.0708535	0.203337	0.0917623	0.451282	0.186246	3.38869	0.0762565	1242
NRXN1_ENST00000404971	0.250403	0.700483	0.0491143	0.357471	0.0701149	0.196141	0.334049	2.33871	0.0516511	1242
PLXNA4_ENST00000321063	0.289516	0.685484	0.025	0.422353	0.0364706	0.086351	0.407491	2.17949	0.025641	1240
ODZ2_ENST00000518659	0.282258	0.695161	0.0225806	0.406032	0.0324826	0.08	0.393258	2.28042	0.0231023	1240
PCDH15_ENST00000395438	0.229217	0.719935	0.0508475	0.318386	0.0706278	0.221831	0.297382	2.57061	0.0535714	1239
FBXW7_NM_018315_2	0.0436893	0.796117	0.160194	0.054878	0.20122	3.66667	0.0456853	3.90476	0.190751	1236
AR	0.116694	0.834684	0.0486224	0.139806	0.0582524	0.416667	0.13211	5.04902	0.0511073	1234
STAB2	0.264228	0.690244	0.0455285	0.382803	0.06596	0.172308	0.359116	2.22835	0.0477002	1230
MKI67	0.234337	0.71847	0.0471928	0.326161	0.0656852	0.201389	0.306057	2.55202	0.0495303	1229
ASPM	0.200326	0.732085	0.0675896	0.273637	0.0923248	0.337398	0.250509	2.73252	0.0724891	1228
PXDNL_ENST00000356297	0.235487	0.717907	0.0466067	0.328018	0.0649203	0.197917	0.308021	2.54493	0.0488851	1223
UBR4_ENST00000375267	0.259411	0.702946	0.0376432	0.369034	0.0535506	0.14511	0.350276	2.36639	0.0391156	1222
ACAN	0.24918	0.727049	0.0237705	0.342728	0.0326945	0.0953947	0.331878	2.66366	0.0243493	1220
PLXNA4_ENST00000359827	0.293683	0.683347	0.0229696	0.429772	0.0336134	0.0782123	0.415796	2.15803	0.0235097	1219
HLA-DRB1	0.146962	0.844007	0.0090312	0.174125	0.0107004	0.0614525	0.172281	5.41053	0.0091135	1218
VWF	0.285949	0.681183	0.0328677	0.419783	0.0482509	0.114943	0.40046	2.1366	0.0339847	1217
RB1	0.0477759	0.443987	0.508237	0.107607	1.14471	10.6379	0.050173	0.798519	1.0335	1214
CNTNAP5	0.25	0.682343	0.0676568	0.366385	0.0991536	0.270627	0.333333	2.14805	0.0725664	1212
DOCK2	0.247107	0.713223	0.0396694	0.346466	0.0556199	0.160535	0.328211	2.48703	0.0413081	1210
CACNA1C	0.317618	0.641026	0.0413565	0.495484	0.0645161	0.130208	0.465455	1.78571	0.0431406	1209
PRUNE2_ENST00000376718	0.219371	0.735927	0.044702	0.298088	0.0607424	0.203774	0.281018	2.78683	0.0467938	1208
PBRM1_ENST00000356770	0.281924	0.483416	0.23466	0.58319	0.48542	0.832353	0.39261	0.935795	0.306609	1206
SCN1A	0.241294	0.690713	0.0679934	0.34934	0.0984394	0.281787	0.318033	2.23324	0.0729537	1206
SCN5A	0.304312	0.660033	0.0356551	0.461055	0.0540201	0.117166	0.437426	1.94146	0.0369733	1206
MPL	0.053112	0.929461	0.0174274	0.0571429	0.01875	0.328125	0.0560911	13.1765	0.0177365	1205
ODZ4	0.263508	0.705736	0.0307564	0.37338	0.0435807	0.116719	0.357788	2.39831	0.0317324	1203
SPEG	0.261885	0.693912	0.0442035	0.377404	0.0637019	0.16879	0.354802	2.26703	0.0462478	1199
BSN	0.245409	0.731219	0.0233723	0.335616	0.0319635	0.0952381	0.325221	2.7205	0.0239316	1198
HUWE1	0.213033	0.752715	0.0342523	0.283019	0.045505	0.160784	0.270701	3.04392	0.0354671	1197
DNAH1_ENST00000420323	0.273411	0.698161	0.0284281	0.391617	0.0407186	0.103976	0.376295	2.31302	0.0292599	1196
ZNF831	0.253143	0.697402	0.0494552	0.362981	0.0709135	0.195364	0.338945	2.30471	0.0520282	1193
EPHA5	0.146096	0.79513	0.0587741	0.183738	0.0739176	0.402299	0.171091	3.88115	0.0624442	1191
ANKRD30A	0.221008	0.731092	0.0478992	0.302299	0.0655172	0.21673	0.283711	2.71875	0.0503089	1190
MYCBP2_ENST00000357337	0.199831	0.738617	0.0615514	0.270548	0.0833333	0.308017	0.249737	2.82581	0.0655885	1186
MGAM_ENST00000473011	0.256128	0.69738	0.046492	0.367273	0.0666667	0.181518	0.344318	2.30447	0.0487589	1183
ODZ4_ENST00000278550	0.2612	0.707523	0.0312764	0.369176	0.0442055	0.119741	0.353547	2.41908	0.0322862	1183
EZH2	0.0482642	0.893311	0.0584251	0.0540284	0.0654028	1.21053	0.0507117	8.37302	0.0620504	1181
HUWE1_ENST00000342160	0.223919	0.742154	0.0339271	0.301714	0.0457143	0.151515	0.288525	2.87829	0.0351185	1179
AGC1	0.246819	0.728584	0.0245971	0.338766	0.0337602	0.0996564	0.327703	2.68437	0.0252174	1179
COL5A1	0.287171	0.68989	0.0229397	0.416256	0.0332512	0.0798817	0.402861	2.22466	0.0234783	1177
MYH4	0.256803	0.691327	0.0518707	0.371464	0.0750308	0.201987	0.345538	2.23967	0.0547085	1176
ANKRD36_ENST00000420699	0.102891	0.877551	0.0195578	0.117248	0.0222868	0.190083	0.114692	7.16667	0.019948	1176
CACNA1C_ENST00000344100	0.31234	0.646809	0.0408511	0.482895	0.0631579	0.13079	0.454208	1.83133	0.0425909	1175
THSD7B	0.193356	0.726576	0.0800681	0.26612	0.110199	0.414097	0.239704	2.65732	0.087037	1174
PIK3CG	0.211424	0.751918	0.0366581	0.281179	0.0487528	0.173387	0.268108	3.03093	0.0380531	1173
DNAH10_same_name	0.278395	0.684031	0.0375747	0.406991	0.0549313	0.134969	0.385799	2.16486	0.0390417	1171
DNAH1	0.272027	0.699743	0.0282293	0.388753	0.0403423	0.103774	0.373678	2.33048	0.0290493	1169
BCOR	0.237158	0.60274	0.160103	0.393466	0.265625	0.67509	0.310887	1.51724	0.190622	1168
PTCH1	0.16524	0.67637	0.15839	0.244304	0.234177	0.958549	0.197949	2.08995	0.188199	1168
ADAMTS12	0.234589	0.723459	0.0419521	0.32426	0.0579882	0.178832	0.306488	2.6161	0.0437891	1168
TNR	0.281545	0.67382	0.0446352	0.417834	0.066242	0.158537	0.391876	2.06579	0.0467206	1165
ODZ2	0.282403	0.694421	0.023176	0.406675	0.0333745	0.0820669	0.393541	2.27247	0.0237258	1165
MGAM_ENST00000549489	0.256014	0.697595	0.0463918	0.366995	0.0665025	0.181208	0.344111	2.30682	0.0486486	1164
NALCN	0.236457	0.709372	0.0541702	0.333333	0.0763636	0.229091	0.309685	2.44083	0.0572727	1163
HERC1	0.224613	0.722031	0.0533563	0.311085	0.0738975	0.237548	0.289678	2.59752	0.0563636	1162
MYH8	0.274763	0.677864	0.047373	0.405337	0.0698856	0.172414	0.37886	2.10428	0.0497288	1161
DMBT1_ENST00000368915	0.248276	0.706897	0.0448276	0.35122	0.0634146	0.180556	0.330275	2.41176	0.0469314	1160
NOTCH4	0.215517	0.747414	0.037069	0.288351	0.0495963	0.172	0.274725	2.95904	0.038496	1160
MYCBP2_ENST00000407578	0.199482	0.740069	0.0604491	0.269545	0.0816803	0.30303	0.249191	2.84718	0.0643382	1158
LPA	0.26943	0.677029	0.0535406	0.397959	0.0790816	0.198718	0.368794	2.09626	0.0565693	1158
ANKRD11	0.247841	0.715026	0.037133	0.346618	0.0519324	0.149826	0.329506	2.50909	0.038565	1158
CACNA1E_ENST00000367567	0.265341	0.701815	0.0328436	0.378079	0.046798	0.123779	0.361176	2.35362	0.0339589	1157
TECTA	0.326106	0.6366	0.037294	0.512262	0.0585831	0.114362	0.483912	1.75179	0.0387387	1153
NRXN1_ENST00000402717	0.253472	0.698785	0.0477431	0.362733	0.068323	0.188356	0.339535	2.31988	0.0501367	1152
ABCA12	0.218832	0.733217	0.0479512	0.298454	0.0653983	0.219124	0.280134	2.74837	0.0503663	1147
POLE_ENST00000320574	0.158813	0.80541	0.0357766	0.197183	0.0444204	0.225275	0.188797	4.13901	0.0371041	1146
TENM1	0.253275	0.69869	0.0480349	0.3625	0.06875	0.189655	0.339181	2.31884	0.0504587	1145
ARID1B	0.179196	0.698427	0.122378	0.256571	0.175219	0.682927	0.218317	2.31594	0.139442	1144
MACF1_ENST00000317713	0.191434	0.725524	0.083042	0.263855	0.114458	0.43379	0.236757	2.64331	0.0905624	1144
HERC1_ENST00000443617	0.221154	0.725524	0.0533217	0.304819	0.073494	0.241107	0.283951	2.64331	0.056325	1144
DMBT1_ENST00000368909	0.24606	0.708406	0.0455342	0.347342	0.0642769	0.185053	0.326365	2.42943	0.0477064	1142
PCNT	0.234676	0.740806	0.0245184	0.316785	0.0330969	0.104478	0.306636	2.85811	0.0251346	1142
FBXW7_ENST00000296555	0.0333041	0.801052	0.165644	0.0415755	0.206783	4.97368	0.0344515	4.02643	0.198529	1141
ZNF208_ENST00000397126	0.204207	0.768624	0.0271691	0.265678	0.0353478	0.133047	0.256608	3.32197	0.0279279	1141
FBXW7_ENST00000534231	0.0307287	0.81475	0.154522	0.0377155	0.189655	5.02857	0.0317029	4.3981	0.182762	1139
TSC2	0.173111	0.709139	0.11775	0.244114	0.166047	0.680203	0.209352	2.43807	0.133466	1138
ZNF208	0.203345	0.770246	0.0264085	0.264	0.0342857	0.12987	0.255249	3.35249	0.0271248	1136
UBR4_ENST00000375217	0.25485	0.705467	0.0396825	0.36125	0.05625	0.155709	0.342012	2.39521	0.0413223	1134
SCN5A_ENST00000333535	0.30776	0.657848	0.0343915	0.467828	0.0522788	0.111748	0.444586	1.92268	0.0356164	1134
ENSG00000121031	0.252427	0.686673	0.0609003	0.367609	0.0886889	0.241259	0.337662	2.19155	0.0648496	1133
PCDH17	0.32626	0.647215	0.0265252	0.504098	0.0409836	0.0813008	0.484252	1.83459	0.027248	1131
LRRK2	0.189381	0.739823	0.0707965	0.255981	0.0956938	0.373832	0.233624	2.84354	0.0761905	1130
C12orf51	0.257522	0.70531	0.0371681	0.365119	0.0526976	0.14433	0.346841	2.39339	0.0386029	1130
SCN5A_ENST00000413689	0.308511	0.656028	0.035461	0.47027	0.0540541	0.114943	0.446154	1.90722	0.0367647	1128
ZNF208_ENST00000428290	0.203901	0.769504	0.0265957	0.264977	0.0345622	0.130435	0.256125	3.33846	0.0273224	1128
KDM6A	0.162811	0.58363	0.253559	0.278963	0.434451	1.55738	0.194474	1.40171	0.33969	1124
MYH7	0.30098	0.656278	0.0427427	0.458616	0.0651289	0.142012	0.430573	1.90933	0.0446512	1123
UNC13C_ENST00000545554	0.202498	0.73149	0.0660125	0.276829	0.0902439	0.325991	0.253915	2.72425	0.0706781	1121
DSCAML1	0.305085	0.667261	0.0276539	0.457219	0.0414439	0.0906433	0.439024	2.00536	0.0284404	1121
AKAP9	0.2	0.720536	0.0794643	0.277571	0.110285	0.397321	0.25	2.57827	0.086324	1120
FBN1	0.219643	0.728571	0.0517857	0.301471	0.0710784	0.235772	0.281465	2.68421	0.0546139	1120
CACNA1C_ENST00000399617	0.31932	0.641324	0.039356	0.497908	0.0613668	0.123249	0.46912	1.78803	0.0409683	1118
PRDM9	0.205909	0.735004	0.0590868	0.280146	0.0803898	0.286957	0.259301	2.77365	0.0627973	1117
RNF213	0.290063	0.68487	0.0250671	0.423529	0.0366013	0.0864198	0.408575	2.1733	0.0257117	1117
DICER1	0.107623	0.838565	0.0538117	0.128342	0.0641711	0.5	0.120603	5.19444	0.056872	1115
ERBB3	0.102242	0.864574	0.0331839	0.118257	0.0383817	0.324561	0.113886	6.38411	0.0343228	1115
EP400_ENST00000333577	0.413297	0.555256	0.0314465	0.744337	0.0566343	0.076087	0.704441	1.24848	0.0324675	1113
CIC	0.138489	0.784173	0.0773381	0.176606	0.0986239	0.558442	0.160752	3.63333	0.0838207	1112
SCN1A_ENST00000303395	0.242806	0.688849	0.0683453	0.35248	0.0992167	0.281481	0.320665	2.21387	0.0733591	1112
DMD_ENST00000378682	0.178539	0.738503	0.0829576	0.241758	0.112332	0.464646	0.217344	2.82414	0.0904621	1109
AKAP9_ENST00000356239	0.203787	0.716862	0.0793508	0.284277	0.110692	0.389381	0.255946	2.53185	0.08619	1109
C12orf51_ENST00000377560	0.254283	0.708747	0.0369702	0.358779	0.0521628	0.14539	0.340992	2.43344	0.0383895	1109
THSD7B_ENST00000413152	0.190605	0.727191	0.0822042	0.262112	0.113043	0.43128	0.235491	2.66556	0.0895669	1107
DSP	0.254973	0.694394	0.0506329	0.367188	0.0729167	0.198582	0.342233	2.27219	0.0533333	1106
DNAH6	0.188235	0.755656	0.0561086	0.249102	0.0742515	0.298077	0.231884	3.09259	0.0594439	1105
ODZ2_ENST00000519204	0.285068	0.694118	0.0208145	0.410691	0.029987	0.0730159	0.398734	2.26923	0.0212569	1105
NAV3_ENST00000397909	0.181324	0.769719	0.0489574	0.235571	0.0636042	0.27	0.221484	3.34252	0.0514776	1103
AKT1	0.049864	0.94379	0.00634633	0.0528338	0.0067243	0.127273	0.0524809	16.7903	0.00638686	1103
LRRK2_ENST00000298910	0.186933	0.742287	0.0707804	0.251834	0.0953545	0.378641	0.229911	2.88028	0.0761719	1102
CACNA1C_ENST00000347598	0.318512	0.638838	0.0426497	0.49858	0.0667614	0.133903	0.467377	1.76884	0.0445498	1102
GLI3	0.279599	0.687614	0.0327869	0.406623	0.0476821	0.117264	0.388116	2.20117	0.0338983	1098
RET_ENST00000340058	0.464481	0.508197	0.0273224	0.913978	0.0537634	0.0588235	0.867347	1.03333	0.0280899	1098
VPS13D	0.247263	0.711679	0.0410584	0.347436	0.0576923	0.166052	0.328485	2.46835	0.0428164	1096
PKD1L1	0.258447	0.703196	0.0383562	0.367532	0.0545455	0.14841	0.348522	2.36923	0.039886	1095
PTPRS	0.216438	0.757078	0.026484	0.285887	0.0349819	0.122363	0.276224	3.11654	0.0272045	1095
ASTN1	0.261905	0.698718	0.0393773	0.374836	0.0563565	0.15035	0.354839	2.31915	0.0409914	1092
NCOR1_ENST00000395851	0.12844	0.727523	0.144037	0.176545	0.197982	1.12143	0.147368	2.67003	0.168274	1090
COL6A6	0.23211	0.720183	0.0477064	0.322293	0.066242	0.205534	0.30227	2.57377	0.0500963	1090
DMBT1	0.247934	0.706152	0.0459137	0.351105	0.0650195	0.185185	0.32967	2.40312	0.0481232	1089
LAMA3	0.235023	0.729954	0.035023	0.32197	0.0479798	0.14902	0.307229	2.70307	0.0362942	1085
MYH13	0.288089	0.654663	0.0572484	0.440056	0.0874471	0.198718	0.404669	1.89572	0.0607248	1083
MYH13_ENST00000252172	0.287963	0.655556	0.0564815	0.439266	0.0861582	0.196141	0.404421	1.90323	0.0598626	1080
MED12_ENST00000374080	0.137037	0.811111	0.0518519	0.16895	0.0639269	0.378378	0.158798	4.29412	0.0546875	1080
DCHS1	0.241411	0.71402	0.0445682	0.338101	0.0624187	0.184615	0.318237	2.49675	0.0466472	1077
HECW1	0.280409	0.677809	0.0417827	0.413699	0.0616438	0.149007	0.389677	2.10375	0.0436047	1077
MGA	0.142326	0.677209	0.180465	0.210165	0.266484	1.26797	0.165944	2.09798	0.220204	1075
ADAMTS20_ENST00000389420	0.196462	0.733706	0.0698324	0.267766	0.0951777	0.35545	0.244496	2.75524	0.0750751	1074
DSPP	0.51306	0.475746	0.011194	1.07843	0.0235294	0.0218182	1.05364	0.907473	0.0113208	1072
ENSG00000174501	0.135768	0.820225	0.0440075	0.165525	0.053653	0.324138	0.157096	4.5625	0.0460333	1068
ADCY8	0.283037	0.683224	0.0337395	0.414266	0.0493827	0.119205	0.394771	2.1568	0.0349176	1067
PABPC1	0.0890347	0.884724	0.0262418	0.100636	0.029661	0.294737	0.0977366	7.6748	0.026949	1067
TET1_ENST00000373644	0.158685	0.784977	0.056338	0.202153	0.0717703	0.35503	0.188616	3.65066	0.0597015	1065
DYSF	0.301692	0.663534	0.0347744	0.454674	0.0524079	0.115265	0.432032	1.97207	0.0360273	1064
COL7A1	0.220132	0.750706	0.0291627	0.293233	0.0388471	0.132479	0.282268	3.01132	0.0300388	1063
UNC80_ENST00000439458	0.199623	0.741996	0.0583804	0.269036	0.0786802	0.292453	0.249412	2.87591	0.062	1062
LRRC7	0.229972	0.721018	0.0490104	0.318954	0.0679739	0.213115	0.298654	2.58446	0.0515362	1061
LYST	0.216242	0.723324	0.0604344	0.298956	0.0835509	0.279476	0.275904	2.61433	0.0643216	1059
GNAQ	0.0415486	0.915958	0.0424929	0.0453608	0.0463918	1.02273	0.0433498	10.8989	0.0443787	1059
TMEM132D	0.268178	0.693107	0.0387158	0.386921	0.0558583	0.144366	0.366452	2.25846	0.040275	1059
CACNA1B	0.313503	0.671388	0.0151086	0.466948	0.0225035	0.0481928	0.456671	2.0431	0.0153404	1059
HLA-B	0.171402	0.788826	0.0397727	0.217287	0.0504202	0.232044	0.206857	3.73543	0.0414201	1056
DIDO1	0.267552	0.694497	0.0379507	0.385246	0.0546448	0.141844	0.365285	2.27329	0.0394477	1054
ESR1	0.0969582	0.884981	0.0180608	0.10956	0.0204082	0.186275	0.107368	7.69421	0.018393	1052
CACNA1H_ENST00000358590	0.302569	0.661275	0.036156	0.457554	0.0546763	0.119497	0.433834	1.95225	0.0375123	1051
SCN11A	0.222857	0.718095	0.0590476	0.310345	0.0822281	0.264957	0.286765	2.5473	0.062753	1050
CELSR1	0.319048	0.650476	0.0304762	0.490483	0.0468521	0.0955224	0.468531	1.86104	0.0314342	1050
FGFR2	0.0809524	0.890476	0.0285714	0.0909091	0.0320856	0.352941	0.0880829	8.13043	0.0294118	1050
RUNX1	0.0574163	0.780861	0.161722	0.0735294	0.207108	2.81667	0.0609137	3.56332	0.192922	1045
HEATR7B2	0.249761	0.688995	0.061244	0.3625	0.0888889	0.245211	0.332908	2.21538	0.0652396	1045
ANKRD36	0.110153	0.8659	0.0239464	0.127212	0.0276549	0.217391	0.123789	6.45714	0.0245339	1044
DNMT3A_ENST00000380746	0.132438	0.777351	0.0902111	0.17037	0.116049	0.681159	0.152655	3.49138	0.0991561	1042
USP34	0.207493	0.731988	0.0605187	0.283465	0.0826772	0.291667	0.261818	2.73118	0.0644172	1041
LINC00273	0.117195	0.846302	0.0365034	0.138479	0.0431328	0.311475	0.132753	5.50625	0.0378863	1041
LINC00273_ENST00000539813	0.117195	0.846302	0.0365034	0.138479	0.0431328	0.311475	0.132753	5.50625	0.0378863	1041
FRY	0.242308	0.695192	0.0625	0.348548	0.0899032	0.257937	0.319797	2.28076	0.0666667	1040
EPHA7	0.164581	0.773821	0.0615977	0.212687	0.079602	0.374269	0.197005	3.42128	0.065641	1039
CTNND2	0.309913	0.646776	0.0433109	0.479167	0.0669643	0.139752	0.449093	1.83106	0.0452716	1039
CACNA1C_ENST00000399634	0.323699	0.634875	0.0414258	0.509863	0.0652504	0.127976	0.478632	1.73879	0.0432161	1038
CACNA1H	0.303468	0.660886	0.0356455	0.459184	0.0539359	0.11746	0.435685	1.94886	0.036963	1038
FLT4_ENST00000261937	0.257722	0.702703	0.0395753	0.366758	0.0563187	0.153558	0.347204	2.36364	0.041206	1036
OR4C3	0.124638	0.841546	0.0338164	0.148106	0.0401837	0.271318	0.142384	5.31098	0.035	1035
ADAMTS20	0.201355	0.728945	0.0696999	0.276228	0.0956175	0.346154	0.252121	2.68929	0.074922	1033
WDFY4	0.260407	0.702807	0.0367861	0.370523	0.0523416	0.141264	0.352094	2.36482	0.038191	1033
SCN1A_ENST00000423058	0.252907	0.68314	0.0639535	0.370213	0.093617	0.252874	0.338521	2.15596	0.068323	1032
TRIO	0.265504	0.702519	0.0319767	0.377931	0.0455172	0.120438	0.361478	2.36156	0.033033	1032
BCOR_ENST00000378444	0.261419	0.61516	0.123421	0.424961	0.200632	0.472119	0.353947	1.59848	0.140798	1029
F5	0.236152	0.724976	0.0388727	0.325737	0.0536193	0.164609	0.30916	2.63604	0.0404449	1029
PTPRB_ENST00000334414	0.259728	0.685798	0.0544747	0.378723	0.0794326	0.209738	0.350854	2.18266	0.0576132	1028
PDZD2	0.244163	0.722763	0.0330739	0.33782	0.0457604	0.135458	0.323037	2.60702	0.0342052	1028
SRCAP	0.213242	0.726388	0.06037	0.293566	0.0831099	0.283105	0.27104	2.6548	0.0642487	1027
DYSF_ENST00000410020	0.308666	0.657254	0.0340798	0.46963	0.0518519	0.11041	0.446479	1.91761	0.0352823	1027
ASXL3_ENST00000269197	0.212476	0.738791	0.0487329	0.287599	0.0659631	0.229358	0.269802	2.82836	0.0512295	1026
TENM2	0.286413	0.694037	0.0195503	0.412676	0.028169	0.0682594	0.40137	2.26837	0.0199402	1023
CACNA1E_ENST00000357570	0.244118	0.712745	0.0431373	0.342503	0.0605227	0.176707	0.322957	2.48123	0.045082	1020
COL6A5	0.233333	0.72549	0.0411765	0.321622	0.0567568	0.176471	0.304348	2.64286	0.0429448	1020
IGSF10	0.197835	0.752953	0.0492126	0.262745	0.0653595	0.248756	0.246626	3.04781	0.0517598	1016
ATP10A	0.286417	0.674213	0.0393701	0.424818	0.0583942	0.137457	0.401379	2.06949	0.0409836	1016
BRCA1	0.131034	0.784236	0.0847291	0.167085	0.10804	0.646617	0.150794	3.6347	0.0925727	1015
CELSR3	0.277833	0.689655	0.0325123	0.402857	0.0471429	0.117021	0.38472	2.22222	0.0336049	1015
ZNF804A	0.17357	0.775148	0.0512821	0.223919	0.0661578	0.295455	0.210024	3.44737	0.0540541	1014
ASXL1_ENST00000306058	0.202369	0.598223	0.199408	0.338284	0.333333	0.985366	0.253713	1.48894	0.249075	1013
UTRN	0.214215	0.721619	0.0641658	0.296854	0.0889193	0.299539	0.272613	2.5922	0.0685654	1013
SALL1	0.257905	0.714427	0.027668	0.360996	0.0387275	0.10728	0.347537	2.50173	0.0284553	1012
CACNA1A_ENST00000357018	0.305638	0.665678	0.0286845	0.459138	0.0430906	0.0938511	0.440171	1.99112	0.0295316	1011
GRIN2B	0.311573	0.66271	0.0257171	0.470149	0.038806	0.0825397	0.452586	1.96481	0.0263959	1011
MYO3A	0.210891	0.734653	0.0544554	0.287062	0.074124	0.258216	0.267252	2.76866	0.0575916	1010
PKD1	0.272547	0.714569	0.012884	0.381415	0.0180305	0.0472727	0.374659	2.50347	0.0130522	1009
DNAH14_ENST00000430092	0.191468	0.74504	0.0634921	0.256991	0.0852197	0.331606	0.23681	2.92218	0.0677966	1008
ZNF804B	0.195631	0.752731	0.0516385	0.259894	0.0686016	0.263959	0.24321	3.04418	0.0544503	1007
TRPM6	0.20854	0.740814	0.0506455	0.281501	0.0683646	0.242857	0.263488	2.85824	0.0533473	1007
ADAMTS16_ENST00000274181	0.245283	0.709037	0.0456802	0.345938	0.0644258	0.186235	0.325	2.43686	0.0478668	1007
COL6A6_ENST00000358511	0.231841	0.721393	0.0467662	0.321379	0.0648276	0.201717	0.301813	2.58929	0.0490605	1005
TNC	0.294527	0.672637	0.0328358	0.43787	0.0488166	0.111486	0.417489	2.05471	0.0339506	1005
CDH10	0.191235	0.755976	0.0527888	0.252964	0.0698287	0.276042	0.236453	3.09796	0.0557308	1004
FNDC1	0.261216	0.706879	0.0319043	0.369535	0.045134	0.122137	0.353576	2.41156	0.0329557	1003
LCT	0.275174	0.696909	0.0279163	0.39485	0.0400572	0.101449	0.379642	2.29934	0.0287179	1003
TRIOBP_ENST00000344404	0.248751	0.708292	0.042957	0.351199	0.0606488	0.172691	0.331117	2.42808	0.0448852	1001
NCKAP5	0.226773	0.738262	0.034965	0.307172	0.0473613	0.154185	0.293282	2.82061	0.0362319	1001
PTPRS_ENST00000372412	0.216783	0.755245	0.027972	0.287037	0.037037	0.129032	0.276786	3.08571	0.028777	1001
FREM1	0.288	0.67	0.042	0.429851	0.0626866	0.145833	0.404494	2.0303	0.0438413	1000
JAK1	0.305918	0.62989	0.0641926	0.485669	0.101911	0.209836	0.440751	1.7019	0.0685959	997
WDFY3	0.221888	0.723896	0.0542169	0.306519	0.074896	0.244344	0.285161	2.62182	0.0573248	996
HECW1_ENST00000395891	0.282129	0.675703	0.0421687	0.417533	0.0624071	0.149466	0.393007	2.08359	0.0440252	996
RIMS2_ENST00000436393	0.21206	0.712563	0.0753769	0.297602	0.105783	0.35545	0.269133	2.47902	0.0815217	995
ANKRD30A_ENST00000602533	0.224346	0.735412	0.0402414	0.305062	0.0547196	0.179372	0.289235	2.77947	0.0419287	994
ARID1B_ENST00000346085	0.177598	0.706357	0.116044	0.251429	0.164286	0.653409	0.215951	2.4055	0.131279	991
C20orf80	0.142281	0.833502	0.024218	0.170702	0.0290557	0.170213	0.165882	5.00606	0.024819	991
FRG1B	0.142424	0.833333	0.0242424	0.170909	0.0290909	0.170213	0.166078	5	0.0248447	990
TEX15	0.190091	0.752275	0.057634	0.252688	0.0766129	0.303191	0.234707	3.03673	0.0611588	989
SCN9A	0.229757	0.719636	0.0506073	0.319269	0.0703235	0.220264	0.298292	2.56679	0.0533049	988
LPHN3_ENST00000514591	0.248988	0.705466	0.0455466	0.352941	0.0645624	0.182927	0.331536	2.39519	0.04772	988
FLT4	0.258621	0.699797	0.0415822	0.369565	0.0594203	0.160784	0.348837	2.33108	0.0433862	986
SRRM2	0.262195	0.70122	0.0365854	0.373913	0.0521739	0.139535	0.355372	2.34694	0.0379747	984
RIMS2	0.211813	0.715886	0.0723014	0.295875	0.100996	0.341346	0.268734	2.51971	0.0779363	982
NTRK3	0.196538	0.774949	0.0285132	0.253614	0.0367937	0.145078	0.244613	3.44344	0.0293501	982
CACNA1A	0.305499	0.669043	0.0254582	0.456621	0.0380518	0.0833333	0.439883	2.02154	0.0261233	982
STAG2	0.0836735	0.582653	0.333673	0.143608	0.57268	3.9878	0.091314	1.39609	0.500766	980
MYO16	0.235955	0.731359	0.0326864	0.322626	0.0446927	0.138528	0.308824	2.72243	0.0337909	979
ANK1	0.294178	0.675179	0.0306435	0.435703	0.0453858	0.104167	0.416787	2.07862	0.0316122	979
RIMS2_ENST00000406091	0.214944	0.706244	0.0788127	0.304348	0.111594	0.366667	0.273794	2.40418	0.0855556	977
PABPC3	0.159836	0.785861	0.0543033	0.20339	0.0691004	0.339744	0.190244	3.66986	0.0574215	976
FAM5C	0.207605	0.73073	0.061665	0.284107	0.0843882	0.29703	0.261997	2.71374	0.0657174	973
PCDH10	0.284687	0.677287	0.0380267	0.420334	0.0561457	0.133574	0.397989	2.09873	0.0395299	973
TACC2	0.272354	0.705036	0.0226105	0.386297	0.03207	0.0830189	0.374294	2.39024	0.0231335	973
Q13209_HUMAN	0.186214	0.755144	0.058642	0.246594	0.0776567	0.314917	0.228824	3.08403	0.0622951	972
FAM123B_ENST00000330258	0.126674	0.656025	0.217302	0.193093	0.33124	1.71545	0.145047	1.90719	0.277632	971
MYH6	0.293814	0.671134	0.0350515	0.437788	0.0522273	0.119298	0.416058	2.04075	0.0363248	970
EPHB1	0.202689	0.766287	0.0310238	0.264507	0.0404858	0.153061	0.254215	3.27876	0.0320171	967
FLNB	0.315026	0.662176	0.0227979	0.475743	0.0344288	0.0723684	0.459909	1.96012	0.0233298	965
H3F3A	0.00932642	0.988601	0.00207254	0.00943396	0.00209644	0.222222	0.00941423	86.7273	0.00207684	965
CDKN2A_ENST00000446177	0.0622407	0.549793	0.387967	0.113208	0.70566	6.23333	0.0663717	1.2212	0.633898	964
FAM186A_ENST00000327337	0.217842	0.746888	0.0352697	0.291667	0.0472222	0.161905	0.278515	2.95082	0.0365591	964
ABCA4	0.281412	0.661475	0.0571132	0.425432	0.0863422	0.202952	0.391618	1.95399	0.0605727	963
SCN2A_ENST00000375437	0.246106	0.700935	0.0529595	0.351111	0.0755556	0.21519	0.326446	2.34375	0.0559211	963
ACACB	0.282451	0.68432	0.0332295	0.412747	0.0485584	0.117647	0.393632	2.16776	0.0343716	963
FER1L6	0.257024	0.703434	0.0395421	0.365385	0.056213	0.153846	0.345938	2.37193	0.0411701	961
SPTB	0.287201	0.674298	0.0385016	0.425926	0.0570988	0.134058	0.40292	2.07029	0.0400433	961
PCDHA4_ENST00000530339	0.325702	0.652445	0.0218522	0.499203	0.0334928	0.0670927	0.483025	1.87725	0.0223404	961
CACNA1H_ENST00000348261	0.303125	0.660417	0.0364583	0.458991	0.055205	0.120275	0.434978	1.94479	0.0378378	960
CUX2	0.372917	0.604167	0.0229167	0.617241	0.037931	0.0614525	0.594684	1.52632	0.0234542	960
CHD6	0.234619	0.718457	0.0469239	0.32656	0.065312	0.2	0.30654	2.55185	0.0492341	959
USP6_ENST00000250066	0.153445	0.807933	0.0386221	0.189922	0.0478036	0.251701	0.181258	4.20652	0.0401737	958
VPS13C	0.177638	0.751306	0.0710554	0.236439	0.0945758	0.4	0.21601	3.02101	0.0764904	957
FLT1	0.166492	0.780105	0.0534031	0.213423	0.0684564	0.320755	0.199749	3.54762	0.0564159	955
CTNNA2_ENST00000466387	0.259182	0.703043	0.0377754	0.368657	0.0537313	0.145749	0.349858	2.36749	0.0392585	953
CACNA1A_ENST00000360228	0.305352	0.669465	0.0251836	0.456113	0.0376176	0.0824742	0.439577	2.0254	0.0258342	953
TRANK1_ENST00000429976	0.258947	0.696842	0.0442105	0.371601	0.0634441	0.170732	0.349432	2.29861	0.0462555	950
CACNA1A_ENST00000325084	0.318947	0.651579	0.0294737	0.489499	0.0452342	0.0924092	0.468315	1.87009	0.0303688	950
EPHB1_ENST00000398015	0.203158	0.767368	0.0294737	0.264746	0.0384088	0.145078	0.254954	3.29864	0.0303688	950
NBEA_ENST00000400445	0.18019	0.754478	0.0653319	0.238827	0.0865922	0.362573	0.219794	3.07296	0.0698985	949
TSC2_ENST00000219476	0.200422	0.722574	0.0770042	0.277372	0.106569	0.384211	0.25066	2.60456	0.0834286	948
ERBB3_ENST00000267101	0.105597	0.866948	0.0274551	0.121803	0.0316687	0.26	0.118064	6.51587	0.0282302	947
FOXL2	0.031679	0.966209	0.00211193	0.0327869	0.00218579	0.0666667	0.0327154	28.5938	0.0021164	947
SLIT2	0.224101	0.727273	0.0486258	0.30814	0.0668605	0.216981	0.288828	2.66667	0.0511111	946
SCN2A	0.238095	0.708995	0.0529101	0.335821	0.0746269	0.222222	0.3125	2.43636	0.0558659	945
JAK3	0.137566	0.824339	0.0380952	0.166881	0.0462131	0.276923	0.159509	4.69277	0.039604	945
KEAP1	0.110286	0.813362	0.0763521	0.135593	0.0938722	0.692308	0.123957	4.35795	0.0826636	943
SCN3A	0.239915	0.695329	0.0647558	0.345038	0.0931298	0.269912	0.315642	2.28223	0.0692395	942
CDH1	0.100956	0.657811	0.241233	0.153473	0.366721	2.38947	0.112293	1.92236	0.317927	941
PRIC285	0.32766	0.65	0.0223404	0.504092	0.0343699	0.0681818	0.487342	1.85714	0.0228509	940
GNAS_ENST00000371100	0.16951	0.80597	0.0245203	0.210317	0.0304233	0.144654	0.204108	4.15385	0.0251366	938
ANK1_ENST00000265709	0.291355	0.671291	0.0373533	0.434022	0.0556439	0.128205	0.411145	2.04221	0.0388027	937
SPTBN5	0.237179	0.713675	0.0491453	0.332335	0.0688623	0.207207	0.310924	2.49254	0.0516854	936
NCOR2_ENST00000405201	0.340107	0.617112	0.0427807	0.551127	0.0693241	0.125786	0.515397	1.61173	0.0446927	935
ASTN1_ENST00000367654	0.273019	0.684154	0.0428266	0.399061	0.0625978	0.156863	0.375552	2.1661	0.0447427	934
COL4A1	0.244111	0.730193	0.0256959	0.334311	0.0351906	0.105263	0.322946	2.70635	0.0263736	934
FN1_ENST00000354785	0.26073	0.687768	0.0515021	0.379095	0.074883	0.197531	0.352685	2.20275	0.0542986	932
PLIN4	0.363734	0.627682	0.00858369	0.579487	0.0136752	0.0235988	0.571669	1.68588	0.00865801	932
PLIN4_ENST00000301286	0.366953	0.624464	0.00858369	0.587629	0.0137457	0.0233918	0.579661	1.66286	0.00865801	932
ROBO2_ENST00000487694	0.201933	0.722879	0.075188	0.279346	0.104012	0.37234	0.253028	2.60853	0.0813008	931
NLRP5_ENST00000390649	0.313641	0.647691	0.0386681	0.484245	0.0597015	0.123288	0.456964	1.83841	0.0402235	931
ADAMTS18	0.244086	0.705376	0.0505376	0.346037	0.0716463	0.207048	0.322902	2.39416	0.0532276	930
ZDBF2	0.195043	0.741379	0.0635776	0.263081	0.0857558	0.325967	0.242303	2.86667	0.0678941	928
CELSR2	0.275081	0.702265	0.0226537	0.391705	0.0322581	0.0823529	0.379464	2.3587	0.0231788	927
BCORL1	0.187027	0.71027	0.102703	0.263318	0.144597	0.549133	0.230053	2.45149	0.114458	925
NOS1	0.263784	0.697297	0.0389189	0.378295	0.055814	0.147541	0.358297	2.30357	0.0404949	925
CDH9	0.209957	0.737013	0.0530303	0.284875	0.071953	0.252577	0.265753	2.80247	0.056	924
CACNA1S	0.332251	0.640693	0.0270563	0.518581	0.0422297	0.0814332	0.497569	1.78313	0.0278087	924
PCDHA3_ENST00000522353	0.327922	0.651515	0.0205628	0.503322	0.0315615	0.0627063	0.487923	1.86957	0.0209945	924
Q6YL47_HUMAN	0.312026	0.64247	0.0455038	0.485666	0.0708263	0.145833	0.453543	1.79697	0.0476731	923
TLN2	0.284165	0.675705	0.0401302	0.420546	0.05939	0.141221	0.39697	2.08361	0.0418079	922
FLNA_ENST00000369850	0.306941	0.661605	0.0314534	0.463934	0.047541	0.102473	0.442879	1.95513	0.0324748	922
HIVEP3	0.277657	0.693059	0.0292842	0.400626	0.0422535	0.105469	0.384384	2.25795	0.0301676	922
TRPM6_ENST00000451710	0.214984	0.737242	0.0477742	0.291605	0.0648012	0.222222	0.273859	2.80579	0.050171	921
FN1	0.252174	0.692391	0.0554348	0.364207	0.0800628	0.219828	0.337209	2.25088	0.0586881	920
HCN1	0.255713	0.682263	0.0620239	0.374801	0.0909091	0.242553	0.343567	2.14726	0.0661253	919
MYH11_ENST00000396324	0.330794	0.632209	0.0369967	0.523236	0.0585198	0.111842	0.494309	1.71893	0.0384181	919
ZDBF2_ENST00000374423	0.194989	0.744009	0.0610022	0.262079	0.0819912	0.312849	0.242219	2.90638	0.0649652	918
NTRK3_ENST00000360948	0.208061	0.763617	0.0283224	0.272468	0.0370899	0.136126	0.262724	3.23041	0.029148	918
FLNB_ENST00000490882	0.331155	0.647059	0.0217865	0.511785	0.03367	0.0657895	0.495114	1.83333	0.0222717	918
THSD7A	0.227917	0.708833	0.0632497	0.321538	0.0892308	0.277512	0.295198	2.43446	0.0675204	917
ZNF469	0.219193	0.761178	0.0196292	0.287966	0.025788	0.0895522	0.280726	3.18721	0.0200222	917
CDKN2A_ENST00000498124	0.0633188	0.55786	0.378821	0.113503	0.679061	5.98276	0.0675991	1.26173	0.609842	916
SPAG17	0.207424	0.748908	0.0436681	0.276968	0.058309	0.210526	0.261708	2.98261	0.0456621	916
ZNF99	0.214442	0.748359	0.0371991	0.28655	0.0497076	0.173469	0.272981	2.97391	0.0386364	914
CENPF	0.208105	0.706462	0.0854326	0.294574	0.12093	0.410526	0.262794	2.40672	0.0934132	913
NAV2	0.288061	0.685652	0.026287	0.420128	0.0383387	0.0912548	0.404615	2.18118	0.0269966	913
MLL4	0.220395	0.686404	0.0932018	0.321086	0.135783	0.422886	0.2827	2.18881	0.102781	912
PTCH1_ENST00000430669	0.210757	0.699232	0.090011	0.301413	0.128728	0.427083	0.267038	2.32482	0.0989144	911
CRB1	0.23956	0.714286	0.0461538	0.335385	0.0646154	0.192661	0.315029	2.5	0.0483871	910
ADAMTS16	0.24366	0.713341	0.0429989	0.341577	0.0602782	0.176471	0.322157	2.48846	0.0449309	907
MYH11	0.328556	0.635061	0.0363837	0.517361	0.0572917	0.110738	0.489327	1.74018	0.0377574	907
PARP4	0.194046	0.785006	0.0209482	0.247191	0.0266854	0.107955	0.240766	3.65128	0.0213964	907
RIMS1	0.187845	0.750276	0.0618785	0.250368	0.0824742	0.329412	0.231293	3.00442	0.06596	905
SDK2	0.312707	0.646409	0.040884	0.483761	0.0632479	0.130742	0.454984	1.82812	0.0426267	905
MEGF8	0.292818	0.677348	0.0298343	0.4323	0.0440457	0.101887	0.414062	2.09932	0.0307517	905
AKAP6	0.203765	0.730897	0.0653378	0.278788	0.0893939	0.320652	0.255911	2.71605	0.0699052	903
PIK3C2G	0.13289	0.810631	0.0564784	0.163934	0.0696721	0.425	0.153257	4.2807	0.0598592	903
PCDHA12	0.322259	0.658915	0.0188261	0.489076	0.0285714	0.0584192	0.47549	1.93182	0.0191874	903
PCDHA13	0.354051	0.624861	0.0210877	0.566607	0.0337478	0.0595611	0.54811	1.66568	0.021542	901
OTOF	0.274444	0.688889	0.0366667	0.398387	0.0532258	0.133603	0.378254	2.21429	0.0380623	900
PCDHA8_ENST00000531613	0.3	0.675556	0.0244444	0.444079	0.0361842	0.0814815	0.428571	2.08219	0.0250569	900
TSHZ3_ENST00000240587	0.311457	0.661846	0.0266963	0.470588	0.0403361	0.0857143	0.452342	1.95724	0.0274286	899
DMXL2	0.167038	0.780624	0.0523385	0.21398	0.0670471	0.313333	0.200535	3.55838	0.0552291	898
ITPR1	0.238307	0.718263	0.0434298	0.331783	0.0604651	0.182243	0.312865	2.54941	0.0454016	898
ROBO2	0.191964	0.742188	0.0658482	0.258647	0.0887218	0.343023	0.237569	2.87879	0.0704898	896
MED12L	0.235491	0.708705	0.0558036	0.332283	0.0787402	0.236967	0.308029	2.43295	0.0591017	896
SORCS3	0.248884	0.702009	0.0491071	0.354531	0.0699523	0.197309	0.331352	2.35581	0.0516432	896
CPAMD8	0.294643	0.670759	0.0345982	0.439268	0.0515807	0.117424	0.417722	2.03729	0.0358382	896
PAPPA	0.27486	0.687151	0.0379888	0.4	0.0552846	0.138211	0.379045	2.19643	0.039489	895
PTPRB	0.266219	0.675615	0.0581655	0.39404	0.0860927	0.218487	0.362805	2.08276	0.0617577	894
COL4A4	0.211646	0.758119	0.0302352	0.279173	0.0398818	0.142857	0.268466	3.13426	0.0311778	893
LPHN3	0.259259	0.69248	0.0482604	0.374392	0.0696921	0.186147	0.35	2.25182	0.0507075	891
COL1A2	0.216611	0.754209	0.0291807	0.287202	0.0386905	0.134715	0.276504	3.06849	0.0300578	891
PIK3C2G_ENST00000433979	0.12809	0.81236	0.0595506	0.157676	0.0733057	0.464912	0.146907	4.32934	0.0633214	890
RIMS2_ENST00000507740	0.214848	0.712036	0.0731159	0.301738	0.102686	0.340314	0.273639	2.47266	0.0788835	889
LPHN3_ENST00000512091	0.257593	0.695163	0.0472441	0.37055	0.0679612	0.183406	0.34697	2.28044	0.0495868	889
KIF26B	0.289089	0.688414	0.0224972	0.419935	0.0326797	0.077821	0.406646	2.20939	0.023015	889
EPHA7_ENST00000369303	0.170045	0.777027	0.0529279	0.218841	0.0681159	0.311258	0.204885	3.48485	0.0558859	888
PTPRZ1_ENST00000393386	0.211712	0.740991	0.0472973	0.285714	0.0638298	0.223404	0.268571	2.86087	0.0496454	888
PAK7	0.203829	0.756757	0.0394144	0.269345	0.0520833	0.19337	0.256011	3.11111	0.0410317	888
GLI1	0.224099	0.737613	0.0382883	0.303817	0.0519084	0.170854	0.288824	2.81116	0.0398126	888
F8	0.209932	0.731377	0.0586907	0.287037	0.0802469	0.27957	0.265714	2.72269	0.0623501	886
SCN9A_ENST00000375387	0.235892	0.717833	0.0462754	0.328616	0.0644654	0.196172	0.308715	2.544	0.0485207	886
KIAA1549_ENST00000422774	0.292325	0.677201	0.030474	0.431667	0.045	0.104247	0.413078	2.0979	0.0314319	886
TNN	0.25395	0.722348	0.023702	0.351562	0.0328125	0.0933333	0.340393	2.60163	0.0242775	886
VPS13C_ENST00000395896	0.175141	0.755932	0.0689266	0.231689	0.0911809	0.393548	0.212329	3.09722	0.0740291	885
CACNA1D	0.272624	0.683258	0.0441176	0.399007	0.0645695	0.161826	0.374806	2.15714	0.0461538	884
PCDHB7	0.347285	0.624434	0.0282805	0.556159	0.0452899	0.0814332	0.532062	1.66265	0.0291036	884
NLRP3	0.308041	0.642129	0.0498301	0.479718	0.0776014	0.161765	0.445172	1.7943	0.0524434	883
CHD5_ENST00000262450	0.337486	0.634202	0.0283126	0.532143	0.0446429	0.0838926	0.509402	1.73375	0.0291375	883
F8_ENST00000360256	0.209751	0.732426	0.0578231	0.286378	0.0789474	0.275676	0.265423	2.73729	0.0613718	882
PCDHA6_ENST00000529310	0.315551	0.668558	0.015891	0.471986	0.0237691	0.0503597	0.461028	2.01712	0.0161476	881
KIAA1549_ENST00000242365	0.294318	0.675	0.0306818	0.436027	0.0454545	0.104247	0.417069	2.07692	0.031653	880
LRRIQ1_ENST00000393217	0.172924	0.736064	0.0910125	0.23493	0.123648	0.526316	0.209078	2.78879	0.100125	879
GOLGB1	0.170648	0.744027	0.0853242	0.229358	0.114679	0.5	0.205761	2.90667	0.0932836	879
GREB1_ENST00000381486	0.29124	0.673493	0.0352673	0.432432	0.0523649	0.121094	0.410915	2.06272	0.0365566	879
FLNA	0.313993	0.654152	0.0318544	0.48	0.0486957	0.101449	0.457711	1.89145	0.0329025	879
ADAMTSL3	0.22779	0.694761	0.0774487	0.327869	0.111475	0.34	0.294985	2.27612	0.0839506	878
ZNF521	0.238041	0.708428	0.0535308	0.336013	0.0755627	0.22488	0.312407	2.42969	0.0565584	878
FAM47C	0.246014	0.723235	0.0307517	0.340157	0.0425197	0.125	0.326284	2.61317	0.0317274	878
MSH6	0.147092	0.720639	0.132269	0.204114	0.183544	0.899225	0.17246	2.57959	0.152431	877
MYCBP2	0.202965	0.733181	0.063854	0.276827	0.0870918	0.314607	0.254649	2.74786	0.0682095	877
CNTN5	0.176739	0.761688	0.0615735	0.232036	0.0808383	0.348387	0.214681	3.19617	0.0656136	877
COL3A1	0.18016	0.769669	0.050171	0.234074	0.0651852	0.278481	0.21975	3.34158	0.0528211	877
PTCH1_ENST00000375274	0.210046	0.700913	0.0890411	0.299674	0.127036	0.423913	0.265896	2.34351	0.0977444	876
PTCH1_ENST00000331920	0.203429	0.702857	0.0937143	0.289431	0.133333	0.460674	0.25538	2.36538	0.103405	875
CSPG4	0.283429	0.685714	0.0308571	0.413333	0.045	0.108871	0.395534	2.18182	0.0318396	875
COL14A1	0.20595	0.740275	0.0537757	0.278207	0.072643	0.261111	0.259366	2.85022	0.0568319	874
TRANK1	0.263459	0.695304	0.0412371	0.378913	0.0593081	0.156522	0.357698	2.28195	0.0430108	873
PCDHA1_ENST00000504120	0.296211	0.676234	0.0275545	0.438031	0.040747	0.0930233	0.420881	2.08865	0.0283353	871
DLC1	0.250863	0.708861	0.0402762	0.353896	0.0568182	0.16055	0.334869	2.43478	0.0419664	869
KIF26B_ENST00000407071	0.287687	0.690449	0.0218642	0.416667	0.0316667	0.076	0.403877	2.23048	0.0223529	869
PTPRZ1	0.214286	0.739631	0.0460829	0.28972	0.0623053	0.215054	0.272727	2.84071	0.0483092	868
ZNF462	0.252304	0.701613	0.0460829	0.359606	0.0656814	0.182648	0.337442	2.35135	0.0483092	868
TNRC18_ENST00000399537	0.279954	0.686636	0.0334101	0.407718	0.0486577	0.119342	0.3888	2.19118	0.034565	868
KDM6A_ENST00000377967	0.184544	0.592849	0.222607	0.311284	0.375486	1.20625	0.226308	1.45609	0.28635	867
GRM3	0.283737	0.678201	0.0380623	0.418367	0.0561224	0.134146	0.396135	2.10753	0.0395683	867
DNHD1	0.222864	0.734411	0.0427252	0.303459	0.0581761	0.19171	0.286776	2.76522	0.0446321	866
PXDN	0.299076	0.67321	0.0277136	0.444254	0.0411664	0.0926641	0.426689	2.06007	0.0285036	866
PCDHA4	0.337182	0.645497	0.017321	0.522361	0.0268336	0.0513699	0.508711	1.82085	0.0176263	866
ALPK2_ENST00000361673	0.215278	0.740741	0.0439815	0.290625	0.059375	0.204301	0.274336	2.85714	0.0460048	864
SHANK1	0.28588	0.690972	0.0231481	0.413735	0.0335008	0.0809717	0.400324	2.23596	0.0236967	864
TRPS1	0.260718	0.681344	0.0579374	0.382653	0.085034	0.222222	0.352665	2.13818	0.0615006	863
TRPM6_ENST00000449912	0.220162	0.730012	0.0498262	0.301587	0.068254	0.226316	0.282318	2.70386	0.052439	863
PRG4	0.318656	0.668598	0.0127462	0.476603	0.0190641	0.04	0.467687	2.01748	0.0129108	863
KDM6A_ENST00000382899	0.190255	0.587007	0.222738	0.324111	0.379447	1.17073	0.234957	1.42135	0.286567	862
PCDHA2_ENST00000526136	0.263647	0.706156	0.0301974	0.373355	0.0427632	0.114537	0.358044	2.40316	0.0311377	861
RB1_ENST00000267163	0.0605355	0.433062	0.506403	0.139785	1.16935	8.36538	0.0644362	0.76386	1.02594	859
TRPM3_ENST00000423814	0.25641	0.695804	0.0477855	0.368509	0.0686767	0.186364	0.344828	2.28736	0.0501836	858
TEP1	0.25641	0.708625	0.034965	0.361842	0.0493421	0.136364	0.344828	2.432	0.0362319	858
ITPR3	0.298368	0.679487	0.0221445	0.439108	0.0325901	0.0742188	0.425249	2.12	0.022646	858
PTPRB_ENST00000261266	0.267211	0.682614	0.050175	0.391453	0.0735043	0.187773	0.36465	2.15074	0.0528256	857
CDH8	0.254376	0.703617	0.042007	0.361526	0.0597015	0.165138	0.341158	2.37402	0.043849	857
MEGF8_ENST00000334370	0.283547	0.684947	0.0315053	0.413969	0.0459966	0.111111	0.395765	2.17407	0.0325301	857
FRG1	0.0770128	0.897316	0.0256709	0.0858257	0.0286086	0.333333	0.0834387	8.73864	0.0263473	857
SCN4A	0.309218	0.672112	0.0186698	0.460069	0.0277778	0.0603774	0.447635	2.04982	0.019025	857
ASH1L	0.184579	0.753505	0.0619159	0.244961	0.0821705	0.335443	0.226361	3.05687	0.0660025	856
SVIL	0.28655	0.661988	0.051462	0.432862	0.0777385	0.179592	0.401639	1.95848	0.054254	855
ITPR1_ENST00000302640	0.245614	0.711111	0.0432749	0.345395	0.0608553	0.17619	0.325581	2.46154	0.0452323	855
Q8N8K0_HUMAN	0.259649	0.698246	0.0421053	0.371859	0.0603015	0.162162	0.350711	2.31395	0.043956	855
SPEF2_ENST00000356031	0.169789	0.754098	0.0761124	0.225155	0.100932	0.448276	0.204513	3.06667	0.0823828	854
ROBO1_ENST00000464233	0.196952	0.728019	0.0750293	0.270531	0.10306	0.380952	0.245255	2.67672	0.0811153	853
FAM75D4	0.227433	0.726846	0.045721	0.312903	0.0629032	0.201031	0.294385	2.66094	0.0479115	853
MAP2	0.212691	0.715629	0.0716804	0.297209	0.100164	0.337017	0.270149	2.51653	0.0772152	851
CD163L1	0.251765	0.682353	0.0658824	0.368966	0.0965517	0.261682	0.336478	2.14815	0.070529	850
ABCA12_ENST00000389661	0.228235	0.724706	0.0470588	0.314935	0.0649351	0.206186	0.295732	2.63248	0.0493827	850
HTT	0.261176	0.697647	0.0411765	0.374368	0.0590219	0.157658	0.353503	2.30739	0.0429448	850
SORL1	0.272085	0.684335	0.0435807	0.39759	0.0636833	0.160173	0.373786	2.16791	0.0455665	849
TNRC18_ENST00000430969	0.273585	0.694575	0.0318396	0.393888	0.0458404	0.116379	0.376623	2.27413	0.0328867	848
FASN	0.323113	0.650943	0.0259434	0.496377	0.0398551	0.080292	0.477352	1.86486	0.0266344	848
AMER1	0.109799	0.63046	0.25974	0.174157	0.411985	2.36559	0.123342	1.70607	0.350877	847
PPP1R3A	0.180638	0.754427	0.0649351	0.239437	0.086072	0.359477	0.220461	3.07212	0.0694444	847
SCN3A_ENST00000409101	0.230224	0.708383	0.0613932	0.325	0.0866667	0.266667	0.29908	2.42915	0.0654088	847
WDR87	0.192444	0.757969	0.0495868	0.253894	0.0654206	0.257669	0.238304	3.13171	0.0521739	847
SLIT3	0.309693	0.656028	0.034279	0.472072	0.0522523	0.110687	0.44863	1.90722	0.0354957	846
ITPR1_ENST00000357086	0.238152	0.716825	0.0450237	0.332231	0.0628099	0.189055	0.312597	2.53138	0.0471464	844
BRCA1_ENST00000471181	0.13879	0.797153	0.0640569	0.174107	0.0803571	0.461538	0.161157	3.92982	0.0684411	843
MTUS2_ENST00000431530	0.260973	0.708185	0.0308422	0.368509	0.0435511	0.118182	0.35313	2.42683	0.0318237	843
LOC442444	0.247924	0.72242	0.029656	0.343186	0.0410509	0.119617	0.329653	2.60256	0.0305623	843
UBR5	0.2019	0.714964	0.0831354	0.282392	0.116279	0.411765	0.252976	2.50833	0.0906736	842
MYOM2	0.271106	0.681332	0.0475624	0.397906	0.069808	0.175439	0.371941	2.13806	0.0499376	841
CDH18_ENST00000507958	0.216925	0.742551	0.0405244	0.292135	0.0545746	0.186813	0.277017	2.88426	0.042236	839
MYT1L	0.294398	0.671037	0.034565	0.438721	0.0515098	0.117409	0.41723	2.03986	0.0358025	839
MYO7B	0.312649	0.650358	0.0369928	0.480734	0.0568807	0.118321	0.454861	1.86007	0.0384139	838
FAM75D1	0.224612	0.728793	0.046595	0.308197	0.0639344	0.207447	0.289676	2.68722	0.0488722	837
SPTB_ENST00000542895	0.293907	0.667861	0.0382318	0.440072	0.0572451	0.130081	0.416244	2.01079	0.0397516	837
RIMS2_ENST00000402998	0.199761	0.714115	0.0861244	0.279732	0.120603	0.431138	0.249626	2.49791	0.0942408	836
ROBO1_ENST00000305299	0.197368	0.727273	0.0753589	0.271382	0.103618	0.381818	0.245902	2.66667	0.0815006	836
KIF2B	0.227273	0.736842	0.0358852	0.308442	0.0487013	0.157895	0.294118	2.8	0.0372208	836
CACNA1G_ENST00000359106	0.295808	0.664671	0.039521	0.445045	0.0594595	0.133603	0.420068	1.98214	0.0411471	835
TRPS1_ENST00000395715	0.261391	0.681055	0.057554	0.383803	0.084507	0.220183	0.353896	2.13534	0.0610687	834
ABCA7	0.308153	0.658273	0.0335731	0.468124	0.0510018	0.108949	0.445407	1.92632	0.0347395	834
PCDHA3	0.33693	0.646283	0.0167866	0.521336	0.025974	0.0498221	0.508137	1.82712	0.0170732	834
NBAS	0.219688	0.722689	0.057623	0.303987	0.0797342	0.262295	0.281538	2.60606	0.0611465	833
DOCK3_ENST00000266037	0.238896	0.713085	0.0480192	0.335017	0.0673401	0.201005	0.31388	2.48536	0.0504414	833
CNTN5_ENST00000524871	0.174279	0.764423	0.0612981	0.227987	0.0801887	0.351724	0.211063	3.2449	0.0653009	832
CHD7	0.235577	0.707933	0.0564904	0.332767	0.0797963	0.239796	0.308176	2.42387	0.0598726	832
POLQ	0.203369	0.723225	0.0734055	0.281198	0.101498	0.360947	0.255287	2.61304	0.0792208	831
TTC40	0.258724	0.700361	0.0409146	0.369416	0.0584192	0.15814	0.349026	2.33735	0.04266	831
USH2A_ENST00000366942	0.186747	0.755422	0.0578313	0.247209	0.076555	0.309677	0.22963	3.08867	0.0613811	830
DOT1L	0.225301	0.745783	0.0289157	0.3021	0.0387722	0.128342	0.290824	2.93365	0.0297767	830
EVPL	0.304716	0.659008	0.0362757	0.462385	0.0550459	0.119048	0.438261	1.93262	0.0376412	827
TRPM3_ENST00000377110	0.248184	0.700969	0.0508475	0.354059	0.0725389	0.204878	0.330113	2.34413	0.0535714	826
SCN7A_ENST00000409855	0.185455	0.744242	0.070303	0.249186	0.0944625	0.379085	0.227679	2.90995	0.0756193	825
CACNA1G_ENST00000354983	0.295758	0.666667	0.0375758	0.443636	0.0563636	0.127049	0.419966	2	0.0390428	825
PLCE1_ENST00000260766	0.214806	0.71966	0.065534	0.298482	0.0910624	0.305085	0.27357	2.5671	0.0701299	824
FAM47A	0.265777	0.695388	0.038835	0.382199	0.0558464	0.146119	0.361983	2.28287	0.040404	824
PCNXL2	0.2661	0.687728	0.0461725	0.386926	0.0671378	0.173516	0.362583	2.20233	0.0484076	823
STAB1	0.287971	0.681652	0.0303767	0.42246	0.0445633	0.105485	0.404437	2.14122	0.0313283	823
CBL	0.0863747	0.855231	0.0583942	0.100996	0.0682788	0.676056	0.0945406	5.90756	0.0620155	822
ANKRD30B_ENST00000358984	0.173966	0.778589	0.0474453	0.223438	0.0609375	0.272727	0.210604	3.51648	0.0498084	822
CNTNAP4_ENST00000307431	0.236297	0.711328	0.0523752	0.332192	0.0736301	0.221649	0.30941	2.46414	0.0552699	821
CDH18	0.221681	0.736906	0.0414129	0.300826	0.0561983	0.186813	0.28482	2.80093	0.043202	821
GCN1L1	0.301587	0.659341	0.039072	0.457407	0.0592593	0.129555	0.431818	1.93548	0.0406607	819
SPTBN4	0.247863	0.717949	0.034188	0.345238	0.047619	0.137931	0.329545	2.54545	0.0353982	819
SALL3	0.330891	0.655678	0.013431	0.504655	0.0204842	0.0405904	0.494526	1.90426	0.0136139	819
BAP1	0.0684597	0.672372	0.259169	0.101818	0.385455	3.78571	0.0734908	2.05224	0.349835	818
TIAM1	0.282742	0.673195	0.0440636	0.42	0.0654545	0.155844	0.394198	2.05993	0.0460948	817
TACC2_ENST00000453444	0.282742	0.695226	0.0220318	0.40669	0.0316901	0.0779221	0.394198	2.28112	0.0225282	817
HIVEP1	0.219632	0.727607	0.0527607	0.301855	0.0725126	0.240223	0.281447	2.67117	0.0556995	815
GPR158	0.219632	0.731288	0.0490798	0.300336	0.0671141	0.223464	0.281447	2.72146	0.0516129	815
PCDHG_cluster	0.287117	0.684663	0.0282209	0.419355	0.0412186	0.0982906	0.402754	2.17121	0.0290404	815
BOC	0.528834	0.455215	0.0159509	1.16173	0.0350404	0.0301624	1.1224	0.835586	0.0162095	815
CNTN6	0.201474	0.697789	0.100737	0.288732	0.144366	0.5	0.252308	2.30894	0.112022	814
MYH15	0.22113	0.722359	0.0565111	0.306122	0.0782313	0.255556	0.283912	2.60177	0.0598958	814
ABCC9	0.224816	0.723587	0.0515971	0.310696	0.0713073	0.229508	0.290016	2.61778	0.0544041	814
RIMBP2	0.306273	0.659287	0.0344403	0.464552	0.0522388	0.11245	0.441489	1.93502	0.0356688	813
NRXN3	0.248462	0.726937	0.0246002	0.341794	0.0338409	0.0990099	0.330606	2.66216	0.0252207	813
MAP1B	0.252463	0.689655	0.0578818	0.366071	0.0839286	0.229268	0.337727	2.22222	0.0614379	812
MDC1_ENST00000376406	0.181258	0.764488	0.054254	0.237097	0.0709677	0.29932	0.221386	3.24607	0.0573664	811
GRM1	0.294698	0.659679	0.0456227	0.446729	0.0691589	0.154812	0.417832	1.93841	0.0478036	811
CROCC	0.212084	0.74476	0.0431566	0.284768	0.057947	0.203488	0.269171	2.91787	0.0451031	811
ITPR3_ENST00000374316	0.293465	0.683107	0.0234279	0.429603	0.034296	0.0798319	0.415358	2.15564	0.0239899	811
SPTBN2	0.261728	0.697531	0.0407407	0.375221	0.0584071	0.15566	0.354515	2.30612	0.042471	810
MYO7B_ENST00000428314	0.314815	0.648148	0.037037	0.485714	0.0571429	0.117647	0.459459	1.84211	0.0384615	810
HLA-C_ENST00000383329	0.133498	0.855377	0.0111248	0.156069	0.0130058	0.0833333	0.154066	5.91453	0.01125	809
COL5A3	0.210396	0.756188	0.0334158	0.278232	0.0441899	0.158824	0.266458	3.10152	0.0345711	808
NLRP4_ENST00000301295	0.304833	0.644362	0.0508055	0.473077	0.0788462	0.166667	0.438503	1.81185	0.0535248	807
SDK2_ENST00000392650	0.318463	0.636927	0.0446097	0.5	0.0700389	0.140078	0.467273	1.75427	0.0466926	807
TIAM1_ENST00000286827	0.283767	0.671623	0.0446097	0.422509	0.0664207	0.157205	0.396194	2.04528	0.0466926	807
GRM8	0.239157	0.726146	0.0346964	0.329352	0.0477816	0.145078	0.314332	2.65158	0.0359435	807
WT1	0.16791	0.616915	0.215174	0.272177	0.34879	1.28148	0.201794	1.61039	0.274168	804
ZFPM2	0.215174	0.747512	0.0373134	0.287854	0.0499168	0.17341	0.274168	2.96059	0.0387597	804
ROBO1	0.198007	0.724782	0.0772105	0.273196	0.106529	0.389937	0.246894	2.63348	0.0836707	803
TPO	0.283935	0.687422	0.0286426	0.413043	0.0416667	0.100877	0.396522	2.1992	0.0294872	803
WDR87_ENST00000447313	0.19975	0.749064	0.051186	0.266667	0.0683333	0.25625	0.24961	2.98507	0.0539474	801
TRPM3	0.24125	0.7125	0.04625	0.338596	0.0649123	0.19171	0.317957	2.47826	0.0484928	800
CACNA1G	0.29625	0.66375	0.04	0.446328	0.0602637	0.135021	0.420959	1.97398	0.0416667	800
HLA-C_ENST00000539307	0.13	0.8575	0.0125	0.151603	0.0145773	0.0961538	0.149425	6.01754	0.0126582	800
MYH9	0.296992	0.636591	0.066416	0.466535	0.104331	0.223629	0.42246	1.75172	0.0711409	798
PCDH9	0.235589	0.726817	0.037594	0.324138	0.0517241	0.159574	0.308197	2.66055	0.0390625	798
CACNA1I	0.26817	0.718045	0.0137845	0.373473	0.0191972	0.0514019	0.366438	2.54667	0.0139771	798
SORCS1	0.249686	0.696361	0.0539523	0.358559	0.0774775	0.21608	0.332776	2.29339	0.0570292	797
PCDHA8	0.301129	0.677541	0.02133	0.444444	0.0314815	0.0708333	0.43088	2.10117	0.0217949	797
AFF2	0.224874	0.736181	0.0389447	0.305461	0.052901	0.173184	0.290113	2.79048	0.0405229	796
CHD4_ENST00000309577	0.202516	0.753459	0.0440252	0.268781	0.0584307	0.217391	0.253943	3.05612	0.0460526	795
HLA-C	0.130982	0.858942	0.0100756	0.152493	0.0117302	0.0769231	0.150725	6.08929	0.0101781	794
VPS13A	0.171501	0.769231	0.0592686	0.222951	0.0770492	0.345588	0.207002	3.33333	0.0630027	793
MYLK	0.269861	0.689786	0.0403531	0.391225	0.0585009	0.149533	0.369603	2.22358	0.0420499	793
NIPBL	0.184343	0.724747	0.0909091	0.254355	0.125436	0.493151	0.226006	2.63303	0.1	792
MYO5B	0.319444	0.645202	0.0353535	0.495108	0.0547945	0.110672	0.469388	1.81851	0.0366492	792
PCDH11X	0.209861	0.742099	0.0480405	0.282794	0.0647359	0.228916	0.2656	2.87745	0.0504648	791
OTOGL_ENST00000458043	0.193916	0.741445	0.0646388	0.261538	0.0871795	0.333333	0.240566	2.86765	0.0691057	789
MAGI2	0.268695	0.685678	0.0456274	0.391867	0.0665434	0.169811	0.367418	2.18145	0.0478088	789
PCDHA1	0.299492	0.675127	0.0253807	0.443609	0.037594	0.0847458	0.427536	2.07812	0.0260417	788
PCDHA5_ENST00000529859	0.312183	0.664975	0.0228426	0.469466	0.0343511	0.0731707	0.453875	1.98485	0.0233766	788
ZNF423_ENST00000262383	0.335025	0.64467	0.0203046	0.519685	0.0314961	0.0606061	0.503817	1.81429	0.0207254	788
COL4A5	0.21474	0.74587	0.0393901	0.287905	0.0528109	0.183432	0.273463	2.935	0.0410053	787
SCN7A	0.185751	0.744275	0.0699746	0.249573	0.0940171	0.376712	0.228125	2.91045	0.0752394	786
ZNF423	0.339695	0.639949	0.0203562	0.530815	0.0318091	0.0599251	0.514451	1.77739	0.0207792	786
STAG2_ENST00000218089	0.0904459	0.648408	0.261146	0.139489	0.40275	2.88732	0.0994398	1.8442	0.353448	785
ROBO1_ENST00000495273	0.197452	0.721019	0.0815287	0.273852	0.113074	0.412903	0.246032	2.58447	0.0887656	785
BOD1L	0.202548	0.761783	0.0356688	0.265886	0.0468227	0.176101	0.253994	3.19786	0.0369881	785
PTCHD2	0.271338	0.699363	0.0292994	0.387978	0.0418944	0.107981	0.372378	2.32627	0.0301837	785
PCDHB8	0.324841	0.647134	0.0280255	0.501969	0.0433071	0.0862745	0.481132	1.83394	0.0288336	785
PCDHA7_ENST00000525929	0.286624	0.687898	0.0254777	0.416667	0.037037	0.0888889	0.401786	2.20408	0.0261438	785
ASTN2	0.26148	0.6875	0.0510204	0.380334	0.0742115	0.195122	0.354059	2.2	0.0537634	784
CACNA1E_ENST00000358338	0.230867	0.721939	0.0471939	0.319788	0.065371	0.20442	0.300166	2.59633	0.0495315	784
DOCK3	0.244898	0.707908	0.0471939	0.345946	0.0666667	0.192708	0.324324	2.42358	0.0495315	784
TRPM2	0.341837	0.619898	0.0382653	0.55144	0.0617284	0.11194	0.51938	1.63087	0.0397878	784
TSHR	0.123724	0.855867	0.0204082	0.14456	0.023845	0.164948	0.141194	5.93805	0.0208333	784
EPHA6	0.223499	0.731801	0.0446999	0.30541	0.061082	0.2	0.287829	2.72857	0.0467914	783
ADCY2	0.279693	0.692209	0.0280971	0.404059	0.0405904	0.100457	0.388298	2.24896	0.0289093	783
SMG1_ENST00000446231	0.272379	0.684143	0.0434783	0.398131	0.0635514	0.159624	0.374341	2.16599	0.0454545	782
CRIPAK	0.199488	0.783887	0.016624	0.254486	0.0212072	0.0833333	0.249201	3.62722	0.0169051	782
LRBA	0.21767	0.714469	0.0678617	0.304659	0.0949821	0.311765	0.278232	2.50224	0.0728022	781
KIAA2022	0.201024	0.742638	0.056338	0.27069	0.0758621	0.280255	0.251603	2.88557	0.0597015	781
KCNB2	0.254802	0.710627	0.0345711	0.358559	0.0486486	0.135678	0.341924	2.45575	0.035809	781
GLI2	0.297055	0.678617	0.0243278	0.437736	0.0358491	0.0818966	0.422587	2.11155	0.0249344	781
PCDHA6	0.325224	0.664533	0.0102433	0.489403	0.0154143	0.0314961	0.481973	1.98092	0.0103493	781
ITPR2	0.224359	0.728205	0.0474359	0.308099	0.0651408	0.211429	0.289256	2.67925	0.0497981	780
SMG1	0.269231	0.683333	0.0474359	0.393996	0.0694184	0.17619	0.368421	2.15789	0.0497981	780
CPS1	0.232051	0.723077	0.0448718	0.320922	0.0620567	0.19337	0.30217	2.61111	0.0469799	780
DOT1L_ENST00000398665	0.214377	0.758665	0.0269576	0.282572	0.035533	0.125749	0.272876	3.14362	0.0277045	779
U2AF1	0.0333761	0.960205	0.00641849	0.0347594	0.00668449	0.192308	0.0345286	24.129	0.00645995	779
CSF3R	0.269923	0.611825	0.118252	0.441176	0.193277	0.438095	0.369718	1.57616	0.134111	778
CUL9	0.232648	0.735219	0.0321337	0.316434	0.0437063	0.138122	0.303183	2.7767	0.0332005	778
PCDHA11_ENST00000398640	0.343188	0.624679	0.0321337	0.549383	0.0514403	0.093633	0.522505	1.66438	0.0332005	778
CACNA1I_ENST00000402142	0.265122	0.722008	0.01287	0.367201	0.0178253	0.0485437	0.360771	2.59722	0.0130378	777
GOLGA6L2	0.207474	0.780928	0.0115979	0.265677	0.0148515	0.0559006	0.261789	3.56471	0.011734	776
GOLGA6L2_ENST00000567107	0.207474	0.780928	0.0115979	0.265677	0.0148515	0.0559006	0.261789	3.56471	0.011734	776
CFH	0.209032	0.730323	0.0606452	0.286219	0.0830389	0.290123	0.264274	2.70813	0.0645604	775
MDC1	0.170323	0.776774	0.0529032	0.219269	0.0681063	0.310606	0.205288	3.47977	0.0558583	775
PLXNB2	0.300645	0.659355	0.04	0.455969	0.0606654	0.133047	0.429889	1.93561	0.0416667	775
CTNNA2_ENST00000361291	0.267097	0.698065	0.0348387	0.382625	0.0499076	0.130435	0.364437	2.31197	0.0360963	775
ADAMTS7	0.303226	0.672258	0.0245161	0.451056	0.0364683	0.0808511	0.435185	2.05118	0.0251323	775
HGF	0.124191	0.793014	0.0827943	0.156607	0.104405	0.666667	0.141802	3.83125	0.090268	773
KIAA1109_ENST00000455637	0.189119	0.760363	0.0505181	0.248722	0.0664395	0.267123	0.233227	3.17297	0.053206	772
C3	0.272021	0.682642	0.0453368	0.398482	0.0664137	0.166667	0.373665	2.15102	0.0474898	772
PCDHA2	0.264249	0.709845	0.0259067	0.372263	0.0364964	0.0980392	0.359155	2.44643	0.0265957	772
CFTR	0.214008	0.726329	0.0596628	0.294643	0.0821429	0.278788	0.272277	2.65403	0.0634483	771
NLRP13	0.297017	0.648508	0.0544747	0.458	0.084	0.183406	0.422509	1.84502	0.0576132	771
SORCS1_ENST00000344440	0.251621	0.695201	0.0531777	0.36194	0.0764925	0.21134	0.336222	2.28085	0.0561644	771
ADAMTSL1_ENST00000380548	0.286641	0.686122	0.0272374	0.417769	0.0396975	0.0950226	0.401818	2.18595	0.028	771
DMXL1	0.198701	0.738961	0.0623377	0.268893	0.0843585	0.313725	0.247974	2.83085	0.066482	770
FRYL	0.193506	0.748052	0.0584416	0.258681	0.078125	0.302013	0.239936	2.96907	0.062069	770
SZT2_ENST00000562955	0.236364	0.728571	0.0350649	0.324421	0.0481283	0.148352	0.309524	2.68421	0.0363392	770
PCDHGA2	0.284416	0.684416	0.0311688	0.41556	0.0455408	0.109589	0.397459	2.16872	0.0321716	770
MYO7A	0.28961	0.680519	0.0298701	0.425573	0.0438931	0.103139	0.407678	2.13008	0.0307898	770
C5orf42_ENST00000425232	0.169051	0.780234	0.0507152	0.216667	0.065	0.3	0.203443	3.5503	0.0534247	769
PCDHA9_ENST00000532602	0.353706	0.621586	0.0247074	0.569038	0.039749	0.0698529	0.547284	1.64261	0.0253333	769
USP6	0.146023	0.82399	0.029987	0.177215	0.0363924	0.205357	0.170992	4.68148	0.030914	767
TSHZ3	0.298566	0.672751	0.0286832	0.443798	0.0426357	0.0960699	0.425651	2.05578	0.0295302	767
PLCE1	0.221932	0.714099	0.0639687	0.310786	0.0895795	0.288235	0.285235	2.49772	0.0683403	766
ASTN2_ENST00000313400	0.272846	0.680157	0.0469974	0.401152	0.0690979	0.172249	0.375224	2.12653	0.0493151	766
RANBP2	0.227154	0.72846	0.0443864	0.311828	0.0609319	0.195402	0.293919	2.68269	0.0464481	766
CUX1	0.436601	0.487582	0.075817	0.895442	0.155496	0.173653	0.774942	0.951531	0.0820368	765
CNTNAP4_ENST00000478060	0.240838	0.706806	0.052356	0.340741	0.0740741	0.217391	0.317241	2.41071	0.0552486	764
KIAA1217	0.263089	0.710733	0.026178	0.370166	0.0368324	0.0995025	0.357016	2.45701	0.0268817	764
LPHN2_ENST00000370725	0.199214	0.753604	0.0471822	0.264348	0.0626087	0.236842	0.248773	3.05851	0.0495186	763
PLXNA2	0.226737	0.753604	0.0196592	0.30087	0.026087	0.0867052	0.29322	3.05851	0.0200535	763
CDKN2A_ENST00000361570	0.237221	0.752294	0.0104849	0.315331	0.0139373	0.0441989	0.310997	3.03704	0.010596	763
NWD1_ENST00000524140	0.253281	0.698163	0.0485564	0.362782	0.0695489	0.19171	0.339192	2.31304	0.0510345	762
LOXHD1	0.245407	0.717848	0.0367454	0.341865	0.0511883	0.149733	0.325217	2.54419	0.0381471	762
FAT3	0.266404	0.704724	0.0288714	0.378026	0.0409683	0.108374	0.363148	2.38667	0.0297297	762
PLXNA1	0.367937	0.603154	0.0289093	0.610022	0.0479303	0.0785714	0.582121	1.51987	0.02977	761
EPHA6_ENST00000389672	0.230263	0.725	0.0447368	0.317604	0.061706	0.194286	0.299145	2.63636	0.046832	760
EGFL4	0.297368	0.668421	0.0342105	0.444882	0.0511811	0.115044	0.423221	2.01587	0.0354223	760
SIPA1L3	0.277632	0.703947	0.0184211	0.394393	0.0261682	0.0663507	0.384335	2.37778	0.0187668	760
ANKRD17	0.296443	0.679842	0.0237154	0.436047	0.0348837	0.08	0.421348	2.12346	0.0242915	759
HIVEP2	0.24934	0.686016	0.0646438	0.363462	0.0942308	0.259259	0.332162	2.18487	0.0691114	758
ABCC9_ENST00000261201	0.226913	0.721636	0.0514512	0.314442	0.071298	0.226744	0.293515	2.59242	0.054242	758
RPTOR	0.30343	0.663588	0.0329815	0.457256	0.0497018	0.108696	0.435606	1.97255	0.0341064	758
CHEK2	0.23646	0.725231	0.0383091	0.326047	0.0528233	0.162011	0.309689	2.63942	0.0398352	757
MAP1A	0.247028	0.721268	0.0317041	0.342491	0.043956	0.128342	0.32807	2.58768	0.0327422	757
TDRD6	0.199735	0.742063	0.0582011	0.269162	0.0784314	0.291391	0.249587	2.87692	0.0617978	756
IGF2R	0.253968	0.706349	0.0396825	0.359551	0.0561798	0.15625	0.340426	2.40541	0.0413223	756
SIPA1L2	0.263576	0.668874	0.0675497	0.394059	0.10099	0.256281	0.357914	2.02	0.0724432	755
TEK_ENST00000380036	0.35894	0.606623	0.0344371	0.591703	0.0567686	0.095941	0.559917	1.54209	0.0356653	755
SIGLEC1	0.316556	0.658278	0.0251656	0.480885	0.0382294	0.0794979	0.463178	1.92636	0.0258152	755
CR1_ENST00000367049	0.17374	0.750663	0.0755968	0.231449	0.100707	0.435115	0.210273	3.01064	0.0817791	754
PLCH1	0.257294	0.687003	0.0557029	0.374517	0.0810811	0.216495	0.346429	2.19492	0.0589888	754
MYT1L_ENST00000428368	0.309019	0.655172	0.035809	0.47166	0.0546559	0.11588	0.447217	1.9	0.0371389	754
AQP7	0.218833	0.779841	0.00132626	0.280612	0.00170068	0.00606061	0.280136	3.54217	0.00132802	754
NCOR2	0.325365	0.628154	0.0464807	0.51797	0.0739958	0.142857	0.482283	1.68929	0.0487465	753
TMEM132B	0.26162	0.691899	0.0464807	0.378119	0.0671785	0.177665	0.354317	2.24569	0.0487465	753
KALRN	0.243351	0.704787	0.0518617	0.345283	0.0735849	0.213115	0.321617	2.38739	0.0546985	752
LPHN2	0.200798	0.75133	0.0478723	0.267257	0.0637168	0.238411	0.251248	3.02139	0.0502793	752
LAMC3	0.299202	0.671543	0.0292553	0.445545	0.0435644	0.0977778	0.426945	2.04453	0.030137	752
VPS13A_ENST00000376634	0.175766	0.765646	0.0585885	0.229565	0.0765217	0.333333	0.213247	3.26705	0.0622348	751
PREX2_ENST00000354677	0.23036	0.724368	0.045273	0.318015	0.0625	0.196532	0.299308	2.62802	0.0474198	751
CEP350	0.165554	0.766355	0.0680908	0.216028	0.0888502	0.41129	0.1984	3.28	0.0730659	749
C2orf16_ENST00000408964	0.17223	0.771696	0.0560748	0.223183	0.0726644	0.325581	0.208065	3.38012	0.0594059	749
CHD4_ENST00000357008	0.204272	0.750334	0.0453939	0.272242	0.0604982	0.222222	0.256711	3.00535	0.0475524	749
UNC13A	0.259012	0.695594	0.0453939	0.372361	0.0652591	0.175258	0.34955	2.28509	0.0475524	749
DNAH14	0.192513	0.741979	0.065508	0.259459	0.0882883	0.340278	0.238411	2.87565	0.0701001	748
SHANK2_ENST00000338508	0.282086	0.680481	0.0374332	0.414538	0.0550098	0.132701	0.392924	2.12971	0.0388889	748
NIPBL_ENST00000448238	0.190094	0.725569	0.0843373	0.261993	0.116236	0.443662	0.234711	2.6439	0.0921053	747
ABCB1	0.182062	0.756359	0.0615797	0.240708	0.0814159	0.338235	0.222586	3.1044	0.0656205	747
NLRP7_ENST00000328092	0.302544	0.646586	0.0508701	0.467909	0.0786749	0.168142	0.433781	1.82955	0.0535966	747
CHD4	0.198126	0.756359	0.0455154	0.261947	0.060177	0.22973	0.247078	3.1044	0.0476858	747
ADAMTS2	0.277108	0.694779	0.0281124	0.398844	0.0404624	0.101449	0.383333	2.27632	0.0289256	747
WNK2_ENST00000297954	0.297987	0.680537	0.0214765	0.43787	0.0315582	0.0720721	0.424474	2.13025	0.0219479	745
KCNT2	0.223118	0.700269	0.0766129	0.318618	0.109405	0.343373	0.287197	2.33632	0.0829694	744
ABCC8	0.318548	0.649194	0.0322581	0.490683	0.0496894	0.101266	0.467456	1.85057	0.0333333	744
NRXN2	0.319892	0.658602	0.0215054	0.485714	0.0326531	0.0672269	0.470356	1.92913	0.021978	744
C11orf41_ENST00000321505	0.299191	0.668464	0.032345	0.447581	0.0483871	0.108108	0.426923	2.01626	0.0334262	742
DNAH12	0.174089	0.766532	0.0593792	0.227113	0.0774648	0.341085	0.210784	3.28324	0.0631277	741
MYH3	0.319838	0.641026	0.0391363	0.498947	0.0610526	0.122363	0.470238	1.78571	0.0407303	741
PPFIA2	0.164865	0.75	0.0851351	0.21982	0.113514	0.516393	0.197411	3	0.0930576	740
STAT3	0.11502	0.85521	0.02977	0.134494	0.0348101	0.258824	0.129969	5.90654	0.0306834	739
BCORL1_ENST00000303743	0.204885	0.710991	0.0841248	0.288168	0.118321	0.410596	0.257679	2.46009	0.0918519	737
PLCB1	0.256445	0.702849	0.0407056	0.364865	0.0579151	0.15873	0.344891	2.3653	0.0424328	737
KIF4B_ENST00000435029	0.279891	0.6875	0.0326087	0.407115	0.0474308	0.116505	0.388679	2.2	0.0337079	736
NFE2L2	0.0475543	0.930707	0.0217391	0.0510949	0.0233577	0.457143	0.0499287	13.4314	0.0222222	736
TSC1	0.142857	0.688435	0.168707	0.20751	0.245059	1.18095	0.166667	2.20961	0.202946	735
PCDH18	0.208163	0.752381	0.0394558	0.276673	0.0524412	0.189542	0.262887	3.03846	0.0410765	735
KIF4B	0.278912	0.688435	0.0326531	0.405138	0.0474308	0.117073	0.386792	2.20961	0.0337553	735
STK11	0.0531335	0.674387	0.27248	0.0787879	0.40404	5.12821	0.0561151	2.07113	0.374532	734
TRPM3_ENST00000377105	0.239782	0.711172	0.0490463	0.337165	0.0689655	0.204545	0.315412	2.46226	0.0515759	734
ABCA1	0.227831	0.731241	0.0409277	0.311567	0.0559701	0.179641	0.295053	2.72081	0.0426743	733
AFF2_ENST00000370460	0.223738	0.740791	0.0354707	0.302026	0.0478821	0.158537	0.288225	2.85789	0.0367751	733
WNK2	0.280055	0.698087	0.0218579	0.401174	0.0313112	0.0780488	0.388994	2.31222	0.0223464	732
CR1	0.170999	0.74145	0.0875513	0.230627	0.118081	0.512	0.206271	2.86772	0.095952	731
CEP350_ENST00000367607	0.153215	0.777018	0.0697674	0.197183	0.0897887	0.455357	0.180937	3.48466	0.075	731
SAMD9L	0.170999	0.764706	0.0642955	0.223614	0.0840787	0.376	0.206271	3.25	0.0687135	731
SETX	0.198358	0.738714	0.0629275	0.268519	0.0851852	0.317241	0.24744	2.82723	0.0671533	731
INSR	0.333789	0.632011	0.0341997	0.528139	0.0541126	0.102459	0.501027	1.71747	0.0354108	731
ITGAX	0.28591	0.688098	0.0259918	0.415507	0.0377734	0.0909091	0.400383	2.20614	0.0266854	731
AQP7_ENST00000379507	0.207934	0.790698	0.00136799	0.262976	0.0017301	0.00657895	0.262522	3.77778	0.00136986	731
PDGFRB	0.232877	0.719178	0.0479452	0.32381	0.0666667	0.205882	0.303571	2.56098	0.0503597	730
PLCG2_ENST00000359376	0.208219	0.753425	0.0383562	0.276364	0.0509091	0.184211	0.262976	3.05556	0.039886	730
SPTAN1	0.314129	0.620027	0.0658436	0.506637	0.106195	0.209607	0.458	1.63177	0.0704846	729
SLITRK1	0.331962	0.625514	0.042524	0.530702	0.0679825	0.128099	0.49692	1.67033	0.0444126	729
INSR_ENST00000302850	0.32967	0.635989	0.0343407	0.518359	0.0539957	0.104167	0.491803	1.74717	0.0355619	728
PREX1	0.281593	0.700549	0.0178571	0.401961	0.0254902	0.0634146	0.391969	2.33945	0.0181818	728
UNC13A_ENST00000519716	0.257221	0.696011	0.0467675	0.369565	0.0671937	0.181818	0.346296	2.28959	0.049062	727
NLRP8_ENST00000291971	0.268595	0.674931	0.0564738	0.397959	0.0836735	0.210256	0.367232	2.07627	0.059854	726
NWD1	0.264463	0.679063	0.0564738	0.389452	0.0831643	0.213542	0.359551	2.11588	0.059854	726
PLCG2	0.207989	0.753444	0.0385675	0.276051	0.0511883	0.18543	0.262609	3.05587	0.0401146	726
LTBP1	0.278237	0.687328	0.0344353	0.40481	0.0501002	0.123762	0.385496	2.19824	0.0356633	726
KNDC1	0.331956	0.639118	0.0289256	0.519397	0.0452586	0.0871369	0.496907	1.77099	0.0297872	726
DAAM2	0.542069	0.441379	0.0165517	1.22812	0.0375	0.0305344	1.18373	0.790123	0.0168303	725
WBSCR17	0.245856	0.723757	0.0303867	0.339695	0.0419847	0.123596	0.326007	2.62	0.031339	724
ZNF462_ENST00000457913	0.253112	0.702628	0.04426	0.360236	0.0629921	0.174863	0.338889	2.36279	0.0463097	723
C2orf16	0.171745	0.771468	0.0567867	0.222621	0.0736086	0.330645	0.207358	3.37576	0.0602056	722
SZT2	0.242382	0.720222	0.0373961	0.336538	0.0519231	0.154286	0.319927	2.57426	0.0388489	722
ZNF814	0.322715	0.644044	0.033241	0.501075	0.0516129	0.103004	0.476483	1.80934	0.034384	722
TEK	0.365651	0.603878	0.0304709	0.605505	0.0504587	0.0833333	0.576419	1.52448	0.0314286	722
TNS1	0.268698	0.700831	0.0304709	0.383399	0.0434783	0.113402	0.367424	2.34259	0.0314286	722
KIF21B	0.325485	0.645429	0.0290859	0.504292	0.0450644	0.0893617	0.482546	1.82031	0.0299572	722
GTF3C1	0.244105	0.70319	0.0527046	0.34714	0.0749507	0.215909	0.322936	2.36916	0.0556369	721
SPTBN2_ENST00000529997	0.260749	0.701803	0.037448	0.371542	0.0533597	0.143617	0.35272	2.35349	0.0389049	721
ZNF91_ENST00000300619	0.183079	0.783634	0.0332871	0.233628	0.0424779	0.181818	0.224109	3.62179	0.0344333	721
MYH14_ENST00000262269	0.262136	0.718447	0.0194175	0.364865	0.027027	0.0740741	0.355263	2.55172	0.019802	721
KCNH7	0.236111	0.709722	0.0541667	0.332681	0.0763209	0.229412	0.309091	2.44498	0.0572687	720
CACNA1D_ENST00000350061	0.3	0.648611	0.0513889	0.462527	0.0792291	0.171296	0.428571	1.84585	0.0541728	720
AFF3	0.302778	0.663889	0.0333333	0.456067	0.0502092	0.110092	0.434263	1.97521	0.0344828	720
DUSP27	0.226389	0.740278	0.0333333	0.305816	0.0450281	0.147239	0.292639	2.85027	0.0344828	720
COL15A1	0.258333	0.708333	0.0333333	0.364706	0.0470588	0.129032	0.348315	2.42857	0.0344828	720
ADAMTS20_ENST00000553158	0.198887	0.719054	0.0820584	0.276596	0.11412	0.412587	0.248264	2.55941	0.0893939	719
ZZEF1	0.289291	0.664812	0.0458971	0.435146	0.0690377	0.158654	0.407045	1.9834	0.048105	719
LRFN5	0.187761	0.774687	0.0375522	0.24237	0.048474	0.2	0.231164	3.43827	0.0390173	719
COL4A2	0.285118	0.67872	0.0361613	0.420082	0.0532787	0.126829	0.398833	2.11255	0.037518	719
GPRIN2	0.171548	0.824268	0.0041841	0.208122	0.00507614	0.0243902	0.207071	4.69048	0.00420168	717
NLRP7	0.305866	0.641061	0.0530726	0.477124	0.0827887	0.173516	0.440644	1.78599	0.0560472	716
CNOT1	0.206704	0.747207	0.0460894	0.276636	0.0616822	0.222973	0.260563	2.9558	0.0483163	716
GRM5_ENST00000418177	0.23324	0.727654	0.0391061	0.320537	0.0537428	0.167665	0.304189	2.67179	0.0406977	716
KIAA0467_ENST00000372442	0.243017	0.719274	0.0377095	0.337864	0.0524272	0.155172	0.321033	2.56219	0.0391872	716
GRID1	0.280726	0.696927	0.0223464	0.402806	0.0320641	0.079602	0.390291	2.29954	0.0228571	716
GNA11	0.0712291	0.920391	0.00837989	0.07739	0.0091047	0.117647	0.0766917	11.5614	0.0084507	716
TP63	0.186014	0.74965	0.0643357	0.248134	0.0858209	0.345865	0.228522	2.99441	0.0687593	715
GRM7	0.28951	0.648951	0.0615385	0.446121	0.0948276	0.21256	0.40748	1.84861	0.0655738	715
NCOA6	0.318881	0.626573	0.0545455	0.508929	0.0870536	0.171053	0.468172	1.6779	0.0576923	715
UNC5D	0.281119	0.675524	0.0433566	0.416149	0.0641822	0.154229	0.391051	2.0819	0.0453216	715
ENSG00000188219	0.27972	0.699301	0.020979	0.4	0.03	0.075	0.38835	2.32558	0.0214286	715
LAMB4	0.212885	0.740896	0.0462185	0.287335	0.0623819	0.217105	0.270463	2.85946	0.0484581	714
PTPRC	0.203366	0.741935	0.0546985	0.274102	0.073724	0.268966	0.255282	2.875	0.0578635	713
ABCA8	0.2777	0.676017	0.0462833	0.410788	0.0684647	0.166667	0.384466	2.08658	0.0485294	713
DOCK8_ENST00000453981	0.235955	0.69382	0.0702247	0.340081	0.101215	0.297619	0.308824	2.26606	0.0755287	712
MYST3	0.296348	0.650281	0.0533708	0.455724	0.0820734	0.180095	0.421158	1.85944	0.0563798	712
UTP20	0.220506	0.733146	0.0463483	0.300766	0.0632184	0.210191	0.282883	2.74737	0.0486009	712
PCDHB3	0.328652	0.640449	0.0308989	0.513158	0.0482456	0.0940171	0.48954	1.78125	0.0318841	712
HECW2	0.227848	0.725738	0.0464135	0.313953	0.0639535	0.203704	0.295082	2.64615	0.0486726	711
HLA-DRB5	0.116737	0.853727	0.0295359	0.136738	0.0345964	0.253012	0.132166	5.83654	0.0304348	711
ZFYVE26	0.233474	0.73699	0.0295359	0.316794	0.0400763	0.126506	0.304587	2.80214	0.0304348	711
HNRNPCL1	0.19128	0.798875	0.00984529	0.239437	0.0123239	0.0514706	0.236522	3.97203	0.00994318	711
KIAA0947_ENST00000296564	0.192958	0.728169	0.0788732	0.26499	0.108317	0.408759	0.239092	2.67876	0.0856269	710
GRIN3A	0.250704	0.705634	0.043662	0.355289	0.0618762	0.174157	0.334586	2.39713	0.0456554	710
FAM38B_ENST00000302079	0.2567	0.67701	0.0662906	0.379167	0.0979167	0.258242	0.345351	2.09607	0.070997	709
PLCH1_ENST00000340059	0.25811	0.686883	0.0550071	0.37577	0.0800821	0.213115	0.347909	2.19369	0.058209	709
CPS1_ENST00000430249	0.221439	0.734838	0.0437236	0.301344	0.059501	0.197452	0.28442	2.77128	0.0457227	709
PCDHGA1_ENST00000517417	0.25811	0.708039	0.0338505	0.364542	0.0478088	0.131148	0.347909	2.42512	0.0350365	709
KIAA1462	0.275035	0.693935	0.0310296	0.396341	0.0447154	0.112821	0.379377	2.26728	0.0320233	709
COL27A1	0.265162	0.715092	0.0197461	0.370809	0.0276134	0.0744681	0.360845	2.5099	0.0201439	709
ABCB11	0.316384	0.641243	0.0423729	0.493392	0.0660793	0.133929	0.46281	1.7874	0.0442478	708
NF2	0.0480905	0.37058	0.58133	0.129771	1.5687	12.0882	0.0505201	0.588764	1.38851	707
ZEB2	0.285714	0.664781	0.049505	0.429787	0.0744681	0.173267	0.4	1.98312	0.0520833	707
KIF1A	0.264498	0.694484	0.0410184	0.380855	0.0590631	0.15508	0.359615	2.27315	0.0427729	707
XIRP1	0.250354	0.712871	0.0367751	0.35119	0.0515873	0.146893	0.333962	2.48276	0.0381791	707
ZNF676	0.253182	0.712871	0.0339463	0.355159	0.047619	0.134078	0.339015	2.48276	0.0351391	707
VPS13A_ENST00000357409	0.17847	0.763456	0.0580737	0.233766	0.0760668	0.325397	0.217241	3.22754	0.0616541	706
HECTD1	0.266289	0.694051	0.0396601	0.383673	0.0571429	0.148936	0.362934	2.26852	0.0412979	706
SLIT3_ENST00000404867	0.32153	0.645892	0.0325779	0.497807	0.0504386	0.101322	0.473904	1.824	0.033675	706
IGF1R	0.208215	0.76204	0.029745	0.273234	0.0390335	0.142857	0.26297	3.20238	0.0306569	706
CACNA1I_ENST00000336649	0.273371	0.712465	0.0141643	0.383698	0.0198807	0.0518135	0.376218	2.47783	0.0143678	706
KCNH5	0.259574	0.687943	0.0524823	0.37732	0.0762887	0.202186	0.350575	2.20455	0.0553892	705
PCSK5_ENST00000545128	0.228369	0.724823	0.0468085	0.315068	0.0645793	0.204969	0.295956	2.63402	0.0491071	705
SLITRK3	0.237216	0.703125	0.0596591	0.337374	0.0848485	0.251497	0.310987	2.36842	0.0634441	704
CCDC108	0.267425	0.682788	0.0497866	0.391667	0.0729167	0.18617	0.365049	2.15247	0.0523952	703
MYH7B	0.278805	0.697013	0.0241821	0.4	0.0346939	0.0867347	0.386588	2.30047	0.0247813	703
PCDHA10_ENST00000307360	0.29872	0.682788	0.0184922	0.4375	0.0270833	0.0619048	0.425963	2.15247	0.0188406	703
TET2_ENST00000305737	0.0997151	0.584046	0.316239	0.170732	0.541463	3.17143	0.110759	1.40411	0.4625	702
LPHN3_ENST00000507625	0.249288	0.706553	0.0441595	0.352823	0.0625	0.177143	0.332068	2.40777	0.0461997	702
PZP	0.237892	0.725071	0.037037	0.328094	0.0510806	0.155689	0.31215	2.63731	0.0384615	702
CAMTA1	0.319088	0.649573	0.031339	0.491228	0.0482456	0.0982143	0.468619	1.85366	0.0323529	702
SLITRK5	0.283476	0.689459	0.0270655	0.411157	0.0392562	0.0954774	0.395626	2.22018	0.0278184	702
OBSL1_ENST00000404537	0.277778	0.698006	0.0242165	0.397959	0.0346939	0.0871795	0.384615	2.31132	0.0248175	702
POTEF	0.219373	0.760684	0.019943	0.28839	0.0262172	0.0909091	0.281022	3.17857	0.0203488	702
C6	0.239658	0.687589	0.0727532	0.348548	0.105809	0.303571	0.315197	2.20091	0.0784615	701
FRAS1_ENST00000325942	0.223966	0.727532	0.0485021	0.307843	0.0666667	0.216561	0.288603	2.67016	0.0509745	701
NRAP	0.22	0.722857	0.0571429	0.304348	0.0790514	0.25974	0.282051	2.60825	0.0606061	700
DOCK4	0.242857	0.707143	0.05	0.343434	0.0707071	0.205882	0.320755	2.41463	0.0526316	700
MAST4_ENST00000404260	0.27	0.687143	0.0428571	0.392931	0.0623701	0.15873	0.369863	2.19635	0.0447761	700
GRM5	0.227143	0.731429	0.0414286	0.310547	0.0566406	0.18239	0.2939	2.7234	0.0432191	700
WNK1_ENST00000537687	0.254286	0.714286	0.0314286	0.356	0.044	0.123596	0.340996	2.5	0.0324484	700
ATP2B2	0.364286	0.622857	0.0128571	0.584862	0.0206422	0.0352941	0.573034	1.65152	0.0130246	700
KDM5A	0.124464	0.801144	0.074392	0.155357	0.0928571	0.597701	0.142157	4.02878	0.0803709	699
HDAC9_ENST00000262069	0.254649	0.688126	0.0572246	0.370062	0.0831601	0.224719	0.341651	2.20642	0.060698	699
CD163	0.241774	0.716738	0.0414878	0.337325	0.0578842	0.171598	0.318868	2.5303	0.0432836	699
CACNA1I_ENST00000400164	0.273247	0.712446	0.0143062	0.383534	0.0200803	0.052356	0.375984	2.47761	0.0145138	699
ANKRD36C	0.110315	0.84384	0.0458453	0.13073	0.0543294	0.415584	0.123994	5.40367	0.048048	698
ANKRD36C_ENST00000420871	0.110315	0.84384	0.0458453	0.13073	0.0543294	0.415584	0.123994	5.40367	0.048048	698
PKD1L2_ENST00000525539	0.27937	0.684814	0.0358166	0.40795	0.0523013	0.128205	0.387674	2.17273	0.0371471	698
CDH12	0.209469	0.740316	0.0502152	0.282946	0.0678295	0.239726	0.264973	2.85083	0.0528701	697
GRID2	0.193687	0.757532	0.0487805	0.255682	0.0643939	0.251852	0.240214	3.12426	0.0512821	697
PCDHA5	0.322812	0.659971	0.0172166	0.48913	0.026087	0.0533333	0.476695	1.94093	0.0175182	697
ASXL2_ENST00000435504	0.135057	0.738506	0.126437	0.182879	0.171206	0.93617	0.156146	2.82418	0.144737	696
COL19A1	0.178161	0.771552	0.0502874	0.230912	0.0651769	0.282258	0.216783	3.37736	0.0529501	696
PTPN13	0.198561	0.719424	0.0820144	0.276	0.114	0.413043	0.247756	2.5641	0.0893417	695
PPP1R3A_ENST00000284601	0.174352	0.755043	0.0706052	0.230916	0.0935115	0.404959	0.211169	3.08235	0.075969	694
ADAMTS9	0.213256	0.71902	0.0677233	0.296593	0.0941884	0.317568	0.271062	2.55897	0.072643	694
SYNE2_ENST00000357395	0.220461	0.729107	0.0504323	0.302372	0.06917	0.228758	0.28281	2.69149	0.0531108	694
CDH4	0.301153	0.685879	0.0129683	0.439076	0.0189076	0.0430622	0.430928	2.18349	0.0131387	694
KDM5C	0.122832	0.758671	0.118497	0.161905	0.15619	0.964706	0.140033	3.14371	0.134426	692
ITGA8	0.228324	0.709538	0.0621387	0.321792	0.0875764	0.272152	0.29588	2.44279	0.0662558	692
HDAC9	0.25289	0.692197	0.0549133	0.365344	0.0793319	0.217143	0.338491	2.24883	0.058104	692
IRS4	0.25289	0.715318	0.0317919	0.353535	0.0444444	0.125714	0.338491	2.51269	0.0328358	692
LOC65121	0.153401	0.77424	0.0723589	0.198131	0.0934579	0.471698	0.181197	3.42949	0.0780031	691
PRAMEF1	0.153401	0.77424	0.0723589	0.198131	0.0934579	0.471698	0.181197	3.42949	0.0780031	691
COL24A1	0.17945	0.762663	0.0578871	0.235294	0.0759013	0.322581	0.218695	3.21341	0.0614439	691
ABCB5_ENST00000404938	0.186957	0.744928	0.0681159	0.250973	0.0914397	0.364341	0.229947	2.92045	0.0730949	690
EGFR_ENST00000344576	0.189855	0.792754	0.0173913	0.239488	0.0219378	0.0916031	0.234347	3.82517	0.0176991	690
LOXHD1_ENST00000398722	0.259797	0.701016	0.0391872	0.3706	0.0559006	0.150838	0.35098	2.34466	0.0407855	689
KDM5A_ENST00000399788	0.126453	0.806686	0.0668605	0.156757	0.0828829	0.528736	0.144759	4.17293	0.0716511	688
PLCB4	0.203488	0.739826	0.056686	0.275049	0.0766208	0.278571	0.255474	2.84358	0.0600924	688
PCDHB5	0.318314	0.65407	0.0276163	0.486667	0.0422222	0.086758	0.466951	1.89076	0.0284006	688
COL5A2	0.174672	0.790393	0.0349345	0.220994	0.0441989	0.2	0.21164	3.77083	0.0361991	687
PCDHA7	0.292576	0.684134	0.0232897	0.42766	0.0340426	0.079602	0.41358	2.1659	0.023845	687
AXIN1	0.150146	0.653061	0.196793	0.229911	0.301339	1.31068	0.176672	1.88235	0.245009	686
SPTBN1	0.268222	0.667638	0.0641399	0.401747	0.0960699	0.23913	0.366534	2.00877	0.0685358	686
TRHDE	0.230321	0.718659	0.0510204	0.320487	0.0709939	0.221519	0.299242	2.5544	0.0537634	686
PAPPA2_ENST00000367661	0.217201	0.737609	0.0451895	0.294466	0.0612648	0.208054	0.277467	2.81111	0.0473282	686
CAD	0.262391	0.708455	0.0291545	0.37037	0.0411523	0.111111	0.355731	2.43	0.03003	686
LRRIQ1	0.179562	0.724088	0.0963504	0.247984	0.133065	0.536585	0.218861	2.62434	0.106624	685
RUNX1T1_ENST00000265814	0.188321	0.756204	0.0554745	0.249035	0.0733591	0.294574	0.232014	3.1018	0.0587326	685
KIF1A_ENST00000498729	0.265693	0.694891	0.0394161	0.382353	0.0567227	0.148352	0.361829	2.27751	0.0410334	685
ENSG00000205631	0.192982	0.804094	0.00292398	0.24	0.00363636	0.0151515	0.23913	4.10448	0.00293255	684
DST	0.191801	0.729136	0.079063	0.263052	0.108434	0.412214	0.237319	2.69189	0.0858506	683
REV3L	0.187408	0.762811	0.0497804	0.245681	0.0652591	0.265625	0.230631	3.21605	0.0523883	683
LRRK1_ENST00000388948	0.339678	0.626647	0.033675	0.542056	0.0537383	0.0991379	0.514412	1.67843	0.0348485	683
HEATR1	0.241581	0.729136	0.0292826	0.331325	0.0401606	0.121212	0.318533	2.69189	0.0301659	683
TERT	0.354319	0.623719	0.0219619	0.568075	0.0352113	0.0619835	0.548753	1.65759	0.0224551	683
FGFR3_ENST00000340107	0.166911	0.828697	0.00439239	0.201413	0.00530035	0.0263158	0.200351	4.83761	0.00441176	683
DOCK8	0.237537	0.68915	0.0733138	0.344681	0.106383	0.308642	0.311538	2.21698	0.0791139	682
CCDC141_ENST00000420890	0.208211	0.733138	0.058651	0.284	0.08	0.28169	0.262963	2.74725	0.0623053	682
SLC8A1	0.253666	0.706745	0.0395894	0.358921	0.0560166	0.156069	0.339882	2.41	0.0412214	682
PCDHA9	0.367107	0.612335	0.020558	0.59952	0.0335731	0.056	0.580046	1.57955	0.0209895	681
ATP2B2_ENST00000360273	0.359765	0.627019	0.0132159	0.57377	0.0210773	0.0367347	0.561927	1.6811	0.0133929	681
PTPRN2	0.330882	0.651471	0.0176471	0.507901	0.027088	0.0533333	0.494505	1.8692	0.0179641	680
ERBB2_ENST00000541774	0.0852941	0.902941	0.0117647	0.0944625	0.0130293	0.137931	0.0932476	9.30303	0.0119048	680
THBS2	0.351988	0.603829	0.0441826	0.582927	0.0731707	0.125523	0.543182	1.52416	0.046225	679
DOPEY2	0.26215	0.701031	0.0368189	0.37395	0.052521	0.140449	0.355289	2.34483	0.0382263	679
DST_ENST00000370765	0.193215	0.727139	0.079646	0.26572	0.109533	0.412214	0.239488	2.66486	0.0865385	678
SAMD9	0.19469	0.728614	0.0766962	0.267206	0.105263	0.393939	0.241758	2.68478	0.0830671	678
CIT_ENST00000261833	0.255162	0.687316	0.0575221	0.371245	0.083691	0.225434	0.342574	2.19811	0.0610329	678
ADAM29	0.20649	0.744838	0.0486726	0.277228	0.0653465	0.235714	0.260223	2.91908	0.0511628	678
CASR	0.266962	0.69469	0.0383481	0.384289	0.0552017	0.143646	0.364185	2.27536	0.0398773	678
ZNF91	0.187316	0.778761	0.0339233	0.24053	0.0435606	0.181102	0.23049	3.52	0.0351145	678
TSHZ2	0.278761	0.702065	0.019174	0.397059	0.0273109	0.0687831	0.386503	2.35644	0.0195489	678
ERCC2_ENST00000391945	0.278761	0.715339	0.00589971	0.389691	0.00824742	0.021164	0.386503	2.51295	0.00593472	678
IGSF1	0.218612	0.700148	0.0812408	0.312236	0.116034	0.371622	0.279773	2.33498	0.0884244	677
TPR	0.177253	0.745938	0.0768095	0.237624	0.10297	0.433333	0.21544	2.93605	0.0832	677
FRMPD1	0.251108	0.691285	0.0576071	0.363248	0.0833333	0.229412	0.335306	2.23923	0.0611285	677
DOCK4_ENST00000437633	0.237814	0.713442	0.0487445	0.333333	0.068323	0.204969	0.312016	2.48969	0.0512422	677
DOCK10	0.215657	0.737075	0.0472674	0.292585	0.0641283	0.219178	0.274953	2.80337	0.0496124	677
ABCA2	0.310192	0.669129	0.0206795	0.463576	0.0309051	0.0666667	0.449679	2.02232	0.0211161	677
GATA2	0.254062	0.726736	0.0192024	0.349593	0.0264228	0.0755814	0.340594	2.65946	0.0195783	677
CHD8	0.16568	0.742604	0.091716	0.223108	0.123506	0.553571	0.198582	2.88506	0.100977	676
UBR4_ENST00000375226	0.251479	0.702663	0.045858	0.357895	0.0652632	0.182353	0.335968	2.36318	0.048062	676
PCDHB6	0.316568	0.656805	0.0266272	0.481982	0.0405405	0.0841121	0.463203	1.91379	0.0273556	676
DBC1	0.260741	0.688889	0.0503704	0.378495	0.0731183	0.193182	0.352705	2.21429	0.0530421	675
CASZ1	0.32	0.631111	0.0488889	0.507042	0.0774648	0.152778	0.470588	1.71084	0.0514019	675
CHL1	0.211852	0.745185	0.042963	0.284294	0.0576541	0.202797	0.268797	2.92442	0.0448916	675
ATG2A	0.241481	0.737778	0.0207407	0.327309	0.0281124	0.0858896	0.318359	2.81356	0.02118	675
REV3L_ENST00000358835	0.192878	0.759644	0.0474777	0.253906	0.0625	0.246154	0.238971	3.16049	0.0498442	674
RHOA	0.0281899	0.964392	0.0074184	0.0292308	0.00769231	0.263158	0.0290076	27.0833	0.00747384	674
UNC13A_ENST00000252773	0.269345	0.683036	0.047619	0.394336	0.0697168	0.176796	0.368635	2.15493	0.05	672
MST1P9	0.300595	0.662202	0.0372024	0.453933	0.0561798	0.123762	0.429787	1.96035	0.0386399	672
PTPRF	0.303571	0.669643	0.0267857	0.453333	0.04	0.0882353	0.435897	2.02703	0.0275229	672
MUC20	0.159226	0.831845	0.00892857	0.191413	0.0107335	0.0560748	0.189381	4.9469	0.00900901	672
LAMA4	0.256334	0.697466	0.0461997	0.367521	0.0662393	0.180233	0.344689	2.30542	0.0484375	671
GRIA1	0.256334	0.701937	0.0417288	0.36518	0.059448	0.162791	0.344689	2.355	0.0435459	671
COL4A1_ENST00000375815	0.263785	0.701937	0.0342772	0.375796	0.0488323	0.129944	0.3583	2.355	0.0354938	671
PRSS1	0.229508	0.757079	0.0134128	0.30315	0.0177165	0.0584416	0.297872	3.11656	0.0135952	671
PCDHGA1	0.247761	0.714925	0.0373134	0.346555	0.0521921	0.150602	0.329365	2.50785	0.0387597	670
DNMT1	0.223881	0.741791	0.0343284	0.301811	0.0462777	0.153333	0.288462	2.87283	0.0355487	670
PRSS3_ENST00000342836	0.180597	0.816418	0.00298507	0.221207	0.00365631	0.0165289	0.220401	4.44715	0.00299401	670
BZRAP1_ENST00000355701	0.234679	0.726457	0.038864	0.323045	0.0534979	0.165605	0.306641	2.65574	0.0404355	669
SIGLEC1_ENST00000202578	0.333333	0.639761	0.0269058	0.521028	0.0420561	0.0807175	0.5	1.77593	0.0276498	669
TERT_NM_198255.1	0.355755	0.621824	0.0224215	0.572115	0.0360577	0.0630252	0.552204	1.64427	0.0229358	669
TLL1	0.17515	0.76497	0.0598802	0.228963	0.0782779	0.34188	0.212341	3.25478	0.0636943	668
RUNX1T1_ENST00000436581	0.185629	0.755988	0.0583832	0.245545	0.0772277	0.314516	0.227941	3.09816	0.0620032	668
EPB41L3	0.233883	0.697151	0.0689655	0.335484	0.0989247	0.294872	0.305284	2.30198	0.0740741	667
BDP1	0.194903	0.748126	0.0569715	0.260521	0.0761523	0.292308	0.242086	2.97024	0.0604134	667
GRM8_ENST00000358373	0.251874	0.712144	0.035982	0.353684	0.0505263	0.142857	0.336673	2.47396	0.037325	667
RRBP1_ENST00000377813	0.250375	0.715142	0.0344828	0.350105	0.048218	0.137725	0.334	2.51053	0.0357143	667
C9orf79	0.268366	0.706147	0.0254873	0.380042	0.0360934	0.0949721	0.366803	2.40306	0.0261538	667
FRG1B_ENST00000439954	0.0764618	0.89955	0.023988	0.085	0.0266667	0.313725	0.0827922	8.95522	0.0245776	667
MAP3K1_ENST00000399503	0.126126	0.716216	0.157658	0.176101	0.220126	1.25	0.14433	2.52381	0.187166	666
CENPE	0.177177	0.738739	0.0840841	0.239837	0.113821	0.474576	0.215328	2.82759	0.0918033	666
CIT_ENST00000392521	0.253754	0.690691	0.0555556	0.367391	0.0804348	0.218935	0.34004	2.23301	0.0588235	666
GRIK3	0.268769	0.696697	0.0345345	0.385776	0.049569	0.128492	0.367556	2.29703	0.0357698	666
SON	0.304805	0.689189	0.00600601	0.442266	0.0087146	0.0197044	0.438445	2.21739	0.0060423	666
CADPS_ENST00000383710	0.257143	0.685714	0.0571429	0.375	0.0833333	0.222222	0.346154	2.18182	0.0606061	665
BPTF	0.204511	0.745865	0.0496241	0.274194	0.0665323	0.242647	0.257089	2.93491	0.0522152	665
A2ML1	0.275188	0.681203	0.043609	0.403974	0.0640177	0.15847	0.379668	2.13679	0.0455975	665
KIAA1244	0.282707	0.684211	0.0330827	0.413187	0.0483516	0.117021	0.39413	2.16667	0.0342146	665
INTS1	0.350376	0.621053	0.0285714	0.564165	0.0460048	0.0815451	0.539352	1.63889	0.0294118	665
BAI1	0.291729	0.681203	0.0270677	0.428256	0.0397351	0.0927835	0.41189	2.13679	0.0278207	665
TAS2R43	0.132331	0.86015	0.0075188	0.153846	0.00874126	0.0568182	0.152513	6.15054	0.00757576	665
PLCB1_ENST00000378641	0.260542	0.698795	0.0406627	0.372845	0.0581897	0.156069	0.352342	2.32	0.0423862	664
PKDREJ	0.243976	0.725904	0.0301205	0.3361	0.0414938	0.123457	0.322709	2.64835	0.0310559	664
NBEAL2_ENST00000450053	0.274096	0.709337	0.0165663	0.386412	0.0233546	0.0604396	0.377593	2.44041	0.0168453	664
PIK3R1	0.0874811	0.696833	0.215686	0.125541	0.309524	2.46552	0.0958678	2.29851	0.275	663
MYO9A	0.159879	0.788839	0.0512821	0.202677	0.0650096	0.320755	0.190305	3.73571	0.0540541	663
BZRAP1	0.235294	0.72549	0.0392157	0.324324	0.0540541	0.166667	0.307692	2.64286	0.0408163	663
SPTAN1_ENST00000372739	0.326284	0.608761	0.0649547	0.53598	0.1067	0.199074	0.484305	1.55598	0.0694669	662
ABCA3	0.303625	0.6571	0.0392749	0.462069	0.0597701	0.129353	0.436009	1.9163	0.0408805	662
BAZ2B	0.184569	0.74584	0.0695915	0.247465	0.0933063	0.377049	0.226345	2.93452	0.0747967	661
TGFBR2	0.112121	0.789394	0.0984848	0.142035	0.12476	0.878378	0.12628	3.7482	0.109244	660
ABCB11_ENST00000263817	0.328788	0.631818	0.0393939	0.520384	0.0623501	0.119816	0.489842	1.71605	0.0410095	660
LTBP2	0.289394	0.681818	0.0287879	0.424444	0.0422222	0.0994764	0.407249	2.14286	0.0296412	660
NUP210	0.3	0.671212	0.0287879	0.446953	0.0428894	0.0959596	0.428571	2.04147	0.0296412	660
ZNF292_ENST00000369577	0.169954	0.708649	0.121396	0.239829	0.171306	0.714286	0.204753	2.43229	0.138169	659
NLRC5	0.268589	0.661608	0.0698027	0.405963	0.105505	0.259887	0.36722	1.95516	0.0750408	659
TRPA1	0.188164	0.751138	0.060698	0.250505	0.0808081	0.322581	0.231776	3.01829	0.0646204	659
SHROOM3	0.262519	0.701062	0.0364188	0.374459	0.0519481	0.138728	0.355967	2.34518	0.0377953	659
RTL1	0.250379	0.719272	0.030349	0.348101	0.0421941	0.121212	0.334008	2.56216	0.0312989	659
WNK1	0.24431	0.725341	0.030349	0.33682	0.041841	0.124224	0.323293	2.64088	0.0312989	659
KSR2	0.311077	0.663126	0.0257967	0.469108	0.0389016	0.0829268	0.451542	1.96847	0.0264798	659
IRS1	0.183612	0.798179	0.0182094	0.230038	0.0228137	0.0991736	0.224907	3.95489	0.0185471	659
GRIK2_ENST00000421544	0.227964	0.720365	0.0516717	0.316456	0.07173	0.226667	0.295276	2.57609	0.0544872	658
ANK2_ENST00000506722	0.244681	0.721884	0.0334347	0.338947	0.0463158	0.136646	0.323944	2.59563	0.0345912	658
SLX4	0.258752	0.713851	0.0273973	0.362473	0.0383795	0.105882	0.349076	2.49468	0.028169	657
CDH11	0.322679	0.651446	0.0258752	0.495327	0.0397196	0.0801887	0.476404	1.869	0.0265625	657
BAT2D1_ENST00000392078	0.20122	0.721037	0.0777439	0.27907	0.107822	0.386364	0.251908	2.5847	0.0842975	656
MDGA2_ENST00000399232	0.172256	0.76372	0.0640244	0.225549	0.0838323	0.371681	0.208103	3.23226	0.0684039	656
SEMA5A	0.278963	0.667683	0.0533537	0.417808	0.0799087	0.191257	0.386892	2.00917	0.0563607	656
CACNA1F	0.242378	0.72561	0.0320122	0.334034	0.0441176	0.132075	0.31992	2.64444	0.0330709	656
NCAM2	0.215267	0.70229	0.0824427	0.306522	0.117391	0.382979	0.274319	2.35897	0.0898502	655
NTRK1	0.210687	0.760305	0.0290076	0.277108	0.0381526	0.137681	0.266925	3.17197	0.0298742	655
HCFC1_ENST00000310441	0.31145	0.680916	0.00763359	0.457399	0.0112108	0.0245098	0.452328	2.13397	0.00769231	655
RNF43	0.088685	0.703364	0.207951	0.126087	0.295652	2.34483	0.0973154	2.37113	0.262548	654
PPFIA2_ENST00000333447	0.159021	0.756881	0.0840979	0.210101	0.111111	0.528846	0.189091	3.11321	0.0918197	654
RUNX1T1	0.191131	0.750765	0.058104	0.254582	0.0773931	0.304	0.236295	3.01227	0.0616883	654
DIP2C	0.284404	0.668196	0.0474006	0.425629	0.0709382	0.166667	0.397436	2.01382	0.0497592	654
NID2	0.197248	0.759939	0.0428135	0.259557	0.056338	0.217054	0.245714	3.16561	0.0447284	654
EPG5	0.237003	0.724771	0.0382263	0.327004	0.0527426	0.16129	0.310621	2.63333	0.0397456	654
CEP192_ENST00000506447	0.185015	0.779817	0.0351682	0.237255	0.045098	0.190083	0.227017	3.54167	0.0364501	654
NLRP12	0.30581	0.665138	0.029052	0.45977	0.0436782	0.095	0.440529	1.9863	0.0299213	654
NPHS1	0.269113	0.711009	0.0198777	0.378495	0.027957	0.0738636	0.368201	2.46032	0.0202808	654
AR_ENST00000544984	0.171516	0.770291	0.058193	0.222664	0.0755467	0.339286	0.207024	3.35333	0.0617886	653
COL4A6	0.206738	0.739663	0.0535988	0.279503	0.0724638	0.259259	0.260618	2.84118	0.0566343	653
RGPD4	0.137825	0.831547	0.0306279	0.165746	0.0368324	0.222222	0.159858	4.93636	0.0315956	653
SMO	0.0995406	0.871363	0.0290965	0.114236	0.0333919	0.292308	0.110544	6.77381	0.0299685	653
PPP2R1A	0.107198	0.871363	0.0214395	0.123023	0.0246046	0.2	0.120069	6.77381	0.0219092	653
CSF1R	0.228528	0.723926	0.047546	0.315678	0.065678	0.208054	0.296223	2.62222	0.0499195	652
IKZF1_ENST00000331340	0.254601	0.71319	0.0322086	0.356989	0.0451613	0.126506	0.341564	2.48663	0.0332805	652
PCDHB4	0.265337	0.702454	0.0322086	0.377729	0.0458515	0.121387	0.361169	2.36082	0.0332805	652
PLCG1	0.16411	0.81135	0.0245399	0.202268	0.0302457	0.149533	0.19633	4.30081	0.0251572	652
RICTOR	0.133641	0.801843	0.0645161	0.166667	0.0804598	0.482759	0.154255	4.04651	0.0689655	651
BPTF_ENST00000335221	0.209231	0.743077	0.0476923	0.281573	0.0641822	0.227941	0.264591	2.89222	0.0500808	650
EVC2	0.244615	0.707692	0.0476923	0.345652	0.0673913	0.194969	0.323829	2.42105	0.0500808	650
UNC5D_ENST00000404895	0.286154	0.669231	0.0446154	0.427586	0.0666667	0.155914	0.400862	2.02326	0.0466989	650
NLRP2_ENST00000543010	0.343077	0.616923	0.04	0.55611	0.0648379	0.116592	0.522248	1.61044	0.0416667	650
PCDHB12	0.290769	0.681538	0.0276923	0.426637	0.0406321	0.0952381	0.409978	2.1401	0.028481	650
PCDHB16	0.295385	0.681538	0.0230769	0.433409	0.03386	0.078125	0.419214	2.1401	0.023622	650
PREX1_ENST00000396220	0.283077	0.695385	0.0215385	0.40708	0.0309735	0.076087	0.39485	2.28283	0.0220126	650
CHD9	0.218798	0.725732	0.05547	0.301486	0.0764331	0.253521	0.280079	2.64607	0.0587276	649
EFCAB6	0.251156	0.701079	0.0477658	0.358242	0.0681319	0.190184	0.335391	2.34536	0.0501618	649
NLRP7_ENST00000446217	0.323575	0.628659	0.0477658	0.514706	0.0759804	0.147619	0.47836	1.69295	0.0501618	649
CLSTN2	0.285054	0.679507	0.0354391	0.419501	0.0521542	0.124324	0.398707	2.12019	0.0367412	649
SEC16A_NM_014866.1	0.307099	0.646605	0.0462963	0.47494	0.071599	0.150754	0.443207	1.82969	0.0485437	648
PCDHGA3_ENST00000253812	0.337963	0.62963	0.0324074	0.536765	0.0514706	0.0958904	0.51049	1.7	0.0334928	648
XDH	0.262346	0.709877	0.0277778	0.369565	0.0391304	0.105882	0.355649	2.44681	0.0285714	648
MYO10	0.292117	0.658423	0.049459	0.443662	0.0751174	0.169312	0.412664	1.9276	0.0520325	647
NID1	0.27357	0.683153	0.0432767	0.400452	0.0633484	0.158192	0.376596	2.1561	0.0452342	647
WNK2_ENST00000395477	0.301391	0.675425	0.0231839	0.446224	0.0343249	0.0769231	0.431416	2.08095	0.0237342	647
POTEC	0.224111	0.763524	0.0123648	0.293522	0.0161943	0.0551724	0.288845	3.22876	0.0125196	647
C10orf71_ENST00000374144	0.244582	0.73065	0.0247678	0.334746	0.0338983	0.101266	0.32377	2.71264	0.0253968	646
JAK3_ENST00000458235	0.182946	0.767442	0.0496124	0.238384	0.0646465	0.271186	0.223909	3.3	0.0522023	645
PRPF8	0.311628	0.64031	0.048062	0.486683	0.0750605	0.154229	0.452703	1.78017	0.0504886	645
CNTN4_ENST00000418658	0.271318	0.686822	0.0418605	0.395034	0.0609481	0.154286	0.37234	2.19307	0.0436893	645
ABCA6	0.206522	0.717391	0.076087	0.287879	0.106061	0.368421	0.260274	2.53846	0.0823529	644
PDZRN4_ENST00000402685	0.226708	0.709627	0.0636646	0.319475	0.0897155	0.280822	0.293173	2.44385	0.0679934	644
IGSF3_ENST00000369483	0.231726	0.718507	0.0497667	0.322511	0.0692641	0.214765	0.301619	2.55249	0.0523732	643
GRIA2	0.261275	0.696734	0.0419907	0.375	0.0602679	0.160714	0.353684	2.29744	0.0438312	643
COL4A3	0.186625	0.77605	0.037325	0.240481	0.0480962	0.2	0.229446	3.46528	0.0387722	643
PRSS3	0.191291	0.805599	0.00311042	0.237452	0.003861	0.0162602	0.236538	4.144	0.00312012	643
SETX_ENST00000372169	0.202492	0.744548	0.0529595	0.271967	0.0711297	0.261538	0.253906	2.91463	0.0559211	642
ABCC11	0.281931	0.682243	0.0358255	0.413242	0.0525114	0.127072	0.392625	2.14706	0.0371567	642
KIAA1211	0.246106	0.725857	0.0280374	0.339056	0.0386266	0.113924	0.326446	2.64773	0.0288462	642
BAT2D1	0.204368	0.722309	0.0733229	0.282937	0.101512	0.358779	0.256863	2.60112	0.0791246	641
MYOF	0.212168	0.733229	0.0546022	0.289362	0.0744681	0.257353	0.269307	2.74854	0.0577558	641
SIPA1L1	0.237129	0.716069	0.0468019	0.331155	0.0653595	0.197368	0.310838	2.52198	0.0490998	641
GRIA1_ENST00000544403	0.24493	0.714509	0.0405616	0.342795	0.0567686	0.165605	0.32438	2.50273	0.0422764	641
PTCHD2_ENST00000389575	0.271451	0.703588	0.024961	0.385809	0.0354767	0.091954	0.372591	2.37368	0.0256	641
SEZ6L	0.29375	0.664062	0.0421875	0.442353	0.0635294	0.143617	0.415929	1.97674	0.0440457	640
CD163_ENST00000396620	0.257812	0.703125	0.0390625	0.366667	0.0555556	0.151515	0.347368	2.36842	0.0406504	640
ATP10B	0.254688	0.707812	0.0375	0.359823	0.0529801	0.147239	0.341719	2.42246	0.038961	640
TLR4	0.230047	0.710485	0.0594679	0.323789	0.0837004	0.258503	0.29878	2.45405	0.063228	639
NLRP4_ENST00000587891	0.306729	0.647887	0.0453834	0.47343	0.0700483	0.147959	0.442438	1.84	0.047541	639
ENSG00000250423	0.209703	0.751174	0.0391236	0.279167	0.0520833	0.186567	0.265347	3.01887	0.0407166	639
FANCM	0.172414	0.739812	0.0877743	0.233051	0.118644	0.509091	0.208333	2.84337	0.0962199	638
AGRN	0.260188	0.717868	0.0219436	0.362445	0.0305677	0.0843373	0.351695	2.54444	0.0224359	638
NUP210L	0.213501	0.709576	0.0769231	0.300885	0.108407	0.360294	0.271457	2.44324	0.0833333	637
STXBP5L	0.180534	0.77394	0.0455259	0.233266	0.0588235	0.252174	0.220307	3.42361	0.0476974	637
DCC_ENST00000412726	0.226415	0.709119	0.0644654	0.31929	0.0909091	0.284722	0.292683	2.43784	0.0689076	636
HNF1A	0.207547	0.746855	0.0455975	0.277895	0.0610526	0.219697	0.261905	2.95031	0.0477759	636
GRIA2_ENST00000264426	0.254717	0.70283	0.0424528	0.362416	0.0604027	0.166667	0.341772	2.36508	0.044335	636
LRP5	0.327044	0.658805	0.0141509	0.49642	0.0214797	0.0432692	0.485981	1.93088	0.0143541	636
ASCC3	0.168504	0.751181	0.080315	0.224319	0.106918	0.476636	0.202652	3.01899	0.0873288	635
RNF17_ENST00000255324	0.209449	0.71811	0.0724409	0.291667	0.100877	0.345865	0.26494	2.54749	0.0780985	635
MPDZ	0.23622	0.699213	0.0645669	0.337838	0.0923423	0.273333	0.309278	2.32461	0.0690236	635
FSTL5	0.195276	0.741732	0.0629921	0.26327	0.0849257	0.322581	0.242661	2.87195	0.0672269	635
TMPRSS15	0.225197	0.716535	0.0582677	0.314286	0.0813187	0.258741	0.29065	2.52778	0.0618729	635
IGSF3	0.229921	0.722835	0.0472441	0.318083	0.0653595	0.205479	0.298569	2.60795	0.0495868	635
PDZRN3	0.291339	0.675591	0.0330709	0.431235	0.048951	0.113514	0.411111	2.08252	0.034202	635
NTRK1_ENST00000392302	0.207874	0.765354	0.0267717	0.271605	0.0349794	0.128788	0.262425	3.26174	0.0275081	635
YLPM1_ENST00000325680	0.206625	0.665615	0.12776	0.310427	0.191943	0.618321	0.260437	1.99057	0.146474	634
ZNF292	0.16877	0.712934	0.118297	0.236726	0.165929	0.700935	0.203036	2.48352	0.134168	634
SEC16A	0.312303	0.640379	0.0473186	0.487685	0.0738916	0.151515	0.454128	1.7807	0.0496689	634
PRSS3_ENST00000361005	0.189274	0.807571	0.00315457	0.234375	0.00390625	0.0166667	0.233463	4.19672	0.00316456	634
ZNF429	0.266983	0.709321	0.0236967	0.376392	0.0334076	0.0887574	0.364224	2.44022	0.0242718	633
CDK12	0.150316	0.735759	0.113924	0.204301	0.154839	0.757895	0.176909	2.78443	0.128571	632
DPYD	0.169304	0.781646	0.0490506	0.216599	0.062753	0.28972	0.20381	3.57971	0.0515807	632
EGFLAM	0.245253	0.705696	0.0490506	0.347534	0.0695067	0.2	0.324948	2.39785	0.0515807	632
SLC25A5	0.137658	0.822785	0.039557	0.167308	0.0480769	0.287356	0.159633	4.64286	0.0411862	632
COL18A1	0.376582	0.60443	0.0189873	0.623037	0.0314136	0.0504202	0.604061	1.528	0.0193548	632
SI_ENST00000264382	0.153724	0.779715	0.066561	0.197154	0.0853659	0.43299	0.181648	3.53957	0.0713073	631
DIS3	0.223455	0.74168	0.0348653	0.301282	0.0470085	0.156028	0.287755	2.87117	0.0361248	631
KIF21B_ENST00000422435	0.339144	0.630745	0.0301109	0.537688	0.0477387	0.088785	0.513189	1.70815	0.0310458	631
JARID2	0.44374	0.538827	0.0174326	0.823529	0.0323529	0.0392857	0.797721	1.16838	0.0177419	631
ENSG00000093100	0.304762	0.646032	0.0492063	0.471744	0.0761671	0.161458	0.438356	1.82511	0.0517529	630
PTPRN2_ENST00000404321	0.334921	0.647619	0.0174603	0.517157	0.0269608	0.0521327	0.50358	1.83784	0.0177706	630
NIN	0.224165	0.713831	0.0620032	0.314031	0.0868597	0.276596	0.288934	2.49444	0.0661017	629
MAP2K3_ENST00000316920	0.27186	0.680445	0.0476948	0.399533	0.0700935	0.175439	0.373362	2.12935	0.0500835	629
ABCA8_ENST00000430352	0.290938	0.670906	0.0381558	0.433649	0.056872	0.131148	0.410314	2.03865	0.0396694	629
PCDHA5_ENST00000529619	0.324324	0.653418	0.0222576	0.49635	0.0340633	0.0686275	0.48	1.88532	0.0227642	629
DPP10_ENST00000410059	0.210191	0.724522	0.0652866	0.29011	0.0901099	0.310606	0.266129	2.63006	0.0698467	628
MED12_ENST00000333646	0.101911	0.840764	0.0573248	0.121212	0.0681818	0.5625	0.113475	5.28	0.0608108	628
COL6A3_ENST00000392004	0.297771	0.681529	0.0207006	0.436916	0.0303738	0.0695187	0.424036	2.14	0.0211382	628
SON_ENST00000300278	0.332803	0.66242	0.00477707	0.502404	0.00721154	0.0143541	0.498807	1.96226	0.0048	628
ANO4	0.213716	0.719298	0.0669856	0.297118	0.0931264	0.313433	0.271805	2.5625	0.0717949	627
ARMC4	0.213716	0.727273	0.0590112	0.29386	0.0811404	0.276119	0.271805	2.66667	0.0627119	627
EXPH5	0.216906	0.736842	0.046252	0.294372	0.0627706	0.213235	0.276986	2.8	0.048495	627
TLN1	0.236045	0.722488	0.0414673	0.326711	0.0573951	0.175676	0.308977	2.60345	0.0432612	627
COL18A1_ENST00000359759	0.385965	0.598086	0.015949	0.645333	0.0266667	0.0413223	0.628571	1.4881	0.0162075	627
ZNF407	0.273163	0.680511	0.0463259	0.401408	0.0680751	0.169591	0.375824	2.13	0.0485762	626
MBD5	0.260383	0.701278	0.0383387	0.371298	0.0546697	0.147239	0.352052	2.34759	0.0398671	626
PLXNA3	0.290735	0.694888	0.014377	0.418391	0.0206897	0.0494505	0.40991	2.27749	0.0145867	626
WDR17	0.2016	0.7472	0.0512	0.269807	0.0685225	0.253968	0.252505	2.9557	0.0539629	625
ST18	0.2112	0.7456	0.0432	0.283262	0.0579399	0.204545	0.267748	2.93082	0.0451505	625
DLGAP2_ENST00000356067	0.312	0.6576	0.0304	0.474453	0.0462287	0.0974359	0.453488	1.92056	0.0313531	625
DCHS2_ENST00000339452	0.2608	0.7168	0.0224	0.363839	0.03125	0.0858896	0.352814	2.53107	0.0229133	625
RBM10	0.0865385	0.589744	0.323718	0.146739	0.548913	3.74074	0.0947368	1.4375	0.478673	624
MORC1	0.219551	0.724359	0.0560897	0.303097	0.0774336	0.255474	0.281314	2.62791	0.0594228	624
ZNF236	0.258427	0.672552	0.0690209	0.384248	0.102625	0.267081	0.348485	2.05392	0.0741379	623
TPO_ENST00000337415	0.292135	0.675762	0.0321027	0.432304	0.0475059	0.10989	0.412698	2.08416	0.0331675	623
BAHCC1	0.298555	0.683788	0.0176565	0.43662	0.0258216	0.0591398	0.425629	2.16244	0.0179739	623
AQP7_ENST00000539936	0.203852	0.796148	0	0.256048	0	0	0.256048	3.90551	0	623
KDM5C_ENST00000375401	0.131833	0.766881	0.101286	0.171908	0.132075	0.768293	0.151852	3.28966	0.112701	622
ABCC12	0.271704	0.694534	0.0337621	0.391204	0.0486111	0.12426	0.373068	2.27368	0.0349418	622
TIAM2	0.268489	0.697749	0.0337621	0.384793	0.0483871	0.125749	0.367033	2.30851	0.0349418	622
PCDHA11	0.360129	0.609325	0.0305466	0.591029	0.0501319	0.0848214	0.562814	1.55967	0.0315091	622
RREB1	0.307074	0.665595	0.0273312	0.461353	0.0410628	0.0890052	0.443155	1.99038	0.0280992	622
POM121L12	0.33119	0.652733	0.0160772	0.507389	0.0246305	0.0485437	0.495192	1.87963	0.0163399	622
KIAA1244_ENST00000251691	0.286634	0.681159	0.0322061	0.420804	0.0472813	0.11236	0.401806	2.13636	0.0332779	621
ADCY1	0.2657	0.711755	0.0225443	0.373303	0.0316742	0.0848485	0.361842	2.46927	0.0230643	621
PIKFYVE	0.206452	0.741935	0.0516129	0.278261	0.0695652	0.25	0.260163	2.875	0.0544218	620
GRIK2	0.230645	0.719355	0.05	0.320628	0.0695067	0.216783	0.29979	2.56322	0.0526316	620
C20orf26	0.254839	0.696774	0.0483871	0.365741	0.0694444	0.189873	0.341991	2.29787	0.0508475	620
ADAMTS5	0.266129	0.691935	0.0419355	0.384615	0.0606061	0.157576	0.362637	2.24607	0.043771	620
FANCA	0.191935	0.769355	0.0387097	0.249476	0.0503145	0.201681	0.237525	3.33566	0.0402685	620
SHANK2	0.295161	0.685484	0.0193548	0.430588	0.0282353	0.0655738	0.418764	2.17949	0.0197368	620
MYH14_ENST00000440075	0.275806	0.706452	0.0177419	0.390411	0.0251142	0.0643275	0.380846	2.40659	0.0180624	620
NUMA1	0.23748	0.710824	0.0516963	0.334091	0.0727273	0.217687	0.311441	2.4581	0.0545145	619
C5orf42	0.177706	0.775444	0.0468498	0.229167	0.0604167	0.263636	0.21611	3.45324	0.0491525	619
CTNNA3	0.214863	0.741519	0.0436187	0.28976	0.0588235	0.203008	0.273663	2.86875	0.0456081	619
CTNNA3_ENST00000433211	0.218094	0.741519	0.0403877	0.294118	0.0544662	0.185185	0.278926	2.86875	0.0420875	619
KIF26A	0.306947	0.652666	0.0403877	0.470297	0.0618812	0.131579	0.44289	1.87907	0.0420875	619
ATP8A2	0.235864	0.725363	0.0387722	0.325167	0.0534521	0.164384	0.308668	2.64118	0.0403361	619
KCNT1	0.326333	0.644588	0.0290792	0.506266	0.0451128	0.0891089	0.484412	1.81364	0.0299501	619
MYO9B_ENST00000319396	0.274637	0.714055	0.0113086	0.384615	0.0158371	0.0411765	0.378619	2.49718	0.0114379	619
CDH6	0.268608	0.68123	0.0501618	0.394299	0.0736342	0.186747	0.367257	2.13706	0.0528109	618
A2M	0.255663	0.697411	0.0469256	0.366589	0.0672854	0.183544	0.343478	2.30481	0.049236	618
TTC3	0.197411	0.755663	0.0469256	0.261242	0.0620985	0.237705	0.245968	3.09272	0.049236	618
KAT6B	0.275081	0.679612	0.0453074	0.404762	0.0666667	0.164706	0.379464	2.12121	0.0474576	618
PLXND1	0.359223	0.616505	0.0242718	0.582677	0.0393701	0.0675676	0.560606	1.60759	0.0248756	618
CCDC88C	0.300971	0.676375	0.0226537	0.444976	0.0334928	0.0752688	0.430556	2.09	0.0231788	618
NRK_ENST00000428173	0.192869	0.727715	0.0794165	0.265033	0.109131	0.411765	0.238956	2.67262	0.0862676	617
PIK3C2G_ENST00000538779	0.0940032	0.844408	0.0615883	0.111324	0.0729367	0.655172	0.103757	5.42708	0.0656304	617
KIAA0100	0.235008	0.71637	0.0486224	0.328054	0.0678733	0.206897	0.307203	2.52571	0.0511073	617
ARHGEF17	0.226904	0.743922	0.0291734	0.305011	0.0392157	0.128571	0.293501	2.90506	0.0300501	617
COL6A2	0.294976	0.692058	0.012966	0.42623	0.0187354	0.043956	0.418391	2.24737	0.0131363	617
COL2A1_ENST00000380518	0.191558	0.74513	0.0633117	0.257081	0.0849673	0.330508	0.236948	2.92357	0.067591	616
PLCE1_ENST00000371375	0.227273	0.711039	0.0616883	0.319635	0.086758	0.271429	0.294118	2.46067	0.0657439	616
CDH7	0.237013	0.725649	0.0373377	0.326622	0.0514541	0.157534	0.310638	2.64497	0.0387858	616
COL4A5_ENST00000328300	0.232143	0.730519	0.0373377	0.317778	0.0511111	0.160839	0.302326	2.71084	0.0387858	616
KNDC1_ENST00000368572	0.344156	0.62987	0.025974	0.546392	0.0412371	0.0754717	0.524752	1.70175	0.0266667	616
NDST4	0.19187	0.736585	0.0715447	0.260486	0.0971302	0.372881	0.237425	2.7963	0.0770578	615
POLD1	0.209756	0.772358	0.0178862	0.271579	0.0231579	0.0852713	0.265432	3.39286	0.0182119	615
PCDHB10	0.333333	0.650407	0.0162602	0.5125	0.025	0.0487805	0.5	1.86047	0.0165289	615
COBL	0.275244	0.643322	0.0814332	0.427848	0.126582	0.295858	0.379775	1.80365	0.0886525	614
FAM83B	0.188925	0.739414	0.0716612	0.255507	0.0969163	0.37931	0.232932	2.8375	0.077193	614
STARD9_ENST00000290607	0.216612	0.7443	0.0390879	0.291028	0.0525164	0.180451	0.276507	2.91083	0.040678	614
PRRC2B	0.273616	0.700326	0.0260586	0.390698	0.0372093	0.0952381	0.376682	2.33696	0.0267559	614
EPHA3_ENST00000452448	0.125612	0.774878	0.0995106	0.162105	0.128421	0.792208	0.143657	3.44203	0.110507	613
TBX3	0.125612	0.805873	0.0685155	0.15587	0.0850202	0.545455	0.143657	4.15126	0.0735552	613
MYOCD	0.24633	0.694943	0.0587276	0.35446	0.084507	0.238411	0.32684	2.27807	0.0623917	613
CTTNBP2	0.190865	0.763458	0.045677	0.25	0.0598291	0.239316	0.235887	3.22759	0.0478632	613
PLEKHG4B_ENST00000283426	0.293638	0.670473	0.0358891	0.437956	0.053528	0.122222	0.415704	2.03465	0.037225	613
SNRNP200	0.323002	0.644372	0.0326264	0.501266	0.0506329	0.10101	0.477108	1.81193	0.0337268	613
PCDH19	0.30832	0.665579	0.0261011	0.463235	0.0392157	0.0846561	0.445755	1.99024	0.0268007	613
CADPS	0.230392	0.705882	0.0637255	0.326389	0.0902778	0.276596	0.299363	2.4	0.0680628	612
TRPM1	0.267974	0.678105	0.0539216	0.395181	0.0795181	0.20122	0.366071	2.1066	0.0569948	612
CCDC165	0.243464	0.715686	0.0408497	0.340183	0.0570776	0.167785	0.321814	2.51724	0.0425894	612
PZP_ENST00000381997	0.238562	0.723856	0.0375817	0.329571	0.0519187	0.157534	0.313305	2.6213	0.0390492	612
TUBGCP6	0.331699	0.637255	0.0310458	0.520513	0.0487179	0.0935961	0.496333	1.75676	0.0320405	612
DLG5	0.287582	0.691176	0.0212418	0.416076	0.0307329	0.0738636	0.40367	2.2381	0.0217028	612
PCNX	0.201309	0.721768	0.0769231	0.278912	0.106576	0.382114	0.252049	2.59412	0.0833333	611
TNRC6A	0.224223	0.723404	0.0523732	0.309955	0.0723982	0.233577	0.28903	2.61538	0.0552677	611
LRRC4C	0.253682	0.700491	0.0458265	0.36215	0.0654206	0.180645	0.339912	2.3388	0.0480274	611
CDH7_ENST00000323011	0.235679	0.726678	0.0376432	0.324324	0.0518018	0.159722	0.308351	2.65868	0.0391156	611
USP9X	0.190164	0.704918	0.104918	0.269767	0.148837	0.551724	0.234818	2.38889	0.117216	610
FILIP1	0.231148	0.690164	0.0786885	0.334917	0.114014	0.340426	0.30064	2.22751	0.0854093	610
TRPC4	0.236066	0.727869	0.0360656	0.324324	0.0495495	0.152778	0.309013	2.6747	0.037415	610
TRPC4_ENST00000379681	0.234426	0.731148	0.0344262	0.320628	0.0470852	0.146853	0.30621	2.71951	0.0356537	610
DLGAP2	0.309836	0.657377	0.0327869	0.471322	0.0498753	0.10582	0.448931	1.91866	0.0338983	610
AGBL1	0.265574	0.703279	0.0311475	0.377622	0.044289	0.117284	0.361607	2.37017	0.0321489	610
IGSF9B_ENST00000321016	0.300493	0.655172	0.044335	0.458647	0.0676692	0.147541	0.429577	1.9	0.0463918	609
PRRC2B_ENST00000357304	0.27422	0.697865	0.0279146	0.392941	0.04	0.101796	0.377828	2.30978	0.0287162	609
MYO9B	0.279146	0.711002	0.00985222	0.39261	0.0138568	0.0352941	0.387244	2.46023	0.00995025	609
BRWD3	0.184211	0.738487	0.0773026	0.249443	0.104677	0.419643	0.225806	2.8239	0.083779	608
ITGB4	0.284539	0.675987	0.0394737	0.420925	0.0583942	0.138728	0.397701	2.08629	0.0410959	608
DPP10	0.204283	0.729819	0.0658979	0.27991	0.0902935	0.322581	0.256729	2.70122	0.0705467	607
RIF1	0.194399	0.749588	0.0560132	0.259341	0.0747253	0.288136	0.241309	2.99342	0.0593368	607
TAF1	0.121911	0.835255	0.0428336	0.145957	0.0512821	0.351351	0.138837	5.07	0.0447504	607
PPL	0.289951	0.668863	0.0411862	0.433498	0.0615764	0.142045	0.408353	2.0199	0.0429553	607
DGKI	0.234323	0.694719	0.0709571	0.337292	0.102138	0.302817	0.306034	2.27568	0.0763766	606
NIN_ENST00000245441	0.224422	0.707921	0.0676568	0.317016	0.0955711	0.301471	0.289362	2.42373	0.0725664	606
TNRC6B_ENST00000454349	0.272727	0.591736	0.135537	0.460894	0.22905	0.49697	0.375	1.44939	0.156788	605
PTPRK	0.21157	0.730579	0.0578512	0.289593	0.0791855	0.273438	0.268344	2.71166	0.0614035	605
TMEM132C_ENST00000435159	0.287603	0.692562	0.0198347	0.415274	0.0286396	0.0689655	0.403712	2.25269	0.0202361	605
CTCF	0.0943709	0.735099	0.17053	0.128378	0.231982	1.80702	0.104205	2.775	0.205589	604
SLC12A5	0.296358	0.677152	0.0264901	0.437653	0.0391198	0.0893855	0.421176	2.09744	0.0272109	604
PLCL1	0.197347	0.73466	0.0679934	0.268623	0.0925508	0.344538	0.245868	2.76875	0.0729537	603
ACTN2	0.298507	0.646766	0.0547264	0.461538	0.0846154	0.183333	0.425532	1.83099	0.0578947	603
RREB1_ENST00000379938	0.315091	0.6534	0.0315091	0.482234	0.0482234	0.1	0.460048	1.88517	0.0325342	603
BRD4_ENST00000263377	0.172471	0.797678	0.0298507	0.216216	0.037422	0.173077	0.208417	3.94262	0.0307692	603
CABIN1	0.238806	0.731343	0.0298507	0.326531	0.0408163	0.125	0.313725	2.72222	0.0307692	603
PCDHB15	0.311774	0.661692	0.026534	0.471178	0.0401003	0.0851064	0.453012	1.95588	0.0272572	603
RICTOR_ENST00000296782	0.131229	0.803987	0.0647841	0.163223	0.0805785	0.493671	0.151052	4.10169	0.0692718	602
SCN8A	0.255814	0.707641	0.0365449	0.361502	0.0516432	0.142857	0.34375	2.42045	0.037931	602
ALPK3	0.269103	0.696013	0.0348837	0.386635	0.0501193	0.12963	0.368182	2.28962	0.0361446	602
MECOM	0.240864	0.732558	0.0265781	0.328798	0.0362812	0.110345	0.317287	2.73913	0.0273038	602
TAS2R31	0.192691	0.789037	0.0182724	0.244211	0.0231579	0.0948276	0.238683	3.74016	0.0186125	602
MUC21	0.260797	0.73588	0.00332226	0.354402	0.00451467	0.0127389	0.352809	2.78616	0.00333333	602
NIN_ENST00000382041	0.227953	0.707155	0.0648918	0.322353	0.0917647	0.284672	0.295259	2.41477	0.069395	601
ADCY10	0.267887	0.682196	0.0499168	0.392683	0.0731707	0.186335	0.365909	2.1466	0.0525394	601
DOCK10_ENST00000409592	0.222962	0.733777	0.0432612	0.303855	0.0589569	0.19403	0.286938	2.75625	0.0452174	601
PCDHA10_ENST00000505235	0.292845	0.688852	0.0183028	0.425121	0.02657	0.0625	0.414118	2.2139	0.0186441	601
MPDZ_ENST00000541718	0.233333	0.701667	0.065	0.332542	0.0926366	0.278571	0.304348	2.35196	0.0695187	600
ERC2	0.258333	0.678333	0.0633333	0.380835	0.0933661	0.245161	0.348315	2.10881	0.0676157	600
PDE3A	0.221667	0.72	0.0583333	0.30787	0.0810185	0.263158	0.284797	2.57143	0.0619469	600
KCNQ3	0.273333	0.678333	0.0483333	0.402948	0.0712531	0.176829	0.376147	2.10881	0.0507881	600
MYOM3	0.305	0.648333	0.0466667	0.470437	0.0719794	0.153005	0.438849	1.8436	0.048951	600
LAMB4_ENST00000388780	0.228333	0.728333	0.0433333	0.313501	0.0594966	0.189781	0.295896	2.68098	0.0452962	600
FGFR2_ENST00000457416	0.121667	0.845	0.0333333	0.143984	0.0394477	0.273973	0.13852	5.45161	0.0344828	600
GRM6	0.356667	0.61	0.0333333	0.584699	0.0546448	0.0934579	0.554404	1.5641	0.0344828	600
INSRR_ENST00000368195	0.286667	0.683333	0.03	0.419512	0.0439024	0.104651	0.401869	2.15789	0.0309278	600
FCRL5	0.246667	0.728333	0.025	0.338673	0.0343249	0.101351	0.327434	2.68098	0.025641	600
KIAA1486	0.288333	0.688333	0.0233333	0.418886	0.0338983	0.0809249	0.405152	2.20856	0.0238908	600
HCFC1	0.308333	0.683333	0.00833333	0.45122	0.0121951	0.027027	0.445783	2.15789	0.00840336	600
ZNF318	0.196995	0.714524	0.0884808	0.275701	0.123832	0.449153	0.245322	2.50292	0.0970696	599
SPTBN1_ENST00000333896	0.27212	0.659432	0.0684474	0.412658	0.103797	0.251534	0.373853	1.93627	0.0734767	599
EGFLAM_ENST00000354891	0.248748	0.704508	0.0467446	0.353081	0.0663507	0.187919	0.331111	2.38418	0.0490368	599
AXL	0.156928	0.81803	0.0250417	0.191837	0.0306122	0.159574	0.186139	4.49541	0.0256849	599
MED13	0.200669	0.737458	0.0618729	0.272109	0.0839002	0.308333	0.251046	2.80892	0.0659537	598
LATS2	0.185619	0.752508	0.0618729	0.246667	0.0822222	0.333333	0.227926	3.04054	0.0659537	598
ERC2_ENST00000288221	0.255853	0.683946	0.0602007	0.374083	0.0880196	0.235294	0.34382	2.16402	0.0640569	598
DROSHA	0.153846	0.787625	0.0585284	0.195329	0.07431	0.380435	0.181818	3.70866	0.062167	598
CDH2	0.247492	0.714047	0.0384615	0.346604	0.0538642	0.155405	0.328889	2.49708	0.04	598
LRRK1_ENST00000284395	0.329431	0.633779	0.0367893	0.519789	0.0580475	0.111675	0.491272	1.73059	0.0381944	598
PRDM16	0.297659	0.683946	0.0183946	0.435208	0.0268949	0.0617978	0.42381	2.16402	0.0187394	598
RGPD3_ENST00000304514	0.164154	0.79732	0.038526	0.205882	0.0483193	0.234694	0.196393	3.93388	0.0400697	597
NAV2_ENST00000540292	0.286432	0.683417	0.0301508	0.419118	0.0441176	0.105263	0.401408	2.15873	0.0310881	597
PCDHGA5_ENST00000518069	0.341709	0.641541	0.0167504	0.532637	0.0261097	0.0490196	0.519084	1.78972	0.0170358	597
CENPE_ENST00000265148	0.176174	0.736577	0.0872483	0.23918	0.118451	0.495238	0.213849	2.79618	0.0955882	596
COL4A3_ENST00000328380	0.187919	0.77349	0.0385906	0.24295	0.0498915	0.205357	0.231405	3.41481	0.0401396	596
FLRT2	0.300336	0.671141	0.0285235	0.4475	0.0425	0.0949721	0.429257	2.04082	0.029361	596
CCDC88C_ENST00000389857	0.300336	0.676174	0.0234899	0.444169	0.0347395	0.0782123	0.429257	2.08808	0.024055	596
LAMB1	0.208403	0.712605	0.0789916	0.292453	0.110849	0.379032	0.26327	2.47953	0.0857664	595
LRP4	0.221849	0.736134	0.0420168	0.30137	0.0570776	0.189394	0.285097	2.78981	0.0438596	595
RGPD3	0.164706	0.796639	0.0386555	0.206751	0.0485232	0.234694	0.197183	3.91736	0.0402098	595
NUP205	0.255892	0.666667	0.0774411	0.383838	0.116162	0.302632	0.343891	2	0.0839416	594
ARAP2	0.215488	0.707071	0.0774411	0.304762	0.109524	0.359375	0.274678	2.41379	0.0839416	594
ADAMTS19	0.198653	0.734007	0.0673401	0.270642	0.0917431	0.338983	0.247899	2.75949	0.0722022	594
DOCK11	0.185185	0.755892	0.0589226	0.244989	0.077951	0.318182	0.227273	3.09655	0.0626118	594
MYOCD_ENST00000425538	0.234007	0.708754	0.0572391	0.330166	0.0807601	0.244604	0.305495	2.43353	0.0607143	594
FSCB	0.175084	0.777778	0.047138	0.225108	0.0606061	0.269231	0.212245	3.5	0.04947	594
PLXNB1	0.247475	0.715488	0.037037	0.345882	0.0517647	0.14966	0.328859	2.51479	0.0384615	594
SBF1	0.286195	0.681818	0.0319865	0.419753	0.0469136	0.111765	0.400943	2.14286	0.0330435	594
OGDHL	0.287879	0.683502	0.0286195	0.421182	0.0418719	0.0994152	0.404255	2.15957	0.0294627	594
KCNT2_ENST00000367431	0.244519	0.674536	0.0809444	0.3625	0.12	0.331034	0.323661	2.07254	0.0880734	593
KCND2	0.252951	0.676223	0.0708263	0.374065	0.104738	0.28	0.3386	2.08854	0.076225	593
PCDHB11	0.284992	0.676223	0.0387858	0.421446	0.0573566	0.136095	0.398585	2.08854	0.0403509	593
PLCL1_ENST00000428675	0.194257	0.738176	0.0675676	0.263158	0.0915332	0.347826	0.24109	2.81935	0.0724638	592
NYNRIN	0.283784	0.660473	0.0557432	0.429668	0.084399	0.196429	0.396226	1.94527	0.059034	592
ABCC1	0.322635	0.635135	0.0422297	0.507979	0.0664894	0.13089	0.476309	1.74074	0.0440917	592
SCRIB	0.261824	0.704392	0.0337838	0.371703	0.0479616	0.129032	0.354691	2.38286	0.034965	592
AFF2_ENST00000286437	0.222973	0.75	0.027027	0.297297	0.036036	0.121212	0.286957	3	0.0277778	592
COL11A2	0.233108	0.741554	0.0253378	0.314351	0.0341686	0.108696	0.303965	2.86928	0.0259965	592
FGD5_ENST00000285046	0.277027	0.704392	0.0185811	0.393285	0.0263789	0.0670732	0.383178	2.38286	0.0189329	592
FHOD3	0.240271	0.703892	0.0558376	0.341346	0.0793269	0.232394	0.316258	2.37714	0.0591398	591
CNTN3	0.255499	0.697124	0.0473773	0.366505	0.0679612	0.18543	0.343182	2.30168	0.0497336	591
NFASC_ENST00000339876	0.240271	0.724196	0.035533	0.331776	0.0490654	0.147887	0.316258	2.62577	0.0368421	591
FRMPD4_ENST00000429478	0.253807	0.712352	0.0338409	0.356295	0.0475059	0.133333	0.340136	2.47647	0.0350263	591
PCDHGA6_ENST00000517434	0.306261	0.659898	0.0338409	0.464103	0.0512821	0.110497	0.441463	1.9403	0.0350263	591
MED13L	0.238579	0.734349	0.0270728	0.324885	0.0368664	0.113475	0.313333	2.76433	0.0278261	591
MLLT4_ENST00000366806	0.238983	0.664407	0.0966102	0.359694	0.145408	0.404255	0.314031	1.9798	0.106942	590
TRIP12	0.218644	0.694915	0.0864407	0.314634	0.12439	0.395349	0.279826	2.27778	0.0946197	590
ATRNL1	0.20678	0.720339	0.0728814	0.287059	0.101176	0.352459	0.260684	2.57576	0.0786106	590
CASC5_ENST00000346991	0.186441	0.740678	0.0728814	0.251716	0.0983982	0.390909	0.229167	2.85621	0.0786106	590
IL7R	0.161017	0.776271	0.0627119	0.207424	0.080786	0.389474	0.191919	3.4697	0.0669078	590
MAGI1_ENST00000402939	0.242373	0.720339	0.0372881	0.336471	0.0517647	0.153846	0.319911	2.57576	0.0387324	590
QRICH2	0.259322	0.713559	0.0271186	0.36342	0.0380048	0.104575	0.350114	2.49112	0.0278746	590
TIE1	0.291525	0.689831	0.0186441	0.422604	0.027027	0.0639535	0.411483	2.22404	0.0189983	590
JMJD1C_ENST00000399262	0.190153	0.747029	0.0628183	0.254545	0.0840909	0.330357	0.234801	2.95302	0.067029	589
FAM123C	0.280136	0.691002	0.0288625	0.405405	0.041769	0.10303	0.389151	2.23626	0.0297203	589
MYO9A_ENST00000424560	0.151361	0.795918	0.0527211	0.190171	0.0662393	0.348315	0.178357	3.9	0.0556553	588
KCNU1	0.260204	0.695578	0.0442177	0.374083	0.0635697	0.169935	0.351724	2.28492	0.0462633	588
PTPRM	0.256803	0.702381	0.0408163	0.365617	0.0581114	0.15894	0.345538	2.36	0.0425532	588
ATP13A5	0.219388	0.739796	0.0408163	0.296552	0.0551724	0.186047	0.281046	2.84314	0.0425532	588
RGPD4_ENST00000354986	0.129252	0.836735	0.0340136	0.154472	0.0406504	0.263158	0.148438	5.125	0.0352113	588
SBF1_ENST00000380817	0.284014	0.685374	0.0306122	0.414392	0.044665	0.107784	0.396675	2.17838	0.0315789	588
INSRR	0.289116	0.681973	0.0289116	0.42394	0.042394	0.1	0.406699	2.14439	0.0297723	588
CHD8_ENST00000430710	0.156729	0.752981	0.0902896	0.208145	0.11991	0.576087	0.185859	3.04828	0.0992509	587
LMO7_ENST00000357063	0.206133	0.72402	0.0698467	0.284706	0.0964706	0.338843	0.259657	2.62346	0.0750916	587
DNAH6_ENST00000398278	0.190801	0.763203	0.0459966	0.25	0.0602679	0.241071	0.235789	3.22302	0.0482143	587
CBLB	0.502555	0.46678	0.0306644	1.07664	0.0656934	0.0610169	1.01027	0.875399	0.0316344	587
SLIT1	0.287905	0.684838	0.0272572	0.420398	0.039801	0.0946746	0.404306	2.17297	0.028021	587
USP29	0.180887	0.745734	0.0733788	0.242563	0.0983982	0.40566	0.220833	2.93289	0.0791897	586
EZH2_ENST00000350995	0.0938567	0.846416	0.059727	0.110887	0.0705645	0.636364	0.103578	5.51111	0.0635209	586
RTTN	0.235495	0.716724	0.0477816	0.328571	0.0666667	0.202899	0.308036	2.53012	0.0501792	586
COL1A1	0.225256	0.749147	0.0255973	0.300683	0.0341686	0.113636	0.290749	2.98639	0.0262697	586
TANC1	0.237607	0.711111	0.0512821	0.334135	0.0721154	0.215827	0.311659	2.46154	0.0540541	585
LILRB1	0.290598	0.668376	0.0410256	0.434783	0.0613811	0.141176	0.409639	2.01546	0.0427807	585
CRB1_ENST00000535699	0.22906	0.731624	0.0393162	0.313084	0.0537383	0.171642	0.297118	2.72611	0.0409253	585
HJURP	0.150427	0.820513	0.0290598	0.183333	0.0354167	0.193182	0.177062	4.57143	0.0299296	585
PCDHB2	0.348718	0.630769	0.0205128	0.552846	0.0325203	0.0588235	0.535433	1.70833	0.0209424	585
USP9X_ENST00000324545	0.188356	0.708904	0.10274	0.2657	0.144928	0.545455	0.232068	2.43529	0.114504	584
INADL	0.203767	0.726027	0.0702055	0.28066	0.0966981	0.344538	0.255914	2.65	0.0755064	584
FAM5B	0.27226	0.691781	0.0359589	0.393564	0.0519802	0.132075	0.374118	2.24444	0.0373002	584
FAT4_ENST00000335110	0.256849	0.708904	0.0342466	0.362319	0.0483092	0.133333	0.345622	2.43529	0.035461	584
MYO18A_ENST00000527372	0.263699	0.707192	0.0291096	0.372881	0.0411622	0.11039	0.35814	2.4152	0.0299824	584
DOCK1	0.277397	0.700342	0.0222603	0.396088	0.0317848	0.0802469	0.383886	2.33714	0.0227671	584
RAI1	0.307033	0.64494	0.0480274	0.476064	0.0744681	0.156425	0.443069	1.81643	0.0504505	583
KIAA2018	0.229846	0.722127	0.0480274	0.31829	0.0665083	0.208955	0.298441	2.59877	0.0504505	583
AUTS2	0.269297	0.701544	0.0291595	0.383863	0.0415648	0.10828	0.368545	2.35057	0.0300353	583
NPC1L1	0.288165	0.686106	0.025729	0.42	0.0375	0.0892857	0.404819	2.18579	0.0264085	583
HEATR5B	0.206186	0.738832	0.0549828	0.27907	0.0744186	0.266667	0.25974	2.82895	0.0581818	582
TANC2	0.195876	0.752577	0.0515464	0.260274	0.0684932	0.263158	0.24359	3.04167	0.0543478	582
KIAA1210	0.204467	0.756014	0.0395189	0.270455	0.0522727	0.193277	0.257019	3.09859	0.0411449	582
SCN8A_ENST00000354534	0.257732	0.706186	0.0360825	0.364964	0.0510949	0.14	0.347222	2.40351	0.0374332	582
FGFR2_ENST00000351936	0.123711	0.845361	0.0309278	0.146341	0.0365854	0.25	0.141176	5.46667	0.0319149	582
TET3	0.388316	0.584192	0.0274914	0.664706	0.0470588	0.0707965	0.634831	1.40496	0.0282686	582
POLD1_ENST00000440232	0.219931	0.761168	0.0189003	0.288939	0.0248307	0.0859375	0.281938	3.18705	0.0192644	582
PRR12_ENST00000418929	0.273196	0.707904	0.0189003	0.385922	0.026699	0.0691824	0.375887	2.42353	0.0192644	582
TP53BP1	0.173838	0.72117	0.104991	0.24105	0.145585	0.60396	0.210417	2.58642	0.117308	581
NES	0.232358	0.712565	0.0550775	0.326087	0.0772947	0.237037	0.302691	2.47904	0.0582878	581
COL4A6_ENST00000394872	0.20654	0.740103	0.0533563	0.27907	0.072093	0.258333	0.260304	2.84768	0.0563636	581
ABCA9	0.225862	0.710345	0.0637931	0.317961	0.0898058	0.282443	0.291759	2.45238	0.06814	580
GOLGA3	0.296552	0.672414	0.0310345	0.441026	0.0461538	0.104651	0.421569	2.05263	0.0320285	580
RASGRF1	0.3	0.672414	0.0275862	0.446154	0.0410256	0.091954	0.428571	2.05263	0.0283688	580
PCDHGA5	0.35	0.631034	0.0189655	0.554645	0.0300546	0.0541872	0.538462	1.71028	0.0193322	580
BCL2	0.291379	0.703448	0.00517241	0.414216	0.00735294	0.0177515	0.411192	2.37209	0.00519931	580
ARHGAP5	0.250432	0.661485	0.0880829	0.37859	0.133159	0.351724	0.334101	1.95408	0.0965909	579
GRM1_ENST00000392299	0.271157	0.680484	0.0483592	0.398477	0.071066	0.178344	0.372038	2.12973	0.0508167	579
LPHN2_ENST00000370721	0.207254	0.751295	0.0414508	0.275862	0.0551724	0.2	0.261438	3.02083	0.0432432	579
PCDHAC1	0.286701	0.680484	0.0328152	0.42132	0.0482234	0.114458	0.401937	2.12973	0.0339286	579
PDE1C_ENST00000396191	0.237024	0.704152	0.0588235	0.336609	0.0835381	0.248175	0.310658	2.38012	0.0625	578
PDZRN4	0.221453	0.719723	0.0588235	0.307692	0.0817308	0.265625	0.284444	2.5679	0.0625	578
COL2A1	0.190311	0.752595	0.0570934	0.252874	0.0758621	0.3	0.235043	3.04196	0.0605505	578
MYOM1	0.262976	0.681661	0.0553633	0.385787	0.0812183	0.210526	0.356808	2.1413	0.0586081	578
MYO10_ENST00000513610	0.299308	0.653979	0.0467128	0.457672	0.0714286	0.156069	0.42716	1.89	0.0490018	578
PHF3	0.209705	0.72617	0.0641248	0.288783	0.0883055	0.305785	0.265351	2.6519	0.0685185	577
MAP2K3	0.27383	0.677643	0.0485269	0.404092	0.0716113	0.177215	0.377088	2.10215	0.0510018	577
ESPL1	0.270833	0.696181	0.0329861	0.389027	0.0473815	0.121795	0.371429	2.29143	0.0341113	576
PLXNB3	0.258681	0.708333	0.0329861	0.365196	0.0465686	0.127517	0.348946	2.42857	0.0341113	576
NLRP12_ENST00000345770	0.322917	0.649306	0.0277778	0.497326	0.0427807	0.0860215	0.476923	1.85149	0.0285714	576
ADCY5	0.328696	0.631304	0.04	0.520661	0.0633609	0.121693	0.489637	1.71226	0.0416667	575
MECOM_ENST00000264674	0.248696	0.725217	0.026087	0.342926	0.0359712	0.104895	0.331019	2.63924	0.0267857	575
DGKI_ENST00000288490	0.238676	0.688153	0.0731707	0.346835	0.106329	0.306569	0.313501	2.2067	0.0789474	574
HEPH	0.235192	0.712544	0.0522648	0.330073	0.0733496	0.222222	0.307517	2.47879	0.0551471	574
PLB1	0.275261	0.684669	0.0400697	0.402036	0.0585242	0.14557	0.379808	2.17127	0.0417423	574
UMODL1_ENST00000408989	0.283972	0.681185	0.0348432	0.41688	0.0511509	0.122699	0.396594	2.13661	0.0361011	574
SCRIB_ENST00000356994	0.259582	0.707317	0.033101	0.366995	0.046798	0.127517	0.350588	2.41667	0.0342342	574
PTPRU	0.235192	0.743902	0.0209059	0.316159	0.028103	0.0888889	0.307517	2.90476	0.0213523	574
RBMXL3	0.324042	0.660279	0.0156794	0.490765	0.0237467	0.0483871	0.479381	1.94359	0.0159292	574
NELL1	0.226876	0.710297	0.0628272	0.31941	0.0884521	0.276923	0.293454	2.45181	0.0670391	573
DNAJC13_ENST00000260818	0.21815	0.720768	0.061082	0.302663	0.0847458	0.28	0.279018	2.58125	0.0650558	573
ANKS1B	0.228621	0.719023	0.052356	0.317961	0.0728155	0.229008	0.29638	2.55901	0.0552486	573
PI4KA_ENST00000255882	0.30192	0.65096	0.0471204	0.463807	0.0723861	0.156069	0.4325	1.865	0.0494505	573
CCNB3	0.21466	0.753927	0.0314136	0.284722	0.0416667	0.146341	0.273333	3.06383	0.0324324	573
SHANK2_ENST00000423696	0.296684	0.682373	0.0209424	0.434783	0.0306905	0.0705882	0.421836	2.14835	0.0213904	573
PRKCB_ENST00000303531	0.235602	0.745201	0.0191972	0.316159	0.0257611	0.0814815	0.308219	2.92466	0.019573	573
WDR90	0.310646	0.677138	0.0122164	0.458763	0.0180412	0.0393258	0.450633	2.0973	0.0123675	573
KCNH8	0.20979	0.746503	0.0437063	0.28103	0.058548	0.208333	0.265487	2.94483	0.0457038	572
MPDZ_ENST00000319217	0.243433	0.69352	0.0630473	0.35101	0.0909091	0.258993	0.321759	2.26286	0.0672897	571
CNTN1	0.225919	0.714536	0.0595447	0.316176	0.0833333	0.263566	0.291855	2.50307	0.0633147	571
ARFGEF2	0.222417	0.730298	0.0472855	0.304556	0.0647482	0.212598	0.286036	2.70779	0.0496324	571
KCNU1_ENST00000399881	0.255692	0.700525	0.0437828	0.365	0.0625	0.171233	0.343529	2.33918	0.0457875	571
NFASC	0.246935	0.712785	0.0402802	0.346437	0.0565111	0.163121	0.327907	2.48171	0.0419708	571
RPTN	0.215412	0.751313	0.033275	0.286713	0.044289	0.154472	0.274554	3.02113	0.0344203	571
EPHA8	0.34676	0.621716	0.0315236	0.557746	0.0507042	0.0909091	0.530831	1.64352	0.0325497	571
ATXN1	0.220665	0.753065	0.0262697	0.293023	0.0348837	0.119048	0.283146	3.04965	0.0269784	571
KSR2_ENST00000339824	0.322242	0.65324	0.0245184	0.493298	0.0375335	0.076087	0.475452	1.88384	0.0251346	571
PCDHGB3	0.295972	0.681261	0.0227671	0.434447	0.033419	0.0769231	0.420398	2.13736	0.0232975	571
PCDHGB3_ENST00000576222	0.295972	0.681261	0.0227671	0.434447	0.033419	0.0769231	0.420398	2.13736	0.0232975	571
LATS2_ENST00000382592	0.180702	0.764912	0.054386	0.236239	0.0711009	0.300971	0.220557	3.25373	0.0575139	570
SETD1A	0.266667	0.694737	0.0385965	0.383838	0.0555556	0.144737	0.363636	2.27586	0.040146	570
NLGN4X	0.287719	0.682456	0.0298246	0.421594	0.0437018	0.103659	0.403941	2.14917	0.0307414	570
CTBP2	0.25614	0.72807	0.0157895	0.351807	0.0216867	0.0616438	0.34434	2.67742	0.0160428	570
KCNH1	0.256591	0.70123	0.0421793	0.365915	0.0601504	0.164384	0.345154	2.34706	0.0440367	569
PCDHGA3	0.341549	0.625	0.0334507	0.546479	0.0535211	0.0979381	0.518717	1.66667	0.0346084	568
PRX	0.274648	0.695423	0.0299296	0.394937	0.043038	0.108974	0.378641	2.28324	0.030853	568
PTPRU_ENST00000356870	0.227113	0.75	0.0228873	0.302817	0.0305164	0.100775	0.29385	3	0.0234234	568
ZC3H13	0.146384	0.728395	0.12522	0.200969	0.171913	0.855422	0.171488	2.68182	0.143145	567
CHD3	0.190476	0.756614	0.0529101	0.251748	0.0699301	0.277778	0.235294	3.1087	0.0558659	567
NLRP1	0.238095	0.708995	0.0529101	0.335821	0.0746269	0.222222	0.3125	2.43636	0.0558659	567
RALGAPA2	0.280423	0.671958	0.047619	0.417323	0.0708661	0.169811	0.389706	2.04839	0.05	567
KIAA0556	0.275132	0.68254	0.042328	0.403101	0.0620155	0.153846	0.379562	2.15	0.0441989	567
DCAF4L2	0.24515	0.72134	0.0335097	0.339853	0.0464548	0.136691	0.324766	2.58861	0.0346715	567
JMJD1C	0.187279	0.750883	0.0618375	0.249412	0.0823529	0.330189	0.230435	3.01418	0.0659134	566
CACNA2D3	0.303887	0.637809	0.0583039	0.476454	0.0914127	0.19186	0.436548	1.76098	0.0619137	566
SPG11	0.256637	0.676106	0.0672566	0.379581	0.0994764	0.262069	0.345238	2.08743	0.0721063	565
CACNA2D1	0.187611	0.755752	0.0566372	0.248244	0.0749415	0.301887	0.230937	3.0942	0.0600375	565
PRRC2A	0.226549	0.718584	0.0548673	0.315271	0.0763547	0.242188	0.292906	2.55346	0.0580524	565
PTPRK_ENST00000368213	0.217699	0.730973	0.0513274	0.297821	0.0702179	0.235772	0.278281	2.71711	0.0541045	565
PCDH11X_ENST00000298274	0.219469	0.730973	0.0495575	0.300242	0.0677966	0.225806	0.281179	2.71711	0.0521415	565
TANC2_ENST00000389520	0.19469	0.755752	0.0495575	0.257611	0.0655738	0.254545	0.241758	3.0942	0.0521415	565
FGFR1	0.155752	0.815929	0.0283186	0.190889	0.0347072	0.181818	0.184486	4.43269	0.0291439	565
TULP4	0.290265	0.686726	0.0230088	0.42268	0.0335052	0.0792683	0.408978	2.19209	0.0235507	565
COL20A1	0.315044	0.663717	0.0212389	0.474667	0.032	0.0674157	0.459948	1.97368	0.0216998	565
AHCTF1	0.184397	0.714539	0.101064	0.258065	0.141439	0.548077	0.226087	2.50311	0.112426	564
ATP8B4	0.242908	0.696809	0.0602837	0.348601	0.086514	0.248175	0.320843	2.29825	0.0641509	564
ITGB4_ENST00000339591	0.287234	0.675532	0.037234	0.425197	0.0551181	0.12963	0.402985	2.08197	0.038674	564
UNC5C	0.253546	0.718085	0.0283688	0.353086	0.0395062	0.111888	0.339667	2.54717	0.0291971	564
SLITRK2	0.246892	0.699822	0.053286	0.352792	0.0761421	0.215827	0.32783	2.33136	0.0562852	563
MYO18A	0.264654	0.706927	0.0284192	0.374372	0.040201	0.107383	0.359903	2.41212	0.0292505	563
CDHR2	0.280639	0.694494	0.0248668	0.404092	0.0358056	0.0886076	0.390123	2.27326	0.0255009	563
NTRK3_ENST00000317501	0.209591	0.769094	0.0213144	0.272517	0.0277136	0.101695	0.265169	3.33077	0.0217786	563
GON4L_ENST00000368331	0.247331	0.676157	0.0765125	0.365789	0.113158	0.309353	0.328605	2.08791	0.0828516	562
DDR2	0.179715	0.761566	0.0587189	0.235981	0.0771028	0.326733	0.219089	3.19403	0.0623819	562
PCDH11X_ENST00000395337	0.224199	0.745552	0.0302491	0.300716	0.0405728	0.134921	0.288991	2.93007	0.0311927	562
GRLF1_ENST00000317082	0.180036	0.661319	0.158645	0.272237	0.239892	0.881188	0.219565	1.95263	0.188559	561
COBL_ENST00000395542	0.272727	0.641711	0.0855615	0.425	0.133333	0.313725	0.375	1.79104	0.0935673	561
CEP250	0.192513	0.736185	0.0713012	0.261501	0.0968523	0.37037	0.238411	2.79054	0.0767754	561
FGA	0.178253	0.757576	0.0641711	0.235294	0.0847059	0.36	0.21692	3.125	0.0685714	561
C10orf18	0.196078	0.745098	0.0588235	0.263158	0.0789474	0.3	0.243902	2.92308	0.0625	561
KIAA0556_ENST00000261588	0.272727	0.684492	0.0427807	0.398438	0.0625	0.156863	0.375	2.16949	0.0446927	561
MYH10	0.208556	0.754011	0.0374332	0.276596	0.0496454	0.179487	0.263514	3.06522	0.0388889	561
FLNB_ENST00000357272	0.315508	0.655971	0.0285205	0.480978	0.0434783	0.0903955	0.460938	1.90674	0.0293578	561
OTOF_ENST00000361394	0.267857	0.6875	0.0446429	0.38961	0.0649351	0.166667	0.365854	2.2	0.046729	560
CEP192	0.198214	0.764286	0.0375	0.259346	0.0490654	0.189189	0.247216	3.24242	0.038961	560
FAM47B	0.2375	0.725	0.0375	0.327586	0.0517241	0.157895	0.311475	2.63636	0.038961	560
ENSG00000254809	0.317857	0.6625	0.0196429	0.479784	0.0296496	0.0617978	0.465969	1.96296	0.0200364	560
NEFH	0.446429	0.542857	0.0107143	0.822368	0.0197368	0.024	0.806452	1.1875	0.0108303	560
MMP16	0.211091	0.717352	0.0715564	0.294264	0.0997506	0.338983	0.267574	2.53797	0.0770713	559
TRPA1_ENST00000262209	0.191413	0.749553	0.059034	0.25537	0.0787589	0.308411	0.236726	2.99286	0.0627376	559
ALPK2	0.205725	0.742397	0.0518784	0.277108	0.0698795	0.252174	0.259009	2.88194	0.054717	559
NRG3	0.22898	0.726297	0.0447227	0.315271	0.0615764	0.195312	0.296984	2.65359	0.0468165	559
DCLK1	0.261181	0.695886	0.0429338	0.375321	0.0616967	0.164384	0.353511	2.28824	0.0448598	559
WNK2_ENST00000427277	0.286225	0.692308	0.0214669	0.413437	0.0310078	0.075	0.401003	2.25	0.0219378	559
TRPC7	0.318426	0.661896	0.019678	0.481081	0.0297297	0.0617978	0.467192	1.95767	0.020073	559
TGFBR2_ENST00000359013	0.121864	0.790323	0.0878136	0.154195	0.111111	0.720588	0.138776	3.76923	0.0962672	558
WNK3	0.164875	0.763441	0.0716846	0.215962	0.0938967	0.434783	0.197425	3.22727	0.0772201	558
EML5	0.172043	0.759857	0.0681004	0.226415	0.0896226	0.395833	0.207792	3.16418	0.0730769	558
GRM7_ENST00000357716	0.326165	0.616487	0.0573477	0.52907	0.0930233	0.175824	0.484043	1.60748	0.0608365	558
MYOF_ENST00000371501	0.213262	0.732975	0.0537634	0.290954	0.0733496	0.252101	0.271071	2.74497	0.0568182	558
RALGAPA2_ENST00000202677	0.281362	0.670251	0.0483871	0.419786	0.0721925	0.171975	0.391521	2.03261	0.0508475	558
SLC8A3	0.327957	0.630824	0.0412186	0.519886	0.0653409	0.125683	0.488	1.70874	0.0429907	558
ALPK3_ENST00000258888	0.283154	0.68638	0.0304659	0.412533	0.0443864	0.107595	0.395	2.18857	0.0314233	558
BCL2_ENST00000398117	0.302867	0.691756	0.00537634	0.437824	0.00777202	0.0177515	0.434447	2.24419	0.00540541	558
CASC5	0.186715	0.741472	0.0718133	0.251816	0.0968523	0.384615	0.229581	2.86806	0.0773694	557
LAMB2	0.260323	0.691203	0.048474	0.376623	0.0701299	0.186207	0.351942	2.23837	0.0509434	557
CSF1R_ENST00000286301	0.244165	0.709156	0.0466786	0.344304	0.0658228	0.191176	0.32304	2.43827	0.0489642	557
ADCY9	0.337522	0.639138	0.0233393	0.52809	0.0365169	0.0691489	0.509485	1.77114	0.0238971	557
ARHGAP31	0.267986	0.683453	0.0485612	0.392105	0.0710526	0.181208	0.366093	2.15909	0.0510397	556
NCAN_ENST00000539499	0.267986	0.690647	0.0413669	0.388021	0.0598958	0.154362	0.366093	2.23256	0.043152	556
SEMA5B_ENST00000451055	0.343525	0.615108	0.0413669	0.55848	0.0672515	0.120419	0.523288	1.59813	0.043152	556
ADAMTS10	0.264388	0.703237	0.0323741	0.375959	0.0460358	0.122449	0.359413	2.3697	0.0334572	556
DOCK6	0.294964	0.676259	0.028777	0.43617	0.0425532	0.097561	0.418367	2.08889	0.0296296	556
ATP1A2	0.276978	0.69964	0.0233813	0.395887	0.033419	0.0844156	0.383085	2.32934	0.0239411	556
PLXNC1	0.257658	0.668468	0.0738739	0.385445	0.110512	0.286713	0.347087	2.0163	0.0797665	555
GON4L_ENST00000437809	0.245045	0.681081	0.0738739	0.359788	0.108466	0.301471	0.324582	2.13559	0.0797665	555
ARID5B	0.205405	0.731532	0.0630631	0.280788	0.0862069	0.307018	0.258503	2.72483	0.0673077	555
SMARCA2_ENST00000349721	0.234234	0.724324	0.0414414	0.323383	0.0572139	0.176923	0.305882	2.62745	0.0432331	555
GRIK3_ENST00000373093	0.277477	0.686486	0.036036	0.404199	0.0524934	0.12987	0.38404	2.18966	0.0373832	555
ZNF845	0.259459	0.713514	0.027027	0.363636	0.0378788	0.104167	0.350365	2.49057	0.0277778	555
DLEC1	0.318919	0.657658	0.0234234	0.484932	0.0356164	0.0734463	0.468254	1.92105	0.0239852	555
MEN1	0.119134	0.629964	0.250903	0.189112	0.398281	2.10606	0.135246	1.70244	0.33494	554
CASP8	0.066787	0.700361	0.232852	0.0953608	0.332474	3.48649	0.0715667	2.33735	0.303529	554
LATS1_ENST00000253339	0.0938628	0.759928	0.146209	0.123515	0.192399	1.55769	0.103586	3.16541	0.171247	554
YLPM1	0.202166	0.66426	0.133574	0.304348	0.201087	0.660714	0.253394	1.97849	0.154167	554
ZNF646	0.247292	0.716606	0.0361011	0.345088	0.0503778	0.145985	0.328537	2.52866	0.0374532	554
ST6GAL2	0.254513	0.716606	0.0288809	0.355164	0.0403023	0.113475	0.341404	2.52866	0.0297398	554
ITSN1	0.23689	0.685353	0.0777577	0.345646	0.113456	0.328244	0.310427	2.17816	0.0843137	553
GRM7_ENST00000403881	0.325497	0.616637	0.0578662	0.527859	0.0938416	0.177778	0.482574	1.60849	0.0614203	553
NCAN	0.262206	0.696203	0.0415913	0.376623	0.0597403	0.158621	0.355392	2.29167	0.0433962	553
MYOF_ENST00000371502	0.213768	0.733696	0.0525362	0.291358	0.0716049	0.245763	0.271889	2.7551	0.0554493	552
MAST4_ENST00000405643	0.273551	0.682971	0.0434783	0.400531	0.0636605	0.15894	0.376559	2.15429	0.0454545	552
NCOA3	0.293478	0.664855	0.0416667	0.441417	0.0626703	0.141975	0.415385	1.98378	0.0434783	552
OR9G1	0.179348	0.802536	0.0181159	0.223476	0.0225734	0.10101	0.218543	4.06422	0.0184502	552
PRKCB_ENST00000321728	0.244565	0.737319	0.0181159	0.331695	0.02457	0.0740741	0.323741	2.8069	0.0184502	552
NBEAL1_ENST00000449802	0.186933	0.722323	0.0907441	0.258794	0.125628	0.485437	0.229911	2.60131	0.0998004	551
DOCK5	0.217786	0.724138	0.0580762	0.300752	0.0802005	0.266667	0.278422	2.625	0.061657	551
OTOF_ENST00000402415	0.270417	0.684211	0.0453721	0.395225	0.066313	0.167785	0.370647	2.16667	0.0475285	551
MYO3B	0.281307	0.680581	0.0381125	0.413333	0.056	0.135484	0.391414	2.13068	0.0396226	551
PRDM2	0.254083	0.707804	0.0381125	0.358974	0.0538462	0.15	0.340633	2.42236	0.0396226	551
C2CD3_ENST00000334126	0.23412	0.729583	0.0362976	0.320896	0.0497512	0.155039	0.305687	2.69799	0.0376648	551
PRKCB	0.243194	0.738657	0.0181488	0.329238	0.02457	0.0746269	0.321343	2.82639	0.0184843	551
KIAA1529	0.310909	0.632727	0.0563636	0.491379	0.0890805	0.181287	0.451187	1.72277	0.0597303	550
SEMA5B	0.329091	0.630909	0.04	0.521614	0.0634006	0.121547	0.490515	1.70936	0.0416667	550
BNC2	0.238182	0.729091	0.0327273	0.326683	0.0448878	0.137405	0.312649	2.69128	0.0338346	550
NINL	0.241818	0.730909	0.0272727	0.330846	0.0373134	0.112782	0.318945	2.71622	0.0280374	550
ANKHD1-EIF4EBP3	0.196721	0.757741	0.0455373	0.259615	0.0600962	0.231481	0.244898	3.12782	0.0477099	549
SLC8A1_ENST00000406785	0.265938	0.692168	0.0418944	0.384211	0.0605263	0.157534	0.362283	2.24852	0.0437262	549
PIK3C2B	0.26776	0.697632	0.0346084	0.383812	0.0496084	0.129252	0.365672	2.30723	0.0358491	549
ABCA10	0.19708	0.709854	0.0930657	0.277635	0.131105	0.472222	0.245455	2.44654	0.102616	548
ARSD	0.114964	0.819343	0.0656934	0.140312	0.0801782	0.571429	0.129897	4.53535	0.0703125	548
PI4KA	0.270073	0.682482	0.0474453	0.395722	0.0695187	0.175676	0.37	2.14943	0.0498084	548
NLRP11	0.275547	0.682482	0.0419708	0.403743	0.0614973	0.152318	0.380353	2.14943	0.0438095	548
SMARCA2	0.237226	0.722628	0.040146	0.328283	0.0555556	0.169231	0.311005	2.60526	0.0418251	548
AQP7_ENST00000379503	0.171533	0.822993	0.00547445	0.208426	0.00665188	0.0319149	0.207048	4.64948	0.00550459	548
MYO5A	0.184644	0.736746	0.0786106	0.25062	0.1067	0.425743	0.226457	2.79861	0.0853175	547
MYO5C	0.250457	0.672761	0.0767824	0.372283	0.11413	0.306569	0.334146	2.05587	0.0831683	547
PGR	0.204753	0.723949	0.071298	0.282828	0.0984848	0.348214	0.257471	2.62252	0.0767717	547
DEPDC5	0.232176	0.698355	0.0694698	0.332461	0.0994764	0.299213	0.302381	2.31515	0.0746562	547
CDK5RAP2	0.202925	0.731261	0.0658135	0.2775	0.09	0.324324	0.254587	2.72109	0.0704501	547
COL3A1_ENST00000317840	0.184644	0.755027	0.0603291	0.244552	0.0799031	0.326733	0.226457	3.08209	0.0642023	547
PRSS3_ENST00000429677	0.170018	0.826325	0.00365631	0.205752	0.00442478	0.0215054	0.204846	4.75789	0.00366972	547
NLRP14_ENST00000299481	0.234432	0.699634	0.0659341	0.335079	0.0942408	0.28125	0.30622	2.32927	0.0705882	546
YSK4_ENST00000375845	0.230769	0.721612	0.047619	0.319797	0.0659898	0.206349	0.3	2.59211	0.05	546
DCLK1_ENST00000255448	0.265568	0.690476	0.043956	0.384615	0.0636605	0.165517	0.361596	2.23077	0.045977	546
SLC8A1_ENST00000542024	0.267399	0.690476	0.0421245	0.387268	0.061008	0.157534	0.365	2.23077	0.0439771	546
LTBP1_ENST00000407925	0.278388	0.68315	0.0384615	0.407507	0.0563003	0.138158	0.385787	2.15607	0.04	546
FGFR2_ENST00000357555	0.148352	0.818681	0.032967	0.181208	0.0402685	0.222222	0.174194	4.51515	0.0340909	546
AKAP12	0.298535	0.67033	0.0311355	0.445355	0.0464481	0.104294	0.425587	2.03333	0.0321361	546
ABCC3	0.28022	0.697802	0.021978	0.401575	0.0314961	0.0784314	0.389313	2.30909	0.0224719	546
PCDHGA8	0.320513	0.664835	0.014652	0.482094	0.0220386	0.0457143	0.471698	1.98361	0.0148699	546
LATS1_ENST00000543571	0.0954128	0.755963	0.148624	0.126214	0.196602	1.55769	0.105477	3.09774	0.174569	545
KLHL1	0.205505	0.724771	0.0697248	0.283544	0.0962025	0.339286	0.258661	2.63333	0.0749507	545
NIN_ENST00000453196	0.227523	0.710092	0.0623853	0.320413	0.0878553	0.274194	0.294537	2.44937	0.0665362	545
KDM3B	0.251376	0.688073	0.0605505	0.365333	0.088	0.240876	0.335784	2.20588	0.0644531	545
TAF1_ENST00000276072	0.122936	0.836697	0.040367	0.14693	0.0482456	0.328358	0.140167	5.1236	0.042065	545
HCN4	0.26789	0.706422	0.0256881	0.379221	0.0363636	0.0958904	0.365915	2.40625	0.0263653	545
HLA-DQB1	0.209174	0.785321	0.00550459	0.266355	0.00700935	0.0263158	0.264501	3.65812	0.00553506	545
WT1_ENST00000332351	0.295956	0.564338	0.139706	0.52443	0.247557	0.47205	0.420366	1.29536	0.162393	544
FSIP2	0.172794	0.764706	0.0625	0.225962	0.0817308	0.361702	0.208889	3.25	0.0666667	544
DDR2_ENST00000367922	0.198529	0.744485	0.0569853	0.266667	0.0765432	0.287037	0.247706	2.91367	0.0604288	544
MYPN	0.242647	0.709559	0.0477941	0.341969	0.0673575	0.19697	0.320388	2.44304	0.0501931	544
SHROOM2	0.262868	0.696691	0.0404412	0.377309	0.0580475	0.153846	0.356608	2.29697	0.0421456	544
PLXNB3_ENST00000538966	0.262868	0.705882	0.03125	0.372396	0.0442708	0.118881	0.356608	2.4	0.0322581	544
ATP10D	0.220588	0.75	0.0294118	0.294118	0.0392157	0.133333	0.283019	3	0.030303	544
ADAMTS14	0.239411	0.720074	0.0405157	0.332481	0.056266	0.169231	0.31477	2.57237	0.0422265	543
PCDH11X_ENST00000504220	0.222836	0.740331	0.0368324	0.300995	0.0497512	0.165289	0.28673	2.85106	0.0382409	543
PCDH7	0.303867	0.661142	0.0349908	0.45961	0.0529248	0.115152	0.436508	1.95109	0.0362595	543
ATP2B3_ENST00000349466	0.327808	0.646409	0.0257827	0.507123	0.039886	0.0786517	0.487671	1.82812	0.026465	543
XRCC1	0.366483	0.622468	0.0110497	0.588757	0.0177515	0.0301508	0.578488	1.64878	0.0111732	543
SYCP2	0.164207	0.743542	0.0922509	0.220844	0.124069	0.561798	0.196468	2.89928	0.101626	542
LIFR_ENST00000263409	0.162362	0.767528	0.0701107	0.211538	0.0913462	0.431818	0.193833	3.30159	0.0753968	542
CNGB3	0.180812	0.752768	0.0664207	0.240196	0.0882353	0.367347	0.220721	3.04478	0.0711462	542
ANKHD1	0.195572	0.758303	0.0461255	0.257908	0.0608273	0.235849	0.243119	3.1374	0.0483559	542
OCA2	0.280443	0.680812	0.0387454	0.411924	0.0569106	0.138158	0.389744	2.13295	0.0403071	542
IRS2	0.182657	0.808118	0.00922509	0.226027	0.0114155	0.0505051	0.223476	4.21154	0.00931099	542
EIF4G1	0.221811	0.704251	0.0739372	0.314961	0.104987	0.333333	0.285036	2.38125	0.0798403	541
DMXL1_ENST00000539542	0.216266	0.711645	0.0720887	0.303896	0.101299	0.333333	0.275943	2.46795	0.0776892	541
FSIP2_ENST00000343098	0.173752	0.76525	0.0609982	0.227053	0.0797101	0.351064	0.210291	3.25984	0.0649606	541
PDE1C_ENST00000396193	0.238447	0.700555	0.0609982	0.340369	0.0870712	0.255814	0.313107	2.33951	0.0649606	541
ZNF638	0.182994	0.756007	0.0609982	0.242054	0.0806846	0.333333	0.223982	3.09848	0.0649606	541
PDE1C	0.238447	0.704251	0.0573013	0.338583	0.0813648	0.24031	0.313107	2.38125	0.0607843	541
PLCB4_ENST00000378473	0.212569	0.733826	0.0536044	0.289673	0.0730479	0.252174	0.269953	2.75694	0.0566406	541
ANO2	0.269871	0.68207	0.0480591	0.395664	0.0704607	0.178082	0.36962	2.14535	0.0504854	541
SFMBT2	0.28281	0.672828	0.0443623	0.42033	0.0659341	0.156863	0.39433	2.0565	0.0464217	541
DLEC1_ENST00000346219	0.312384	0.663586	0.0240296	0.470752	0.0362117	0.0769231	0.454301	1.97253	0.0246212	541
OR2T33	0.19963	0.783734	0.0166359	0.254717	0.0212264	0.0833333	0.249423	3.62393	0.0169173	541
PRDM1	0.190741	0.753704	0.0555556	0.253071	0.0737101	0.291262	0.235698	3.06015	0.0588235	540
MMRN1	0.166667	0.787037	0.0462963	0.211765	0.0588235	0.277778	0.2	3.69565	0.0485437	540
KIAA0100_ENST00000528896	0.251852	0.705556	0.0425926	0.356955	0.0603675	0.169118	0.336634	2.39623	0.0444874	540
ITGAD	0.261111	0.711111	0.0277778	0.367188	0.0390625	0.106383	0.353383	2.46154	0.0285714	540
KDM5C_ENST00000452825	0.131725	0.760668	0.107607	0.173171	0.141463	0.816901	0.151709	3.17829	0.120582	539
DOCK7	0.205937	0.727273	0.0667904	0.283163	0.0918367	0.324324	0.259346	2.66667	0.0715706	539
DSEL	0.205937	0.742115	0.0519481	0.2775	0.07	0.252252	0.259346	2.8777	0.0547945	539
DCAF12L2	0.257885	0.71243	0.0296846	0.361979	0.0416667	0.115108	0.3475	2.47742	0.0305927	539
LRP6	0.276952	0.674721	0.0483271	0.410468	0.0716253	0.174497	0.383033	2.07429	0.0507813	538
FRMPD2	0.232342	0.732342	0.035316	0.317259	0.0482234	0.152	0.302663	2.73611	0.0366089	538
BCL11A	0.360595	0.626394	0.0130112	0.575668	0.0207715	0.0360825	0.563953	1.67662	0.0131827	538
OR2T8	0.124535	0.86803	0.00743494	0.143469	0.00856531	0.0597015	0.142251	6.57746	0.00749064	538
NFATC1	0.283054	0.703911	0.0130354	0.402116	0.0185185	0.0460526	0.394805	2.37736	0.0132075	537
TNIK	0.227612	0.690299	0.0820896	0.32973	0.118919	0.360656	0.294686	2.22892	0.0894309	536
ERCC6	0.253731	0.673507	0.0727612	0.376731	0.108033	0.286765	0.34	2.06286	0.0784708	536
PRAMEF2	0.23694	0.714552	0.0485075	0.331593	0.0678851	0.204724	0.310513	2.50327	0.0509804	536
XIRP2_ENST00000409728	0.233209	0.720149	0.0466418	0.323834	0.0647668	0.2	0.304136	2.57333	0.0489237	536
NCKAP1L	0.25	0.710821	0.0391791	0.351706	0.0551181	0.156716	0.333333	2.45806	0.0407767	536
SIM1	0.287313	0.682836	0.0298507	0.420765	0.0437158	0.103896	0.403141	2.15294	0.0307692	536
LAMB3	0.268657	0.703358	0.0279851	0.381963	0.0397878	0.104167	0.367347	2.37107	0.0287908	536
PTPRU_ENST00000460170	0.227612	0.75	0.0223881	0.303483	0.0298507	0.0983607	0.294686	3	0.0229008	536
NBEAL2	0.276119	0.708955	0.0149254	0.389474	0.0210526	0.0540541	0.381443	2.4359	0.0151515	536
GRLF1	0.179439	0.661682	0.158879	0.271186	0.240113	0.885417	0.218679	1.9558	0.188889	535
BRWD1_ENST00000333229	0.175701	0.760748	0.0635514	0.230958	0.0835381	0.361702	0.213152	3.17969	0.0678643	535
ATP13A4	0.242991	0.71028	0.046729	0.342105	0.0657895	0.192308	0.320988	2.45161	0.0490196	535
MAST4_ENST00000403666	0.274766	0.680374	0.0448598	0.403846	0.0659341	0.163265	0.378866	2.12865	0.0469667	535
KCNMA1_ENST00000406533	0.263551	0.693458	0.0429907	0.380054	0.0619946	0.163121	0.357868	2.2622	0.0449219	535
PLB1_ENST00000422425	0.269159	0.68972	0.0411215	0.390244	0.0596206	0.152778	0.368286	2.22289	0.042885	535
LY75	0.191011	0.747191	0.0617978	0.255639	0.0827068	0.323529	0.236111	2.95556	0.0658683	534
C9orf174	0.292135	0.655431	0.0524345	0.445714	0.08	0.179487	0.412698	1.90217	0.055336	534
DUOX2	0.277154	0.679775	0.0430712	0.407713	0.0633609	0.155405	0.38342	2.12281	0.0450098	534
C2orf71	0.262172	0.702247	0.0355805	0.373333	0.0506667	0.135714	0.35533	2.35849	0.0368932	534
CILP2	0.303371	0.67603	0.0205993	0.448753	0.0304709	0.0679012	0.435484	2.08671	0.0210325	534
KIF21A	0.195122	0.72045	0.0844278	0.270833	0.117187	0.432692	0.242424	2.57718	0.0922131	533
NLRP9	0.26454	0.690432	0.0450281	0.383152	0.0652174	0.170213	0.359694	2.2303	0.0471513	533
PDZRN3_ENST00000263666	0.302064	0.662289	0.0356473	0.456091	0.0538244	0.118012	0.432796	1.96111	0.036965	533
C6orf174	0.296435	0.677298	0.0262664	0.437673	0.0387812	0.0886076	0.421333	2.09884	0.026975	533
ROR2	0.283302	0.690432	0.0262664	0.410326	0.0380435	0.0927152	0.395288	2.2303	0.026975	533
TYK2	0.27955	0.697936	0.0225141	0.400538	0.0322581	0.0805369	0.388021	2.31056	0.0230326	533
LIFR	0.161654	0.768797	0.0695489	0.210269	0.0904645	0.430233	0.192825	3.3252	0.0747475	532
SVEP1_ENST00000302728	0.218045	0.753759	0.0281955	0.289277	0.0374065	0.12931	0.278846	3.06107	0.0290135	532
PCDHGB1_ENST00000523390	0.343985	0.635338	0.0206767	0.54142	0.0325444	0.0601093	0.524355	1.74227	0.0211132	532
LMTK2_ENST00000297293	0.291353	0.691729	0.0169173	0.421196	0.0244565	0.0580645	0.411141	2.2439	0.0172084	532
NUP214	0.242938	0.719397	0.0376648	0.337696	0.052356	0.155039	0.320896	2.56376	0.0391389	531
DAPK1	0.293785	0.6742	0.0320151	0.435754	0.047486	0.108974	0.416	2.06936	0.0330739	531
CCDC141	0.211321	0.730189	0.0584906	0.289406	0.0801034	0.276786	0.267943	2.70629	0.0621242	530
MAST4_ENST00000261569	0.273585	0.681132	0.045283	0.401662	0.066482	0.165517	0.376623	2.13609	0.0474308	530
ARHGEF11	0.245283	0.713208	0.0415094	0.343915	0.0582011	0.169231	0.325	2.48684	0.0433071	530
IFT140	0.288679	0.679245	0.0320755	0.425	0.0472222	0.111111	0.405836	2.11765	0.0331384	530
PNPLA7	0.283019	0.684906	0.0320755	0.413223	0.046832	0.113333	0.394737	2.17365	0.0331384	530
AOX1	0.237736	0.739623	0.0226415	0.321429	0.0306122	0.0952381	0.311881	2.84058	0.023166	530
C2CD3	0.228733	0.733459	0.0378072	0.311856	0.0515464	0.165289	0.296569	2.75177	0.0392927	529
UMODL1	0.296786	0.671078	0.0321361	0.442254	0.0478873	0.10828	0.422043	2.04023	0.0332031	529
TNKS1BP1	0.274102	0.697543	0.0283554	0.392954	0.0406504	0.103448	0.377604	2.30625	0.0291829	529
CBLB_ENST00000394027	0.540643	0.432892	0.026465	1.24891	0.0611354	0.048951	1.17695	0.763333	0.0271845	529
BAI2	0.270321	0.710775	0.0189036	0.380319	0.0265957	0.0699301	0.370466	2.45752	0.0192678	529
TNIK_ENST00000436636	0.225379	0.691288	0.0833333	0.326027	0.120548	0.369748	0.290954	2.23926	0.0909091	528
DGKI_ENST00000424189	0.248106	0.679924	0.0719697	0.364903	0.10585	0.290076	0.329975	2.12426	0.077551	528
KCNQ5	0.232955	0.712121	0.0549242	0.327128	0.0771277	0.235772	0.303704	2.47368	0.0581162	528
KIAA1404	0.265152	0.689394	0.0454545	0.384615	0.0659341	0.171429	0.360825	2.21951	0.047619	528
ZNFX1	0.265152	0.689394	0.0454545	0.384615	0.0659341	0.171429	0.360825	2.21951	0.047619	528
PPP1R9A	0.200758	0.755682	0.0435606	0.265664	0.0576441	0.216981	0.251185	3.09302	0.0455446	528
AXIN2	0.200758	0.757576	0.0416667	0.265	0.055	0.207547	0.251185	3.125	0.0434783	528
ITIH5L	0.248106	0.715909	0.0359848	0.346561	0.0502646	0.145038	0.329975	2.52	0.0373281	528
LRFN2	0.285985	0.6875	0.0265152	0.415978	0.0385675	0.0927152	0.400531	2.2	0.0272374	528
MLH1	0.11575	0.72296	0.16129	0.160105	0.223097	1.39344	0.130901	2.60959	0.192308	527
ZNF479	0.148008	0.800759	0.0512334	0.184834	0.063981	0.346154	0.173719	4.01905	0.054	527
BCL9_ENST00000234739	0.278937	0.688805	0.0322581	0.404959	0.046832	0.115646	0.386842	2.21341	0.0333333	527
ATP2B3_ENST00000263519	0.324478	0.648956	0.0265655	0.5	0.0409357	0.0818713	0.480337	1.84865	0.0272904	527
DAAM2_ENST00000398904	0.669829	0.316888	0.0132827	2.11377	0.0419162	0.01983	2.02874	0.463889	0.0134615	527
COL21A1	0.174905	0.758555	0.0665399	0.230576	0.0877193	0.380435	0.211982	3.14173	0.0712831	526
CR2	0.169202	0.771863	0.0589354	0.219212	0.0763547	0.348315	0.203661	3.38333	0.0626263	526
MST1R_ENST00000296474	0.19962	0.754753	0.0456274	0.264484	0.0604534	0.228571	0.249406	3.07752	0.0478088	526
STON1-GTF2A1L	0.237643	0.718631	0.0437262	0.330688	0.0608466	0.184	0.311721	2.55405	0.0457256	526
TTBK1	0.247148	0.714829	0.0380228	0.345745	0.0531915	0.153846	0.328283	2.50667	0.0395257	526
MSH3_ENST00000265081	0.19619	0.748571	0.0552381	0.262087	0.0737913	0.281553	0.244076	2.97727	0.0584677	525
GRIK2_ENST00000369138	0.230476	0.72	0.0495238	0.320106	0.0687831	0.214876	0.299505	2.57143	0.0521042	525
CACNA1G_ENST00000416767	0.304762	0.649524	0.0457143	0.469208	0.0703812	0.15	0.438356	1.85326	0.0479042	525
MST1R	0.2	0.754286	0.0457143	0.265152	0.0606061	0.228571	0.25	3.06977	0.0479042	525
MYT1	0.295238	0.666667	0.0380952	0.442857	0.0571429	0.129032	0.418919	2	0.039604	525
HEATR8	0.300952	0.660952	0.0380952	0.455331	0.0576369	0.126582	0.430518	1.94944	0.039604	525
L1CAM	0.264762	0.699048	0.0361905	0.378747	0.0517711	0.136691	0.360104	2.32278	0.0375494	525
TMEM132D_ENST00000389441	0.241905	0.721905	0.0361905	0.335092	0.0501319	0.149606	0.319095	2.59589	0.0375494	525
RECQL4	0.175238	0.80381	0.0209524	0.218009	0.0260664	0.119565	0.212471	4.09709	0.0214008	525
COL6A2_ENST00000357838	0.293333	0.689524	0.0171429	0.425414	0.0248619	0.0584416	0.415094	2.22086	0.0174419	525
ZEB1	0.196565	0.732824	0.0706107	0.268229	0.0963542	0.359223	0.244656	2.74286	0.0759754	524
MDGA2_ENST00000439988	0.162214	0.772901	0.0648855	0.209877	0.0839506	0.4	0.193622	3.40336	0.0693878	524
IQGAP2	0.208015	0.732824	0.0591603	0.283854	0.0807292	0.284404	0.262651	2.74286	0.0628803	524
NFASC_ENST00000367172	0.248092	0.711832	0.0400763	0.348525	0.0563003	0.161538	0.329949	2.4702	0.0417495	524
HEATR8_ENST00000421030	0.301527	0.660305	0.0381679	0.456647	0.0578035	0.126582	0.431694	1.94382	0.0396825	524
JAKMIP1_ENST00000409021	0.267176	0.698473	0.0343511	0.382514	0.0491803	0.128571	0.364583	2.31646	0.0355731	524
COL9A1	0.232824	0.734733	0.0324427	0.316883	0.0441558	0.139344	0.303483	2.76978	0.0335306	524
AXL_ENST00000301178	0.152672	0.818702	0.028626	0.18648	0.034965	0.1875	0.18018	4.51579	0.0294695	524
LMTK2	0.295802	0.687023	0.0171756	0.430556	0.025	0.0580645	0.420054	2.19512	0.0174757	524
PIEZO1	0.272901	0.709924	0.0171756	0.384409	0.0241935	0.0629371	0.375328	2.44737	0.0174757	524
COL21A1_ENST00000244728	0.16826	0.768642	0.0630975	0.218905	0.0820896	0.375	0.202299	3.32231	0.0673469	523
KIDINS220	0.248566	0.692161	0.0592734	0.359116	0.0856354	0.238462	0.330789	2.24845	0.0630081	523
GPR116	0.263862	0.695985	0.040153	0.379121	0.0576923	0.152174	0.358442	2.28931	0.0418327	523
SLC4A10	0.175908	0.785851	0.0382409	0.223844	0.0486618	0.217391	0.213457	3.66964	0.0397614	523
KIF17	0.305927	0.66348	0.0305927	0.461095	0.0461095	0.1	0.440771	1.97159	0.0315582	523
KIAA0415_ENST00000450194	0.286807	0.686424	0.0267686	0.417827	0.0389972	0.0933333	0.402145	2.18902	0.0275049	523
FCRL5_ENST00000356953	0.248566	0.728489	0.0229446	0.341207	0.0314961	0.0923077	0.330789	2.6831	0.0234834	523
AQP7_ENST00000541274	0.240918	0.759082	0	0.31738	0	0	0.31738	3.15079	0	523
MSH2	0.124521	0.659004	0.216475	0.188953	0.328488	1.73846	0.142232	1.93258	0.276284	522
GATA3	0.204981	0.708812	0.0862069	0.289189	0.121622	0.420561	0.257831	2.43421	0.0943396	522
VWDE_ENST00000275358	0.14751	0.785441	0.0670498	0.187805	0.0853659	0.454545	0.173034	3.66071	0.0718686	522
HFM1	0.183908	0.758621	0.0574713	0.242424	0.0757576	0.3125	0.225352	3.14286	0.0609756	522
NLRP1_ENST00000572272	0.243295	0.708812	0.0478927	0.343243	0.0675676	0.19685	0.321519	2.43421	0.0503018	522
EVC2_ENST00000344938	0.252874	0.699234	0.0478927	0.361644	0.0684932	0.189394	0.338462	2.32484	0.0503018	522
DISP1	0.268199	0.695402	0.0363985	0.385675	0.0523416	0.135714	0.366492	2.28302	0.0377734	522
LAMC1	0.220307	0.745211	0.0344828	0.29563	0.0462725	0.156522	0.282555	2.92481	0.0357143	522
ACE	0.247126	0.720307	0.032567	0.343085	0.0452128	0.131783	0.328244	2.57534	0.0336634	522
MAST1	0.310345	0.659004	0.0306513	0.47093	0.0465116	0.0987654	0.45	1.93258	0.0316206	522
MYO1F	0.319923	0.649425	0.0306513	0.492625	0.0471976	0.0958084	0.470423	1.85246	0.0316206	522
TNS3	0.279693	0.695402	0.0249042	0.402204	0.0358127	0.0890411	0.388298	2.28302	0.0255403	522
FILIP1_ENST00000393004	0.245681	0.685221	0.0690979	0.358543	0.10084	0.28125	0.3257	2.17683	0.0742268	521
ABL1_ENST00000372348	0.253359	0.681382	0.0652591	0.371831	0.0957746	0.257576	0.339332	2.13855	0.0698152	521
C7_ENST00000313164	0.209213	0.729367	0.0614203	0.286842	0.0842105	0.293578	0.264563	2.69504	0.0654397	521
TP63_ENST00000354600	0.197697	0.742802	0.059501	0.26615	0.0801034	0.300971	0.246411	2.88806	0.0632653	521
MAP3K4	0.193858	0.752399	0.0537428	0.257653	0.0714286	0.277228	0.240476	3.03876	0.0567951	521
MEGF10	0.289827	0.660269	0.049904	0.438953	0.0755814	0.172185	0.408108	1.9435	0.0525253	521
CLCN1	0.224568	0.727447	0.0479846	0.308707	0.0659631	0.213675	0.289604	2.66901	0.0504032	521
KIAA0564	0.21881	0.735125	0.0460653	0.29765	0.0626632	0.210526	0.280098	2.77536	0.0482897	521
MADD	0.232246	0.727447	0.0403071	0.319261	0.055409	0.173554	0.3025	2.66901	0.042	521
PTPRH	0.236084	0.729367	0.0345489	0.323684	0.0473684	0.146341	0.309045	2.69504	0.0357853	521
XPO1	0.109405	0.857965	0.0326296	0.127517	0.0380313	0.298246	0.122845	6.04054	0.0337302	521
MAST1_ENST00000251472	0.309021	0.660269	0.0307102	0.468023	0.0465116	0.0993789	0.447222	1.9435	0.0316832	521
ZNF835	0.318618	0.652591	0.0287908	0.488235	0.0441176	0.0903614	0.467606	1.87845	0.0296443	521
ABL1_ENST00000318560	0.251923	0.680769	0.0673077	0.370056	0.0988701	0.267176	0.336761	2.13253	0.0721649	520
DOPEY1	0.169231	0.769231	0.0615385	0.22	0.08	0.363636	0.203704	3.33333	0.0655738	520
FLT4_ENST00000376868	0.251923	0.703846	0.0442308	0.357923	0.0628415	0.175573	0.336761	2.37662	0.0462777	520
COL16A1	0.261538	0.696154	0.0423077	0.375691	0.0607735	0.161765	0.354167	2.29114	0.0441767	520
KCNMA1	0.269231	0.690385	0.0403846	0.389972	0.0584958	0.15	0.368421	2.22981	0.0420842	520
SALL4	0.259615	0.725	0.0153846	0.35809	0.0212202	0.0592593	0.350649	2.63636	0.015625	520
ABCB5	0.186898	0.734104	0.0789981	0.254593	0.107612	0.42268	0.229858	2.76087	0.0857741	519
MDGA2	0.16185	0.77264	0.0655106	0.209476	0.084788	0.404762	0.193103	3.39831	0.0701031	519
INPP4B	0.190751	0.745665	0.0635838	0.255814	0.0852713	0.333333	0.235714	2.93182	0.0679012	519
KIF16B	0.235067	0.712909	0.0520231	0.32973	0.072973	0.221311	0.307305	2.48322	0.054878	519
GUCY1A2	0.244701	0.705202	0.0500963	0.346995	0.0710383	0.204724	0.32398	2.39216	0.0527383	519
PHRF1_ENST00000264555	0.26975	0.695568	0.0346821	0.387812	0.0498615	0.128571	0.369393	2.28481	0.0359281	519
PLG	0.289017	0.676301	0.0346821	0.42735	0.0512821	0.12	0.406504	2.08929	0.0359281	519
DAPK1_ENST00000408954	0.283237	0.685934	0.0308285	0.412921	0.0449438	0.108844	0.395161	2.18405	0.0318091	519
PCDHB13	0.314066	0.666667	0.0192678	0.471098	0.0289017	0.0613497	0.457865	2	0.0196464	519
MAP3K13	0.156371	0.745174	0.0984556	0.209845	0.132124	0.62963	0.185355	2.92424	0.109208	518
ADAM7	0.223938	0.73166	0.0444015	0.306069	0.060686	0.198276	0.288557	2.72662	0.0464646	518
NFASC_ENST00000367171	0.245174	0.716216	0.03861	0.342318	0.0539084	0.15748	0.324808	2.52381	0.0401606	518
LOC340578	0.254826	0.718147	0.027027	0.354839	0.0376344	0.106061	0.341969	2.54795	0.0277778	518
MLLT4	0.239845	0.661509	0.098646	0.362573	0.149123	0.41129	0.315522	1.95429	0.109442	517
RGS22	0.187621	0.731141	0.0812379	0.256614	0.111111	0.43299	0.230952	2.71942	0.0884211	517
MCM3AP	0.245648	0.696325	0.0580271	0.352778	0.0833333	0.23622	0.325641	2.29299	0.0616016	517
SCAND3	0.195358	0.752418	0.0522244	0.25964	0.0694087	0.267327	0.242788	3.03906	0.055102	517
FANCD2	0.259188	0.688588	0.0522244	0.376404	0.0758427	0.201493	0.349869	2.21118	0.055102	517
GRIA4	0.199226	0.752418	0.0483559	0.264781	0.0642674	0.242718	0.248792	3.03906	0.050813	517
ITGAM	0.274662	0.686654	0.0386847	0.4	0.056338	0.140845	0.378667	2.19136	0.0402414	517
PCDHGA6	0.303675	0.659574	0.0367505	0.460411	0.0557185	0.121019	0.436111	1.9375	0.0381526	517
DENND3	0.295938	0.680851	0.0232108	0.434659	0.0340909	0.0784314	0.42033	2.13333	0.0237624	517
PCDHGA7	0.282398	0.70793	0.00967118	0.398907	0.0136612	0.0342466	0.393531	2.42384	0.00976562	517
RASA1	0.0852713	0.687984	0.226744	0.123944	0.329577	2.65909	0.0932203	2.20497	0.293233	516
ABCB4	0.24031	0.680233	0.0794574	0.353276	0.116809	0.330645	0.316327	2.12727	0.0863158	516
STK31	0.176357	0.75969	0.0639535	0.232143	0.0841837	0.362637	0.214118	3.16129	0.068323	516
BRWD1	0.168605	0.773256	0.0581395	0.218045	0.075188	0.344828	0.202797	3.41026	0.0617284	516
DDX60_ENST00000393743	0.21124	0.736434	0.0523256	0.286842	0.0710526	0.247706	0.267813	2.79412	0.0552147	516
ZFAT_ENST00000377838	0.26938	0.680233	0.0503876	0.396011	0.0740741	0.18705	0.3687	2.12727	0.0530612	516
KIAA1755	0.24031	0.71124	0.0484496	0.337875	0.0681199	0.201613	0.316327	2.46309	0.0509165	516
MRC2	0.267442	0.69186	0.0406977	0.386555	0.0588235	0.152174	0.365079	2.24528	0.0424242	516
MYO3B_ENST00000408978	0.294574	0.672481	0.0329457	0.43804	0.0489914	0.111842	0.417582	2.05325	0.0340681	516
GBF1	0.24031	0.73062	0.0290698	0.328912	0.0397878	0.120968	0.316327	2.71223	0.0299401	516
SIRPA	0.141473	0.841085	0.0174419	0.168203	0.0207373	0.123288	0.164786	5.29268	0.0177515	516
PCDHGA12_ENST00000252085	0.377907	0.616279	0.00581395	0.613208	0.00943396	0.0153846	0.607477	1.60606	0.00584795	516
SLITRK6	0.190291	0.753398	0.0563107	0.252577	0.0747423	0.295918	0.235012	3.05512	0.0596708	515
DDX60	0.21165	0.735922	0.0524272	0.287599	0.0712401	0.247706	0.268473	2.78676	0.0553279	515
RERE	0.258252	0.693204	0.0485437	0.372549	0.070028	0.18797	0.348168	2.25949	0.0510204	515
ATP4A	0.273786	0.699029	0.0271845	0.391667	0.0388889	0.0992908	0.377005	2.32258	0.0279441	515
CIITA_ENST00000324288	0.330097	0.648544	0.0213592	0.508982	0.0329341	0.0647059	0.492754	1.8453	0.0218254	515
OBSL1	0.304854	0.673786	0.0213592	0.45245	0.0317003	0.0700637	0.438547	2.06548	0.0218254	515
FRG2B	0.143689	0.84466	0.0116505	0.170115	0.0137931	0.0810811	0.1678	5.4375	0.0117878	515
PCDHGA12	0.378641	0.615534	0.00582524	0.615142	0.00946372	0.0153846	0.609375	1.60101	0.00585938	515
NEBL	0.243191	0.702335	0.0544747	0.34626	0.0775623	0.224	0.321337	2.35948	0.0576132	514
FLT1_ENST00000541932	0.161479	0.785992	0.0525292	0.205446	0.0668317	0.325301	0.192575	3.67273	0.0554415	514
PRKD1	0.237354	0.714008	0.0486381	0.332425	0.0681199	0.204918	0.311224	2.4966	0.0511247	514
DSG4	0.215953	0.737354	0.0466926	0.292876	0.0633245	0.216216	0.275434	2.80741	0.0489796	514
C13orf40	0.210117	0.747082	0.0428016	0.28125	0.0572917	0.203704	0.26601	2.95385	0.0447154	514
SLCO6A1	0.254864	0.712062	0.0330739	0.357923	0.0464481	0.129771	0.342037	2.47297	0.0342052	514
KDM6B	0.266537	0.702335	0.0311284	0.379501	0.0443213	0.116788	0.363395	2.35948	0.0321285	514
CASP8_ENST00000358485	0.0623782	0.709552	0.22807	0.0879121	0.321429	3.65625	0.0665281	2.44295	0.295455	513
KIF20B	0.194932	0.729045	0.0760234	0.26738	0.104278	0.39	0.242131	2.69065	0.0822785	513
ARHGAP21	0.208577	0.727096	0.0643275	0.286863	0.0884718	0.308411	0.263547	2.66429	0.06875	513
CDC42BPB	0.306043	0.637427	0.0565302	0.480122	0.088685	0.184713	0.441011	1.75806	0.0599174	513
HEPHL1	0.214425	0.732943	0.0526316	0.292553	0.0718085	0.245455	0.272953	2.74453	0.0555556	513
PTPRK_ENST00000368227	0.237817	0.7154	0.0467836	0.332425	0.0653951	0.196721	0.31202	2.5137	0.0490798	513
PLEKHH2	0.216797	0.710938	0.0722656	0.304945	0.101648	0.333333	0.276808	2.45946	0.0778947	512
ZBBX_ENST00000455345	0.179688	0.751953	0.0683594	0.238961	0.0909091	0.380435	0.219048	3.0315	0.0733753	512
SUPT6H	0.234375	0.71875	0.046875	0.326087	0.0652174	0.2	0.306122	2.55556	0.0491803	512
BLM	0.164062	0.791016	0.0449219	0.207407	0.0567901	0.27381	0.196262	3.78505	0.0470348	512
MUC4	0.291016	0.671875	0.0371094	0.43314	0.0552326	0.127517	0.410468	2.04762	0.0385396	512
RGS12	0.251953	0.710938	0.0371094	0.354396	0.0521978	0.147287	0.336815	2.45946	0.0385396	512
POLR1A	0.275391	0.689453	0.0351562	0.399433	0.0509915	0.12766	0.380054	2.22013	0.0364372	512
GOLGA3_ENST00000456883	0.292969	0.677734	0.0292969	0.432277	0.0432277	0.1	0.414365	2.10303	0.0301811	512
MYH14	0.308594	0.667969	0.0234375	0.461988	0.0350877	0.0759494	0.446328	2.01176	0.024	512
PCDHGB1	0.345703	0.632812	0.0214844	0.546296	0.0339506	0.0621469	0.528358	1.7234	0.0219561	512
NUP98	0.166341	0.778865	0.0547945	0.213568	0.0703518	0.329412	0.199531	3.52212	0.057971	511
KANK4	0.248532	0.706458	0.0450098	0.351801	0.0637119	0.181102	0.330729	2.40667	0.0471311	511
PCDHAC2	0.303327	0.651663	0.0450098	0.465465	0.0690691	0.148387	0.435393	1.87079	0.0471311	511
ATP7B	0.250489	0.7182	0.0313112	0.348774	0.0435967	0.125	0.334204	2.54861	0.0323232	511
PCDH9_ENST00000377861	0.246575	0.72407	0.0293542	0.340541	0.0405405	0.119048	0.327273	2.62411	0.0302419	511
NBPF3	0.240705	0.747554	0.0117417	0.32199	0.0157068	0.0487805	0.31701	2.96124	0.0118812	511
TJP1	0.235294	0.690196	0.0745098	0.340909	0.107955	0.316667	0.307692	2.22785	0.0805085	510
ZNF236_ENST00000543926	0.252941	0.682353	0.0647059	0.37069	0.0948276	0.255814	0.338583	2.14815	0.0691824	510
FGFR4_ENST00000292408	0.196078	0.754902	0.0490196	0.25974	0.0649351	0.25	0.243902	3.08	0.0515464	510
CCDC129	0.227451	0.727451	0.045098	0.312668	0.0619946	0.198276	0.294416	2.66906	0.0472279	510
RASGRF2	0.22549	0.735294	0.0392157	0.306667	0.0533333	0.173913	0.291139	2.77778	0.0408163	510
CELSR3_ENST00000544264	0.254902	0.707843	0.0372549	0.360111	0.0526316	0.146154	0.342105	2.42282	0.0386965	510
EPHA10	0.298039	0.664706	0.0372549	0.448378	0.0560472	0.125	0.424581	1.98246	0.0386965	510
CSF3R_ENST00000373104	0.396078	0.57451	0.0294118	0.68942	0.0511945	0.0742574	0.655844	1.35023	0.030303	510
PTCHD3	0.315686	0.660784	0.0235294	0.477745	0.0356083	0.0745342	0.461318	1.94798	0.0240964	510
MLLT4_ENST00000392108	0.235756	0.660118	0.104126	0.357143	0.157738	0.441667	0.308483	1.9422	0.116228	509
BRIP1	0.123772	0.817289	0.0589391	0.151442	0.0721154	0.47619	0.141256	4.47312	0.0626305	509
MLL5	0.21611	0.726916	0.0569745	0.297297	0.0783784	0.263636	0.275689	2.66187	0.0604167	509
CUX1_ENST00000292538	0.40668	0.53831	0.0550098	0.755474	0.10219	0.135266	0.68543	1.16596	0.0582121	509
MAP3K4_ENST00000392142	0.18664	0.75835	0.0550098	0.246114	0.0725389	0.294737	0.229469	3.13821	0.0582121	509
PRKD1_ENST00000331968	0.24165	0.707269	0.0510806	0.341667	0.0722222	0.211382	0.318653	2.41611	0.0538302	509
ANKS1B_ENST00000329257	0.231827	0.717092	0.0510806	0.323288	0.0712329	0.220339	0.30179	2.53472	0.0538302	509
FLJ43860	0.29666	0.666012	0.0373281	0.445428	0.0560472	0.125828	0.421788	1.99412	0.0387755	509
COL20A1_ENST00000326996	0.324165	0.656189	0.0196464	0.494012	0.0299401	0.0606061	0.479651	1.90857	0.0200401	509
BCL11A_ENST00000356842	0.373281	0.614931	0.0117878	0.607029	0.0191693	0.0315789	0.595611	1.59694	0.0119284	509
TCF7L2_ENST00000543371	0.17126	0.704724	0.124016	0.243017	0.175978	0.724138	0.206651	2.38667	0.141573	508
SYNPO2_ENST00000307142	0.21063	0.73622	0.0531496	0.286096	0.0721925	0.252336	0.266833	2.79104	0.0561331	508
FGFR2_ENST00000369056	0.124016	0.84252	0.0334646	0.147196	0.0397196	0.269841	0.141573	5.35	0.0346232	508
TRERF1	0.232283	0.73622	0.0314961	0.315508	0.0427807	0.135593	0.302564	2.79104	0.0325203	508
RADIL	0.324803	0.645669	0.0295276	0.503049	0.0457317	0.0909091	0.48105	1.82222	0.030426	508
OR8U1	0.393701	0.600394	0.00590551	0.655738	0.00983607	0.015	0.649351	1.50246	0.00594059	508
CEP290	0.151874	0.745562	0.102564	0.203704	0.137566	0.675325	0.17907	2.93023	0.114286	507
CNTRL_ENST00000373855	0.191321	0.712032	0.0966469	0.268698	0.135734	0.505155	0.236585	2.4726	0.106987	507
ZFC3H1	0.155819	0.769231	0.0749507	0.202564	0.0974359	0.481013	0.184579	3.33333	0.0810235	507
DMD	0.201183	0.729783	0.0690335	0.275676	0.0945946	0.343137	0.251852	2.70073	0.0741525	507
KNTC1	0.205128	0.747535	0.0473373	0.274406	0.0633245	0.230769	0.258065	2.96094	0.0496894	507
ARHGAP32_ENST00000310343	0.272189	0.698225	0.0295858	0.389831	0.0423729	0.108696	0.373984	2.31373	0.0304878	507
KCNH6	0.260355	0.719921	0.0197239	0.361644	0.0273973	0.0757576	0.352	2.57042	0.0201207	507
DYNC2H1_ENST00000398093	0.179842	0.743083	0.0770751	0.242021	0.103723	0.428571	0.219277	2.89231	0.0835118	506
ANO2_ENST00000327087	0.272727	0.679842	0.0474308	0.401163	0.0697674	0.173913	0.375	2.12346	0.0497925	506
DSG4_ENST00000359747	0.215415	0.743083	0.041502	0.289894	0.0558511	0.192661	0.274559	2.89231	0.043299	506
SH3TC1	0.296443	0.666008	0.0375494	0.445104	0.0563798	0.126667	0.421348	1.99408	0.0390144	506
RBFOX1_ENST00000311745	0.272727	0.701581	0.0256917	0.388732	0.0366197	0.0942029	0.375	2.35099	0.0263692	506
MEGF6	0.254941	0.721344	0.0237154	0.353425	0.0328767	0.0930233	0.342175	2.58865	0.0242915	506
BCL9L	0.263366	0.689109	0.0475248	0.382184	0.0689655	0.180451	0.357527	2.21656	0.049896	505
RFX6	0.213861	0.738614	0.0475248	0.289544	0.0643432	0.222222	0.27204	2.82576	0.049896	505
NAV1	0.267327	0.69505	0.0376238	0.384615	0.0541311	0.140741	0.364865	2.27922	0.0390947	505
SON_ENST00000290239	0.324752	0.671287	0.0039604	0.483776	0.00589971	0.0121951	0.480938	2.04217	0.00397614	505
OR4A15	0.210317	0.732143	0.0575397	0.287263	0.0785908	0.273585	0.266332	2.73333	0.0610526	504
SYNPO2	0.212302	0.738095	0.0496032	0.287634	0.0672043	0.233645	0.269521	2.81818	0.0521921	504
NTRK2	0.178571	0.77381	0.047619	0.230769	0.0615385	0.266667	0.217391	3.42105	0.05	504
MYH10_ENST00000396239	0.218254	0.740079	0.0416667	0.294906	0.0563003	0.190909	0.279188	2.84733	0.0434783	504
GXYLT1	0.0992063	0.867063	0.0337302	0.114416	0.0389016	0.34	0.110132	6.52239	0.0349076	504
OR4C15	0.265873	0.706349	0.0277778	0.376404	0.0393258	0.104478	0.362162	2.40541	0.0285714	504
PNPLA6	0.275794	0.698413	0.0257937	0.394886	0.0369318	0.0935252	0.380822	2.31579	0.0264766	504
HRAS_ENST00000397594	0.164683	0.823413	0.0119048	0.2	0.0144578	0.0722892	0.19715	4.66292	0.0120482	504
ANKRD12	0.163022	0.761431	0.0755467	0.214099	0.0992167	0.463415	0.194774	3.19167	0.0817204	503
PARD3	0.166998	0.759443	0.0735586	0.219895	0.0968586	0.440476	0.200477	3.15702	0.0793991	503
TRPM8	0.280318	0.673956	0.0457256	0.415929	0.0678466	0.163121	0.389503	2.06707	0.0479167	503
MEFV	0.300199	0.662028	0.0377734	0.453453	0.0570571	0.125828	0.428977	1.95882	0.0392562	503
CGNL1	0.258449	0.707753	0.0337972	0.365169	0.0477528	0.130769	0.348525	2.42177	0.0349794	503
C6orf138	0.282306	0.691849	0.0258449	0.408046	0.0373563	0.0915493	0.393352	2.24516	0.0265306	503
LRRC37A3	0.159046	0.829026	0.0119284	0.191847	0.0143885	0.075	0.189125	4.84884	0.0120724	503
EYS	0.165339	0.75498	0.0796813	0.218997	0.105541	0.481928	0.198091	3.0813	0.0865801	502
ZBBX	0.179283	0.750996	0.0697211	0.238727	0.0928382	0.388889	0.218447	3.016	0.0749465	502
HELZ	0.207171	0.727092	0.0657371	0.284932	0.090411	0.317308	0.261307	2.66423	0.0703625	502
CACNA2D4	0.314741	0.631474	0.0537849	0.498423	0.0851735	0.170886	0.459302	1.71351	0.0568421	502
FAT3_ENST00000541502	0.209163	0.743028	0.0478088	0.281501	0.0643432	0.228571	0.264484	2.89147	0.0502092	502
SLC4A10_ENST00000446997	0.177291	0.780876	0.0418327	0.227041	0.0535714	0.235955	0.215496	3.56364	0.043659	502
LPHN2_ENST00000370715	0.221116	0.739044	0.0398406	0.299191	0.0539084	0.18018	0.283887	2.83206	0.0414938	502
[truncated: 27,416 more rows]

## Sheet: SSI
Gene symbol	indel_fS	indel_fM	indel_fN	indel_rSM	indel_rNM	indel_rNS	indel_rSMN	indel_rMSN	indel_rNSM	Number of 'substitutions and subtle indels'
BRAF	0.00349374	0.994998	0.00150782	0.0035113	0.0015154	0.431579	0.00350599	198.938	0.0015101	54383
JAK2	0.00492028	0.993004	0.00207607	0.00495495	0.00209069	0.421941	0.00494461	141.932	0.00208039	48168
KRAS	0.00258166	0.996653	0.000765747	0.00259033	0.000768319	0.29661	0.00258834	297.739	0.000766334	45707
TP53	0.0215387	0.774863	0.203598	0.0277968	0.262754	9.45266	0.0220128	3.44174	0.255648	35796
EGFR	0.0105524	0.986971	0.00247658	0.0106917	0.00250927	0.234694	0.0106649	75.7521	0.00248273	27861
FLT3	0.0148588	0.978721	0.00642045	0.0151818	0.00656004	0.432099	0.0150829	45.9943	0.00646194	16354
TTN_ENST00000356127	0.203166	0.734076	0.0627581	0.276764	0.0854927	0.308901	0.254967	2.76047	0.0669604	15982
PIK3CA	0.00810229	0.983352	0.00854539	0.00823946	0.00869005	1.05469	0.00816847	59.0684	0.00861904	15798
TTN_ENST00000342992	0.204452	0.733599	0.0619492	0.278697	0.0844456	0.303001	0.256995	2.75374	0.0660404	15319
TP53_ENST00000269305	0.0125162	0.737977	0.249507	0.0169601	0.338096	19.9348	0.0126748	2.81646	0.332457	14701
TP53_ENST00000455263	0.0128265	0.76236	0.224813	0.0168247	0.294891	17.5273	0.0129931	3.20805	0.290012	12864
TP53_ENST00000420246	0.0132098	0.760451	0.226339	0.017371	0.297638	17.1341	0.0133867	3.17451	0.292556	12415
TTN_ENST00000342175	0.200389	0.735895	0.063716	0.272307	0.0865829	0.317961	0.250608	2.78637	0.0680519	12336
TTN_ENST00000359218	0.199658	0.736662	0.0636792	0.271031	0.0864429	0.318941	0.249467	2.79741	0.0680101	12296
IDH1	0.0049114	0.991814	0.00327427	0.00495194	0.00330129	0.666667	0.00493564	121.165	0.00328502	10384
TP53_ENST00000413465	0.0134442	0.745914	0.240642	0.0180239	0.322614	17.8993	0.0136275	2.93567	0.316902	10339
MUC4_ENST00000463781	0.126394	0.865584	0.00802191	0.146022	0.00926763	0.0634675	0.144681	6.43959	0.00808679	10222
APC	0.0577121	0.198193	0.744095	0.291192	3.7544	12.8932	0.0612467	0.247182	2.9077	9738
MUC16_ENST00000397910	0.232264	0.733152	0.0345836	0.316802	0.0471712	0.148898	0.302531	2.74745	0.0358225	9571
KIT	0.0322657	0.95694	0.0107948	0.0337176	0.0112805	0.334559	0.0333415	22.2231	0.0109126	8430
TP53_ENST00000545858	0.00692207	0.792815	0.200263	0.008731	0.252597	28.931	0.00697032	3.82661	0.25041	8379
CTNNB1	0.015512	0.972788	0.0116998	0.0159459	0.012027	0.754237	0.0157564	35.7488	0.0118383	7607
NRAS	0.00650339	0.990452	0.00304414	0.00656608	0.00307348	0.468085	0.00654596	103.739	0.00305344	7227
MUC16	0.226641	0.733414	0.0399444	0.309022	0.0544637	0.176245	0.293061	2.75114	0.0416064	5758
KRAS_ENST00000256078	0.0343324	0.963488	0.00217984	0.0356335	0.00226244	0.0634921	0.035553	26.3881	0.0021846	5505
NOTCH1	0.130783	0.587067	0.282149	0.222774	0.480608	2.15738	0.150461	1.4217	0.393047	5490
PTEN	0.0119784	0.489567	0.498454	0.0244672	1.01815	41.6129	0.0121236	0.959122	0.993837	5176
TP53_ENST00000414315	0.00649095	0.721676	0.271833	0.00899428	0.376669	41.8788	0.00653336	2.59293	0.373312	5084
MUC16_ENST00000331986	0.230658	0.729624	0.0397187	0.316133	0.0544372	0.172197	0.299812	2.69855	0.0413615	4834
FGFR3	0.031723	0.958532	0.00974497	0.0330954	0.0101666	0.30719	0.0327623	23.115	0.00984087	4823
PIK3CA_ENST00000263967	0.0164002	0.970313	0.0132863	0.016902	0.0136928	0.810127	0.0166737	32.6853	0.0134652	4817
KMT2C	0.121675	0.628652	0.249673	0.193548	0.397156	2.05197	0.13853	1.69289	0.332752	4586
KMT2D	0.156814	0.524819	0.318366	0.298796	0.606621	2.03022	0.185978	1.10446	0.467064	4432
MLL2_ENST00000301067	0.188894	0.508364	0.302742	0.371572	0.595521	1.60271	0.232885	1.03403	0.434189	4304
LRP1B	0.195048	0.730203	0.0747489	0.267115	0.102367	0.383234	0.24231	2.70649	0.0807877	4281
TET2	0.028837	0.433031	0.538132	0.0665933	1.24271	18.6612	0.0296933	0.763766	1.16512	4196
SYNE1_ENST00000265368	0.211711	0.714251	0.0740382	0.296409	0.103659	0.349714	0.26857	2.49958	0.0799582	4133
SYNE1	0.211049	0.71529	0.0736613	0.295054	0.102981	0.349024	0.267506	2.51234	0.0795187	4127
MLL3_ENST00000355193	0.134093	0.63579	0.230116	0.210908	0.361937	1.71609	0.154859	1.74567	0.298898	4124
FLG	0.192883	0.763436	0.043681	0.252652	0.0572163	0.226463	0.238978	3.22718	0.0456762	4075
NPM1	0.00645001	0.0377078	0.955842	0.171053	25.3487	148.192	0.00649189	0.0391854	21.6461	4031
MED12	0.0401211	0.931617	0.0282614	0.0430661	0.0303359	0.704403	0.0417981	13.6236	0.0290834	3963
CSMD3	0.177568	0.739908	0.0825243	0.239986	0.111533	0.464748	0.215906	2.84479	0.0899471	3914
SYNE1_ENST00000423061	0.214985	0.71138	0.0736354	0.302208	0.103511	0.342515	0.27386	2.46476	0.0794886	3884
MUC6	0.160426	0.814353	0.025221	0.196999	0.0309706	0.157212	0.191081	4.38655	0.0258736	3846
ARID1A	0.0405441	0.338739	0.620717	0.119691	1.83243	15.3097	0.0422574	0.512263	1.63655	3823
MUC6_ENST00000421673	0.159443	0.816654	0.0239033	0.19524	0.0292699	0.149918	0.189688	4.45415	0.0244887	3807
SYNE1_ENST00000448038	0.223976	0.705703	0.0703212	0.317379	0.0996469	0.313968	0.288619	2.39793	0.0756403	3612
RYR2	0.223369	0.719186	0.0574456	0.310585	0.0798759	0.257179	0.287612	2.56107	0.0609467	3586
PCLO	0.18413	0.727019	0.0888516	0.253267	0.122214	0.482549	0.225685	2.66325	0.0975161	3579
CSMD3_ENST00000343508	0.177672	0.736989	0.0853386	0.241078	0.115793	0.480315	0.21606	2.80213	0.0933007	3574
DNMT3A	0.0504249	0.827195	0.12238	0.0609589	0.147945	2.42697	0.0531026	4.78689	0.139445	3530
USH2A	0.197896	0.736423	0.065681	0.268726	0.0891892	0.331897	0.246721	2.79396	0.0702982	3517
PCLO_ENST00000333891	0.183295	0.732326	0.0843786	0.250292	0.11522	0.460342	0.224433	2.73589	0.0921544	3508
DNAH5	0.233789	0.692934	0.0732771	0.33739	0.105749	0.313433	0.305123	2.25663	0.0790712	3439
SYNE1_ENST00000341594	0.223742	0.70643	0.0698283	0.316722	0.0988468	0.312094	0.288231	2.40634	0.0750704	3437
TTN_ENST00000360870	0.202156	0.737547	0.0602971	0.274092	0.0817536	0.298271	0.253377	2.81021	0.0641662	3433
CALR	0.00933761	0.0376423	0.95302	0.248062	25.3178	102.063	0.00942563	0.0391146	20.2857	3427
MUC17	0.218458	0.757593	0.0239486	0.288358	0.0316114	0.109626	0.279522	3.1253	0.0245362	3424
OBSCN	0.273449	0.664804	0.0617465	0.411322	0.0928793	0.225806	0.376366	1.98333	0.0658101	3401
AHNAK2_ENST00000333244	0.290133	0.670103	0.0397644	0.432967	0.0593407	0.137056	0.408714	2.03125	0.041411	3395
OBSCN_ENST00000570156	0.277547	0.665581	0.056872	0.417	0.0854473	0.204909	0.384174	1.99026	0.0603015	3376
NOTCH1_ENST00000277541	0.19431	0.608051	0.197639	0.319562	0.325037	1.01713	0.241172	1.55135	0.246322	3304
VHL	0.027414	0.452026	0.52056	0.0606469	1.15162	18.9889	0.0281867	0.824903	1.08577	3283
ATM	0.0549345	0.71862	0.226445	0.0764444	0.315111	4.12209	0.0581277	2.55392	0.292733	3131
FAT4	0.223586	0.72504	0.0513732	0.308378	0.0708556	0.229769	0.287973	2.6369	0.0541553	3095
FAT4_ENST00000394329	0.226329	0.72179	0.0518807	0.313567	0.0718778	0.229226	0.29254	2.59441	0.0547196	3084
USH2A_ENST00000366943	0.205688	0.729497	0.0648148	0.281958	0.0888486	0.315113	0.258951	2.69682	0.0693069	3024
CSMD1_ENST00000537824	0.263843	0.684123	0.0520347	0.385666	0.0760605	0.197219	0.358405	2.16579	0.0548909	2998
NF1	0.121038	0.46089	0.418071	0.262619	0.907096	3.45404	0.137706	0.854909	0.718424	2966
PCLO_ENST00000423517	0.189768	0.730384	0.0798479	0.25982	0.109323	0.420765	0.234215	2.70897	0.0867769	2893
FAT3_ENST00000409404	0.221184	0.724126	0.0546902	0.305449	0.0755258	0.247261	0.284	2.62484	0.0578543	2889
FAT1	0.15097	0.644044	0.204986	0.234409	0.31828	1.3578	0.177814	1.80934	0.25784	2888
FAT3_ENST00000298047	0.222068	0.72259	0.0553428	0.307322	0.0765896	0.249216	0.285459	2.60477	0.0585851	2873
ZFHX4	0.235294	0.697529	0.0671772	0.337325	0.0963074	0.285503	0.307692	2.3061	0.0720149	2873
OBSCN_ENST00000284548	0.277349	0.669004	0.0536466	0.41457	0.0801887	0.193426	0.383794	2.02119	0.0566877	2852
RYR2_ENST00000360064	0.222301	0.720708	0.0569912	0.308448	0.0790766	0.256369	0.285844	2.58048	0.0604354	2825
RYR1	0.306101	0.651088	0.0428113	0.470137	0.0657534	0.13986	0.441131	1.86605	0.0447261	2803
MUC12	0.146412	0.837	0.0165885	0.174925	0.019819	0.1133	0.171525	5.13496	0.0168684	2773
CSMD1_ENST00000318252	0.261544	0.683983	0.0544733	0.382384	0.0796414	0.208276	0.354177	2.16438	0.0576116	2772
FAT	0.156515	0.641565	0.20192	0.243959	0.31473	1.29009	0.185558	1.78991	0.253006	2709
MUC5AC	0.27548	0.689069	0.0354505	0.399786	0.0514469	0.128686	0.380224	2.21615	0.0367534	2708
MUC12_ENST00000379442	0.143068	0.841774	0.0151571	0.16996	0.0180061	0.105943	0.166954	5.32009	0.0153904	2705
SF3B1	0.140631	0.846011	0.0133581	0.166228	0.0157895	0.0949868	0.163644	5.49398	0.0135389	2695
MUC5B	0.275758	0.689394	0.0348485	0.4	0.0505495	0.126374	0.380753	2.21951	0.0361068	2640
CDKN2A	0.0538695	0.47648	0.469651	0.113057	0.985669	8.71831	0.0569366	0.910145	0.885551	2636
APOB	0.236433	0.701708	0.0618596	0.336939	0.0881558	0.261637	0.309642	2.35242	0.0659385	2635
ASXL1	0.0887529	0.322877	0.58837	0.274882	1.82227	6.62931	0.0973971	0.476836	1.42937	2614
NEB_ENST00000397345	0.218677	0.718288	0.063035	0.304442	0.0877573	0.288256	0.27988	2.54972	0.0672757	2570
GPR98	0.188937	0.738995	0.0720686	0.255667	0.0975224	0.381443	0.232949	2.83134	0.0776658	2567
HRNR	0.204928	0.759875	0.0351975	0.269686	0.0463201	0.171756	0.257747	3.1645	0.0364816	2557
HMCN1	0.19072	0.728667	0.0806134	0.261738	0.110631	0.42268	0.235666	2.68551	0.0876818	2543
MYD88	0.00751582	0.988133	0.00435127	0.00760608	0.00440352	0.578947	0.00757274	83.2667	0.00437028	2528
Q9Y6V0-3	0.185823	0.725671	0.0885062	0.256071	0.121965	0.476293	0.228234	2.64526	0.0971002	2497
XIRP2	0.201293	0.72312	0.0755861	0.278368	0.104528	0.375502	0.252024	2.61168	0.0817665	2474
ZNF717	0.129652	0.764417	0.10593	0.169609	0.138577	0.817035	0.148966	3.24479	0.118481	2445
RYR3	0.258529	0.683518	0.0579531	0.378232	0.0847865	0.224165	0.34867	2.15974	0.0615183	2433
NEB	0.214818	0.724752	0.0604305	0.296402	0.0833809	0.28131	0.27359	2.63308	0.0643172	2416
RET	0.227575	0.75	0.0224252	0.303433	0.0299003	0.0985401	0.294624	3	0.0229397	2408
IDH2	0.0241265	0.962146	0.0137271	0.0250757	0.0142672	0.568966	0.0247229	25.4176	0.0139182	2404
ZFHX3	0.224073	0.620575	0.155352	0.361074	0.250336	0.693309	0.288782	1.63557	0.183925	2401
ZNF717_ENST00000400845	0.130526	0.768421	0.101053	0.169863	0.131507	0.774194	0.150121	3.31818	0.112412	2375
NEB_ENST00000427231	0.221239	0.716814	0.0619469	0.308642	0.0864198	0.28	0.284091	2.53125	0.0660377	2373
ABCA13	0.214377	0.71887	0.0667522	0.298214	0.0928571	0.311377	0.272876	2.55708	0.0715268	2337
ABCA13_ENST00000435803	0.214041	0.718322	0.067637	0.297974	0.0941597	0.316	0.272331	2.55015	0.0725436	2336
LRP2	0.216774	0.716559	0.0666667	0.302521	0.0930372	0.30754	0.276771	2.52807	0.0714286	2325
SPTA1	0.220405	0.715024	0.0645717	0.308248	0.090307	0.292969	0.282717	2.50906	0.069029	2323
DNAH9	0.228176	0.713915	0.0579084	0.319613	0.0811138	0.253788	0.295633	2.49547	0.0614679	2314
ZFHX4_ENST00000050961	0.236395	0.692207	0.0713975	0.341509	0.103145	0.302026	0.309578	2.24894	0.076887	2297
FBXW7	0.0218055	0.769734	0.208461	0.0283286	0.270822	9.56	0.0222916	3.3428	0.263361	2293
GNAS	0.0187773	0.970742	0.0104803	0.0193432	0.0107962	0.55814	0.0191366	33.1791	0.0105914	2290
ABL1	0.0613228	0.904512	0.0341656	0.0677966	0.0377724	0.557143	0.065329	9.47248	0.0353741	2283
NF1_ENST00000358273	0.155417	0.49778	0.346803	0.312221	0.696699	2.23143	0.184017	0.991158	0.530931	2252
AKAP13	0.330505	0.640464	0.0290308	0.516039	0.0453278	0.0878378	0.493662	1.78137	0.0298988	2239
PKHD1L1	0.18815	0.753053	0.0587969	0.24985	0.0780781	0.3125	0.231755	3.04945	0.06247	2211
AKAP13_ENST00000394518	0.335952	0.639094	0.0249538	0.525669	0.0390456	0.0742779	0.505915	1.77081	0.0255924	2164
HRAS	0.0544693	0.939013	0.00651769	0.0580069	0.006941	0.119658	0.0576071	15.3969	0.00656045	2148
ATM_ENST00000278616	0.0684676	0.718211	0.213321	0.0953307	0.297017	3.11565	0.0735	2.54876	0.271166	2147
CREBBP	0.109756	0.67167	0.218574	0.163408	0.325419	1.99145	0.123288	2.04571	0.279712	2132
PDGFRA	0.0953052	0.866667	0.0380282	0.109967	0.0438787	0.399015	0.105345	6.5	0.0395315	2130
CSMD2	0.269394	0.692525	0.0380818	0.389002	0.0549898	0.141361	0.368726	2.25229	0.0395894	2127
PLEC	0.31855	0.634239	0.0472103	0.502256	0.0744361	0.148204	0.46746	1.73403	0.0495495	2097
DNAH8	0.189189	0.721525	0.0892857	0.262207	0.123746	0.471939	0.233333	2.59099	0.0980392	2072
DNAH8_ENST00000359357	0.191787	0.718841	0.089372	0.266801	0.124328	0.465995	0.237298	2.5567	0.0981432	2070
PKHD1	0.246728	0.69365	0.0596219	0.355695	0.0859539	0.24165	0.327542	2.26424	0.0634021	2063
OBSCN_ENST00000359599	0.277559	0.672736	0.0497047	0.412582	0.0738844	0.179078	0.384196	2.05564	0.0523045	2032
PTPRT	0.173314	0.745446	0.0812408	0.232497	0.108983	0.46875	0.209649	2.92843	0.0884244	2031
PTPRD	0.157008	0.779099	0.063893	0.201526	0.0820089	0.40694	0.186251	3.52691	0.068254	2019
PLEC_ENST00000436759	0.327543	0.624318	0.048139	0.524642	0.0771065	0.14697	0.487085	1.66182	0.0505735	2015
AHNAK	0.279185	0.671138	0.0496771	0.415988	0.0740192	0.177936	0.387319	2.04079	0.0522739	2013
DNAH7	0.195098	0.705353	0.0995498	0.276596	0.141135	0.510256	0.242387	2.39389	0.110556	1999
CSMD2_ENST00000373381	0.271537	0.69068	0.0377834	0.393144	0.0547046	0.139147	0.372752	2.2329	0.039267	1985
SMAD4	0.0302877	0.694599	0.275114	0.0436047	0.396076	9.08333	0.0312337	2.27438	0.379526	1981
DNAH11	0.21638	0.695147	0.0884732	0.311273	0.127273	0.408879	0.276129	2.28027	0.0970605	1978
BRCA2	0.102134	0.681402	0.216463	0.149888	0.317673	2.1194	0.113752	2.13876	0.276265	1968
LOC652153	0.23335	0.715302	0.0513472	0.326226	0.0717839	0.220044	0.304377	2.5125	0.0541265	1967
DNAH3	0.270408	0.663776	0.0658163	0.407379	0.0991545	0.243396	0.370629	1.9742	0.0704533	1960
DNAH3_ENST00000261383	0.271143	0.662737	0.0661199	0.409126	0.099768	0.243856	0.372011	1.96505	0.0708013	1951
PLEC_ENST00000345136	0.329224	0.62301	0.0477658	0.528442	0.0766694	0.145086	0.490812	1.65259	0.0501618	1947
HYDIN_ENST00000316490	0.235416	0.712442	0.0521425	0.330435	0.0731884	0.221491	0.3079	2.47756	0.0550109	1937
ERBB2	0.0664935	0.907532	0.025974	0.0732685	0.0286205	0.390625	0.0712298	9.81461	0.0266667	1925
SYNE2	0.191767	0.702449	0.105784	0.272997	0.150593	0.55163	0.237266	2.36077	0.118298	1919
PTPRD_ENST00000381196	0.159162	0.776963	0.0638743	0.204852	0.0822102	0.401316	0.18929	3.48357	0.0682327	1910
PBRM1	0.174961	0.354636	0.470403	0.493353	1.32644	2.68862	0.212063	0.549513	0.888229	1909
HERC2	0.261993	0.665788	0.0722193	0.393508	0.108472	0.275654	0.355	1.99211	0.0778409	1897
ATRX	0.0680739	0.601583	0.330343	0.113158	0.549123	4.85271	0.0730464	1.50993	0.493302	1895
FMN2	0.296453	0.654844	0.048703	0.452708	0.0743735	0.164286	0.421369	1.89724	0.0511964	1889
PLEC_ENST00000354958	0.335638	0.617553	0.0468085	0.543497	0.0757967	0.139461	0.505204	1.61474	0.0491071	1880
RELN	0.226375	0.708489	0.0651361	0.319518	0.0919367	0.287736	0.292616	2.4304	0.0696745	1873
DMD_ENST00000378677	0.183541	0.708175	0.108284	0.259174	0.152905	0.589971	0.224801	2.42672	0.121433	1847
GRIN2A	0.20684	0.736699	0.0564604	0.280766	0.0766396	0.272966	0.26078	2.79794	0.0598389	1842
ANK3	0.21841	0.690087	0.0915033	0.316496	0.132597	0.418953	0.279443	2.22671	0.100719	1836
PLEC_ENST00000354589	0.340984	0.616393	0.042623	0.553191	0.0691489	0.125	0.517413	1.60684	0.0445205	1830
ALK	0.150902	0.804265	0.0448332	0.187627	0.0557444	0.297101	0.177721	4.10894	0.0469376	1829
RP1L1	0.213034	0.72782	0.0591457	0.292701	0.0812641	0.277635	0.270703	2.67404	0.0628638	1826
DMD_ENST00000378687	0.180869	0.712479	0.106652	0.253858	0.149691	0.589666	0.220805	2.47801	0.119385	1819
PLEC_ENST00000356346	0.339217	0.617761	0.0430226	0.549107	0.0696429	0.126829	0.513356	1.61616	0.0449568	1813
SPEN	0.162147	0.662424	0.175429	0.244779	0.264829	1.08191	0.193527	1.9623	0.212752	1807
ANK2	0.212222	0.721111	0.0666667	0.294299	0.0924499	0.314136	0.269394	2.58566	0.0714286	1800
COL6A3	0.297267	0.659788	0.0429448	0.450549	0.0650888	0.144465	0.423016	1.93934	0.0448718	1793
DNAH17	0.32249	0.627594	0.0499159	0.513852	0.0795353	0.154783	0.475993	1.68524	0.0525384	1783
NOTCH2	0.125705	0.680947	0.193348	0.184603	0.28394	1.53812	0.143778	2.13428	0.239693	1774
ERBB4	0.122738	0.796946	0.0803167	0.15401	0.100781	0.654378	0.13991	3.92479	0.0873309	1768
DNAH10_ENST00000409039	0.250709	0.680091	0.0692002	0.368641	0.101751	0.276018	0.334595	2.12589	0.0743449	1763
CUBN	0.240888	0.699317	0.059795	0.344463	0.0855049	0.248227	0.317329	2.32576	0.0635978	1756
DST_ENST00000370769	0.18187	0.715507	0.102623	0.254183	0.143426	0.564263	0.2223	2.51503	0.114358	1754
PTPRT_ENST00000373184	0.183219	0.732877	0.0839041	0.25	0.114486	0.457944	0.224319	2.74359	0.0915888	1752
POLE	0.112765	0.832284	0.0549513	0.135488	0.0660248	0.48731	0.127097	4.96246	0.0581466	1747
AHNAK_ENST00000378024	0.299017	0.658762	0.0422209	0.453907	0.0640913	0.141199	0.426568	1.93051	0.0440821	1729
FAT2	0.258309	0.655394	0.0862974	0.394128	0.131673	0.334086	0.34827	1.90186	0.094448	1715
PCDH15	0.206796	0.716462	0.0767428	0.288635	0.107114	0.371105	0.260709	2.52686	0.0831218	1707
IGFN1_ENST00000335211	0.209507	0.755869	0.0346244	0.277174	0.0458075	0.165266	0.265033	3.09615	0.0358663	1704
PBRM1_ENST00000296302	0.201646	0.377425	0.420929	0.534268	1.11526	2.08746	0.252577	0.606232	0.726904	1701
DMD_ENST00000357033	0.183481	0.707965	0.108555	0.259167	0.153333	0.59164	0.224711	2.42424	0.121774	1695
CACNA1E	0.257988	0.682249	0.0597633	0.378144	0.0875976	0.231651	0.347687	2.14711	0.063562	1690
EP300	0.0804734	0.708284	0.211243	0.113617	0.298246	2.625	0.0875161	2.42799	0.267817	1690
DSCAM	0.293665	0.648313	0.0580225	0.452968	0.0894977	0.197581	0.415759	1.84343	0.0615965	1689
PCDH15_ENST00000417177	0.208062	0.715471	0.0764671	0.290804	0.106877	0.367521	0.262725	2.51458	0.0827985	1687
PDE4DIP	0.168252	0.753864	0.0778835	0.223186	0.103312	0.462898	0.202287	3.0628	0.0844616	1682
BRCA2_ENST00000544455	0.113962	0.693317	0.192721	0.164372	0.277969	1.6911	0.12862	2.2607	0.238729	1676
SMARCA4	0.122608	0.690191	0.187201	0.177643	0.271231	1.52683	0.139741	2.2278	0.230316	1672
DNAH2	0.239445	0.689385	0.0711701	0.347332	0.103237	0.297229	0.31483	2.21942	0.0766234	1658
KCNJ12	0.251969	0.738946	0.0090854	0.340984	0.0122951	0.0360577	0.336842	2.83063	0.0091687	1651
KMT2A	0.164034	0.676185	0.159781	0.242588	0.236298	0.974074	0.196221	2.08818	0.190166	1646
LRP1	0.277643	0.647631	0.0747266	0.428705	0.115385	0.269147	0.384357	1.83793	0.0807617	1646
COL11A1	0.162691	0.761468	0.075841	0.213655	0.0995984	0.466165	0.194302	3.19231	0.0820649	1635
HERC2_ENST00000261609	0.275841	0.651988	0.0721713	0.423077	0.110694	0.261641	0.380912	1.87346	0.0777851	1635
RP1	0.18076	0.749387	0.0698529	0.24121	0.0932134	0.386441	0.220643	2.99022	0.0750988	1632
ATRX_ENST00000373344	0.0754601	0.617791	0.306748	0.122145	0.496524	4.06504	0.0816191	1.61637	0.442478	1630
PBRM1_ENST00000356770	0.208717	0.370166	0.421117	0.563847	1.13765	2.01765	0.26377	0.587719	0.727466	1629
PLEC_ENST00000357649	0.33703	0.616143	0.0468269	0.547	0.076	0.13894	0.508364	1.60514	0.0491273	1623
LAMA1	0.25709	0.693588	0.0493218	0.370667	0.0711111	0.191847	0.346058	2.26358	0.0518807	1622
RB1	0.0357583	0.345253	0.618989	0.103571	1.79286	17.3103	0.0370844	0.527307	1.6246	1622
RNF213_ENST00000411702	0.282622	0.662956	0.0544218	0.426306	0.0820896	0.19256	0.393966	1.96697	0.057554	1617
CSMD1_ENST00000539096	0.278505	0.672897	0.0485981	0.413889	0.0722222	0.174497	0.38601	2.05714	0.0510806	1605
SETD2_ENST00000409792	0.0637102	0.568395	0.367895	0.112088	0.647253	5.77451	0.0680454	1.31693	0.582016	1601
TNXB_ENST00000375247	0.264706	0.691489	0.0438048	0.382805	0.0633484	0.165485	0.36	2.24138	0.0458115	1598
CARD11	0.183584	0.75	0.066416	0.244779	0.0885547	0.361775	0.224866	3	0.0711409	1596
COL11A1_ENST00000370096	0.162907	0.755639	0.0814536	0.215589	0.107794	0.5	0.194611	3.09231	0.0886767	1596
RUNX1	0.037594	0.545113	0.417293	0.0689655	0.765517	11.1	0.0390625	1.19835	0.716129	1596
DNAH11_ENST00000328843	0.219006	0.700441	0.0805538	0.312668	0.115004	0.367816	0.280419	2.33824	0.0876112	1589
HLA-A	0.221172	0.68305	0.0957782	0.323801	0.140221	0.433048	0.283981	2.15507	0.105923	1587
DNAH17_ENST00000389840	0.335016	0.617035	0.0479495	0.542945	0.0777096	0.143126	0.503795	1.6112	0.0503645	1585
ROS1	0.132111	0.783818	0.0840708	0.168548	0.107258	0.636364	0.152221	3.62573	0.0917874	1582
MDN1	0.188488	0.71537	0.0961417	0.263484	0.134394	0.510067	0.232268	2.51333	0.106368	1581
MLL_ENST00000534358	0.164661	0.675111	0.160228	0.243902	0.237336	0.973077	0.197119	2.07797	0.190799	1579
MAGEC1	0.190235	0.77045	0.0393152	0.246914	0.0510288	0.206667	0.234926	3.35635	0.0409241	1577
CACNA1E_ENST00000367573	0.254627	0.683472	0.0619017	0.372549	0.0905696	0.243108	0.34161	2.15927	0.0659864	1567
SETD2	0.0580728	0.569879	0.372049	0.101904	0.652856	6.40659	0.0616531	1.32493	0.59248	1567
PKHD1_ENST00000340994	0.255754	0.68798	0.056266	0.371747	0.0817844	0.22	0.343643	2.20492	0.0596206	1564
LAMA2	0.208707	0.697183	0.0941101	0.299357	0.134986	0.45092	0.263754	2.30233	0.103887	1562
MTOR	0.134443	0.81114	0.0544174	0.165746	0.0670876	0.404762	0.155325	4.29492	0.0575491	1562
TNXB_ENST00000375244	0.264272	0.692752	0.0429763	0.381481	0.062037	0.162621	0.359198	2.2547	0.0449062	1559
MXRA5	0.254814	0.698973	0.0462131	0.364555	0.0661157	0.18136	0.341947	2.32196	0.0484522	1558
MXRA5_ENST00000381114	0.257253	0.696325	0.0464217	0.369444	0.0666667	0.180451	0.346354	2.29299	0.0486815	1551
SACS	0.182699	0.698515	0.118786	0.261553	0.170055	0.650177	0.223539	2.31692	0.134799	1549
VCAN	0.215173	0.716808	0.0680183	0.300182	0.0948905	0.316109	0.274167	2.53118	0.0729825	1529
CDC27	0.191099	0.731021	0.0778796	0.261415	0.106535	0.407534	0.236246	2.71776	0.0844571	1528
CDC27_ENST00000531206	0.190633	0.73219	0.0771768	0.26036	0.105405	0.404844	0.235534	2.73399	0.0836312	1516
FLG2	0.242564	0.681428	0.0760079	0.355965	0.111542	0.313351	0.320244	2.139	0.0822604	1513
BCLAF1_ENST00000531224	0.222222	0.736111	0.0416667	0.301887	0.0566038	0.1875	0.285714	2.78947	0.0434783	1512
PAPPA2	0.223031	0.706817	0.0701522	0.315543	0.0992509	0.31454	0.287053	2.41084	0.0754448	1511
FRAS1_ENST00000264895	0.242545	0.690524	0.0669317	0.351248	0.096929	0.275956	0.32021	2.23126	0.071733	1509
PCDH15_ENST00000414778	0.209085	0.715431	0.0754843	0.29225	0.105509	0.361022	0.264358	2.51408	0.0816474	1497
NCOR1	0.108652	0.669349	0.221999	0.162325	0.331663	2.04321	0.121896	2.02434	0.285345	1491
DNAH8_ENST00000449981	0.210349	0.702285	0.0873656	0.299522	0.124402	0.415335	0.266383	2.35892	0.095729	1488
FBN2_ENST00000508053	0.227303	0.704102	0.0685945	0.322827	0.0974212	0.301775	0.294169	2.37955	0.0736462	1487
SACS_ENST00000382298	0.189644	0.691997	0.118359	0.274052	0.17104	0.624113	0.234025	2.24672	0.134249	1487
NSD1	0.281965	0.615747	0.102288	0.457923	0.16612	0.362768	0.39269	1.60245	0.113943	1486
ARID2	0.0788941	0.523938	0.397168	0.150579	0.758044	5.03419	0.0856515	1.10057	0.658837	1483
MACF1_ENST00000361689	0.186015	0.71351	0.100475	0.260704	0.140818	0.540146	0.228524	2.49052	0.111698	1473
NSD1_ENST00000439151	0.283775	0.614392	0.101833	0.461878	0.165746	0.358852	0.396209	1.59331	0.113379	1473
PTPRD_ENST00000355233	0.156929	0.774457	0.0686141	0.202632	0.0885965	0.437229	0.18614	3.43373	0.0736689	1472
FBN2	0.22541	0.709016	0.0655738	0.317919	0.0924855	0.290909	0.291005	2.43662	0.0701754	1464
FRAS1	0.242445	0.692995	0.0645604	0.349851	0.0931615	0.266289	0.320036	2.25727	0.0690162	1456
KCNJ5	0.0460165	0.947802	0.00618132	0.0485507	0.00652174	0.134328	0.0482361	18.1579	0.00621977	1456
KDM6A	0.125687	0.463599	0.410714	0.271111	0.885926	3.26776	0.143755	0.864277	0.69697	1456
ROS1_ENST00000368507	0.131868	0.785714	0.0824176	0.167832	0.104895	0.625	0.151899	3.66667	0.0898204	1456
SI	0.153476	0.753613	0.0929112	0.203653	0.123288	0.605381	0.181301	3.05866	0.102428	1453
BCOR	0.190771	0.492424	0.316804	0.387413	0.643357	1.66065	0.235745	0.970149	0.46371	1452
ZNF536	0.267218	0.69697	0.0358127	0.383399	0.0513834	0.134021	0.364662	2.3	0.0371429	1452
PTCH1	0.133103	0.55931	0.307586	0.237978	0.549938	2.31088	0.15354	1.26917	0.444223	1450
HSPG2	0.294686	0.657695	0.047619	0.448059	0.0724029	0.161593	0.417808	1.92137	0.05	1449
DCHS2	0.237569	0.700276	0.0621547	0.33925	0.0887574	0.261628	0.311594	2.33641	0.0662739	1448
EP400	0.372917	0.56875	0.0583333	0.655678	0.102564	0.156425	0.594684	1.31884	0.0619469	1440
MACF1	0.178596	0.720639	0.100764	0.24783	0.139826	0.564202	0.217428	2.5796	0.112056	1439
TRRAP	0.289199	0.675261	0.0355401	0.428277	0.0526316	0.122892	0.406863	2.0794	0.0368497	1435
CDH1	0.0662483	0.459554	0.474198	0.144158	1.03187	7.15789	0.0709485	0.850323	0.901857	1434
CMYA5_ENST00000446378	0.220363	0.700139	0.0794979	0.314741	0.113546	0.360759	0.282648	2.33488	0.0863636	1434
DST_ENST00000244364	0.191742	0.69909	0.109167	0.274274	0.156156	0.569343	0.237229	2.32326	0.122545	1429
UBR4	0.247546	0.685133	0.0673212	0.36131	0.09826	0.271955	0.328984	2.17595	0.0721805	1426
PTPRD_ENST00000346816	0.157193	0.773333	0.0694737	0.203267	0.0898367	0.441964	0.186511	3.41176	0.0746606	1425
SMARCA4_ENST00000358026	0.137737	0.719606	0.142656	0.191406	0.198242	1.03571	0.159739	2.56642	0.166393	1423
TG	0.229796	0.708363	0.0618412	0.324405	0.0873016	0.269113	0.298358	2.42892	0.0659176	1423
FBXW7_ENST00000281708	0.0344585	0.727145	0.238397	0.0473888	0.327853	6.91837	0.0356883	2.66495	0.313019	1422
CEBPA	0.0295567	0.47924	0.491203	0.061674	1.02496	16.619	0.0304569	0.92027	0.965422	1421
FAM135B	0.223944	0.735211	0.0408451	0.304598	0.0555556	0.18239	0.288566	2.7766	0.0425844	1420
LOC51059	0.223944	0.735211	0.0408451	0.304598	0.0555556	0.18239	0.288566	2.7766	0.0425844	1420
SDK1	0.284507	0.673944	0.0415493	0.422153	0.061651	0.14604	0.397638	2.06695	0.0433505	1420
NAV3	0.17618	0.744186	0.0796335	0.236742	0.107008	0.452	0.213858	2.90909	0.0865237	1419
MET	0.167137	0.772214	0.0606488	0.216438	0.0785388	0.362869	0.200677	3.39009	0.0645646	1418
PTPRD_ENST00000537002	0.158528	0.772824	0.0686483	0.205128	0.0888278	0.433036	0.188394	3.40187	0.0737082	1413
ATR	0.141335	0.720881	0.137784	0.196059	0.191133	0.974874	0.164599	2.5827	0.159802	1408
FLNC	0.288352	0.678267	0.0333807	0.425131	0.0492147	0.115764	0.40519	2.10817	0.0345334	1408
TRRAP_ENST00000359863	0.287749	0.675926	0.0363248	0.425711	0.0537408	0.126238	0.404	2.08571	0.037694	1404
UNC13C	0.199572	0.707056	0.0933713	0.282258	0.132056	0.467857	0.249332	2.41363	0.102987	1403
KDR	0.141227	0.785307	0.0734665	0.179837	0.0935513	0.520202	0.164452	3.65781	0.0792918	1402
ODZ3	0.244269	0.706304	0.0494269	0.345842	0.0699797	0.202346	0.323223	2.40488	0.051997	1396
SVEP1	0.224928	0.729943	0.0451289	0.308145	0.0618253	0.200637	0.290203	2.70292	0.0472618	1396
NOTCH3	0.167025	0.723297	0.109677	0.230922	0.151635	0.656652	0.200516	2.61399	0.123188	1395
SRSF2	0.156272	0.814337	0.0293907	0.191901	0.0360915	0.188073	0.185217	4.3861	0.0302806	1395
MYO18B	0.25486	0.694744	0.050396	0.366839	0.0725389	0.19774	0.342029	2.27594	0.0530705	1389
PEG3	0.221902	0.721902	0.056196	0.307385	0.0778443	0.253247	0.285185	2.59585	0.059542	1388
LAMA5	0.307138	0.653929	0.0389329	0.46968	0.0595369	0.126761	0.443288	1.88958	0.0405101	1387
EYS_ENST00000370621	0.169553	0.752525	0.0779221	0.225312	0.103547	0.459574	0.20417	3.04082	0.084507	1386
TCHH	0.170274	0.781385	0.0483405	0.217913	0.0618652	0.283898	0.205217	3.57426	0.0507961	1386
ZIM2_ENST00000326441	0.221418	0.722142	0.0564399	0.306613	0.0781563	0.254902	0.284387	2.59896	0.059816	1382
KIAA1109	0.185642	0.73314	0.0812183	0.253215	0.110781	0.4375	0.227961	2.74728	0.0883978	1379
FREM2	0.238026	0.706821	0.0551524	0.336756	0.0780287	0.231707	0.312381	2.41089	0.0583717	1378
PTPRD_ENST00000397617	0.159652	0.770682	0.0696662	0.207156	0.0903955	0.436364	0.189983	3.36076	0.074883	1378
GPR112	0.228758	0.712418	0.0588235	0.321101	0.0825688	0.257143	0.29661	2.47727	0.0625	1377
NRXN1_ENST00000406316	0.252723	0.672476	0.0748003	0.37581	0.111231	0.295977	0.338192	2.05322	0.0808477	1377
WT1	0.0983248	0.378004	0.523671	0.260116	1.38536	5.32593	0.109047	0.607728	1.09939	1373
UNC13C_ENST00000260323	0.196793	0.712099	0.0911079	0.276356	0.127943	0.462963	0.245009	2.47342	0.100241	1372
HLA-A_ENST00000376806	0.215901	0.68636	0.0977389	0.314559	0.142402	0.452703	0.275349	2.18837	0.108327	1371
PREX2	0.221736	0.719912	0.0583516	0.308004	0.0810537	0.263158	0.284911	2.57031	0.0619675	1371
VPS13B	0.215901	0.690007	0.0940919	0.312896	0.136364	0.435811	0.275349	2.22588	0.103865	1371
SPHKAP_ENST00000392056	0.215801	0.735918	0.0482809	0.293241	0.0656064	0.223729	0.275187	2.7867	0.0507302	1367
NRXN1_ENST00000536085	0.24451	0.682284	0.0732064	0.358369	0.107296	0.299401	0.323643	2.14747	0.0789889	1366
VPS13B_ENST00000357162	0.21978	0.682784	0.0974359	0.321888	0.142704	0.443333	0.28169	2.15242	0.107955	1365
ZAN_ENST00000542585	0.265441	0.675735	0.0588235	0.392818	0.0870511	0.221607	0.361361	2.0839	0.0625	1360
ASXL1_ENST00000306058	0.150846	0.448124	0.40103	0.336617	0.89491	2.65854	0.177643	0.812	0.669533	1359
COL22A1	0.225166	0.715232	0.0596026	0.314815	0.0833333	0.264706	0.290598	2.51163	0.0633803	1359
PTPN11	0.0544518	0.927152	0.0183959	0.0587302	0.0198413	0.337838	0.0575875	12.7273	0.0187406	1359
SPHKAP	0.214128	0.738043	0.0478293	0.29013	0.0648056	0.223368	0.272472	2.81742	0.0502318	1359
FBXW7_NM_018315_2	0.0397937	0.731761	0.228445	0.0543807	0.312185	5.74074	0.0414428	2.72802	0.296084	1357
AR	0.10643	0.833703	0.059867	0.12766	0.0718085	0.5625	0.119107	5.01333	0.0636792	1353
ERBB4_ENST00000402597	0.135255	0.776792	0.0879527	0.17412	0.113225	0.650273	0.15641	3.48013	0.0964344	1353
BAI3	0.214497	0.721154	0.0643491	0.297436	0.0892308	0.3	0.27307	2.58621	0.0687747	1352
NOTCH3_ENST00000263388	0.16543	0.724036	0.110534	0.228484	0.152664	0.668161	0.198222	2.62366	0.12427	1348
ARID1B	0.152303	0.653789	0.193908	0.232955	0.296591	1.27317	0.179667	1.88841	0.240553	1346
DYNC1H1	0.245536	0.683036	0.0714286	0.359477	0.104575	0.290909	0.325444	2.15493	0.0769231	1344
ODZ1	0.232143	0.708333	0.0595238	0.327731	0.0840336	0.25641	0.302326	2.42857	0.0632911	1344
FBN3	0.279226	0.661951	0.0588235	0.421822	0.0888639	0.210667	0.387397	1.95815	0.0625	1343
SETBP1	0.217424	0.738645	0.0439315	0.294355	0.0594758	0.202055	0.277831	2.82621	0.0459502	1343
UNC79	0.224627	0.700746	0.0746269	0.320554	0.106496	0.332226	0.289702	2.34165	0.0806452	1340
SCN10A	0.284006	0.663677	0.0523169	0.427928	0.0788288	0.184211	0.39666	1.97333	0.055205	1338
MYH2	0.260479	0.685629	0.0538922	0.379913	0.0786026	0.206897	0.352227	2.18095	0.056962	1336
MYO15A	0.291168	0.667665	0.0411677	0.436099	0.0616592	0.141388	0.410771	2.00901	0.0429352	1336
BIRC6	0.164168	0.73913	0.0967016	0.22211	0.130832	0.589041	0.196413	2.83333	0.107054	1334
CIC	0.115529	0.664666	0.219805	0.173815	0.3307	1.9026	0.130619	1.9821	0.281731	1333
COL12A1	0.185296	0.726182	0.0885221	0.255165	0.121901	0.477733	0.22744	2.65205	0.0971193	1333
TAF1L	0.247183	0.67994	0.0728775	0.363536	0.107182	0.294833	0.328343	2.12441	0.0786062	1331
MYH1	0.242081	0.702112	0.0558069	0.344791	0.0794844	0.23053	0.319403	2.35696	0.0591054	1326
NBEA	0.180714	0.722855	0.0964313	0.25	0.133403	0.533613	0.220575	2.60822	0.106723	1317
BIRC6_ENST00000421745	0.165653	0.740122	0.0942249	0.223819	0.12731	0.568807	0.198543	2.84795	0.104027	1316
CMYA5	0.21145	0.708397	0.0801527	0.298491	0.113147	0.379061	0.268151	2.42932	0.0871369	1310
CDH23	0.284186	0.688312	0.0275019	0.412875	0.0399556	0.0967742	0.397012	2.20833	0.0282797	1309
C1orf173	0.20107	0.736239	0.0626911	0.273105	0.0851506	0.311787	0.251675	2.7913	0.0668842	1308
MKI67	0.222222	0.685957	0.091821	0.32396	0.133858	0.413194	0.285714	2.18428	0.101105	1296
MGAM_ENST00000475668	0.266409	0.685714	0.0478764	0.388514	0.0698198	0.17971	0.363158	2.18182	0.0502839	1295
KIAA1409	0.218702	0.710974	0.0703246	0.307609	0.098913	0.321555	0.279921	2.45989	0.0756442	1294
DCC	0.221964	0.694509	0.0835267	0.319599	0.120267	0.376307	0.285288	2.27342	0.0911392	1293
EZH2	0.0440835	0.828306	0.12761	0.0532213	0.154062	2.89474	0.0461165	4.82432	0.146277	1293
KALRN_ENST00000360013	0.260634	0.673627	0.0657386	0.386912	0.097589	0.252226	0.35251	2.06398	0.0703642	1293
TSC2	0.152595	0.651433	0.195972	0.234245	0.300832	1.28426	0.180073	1.86889	0.243738	1291
NRXN1_ENST00000404971	0.24373	0.682602	0.0736677	0.357061	0.107922	0.302251	0.32228	2.15062	0.0795262	1276
PCDH15_ENST00000395438	0.222745	0.703529	0.0737255	0.316611	0.104794	0.330986	0.286579	2.37302	0.0795936	1275
ASPM	0.193093	0.708006	0.0989011	0.272727	0.13969	0.512195	0.2393	2.42473	0.109756	1274
SPEG	0.247634	0.657729	0.0946372	0.376499	0.143885	0.382166	0.32914	1.92166	0.10453	1268
EPHA3	0.154028	0.758294	0.0876777	0.203125	0.115625	0.569231	0.182073	3.13725	0.0961039	1266
C15orf2	0.263658	0.70863	0.0277118	0.372067	0.0391061	0.105105	0.358065	2.43207	0.0285016	1263
CNTNAP2	0.229183	0.714512	0.0563045	0.320755	0.0788013	0.245675	0.297325	2.50278	0.0596639	1261
HLA-DRB1	0.142176	0.817315	0.0405083	0.173955	0.0495627	0.284916	0.165741	4.47391	0.0422185	1259
ODZ2_ENST00000518659	0.278441	0.686555	0.035004	0.405562	0.0509849	0.125714	0.385888	2.19036	0.0362737	1257
PRUNE2_ENST00000376718	0.210819	0.735879	0.0533015	0.286486	0.0724324	0.25283	0.267137	2.78614	0.0563025	1257
FBXW7_ENST00000296555	0.0302548	0.734076	0.235669	0.0412148	0.321041	7.78947	0.0311987	2.76048	0.308333	1256
UBR4_ENST00000375267	0.252389	0.688694	0.0589172	0.366474	0.0855491	0.233438	0.337593	2.21228	0.0626058	1256
FBXW7_ENST00000534231	0.028	0.7496	0.2224	0.0373533	0.296692	7.94286	0.0288066	2.99361	0.286008	1250
STAB2	0.26	0.6792	0.0608	0.382803	0.0895171	0.233846	0.351351	2.11721	0.0647359	1250
PLXNA4_ENST00000321063	0.28743	0.681345	0.031225	0.421857	0.0458284	0.108635	0.403371	2.13819	0.0322314	1249
VWF	0.278846	0.668269	0.0528846	0.417266	0.0791367	0.189655	0.386667	2.01449	0.0558376	1248
ZNF831	0.242181	0.667201	0.0906175	0.362981	0.135817	0.374172	0.319577	2.00482	0.0996473	1247
NF2	0.0274194	0.251613	0.720968	0.108974	2.86538	26.2941	0.0281924	0.336207	2.58382	1240
MYCBP2_ENST00000357337	0.191593	0.712207	0.0962005	0.269012	0.135074	0.50211	0.237	2.47472	0.10644	1237
PXDNL_ENST00000356297	0.233198	0.711741	0.0550607	0.327645	0.0773606	0.236111	0.304118	2.4691	0.0582691	1235
ACAN	0.246353	0.722853	0.0307942	0.340807	0.0426009	0.125	0.326882	2.60819	0.0317726	1234
AKAP9	0.181524	0.67423	0.144246	0.269231	0.213942	0.794643	0.221782	2.06965	0.168561	1234
NOTCH4	0.202593	0.727715	0.0696921	0.278396	0.0957684	0.344	0.254065	2.67262	0.0749129	1234
BSN	0.238443	0.712895	0.0486618	0.334471	0.0682594	0.204082	0.313099	2.48305	0.0511509	1233
BCOR_ENST00000378444	0.218344	0.520292	0.261364	0.419657	0.50234	1.19703	0.279335	1.0846	0.353846	1232
ENSG00000121031	0.232331	0.637693	0.129976	0.364331	0.203822	0.559441	0.302646	1.76009	0.149393	1231
EPHA5	0.141809	0.773431	0.0847596	0.183351	0.109589	0.597701	0.165242	3.41367	0.0926091	1227
DOCK2	0.244082	0.70449	0.0514286	0.346466	0.0730012	0.210702	0.322894	2.38398	0.0542169	1225
PLXNA4_ENST00000359827	0.292245	0.680816	0.0269388	0.429257	0.0395683	0.0921788	0.412918	2.13299	0.0276846	1225
CNTNAP5	0.247954	0.678396	0.0736498	0.365501	0.108565	0.29703	0.329706	2.10941	0.0795053	1222
SCN5A	0.300327	0.653028	0.0466448	0.4599	0.0714286	0.155313	0.42924	1.88208	0.048927	1222
DSPP	0.45045	0.536446	0.013104	0.839695	0.0244275	0.0290909	0.819672	1.15724	0.013278	1221
ODZ4	0.259623	0.69697	0.043407	0.372503	0.0622797	0.167192	0.350664	2.3	0.0453767	1221
STAG2	0.0671581	0.479934	0.452907	0.139932	0.943686	6.7439	0.071993	0.922835	0.827844	1221
AKAP9_ENST00000356239	0.185246	0.672131	0.142623	0.27561	0.212195	0.769912	0.227364	2.05	0.166348	1220
COL5A1	0.277276	0.66612	0.0566038	0.416256	0.0849754	0.204142	0.383655	1.99509	0.06	1219
MPL	0.0525021	0.924528	0.0229696	0.0567879	0.0248447	0.4375	0.0554113	12.25	0.0235097	1219
CACNA1C	0.315271	0.63711	0.047619	0.494845	0.0747423	0.151042	0.460432	1.75566	0.05	1218
HUWE1	0.209532	0.746919	0.0435497	0.280528	0.0583058	0.207843	0.265073	2.9513	0.0455326	1217
SCN1A	0.239113	0.68447	0.0764174	0.34934	0.111645	0.319588	0.314255	2.16927	0.0827402	1217
ANKRD11	0.236214	0.690535	0.073251	0.342074	0.106079	0.310105	0.309267	2.23138	0.0790409	1215
DNAH1_ENST00000420323	0.269136	0.692181	0.0386831	0.388823	0.0558859	0.143731	0.368243	2.24866	0.0402397	1215
CDKN2A_ENST00000446177	0.0495458	0.464079	0.486375	0.106762	1.04804	9.81667	0.0521286	0.865948	0.946945	1211
HERC1	0.215702	0.698347	0.0859504	0.308876	0.123077	0.398467	0.275026	2.31507	0.0940325	1210
EP400_ENST00000333577	0.380795	0.561258	0.057947	0.678466	0.103245	0.152174	0.614973	1.27925	0.0615114	1208
BAP1	0.046396	0.489644	0.46396	0.0947547	0.947547	10	0.0486533	0.959416	0.865533	1207
ANKRD30A	0.218439	0.722591	0.0589701	0.302299	0.0816092	0.269962	0.27949	2.60479	0.0626655	1204
MGA	0.127288	0.614809	0.257903	0.207037	0.419486	2.02614	0.145853	1.59611	0.347534	1202
HUWE1_ENST00000342160	0.22	0.735833	0.0441667	0.298981	0.0600227	0.200758	0.282051	2.78549	0.0462075	1200
MYCBP2_ENST00000407578	0.1925	0.716667	0.0908333	0.268605	0.126744	0.471861	0.23839	2.52941	0.0999083	1200
POLE_ENST00000320574	0.151793	0.774812	0.0733945	0.19591	0.0947255	0.483516	0.178958	3.44074	0.0792079	1199
C12orf51	0.243108	0.674185	0.0827068	0.360595	0.122677	0.340206	0.321192	2.06923	0.0901639	1197
ODZ4_ENST00000278550	0.258145	0.700919	0.0409357	0.368296	0.0584029	0.158576	0.347973	2.34358	0.0426829	1197
AGC1	0.243719	0.723618	0.0326633	0.336806	0.0451389	0.134021	0.322259	2.61818	0.0337662	1194
MYH4	0.252931	0.685092	0.0619765	0.369193	0.0904645	0.245033	0.338565	2.17553	0.0660714	1194
NCOR1_ENST00000395851	0.117253	0.671692	0.211055	0.174564	0.314214	1.8	0.132827	2.04592	0.267516	1194
DNAH10_same_name	0.273261	0.672255	0.0544845	0.406484	0.0810474	0.199387	0.376009	2.05115	0.0576241	1193
HERC1_ENST00000443617	0.212427	0.701092	0.0864819	0.302994	0.123353	0.407115	0.269723	2.34551	0.0946691	1191
MGAM_ENST00000473011	0.254408	0.693535	0.0520571	0.366828	0.0750605	0.20462	0.341216	2.26301	0.0549159	1191
ANKRD36_ENST00000420699	0.101681	0.867227	0.0310924	0.117248	0.0358527	0.305785	0.11319	6.53165	0.0320902	1190
DNAH1	0.267902	0.693345	0.0387532	0.386391	0.0558931	0.144654	0.365938	2.26099	0.0403155	1187
PIK3CG	0.20893	0.744735	0.0463353	0.280543	0.0622172	0.221774	0.264111	2.91749	0.0485866	1187
CACNA1C_ENST00000344100	0.309444	0.641653	0.0489039	0.48226	0.0762155	0.158038	0.448107	1.79059	0.0514184	1186
NALCN	0.231872	0.697302	0.0708263	0.332527	0.101572	0.305455	0.301866	2.30362	0.076225	1186
ABCA12	0.211993	0.711149	0.0768581	0.2981	0.108076	0.36255	0.269025	2.46199	0.0832571	1184
TECTA	0.317836	0.624683	0.057481	0.508796	0.0920162	0.180851	0.465923	1.66441	0.0609865	1183
THSD7B	0.191885	0.721893	0.0862215	0.265808	0.119438	0.449339	0.237448	2.59574	0.0943571	1183
NRXN1_ENST00000402717	0.247039	0.681895	0.071066	0.362283	0.104218	0.287671	0.32809	2.14362	0.0765027	1182
ODZ2	0.278577	0.685859	0.0355631	0.406173	0.0518519	0.12766	0.38615	2.18329	0.0368745	1181
ADAMTS12	0.2324	0.716709	0.0508906	0.32426	0.0710059	0.218978	0.302762	2.52994	0.0536193	1179
TNR	0.278202	0.665818	0.0559796	0.417834	0.0840764	0.20122	0.385429	1.99239	0.0592992	1179
DMBT1_ENST00000368915	0.24469	0.696686	0.0586236	0.35122	0.0841463	0.239583	0.32396	2.29692	0.0622744	1177
MYH8	0.271259	0.671769	0.0569728	0.403797	0.0848101	0.210031	0.372229	2.04663	0.0604148	1176
CACNA1E_ENST00000367567	0.261277	0.691064	0.0476596	0.378079	0.0689655	0.18241	0.353687	2.23691	0.0500447	1175
LPA	0.265532	0.667234	0.067234	0.397959	0.100765	0.253205	0.36153	2.00512	0.0720803	1175
MACF1_ENST00000317713	0.186542	0.711244	0.102215	0.262275	0.143713	0.547945	0.229319	2.46313	0.113852	1174
MGAM_ENST00000549489	0.254266	0.693686	0.0520478	0.366544	0.0750308	0.204698	0.340961	2.26462	0.0549055	1172
LRRK2	0.18275	0.714774	0.102477	0.255675	0.143369	0.560748	0.223615	2.50599	0.114177	1171
PCNT	0.229256	0.725406	0.0453379	0.316038	0.0625	0.197761	0.297447	2.64174	0.047491	1169
C12orf51_ENST00000377560	0.241438	0.679795	0.0787671	0.355164	0.115869	0.326241	0.318284	2.12299	0.0855019	1168
MED12_ENST00000374080	0.126821	0.798629	0.0745501	0.158798	0.0933476	0.587838	0.14524	3.96596	0.0805556	1167
UBR4_ENST00000375217	0.247856	0.691252	0.0608919	0.358561	0.0880893	0.245675	0.329532	2.23889	0.0648402	1166
TENM1	0.250216	0.691976	0.0578085	0.361596	0.0835411	0.231034	0.333717	2.2465	0.0613553	1159
DICER1	0.103717	0.811582	0.0847018	0.127796	0.104366	0.816667	0.115718	4.30734	0.0925401	1157
DMBT1_ENST00000368909	0.24308	0.699827	0.0570934	0.347342	0.0815822	0.234875	0.321143	2.33141	0.0605505	1156
DNMT3A_ENST00000380746	0.119377	0.715398	0.165225	0.166868	0.230955	1.38406	0.13556	2.51368	0.197927	1156
RNF213	0.280277	0.66609	0.0536332	0.420779	0.0805195	0.191358	0.389423	1.99482	0.0566728	1156
PTPRS	0.206087	0.721739	0.0721739	0.285542	0.1	0.350211	0.259584	2.59375	0.0777882	1150
SCN5A_ENST00000333535	0.303742	0.651001	0.0452567	0.466578	0.0695187	0.148997	0.43625	1.86534	0.047402	1149
PCDH17	0.321429	0.640244	0.0383275	0.502041	0.0598639	0.119241	0.473684	1.77966	0.0398551	1148
ERBB3	0.0993897	0.847428	0.0531822	0.117284	0.0627572	0.535088	0.110358	5.55429	0.0561694	1147
CDKN2A_ENST00000498124	0.0506108	0.475567	0.473822	0.106422	0.99633	9.36207	0.0533088	0.906822	0.900498	1146
ZNF208_ENST00000397126	0.203316	0.765271	0.0314136	0.265678	0.041049	0.154506	0.255203	3.26022	0.0324324	1146
LRRK2_ENST00000298910	0.180385	0.717163	0.102452	0.251526	0.142857	0.567961	0.220085	2.5356	0.114146	1142
SCN5A_ENST00000413689	0.304729	0.649737	0.0455342	0.469003	0.0700809	0.149425	0.438287	1.855	0.0477064	1142
UNC13C_ENST00000545554	0.198774	0.718914	0.0823117	0.276492	0.114495	0.414097	0.248087	2.55763	0.0896947	1142
DSP	0.247152	0.676599	0.0762489	0.365285	0.112694	0.308511	0.328289	2.09214	0.0825427	1141
ZNF208	0.202454	0.766871	0.0306748	0.264	0.04	0.151515	0.253846	3.28947	0.0316456	1141
DMD_ENST00000378682	0.173684	0.718421	0.107895	0.241758	0.150183	0.621212	0.210191	2.5514	0.120944	1140
MYH7	0.296491	0.646491	0.0570175	0.458616	0.0881954	0.192308	0.421446	1.82878	0.0604651	1140
RB1_ENST00000267163	0.0456942	0.337434	0.616872	0.135417	1.82813	13.5	0.0478821	0.509284	1.61009	1138
ARID1B_ENST00000346085	0.15493	0.666373	0.178697	0.232497	0.268164	1.15341	0.183333	1.99736	0.217578	1136
JAK1	0.268486	0.559859	0.171655	0.47956	0.306604	0.639344	0.367028	1.272	0.207226	1136
DNAH6	0.18326	0.736564	0.0801762	0.248804	0.108852	0.4375	0.22438	2.79599	0.0871648	1135
DSCAML1	0.301587	0.660494	0.0379189	0.456609	0.0574099	0.125731	0.431818	1.94545	0.0394134	1134
NAV3_ENST00000397909	0.176367	0.749559	0.0740741	0.235294	0.0988235	0.42	0.214133	2.99296	0.08	1134
FBN1	0.217123	0.720212	0.0626655	0.301471	0.0870098	0.288618	0.277339	2.57413	0.066855	1133
ZNF208_ENST00000428290	0.203001	0.766108	0.0308914	0.264977	0.0403226	0.152174	0.254707	3.27547	0.0318761	1133
HLA-B	0.160035	0.738285	0.10168	0.216766	0.137725	0.635359	0.190526	2.82095	0.113189	1131
PKD1L1	0.250221	0.681698	0.0680813	0.367056	0.0998703	0.272085	0.333726	2.14167	0.073055	1131
DYSF	0.284574	0.637411	0.0780142	0.446453	0.122392	0.274143	0.39777	1.75795	0.0846154	1128
PRDM9	0.203901	0.728723	0.0673759	0.279805	0.0924574	0.330435	0.256125	2.68627	0.0722433	1128
CACNA1C_ENST00000399617	0.31677	0.63709	0.0461402	0.497214	0.0724234	0.145658	0.463636	1.7555	0.0483721	1127
COL7A1	0.207815	0.71492	0.0772647	0.290683	0.108075	0.371795	0.262332	2.50779	0.0837344	1126
AKT1	0.0488889	0.943111	0.008	0.0518379	0.00848256	0.163636	0.0514019	16.5781	0.00806452	1125
BRCA1	0.118327	0.709964	0.171708	0.166667	0.241855	1.45113	0.134208	2.44785	0.207304	1124
DCHS1	0.231523	0.702582	0.0658949	0.329531	0.0937896	0.284615	0.301275	2.36228	0.0705434	1123
DIDO1	0.251113	0.653606	0.0952805	0.384196	0.145777	0.379433	0.335315	1.88689	0.105315	1123
SCN1A_ENST00000303395	0.240427	0.682102	0.0774711	0.35248	0.113577	0.322222	0.31653	2.14566	0.0839768	1123
TET1_ENST00000373644	0.150758	0.750223	0.0990187	0.200951	0.131986	0.656805	0.177521	3.00357	0.109901	1121
COL6A6	0.225893	0.704464	0.0696429	0.320659	0.0988593	0.3083	0.291811	2.38369	0.074856	1120
GLI3	0.274352	0.675603	0.0500447	0.406085	0.0740741	0.18241	0.378079	2.08264	0.0526811	1119
KDM6A_ENST00000377967	0.142985	0.470956	0.386059	0.303605	0.819734	2.7	0.16684	0.890203	0.628821	1119
ODZ2_ENST00000519204	0.281753	0.686047	0.0322004	0.410691	0.0469361	0.114286	0.392279	2.18519	0.0332717	1118
PABPC1	0.0849732	0.846154	0.068873	0.100423	0.0813953	0.810526	0.0928641	5.5	0.0739673	1118
VPS13D	0.242397	0.698569	0.059034	0.346991	0.084507	0.243542	0.319953	2.31751	0.0627376	1118
THSD7B_ENST00000413152	0.189068	0.722222	0.0887097	0.261787	0.122829	0.469194	0.233149	2.6	0.0973451	1116
CACNA1B	0.298293	0.667565	0.034142	0.446837	0.051144	0.114458	0.425096	2.00811	0.0353488	1113
CACNA1C_ENST00000347598	0.315647	0.633993	0.0503597	0.497872	0.0794326	0.159544	0.461235	1.73219	0.0530303	1112
SRCAP	0.196942	0.677158	0.125899	0.290837	0.185923	0.639269	0.245241	2.09749	0.144033	1112
KDM6A_ENST00000382899	0.147615	0.467147	0.385239	0.315992	0.824663	2.60976	0.173178	0.876689	0.626647	1111
RET_ENST00000340058	0.459046	0.506751	0.0342034	0.905861	0.0674956	0.0745098	0.848586	1.02737	0.0354147	1111
TRIO	0.247964	0.663348	0.0886878	0.373806	0.133697	0.357664	0.329723	1.97043	0.0973188	1105
ENSG00000174501	0.131341	0.794384	0.0742754	0.165336	0.0935006	0.565517	0.151199	3.86344	0.0802348	1104
DMBT1	0.244787	0.697189	0.0580236	0.351105	0.083225	0.237037	0.32413	2.3024	0.0615977	1103
ASTN1	0.259528	0.692377	0.0480944	0.374836	0.0694626	0.185315	0.35049	2.25074	0.0505243	1102
LAMA3	0.231818	0.721818	0.0463636	0.321159	0.0642317	0.2	0.301775	2.59477	0.0486177	1100
MSH6	0.117808	0.583562	0.29863	0.201878	0.511737	2.53488	0.13354	1.40132	0.425781	1095
MYH13	0.284932	0.647489	0.0675799	0.440056	0.104372	0.237179	0.398467	1.83679	0.072478	1095
BCORL1	0.158135	0.605119	0.236746	0.261329	0.391239	1.49711	0.187839	1.53241	0.31018	1094
MYH13_ENST00000252172	0.284799	0.648352	0.0668498	0.439266	0.103107	0.234727	0.398207	1.84375	0.0716389	1092
FLT4_ENST00000261937	0.24473	0.672777	0.0824931	0.36376	0.122616	0.337079	0.324029	2.05602	0.0899101	1091
CELSR1	0.307339	0.626606	0.066055	0.490483	0.105417	0.214925	0.443709	1.67813	0.0707269	1090
HECW1	0.277064	0.670642	0.0522936	0.413133	0.0779754	0.188742	0.383249	2.03621	0.0551791	1090
CACNA1H_ENST00000358590	0.292011	0.639118	0.0688705	0.456897	0.107759	0.235849	0.412451	1.77099	0.0739645	1089
DYSF_ENST00000410020	0.291093	0.631772	0.077135	0.460756	0.122093	0.264984	0.410622	1.71571	0.0835821	1089
TRIOBP_ENST00000344404	0.22865	0.699725	0.0716253	0.326772	0.102362	0.313253	0.296429	2.33028	0.0771513	1089
ADAMTS20_ENST00000389420	0.194112	0.724931	0.0809568	0.267766	0.111675	0.417062	0.240868	2.63545	0.0880881	1087
LYST	0.210672	0.708372	0.0809568	0.297403	0.114286	0.384279	0.2669	2.42902	0.0880881	1087
TMEM132D	0.26151	0.675875	0.0626151	0.386921	0.0926431	0.239437	0.354115	2.08523	0.0667976	1086
USP34	0.199078	0.709677	0.0912442	0.280519	0.128571	0.458333	0.248562	2.44444	0.100406	1085
ESR1	0.0940959	0.871771	0.0341328	0.107937	0.0391534	0.362745	0.10387	6.79856	0.0353391	1084
GATA3	0.0987996	0.356417	0.544783	0.277202	1.5285	5.51402	0.109631	0.553802	1.19675	1083
PABPC3	0.144044	0.713758	0.142198	0.201811	0.199224	0.987179	0.168285	2.49355	0.16577	1083
Q13209_HUMAN	0.167283	0.701479	0.131238	0.238472	0.187088	0.78453	0.200888	2.34985	0.151064	1082
PDZD2	0.232192	0.692877	0.0749306	0.335113	0.108144	0.322709	0.30241	2.25602	0.081	1081
LRRC7	0.225926	0.708333	0.0657407	0.318954	0.0928105	0.290984	0.291866	2.42857	0.0703667	1080
UNC80_ENST00000439458	0.196478	0.735867	0.0676552	0.267003	0.0919395	0.34434	0.244521	2.78596	0.0725646	1079
CACNA1A_ENST00000357018	0.286642	0.639147	0.0742115	0.448476	0.11611	0.2589	0.401821	1.77121	0.0801603	1078
RNF43	0.0539535	0.431628	0.514419	0.125	1.19181	9.53448	0.0570305	0.759411	1.05939	1075
ADCY8	0.281192	0.679702	0.0391061	0.413699	0.0575342	0.139073	0.391192	2.12209	0.0406977	1074
CACNA1H	0.293296	0.639665	0.0670391	0.458515	0.104803	0.228571	0.41502	1.77519	0.0718563	1074
COL6A5	0.221601	0.691806	0.0865922	0.320323	0.125168	0.390756	0.284689	2.24471	0.0948012	1074
SCN11A	0.217877	0.703911	0.0782123	0.309524	0.111111	0.358974	0.278571	2.37736	0.0848485	1074
C20orf80	0.131653	0.810458	0.0578898	0.162442	0.0714286	0.439716	0.151613	4.27586	0.061447	1071
FGFR2	0.0793651	0.878618	0.0420168	0.0903294	0.0478215	0.529412	0.0862069	7.23846	0.0438596	1071
FRG1B	0.131776	0.81028	0.0579439	0.16263	0.071511	0.439716	0.151776	4.27094	0.0615079	1070
OR4C3	0.120674	0.842844	0.0364827	0.143174	0.0432852	0.302326	0.137234	5.3631	0.0378641	1069
CTNND2	0.302064	0.639775	0.0581614	0.472141	0.0909091	0.192547	0.432796	1.77604	0.061753	1066
GNAQ	0.0412758	0.910882	0.0478424	0.0453141	0.0525232	1.15909	0.0430528	10.2211	0.0502463	1066
HEATR7B2	0.244841	0.675422	0.0797373	0.3625	0.118056	0.32567	0.324224	2.08092	0.0866463	1066
EPHA7	0.161626	0.761815	0.0765595	0.212159	0.100496	0.473684	0.192785	3.19841	0.0829069	1058
ANKRD36	0.108798	0.855251	0.0359508	0.127212	0.0420354	0.330435	0.122081	5.9085	0.0372915	1057
F5	0.230114	0.712121	0.0577652	0.323138	0.081117	0.251029	0.298893	2.47368	0.0613065	1056
PTCH1_ENST00000430669	0.181818	0.61553	0.202652	0.295385	0.329231	1.11458	0.222222	1.60099	0.254157	1056
CELSR3	0.267299	0.663507	0.0691943	0.402857	0.104286	0.258865	0.364812	1.97183	0.0743381	1055
DNAH14_ENST00000430092	0.182938	0.711848	0.105213	0.256991	0.147803	0.57513	0.223898	2.47039	0.117585	1055
CACNA1E_ENST00000357570	0.236243	0.689753	0.0740038	0.342503	0.10729	0.313253	0.309317	2.22324	0.079918	1054
FRY	0.239089	0.687856	0.073055	0.347586	0.106207	0.305556	0.314214	2.20365	0.0788127	1054
CDH10	0.18251	0.721483	0.0960076	0.252964	0.13307	0.526042	0.223256	2.59044	0.106204	1052
PTPRS_ENST00000372412	0.206667	0.720952	0.072381	0.286658	0.100396	0.35023	0.260504	2.58362	0.0780287	1050
ZNF804A	0.167619	0.770476	0.0619048	0.217553	0.0803461	0.369318	0.201373	3.35685	0.0659898	1050
ASXL3_ENST00000269197	0.207817	0.723546	0.0686368	0.28722	0.0948617	0.330275	0.262335	2.61724	0.073695	1049
MYO3A	0.203051	0.708294	0.0886559	0.286676	0.125168	0.43662	0.254785	2.4281	0.0972803	1049
ADAMTS20	0.198473	0.719466	0.0820611	0.275862	0.114058	0.413462	0.247619	2.56463	0.0893971	1048
CACNA1A	0.286533	0.642789	0.0706781	0.445765	0.109955	0.246667	0.401606	1.79947	0.0760534	1047
CACNA1C_ENST00000399634	0.320917	0.630372	0.0487106	0.509091	0.0772727	0.151786	0.472574	1.70543	0.0512048	1047
UTRN	0.207259	0.702006	0.0907354	0.295238	0.129252	0.437788	0.261446	2.35577	0.0997899	1047
PTPRB_ENST00000334414	0.255747	0.675287	0.0689655	0.378723	0.102128	0.269663	0.343629	2.07965	0.0740741	1044
WDFY4	0.257663	0.697318	0.0450192	0.369505	0.0645604	0.174721	0.347097	2.3038	0.0471414	1044
FAM123B_ENST00000330258	0.117929	0.612656	0.269415	0.192488	0.43975	2.28455	0.133696	1.58168	0.368766	1043
NCOR2_ENST00000405201	0.30489	0.603068	0.0920422	0.505564	0.152623	0.301887	0.438621	1.51932	0.101373	1043
SCN1A_ENST00000423058	0.25024	0.675935	0.0738255	0.370213	0.10922	0.295019	0.33376	2.0858	0.0797101	1043
LINC00273	0.117083	0.845489	0.037428	0.138479	0.0442679	0.319672	0.132609	5.47205	0.0388833	1042
LINC00273_ENST00000539813	0.117083	0.845489	0.037428	0.138479	0.0442679	0.319672	0.132609	5.47205	0.0388833	1042
SALL1	0.25072	0.707973	0.0413064	0.354138	0.0583446	0.164751	0.334615	2.42434	0.0430862	1041
TEX15	0.180943	0.718961	0.100096	0.251673	0.139224	0.553191	0.220917	2.55822	0.11123	1039
FLT4	0.245902	0.670203	0.0838959	0.366906	0.12518	0.341176	0.326087	2.03216	0.0915789	1037
ZNF804B	0.190154	0.732625	0.0772201	0.259552	0.105402	0.406091	0.234803	2.74007	0.083682	1036
IGSF10	0.194203	0.742029	0.0637681	0.261719	0.0859375	0.328358	0.241007	2.8764	0.0681115	1035
GRIN2B	0.304642	0.649903	0.0454545	0.46875	0.0699405	0.149206	0.438108	1.85635	0.047619	1034
PCDH10	0.267892	0.643133	0.0889749	0.416541	0.138346	0.33213	0.365918	1.80217	0.0976645	1034
TENM2	0.28364	0.687318	0.0290416	0.412676	0.0422535	0.102389	0.395946	2.19814	0.0299103	1033
TGFBR2	0.0717054	0.511628	0.416667	0.140152	0.814394	5.81081	0.0772443	1.04762	0.714286	1032
WDFY3	0.214147	0.699612	0.0862403	0.306094	0.123269	0.402715	0.272503	2.32903	0.0943796	1032
COL6A6_ENST00000358511	0.226214	0.706796	0.0669903	0.320055	0.0947802	0.296137	0.292346	2.4106	0.0718002	1030
ATP10A	0.282799	0.667638	0.0495627	0.423581	0.0742358	0.175258	0.394309	2.00877	0.0521472	1029
KEAP1	0.101167	0.755837	0.142996	0.133848	0.189189	1.41346	0.112554	3.09562	0.166856	1028
LCT	0.268482	0.682879	0.0486381	0.393162	0.0712251	0.181159	0.367021	2.15337	0.0511247	1028
PIK3R1	0.0565854	0.677073	0.266341	0.0835735	0.393372	4.7069	0.0599793	2.09668	0.363032	1025
PTCH1_ENST00000331920	0.173659	0.60878	0.217561	0.285256	0.357372	1.25281	0.210153	1.55611	0.278055	1025
SRRM2	0.251953	0.688477	0.0595703	0.365957	0.0865248	0.236434	0.336815	2.21003	0.0633437	1024
ADAMTS16_ENST00000274181	0.241447	0.697947	0.0606061	0.345938	0.0868347	0.251012	0.318299	2.31068	0.0645161	1023
FNDC1	0.256109	0.702835	0.0410557	0.364395	0.0584145	0.160305	0.344284	2.36513	0.0428135	1023
PKD1	0.268817	0.705767	0.0254154	0.380886	0.0360111	0.0945455	0.367647	2.39867	0.0260782	1023
TNC	0.290196	0.662745	0.0470588	0.43787	0.0710059	0.162162	0.40884	1.96512	0.0493827	1020
MLL4	0.197252	0.618253	0.184495	0.319048	0.298413	0.935323	0.245721	1.61954	0.226233	1019
TRPM6	0.206084	0.733072	0.060844	0.281124	0.0829987	0.295238	0.25958	2.74632	0.0647858	1019
TSC2_ENST00000219476	0.186457	0.686948	0.126595	0.271429	0.184286	0.678947	0.229192	2.19436	0.144944	1019
CACNA1A_ENST00000360228	0.285855	0.642436	0.0717092	0.444954	0.111621	0.250859	0.400275	1.7967	0.0772487	1018
FREM1	0.283186	0.66175	0.0550639	0.427935	0.0832095	0.194444	0.395062	1.9564	0.0582726	1017
JAK3	0.127953	0.776575	0.0954724	0.164766	0.12294	0.746154	0.146727	3.47577	0.10555	1016
MYO16	0.227362	0.705709	0.0669291	0.322176	0.0948396	0.294372	0.294268	2.39799	0.07173	1016
SCN9A	0.223425	0.700787	0.0757874	0.31882	0.108146	0.339207	0.287706	2.34211	0.0820021	1016
TACC2	0.260827	0.679134	0.0600394	0.384058	0.0884058	0.230189	0.352863	2.11656	0.0638743	1016
RIMS2_ENST00000436393	0.207882	0.698522	0.0935961	0.297602	0.133992	0.450237	0.262438	2.31699	0.103261	1015
CACNA1A_ENST00000325084	0.299112	0.620928	0.0799605	0.481717	0.128776	0.267327	0.426761	1.63802	0.0869099	1013
PTCH1_ENST00000375274	0.181639	0.618954	0.199408	0.293461	0.322169	1.09783	0.221954	1.62435	0.249075	1013
ROBO2_ENST00000487694	0.185771	0.666996	0.147233	0.278519	0.220741	0.792553	0.228155	2.00297	0.172654	1012
FLNB	0.301288	0.639247	0.0594648	0.471318	0.0930233	0.197368	0.431206	1.77198	0.0632244	1009
HECW1_ENST00000395891	0.278494	0.667988	0.0535183	0.416914	0.0801187	0.192171	0.385989	2.01194	0.0565445	1009
NTRK3	0.191468	0.759921	0.0486111	0.251958	0.0639687	0.253886	0.23681	3.16529	0.0510949	1008
RIMS2	0.206349	0.697421	0.0962302	0.295875	0.13798	0.466346	0.26	2.30492	0.106476	1008
ZDBF2	0.179563	0.683532	0.136905	0.2627	0.20029	0.762431	0.218863	2.15987	0.158621	1008
ANKRD30A_ENST00000602533	0.22145	0.725919	0.0526316	0.305062	0.0725034	0.237668	0.284439	2.64855	0.0555556	1007
NCKAP5	0.225646	0.734592	0.0397614	0.307172	0.0541272	0.176211	0.291399	2.76779	0.0414079	1006
LPHN3_ENST00000514591	0.246246	0.698699	0.0550551	0.352436	0.0787966	0.223577	0.326693	2.31894	0.0582627	999
FER1L6	0.247495	0.678357	0.0741483	0.364845	0.109306	0.299595	0.328895	2.10903	0.0800866	998
RIMS2_ENST00000406091	0.211055	0.693467	0.0954774	0.304348	0.137681	0.452381	0.267516	2.2623	0.105556	995
VPS13C	0.170854	0.724623	0.104523	0.235784	0.144244	0.611765	0.206061	2.63139	0.116723	995
CACNA1H_ENST00000348261	0.292757	0.637827	0.0694165	0.458991	0.108833	0.237113	0.41394	1.76111	0.0745946	994
ANK1	0.29003	0.666667	0.0433031	0.435045	0.0649547	0.149306	0.408511	2	0.0452632	993
EPHB1	0.198381	0.751012	0.0506073	0.264151	0.0673854	0.255102	0.247475	3.01626	0.0533049	988
FAM186A_ENST00000327337	0.212551	0.736842	0.0506073	0.288462	0.0686813	0.238095	0.269923	2.8	0.0533049	988
NBEA_ENST00000400445	0.173077	0.727733	0.0991903	0.23783	0.1363	0.573099	0.209302	2.67286	0.110112	988
CHD6	0.227964	0.700101	0.0719352	0.325615	0.10275	0.315556	0.295276	2.33446	0.0775109	987
FAM5C	0.204661	0.720365	0.0749747	0.284107	0.104079	0.366337	0.257325	2.57609	0.0810515	987
MYH6	0.28934	0.664975	0.0456853	0.435115	0.0687023	0.157895	0.407143	1.98485	0.0478723	985
CUX2	0.364191	0.598169	0.0376399	0.608844	0.0629252	0.103352	0.5728	1.48861	0.0391121	983
MAP3K1_ENST00000399503	0.0854527	0.53001	0.384537	0.161228	0.725528	4.5	0.0934372	1.12771	0.624793	983
ACACB	0.276986	0.675153	0.0478615	0.410256	0.0708899	0.172794	0.383099	2.07837	0.0502674	982
FLT1	0.161914	0.760692	0.0773931	0.212851	0.10174	0.477987	0.193196	3.17872	0.0838852	982
SPTB	0.281059	0.667006	0.0519348	0.421374	0.0778626	0.184783	0.390935	2.00306	0.0547798	982
TET2_ENST00000305737	0.0713558	0.41998	0.508665	0.169903	1.21117	7.12857	0.0768386	0.724077	1.03527	981
CELSR2	0.260204	0.695918	0.0438776	0.3739	0.0630499	0.168627	0.351724	2.28859	0.0458911	980
SCN2A_ENST00000375437	0.242331	0.691207	0.0664622	0.350592	0.0961538	0.274262	0.319838	2.23841	0.0711939	978
ABCA4	0.277949	0.654359	0.0676923	0.424765	0.103448	0.243542	0.384943	1.89318	0.0726073	975
ADAMTS18	0.233539	0.677984	0.0884774	0.344461	0.130501	0.378855	0.304698	2.10543	0.0970655	972
ZNF469	0.20679	0.722222	0.0709877	0.286325	0.0982906	0.343284	0.2607	2.6	0.076412	972
ZDBF2_ENST00000374423	0.184346	0.704428	0.111226	0.261696	0.157895	0.603352	0.22601	2.38328	0.125145	971
PRIC285	0.317526	0.630928	0.0515464	0.503268	0.0816993	0.162338	0.465257	1.7095	0.0543478	970
FLNA_ENST00000369850	0.292054	0.649123	0.0588235	0.449921	0.09062	0.201413	0.412536	1.85	0.0625	969
H3F3A	0.00928793	0.986584	0.00412797	0.00941423	0.0041841	0.444444	0.009375	73.5385	0.00414508	969
USP6_ENST00000250066	0.151703	0.799794	0.0485036	0.189677	0.0606452	0.319728	0.178832	3.99485	0.0509761	969
EPHB1_ENST00000398015	0.199586	0.754912	0.0455016	0.264384	0.060274	0.227979	0.249354	3.08017	0.0476706	967
ERBB3_ENST00000267101	0.103413	0.856256	0.0403309	0.120773	0.0471014	0.39	0.11534	5.95683	0.0420259	967
PCDHA4_ENST00000530339	0.324017	0.649068	0.0269151	0.499203	0.0414673	0.0830671	0.479326	1.84956	0.0276596	966
CRIPAK	0.161658	0.635233	0.203109	0.254486	0.319739	1.25641	0.192831	1.74148	0.254876	965
GLI1	0.206432	0.682573	0.110996	0.302432	0.162614	0.537688	0.260131	2.15033	0.124854	964
PRG4	0.285566	0.689512	0.0249221	0.414157	0.0361446	0.0872727	0.399709	2.22074	0.0255591	963
SLIT2	0.220374	0.717256	0.0623701	0.307246	0.0869565	0.283019	0.282667	2.53676	0.0665188	962
TRANK1_ENST00000429976	0.255717	0.690229	0.0540541	0.370482	0.0783133	0.211382	0.343575	2.22819	0.0571429	962
SCN2A	0.234375	0.698958	0.0666667	0.33532	0.09538	0.284444	0.306122	2.3218	0.0714286	960
SPTBN5	0.231491	0.70073	0.0677789	0.330357	0.0967262	0.292793	0.301221	2.34146	0.0727069	959
UBR5	0.177453	0.633612	0.188935	0.280066	0.298188	1.06471	0.215736	1.72934	0.232947	958
FOXL2	0.031348	0.957158	0.0114943	0.0327511	0.0120087	0.366667	0.0323625	22.3415	0.0116279	957
MYH11	0.31139	0.6186	0.0700104	0.503378	0.113176	0.224832	0.4522	1.62192	0.0752809	957
SCN3A	0.236155	0.687565	0.07628	0.343465	0.110942	0.323009	0.309166	2.20067	0.0825792	957
SPAG17	0.198537	0.721003	0.0804598	0.275362	0.111594	0.405263	0.247718	2.58427	0.0875	957
STAG2_ENST00000218089	0.0741902	0.54232	0.38349	0.136802	0.707129	5.16901	0.0801354	1.18493	0.622034	957
CTNNA2_ENST00000466387	0.258368	0.700837	0.040795	0.368657	0.058209	0.157895	0.348378	2.34266	0.04253	956
FLNB_ENST00000490882	0.317992	0.625523	0.0564854	0.508361	0.090301	0.177632	0.466258	1.67039	0.059867	956
ROBO2	0.179916	0.697699	0.122385	0.257871	0.175412	0.680233	0.219388	2.30796	0.139452	956
HIVEP3	0.268063	0.670157	0.0617801	0.4	0.0921875	0.230469	0.366237	2.03175	0.0658482	955
PLIN4	0.355346	0.616352	0.0283019	0.576531	0.0459184	0.079646	0.55122	1.60656	0.0291262	954
COL4A1	0.239244	0.716684	0.0440714	0.333821	0.0614934	0.184211	0.314483	2.52963	0.0461032	953
PLIN4_ENST00000301286	0.358867	0.611752	0.0293809	0.586621	0.0480274	0.0818713	0.559738	1.57568	0.0302703	953
F8	0.195378	0.680672	0.12395	0.287037	0.182099	0.634409	0.24282	2.13158	0.141487	952
FN1_ENST00000354785	0.255252	0.67437	0.0703782	0.378505	0.104361	0.27572	0.342736	2.07097	0.0757062	952
MEGF8	0.278361	0.647059	0.0745798	0.430195	0.11526	0.267925	0.385735	1.83333	0.0805902	952
GNAS_ENST00000371100	0.167192	0.798107	0.0347003	0.209486	0.0434783	0.207547	0.200758	3.95312	0.0359477	951
ANK1_ENST00000265709	0.287368	0.663158	0.0494737	0.433333	0.0746032	0.172161	0.40325	1.96875	0.0520487	950
DOCK3_ENST00000266037	0.209916	0.627637	0.162447	0.334454	0.258824	0.773869	0.265688	1.68555	0.193955	948
F8_ENST00000360256	0.195148	0.681435	0.123418	0.286378	0.181115	0.632432	0.242464	2.13907	0.140794	948
DMXL2	0.15873	0.74709	0.0941799	0.212465	0.126062	0.593333	0.188679	2.95397	0.103972	945
HCN1	0.248941	0.667373	0.0836864	0.373016	0.125397	0.33617	0.331453	2.00637	0.0913295	944
NTRK3_ENST00000360948	0.202331	0.747881	0.0497881	0.270538	0.0665722	0.246073	0.253652	2.96639	0.0523969	944
ALPK2_ENST00000361673	0.197243	0.706257	0.0965005	0.279279	0.136637	0.489247	0.245707	2.40433	0.106808	943
ASTN1_ENST00000367654	0.270414	0.677625	0.0519618	0.399061	0.0766823	0.192157	0.37064	2.10197	0.0548098	943
MYH11_ENST00000396324	0.322375	0.634146	0.0434783	0.508361	0.0685619	0.134868	0.475743	1.73333	0.0454545	943
PIK3C2G	0.127389	0.789809	0.0828025	0.16129	0.104839	0.65	0.145985	3.75758	0.0902778	942
FN1	0.246546	0.678002	0.0754516	0.363636	0.111285	0.306034	0.327221	2.10561	0.0816092	941
NLRP5_ENST00000390649	0.310969	0.644302	0.0447284	0.482645	0.0694215	0.143836	0.451314	1.81138	0.0468227	939
NOS1	0.259851	0.686901	0.0532481	0.378295	0.0775194	0.204918	0.351079	2.19388	0.056243	939
CENPF	0.202559	0.688699	0.108742	0.294118	0.157895	0.536842	0.254011	2.21233	0.12201	938
CACNA1S	0.327641	0.635005	0.0373533	0.515966	0.0588235	0.114007	0.487302	1.73977	0.0388027	937
LRRIQ1_ENST00000393217	0.16222	0.691569	0.146211	0.234568	0.21142	0.901316	0.193631	2.24221	0.17125	937
TLN2	0.279616	0.665955	0.054429	0.419872	0.0817308	0.194656	0.388148	1.99361	0.0575621	937
MED12L	0.225427	0.706197	0.0683761	0.319213	0.096823	0.303318	0.291034	2.40364	0.0733945	936
STK11	0.0417112	0.551872	0.406417	0.0755814	0.736434	9.74359	0.0435268	1.2315	0.684685	935
CPAMD8	0.282655	0.643469	0.0738758	0.439268	0.114809	0.261364	0.39403	1.8048	0.0797688	934
TNRC18_ENST00000399537	0.260171	0.664882	0.0749465	0.391304	0.112721	0.288066	0.351664	1.98403	0.0810185	934
CDH9	0.207931	0.729904	0.0621651	0.284875	0.0851689	0.298969	0.262517	2.70238	0.0662857	933
THSD7A	0.224009	0.700965	0.0750268	0.319572	0.107034	0.334928	0.288674	2.34409	0.0811124	933
AMER1	0.0997854	0.577253	0.322961	0.172862	0.55948	3.23656	0.110846	1.36548	0.477021	932
Q6YL47_HUMAN	0.309013	0.637339	0.0536481	0.484848	0.0841751	0.173611	0.447205	1.7574	0.0566893	932
TRPM6_ENST00000451710	0.212446	0.729614	0.0579399	0.291176	0.0794118	0.272727	0.269755	2.69841	0.0615034	932
SDK2	0.303974	0.629431	0.0665951	0.482935	0.105802	0.219081	0.436728	1.69855	0.0713464	931
PIK3C2G_ENST00000433979	0.122581	0.790323	0.0870968	0.155102	0.110204	0.710526	0.139706	3.76923	0.0954064	930
NAV2	0.2831	0.677072	0.0398278	0.418124	0.0588235	0.140684	0.394895	2.09667	0.0414798	929
PCDHA3_ENST00000522353	0.326157	0.648009	0.0258342	0.503322	0.0398671	0.0792079	0.484026	1.84098	0.0265193	929
AKAP6	0.198276	0.713362	0.0883621	0.277946	0.123867	0.445652	0.247312	2.48872	0.0969267	928
OTOF	0.267027	0.682162	0.0508108	0.391442	0.0744849	0.190283	0.364307	2.14626	0.0535308	925
KIAA1549_ENST00000422774	0.280607	0.651138	0.0682557	0.430948	0.104825	0.243243	0.39006	1.86646	0.0732558	923
VPS13C_ENST00000395896	0.167931	0.726977	0.105092	0.230999	0.14456	0.625806	0.201823	2.6627	0.117433	923
ADAMTS16	0.239696	0.701735	0.0585683	0.341577	0.0834621	0.244344	0.315264	2.35273	0.062212	922
FLNA	0.299349	0.643167	0.0574837	0.46543	0.0893761	0.192029	0.427245	1.80243	0.0609896	922
PTPRZ1_ENST00000393386	0.204348	0.731522	0.0641304	0.279346	0.0876672	0.31383	0.256831	2.7247	0.068525	920
DNHD1	0.210011	0.734494	0.0554951	0.285926	0.0755556	0.264249	0.26584	2.76639	0.0587558	919
TSHZ3_ENST00000240587	0.304679	0.649619	0.0457018	0.469012	0.0703518	0.15	0.438185	1.85404	0.0478905	919
CACNA1D	0.262527	0.663399	0.0740741	0.395731	0.111658	0.282158	0.355982	1.97087	0.08	918
CRB1	0.237473	0.70915	0.0533769	0.334869	0.0752688	0.224771	0.311429	2.4382	0.0563867	918
RIMS1	0.185185	0.739651	0.0751634	0.250368	0.10162	0.405882	0.227273	2.841	0.0812721	918
ZNF99	0.213508	0.745098	0.0413943	0.28655	0.0555556	0.193878	0.271468	2.92308	0.0431818	918
KIAA1549_ENST00000242365	0.282443	0.648855	0.0687023	0.435294	0.105882	0.243243	0.393617	1.84783	0.0737705	917
MYCBP2	0.194111	0.704471	0.101418	0.275542	0.143963	0.522472	0.240866	2.38376	0.112864	917
PARP4	0.19193	0.779716	0.0283533	0.246154	0.0363636	0.147727	0.237517	3.5396	0.0291807	917
ASH1L	0.172867	0.708972	0.118162	0.243827	0.166667	0.683544	0.208995	2.43609	0.133995	914
ITPR1	0.234649	0.707237	0.058114	0.331783	0.0821705	0.247664	0.30659	2.41573	0.0616997	912
SCN9A_ENST00000375387	0.229167	0.698465	0.0723684	0.3281	0.103611	0.315789	0.297297	2.31636	0.0780142	912
PCDHA12	0.319429	0.653128	0.0274424	0.489076	0.0420168	0.0859107	0.469355	1.88291	0.0282167	911
RIMS2_ENST00000507740	0.20966	0.694841	0.0954995	0.301738	0.137441	0.455497	0.265278	2.27698	0.105583	911
GOLGB1	0.164835	0.718681	0.116484	0.229358	0.16208	0.706667	0.197368	2.55469	0.131841	910
COL4A4	0.207921	0.745875	0.0462046	0.278761	0.0619469	0.222222	0.2625	2.93506	0.0484429	909
PTPRB	0.261826	0.664466	0.0737074	0.39404	0.110927	0.281513	0.354694	1.98033	0.0795724	909
PCDHA13	0.351322	0.620044	0.0286344	0.566607	0.0461812	0.0815047	0.541596	1.63188	0.0294785	908
KIF26B	0.283352	0.675854	0.0407938	0.41925	0.0603589	0.143969	0.395385	2.08503	0.0425287	907
SORCS3	0.245865	0.693495	0.0606395	0.354531	0.0874404	0.246637	0.326023	2.26259	0.064554	907
TNRC18_ENST00000430969	0.255788	0.676957	0.0672547	0.37785	0.0993485	0.262931	0.343704	2.09556	0.072104	907
DLC1	0.240618	0.692053	0.0673289	0.347687	0.0972887	0.279817	0.31686	2.24731	0.0721893	906
SVIL	0.270419	0.625828	0.103753	0.432099	0.165785	0.383673	0.370651	1.67257	0.115764	906
ZNF462	0.241722	0.675497	0.0827815	0.357843	0.122549	0.342466	0.318777	2.08163	0.0902527	906
PAPPA	0.271823	0.679558	0.0486188	0.4	0.0715447	0.178862	0.373293	2.12069	0.0511034	905
PCDHA8_ENST00000531613	0.298343	0.675138	0.0265193	0.441899	0.0392799	0.0888889	0.425197	2.07823	0.0272418	905
CDKN2A_ENST00000361570	0.200221	0.64823	0.151549	0.308874	0.233788	0.756906	0.250346	1.84277	0.178618	904
CHD5_ENST00000262450	0.329646	0.620575	0.0497788	0.531194	0.0802139	0.151007	0.491749	1.63557	0.0523865	904
COL1A2	0.213496	0.744469	0.0420354	0.286776	0.0564636	0.196891	0.271449	2.91342	0.0438799	904
GOLGA6L2	0.178492	0.763858	0.0576497	0.233672	0.0754717	0.322981	0.217274	3.23474	0.0611765	902
GOLGA6L2_ENST00000567107	0.178492	0.763858	0.0576497	0.233672	0.0754717	0.322981	0.217274	3.23474	0.0611765	902
EPHA7_ENST00000369303	0.167592	0.768036	0.0643729	0.218208	0.083815	0.384106	0.201333	3.311	0.0688019	901
LPHN3	0.256382	0.685905	0.0577137	0.373786	0.0841424	0.225108	0.344776	2.18375	0.0612485	901
SHANK1	0.27414	0.677026	0.0488346	0.404918	0.0721311	0.178138	0.377676	2.09622	0.0513419	901
COL3A1	0.175556	0.752222	0.0722222	0.233383	0.0960118	0.411392	0.212938	3.03587	0.0778443	900
LPHN3_ENST00000512091	0.254444	0.687778	0.0577778	0.369952	0.0840065	0.227074	0.341282	2.20285	0.0613208	900
PAK7	0.201111	0.746667	0.0522222	0.269345	0.0699405	0.259669	0.251739	2.94737	0.0550996	900
DOCK3	0.214047	0.619844	0.166109	0.345324	0.267986	0.776042	0.27234	1.6305	0.199198	897
FAM47C	0.240803	0.70903	0.0501672	0.339623	0.0707547	0.208333	0.317181	2.43678	0.0528169	897
MEGF8_ENST00000334370	0.270903	0.657748	0.0713489	0.411864	0.108475	0.263374	0.37156	1.92182	0.0768307	897
PTPRZ1	0.207358	0.732441	0.0602007	0.283105	0.0821918	0.290323	0.261603	2.7375	0.0640569	897
WDR87	0.181717	0.725753	0.0925307	0.250384	0.127496	0.509202	0.222071	2.64634	0.101966	897
HTT	0.247768	0.691964	0.0602679	0.358065	0.0870968	0.243243	0.329377	2.24638	0.064133	896
TEP1	0.245536	0.679688	0.0747768	0.361248	0.110016	0.304545	0.325444	2.12195	0.0808203	896
TRPS1	0.251397	0.658101	0.0905028	0.382003	0.137521	0.36	0.335821	1.92484	0.0995086	895
BRCA1_ENST00000471181	0.130872	0.753915	0.115213	0.173591	0.152819	0.880342	0.150579	3.06364	0.130215	894
COL14A1	0.201342	0.724832	0.0738255	0.277778	0.101852	0.366667	0.252101	2.63415	0.0797101	894
TNN	0.251678	0.715884	0.0324385	0.351562	0.0453125	0.128889	0.336323	2.51969	0.033526	894
CHD7	0.219485	0.670773	0.109742	0.327212	0.163606	0.5	0.281205	2.03741	0.12327	893
PXDN	0.290034	0.653975	0.055991	0.443493	0.0856164	0.19305	0.408517	1.88997	0.059312	893
ADAMTSL3	0.224215	0.684978	0.0908072	0.327332	0.13257	0.405	0.289017	2.17438	0.0998767	892
ZNF521	0.234568	0.698092	0.0673401	0.336013	0.096463	0.287081	0.306452	2.31227	0.0722022	891
CBL	0.0797753	0.837079	0.0831461	0.095302	0.0993289	1.04225	0.0866911	5.13793	0.0906863	890
PCDHA6_ENST00000529310	0.312711	0.662542	0.0247469	0.471986	0.0373514	0.0791367	0.454992	1.96333	0.0253749	889
GREB1_ENST00000381486	0.288288	0.666667	0.045045	0.432432	0.0675676	0.15625	0.405063	2	0.0471698	888
NLRP3	0.306306	0.63964	0.0540541	0.478873	0.084507	0.176471	0.441558	1.775	0.0571429	888
SPEF2_ENST00000356031	0.163288	0.727477	0.109234	0.224458	0.150155	0.668966	0.195155	2.66942	0.12263	888
CSPG4	0.279594	0.676437	0.0439684	0.413333	0.065	0.157258	0.388106	2.09059	0.0459906	887
FASN	0.308906	0.633596	0.0574972	0.487544	0.0907473	0.186131	0.446982	1.72923	0.0610048	887
PCDHB7	0.34611	0.62345	0.0304397	0.555154	0.0488246	0.0879479	0.52931	1.65569	0.0313953	887
CNTN5	0.174944	0.75395	0.0711061	0.232036	0.0943114	0.406452	0.212038	3.06422	0.0765492	886
ABCA12_ENST00000389661	0.219209	0.697175	0.0836158	0.314425	0.119935	0.381443	0.280753	2.30224	0.0912454	885
KIF26B_ENST00000407071	0.282486	0.679096	0.0384181	0.415973	0.0565724	0.136	0.393701	2.1162	0.039953	885
NIPBL	0.165158	0.660633	0.174208	0.25	0.263699	1.05479	0.197832	1.94667	0.210959	884
STAB1	0.268403	0.637599	0.0939977	0.420959	0.147425	0.350211	0.366873	1.75937	0.10375	883
TRANK1	0.260476	0.689694	0.0498301	0.377668	0.0722496	0.191304	0.352221	2.22263	0.0524434	883
ROBO1_ENST00000464233	0.190909	0.705682	0.103409	0.270531	0.146538	0.541667	0.235955	2.39768	0.115336	880
ITPR3	0.29124	0.67008	0.0386803	0.434635	0.057725	0.132813	0.410915	2.03103	0.0402367	879
FAM75D4	0.220957	0.70615	0.0728929	0.312903	0.103226	0.329897	0.283626	2.4031	0.0786241	878
MAP2	0.20615	0.6959	0.0979499	0.296236	0.140753	0.475138	0.259684	2.28839	0.108586	878
POLQ	0.192483	0.692483	0.115034	0.277961	0.166118	0.597633	0.238364	2.25185	0.129987	878
FRG1	0.0753425	0.888128	0.0365297	0.0848329	0.0411311	0.484848	0.0814815	7.93878	0.0379147	876
SORL1	0.264	0.665143	0.0708571	0.396907	0.106529	0.268398	0.358696	1.98635	0.0762608	875
TRPM6_ENST00000449912	0.217391	0.721968	0.0606407	0.301109	0.0839937	0.278947	0.277778	2.59671	0.0645554	874
GRM3	0.281787	0.67354	0.0446735	0.418367	0.0663265	0.158537	0.392344	2.06316	0.0467626	873
PCDHA1_ENST00000504120	0.295533	0.674685	0.0297824	0.438031	0.0441426	0.100775	0.419512	2.07394	0.0306966	873
PTPRB_ENST00000261266	0.262615	0.670872	0.0665138	0.391453	0.0991453	0.253275	0.356143	2.03833	0.0712531	872
PCDHA4	0.335247	0.641791	0.0229621	0.522361	0.0357782	0.0684932	0.504318	1.79167	0.0235018	871
PCDHA2_ENST00000526136	0.26122	0.699655	0.0391254	0.373355	0.0559211	0.14978	0.353583	2.3295	0.0407186	869
ITPR1_ENST00000302640	0.241935	0.700461	0.0576037	0.345395	0.0822368	0.238095	0.319149	2.33846	0.0611247	868
CDH8	0.251442	0.695502	0.0530565	0.361526	0.0762852	0.211009	0.335901	2.28409	0.0560292	867
TRPM3_ENST00000423814	0.254042	0.690531	0.0554273	0.367893	0.0802676	0.218182	0.340557	2.23134	0.0586797	866
TRPS1_ENST00000395715	0.251732	0.657044	0.091224	0.383128	0.13884	0.362385	0.33642	1.91582	0.100381	866
PPP1R3A	0.176879	0.738728	0.0843931	0.239437	0.114241	0.477124	0.214888	2.82743	0.0921717	865
Q8N8K0_HUMAN	0.256647	0.692486	0.0508671	0.370618	0.0734558	0.198198	0.345257	2.25188	0.0535932	865
SCN4A	0.306358	0.665896	0.0277457	0.460069	0.0416667	0.090566	0.441667	1.99308	0.0285375	865
CD163L1	0.247972	0.672074	0.0799537	0.368966	0.118966	0.32243	0.329738	2.04947	0.0869018	863
CNTN6	0.190035	0.658169	0.151796	0.288732	0.230634	0.79878	0.234621	1.92542	0.178962	863
ROBO1_ENST00000305299	0.191415	0.705336	0.103248	0.271382	0.146382	0.539394	0.236729	2.3937	0.115136	862
CNTNAP4_ENST00000307431	0.225319	0.679443	0.0952381	0.331624	0.140171	0.42268	0.290855	2.11957	0.105263	861
LOC442444	0.242741	0.708479	0.0487805	0.342623	0.0688525	0.200957	0.320552	2.43028	0.0512821	861
SCN3A_ENST00000409101	0.226481	0.700348	0.0731707	0.323383	0.104478	0.323077	0.292793	2.33721	0.0789474	861
DOT1L	0.217442	0.725581	0.0569767	0.299679	0.0785256	0.262032	0.27786	2.64407	0.0604192	860
CTCF	0.0663562	0.520373	0.413271	0.127517	0.794183	6.22807	0.0710723	1.08495	0.704365	859
FAM75D1	0.218859	0.710128	0.0710128	0.308197	0.1	0.324468	0.280179	2.4498	0.0764411	859
CACNA1G_ENST00000359106	0.288215	0.649942	0.0618436	0.443447	0.0951526	0.214575	0.404918	1.85667	0.0659204	857
ITPR1_ENST00000357086	0.234539	0.705951	0.0595099	0.332231	0.0842975	0.253731	0.306402	2.40079	0.0632754	857
MTUS2_ENST00000431530	0.25731	0.700585	0.0421053	0.367279	0.0601002	0.163636	0.346457	2.33984	0.043956	855
RIMS2_ENST00000402998	0.195322	0.698246	0.106433	0.279732	0.152429	0.54491	0.242733	2.31395	0.11911	855
TACC2_ENST00000453444	0.270175	0.666667	0.0631579	0.405263	0.0947368	0.233766	0.370192	2	0.0674157	855
MYH9	0.277518	0.63466	0.087822	0.437269	0.138376	0.316456	0.384117	1.73718	0.0962773	854
NCOR2	0.287222	0.614302	0.098476	0.467557	0.160305	0.342857	0.402961	1.59271	0.109233	853
SLIT3	0.307151	0.650645	0.042204	0.472072	0.0648649	0.137405	0.443316	1.86242	0.0440636	853
CHD4_ENST00000309577	0.188967	0.730047	0.0809859	0.258842	0.110932	0.428571	0.232996	2.70435	0.0881226	852
SPTB_ENST00000542895	0.288732	0.658451	0.0528169	0.438503	0.0802139	0.182927	0.405941	1.92784	0.0557621	852
CDH18_ENST00000507958	0.213866	0.735605	0.0505288	0.290735	0.0686901	0.236264	0.272048	2.78222	0.0532178	851
WDR87_ENST00000447313	0.188014	0.715629	0.0963572	0.262726	0.134647	0.5125	0.231548	2.51653	0.106632	851
MYO7B	0.308235	0.642353	0.0494118	0.479853	0.0769231	0.160305	0.445578	1.79605	0.0519802	850
MDC1_ENST00000376406	0.173145	0.739694	0.0871614	0.234076	0.117834	0.503401	0.209402	2.84163	0.0954839	849
TTC40	0.253239	0.689046	0.057715	0.367521	0.0837607	0.227907	0.339117	2.21591	0.06125	849
EVPL	0.29717	0.645047	0.057783	0.460695	0.0895795	0.194444	0.422819	1.81728	0.0613267	848
MYOM2	0.268868	0.676887	0.0542453	0.397213	0.0801394	0.201754	0.367742	2.09489	0.0573566	848
MYT1L	0.291274	0.667453	0.0412736	0.436396	0.0618375	0.1417	0.410982	2.00709	0.0430504	848
CACNA1G_ENST00000354983	0.288076	0.651712	0.0602125	0.442029	0.0923913	0.209016	0.404643	1.87119	0.0640704	847
SCN7A_ENST00000409855	0.180851	0.725768	0.0933806	0.249186	0.128664	0.51634	0.220779	2.64655	0.102999	846
TSC1	0.124113	0.611111	0.264775	0.203095	0.433269	2.13333	0.1417	1.57143	0.360129	846
ABCA7	0.304142	0.653254	0.0426036	0.46558	0.0652174	0.140078	0.437075	1.88396	0.0444994	845
COL5A3	0.201183	0.72426	0.0745562	0.277778	0.102941	0.370588	0.251852	2.62661	0.0805627	845
PCNXL2	0.259479	0.670616	0.0699052	0.386926	0.10424	0.269406	0.3504	2.03597	0.0751592	844
GRM1	0.283511	0.651246	0.0652432	0.435337	0.100182	0.230126	0.395695	1.86735	0.069797	843
KIF2B	0.225386	0.730724	0.0438909	0.308442	0.0600649	0.194737	0.290965	2.71366	0.0459057	843
NBAS	0.21734	0.714964	0.067696	0.303987	0.0946844	0.311475	0.277693	2.50833	0.0726115	842
VPS13A	0.16152	0.725653	0.112827	0.222586	0.155483	0.698529	0.192635	2.64502	0.127175	842
PLCE1_ENST00000260766	0.210464	0.706302	0.0832342	0.29798	0.117845	0.39548	0.266566	2.40486	0.0907912	841
BCORL1_ENST00000303743	0.179762	0.62619	0.194048	0.287072	0.309886	1.07947	0.219158	1.67516	0.240768	840
CNTN5_ENST00000524871	0.172619	0.757143	0.0702381	0.227987	0.0927673	0.406897	0.208633	3.11765	0.0755442	840
PCDHA3	0.334524	0.641667	0.0238095	0.521336	0.0371058	0.0711744	0.502683	1.7907	0.0243902	840
MAP1B	0.244338	0.668653	0.0870083	0.365419	0.130125	0.356098	0.323344	2.01799	0.0953003	839
MEN1	0.0786651	0.451728	0.469607	0.174142	1.03958	5.9697	0.0853816	0.823913	0.885393	839
SALL3	0.324163	0.642344	0.0334928	0.504655	0.0521415	0.103321	0.479646	1.79599	0.0346535	836
GCN1L1	0.295808	0.652695	0.051497	0.453211	0.0788991	0.174089	0.420068	1.87931	0.0542929	835
HIVEP1	0.214371	0.711377	0.0742515	0.301347	0.104377	0.346369	0.272866	2.46473	0.080207	835
SPTBN4	0.243114	0.706587	0.0502994	0.344068	0.0711864	0.206897	0.321203	2.40816	0.0529634	835
USH2A_ENST00000366942	0.185629	0.750898	0.0634731	0.247209	0.0845295	0.341935	0.227941	3.01442	0.0677749	835
FAM47A	0.26259	0.688249	0.0491607	0.381533	0.0714286	0.187215	0.356098	2.20769	0.0517024	834
MYH15	0.216086	0.705882	0.0780312	0.306122	0.110544	0.361111	0.275651	2.4	0.0846354	833
TIAM1	0.277311	0.665066	0.057623	0.416968	0.0866426	0.207792	0.383721	1.98566	0.0611465	833
CDH18	0.21875	0.729567	0.0516827	0.299835	0.0708402	0.236264	0.28	2.69778	0.0544994	832
ITPR3_ENST00000374316	0.286058	0.673077	0.0408654	0.425	0.0607143	0.142857	0.400673	2.05882	0.0426065	832
TRPM3_ENST00000377110	0.246691	0.697954	0.055355	0.353448	0.0793103	0.22439	0.327476	2.31076	0.0585987	831
ANKRD30B_ENST00000358984	0.172289	0.771084	0.0566265	0.223437	0.0734375	0.328671	0.208151	3.36842	0.0600255	830
GPR158	0.215663	0.720482	0.0638554	0.299331	0.0886288	0.296089	0.274962	2.57759	0.0682111	830
NIPBL_ENST00000448238	0.171084	0.66506	0.163855	0.257246	0.246377	0.957746	0.206395	1.98561	0.195965	830
PCDHG_cluster	0.282609	0.678744	0.0386473	0.41637	0.0569395	0.136752	0.393939	2.11278	0.040201	828
SDK2_ENST00000392650	0.310386	0.621981	0.0676329	0.499029	0.108738	0.217899	0.450088	1.64537	0.0725389	828
ABCC9	0.221282	0.713422	0.0652963	0.310169	0.0915254	0.295082	0.284161	2.48945	0.0698577	827
ROBO1	0.192261	0.703748	0.10399	0.273196	0.147766	0.540881	0.238024	2.37551	0.116059	827
BOC	0.522424	0.450909	0.0266667	1.1586	0.0591398	0.0510441	1.09391	0.821192	0.0273973	825
CUX1	0.40534	0.455097	0.139563	0.890667	0.306667	0.344311	0.681633	0.835189	0.1622	824
RIMBP2	0.302184	0.650485	0.0473301	0.464552	0.0727612	0.156627	0.433043	1.86111	0.0496815	824
GRM8	0.234508	0.712029	0.0534629	0.329352	0.0750853	0.227979	0.306349	2.47257	0.0564827	823
NRXN3	0.245443	0.718104	0.036452	0.341794	0.0507614	0.148515	0.325282	2.54741	0.037831	823
SPTBN2	0.257594	0.688943	0.0534629	0.373898	0.0776014	0.207547	0.346972	2.21484	0.0564827	823
TIAM1_ENST00000286827	0.27825	0.663426	0.0583232	0.419414	0.0879121	0.209607	0.385522	1.97112	0.0619355	823
TPO	0.277035	0.670717	0.0522479	0.413043	0.0778986	0.188596	0.383193	2.0369	0.0551282	823
CSF3R	0.255474	0.582725	0.1618	0.438413	0.277662	0.633333	0.343137	1.3965	0.193033	822
MYO7B_ENST00000428314	0.310219	0.639903	0.0498783	0.484791	0.0779468	0.160784	0.449735	1.77703	0.0524968	822
NLRP4_ENST00000301295	0.299635	0.634592	0.0657734	0.472169	0.103647	0.219512	0.427826	1.73667	0.0704042	821
TBX3	0.0937881	0.62363	0.282582	0.150391	0.453125	3.01299	0.103495	1.65696	0.393888	821
C5orf42_ENST00000425232	0.158537	0.732927	0.108537	0.216306	0.148087	0.684615	0.188406	2.74429	0.121751	820
HLA-C_ENST00000383329	0.131707	0.845122	0.0231707	0.155844	0.027417	0.175926	0.151685	5.45669	0.0237203	820
CACNA1G	0.290441	0.651961	0.057598	0.445489	0.0883459	0.198312	0.409326	1.87324	0.0611183	816
CROCC	0.210784	0.741422	0.0477941	0.284298	0.0644628	0.226744	0.267081	2.8673	0.0501931	816
HNF1A	0.161765	0.60049	0.237745	0.269388	0.395918	1.4697	0.192982	1.50307	0.311897	816
ZFPM2	0.21227	0.737423	0.0503067	0.287854	0.0682196	0.236994	0.26947	2.80841	0.0529716	815
ITPR2	0.214988	0.699017	0.0859951	0.307557	0.123023	0.4	0.273865	2.32245	0.094086	814
KCNB2	0.244772	0.683887	0.0713407	0.357914	0.104317	0.291457	0.324104	2.16342	0.0768212	813
PLXNB2	0.286593	0.643296	0.0701107	0.445507	0.108987	0.244635	0.401724	1.80345	0.0753968	813
PCDH9	0.231527	0.714286	0.0541872	0.324138	0.0758621	0.234043	0.301282	2.5	0.0572917	812
CACNA1E_ENST00000358338	0.223457	0.698765	0.0777778	0.319788	0.111307	0.348066	0.287758	2.31967	0.0843373	810
MDC1	0.163164	0.754017	0.0828183	0.216393	0.109836	0.507576	0.194978	3.06533	0.0902965	809
MYO5B	0.312732	0.639061	0.0482077	0.489362	0.0754352	0.15415	0.455036	1.77055	0.0506494	809
ADAMTSL1_ENST00000380548	0.273515	0.655941	0.0705446	0.416981	0.107547	0.257919	0.376491	1.90647	0.0758988	808
AFF2	0.221535	0.725248	0.0532178	0.305461	0.0733788	0.240223	0.284579	2.63964	0.0562092	808
CACNA1I	0.264851	0.710396	0.0247525	0.372822	0.0348432	0.0934579	0.360269	2.45299	0.0253807	808
ROBO1_ENST00000495273	0.191832	0.700495	0.107673	0.273852	0.15371	0.56129	0.237366	2.33884	0.120666	808
DOT1L_ENST00000398665	0.206939	0.738538	0.0545229	0.280201	0.0738255	0.263473	0.260937	2.82464	0.0576671	807
HLA-C_ENST00000539307	0.128872	0.851301	0.0198265	0.151383	0.0232897	0.153846	0.147937	5.725	0.0202276	807
LRBA	0.210657	0.692689	0.0966543	0.304114	0.139535	0.458824	0.266876	2.25403	0.106996	807
MAGI2	0.262701	0.670384	0.0669145	0.391867	0.0998152	0.254717	0.356303	2.03383	0.0717131	807
OTOGL_ENST00000458043	0.189591	0.726146	0.0842627	0.261092	0.116041	0.444444	0.233945	2.65158	0.0920162	807
SMG1_ENST00000446231	0.263941	0.672862	0.063197	0.392265	0.0939227	0.239437	0.358586	2.05682	0.0674603	807
SORCS1	0.246592	0.687732	0.0656753	0.358559	0.0954955	0.266332	0.327303	2.20238	0.0702918	807
TRPM2	0.332094	0.605948	0.0619579	0.548057	0.102249	0.186567	0.497217	1.53774	0.0660502	807
PTCHD2	0.264268	0.682382	0.0533499	0.387273	0.0781818	0.201878	0.359191	2.14844	0.0563565	806
SZT2_ENST00000562955	0.226087	0.704348	0.0695652	0.320988	0.0987654	0.307692	0.292135	2.38235	0.0747664	805
TRPM3	0.239752	0.709317	0.0509317	0.338004	0.0718039	0.212435	0.315359	2.44017	0.0536649	805
DMXL1	0.190299	0.715174	0.0945274	0.266087	0.132174	0.496732	0.235023	2.51092	0.104396	804
MYLK	0.266169	0.682836	0.050995	0.3898	0.0746812	0.191589	0.362712	2.15294	0.0537353	804
RANBP2	0.216418	0.701493	0.0820896	0.308511	0.117021	0.37931	0.27619	2.35	0.0894309	804
BOD1L	0.198007	0.745953	0.0560399	0.265442	0.0751252	0.283019	0.246894	2.93627	0.0593668	803
PCDHA8	0.298879	0.676214	0.0249066	0.441989	0.0368324	0.0833333	0.426288	2.08846	0.0255428	803
TSHR	0.120797	0.840598	0.0386052	0.143704	0.0459259	0.319588	0.137394	5.27344	0.0401554	803
IGF2R	0.239401	0.67207	0.0885287	0.356215	0.131725	0.369792	0.314754	2.04943	0.0971272	802
KIAA2022	0.195761	0.723192	0.0810474	0.27069	0.112069	0.414013	0.243411	2.61261	0.0881954	802
HLA-C	0.129838	0.852684	0.0174782	0.152269	0.0204978	0.134615	0.149211	5.78814	0.0177891	801
SCN7A	0.182272	0.730337	0.0873908	0.249573	0.119658	0.479452	0.222901	2.70833	0.0957592	801
CHD4	0.185	0.73	0.085	0.253425	0.116438	0.459459	0.226994	2.7037	0.0928962	800
KIAA1109_ENST00000455637	0.1825	0.73625	0.08125	0.247878	0.110357	0.445205	0.223242	2.79147	0.0884354	800
PCDH11X	0.2075	0.73375	0.05875	0.282794	0.0800681	0.283133	0.26183	2.75587	0.062417	800
SMG1	0.2625	0.67	0.0675	0.391791	0.100746	0.257143	0.355932	2.0303	0.0723861	800
COL4A5	0.211514	0.734668	0.0538173	0.287905	0.0732538	0.254438	0.268254	2.76887	0.0568783	799
GLI2	0.290363	0.665832	0.0438048	0.43609	0.0657895	0.150862	0.409171	1.99251	0.0458115	799
VPS13A_ENST00000376634	0.165207	0.720901	0.113892	0.229167	0.157986	0.689394	0.197901	2.58296	0.128531	799
ADAMTS7	0.294486	0.657895	0.047619	0.447619	0.072381	0.161702	0.417407	1.92308	0.05	798
CUL9	0.226817	0.721805	0.0513784	0.314236	0.0711806	0.226519	0.293355	2.59459	0.0541612	798
C3	0.263488	0.662484	0.0740276	0.397727	0.111742	0.280952	0.357751	1.96283	0.0799458	797
CHD4_ENST00000357008	0.19197	0.730238	0.0777917	0.262887	0.106529	0.405229	0.237578	2.70698	0.0843537	797
U2AF1	0.0326223	0.956085	0.0112923	0.0341207	0.011811	0.346154	0.0337224	21.7714	0.0114213	797
ZNF423_ENST00000262383	0.331242	0.638645	0.0301129	0.518664	0.0471513	0.0909091	0.49531	1.76736	0.0310479	797
ASTN2	0.257862	0.68805	0.0540881	0.374771	0.0786106	0.209756	0.347458	2.20565	0.0571809	795
KIAA1217	0.25283	0.695597	0.0515723	0.363472	0.074141	0.20398	0.338384	2.28512	0.0543767	795
ZNF423	0.335849	0.633962	0.0301887	0.529762	0.047619	0.0898876	0.505682	1.73196	0.0311284	795
CPS1	0.22796	0.711587	0.0604534	0.320354	0.0849558	0.265193	0.295269	2.46725	0.0643432	794
FRYL	0.187657	0.7267	0.0856423	0.258232	0.117851	0.456376	0.231008	2.65899	0.0936639	794
KDM5C	0.107053	0.670025	0.222922	0.159774	0.332707	2.08235	0.119887	2.03053	0.286872	794
PCDHA5_ENST00000529859	0.309824	0.661209	0.0289673	0.468571	0.0438095	0.0934959	0.448905	1.95167	0.0298314	794
TDRD6	0.190176	0.711587	0.0982368	0.267257	0.138053	0.516556	0.234837	2.46725	0.108939	794
MYO7A	0.281566	0.664141	0.0542929	0.423954	0.081749	0.192825	0.391916	1.97744	0.0574099	792
PLXNA1	0.353535	0.582071	0.0643939	0.607375	0.110629	0.182143	0.546875	1.39275	0.0688259	792
AXIN1	0.130215	0.5689	0.300885	0.228889	0.528889	2.31068	0.149709	1.31965	0.43038	791
CFTR	0.208597	0.718078	0.0733249	0.290493	0.102113	0.351515	0.263578	2.54709	0.0791269	791
SIPA1L3	0.266751	0.685209	0.0480405	0.389299	0.0701107	0.180095	0.363793	2.17671	0.0504648	791
ADCY2	0.277215	0.686076	0.0367089	0.404059	0.0535055	0.13242	0.383538	2.18548	0.0381078	790
PCDHA1	0.298734	0.673418	0.0278481	0.443609	0.0413534	0.0932203	0.425993	2.06202	0.0286458	790
PCDHA7_ENST00000525929	0.28481	0.683544	0.0316456	0.416667	0.0462963	0.111111	0.39823	2.16	0.0326797	790
PCDHB8	0.322785	0.643038	0.0341772	0.501969	0.0531496	0.105882	0.476636	1.80142	0.0353866	790
CEP350	0.157161	0.730038	0.112801	0.215278	0.154514	0.717742	0.186466	2.70423	0.127143	789
CFH	0.205323	0.718631	0.0760456	0.285714	0.10582	0.37037	0.258373	2.55405	0.0823045	789
PCDHA6	0.321926	0.657795	0.0202788	0.489403	0.0308285	0.0629921	0.474766	1.92222	0.0206986	789
EGFL4	0.286802	0.648477	0.0647208	0.44227	0.0998043	0.225664	0.402135	1.84477	0.0691995	788
EPHA6	0.222081	0.727157	0.0507614	0.30541	0.069808	0.228571	0.285481	2.66512	0.0534759	788
CACNA1I_ENST00000402142	0.261753	0.714104	0.0241423	0.366548	0.0338078	0.092233	0.354561	2.49778	0.0247396	787
MAP1A	0.237611	0.700127	0.0622618	0.339383	0.0889292	0.262032	0.311667	2.33475	0.0663957	787
HGF	0.122137	0.779898	0.0979644	0.156607	0.125612	0.802083	0.13913	3.54335	0.108604	786
TSHZ3	0.29172	0.658599	0.0496815	0.44294	0.0754352	0.170306	0.411871	1.9291	0.0522788	785
CHEK2	0.228316	0.700255	0.0714286	0.326047	0.102004	0.312849	0.295868	2.33617	0.0769231	784
PLXNA2	0.220663	0.733418	0.0459184	0.30087	0.0626087	0.208092	0.283142	2.7512	0.0481283	784
NRXN2	0.303959	0.625798	0.0702427	0.485714	0.112245	0.231092	0.436697	1.67235	0.0755495	783
PCDHA11_ENST00000398640	0.340996	0.62069	0.0383142	0.549383	0.0617284	0.11236	0.517442	1.63636	0.0398406	783
PLCE1	0.217391	0.700767	0.0818414	0.310219	0.116788	0.376471	0.277778	2.34188	0.0891365	782
DNAH14	0.184379	0.710627	0.104994	0.259459	0.147748	0.569444	0.22606	2.45575	0.11731	781
NFE2L2	0.0448143	0.915493	0.0396927	0.048951	0.0433566	0.885714	0.0469169	10.8333	0.0413333	781
SORCS1_ENST00000344440	0.248399	0.6863	0.0653009	0.36194	0.0951493	0.262887	0.330494	2.18776	0.069863	781
NLRP13	0.29359	0.641026	0.0653846	0.458	0.102	0.222707	0.415608	1.78571	0.0699588	780
PCDHA2	0.261538	0.702564	0.0358974	0.372263	0.0510949	0.137255	0.354167	2.36207	0.037234	780
RPTOR	0.294872	0.647436	0.0576923	0.455446	0.0891089	0.195652	0.418182	1.83636	0.0612245	780
STAT3	0.108974	0.838462	0.0525641	0.129969	0.0626911	0.482353	0.122302	5.19048	0.0554804	780
GPRIN2	0.157895	0.826701	0.0154044	0.190994	0.0186335	0.097561	0.1875	4.77037	0.0156454	779
WNK2_ENST00000297954	0.284981	0.650834	0.0641849	0.43787	0.0986193	0.225225	0.398564	1.86397	0.0685871	779
PCDHGA2	0.281491	0.677378	0.0411311	0.41556	0.0607211	0.146119	0.391771	2.0996	0.0428954	778
CDK12	0.122265	0.617761	0.259974	0.197917	0.420833	2.12632	0.139296	1.61616	0.351304	777
CTNNA2_ENST00000361291	0.266409	0.696268	0.037323	0.382625	0.0536044	0.140097	0.363158	2.29237	0.0387701	777
DNAH12	0.166023	0.731017	0.10296	0.227113	0.140845	0.620155	0.199074	2.7177	0.114778	777
USP6	0.144144	0.813385	0.042471	0.177215	0.0522152	0.294643	0.168421	4.35862	0.0443548	777
ASTN2_ENST00000313400	0.26933	0.681701	0.0489691	0.395085	0.0718336	0.181818	0.368607	2.1417	0.0514905	776
HIVEP2	0.243557	0.673969	0.0824742	0.361377	0.122371	0.338624	0.321976	2.06719	0.0898876	776
LAMC3	0.290323	0.651613	0.0580645	0.445545	0.0891089	0.2	0.409091	1.87037	0.0616438	775
TNS1	0.250323	0.689032	0.0606452	0.363296	0.088015	0.242268	0.333907	2.21577	0.0645604	775
CNTNAP4_ENST00000478060	0.237726	0.698966	0.0633075	0.340111	0.090573	0.266304	0.311864	2.32189	0.0675862	774
KDM5A	0.112403	0.732558	0.155039	0.153439	0.21164	1.37931	0.126638	2.73913	0.183486	774
LPHN2_ENST00000370725	0.196382	0.742894	0.0607235	0.264348	0.0817391	0.309211	0.244373	2.88945	0.0646492	774
NWD1_ENST00000524140	0.249354	0.687339	0.0633075	0.362782	0.0921053	0.253886	0.332186	2.19835	0.0675862	774
SIPA1L2	0.257106	0.655039	0.0878553	0.392505	0.134122	0.341709	0.346087	1.89888	0.0963173	774
CR1_ENST00000367049	0.16947	0.732212	0.0983182	0.231449	0.134276	0.580153	0.20405	2.7343	0.109039	773
UNC13A	0.25097	0.680466	0.068564	0.368821	0.10076	0.273196	0.33506	2.12955	0.0736111	773
ANKRD17	0.291451	0.67487	0.0336788	0.431862	0.049904	0.115556	0.411335	2.0757	0.0348525	772
LOXHD1	0.242228	0.712435	0.0453368	0.34	0.0636364	0.187166	0.319658	2.47748	0.0474898	772
PREX2_ENST00000354677	0.224093	0.704663	0.0712435	0.318015	0.101103	0.317919	0.288815	2.38596	0.0767085	772
SIGLEC1	0.309585	0.645078	0.0453368	0.47992	0.0702811	0.146444	0.448405	1.81752	0.0474898	772
WNK2	0.265544	0.661917	0.0725389	0.401174	0.109589	0.273171	0.361552	1.95785	0.0782123	772
ABCC9_ENST00000261201	0.223087	0.710765	0.0661479	0.313869	0.0930657	0.296512	0.287145	2.4574	0.0708333	771
PCDHA9_ENST00000532602	0.352789	0.619974	0.0272374	0.569038	0.0439331	0.0772059	0.54509	1.6314	0.028	771
PKD1L2_ENST00000525539	0.252918	0.619974	0.127108	0.40795	0.205021	0.502564	0.338542	1.6314	0.145617	771
FAT3	0.263636	0.698701	0.0376623	0.377323	0.0539033	0.142857	0.358025	2.31897	0.0391363	770
TEK_ENST00000380036	0.351948	0.594805	0.0532468	0.591703	0.0895197	0.151292	0.543086	1.46795	0.0562414	770
AQP7	0.214844	0.766927	0.0182292	0.280136	0.0237691	0.0848485	0.273632	3.2905	0.0185676	768
KALRN	0.238281	0.690104	0.0716146	0.345283	0.103774	0.300546	0.312821	2.22689	0.0771388	768
SHANK2_ENST00000338508	0.275098	0.666232	0.0586701	0.412916	0.0880626	0.21327	0.379496	1.99609	0.0623269	767
CEP350_ENST00000367607	0.146214	0.74282	0.110966	0.196837	0.149385	0.758929	0.171254	2.88832	0.124816	766
VPS13A_ENST00000357409	0.164491	0.723238	0.112272	0.227437	0.155235	0.68254	0.196875	2.61321	0.126471	766
ADAMTS2	0.270588	0.684967	0.0444444	0.395038	0.0648855	0.164251	0.370968	2.17427	0.0465116	765
EPHA6_ENST00000389672	0.228758	0.720261	0.0509804	0.317604	0.0707804	0.222857	0.29661	2.57477	0.053719	765
SAMD9L	0.163827	0.732634	0.103539	0.223614	0.141324	0.632	0.195925	2.7402	0.115497	763
SETX	0.190039	0.715596	0.0943644	0.265568	0.131868	0.496552	0.234628	2.51613	0.104197	763
KCNT2	0.217848	0.683727	0.0984252	0.318618	0.143954	0.451807	0.278523	2.16183	0.10917	762
MYT1L_ENST00000428368	0.305774	0.652231	0.0419948	0.468813	0.0643863	0.137339	0.440454	1.87547	0.0438356	762
ABCB1	0.178712	0.750329	0.0709593	0.238179	0.0945709	0.397059	0.2176	3.00526	0.0763791	761
KDM5A_ENST00000399788	0.114323	0.738502	0.147175	0.154804	0.199288	1.28736	0.12908	2.82412	0.172573	761
PLCH1	0.254928	0.680683	0.064389	0.374517	0.0945946	0.252577	0.342152	2.13169	0.0688202	761
TMEM132B	0.259211	0.685526	0.0552632	0.378119	0.0806142	0.213198	0.349911	2.17992	0.0584958	760
LPHN2	0.198946	0.744401	0.0566535	0.267257	0.0761062	0.284768	0.248355	2.91237	0.0600559	759
ZNF462_ENST00000457913	0.241107	0.673254	0.085639	0.358121	0.127202	0.355191	0.317708	2.06048	0.0936599	759
SPTAN1	0.302111	0.602902	0.0949868	0.501094	0.157549	0.31441	0.432892	1.51827	0.104956	758
MYH3	0.313078	0.632761	0.0541612	0.494781	0.085595	0.172996	0.455769	1.72302	0.0572626	757
NEFH	0.330251	0.645971	0.0237781	0.511247	0.0368098	0.072	0.493097	1.82463	0.0243572	757
ABCC8	0.313492	0.64418	0.042328	0.486653	0.0657084	0.135021	0.456647	1.81041	0.0441989	756
C2orf16_ENST00000408964	0.170635	0.767196	0.0621693	0.222414	0.0810345	0.364341	0.205742	3.29545	0.0662906	756
NLRP7_ENST00000328092	0.298942	0.640212	0.0608466	0.466942	0.0950413	0.20354	0.426415	1.77941	0.0647887	756
PPFIA2	0.161376	0.736772	0.101852	0.219031	0.138241	0.631148	0.192429	2.79899	0.113402	756
BZRAP1_ENST00000355701	0.208499	0.662683	0.128818	0.314629	0.194389	0.617834	0.263423	1.96457	0.147866	753
C11orf41_ENST00000321505	0.294821	0.660027	0.0451527	0.44668	0.0684105	0.153153	0.418079	1.94141	0.0472879	753
CACNA1D_ENST00000350061	0.286853	0.626826	0.0863214	0.457627	0.137712	0.300926	0.402235	1.67972	0.0944767	753
SZT2	0.232404	0.697211	0.0703851	0.333333	0.100952	0.302857	0.302768	2.30263	0.0757143	753
ATXN1	0.167553	0.765957	0.0664894	0.21875	0.0868056	0.396825	0.201278	3.27273	0.0712251	752
KIAA0947_ENST00000296564	0.182181	0.692819	0.125	0.262956	0.180422	0.686131	0.222764	2.25541	0.142857	752
AFF3	0.29028	0.651132	0.0585885	0.445808	0.0899796	0.201835	0.409006	1.86641	0.0622348	751
ABCA1	0.222667	0.716	0.0613333	0.310987	0.0856611	0.275449	0.286449	2.52113	0.0653409	750
CCDC108	0.251001	0.64753	0.101469	0.387629	0.156701	0.404255	0.335116	1.83712	0.112927	749
DOCK8_ENST00000453981	0.224299	0.660881	0.11482	0.339394	0.173737	0.511905	0.289157	1.94882	0.129713	749
PLCG2_ENST00000359376	0.202937	0.740988	0.0560748	0.273874	0.0756757	0.276316	0.254606	2.86082	0.0594059	749
BZRAP1	0.208835	0.661312	0.129853	0.315789	0.196356	0.621795	0.263959	1.95257	0.149231	747
CR1	0.167336	0.725569	0.107095	0.230627	0.147601	0.64	0.200965	2.6439	0.11994	747
KIAA0467_ENST00000372442	0.232932	0.696118	0.0709505	0.334615	0.101923	0.304598	0.303665	2.29075	0.0763689	747
NCOA6	0.30563	0.626005	0.0683646	0.488223	0.109208	0.223684	0.440154	1.67384	0.0733813	746
PLCB1	0.253351	0.69571	0.0509383	0.364162	0.0732177	0.201058	0.339318	2.28634	0.0536723	746
ZNF292_ENST00000369577	0.150134	0.632708	0.217158	0.237288	0.34322	1.44643	0.176656	1.72263	0.277397	746
ERBB2_ENST00000541774	0.0778523	0.897987	0.0241611	0.0866966	0.0269058	0.310345	0.084425	8.80263	0.0247593	745
ITGAX	0.280537	0.67651	0.042953	0.414683	0.0634921	0.15311	0.389925	2.09129	0.0448808	745
PLCG2	0.202685	0.74094	0.0563758	0.273551	0.076087	0.278146	0.254209	2.8601	0.059744	745
AFF2_ENST00000370460	0.22043	0.729839	0.0497312	0.302026	0.06814	0.22561	0.282759	2.70149	0.0523338	744
AQP7_ENST00000379507	0.204301	0.778226	0.0174731	0.262522	0.0224525	0.0855263	0.256757	3.50909	0.0177839	744
GTF3C1	0.236559	0.68414	0.0793011	0.345776	0.115914	0.335227	0.309859	2.16596	0.0861314	744
KIF4B_ENST00000435029	0.276882	0.681452	0.0416667	0.406312	0.061144	0.150485	0.3829	2.13924	0.0434783	744
LAMB4	0.204301	0.712366	0.0833333	0.286792	0.116981	0.407895	0.256757	2.47664	0.0909091	744
KIF21B	0.316285	0.629879	0.0538358	0.502137	0.0854701	0.170213	0.462598	1.70182	0.056899	743
KIF4B	0.275908	0.682369	0.0417227	0.404339	0.061144	0.15122	0.381041	2.14831	0.0435393	743
SON	0.273217	0.625841	0.100942	0.436559	0.16129	0.369458	0.375926	1.67266	0.112275	743
ASXL2_ENST00000435504	0.126685	0.703504	0.169811	0.180077	0.241379	1.34043	0.145062	2.37273	0.204545	742
CNOT1	0.199461	0.72372	0.0768194	0.275605	0.106145	0.385135	0.249158	2.61951	0.0832117	742
COL18A1	0.320755	0.614555	0.06469	0.52193	0.105263	0.201681	0.472222	1.59441	0.0691643	742
INSR	0.328841	0.623989	0.0471698	0.526998	0.075594	0.143443	0.48996	1.6595	0.049505	742
COL4A2	0.276653	0.65857	0.0647773	0.420082	0.0983607	0.234146	0.382463	1.92885	0.0692641	741
MYST3	0.28475	0.646424	0.0688259	0.440501	0.106472	0.241706	0.398113	1.82824	0.073913	741
PCDH18	0.206478	0.747638	0.0458839	0.276173	0.0613718	0.222222	0.260204	2.96257	0.0480905	741
WNK1_ENST00000537687	0.240216	0.680162	0.0796221	0.353175	0.117063	0.331461	0.316163	2.12658	0.0865103	741
INSR_ENST00000302850	0.324324	0.627027	0.0486486	0.517241	0.0775862	0.15	0.48	1.68116	0.0511364	740
PDGFRB	0.22973	0.712162	0.0581081	0.322581	0.0815939	0.252941	0.298246	2.47418	0.061693	740
SLITRK1	0.327027	0.616216	0.0567568	0.530702	0.0921053	0.173554	0.485944	1.60563	0.0601719	740
KIAA1462	0.26387	0.68065	0.0554804	0.387674	0.0815109	0.210256	0.358456	2.13136	0.0587393	739
KNDC1	0.326116	0.627876	0.0460081	0.519397	0.0732759	0.141079	0.483936	1.68727	0.048227	739
LTBP1	0.273342	0.675237	0.0514208	0.40481	0.0761523	0.188119	0.376164	2.07917	0.0542083	739
NWD1	0.259811	0.667118	0.0730717	0.389452	0.109533	0.28125	0.351005	2.00407	0.0788321	739
PREX1	0.277402	0.691475	0.0311231	0.401174	0.0450098	0.112195	0.383895	2.24123	0.0321229	739
UNC13A_ENST00000519716	0.253045	0.688769	0.0581867	0.367387	0.0844794	0.229947	0.338768	2.21304	0.0617816	739
ZNF814	0.315291	0.637348	0.0473613	0.494692	0.07431	0.150215	0.460474	1.75746	0.0497159	739
TRPM3_ENST00000377105	0.238482	0.708672	0.0528455	0.33652	0.0745698	0.221591	0.313167	2.43256	0.055794	738
COL18A1_ENST00000359759	0.328358	0.606513	0.0651289	0.541387	0.107383	0.198347	0.488889	1.54138	0.0696662	737
CPS1_ENST00000430249	0.213026	0.729986	0.0569878	0.291822	0.0780669	0.267516	0.27069	2.70352	0.0604317	737
DUSP27	0.221167	0.72863	0.0502035	0.303538	0.0689013	0.226994	0.283972	2.685	0.0528571	737
GRM7	0.280868	0.629579	0.0895522	0.446121	0.142241	0.318841	0.390566	1.69963	0.0983607	737
ZZEF1	0.282225	0.651289	0.0664858	0.433333	0.102083	0.235577	0.393195	1.8677	0.0712209	737
COL27A1	0.255435	0.690217	0.0543478	0.370079	0.0787402	0.212766	0.343066	2.22807	0.0574713	736
IRS1	0.164402	0.736413	0.0991848	0.223247	0.134686	0.603306	0.196748	2.79381	0.110106	736
NLRP8_ENST00000291971	0.264946	0.66712	0.0679348	0.397149	0.101833	0.25641	0.360444	2.00408	0.0728863	736
TEK	0.358696	0.592391	0.048913	0.605505	0.0825688	0.136364	0.559322	1.45333	0.0514286	736
UTP20	0.213315	0.714674	0.0720109	0.298479	0.10076	0.33758	0.271157	2.50476	0.0775988	736
IRS4	0.238095	0.680272	0.0816327	0.35	0.12	0.342857	0.3125	2.12766	0.0888889	735
KCNH7	0.231608	0.696185	0.0722071	0.332681	0.103718	0.311765	0.301418	2.29148	0.0778267	734
LRFN5	0.183924	0.758856	0.0572207	0.24237	0.0754039	0.311111	0.225376	3.14689	0.0606936	734
MYH14_ENST00000262269	0.257493	0.707084	0.0354223	0.364162	0.0500963	0.137566	0.346789	2.41395	0.0367232	734
PRSS3_ENST00000342836	0.16485	0.757493	0.0776567	0.217626	0.102518	0.471074	0.19739	3.1236	0.084195	734
FAM38B_ENST00000302079	0.248295	0.657572	0.0941337	0.377593	0.143154	0.379121	0.330309	1.92032	0.103916	733
COL15A1	0.254446	0.697674	0.0478796	0.364706	0.0686275	0.188172	0.341284	2.30769	0.0502874	731
ENSG00000188219	0.273598	0.685363	0.0410397	0.399202	0.0598802	0.15	0.376648	2.17826	0.042796	731
SPTBN2_ENST00000529997	0.257182	0.694938	0.0478796	0.370079	0.0688976	0.18617	0.346225	2.27803	0.0502874	731
WBSCR17	0.243502	0.716826	0.0396717	0.339695	0.0553435	0.162921	0.321881	2.5314	0.0413105	731
WT1_ENST00000332351	0.220246	0.428181	0.351573	0.514377	0.821086	1.59627	0.282456	0.748804	0.542194	731
ZEB2	0.276334	0.645691	0.0779754	0.427966	0.120763	0.282178	0.381853	1.82239	0.0845697	731
HECW2	0.221918	0.708219	0.069863	0.313346	0.098646	0.314815	0.285211	2.42723	0.0751105	730
TP63	0.182192	0.736986	0.0808219	0.247212	0.109665	0.443609	0.222781	2.80208	0.0879285	730
ADAMTS20_ENST00000553158	0.196159	0.709191	0.0946502	0.276596	0.133462	0.482517	0.244027	2.43868	0.104545	729
ANKRD36C	0.105624	0.809328	0.085048	0.130508	0.105085	0.805195	0.118098	4.2446	0.0929535	729
ANKRD36C_ENST00000420871	0.105624	0.809328	0.085048	0.130508	0.105085	0.805195	0.118098	4.2446	0.0929535	729
CASZ1	0.296296	0.604938	0.0987654	0.489796	0.163265	0.333333	0.421053	1.53125	0.109589	729
DOCK4	0.233196	0.680384	0.0864198	0.342742	0.127016	0.370588	0.304114	2.12876	0.0945946	729
GNA11	0.0699588	0.90535	0.0246914	0.0772727	0.0272727	0.352941	0.0752212	9.56522	0.0253165	729
IGF1R	0.201646	0.747599	0.0507545	0.269725	0.0678899	0.251701	0.252577	2.96196	0.0534682	729
DAAM2	0.539835	0.442308	0.0178571	1.2205	0.0403727	0.0330789	1.17313	0.793103	0.0181818	728
ZNF91_ENST00000300619	0.181319	0.777473	0.0412088	0.233216	0.0530035	0.227273	0.221477	3.49383	0.0429799	728
C2orf16	0.170564	0.768913	0.0605227	0.221825	0.078712	0.354839	0.205638	3.32738	0.0644217	727
BPTF	0.187328	0.730028	0.0826446	0.256604	0.113208	0.441176	0.230508	2.70408	0.0900901	726
CHD8	0.15427	0.698347	0.147383	0.220907	0.211045	0.955357	0.18241	2.31507	0.172859	726
GRID1	0.27686	0.687328	0.0358127	0.402806	0.0521042	0.129353	0.382857	2.19824	0.0371429	726
MAST4_ENST00000404260	0.260331	0.674931	0.0647383	0.385714	0.0959184	0.248677	0.351955	2.07627	0.0692194	726
PTPRC	0.199725	0.731405	0.0688705	0.27307	0.094162	0.344828	0.24957	2.72308	0.0739645	726
ABCA8	0.273103	0.664828	0.062069	0.410788	0.093361	0.227273	0.375712	1.98354	0.0661765	725
C6	0.231724	0.666207	0.102069	0.347826	0.153209	0.440476	0.301616	1.99587	0.113671	725
GRM5_ENST00000418177	0.230345	0.722759	0.0468966	0.318702	0.0648855	0.203593	0.299283	2.60697	0.0492041	725
HECTD1	0.25931	0.68	0.0606897	0.381339	0.0892495	0.234043	0.350093	2.125	0.0646109	725
HLA-DRB5	0.114483	0.837241	0.0482759	0.136738	0.0576606	0.421687	0.129283	5.14407	0.0507246	725
SLITRK5	0.274483	0.681379	0.0441379	0.402834	0.0647773	0.160804	0.378327	2.13853	0.046176	725
CAMTA1	0.309392	0.629834	0.0607735	0.491228	0.0964912	0.196429	0.448	1.70149	0.0647059	724
MST1P9	0.279006	0.649171	0.0718232	0.429787	0.110638	0.257426	0.386973	1.85039	0.077381	724
NLRP7	0.302486	0.635359	0.0621547	0.476087	0.0978261	0.205479	0.433663	1.74242	0.0662739	724
OBSL1_ENST00000404537	0.269337	0.679558	0.051105	0.396341	0.0752033	0.189744	0.36862	2.12069	0.0538574	724
XIRP1	0.244475	0.698895	0.0566298	0.349802	0.0810277	0.231638	0.323583	2.3211	0.0600293	724
MYH7B	0.271093	0.687414	0.0414938	0.394366	0.0603622	0.153061	0.371917	2.19912	0.04329	723
REV3L	0.17704	0.723375	0.0995851	0.244742	0.137667	0.5625	0.215126	2.615	0.110599	723
UNC5D	0.278008	0.66805	0.0539419	0.416149	0.0807453	0.19403	0.385057	2.0125	0.0570175	723
ZFYVE26	0.229599	0.728907	0.0414938	0.314991	0.056926	0.180723	0.298025	2.68878	0.04329	723
FRAS1_ENST00000325942	0.217452	0.706371	0.0761773	0.307843	0.107843	0.350318	0.277876	2.40566	0.0824588	722
KIAA1211	0.218837	0.685596	0.0955679	0.319192	0.139394	0.436709	0.280142	2.18062	0.105666	722
PCDHB3	0.3241	0.631579	0.0443213	0.513158	0.0701754	0.136752	0.479508	1.71429	0.0463768	722
SYNE2_ENST00000357395	0.211911	0.706371	0.0817175	0.3	0.115686	0.385621	0.268893	2.40566	0.0889894	722
PCDHGA1_ENST00000517417	0.253814	0.701803	0.0443828	0.36166	0.0632411	0.174863	0.340149	2.35349	0.0464441	721
ZNF292	0.148405	0.633842	0.217753	0.234136	0.343545	1.46729	0.174267	1.73106	0.278369	721
BDP1	0.180556	0.694444	0.125	0.26	0.18	0.692308	0.220339	2.27273	0.142857	720
POTEF	0.213889	0.741667	0.0444444	0.28839	0.0599251	0.207792	0.272085	2.87097	0.0465116	720
FRG1B_ENST00000439954	0.0709318	0.887344	0.0417246	0.0799373	0.0470219	0.588235	0.0763473	7.87654	0.0435414	719
KCNH5	0.25452	0.675939	0.069541	0.376543	0.102881	0.273224	0.341418	2.08584	0.0747384	719
KIF1A	0.260083	0.687065	0.0528512	0.378543	0.0769231	0.203209	0.351504	2.19556	0.0558003	719
LRRIQ1	0.171071	0.691238	0.137691	0.247485	0.199195	0.804878	0.206376	2.23874	0.159677	719
PTPN13	0.191933	0.699583	0.108484	0.274354	0.15507	0.565217	0.237522	2.3287	0.121685	719
SLITRK3	0.232267	0.689847	0.077886	0.336694	0.112903	0.335329	0.302536	2.22422	0.0844646	719
DOPEY2	0.247911	0.662953	0.0891365	0.37395	0.134454	0.359551	0.32963	1.96694	0.0978593	718
DST	0.182451	0.703343	0.114206	0.259406	0.162376	0.625954	0.223169	2.37089	0.128931	718
HDAC9_ENST00000262069	0.247911	0.669916	0.0821727	0.370062	0.122661	0.331461	0.32963	2.02954	0.0895296	718
ADAMTS9	0.206416	0.700139	0.0934449	0.294821	0.133466	0.452703	0.260105	2.33488	0.103077	717
GRIN3A	0.248257	0.698745	0.0529986	0.355289	0.0758483	0.213483	0.330241	2.31944	0.0559647	717
ABCB11	0.312849	0.634078	0.0530726	0.493392	0.0837004	0.169643	0.455285	1.73282	0.0560472	716
ATP2B2	0.356145	0.608939	0.0349162	0.584862	0.0573394	0.0980392	0.553145	1.55714	0.0361795	716
CACNA1I_ENST00000336649	0.269553	0.703911	0.0265363	0.382937	0.0376984	0.0984456	0.369025	2.37736	0.0272597	716
PLCH1_ENST00000340059	0.255587	0.680168	0.0642458	0.37577	0.0944559	0.251366	0.34334	2.12664	0.0686567	716
RBM10	0.075419	0.53352	0.391061	0.141361	0.732984	5.18519	0.081571	1.14371	0.642202	716
COL24A1	0.173427	0.73986	0.0867133	0.234405	0.117202	0.5	0.209814	2.84409	0.0949464	715
PCSK5_ENST00000545128	0.22549	0.715686	0.0588235	0.315068	0.0821918	0.26087	0.291139	2.51724	0.0625	714
ZNF676	0.2507	0.705882	0.0434174	0.355159	0.0615079	0.173184	0.334579	2.4	0.045388	714
DST_ENST00000370765	0.183731	0.701262	0.115007	0.262	0.164	0.625954	0.225086	2.34742	0.129952	713
INTS1	0.326788	0.584853	0.088359	0.558753	0.151079	0.270386	0.485417	1.40878	0.0969231	713
HNRNPCL1	0.191011	0.797753	0.011236	0.239437	0.0140845	0.0588235	0.236111	3.94444	0.0113636	712
IGSF3_ENST00000369483	0.20927	0.714888	0.0758427	0.292731	0.10609	0.362416	0.264654	2.50739	0.0820669	712
REV3L_ENST00000358835	0.182584	0.72191	0.0955056	0.252918	0.132296	0.523077	0.223368	2.59596	0.10559	712
BPTF_ENST00000335221	0.19128	0.727145	0.0815752	0.263056	0.112186	0.426471	0.236522	2.66495	0.0888208	711
CAD	0.253165	0.686357	0.0604782	0.368852	0.0881148	0.238889	0.338983	2.18834	0.0643713	711
DOCK8	0.227848	0.662447	0.109705	0.343949	0.165605	0.481481	0.295082	1.9625	0.123223	711
HDAC9	0.246132	0.673699	0.0801688	0.365344	0.118998	0.325714	0.326493	2.06466	0.087156	711
LPHN3_ENST00000507625	0.246132	0.699015	0.0548523	0.352113	0.0784708	0.222857	0.326493	2.32243	0.0580357	711
PPP1R3A_ENST00000284601	0.170423	0.738028	0.0915493	0.230916	0.124046	0.53719	0.205433	2.8172	0.100775	710
SLIT3_ENST00000404867	0.319718	0.642254	0.0380282	0.497807	0.0592105	0.118943	0.469979	1.79528	0.0395315	710
CACNA1I_ENST00000400164	0.269394	0.703808	0.0267983	0.382766	0.0380762	0.0994764	0.368726	2.37619	0.0275362	709
GRM5	0.22426	0.726375	0.0493653	0.308738	0.0679612	0.220126	0.289091	2.65464	0.0519288	709
KIF1A_ENST00000498729	0.2567	0.688293	0.0550071	0.372951	0.079918	0.214286	0.345351	2.20814	0.058209	709
NRAP	0.217514	0.714689	0.0677966	0.304348	0.0948617	0.311688	0.277978	2.50495	0.0727273	708
PCDHA5	0.317797	0.65113	0.0310734	0.488069	0.0477223	0.0977778	0.465839	1.8664	0.03207	708
SMO	0.0918079	0.836158	0.0720339	0.109797	0.0861486	0.784615	0.101089	5.10345	0.0776256	708
CDH12	0.206506	0.729844	0.0636492	0.282946	0.0872093	0.308219	0.26025	2.70157	0.0679758	707
FGFR3_ENST00000340107	0.161245	0.803395	0.0353607	0.200704	0.0440141	0.219298	0.192243	4.08633	0.0366569	707
GATA2	0.243281	0.710042	0.0466761	0.342629	0.0657371	0.19186	0.321495	2.44878	0.0489614	707
JAK3_ENST00000458235	0.166902	0.710042	0.123055	0.23506	0.173307	0.737288	0.20034	2.44878	0.140323	707
CD163	0.239377	0.709632	0.0509915	0.337325	0.0718563	0.213018	0.314711	2.4439	0.0537313	706
COL19A1	0.175637	0.760623	0.0637394	0.230912	0.0837989	0.362903	0.213058	3.17751	0.0680787	706
DOCK4_ENST00000437633	0.228045	0.685552	0.0864023	0.332645	0.126033	0.378882	0.295413	2.18018	0.0945736	706
PCDHA10_ENST00000307360	0.29745	0.679887	0.0226629	0.4375	0.0333333	0.0761905	0.423387	2.12389	0.0231884	706
PLCB4	0.1983	0.720963	0.0807365	0.275049	0.111984	0.407143	0.24735	2.58376	0.0878274	706
CDH4	0.296454	0.675177	0.0283688	0.439076	0.0420168	0.0956938	0.421371	2.0786	0.0291971	705
PZP	0.236879	0.723404	0.0397163	0.327451	0.054902	0.167665	0.310409	2.61538	0.0413589	705
PRSS3	0.174716	0.74858	0.0767045	0.233397	0.102467	0.439024	0.211704	2.9774	0.0830769	704
ATG2A	0.231863	0.708393	0.059744	0.327309	0.0843373	0.257669	0.301852	2.42927	0.0635401	703
COL5A2	0.170697	0.772404	0.056899	0.220994	0.0736648	0.333333	0.205832	3.39375	0.0603318	703
HEATR1	0.234708	0.71266	0.0526316	0.329341	0.0738523	0.224242	0.306691	2.4802	0.0555556	703
KDM5C_ENST00000375401	0.116643	0.688478	0.194879	0.169421	0.283058	1.67073	0.132045	2.21005	0.242049	703
TPR	0.170697	0.719772	0.109531	0.237154	0.152174	0.641667	0.205832	2.56853	0.123003	703
DNMT1	0.213675	0.7151	0.0712251	0.298805	0.0996016	0.333333	0.271739	2.51	0.0766871	702
EGFR_ENST00000344576	0.186876	0.783167	0.0299572	0.238616	0.0382514	0.160305	0.229825	3.61184	0.0308824	701
GRID2	0.192582	0.75321	0.0542083	0.255682	0.0719697	0.281481	0.238516	3.05202	0.0573152	701
IGSF3	0.208274	0.721826	0.0699001	0.288538	0.0968379	0.335616	0.263063	2.59487	0.0751534	701
SAMD9	0.188302	0.706134	0.105563	0.266667	0.149495	0.560606	0.231986	2.40291	0.118022	701
THBS2	0.340942	0.589158	0.0699001	0.578692	0.118644	0.205021	0.517316	1.43403	0.0751534	701
LRRK1_ENST00000388948	0.331429	0.614286	0.0542857	0.539535	0.0883721	0.163793	0.495726	1.59259	0.0574018	700
DOCK10	0.20887	0.713877	0.0772532	0.292585	0.108216	0.369863	0.264014	2.495	0.0837209	699
LOXHD1_ENST00000398722	0.256447	0.696275	0.0472779	0.368313	0.0679012	0.184358	0.344894	2.29245	0.0496241	698
AXIN2	0.15208	0.588235	0.259684	0.258537	0.441463	1.70755	0.179357	1.42857	0.350775	697
CCDC141_ENST00000420890	0.20373	0.718795	0.0774749	0.283433	0.107784	0.380282	0.255856	2.55612	0.0839813	697
SPTBN1	0.263989	0.658537	0.0774749	0.400871	0.117647	0.293478	0.358674	1.92857	0.0839813	697
UBR4_ENST00000375226	0.243902	0.687231	0.0688666	0.354906	0.100209	0.282353	0.322581	2.19725	0.0739599	697
ATP2B2_ENST00000360273	0.352011	0.613506	0.0344828	0.57377	0.0562061	0.0979592	0.543237	1.58736	0.0357143	696
IGSF1	0.212644	0.682471	0.104885	0.311579	0.153684	0.493243	0.270073	2.14932	0.117175	696
ITGA8	0.227011	0.70546	0.0675287	0.321792	0.095723	0.297468	0.29368	2.39512	0.0724191	696
LTBP2	0.274425	0.646552	0.079023	0.424444	0.122222	0.287958	0.378218	1.82927	0.0858034	696
PRSS3_ENST00000361005	0.172414	0.748563	0.079023	0.230326	0.105566	0.458333	0.208333	2.97714	0.0858034	696
ABCA2	0.302158	0.651799	0.0460432	0.463576	0.0706402	0.152381	0.43299	1.8719	0.0482655	695
ABCB5_ENST00000404938	0.185612	0.741007	0.0733813	0.250485	0.0990291	0.395349	0.227915	2.86111	0.0791925	695
ADAM29	0.201439	0.736691	0.0618705	0.273438	0.0839844	0.307143	0.252252	2.79781	0.0659509	695
GRIK2_ENST00000421544	0.215827	0.682014	0.102158	0.316456	0.149789	0.473333	0.275229	2.1448	0.113782	695
MYO9A	0.152518	0.755396	0.0920863	0.201905	0.121905	0.603774	0.179966	3.08824	0.101426	695
PAPPA2_ENST00000367661	0.214388	0.728058	0.057554	0.294466	0.0790514	0.268456	0.272894	2.67725	0.0610687	695
PCDHB5	0.315108	0.648921	0.0359712	0.485588	0.0554324	0.114155	0.460084	1.84836	0.0373134	695
TERT	0.348201	0.615827	0.0359712	0.565421	0.0584112	0.103306	0.534216	1.603	0.0373134	695
WNK1	0.231655	0.693525	0.0748201	0.334025	0.107884	0.322981	0.301498	2.26291	0.0808709	695
BAT2D1_ENST00000392078	0.190202	0.690202	0.119597	0.275574	0.173278	0.628788	0.234875	2.22791	0.135843	694
CASR	0.261183	0.681097	0.0577201	0.383475	0.0847458	0.220994	0.353516	2.13575	0.0612557	693
PKDREJ	0.233766	0.698413	0.0678211	0.334711	0.0971074	0.290123	0.305085	2.31579	0.0727554	693
RUNX1T1_ENST00000265814	0.186147	0.750361	0.0634921	0.248077	0.0846154	0.341085	0.228723	3.00578	0.0677966	693
YLPM1_ENST00000325680	0.189033	0.61039	0.200577	0.309693	0.328605	1.06107	0.233096	1.56667	0.250903	693
LOC65121	0.153179	0.773121	0.0736994	0.198131	0.0953271	0.481132	0.180887	3.40764	0.0795632	692
PCDHA7	0.290462	0.679191	0.0303468	0.42766	0.0446809	0.104478	0.409369	2.11712	0.0312966	692
PRAMEF1	0.153179	0.773121	0.0736994	0.198131	0.0953271	0.481132	0.180887	3.40764	0.0795632	692
RRBP1_ENST00000377813	0.241329	0.692197	0.066474	0.348643	0.0960334	0.275449	0.318095	2.24883	0.0712074	692
TSHZ2	0.273121	0.687861	0.0390173	0.397059	0.0567227	0.142857	0.375746	2.2037	0.0406015	692
CHD9	0.205499	0.681621	0.11288	0.301486	0.165605	0.549296	0.258652	2.14091	0.127243	691
FRMPD1	0.24602	0.677279	0.0767004	0.363248	0.113248	0.311765	0.326296	2.09865	0.0830721	691
SLC8A1	0.250362	0.698987	0.0506512	0.358178	0.0724638	0.202312	0.333977	2.32212	0.0533537	691
TRHDE	0.228654	0.713459	0.0578871	0.320487	0.0811359	0.253165	0.296435	2.4899	0.0614439	691
PCDHA9	0.362319	0.604348	0.0333333	0.59952	0.0551559	0.092	0.568182	1.52747	0.0344828	690
PTPRF	0.295652	0.668116	0.0362319	0.442516	0.0542299	0.122549	0.419753	2.0131	0.037594	690
TAS2R43	0.127536	0.834783	0.0376812	0.152778	0.0451389	0.295455	0.146179	5.05263	0.0391566	690
USP9X	0.168116	0.628986	0.202899	0.267281	0.322581	1.2069	0.202091	1.69531	0.254545	690
BAI1	0.281567	0.657475	0.0609579	0.428256	0.0927152	0.216495	0.391919	1.91949	0.064915	689
RHOA	0.0275762	0.946299	0.0261248	0.0291411	0.0276074	0.947368	0.0283582	17.6216	0.0268256	689
SPTAN1_ENST00000372739	0.313498	0.592163	0.0943396	0.529412	0.159314	0.300926	0.45666	1.45196	0.104167	689
CIT_ENST00000261833	0.251453	0.680233	0.068314	0.369658	0.100427	0.271676	0.335922	2.12727	0.0733229	688
ENSG00000205631	0.19214	0.800582	0.00727802	0.24	0.00909091	0.0378788	0.237838	4.0146	0.00733138	687
LAMA4	0.250364	0.681223	0.0684134	0.367521	0.100427	0.273256	0.333981	2.13699	0.0734375	687
NLRC5	0.257642	0.636099	0.106259	0.405034	0.167048	0.412429	0.347059	1.748	0.118893	687
PCDHB6	0.311499	0.647744	0.0407569	0.480899	0.0629213	0.130841	0.452431	1.83884	0.0424886	687
PTPRN2	0.327511	0.649199	0.0232897	0.504484	0.0358744	0.0711111	0.487013	1.85062	0.023845	687
MYO10	0.27551	0.622449	0.102041	0.442623	0.163934	0.37037	0.380282	1.64865	0.113636	686
SOX9	0.120991	0.411079	0.46793	0.294326	1.1383	3.86747	0.137645	0.69802	0.879452	686
CENPE	0.172263	0.722628	0.105109	0.238384	0.145455	0.610169	0.208113	2.60526	0.117455	685
ERCC2_ENST00000391945	0.275912	0.709489	0.0145985	0.388889	0.0205761	0.0529101	0.381048	2.44221	0.0148148	685
MED12_ENST00000333646	0.0934307	0.820438	0.0861314	0.113879	0.104982	0.921875	0.10306	4.56911	0.0942492	685
ABCA6	0.194444	0.676901	0.128655	0.287257	0.190065	0.661654	0.241379	2.09502	0.147651	684
MUC20	0.156433	0.821637	0.0219298	0.190391	0.0266904	0.140187	0.185442	4.60656	0.0224215	684
NBEAL2_ENST00000450053	0.266082	0.69152	0.0423977	0.384778	0.0613108	0.159341	0.36255	2.24171	0.0442748	684
SLC25A5	0.127193	0.761696	0.111111	0.166987	0.145873	0.873563	0.145729	3.19632	0.125	684
AR_ENST00000544984	0.163982	0.762811	0.0732064	0.214971	0.0959693	0.446429	0.196147	3.21605	0.0789889	683
EPB41L3	0.228404	0.683748	0.0878477	0.334047	0.12848	0.384615	0.296015	2.16204	0.0963082	683
RTL1	0.241581	0.713031	0.045388	0.338809	0.063655	0.187879	0.318533	2.48469	0.047546	683
UNC13A_ENST00000252773	0.265007	0.676428	0.0585652	0.391775	0.0865801	0.220994	0.360558	2.0905	0.0622084	683
ZNF91	0.185944	0.77306	0.0409956	0.24053	0.0530303	0.220472	0.228417	3.40645	0.0427481	683
ACVR2A	0.0542522	0.356305	0.589443	0.152263	1.65432	10.8649	0.0573643	0.553531	1.43571	682
COL4A1_ENST00000375815	0.259531	0.692082	0.0483871	0.375	0.0699153	0.186441	0.350495	2.24762	0.0508475	682
CHL1	0.209985	0.740088	0.0499266	0.28373	0.0674603	0.237762	0.265799	2.84746	0.0525502	681
FANCM	0.161527	0.698972	0.139501	0.231092	0.19958	0.863636	0.192644	2.32195	0.162116	681
KIAA1244	0.276065	0.67254	0.051395	0.41048	0.0764192	0.18617	0.381339	2.05381	0.0541796	681
NUP210	0.290749	0.650514	0.0587372	0.446953	0.0902935	0.20202	0.409938	1.86134	0.0624025	681
PCDHB4	0.254038	0.67254	0.0734214	0.377729	0.10917	0.289017	0.340551	2.05381	0.0792393	681
SIGLEC1_ENST00000202578	0.32746	0.628488	0.0440529	0.521028	0.0700935	0.134529	0.4869	1.6917	0.0460829	681
TERT_NM_198255.1	0.349486	0.613803	0.0367107	0.569378	0.0598086	0.105042	0.537246	1.58935	0.0381098	681
ABCA3	0.295588	0.644118	0.0602941	0.458904	0.0936073	0.20398	0.419624	1.80992	0.0641628	680
AGRN	0.244118	0.673529	0.0823529	0.362445	0.122271	0.337349	0.322957	2.06306	0.0897436	680
BAT2D1	0.192647	0.691176	0.116176	0.278723	0.168085	0.603053	0.238616	2.2381	0.131448	680
CADPS_ENST00000383710	0.251471	0.670588	0.0779412	0.375	0.116228	0.309942	0.335953	2.03571	0.0845295	680
DBC1	0.258824	0.685294	0.0558824	0.377682	0.0815451	0.215909	0.349206	2.17757	0.05919	680
GRM8_ENST00000358373	0.247059	0.698529	0.0544118	0.353684	0.0778947	0.220238	0.328125	2.31707	0.0575428	680
IL7R	0.139706	0.764706	0.0955882	0.182692	0.125	0.684211	0.162393	3.25	0.105691	680
EPG5	0.228277	0.699558	0.0721649	0.326316	0.103158	0.316129	0.295802	2.32843	0.0777778	679
TRPA1	0.182891	0.730088	0.0870206	0.250505	0.119192	0.475806	0.223827	2.70492	0.095315	678
C9orf79	0.264402	0.695716	0.0398818	0.380042	0.0573248	0.150838	0.359438	2.28641	0.0415385	677
DIP2C	0.274742	0.651403	0.0738552	0.421769	0.113379	0.268817	0.378819	1.86864	0.0797448	677
GRIA1	0.254062	0.695716	0.0502216	0.36518	0.0721868	0.197674	0.340594	2.28641	0.0528771	677
PCDHGA1	0.245199	0.707533	0.0472674	0.346555	0.0668058	0.192771	0.324853	2.41919	0.0496124	677
SEC16A_NM_014866.1	0.293944	0.623338	0.0827179	0.471564	0.132701	0.281407	0.416318	1.6549	0.0901771	677
SHROOM3	0.255539	0.686854	0.0576071	0.372043	0.083871	0.225434	0.343254	2.1934	0.0611285	677
TLL1	0.172821	0.757755	0.0694239	0.22807	0.0916179	0.401709	0.208929	3.12805	0.0746032	677
TTC3	0.180207	0.694239	0.125554	0.259574	0.180851	0.696721	0.21982	2.27053	0.143581	677
WNK2_ENST00000395477	0.288035	0.645495	0.0664697	0.446224	0.102975	0.230769	0.404564	1.82083	0.0712025	677
JARID2	0.414201	0.502959	0.0828402	0.823529	0.164706	0.2	0.707071	1.0119	0.0903226	676
KSR2	0.303254	0.647929	0.0488166	0.468037	0.0753425	0.160976	0.435244	1.84034	0.0513219	676
PLCB1_ENST00000378641	0.255917	0.68787	0.056213	0.372043	0.0817204	0.219653	0.343936	2.20379	0.0595611	676
RUNX1T1_ENST00000436581	0.183432	0.75	0.066568	0.244576	0.0887574	0.362903	0.224638	3	0.0713154	676
SLX4	0.251479	0.698225	0.0502959	0.360169	0.0720339	0.2	0.335968	2.31373	0.0529595	676
TNRC6B_ENST00000454349	0.244083	0.557692	0.198225	0.437666	0.355438	0.812121	0.322896	1.26087	0.247232	676
BAZ2B	0.180741	0.734815	0.0844444	0.245968	0.114919	0.467213	0.220615	2.77095	0.092233	675
CSF1R	0.220741	0.705185	0.0740741	0.313025	0.105042	0.33557	0.28327	2.39196	0.08	675
A2ML1	0.271513	0.672107	0.0563798	0.403974	0.0838852	0.20765	0.372709	2.04977	0.0597484	674
CIT_ENST00000392521	0.250742	0.683976	0.0652819	0.366594	0.0954447	0.260355	0.334653	2.16432	0.0698413	674
MDGA2_ENST00000399232	0.167656	0.743323	0.0890208	0.225549	0.11976	0.530973	0.201426	2.89595	0.0977199	674
PPFIA2_ENST00000333447	0.154303	0.735905	0.109792	0.209677	0.149194	0.711538	0.182456	2.78652	0.123333	674
IKZF1_ENST00000331340	0.246657	0.690936	0.0624071	0.356989	0.0903226	0.253012	0.327416	2.23558	0.066561	673
KIAA2018	0.199108	0.673105	0.127786	0.295806	0.189845	0.641791	0.248609	2.05909	0.146508	673
PRSS1	0.228826	0.756315	0.0148588	0.302554	0.0196464	0.0649351	0.296724	3.10366	0.015083	673
HCFC1_ENST00000310441	0.303571	0.668155	0.0282738	0.454343	0.0423163	0.0931373	0.435897	2.01345	0.0290965	672
ASCC3	0.159463	0.71237	0.128167	0.223849	0.179916	0.803738	0.189716	2.47668	0.147009	671
GRIK3	0.266766	0.691505	0.0417288	0.385776	0.0603448	0.156425	0.363821	2.24155	0.0435459	671
NPHS1	0.262295	0.692996	0.0447094	0.378495	0.0645161	0.170455	0.355556	2.25728	0.0468019	671
SEMA5A	0.272727	0.652757	0.0745156	0.417808	0.114155	0.273224	0.375	1.87983	0.0805153	671
SIPA1L1	0.226528	0.692996	0.0804769	0.326882	0.116129	0.355263	0.292871	2.25728	0.0875203	671
CACNA1F	0.237313	0.719403	0.0432836	0.329876	0.060166	0.18239	0.311155	2.56383	0.0452418	670
KAT6B	0.253731	0.679104	0.0671642	0.373626	0.0989011	0.264706	0.34	2.11628	0.072	670
CDH11	0.316891	0.641256	0.0418535	0.494172	0.0652681	0.132075	0.463895	1.7875	0.0436817	669
CEP192_ENST00000506447	0.180867	0.763827	0.0553064	0.236791	0.072407	0.305785	0.220803	3.23418	0.0585443	669
ANK2_ENST00000506722	0.241018	0.717066	0.0419162	0.336117	0.0584551	0.173913	0.317554	2.53439	0.04375	668
MECOM	0.217066	0.664671	0.118263	0.326577	0.177928	0.544828	0.277247	1.98214	0.134126	668
SETX_ENST00000372169	0.194611	0.723054	0.0823353	0.269151	0.113872	0.423077	0.241636	2.61081	0.0897227	668
USP9X_ENST00000324545	0.164671	0.625749	0.209581	0.263158	0.334928	1.27273	0.197133	1.672	0.265152	668
ENSG00000093100	0.287856	0.629685	0.0824588	0.457143	0.130952	0.286458	0.404211	1.7004	0.0898693	667
MYOF	0.203898	0.709145	0.0869565	0.287526	0.122622	0.426471	0.256121	2.43814	0.0952381	667
NTRK1	0.206897	0.749625	0.0434783	0.276	0.058	0.210145	0.26087	2.99401	0.0454545	667
ABCB11_ENST00000263817	0.325826	0.626126	0.048048	0.520384	0.0767386	0.147465	0.483296	1.6747	0.0504732	666
CNTN4_ENST00000418658	0.262763	0.665165	0.0720721	0.395034	0.108352	0.274286	0.356415	1.98655	0.0776699	666
NCAM2	0.211712	0.690691	0.0975976	0.306522	0.141304	0.460993	0.268571	2.23301	0.108153	666
NID2	0.193694	0.746246	0.0600601	0.259557	0.0804829	0.310078	0.240223	2.94083	0.0638978	666
RGPD4	0.135135	0.816817	0.048048	0.165441	0.0588235	0.355556	0.15625	4.45902	0.0504732	666
COL4A6	0.203008	0.72782	0.0691729	0.278926	0.0950413	0.340741	0.254717	2.67403	0.0743134	665
KIF26A	0.285714	0.609023	0.105263	0.469136	0.17284	0.368421	0.4	1.55769	0.117647	665
NLRP12	0.300752	0.654135	0.0451128	0.45977	0.0689655	0.15	0.430108	1.8913	0.0472441	665
NUP210L	0.204511	0.684211	0.111278	0.298901	0.162637	0.544118	0.257089	2.16667	0.125212	665
PLXNA3	0.273684	0.655639	0.0706767	0.417431	0.107798	0.258242	0.376812	1.90393	0.0760518	665
PPP2R1A	0.105422	0.858434	0.0361446	0.122807	0.0421053	0.342857	0.117845	6.06383	0.0375	664
RICTOR	0.131024	0.786145	0.0828313	0.166667	0.105364	0.632184	0.15078	3.67606	0.090312	664
EVC2	0.239819	0.698341	0.0618401	0.343413	0.0885529	0.257862	0.315476	2.315	0.0659164	663
PLCG1	0.161388	0.809955	0.0286576	0.199255	0.0353818	0.17757	0.192446	4.2619	0.0295031	663
IGSF9B_ENST00000321016	0.276435	0.60423	0.119335	0.4575	0.1975	0.431694	0.382046	1.52672	0.135506	662
PCDHB12	0.285498	0.669184	0.0453172	0.426637	0.0677201	0.15873	0.399577	2.02283	0.0474684	662
PCDHGA3_ENST00000253812	0.330816	0.622356	0.0468278	0.531553	0.0752427	0.141553	0.494357	1.648	0.0491284	662
PREX1_ENST00000396220	0.277946	0.68429	0.0377644	0.406181	0.0551876	0.13587	0.384937	2.16746	0.0392465	662
XDH	0.256798	0.697885	0.0453172	0.367965	0.0649351	0.176471	0.345528	2.31	0.0474684	662
PTCHD2_ENST00000389575	0.263238	0.683812	0.0529501	0.384956	0.0774336	0.201149	0.35729	2.16268	0.0559105	661
RUNX1T1	0.189107	0.74584	0.065053	0.25355	0.0872211	0.344	0.233209	2.93452	0.0695793	661
BAHCC1	0.281818	0.651515	0.0666667	0.432558	0.102326	0.236559	0.392405	1.86957	0.0714286	660
SEC16A	0.3	0.621212	0.0787879	0.482927	0.126829	0.262626	0.428571	1.64	0.0855263	660
ARHGEF17	0.212443	0.720789	0.0667678	0.294737	0.0926316	0.314286	0.26975	2.58152	0.0715447	659
EFCAB6	0.247344	0.691958	0.060698	0.357456	0.0877193	0.245399	0.328629	2.24631	0.0646204	659
NLRP2_ENST00000543010	0.338392	0.610015	0.0515933	0.554726	0.0845771	0.152466	0.511468	1.5642	0.0544	659
PRPF8	0.305008	0.632777	0.0622155	0.482014	0.0983213	0.20398	0.438865	1.72314	0.066343	659
PRRC2B	0.254932	0.655539	0.0895296	0.388889	0.136574	0.35119	0.342159	1.90308	0.0983333	659
NIN	0.214286	0.682371	0.103343	0.314031	0.151448	0.48227	0.272727	2.14833	0.115254	658
NLRP7_ENST00000446217	0.319149	0.621581	0.0592705	0.513447	0.0953545	0.185714	0.46875	1.64257	0.0630048	658
DIS3	0.214612	0.715373	0.0700152	0.3	0.0978723	0.326241	0.273256	2.51337	0.0752864	657
FSTL5	0.188737	0.716895	0.0943683	0.26327	0.131635	0.5	0.232645	2.53226	0.104202	657
GRIK2	0.217656	0.678843	0.103501	0.320628	0.152466	0.475524	0.27821	2.11374	0.11545	657
UNC5D_ENST00000404895	0.283105	0.6621	0.0547945	0.427586	0.0827586	0.193548	0.394904	1.95946	0.057971	657
C10orf71_ENST00000374144	0.240854	0.719512	0.0396341	0.334746	0.0550847	0.164557	0.317269	2.56522	0.0412698	656
GRIA2	0.256098	0.6875	0.0564024	0.372506	0.0820399	0.220238	0.344262	2.2	0.0597738	656
C5orf42	0.167939	0.734351	0.0977099	0.22869	0.133056	0.581818	0.201835	2.76437	0.108291	655
COL4A3	0.183206	0.763359	0.0534351	0.24	0.07	0.291667	0.224299	3.22581	0.0564516	655
PCDHB16	0.29313	0.677863	0.0290076	0.432432	0.0427928	0.0989583	0.414687	2.10427	0.0298742	655
CLSTN2	0.282875	0.674312	0.0428135	0.419501	0.0634921	0.151351	0.394456	2.07042	0.0447284	654
PRRC2B_ENST00000357304	0.255352	0.652905	0.0917431	0.391101	0.140515	0.359281	0.342916	1.88106	0.10101	654
TGFBR2_ENST00000359013	0.103976	0.683486	0.212538	0.152125	0.310962	2.04412	0.116041	2.15942	0.269903	654
AXL	0.143951	0.750383	0.105666	0.191837	0.140816	0.734043	0.168157	3.00613	0.118151	653
FHOD3	0.217458	0.63706	0.145482	0.341346	0.228365	0.669014	0.277886	1.75527	0.170251	653
NID1	0.271057	0.676876	0.0520674	0.400452	0.0769231	0.19209	0.371849	2.09479	0.0549273	653
POTEC	0.222052	0.756508	0.0214395	0.293522	0.0283401	0.0965517	0.285433	3.10692	0.0219092	653
RAI1	0.274119	0.623277	0.102603	0.439803	0.164619	0.374302	0.377637	1.65447	0.114334	653
RIF1	0.180704	0.699847	0.119449	0.258206	0.170678	0.661017	0.220561	2.33163	0.135652	653
SI_ENST00000264382	0.148545	0.754977	0.0964778	0.196755	0.127789	0.649485	0.17446	3.08125	0.10678	653
CASP8	0.0567485	0.607362	0.33589	0.0934343	0.55303	5.91892	0.0601626	1.54688	0.505774	652
EGFLAM	0.23773	0.687117	0.0751534	0.345982	0.109375	0.316129	0.311871	2.19608	0.0812604	652
MYOCD	0.231595	0.661043	0.107362	0.350348	0.162413	0.463576	0.301397	1.95023	0.120275	652
PRDM2	0.214724	0.656442	0.128834	0.327103	0.196262	0.6	0.273438	1.91071	0.147887	652
PDZRN4_ENST00000402685	0.22427	0.705069	0.0706605	0.318083	0.100218	0.315068	0.289109	2.39063	0.0760331	651
ZNF236	0.247312	0.645161	0.107527	0.383333	0.166667	0.434783	0.328571	1.81818	0.120482	651
ABCC11	0.278462	0.673846	0.0476923	0.413242	0.0707763	0.171271	0.385928	2.06604	0.0500808	650
MPDZ	0.230769	0.686154	0.0830769	0.336323	0.121076	0.36	0.3	2.18627	0.090604	650
PCDH19	0.290769	0.632308	0.0769231	0.459854	0.121655	0.26455	0.409978	1.71967	0.0833333	650
PIK3C2G_ENST00000538779	0.0892308	0.82	0.0907692	0.108818	0.110694	1.01724	0.097973	4.55556	0.0998308	650
POLD1	0.198767	0.733436	0.0677966	0.271008	0.092437	0.341085	0.248077	2.75145	0.0727273	649
ZC3H13	0.127889	0.639445	0.232666	0.2	0.363855	1.81928	0.146643	1.7735	0.303213	649
LRP5	0.320988	0.655864	0.0231481	0.489412	0.0352941	0.0721154	0.472727	1.90583	0.0236967	648
NLRP4_ENST00000587891	0.302469	0.640432	0.0570988	0.472289	0.0891566	0.188776	0.433628	1.78112	0.0605565	648
NTRK1_ENST00000392302	0.203704	0.753086	0.0432099	0.270492	0.057377	0.212121	0.255814	3.05	0.0451613	648
NUMA1	0.226852	0.685185	0.087963	0.331081	0.128378	0.387755	0.293413	2.17647	0.0964467	648
KIF21B_ENST00000422435	0.330757	0.616692	0.0525502	0.536341	0.085213	0.158879	0.494226	1.60887	0.0554649	647
PIK3R1_ENST00000336483	0.0432767	0.681607	0.275116	0.0634921	0.403628	6.35714	0.0452342	2.14078	0.379531	647
SEZ6L	0.290572	0.661515	0.0479134	0.439252	0.0724299	0.164894	0.409586	1.95434	0.0503247	647
TNRC6A	0.211747	0.707883	0.0803709	0.299127	0.113537	0.379562	0.268627	2.42328	0.087395	647
ATP10B	0.252322	0.701238	0.0464396	0.359823	0.0662252	0.184049	0.337474	2.34715	0.0487013	646
CTNNA3	0.205882	0.710526	0.0835913	0.28976	0.117647	0.406015	0.259259	2.45455	0.0912162	646
CTNNA3_ENST00000433211	0.208978	0.710526	0.0804954	0.294118	0.11329	0.385185	0.264188	2.45455	0.0875421	646
ENSG00000250423	0.20743	0.74613	0.0464396	0.278008	0.0622407	0.223881	0.261719	2.93902	0.0487013	646
GRIA2_ENST00000264426	0.250774	0.696594	0.0526316	0.36	0.0755556	0.209877	0.334711	2.29592	0.0555556	646
MORC1	0.212074	0.701238	0.0866873	0.302428	0.12362	0.408759	0.269155	2.34715	0.0949153	646
TLN1	0.229102	0.705882	0.0650155	0.324561	0.0921053	0.283784	0.297189	2.4	0.0695364	646
TMPRSS15	0.221362	0.704334	0.0743034	0.314286	0.105495	0.335664	0.284294	2.3822	0.0802676	646
FANCA	0.184496	0.747287	0.0682171	0.246888	0.0912863	0.369748	0.226236	2.95706	0.0732113	645
PIK3R1_ENST00000320694	0.0418605	0.682171	0.275969	0.0613636	0.404545	6.59259	0.0436893	2.14634	0.381156	645
RNF17_ENST00000255324	0.206202	0.706977	0.0868217	0.291667	0.122807	0.421053	0.259766	2.4127	0.0950764	645
ST18	0.204651	0.724031	0.0713178	0.282655	0.0985011	0.348485	0.25731	2.6236	0.0767947	645
CD163_ENST00000396620	0.256211	0.698758	0.0450311	0.366667	0.0644444	0.175758	0.344468	2.31959	0.0471545	644
DPYD	0.166407	0.768274	0.0653188	0.216599	0.0850202	0.392523	0.199627	3.31544	0.0698835	643
GRIA1_ENST00000544403	0.244168	0.712286	0.0435459	0.342795	0.0611354	0.178344	0.323045	2.47568	0.0455285	643
ITGB4	0.269051	0.640747	0.0902022	0.419903	0.140777	0.33526	0.368085	1.78355	0.0991453	643
PDZRN3	0.287714	0.66874	0.0435459	0.430233	0.0651163	0.151351	0.40393	2.01878	0.0455285	643
ZNF407	0.265941	0.664075	0.0699844	0.400468	0.105386	0.263158	0.362288	1.97685	0.0752508	643
ZNF429	0.26283	0.698289	0.0388802	0.376392	0.0556793	0.147929	0.35654	2.31443	0.0404531	643
RREB1	0.297508	0.649533	0.0529595	0.458034	0.0815348	0.17801	0.423503	1.85333	0.0559211	642
DCC_ENST00000412726	0.224649	0.703588	0.0717629	0.31929	0.101996	0.319444	0.289738	2.37368	0.0773109	641
DLGAP2_ENST00000356067	0.304212	0.650546	0.0452418	0.467626	0.0695444	0.148718	0.43722	1.86161	0.0473856	641
MBD5	0.25429	0.684867	0.0608424	0.371298	0.0888383	0.239264	0.341004	2.17327	0.0647841	641
ZNF318	0.184087	0.672387	0.143526	0.273782	0.213457	0.779661	0.225621	2.05238	0.167577	641
STXBP5L	0.179688	0.771875	0.0484375	0.232794	0.062753	0.269565	0.219048	3.38356	0.0509031	640
TLR4	0.229687	0.709375	0.0609375	0.323789	0.0859031	0.265306	0.298174	2.44086	0.0648918	640
TPO_ENST00000337415	0.284375	0.657813	0.0578125	0.432304	0.087886	0.203297	0.39738	1.92237	0.0613599	640
KCNQ3	0.256651	0.636933	0.106416	0.402948	0.167076	0.414634	0.345263	1.75431	0.119089	639
MLLT4_ENST00000366806	0.220657	0.625978	0.153365	0.3525	0.245	0.695035	0.283133	1.67364	0.181146	639
NRK_ENST00000428173	0.186228	0.70266	0.111111	0.265033	0.158129	0.596639	0.228846	2.36316	0.125	639
CCDC165	0.233542	0.691223	0.0752351	0.337868	0.108844	0.322148	0.304703	2.23858	0.0813559	638
COL2A1_ENST00000380518	0.184953	0.719436	0.0956113	0.257081	0.132898	0.516949	0.226923	2.56425	0.105719	638
EXPH5	0.213166	0.724138	0.0626959	0.294372	0.0865801	0.294118	0.270916	2.625	0.0668896	638
LATS2	0.173981	0.738245	0.0877743	0.235669	0.118896	0.504505	0.210626	2.82036	0.0962199	638
MECOM_ENST00000264674	0.224138	0.658307	0.117555	0.340476	0.178571	0.524476	0.288889	1.92661	0.133215	638
EZH2_ENST00000350995	0.0863422	0.789639	0.124019	0.109344	0.157058	1.43636	0.0945017	3.75373	0.141577	637
SON_ENST00000300278	0.3281	0.660911	0.010989	0.496437	0.0166271	0.0334928	0.488318	1.94907	0.0111111	637
ABCA8_ENST00000430352	0.287736	0.663522	0.0487421	0.433649	0.0734597	0.169399	0.403974	1.97196	0.0512397	636
ANO4	0.210692	0.710692	0.0786164	0.29646	0.110619	0.373134	0.266932	2.45652	0.0853242	636
COBL	0.265723	0.628931	0.105346	0.4225	0.1675	0.39645	0.361884	1.69492	0.11775	636
DPP10_ENST00000410059	0.207547	0.715409	0.077044	0.29011	0.107692	0.371212	0.261905	2.51381	0.0834753	636
KIAA0100	0.227987	0.696541	0.0754717	0.327314	0.108352	0.331034	0.295316	2.29534	0.0816327	636
KIAA1244_ENST00000251691	0.279874	0.669811	0.0503145	0.41784	0.0751174	0.179775	0.388646	2.02857	0.0529801	636
MAGI1_ENST00000402939	0.224843	0.720126	0.0550314	0.312227	0.0764192	0.244755	0.290061	2.57303	0.0582363	636
TIAM2	0.262579	0.687107	0.0503145	0.382151	0.0732265	0.191617	0.356077	2.19598	0.0529801	636
ABCC12	0.266142	0.683465	0.0503937	0.389401	0.0737327	0.189349	0.362661	2.1592	0.053068	635
ARHGAP5	0.228346	0.611024	0.16063	0.373711	0.262887	0.703448	0.295918	1.57085	0.19137	635
ARMC4	0.211024	0.719685	0.0692913	0.293217	0.0962801	0.328358	0.267465	2.56742	0.0744501	635
COL6A3_ENST00000392004	0.294488	0.674016	0.0314961	0.436916	0.046729	0.106952	0.417411	2.06763	0.0325203	635
DCHS2_ENST00000339452	0.256693	0.705512	0.0377953	0.363839	0.0535714	0.147239	0.345339	2.39572	0.0392799	635
MAP2K3_ENST00000316920	0.269291	0.674016	0.0566929	0.399533	0.0841121	0.210526	0.368534	2.06763	0.0601002	635
AQP7_ENST00000539936	0.200315	0.782334	0.0173502	0.256048	0.0221774	0.0866142	0.250493	3.5942	0.0176565	634
MYO9B_ENST00000319396	0.268139	0.70347	0.0283912	0.381166	0.0403587	0.105882	0.366379	2.37234	0.0292208	634
NIN_ENST00000245441	0.214511	0.676656	0.108833	0.317016	0.160839	0.507353	0.273092	2.09268	0.122124	634
PCDHA5_ENST00000529619	0.321767	0.649842	0.0283912	0.495146	0.0436893	0.0882353	0.474419	1.85586	0.0292208	634
PLXND1	0.350158	0.602524	0.0473186	0.581152	0.078534	0.135135	0.538835	1.51587	0.0496689	634
PTPRN2_ENST00000404321	0.332808	0.643533	0.0236593	0.517157	0.0367647	0.07109	0.498818	1.80531	0.0242326	634
RTTN	0.217666	0.682965	0.0993691	0.318707	0.145497	0.456522	0.278226	2.15423	0.110333	634
MYH14_ENST00000440075	0.270142	0.693523	0.0363349	0.389522	0.0523918	0.134503	0.37013	2.26289	0.0377049	633
MYOCD_ENST00000425538	0.219589	0.672986	0.107425	0.326291	0.159624	0.489209	0.281377	2.05797	0.120354	633
PCDHB10	0.323855	0.64455	0.0315956	0.502451	0.0490196	0.097561	0.478972	1.81333	0.0326264	633
PPL	0.278041	0.64297	0.0789889	0.432432	0.12285	0.284091	0.38512	1.80088	0.0857633	633
SHANK2	0.2891	0.674566	0.0363349	0.428571	0.0538642	0.125683	0.406667	2.07282	0.0377049	633
STARD9_ENST00000290607	0.210111	0.723539	0.0663507	0.290393	0.0917031	0.315789	0.266	2.61714	0.071066	633
WDR17	0.199052	0.737757	0.0631912	0.269807	0.0856531	0.31746	0.248521	2.81325	0.0674536	633
C20orf26	0.25	0.685127	0.0648734	0.364896	0.0946882	0.259494	0.333333	2.17588	0.0693739	632
TRIP12	0.204114	0.648734	0.147152	0.314634	0.226829	0.72093	0.256461	1.84685	0.172542	632
CDH6	0.263074	0.670365	0.066561	0.392435	0.0992908	0.253012	0.356989	2.03365	0.0713073	631
CTTNBP2	0.18542	0.751189	0.0633914	0.246835	0.0843882	0.34188	0.227626	3.01911	0.0676819	631
PIKFYVE	0.202853	0.730586	0.066561	0.277657	0.0911063	0.328125	0.254473	2.71176	0.0713073	631
PLCE1_ENST00000371375	0.22187	0.695721	0.0824089	0.318907	0.118451	0.371429	0.285132	2.28646	0.08981	631
ADAMTS5	0.261905	0.684127	0.0539683	0.382831	0.0788863	0.206061	0.354839	2.16583	0.057047	630
BCL9L	0.211111	0.555556	0.233333	0.38	0.42	1.10526	0.267606	1.25	0.304348	630
CHD8_ENST00000430710	0.146032	0.706349	0.147619	0.206742	0.208989	1.01087	0.171004	2.40541	0.173184	630
JMJD1C_ENST00000399262	0.177778	0.711111	0.111111	0.25	0.15625	0.625	0.216216	2.46154	0.125	630
NFASC_ENST00000339876	0.225397	0.680952	0.0936508	0.331002	0.137529	0.415493	0.290984	2.13433	0.103327	630
PRR12_ENST00000418929	0.252381	0.657143	0.0904762	0.384058	0.137681	0.358491	0.33758	1.91667	0.0994764	630
PTPRK	0.203175	0.701587	0.0952381	0.289593	0.135747	0.46875	0.25498	2.35106	0.105263	630
AGBL1	0.257552	0.683625	0.0588235	0.376744	0.0860465	0.228395	0.346895	2.1608	0.0625	629
KCNT1	0.321145	0.63911	0.0397456	0.502488	0.0621891	0.123762	0.473068	1.77093	0.0413907	629
NDST4	0.187599	0.72337	0.0890302	0.259341	0.123077	0.474576	0.23092	2.61494	0.0977312	629
NIN_ENST00000382041	0.217806	0.675676	0.106518	0.322353	0.157647	0.489051	0.278455	2.08333	0.119217	629
SBF1	0.27027	0.648649	0.0810811	0.416667	0.125	0.3	0.37037	1.84615	0.0882353	629
TRPM1	0.260731	0.659777	0.0794913	0.395181	0.120482	0.304878	0.352688	1.93925	0.0863558	629
ADCY1	0.262739	0.703822	0.0334395	0.373303	0.0475113	0.127273	0.356371	2.37634	0.0345964	628
ALPK3	0.257962	0.670382	0.0716561	0.384798	0.106888	0.277778	0.347639	2.03382	0.077187	628
CCDC88C	0.296178	0.66879	0.0350318	0.442857	0.052381	0.11828	0.420814	2.01923	0.0363036	628
FAM83B	0.184713	0.72293	0.0923567	0.255507	0.127753	0.5	0.226563	2.6092	0.101754	628
PCNX	0.19586	0.707006	0.0971338	0.277027	0.137387	0.495935	0.243564	2.41304	0.107584	628
PLEKHG4B_ENST00000283426	0.286624	0.654459	0.0589172	0.437956	0.0900243	0.205556	0.401786	1.89401	0.0626058	628
TAF1	0.117834	0.81051	0.0716561	0.145383	0.0884086	0.608108	0.133574	4.27731	0.077187	628
TCF7L2_ENST00000543371	0.138535	0.585987	0.275478	0.236413	0.470109	1.98851	0.160813	1.41538	0.38022	628
CADPS	0.22488	0.688995	0.0861244	0.326389	0.125	0.382979	0.290123	2.21538	0.0942408	627
COL4A5_ENST00000328300	0.22807	0.717703	0.0542265	0.317778	0.0755556	0.237762	0.295455	2.54237	0.0573356	627
PCDHA11	0.357257	0.604466	0.0382775	0.591029	0.0633245	0.107143	0.555831	1.52823	0.039801	627
POM121L12	0.328549	0.647528	0.0239234	0.507389	0.0369458	0.0728155	0.489311	1.8371	0.0245098	627
TUBGCP6	0.323764	0.623604	0.0526316	0.519182	0.084399	0.162562	0.478774	1.65678	0.0555556	627
DLGAP2	0.301917	0.65016	0.0479233	0.464373	0.0737101	0.15873	0.432494	1.85845	0.0503356	626
KNDC1_ENST00000368572	0.338658	0.619808	0.0415335	0.546392	0.0670103	0.122642	0.512077	1.63025	0.0433333	626
SCRIB	0.247604	0.674121	0.0782748	0.367299	0.116114	0.316129	0.329087	2.06863	0.084922	626
CHD3	0.1728	0.7056	0.1216	0.244898	0.172336	0.703704	0.208897	2.39674	0.138434	625
COL6A2	0.2912	0.6848	0.024	0.425234	0.0350467	0.0824176	0.410835	2.17259	0.0245902	625
LAMB4_ENST00000388780	0.2192	0.6992	0.0816	0.313501	0.116705	0.372263	0.280738	2.32447	0.0888502	625
PLXNB1	0.2352	0.68	0.0848	0.345882	0.124706	0.360544	0.307531	2.125	0.0926573	625
TET3	0.3616	0.5488	0.0896	0.658892	0.163265	0.247788	0.566416	1.21631	0.0984183	625
BRD4_ENST00000263377	0.166667	0.778846	0.0544872	0.213992	0.0699588	0.326923	0.2	3.52174	0.0576271	624
BRWD3	0.179487	0.721154	0.099359	0.248889	0.137778	0.553571	0.21875	2.58621	0.11032	624
DOCK11	0.176282	0.719551	0.104167	0.244989	0.144766	0.590909	0.214008	2.56571	0.116279	624
FOXA1	0.099359	0.75	0.150641	0.132479	0.200855	1.51613	0.11032	3	0.177358	624
MYO9B	0.272873	0.699839	0.0272873	0.389908	0.0389908	0.1	0.375276	2.33155	0.0280528	623
A2M	0.254019	0.692926	0.0530547	0.366589	0.0765661	0.208861	0.340517	2.25654	0.0560272	622
DROSHA	0.14791	0.758842	0.0932476	0.194915	0.122881	0.630435	0.173585	3.14667	0.102837	622
RREB1_ENST00000379938	0.305466	0.636656	0.0578778	0.479798	0.0909091	0.189474	0.439815	1.75221	0.0614334	622
SBF1_ENST00000380817	0.268489	0.652733	0.0787781	0.41133	0.12069	0.293413	0.367033	1.87963	0.0855148	622
ADCY10	0.259259	0.660225	0.0805153	0.392683	0.121951	0.310559	0.35	1.94313	0.0875657	621
ATP8A2	0.235105	0.723027	0.041868	0.325167	0.0579065	0.178082	0.307368	2.61047	0.0436975	621
COL11A2	0.222222	0.711755	0.0660225	0.312217	0.0927602	0.297101	0.285714	2.46927	0.0706897	621
DLG5	0.283414	0.68438	0.0322061	0.414118	0.0470588	0.113636	0.395506	2.16837	0.0332779	621
DOCK10_ENST00000409592	0.215781	0.710145	0.0740741	0.303855	0.104308	0.343284	0.275154	2.45	0.08	621
FILIP1	0.227053	0.677939	0.0950081	0.334917	0.140143	0.41844	0.29375	2.105	0.104982	621
NES	0.217391	0.666667	0.115942	0.326087	0.173913	0.533333	0.277778	2	0.131148	621
NYNRIN	0.270531	0.63124	0.0982287	0.428571	0.155612	0.363095	0.370861	1.71179	0.108929	621
CABIN1	0.232258	0.714516	0.0532258	0.325056	0.0744921	0.229167	0.302521	2.50282	0.0562181	620
CASC5_ENST00000346991	0.177419	0.71129	0.11129	0.249433	0.156463	0.627273	0.215686	2.46369	0.125227	620
CDH7	0.235484	0.722581	0.0419355	0.325893	0.0580357	0.178082	0.308017	2.60465	0.043771	620
KIAA1486	0.279032	0.667742	0.0532258	0.417874	0.0797101	0.190751	0.387025	2.00971	0.0562181	620
LRP4	0.212903	0.712903	0.0741935	0.298643	0.104072	0.348485	0.270492	2.48315	0.0801394	620
PDE3A	0.214516	0.696774	0.0887097	0.30787	0.127315	0.413534	0.273101	2.29787	0.0973451	620
EPHA3_ENST00000452448	0.124394	0.767367	0.108239	0.162105	0.141053	0.87013	0.142066	3.29861	0.121377	619
MAML3	0.368336	0.576737	0.0549273	0.638655	0.0952381	0.149123	0.58312	1.3626	0.0581197	619
SNRNP200	0.319871	0.638126	0.0420032	0.501266	0.0658228	0.131313	0.470309	1.76339	0.0438449	619
TMEM132C_ENST00000435159	0.281099	0.678514	0.0403877	0.414286	0.0595238	0.143678	0.391011	2.11055	0.0420875	619
TRPC4	0.232633	0.717286	0.0500808	0.324324	0.0698198	0.215278	0.303158	2.53714	0.0527211	619
TRPC4_ENST00000379681	0.231018	0.720517	0.0484653	0.320628	0.0672646	0.20979	0.30042	2.57803	0.0509338	619
GRM6	0.346278	0.592233	0.0614887	0.584699	0.103825	0.17757	0.529703	1.45238	0.0655172	618
INADL	0.192557	0.687702	0.119741	0.28	0.174118	0.621849	0.238477	2.20207	0.136029	618
LRRC4C	0.250809	0.694175	0.0550162	0.361305	0.0792541	0.219355	0.334773	2.26984	0.0582192	618
MYO9A_ENST00000424560	0.144013	0.760518	0.0954693	0.189362	0.125532	0.662921	0.168242	3.17568	0.105546	618
PHF3	0.195793	0.682848	0.121359	0.28673	0.177725	0.619835	0.243461	2.15306	0.138122	618
SLC12A5	0.289644	0.661812	0.0485437	0.437653	0.0733496	0.167598	0.407745	1.95694	0.0510204	618
EGFLAM_ENST00000354891	0.241491	0.687196	0.0713128	0.351415	0.103774	0.295302	0.318376	2.19689	0.0767888	617
FAM123C	0.267423	0.659643	0.0729335	0.405405	0.110565	0.272727	0.365044	1.9381	0.0786713	617
SCN8A	0.249595	0.690438	0.0599676	0.361502	0.0868545	0.24026	0.332613	2.23037	0.0637931	617
LMO7_ENST00000357063	0.196429	0.691558	0.112013	0.284038	0.161972	0.570248	0.244444	2.24211	0.126143	616
POLD1_ENST00000440232	0.207792	0.720779	0.0714286	0.288288	0.0990991	0.34375	0.262295	2.5814	0.0769231	616
PRRC2A	0.207792	0.683442	0.108766	0.304038	0.159145	0.523438	0.262295	2.15897	0.12204	616
COL1A1	0.214634	0.718699	0.0666667	0.298643	0.0927602	0.310606	0.273292	2.55491	0.0714286	615
FGFR2_ENST00000457416	0.118699	0.829268	0.0520325	0.143137	0.0627451	0.438356	0.134686	4.85714	0.0548885	615
PZP_ENST00000381997	0.237398	0.721951	0.0406504	0.328829	0.0563063	0.171233	0.311301	2.59649	0.0423729	615
AUTS2	0.2557	0.68241	0.0618893	0.374702	0.0906921	0.242038	0.343545	2.14872	0.0659722	614
CDH7_ENST00000323011	0.234528	0.723127	0.0423453	0.324324	0.0585586	0.180556	0.306383	2.61176	0.0442177	614
DGKI	0.23127	0.690554	0.0781759	0.334906	0.113208	0.338028	0.300847	2.23158	0.0848057	614
MED13	0.19544	0.71987	0.0846906	0.271493	0.117647	0.433333	0.242915	2.56977	0.0925267	614
MPDZ_ENST00000541718	0.228013	0.688925	0.0830619	0.330969	0.120567	0.364286	0.295359	2.21466	0.0905861	614
MSH2	0.105863	0.57329	0.320847	0.184659	0.559659	3.03077	0.118397	1.34351	0.472422	614
RICTOR_ENST00000296782	0.128664	0.788274	0.0830619	0.163223	0.105372	0.64557	0.147664	3.72308	0.0905861	614
ADAMTS19	0.192496	0.734095	0.0734095	0.262222	0.1	0.381356	0.238384	2.76074	0.0792254	613
DPP10	0.202284	0.722675	0.0750408	0.27991	0.103837	0.370968	0.253579	2.60588	0.0811287	613
HCFC1	0.301794	0.673736	0.0244698	0.447942	0.0363196	0.0810811	0.432243	2.065	0.0250836	613
INSRR_ENST00000368195	0.280587	0.668842	0.050571	0.419512	0.0756098	0.180233	0.390023	2.0197	0.0532646	613
TIE1	0.280587	0.665579	0.0538336	0.421569	0.0808824	0.19186	0.390023	1.99024	0.0568966	613
ARID5B	0.186275	0.668301	0.145425	0.278729	0.217604	0.780702	0.228916	2.01478	0.170172	612
CENPE_ENST00000265148	0.171569	0.71732	0.111111	0.23918	0.154897	0.647619	0.207101	2.53757	0.125	612
KDM5C_ENST00000452825	0.116013	0.681373	0.202614	0.170264	0.297362	1.74648	0.131238	2.13846	0.254098	612
MSH3_ENST00000265081	0.168301	0.679739	0.151961	0.247596	0.223558	0.902913	0.202358	2.12245	0.179191	612
MYO10_ENST00000513610	0.28268	0.617647	0.0996732	0.457672	0.161376	0.352601	0.394077	1.61538	0.110708	612
NCOA3	0.264706	0.668301	0.0669935	0.396088	0.100244	0.253086	0.36	2.01478	0.0718039	612
PLCL1	0.194444	0.723856	0.0816993	0.268623	0.112867	0.420168	0.241379	2.6213	0.088968	612
ERC2	0.253682	0.674304	0.0720131	0.376214	0.106796	0.283871	0.339912	2.07035	0.0776014	611
FRMPD4_ENST00000429478	0.245499	0.690671	0.0638298	0.35545	0.0924171	0.26	0.32538	2.2328	0.0681818	611
NUP205	0.248773	0.649755	0.101473	0.382872	0.156171	0.407895	0.331155	1.85514	0.112933	611
PCDHA10_ENST00000505235	0.288052	0.680851	0.0310966	0.423077	0.0456731	0.107955	0.404598	2.13333	0.0320946	611
RBMXL3	0.304419	0.675941	0.0196399	0.450363	0.0290557	0.0645161	0.437647	2.08586	0.0200334	611
RGPD3_ENST00000304514	0.160393	0.782324	0.0572831	0.205021	0.0732218	0.357143	0.191033	3.59398	0.0607639	611
SPTBN1_ENST00000333896	0.266776	0.649755	0.0834697	0.410579	0.128463	0.312883	0.363839	1.85514	0.0910714	611
LRRK1_ENST00000284395	0.322951	0.622951	0.0540984	0.518421	0.0868421	0.167513	0.476998	1.65217	0.0571924	610
QRICH2	0.25082	0.709836	0.0393443	0.353349	0.0554273	0.156863	0.334792	2.44633	0.0409556	610
LAMB1	0.203612	0.696223	0.100164	0.292453	0.143868	0.491935	0.25567	2.29189	0.111314	609
MAML3_ENST00000509479	0.372742	0.573071	0.0541872	0.65043	0.0945559	0.145374	0.594241	1.34231	0.0572917	609
PRDM16	0.292282	0.674877	0.0328407	0.43309	0.0486618	0.11236	0.412993	2.07576	0.0339559	609
RGPD3	0.16092	0.781609	0.0574713	0.205882	0.0735294	0.357143	0.191781	3.57895	0.0609756	609
SETD1A	0.249589	0.681445	0.0689655	0.366265	0.101205	0.276316	0.332604	2.13918	0.0740741	609
TNFAIP3	0.10509	0.499179	0.395731	0.210526	0.792763	3.76563	0.117431	0.996721	0.654891	609
YLPM1	0.183908	0.605911	0.210181	0.303523	0.346883	1.14286	0.225352	1.5375	0.266112	609
ARAP2	0.210526	0.692434	0.0970395	0.304038	0.140143	0.460938	0.266667	2.25134	0.107468	608
COL4A3_ENST00000328380	0.184211	0.759868	0.0559211	0.242424	0.0735931	0.303571	0.225806	3.16438	0.0592334	608
ERC2_ENST00000288221	0.251645	0.680921	0.0674342	0.369565	0.0990338	0.267974	0.336264	2.13402	0.0723104	608
JMJD1C	0.174342	0.713816	0.111842	0.24424	0.156682	0.641509	0.211155	2.49425	0.125926	608
MLH1	0.100329	0.638158	0.261513	0.157216	0.409794	2.60656	0.111517	1.76364	0.35412	608
NAV2_ENST00000540292	0.28125	0.672697	0.0460526	0.418093	0.0684597	0.163743	0.391304	2.05528	0.0482759	608
PCDHB2	0.335526	0.616776	0.0476974	0.544	0.0773333	0.142157	0.50495	1.60944	0.0500864	608
RPTN	0.202303	0.71875	0.0789474	0.281465	0.10984	0.390244	0.253608	2.55556	0.0857143	608
SYCP2	0.146382	0.662829	0.190789	0.220844	0.287841	1.30337	0.171484	1.96585	0.235772	608
TAS2R31	0.190789	0.78125	0.0279605	0.244211	0.0357895	0.146552	0.235772	3.57143	0.0287648	608
AKAP12	0.268534	0.650741	0.0807249	0.412658	0.124051	0.300613	0.367117	1.86321	0.0878136	607
FCRL5	0.243822	0.719934	0.0362438	0.338673	0.0503432	0.148649	0.32244	2.57059	0.0376068	607
KCND2	0.247117	0.660626	0.092257	0.374065	0.139651	0.373333	0.328228	1.9466	0.101633	607
KCNU1	0.252059	0.675453	0.0724876	0.373171	0.107317	0.287582	0.337004	2.08122	0.0781528	607
MYOM3	0.301483	0.640857	0.0576606	0.470437	0.0899743	0.191257	0.431604	1.7844	0.0611888	607
ACTN2	0.29703	0.643564	0.0594059	0.461538	0.0923077	0.2	0.422535	1.80556	0.0631579	606
CCDC88C_ENST00000389857	0.29538	0.668317	0.0363036	0.441975	0.054321	0.122905	0.419204	2.01493	0.0376712	606
CNTN3	0.249175	0.679868	0.0709571	0.366505	0.104369	0.284768	0.331868	2.12371	0.0763766	606
NFASC	0.232673	0.673267	0.0940594	0.345588	0.139706	0.404255	0.303226	2.06061	0.103825	606
PCDHB11	0.278878	0.663366	0.0577558	0.420398	0.0870647	0.207101	0.386728	1.97059	0.061296	606
SCRIB_ENST00000356994	0.245875	0.678218	0.0759076	0.36253	0.111922	0.308725	0.326039	2.10769	0.0821429	606
MUC21	0.259504	0.732231	0.00826446	0.354402	0.0112867	0.0318471	0.350446	2.73457	0.00833333	605
PCDHB15	0.310744	0.661157	0.0280992	0.47	0.0425	0.0904255	0.450839	1.95122	0.0289116	605
SMARCB1	0.0844371	0.460265	0.455298	0.183453	0.989209	5.39216	0.0922242	0.852761	0.835866	604
ATRNL1	0.202322	0.708126	0.0895522	0.285714	0.126464	0.442623	0.253638	2.42614	0.0983607	603
BCL9_ENST00000234739	0.243781	0.605307	0.150912	0.40274	0.249315	0.619048	0.322368	1.53361	0.177734	603
FGD5_ENST00000285046	0.271973	0.693201	0.0348259	0.392344	0.0502392	0.128049	0.373576	2.25946	0.0360825	603
FLRT2	0.296849	0.66335	0.039801	0.4475	0.06	0.134078	0.42217	1.97044	0.0414508	603
LATS1_ENST00000253339	0.0862355	0.706468	0.207297	0.122066	0.293427	2.40385	0.0943739	2.40678	0.261506	603
PCDHGA5_ENST00000518069	0.338308	0.640133	0.0215589	0.528497	0.0336788	0.0637255	0.511278	1.7788	0.0220339	603
PRSS3_ENST00000429677	0.154229	0.762852	0.0829187	0.202174	0.108696	0.537634	0.182353	3.21678	0.0904159	603
SLIT1	0.280265	0.668325	0.0514096	0.419355	0.0769231	0.183432	0.389401	2.015	0.0541958	603
TP53BP1	0.167496	0.701493	0.131012	0.238771	0.186761	0.782178	0.201195	2.35	0.150763	603
CBLB	0.490033	0.456811	0.0531561	1.07273	0.116364	0.108475	0.960912	0.840979	0.0561404	602
FSCB	0.172757	0.770764	0.0564784	0.224138	0.0732759	0.326923	0.208835	3.36232	0.0598592	602
HEATR5B	0.199336	0.715947	0.0847176	0.278422	0.118329	0.425	0.248963	2.52047	0.092559	602
MED13L	0.234219	0.724252	0.0415282	0.323394	0.0573394	0.177305	0.305857	2.62651	0.0433276	602
PLXNB3	0.247508	0.677741	0.0747508	0.365196	0.110294	0.302013	0.328918	2.10309	0.0807899	602
ABCA9	0.21797	0.685524	0.0965058	0.317961	0.140777	0.442748	0.278723	2.17989	0.106814	601
CDH2	0.246256	0.710483	0.0432612	0.346604	0.0608899	0.175676	0.326711	2.45402	0.0452174	601
CTBP2	0.242928	0.703827	0.0532446	0.345154	0.0756501	0.219178	0.320879	2.3764	0.056239	601
DNAH6_ENST00000398278	0.186356	0.745424	0.0682196	0.25	0.0915179	0.366071	0.229039	2.9281	0.0732143	601
KCNT2_ENST00000367431	0.241265	0.665557	0.093178	0.3625	0.14	0.386207	0.317982	1.99005	0.102752	601
LILRB1	0.282862	0.667221	0.0499168	0.42394	0.074813	0.176471	0.394432	2.005	0.0525394	601
MYO18A_ENST00000527372	0.25624	0.690516	0.0532446	0.371084	0.0771084	0.207792	0.344519	2.23118	0.056239	601
PLCL1_ENST00000428675	0.191348	0.727121	0.0815308	0.263158	0.112128	0.426087	0.236626	2.66463	0.0887681	601
USP29	0.176373	0.730449	0.093178	0.241458	0.127563	0.528302	0.214141	2.70988	0.102752	601
COL2A1	0.183333	0.725	0.0916667	0.252874	0.126437	0.5	0.22449	2.63636	0.100917	600
GRLF1_ENST00000317082	0.168333	0.621667	0.21	0.270777	0.337802	1.24752	0.202405	1.64317	0.265823	600
INSRR	0.283333	0.668333	0.0483333	0.42394	0.0723192	0.170588	0.395349	2.01508	0.0507881	600
OGDHL	0.285	0.676667	0.0383333	0.421182	0.0566502	0.134503	0.398601	2.09278	0.0398614	600
PCDHGA6_ENST00000517434	0.301667	0.656667	0.0416667	0.459391	0.0634518	0.138122	0.431981	1.91262	0.0434783	600
TANC1	0.231667	0.695	0.0733333	0.333333	0.105516	0.316547	0.301518	2.27869	0.0791367	600
LATS2_ENST00000382592	0.171953	0.747913	0.0801336	0.229911	0.107143	0.466019	0.207661	2.96689	0.0871143	599
RALGAPA2	0.265442	0.63773	0.096828	0.41623	0.151832	0.36478	0.361364	1.76037	0.107209	599
TULP4	0.27379	0.651085	0.0751252	0.420513	0.115385	0.27439	0.377011	1.86603	0.0812274	599
ABCC1	0.319398	0.628763	0.0518395	0.507979	0.0824468	0.162304	0.469287	1.69369	0.0546737	598
KCNH8	0.200669	0.717391	0.0819398	0.27972	0.114219	0.408333	0.251046	2.53846	0.0892532	598
ESPL1	0.261307	0.671692	0.0670017	0.389027	0.0997506	0.25641	0.353741	2.04592	0.0718133	597
FGFR2_ENST00000351936	0.120603	0.829146	0.0502513	0.145455	0.0606061	0.416667	0.137143	4.85294	0.0529101	597
KDM6B	0.229481	0.708543	0.0619765	0.323877	0.0874704	0.270073	0.297826	2.43103	0.0660714	597
RGPD4_ENST00000354986	0.127303	0.825796	0.0469012	0.154158	0.0567951	0.368421	0.145873	4.74038	0.0492091	597
SCN8A_ENST00000354534	0.251256	0.688442	0.0603015	0.364964	0.0875912	0.24	0.33557	2.20968	0.0641711	597
GOLGA3	0.288591	0.657718	0.0536913	0.438776	0.0816327	0.186047	0.40566	1.92157	0.0567376	596
NPC1L1	0.281879	0.676174	0.0419463	0.416873	0.0620347	0.14881	0.392523	2.08808	0.0437828	596
AFF2_ENST00000286437	0.221849	0.746218	0.0319328	0.297297	0.0427928	0.143939	0.285097	2.9404	0.0329861	595
FAM5B	0.267227	0.678992	0.0537815	0.393564	0.0792079	0.201258	0.364679	2.11518	0.0568384	595
FAT4_ENST00000335110	0.252101	0.695798	0.0521008	0.362319	0.0748792	0.206667	0.337079	2.28729	0.0549645	595
TANC2	0.191597	0.736134	0.0722689	0.260274	0.0981735	0.377193	0.237006	2.78981	0.0778986	595
COL4A6_ENST00000394872	0.20202	0.727273	0.0707071	0.277778	0.0972222	0.35	0.253165	2.66667	0.076087	594
TCF7L2	0.151515	0.569024	0.279461	0.266272	0.491124	1.84444	0.178571	1.32031	0.38785	594
WDR90	0.299663	0.653199	0.047138	0.458763	0.0721649	0.157303	0.427885	1.8835	0.04947	594
ATP13A5	0.217538	0.733558	0.0489039	0.296552	0.0666667	0.224806	0.278017	2.75316	0.0514184	593
BRWD1_ENST00000333229	0.158516	0.688027	0.153457	0.230392	0.223039	0.968085	0.188377	2.20541	0.181275	593
GRM1_ENST00000392299	0.264755	0.664418	0.0708263	0.398477	0.106599	0.267516	0.360092	1.9799	0.076225	593
PI4KA_ENST00000255882	0.291737	0.632378	0.0758853	0.461333	0.12	0.260116	0.411905	1.72018	0.0821168	593
PTPRM	0.254637	0.696459	0.0489039	0.365617	0.0702179	0.192053	0.341629	2.29444	0.0514184	593
ABCA10	0.182432	0.660473	0.157095	0.276215	0.237852	0.861111	0.22314	1.94527	0.186373	592
LATS1_ENST00000543571	0.0878378	0.704392	0.20777	0.1247	0.294964	2.36538	0.0962963	2.38286	0.26226	592
PRX	0.263514	0.677365	0.0591216	0.389027	0.0872818	0.224359	0.357798	2.09948	0.0628366	592
AHCTF1	0.175973	0.683587	0.14044	0.257426	0.205446	0.798077	0.213552	2.16043	0.163386	591
DNAJC13_ENST00000260818	0.211506	0.700508	0.0879865	0.301932	0.125604	0.416	0.26824	2.33898	0.096475	591
DOCK1	0.274112	0.695431	0.0304569	0.394161	0.0437956	0.111111	0.377622	2.28333	0.0314136	591
FLNB_ENST00000357272	0.3	0.630508	0.0694915	0.475806	0.110215	0.231638	0.428571	1.70642	0.0746812	590
GON4L_ENST00000368331	0.235593	0.650847	0.113559	0.361979	0.174479	0.482014	0.308204	1.86408	0.128107	590
HEPH	0.228814	0.694915	0.0762712	0.329268	0.109756	0.333333	0.296703	2.27778	0.0825688	590
HJURP	0.149153	0.815254	0.0355932	0.182952	0.043659	0.238636	0.175299	4.41284	0.0369069	590
ITGB4_ENST00000339591	0.274576	0.647458	0.0779661	0.424084	0.120419	0.283951	0.378505	1.83654	0.0845588	590
COL20A1	0.302207	0.636672	0.0611205	0.474667	0.096	0.202247	0.43309	1.75234	0.0650995	589
CRB1_ENST00000535699	0.227504	0.726655	0.0458404	0.313084	0.0630841	0.201493	0.294505	2.65839	0.0480427	589
ITSN1	0.222411	0.646859	0.13073	0.343832	0.2021	0.587786	0.286026	1.83173	0.150391	589
KIAA1210	0.202037	0.750424	0.0475382	0.269231	0.0633484	0.235294	0.253191	3.0068	0.0499109	589
MYOM1	0.258065	0.670628	0.0713073	0.38481	0.106329	0.276316	0.347826	2.03608	0.0767824	589
PTPRK_ENST00000368213	0.208829	0.701188	0.089983	0.297821	0.128329	0.430894	0.263948	2.34659	0.0988806	589
ADCY5	0.321429	0.619048	0.0595238	0.519231	0.0961538	0.185185	0.473684	1.625	0.0632911	588
SLITRK2	0.236395	0.670068	0.0935374	0.352792	0.139594	0.395683	0.309577	2.03093	0.103189	588
SPG11	0.246599	0.653061	0.10034	0.377604	0.153646	0.406897	0.327314	1.88235	0.111531	588
ALPK2	0.195911	0.730835	0.0732538	0.268065	0.100233	0.373913	0.243644	2.71519	0.0790441	587
BCL2	0.287905	0.70017	0.011925	0.411192	0.0170316	0.0414201	0.404306	2.33523	0.012069	587
FGFR1	0.149915	0.804089	0.0459966	0.186441	0.0572034	0.306818	0.176353	4.10435	0.0482143	587
KCNU1_ENST00000399881	0.248722	0.681431	0.0698467	0.365	0.1025	0.280822	0.331066	2.13904	0.0750916	587
NLRP12_ENST00000345770	0.316865	0.637138	0.0459966	0.497326	0.0721925	0.145161	0.46384	1.75587	0.0482143	587
PCDHGA5	0.345826	0.630324	0.0238501	0.548649	0.0378378	0.0689655	0.528646	1.70507	0.0244328	587
RASGRF1	0.296422	0.664395	0.0391823	0.446154	0.0589744	0.132184	0.421308	1.9797	0.0407801	587
WNK2_ENST00000427277	0.272572	0.659284	0.0681431	0.413437	0.103359	0.25	0.374707	1.935	0.0731261	587
DLEC1	0.302048	0.624573	0.0733788	0.483607	0.117486	0.242938	0.432763	1.66364	0.0791897	586
KSR2_ENST00000339824	0.313993	0.636519	0.0494881	0.493298	0.077748	0.157609	0.457711	1.75117	0.0520646	586
LPHN2_ENST00000370721	0.204778	0.742321	0.052901	0.275862	0.0712644	0.258333	0.257511	2.88079	0.0558559	586
PRDM1	0.175768	0.697952	0.12628	0.251834	0.180929	0.718447	0.213251	2.31073	0.144531	586
RALGAPA2_ENST00000202677	0.267918	0.639932	0.0921502	0.418667	0.144	0.343949	0.365967	1.77725	0.101504	586
C10orf18	0.188034	0.735043	0.0769231	0.255814	0.104651	0.409091	0.231579	2.77419	0.0833333	585
IRS2	0.169231	0.796581	0.034188	0.212446	0.0429185	0.20202	0.203704	3.91597	0.0353982	585
KIAA0556	0.266667	0.661538	0.0717949	0.403101	0.108527	0.269231	0.363636	1.95455	0.0773481	585
PTPRU	0.230769	0.731624	0.0376068	0.315421	0.0514019	0.162963	0.3	2.72611	0.0390764	585
SHANK2_ENST00000423696	0.290598	0.668376	0.0410256	0.434783	0.0613811	0.141176	0.409639	2.01546	0.0427807	585
ATP8B4	0.234589	0.679795	0.0856164	0.345088	0.125945	0.364964	0.306488	2.12299	0.093633	584
CNTN1	0.22089	0.69863	0.0804795	0.316176	0.115196	0.364341	0.283516	2.31818	0.0875233	584
MPDZ_ENST00000319217	0.238014	0.681507	0.0804795	0.349246	0.11809	0.338129	0.31236	2.13978	0.0875233	584
PDZRN4	0.219178	0.714041	0.0667808	0.306954	0.0935252	0.304688	0.280702	2.49701	0.0715596	584
PLB1	0.270548	0.674658	0.0547945	0.401015	0.0812183	0.202532	0.370892	2.07368	0.057971	584
PRKCB_ENST00000303531	0.231164	0.736301	0.0325342	0.313953	0.044186	0.140741	0.300668	2.79221	0.0336283	584
SMARCA2_ENST00000349721	0.222603	0.729452	0.0479452	0.305164	0.0657277	0.215385	0.286344	2.6962	0.0503597	584
CASC5	0.178388	0.715266	0.106346	0.2494	0.148681	0.596154	0.217119	2.51205	0.119002	583
CASP8_ENST00000358485	0.0548885	0.634648	0.310463	0.0864865	0.489189	5.65625	0.0580762	1.73709	0.450249	583
GON4L_ENST00000437809	0.233276	0.655232	0.111492	0.356021	0.170157	0.477941	0.304251	1.9005	0.125483	583
KIF21A	0.178388	0.667238	0.154374	0.267352	0.231362	0.865385	0.217119	2.00515	0.182556	583
NBEAL1_ENST00000449802	0.176672	0.684391	0.138937	0.258145	0.203008	0.786408	0.214583	2.16848	0.161355	583
PCDHAC1	0.284734	0.675815	0.0394511	0.42132	0.0583756	0.138554	0.398082	2.08466	0.0410714	583
ALPK3_ENST00000258888	0.271478	0.661512	0.0670103	0.41039	0.101299	0.246835	0.372642	1.95431	0.0718232	582
CEP290	0.132302	0.652921	0.214777	0.202632	0.328947	1.62338	0.152475	1.88119	0.273523	582
COBL_ENST00000395542	0.262887	0.627148	0.109966	0.419178	0.175342	0.418301	0.356643	1.68203	0.123552	582
DGKI_ENST00000288490	0.235395	0.683849	0.080756	0.344221	0.11809	0.343066	0.307865	2.16304	0.0878505	582
KIAA1529	0.293814	0.621993	0.0841924	0.472376	0.135359	0.28655	0.416058	1.64545	0.0919325	582
MAP2K3	0.271478	0.671821	0.056701	0.404092	0.084399	0.208861	0.372642	2.04712	0.0601093	582
MYH10	0.201031	0.750859	0.04811	0.267735	0.0640732	0.239316	0.251613	3.01379	0.0505415	582
MYOF_ENST00000371501	0.204467	0.707904	0.0876289	0.288835	0.123786	0.428571	0.257019	2.42353	0.0960452	582
WT1_ENST00000379079	0.139175	0.434708	0.426117	0.320158	0.980237	3.06173	0.161677	0.768997	0.742515	582
NTRK3_ENST00000317501	0.203098	0.755594	0.0413081	0.268793	0.0546697	0.20339	0.25486	3.09155	0.043088	581
UMODL1_ENST00000408989	0.280551	0.674699	0.0447504	0.415816	0.0663265	0.159509	0.389952	2.07407	0.0468468	581
CCNB3	0.212069	0.746552	0.0413793	0.284065	0.0554273	0.195122	0.269147	2.94558	0.0431655	580
GRM7_ENST00000357716	0.313793	0.593103	0.0931034	0.52907	0.156977	0.296703	0.457286	1.45763	0.102662	580
KCNH1	0.251724	0.689655	0.0586207	0.365	0.085	0.232877	0.336406	2.22222	0.0622711	580
MYO18A	0.256897	0.689655	0.0534483	0.3725	0.0775	0.208054	0.345708	2.22222	0.0564663	580
PDE1C_ENST00000396191	0.236207	0.701724	0.062069	0.336609	0.0884521	0.262774	0.309255	2.3526	0.0661765	580
DLEC1_ENST00000346219	0.291883	0.637306	0.0708117	0.457995	0.111111	0.242604	0.412195	1.75714	0.0762082	579
KIAA0556_ENST00000261588	0.264249	0.663212	0.0725389	0.398437	0.109375	0.27451	0.359155	1.96923	0.0782123	579
PCDHGA3	0.33506	0.614853	0.0500864	0.544944	0.0814607	0.149485	0.503896	1.59641	0.0527273	579
PTPRU_ENST00000356870	0.222798	0.737478	0.0397237	0.302108	0.0538642	0.178295	0.286667	2.80921	0.0413669	579
ANKS1B	0.226644	0.712803	0.0605536	0.317961	0.0849515	0.267176	0.293065	2.48193	0.0644567	578
C2CD3_ENST00000334126	0.223183	0.695502	0.0813149	0.320896	0.116915	0.364341	0.287305	2.28409	0.0885122	578
CACNA2D3	0.297578	0.624567	0.0778547	0.476454	0.124654	0.261628	0.423645	1.66359	0.0844278	578
CDHR2	0.273356	0.678201	0.0484429	0.403061	0.0714286	0.177215	0.37619	2.10753	0.0509091	578
EML5	0.16609	0.742215	0.0916955	0.223776	0.123543	0.552083	0.19917	2.87919	0.100952	578
EPHA8	0.342561	0.614187	0.0432526	0.557746	0.0704225	0.126263	0.521053	1.59193	0.045208	578
KCNMA1_ENST00000406533	0.243945	0.653979	0.102076	0.373016	0.156085	0.41844	0.322654	1.89	0.11368	578
PIK3C2B	0.254325	0.66436	0.0813149	0.382813	0.122396	0.319728	0.341067	1.97938	0.0885122	578
PCDHGB3	0.292894	0.679376	0.0277296	0.431122	0.0408163	0.0946746	0.414216	2.11892	0.0285205	577
PCDHGB3_ENST00000576222	0.292894	0.679376	0.0277296	0.431122	0.0408163	0.0946746	0.414216	2.11892	0.0285205	577
SMARCA2	0.225303	0.727903	0.0467938	0.309524	0.0642857	0.207692	0.290828	2.67516	0.0490909	577
ARFGEF2	0.220486	0.725694	0.0538194	0.303828	0.0741627	0.244094	0.282851	2.64557	0.0568807	576
AXL_ENST00000301178	0.138889	0.744792	0.116319	0.18648	0.156177	0.8375	0.16129	2.91837	0.131631	576
NELL1	0.225694	0.706597	0.0677083	0.31941	0.0958231	0.3	0.29148	2.40828	0.0726257	576
OTOF_ENST00000361394	0.260417	0.685764	0.0538194	0.379747	0.078481	0.206667	0.352113	2.18232	0.0568807	576
CEP192	0.193043	0.746087	0.0608696	0.258741	0.0815851	0.315315	0.239224	2.93836	0.0648148	575
GRM7_ENST00000403881	0.313043	0.593043	0.093913	0.527859	0.158358	0.3	0.455696	1.45726	0.103647	575
MMRN1	0.156522	0.766957	0.0765217	0.204082	0.0997732	0.488889	0.185567	3.29104	0.0828625	575
MYOF_ENST00000371502	0.205217	0.709565	0.0852174	0.289216	0.120098	0.415254	0.258206	2.44311	0.0931559	575
RASA1	0.0765217	0.629565	0.293913	0.121547	0.466851	3.84091	0.0828625	1.69953	0.416256	575
TRPA1_ENST00000262209	0.186087	0.728696	0.0852174	0.25537	0.116945	0.457944	0.228632	2.6859	0.0931559	575
CACNA2D1	0.184669	0.743902	0.0714286	0.248244	0.0960187	0.386792	0.226496	2.90476	0.0769231	574
CSF1R_ENST00000286301	0.236934	0.69338	0.0696864	0.341709	0.100503	0.294118	0.310502	2.26136	0.0749064	574
NLGN4X	0.285714	0.679443	0.0348432	0.420513	0.0512821	0.121951	0.4	2.11957	0.0361011	574
NLRP1	0.235192	0.700348	0.0644599	0.335821	0.0920398	0.274074	0.307517	2.33721	0.0689013	574
PRB2_ENST00000389362	0.160279	0.785714	0.054007	0.203991	0.0687361	0.336957	0.190871	3.66667	0.0570902	574
PTCHD3	0.280488	0.592334	0.127178	0.473529	0.214706	0.453416	0.389831	1.45299	0.145709	574
TANC2_ENST00000389520	0.191638	0.743902	0.0644599	0.257611	0.0866511	0.336364	0.237069	2.90476	0.0689013	574
BCL9L_ENST00000334801	0.21815	0.542757	0.239092	0.401929	0.440514	1.096	0.279018	1.18702	0.31422	573
BCL9L_ENST00000392849	0.204188	0.549738	0.246073	0.371429	0.447619	1.20513	0.256579	1.22093	0.326389	573
BLM	0.146597	0.712042	0.141361	0.205882	0.198529	0.964286	0.171779	2.47273	0.164634	573
LMTK2_ENST00000297293	0.270506	0.649215	0.0802792	0.416667	0.123656	0.296774	0.370813	1.85075	0.0872865	573
NINL	0.232112	0.722513	0.0453752	0.321256	0.0628019	0.195489	0.302273	2.60377	0.047532	573
RGS12	0.225131	0.635253	0.139616	0.354396	0.21978	0.620155	0.290541	1.74163	0.162272	573
CEP250	0.188811	0.723776	0.0874126	0.26087	0.120773	0.462963	0.232759	2.62025	0.0957854	572
DSEL	0.194056	0.701049	0.104895	0.276808	0.149626	0.540541	0.240781	2.34503	0.117187	572
FGA	0.174825	0.743007	0.0821678	0.235294	0.110588	0.47	0.211864	2.89116	0.0895238	572
GATA1	0.0891608	0.456294	0.454545	0.195402	0.996169	5.09804	0.0978887	0.839228	0.833333	572
KDM3B	0.23951	0.657343	0.103147	0.364362	0.156915	0.430657	0.314943	1.91837	0.11501	572
MAST4_ENST00000405643	0.263986	0.666084	0.0699301	0.396325	0.104987	0.264901	0.35867	1.99476	0.075188	572
PCDH11X_ENST00000298274	0.216783	0.722028	0.0611888	0.300242	0.0847458	0.282258	0.276786	2.59748	0.0651769	572
PCSK5_ENST00000376767	0.185315	0.622378	0.192308	0.297753	0.308989	1.03774	0.227468	1.64815	0.238095	572
WNK3	0.160839	0.744755	0.0944056	0.215962	0.126761	0.586957	0.191667	2.91781	0.104247	572
ZNF646	0.23951	0.694056	0.0664336	0.345088	0.0957179	0.277372	0.314943	2.26857	0.071161	572
CILP2	0.283713	0.632224	0.084063	0.448753	0.132964	0.296296	0.396088	1.71905	0.0917782	571
EIF4G1	0.210158	0.686515	0.103327	0.306122	0.15051	0.491667	0.266075	2.18994	0.115234	571
GRLF1	0.168126	0.623468	0.208406	0.269663	0.33427	1.23958	0.202105	1.65581	0.263274	571
KIF20B	0.175131	0.686515	0.138354	0.255102	0.201531	0.79	0.212314	2.18994	0.160569	571
NRG3	0.224168	0.712785	0.0630473	0.314496	0.0884521	0.28125	0.288939	2.48171	0.0672897	571
ANKHD1-EIF4EBP3	0.189474	0.736842	0.0736842	0.257143	0.1	0.388889	0.233766	2.8	0.0795455	570
C2orf71	0.245614	0.7	0.054386	0.350877	0.0776942	0.221429	0.325581	2.33333	0.0575139	570
DCAF4L2	0.24386	0.717544	0.0385965	0.339853	0.0537897	0.158273	0.322506	2.54037	0.040146	570
DDR2	0.177193	0.752632	0.0701754	0.235431	0.0932401	0.39604	0.215352	3.04255	0.0754717	570
DMXL1_ENST00000539542	0.205263	0.680702	0.114035	0.301546	0.167526	0.555556	0.258278	2.13187	0.128713	570
DOCK6	0.287719	0.661404	0.0508772	0.435013	0.0769231	0.176829	0.403941	1.95337	0.0536044	570
MAP3K4	0.177193	0.72807	0.0947368	0.243373	0.13012	0.534653	0.215352	2.67742	0.104651	570
NIN_ENST00000453196	0.217544	0.678947	0.103509	0.320413	0.152455	0.475806	0.278027	2.11475	0.11546	570
PLXNB3_ENST00000538966	0.250877	0.673684	0.0754386	0.372396	0.111979	0.300699	0.334895	2.06452	0.0815939	570
SEMA5B_ENST00000451055	0.335088	0.601754	0.0631579	0.556851	0.104956	0.188482	0.503958	1.51101	0.0674157	570
TCF20	0.17193	0.684211	0.14386	0.251282	0.210256	0.836735	0.207627	2.16667	0.168033	570
ADCY9	0.330404	0.625659	0.0439367	0.52809	0.0702247	0.132979	0.493438	1.67136	0.0459559	569
DOCK5	0.210896	0.704745	0.0843585	0.299252	0.119701	0.4	0.267261	2.3869	0.0921305	569
HCN4	0.256591	0.678383	0.0650264	0.378238	0.0958549	0.253425	0.345154	2.10929	0.0695489	569
LAMB2	0.254833	0.678383	0.0667838	0.375648	0.0984456	0.262069	0.341981	2.10929	0.0715631	569
PCDH11X_ENST00000395337	0.221441	0.73638	0.0421793	0.300716	0.0572792	0.190476	0.284424	2.79333	0.0440367	569
PLXNC1	0.251318	0.652021	0.0966608	0.385445	0.148248	0.384615	0.335681	1.87374	0.107004	569
UNC5C	0.251318	0.711775	0.0369069	0.353086	0.0518519	0.146853	0.335681	2.46951	0.0383212	569
ZNF638	0.173989	0.724077	0.101933	0.240291	0.140777	0.585859	0.210638	2.6242	0.113503	569
DCLK1	0.257042	0.684859	0.0580986	0.375321	0.0848329	0.226027	0.345972	2.17318	0.0616822	568
PI4KA	0.260563	0.661972	0.0774648	0.393617	0.117021	0.297297	0.352381	1.95833	0.0839695	568
ZC3H13_ENST00000242848	0.121479	0.649648	0.228873	0.186992	0.352304	1.88406	0.138277	1.85427	0.296804	568
C9orf174	0.275132	0.641975	0.0828924	0.428571	0.129121	0.301282	0.379562	1.7931	0.0903846	567
MMP16	0.208113	0.707231	0.0846561	0.294264	0.119701	0.40678	0.262806	2.41566	0.0924855	567
NCAN_ENST00000539499	0.262787	0.68254	0.0546737	0.385013	0.0801034	0.208054	0.356459	2.15	0.0578358	567
CHD2_ENST00000394196	0.166078	0.662544	0.171378	0.250667	0.258667	1.03191	0.199153	1.96335	0.206823	566
FSIP2	0.166078	0.736749	0.0971731	0.22542	0.131894	0.585106	0.199153	2.79866	0.107632	566
LMTK2	0.273852	0.64311	0.0830389	0.425824	0.129121	0.303226	0.377129	1.80198	0.0905588	566
MYO3B	0.273852	0.664311	0.0618375	0.412234	0.0930851	0.225806	0.377129	1.97895	0.0659134	566
OTOF_ENST00000402415	0.263251	0.685512	0.0512367	0.384021	0.0747423	0.194631	0.357314	2.17978	0.0540037	566
ADAMTS10	0.260177	0.693805	0.0460177	0.375	0.0663265	0.176871	0.351675	2.2659	0.0482375	565
ARHGAP31	0.263717	0.672566	0.0637168	0.392105	0.0947368	0.241611	0.358173	2.05405	0.0680529	565
BCL2_ENST00000398117	0.299115	0.688496	0.0123894	0.434447	0.0179949	0.0414201	0.426768	2.21023	0.0125448	565
PGR	0.19823	0.707965	0.0938053	0.28	0.1325	0.473214	0.247241	2.42424	0.103516	565
FAM47B	0.235816	0.719858	0.0443262	0.327586	0.0615764	0.18797	0.308585	2.56962	0.0463822	564
SEMA5B	0.320922	0.617021	0.0620567	0.520115	0.100575	0.19337	0.472585	1.61111	0.0661626	564
ST6GAL2	0.25	0.705674	0.0443262	0.354271	0.0628141	0.177305	0.333333	2.39759	0.0463822	564
TCF7L2_ENST00000355717	0.143617	0.505319	0.351064	0.284211	0.694737	2.44444	0.167702	1.02151	0.540984	564
ABL1_ENST00000372348	0.234458	0.657194	0.108348	0.356757	0.164865	0.462121	0.306265	1.9171	0.121514	563
CDK5RAP2	0.197158	0.712256	0.0905861	0.276808	0.127182	0.459459	0.245575	2.47531	0.0996094	563
ENSG00000254809	0.316163	0.65897	0.0248668	0.479784	0.0377358	0.0786517	0.462338	1.93229	0.0255009	563
FSIP2_ENST00000343098	0.166963	0.737123	0.0959147	0.226506	0.13012	0.574468	0.200426	2.80405	0.10609	563
NCAN	0.257549	0.689165	0.053286	0.373711	0.0773196	0.206897	0.34689	2.21714	0.0562852	563
SLC8A3	0.325044	0.628774	0.0461812	0.516949	0.0734463	0.142077	0.481579	1.69378	0.0484171	563
BNC2	0.233096	0.713523	0.0533808	0.326683	0.074813	0.229008	0.303944	2.49068	0.056391	562
COL3A1_ENST00000317840	0.179715	0.736655	0.0836299	0.243961	0.113527	0.465347	0.219089	2.7973	0.0912621	562
DEPDC5	0.225979	0.681495	0.0925267	0.331593	0.13577	0.409449	0.291954	2.13966	0.101961	562
PCDH7	0.293594	0.640569	0.0658363	0.458333	0.102778	0.224242	0.415617	1.78218	0.0704762	562
PRKCB_ENST00000321728	0.240214	0.729537	0.0302491	0.329268	0.0414634	0.125926	0.316159	2.69737	0.0311927	562
TRPC7	0.316726	0.658363	0.024911	0.481081	0.0378378	0.0786517	0.463542	1.92708	0.0255474	562
ABL1_ENST00000318560	0.233512	0.655971	0.110517	0.355978	0.168478	0.473282	0.304651	1.90674	0.124248	561
ANKHD1	0.188948	0.737968	0.0730838	0.256039	0.0990338	0.386792	0.232967	2.81633	0.0788462	561
ATP10D	0.213904	0.727273	0.0588235	0.294118	0.0808824	0.275	0.272109	2.66667	0.0625	561
NUP214	0.229947	0.680927	0.0891266	0.337696	0.13089	0.387597	0.298611	2.13408	0.0978474	561
TAF1_ENST00000276072	0.11943	0.816399	0.0641711	0.146288	0.0786026	0.537313	0.135628	4.4466	0.0685714	561
DOCK7	0.198214	0.701786	0.1	0.282443	0.142494	0.504505	0.247216	2.35329	0.111111	560
FGFR2_ENST00000357555	0.144643	0.801786	0.0535714	0.180401	0.0668151	0.37037	0.169102	4.04505	0.0566038	560
MLL5	0.196429	0.664286	0.139286	0.295699	0.209677	0.709091	0.244444	1.97872	0.161826	560
MYPN	0.235714	0.689286	0.075	0.341969	0.108808	0.318182	0.308411	2.21839	0.0810811	560
PRKCB	0.239286	0.732143	0.0285714	0.326829	0.0390244	0.119403	0.314554	2.73333	0.0294118	560
RERE	0.2375	0.655357	0.107143	0.362398	0.163488	0.451128	0.311475	1.90155	0.12	560
TNKS1BP1	0.258929	0.667857	0.0732143	0.387701	0.109626	0.282759	0.349398	2.01075	0.0789981	560
YSK4_ENST00000375845	0.225	0.703571	0.0714286	0.319797	0.101523	0.31746	0.290323	2.37349	0.0769231	560
ZNF845	0.257143	0.707143	0.0357143	0.363636	0.0505051	0.138889	0.346154	2.41463	0.037037	560
ABCB4	0.221825	0.627907	0.150268	0.353276	0.239316	0.677419	0.285057	1.6875	0.176842	559
GRIK2_ENST00000369138	0.216458	0.676208	0.107335	0.320106	0.15873	0.495868	0.276256	2.0884	0.12024	559
KCNMA1	0.250447	0.652952	0.0966011	0.383562	0.147945	0.385714	0.334129	1.88144	0.106931	559
NLRP11	0.270125	0.669052	0.0608229	0.403743	0.0909091	0.225166	0.370098	2.02162	0.0647619	559
OCA2	0.271914	0.660107	0.0679785	0.411924	0.102981	0.25	0.373464	1.94211	0.0729367	559
PCDHGA8	0.313059	0.65653	0.0304114	0.476839	0.0463215	0.0971429	0.455729	1.91146	0.0313653	559
RBMX	0.100179	0.744186	0.155635	0.134615	0.209135	1.55357	0.111332	2.90909	0.184322	559
ABCC3	0.274194	0.68638	0.0394265	0.399478	0.0574413	0.143791	0.377778	2.18857	0.0410448	558
ATP1A2	0.275986	0.697133	0.0268817	0.395887	0.0385604	0.0974026	0.381188	2.30178	0.0276243	558
BAI2	0.256272	0.688172	0.0555556	0.372396	0.0807292	0.216783	0.344578	2.2069	0.0588235	558
BCL11A	0.34767	0.605735	0.046595	0.573964	0.0769231	0.134021	0.532967	1.53636	0.0488722	558
GRIK3_ENST00000373093	0.275986	0.682796	0.0412186	0.404199	0.0603675	0.149351	0.381188	2.15254	0.0429907	558
MAP3K4_ENST00000392142	0.170251	0.732975	0.0967742	0.232274	0.132029	0.568421	0.205184	2.74497	0.107143	558
MYO5C	0.24552	0.663082	0.0913978	0.37027	0.137838	0.372263	0.325416	1.96809	0.100592	558
NFASC_ENST00000367172	0.232975	0.670251	0.0967742	0.347594	0.144385	0.415385	0.303738	2.03261	0.107143	558
PHF2	0.318996	0.566308	0.114695	0.563291	0.202532	0.359551	0.468421	1.30579	0.129555	558
SHROOM2	0.256272	0.679211	0.0645161	0.377309	0.0949868	0.251748	0.344578	2.11732	0.0689655	558
ANKRD12	0.147217	0.689408	0.163375	0.213542	0.236979	1.10976	0.172632	2.21965	0.195279	557
KIAA0100_ENST00000528896	0.244165	0.685817	0.070018	0.356021	0.102094	0.286765	0.32304	2.18286	0.0752896	557
KLHL1	0.201077	0.709156	0.0897666	0.283544	0.126582	0.446429	0.251685	2.43827	0.0986193	557
PNPLA7	0.2693	0.651706	0.0789946	0.413223	0.121212	0.293333	0.36855	1.87113	0.08577	557
ARSD	0.113309	0.811151	0.0755396	0.13969	0.0931264	0.666667	0.127789	4.29524	0.0817121	556
NLRP9	0.253597	0.663669	0.0827338	0.382114	0.124661	0.326241	0.339759	1.97326	0.0901961	556
PIEZO1	0.257194	0.714029	0.028777	0.360202	0.0403023	0.111888	0.346247	2.49686	0.0296296	556
ADAMTS14	0.234234	0.704505	0.0612613	0.332481	0.0869565	0.261538	0.305882	2.38415	0.0652591	555
C6orf174	0.284685	0.654054	0.0612613	0.435262	0.0936639	0.21519	0.397985	1.89063	0.0652591	555
CR2	0.16036	0.733333	0.106306	0.218673	0.144963	0.662921	0.190987	2.75	0.118952	555
DCLK1_ENST00000255448	0.261261	0.679279	0.0594595	0.384615	0.0875332	0.227586	0.353659	2.11798	0.0632184	555
LIFR_ENST00000263409	0.158559	0.74955	0.0918919	0.211538	0.122596	0.579545	0.188437	2.99281	0.10119	555
LTBP1_ENST00000407925	0.273874	0.672072	0.0540541	0.407507	0.080429	0.197368	0.377171	2.04945	0.0571429	555
MAST4_ENST00000403666	0.264865	0.663063	0.0720721	0.399457	0.108696	0.272109	0.360294	1.96791	0.0776699	555
RGS22	0.174775	0.686486	0.138739	0.254593	0.2021	0.793814	0.21179	2.18966	0.161088	555
SFMBT2	0.275676	0.672072	0.0522523	0.410188	0.077748	0.189542	0.380597	2.04945	0.0551331	555
AQP7_ENST00000379503	0.169675	0.814079	0.0162455	0.208426	0.0199557	0.0957447	0.204348	4.37864	0.0165138	554
MLLT4	0.223827	0.620939	0.155235	0.360465	0.25	0.693548	0.288372	1.6381	0.183761	554
MN1	0.276173	0.638989	0.0848375	0.432203	0.132768	0.30719	0.381546	1.77	0.0927022	554
PLCB4_ENST00000378473	0.207581	0.716606	0.0758123	0.289673	0.105793	0.365217	0.261959	2.52866	0.0820312	554
SLC8A1_ENST00000406785	0.263538	0.687726	0.0487365	0.383202	0.0708661	0.184932	0.357843	2.20231	0.0512334	554
ATP2B3_ENST00000349466	0.321881	0.638336	0.039783	0.504249	0.0623229	0.123596	0.474667	1.765	0.0414313	553
C18orf34_ENST00000383096	0.128391	0.672694	0.198915	0.19086	0.295699	1.5493	0.147303	2.05525	0.248307	553
NLRP14_ENST00000299481	0.231465	0.690778	0.0777577	0.335079	0.112565	0.335938	0.301176	2.23392	0.0843137	553
OR9G1	0.179024	0.801085	0.0198915	0.223476	0.0248307	0.111111	0.218062	4.02727	0.0202952	553
ZEB1	0.186257	0.699819	0.113924	0.26615	0.162791	0.61165	0.228889	2.33133	0.128571	553
FRMPD2	0.226449	0.717391	0.0561594	0.315657	0.0782828	0.248	0.29274	2.53846	0.059501	552
LY75	0.184783	0.722826	0.0923913	0.255639	0.12782	0.5	0.226667	2.60784	0.101796	552
PHRF1_ENST00000264555	0.253623	0.673913	0.0724638	0.376344	0.107527	0.285714	0.339806	2.06667	0.078125	552
TTBK1	0.235507	0.697464	0.067029	0.337662	0.0961039	0.284615	0.308057	2.30539	0.0718447	552
DAPK1	0.283122	0.649728	0.0671506	0.435754	0.103352	0.237179	0.394937	1.85492	0.0719844	551
HLA-DQB1	0.206897	0.77677	0.0163339	0.266355	0.021028	0.0789474	0.26087	3.47967	0.0166052	551
NFASC_ENST00000367171	0.23049	0.675136	0.0943739	0.341398	0.139785	0.409449	0.299528	2.07821	0.104208	551
SLC8A1_ENST00000542024	0.264973	0.686025	0.0490018	0.386243	0.0714286	0.184932	0.360494	2.18497	0.0515267	551
C2CD3	0.22	0.705455	0.0745455	0.311856	0.10567	0.338843	0.282051	2.39506	0.0805501	550
CHD2	0.161818	0.658182	0.18	0.245856	0.273481	1.11236	0.193059	1.92553	0.219512	550
CNGB3	0.178182	0.741818	0.08	0.240196	0.107843	0.44898	0.216814	2.87324	0.0869565	550
DDR2_ENST00000367922	0.196364	0.738182	0.0654545	0.26601	0.08867	0.333333	0.244344	2.81944	0.0700389	550
MYO5A	0.183636	0.732727	0.0836364	0.25062	0.114144	0.455446	0.224944	2.7415	0.0912698	550
TNIK	0.221818	0.674545	0.103636	0.328841	0.153639	0.467213	0.285047	2.07263	0.115619	550
ENSG00000196306	0.103825	0.752277	0.143898	0.138015	0.191283	1.38596	0.115854	3.03676	0.168085	549
HFM1	0.174863	0.721311	0.103825	0.242424	0.143939	0.59375	0.211921	2.58824	0.115854	549
KIAA1404	0.255009	0.668488	0.0765027	0.381471	0.114441	0.3	0.342298	2.01648	0.0828402	549
MAST4_ENST00000261569	0.264117	0.664845	0.0710383	0.39726	0.106849	0.268966	0.358911	1.9837	0.0764706	549
MDGA2_ENST00000439988	0.154827	0.737705	0.107468	0.209877	0.145679	0.694118	0.18319	2.8125	0.120408	549
NBEAL2	0.269581	0.695811	0.0346084	0.387435	0.0497382	0.128378	0.369077	2.28743	0.0358491	549
ROR2	0.275046	0.681239	0.0437158	0.403743	0.0641711	0.15894	0.379397	2.13714	0.0457143	549
ZNFX1	0.255009	0.668488	0.0765027	0.381471	0.114441	0.3	0.342298	2.01648	0.0828402	549
OR2T33	0.19708	0.773723	0.0291971	0.254717	0.0377358	0.148148	0.245455	3.41935	0.0300752	548
PCDH11X_ENST00000504220	0.220803	0.733577	0.0456204	0.300995	0.0621891	0.206612	0.283372	2.75342	0.0478011	548
ANO2	0.26691	0.676417	0.0566728	0.394595	0.0837838	0.212329	0.36409	2.0904	0.0600775	547
ERCC6	0.248629	0.661792	0.0895795	0.375691	0.135359	0.360294	0.3309	1.95676	0.0983936	547
ITGAD	0.25777	0.702011	0.0402194	0.367188	0.0572917	0.156028	0.347291	2.35583	0.0419048	547
NFATC1	0.277879	0.691042	0.0310786	0.402116	0.0449735	0.111842	0.38481	2.23669	0.0320755	547
OTOP1	0.241316	0.722121	0.0365631	0.334177	0.0506329	0.151515	0.318072	2.59868	0.0379507	547
PTPRU_ENST00000460170	0.223035	0.736746	0.0402194	0.30273	0.0545906	0.180328	0.287059	2.79861	0.0419048	547
RECQL4	0.16819	0.784278	0.047532	0.214452	0.0606061	0.282609	0.202198	3.63559	0.049904	547
SALL4	0.246801	0.689214	0.0639854	0.35809	0.0928382	0.259259	0.32767	2.21765	0.0683594	547
B2M	0.0238095	0.357143	0.619048	0.0666667	1.73333	26	0.0243902	0.555556	1.625	546
LRP6	0.272894	0.664835	0.0622711	0.410468	0.0936639	0.228188	0.375315	1.98361	0.0664062	546
MCM3AP	0.232601	0.661172	0.106227	0.351801	0.160665	0.456693	0.303103	1.95135	0.118852	546
MST1R	0.192308	0.727106	0.0805861	0.264484	0.110831	0.419048	0.238095	2.66443	0.0876494	546
TNS3	0.267399	0.67033	0.0622711	0.398907	0.0928962	0.232877	0.365	2.03333	0.0664062	546
C13orf40	0.198165	0.706422	0.0954128	0.280519	0.135065	0.481481	0.24714	2.40625	0.105477	545
DCAF12L2	0.255046	0.704587	0.040367	0.361979	0.0572917	0.158273	0.342365	2.38509	0.042065	545
LIFR	0.157798	0.750459	0.0917431	0.210269	0.122249	0.581395	0.187364	3.00735	0.10101	545
MST1R_ENST00000296474	0.192661	0.730275	0.0770642	0.263819	0.105528	0.4	0.238636	2.70748	0.083499	545
BRWD1	0.159926	0.737132	0.102941	0.216958	0.139651	0.643678	0.190372	2.8042	0.114754	544
FLT4_ENST00000376868	0.240809	0.676471	0.0827206	0.355978	0.122283	0.343511	0.317191	2.09091	0.0901804	544
FRG2B	0.136029	0.799632	0.0643382	0.170115	0.0804598	0.472973	0.157447	3.99083	0.0687623	544
LRFN2	0.277574	0.667279	0.0551471	0.415978	0.0826446	0.198675	0.384224	2.00552	0.0583658	544
MLLT4_ENST00000392108	0.220588	0.623162	0.15625	0.353982	0.250737	0.708333	0.283019	1.65366	0.185185	544
PALB2	0.172794	0.698529	0.128676	0.247368	0.184211	0.744681	0.208889	2.31707	0.147679	544
PDE1C_ENST00000396193	0.237132	0.696691	0.0661765	0.340369	0.0949868	0.27907	0.310843	2.29697	0.0708661	544
PPP1R9A	0.194853	0.733456	0.0716912	0.265664	0.0977444	0.367925	0.242009	2.75172	0.0772277	544
XIRP2_ENST00000409728	0.229779	0.711397	0.0588235	0.322997	0.0826873	0.256	0.298329	2.46497	0.0625	544
XRCC1	0.365809	0.621324	0.0128676	0.588757	0.0207101	0.0351759	0.576812	1.64078	0.0130354	544
BRIP1	0.116022	0.775322	0.108656	0.149644	0.140143	0.936508	0.13125	3.45082	0.121901	543
CNTRL_ENST00000373855	0.178637	0.67035	0.151013	0.266484	0.225275	0.845361	0.217489	2.03352	0.177874	543
DOPEY1	0.162063	0.73849	0.0994475	0.219451	0.134663	0.613636	0.193407	2.82394	0.110429	543
NCKAP1L	0.246777	0.701657	0.0515654	0.351706	0.0734908	0.208955	0.327628	2.35185	0.0543689	543
PDE1C	0.237569	0.701657	0.0607735	0.338583	0.0866142	0.255814	0.311594	2.35185	0.0647059	543
PLB1_ENST00000422425	0.265193	0.6814	0.053407	0.389189	0.0783784	0.201389	0.360902	2.13873	0.0564202	543
SIM1	0.28361	0.675875	0.0405157	0.419619	0.0599455	0.142857	0.395887	2.08523	0.0422265	543
SIRPA	0.134438	0.843462	0.0220994	0.159389	0.0262009	0.164384	0.155319	5.38824	0.0225989	543
SUPT6H	0.220994	0.709024	0.0699816	0.311688	0.0987013	0.316667	0.283688	2.43671	0.0752475	543
SVEP1_ENST00000302728	0.213628	0.73849	0.0478821	0.289277	0.0648379	0.224138	0.271663	2.82394	0.0502901	543
ZBBX_ENST00000455345	0.169429	0.731123	0.0994475	0.231738	0.13602	0.586957	0.203991	2.71918	0.110429	543
KIAA0415_ENST00000450194	0.276753	0.666052	0.0571956	0.415512	0.0858726	0.206667	0.382653	1.99448	0.0606654	542
KIAA0564	0.210332	0.710332	0.0793358	0.296104	0.111688	0.377193	0.266355	2.45223	0.0861723	542
NAV1	0.249077	0.654982	0.095941	0.380282	0.146479	0.385185	0.331695	1.8984	0.106122	542
TNIK_ENST00000436636	0.219557	0.675277	0.105166	0.325137	0.155738	0.478992	0.281324	2.07955	0.117526	542
TYK2	0.274908	0.690037	0.0350554	0.398396	0.0508021	0.127517	0.379135	2.22619	0.0363289	542
CBLB_ENST00000394027	0.528651	0.42329	0.0480591	1.24891	0.113537	0.0909091	1.12157	0.733974	0.0504854	541
GOLGA4	0.134935	0.715342	0.149723	0.18863	0.209302	1.10959	0.155983	2.51299	0.176087	541
INPP4B	0.182994	0.71719	0.0998152	0.255155	0.139175	0.545455	0.223982	2.53595	0.110883	541
JAKMIP1_ENST00000409021	0.25878	0.680222	0.0609982	0.380435	0.0896739	0.235714	0.349127	2.12717	0.0649606	541
OR2T8	0.123845	0.863216	0.012939	0.143469	0.0149893	0.104478	0.14135	6.31081	0.0131086	541
DUOX2	0.274074	0.672222	0.0537037	0.407713	0.0798898	0.195946	0.377551	2.05085	0.0567515	540
LAMB3	0.266667	0.701852	0.0314815	0.379947	0.0448549	0.118056	0.363636	2.35404	0.0325048	540
MEGF6	0.238889	0.67963	0.0814815	0.351499	0.119891	0.341085	0.313869	2.12139	0.0887097	540
ZNF626_ENST00000392298	0.161111	0.711111	0.127778	0.226562	0.179687	0.793103	0.192053	2.46154	0.146497	540
AOX1	0.233766	0.729128	0.0371058	0.320611	0.0508906	0.15873	0.305085	2.69178	0.0385356	539
ARHGEF11	0.241187	0.703154	0.0556586	0.343008	0.0791557	0.230769	0.317848	2.36875	0.0589391	539
ATP13A4	0.241187	0.706865	0.0519481	0.341207	0.0734908	0.215385	0.317848	2.41139	0.0547945	539
CSF3R_ENST00000373104	0.374768	0.549165	0.0760668	0.682432	0.138514	0.20297	0.599407	1.21811	0.0823293	539
DAPK1_ENST00000408954	0.272727	0.660482	0.0667904	0.412921	0.101124	0.244898	0.375	1.94536	0.0715706	539
MAP3K13	0.150278	0.721707	0.128015	0.208226	0.177378	0.851852	0.176856	2.59333	0.146809	539
VWDE_ENST00000275358	0.142857	0.762523	0.0946197	0.187348	0.124088	0.662338	0.166667	3.21094	0.104508	539
ZFC3H1	0.146568	0.742115	0.111317	0.1975	0.15	0.759494	0.171739	2.8777	0.125261	539
ACE	0.239777	0.698885	0.0613383	0.343085	0.087766	0.255814	0.315403	2.32099	0.0653465	538
CCDC141	0.208178	0.72119	0.070632	0.28866	0.0979381	0.339286	0.262911	2.58667	0.076	538
CIITA_ENST00000324288	0.315985	0.624535	0.0594796	0.505952	0.0952381	0.188235	0.461957	1.66337	0.0632411	538
MYT1	0.288104	0.667286	0.0446097	0.431755	0.0668524	0.154839	0.4047	2.00559	0.0466926	538
PDZRN3_ENST00000263666	0.299257	0.657993	0.0427509	0.454802	0.0649718	0.142857	0.427056	1.92391	0.0446602	538
COL21A1	0.171322	0.746741	0.0819367	0.229426	0.109726	0.478261	0.206742	2.94853	0.0892495	537
COL9A1	0.227188	0.718808	0.0540037	0.316062	0.0751295	0.237705	0.293976	2.55629	0.0570866	537
MYO3B_ENST00000408978	0.283054	0.646182	0.0707635	0.43804	0.10951	0.25	0.394805	1.82632	0.0761523	537
SCAND3	0.188082	0.726257	0.0856611	0.258974	0.117949	0.455446	0.231651	2.65306	0.0936864	537
XPO1	0.106145	0.836127	0.0577281	0.126949	0.0690423	0.54386	0.11875	5.10227	0.0612648	537
COL16A1	0.253731	0.68097	0.0652985	0.372603	0.0958904	0.257353	0.34	2.1345	0.0698603	536
DGKI_ENST00000424189	0.244403	0.673507	0.0820896	0.362881	0.121884	0.335878	0.323457	2.06286	0.0894309	536
IQGAP2	0.203358	0.720149	0.0764925	0.282383	0.106218	0.376147	0.255269	2.57333	0.0828283	536
KIDINS220	0.242537	0.675373	0.0820896	0.359116	0.121547	0.338462	0.320197	2.08046	0.0894309	536
MAST1_ENST00000251472	0.300373	0.641791	0.0578358	0.468023	0.0901163	0.192547	0.429333	1.79167	0.0613861	536
MDGA2	0.156716	0.748134	0.0951493	0.209476	0.127182	0.607143	0.185841	2.97037	0.105155	536
PCDHGB1_ENST00000523390	0.341418	0.63806	0.0205224	0.535088	0.0321637	0.0601093	0.518414	1.76289	0.0209524	536
PRAMEF2	0.23694	0.714552	0.0485075	0.331593	0.0678851	0.204724	0.310513	2.50327	0.0509804	536
STON1-GTF2A1L	0.233209	0.70709	0.0597015	0.329815	0.0844327	0.256	0.304136	2.41401	0.0634921	536
TRERF1	0.220149	0.720149	0.0597015	0.305699	0.0829016	0.271186	0.282297	2.57333	0.0634921	536
ARFGEF1	0.183178	0.665421	0.151402	0.275281	0.227528	0.826531	0.224256	1.98883	0.178414	535
ATP2B3_ENST00000263519	0.319626	0.642991	0.0373832	0.497093	0.0581395	0.116959	0.46978	1.80105	0.038835	535
COL6A2_ENST00000357838	0.28785	0.678505	0.0336449	0.424242	0.0495868	0.116883	0.404199	2.11047	0.0348162	535
IFT140	0.285981	0.674766	0.0392523	0.423823	0.0581717	0.137255	0.400524	2.07471	0.040856	535
ITIH5L	0.24486	0.706542	0.0485981	0.346561	0.0687831	0.198473	0.324257	2.40764	0.0510806	535
KCNQ5	0.229907	0.706542	0.0635514	0.325397	0.0899471	0.276423	0.298544	2.40764	0.0678643	535
KNTC1	0.194393	0.708411	0.0971963	0.274406	0.137203	0.5	0.241299	2.42949	0.10766	535
MAST1	0.302804	0.642991	0.0542056	0.47093	0.0843023	0.179012	0.434316	1.80105	0.0573123	535
MEGF10	0.282243	0.652336	0.0654206	0.432665	0.100287	0.231788	0.393229	1.87634	0.07	535
MRC2	0.257944	0.671028	0.071028	0.384401	0.10585	0.275362	0.347607	2.03977	0.0764588	535
PTPRK_ENST00000368227	0.228037	0.685981	0.0859813	0.332425	0.125341	0.377049	0.2954	2.18452	0.0940695	535
ZNF236_ENST00000543926	0.241121	0.652336	0.106542	0.369628	0.163324	0.44186	0.317734	1.87634	0.119247	535
BCL11B	0.280899	0.646067	0.0730337	0.434783	0.113043	0.26	0.390625	1.8254	0.0787879	534
COL21A1_ENST00000244728	0.164794	0.756554	0.0786517	0.217822	0.10396	0.477273	0.197309	3.10769	0.0853659	534
NUP98	0.159176	0.749064	0.0917603	0.2125	0.1225	0.576471	0.18931	2.98507	0.101031	534
UMODL1	0.294007	0.666667	0.0393258	0.441011	0.0589888	0.133758	0.416446	2	0.0409357	534
ATP4A	0.26454	0.694184	0.0412758	0.381081	0.0594595	0.156028	0.359694	2.26994	0.0430528	533
DDX60_ENST00000393743	0.204503	0.712946	0.0825516	0.286842	0.115789	0.40367	0.257075	2.48366	0.0899796	533
DISP1	0.262664	0.684803	0.0525328	0.383562	0.0767123	0.2	0.356234	2.17262	0.0554455	533
FANCD2	0.251407	0.667917	0.0806754	0.376404	0.120787	0.320896	0.33584	2.0113	0.0877551	533
L1CAM	0.260788	0.688555	0.0506567	0.378747	0.0735695	0.194245	0.352792	2.21084	0.0533597	533
RAD50_ENST00000265335	0.0787992	0.744841	0.17636	0.105793	0.236776	2.2381	0.0855397	2.91912	0.214123	533
ZBBX	0.168856	0.729831	0.101313	0.231362	0.138817	0.6	0.20316	2.70139	0.112735	533
DDX60	0.204887	0.712406	0.0827068	0.287599	0.116095	0.40367	0.257683	2.47712	0.0901639	532
HEATR8	0.296992	0.652256	0.0507519	0.455331	0.0778098	0.170886	0.42246	1.87568	0.0534653	532
PTPRS_ENST00000262963	0.12218	0.793233	0.0845865	0.154028	0.106635	0.692308	0.139186	3.83636	0.0924025	532
CACNA1G_ENST00000416767	0.301318	0.644068	0.0546139	0.467836	0.0847953	0.18125	0.431267	1.80952	0.0577689	531
FLT1_ENST00000541932	0.156309	0.764595	0.079096	0.204433	0.103448	0.506024	0.185268	3.248	0.0858896	531
HEATR8_ENST00000421030	0.297552	0.651601	0.0508475	0.456647	0.0780347	0.170886	0.423592	1.87027	0.0535714	531
MYO1F	0.314501	0.644068	0.0414313	0.488304	0.0643275	0.131737	0.458791	1.80952	0.043222	531
RADIL	0.310734	0.630885	0.0583804	0.492537	0.0925373	0.187879	0.45082	1.70918	0.062	531
SLCO6A1	0.246704	0.691149	0.0621469	0.356948	0.0899183	0.251908	0.3275	2.2378	0.0662651	531
TP63_ENST00000354600	0.193974	0.730697	0.0753296	0.265464	0.103093	0.38835	0.240654	2.71329	0.0814664	531
ZFAT_ENST00000377838	0.26177	0.66855	0.0696798	0.391549	0.104225	0.266187	0.354592	2.01705	0.0748988	531
ZNF479	0.146893	0.794727	0.0583804	0.184834	0.0734597	0.397436	0.172185	3.87156	0.062	531
ADAM7	0.218868	0.716981	0.0641509	0.305263	0.0894737	0.293103	0.280193	2.53333	0.0685484	530
ANKRD26	0.160377	0.707547	0.132075	0.226667	0.186667	0.823529	0.191011	2.41935	0.152174	530
AQP7_ENST00000541274	0.237736	0.749057	0.0132075	0.31738	0.0176322	0.0555556	0.311881	2.98496	0.0133843	530
CNOT1_ENST00000441024	0.186792	0.701887	0.111321	0.266129	0.158602	0.59596	0.229698	2.35443	0.125265	530
EVC2_ENST00000344938	0.249057	0.690566	0.0603774	0.360656	0.0874317	0.242424	0.331658	2.23171	0.064257	530
LAMC1	0.216981	0.733962	0.0490566	0.29563	0.066838	0.226087	0.277108	2.75887	0.0515873	530
MADD	0.228302	0.716981	0.054717	0.318421	0.0763158	0.239669	0.295844	2.53333	0.0578842	530
PLG	0.283019	0.664151	0.0528302	0.426136	0.0795455	0.186667	0.394737	1.97753	0.0557769	530
RAD21	0.145283	0.533962	0.320755	0.272085	0.600707	2.20779	0.169978	1.14575	0.472222	530
SHANK1_ENST00000391813	0.277358	0.666038	0.0566038	0.416431	0.0849858	0.204082	0.383812	1.99435	0.06	530
ARHGAP21	0.202268	0.706994	0.0907372	0.286096	0.128342	0.448598	0.253555	2.4129	0.0997921	529
ATN1	0.241966	0.695652	0.0623819	0.347826	0.0896739	0.257812	0.319202	2.28571	0.0665323	529
C7_ENST00000313164	0.206049	0.722117	0.0718336	0.28534	0.0994764	0.348624	0.259524	2.59864	0.0773931	529
DENND3	0.289225	0.667297	0.0434783	0.433428	0.0651558	0.150327	0.406915	2.00568	0.0454545	529
FCRL5_ENST00000356953	0.245747	0.720227	0.0340265	0.341207	0.0472441	0.138462	0.325815	2.57432	0.035225	529
FILIP1_ENST00000393004	0.241966	0.674858	0.0831758	0.358543	0.123249	0.34375	0.319202	2.07558	0.0907216	529
GBF1	0.234405	0.712665	0.0529301	0.328912	0.0742706	0.225806	0.306173	2.48026	0.0558882	529
KIF16B	0.230624	0.699433	0.0699433	0.32973	0.1	0.303279	0.299754	2.32704	0.0752033	529
NLRP1_ENST00000572272	0.240076	0.699433	0.0604915	0.343243	0.0864865	0.251969	0.31592	2.32704	0.0643863	529
PARD3	0.15879	0.727788	0.113422	0.218182	0.155844	0.714286	0.188764	2.67361	0.127932	529
PCNXL3_ENST00000355703	0.287335	0.637051	0.0756144	0.451039	0.118694	0.263158	0.403183	1.75521	0.0817996	529
SLC4A10	0.173913	0.776938	0.0491493	0.223844	0.0632603	0.282609	0.210526	3.48305	0.0516899	529
STK31	0.172023	0.742911	0.0850662	0.231552	0.114504	0.494505	0.207763	2.88971	0.0929752	529
TMEM132D_ENST00000389441	0.240076	0.716446	0.0434783	0.335092	0.060686	0.181102	0.31592	2.52667	0.0454545	529
CCDC88A	0.153409	0.731061	0.11553	0.209845	0.158031	0.753086	0.181208	2.71831	0.130621	528
CELSR3_ENST00000544264	0.246212	0.683712	0.0700758	0.360111	0.102493	0.284615	0.326633	2.16168	0.0753564	528
COL20A1_ENST00000326996	0.3125	0.632576	0.0549242	0.494012	0.0868263	0.175758	0.454545	1.72165	0.0581162	528
GPR116	0.261364	0.689394	0.0492424	0.379121	0.0714286	0.188406	0.353846	2.21951	0.0517928	528
GXYLT1	0.094697	0.827652	0.0776515	0.114416	0.0938215	0.82	0.104603	4.8022	0.0841889	528
KIF17	0.30303	0.659091	0.0378788	0.45977	0.0574713	0.125	0.434783	1.93333	0.0393701	528
PCDHB13	0.308712	0.657197	0.0340909	0.469741	0.0518732	0.110429	0.446575	1.91713	0.0352941	528
PTPRH	0.232955	0.723485	0.0435606	0.32199	0.0602094	0.186992	0.303704	2.61644	0.0455446	528
TRIP11	0.145833	0.717803	0.136364	0.203166	0.189974	0.935065	0.170732	2.54362	0.157895	528
WDR72	0.221591	0.653409	0.125	0.33913	0.191304	0.564103	0.284672	1.88525	0.142857	528
DAAM2_ENST00000398904	0.669829	0.316888	0.0132827	2.11377	0.0419162	0.01983	2.02874	0.463889	0.0134615	527
DYNC2H1_ENST00000398093	0.172676	0.71537	0.111954	0.241379	0.156499	0.648352	0.208716	2.51333	0.126068	527
GOLGA3_ENST00000456883	0.28463	0.662239	0.0531309	0.429799	0.0802292	0.186667	0.397878	1.96067	0.0561122	527
KCNN3	0.239089	0.736243	0.0246679	0.324742	0.0335052	0.103175	0.314214	2.79137	0.0252918	527
OBSL1	0.297913	0.660342	0.0417457	0.451149	0.0632184	0.140127	0.424324	1.94413	0.0435644	527
PHRF1	0.250474	0.683112	0.0664137	0.366667	0.0972222	0.265152	0.334177	2.15569	0.0711382	527
USP8	0.0986717	0.857685	0.0436433	0.115044	0.050885	0.442308	0.109474	6.02667	0.0456349	527
ATP2B3	0.328897	0.638783	0.0323194	0.514881	0.0505952	0.0982659	0.490085	1.76842	0.0333988	526
BCL11A_ENST00000356842	0.361217	0.595057	0.0437262	0.607029	0.0734824	0.121053	0.565476	1.46948	0.0457256	526
CASP8_ENST00000264275	0.0627376	0.627376	0.309886	0.1	0.493939	4.93939	0.0669371	1.68367	0.449036	526
FGFR4_ENST00000292408	0.190114	0.731939	0.0779468	0.25974	0.106494	0.41	0.234742	2.7305	0.0845361	526
GUCY1A2	0.241445	0.69962	0.0589354	0.345109	0.0842391	0.244094	0.318296	2.32911	0.0626263	526
HEPHL1	0.209125	0.714829	0.0760456	0.292553	0.106383	0.363636	0.264423	2.50667	0.0823045	526
KIAA0430	0.247148	0.676806	0.0760456	0.365169	0.11236	0.307692	0.328283	2.09412	0.0823045	526
KIF21A_ENST00000395670	0.186312	0.659696	0.153992	0.282421	0.233429	0.826531	0.228972	1.93855	0.182022	526
LTBP4_ENST00000308370	0.262357	0.653992	0.0836502	0.401163	0.127907	0.318841	0.35567	1.89011	0.0912863	526
PCDHGA12_ENST00000252085	0.370722	0.612167	0.0171103	0.60559	0.0279503	0.0461538	0.589124	1.57843	0.0174081	526
PCDHGA7	0.277567	0.701521	0.0209125	0.395664	0.0298103	0.0753425	0.384211	2.35032	0.0213592	526
RFX6	0.205323	0.709125	0.0855513	0.289544	0.120643	0.416667	0.258373	2.43791	0.0935551	526
RGS22_ENST00000360863	0.174905	0.690114	0.134981	0.253444	0.195592	0.771739	0.211982	2.22699	0.156044	526
SIGLEC12	0.250951	0.625475	0.123574	0.401216	0.197568	0.492424	0.335025	1.67005	0.140998	526
STK11_ENST00000326873	0.0380228	0.539924	0.422053	0.0704225	0.78169	11.1	0.0395257	1.17355	0.730263	526
SYNPO2_ENST00000307142	0.203422	0.726236	0.0703422	0.280105	0.0968586	0.345794	0.25537	2.65278	0.0756646	526
CDC42BPB	0.299048	0.628571	0.072381	0.475758	0.115152	0.242038	0.42663	1.69231	0.0780287	525
PCDHGA12	0.371429	0.611429	0.0171429	0.607477	0.0280374	0.0461538	0.590909	1.57353	0.0174419	525
[truncated: 27,416 more rows]
