# Supplementary material for: Use of signals of positive and negative selection to distinguish cancer genes and passenger genes
Source: eLife. 2021 Jan 11;10:e59629. doi: 10.7554/eLife.59629 (PMC7877913; doi:10.7554/eLife.59629)
Supplement: Supplementary file 10. [file elife-59629-supp10.xlsx]

## Sheet: Supplementary file 10
Tumor Primary Site	Number of SO	%		Tumor Primary Site	Number of SSI	%		Tumor Primary Site	Number of mutations	%
large_intestine	842127	19.9798		large_intestine	871549	20.4414		large_intestine	895664	20.3286
skin	805475	19.1102		skin	806323	18.9115		skin	825967	18.7467
liver	319617	7.58305		liver	320095	7.50753		liver	342574	7.7753
lung	306262	7.2662		lung	307178	7.20457		lung	319845	7.25943
stomach	232532	5.51692		stomach	236133	5.53828		stomach	241154	5.4734
breast	220956	5.24227		breast	222832	5.22632		breast	232859	5.28513
urinary_tract	203735	4.8337		urinary_tract	204145	4.78803		urinary_tract	208336	4.72854
thyroid	191180	4.53583		thyroid	191316	4.48714		thyroid	192092	4.35986
oesophagus	159830	3.79203		oesophagus	160274	3.75908		oesophagus	165439	3.75492
haematopoietic_and_lymphoid_tissue	123170	2.92226		haematopoietic_and_lymphoid_tissue	124132	2.9114		haematopoietic_and_lymphoid_tissue	131053	2.97447
prostate	112978	2.68045		prostate	113953	2.67266		prostate	119624	2.71507
pancreas	91127	2.16203		pancreas	91982	2.15735		pancreas	96980	2.20113
central_nervous_system	88386	2.097		central_nervous_system	89018	2.08783		central_nervous_system	92042	2.08905
kidney	81971	1.9448		kidney	83691	1.96289		kidney	86514	1.96358
upper_aerodigestive_tract	81318	1.9293		upper_aerodigestive_tract	81717	1.9166		upper_aerodigestive_tract	83510	1.8954
endometrium	76541	1.81597		endometrium	77010	1.8062		endometrium	78724	1.78678
NS	63495	1.50645		NS	65341	1.53251		NS	66916	1.51877
biliary_tract	52717	1.25073		biliary_tract	53655	1.25843		biliary_tract	57334	1.30129
cervix	50240	1.19197		cervix	50246	1.17847		cervix	51257	1.16336
ovary	45957	1.09035		ovary	46443	1.08928		ovary	48713	1.10562
small_intestine	11544	0.273886		small_intestine	11756	0.275726		small_intestine	12055	0.273609
soft_tissue	10213	0.242308		soft_tissue	10578	0.248097		soft_tissue	11085	0.251593
bone	9674	0.22952		bone	9807	0.230014		bone	10358	0.235092
adrenal_gland	8516	0.202046		adrenal_gland	8554	0.200626		adrenal_gland	8936	0.202818
pleura	5300	0.125745		pleura	5322	0.124823		pleura	5470	0.124151
salivary_gland	4394	0.10425		salivary_gland	4451	0.104394		salivary_gland	4595	0.104291
peritoneum	3126	0.0741657		peritoneum	3349	0.0785476		peritoneum	3457	0.0784625
parathyroid	2404	0.0570359		parathyroid	2447	0.0573921		parathyroid	2551	0.0578993
autonomic_ganglia	2334	0.0553751		autonomic_ganglia	2400	0.0562897		autonomic_ganglia	2522	0.0572411
genital_tract	2246	0.0532873		genital_tract	2254	0.0528655		genital_tract	2345	0.0532238
pituitary	1066	0.0252913		pituitary	1088	0.025518		pituitary	1097	0.0248983
meninges	897	0.0212817		meninges	1017	0.0238528		meninges	1112	0.0252387
testis	873	0.0207123		testis	874	0.0204988		testis	903	0.0204951
thymus	863	0.020475		thymus	866	0.0203112		thymus	887	0.020132
eye	818	0.0194074		eye	842	0.0197483		eye	929	0.0210852
penis	749	0.0177703		penis	749	0.0175671		penis	753	0.0170906
fallopian_tube	132	0.00313176		fallopian_tube	132	0.00309594		fallopian_tube	132	0.00299596
vulva	38	0.000901566		vulva	42	0.000985071		vulva	45	0.00102135
placenta	36	0.000854115		placenta	36	0.000844346		placenta	37	0.000839778
gastrointestinal_tract_(site_indeterminate)	32	0.000759214		gastrointestinal_tract_(site_indeterminate)	37	0.0008678		gastrointestinal_tract_(site_indeterminate)	39	0.000885171
vagina	17	0.000403332		vagina	17	0.000398719		vagina	18	0.000408541
paratesticular_tissues	1	2.37254e-05		paratesticular_tissues	1	2.34541e-05		paratesticular_tissues	1	2.26967e-05
perineum	1	2.37254e-05		perineum	1	2.34541e-05		perineum	1	2.26967e-05
retroperitoneum	0	0		retroperitoneum	1	2.34541e-05		retroperitoneum	1	2.26967e-05
All	4214888	100		All	4263654	100		All	4405926	100
