# Supplementary material for: Use of signals of positive and negative selection to distinguish cancer genes and passenger genes
Source: eLife. 2021 Jan 11;10:e59629. doi: 10.7554/eLife.59629 (PMC7877913; doi:10.7554/eLife.59629)
Supplement: Supplementary file 11. — Transcripts of OGs (oncogenes) and TSGs (tumor suppressor genes) of the cancer gene list of Vogelstein et al., 2013 are highlighted by brick red and light blue backgrounds, respectively. Transcripts of CGC (Cancer Gene Census) genes (Sondka et al., 2018) that do not correspond to OGs or TSGs of the cancer gene list of Vogelstein et al., 2013 are highlighted by yellow background. Novel proto-oncogenes, TSGs and negatively selected tumor essential genes validated in the present work are shown in brown, dark blue, and green colors, respectively. For 3D representations of the data, see Figure 12. [file elife-59629-supp11.xlsx]

## Sheet: N0
Gene name; N0 (=29333)	Number of substitutions	fS	fM	fN	rSM	rNM	rNS	rSMN	rMSN	rNSM
KRAS	10661	0.00384579	0.995498	0.000656599	0.00386319	0.000659568	0.170732	0.00386064	221.104	0.00065703
KRAS_ENST00000256078	4842	0.00743494	0.991945	0.000619579	0.00749532	0.00062461	0.0833333	0.00749064	123.154	0.000619963
IDH1	1912	0.00732218	0.989017	0.00366109	0.00740349	0.00370175	0.5	0.00737619	90.0476	0.00367454
NRAS	1449	0.00759144	0.988958	0.00345066	0.0076762	0.00348918	0.454545	0.00764951	89.5625	0.0034626
PIK3CA	5839	0.0101045	0.98373	0.00616544	0.0102716	0.00626741	0.610169	0.0102076	60.4632	0.00620369
DUX4L1	116	0	0.982759	0.0172414				0	57	0.0175439
PIK3CA_ENST00000263967	4241	0.0103749	0.98208	0.00754539	0.0105642	0.00768307	0.727273	0.0104837	54.8026	0.00760276
BRAF	5024	0.0147293	0.980494	0.00477707	0.0150223	0.00487211	0.324324	0.0149495	50.2653	0.0048
MED12_ENST00000429213	50	0.02	0.98	0	0.0204082	0	0	0.0204082	49	0
HRAS	737	0.0149254	0.979647	0.00542741	0.0152355	0.00554017	0.363636	0.0151515	48.1333	0.00545703
DUX4L6	74	0	0.972973	0.027027				0	36	0.0277778
DUX4L3	71	0.028169	0.971831	0	0.0289855	0	0	0.0289855	34.5	0
CTNNB1	2518	0.0142971	0.971803	0.0138999	0.0147119	0.0143032	0.972222	0.0145044	34.4648	0.0140959
H3F3A	265	0.0264151	0.969811	0.00377358	0.0272374	0.00389105	0.142857	0.0271318	32.125	0.00378788
COX7B	33	0.030303	0.969697	0	0.03125	0	0	0.03125	32	0
KANSL2	31	0.0322581	0.967742	0	0.0333333	0	0	0.0333333	30	0
C9orf169	28	0.0357143	0.964286	0	0.037037	0	0	0.037037	27	0
DUX4L7	55	0	0.963636	0.0363636				0	26.5	0.0377358
HRAS_ENST00000397594	369	0.0243902	0.96206	0.0135501	0.0253521	0.0140845	0.555556	0.025	25.3571	0.0137363
C1orf54_ENST00000369098	25	0.04	0.96	0	0.0416667	0	0	0.0416667	24	0
AREG	24	0.0416667	0.958333	0	0.0434783	0	0	0.0434783	23	0
RNF223	24	0.0416667	0.958333	0	0.0434783	0	0	0.0434783	23	0
POLR1D_ENST00000302979	23	0.0434783	0.956522	0	0.0454545	0	0	0.0454545	22	0
ZC3H15_ENST00000544130	23	0	0.956522	0.0434783				0	22	0.0454545
MYD88	420	0.0309524	0.954762	0.0142857	0.032419	0.0149626	0.461538	0.031941	21.1053	0.0144928
MSTO1_ENST00000538143	22	0.0454545	0.954545	0	0.047619	0	0	0.047619	21	0
C17orf51	21	0.047619	0.952381	0	0.05	0	0	0.05	20	0
C17orf51_ENST00000391411	21	0.047619	0.952381	0	0.05	0	0	0.05	20	0
C6orf26	21	0.047619	0.952381	0	0.05	0	0	0.05	20	0
GMFB	21	0	0.952381	0.047619				0	20	0.05
Q6IPT3_HUMAN	21	0.047619	0.952381	0	0.05	0	0	0.05	20	0
RIMBP3C	21	0.047619	0.952381	0	0.05	0	0	0.05	20	0
C9orf80	20	0.05	0.95	0	0.0526316	0	0	0.0526316	19	0
MED21	20	0.05	0.95	0	0.0526316	0	0	0.0526316	19	0
JAK2	1888	0.0291314	0.947564	0.0233051	0.0307434	0.0245947	0.8	0.0300055	18.0707	0.0238612
LEPROTL1	19	0.0526316	0.947368	0	0.0555556	0	0	0.0555556	18	0
SF3B1	1209	0.0430108	0.945409	0.0115798	0.0454943	0.0122485	0.269231	0.0449438	17.3182	0.0117155
FAM153C	18	0.0555556	0.944444	0	0.0588235	0	0	0.0588235	17	0
FAM153C_ENST00000511856	18	0.0555556	0.944444	0	0.0588235	0	0	0.0588235	17	0
PPIAL4D	18	0.0555556	0.944444	0	0.0588235	0	0	0.0588235	17	0
RPS24_ENST00000372360	18	0.0555556	0.944444	0	0.0588235	0	0	0.0588235	17	0
GNAS	724	0.0345304	0.94337	0.0220994	0.0366032	0.0234261	0.64	0.0357654	16.6585	0.0225989
RHOA	308	0.0487013	0.941558	0.00974026	0.0517241	0.0103448	0.2	0.0511945	16.1111	0.00983607
AGBL3_ENST00000359383	17	0.0588235	0.941176	0	0.0625	0	0	0.0625	16	0
C13orf15	17	0.0588235	0.941176	0	0.0625	0	0	0.0625	16	0
C3orf49	17	0	0.941176	0.0588235				0	16	0.0625
CES4A_ENST00000535696	17	0.0588235	0.941176	0	0.0625	0	0	0.0625	16	0
CNIH	17	0.0588235	0.941176	0	0.0625	0	0	0.0625	16	0
DDX3Y	51	0.0392157	0.941176	0.0196078	0.0416667	0.0208333	0.5	0.0408163	16	0.02
ENSG00000197799	17	0.0588235	0.941176	0	0.0625	0	0	0.0625	16	0
ESCO2_ENST00000397418	17	0.0588235	0.941176	0	0.0625	0	0	0.0625	16	0
MAP7D2_ENST00000543767	17	0.0588235	0.941176	0	0.0625	0	0	0.0625	16	0
NLRP4	17	0.0588235	0.941176	0	0.0625	0	0	0.0625	16	0
NUDT8	17	0.0588235	0.941176	0	0.0625	0	0	0.0625	16	0
PTGER1	51	0.0588235	0.941176	0	0.0625	0	0	0.0625	16	0
SPOP	423	0.0283688	0.940898	0.0307329	0.0301508	0.0326633	1.08333	0.0291971	15.92	0.0317073
ADORA1_ENST00000367235	33	0.0606061	0.939394	0	0.0645161	0	0	0.0645161	15.5	0
AGAP10	49	0.0612245	0.938776	0	0.0652174	0	0	0.0652174	15.3333	0
AGAP10_ENST00000413193	49	0.0612245	0.938776	0	0.0652174	0	0	0.0652174	15.3333	0
C11orf70_ENST00000434758	32	0.03125	0.9375	0.03125	0.0333333	0.0333333	1	0.0322581	15	0.0322581
C3orf52_ENST00000430855	16	0.0625	0.9375	0	0.0666667	0	0	0.0666667	15	0
CA5BP1	16	0	0.9375	0.0625				0	15	0.0666667
CCL24	32	0.0625	0.9375	0	0.0666667	0	0	0.0666667	15	0
COA4	16	0.0625	0.9375	0	0.0666667	0	0	0.0666667	15	0
FAM153C_ENST00000507848	16	0.0625	0.9375	0	0.0666667	0	0	0.0666667	15	0
SUB1	16	0.0625	0.9375	0	0.0666667	0	0	0.0666667	15	0
IDH2	404	0.0420792	0.935644	0.0222772	0.0449735	0.0238095	0.529412	0.0439276	14.5385	0.0227848
CDV3_ENST00000431519	31	0.0645161	0.935484	0	0.0689655	0	0	0.0689655	14.5	0
PLA2G2A	31	0.0645161	0.935484	0	0.0689655	0	0	0.0689655	14.5	0
NFE2L2	610	0.0409836	0.934426	0.0245902	0.0438596	0.0263158	0.6	0.042735	14.25	0.0252101
ATRX_ENST00000400866	15	0.0666667	0.933333	0	0.0714286	0	0	0.0714286	14	0
CHCHD7	15	0.0666667	0.933333	0	0.0714286	0	0	0.0714286	14	0
CHCHD7_ENST00000303759	15	0.0666667	0.933333	0	0.0714286	0	0	0.0714286	14	0
DNAJC24	30	0.0333333	0.933333	0.0333333	0.0357143	0.0357143	1	0.0344828	14	0.0344828
hCG_1757335	15	0	0.933333	0.0666667				0	14	0.0714286
IL15_ENST00000477265	15	0.0666667	0.933333	0	0.0714286	0	0	0.0714286	14	0
KIAA0040	15	0	0.933333	0.0666667				0	14	0.0714286
MRPS36	15	0.0666667	0.933333	0	0.0714286	0	0	0.0714286	14	0
NAA50	30	0.0666667	0.933333	0	0.0714286	0	0	0.0714286	14	0
RUNDC2B	15	0.0666667	0.933333	0	0.0714286	0	0	0.0714286	14	0
SCT	15	0	0.933333	0.0666667				0	14	0.0714286
XAGE5_ENST00000375503	15	0.0666667	0.933333	0	0.0714286	0	0	0.0714286	14	0
U2AF1	337	0.0534125	0.931751	0.0148368	0.0573248	0.0159236	0.277778	0.0564263	13.6522	0.0150602
CBWD3	29	0.0689655	0.931034	0	0.0740741	0	0	0.0740741	13.5	0
SDHC_ENST00000342751	29	0.0689655	0.931034	0	0.0740741	0	0	0.0740741	13.5	0
DUX4L5	72	0.0416667	0.930556	0.0277778	0.0447761	0.0298507	0.666667	0.0434783	13.4	0.0285714
ERCC2_ENST00000485403	184	0.0652174	0.929348	0.00543478	0.0701754	0.00584795	0.0833333	0.0697674	13.1538	0.00546448
C1orf180	14	0.0714286	0.928571	0	0.0769231	0	0	0.0769231	13	0
CSAG4	14	0.0714286	0.928571	0	0.0769231	0	0	0.0769231	13	0
EIF1AX	126	0.0396825	0.928571	0.031746	0.042735	0.034188	0.8	0.0413223	13	0.0327869
GOLGA8O	14	0.0714286	0.928571	0	0.0769231	0	0	0.0769231	13	0
MARVELD1	14	0.0714286	0.928571	0	0.0769231	0	0	0.0769231	13	0
MECR_ENST00000453185	28	0.0714286	0.928571	0	0.0769231	0	0	0.0769231	13	0
RPS4Y1	14	0.0714286	0.928571	0	0.0769231	0	0	0.0769231	13	0
THEGL	28	0.0714286	0.928571	0	0.0769231	0	0	0.0769231	13	0
FGFR3	1284	0.0700935	0.928349	0.00155763	0.0755034	0.00167785	0.0222222	0.0753769	12.9565	0.00156006
METTL14	96	0.0520833	0.927083	0.0208333	0.0561798	0.0224719	0.4	0.0549451	12.7143	0.0212766
APOBEC3C	41	0.0731707	0.926829	0	0.0789474	0	0	0.0789474	12.6667	0
CCDC85C	27	0.0740741	0.925926	0	0.08	0	0	0.08	12.5	0
CCNI_ENST00000537948	27	0.0740741	0.925926	0	0.08	0	0	0.08	12.5	0
NCOA4_ENST00000452682	27	0.037037	0.925926	0.037037	0.04	0.04	1	0.0384615	12.5	0.0384615
OSTC	27	0.037037	0.925926	0.037037	0.04	0.04	1	0.0384615	12.5	0.0384615
APOO	40	0.025	0.925	0.05	0.027027	0.0540541	2	0.025641	12.3333	0.0526316
AKT1	509	0.0667976	0.923379	0.00982318	0.0723404	0.0106383	0.147059	0.0715789	12.0513	0.00992063
SRSF2	274	0.0620438	0.923358	0.0145985	0.0671937	0.0158103	0.235294	0.0661479	12.0476	0.0148148
MED12	2017	0.0525533	0.923153	0.0242935	0.056928	0.0263158	0.462264	0.0554683	12.0129	0.0248984
ABLIM1_ENST00000440467	39	0.0769231	0.923077	0	0.0833333	0	0	0.0833333	12	0
AC120042.2	13	0.0769231	0.923077	0	0.0833333	0	0	0.0833333	12	0
CDC42SE1	13	0	0.923077	0.0769231				0	12	0.0833333
CHCHD8	13	0.0769231	0.923077	0	0.0833333	0	0	0.0833333	12	0
ENSG00000185034	26	0.0769231	0.923077	0	0.0833333	0	0	0.0833333	12	0
ENSG00000187988	13	0	0.923077	0.0769231				0	12	0.0833333
ENSG00000267909	13	0.0769231	0.923077	0	0.0833333	0	0	0.0833333	12	0
ERVFC1	13	0.0769231	0.923077	0	0.0833333	0	0	0.0833333	12	0
FLJ45224	26	0.0769231	0.923077	0	0.0833333	0	0	0.0833333	12	0
FOXD4L3	65	0.0769231	0.923077	0	0.0833333	0	0	0.0833333	12	0
LOC389848	13	0	0.923077	0.0769231				0	12	0.0833333
MRPS6	26	0.0769231	0.923077	0	0.0833333	0	0	0.0833333	12	0
NT5C2_ENST00000452156	13	0.0769231	0.923077	0	0.0833333	0	0	0.0833333	12	0
SLC35E4_ENST00000406566	13	0.0769231	0.923077	0	0.0833333	0	0	0.0833333	12	0
ZNF705B	26	0.0769231	0.923077	0	0.0833333	0	0	0.0833333	12	0
ZNF705B_ENST00000443676	26	0.0769231	0.923077	0	0.0833333	0	0	0.0833333	12	0
SNUPN_ENST00000371091	38	0.0263158	0.921053	0.0526316	0.0285714	0.0571429	2	0.027027	11.6667	0.0555556
C10orf114	25	0.08	0.92	0	0.0869565	0	0	0.0869565	11.5	0
C3orf52_ENST00000431717	25	0.08	0.92	0	0.0869565	0	0	0.0869565	11.5	0
CDKL3_ENST00000435240	50	0.06	0.92	0.02	0.0652174	0.0217391	0.333333	0.0638298	11.5	0.0204082
ENSG00000262874	25	0.04	0.92	0.04	0.0434783	0.0434783	1	0.0416667	11.5	0.0416667
FAM180B	25	0.08	0.92	0	0.0869565	0	0	0.0869565	11.5	0
FAM180B_ENST00000356737	25	0.08	0.92	0	0.0869565	0	0	0.0869565	11.5	0
NUDT8_ENST00000376693	25	0.08	0.92	0	0.0869565	0	0	0.0869565	11.5	0
SCP2_ENST00000371513	25	0	0.92	0.08				0	11.5	0.0869565
KCNJ5	694	0.0720461	0.919308	0.00864553	0.0783699	0.00940439	0.12	0.0776398	11.3929	0.00872093
C11orf54_ENST00000331239	37	0.0540541	0.918919	0.027027	0.0588235	0.0294118	0.5	0.0571429	11.3333	0.0277778
NT5DC1	37	0.0810811	0.918919	0	0.0882353	0	0	0.0882353	11.3333	0
ZNF428	37	0.0810811	0.918919	0	0.0882353	0	0	0.0882353	11.3333	0
ERBB2_ENST00000541774	578	0.0692042	0.918685	0.0121107	0.0753296	0.0131827	0.175	0.0743494	11.2979	0.0122592
FBLN1_ENST00000340923	49	0.0612245	0.918367	0.0204082	0.0666667	0.0222222	0.333333	0.0652174	11.25	0.0208333
GSTA4	49	0.0204082	0.918367	0.0612245	0.0222222	0.0666667	3	0.0208333	11.25	0.0652174
ADAM8_ENST00000445355	24	0	0.916667	0.0833333				0	11	0.0909091
C5orf32	12	0.0833333	0.916667	0	0.0909091	0	0	0.0909091	11	0
C6orf130	24	0.0833333	0.916667	0	0.0909091	0	0	0.0909091	11	0
CCL19	12	0.0833333	0.916667	0	0.0909091	0	0	0.0909091	11	0
ENSG00000113811	12	0.0833333	0.916667	0	0.0909091	0	0	0.0909091	11	0
ENSG00000214788	12	0.0833333	0.916667	0	0.0909091	0	0	0.0909091	11	0
ENSG00000219545	12	0.0833333	0.916667	0	0.0909091	0	0	0.0909091	11	0
ENSG00000268674	12	0.0833333	0.916667	0	0.0909091	0	0	0.0909091	11	0
FAM219B	12	0.0833333	0.916667	0	0.0909091	0	0	0.0909091	11	0
FLJ16171	12	0.0833333	0.916667	0	0.0909091	0	0	0.0909091	11	0
GABPB1_ENST00000429662	60	0.0666667	0.916667	0.0166667	0.0727273	0.0181818	0.25	0.0714286	11	0.0169492
HSPB11_ENST00000371376	12	0.0833333	0.916667	0	0.0909091	0	0	0.0909091	11	0
KRTAP2-2_ENST00000542910	12	0	0.916667	0.0833333				0	11	0.0909091
LARP6_ENST00000344870	12	0.0833333	0.916667	0	0.0909091	0	0	0.0909091	11	0
MLXIP_ENST00000377037	24	0.0833333	0.916667	0	0.0909091	0	0	0.0909091	11	0
MRPL42_ENST00000549982	24	0.0833333	0.916667	0	0.0909091	0	0	0.0909091	11	0
MRPS22	84	0.0714286	0.916667	0.0119048	0.0779221	0.012987	0.166667	0.0769231	11	0.0120482
MS4A18	12	0	0.916667	0.0833333				0	11	0.0909091
MYL12B	36	0.0833333	0.916667	0	0.0909091	0	0	0.0909091	11	0
NKTR_ENST00000445842	12	0.0833333	0.916667	0	0.0909091	0	0	0.0909091	11	0
OR4F3	12	0.0833333	0.916667	0	0.0909091	0	0	0.0909091	11	0
PSMB7_ENST00000441097	36	0.0555556	0.916667	0.0277778	0.0606061	0.030303	0.5	0.0588235	11	0.0285714
Q9H4I0_HUMAN	12	0.0833333	0.916667	0	0.0909091	0	0	0.0909091	11	0
Q9NWP0_HUMAN	12	0.0833333	0.916667	0	0.0909091	0	0	0.0909091	11	0
RCOR3_ENST00000452621	48	0.0625	0.916667	0.0208333	0.0681818	0.0227273	0.333333	0.0666667	11	0.0212766
SYCE3	12	0.0833333	0.916667	0	0.0909091	0	0	0.0909091	11	0
SYCE3_ENST00000406915	12	0.0833333	0.916667	0	0.0909091	0	0	0.0909091	11	0
TRIM37_ENST00000393066	12	0.0833333	0.916667	0	0.0909091	0	0	0.0909091	11	0
UFM1_ENST00000379641	12	0	0.916667	0.0833333				0	11	0.0909091
ARL15	35	0.0285714	0.914286	0.0571429	0.03125	0.0625	2	0.0294118	10.6667	0.0606061
FOXL2	268	0.0783582	0.914179	0.00746269	0.0857143	0.00816327	0.0952381	0.0850202	10.6522	0.0075188
U2AF1_ENST00000380276	277	0.0685921	0.913357	0.0180505	0.0750988	0.0197628	0.263158	0.0736434	10.5417	0.0183824
COX6C	23	0.0869565	0.913043	0	0.0952381	0	0	0.0952381	10.5	0
NRG4	23	0.0869565	0.913043	0	0.0952381	0	0	0.0952381	10.5	0
NRTN	23	0.0869565	0.913043	0	0.0952381	0	0	0.0952381	10.5	0
RPL13	46	0.0869565	0.913043	0	0.0952381	0	0	0.0952381	10.5	0
SAT1_ENST00000379251	23	0.0869565	0.913043	0	0.0952381	0	0	0.0952381	10.5	0
BZW1_ENST00000452790	68	0.0588235	0.911765	0.0294118	0.0645161	0.0322581	0.5	0.0625	10.3333	0.030303
OLIG1	34	0.0882353	0.911765	0	0.0967742	0	0	0.0967742	10.3333	0
ACAA1_ENST00000544624	22	0.0909091	0.909091	0	0.1	0	0	0.1	10	0
ATP9B_ENST00000458297	11	0.0909091	0.909091	0	0.1	0	0	0.1	10	0
C2orf27B	22	0.0909091	0.909091	0	0.1	0	0	0.1	10	0
C9orf117_ENST00000373293	11	0.0909091	0.909091	0	0.1	0	0	0.1	10	0
COX6C_ENST00000520468	22	0.0909091	0.909091	0	0.1	0	0	0.1	10	0
DEFB131	22	0.0909091	0.909091	0	0.1	0	0	0.1	10	0
DISC1_ENST00000422590	11	0	0.909091	0.0909091				0	10	0.1
DUSP23	33	0.0909091	0.909091	0	0.1	0	0	0.1	10	0
LGALS7	22	0.0909091	0.909091	0	0.1	0	0	0.1	10	0
LIPM_ENST00000539337	22	0.0909091	0.909091	0	0.1	0	0	0.1	10	0
MRPL50	33	0.0606061	0.909091	0.030303	0.0666667	0.0333333	0.5	0.0645161	10	0.03125
MT-CO1	11	0.0909091	0.909091	0	0.1	0	0	0.1	10	0
MT-CO1_ENST00000361624	11	0.0909091	0.909091	0	0.1	0	0	0.1	10	0
MYOF_ENST00000371488	22	0.0909091	0.909091	0	0.1	0	0	0.1	10	0
PYGB_ENST00000428458	11	0.0909091	0.909091	0	0.1	0	0	0.1	10	0
RAD52_ENST00000545564	22	0.0909091	0.909091	0	0.1	0	0	0.1	10	0
UPK3BL	11	0	0.909091	0.0909091				0	10	0.1
ZDHHC17_ENST00000359019	11	0.0909091	0.909091	0	0.1	0	0	0.1	10	0
ZNF321P_ENST00000391777	11	0.0909091	0.909091	0	0.1	0	0	0.1	10	0
ZNF816_ENST00000434371	11	0.0909091	0.909091	0	0.1	0	0	0.1	10	0
METTL2A	43	0.0930233	0.906977	0	0.102564	0	0	0.102564	9.75	0
PRB3	150	0.0533333	0.906667	0.04	0.0588235	0.0441176	0.75	0.056338	9.71429	0.0416667
ZNF207_ENST00000394670	75	0.04	0.906667	0.0533333	0.0441176	0.0588235	1.33333	0.0416667	9.71429	0.056338
EGFR	1890	0.0814815	0.906349	0.0121693	0.0899008	0.0134267	0.149351	0.0887097	9.67797	0.0123192
C1orf31	32	0.0625	0.90625	0.03125	0.0689655	0.0344828	0.5	0.0666667	9.66667	0.0322581
ENSG00000196960	32	0.09375	0.90625	0	0.103448	0	0	0.103448	9.66667	0
ENSG00000205014	32	0.09375	0.90625	0	0.103448	0	0	0.103448	9.66667	0
PHLDA2	32	0.03125	0.90625	0.0625	0.0344828	0.0689655	2	0.0322581	9.66667	0.0666667
FAM200A	85	0.0705882	0.905882	0.0235294	0.0779221	0.025974	0.333333	0.0759494	9.625	0.0240964
BCL2L11_ENST00000337565	21	0.0952381	0.904762	0	0.105263	0	0	0.105263	9.5	0
COA6	21	0.0952381	0.904762	0	0.105263	0	0	0.105263	9.5	0
DDTL	21	0.0952381	0.904762	0	0.105263	0	0	0.105263	9.5	0
ELP5	21	0.047619	0.904762	0.047619	0.0526316	0.0526316	1	0.05	9.5	0.05
ENSG00000178225	21	0.047619	0.904762	0.047619	0.0526316	0.0526316	1	0.05	9.5	0.05
GNG7	21	0.0952381	0.904762	0	0.105263	0	0	0.105263	9.5	0
GOLGA8M	21	0.0952381	0.904762	0	0.105263	0	0	0.105263	9.5	0
GPS1_ENST00000306823	21	0.0952381	0.904762	0	0.105263	0	0	0.105263	9.5	0
LYSMD2	21	0	0.904762	0.0952381				0	9.5	0.105263
RAB19B	21	0.0952381	0.904762	0	0.105263	0	0	0.105263	9.5	0
SMUG1_ENST00000513838	21	0.047619	0.904762	0.047619	0.0526316	0.0526316	1	0.05	9.5	0.05
VNN3_ENST00000392393	21	0.0952381	0.904762	0	0.105263	0	0	0.105263	9.5	0
Q8NH98_HUMAN	31	0.0967742	0.903226	0	0.107143	0	0	0.107143	9.33333	0
SENP7_ENST00000394085	72	0.0555556	0.902778	0.0416667	0.0615385	0.0461538	0.75	0.0588235	9.28571	0.0434783
TMCO1	41	0.0243902	0.902439	0.0731707	0.027027	0.0810811	3	0.025	9.25	0.0789474
FAM174B	61	0.0983607	0.901639	0	0.109091	0	0	0.109091	9.16667	0
MAP2K1	272	0.0772059	0.900735	0.0220588	0.0857143	0.0244898	0.285714	0.0836653	9.07407	0.0225564
ARF4	30	0.1	0.9	0	0.111111	0	0	0.111111	9	0
BOLA3_ENST00000295326	10	0.1	0.9	0	0.111111	0	0	0.111111	9	0
C11orf55	10	0.1	0.9	0	0.111111	0	0	0.111111	9	0
C12orf73	10	0.1	0.9	0	0.111111	0	0	0.111111	9	0
C22orf26	20	0.1	0.9	0	0.111111	0	0	0.111111	9	0
C3orf52	30	0.1	0.9	0	0.111111	0	0	0.111111	9	0
C8orf49	10	0.1	0.9	0	0.111111	0	0	0.111111	9	0
CENPQ	40	0.1	0.9	0	0.111111	0	0	0.111111	9	0
COX5A	30	0.1	0.9	0	0.111111	0	0	0.111111	9	0
DDX17_ENST00000396821	50	0.08	0.9	0.02	0.0888889	0.0222222	0.25	0.0869565	9	0.0204082
DPCD_ENST00000416979	10	0	0.9	0.1				0	9	0.111111
ENSG00000165429	10	0.1	0.9	0	0.111111	0	0	0.111111	9	0
ENSG00000188082	10	0.1	0.9	0	0.111111	0	0	0.111111	9	0
ENSG00000269279	10	0.1	0.9	0	0.111111	0	0	0.111111	9	0
GSTM1	30	0.0666667	0.9	0.0333333	0.0740741	0.037037	0.5	0.0714286	9	0.0344828
HIGD1C	10	0	0.9	0.1				0	9	0.111111
HTN3	10	0.1	0.9	0	0.111111	0	0	0.111111	9	0
IFNA1	20	0.1	0.9	0	0.111111	0	0	0.111111	9	0
IGF1	80	0.075	0.9	0.025	0.0833333	0.0277778	0.333333	0.0810811	9	0.025641
LRRD1_ENST00000454089	20	0.05	0.9	0.05	0.0555556	0.0555556	1	0.0526316	9	0.0526316
NIT1_ENST00000368007	40	0.075	0.9	0.025	0.0833333	0.0277778	0.333333	0.0810811	9	0.025641
OLFM1_ENST00000277415	10	0.1	0.9	0	0.111111	0	0	0.111111	9	0
OR4F29	20	0.1	0.9	0	0.111111	0	0	0.111111	9	0
PAGE2B	20	0.1	0.9	0	0.111111	0	0	0.111111	9	0
Q5JYU7_HUMAN	10	0.1	0.9	0	0.111111	0	0	0.111111	9	0
Q8NGD7_HUMAN	10	0.1	0.9	0	0.111111	0	0	0.111111	9	0
Q96RW6_HUMAN	10	0.1	0.9	0	0.111111	0	0	0.111111	9	0
Q9NU36_HUMAN	20	0.1	0.9	0	0.111111	0	0	0.111111	9	0
RGS11_ENST00000431291	10	0.1	0.9	0	0.111111	0	0	0.111111	9	0
RTN3_ENST00000356000	40	0.1	0.9	0	0.111111	0	0	0.111111	9	0
VNN3_ENST00000425515	20	0.1	0.9	0	0.111111	0	0	0.111111	9	0
ZACN_ENST00000392503	10	0.1	0.9	0	0.111111	0	0	0.111111	9	0
FOXO6	49	0.0816327	0.897959	0.0204082	0.0909091	0.0227273	0.25	0.0888889	8.8	0.0208333
C9orf141	39	0.102564	0.897436	0	0.114286	0	0	0.114286	8.75	0
LOC390956	39	0.102564	0.897436	0	0.114286	0	0	0.114286	8.75	0
SYCE2	39	0.102564	0.897436	0	0.114286	0	0	0.114286	8.75	0
BEX5	29	0.103448	0.896552	0	0.115385	0	0	0.115385	8.66667	0
RAD9B	29	0.0344828	0.896552	0.0689655	0.0384615	0.0769231	2	0.0357143	8.66667	0.0740741
SKA2_ENST00000330137	29	0.0689655	0.896552	0.0344828	0.0769231	0.0384615	0.5	0.0740741	8.66667	0.0357143
TOMM22	29	0.103448	0.896552	0	0.115385	0	0	0.115385	8.66667	0
ERBB2	969	0.0897833	0.895769	0.0144479	0.10023	0.016129	0.16092	0.0986395	8.59406	0.0146597
PEX13	67	0.0895522	0.895522	0.0149254	0.1	0.0166667	0.166667	0.0983607	8.57143	0.0151515
AC114772.1	19	0.105263	0.894737	0	0.117647	0	0	0.117647	8.5	0
AC114772.1_ENST00000339092	19	0.105263	0.894737	0	0.117647	0	0	0.117647	8.5	0
C1orf110	76	0.0921053	0.894737	0.0131579	0.102941	0.0147059	0.142857	0.101449	8.5	0.0133333
CCDC169_ENST00000239859	38	0.105263	0.894737	0	0.117647	0	0	0.117647	8.5	0
COX20	19	0.105263	0.894737	0	0.117647	0	0	0.117647	8.5	0
CYS1	19	0.105263	0.894737	0	0.117647	0	0	0.117647	8.5	0
DTYMK	38	0.105263	0.894737	0	0.117647	0	0	0.117647	8.5	0
EAF1	38	0.105263	0.894737	0	0.117647	0	0	0.117647	8.5	0
FAM36A	19	0.105263	0.894737	0	0.117647	0	0	0.117647	8.5	0
IL18BP_ENST00000393707	19	0.0526316	0.894737	0.0526316	0.0588235	0.0588235	1	0.0555556	8.5	0.0555556
KMO_ENST00000366555	19	0.105263	0.894737	0	0.117647	0	0	0.117647	8.5	0
LCE2D	57	0.105263	0.894737	0	0.117647	0	0	0.117647	8.5	0
PSMA6	38	0.0789474	0.894737	0.0263158	0.0882353	0.0294118	0.333333	0.0857143	8.5	0.027027
ZNRF1_ENST00000320619	38	0.105263	0.894737	0	0.117647	0	0	0.117647	8.5	0
AR_ENST00000396043	237	0.0421941	0.894515	0.0632911	0.0471698	0.0707547	1.5	0.0440529	8.48	0.0675676
CCNYL1_ENST00000339882	47	0.106383	0.893617	0	0.119048	0	0	0.119048	8.4	0
GOLGA8N	47	0.0638298	0.893617	0.0425532	0.0714286	0.047619	0.666667	0.0681818	8.4	0.0444444
PSMB7	47	0.0851064	0.893617	0.0212766	0.0952381	0.0238095	0.25	0.0930233	8.4	0.0217391
CCNYL3	28	0.0357143	0.892857	0.0714286	0.04	0.08	2	0.037037	8.33333	0.0769231
FAM177A1	28	0.107143	0.892857	0	0.12	0	0	0.12	8.33333	0
GFER	28	0.0357143	0.892857	0.0714286	0.04	0.08	2	0.037037	8.33333	0.0769231
RAC1	167	0.101796	0.892216	0.00598802	0.114094	0.00671141	0.0588235	0.113333	8.27778	0.0060241
CCDC29	37	0.0810811	0.891892	0.027027	0.0909091	0.030303	0.333333	0.0882353	8.25	0.0277778
CDV3	37	0.0810811	0.891892	0.027027	0.0909091	0.030303	0.333333	0.0882353	8.25	0.0277778
CTAGE9	74	0.0810811	0.891892	0.027027	0.0909091	0.030303	0.333333	0.0882353	8.25	0.0277778
CTAGE9_ENST00000314099	74	0.0810811	0.891892	0.027027	0.0909091	0.030303	0.333333	0.0882353	8.25	0.0277778
PPM1B_ENST00000409895	37	0.0810811	0.891892	0.027027	0.0909091	0.030303	0.333333	0.0882353	8.25	0.0277778
TULP3_ENST00000535226	37	0.0810811	0.891892	0.027027	0.0909091	0.030303	0.333333	0.0882353	8.25	0.0277778
RAD51B_ENST00000471583	83	0.0843373	0.891566	0.0240964	0.0945946	0.027027	0.285714	0.0921053	8.22222	0.0246914
CCNYL1	46	0.0869565	0.891304	0.0217391	0.097561	0.0243902	0.25	0.0952381	8.2	0.0222222
NAA10	46	0.108696	0.891304	0	0.121951	0	0	0.121951	8.2	0
APOBEC3H	55	0.0909091	0.890909	0.0181818	0.102041	0.0204082	0.2	0.1	8.16667	0.0185185
KLHL23	100	0.09	0.89	0.02	0.101124	0.0224719	0.222222	0.0989011	8.09091	0.0204082
ERBB3_ENST00000411731	145	0.0758621	0.889655	0.0344828	0.0852713	0.0387597	0.454545	0.0820896	8.0625	0.0357143
ANKRD36BP1	9	0.111111	0.888889	0	0.125	0	0	0.125	8	0
ANKRD36BP1_ENST00000358576	9	0.111111	0.888889	0	0.125	0	0	0.125	8	0
C10orf131	18	0.111111	0.888889	0	0.125	0	0	0.125	8	0
C12orf62	9	0.111111	0.888889	0	0.125	0	0	0.125	8	0
C19orf60	18	0.111111	0.888889	0	0.125	0	0	0.125	8	0
C22orf39	9	0.111111	0.888889	0	0.125	0	0	0.125	8	0
C2orf68_ENST00000409734	9	0.111111	0.888889	0	0.125	0	0	0.125	8	0
C4orf46	27	0.0740741	0.888889	0.037037	0.0833333	0.0416667	0.5	0.08	8	0.0384615
C5orf53	18	0.111111	0.888889	0	0.125	0	0	0.125	8	0
C8orf82_ENST00000313465	18	0.111111	0.888889	0	0.125	0	0	0.125	8	0
CCDC107_ENST00000421582	18	0.111111	0.888889	0	0.125	0	0	0.125	8	0
CCL17	18	0.0555556	0.888889	0.0555556	0.0625	0.0625	1	0.0588235	8	0.0588235
CDC26	18	0.0555556	0.888889	0.0555556	0.0625	0.0625	1	0.0588235	8	0.0588235
CHRD_ENST00000310236	9	0.111111	0.888889	0	0.125	0	0	0.125	8	0
CKS2	18	0.0555556	0.888889	0.0555556	0.0625	0.0625	1	0.0588235	8	0.0588235
CTXN2	18	0.111111	0.888889	0	0.125	0	0	0.125	8	0
CTXN2_ENST00000417307	18	0.111111	0.888889	0	0.125	0	0	0.125	8	0
DNAJC25-GNG10	36	0.111111	0.888889	0	0.125	0	0	0.125	8	0
DYDC2_ENST00000372198	18	0.111111	0.888889	0	0.125	0	0	0.125	8	0
ENSG00000198567	9	0.111111	0.888889	0	0.125	0	0	0.125	8	0
ENSG00000203951	9	0.111111	0.888889	0	0.125	0	0	0.125	8	0
ENSG00000214967	18	0.111111	0.888889	0	0.125	0	0	0.125	8	0
ENSG00000268927	9	0.111111	0.888889	0	0.125	0	0	0.125	8	0
FAM177A1_ENST00000280987	27	0.111111	0.888889	0	0.125	0	0	0.125	8	0
GLIPR1L2_ENST00000378689	9	0.111111	0.888889	0	0.125	0	0	0.125	8	0
HAUS2	36	0.0277778	0.888889	0.0833333	0.03125	0.09375	3	0.0285714	8	0.0909091
HSFX1	9	0.111111	0.888889	0	0.125	0	0	0.125	8	0
IL11	36	0.0833333	0.888889	0.0277778	0.09375	0.03125	0.333333	0.0909091	8	0.0285714
KRTAP20-1	27	0.037037	0.888889	0.0740741	0.0416667	0.0833333	2	0.0384615	8	0.08
LOC442464	9	0.111111	0.888889	0	0.125	0	0	0.125	8	0
MAGEA13P	9	0.111111	0.888889	0	0.125	0	0	0.125	8	0
MBD3L2	9	0.111111	0.888889	0	0.125	0	0	0.125	8	0
MRPL42	27	0.0740741	0.888889	0.037037	0.0833333	0.0416667	0.5	0.08	8	0.0384615
MTRF1_ENST00000430347	9	0.111111	0.888889	0	0.125	0	0	0.125	8	0
NANS_ENST00000427646	9	0.111111	0.888889	0	0.125	0	0	0.125	8	0
NDP	18	0.111111	0.888889	0	0.125	0	0	0.125	8	0
NMNAT1_ENST00000403197	18	0.0555556	0.888889	0.0555556	0.0625	0.0625	1	0.0588235	8	0.0588235
PDSS2_ENST00000449027	9	0.111111	0.888889	0	0.125	0	0	0.125	8	0
PGA4	27	0.111111	0.888889	0	0.125	0	0	0.125	8	0
PRR20D	9	0.111111	0.888889	0	0.125	0	0	0.125	8	0
PSMD5_ENST00000373903	18	0.111111	0.888889	0	0.125	0	0	0.125	8	0
PTMS_ENST00000389462	9	0.111111	0.888889	0	0.125	0	0	0.125	8	0
Q8N7Z9_HUMAN	9	0.111111	0.888889	0	0.125	0	0	0.125	8	0
RAP1A	36	0.111111	0.888889	0	0.125	0	0	0.125	8	0
RPS24	36	0.111111	0.888889	0	0.125	0	0	0.125	8	0
RPS26P11	9	0.111111	0.888889	0	0.125	0	0	0.125	8	0
SSX2	9	0.111111	0.888889	0	0.125	0	0	0.125	8	0
SUSD4_ENST00000342943	9	0.111111	0.888889	0	0.125	0	0	0.125	8	0
TADA2A_ENST00000394395	27	0.111111	0.888889	0	0.125	0	0	0.125	8	0
TCEAL7	18	0	0.888889	0.111111				0	8	0.125
TMEM221	18	0.111111	0.888889	0	0.125	0	0	0.125	8	0
TMEM238	9	0	0.888889	0.111111				0	8	0.125
UTRN_ENST00000367525	9	0.111111	0.888889	0	0.125	0	0	0.125	8	0
MYCN	286	0.0909091	0.888112	0.020979	0.102362	0.023622	0.230769	0.1	7.9375	0.0214286
CAPZA1	62	0.0967742	0.887097	0.016129	0.109091	0.0181818	0.166667	0.107143	7.85714	0.0163934
PTPRS_ENST00000262963	416	0.0865385	0.887019	0.0264423	0.097561	0.0298103	0.305556	0.0947368	7.85106	0.0271605
EIF2S1	53	0.113208	0.886792	0	0.12766	0	0	0.12766	7.83333	0
ERBB3_ENST00000267101	767	0.0925684	0.886571	0.0208605	0.104412	0.0235294	0.225352	0.102011	7.81609	0.0213049
C11orf54	44	0.0681818	0.886364	0.0454545	0.0769231	0.0512821	0.666667	0.0731707	7.8	0.047619
EFNA1	44	0.113636	0.886364	0	0.128205	0	0	0.128205	7.8	0
RAD1	44	0.0454545	0.886364	0.0681818	0.0512821	0.0769231	1.5	0.047619	7.8	0.0731707
TMEM217_ENST00000356757	44	0.0909091	0.886364	0.0227273	0.102564	0.025641	0.25	0.1	7.8	0.0232558
PRB3_ENST00000538488	149	0.0671141	0.885906	0.0469799	0.0757576	0.0530303	0.7	0.0719424	7.76471	0.0492958
CT62	35	0.114286	0.885714	0	0.129032	0	0	0.129032	7.75	0
DIAPH1_ENST00000253811	35	0.114286	0.885714	0	0.129032	0	0	0.129032	7.75	0
R3HCC1L	35	0.0571429	0.885714	0.0571429	0.0645161	0.0645161	1	0.0606061	7.75	0.0606061
TMEM87A_ENST00000307216	35	0.114286	0.885714	0	0.129032	0	0	0.129032	7.75	0
C19orf34	26	0.115385	0.884615	0	0.130435	0	0	0.130435	7.66667	0
DYSFIP1	26	0.0769231	0.884615	0.0384615	0.0869565	0.0434783	0.5	0.0833333	7.66667	0.04
ENSG00000206532	26	0.0769231	0.884615	0.0384615	0.0869565	0.0434783	0.5	0.0833333	7.66667	0.04
PRAMEF9	78	0.115385	0.884615	0	0.130435	0	0	0.130435	7.66667	0
SF3B1_ENST00000414963	26	0.0769231	0.884615	0.0384615	0.0869565	0.0434783	0.5	0.0833333	7.66667	0.04
SH2D6_ENST00000389938	26	0.115385	0.884615	0	0.130435	0	0	0.130435	7.66667	0
KIT	1081	0.0980574	0.884366	0.0175763	0.110879	0.0198745	0.179245	0.108718	7.648	0.0178908
DEGS1	69	0.101449	0.884058	0.0144928	0.114754	0.0163934	0.142857	0.112903	7.625	0.0147059
CAPN2_ENST00000433674	43	0.116279	0.883721	0	0.131579	0	0	0.131579	7.6	0
CCDC117	43	0.0930233	0.883721	0.0232558	0.105263	0.0263158	0.25	0.102564	7.6	0.0238095
NPIP_ENST00000432470	43	0.0697674	0.883721	0.0465116	0.0789474	0.0526316	0.666667	0.075	7.6	0.0487805
CTBS	60	0.116667	0.883333	0	0.132075	0	0	0.132075	7.57143	0
EIF3M	77	0.0649351	0.883117	0.0519481	0.0735294	0.0588235	0.8	0.0694444	7.55556	0.0547945
AC011551.2	17	0.117647	0.882353	0	0.133333	0	0	0.133333	7.5	0
AC011551.2_ENST00000414155	17	0.117647	0.882353	0	0.133333	0	0	0.133333	7.5	0
COX19	17	0	0.882353	0.117647				0	7.5	0.133333
EFNA4_ENST00000359751	34	0.117647	0.882353	0	0.133333	0	0	0.133333	7.5	0
FGF22	17	0.117647	0.882353	0	0.133333	0	0	0.133333	7.5	0
NIF3L1	68	0.0882353	0.882353	0.0294118	0.1	0.0333333	0.333333	0.0967742	7.5	0.030303
PPA1_ENST00000373230	17	0.0588235	0.882353	0.0588235	0.0666667	0.0666667	1	0.0625	7.5	0.0625
REG4_ENST00000369401	17	0.117647	0.882353	0	0.133333	0	0	0.133333	7.5	0
RIC3_ENST00000419822	34	0.0588235	0.882353	0.0588235	0.0666667	0.0666667	1	0.0625	7.5	0.0625
RNF175_ENST00000274068	34	0.117647	0.882353	0	0.133333	0	0	0.133333	7.5	0
SHB_ENST00000377700	34	0.0882353	0.882353	0.0294118	0.1	0.0333333	0.333333	0.0967742	7.5	0.030303
TAB3_ENST00000378928	17	0.0588235	0.882353	0.0588235	0.0666667	0.0666667	1	0.0625	7.5	0.0625
TMEM154	34	0.0882353	0.882353	0.0294118	0.1	0.0333333	0.333333	0.0967742	7.5	0.030303
RFX7_ENST00000317318	59	0.101695	0.881356	0.0169492	0.115385	0.0192308	0.166667	0.113208	7.42857	0.0172414
C15orf29	42	0.0952381	0.880952	0.0238095	0.108108	0.027027	0.25	0.105263	7.4	0.0243902
ZDHHC16_ENST00000370846	42	0.119048	0.880952	0	0.135135	0	0	0.135135	7.4	0
PTPN11	527	0.0910816	0.880455	0.028463	0.103448	0.0323276	0.3125	0.100209	7.36508	0.0292969
HIST3H3	92	0.119565	0.880435	0	0.135802	0	0	0.135802	7.36364	0
NKX3-1	92	0.076087	0.880435	0.0434783	0.0864198	0.0493827	0.571429	0.0823529	7.36364	0.0454545
CCDC42B	25	0.04	0.88	0.08	0.0454545	0.0909091	2	0.0416667	7.33333	0.0869565
FAM33A	25	0.04	0.88	0.08	0.0454545	0.0909091	2	0.0416667	7.33333	0.0869565
GOLGA8B	50	0.12	0.88	0	0.136364	0	0	0.136364	7.33333	0
GOLGA8B_ENST00000267731	50	0.12	0.88	0	0.136364	0	0	0.136364	7.33333	0
MRRF_ENST00000546115	25	0.08	0.88	0.04	0.0909091	0.0454545	0.5	0.0869565	7.33333	0.0416667
PLEKHF2	50	0.1	0.88	0.02	0.113636	0.0227273	0.2	0.111111	7.33333	0.0204082
TMEM180_ENST00000369931	25	0.12	0.88	0	0.136364	0	0	0.136364	7.33333	0
TMEM217	50	0.08	0.88	0.04	0.0909091	0.0454545	0.5	0.0869565	7.33333	0.0416667
RUNX1_ENST00000344691	141	0.035461	0.879433	0.0851064	0.0403226	0.0967742	2.4	0.0367647	7.29412	0.0930233
PPIE_ENST00000356511	58	0.103448	0.87931	0.0172414	0.117647	0.0196078	0.166667	0.115385	7.28571	0.0175439
EFNA4_ENST00000427683	33	0.121212	0.878788	0	0.137931	0	0	0.137931	7.25	0
GNG4	33	0.121212	0.878788	0	0.137931	0	0	0.137931	7.25	0
IL15	33	0.121212	0.878788	0	0.137931	0	0	0.137931	7.25	0
PCMT1_ENST00000464889	33	0.121212	0.878788	0	0.137931	0	0	0.137931	7.25	0
ASAH1_ENST00000381733	74	0.0810811	0.878378	0.0405405	0.0923077	0.0461538	0.5	0.0882353	7.22222	0.0422535
VEGFA_ENST00000482630	74	0.0675676	0.878378	0.0540541	0.0769231	0.0615385	0.8	0.0724638	7.22222	0.0571429
LDHA_ENST00000396222	41	0.121951	0.878049	0	0.138889	0	0	0.138889	7.2	0
NIPSNAP3A	41	0.121951	0.878049	0	0.138889	0	0	0.138889	7.2	0
RAB5A	41	0.097561	0.878049	0.0243902	0.111111	0.0277778	0.25	0.108108	7.2	0.025
RAC1_ENST00000356142	164	0.115854	0.878049	0.00609756	0.131944	0.00694444	0.0526316	0.131034	7.2	0.00613497
DUX4L4	90	0.122222	0.877778	0	0.139241	0	0	0.139241	7.18182	0
SDHB	90	0.0555556	0.877778	0.0666667	0.0632911	0.0759494	1.2	0.0588235	7.18182	0.0714286
RARA_ENST00000394081	187	0.112299	0.877005	0.0106952	0.128049	0.0121951	0.0952381	0.126506	7.13043	0.0108108
LRRC67	65	0.123077	0.876923	0	0.140351	0	0	0.140351	7.125	0
NIF3L1_ENST00000409020	73	0.0958904	0.876712	0.0273973	0.109375	0.03125	0.285714	0.106061	7.11111	0.028169
RPL10	73	0.123288	0.876712	0	0.140625	0	0	0.140625	7.11111	0
SH2B3_ENST00000538307	73	0.0821918	0.876712	0.0410959	0.09375	0.046875	0.5	0.0895522	7.11111	0.0428571
RUNX1_ENST00000325074	137	0.0364964	0.875912	0.0875912	0.0416667	0.1	2.4	0.0378788	7.05882	0.096
PPP2R1A	441	0.0997732	0.875283	0.0249433	0.11399	0.0284974	0.25	0.110831	7.01818	0.0255814
ACAT1	72	0.0972222	0.875	0.0277778	0.111111	0.031746	0.285714	0.107692	7	0.0285714
AMY1B	8	0.125	0.875	0	0.142857	0	0	0.142857	7	0
ASAH1	72	0.0833333	0.875	0.0416667	0.0952381	0.047619	0.5	0.0909091	7	0.0434783
C10orf131_ENST00000371202	16	0.125	0.875	0	0.142857	0	0	0.142857	7	0
C19orf53	24	0.125	0.875	0	0.142857	0	0	0.142857	7	0
C21orf88	16	0.0625	0.875	0.0625	0.0714286	0.0714286	1	0.0666667	7	0.0666667
C2CD4B	32	0.125	0.875	0	0.142857	0	0	0.142857	7	0
CLEC18A_ENST00000449317	8	0.125	0.875	0	0.142857	0	0	0.142857	7	0
COMMD8	40	0.025	0.875	0.1	0.0285714	0.114286	4	0.025641	7	0.111111
CRIPT	16	0.125	0.875	0	0.142857	0	0	0.142857	7	0
CXorf28	8	0.125	0.875	0	0.142857	0	0	0.142857	7	0
EGFR_ENST00000342916	272	0.113971	0.875	0.0110294	0.130252	0.012605	0.0967742	0.128631	7	0.0111524
EML4	8	0.125	0.875	0	0.142857	0	0	0.142857	7	0
ENSG00000179066	8	0.125	0.875	0	0.142857	0	0	0.142857	7	0
ENSG00000205664	8	0	0.875	0.125				0	7	0.142857
ENSG00000215019	8	0.125	0.875	0	0.142857	0	0	0.142857	7	0
ENSG00000215570	16	0.125	0.875	0	0.142857	0	0	0.142857	7	0
ENSG00000229070	8	0.125	0.875	0	0.142857	0	0	0.142857	7	0
ENSG00000267531	8	0.125	0.875	0	0.142857	0	0	0.142857	7	0
ENSG00000269636	8	0.125	0.875	0	0.142857	0	0	0.142857	7	0
FAM182B_ENST00000376404	8	0.125	0.875	0	0.142857	0	0	0.142857	7	0
FBXO47	88	0.0681818	0.875	0.0568182	0.0779221	0.0649351	0.833333	0.0731707	7	0.060241
FRMPD4	8	0	0.875	0.125				0	7	0.142857
GCSH	16	0.125	0.875	0	0.142857	0	0	0.142857	7	0
GTF2A2	16	0.125	0.875	0	0.142857	0	0	0.142857	7	0
GTF2H2	8	0.125	0.875	0	0.142857	0	0	0.142857	7	0
GTPBP2_ENST00000432918	8	0.125	0.875	0	0.142857	0	0	0.142857	7	0
HAUS1	48	0.125	0.875	0	0.142857	0	0	0.142857	7	0
KRTAP1-5	88	0.102273	0.875	0.0227273	0.116883	0.025974	0.222222	0.113924	7	0.0232558
KRTAP2-1_ENST00000542137	16	0	0.875	0.125				0	7	0.142857
KRTAP23-1	24	0.125	0.875	0	0.142857	0	0	0.142857	7	0
LOC392559	8	0.125	0.875	0	0.142857	0	0	0.142857	7	0
LOC56901	8	0.125	0.875	0	0.142857	0	0	0.142857	7	0
LSM5	8	0.125	0.875	0	0.142857	0	0	0.142857	7	0
MIER3	80	0.1125	0.875	0.0125	0.128571	0.0142857	0.111111	0.126761	7	0.0126582
MOBP_ENST00000420739	40	0.125	0.875	0	0.142857	0	0	0.142857	7	0
NDUFA4L2	8	0.125	0.875	0	0.142857	0	0	0.142857	7	0
NLRP5	8	0.125	0.875	0	0.142857	0	0	0.142857	7	0
NOX1_ENST00000372964	16	0.125	0.875	0	0.142857	0	0	0.142857	7	0
NUTM2A	40	0.125	0.875	0	0.142857	0	0	0.142857	7	0
POLE3	24	0.125	0.875	0	0.142857	0	0	0.142857	7	0
PPA2_ENST00000310267	16	0.125	0.875	0	0.142857	0	0	0.142857	7	0
PPAPDC1A_ENST00000541332	40	0.075	0.875	0.05	0.0857143	0.0571429	0.666667	0.0810811	7	0.0526316
PPIF_ENST00000448165	8	0.125	0.875	0	0.142857	0	0	0.142857	7	0
PTPN20C_ENST00000455582	8	0.125	0.875	0	0.142857	0	0	0.142857	7	0
Q6ZVS6_HUMAN	8	0.125	0.875	0	0.142857	0	0	0.142857	7	0
Q96QE0_HUMAN	8	0.125	0.875	0	0.142857	0	0	0.142857	7	0
RAB6A_ENST00000336083	40	0.1	0.875	0.025	0.114286	0.0285714	0.25	0.111111	7	0.025641
RAPH1_ENST00000319170	24	0.125	0.875	0	0.142857	0	0	0.142857	7	0
RASA4_ENST00000262940	48	0.125	0.875	0	0.142857	0	0	0.142857	7	0
RPL30	16	0.125	0.875	0	0.142857	0	0	0.142857	7	0
RPP30_ENST00000277882	32	0.125	0.875	0	0.142857	0	0	0.142857	7	0
S100PBP_ENST00000398243	32	0.125	0.875	0	0.142857	0	0	0.142857	7	0
SAP30	24	0.125	0.875	0	0.142857	0	0	0.142857	7	0
SCGB1D1	40	0.125	0.875	0	0.142857	0	0	0.142857	7	0
SEPT11_ENST00000541121	8	0.125	0.875	0	0.142857	0	0	0.142857	7	0
SGPL1_ENST00000409118	8	0.125	0.875	0	0.142857	0	0	0.142857	7	0
SLC25A27_ENST00000425120	32	0.03125	0.875	0.09375	0.0357143	0.107143	3	0.0322581	7	0.103448
SPAG11B_ENST00000359758	8	0	0.875	0.125				0	7	0.142857
SPCS3_ENST00000503362	24	0.125	0.875	0	0.142857	0	0	0.142857	7	0
STX12_ENST00000440806	24	0.0833333	0.875	0.0416667	0.0952381	0.047619	0.5	0.0909091	7	0.0434783
TARS2_ENST00000369053	32	0.09375	0.875	0.03125	0.107143	0.0357143	0.333333	0.103448	7	0.0322581
TMA7	8	0.125	0.875	0	0.142857	0	0	0.142857	7	0
TMCO1_ENST00000367881	56	0.0714286	0.875	0.0535714	0.0816327	0.0612245	0.75	0.0769231	7	0.0566038
TMEM210	8	0.125	0.875	0	0.142857	0	0	0.142857	7	0
TOB2P1	8	0.125	0.875	0	0.142857	0	0	0.142857	7	0
TRAPPC6B	24	0.0416667	0.875	0.0833333	0.047619	0.0952381	2	0.0434783	7	0.0909091
TSPY8_ENST00000287721	8	0.125	0.875	0	0.142857	0	0	0.142857	7	0
ZNF789_ENST00000379724	8	0.125	0.875	0	0.142857	0	0	0.142857	7	0
ERCC2_ENST00000391945	349	0.114613	0.873926	0.0114613	0.131148	0.0131148	0.1	0.12945	6.93182	0.0115942
C8orf47	79	0.101266	0.873418	0.0253165	0.115942	0.0289855	0.25	0.112676	6.9	0.025974
BRMS1L	63	0.111111	0.873016	0.015873	0.127273	0.0181818	0.142857	0.125	6.875	0.016129
BZW1	63	0.0793651	0.873016	0.047619	0.0909091	0.0545455	0.6	0.0862069	6.875	0.05
RGS16	55	0.109091	0.872727	0.0181818	0.125	0.0208333	0.166667	0.122449	6.85714	0.0185185
RPS24_ENST00000440692	55	0.109091	0.872727	0.0181818	0.125	0.0208333	0.166667	0.122449	6.85714	0.0185185
TXLNA	110	0.118182	0.872727	0.00909091	0.135417	0.0104167	0.0769231	0.134021	6.85714	0.00917431
C7orf47	47	0.106383	0.87234	0.0212766	0.121951	0.0243902	0.2	0.119048	6.83333	0.0217391
GOLGA8B_ENST00000438958	47	0.12766	0.87234	0	0.146341	0	0	0.146341	6.83333	0
RASA4	47	0.12766	0.87234	0	0.146341	0	0	0.146341	6.83333	0
ERBB3	814	0.100737	0.872236	0.027027	0.115493	0.0309859	0.268293	0.112022	6.82692	0.0277778
ARL6IP4_ENST00000392435	39	0.128205	0.871795	0	0.147059	0	0	0.147059	6.8	0
MSTO1	78	0.128205	0.871795	0	0.147059	0	0	0.147059	6.8	0
RTN3_ENST00000341307	39	0.128205	0.871795	0	0.147059	0	0	0.147059	6.8	0
ZNF844	234	0.106838	0.871795	0.0213675	0.122549	0.0245098	0.2	0.119617	6.8	0.0218341
ZNRF1	39	0.128205	0.871795	0	0.147059	0	0	0.147059	6.8	0
EPB41_ENST00000373797	70	0.114286	0.871429	0.0142857	0.131148	0.0163934	0.125	0.129032	6.77778	0.0144928
TBL1XR1	225	0.0933333	0.871111	0.0355556	0.107143	0.0408163	0.380952	0.102941	6.75862	0.0368664
CMTM3	31	0.129032	0.870968	0	0.148148	0	0	0.148148	6.75	0
GOLGA6C_ENST00000300576	93	0.129032	0.870968	0	0.148148	0	0	0.148148	6.75	0
SOX18	62	0.129032	0.870968	0	0.148148	0	0	0.148148	6.75	0
TMED7	31	0.0967742	0.870968	0.0322581	0.111111	0.037037	0.333333	0.107143	6.75	0.0333333
ZNF486	85	0.105882	0.870588	0.0235294	0.121622	0.027027	0.222222	0.118421	6.72727	0.0240964
UBP1	77	0.116883	0.87013	0.012987	0.134328	0.0149254	0.111111	0.132353	6.7	0.0131579
C19orf67	23	0.0869565	0.869565	0.0434783	0.1	0.05	0.5	0.0952381	6.66667	0.0454545
C1orf144	23	0.130435	0.869565	0	0.15	0	0	0.15	6.66667	0
C5orf64	23	0.130435	0.869565	0	0.15	0	0	0.15	6.66667	0
ENSG00000173968	23	0.130435	0.869565	0	0.15	0	0	0.15	6.66667	0
GABPB1_ENST00000220429	69	0.0724638	0.869565	0.057971	0.0833333	0.0666667	0.8	0.078125	6.66667	0.0615385
GPBP1_ENST00000454432	23	0.0434783	0.869565	0.0869565	0.05	0.1	2	0.0454545	6.66667	0.0952381
IL8	23	0.0869565	0.869565	0.0434783	0.1	0.05	0.5	0.0952381	6.66667	0.0454545
KRTAP17-1	23	0.0869565	0.869565	0.0434783	0.1	0.05	0.5	0.0952381	6.66667	0.0454545
NR5A2_ENST00000367357	23	0.0434783	0.869565	0.0869565	0.05	0.1	2	0.0454545	6.66667	0.0952381
SLC35A2_ENST00000445167	46	0.130435	0.869565	0	0.15	0	0	0.15	6.66667	0
YAP1_ENST00000282441	153	0.0915033	0.869281	0.0392157	0.105263	0.0451128	0.428571	0.100719	6.65	0.0408163
SSX5	145	0.131034	0.868966	0	0.150794	0	0	0.150794	6.63158	0
KRTAP19-5	61	0.114754	0.868852	0.0163934	0.132075	0.0188679	0.142857	0.12963	6.625	0.0166667
ZNF207	99	0.0505051	0.868687	0.0808081	0.0581395	0.0930233	1.6	0.0531915	6.61538	0.0879121
C9orf84_ENST00000374283	76	0.0921053	0.868421	0.0394737	0.106061	0.0454545	0.428571	0.101449	6.6	0.0410959
CARD17	38	0.131579	0.868421	0	0.151515	0	0	0.151515	6.6	0
CCL7	38	0.131579	0.868421	0	0.151515	0	0	0.151515	6.6	0
SNRPC	38	0.131579	0.868421	0	0.151515	0	0	0.151515	6.6	0
JAK3_ENST00000534444	243	0.0658436	0.868313	0.0658436	0.0758294	0.0758294	1	0.0704846	6.59375	0.0704846
MDM2	167	0.0958084	0.868263	0.0359281	0.110345	0.0413793	0.375	0.10596	6.59091	0.0372671
LIPM	53	0.0943396	0.867925	0.0377358	0.108696	0.0434783	0.4	0.104167	6.57143	0.0392157
MAPK9_ENST00000425491	53	0.132075	0.867925	0	0.152174	0	0	0.152174	6.57143	0
ESR1	514	0.105058	0.867704	0.0272374	0.121076	0.0313901	0.259259	0.117391	6.55882	0.028
PIAS2	136	0.110294	0.867647	0.0220588	0.127119	0.0254237	0.2	0.123967	6.55556	0.0225564
RSL1D1	113	0.106195	0.867257	0.0265487	0.122449	0.0306122	0.25	0.118812	6.53333	0.0272727
APOPT1	15	0.133333	0.866667	0	0.153846	0	0	0.153846	6.5	0
ATPIF1	15	0.133333	0.866667	0	0.153846	0	0	0.153846	6.5	0
BCAP29_ENST00000379121	30	0.1	0.866667	0.0333333	0.115385	0.0384615	0.333333	0.111111	6.5	0.0344828
C3orf14	30	0.133333	0.866667	0	0.153846	0	0	0.153846	6.5	0
C7orf69	15	0.133333	0.866667	0	0.153846	0	0	0.153846	6.5	0
CTDSP1	45	0.111111	0.866667	0.0222222	0.128205	0.025641	0.2	0.125	6.5	0.0227273
DEFB126	45	0.133333	0.866667	0	0.153846	0	0	0.153846	6.5	0
EIF4EBP2	15	0.133333	0.866667	0	0.153846	0	0	0.153846	6.5	0
ENSG00000186483	15	0.133333	0.866667	0	0.153846	0	0	0.153846	6.5	0
ENSG00000249398	30	0.1	0.866667	0.0333333	0.115385	0.0384615	0.333333	0.111111	6.5	0.0344828
FAM82A1_ENST00000406384	45	0.133333	0.866667	0	0.153846	0	0	0.153846	6.5	0
FSCN3_ENST00000265825	15	0.133333	0.866667	0	0.153846	0	0	0.153846	6.5	0
GAST	30	0.133333	0.866667	0	0.153846	0	0	0.153846	6.5	0
GINS3_ENST00000426538	30	0.133333	0.866667	0	0.153846	0	0	0.153846	6.5	0
GOLGA8G	15	0.133333	0.866667	0	0.153846	0	0	0.153846	6.5	0
GPX1	45	0.133333	0.866667	0	0.153846	0	0	0.153846	6.5	0
HCP5	15	0.0666667	0.866667	0.0666667	0.0769231	0.0769231	1	0.0714286	6.5	0.0714286
HSBP1	15	0.133333	0.866667	0	0.153846	0	0	0.153846	6.5	0
HSBP1_ENST00000433866	15	0.133333	0.866667	0	0.153846	0	0	0.153846	6.5	0
HSPB11_ENST00000371377	15	0.133333	0.866667	0	0.153846	0	0	0.153846	6.5	0
HSPE1	15	0.133333	0.866667	0	0.153846	0	0	0.153846	6.5	0
IFITM10	30	0.133333	0.866667	0	0.153846	0	0	0.153846	6.5	0
KANK1_ENST00000382289	30	0.1	0.866667	0.0333333	0.115385	0.0384615	0.333333	0.111111	6.5	0.0344828
KRTAP2-2	15	0.0666667	0.866667	0.0666667	0.0769231	0.0769231	1	0.0714286	6.5	0.0714286
MANF	30	0.1	0.866667	0.0333333	0.115385	0.0384615	0.333333	0.111111	6.5	0.0344828
MGEA5_ENST00000419011	15	0.133333	0.866667	0	0.153846	0	0	0.153846	6.5	0
Q8N0W1_HUMAN	15	0.133333	0.866667	0	0.153846	0	0	0.153846	6.5	0
RAB28_ENST00000338176	15	0.0666667	0.866667	0.0666667	0.0769231	0.0769231	1	0.0714286	6.5	0.0714286
RP11-1286E23.5	30	0.133333	0.866667	0	0.153846	0	0	0.153846	6.5	0
RPL27	30	0.133333	0.866667	0	0.153846	0	0	0.153846	6.5	0
SAMD10_ENST00000450107	15	0.133333	0.866667	0	0.153846	0	0	0.153846	6.5	0
SEC61B	15	0.133333	0.866667	0	0.153846	0	0	0.153846	6.5	0
SLC30A5_ENST00000380860	15	0.0666667	0.866667	0.0666667	0.0769231	0.0769231	1	0.0714286	6.5	0.0714286
SNN	15	0.133333	0.866667	0	0.153846	0	0	0.153846	6.5	0
SNRPC_ENST00000374017	30	0.133333	0.866667	0	0.153846	0	0	0.153846	6.5	0
TBPL1	45	0.111111	0.866667	0.0222222	0.128205	0.025641	0.2	0.125	6.5	0.0227273
TCEA2_ENST00000395053	45	0.111111	0.866667	0.0222222	0.128205	0.025641	0.2	0.125	6.5	0.0227273
TMEM167A	15	0.0666667	0.866667	0.0666667	0.0769231	0.0769231	1	0.0714286	6.5	0.0714286
TMEM236	15	0.133333	0.866667	0	0.153846	0	0	0.153846	6.5	0
TRIM5_ENST00000396853	15	0.0666667	0.866667	0.0666667	0.0769231	0.0769231	1	0.0714286	6.5	0.0714286
RECQL4	352	0.110795	0.866477	0.0227273	0.127869	0.0262295	0.205128	0.124601	6.48936	0.0232558
TRAF7	306	0.107843	0.866013	0.0261438	0.124528	0.0301887	0.242424	0.120879	6.46341	0.0268456
TCF12_ENST00000343827	97	0.0515464	0.865979	0.0824742	0.0595238	0.0952381	1.6	0.0543478	6.46154	0.0898876
RARA	216	0.125	0.865741	0.00925926	0.144385	0.0106952	0.0740741	0.142857	6.44828	0.00934579
RRAD	67	0.119403	0.865672	0.0149254	0.137931	0.0172414	0.125	0.135593	6.44444	0.0151515
SCRN3_ENST00000409673	67	0.104478	0.865672	0.0298507	0.12069	0.0344828	0.285714	0.116667	6.44444	0.0307692
C6orf103_ENST00000367488	52	0.0961538	0.865385	0.0384615	0.111111	0.0444444	0.4	0.106383	6.42857	0.04
IK	52	0.115385	0.865385	0.0192308	0.133333	0.0222222	0.166667	0.130435	6.42857	0.0196078
RP11-632K20.1	52	0.0961538	0.865385	0.0384615	0.111111	0.0444444	0.4	0.106383	6.42857	0.04
FLT3	755	0.101987	0.864901	0.0331126	0.117917	0.0382848	0.324675	0.113569	6.40196	0.0342466
BEX1	37	0.0810811	0.864865	0.0540541	0.09375	0.0625	0.666667	0.0882353	6.4	0.0571429
CEP44	74	0.108108	0.864865	0.027027	0.125	0.03125	0.25	0.121212	6.4	0.0277778
DEFB119_ENST00000376315	37	0.135135	0.864865	0	0.15625	0	0	0.15625	6.4	0
MOSPD1	37	0.0810811	0.864865	0.0540541	0.09375	0.0625	0.666667	0.0882353	6.4	0.0571429
FGFR3_ENST00000340107	599	0.130217	0.864775	0.00500835	0.150579	0.00579151	0.0384615	0.149712	6.39506	0.00503356
GATA2	303	0.10231	0.864686	0.0330033	0.118321	0.0381679	0.322581	0.113971	6.39024	0.0341297
TNNT1	96	0.125	0.864583	0.0104167	0.144578	0.0120482	0.0833333	0.142857	6.38462	0.0105263
C11orf70	59	0.0677966	0.864407	0.0677966	0.0784314	0.0784314	1	0.0727273	6.375	0.0727273
CDK2	59	0.118644	0.864407	0.0169492	0.137255	0.0196078	0.142857	0.134615	6.375	0.0172414
KIAA1704	59	0.101695	0.864407	0.0338983	0.117647	0.0392157	0.333333	0.113208	6.375	0.0350877
USP17L13	59	0.135593	0.864407	0	0.156863	0	0	0.156863	6.375	0
FGFR2	611	0.106383	0.864157	0.0294599	0.123106	0.0340909	0.276923	0.119048	6.36145	0.0303541
AGR2_ENST00000419572	22	0.136364	0.863636	0	0.157895	0	0	0.157895	6.33333	0
C16orf3	44	0.136364	0.863636	0	0.157895	0	0	0.157895	6.33333	0
C17orf72_ENST00000412177	22	0.136364	0.863636	0	0.157895	0	0	0.157895	6.33333	0
CEP128_ENST00000327841	44	0.113636	0.863636	0.0227273	0.131579	0.0263158	0.2	0.128205	6.33333	0.0232558
CUBN_ENST00000433666	22	0.136364	0.863636	0	0.157895	0	0	0.157895	6.33333	0
K0087_HUMAN	22	0.136364	0.863636	0	0.157895	0	0	0.157895	6.33333	0
LCE6A	22	0.136364	0.863636	0	0.157895	0	0	0.157895	6.33333	0
LCE6A_ENST00000431011	22	0.136364	0.863636	0	0.157895	0	0	0.157895	6.33333	0
LZIC	22	0.136364	0.863636	0	0.157895	0	0	0.157895	6.33333	0
MED18	44	0.136364	0.863636	0	0.157895	0	0	0.157895	6.33333	0
MED18_ENST00000373842	44	0.136364	0.863636	0	0.157895	0	0	0.157895	6.33333	0
NELF_ENST00000371468	22	0.136364	0.863636	0	0.157895	0	0	0.157895	6.33333	0
ORM2_ENST00000412657	22	0.0454545	0.863636	0.0909091	0.0526316	0.105263	2	0.047619	6.33333	0.1
PDCD5	22	0.0909091	0.863636	0.0454545	0.105263	0.0526316	0.5	0.1	6.33333	0.047619
PLA2G2E	44	0.0909091	0.863636	0.0454545	0.105263	0.0526316	0.5	0.1	6.33333	0.047619
SVIP	22	0.0909091	0.863636	0.0454545	0.105263	0.0526316	0.5	0.1	6.33333	0.047619
THAP3_ENST00000054650	44	0.0909091	0.863636	0.0454545	0.105263	0.0526316	0.5	0.1	6.33333	0.047619
THOC7	44	0.113636	0.863636	0.0227273	0.131579	0.0263158	0.2	0.128205	6.33333	0.0232558
EGFR_ENST00000442591	293	0.122867	0.863481	0.0136519	0.142292	0.0158103	0.111111	0.140078	6.325	0.0138408
HIST1H3B	234	0.115385	0.863248	0.0213675	0.133663	0.0247525	0.185185	0.130435	6.3125	0.0218341
HOXD1	73	0.0958904	0.863014	0.0410959	0.111111	0.047619	0.428571	0.106061	6.3	0.0428571
RCN1	73	0.136986	0.863014	0	0.15873	0	0	0.15873	6.3	0
EZH2	467	0.0792291	0.862955	0.0578158	0.0918114	0.0669975	0.72973	0.0860465	6.29688	0.0613636
YAP1	124	0.0887097	0.862903	0.0483871	0.102804	0.0560748	0.545455	0.0973451	6.29412	0.0508475
C7orf72	102	0.0980392	0.862745	0.0392157	0.113636	0.0454545	0.4	0.108696	6.28571	0.0408163
GSTM5_ENST00000369812	51	0.117647	0.862745	0.0196078	0.136364	0.0227273	0.166667	0.133333	6.28571	0.02
ACOT6	29	0.137931	0.862069	0	0.16	0	0	0.16	6.25	0
BAALC_ENST00000297574	29	0.137931	0.862069	0	0.16	0	0	0.16	6.25	0
BAD	29	0.103448	0.862069	0.0344828	0.12	0.04	0.333333	0.115385	6.25	0.0357143
CCL7_ENST00000200307	29	0.137931	0.862069	0	0.16	0	0	0.16	6.25	0
DAP	29	0.137931	0.862069	0	0.16	0	0	0.16	6.25	0
ENSG00000196993	29	0.137931	0.862069	0	0.16	0	0	0.16	6.25	0
FGFR2_ENST00000357555	435	0.103448	0.862069	0.0344828	0.12	0.04	0.333333	0.115385	6.25	0.0357143
FH	174	0.091954	0.862069	0.045977	0.106667	0.0533333	0.5	0.101266	6.25	0.0481928
GALC_ENST00000544807	29	0.103448	0.862069	0.0344828	0.12	0.04	0.333333	0.115385	6.25	0.0357143
GTF3C5_ENST00000440319	29	0.137931	0.862069	0	0.16	0	0	0.16	6.25	0
OAZ1	29	0.103448	0.862069	0.0344828	0.12	0.04	0.333333	0.115385	6.25	0.0357143
PABPC1L_ENST00000217075	29	0.137931	0.862069	0	0.16	0	0	0.16	6.25	0
PRSS48_ENST00000455694	58	0.137931	0.862069	0	0.16	0	0	0.16	6.25	0
SKAP2_ENST00000432747	29	0.103448	0.862069	0.0344828	0.12	0.04	0.333333	0.115385	6.25	0.0357143
TAF8_ENST00000372978	29	0.137931	0.862069	0	0.16	0	0	0.16	6.25	0
ZDHHC16	58	0.12069	0.862069	0.0172414	0.14	0.02	0.142857	0.137255	6.25	0.0175439
ZNF343_ENST00000358413	29	0.0689655	0.862069	0.0689655	0.08	0.08	1	0.0740741	6.25	0.0740741
FOXA1	362	0.132597	0.861878	0.00552486	0.153846	0.00641026	0.0416667	0.152866	6.24	0.00555556
KRTAP4-9_ENST00000377734	65	0.123077	0.861538	0.0153846	0.142857	0.0178571	0.125	0.140351	6.22222	0.015625
ZMYM5	65	0.107692	0.861538	0.0307692	0.125	0.0357143	0.285714	0.12069	6.22222	0.031746
STX12	36	0.111111	0.861111	0.0277778	0.129032	0.0322581	0.25	0.125	6.2	0.0285714
SYCP3	36	0.0833333	0.861111	0.0555556	0.0967742	0.0645161	0.666667	0.0909091	6.2	0.0588235
TMEM136_ENST00000314475	36	0.138889	0.861111	0	0.16129	0	0	0.16129	6.2	0
KLF1	79	0.139241	0.860759	0	0.161765	0	0	0.161765	6.18182	0
GATA1_ENST00000376665	122	0.122951	0.860656	0.0163934	0.142857	0.0190476	0.133333	0.140187	6.17647	0.0166667
ARL6IP4	43	0.116279	0.860465	0.0232558	0.135135	0.027027	0.2	0.131579	6.16667	0.0238095
CRTAM_ENST00000533709	43	0.116279	0.860465	0.0232558	0.135135	0.027027	0.2	0.131579	6.16667	0.0238095
ENSG00000255524	43	0.139535	0.860465	0	0.162162	0	0	0.162162	6.16667	0
FGFR2_ENST00000369056	430	0.104651	0.860465	0.0348837	0.121622	0.0405405	0.333333	0.116883	6.16667	0.0361446
GOLGA8J_ENST00000567927	43	0.139535	0.860465	0	0.162162	0	0	0.162162	6.16667	0
KCNIP2_ENST00000348850	43	0.139535	0.860465	0	0.162162	0	0	0.162162	6.16667	0
STXBP6	43	0.116279	0.860465	0.0232558	0.135135	0.027027	0.2	0.131579	6.16667	0.0238095
STXBP6_ENST00000358326	43	0.116279	0.860465	0.0232558	0.135135	0.027027	0.2	0.131579	6.16667	0.0238095
TOM1_ENST00000411850	43	0.139535	0.860465	0	0.162162	0	0	0.162162	6.16667	0
PSMD4	93	0.107527	0.860215	0.0322581	0.125	0.0375	0.3	0.120482	6.15385	0.0333333
MDM2_ENST00000462284	157	0.101911	0.859873	0.0382166	0.118519	0.0444444	0.375	0.113475	6.13636	0.0397351
FBXW7_ENST00000393956	449	0.00890869	0.859688	0.131403	0.0103627	0.15285	14.75	0.00898876	6.12698	0.151282
TCEAL4	64	0.09375	0.859375	0.046875	0.109091	0.0545455	0.5	0.103448	6.11111	0.0491803
MTA1_ENST00000435036	71	0.126761	0.859155	0.0140845	0.147541	0.0163934	0.111111	0.145161	6.1	0.0142857
PIK3C2G_ENST00000538779	504	0.0912698	0.859127	0.0496032	0.106236	0.0577367	0.543478	0.100437	6.09859	0.0521921
DPYD_ENST00000306031	78	0.141026	0.858974	0	0.164179	0	0	0.164179	6.09091	0
SCRN3	78	0.102564	0.858974	0.0384615	0.119403	0.0447761	0.375	0.114286	6.09091	0.04
AGFG1	92	0.108696	0.858696	0.0326087	0.126582	0.0379747	0.3	0.121951	6.07692	0.0337079
SMO	338	0.112426	0.857988	0.0295858	0.131034	0.0344828	0.263158	0.126667	6.04167	0.0304878
TROAP	190	0.115789	0.857895	0.0263158	0.134969	0.0306748	0.227273	0.130952	6.03704	0.027027
TP53_ENST00000545858	6559	0.00472633	0.857448	0.137826	0.00551209	0.16074	29.1613	0.00474877	6.01497	0.159859
APOL4_ENST00000328429	7	0.142857	0.857143	0	0.166667	0	0	0.166667	6	0
ARTN	21	0.142857	0.857143	0	0.166667	0	0	0.166667	6	0
AUH_ENST00000422391	7	0.142857	0.857143	0	0.166667	0	0	0.166667	6	0
BEX1_ENST00000372728	35	0.0857143	0.857143	0.0571429	0.1	0.0666667	0.666667	0.09375	6	0.0606061
C11orf71	21	0.0952381	0.857143	0.047619	0.111111	0.0555556	0.5	0.105263	6	0.05
C14orf1	21	0.142857	0.857143	0	0.166667	0	0	0.166667	6	0
C14orf48	14	0.142857	0.857143	0	0.166667	0	0	0.166667	6	0
C1orf185	35	0.114286	0.857143	0.0285714	0.133333	0.0333333	0.25	0.129032	6	0.0294118
C1orf185_ENST00000371759	35	0.114286	0.857143	0.0285714	0.133333	0.0333333	0.25	0.129032	6	0.0294118
C21orf67_ENST00000397841	7	0.142857	0.857143	0	0.166667	0	0	0.166667	6	0
C3orf23_ENST00000396078	7	0.142857	0.857143	0	0.166667	0	0	0.166667	6	0
C6orf25_ENST00000375810	7	0.142857	0.857143	0	0.166667	0	0	0.166667	6	0
C7orf11	35	0.0571429	0.857143	0.0857143	0.0666667	0.1	1.5	0.0606061	6	0.09375
C7orf59	14	0.142857	0.857143	0	0.166667	0	0	0.166667	6	0
CALML6	35	0.142857	0.857143	0	0.166667	0	0	0.166667	6	0
CDC42BPA_ENST00000429440	7	0.142857	0.857143	0	0.166667	0	0	0.166667	6	0
CT47A9	7	0.142857	0.857143	0	0.166667	0	0	0.166667	6	0
CYorf15B	7	0	0.857143	0.142857				0	6	0.166667
DDX11_ENST00000251758	35	0.0857143	0.857143	0.0571429	0.1	0.0666667	0.666667	0.09375	6	0.0606061
DMKN_ENST00000601650	7	0.142857	0.857143	0	0.166667	0	0	0.166667	6	0
DYNLRB1_ENST00000300469	7	0.142857	0.857143	0	0.166667	0	0	0.166667	6	0
EID2	28	0.142857	0.857143	0	0.166667	0	0	0.166667	6	0
EIF4EBP3	14	0.0714286	0.857143	0.0714286	0.0833333	0.0833333	1	0.0769231	6	0.0769231
ENSG00000135702	28	0.107143	0.857143	0.0357143	0.125	0.0416667	0.333333	0.12	6	0.037037
ENSG00000184206	7	0.142857	0.857143	0	0.166667	0	0	0.166667	6	0
ENSG00000188912	21	0.142857	0.857143	0	0.166667	0	0	0.166667	6	0
ENSG00000229377	7	0.142857	0.857143	0	0.166667	0	0	0.166667	6	0
ERH	21	0.0952381	0.857143	0.047619	0.111111	0.0555556	0.5	0.105263	6	0.05
ESD	49	0.142857	0.857143	0	0.166667	0	0	0.166667	6	0
F8A1	7	0.142857	0.857143	0	0.166667	0	0	0.166667	6	0
FAM25A	7	0.142857	0.857143	0	0.166667	0	0	0.166667	6	0
FAM72D	7	0.142857	0.857143	0	0.166667	0	0	0.166667	6	0
FKBP1A	7	0.142857	0.857143	0	0.166667	0	0	0.166667	6	0
FUCA1	63	0.126984	0.857143	0.015873	0.148148	0.0185185	0.125	0.145455	6	0.016129
GADD45A	35	0.142857	0.857143	0	0.166667	0	0	0.166667	6	0
GBAP	35	0.142857	0.857143	0	0.166667	0	0	0.166667	6	0
GOLGA1_ENST00000373551	7	0.142857	0.857143	0	0.166667	0	0	0.166667	6	0
H2AFX	28	0.142857	0.857143	0	0.166667	0	0	0.166667	6	0
HBA2	14	0.0714286	0.857143	0.0714286	0.0833333	0.0833333	1	0.0769231	6	0.0769231
HDDC2_ENST00000368377	7	0.142857	0.857143	0	0.166667	0	0	0.166667	6	0
HOXC6_ENST00000509328	14	0.0714286	0.857143	0.0714286	0.0833333	0.0833333	1	0.0769231	6	0.0769231
HOXD13	35	0.142857	0.857143	0	0.166667	0	0	0.166667	6	0
IGFBP3	63	0.126984	0.857143	0.015873	0.148148	0.0185185	0.125	0.145455	6	0.016129
KDM5D_ENST00000535647	7	0.142857	0.857143	0	0.166667	0	0	0.166667	6	0
KIR3DL1	7	0.142857	0.857143	0	0.166667	0	0	0.166667	6	0
KLF4	217	0.133641	0.857143	0.00921659	0.155914	0.0107527	0.0689655	0.154255	6	0.00930233
KRT85_ENST00000544265	21	0.142857	0.857143	0	0.166667	0	0	0.166667	6	0
LCE1D	42	0.142857	0.857143	0	0.166667	0	0	0.166667	6	0
LINC00544	7	0.142857	0.857143	0	0.166667	0	0	0.166667	6	0
LOC158957	7	0.142857	0.857143	0	0.166667	0	0	0.166667	6	0
LOC401605	7	0.142857	0.857143	0	0.166667	0	0	0.166667	6	0
LRRC3DN	7	0.142857	0.857143	0	0.166667	0	0	0.166667	6	0
LYZL4	42	0.142857	0.857143	0	0.166667	0	0	0.166667	6	0
MAPK9	91	0.120879	0.857143	0.021978	0.141026	0.025641	0.181818	0.1375	6	0.0224719
MIR497HG	7	0.142857	0.857143	0	0.166667	0	0	0.166667	6	0
MITD1	28	0.142857	0.857143	0	0.166667	0	0	0.166667	6	0
MRPS18C	28	0.107143	0.857143	0.0357143	0.125	0.0416667	0.333333	0.12	6	0.037037
MTHFD2	42	0.0952381	0.857143	0.047619	0.111111	0.0555556	0.5	0.105263	6	0.05
MTRNR2L5	7	0.142857	0.857143	0	0.166667	0	0	0.166667	6	0
NCRNA00174	14	0.142857	0.857143	0	0.166667	0	0	0.166667	6	0
NGRN_ENST00000379095	42	0.119048	0.857143	0.0238095	0.138889	0.0277778	0.2	0.135135	6	0.0243902
NLRC4	7	0	0.857143	0.142857				0	6	0.166667
NLRP12_ENST00000351894	7	0	0.857143	0.142857				0	6	0.166667
NRGN	14	0.142857	0.857143	0	0.166667	0	0	0.166667	6	0
O10D4_HUMAN	14	0.142857	0.857143	0	0.166667	0	0	0.166667	6	0
OSCP1_ENST00000354267	35	0.114286	0.857143	0.0285714	0.133333	0.0333333	0.25	0.129032	6	0.0294118
OVOL3	21	0.142857	0.857143	0	0.166667	0	0	0.166667	6	0
PET117	7	0.142857	0.857143	0	0.166667	0	0	0.166667	6	0
PET117_ENST00000432901	7	0.142857	0.857143	0	0.166667	0	0	0.166667	6	0
PLSCR3_ENST00000324822	49	0.0816327	0.857143	0.0612245	0.0952381	0.0714286	0.75	0.0888889	6	0.0652174
Q49AQ9_HUMAN	14	0.0714286	0.857143	0.0714286	0.0833333	0.0833333	1	0.0769231	6	0.0769231
Q5JX50_HUMAN	7	0.142857	0.857143	0	0.166667	0	0	0.166667	6	0
Q6ZNB5_HUMAN	7	0.142857	0.857143	0	0.166667	0	0	0.166667	6	0
Q8NA17_HUMAN	7	0.142857	0.857143	0	0.166667	0	0	0.166667	6	0
Q96MT0_HUMAN	7	0.142857	0.857143	0	0.166667	0	0	0.166667	6	0
RAB6A	42	0.119048	0.857143	0.0238095	0.138889	0.0277778	0.2	0.135135	6	0.0243902
RGS2	28	0.0714286	0.857143	0.0714286	0.0833333	0.0833333	1	0.0769231	6	0.0769231
RP11-382B18.2	35	0.142857	0.857143	0	0.166667	0	0	0.166667	6	0
RPL41_ENST00000546591	7	0.142857	0.857143	0	0.166667	0	0	0.166667	6	0
RPS13	28	0.142857	0.857143	0	0.166667	0	0	0.166667	6	0
RRAS2	49	0.122449	0.857143	0.0204082	0.142857	0.0238095	0.166667	0.139535	6	0.0208333
SCRG1	21	0.142857	0.857143	0	0.166667	0	0	0.166667	6	0
SFT2D3	7	0.142857	0.857143	0	0.166667	0	0	0.166667	6	0
SHOX_ENST00000381578	28	0.107143	0.857143	0.0357143	0.125	0.0416667	0.333333	0.12	6	0.037037
SIAH1L	7	0.142857	0.857143	0	0.166667	0	0	0.166667	6	0
SNX3	28	0.0714286	0.857143	0.0714286	0.0833333	0.0833333	1	0.0769231	6	0.0769231
SPATA2L_ENST00000335360	21	0.142857	0.857143	0	0.166667	0	0	0.166667	6	0
SPHAR	14	0	0.857143	0.142857				0	6	0.166667
SPINK14	14	0.142857	0.857143	0	0.166667	0	0	0.166667	6	0
SPRED2_ENST00000443619	14	0.142857	0.857143	0	0.166667	0	0	0.166667	6	0
SPRR2D	28	0.107143	0.857143	0.0357143	0.125	0.0416667	0.333333	0.12	6	0.037037
SPRR2G	35	0.142857	0.857143	0	0.166667	0	0	0.166667	6	0
STAG3L4	21	0.142857	0.857143	0	0.166667	0	0	0.166667	6	0
SUPT3H_ENST00000371458	21	0.0952381	0.857143	0.047619	0.111111	0.0555556	0.5	0.105263	6	0.05
TCF4_ENST00000564403	21	0.142857	0.857143	0	0.166667	0	0	0.166667	6	0
TCTEX1D1	56	0.107143	0.857143	0.0357143	0.125	0.0416667	0.333333	0.12	6	0.037037
TJP2_ENST00000377259	21	0.0952381	0.857143	0.047619	0.111111	0.0555556	0.5	0.105263	6	0.05
TMEM78	7	0	0.857143	0.142857				0	6	0.166667
TNNI3	56	0.142857	0.857143	0	0.166667	0	0	0.166667	6	0
TPPP2	42	0.142857	0.857143	0	0.166667	0	0	0.166667	6	0
TSPY3_ENST00000457222	7	0.142857	0.857143	0	0.166667	0	0	0.166667	6	0
TXNRD1_ENST00000526691	42	0.0952381	0.857143	0.047619	0.111111	0.0555556	0.5	0.105263	6	0.05
UBAP1_ENST00000543944	14	0.0714286	0.857143	0.0714286	0.0833333	0.0833333	1	0.0769231	6	0.0769231
ZFAND4	21	0.0952381	0.857143	0.047619	0.111111	0.0555556	0.5	0.105263	6	0.05
ZNF605	49	0.122449	0.857143	0.0204082	0.142857	0.0238095	0.166667	0.139535	6	0.0208333
RUNX1_ENST00000486278	167	0.0479042	0.856287	0.0958084	0.0559441	0.111888	2	0.0503145	5.95833	0.10596
FGFR2_ENST00000457416	493	0.111562	0.855984	0.0324544	0.130332	0.0379147	0.290909	0.125571	5.94366	0.033543
KLHL5_ENST00000359687	152	0.118421	0.855263	0.0263158	0.138462	0.0307692	0.222222	0.134328	5.90909	0.027027
RRAGB	76	0.118421	0.855263	0.0263158	0.138462	0.0307692	0.222222	0.134328	5.90909	0.027027
ASAH1_ENST00000314146	69	0.101449	0.855072	0.0434783	0.118644	0.0508475	0.428571	0.112903	5.9	0.0454545
GABPB1	69	0.0724638	0.855072	0.0724638	0.0847458	0.0847458	1	0.078125	5.9	0.078125
KBTBD11	69	0.144928	0.855072	0	0.169492	0	0	0.169492	5.9	0
NUCKS1	69	0.101449	0.855072	0.0434783	0.118644	0.0508475	0.428571	0.112903	5.9	0.0454545
SLC38A9_ENST00000539768	69	0.144928	0.855072	0	0.169492	0	0	0.169492	5.9	0
UFSP2	69	0.101449	0.855072	0.0434783	0.118644	0.0508475	0.428571	0.112903	5.9	0.0454545
USP16_ENST00000535828	69	0.115942	0.855072	0.0289855	0.135593	0.0338983	0.25	0.131148	5.9	0.0298507
ZBTB10_ENST00000379091	69	0.101449	0.855072	0.0434783	0.118644	0.0508475	0.428571	0.112903	5.9	0.0454545
MYD88_ENST00000417037	131	0.0992366	0.854962	0.0458015	0.116071	0.0535714	0.461538	0.110169	5.89474	0.048
FGFR2_ENST00000351936	489	0.114519	0.854806	0.0306748	0.133971	0.0358852	0.267857	0.12933	5.88732	0.0316456
IRS2	413	0.138015	0.854722	0.00726392	0.161473	0.00849858	0.0526316	0.160112	5.88333	0.00731707
C3orf71	55	0.145455	0.854545	0	0.170213	0	0	0.170213	5.875	0
CLEC7A	55	0.127273	0.854545	0.0181818	0.148936	0.0212766	0.142857	0.145833	5.875	0.0185185
HOXA4	55	0.145455	0.854545	0	0.170213	0	0	0.170213	5.875	0
SDHD	55	0.0909091	0.854545	0.0545455	0.106383	0.0638298	0.6	0.1	5.875	0.0576923
EFNA4	48	0.145833	0.854167	0	0.170732	0	0	0.170732	5.85714	0
GLTPD2	48	0.125	0.854167	0.0208333	0.146341	0.0243902	0.166667	0.142857	5.85714	0.0212766
HIBCH	48	0.125	0.854167	0.0208333	0.146341	0.0243902	0.166667	0.142857	5.85714	0.0212766
NXPE1	144	0.118056	0.854167	0.0277778	0.138211	0.0325203	0.235294	0.133858	5.85714	0.0285714
RAD51	96	0.0833333	0.854167	0.0625	0.097561	0.0731707	0.75	0.0909091	5.85714	0.0666667
RBBP7	96	0.135417	0.854167	0.0104167	0.158537	0.0121951	0.0769231	0.156627	5.85714	0.0105263
TFAM	48	0.104167	0.854167	0.0416667	0.121951	0.0487805	0.4	0.116279	5.85714	0.0434783
CHEK1	137	0.10219	0.854015	0.0437956	0.119658	0.0512821	0.428571	0.113821	5.85	0.0458015
FAM55A	137	0.116788	0.854015	0.0291971	0.136752	0.034188	0.25	0.132231	5.85	0.0300752
ERCC5_ENST00000535557	41	0.0731707	0.853659	0.0731707	0.0857143	0.0857143	1	0.0789474	5.83333	0.0789474
EZH2_ENST00000350995	410	0.0902439	0.853659	0.0560976	0.105714	0.0657143	0.621622	0.0991957	5.83333	0.0594315
OR2A4	41	0.146341	0.853659	0	0.171429	0	0	0.171429	5.83333	0
OGT	191	0.125654	0.853403	0.0209424	0.147239	0.0245399	0.166667	0.143713	5.82143	0.0213904
RIT1	109	0.0917431	0.853211	0.0550459	0.107527	0.0645161	0.6	0.10101	5.8125	0.0582524
C5orf58	34	0.117647	0.852941	0.0294118	0.137931	0.0344828	0.25	0.133333	5.8	0.030303
COPG2_ENST00000445977	34	0.117647	0.852941	0.0294118	0.137931	0.0344828	0.25	0.133333	5.8	0.030303
DNAJC15	34	0.117647	0.852941	0.0294118	0.137931	0.0344828	0.25	0.133333	5.8	0.030303
DNAJC15_ENST00000379221	34	0.117647	0.852941	0.0294118	0.137931	0.0344828	0.25	0.133333	5.8	0.030303
FBXO48	34	0.0882353	0.852941	0.0588235	0.103448	0.0689655	0.666667	0.0967742	5.8	0.0625
GINS3	34	0.147059	0.852941	0	0.172414	0	0	0.172414	5.8	0
HPRT1	34	0.0882353	0.852941	0.0588235	0.103448	0.0689655	0.666667	0.0967742	5.8	0.0625
IL23A	34	0.117647	0.852941	0.0294118	0.137931	0.0344828	0.25	0.133333	5.8	0.030303
NDUFB8	34	0.147059	0.852941	0	0.172414	0	0	0.172414	5.8	0
NQO2	34	0.0882353	0.852941	0.0588235	0.103448	0.0689655	0.666667	0.0967742	5.8	0.0625
PMPCB_ENST00000420236	34	0.0882353	0.852941	0.0588235	0.103448	0.0689655	0.666667	0.0967742	5.8	0.0625
PPIE	68	0.132353	0.852941	0.0147059	0.155172	0.0172414	0.111111	0.152542	5.8	0.0149254
PPP1R14D	34	0.147059	0.852941	0	0.172414	0	0	0.172414	5.8	0
PRSS33	34	0.147059	0.852941	0	0.172414	0	0	0.172414	5.8	0
RALB_ENST00000404963	34	0.117647	0.852941	0.0294118	0.137931	0.0344828	0.25	0.133333	5.8	0.030303
RTN4_ENST00000394609	34	0.117647	0.852941	0.0294118	0.137931	0.0344828	0.25	0.133333	5.8	0.030303
XCL1	34	0.117647	0.852941	0.0294118	0.137931	0.0344828	0.25	0.133333	5.8	0.030303
CHD1L_ENST00000369258	122	0.106557	0.852459	0.0409836	0.125	0.0480769	0.384615	0.119266	5.77778	0.042735
HNF1A_ENST00000543427	183	0.10929	0.852459	0.0382514	0.128205	0.0448718	0.35	0.122699	5.77778	0.0397727
IST1	61	0.131148	0.852459	0.0163934	0.153846	0.0192308	0.125	0.150943	5.77778	0.0166667
CDC23_ENST00000394884	27	0.148148	0.851852	0	0.173913	0	0	0.173913	5.75	0
FAM26D_ENST00000416171	27	0.148148	0.851852	0	0.173913	0	0	0.173913	5.75	0
GNG3	27	0.111111	0.851852	0.037037	0.130435	0.0434783	0.333333	0.125	5.75	0.0384615
IFI27L2	27	0.148148	0.851852	0	0.173913	0	0	0.173913	5.75	0
JOSD2	27	0.148148	0.851852	0	0.173913	0	0	0.173913	5.75	0
LDHAL6A	54	0.12963	0.851852	0.0185185	0.152174	0.0217391	0.142857	0.148936	5.75	0.0188679
PRKCI	162	0.0987654	0.851852	0.0493827	0.115942	0.057971	0.5	0.109589	5.75	0.0519481
PRSS48	54	0.148148	0.851852	0	0.173913	0	0	0.173913	5.75	0
RAD9B_ENST00000392672	54	0.0555556	0.851852	0.0925926	0.0652174	0.108696	1.66667	0.0588235	5.75	0.102041
SAT1	27	0.148148	0.851852	0	0.173913	0	0	0.173913	5.75	0
SPDYA	54	0.12963	0.851852	0.0185185	0.152174	0.0217391	0.142857	0.148936	5.75	0.0188679
WFDC2	27	0.148148	0.851852	0	0.173913	0	0	0.173913	5.75	0
ZNF691	54	0.148148	0.851852	0	0.173913	0	0	0.173913	5.75	0
POLG2	101	0.128713	0.851485	0.019802	0.151163	0.0232558	0.153846	0.147727	5.73333	0.020202
KLHL5_ENST00000381930	148	0.121622	0.851351	0.027027	0.142857	0.031746	0.222222	0.138462	5.72727	0.0277778
NAPG	74	0.0675676	0.851351	0.0810811	0.0793651	0.0952381	1.2	0.0724638	5.72727	0.0882353
MAX_ENST00000284165	114	0.0263158	0.850877	0.122807	0.0309278	0.14433	4.66667	0.027027	5.70588	0.14
NPAS3_ENST00000341321	67	0.134328	0.850746	0.0149254	0.157895	0.0175439	0.111111	0.155172	5.7	0.0151515
PPP1R42	67	0.134328	0.850746	0.0149254	0.157895	0.0175439	0.111111	0.155172	5.7	0.0151515
GNA11	288	0.135417	0.850694	0.0138889	0.159184	0.0163265	0.102564	0.156627	5.69767	0.0140845
PHLDA1	87	0.126437	0.850575	0.0229885	0.148649	0.027027	0.181818	0.144737	5.69231	0.0235294
MAX_ENST00000556979	107	0.0186916	0.850467	0.130841	0.021978	0.153846	7	0.0190476	5.6875	0.150538
PREPL	127	0.11811	0.850394	0.0314961	0.138889	0.037037	0.266667	0.133929	5.68421	0.0325203
TSHR	467	0.124197	0.850107	0.0256959	0.146096	0.0302267	0.206897	0.141809	5.67143	0.0263736
MED12_ENST00000333646	567	0.0917108	0.850088	0.0582011	0.107884	0.0684647	0.634615	0.100971	5.67059	0.0617978
AL122001_32	20	0.1	0.85	0.05	0.117647	0.0588235	0.5	0.111111	5.66667	0.0526316
APOBEC3H_ENST00000421988	40	0.15	0.85	0	0.176471	0	0	0.176471	5.66667	0
C19orf70	20	0.15	0.85	0	0.176471	0	0	0.176471	5.66667	0
C3orf57	20	0.1	0.85	0.05	0.117647	0.0588235	0.5	0.111111	5.66667	0.0526316
C4orf34	20	0.1	0.85	0.05	0.117647	0.0588235	0.5	0.111111	5.66667	0.0526316
C4orf45	40	0.075	0.85	0.075	0.0882353	0.0882353	1	0.0810811	5.66667	0.0810811
CMAHP_ENST00000424282	20	0.1	0.85	0.05	0.117647	0.0588235	0.5	0.111111	5.66667	0.0526316
DEFB112	60	0.0666667	0.85	0.0833333	0.0784314	0.0980392	1.25	0.0714286	5.66667	0.0909091
ENSG00000153081	20	0.15	0.85	0	0.176471	0	0	0.176471	5.66667	0
ENSG00000268470	20	0.15	0.85	0	0.176471	0	0	0.176471	5.66667	0
GJD3_ENST00000337376	20	0.1	0.85	0.05	0.117647	0.0588235	0.5	0.111111	5.66667	0.0526316
IFITM2	20	0.15	0.85	0	0.176471	0	0	0.176471	5.66667	0
MAFK	20	0.15	0.85	0	0.176471	0	0	0.176471	5.66667	0
MAPK1IP1L	60	0.15	0.85	0	0.176471	0	0	0.176471	5.66667	0
MCF2L2_ENST00000447025	40	0.15	0.85	0	0.176471	0	0	0.176471	5.66667	0
MGST2	20	0.15	0.85	0	0.176471	0	0	0.176471	5.66667	0
MYCBP	20	0.1	0.85	0.05	0.117647	0.0588235	0.5	0.111111	5.66667	0.0526316
NAAA_ENST00000399497	20	0.1	0.85	0.05	0.117647	0.0588235	0.5	0.111111	5.66667	0.0526316
NANP	40	0.1	0.85	0.05	0.117647	0.0588235	0.5	0.111111	5.66667	0.0526316
NTF4_ENST00000451356	20	0.15	0.85	0	0.176471	0	0	0.176471	5.66667	0
PFN1	20	0.1	0.85	0.05	0.117647	0.0588235	0.5	0.111111	5.66667	0.0526316
SDHC	40	0.15	0.85	0	0.176471	0	0	0.176471	5.66667	0
SDHC_ENST00000367975	40	0.15	0.85	0	0.176471	0	0	0.176471	5.66667	0
SLC35A2_ENST00000376529	40	0.15	0.85	0	0.176471	0	0	0.176471	5.66667	0
TNFRSF12A	20	0.15	0.85	0	0.176471	0	0	0.176471	5.66667	0
TRAFD1	100	0.12	0.85	0.03	0.141176	0.0352941	0.25	0.136364	5.66667	0.0309278
TRAPPC3_ENST00000373159	20	0.15	0.85	0	0.176471	0	0	0.176471	5.66667	0
ZSCAN30	60	0.133333	0.85	0.0166667	0.156863	0.0196078	0.125	0.153846	5.66667	0.0169492
TIMP3	73	0.136986	0.849315	0.0136986	0.16129	0.016129	0.1	0.15873	5.63636	0.0138889
TAF1	444	0.121622	0.849099	0.0292793	0.143236	0.0344828	0.240741	0.138462	5.62687	0.0301624
DLK2	53	0.150943	0.849057	0	0.177778	0	0	0.177778	5.625	0
MXD3_ENST00000423571	53	0.0943396	0.849057	0.0566038	0.111111	0.0666667	0.6	0.104167	5.625	0.06
RP13-395E19.1	53	0.150943	0.849057	0	0.177778	0	0	0.177778	5.625	0
AGFG1_ENST00000409979	86	0.116279	0.848837	0.0348837	0.136986	0.0410959	0.3	0.131579	5.61538	0.0361446
BLID	33	0.151515	0.848485	0	0.178571	0	0	0.178571	5.6	0
C1orf189	33	0.121212	0.848485	0.030303	0.142857	0.0357143	0.25	0.137931	5.6	0.03125
C3orf35	33	0.0606061	0.848485	0.0909091	0.0714286	0.107143	1.5	0.0645161	5.6	0.1
C6orf183	33	0.121212	0.848485	0.030303	0.142857	0.0357143	0.25	0.137931	5.6	0.03125
EIF3D_ENST00000432675	33	0.0606061	0.848485	0.0909091	0.0714286	0.107143	1.5	0.0645161	5.6	0.1
ENSG00000148713	33	0.151515	0.848485	0	0.178571	0	0	0.178571	5.6	0
FAM122C_ENST00000370784	33	0.121212	0.848485	0.030303	0.142857	0.0357143	0.25	0.137931	5.6	0.03125
GSTM4_ENST00000369833	33	0.0909091	0.848485	0.0606061	0.107143	0.0714286	0.666667	0.1	5.6	0.0645161
LYPLA1	33	0.030303	0.848485	0.121212	0.0357143	0.142857	4	0.03125	5.6	0.137931
MRPL40	33	0.151515	0.848485	0	0.178571	0	0	0.178571	5.6	0
NDUFAF2	33	0.0909091	0.848485	0.0606061	0.107143	0.0714286	0.666667	0.1	5.6	0.0645161
NGRN	33	0.121212	0.848485	0.030303	0.142857	0.0357143	0.25	0.137931	5.6	0.03125
C2orf29	79	0.139241	0.848101	0.0126582	0.164179	0.0149254	0.0909091	0.161765	5.58333	0.0128205
ANGPTL3	92	0.108696	0.847826	0.0434783	0.128205	0.0512821	0.4	0.121951	5.57143	0.0454545
ANKRD62	92	0.076087	0.847826	0.076087	0.0897436	0.0897436	1	0.0823529	5.57143	0.0823529
CCBL2_ENST00000260508	92	0.130435	0.847826	0.0217391	0.153846	0.025641	0.166667	0.15	5.57143	0.0222222
CCDC160	59	0.135593	0.847458	0.0169492	0.16	0.02	0.125	0.156863	5.55556	0.0172414
EGFL7	59	0.118644	0.847458	0.0338983	0.14	0.04	0.285714	0.134615	5.55556	0.0350877
NDUFS1	118	0.110169	0.847458	0.0423729	0.13	0.05	0.384615	0.12381	5.55556	0.0442478
REL	177	0.112994	0.847458	0.039548	0.133333	0.0466667	0.35	0.127389	5.55556	0.0411765
SPDYA_ENST00000334056	59	0.135593	0.847458	0.0169492	0.16	0.02	0.125	0.156863	5.55556	0.0172414
ZBED5	59	0.0677966	0.847458	0.0847458	0.08	0.1	1.25	0.0727273	5.55556	0.0925926
ZBED5_ENST00000432999	59	0.0677966	0.847458	0.0847458	0.08	0.1	1.25	0.0727273	5.55556	0.0925926
BCL2L10	72	0.125	0.847222	0.0277778	0.147541	0.0327869	0.222222	0.142857	5.54545	0.0285714
RNF32	85	0.129412	0.847059	0.0235294	0.152778	0.0277778	0.181818	0.148649	5.53846	0.0240964
IDH3B_ENST00000380851	98	0.142857	0.846939	0.0102041	0.168675	0.0120482	0.0714286	0.166667	5.53333	0.0103093
RCOR2	98	0.122449	0.846939	0.0306122	0.144578	0.0361446	0.25	0.139535	5.53333	0.0315789
APLN	13	0.153846	0.846154	0	0.181818	0	0	0.181818	5.5	0
ARL15_ENST00000504924	39	0.102564	0.846154	0.0512821	0.121212	0.0606061	0.5	0.114286	5.5	0.0540541
C12orf29	52	0.134615	0.846154	0.0192308	0.159091	0.0227273	0.142857	0.155556	5.5	0.0196078
C15orf37	13	0.153846	0.846154	0	0.181818	0	0	0.181818	5.5	0
C17orf109	13	0.153846	0.846154	0	0.181818	0	0	0.181818	5.5	0
C17orf81_ENST00000396628	52	0.134615	0.846154	0.0192308	0.159091	0.0227273	0.142857	0.155556	5.5	0.0196078
C19orf24	13	0.0769231	0.846154	0.0769231	0.0909091	0.0909091	1	0.0833333	5.5	0.0833333
C3orf35_ENST00000452017	13	0	0.846154	0.153846				0	5.5	0.181818
CCL19_ENST00000378800	13	0.153846	0.846154	0	0.181818	0	0	0.181818	5.5	0
CD99L2_ENST00000320893	13	0.153846	0.846154	0	0.181818	0	0	0.181818	5.5	0
CHCHD1_ENST00000372837	13	0.153846	0.846154	0	0.181818	0	0	0.181818	5.5	0
CRIP1	13	0.153846	0.846154	0	0.181818	0	0	0.181818	5.5	0
CWF19L1	78	0.102564	0.846154	0.0512821	0.121212	0.0606061	0.5	0.114286	5.5	0.0540541
DNAJC19	26	0.0769231	0.846154	0.0769231	0.0909091	0.0909091	1	0.0833333	5.5	0.0833333
GAGE12D	26	0.153846	0.846154	0	0.181818	0	0	0.181818	5.5	0
GOLGA8G_ENST00000416855	13	0.153846	0.846154	0	0.181818	0	0	0.181818	5.5	0
GPATCH4_ENST00000334588	26	0.153846	0.846154	0	0.181818	0	0	0.181818	5.5	0
GRP	39	0.128205	0.846154	0.025641	0.151515	0.030303	0.2	0.147059	5.5	0.0263158
HIST1H4A	13	0.153846	0.846154	0	0.181818	0	0	0.181818	5.5	0
HNMT_ENST00000329366	13	0.153846	0.846154	0	0.181818	0	0	0.181818	5.5	0
HSD17B7	52	0.153846	0.846154	0	0.181818	0	0	0.181818	5.5	0
HTATIP2_ENST00000532081	13	0.153846	0.846154	0	0.181818	0	0	0.181818	5.5	0
IAPP	39	0.128205	0.846154	0.025641	0.151515	0.030303	0.2	0.147059	5.5	0.0263158
KRTAP20-3	13	0.153846	0.846154	0	0.181818	0	0	0.181818	5.5	0
KRTAP20-3_ENST00000382826	13	0.153846	0.846154	0	0.181818	0	0	0.181818	5.5	0
MDM4_ENST00000367179	65	0.107692	0.846154	0.0461538	0.127273	0.0545455	0.428571	0.12069	5.5	0.0483871
METTL15_ENST00000379199	13	0.153846	0.846154	0	0.181818	0	0	0.181818	5.5	0
NDUFAF6_ENST00000286687	13	0.153846	0.846154	0	0.181818	0	0	0.181818	5.5	0
NIT2_ENST00000497785	13	0.153846	0.846154	0	0.181818	0	0	0.181818	5.5	0
OR51J1	39	0.128205	0.846154	0.025641	0.151515	0.030303	0.2	0.147059	5.5	0.0263158
PTGES3L	26	0.0384615	0.846154	0.115385	0.0454545	0.136364	3	0.04	5.5	0.130435
Q8NH47_HUMAN	13	0.153846	0.846154	0	0.181818	0	0	0.181818	5.5	0
Q9HAD2_HUMAN	13	0.153846	0.846154	0	0.181818	0	0	0.181818	5.5	0
REXO1L11P	13	0	0.846154	0.153846				0	5.5	0.181818
RPS27A	26	0.153846	0.846154	0	0.181818	0	0	0.181818	5.5	0
SPAG11A	13	0.0769231	0.846154	0.0769231	0.0909091	0.0909091	1	0.0833333	5.5	0.0833333
STK19_ENST00000375333	78	0.153846	0.846154	0	0.181818	0	0	0.181818	5.5	0
TPRKB	39	0.128205	0.846154	0.025641	0.151515	0.030303	0.2	0.147059	5.5	0.0263158
TAF1_ENST00000276072	415	0.127711	0.845783	0.026506	0.150997	0.031339	0.207547	0.146409	5.48438	0.0272277
OGT_ENST00000373719	188	0.132979	0.845745	0.0212766	0.157233	0.0251572	0.16	0.153374	5.48276	0.0217391
DMAP1	97	0.134021	0.845361	0.0206186	0.158537	0.0243902	0.153846	0.154762	5.46667	0.0210526
ITGBL1	194	0.128866	0.845361	0.0257732	0.152439	0.0304878	0.2	0.147929	5.46667	0.026455
BBS4	84	0.142857	0.845238	0.0119048	0.169014	0.0140845	0.0833333	0.166667	5.46154	0.0120482
KLHL5	168	0.125	0.845238	0.0297619	0.147887	0.0352113	0.238095	0.142857	5.46154	0.0306748
TMTC3	155	0.116129	0.845161	0.0387097	0.137405	0.0458015	0.333333	0.131387	5.45833	0.0402685
GOLGA6D	71	0.126761	0.84507	0.028169	0.15	0.0333333	0.222222	0.145161	5.45455	0.0289855
GPR135	71	0.140845	0.84507	0.0140845	0.166667	0.0166667	0.1	0.163934	5.45455	0.0142857
MCU	71	0.112676	0.84507	0.0422535	0.133333	0.05	0.375	0.126984	5.45455	0.0441176
IQCF3	58	0.137931	0.844828	0.0172414	0.163265	0.0204082	0.125	0.16	5.44444	0.0175439
LPGAT1	58	0.103448	0.844828	0.0517241	0.122449	0.0612245	0.5	0.115385	5.44444	0.0545455
IDH3B	103	0.135922	0.84466	0.0194175	0.16092	0.0229885	0.142857	0.157303	5.4375	0.019802
U2SURP	193	0.119171	0.84456	0.0362694	0.141104	0.0429448	0.304348	0.135294	5.43333	0.0376344
C15orf24	45	0.111111	0.844444	0.0444444	0.131579	0.0526316	0.4	0.125	5.42857	0.0465116
C19orf43	45	0.155556	0.844444	0	0.184211	0	0	0.184211	5.42857	0
GHITM	45	0.133333	0.844444	0.0222222	0.157895	0.0263158	0.166667	0.153846	5.42857	0.0227273
MINPP1_ENST00000536010	45	0.0666667	0.844444	0.0888889	0.0789474	0.105263	1.33333	0.0714286	5.42857	0.097561
RNF220_ENST00000335497	45	0.133333	0.844444	0.0222222	0.157895	0.0263158	0.166667	0.153846	5.42857	0.0227273
SLC35A2_ENST00000376515	45	0.155556	0.844444	0	0.184211	0	0	0.184211	5.42857	0
SOSTDC1	45	0.155556	0.844444	0	0.184211	0	0	0.184211	5.42857	0
THAP8	45	0.155556	0.844444	0	0.184211	0	0	0.184211	5.42857	0
VDAC2_ENST00000313132	45	0.133333	0.844444	0.0222222	0.157895	0.0263158	0.166667	0.153846	5.42857	0.0227273
IGF1_ENST00000307046	122	0.122951	0.844262	0.0327869	0.145631	0.038835	0.266667	0.140187	5.42105	0.0338983
C11orf61	77	0.142857	0.844156	0.012987	0.169231	0.0153846	0.0909091	0.166667	5.41667	0.0131579
ARL4A	32	0.15625	0.84375	0	0.185185	0	0	0.185185	5.4	0
ASF1A	32	0.125	0.84375	0.03125	0.148148	0.037037	0.25	0.142857	5.4	0.0322581
CMTM8	32	0.125	0.84375	0.03125	0.148148	0.037037	0.25	0.142857	5.4	0.0322581
CST7	32	0.125	0.84375	0.03125	0.148148	0.037037	0.25	0.142857	5.4	0.0322581
GAGE2A	32	0.125	0.84375	0.03125	0.148148	0.037037	0.25	0.142857	5.4	0.0322581
GAGE2A_ENST00000362097	32	0.125	0.84375	0.03125	0.148148	0.037037	0.25	0.142857	5.4	0.0322581
GULP1_ENST00000410051	32	0.09375	0.84375	0.0625	0.111111	0.0740741	0.666667	0.103448	5.4	0.0666667
HRSP12	32	0.125	0.84375	0.03125	0.148148	0.037037	0.25	0.142857	5.4	0.0322581
SLBP	32	0.0625	0.84375	0.09375	0.0740741	0.111111	1.5	0.0666667	5.4	0.103448
TM4SF1	32	0.15625	0.84375	0	0.185185	0	0	0.185185	5.4	0
WASH4P_ENST00000326592	32	0.15625	0.84375	0	0.185185	0	0	0.185185	5.4	0
YAE1D1	32	0.15625	0.84375	0	0.185185	0	0	0.185185	5.4	0
GNAS_ENST00000371100	742	0.132075	0.843666	0.0242588	0.15655	0.028754	0.183673	0.152174	5.39655	0.0248619
ERP29	51	0.137255	0.843137	0.0196078	0.162791	0.0232558	0.142857	0.159091	5.375	0.02
IL20RA_ENST00000367746	51	0.0784314	0.843137	0.0784314	0.0930233	0.0930233	1	0.0851064	5.375	0.0851064
METTL10	51	0.117647	0.843137	0.0392157	0.139535	0.0465116	0.333333	0.133333	5.375	0.0408163
OBFC1	51	0.0980392	0.843137	0.0588235	0.116279	0.0697674	0.6	0.108696	5.375	0.0625
OR11H1	51	0.156863	0.843137	0	0.186047	0	0	0.186047	5.375	0
POFUT1_ENST00000375730	51	0.137255	0.843137	0.0196078	0.162791	0.0232558	0.142857	0.159091	5.375	0.02
RASD1	51	0.137255	0.843137	0.0196078	0.162791	0.0232558	0.142857	0.159091	5.375	0.02
RCCD1	51	0.137255	0.843137	0.0196078	0.162791	0.0232558	0.142857	0.159091	5.375	0.02
SARNP	51	0.117647	0.843137	0.0392157	0.139535	0.0465116	0.333333	0.133333	5.375	0.0408163
ENSG00000174501	274	0.131387	0.843066	0.0255474	0.155844	0.030303	0.194444	0.151261	5.37209	0.0262172
GOLPH3	70	0.114286	0.842857	0.0428571	0.135593	0.0508475	0.375	0.129032	5.36364	0.0447761
TCF12_ENST00000452095	140	0.0785714	0.842857	0.0785714	0.0932203	0.0932203	1	0.0852713	5.36364	0.0852713
STAT5B	248	0.112903	0.842742	0.0443548	0.133971	0.0526316	0.392857	0.127273	5.35897	0.0464135
CYP27B1	89	0.146067	0.842697	0.011236	0.173333	0.0133333	0.0769231	0.171053	5.35714	0.0113636
FEM1C	89	0.134831	0.842697	0.0224719	0.16	0.0266667	0.166667	0.155844	5.35714	0.0229885
ADM2	19	0.0526316	0.842105	0.105263	0.0625	0.125	2	0.0555556	5.33333	0.117647
AP1S2	19	0.105263	0.842105	0.0526316	0.125	0.0625	0.5	0.117647	5.33333	0.0555556
ATF7_ENST00000591397	19	0.157895	0.842105	0	0.1875	0	0	0.1875	5.33333	0
C7orf55	19	0.157895	0.842105	0	0.1875	0	0	0.1875	5.33333	0
CCNJL_ENST00000505287	19	0.157895	0.842105	0	0.1875	0	0	0.1875	5.33333	0
CTSC_ENST00000529974	19	0.105263	0.842105	0.0526316	0.125	0.0625	0.5	0.117647	5.33333	0.0555556
ENSG00000180715	57	0.0877193	0.842105	0.0701754	0.104167	0.0833333	0.8	0.0961538	5.33333	0.0754717
ENSG00000232850	19	0.0526316	0.842105	0.105263	0.0625	0.125	2	0.0555556	5.33333	0.117647
GTF2H4_ENST00000453897	19	0.157895	0.842105	0	0.1875	0	0	0.1875	5.33333	0
HES4	38	0.131579	0.842105	0.0263158	0.15625	0.03125	0.2	0.151515	5.33333	0.027027
LYRM4_ENST00000500576	19	0.105263	0.842105	0.0526316	0.125	0.0625	0.5	0.117647	5.33333	0.0555556
MDM4_ENST00000507825	19	0.157895	0.842105	0	0.1875	0	0	0.1875	5.33333	0
MPHOSPH6	19	0.157895	0.842105	0	0.1875	0	0	0.1875	5.33333	0
NRK_ENST00000536164	19	0.105263	0.842105	0.0526316	0.125	0.0625	0.5	0.117647	5.33333	0.0555556
NUDT16_ENST00000537561	19	0.157895	0.842105	0	0.1875	0	0	0.1875	5.33333	0
NUPR1L	19	0.157895	0.842105	0	0.1875	0	0	0.1875	5.33333	0
OR2T35	19	0.105263	0.842105	0.0526316	0.125	0.0625	0.5	0.117647	5.33333	0.0555556
PIGL	57	0.122807	0.842105	0.0350877	0.145833	0.0416667	0.285714	0.14	5.33333	0.0363636
PRR9	19	0.105263	0.842105	0.0526316	0.125	0.0625	0.5	0.117647	5.33333	0.0555556
PYCRL_ENST00000220966	38	0.105263	0.842105	0.0526316	0.125	0.0625	0.5	0.117647	5.33333	0.0555556
RAB4B_ENST00000594800	19	0.157895	0.842105	0	0.1875	0	0	0.1875	5.33333	0
RABGAP1_ENST00000317419	19	0.105263	0.842105	0.0526316	0.125	0.0625	0.5	0.117647	5.33333	0.0555556
RORC_ENST00000356728	19	0.157895	0.842105	0	0.1875	0	0	0.1875	5.33333	0
SERHL2	38	0.131579	0.842105	0.0263158	0.15625	0.03125	0.2	0.151515	5.33333	0.027027
SLC48A1	19	0.157895	0.842105	0	0.1875	0	0	0.1875	5.33333	0
TIMM17A	38	0.0526316	0.842105	0.105263	0.0625	0.125	2	0.0555556	5.33333	0.117647
TSPY8	19	0.157895	0.842105	0	0.1875	0	0	0.1875	5.33333	0
VPS13D_ENST00000543710	19	0.157895	0.842105	0	0.1875	0	0	0.1875	5.33333	0
KEAP1	652	0.0797546	0.842025	0.0782209	0.0947177	0.0928962	0.980769	0.0866667	5.3301	0.0848586
HNRNPK	120	0.125	0.841667	0.0333333	0.148515	0.039604	0.266667	0.142857	5.31579	0.0344828
ZNF711	221	0.104072	0.841629	0.0542986	0.123656	0.0645161	0.521739	0.116162	5.31429	0.0574163
EPCAM	82	0.109756	0.841463	0.0487805	0.130435	0.057971	0.444444	0.123288	5.30769	0.0512821
TTC34	82	0.158537	0.841463	0	0.188406	0	0	0.188406	5.30769	0
ANKRD28	63	0.15873	0.84127	0	0.188679	0	0	0.188679	5.3	0
LOC349136	63	0.15873	0.84127	0	0.188679	0	0	0.188679	5.3	0
XPO1	346	0.121387	0.84104	0.0375723	0.14433	0.0446735	0.309524	0.138158	5.29091	0.039039
BCAS2	44	0.113636	0.840909	0.0454545	0.135135	0.0540541	0.4	0.128205	5.28571	0.047619
CCBL2_ENST00000370491	88	0.136364	0.840909	0.0227273	0.162162	0.027027	0.166667	0.157895	5.28571	0.0232558
MTX3_ENST00000512560	44	0.136364	0.840909	0.0227273	0.162162	0.027027	0.166667	0.157895	5.28571	0.0232558
NUTM2B	44	0.159091	0.840909	0	0.189189	0	0	0.189189	5.28571	0
PLSCR3	44	0.0909091	0.840909	0.0681818	0.108108	0.0810811	0.75	0.1	5.28571	0.0731707
PRDM5_ENST00000394435	44	0.136364	0.840909	0.0227273	0.162162	0.027027	0.166667	0.157895	5.28571	0.0232558
RAD51C	44	0.159091	0.840909	0	0.189189	0	0	0.189189	5.28571	0
RTP4	44	0.113636	0.840909	0.0454545	0.135135	0.0540541	0.4	0.128205	5.28571	0.047619
TCEANC	44	0.136364	0.840909	0.0227273	0.162162	0.027027	0.166667	0.157895	5.28571	0.0232558
TFSM1_HUMAN	44	0.136364	0.840909	0.0227273	0.162162	0.027027	0.166667	0.157895	5.28571	0.0232558
TMEM165	44	0.136364	0.840909	0.0227273	0.162162	0.027027	0.166667	0.157895	5.28571	0.0232558
TRDN_ENST00000542443	44	0.0681818	0.840909	0.0909091	0.0810811	0.108108	1.33333	0.0731707	5.28571	0.1
U2AF2	132	0.151515	0.840909	0.00757576	0.18018	0.00900901	0.05	0.178571	5.28571	0.00763359
CCNE1	138	0.108696	0.84058	0.0507246	0.12931	0.0603448	0.466667	0.121951	5.27273	0.0534351
PMPCB	69	0.130435	0.84058	0.0289855	0.155172	0.0344828	0.222222	0.15	5.27273	0.0298507
RGS3_ENST00000462403	69	0.15942	0.84058	0	0.189655	0	0	0.189655	5.27273	0
KMO	144	0.131944	0.840278	0.0277778	0.157025	0.0330579	0.210526	0.152	5.26087	0.0285714
BET3L	25	0.12	0.84	0.04	0.142857	0.047619	0.333333	0.136364	5.25	0.0416667
BET3L_ENST00000368602	25	0.12	0.84	0.04	0.142857	0.047619	0.333333	0.136364	5.25	0.0416667
C1orf144_ENST00000401088	25	0.16	0.84	0	0.190476	0	0	0.190476	5.25	0
ENSG00000268509	25	0.08	0.84	0.08	0.0952381	0.0952381	1	0.0869565	5.25	0.0869565
FAM104B	50	0.16	0.84	0	0.190476	0	0	0.190476	5.25	0
GAGE12C	25	0.16	0.84	0	0.190476	0	0	0.190476	5.25	0
HIST1H4H	50	0.16	0.84	0	0.190476	0	0	0.190476	5.25	0
LY6G5C	25	0.08	0.84	0.08	0.0952381	0.0952381	1	0.0869565	5.25	0.0869565
MCRS1_ENST00000549528	25	0.12	0.84	0.04	0.142857	0.047619	0.333333	0.136364	5.25	0.0416667
MUC19_ENST00000538912	25	0.16	0.84	0	0.190476	0	0	0.190476	5.25	0
NCRNA00188	25	0.16	0.84	0	0.190476	0	0	0.190476	5.25	0
NDUFA4	25	0.12	0.84	0.04	0.142857	0.047619	0.333333	0.136364	5.25	0.0416667
NKD2_ENST00000382730	25	0.16	0.84	0	0.190476	0	0	0.190476	5.25	0
NME6	25	0.16	0.84	0	0.190476	0	0	0.190476	5.25	0
NRL	25	0.16	0.84	0	0.190476	0	0	0.190476	5.25	0
POLR3K	25	0.12	0.84	0.04	0.142857	0.047619	0.333333	0.136364	5.25	0.0416667
RPL10AP3	25	0.16	0.84	0	0.190476	0	0	0.190476	5.25	0
SGIP1_ENST00000371039	175	0.114286	0.84	0.0457143	0.136054	0.0544218	0.4	0.129032	5.25	0.0479042
SLC31A1_ENST00000374210	25	0.16	0.84	0	0.190476	0	0	0.190476	5.25	0
SPCS2_ENST00000263672	25	0.16	0.84	0	0.190476	0	0	0.190476	5.25	0
SSX3_ENST00000376893	75	0.16	0.84	0	0.190476	0	0	0.190476	5.25	0
TMED5	25	0.16	0.84	0	0.190476	0	0	0.190476	5.25	0
TMEM170B	25	0.12	0.84	0.04	0.142857	0.047619	0.333333	0.136364	5.25	0.0416667
TP53_ENST00000455263	10059	0.011532	0.839547	0.148921	0.0137359	0.177383	12.9138	0.0116665	5.23234	0.17498
ATF5	81	0.160494	0.839506	0	0.191176	0	0	0.191176	5.23077	0
SH3YL1_ENST00000405430	81	0.123457	0.839506	0.037037	0.147059	0.0441176	0.3	0.140845	5.23077	0.0384615
ACP6_ENST00000392988	56	0.125	0.839286	0.0357143	0.148936	0.0425532	0.285714	0.142857	5.22222	0.037037
DNAJB14	56	0.0714286	0.839286	0.0892857	0.0851064	0.106383	1.25	0.0769231	5.22222	0.0980392
KLF2	56	0.142857	0.839286	0.0178571	0.170213	0.0212766	0.125	0.166667	5.22222	0.0181818
LDHA	56	0.125	0.839286	0.0357143	0.148936	0.0425532	0.285714	0.142857	5.22222	0.037037
SNUPN	56	0.107143	0.839286	0.0535714	0.12766	0.0638298	0.5	0.12	5.22222	0.0566038
ANKUB1	87	0.149425	0.83908	0.0114943	0.178082	0.0136986	0.0769231	0.175676	5.21429	0.0116279
CXXC1	174	0.132184	0.83908	0.0287356	0.157534	0.0342466	0.217391	0.152318	5.21429	0.0295858
RHOB	87	0.126437	0.83908	0.0344828	0.150685	0.0410959	0.272727	0.144737	5.21429	0.0357143
RET	1019	0.133464	0.839058	0.0274779	0.159064	0.0327485	0.205882	0.15402	5.21341	0.0282543
C3orf38	62	0.129032	0.83871	0.0322581	0.153846	0.0384615	0.25	0.148148	5.2	0.0333333
CCDC169	31	0.16129	0.83871	0	0.192308	0	0	0.192308	5.2	0
CDKL4_ENST00000378803	62	0.129032	0.83871	0.0322581	0.153846	0.0384615	0.25	0.148148	5.2	0.0333333
CHEK2_ENST00000382580	155	0.0580645	0.83871	0.103226	0.0692308	0.123077	1.77778	0.0616438	5.2	0.115108
EFCAB2	31	0.0645161	0.83871	0.0967742	0.0769231	0.115385	1.5	0.0689655	5.2	0.107143
GAGE12H	31	0.16129	0.83871	0	0.192308	0	0	0.192308	5.2	0
GPX8	31	0.16129	0.83871	0	0.192308	0	0	0.192308	5.2	0
MDM4_ENST00000367180	31	0.129032	0.83871	0.0322581	0.153846	0.0384615	0.25	0.148148	5.2	0.0333333
NUDT15	31	0.16129	0.83871	0	0.192308	0	0	0.192308	5.2	0
SAMD14	93	0.150538	0.83871	0.0107527	0.179487	0.0128205	0.0714286	0.177215	5.2	0.0108696
SKP1_ENST00000353411	31	0.129032	0.83871	0.0322581	0.153846	0.0384615	0.25	0.148148	5.2	0.0333333
SMC1A	248	0.125	0.83871	0.0362903	0.149038	0.0432692	0.290323	0.142857	5.2	0.0376569
TEX35_ENST00000258298	31	0.16129	0.83871	0	0.192308	0	0	0.192308	5.2	0
ATRN_ENST00000446916	68	0.117647	0.838235	0.0441176	0.140351	0.0526316	0.375	0.133333	5.18182	0.0461538
C2orf69	68	0.132353	0.838235	0.0294118	0.157895	0.0350877	0.222222	0.152542	5.18182	0.030303
GNE	136	0.139706	0.838235	0.0220588	0.166667	0.0263158	0.157895	0.162393	5.18182	0.0225564
H2BFM_ENST00000243297	68	0.147059	0.838235	0.0147059	0.175439	0.0175439	0.1	0.172414	5.18182	0.0149254
NT5C2	136	0.139706	0.838235	0.0220588	0.166667	0.0263158	0.157895	0.162393	5.18182	0.0225564
SH2D1A	68	0.117647	0.838235	0.0441176	0.140351	0.0526316	0.375	0.133333	5.18182	0.0461538
CHD1L	173	0.121387	0.83815	0.0404624	0.144828	0.0482759	0.333333	0.138158	5.17857	0.0421687
PARN_ENST00000437198	105	0.104762	0.838095	0.0571429	0.125	0.0681818	0.545455	0.117021	5.17647	0.0606061
POTEM_ENST00000551509	142	0.140845	0.838028	0.0211268	0.168067	0.0252101	0.15	0.163934	5.17391	0.0215827
BRIP1	395	0.106329	0.837975	0.0556962	0.126888	0.0664653	0.52381	0.11898	5.17188	0.0589812
DENND4C	253	0.142292	0.837945	0.0197628	0.169811	0.0235849	0.138889	0.165899	5.17073	0.0201613
CEP135_ENST00000422247	37	0.162162	0.837838	0	0.193548	0	0	0.193548	5.16667	0
GOSR2_ENST00000393456	37	0.135135	0.837838	0.027027	0.16129	0.0322581	0.2	0.15625	5.16667	0.0277778
MAP1LC3B	37	0.135135	0.837838	0.027027	0.16129	0.0322581	0.2	0.15625	5.16667	0.0277778
MTO1_ENST00000415954	37	0.135135	0.837838	0.027027	0.16129	0.0322581	0.2	0.15625	5.16667	0.0277778
NDUFS4	37	0.162162	0.837838	0	0.193548	0	0	0.193548	5.16667	0
PARD3_ENST00000340077	37	0.135135	0.837838	0.027027	0.16129	0.0322581	0.2	0.15625	5.16667	0.0277778
PBX2	74	0.148649	0.837838	0.0135135	0.177419	0.016129	0.0909091	0.174603	5.16667	0.0136986
TRIM48	228	0.157895	0.837719	0.00438596	0.188482	0.0052356	0.0277778	0.1875	5.16216	0.00440529
C20orf194_ENST00000453730	80	0.1375	0.8375	0.025	0.164179	0.0298507	0.181818	0.15942	5.15385	0.025641
HMBS	80	0.15	0.8375	0.0125	0.179104	0.0149254	0.0833333	0.176471	5.15385	0.0126582
TMEM184C	80	0.1375	0.8375	0.025	0.164179	0.0298507	0.181818	0.15942	5.15385	0.025641
BNIP2	43	0.116279	0.837209	0.0465116	0.138889	0.0555556	0.4	0.131579	5.14286	0.0487805
C6orf191	43	0.116279	0.837209	0.0465116	0.138889	0.0555556	0.4	0.131579	5.14286	0.0487805
C8orf48	43	0.116279	0.837209	0.0465116	0.138889	0.0555556	0.4	0.131579	5.14286	0.0487805
CCNI	43	0.139535	0.837209	0.0232558	0.166667	0.0277778	0.166667	0.162162	5.14286	0.0238095
CDC25B_ENST00000344256	43	0.139535	0.837209	0.0232558	0.166667	0.0277778	0.166667	0.162162	5.14286	0.0238095
CEP44_ENST00000457424	43	0.139535	0.837209	0.0232558	0.166667	0.0277778	0.166667	0.162162	5.14286	0.0238095
MRPL24	43	0.139535	0.837209	0.0232558	0.166667	0.0277778	0.166667	0.162162	5.14286	0.0238095
MXD4	43	0.0930233	0.837209	0.0697674	0.111111	0.0833333	0.75	0.102564	5.14286	0.075
NDUFAF3	43	0.162791	0.837209	0	0.194444	0	0	0.194444	5.14286	0
RLN2	43	0.139535	0.837209	0.0232558	0.166667	0.0277778	0.166667	0.162162	5.14286	0.0238095
RNASEH2B	43	0.116279	0.837209	0.0465116	0.138889	0.0555556	0.4	0.131579	5.14286	0.0487805
TP53_ENST00000420246	9776	0.0126841	0.837152	0.150164	0.0151515	0.179374	11.8387	0.0128471	5.1407	0.176697
DNAJB1	92	0.163043	0.836957	0	0.194805	0	0	0.194805	5.13333	0
BRIP1_ENST00000259008	386	0.108808	0.836788	0.0544041	0.130031	0.0650155	0.5	0.122093	5.12698	0.0575342
HERC6_ENST00000273960	49	0.142857	0.836735	0.0204082	0.170732	0.0243902	0.142857	0.166667	5.125	0.0208333
MSL3_ENST00000337339	98	0.132653	0.836735	0.0306122	0.158537	0.0365854	0.230769	0.152941	5.125	0.0315789
EGFR_ENST00000344576	514	0.14786	0.836576	0.0155642	0.176744	0.0186047	0.105263	0.173516	5.11905	0.0158103
MANEA	104	0.0961538	0.836538	0.0673077	0.114943	0.0804598	0.7	0.106383	5.11765	0.0721649
CASP12	55	0.163636	0.836364	0	0.195652	0	0	0.195652	5.11111	0
CCDC132_ENST00000544910	55	0.0909091	0.836364	0.0727273	0.108696	0.0869565	0.8	0.1	5.11111	0.0784314
CLDN2	55	0.145455	0.836364	0.0181818	0.173913	0.0217391	0.125	0.170213	5.11111	0.0185185
CYB5R3	55	0.163636	0.836364	0	0.195652	0	0	0.195652	5.11111	0
IQCF3_ENST00000456080	55	0.145455	0.836364	0.0181818	0.173913	0.0217391	0.125	0.170213	5.11111	0.0185185
MBP_ENST00000382582	55	0.163636	0.836364	0	0.195652	0	0	0.195652	5.11111	0
PBX1_ENST00000540246	55	0.163636	0.836364	0	0.195652	0	0	0.195652	5.11111	0
PURB	55	0.163636	0.836364	0	0.195652	0	0	0.195652	5.11111	0
ANKRD56	122	0.139344	0.836066	0.0245902	0.166667	0.0294118	0.176471	0.161905	5.1	0.0252101
DGKB_ENST00000406247	61	0.0983607	0.836066	0.0655738	0.117647	0.0784314	0.666667	0.109091	5.1	0.0701754
ENSG00000172901	61	0.131148	0.836066	0.0327869	0.156863	0.0392157	0.25	0.150943	5.1	0.0338983
PIAS2_ENST00000324794	122	0.139344	0.836066	0.0245902	0.166667	0.0294118	0.176471	0.161905	5.1	0.0252101
SGIP1_ENST00000435165	61	0.0655738	0.836066	0.0983607	0.0784314	0.117647	1.5	0.0701754	5.1	0.109091
TRIM64B	61	0.163934	0.836066	0	0.196078	0	0	0.196078	5.1	0
C9orf100_ENST00000378387	67	0.164179	0.835821	0	0.196429	0	0	0.196429	5.09091	0
GNE_ENST00000396594	134	0.141791	0.835821	0.0223881	0.169643	0.0267857	0.157895	0.165217	5.09091	0.0229008
TCEB3CL2	67	0.104478	0.835821	0.0597015	0.125	0.0714286	0.571429	0.116667	5.09091	0.0634921
MAPK1	146	0.136986	0.835616	0.0273973	0.163934	0.0327869	0.2	0.15873	5.08333	0.028169
RAD50_ENST00000265335	383	0.0861619	0.835509	0.078329	0.103125	0.09375	0.909091	0.0942857	5.07937	0.0849858
TRIM48_ENST00000417545	231	0.155844	0.835498	0.00865801	0.186528	0.0103627	0.0555556	0.184615	5.07895	0.00873362
NUP43	85	0.117647	0.835294	0.0470588	0.140845	0.056338	0.4	0.133333	5.07143	0.0493827
IFT172_ENST00000416524	91	0.142857	0.835165	0.021978	0.171053	0.0263158	0.153846	0.166667	5.06667	0.0224719
PGM3	91	0.153846	0.835165	0.010989	0.184211	0.0131579	0.0714286	0.181818	5.06667	0.0111111
RAF1	279	0.125448	0.835125	0.0394265	0.150215	0.0472103	0.314286	0.143443	5.06522	0.0410448
RAD51B_ENST00000488612	97	0.14433	0.835052	0.0206186	0.17284	0.0246914	0.142857	0.168675	5.0625	0.0210526
N4BP2L2	103	0.135922	0.834951	0.0291262	0.162791	0.0348837	0.214286	0.157303	5.05882	0.03
PARN	109	0.110092	0.834862	0.0550459	0.131868	0.0659341	0.5	0.123711	5.05556	0.0582524
SAG_ENST00000409110	109	0.137615	0.834862	0.0275229	0.164835	0.032967	0.2	0.159574	5.05556	0.0283019
TRIM23	109	0.12844	0.834862	0.0366972	0.153846	0.043956	0.285714	0.147368	5.05556	0.0380952
ZNF354B	109	0.12844	0.834862	0.0366972	0.153846	0.043956	0.285714	0.147368	5.05556	0.0380952
CDC23	115	0.156522	0.834783	0.00869565	0.1875	0.0104167	0.0555556	0.185567	5.05263	0.00877193
CHEK2	242	0.0743802	0.834711	0.0909091	0.0891089	0.108911	1.22222	0.0803571	5.05	0.1
TCF12_ENST00000438423	139	0.0791367	0.834532	0.0863309	0.0948276	0.103448	1.09091	0.0859375	5.04348	0.0944882
BCL6	308	0.133117	0.834416	0.0324675	0.159533	0.0389105	0.243902	0.153558	5.03922	0.033557
MDM4	157	0.127389	0.834395	0.0382166	0.152672	0.0458015	0.3	0.145985	5.03846	0.0397351
TP53_ENST00000413465	7555	0.0108537	0.83415	0.154997	0.0130117	0.185814	14.2805	0.0109728	5.02953	0.183427
DIS3	313	0.111821	0.833866	0.0543131	0.1341	0.0651341	0.485714	0.125899	5.01923	0.0574324
AC127391_4	36	0.138889	0.833333	0.0277778	0.166667	0.0333333	0.2	0.16129	5	0.0285714
ACER3_ENST00000544113	6	0.166667	0.833333	0	0.2	0	0	0.2	5	0
ACRV1	54	0.12963	0.833333	0.037037	0.155556	0.0444444	0.285714	0.148936	5	0.0384615
ACSS1_ENST00000376726	6	0.166667	0.833333	0	0.2	0	0	0.2	5	0
ADORA2A-AS1	6	0.166667	0.833333	0	0.2	0	0	0.2	5	0
ANKRD39	42	0.166667	0.833333	0	0.2	0	0	0.2	5	0
BBS9_ENST00000434373	6	0	0.833333	0.166667				0	5	0.2
C10orf126	18	0.166667	0.833333	0	0.2	0	0	0.2	5	0
C10orf57	12	0.166667	0.833333	0	0.2	0	0	0.2	5	0
C11orf58	42	0.119048	0.833333	0.047619	0.142857	0.0571429	0.4	0.135135	5	0.05
C11orf72	12	0.166667	0.833333	0	0.2	0	0	0.2	5	0
C14orf109	24	0.125	0.833333	0.0416667	0.15	0.05	0.333333	0.142857	5	0.0434783
C14orf129	24	0.166667	0.833333	0	0.2	0	0	0.2	5	0
C14orf147	12	0.166667	0.833333	0	0.2	0	0	0.2	5	0
C14orf159_ENST00000518665	12	0.0833333	0.833333	0.0833333	0.1	0.1	1	0.0909091	5	0.0909091
C19orf25	6	0.166667	0.833333	0	0.2	0	0	0.2	5	0
C1orf110_ENST00000367911	42	0.142857	0.833333	0.0238095	0.171429	0.0285714	0.166667	0.166667	5	0.0243902
C1orf52_ENST00000344356	30	0.166667	0.833333	0	0.2	0	0	0.2	5	0
C2orf15	24	0.0833333	0.833333	0.0833333	0.1	0.1	1	0.0909091	5	0.0909091
C4orf48	12	0.166667	0.833333	0	0.2	0	0	0.2	5	0
C5orf27	6	0.166667	0.833333	0	0.2	0	0	0.2	5	0
C5orf43	12	0.166667	0.833333	0	0.2	0	0	0.2	5	0
C6orf98	6	0.166667	0.833333	0	0.2	0	0	0.2	5	0
C7orf54	18	0.166667	0.833333	0	0.2	0	0	0.2	5	0
C9orf102_ENST00000407474	54	0.148148	0.833333	0.0185185	0.177778	0.0222222	0.125	0.173913	5	0.0188679
C9orf40	24	0.125	0.833333	0.0416667	0.15	0.05	0.333333	0.142857	5	0.0434783
C9orf53	6	0.166667	0.833333	0	0.2	0	0	0.2	5	0
CBWD3_ENST00000377344	6	0.166667	0.833333	0	0.2	0	0	0.2	5	0
CCDC7_ENST00000435402	18	0.111111	0.833333	0.0555556	0.133333	0.0666667	0.5	0.125	5	0.0588235
CCSAP	18	0.111111	0.833333	0.0555556	0.133333	0.0666667	0.5	0.125	5	0.0588235
CDC42BPA_ENST00000441725	24	0.166667	0.833333	0	0.2	0	0	0.2	5	0
CHD5	6	0.166667	0.833333	0	0.2	0	0	0.2	5	0
CLEC2A	24	0.0416667	0.833333	0.125	0.05	0.15	3	0.0434783	5	0.142857
CLEC7A_ENST00000310002	12	0.166667	0.833333	0	0.2	0	0	0.2	5	0
COQ2	66	0.166667	0.833333	0	0.2	0	0	0.2	5	0
CPSF4L	12	0.166667	0.833333	0	0.2	0	0	0.2	5	0
CXCL11	24	0.125	0.833333	0.0416667	0.15	0.05	0.333333	0.142857	5	0.0434783
CXorf28_ENST00000420429	6	0.166667	0.833333	0	0.2	0	0	0.2	5	0
CXorf31	6	0.166667	0.833333	0	0.2	0	0	0.2	5	0
DAZ3	6	0.166667	0.833333	0	0.2	0	0	0.2	5	0
DMAP1_ENST00000437511	48	0.125	0.833333	0.0416667	0.15	0.05	0.333333	0.142857	5	0.0434783
DYNLT1_ENST00000367088	6	0.166667	0.833333	0	0.2	0	0	0.2	5	0
ECHDC1	18	0.166667	0.833333	0	0.2	0	0	0.2	5	0
ENSG00000118519	6	0.166667	0.833333	0	0.2	0	0	0.2	5	0
ENSG00000198843	42	0.142857	0.833333	0.0238095	0.171429	0.0285714	0.166667	0.166667	5	0.0243902
ENSG00000212743	6	0.166667	0.833333	0	0.2	0	0	0.2	5	0
ENSG00000215029	6	0.166667	0.833333	0	0.2	0	0	0.2	5	0
ENSG00000228381	6	0.166667	0.833333	0	0.2	0	0	0.2	5	0
ENSG00000233863	12	0.0833333	0.833333	0.0833333	0.1	0.1	1	0.0909091	5	0.0909091
ENSG00000236499	6	0	0.833333	0.166667				0	5	0.2
FAM104B_ENST00000425133	48	0.145833	0.833333	0.0208333	0.175	0.025	0.142857	0.170732	5	0.0212766
FAM200B	66	0.106061	0.833333	0.0606061	0.127273	0.0727273	0.571429	0.118644	5	0.0645161
FAM200B_ENST00000422728	66	0.106061	0.833333	0.0606061	0.127273	0.0727273	0.571429	0.118644	5	0.0645161
FAM73B_ENST00000277475	6	0.166667	0.833333	0	0.2	0	0	0.2	5	0
FLJ23584	6	0.166667	0.833333	0	0.2	0	0	0.2	5	0
FLJ42957	12	0.0833333	0.833333	0.0833333	0.1	0.1	1	0.0909091	5	0.0909091
FLJ45983	6	0.166667	0.833333	0	0.2	0	0	0.2	5	0
GABRB3_ENST00000400188	12	0.0833333	0.833333	0.0833333	0.1	0.1	1	0.0909091	5	0.0909091
GAPVD1_ENST00000394104	84	0.107143	0.833333	0.0595238	0.128571	0.0714286	0.555556	0.12	5	0.0632911
GFRA1_ENST00000544592	36	0.166667	0.833333	0	0.2	0	0	0.2	5	0
GRK4_ENST00000442472	6	0.166667	0.833333	0	0.2	0	0	0.2	5	0
GTF2H5	6	0.166667	0.833333	0	0.2	0	0	0.2	5	0
HAP1_ENST00000341193	12	0.166667	0.833333	0	0.2	0	0	0.2	5	0
HSFY2	6	0.166667	0.833333	0	0.2	0	0	0.2	5	0
HSPB11	24	0.125	0.833333	0.0416667	0.15	0.05	0.333333	0.142857	5	0.0434783
HSPG2_ENST00000427897	18	0.166667	0.833333	0	0.2	0	0	0.2	5	0
IFT20	18	0.166667	0.833333	0	0.2	0	0	0.2	5	0
IFT20_ENST00000585089	18	0.166667	0.833333	0	0.2	0	0	0.2	5	0
ING2	48	0.125	0.833333	0.0416667	0.15	0.05	0.333333	0.142857	5	0.0434783
ING4	42	0.119048	0.833333	0.047619	0.142857	0.0571429	0.4	0.135135	5	0.05
INPP4B_ENST00000507861	24	0.0833333	0.833333	0.0833333	0.1	0.1	1	0.0909091	5	0.0909091
ISCU_ENST00000311893	18	0.166667	0.833333	0	0.2	0	0	0.2	5	0
KCNIP2	54	0.166667	0.833333	0	0.2	0	0	0.2	5	0
KLRG2_ENST00000393039	24	0.0833333	0.833333	0.0833333	0.1	0.1	1	0.0909091	5	0.0909091
KRTAP2-1	18	0.0555556	0.833333	0.111111	0.0666667	0.133333	2	0.0588235	5	0.125
LOC120364	18	0.166667	0.833333	0	0.2	0	0	0.2	5	0
LOC344165	12	0.0833333	0.833333	0.0833333	0.1	0.1	1	0.0909091	5	0.0909091
LOC388972	30	0.133333	0.833333	0.0333333	0.16	0.04	0.25	0.153846	5	0.0344828
LOC402418	6	0.166667	0.833333	0	0.2	0	0	0.2	5	0
LOC646871	6	0.166667	0.833333	0	0.2	0	0	0.2	5	0
LSM2	18	0.111111	0.833333	0.0555556	0.133333	0.0666667	0.5	0.125	5	0.0588235
LY6G6E_ENST00000383418	6	0.166667	0.833333	0	0.2	0	0	0.2	5	0
MAGEA2B	6	0.166667	0.833333	0	0.2	0	0	0.2	5	0
MAGED4B	6	0.166667	0.833333	0	0.2	0	0	0.2	5	0
MARK2_ENST00000543674	6	0.166667	0.833333	0	0.2	0	0	0.2	5	0
MCU_ENST00000357157	54	0.111111	0.833333	0.0555556	0.133333	0.0666667	0.5	0.125	5	0.0588235
MED28	36	0.166667	0.833333	0	0.2	0	0	0.2	5	0
MED31	30	0.133333	0.833333	0.0333333	0.16	0.04	0.25	0.153846	5	0.0344828
MPZL2	60	0.133333	0.833333	0.0333333	0.16	0.04	0.25	0.153846	5	0.0344828
MS4A4E_ENST00000398986	18	0.166667	0.833333	0	0.2	0	0	0.2	5	0
NM_024588_3	6	0.166667	0.833333	0	0.2	0	0	0.2	5	0
NPFF	18	0.111111	0.833333	0.0555556	0.133333	0.0666667	0.5	0.125	5	0.0588235
NPIPP1	18	0.166667	0.833333	0	0.2	0	0	0.2	5	0
NPIPP1_ENST00000358815	18	0.166667	0.833333	0	0.2	0	0	0.2	5	0
NPIPP1_ENST00000534799	6	0.166667	0.833333	0	0.2	0	0	0.2	5	0
NSL1_ENST00000422588	30	0.0666667	0.833333	0.1	0.08	0.12	1.5	0.0714286	5	0.111111
NT5DC1_ENST00000419791	12	0.166667	0.833333	0	0.2	0	0	0.2	5	0
OSGEPL1	48	0.0833333	0.833333	0.0833333	0.1	0.1	1	0.0909091	5	0.0909091
PCYT2_ENST00000538721	18	0.166667	0.833333	0	0.2	0	0	0.2	5	0
PEX7_ENST00000367756	18	0.166667	0.833333	0	0.2	0	0	0.2	5	0
PIP4K2A_ENST00000422321	48	0.166667	0.833333	0	0.2	0	0	0.2	5	0
PNKD_ENST00000248451	18	0.166667	0.833333	0	0.2	0	0	0.2	5	0
POLB	60	0.116667	0.833333	0.05	0.14	0.06	0.428571	0.132075	5	0.0526316
POLR2K	12	0.166667	0.833333	0	0.2	0	0	0.2	5	0
PPM1M	24	0.125	0.833333	0.0416667	0.15	0.05	0.333333	0.142857	5	0.0434783
PRKRA_ENST00000432031	30	0.1	0.833333	0.0666667	0.12	0.08	0.666667	0.111111	5	0.0714286
PSMA7_ENST00000442551	6	0.166667	0.833333	0	0.2	0	0	0.2	5	0
PSMB8	54	0.148148	0.833333	0.0185185	0.177778	0.0222222	0.125	0.173913	5	0.0188679
PSMG4_ENST00000473000	6	0.166667	0.833333	0	0.2	0	0	0.2	5	0
Q5T669_HUMAN	24	0.166667	0.833333	0	0.2	0	0	0.2	5	0
Q8IVF9_HUMAN	42	0.142857	0.833333	0.0238095	0.171429	0.0285714	0.166667	0.166667	5	0.0243902
R3HCC1	36	0.166667	0.833333	0	0.2	0	0	0.2	5	0
RAB44	18	0.166667	0.833333	0	0.2	0	0	0.2	5	0
RALGPS1_ENST00000394011	18	0.111111	0.833333	0.0555556	0.133333	0.0666667	0.5	0.125	5	0.0588235
RBMY1D_ENST00000382680	6	0.166667	0.833333	0	0.2	0	0	0.2	5	0
RBMY1F	6	0	0.833333	0.166667				0	5	0.2
RNASE11	60	0.1	0.833333	0.0666667	0.12	0.08	0.666667	0.111111	5	0.0714286
RNASE4	42	0.166667	0.833333	0	0.2	0	0	0.2	5	0
RNF181	24	0.166667	0.833333	0	0.2	0	0	0.2	5	0
RNF32_ENST00000343665	78	0.141026	0.833333	0.025641	0.169231	0.0307692	0.181818	0.164179	5	0.0263158
RORB	6	0	0.833333	0.166667				0	5	0.2
RP11-1286E23.13	72	0.152778	0.833333	0.0138889	0.183333	0.0166667	0.0909091	0.180328	5	0.0140845
RP11-144F15.1	6	0.166667	0.833333	0	0.2	0	0	0.2	5	0
RP11-144F15.1_ENST00000551505	6	0.166667	0.833333	0	0.2	0	0	0.2	5	0
RUFY1_ENST00000377001	66	0.151515	0.833333	0.0151515	0.181818	0.0181818	0.1	0.178571	5	0.0153846
SAMD13	30	0.133333	0.833333	0.0333333	0.16	0.04	0.25	0.153846	5	0.0344828
SAMD13_ENST00000370671	6	0.166667	0.833333	0	0.2	0	0	0.2	5	0
SCAP_ENST00000448217	24	0.125	0.833333	0.0416667	0.15	0.05	0.333333	0.142857	5	0.0434783
SH3YL1_ENST00000356150	78	0.128205	0.833333	0.0384615	0.153846	0.0461538	0.3	0.147059	5	0.04
SLC35A2_ENST00000376512	24	0.166667	0.833333	0	0.2	0	0	0.2	5	0
SNCG_ENST00000348795	6	0.166667	0.833333	0	0.2	0	0	0.2	5	0
SPDYE2	24	0.166667	0.833333	0	0.2	0	0	0.2	5	0
SPINK13	36	0.111111	0.833333	0.0555556	0.133333	0.0666667	0.5	0.125	5	0.0588235
ST7_ENST00000393447	48	0.166667	0.833333	0	0.2	0	0	0.2	5	0
TBATA	18	0.111111	0.833333	0.0555556	0.133333	0.0666667	0.5	0.125	5	0.0588235
TCEANC_ENST00000314720	36	0.166667	0.833333	0	0.2	0	0	0.2	5	0
TCF7L2_ENST00000542695	96	0.0729167	0.833333	0.09375	0.0875	0.1125	1.28571	0.0786517	5	0.103448
TCTN3_ENST00000371209	6	0.166667	0.833333	0	0.2	0	0	0.2	5	0
TERF2IP	66	0.136364	0.833333	0.030303	0.163636	0.0363636	0.222222	0.157895	5	0.03125
TXNRD3	66	0.166667	0.833333	0	0.2	0	0	0.2	5	0
UBE2D4	24	0.166667	0.833333	0	0.2	0	0	0.2	5	0
VPS29_ENST00000397678	18	0.111111	0.833333	0.0555556	0.133333	0.0666667	0.5	0.125	5	0.0588235
VSIG7	24	0.166667	0.833333	0	0.2	0	0	0.2	5	0
XRN1_ENST00000544157	42	0.0714286	0.833333	0.0952381	0.0857143	0.114286	1.33333	0.0769231	5	0.105263
YBX1_ENST00000436427	18	0.166667	0.833333	0	0.2	0	0	0.2	5	0
YIPF6	42	0.166667	0.833333	0	0.2	0	0	0.2	5	0
ZBTB44_ENST00000445008	42	0.119048	0.833333	0.047619	0.142857	0.0571429	0.4	0.135135	5	0.05
ZDHHC15	96	0.135417	0.833333	0.03125	0.1625	0.0375	0.230769	0.156627	5	0.0322581
ZNF185_ENST00000454925	12	0.166667	0.833333	0	0.2	0	0	0.2	5	0
ZNF24	66	0.136364	0.833333	0.030303	0.163636	0.0363636	0.222222	0.157895	5	0.03125
ZNF449_ENST00000370761	18	0.111111	0.833333	0.0555556	0.133333	0.0666667	0.5	0.125	5	0.0588235
ZNF484_ENST00000395506	60	0.116667	0.833333	0.05	0.14	0.06	0.428571	0.132075	5	0.0526316
TAF1_ENST00000449580	370	0.137838	0.832432	0.0297297	0.165584	0.0357143	0.215686	0.159875	4.96774	0.0306407
DDX17_ENST00000381633	143	0.125874	0.832168	0.041958	0.151261	0.0504202	0.333333	0.144	4.95833	0.0437956
MCMDC2	143	0.111888	0.832168	0.0559441	0.134454	0.0672269	0.5	0.125984	4.95833	0.0592593
MCMDC2_ENST00000422365	143	0.111888	0.832168	0.0559441	0.134454	0.0672269	0.5	0.125984	4.95833	0.0592593
C8orf45	137	0.0948905	0.832117	0.0729927	0.114035	0.0877193	0.769231	0.104839	4.95652	0.0787402
PHACTR2	131	0.137405	0.832061	0.0305344	0.165138	0.0366972	0.222222	0.159292	4.95455	0.0314961
USP8	238	0.121849	0.831933	0.0462185	0.146465	0.0555556	0.37931	0.138756	4.95	0.0484581
NOTCH4	785	0.119745	0.831847	0.0484076	0.143951	0.058193	0.404255	0.136035	4.94697	0.0508701
LARGE_ENST00000452586	107	0.168224	0.831776	0	0.202247	0	0	0.202247	4.94444	0
CYP39A1	101	0.118812	0.831683	0.049505	0.142857	0.0595238	0.416667	0.134831	4.94118	0.0520833
RBM25	196	0.137755	0.831633	0.0306122	0.165644	0.0368098	0.222222	0.159763	4.93939	0.0315789
SMEK1	95	0.136842	0.831579	0.0315789	0.164557	0.0379747	0.230769	0.158537	4.9375	0.0326087
UBXN7	95	0.157895	0.831579	0.0105263	0.189873	0.0126582	0.0666667	0.1875	4.9375	0.0106383
C14orf93	83	0.120482	0.831325	0.0481928	0.144928	0.057971	0.4	0.136986	4.92857	0.0506329
PRAMEF20	83	0.13253	0.831325	0.0361446	0.15942	0.0434783	0.272727	0.152778	4.92857	0.0375
BARD1	243	0.111111	0.831276	0.0576132	0.133663	0.0693069	0.518519	0.125	4.92683	0.0611354
TCF12	154	0.0779221	0.831169	0.0909091	0.09375	0.109375	1.16667	0.084507	4.92308	0.1
MPL	296	0.121622	0.831081	0.0472973	0.146341	0.0569106	0.388889	0.138462	4.92	0.0496454
SH3D21	71	0.169014	0.830986	0	0.20339	0	0	0.20339	4.91667	0
CDKN2C	65	0.0153846	0.830769	0.153846	0.0185185	0.185185	10	0.015625	4.90909	0.181818
FBXO11	195	0.138462	0.830769	0.0307692	0.166667	0.037037	0.222222	0.160714	4.90909	0.031746
GSTO2	65	0.107692	0.830769	0.0615385	0.12963	0.0740741	0.571429	0.12069	4.90909	0.0655738
KDSR	65	0.138462	0.830769	0.0307692	0.166667	0.037037	0.222222	0.160714	4.90909	0.031746
NUPL2	65	0.153846	0.830769	0.0153846	0.185185	0.0185185	0.1	0.181818	4.90909	0.015625
SNAI1	65	0.153846	0.830769	0.0153846	0.185185	0.0185185	0.1	0.181818	4.90909	0.015625
PPHLN1_ENST00000432191	124	0.129032	0.830645	0.0403226	0.15534	0.0485437	0.3125	0.148148	4.90476	0.0420168
FKBP3	59	0.101695	0.830508	0.0677966	0.122449	0.0816327	0.666667	0.113208	4.9	0.0727273
GDE1	59	0.135593	0.830508	0.0338983	0.163265	0.0408163	0.25	0.156863	4.9	0.0350877
LGALS9B	59	0.169492	0.830508	0	0.204082	0	0	0.204082	4.9	0
G3BP2	112	0.125	0.830357	0.0446429	0.150538	0.0537634	0.357143	0.142857	4.89474	0.046729
BUB3	53	0.150943	0.830189	0.0188679	0.181818	0.0227273	0.125	0.177778	4.88889	0.0192308
C11orf46	53	0.132075	0.830189	0.0377358	0.159091	0.0454545	0.285714	0.152174	4.88889	0.0392157
C11orf85	53	0.150943	0.830189	0.0188679	0.181818	0.0227273	0.125	0.177778	4.88889	0.0192308
CDKN2B	53	0.169811	0.830189	0	0.204545	0	0	0.204545	4.88889	0
CNOT7	53	0.169811	0.830189	0	0.204545	0	0	0.204545	4.88889	0
LYPLAL1	53	0.169811	0.830189	0	0.204545	0	0	0.204545	4.88889	0
PIH1D2	53	0.150943	0.830189	0.0188679	0.181818	0.0227273	0.125	0.177778	4.88889	0.0192308
POTEB_ENST00000439682	53	0.169811	0.830189	0	0.204545	0	0	0.204545	4.88889	0
PRSS3_ENST00000429677	53	0.150943	0.830189	0.0188679	0.181818	0.0227273	0.125	0.177778	4.88889	0.0192308
RWDD4	53	0.150943	0.830189	0.0188679	0.181818	0.0227273	0.125	0.177778	4.88889	0.0192308
SAG	106	0.141509	0.830189	0.0283019	0.170455	0.0340909	0.2	0.164835	4.88889	0.0291262
SMUG1	53	0.0754717	0.830189	0.0943396	0.0909091	0.113636	1.25	0.0816327	4.88889	0.104167
ULBP3	53	0.150943	0.830189	0.0188679	0.181818	0.0227273	0.125	0.177778	4.88889	0.0192308
AIDA_ENST00000541237	47	0.148936	0.829787	0.0212766	0.179487	0.025641	0.142857	0.175	4.875	0.0217391
BARD1_ENST00000260947	235	0.114894	0.829787	0.0553191	0.138462	0.0666667	0.481481	0.129808	4.875	0.0585586
BIVM_ENST00000448849	47	0.148936	0.829787	0.0212766	0.179487	0.025641	0.142857	0.175	4.875	0.0217391
IRAK1BP1	47	0.12766	0.829787	0.0425532	0.153846	0.0512821	0.333333	0.146341	4.875	0.0444444
KRTAP9-3	47	0.148936	0.829787	0.0212766	0.179487	0.025641	0.142857	0.175	4.875	0.0217391
PCYT1B	94	0.148936	0.829787	0.0212766	0.179487	0.025641	0.142857	0.175	4.875	0.0217391
SLC4A10_ENST00000272716	94	0.159574	0.829787	0.0106383	0.192308	0.0128205	0.0666667	0.189873	4.875	0.0107527
UBE2I	47	0.170213	0.829787	0	0.205128	0	0	0.205128	4.875	0
WDR82_ENST00000296490	47	0.148936	0.829787	0.0212766	0.179487	0.025641	0.142857	0.175	4.875	0.0217391
WWOX	47	0.106383	0.829787	0.0638298	0.128205	0.0769231	0.6	0.119048	4.875	0.0681818
ENPP4	135	0.140741	0.82963	0.0296296	0.169643	0.0357143	0.210526	0.163793	4.86957	0.0305344
RAF1_ENST00000442415	270	0.12963	0.82963	0.0407407	0.15625	0.0491071	0.314286	0.148936	4.86957	0.042471
EPS15_ENST00000396122	88	0.113636	0.829545	0.0568182	0.136986	0.0684932	0.5	0.128205	4.86667	0.060241
ETV1	264	0.117424	0.829545	0.0530303	0.141553	0.0639269	0.451613	0.133047	4.86667	0.056
RNF19A	176	0.147727	0.829545	0.0227273	0.178082	0.0273973	0.153846	0.173333	4.86667	0.0232558
ALG6_ENST00000263440	41	0.146341	0.829268	0.0243902	0.176471	0.0294118	0.166667	0.171429	4.85714	0.025
ETF1	82	0.146341	0.829268	0.0243902	0.176471	0.0294118	0.166667	0.171429	4.85714	0.025
FAM115C	41	0.170732	0.829268	0	0.205882	0	0	0.205882	4.85714	0
GOLGA8H	41	0.170732	0.829268	0	0.205882	0	0	0.205882	4.85714	0
MAPK11	82	0.121951	0.829268	0.0487805	0.147059	0.0588235	0.4	0.138889	4.85714	0.0512821
TBC1D26_ENST00000579428	41	0.146341	0.829268	0.0243902	0.176471	0.0294118	0.166667	0.171429	4.85714	0.025
DICER1	808	0.111386	0.829208	0.0594059	0.134328	0.0716418	0.533333	0.125348	4.85507	0.0631579
NTRK2_ENST00000304053	228	0.140351	0.828947	0.0307018	0.169312	0.037037	0.21875	0.163265	4.84615	0.0316742
RALB	76	0.157895	0.828947	0.0131579	0.190476	0.015873	0.0833333	0.1875	4.84615	0.0133333
ZFP37_ENST00000553380	152	0.138158	0.828947	0.0328947	0.166667	0.0396825	0.238095	0.160305	4.84615	0.0340136
GTF2E1	111	0.144144	0.828829	0.027027	0.173913	0.0326087	0.1875	0.168421	4.84211	0.0277778
HNRNPA2B1	111	0.0990991	0.828829	0.0720721	0.119565	0.0869565	0.727273	0.11	4.84211	0.0776699
HNRNPA2B1_ENST00000354667	111	0.0990991	0.828829	0.0720721	0.119565	0.0869565	0.727273	0.11	4.84211	0.0776699
TGFBR2_ENST00000359013	397	0.0629723	0.828715	0.108312	0.0759878	0.130699	1.72	0.0672043	4.83824	0.121469
CSF2	35	0.171429	0.828571	0	0.206897	0	0	0.206897	4.83333	0
DNAJC9	35	0.171429	0.828571	0	0.206897	0	0	0.206897	4.83333	0
GDF11	70	0.142857	0.828571	0.0285714	0.172414	0.0344828	0.2	0.166667	4.83333	0.0294118
LCE2A	35	0.142857	0.828571	0.0285714	0.172414	0.0344828	0.2	0.166667	4.83333	0.0294118
MRPL55	35	0.0857143	0.828571	0.0857143	0.103448	0.103448	1	0.09375	4.83333	0.09375
NOL3_ENST00000432069	35	0.114286	0.828571	0.0571429	0.137931	0.0689655	0.5	0.129032	4.83333	0.0606061
RNF185	35	0.142857	0.828571	0.0285714	0.172414	0.0344828	0.2	0.166667	4.83333	0.0294118
RNF24_ENST00000545616	35	0.142857	0.828571	0.0285714	0.172414	0.0344828	0.2	0.166667	4.83333	0.0294118
RPA2_ENST00000373909	35	0.0857143	0.828571	0.0857143	0.103448	0.103448	1	0.09375	4.83333	0.09375
TCEB1	35	0.114286	0.828571	0.0571429	0.137931	0.0689655	0.5	0.129032	4.83333	0.0606061
TEX9	70	0.0857143	0.828571	0.0857143	0.103448	0.103448	1	0.09375	4.83333	0.09375
TPK1	70	0.128571	0.828571	0.0428571	0.155172	0.0517241	0.333333	0.147541	4.83333	0.0447761
TXNDC8	35	0.142857	0.828571	0.0285714	0.172414	0.0344828	0.2	0.166667	4.83333	0.0294118
ZSCAN16	35	0.114286	0.828571	0.0571429	0.137931	0.0689655	0.5	0.129032	4.83333	0.0606061
RCOR3	99	0.141414	0.828283	0.030303	0.170732	0.0365854	0.214286	0.164706	4.82353	0.03125
ARHGAP40	64	0.171875	0.828125	0	0.207547	0	0	0.207547	4.81818	0
HSD11B1L	64	0.171875	0.828125	0	0.207547	0	0	0.207547	4.81818	0
ZNF711_ENST00000373165	221	0.117647	0.828054	0.0542986	0.142077	0.0655738	0.461538	0.133333	4.81579	0.0574163
CCDC35	122	0.147541	0.827869	0.0245902	0.178218	0.029703	0.166667	0.173077	4.80952	0.0252101
ARHGEF7_ENST00000544132	29	0.103448	0.827586	0.0689655	0.125	0.0833333	0.666667	0.115385	4.8	0.0740741
ARL5A	29	0.172414	0.827586	0	0.208333	0	0	0.208333	4.8	0
AUP1	87	0.16092	0.827586	0.0114943	0.194444	0.0138889	0.0714286	0.191781	4.8	0.0116279
C10orf125	29	0.137931	0.827586	0.0344828	0.166667	0.0416667	0.25	0.16	4.8	0.0357143
C12orf60	58	0.137931	0.827586	0.0344828	0.166667	0.0416667	0.25	0.16	4.8	0.0357143
C16orf45_ENST00000452191	29	0.172414	0.827586	0	0.208333	0	0	0.208333	4.8	0
C4orf40	87	0.149425	0.827586	0.0229885	0.180556	0.0277778	0.153846	0.175676	4.8	0.0235294
CAPZB_ENST00000433834	29	0.103448	0.827586	0.0689655	0.125	0.0833333	0.666667	0.115385	4.8	0.0740741
EIF4EBP1	29	0.172414	0.827586	0	0.208333	0	0	0.208333	4.8	0
FAM26D	29	0.172414	0.827586	0	0.208333	0	0	0.208333	4.8	0
FAM26D_ENST00000368597	29	0.172414	0.827586	0	0.208333	0	0	0.208333	4.8	0
FKBP2	29	0.103448	0.827586	0.0689655	0.125	0.0833333	0.666667	0.115385	4.8	0.0740741
H2AFZ	29	0.172414	0.827586	0	0.208333	0	0	0.208333	4.8	0
HAUS3	87	0.0689655	0.827586	0.103448	0.0833333	0.125	1.5	0.0740741	4.8	0.115385
MFN2_ENST00000376337	87	0.16092	0.827586	0.0114943	0.194444	0.0138889	0.0714286	0.191781	4.8	0.0116279
PPTC7	58	0.0862069	0.827586	0.0862069	0.104167	0.104167	1	0.0943396	4.8	0.0943396
SLC25A27_ENST00000452689	29	0.103448	0.827586	0.0689655	0.125	0.0833333	0.666667	0.115385	4.8	0.0740741
SOX4	87	0.16092	0.827586	0.0114943	0.194444	0.0138889	0.0714286	0.191781	4.8	0.0116279
SREK1IP1	29	0.103448	0.827586	0.0689655	0.125	0.0833333	0.666667	0.115385	4.8	0.0740741
TBRG1	29	0.103448	0.827586	0.0689655	0.125	0.0833333	0.666667	0.115385	4.8	0.0740741
TP53INP2	29	0.172414	0.827586	0	0.208333	0	0	0.208333	4.8	0
UTP15	87	0.16092	0.827586	0.0114943	0.194444	0.0138889	0.0714286	0.191781	4.8	0.0116279
CDKAL1	110	0.154545	0.827273	0.0181818	0.186813	0.021978	0.117647	0.182796	4.78947	0.0185185
CCDC79	81	0.123457	0.82716	0.0493827	0.149254	0.0597015	0.4	0.140845	4.78571	0.0519481
MIER1_ENST00000357692	81	0.148148	0.82716	0.0246914	0.179104	0.0298507	0.166667	0.173913	4.78571	0.0253165
ZNF398_ENST00000540950	81	0.160494	0.82716	0.0123457	0.19403	0.0149254	0.0769231	0.191176	4.78571	0.0125
SLC14A1_ENST00000436407	133	0.142857	0.827068	0.0300752	0.172727	0.0363636	0.210526	0.166667	4.78261	0.0310078
BRIX1	52	0.134615	0.826923	0.0384615	0.162791	0.0465116	0.285714	0.155556	4.77778	0.04
CAPNS2	52	0.173077	0.826923	0	0.209302	0	0	0.209302	4.77778	0
MED6	52	0.0769231	0.826923	0.0961538	0.0930233	0.116279	1.25	0.0833333	4.77778	0.106383
PIK3R3	156	0.0705128	0.826923	0.102564	0.0852713	0.124031	1.45455	0.0758621	4.77778	0.114286
TAF11	52	0.153846	0.826923	0.0192308	0.186047	0.0232558	0.125	0.181818	4.77778	0.0196078
ZNF705A	52	0.153846	0.826923	0.0192308	0.186047	0.0232558	0.125	0.181818	4.77778	0.0196078
NTRK2_ENST00000395882	179	0.145251	0.826816	0.027933	0.175676	0.0337838	0.192308	0.169935	4.77419	0.0287356
PKN2	173	0.104046	0.82659	0.0693642	0.125874	0.0839161	0.666667	0.116129	4.76667	0.0745342
AXL	467	0.149893	0.826552	0.0235546	0.181347	0.0284974	0.157143	0.176322	4.76543	0.0241228
CDKL3_ENST00000265334	98	0.142857	0.826531	0.0306122	0.17284	0.037037	0.214286	0.166667	4.76471	0.0315789
AFP	121	0.14876	0.826446	0.0247934	0.18	0.03	0.166667	0.174757	4.7619	0.0254237
KPNA5	121	0.132231	0.826446	0.0413223	0.16	0.05	0.3125	0.152381	4.7619	0.0431034
RIOK3	121	0.165289	0.826446	0.00826446	0.2	0.01	0.05	0.19802	4.7619	0.00833333
VWC2L	121	0.140496	0.826446	0.0330579	0.17	0.04	0.235294	0.163462	4.7619	0.034188
APOC1	23	0.173913	0.826087	0	0.210526	0	0	0.210526	4.75	0
ARHGAP11A	138	0.115942	0.826087	0.057971	0.140351	0.0701754	0.5	0.131148	4.75	0.0615385
C17orf72	23	0.173913	0.826087	0	0.210526	0	0	0.210526	4.75	0
C17orf72_ENST00000425164	23	0.173913	0.826087	0	0.210526	0	0	0.210526	4.75	0
C20orf24_ENST00000342422	23	0.0869565	0.826087	0.0869565	0.105263	0.105263	1	0.0952381	4.75	0.0952381
C4orf32	23	0.0869565	0.826087	0.0869565	0.105263	0.105263	1	0.0952381	4.75	0.0952381
CFH_ENST00000439155	23	0.130435	0.826087	0.0434783	0.157895	0.0526316	0.333333	0.15	4.75	0.0454545
CHCHD2P9	23	0.173913	0.826087	0	0.210526	0	0	0.210526	4.75	0
CNFN	23	0.130435	0.826087	0.0434783	0.157895	0.0526316	0.333333	0.15	4.75	0.0454545
KLRF2	23	0.130435	0.826087	0.0434783	0.157895	0.0526316	0.333333	0.15	4.75	0.0454545
LAMTOR1	23	0.173913	0.826087	0	0.210526	0	0	0.210526	4.75	0
MOBP	23	0.173913	0.826087	0	0.210526	0	0	0.210526	4.75	0
MRPL12	46	0.152174	0.826087	0.0217391	0.184211	0.0263158	0.142857	0.179487	4.75	0.0222222
ODF3B	23	0.130435	0.826087	0.0434783	0.157895	0.0526316	0.333333	0.15	4.75	0.0454545
PCYT1B_ENST00000379145	92	0.152174	0.826087	0.0217391	0.184211	0.0263158	0.142857	0.179487	4.75	0.0222222
PRPS1_ENST00000372419	23	0.173913	0.826087	0	0.210526	0	0	0.210526	4.75	0
PTPLAD2	46	0.130435	0.826087	0.0434783	0.157895	0.0526316	0.333333	0.15	4.75	0.0454545
RAB19	69	0.173913	0.826087	0	0.210526	0	0	0.210526	4.75	0
RAB5C	69	0.130435	0.826087	0.0434783	0.157895	0.0526316	0.333333	0.15	4.75	0.0454545
RAD51D	69	0.130435	0.826087	0.0434783	0.157895	0.0526316	0.333333	0.15	4.75	0.0454545
RFESD	23	0.130435	0.826087	0.0434783	0.157895	0.0526316	0.333333	0.15	4.75	0.0454545
RMND1	69	0.144928	0.826087	0.0289855	0.175439	0.0350877	0.2	0.169492	4.75	0.0298507
TFF3	23	0.173913	0.826087	0	0.210526	0	0	0.210526	4.75	0
UTP23_ENST00000357148	23	0.130435	0.826087	0.0434783	0.157895	0.0526316	0.333333	0.15	4.75	0.0454545
VSTM5	23	0.0869565	0.826087	0.0869565	0.105263	0.105263	1	0.0952381	4.75	0.0952381
VSTM5_ENST00000409977	23	0.0869565	0.826087	0.0869565	0.105263	0.105263	1	0.0952381	4.75	0.0952381
VTCN1_ENST00000359008	69	0.144928	0.826087	0.0289855	0.175439	0.0350877	0.2	0.169492	4.75	0.0298507
TXNRD1_ENST00000525566	109	0.12844	0.825688	0.0458716	0.155556	0.0555556	0.357143	0.147368	4.73684	0.0480769
MRS2	86	0.116279	0.825581	0.0581395	0.140845	0.0704225	0.5	0.131579	4.73333	0.0617284
PDZD3	86	0.139535	0.825581	0.0348837	0.169014	0.0422535	0.25	0.162162	4.73333	0.0361446
SSX3	86	0.174419	0.825581	0	0.211268	0	0	0.211268	4.73333	0
UHMK1_ENST00000489294	86	0.127907	0.825581	0.0465116	0.15493	0.056338	0.363636	0.146667	4.73333	0.0487805
ZFP2	149	0.120805	0.825503	0.0536913	0.146341	0.0650407	0.444444	0.137405	4.73077	0.0567376
CECR1_ENST00000330232	63	0.111111	0.825397	0.0634921	0.134615	0.0769231	0.571429	0.125	4.72727	0.0677966
DEFB125	63	0.111111	0.825397	0.0634921	0.134615	0.0769231	0.571429	0.125	4.72727	0.0677966
DNAJA2	63	0.142857	0.825397	0.031746	0.173077	0.0384615	0.222222	0.166667	4.72727	0.0327869
NONO	126	0.103175	0.825397	0.0714286	0.125	0.0865385	0.692308	0.115044	4.72727	0.0769231
OSBPL9_ENST00000530544	63	0.15873	0.825397	0.015873	0.192308	0.0192308	0.1	0.188679	4.72727	0.016129
ADAM10	143	0.153846	0.825175	0.020979	0.186441	0.0254237	0.136364	0.181818	4.72	0.0214286
BTNL3	143	0.167832	0.825175	0.00699301	0.20339	0.00847458	0.0416667	0.201681	4.72	0.00704225
KLK15	143	0.167832	0.825175	0.00699301	0.20339	0.00847458	0.0416667	0.201681	4.72	0.00704225
AKD1	80	0.125	0.825	0.05	0.151515	0.0606061	0.4	0.142857	4.71429	0.0526316
AKD1_ENST00000341338	80	0.1375	0.825	0.0375	0.166667	0.0454545	0.272727	0.15942	4.71429	0.038961
AKNA_ENST00000374075	40	0.125	0.825	0.05	0.151515	0.0606061	0.4	0.142857	4.71429	0.0526316
CTAGE8	40	0.15	0.825	0.025	0.181818	0.030303	0.166667	0.176471	4.71429	0.025641
EYA3	80	0.1375	0.825	0.0375	0.166667	0.0454545	0.272727	0.15942	4.71429	0.038961
HIST1H4D	80	0.1625	0.825	0.0125	0.19697	0.0151515	0.0769231	0.19403	4.71429	0.0126582
HRCT1	40	0.175	0.825	0	0.212121	0	0	0.212121	4.71429	0
IL1RAP_ENST00000422485	40	0.1	0.825	0.075	0.121212	0.0909091	0.75	0.111111	4.71429	0.0810811
KLHL7	120	0.125	0.825	0.05	0.151515	0.0606061	0.4	0.142857	4.71429	0.0526316
PIP5KL1_ENST00000388747	80	0.175	0.825	0	0.212121	0	0	0.212121	4.71429	0
PITPNA_ENST00000539476	40	0.175	0.825	0	0.212121	0	0	0.212121	4.71429	0
PTPRU_ENST00000323874	120	0.175	0.825	0	0.212121	0	0	0.212121	4.71429	0
SUFU	160	0.1375	0.825	0.0375	0.166667	0.0454545	0.272727	0.15942	4.71429	0.038961
TMEM200B	40	0.125	0.825	0.05	0.151515	0.0606061	0.4	0.142857	4.71429	0.0526316
TRIM40_ENST00000396581	40	0.15	0.825	0.025	0.181818	0.030303	0.166667	0.176471	4.71429	0.025641
CPSF6	137	0.124088	0.824818	0.0510949	0.150442	0.0619469	0.411765	0.141667	4.70833	0.0538462
CPSF6_ENST00000435070	137	0.124088	0.824818	0.0510949	0.150442	0.0619469	0.411765	0.141667	4.70833	0.0538462
RIOK2_ENST00000508447	97	0.123711	0.824742	0.0515464	0.15	0.0625	0.416667	0.141176	4.70588	0.0543478
PIK3C2G	713	0.12202	0.824684	0.0532959	0.147959	0.0646259	0.436782	0.138978	4.704	0.0562963
MYC	308	0.159091	0.824675	0.0162338	0.192913	0.019685	0.102041	0.189189	4.7037	0.0165017
CCNA2	57	0.175439	0.824561	0	0.212766	0	0	0.212766	4.7	0
ELOVL1	57	0.157895	0.824561	0.0175439	0.191489	0.0212766	0.111111	0.1875	4.7	0.0178571
GAPDH	57	0.157895	0.824561	0.0175439	0.191489	0.0212766	0.111111	0.1875	4.7	0.0178571
PDC	57	0.157895	0.824561	0.0175439	0.191489	0.0212766	0.111111	0.1875	4.7	0.0178571
SLC39A2	57	0.175439	0.824561	0	0.212766	0	0	0.212766	4.7	0
THYN1	57	0.157895	0.824561	0.0175439	0.191489	0.0212766	0.111111	0.1875	4.7	0.0178571
GALNTL5	131	0.129771	0.824427	0.0458015	0.157407	0.0555556	0.352941	0.149123	4.69565	0.048
KDM5A	541	0.101664	0.824399	0.0739372	0.123318	0.0896861	0.727273	0.113169	4.69474	0.0798403
KDM5A_ENST00000399788	541	0.101664	0.824399	0.0739372	0.123318	0.0896861	0.727273	0.113169	4.69474	0.0798403
CSDA	74	0.162162	0.824324	0.0135135	0.196721	0.0163934	0.0833333	0.193548	4.69231	0.0136986
MGAT4C_ENST00000393205	222	0.148649	0.824324	0.027027	0.180328	0.0327869	0.181818	0.174603	4.69231	0.0277778
TRAM1	74	0.162162	0.824324	0.0135135	0.196721	0.0163934	0.0833333	0.193548	4.69231	0.0136986
SRSF2_ENST00000359995	91	0.142857	0.824176	0.032967	0.173333	0.04	0.230769	0.166667	4.6875	0.0340909
THOC1	91	0.142857	0.824176	0.032967	0.173333	0.04	0.230769	0.166667	4.6875	0.0340909
MTOR	1126	0.133215	0.824156	0.0426288	0.161638	0.0517241	0.32	0.153689	4.68687	0.0445269
NTRK2_ENST00000376214	381	0.131234	0.824147	0.0446194	0.159236	0.0541401	0.34	0.151057	4.68657	0.0467033
SUZ12	199	0.0753769	0.824121	0.100503	0.0914634	0.121951	1.33333	0.0815217	4.68571	0.111732
MYC_ENST00000377970	324	0.160494	0.824074	0.0154321	0.194757	0.0187266	0.0961538	0.191176	4.68421	0.015674
PLEKHS1	108	0.138889	0.824074	0.037037	0.168539	0.0449438	0.266667	0.16129	4.68421	0.0384615
STAM2	108	0.12963	0.824074	0.0462963	0.157303	0.0561798	0.357143	0.148936	4.68421	0.0485437
RAD50	341	0.0909091	0.824047	0.085044	0.11032	0.103203	0.935484	0.1	4.68333	0.0929487
MCMDC2_ENST00000313616	125	0.12	0.824	0.056	0.145631	0.0679612	0.466667	0.136364	4.68182	0.059322
NTRK2	392	0.132653	0.82398	0.0433673	0.160991	0.0526316	0.326923	0.152941	4.68116	0.0453333
SOX2	142	0.147887	0.823944	0.028169	0.179487	0.034188	0.190476	0.173554	4.68	0.0289855
CFHR3	159	0.119497	0.823899	0.0566038	0.145038	0.0687023	0.473684	0.135714	4.67857	0.06
DDX17	159	0.132075	0.823899	0.0440252	0.160305	0.0534351	0.333333	0.152174	4.67857	0.0460526
GNAQ	295	0.125424	0.823729	0.0508475	0.152263	0.0617284	0.405405	0.143411	4.67308	0.0535714
PIK3C2G_ENST00000433979	703	0.119488	0.823613	0.056899	0.145078	0.0690846	0.47619	0.135703	4.66935	0.0603318
AC073343.1_ENST00000399484	17	0.117647	0.823529	0.0588235	0.142857	0.0714286	0.5	0.133333	4.66667	0.0625
AGTPBP1_ENST00000376109	119	0.0840336	0.823529	0.092437	0.102041	0.112245	1.1	0.0917431	4.66667	0.101852
AL445989.1	17	0.176471	0.823529	0	0.214286	0	0	0.214286	4.66667	0
AL445989.1_ENST00000453638	17	0.176471	0.823529	0	0.214286	0	0	0.214286	4.66667	0
AP4S1_ENST00000542754	17	0.117647	0.823529	0.0588235	0.142857	0.0714286	0.5	0.133333	4.66667	0.0625
C16orf58	85	0.152941	0.823529	0.0235294	0.185714	0.0285714	0.153846	0.180556	4.66667	0.0240964
C17orf64_ENST00000269127	51	0.137255	0.823529	0.0392157	0.166667	0.047619	0.285714	0.159091	4.66667	0.0408163
C17orf82	34	0.0882353	0.823529	0.0882353	0.107143	0.107143	1	0.0967742	4.66667	0.0967742
C17orf82_ENST00000335108	34	0.0882353	0.823529	0.0882353	0.107143	0.107143	1	0.0967742	4.66667	0.0967742
C9orf6	34	0.147059	0.823529	0.0294118	0.178571	0.0357143	0.2	0.172414	4.66667	0.030303
COMMD10	51	0.137255	0.823529	0.0392157	0.166667	0.047619	0.285714	0.159091	4.66667	0.0408163
CPLX4	51	0.117647	0.823529	0.0588235	0.142857	0.0714286	0.5	0.133333	4.66667	0.0625
CXorf59_ENST00000449698	17	0.117647	0.823529	0.0588235	0.142857	0.0714286	0.5	0.133333	4.66667	0.0625
DUSP19	51	0.156863	0.823529	0.0196078	0.190476	0.0238095	0.125	0.186047	4.66667	0.02
ENSG00000230873	17	0.117647	0.823529	0.0588235	0.142857	0.0714286	0.5	0.133333	4.66667	0.0625
FAM195A	17	0.176471	0.823529	0	0.214286	0	0	0.214286	4.66667	0
FBXO4_ENST00000296812	51	0.0980392	0.823529	0.0784314	0.119048	0.0952381	0.8	0.108696	4.66667	0.0851064
FCGR1B	17	0.117647	0.823529	0.0588235	0.142857	0.0714286	0.5	0.133333	4.66667	0.0625
FGF11	34	0.176471	0.823529	0	0.214286	0	0	0.214286	4.66667	0
GDPD5_ENST00000443276	17	0.176471	0.823529	0	0.214286	0	0	0.214286	4.66667	0
GPSM3	34	0.147059	0.823529	0.0294118	0.178571	0.0357143	0.2	0.172414	4.66667	0.030303
MAP6D1	17	0.117647	0.823529	0.0588235	0.142857	0.0714286	0.5	0.133333	4.66667	0.0625
MLST8_ENST00000301725	34	0.176471	0.823529	0	0.214286	0	0	0.214286	4.66667	0
MS4A13	51	0.0588235	0.823529	0.117647	0.0714286	0.142857	2	0.0625	4.66667	0.133333
MSANTD2	85	0.152941	0.823529	0.0235294	0.185714	0.0285714	0.153846	0.180556	4.66667	0.0240964
NCBP2	34	0.147059	0.823529	0.0294118	0.178571	0.0357143	0.2	0.172414	4.66667	0.030303
NDUFA5	17	0.0588235	0.823529	0.117647	0.0714286	0.142857	2	0.0625	4.66667	0.133333
NEDD8	17	0.0588235	0.823529	0.117647	0.0714286	0.142857	2	0.0625	4.66667	0.133333
NXT2	34	0.147059	0.823529	0.0294118	0.178571	0.0357143	0.2	0.172414	4.66667	0.030303
O5AK3_HUMAN	17	0.176471	0.823529	0	0.214286	0	0	0.214286	4.66667	0
OTUD3	68	0.161765	0.823529	0.0147059	0.196429	0.0178571	0.0909091	0.192982	4.66667	0.0149254
PODNL1	85	0.164706	0.823529	0.0117647	0.2	0.0142857	0.0714286	0.197183	4.66667	0.0119048
POLR2L	17	0.176471	0.823529	0	0.214286	0	0	0.214286	4.66667	0
POM121L7	17	0.176471	0.823529	0	0.214286	0	0	0.214286	4.66667	0
PSME1_ENST00000382708	34	0.147059	0.823529	0.0294118	0.178571	0.0357143	0.2	0.172414	4.66667	0.030303
Q9P0C7_HUMAN	17	0.176471	0.823529	0	0.214286	0	0	0.214286	4.66667	0
RFC3	51	0.156863	0.823529	0.0196078	0.190476	0.0238095	0.125	0.186047	4.66667	0.02
RNF32_ENST00000311822	68	0.147059	0.823529	0.0294118	0.178571	0.0357143	0.2	0.172414	4.66667	0.030303
RNF4_ENST00000511600	17	0.176471	0.823529	0	0.214286	0	0	0.214286	4.66667	0
RRAGA	51	0.156863	0.823529	0.0196078	0.190476	0.0238095	0.125	0.186047	4.66667	0.02
SH3YL1	68	0.132353	0.823529	0.0441176	0.160714	0.0535714	0.333333	0.152542	4.66667	0.0461538
SKAP2	85	0.141176	0.823529	0.0352941	0.171429	0.0428571	0.25	0.164384	4.66667	0.0365854
SLC25A36	68	0.147059	0.823529	0.0294118	0.178571	0.0357143	0.2	0.172414	4.66667	0.030303
TATDN3	51	0.137255	0.823529	0.0392157	0.166667	0.047619	0.285714	0.159091	4.66667	0.0408163
TCEA1	17	0.176471	0.823529	0	0.214286	0	0	0.214286	4.66667	0
THAP10	34	0.176471	0.823529	0	0.214286	0	0	0.214286	4.66667	0
TLE1_ENST00000418319	51	0.156863	0.823529	0.0196078	0.190476	0.0238095	0.125	0.186047	4.66667	0.02
TMEM123	34	0.147059	0.823529	0.0294118	0.178571	0.0357143	0.2	0.172414	4.66667	0.030303
TMEM167B	17	0.117647	0.823529	0.0588235	0.142857	0.0714286	0.5	0.133333	4.66667	0.0625
TXNRD1_ENST00000427956	68	0.117647	0.823529	0.0588235	0.142857	0.0714286	0.5	0.133333	4.66667	0.0625
UQCRB	34	0.117647	0.823529	0.0588235	0.142857	0.0714286	0.5	0.133333	4.66667	0.0625
VDAC2	51	0.137255	0.823529	0.0392157	0.166667	0.047619	0.285714	0.159091	4.66667	0.0408163
XAGE3	34	0.147059	0.823529	0.0294118	0.178571	0.0357143	0.2	0.172414	4.66667	0.030303
XRCC6	119	0.151261	0.823529	0.0252101	0.183673	0.0306122	0.166667	0.178218	4.66667	0.0258621
ZNF330	51	0.117647	0.823529	0.0588235	0.142857	0.0714286	0.5	0.133333	4.66667	0.0625
HDX	181	0.132597	0.823204	0.0441989	0.161074	0.0536913	0.333333	0.152866	4.65625	0.0462428
FGF3	147	0.14966	0.823129	0.0272109	0.181818	0.0330579	0.181818	0.176	4.65385	0.027972
NAA35	113	0.106195	0.823009	0.0707965	0.129032	0.0860215	0.666667	0.118812	4.65	0.0761905
TRDN	226	0.0884956	0.823009	0.0884956	0.107527	0.107527	1	0.0970874	4.65	0.0970874
YES1	175	0.0971429	0.822857	0.08	0.118056	0.0972222	0.823529	0.107595	4.64516	0.0869565
DCTN2_ENST00000543672	79	0.164557	0.822785	0.0126582	0.2	0.0153846	0.0769231	0.19697	4.64286	0.0128205
DDX3X	282	0.0992908	0.822695	0.0780142	0.12069	0.0948276	0.785714	0.110236	4.64	0.0846154
AKAP13_ENST00000426424	62	0.16129	0.822581	0.016129	0.196078	0.0196078	0.1	0.192308	4.63636	0.0163934
PSPC1	124	0.112903	0.822581	0.0645161	0.137255	0.0784314	0.571429	0.127273	4.63636	0.0689655
RHBDL1_ENST00000352681	62	0.177419	0.822581	0	0.215686	0	0	0.215686	4.63636	0
STARD6	62	0.112903	0.822581	0.0645161	0.137255	0.0784314	0.571429	0.127273	4.63636	0.0689655
TMEM171	62	0.177419	0.822581	0	0.215686	0	0	0.215686	4.63636	0
MED12_ENST00000374080	839	0.121573	0.822408	0.0560191	0.147826	0.0681159	0.460784	0.138399	4.63087	0.0593434
BTG3_ENST00000339775	45	0.133333	0.822222	0.0444444	0.162162	0.0540541	0.333333	0.153846	4.625	0.0465116
C20orf196	45	0.177778	0.822222	0	0.216216	0	0	0.216216	4.625	0
C4orf43	45	0.133333	0.822222	0.0444444	0.162162	0.0540541	0.333333	0.153846	4.625	0.0465116
DCTN2	90	0.166667	0.822222	0.0111111	0.202703	0.0135135	0.0666667	0.2	4.625	0.011236
DDIT3_ENST00000551116	45	0.155556	0.822222	0.0222222	0.189189	0.027027	0.142857	0.184211	4.625	0.0227273
ENSG00000185864_ENST00000357370	45	0.133333	0.822222	0.0444444	0.162162	0.0540541	0.333333	0.153846	4.625	0.0465116
KIAA1328_ENST00000586135	45	0.155556	0.822222	0.0222222	0.189189	0.027027	0.142857	0.184211	4.625	0.0227273
MS4A12	90	0.166667	0.822222	0.0111111	0.202703	0.0135135	0.0666667	0.2	4.625	0.011236
STK38L	90	0.133333	0.822222	0.0444444	0.162162	0.0540541	0.333333	0.153846	4.625	0.0465116
TRDMT1	90	0.133333	0.822222	0.0444444	0.162162	0.0540541	0.333333	0.153846	4.625	0.0465116
TSPAN6	45	0.155556	0.822222	0.0222222	0.189189	0.027027	0.142857	0.184211	4.625	0.0227273
SUPT16H	208	0.139423	0.822115	0.0384615	0.169591	0.0467836	0.275862	0.162011	4.62162	0.04
MMP13	163	0.165644	0.822086	0.0122699	0.201493	0.0149254	0.0740741	0.198529	4.62069	0.0124224
ALK	1096	0.141423	0.82208	0.0364964	0.172031	0.0443951	0.258065	0.164718	4.62051	0.0378788
TMEM161B	118	0.152542	0.822034	0.0254237	0.185567	0.0309278	0.166667	0.18	4.61905	0.026087
PLCG1	500	0.15	0.822	0.028	0.182482	0.0340633	0.186667	0.176471	4.61798	0.0288066
LDHB	73	0.150685	0.821918	0.0273973	0.183333	0.0333333	0.181818	0.177419	4.61538	0.028169
ERLEC1	101	0.158416	0.821782	0.019802	0.192771	0.0240964	0.125	0.188235	4.61111	0.020202
MAPK9_ENST00000452135	101	0.148515	0.821782	0.029703	0.180723	0.0361446	0.2	0.174419	4.61111	0.0306122
TJAP1_ENST00000372445	101	0.168317	0.821782	0.00990099	0.204819	0.0120482	0.0588235	0.202381	4.61111	0.01
NBN	230	0.108696	0.821739	0.0695652	0.132275	0.0846561	0.64	0.121951	4.60976	0.0747664
CENPI	157	0.165605	0.821656	0.0127389	0.20155	0.0155039	0.0769231	0.198473	4.60714	0.0129032
PIK3CB	353	0.113314	0.82153	0.0651558	0.137931	0.0793103	0.575	0.127796	4.60317	0.069697
ARHGEF35	28	0.142857	0.821429	0.0357143	0.173913	0.0434783	0.25	0.166667	4.6	0.037037
BUB3_ENST00000368865	56	0.160714	0.821429	0.0178571	0.195652	0.0217391	0.111111	0.191489	4.6	0.0181818
C1orf147	28	0.178571	0.821429	0	0.217391	0	0	0.217391	4.6	0
C20orf80	28	0.178571	0.821429	0	0.217391	0	0	0.217391	4.6	0
C9orf57	28	0.142857	0.821429	0.0357143	0.173913	0.0434783	0.25	0.166667	4.6	0.037037
C9orf57_ENST00000377024	28	0.142857	0.821429	0.0357143	0.173913	0.0434783	0.25	0.166667	4.6	0.037037
CETN3	28	0.142857	0.821429	0.0357143	0.173913	0.0434783	0.25	0.166667	4.6	0.037037
DBT_ENST00000370131	56	0.142857	0.821429	0.0357143	0.173913	0.0434783	0.25	0.166667	4.6	0.037037
EIF5AL1	28	0.178571	0.821429	0	0.217391	0	0	0.217391	4.6	0
EIF5AL1_ENST00000520547	28	0.178571	0.821429	0	0.217391	0	0	0.217391	4.6	0
ENSG00000255738	28	0.178571	0.821429	0	0.217391	0	0	0.217391	4.6	0
EXOC1	196	0.117347	0.821429	0.0612245	0.142857	0.0745342	0.521739	0.132948	4.6	0.0652174
FAM219A_ENST00000379084	28	0.178571	0.821429	0	0.217391	0	0	0.217391	4.6	0
FRG1B	28	0.178571	0.821429	0	0.217391	0	0	0.217391	4.6	0
GCNT7	28	0.142857	0.821429	0.0357143	0.173913	0.0434783	0.25	0.166667	4.6	0.037037
GCNT7_ENST00000243913	28	0.142857	0.821429	0.0357143	0.173913	0.0434783	0.25	0.166667	4.6	0.037037
HN1	28	0.107143	0.821429	0.0714286	0.130435	0.0869565	0.666667	0.12	4.6	0.0769231
KIAA0895_ENST00000415803	28	0.0714286	0.821429	0.107143	0.0869565	0.130435	1.5	0.0769231	4.6	0.12
KRTAP4-9	56	0.125	0.821429	0.0535714	0.152174	0.0652174	0.428571	0.142857	4.6	0.0566038
MAX	140	0.0571429	0.821429	0.121429	0.0695652	0.147826	2.125	0.0606061	4.6	0.138211
NT5C2_ENST00000423468	84	0.166667	0.821429	0.0119048	0.202899	0.0144928	0.0714286	0.2	4.6	0.0120482
SDF2	28	0.142857	0.821429	0.0357143	0.173913	0.0434783	0.25	0.166667	4.6	0.037037
SDR39U1_ENST00000399390	28	0.107143	0.821429	0.0714286	0.130435	0.0869565	0.666667	0.12	4.6	0.0769231
TCTEX1D2	28	0.178571	0.821429	0	0.217391	0	0	0.217391	4.6	0
TJAP1	112	0.169643	0.821429	0.00892857	0.206522	0.0108696	0.0526316	0.204301	4.6	0.00900901
TMSB4X	28	0.0714286	0.821429	0.107143	0.0869565	0.130435	1.5	0.0769231	4.6	0.12
YAF2_ENST00000442791	28	0.178571	0.821429	0	0.217391	0	0	0.217391	4.6	0
ZG16	28	0.178571	0.821429	0	0.217391	0	0	0.217391	4.6	0
ZG16_ENST00000400752	28	0.178571	0.821429	0	0.217391	0	0	0.217391	4.6	0
ZNF268_ENST00000416488	28	0.142857	0.821429	0.0357143	0.173913	0.0434783	0.25	0.166667	4.6	0.037037
ZNF626_ENST00000392298	341	0.134897	0.821114	0.0439883	0.164286	0.0535714	0.326087	0.155932	4.59016	0.0460123
HIST1H3I	95	0.157895	0.821053	0.0210526	0.192308	0.025641	0.133333	0.1875	4.58824	0.0215054
MAPK9_ENST00000455781	95	0.147368	0.821053	0.0315789	0.179487	0.0384615	0.214286	0.17284	4.58824	0.0326087
TRMT1L	95	0.157895	0.821053	0.0210526	0.192308	0.025641	0.133333	0.1875	4.58824	0.0215054
TSGA14	95	0.168421	0.821053	0.0105263	0.205128	0.0128205	0.0625	0.202532	4.58824	0.0106383
BSG_ENST00000346916	67	0.164179	0.820896	0.0149254	0.2	0.0181818	0.0909091	0.196429	4.58333	0.0151515
HMX1	67	0.104478	0.820896	0.0746269	0.127273	0.0909091	0.714286	0.116667	4.58333	0.0806452
HNRNPA1L2	67	0.179104	0.820896	0	0.218182	0	0	0.218182	4.58333	0
INPP1	67	0.179104	0.820896	0	0.218182	0	0	0.218182	4.58333	0
RNASEH2A	67	0.149254	0.820896	0.0298507	0.181818	0.0363636	0.2	0.175439	4.58333	0.0307692
RRM2B	67	0.134328	0.820896	0.0447761	0.163636	0.0545455	0.333333	0.155172	4.58333	0.046875
FANCC_ENST00000289081	173	0.138728	0.820809	0.0404624	0.169014	0.0492958	0.291667	0.161074	4.58065	0.0421687
HOMEZ_ENST00000357460	106	0.141509	0.820755	0.0377358	0.172414	0.045977	0.266667	0.164835	4.57895	0.0392157
RAD51B_ENST00000487270	106	0.141509	0.820755	0.0377358	0.172414	0.045977	0.266667	0.164835	4.57895	0.0392157
PDS5A	251	0.139442	0.820717	0.0398406	0.169903	0.0485437	0.285714	0.162037	4.57778	0.0414938
BICC1_ENST00000263103	145	0.137931	0.82069	0.0413793	0.168067	0.0504202	0.3	0.16	4.57692	0.0431655
PITRM1_ENST00000451104	184	0.157609	0.820652	0.0217391	0.192053	0.0264901	0.137931	0.187097	4.57576	0.0222222
AGR2	39	0.179487	0.820513	0	0.21875	0	0	0.21875	4.57143	0
ANKRD62_ENST00000586406	39	0.128205	0.820513	0.0512821	0.15625	0.0625	0.4	0.147059	4.57143	0.0540541
BOLL	78	0.179487	0.820513	0	0.21875	0	0	0.21875	4.57143	0
C12orf69	39	0.153846	0.820513	0.025641	0.1875	0.03125	0.166667	0.181818	4.57143	0.0263158
CBR4	39	0.153846	0.820513	0.025641	0.1875	0.03125	0.166667	0.181818	4.57143	0.0263158
CCNB1IP1	78	0.0897436	0.820513	0.0897436	0.109375	0.109375	1	0.0985915	4.57143	0.0985915
CIB1	39	0.179487	0.820513	0	0.21875	0	0	0.21875	4.57143	0
DUSP15	39	0.102564	0.820513	0.0769231	0.125	0.09375	0.75	0.114286	4.57143	0.0833333
ENSG00000171841	39	0.153846	0.820513	0.025641	0.1875	0.03125	0.166667	0.181818	4.57143	0.0263158
HSPB1	39	0.179487	0.820513	0	0.21875	0	0	0.21875	4.57143	0
PAFAH1B3	39	0.102564	0.820513	0.0769231	0.125	0.09375	0.75	0.114286	4.57143	0.0833333
PRDX3	39	0.179487	0.820513	0	0.21875	0	0	0.21875	4.57143	0
PTAR1	39	0.128205	0.820513	0.0512821	0.15625	0.0625	0.4	0.147059	4.57143	0.0540541
TK1	39	0.153846	0.820513	0.025641	0.1875	0.03125	0.166667	0.181818	4.57143	0.0263158
TK1_ENST00000301634	39	0.153846	0.820513	0.025641	0.1875	0.03125	0.166667	0.181818	4.57143	0.0263158
UPP1	78	0.179487	0.820513	0	0.21875	0	0	0.21875	4.57143	0
MAP9	167	0.143713	0.820359	0.0359281	0.175182	0.0437956	0.25	0.167832	4.56667	0.0372671
TBX3	462	0.116883	0.820346	0.0627706	0.14248	0.0765172	0.537037	0.132353	4.56627	0.0669746
ETV6	306	0.114379	0.820261	0.0653595	0.139442	0.0796813	0.571429	0.129151	4.56364	0.0699301
CASD1	178	0.157303	0.820225	0.0224719	0.191781	0.0273973	0.142857	0.186667	4.5625	0.0229885
IFT74	89	0.101124	0.820225	0.0786517	0.123288	0.0958904	0.777778	0.1125	4.5625	0.0853659
MAGEB3	139	0.165468	0.820144	0.0143885	0.201754	0.0175439	0.0869565	0.198276	4.56	0.0145985
POLE	984	0.140244	0.820122	0.0396341	0.171004	0.0483271	0.282609	0.163121	4.55932	0.0412698
THOC2	328	0.146341	0.820122	0.0335366	0.178439	0.0408922	0.229167	0.171429	4.55932	0.0347003
TP53	12532	0.0110118	0.820061	0.168928	0.013428	0.205994	15.3406	0.0111344	4.55743	0.203265
ABLIM1_ENST00000392952	100	0.13	0.82	0.05	0.158537	0.0609756	0.384615	0.149425	4.55556	0.0526316
C1orf88	50	0.12	0.82	0.06	0.146341	0.0731707	0.5	0.136364	4.55556	0.0638298
ENSG00000226232	50	0.18	0.82	0	0.219512	0	0	0.219512	4.55556	0
IDH3B_ENST00000435594	50	0.18	0.82	0	0.219512	0	0	0.219512	4.55556	0
LOC133308	100	0.13	0.82	0.05	0.158537	0.0609756	0.384615	0.149425	4.55556	0.0526316
NDUFS1_ENST00000455934	50	0.18	0.82	0	0.219512	0	0	0.219512	4.55556	0
NHEDC2	100	0.13	0.82	0.05	0.158537	0.0609756	0.384615	0.149425	4.55556	0.0526316
POMGNT1_ENST00000535522	50	0.14	0.82	0.04	0.170732	0.0487805	0.285714	0.162791	4.55556	0.0416667
TMEM127	50	0.14	0.82	0.04	0.170732	0.0487805	0.285714	0.162791	4.55556	0.0416667
AGAP6	111	0.117117	0.81982	0.0630631	0.142857	0.0769231	0.538462	0.132653	4.55	0.0673077
RIPK2	111	0.135135	0.81982	0.045045	0.164835	0.0549451	0.333333	0.15625	4.55	0.0471698
KLF14	61	0.163934	0.819672	0.0163934	0.2	0.02	0.1	0.196078	4.54545	0.0166667
RNF114	61	0.163934	0.819672	0.0163934	0.2	0.02	0.1	0.196078	4.54545	0.0166667
SLC14A1	122	0.147541	0.819672	0.0327869	0.18	0.04	0.222222	0.173077	4.54545	0.0338983
WNK1_ENST00000340908	61	0.180328	0.819672	0	0.22	0	0	0.22	4.54545	0
PDE4D_ENST00000502484	133	0.135338	0.819549	0.0451128	0.165138	0.0550459	0.333333	0.156522	4.54167	0.0472441
ERCC5	349	0.143266	0.819484	0.0372493	0.174825	0.0454545	0.26	0.167224	4.53968	0.0386905
ATP5C1	72	0.138889	0.819444	0.0416667	0.169492	0.0508475	0.3	0.16129	4.53846	0.0434783
DZANK1_ENST00000329494	144	0.138889	0.819444	0.0416667	0.169492	0.0508475	0.3	0.16129	4.53846	0.0434783
SLC25A32	72	0.138889	0.819444	0.0416667	0.169492	0.0508475	0.3	0.16129	4.53846	0.0434783
SUV39H2_ENST00000354919	72	0.138889	0.819444	0.0416667	0.169492	0.0508475	0.3	0.16129	4.53846	0.0434783
ACCN5	155	0.16129	0.819355	0.0193548	0.19685	0.023622	0.12	0.192308	4.53571	0.0197368
ANKMY2	83	0.144578	0.819277	0.0361446	0.176471	0.0441176	0.25	0.169014	4.53333	0.0375
CUL2_ENST00000537177	83	0.108434	0.819277	0.0722892	0.132353	0.0882353	0.666667	0.121622	4.53333	0.0779221
DCP2	83	0.144578	0.819277	0.0361446	0.176471	0.0441176	0.25	0.169014	4.53333	0.0375
DHRS9	83	0.156627	0.819277	0.0240964	0.191176	0.0294118	0.153846	0.185714	4.53333	0.0246914
OBSL1_ENST00000265317	83	0.156627	0.819277	0.0240964	0.191176	0.0294118	0.153846	0.185714	4.53333	0.0246914
WASF2	83	0.156627	0.819277	0.0240964	0.191176	0.0294118	0.153846	0.185714	4.53333	0.0246914
LUZP4	116	0.0948276	0.818966	0.0862069	0.115789	0.105263	0.909091	0.104762	4.52381	0.0943396
NOX5_ENST00000388866	138	0.152174	0.818841	0.0289855	0.185841	0.0353982	0.190476	0.179487	4.52	0.0298507
CCND2	149	0.14094	0.818792	0.0402685	0.172131	0.0491803	0.285714	0.164062	4.51852	0.041958
FRYL_ENST00000537810	193	0.139896	0.818653	0.0414508	0.170886	0.0506329	0.296296	0.162651	4.51429	0.0432432
RICTOR_ENST00000296782	501	0.11976	0.818363	0.0618762	0.146341	0.0756098	0.516667	0.136054	4.50549	0.0659574
DNMT3A	842	0.103325	0.81829	0.0783848	0.12627	0.095791	0.758621	0.115232	4.50327	0.0850515
ADAL	44	0.159091	0.818182	0.0227273	0.194444	0.0277778	0.142857	0.189189	4.5	0.0232558
ADAT2_ENST00000367593	11	0.181818	0.818182	0	0.222222	0	0	0.222222	4.5	0
AEBP2_ENST00000360995	11	0.181818	0.818182	0	0.222222	0	0	0.222222	4.5	0
APOC2	22	0.181818	0.818182	0	0.222222	0	0	0.222222	4.5	0
ASCC3_ENST00000369143	22	0.181818	0.818182	0	0.222222	0	0	0.222222	4.5	0
ATG16L1_ENST00000334050	55	0.0909091	0.818182	0.0909091	0.111111	0.111111	1	0.1	4.5	0.1
ATP5J2	22	0.0909091	0.818182	0.0909091	0.111111	0.111111	1	0.1	4.5	0.1
BIRC2	110	0.145455	0.818182	0.0363636	0.177778	0.0444444	0.25	0.170213	4.5	0.0377358
BTG3	44	0.113636	0.818182	0.0681818	0.138889	0.0833333	0.6	0.128205	4.5	0.0731707
C16orf47	11	0	0.818182	0.181818				0	4.5	0.222222
C16orf47_ENST00000358463	11	0	0.818182	0.181818				0	4.5	0.222222
C16orf58_ENST00000430477	44	0.159091	0.818182	0.0227273	0.194444	0.0277778	0.142857	0.189189	4.5	0.0232558
C17orf49_ENST00000547302	11	0.181818	0.818182	0	0.222222	0	0	0.222222	4.5	0
C17orf58_ENST00000449250	11	0.181818	0.818182	0	0.222222	0	0	0.222222	4.5	0
C17orf89	11	0.181818	0.818182	0	0.222222	0	0	0.222222	4.5	0
C21orf9	11	0.181818	0.818182	0	0.222222	0	0	0.222222	4.5	0
C9orf100	33	0.181818	0.818182	0	0.222222	0	0	0.222222	4.5	0
CCNE2	66	0.151515	0.818182	0.030303	0.185185	0.037037	0.2	0.178571	4.5	0.03125
CDC42EP5	22	0.181818	0.818182	0	0.222222	0	0	0.222222	4.5	0
CISD2	11	0.181818	0.818182	0	0.222222	0	0	0.222222	4.5	0
CLDN20	44	0.181818	0.818182	0	0.222222	0	0	0.222222	4.5	0
CXCL3	22	0.136364	0.818182	0.0454545	0.166667	0.0555556	0.333333	0.157895	4.5	0.047619
DAOA	55	0.127273	0.818182	0.0545455	0.155556	0.0666667	0.428571	0.145833	4.5	0.0576923
DNAJB7	55	0.145455	0.818182	0.0363636	0.177778	0.0444444	0.25	0.170213	4.5	0.0377358
DPM1	55	0.163636	0.818182	0.0181818	0.2	0.0222222	0.111111	0.195652	4.5	0.0185185
DYDC2	44	0.181818	0.818182	0	0.222222	0	0	0.222222	4.5	0
EGFLAM_ENST00000336740	22	0.0909091	0.818182	0.0909091	0.111111	0.111111	1	0.1	4.5	0.1
EID3	55	0.181818	0.818182	0	0.222222	0	0	0.222222	4.5	0
ENDOU_ENST00000542202	33	0.151515	0.818182	0.030303	0.185185	0.037037	0.2	0.178571	4.5	0.03125
ENSG00000196979	11	0	0.818182	0.181818				0	4.5	0.222222
ENSG00000230786	11	0.181818	0.818182	0	0.222222	0	0	0.222222	4.5	0
ENSG00000257028	11	0.181818	0.818182	0	0.222222	0	0	0.222222	4.5	0
FAM103A1	11	0.181818	0.818182	0	0.222222	0	0	0.222222	4.5	0
FAM110C	66	0.181818	0.818182	0	0.222222	0	0	0.222222	4.5	0
FAM21A_ENST00000434114	11	0.0909091	0.818182	0.0909091	0.111111	0.111111	1	0.1	4.5	0.1
FAM32A	22	0.181818	0.818182	0	0.222222	0	0	0.222222	4.5	0
FXC1	11	0.181818	0.818182	0	0.222222	0	0	0.222222	4.5	0
FXYD2	11	0.181818	0.818182	0	0.222222	0	0	0.222222	4.5	0
GABARAPL1	22	0.181818	0.818182	0	0.222222	0	0	0.222222	4.5	0
GORASP1	88	0.181818	0.818182	0	0.222222	0	0	0.222222	4.5	0
GPR82	44	0.159091	0.818182	0.0227273	0.194444	0.0277778	0.142857	0.189189	4.5	0.0232558
GPR82_ENST00000302548	44	0.159091	0.818182	0.0227273	0.194444	0.0277778	0.142857	0.189189	4.5	0.0232558
HESX1	44	0.159091	0.818182	0.0227273	0.194444	0.0277778	0.142857	0.189189	4.5	0.0232558
HLA-DQB1_ENST00000374943	11	0.181818	0.818182	0	0.222222	0	0	0.222222	4.5	0
HLA-DRA	77	0.142857	0.818182	0.038961	0.174603	0.047619	0.272727	0.166667	4.5	0.0405405
ISCA1_ENST00000452279	11	0.181818	0.818182	0	0.222222	0	0	0.222222	4.5	0
KCNE3	33	0.151515	0.818182	0.030303	0.185185	0.037037	0.2	0.178571	4.5	0.03125
KCNMA1_ENST00000450795	11	0.181818	0.818182	0	0.222222	0	0	0.222222	4.5	0
KRTAP12-4	44	0.181818	0.818182	0	0.222222	0	0	0.222222	4.5	0
LMO3_ENST00000261169	22	0.181818	0.818182	0	0.222222	0	0	0.222222	4.5	0
LOC390335	11	0.181818	0.818182	0	0.222222	0	0	0.222222	4.5	0
LOC441511	11	0.181818	0.818182	0	0.222222	0	0	0.222222	4.5	0
LYRM5	11	0.181818	0.818182	0	0.222222	0	0	0.222222	4.5	0
LYRM7	11	0.181818	0.818182	0	0.222222	0	0	0.222222	4.5	0
MAPK9_ENST00000397072	11	0.0909091	0.818182	0.0909091	0.111111	0.111111	1	0.1	4.5	0.1
MARCH7	121	0.115702	0.818182	0.0661157	0.141414	0.0808081	0.571429	0.130841	4.5	0.0707965
MCTS1	33	0.0909091	0.818182	0.0909091	0.111111	0.111111	1	0.1	4.5	0.1
MRPS34	33	0.181818	0.818182	0	0.222222	0	0	0.222222	4.5	0
MT1B	11	0.0909091	0.818182	0.0909091	0.111111	0.111111	1	0.1	4.5	0.1
MYCL1_ENST00000397332	110	0.109091	0.818182	0.0727273	0.133333	0.0888889	0.666667	0.122449	4.5	0.0784314
NPC2	22	0.181818	0.818182	0	0.222222	0	0	0.222222	4.5	0
NSMCE4A	44	0.0681818	0.818182	0.113636	0.0833333	0.138889	1.66667	0.0731707	4.5	0.128205
NUDT21	33	0.151515	0.818182	0.030303	0.185185	0.037037	0.2	0.178571	4.5	0.03125
NUSAP1	77	0.12987	0.818182	0.0519481	0.15873	0.0634921	0.4	0.149254	4.5	0.0547945
OXSM	88	0.147727	0.818182	0.0340909	0.180556	0.0416667	0.230769	0.173333	4.5	0.0352941
PBXIP1_ENST00000368460	44	0.159091	0.818182	0.0227273	0.194444	0.0277778	0.142857	0.189189	4.5	0.0232558
PCBP2	88	0.147727	0.818182	0.0340909	0.180556	0.0416667	0.230769	0.173333	4.5	0.0352941
PIP5K1C_ENST00000537021	121	0.181818	0.818182	0	0.222222	0	0	0.222222	4.5	0
PLSCR4	77	0.116883	0.818182	0.0649351	0.142857	0.0793651	0.555556	0.132353	4.5	0.0694444
PSMB5_ENST00000493471	33	0.151515	0.818182	0.030303	0.185185	0.037037	0.2	0.178571	4.5	0.03125
PTPLB	22	0.181818	0.818182	0	0.222222	0	0	0.222222	4.5	0
Q96HF5_HUMAN	11	0.0909091	0.818182	0.0909091	0.111111	0.111111	1	0.1	4.5	0.1
RBM3	22	0.136364	0.818182	0.0454545	0.166667	0.0555556	0.333333	0.157895	4.5	0.047619
RNASE13	44	0.181818	0.818182	0	0.222222	0	0	0.222222	4.5	0
RPS29_ENST00000396020	11	0	0.818182	0.181818				0	4.5	0.222222
S100A8	33	0.181818	0.818182	0	0.222222	0	0	0.222222	4.5	0
SgK424	11	0.181818	0.818182	0	0.222222	0	0	0.222222	4.5	0
SH2D6	33	0.181818	0.818182	0	0.222222	0	0	0.222222	4.5	0
SH3BP2_ENST00000389838	11	0.0909091	0.818182	0.0909091	0.111111	0.111111	1	0.1	4.5	0.1
SNX3_ENST00000368982	11	0	0.818182	0.181818				0	4.5	0.222222
SPATA9_ENST00000395899	22	0.181818	0.818182	0	0.222222	0	0	0.222222	4.5	0
SPEG_ENST00000396688	33	0.181818	0.818182	0	0.222222	0	0	0.222222	4.5	0
TBC1D2B_ENST00000300584	198	0.166667	0.818182	0.0151515	0.203704	0.0185185	0.0909091	0.2	4.5	0.0153846
TGIF2	55	0.181818	0.818182	0	0.222222	0	0	0.222222	4.5	0
TIGD1	44	0.159091	0.818182	0.0227273	0.194444	0.0277778	0.142857	0.189189	4.5	0.0232558
TMEM160	22	0.181818	0.818182	0	0.222222	0	0	0.222222	4.5	0
TPT1	33	0.181818	0.818182	0	0.222222	0	0	0.222222	4.5	0
UBE2D1	33	0.151515	0.818182	0.030303	0.185185	0.037037	0.2	0.178571	4.5	0.03125
UCN2	22	0.136364	0.818182	0.0454545	0.166667	0.0555556	0.333333	0.157895	4.5	0.047619
UGP2	99	0.161616	0.818182	0.020202	0.197531	0.0246914	0.125	0.192771	4.5	0.0206186
XPNPEP3_ENST00000414396	22	0.181818	0.818182	0	0.222222	0	0	0.222222	4.5	0
ZBED3	11	0.0909091	0.818182	0.0909091	0.111111	0.111111	1	0.1	4.5	0.1
ZNF649	132	0.174242	0.818182	0.00757576	0.212963	0.00925926	0.0434783	0.211009	4.5	0.00763359
ZSCAN2_ENST00000334141	22	0.181818	0.818182	0	0.222222	0	0	0.222222	4.5	0
TP53_ENST00000269305	11003	0.0106335	0.81805	0.171317	0.0129986	0.209421	16.1111	0.0107477	4.496	0.206734
BRD4_ENST00000263377	489	0.149284	0.817996	0.0327198	0.1825	0.04	0.219178	0.175481	4.49438	0.0338266
PAX5	280	0.164286	0.817857	0.0178571	0.200873	0.0218341	0.108696	0.196581	4.4902	0.0181818
CEP290_ENST00000309041	203	0.0935961	0.817734	0.08867	0.114458	0.108434	0.947368	0.103261	4.48649	0.0972973
RANBP6	203	0.172414	0.817734	0.00985222	0.210843	0.0120482	0.0571429	0.208333	4.48649	0.00995025
FBXW7_ENST00000534231	1004	0.0278884	0.817729	0.154382	0.0341048	0.188794	5.53571	0.0286885	4.48634	0.182568
PAK2_ENST00000327134	148	0.162162	0.817568	0.0202703	0.198347	0.0247934	0.125	0.193548	4.48148	0.0206897
TBRG4	137	0.153285	0.817518	0.0291971	0.1875	0.0357143	0.190476	0.181034	4.48	0.0300752
CCDC9	126	0.174603	0.81746	0.00793651	0.213592	0.00970874	0.0454545	0.211538	4.47826	0.008
USO1	126	0.126984	0.81746	0.0555556	0.15534	0.0679612	0.4375	0.145455	4.47826	0.0588235
CAPS2_ENST00000409445	115	0.113043	0.817391	0.0695652	0.138298	0.0851064	0.615385	0.127451	4.47619	0.0747664
COIL	115	0.156522	0.817391	0.026087	0.191489	0.0319149	0.166667	0.185567	4.47619	0.0267857
SERPIND1	115	0.173913	0.817391	0.00869565	0.212766	0.0106383	0.05	0.210526	4.47619	0.00877193
SERPIND1_ENST00000215727	115	0.173913	0.817391	0.00869565	0.212766	0.0106383	0.05	0.210526	4.47619	0.00877193
HOMEZ	104	0.144231	0.817308	0.0384615	0.176471	0.0470588	0.266667	0.168539	4.47368	0.04
MSL3_ENST00000398527	104	0.134615	0.817308	0.0480769	0.164706	0.0588235	0.357143	0.155556	4.47368	0.0505051
ANKRD36C_ENST00000295246	93	0.16129	0.817204	0.0215054	0.197368	0.0263158	0.133333	0.192308	4.47059	0.021978
RG9MTD1	93	0.129032	0.817204	0.0537634	0.157895	0.0657895	0.416667	0.148148	4.47059	0.0568182
ARSK	82	0.121951	0.817073	0.0609756	0.149254	0.0746269	0.5	0.138889	4.46667	0.0649351
DHRS9_ENST00000432060	82	0.170732	0.817073	0.0121951	0.208955	0.0149254	0.0714286	0.205882	4.46667	0.0123457
EIF3I	82	0.158537	0.817073	0.0243902	0.19403	0.0298507	0.153846	0.188406	4.46667	0.025
ERV3-1	82	0.146341	0.817073	0.0365854	0.179104	0.0447761	0.25	0.171429	4.46667	0.0379747
CXorf30_ENST00000378657	153	0.130719	0.816993	0.0522876	0.16	0.064	0.4	0.150376	4.46429	0.0551724
BCAP29	71	0.15493	0.816901	0.028169	0.189655	0.0344828	0.181818	0.183333	4.46154	0.0289855
H3F3B	71	0.126761	0.816901	0.056338	0.155172	0.0689655	0.444444	0.145161	4.46154	0.0597015
SGPP1	71	0.0985915	0.816901	0.084507	0.12069	0.103448	0.857143	0.109375	4.46154	0.0923077
C7orf33	60	0.183333	0.816667	0	0.22449	0	0	0.22449	4.45455	0
ETV1_ENST00000403527	240	0.129167	0.816667	0.0541667	0.158163	0.0663265	0.419355	0.148325	4.45455	0.0572687
EXOSC4	60	0.183333	0.816667	0	0.22449	0	0	0.22449	4.45455	0
GSTM5	60	0.15	0.816667	0.0333333	0.183673	0.0408163	0.222222	0.176471	4.45455	0.0344828
LDHA_ENST00000540430	60	0.15	0.816667	0.0333333	0.183673	0.0408163	0.222222	0.176471	4.45455	0.0344828
NANOS3	60	0.166667	0.816667	0.0166667	0.204082	0.0204082	0.1	0.2	4.45455	0.0169492
PHB	60	0.166667	0.816667	0.0166667	0.204082	0.0204082	0.1	0.2	4.45455	0.0169492
POLB_ENST00000265421	60	0.133333	0.816667	0.05	0.163265	0.0612245	0.375	0.153846	4.45455	0.0526316
TGDS	60	0.183333	0.816667	0	0.22449	0	0	0.22449	4.45455	0
TRIM13_ENST00000356017	60	0.166667	0.816667	0.0166667	0.204082	0.0204082	0.1	0.2	4.45455	0.0169492
C7orf63	218	0.155963	0.816514	0.0275229	0.191011	0.0337079	0.176471	0.184783	4.45	0.0283019
SSX2IP_ENST00000370612	109	0.119266	0.816514	0.0642202	0.146067	0.0786517	0.538462	0.135417	4.45	0.0686275
SLITRK6	354	0.138418	0.816384	0.0451977	0.16955	0.0553633	0.326531	0.160656	4.44615	0.0473373
COPS8	49	0.142857	0.816327	0.0408163	0.175	0.05	0.285714	0.166667	4.44444	0.0425532
DMTF1_ENST00000394702	49	0.183673	0.816327	0	0.225	0	0	0.225	4.44444	0
DNAH2_ENST00000570791	147	0.122449	0.816327	0.0612245	0.15	0.075	0.5	0.139535	4.44444	0.0652174
EDN1	49	0.102041	0.816327	0.0816327	0.125	0.1	0.8	0.113636	4.44444	0.0888889
METTL15	49	0.163265	0.816327	0.0204082	0.2	0.025	0.125	0.195122	4.44444	0.0208333
RCN2	49	0.142857	0.816327	0.0408163	0.175	0.05	0.285714	0.166667	4.44444	0.0425532
B3GALT2	87	0.149425	0.816092	0.0344828	0.183099	0.0422535	0.230769	0.175676	4.4375	0.0357143
AXL_ENST00000301178	424	0.158019	0.816038	0.0259434	0.193642	0.0317919	0.164179	0.187675	4.4359	0.0266344
FBXO11_ENST00000403359	201	0.134328	0.81592	0.0497512	0.164634	0.0609756	0.37037	0.155172	4.43243	0.052356
BZW2	76	0.131579	0.815789	0.0526316	0.16129	0.0645161	0.4	0.151515	4.42857	0.0555556
C6orf62_ENST00000378102	38	0.157895	0.815789	0.0263158	0.193548	0.0322581	0.166667	0.1875	4.42857	0.027027
CHIC1	38	0.131579	0.815789	0.0526316	0.16129	0.0645161	0.4	0.151515	4.42857	0.0555556
CHMP1B	38	0.184211	0.815789	0	0.225806	0	0	0.225806	4.42857	0
CHMP1B_ENST00000526991	38	0.184211	0.815789	0	0.225806	0	0	0.225806	4.42857	0
CTPS1_ENST00000543104	38	0.105263	0.815789	0.0789474	0.129032	0.0967742	0.75	0.117647	4.42857	0.0857143
CXorf30	152	0.138158	0.815789	0.0460526	0.169355	0.0564516	0.333333	0.160305	4.42857	0.0482759
CYP4X1_ENST00000538609	38	0.184211	0.815789	0	0.225806	0	0	0.225806	4.42857	0
ETHE1	38	0.184211	0.815789	0	0.225806	0	0	0.225806	4.42857	0
FAM21C	76	0.131579	0.815789	0.0526316	0.16129	0.0645161	0.4	0.151515	4.42857	0.0555556
FGF14_ENST00000376143	114	0.175439	0.815789	0.00877193	0.215054	0.0107527	0.05	0.212766	4.42857	0.00884956
ICOS	38	0.105263	0.815789	0.0789474	0.129032	0.0967742	0.75	0.117647	4.42857	0.0857143
LTA4H_ENST00000413268	76	0.144737	0.815789	0.0394737	0.177419	0.0483871	0.272727	0.169231	4.42857	0.0410959
RAX2	38	0.184211	0.815789	0	0.225806	0	0	0.225806	4.42857	0
STRN3_ENST00000357479	114	0.140351	0.815789	0.0438596	0.172043	0.0537634	0.3125	0.163265	4.42857	0.0458716
TMEM156	76	0.171053	0.815789	0.0131579	0.209677	0.016129	0.0769231	0.206349	4.42857	0.0133333
TMEM17	38	0.0789474	0.815789	0.105263	0.0967742	0.129032	1.33333	0.0857143	4.42857	0.117647
ZFP36L2	190	0.115789	0.815789	0.0684211	0.141935	0.083871	0.590909	0.130952	4.42857	0.0734463
NMT2	103	0.126214	0.815534	0.0582524	0.154762	0.0714286	0.461538	0.144444	4.42105	0.0618557
EIF3A	298	0.154362	0.815436	0.0302013	0.1893	0.037037	0.195652	0.18254	4.41818	0.0311419
AIMP2	65	0.153846	0.815385	0.0307692	0.188679	0.0377358	0.2	0.181818	4.41667	0.031746
AVL9_ENST00000404479	65	0.153846	0.815385	0.0307692	0.188679	0.0377358	0.2	0.181818	4.41667	0.031746
C12orf26	157	0.11465	0.815287	0.0700637	0.140625	0.0859375	0.611111	0.129496	4.41379	0.0753425
FRRS1_ENST00000287474	92	0.141304	0.815217	0.0434783	0.173333	0.0533333	0.307692	0.164557	4.41176	0.0454545
SNAP25_ENST00000254976	92	0.130435	0.815217	0.0543478	0.16	0.0666667	0.416667	0.15	4.41176	0.0574713
IRF4_ENST00000380956	330	0.130303	0.815152	0.0545455	0.159851	0.0669145	0.418605	0.149826	4.40984	0.0576923
AHNAK2	119	0.151261	0.815126	0.0336134	0.185567	0.0412371	0.222222	0.178218	4.40909	0.0347826
ANXA10	119	0.12605	0.815126	0.0588235	0.154639	0.0721649	0.466667	0.144231	4.40909	0.0625
KAT8	119	0.168067	0.815126	0.0168067	0.206186	0.0206186	0.1	0.20202	4.40909	0.017094
LUM	119	0.151261	0.815126	0.0336134	0.185567	0.0412371	0.222222	0.178218	4.40909	0.0347826
TTC3_ENST00000540756	119	0.142857	0.815126	0.0420168	0.175258	0.0515464	0.294118	0.166667	4.40909	0.0438596
POTEM	146	0.164384	0.815068	0.0205479	0.201681	0.0252101	0.125	0.196721	4.40741	0.020979
MYO9A_ENST00000424560	481	0.126819	0.814969	0.0582121	0.155612	0.0714286	0.459016	0.145238	4.40449	0.0618102
ABCB5_ENST00000443026	54	0.12963	0.814815	0.0555556	0.159091	0.0681818	0.428571	0.148936	4.4	0.0588235
ALKBH3_ENST00000378840	27	0.185185	0.814815	0	0.227273	0	0	0.227273	4.4	0
B9D2	54	0.166667	0.814815	0.0185185	0.204545	0.0227273	0.111111	0.2	4.4	0.0188679
C1orf204	27	0.148148	0.814815	0.037037	0.181818	0.0454545	0.25	0.173913	4.4	0.0384615
C1orf204_ENST00000368102	27	0.148148	0.814815	0.037037	0.181818	0.0454545	0.25	0.173913	4.4	0.0384615
C1orf210	27	0.185185	0.814815	0	0.227273	0	0	0.227273	4.4	0
C4orf29	54	0.0925926	0.814815	0.0925926	0.113636	0.113636	1	0.102041	4.4	0.102041
CCDC68	108	0.138889	0.814815	0.0462963	0.170455	0.0568182	0.333333	0.16129	4.4	0.0485437
CLEC1B	54	0.166667	0.814815	0.0185185	0.204545	0.0227273	0.111111	0.2	4.4	0.0188679
CNTNAP3_ENST00000377653	54	0.166667	0.814815	0.0185185	0.204545	0.0227273	0.111111	0.2	4.4	0.0188679
DNASE2B	27	0.0740741	0.814815	0.111111	0.0909091	0.136364	1.5	0.08	4.4	0.125
DNMBP_ENST00000422692	27	0.111111	0.814815	0.0740741	0.136364	0.0909091	0.666667	0.125	4.4	0.08
FAM96B	27	0.148148	0.814815	0.037037	0.181818	0.0454545	0.25	0.173913	4.4	0.0384615
FAM96B_ENST00000422424	27	0.148148	0.814815	0.037037	0.181818	0.0454545	0.25	0.173913	4.4	0.0384615
FBXL22	27	0.148148	0.814815	0.037037	0.181818	0.0454545	0.25	0.173913	4.4	0.0384615
FBXO34	135	0.148148	0.814815	0.037037	0.181818	0.0454545	0.25	0.173913	4.4	0.0384615
H1FX	27	0.185185	0.814815	0	0.227273	0	0	0.227273	4.4	0
H2BFM	54	0.166667	0.814815	0.0185185	0.204545	0.0227273	0.111111	0.2	4.4	0.0188679
HORMAD2	54	0.185185	0.814815	0	0.227273	0	0	0.227273	4.4	0
KRTAP22-2	27	0.185185	0.814815	0	0.227273	0	0	0.227273	4.4	0
METTL7B_ENST00000394252	54	0.148148	0.814815	0.037037	0.181818	0.0454545	0.25	0.173913	4.4	0.0384615
MUC1_ENST00000457295	27	0.185185	0.814815	0	0.227273	0	0	0.227273	4.4	0
PA2G4	108	0.138889	0.814815	0.0462963	0.170455	0.0568182	0.333333	0.16129	4.4	0.0485437
PPHLN1_ENST00000395568	135	0.155556	0.814815	0.0296296	0.190909	0.0363636	0.190476	0.184211	4.4	0.0305344
PPIL2_ENST00000456792	54	0.166667	0.814815	0.0185185	0.204545	0.0227273	0.111111	0.2	4.4	0.0188679
PSMG4	27	0.185185	0.814815	0	0.227273	0	0	0.227273	4.4	0
PSMG4_ENST00000419065	27	0.185185	0.814815	0	0.227273	0	0	0.227273	4.4	0
RFESD_ENST00000458310	27	0.148148	0.814815	0.037037	0.181818	0.0454545	0.25	0.173913	4.4	0.0384615
RGN	54	0.166667	0.814815	0.0185185	0.204545	0.0227273	0.111111	0.2	4.4	0.0188679
RGPD2	27	0.148148	0.814815	0.037037	0.181818	0.0454545	0.25	0.173913	4.4	0.0384615
RPE_ENST00000429921	27	0.185185	0.814815	0	0.227273	0	0	0.227273	4.4	0
SIMC1_ENST00000429602	27	0.185185	0.814815	0	0.227273	0	0	0.227273	4.4	0
TFEC_ENST00000457268	27	0.185185	0.814815	0	0.227273	0	0	0.227273	4.4	0
TMEM136	27	0.111111	0.814815	0.0740741	0.136364	0.0909091	0.666667	0.125	4.4	0.08
TOMM20	27	0.148148	0.814815	0.037037	0.181818	0.0454545	0.25	0.173913	4.4	0.0384615
TXNRD1	81	0.135802	0.814815	0.0493827	0.166667	0.0606061	0.363636	0.157143	4.4	0.0519481
UNQ3045	27	0.148148	0.814815	0.037037	0.181818	0.0454545	0.25	0.173913	4.4	0.0384615
VEGFB	54	0.148148	0.814815	0.037037	0.181818	0.0454545	0.25	0.173913	4.4	0.0384615
ZNRF2	27	0.185185	0.814815	0	0.227273	0	0	0.227273	4.4	0
LRP12	259	0.142857	0.814672	0.042471	0.175355	0.0521327	0.297297	0.166667	4.39583	0.0443548
SMC3	232	0.12931	0.814655	0.0560345	0.15873	0.0687831	0.433333	0.148515	4.39535	0.0593607
KIAA1107	178	0.140449	0.814607	0.0449438	0.172414	0.0551724	0.32	0.163399	4.39394	0.0470588
PGCP	151	0.145695	0.81457	0.0397351	0.178862	0.0487805	0.272727	0.170543	4.39286	0.0413793
CPSF6_ENST00000266679	124	0.137097	0.814516	0.0483871	0.168317	0.0594059	0.352941	0.158879	4.3913	0.0508475
DONSON	97	0.123711	0.814433	0.0618557	0.151899	0.0759494	0.5	0.141176	4.38889	0.0659341
MIER1_ENST00000401041	97	0.154639	0.814433	0.0309278	0.189873	0.0379747	0.2	0.182927	4.38889	0.0319149
RIC3	97	0.134021	0.814433	0.0515464	0.164557	0.0632911	0.384615	0.154762	4.38889	0.0543478
TDG	97	0.123711	0.814433	0.0618557	0.151899	0.0759494	0.5	0.141176	4.38889	0.0659341
ZC3H14	167	0.137725	0.814371	0.0479042	0.169118	0.0588235	0.347826	0.159722	4.3871	0.0503145
AGAP4	70	0.171429	0.814286	0.0142857	0.210526	0.0175439	0.0833333	0.206897	4.38462	0.0144928
BTG2	70	0.171429	0.814286	0.0142857	0.210526	0.0175439	0.0833333	0.206897	4.38462	0.0144928
C3orf26	70	0.142857	0.814286	0.0428571	0.175439	0.0526316	0.3	0.166667	4.38462	0.0447761
HOGA1	70	0.142857	0.814286	0.0428571	0.175439	0.0526316	0.3	0.166667	4.38462	0.0447761
MRPS31	70	0.0857143	0.814286	0.1	0.105263	0.122807	1.16667	0.09375	4.38462	0.111111
RICTOR	506	0.120553	0.814229	0.0652174	0.148058	0.0800971	0.540984	0.137079	4.38298	0.0697674
CDC16	113	0.141593	0.814159	0.0442478	0.173913	0.0543478	0.3125	0.164948	4.38095	0.0462963
RASGEF1B	113	0.150442	0.814159	0.0353982	0.184783	0.0434783	0.235294	0.177083	4.38095	0.0366972
ERG_ENST00000288319	269	0.141264	0.814126	0.0446097	0.173516	0.0547945	0.315789	0.164502	4.38	0.0466926
C5orf22	86	0.174419	0.813953	0.0116279	0.214286	0.0142857	0.0666667	0.211268	4.375	0.0117647
CT45A5	43	0.116279	0.813953	0.0697674	0.142857	0.0857143	0.6	0.131579	4.375	0.075
CXorf65_ENST00000438526	43	0.162791	0.813953	0.0232558	0.2	0.0285714	0.142857	0.194444	4.375	0.0238095
GSTM5_ENST00000369813	43	0.139535	0.813953	0.0465116	0.171429	0.0571429	0.333333	0.162162	4.375	0.0487805
[truncated: 27,334 more rows]

## Sheet: N50
Gene name; N50 (=21307)	Number of substitutions	fS	fM	fN	rSM	rNM	rNS	rSMN	rMSN	rNSM
KRAS	10661	0.00384579	0.995498	0.000656599	0.00386319	0.000659568	0.170732	0.00386064	221.104	0.00065703
KRAS_ENST00000256078	4842	0.00743494	0.991945	0.000619579	0.00749532	0.00062461	0.0833333	0.00749064	123.154	0.000619963
IDH1	1912	0.00732218	0.989017	0.00366109	0.00740349	0.00370175	0.5	0.00737619	90.0476	0.00367454
NRAS	1449	0.00759144	0.988958	0.00345066	0.0076762	0.00348918	0.454545	0.00764951	89.5625	0.0034626
PIK3CA	5839	0.0101045	0.98373	0.00616544	0.0102716	0.00626741	0.610169	0.0102076	60.4632	0.00620369
DUX4L1	116	0	0.982759	0.0172414				0	57	0.0175439
PIK3CA_ENST00000263967	4241	0.0103749	0.98208	0.00754539	0.0105642	0.00768307	0.727273	0.0104837	54.8026	0.00760276
BRAF	5024	0.0147293	0.980494	0.00477707	0.0150223	0.00487211	0.324324	0.0149495	50.2653	0.0048
MED12_ENST00000429213	50	0.02	0.98	0	0.0204082	0	0	0.0204082	49	0
HRAS	737	0.0149254	0.979647	0.00542741	0.0152355	0.00554017	0.363636	0.0151515	48.1333	0.00545703
DUX4L6	74	0	0.972973	0.027027				0	36	0.0277778
DUX4L3	71	0.028169	0.971831	0	0.0289855	0	0	0.0289855	34.5	0
CTNNB1	2518	0.0142971	0.971803	0.0138999	0.0147119	0.0143032	0.972222	0.0145044	34.4648	0.0140959
H3F3A	265	0.0264151	0.969811	0.00377358	0.0272374	0.00389105	0.142857	0.0271318	32.125	0.00378788
DUX4L7	55	0	0.963636	0.0363636				0	26.5	0.0377358
HRAS_ENST00000397594	369	0.0243902	0.96206	0.0135501	0.0253521	0.0140845	0.555556	0.025	25.3571	0.0137363
MYD88	420	0.0309524	0.954762	0.0142857	0.032419	0.0149626	0.461538	0.031941	21.1053	0.0144928
JAK2	1888	0.0291314	0.947564	0.0233051	0.0307434	0.0245947	0.8	0.0300055	18.0707	0.0238612
SF3B1	1209	0.0430108	0.945409	0.0115798	0.0454943	0.0122485	0.269231	0.0449438	17.3182	0.0117155
GNAS	724	0.0345304	0.94337	0.0220994	0.0366032	0.0234261	0.64	0.0357654	16.6585	0.0225989
RHOA	308	0.0487013	0.941558	0.00974026	0.0517241	0.0103448	0.2	0.0511945	16.1111	0.00983607
DDX3Y	51	0.0392157	0.941176	0.0196078	0.0416667	0.0208333	0.5	0.0408163	16	0.02
PTGER1	51	0.0588235	0.941176	0	0.0625	0	0	0.0625	16	0
SPOP	423	0.0283688	0.940898	0.0307329	0.0301508	0.0326633	1.08333	0.0291971	15.92	0.0317073
IDH2	404	0.0420792	0.935644	0.0222772	0.0449735	0.0238095	0.529412	0.0439276	14.5385	0.0227848
NFE2L2	610	0.0409836	0.934426	0.0245902	0.0438596	0.0263158	0.6	0.042735	14.25	0.0252101
U2AF1	337	0.0534125	0.931751	0.0148368	0.0573248	0.0159236	0.277778	0.0564263	13.6522	0.0150602
DUX4L5	72	0.0416667	0.930556	0.0277778	0.0447761	0.0298507	0.666667	0.0434783	13.4	0.0285714
ERCC2_ENST00000485403	184	0.0652174	0.929348	0.00543478	0.0701754	0.00584795	0.0833333	0.0697674	13.1538	0.00546448
EIF1AX	126	0.0396825	0.928571	0.031746	0.042735	0.034188	0.8	0.0413223	13	0.0327869
FGFR3	1284	0.0700935	0.928349	0.00155763	0.0755034	0.00167785	0.0222222	0.0753769	12.9565	0.00156006
METTL14	96	0.0520833	0.927083	0.0208333	0.0561798	0.0224719	0.4	0.0549451	12.7143	0.0212766
AKT1	509	0.0667976	0.923379	0.00982318	0.0723404	0.0106383	0.147059	0.0715789	12.0513	0.00992063
SRSF2	274	0.0620438	0.923358	0.0145985	0.0671937	0.0158103	0.235294	0.0661479	12.0476	0.0148148
MED12	2017	0.0525533	0.923153	0.0242935	0.056928	0.0263158	0.462264	0.0554683	12.0129	0.0248984
FOXD4L3	65	0.0769231	0.923077	0	0.0833333	0	0	0.0833333	12	0
CDKL3_ENST00000435240	50	0.06	0.92	0.02	0.0652174	0.0217391	0.333333	0.0638298	11.5	0.0204082
KCNJ5	694	0.0720461	0.919308	0.00864553	0.0783699	0.00940439	0.12	0.0776398	11.3929	0.00872093
ERBB2_ENST00000541774	578	0.0692042	0.918685	0.0121107	0.0753296	0.0131827	0.175	0.0743494	11.2979	0.0122592
GABPB1_ENST00000429662	60	0.0666667	0.916667	0.0166667	0.0727273	0.0181818	0.25	0.0714286	11	0.0169492
MRPS22	84	0.0714286	0.916667	0.0119048	0.0779221	0.012987	0.166667	0.0769231	11	0.0120482
FOXL2	268	0.0783582	0.914179	0.00746269	0.0857143	0.00816327	0.0952381	0.0850202	10.6522	0.0075188
U2AF1_ENST00000380276	277	0.0685921	0.913357	0.0180505	0.0750988	0.0197628	0.263158	0.0736434	10.5417	0.0183824
BZW1_ENST00000452790	68	0.0588235	0.911765	0.0294118	0.0645161	0.0322581	0.5	0.0625	10.3333	0.030303
ZNF207_ENST00000394670	75	0.04	0.906667	0.0533333	0.0441176	0.0588235	1.33333	0.0416667	9.71429	0.056338
PRB3	150	0.0533333	0.906667	0.04	0.0588235	0.0441176	0.75	0.056338	9.71429	0.0416667
EGFR	1890	0.0814815	0.906349	0.0121693	0.0899008	0.0134267	0.149351	0.0887097	9.67797	0.0123192
FAM200A	85	0.0705882	0.905882	0.0235294	0.0779221	0.025974	0.333333	0.0759494	9.625	0.0240964
SENP7_ENST00000394085	72	0.0555556	0.902778	0.0416667	0.0615385	0.0461538	0.75	0.0588235	9.28571	0.0434783
FAM174B	61	0.0983607	0.901639	0	0.109091	0	0	0.109091	9.16667	0
MAP2K1	272	0.0772059	0.900735	0.0220588	0.0857143	0.0244898	0.285714	0.0836653	9.07407	0.0225564
DDX17_ENST00000396821	50	0.08	0.9	0.02	0.0888889	0.0222222	0.25	0.0869565	9	0.0204082
IGF1	80	0.075	0.9	0.025	0.0833333	0.0277778	0.333333	0.0810811	9	0.025641
ERBB2	969	0.0897833	0.895769	0.0144479	0.10023	0.016129	0.16092	0.0986395	8.59406	0.0146597
PEX13	67	0.0895522	0.895522	0.0149254	0.1	0.0166667	0.166667	0.0983607	8.57143	0.0151515
LCE2D	57	0.105263	0.894737	0	0.117647	0	0	0.117647	8.5	0
C1orf110	76	0.0921053	0.894737	0.0131579	0.102941	0.0147059	0.142857	0.101449	8.5	0.0133333
AR_ENST00000396043	237	0.0421941	0.894515	0.0632911	0.0471698	0.0707547	1.5	0.0440529	8.48	0.0675676
RAC1	167	0.101796	0.892216	0.00598802	0.114094	0.00671141	0.0588235	0.113333	8.27778	0.0060241
CTAGE9	74	0.0810811	0.891892	0.027027	0.0909091	0.030303	0.333333	0.0882353	8.25	0.0277778
CTAGE9_ENST00000314099	74	0.0810811	0.891892	0.027027	0.0909091	0.030303	0.333333	0.0882353	8.25	0.0277778
RAD51B_ENST00000471583	83	0.0843373	0.891566	0.0240964	0.0945946	0.027027	0.285714	0.0921053	8.22222	0.0246914
APOBEC3H	55	0.0909091	0.890909	0.0181818	0.102041	0.0204082	0.2	0.1	8.16667	0.0185185
KLHL23	100	0.09	0.89	0.02	0.101124	0.0224719	0.222222	0.0989011	8.09091	0.0204082
ERBB3_ENST00000411731	145	0.0758621	0.889655	0.0344828	0.0852713	0.0387597	0.454545	0.0820896	8.0625	0.0357143
MYCN	286	0.0909091	0.888112	0.020979	0.102362	0.023622	0.230769	0.1	7.9375	0.0214286
CAPZA1	62	0.0967742	0.887097	0.016129	0.109091	0.0181818	0.166667	0.107143	7.85714	0.0163934
PTPRS_ENST00000262963	416	0.0865385	0.887019	0.0264423	0.097561	0.0298103	0.305556	0.0947368	7.85106	0.0271605
EIF2S1	53	0.113208	0.886792	0	0.12766	0	0	0.12766	7.83333	0
ERBB3_ENST00000267101	767	0.0925684	0.886571	0.0208605	0.104412	0.0235294	0.225352	0.102011	7.81609	0.0213049
PRB3_ENST00000538488	149	0.0671141	0.885906	0.0469799	0.0757576	0.0530303	0.7	0.0719424	7.76471	0.0492958
PRAMEF9	78	0.115385	0.884615	0	0.130435	0	0	0.130435	7.66667	0
KIT	1081	0.0980574	0.884366	0.0175763	0.110879	0.0198745	0.179245	0.108718	7.648	0.0178908
DEGS1	69	0.101449	0.884058	0.0144928	0.114754	0.0163934	0.142857	0.112903	7.625	0.0147059
CTBS	60	0.116667	0.883333	0	0.132075	0	0	0.132075	7.57143	0
EIF3M	77	0.0649351	0.883117	0.0519481	0.0735294	0.0588235	0.8	0.0694444	7.55556	0.0547945
NIF3L1	68	0.0882353	0.882353	0.0294118	0.1	0.0333333	0.333333	0.0967742	7.5	0.030303
RFX7_ENST00000317318	59	0.101695	0.881356	0.0169492	0.115385	0.0192308	0.166667	0.113208	7.42857	0.0172414
PTPN11	527	0.0910816	0.880455	0.028463	0.103448	0.0323276	0.3125	0.100209	7.36508	0.0292969
HIST3H3	92	0.119565	0.880435	0	0.135802	0	0	0.135802	7.36364	0
NKX3-1	92	0.076087	0.880435	0.0434783	0.0864198	0.0493827	0.571429	0.0823529	7.36364	0.0454545
GOLGA8B	50	0.12	0.88	0	0.136364	0	0	0.136364	7.33333	0
GOLGA8B_ENST00000267731	50	0.12	0.88	0	0.136364	0	0	0.136364	7.33333	0
PLEKHF2	50	0.1	0.88	0.02	0.113636	0.0227273	0.2	0.111111	7.33333	0.0204082
TMEM217	50	0.08	0.88	0.04	0.0909091	0.0454545	0.5	0.0869565	7.33333	0.0416667
RUNX1_ENST00000344691	141	0.035461	0.879433	0.0851064	0.0403226	0.0967742	2.4	0.0367647	7.29412	0.0930233
PPIE_ENST00000356511	58	0.103448	0.87931	0.0172414	0.117647	0.0196078	0.166667	0.115385	7.28571	0.0175439
ASAH1_ENST00000381733	74	0.0810811	0.878378	0.0405405	0.0923077	0.0461538	0.5	0.0882353	7.22222	0.0422535
VEGFA_ENST00000482630	74	0.0675676	0.878378	0.0540541	0.0769231	0.0615385	0.8	0.0724638	7.22222	0.0571429
RAC1_ENST00000356142	164	0.115854	0.878049	0.00609756	0.131944	0.00694444	0.0526316	0.131034	7.2	0.00613497
DUX4L4	90	0.122222	0.877778	0	0.139241	0	0	0.139241	7.18182	0
SDHB	90	0.0555556	0.877778	0.0666667	0.0632911	0.0759494	1.2	0.0588235	7.18182	0.0714286
RARA_ENST00000394081	187	0.112299	0.877005	0.0106952	0.128049	0.0121951	0.0952381	0.126506	7.13043	0.0108108
LRRC67	65	0.123077	0.876923	0	0.140351	0	0	0.140351	7.125	0
NIF3L1_ENST00000409020	73	0.0958904	0.876712	0.0273973	0.109375	0.03125	0.285714	0.106061	7.11111	0.028169
RPL10	73	0.123288	0.876712	0	0.140625	0	0	0.140625	7.11111	0
SH2B3_ENST00000538307	73	0.0821918	0.876712	0.0410959	0.09375	0.046875	0.5	0.0895522	7.11111	0.0428571
RUNX1_ENST00000325074	137	0.0364964	0.875912	0.0875912	0.0416667	0.1	2.4	0.0378788	7.05882	0.096
PPP2R1A	441	0.0997732	0.875283	0.0249433	0.11399	0.0284974	0.25	0.110831	7.01818	0.0255814
TMCO1_ENST00000367881	56	0.0714286	0.875	0.0535714	0.0816327	0.0612245	0.75	0.0769231	7	0.0566038
ACAT1	72	0.0972222	0.875	0.0277778	0.111111	0.031746	0.285714	0.107692	7	0.0285714
ASAH1	72	0.0833333	0.875	0.0416667	0.0952381	0.047619	0.5	0.0909091	7	0.0434783
MIER3	80	0.1125	0.875	0.0125	0.128571	0.0142857	0.111111	0.126761	7	0.0126582
FBXO47	88	0.0681818	0.875	0.0568182	0.0779221	0.0649351	0.833333	0.0731707	7	0.060241
KRTAP1-5	88	0.102273	0.875	0.0227273	0.116883	0.025974	0.222222	0.113924	7	0.0232558
EGFR_ENST00000342916	272	0.113971	0.875	0.0110294	0.130252	0.012605	0.0967742	0.128631	7	0.0111524
ERCC2_ENST00000391945	349	0.114613	0.873926	0.0114613	0.131148	0.0131148	0.1	0.12945	6.93182	0.0115942
C8orf47	79	0.101266	0.873418	0.0253165	0.115942	0.0289855	0.25	0.112676	6.9	0.025974
BRMS1L	63	0.111111	0.873016	0.015873	0.127273	0.0181818	0.142857	0.125	6.875	0.016129
BZW1	63	0.0793651	0.873016	0.047619	0.0909091	0.0545455	0.6	0.0862069	6.875	0.05
RGS16	55	0.109091	0.872727	0.0181818	0.125	0.0208333	0.166667	0.122449	6.85714	0.0185185
RPS24_ENST00000440692	55	0.109091	0.872727	0.0181818	0.125	0.0208333	0.166667	0.122449	6.85714	0.0185185
TXLNA	110	0.118182	0.872727	0.00909091	0.135417	0.0104167	0.0769231	0.134021	6.85714	0.00917431
ERBB3	814	0.100737	0.872236	0.027027	0.115493	0.0309859	0.268293	0.112022	6.82692	0.0277778
MSTO1	78	0.128205	0.871795	0	0.147059	0	0	0.147059	6.8	0
ZNF844	234	0.106838	0.871795	0.0213675	0.122549	0.0245098	0.2	0.119617	6.8	0.0218341
EPB41_ENST00000373797	70	0.114286	0.871429	0.0142857	0.131148	0.0163934	0.125	0.129032	6.77778	0.0144928
TBL1XR1	225	0.0933333	0.871111	0.0355556	0.107143	0.0408163	0.380952	0.102941	6.75862	0.0368664
SOX18	62	0.129032	0.870968	0	0.148148	0	0	0.148148	6.75	0
GOLGA6C_ENST00000300576	93	0.129032	0.870968	0	0.148148	0	0	0.148148	6.75	0
ZNF486	85	0.105882	0.870588	0.0235294	0.121622	0.027027	0.222222	0.118421	6.72727	0.0240964
UBP1	77	0.116883	0.87013	0.012987	0.134328	0.0149254	0.111111	0.132353	6.7	0.0131579
GABPB1_ENST00000220429	69	0.0724638	0.869565	0.057971	0.0833333	0.0666667	0.8	0.078125	6.66667	0.0615385
YAP1_ENST00000282441	153	0.0915033	0.869281	0.0392157	0.105263	0.0451128	0.428571	0.100719	6.65	0.0408163
SSX5	145	0.131034	0.868966	0	0.150794	0	0	0.150794	6.63158	0
KRTAP19-5	61	0.114754	0.868852	0.0163934	0.132075	0.0188679	0.142857	0.12963	6.625	0.0166667
ZNF207	99	0.0505051	0.868687	0.0808081	0.0581395	0.0930233	1.6	0.0531915	6.61538	0.0879121
C9orf84_ENST00000374283	76	0.0921053	0.868421	0.0394737	0.106061	0.0454545	0.428571	0.101449	6.6	0.0410959
JAK3_ENST00000534444	243	0.0658436	0.868313	0.0658436	0.0758294	0.0758294	1	0.0704846	6.59375	0.0704846
MDM2	167	0.0958084	0.868263	0.0359281	0.110345	0.0413793	0.375	0.10596	6.59091	0.0372671
LIPM	53	0.0943396	0.867925	0.0377358	0.108696	0.0434783	0.4	0.104167	6.57143	0.0392157
MAPK9_ENST00000425491	53	0.132075	0.867925	0	0.152174	0	0	0.152174	6.57143	0
ESR1	514	0.105058	0.867704	0.0272374	0.121076	0.0313901	0.259259	0.117391	6.55882	0.028
PIAS2	136	0.110294	0.867647	0.0220588	0.127119	0.0254237	0.2	0.123967	6.55556	0.0225564
RSL1D1	113	0.106195	0.867257	0.0265487	0.122449	0.0306122	0.25	0.118812	6.53333	0.0272727
RECQL4	352	0.110795	0.866477	0.0227273	0.127869	0.0262295	0.205128	0.124601	6.48936	0.0232558
TRAF7	306	0.107843	0.866013	0.0261438	0.124528	0.0301887	0.242424	0.120879	6.46341	0.0268456
TCF12_ENST00000343827	97	0.0515464	0.865979	0.0824742	0.0595238	0.0952381	1.6	0.0543478	6.46154	0.0898876
RARA	216	0.125	0.865741	0.00925926	0.144385	0.0106952	0.0740741	0.142857	6.44828	0.00934579
RRAD	67	0.119403	0.865672	0.0149254	0.137931	0.0172414	0.125	0.135593	6.44444	0.0151515
SCRN3_ENST00000409673	67	0.104478	0.865672	0.0298507	0.12069	0.0344828	0.285714	0.116667	6.44444	0.0307692
C6orf103_ENST00000367488	52	0.0961538	0.865385	0.0384615	0.111111	0.0444444	0.4	0.106383	6.42857	0.04
IK	52	0.115385	0.865385	0.0192308	0.133333	0.0222222	0.166667	0.130435	6.42857	0.0196078
RP11-632K20.1	52	0.0961538	0.865385	0.0384615	0.111111	0.0444444	0.4	0.106383	6.42857	0.04
FLT3	755	0.101987	0.864901	0.0331126	0.117917	0.0382848	0.324675	0.113569	6.40196	0.0342466
CEP44	74	0.108108	0.864865	0.027027	0.125	0.03125	0.25	0.121212	6.4	0.0277778
FGFR3_ENST00000340107	599	0.130217	0.864775	0.00500835	0.150579	0.00579151	0.0384615	0.149712	6.39506	0.00503356
GATA2	303	0.10231	0.864686	0.0330033	0.118321	0.0381679	0.322581	0.113971	6.39024	0.0341297
TNNT1	96	0.125	0.864583	0.0104167	0.144578	0.0120482	0.0833333	0.142857	6.38462	0.0105263
C11orf70	59	0.0677966	0.864407	0.0677966	0.0784314	0.0784314	1	0.0727273	6.375	0.0727273
CDK2	59	0.118644	0.864407	0.0169492	0.137255	0.0196078	0.142857	0.134615	6.375	0.0172414
KIAA1704	59	0.101695	0.864407	0.0338983	0.117647	0.0392157	0.333333	0.113208	6.375	0.0350877
USP17L13	59	0.135593	0.864407	0	0.156863	0	0	0.156863	6.375	0
FGFR2	611	0.106383	0.864157	0.0294599	0.123106	0.0340909	0.276923	0.119048	6.36145	0.0303541
EGFR_ENST00000442591	293	0.122867	0.863481	0.0136519	0.142292	0.0158103	0.111111	0.140078	6.325	0.0138408
HIST1H3B	234	0.115385	0.863248	0.0213675	0.133663	0.0247525	0.185185	0.130435	6.3125	0.0218341
HOXD1	73	0.0958904	0.863014	0.0410959	0.111111	0.047619	0.428571	0.106061	6.3	0.0428571
RCN1	73	0.136986	0.863014	0	0.15873	0	0	0.15873	6.3	0
EZH2	467	0.0792291	0.862955	0.0578158	0.0918114	0.0669975	0.72973	0.0860465	6.29688	0.0613636
YAP1	124	0.0887097	0.862903	0.0483871	0.102804	0.0560748	0.545455	0.0973451	6.29412	0.0508475
GSTM5_ENST00000369812	51	0.117647	0.862745	0.0196078	0.136364	0.0227273	0.166667	0.133333	6.28571	0.02
C7orf72	102	0.0980392	0.862745	0.0392157	0.113636	0.0454545	0.4	0.108696	6.28571	0.0408163
PRSS48_ENST00000455694	58	0.137931	0.862069	0	0.16	0	0	0.16	6.25	0
ZDHHC16	58	0.12069	0.862069	0.0172414	0.14	0.02	0.142857	0.137255	6.25	0.0175439
FH	174	0.091954	0.862069	0.045977	0.106667	0.0533333	0.5	0.101266	6.25	0.0481928
FGFR2_ENST00000357555	435	0.103448	0.862069	0.0344828	0.12	0.04	0.333333	0.115385	6.25	0.0357143
FOXA1	362	0.132597	0.861878	0.00552486	0.153846	0.00641026	0.0416667	0.152866	6.24	0.00555556
KRTAP4-9_ENST00000377734	65	0.123077	0.861538	0.0153846	0.142857	0.0178571	0.125	0.140351	6.22222	0.015625
ZMYM5	65	0.107692	0.861538	0.0307692	0.125	0.0357143	0.285714	0.12069	6.22222	0.031746
KLF1	79	0.139241	0.860759	0	0.161765	0	0	0.161765	6.18182	0
GATA1_ENST00000376665	122	0.122951	0.860656	0.0163934	0.142857	0.0190476	0.133333	0.140187	6.17647	0.0166667
FGFR2_ENST00000369056	430	0.104651	0.860465	0.0348837	0.121622	0.0405405	0.333333	0.116883	6.16667	0.0361446
PSMD4	93	0.107527	0.860215	0.0322581	0.125	0.0375	0.3	0.120482	6.15385	0.0333333
MDM2_ENST00000462284	157	0.101911	0.859873	0.0382166	0.118519	0.0444444	0.375	0.113475	6.13636	0.0397351
FBXW7_ENST00000393956	449	0.00890869	0.859688	0.131403	0.0103627	0.15285	14.75	0.00898876	6.12698	0.151282
TCEAL4	64	0.09375	0.859375	0.046875	0.109091	0.0545455	0.5	0.103448	6.11111	0.0491803
MTA1_ENST00000435036	71	0.126761	0.859155	0.0140845	0.147541	0.0163934	0.111111	0.145161	6.1	0.0142857
PIK3C2G_ENST00000538779	504	0.0912698	0.859127	0.0496032	0.106236	0.0577367	0.543478	0.100437	6.09859	0.0521921
DPYD_ENST00000306031	78	0.141026	0.858974	0	0.164179	0	0	0.164179	6.09091	0
SCRN3	78	0.102564	0.858974	0.0384615	0.119403	0.0447761	0.375	0.114286	6.09091	0.04
AGFG1	92	0.108696	0.858696	0.0326087	0.126582	0.0379747	0.3	0.121951	6.07692	0.0337079
SMO	338	0.112426	0.857988	0.0295858	0.131034	0.0344828	0.263158	0.126667	6.04167	0.0304878
TROAP	190	0.115789	0.857895	0.0263158	0.134969	0.0306748	0.227273	0.130952	6.03704	0.027027
TP53_ENST00000545858	6559	0.00472633	0.857448	0.137826	0.00551209	0.16074	29.1613	0.00474877	6.01497	0.159859
TCTEX1D1	56	0.107143	0.857143	0.0357143	0.125	0.0416667	0.333333	0.12	6	0.037037
TNNI3	56	0.142857	0.857143	0	0.166667	0	0	0.166667	6	0
FUCA1	63	0.126984	0.857143	0.015873	0.148148	0.0185185	0.125	0.145455	6	0.016129
IGFBP3	63	0.126984	0.857143	0.015873	0.148148	0.0185185	0.125	0.145455	6	0.016129
MAPK9	91	0.120879	0.857143	0.021978	0.141026	0.025641	0.181818	0.1375	6	0.0224719
KLF4	217	0.133641	0.857143	0.00921659	0.155914	0.0107527	0.0689655	0.154255	6	0.00930233
RUNX1_ENST00000486278	167	0.0479042	0.856287	0.0958084	0.0559441	0.111888	2	0.0503145	5.95833	0.10596
FGFR2_ENST00000457416	493	0.111562	0.855984	0.0324544	0.130332	0.0379147	0.290909	0.125571	5.94366	0.033543
RRAGB	76	0.118421	0.855263	0.0263158	0.138462	0.0307692	0.222222	0.134328	5.90909	0.027027
KLHL5_ENST00000359687	152	0.118421	0.855263	0.0263158	0.138462	0.0307692	0.222222	0.134328	5.90909	0.027027
ASAH1_ENST00000314146	69	0.101449	0.855072	0.0434783	0.118644	0.0508475	0.428571	0.112903	5.9	0.0454545
GABPB1	69	0.0724638	0.855072	0.0724638	0.0847458	0.0847458	1	0.078125	5.9	0.078125
KBTBD11	69	0.144928	0.855072	0	0.169492	0	0	0.169492	5.9	0
NUCKS1	69	0.101449	0.855072	0.0434783	0.118644	0.0508475	0.428571	0.112903	5.9	0.0454545
SLC38A9_ENST00000539768	69	0.144928	0.855072	0	0.169492	0	0	0.169492	5.9	0
UFSP2	69	0.101449	0.855072	0.0434783	0.118644	0.0508475	0.428571	0.112903	5.9	0.0454545
USP16_ENST00000535828	69	0.115942	0.855072	0.0289855	0.135593	0.0338983	0.25	0.131148	5.9	0.0298507
ZBTB10_ENST00000379091	69	0.101449	0.855072	0.0434783	0.118644	0.0508475	0.428571	0.112903	5.9	0.0454545
MYD88_ENST00000417037	131	0.0992366	0.854962	0.0458015	0.116071	0.0535714	0.461538	0.110169	5.89474	0.048
FGFR2_ENST00000351936	489	0.114519	0.854806	0.0306748	0.133971	0.0358852	0.267857	0.12933	5.88732	0.0316456
IRS2	413	0.138015	0.854722	0.00726392	0.161473	0.00849858	0.0526316	0.160112	5.88333	0.00731707
C3orf71	55	0.145455	0.854545	0	0.170213	0	0	0.170213	5.875	0
CLEC7A	55	0.127273	0.854545	0.0181818	0.148936	0.0212766	0.142857	0.145833	5.875	0.0185185
HOXA4	55	0.145455	0.854545	0	0.170213	0	0	0.170213	5.875	0
SDHD	55	0.0909091	0.854545	0.0545455	0.106383	0.0638298	0.6	0.1	5.875	0.0576923
RAD51	96	0.0833333	0.854167	0.0625	0.097561	0.0731707	0.75	0.0909091	5.85714	0.0666667
RBBP7	96	0.135417	0.854167	0.0104167	0.158537	0.0121951	0.0769231	0.156627	5.85714	0.0105263
NXPE1	144	0.118056	0.854167	0.0277778	0.138211	0.0325203	0.235294	0.133858	5.85714	0.0285714
CHEK1	137	0.10219	0.854015	0.0437956	0.119658	0.0512821	0.428571	0.113821	5.85	0.0458015
FAM55A	137	0.116788	0.854015	0.0291971	0.136752	0.034188	0.25	0.132231	5.85	0.0300752
EZH2_ENST00000350995	410	0.0902439	0.853659	0.0560976	0.105714	0.0657143	0.621622	0.0991957	5.83333	0.0594315
OGT	191	0.125654	0.853403	0.0209424	0.147239	0.0245399	0.166667	0.143713	5.82143	0.0213904
RIT1	109	0.0917431	0.853211	0.0550459	0.107527	0.0645161	0.6	0.10101	5.8125	0.0582524
PPIE	68	0.132353	0.852941	0.0147059	0.155172	0.0172414	0.111111	0.152542	5.8	0.0149254
IST1	61	0.131148	0.852459	0.0163934	0.153846	0.0192308	0.125	0.150943	5.77778	0.0166667
CHD1L_ENST00000369258	122	0.106557	0.852459	0.0409836	0.125	0.0480769	0.384615	0.119266	5.77778	0.042735
HNF1A_ENST00000543427	183	0.10929	0.852459	0.0382514	0.128205	0.0448718	0.35	0.122699	5.77778	0.0397727
LDHAL6A	54	0.12963	0.851852	0.0185185	0.152174	0.0217391	0.142857	0.148936	5.75	0.0188679
PRSS48	54	0.148148	0.851852	0	0.173913	0	0	0.173913	5.75	0
RAD9B_ENST00000392672	54	0.0555556	0.851852	0.0925926	0.0652174	0.108696	1.66667	0.0588235	5.75	0.102041
SPDYA	54	0.12963	0.851852	0.0185185	0.152174	0.0217391	0.142857	0.148936	5.75	0.0188679
ZNF691	54	0.148148	0.851852	0	0.173913	0	0	0.173913	5.75	0
PRKCI	162	0.0987654	0.851852	0.0493827	0.115942	0.057971	0.5	0.109589	5.75	0.0519481
POLG2	101	0.128713	0.851485	0.019802	0.151163	0.0232558	0.153846	0.147727	5.73333	0.020202
NAPG	74	0.0675676	0.851351	0.0810811	0.0793651	0.0952381	1.2	0.0724638	5.72727	0.0882353
KLHL5_ENST00000381930	148	0.121622	0.851351	0.027027	0.142857	0.031746	0.222222	0.138462	5.72727	0.0277778
MAX_ENST00000284165	114	0.0263158	0.850877	0.122807	0.0309278	0.14433	4.66667	0.027027	5.70588	0.14
NPAS3_ENST00000341321	67	0.134328	0.850746	0.0149254	0.157895	0.0175439	0.111111	0.155172	5.7	0.0151515
PPP1R42	67	0.134328	0.850746	0.0149254	0.157895	0.0175439	0.111111	0.155172	5.7	0.0151515
GNA11	288	0.135417	0.850694	0.0138889	0.159184	0.0163265	0.102564	0.156627	5.69767	0.0140845
PHLDA1	87	0.126437	0.850575	0.0229885	0.148649	0.027027	0.181818	0.144737	5.69231	0.0235294
MAX_ENST00000556979	107	0.0186916	0.850467	0.130841	0.021978	0.153846	7	0.0190476	5.6875	0.150538
PREPL	127	0.11811	0.850394	0.0314961	0.138889	0.037037	0.266667	0.133929	5.68421	0.0325203
TSHR	467	0.124197	0.850107	0.0256959	0.146096	0.0302267	0.206897	0.141809	5.67143	0.0263736
MED12_ENST00000333646	567	0.0917108	0.850088	0.0582011	0.107884	0.0684647	0.634615	0.100971	5.67059	0.0617978
DEFB112	60	0.0666667	0.85	0.0833333	0.0784314	0.0980392	1.25	0.0714286	5.66667	0.0909091
MAPK1IP1L	60	0.15	0.85	0	0.176471	0	0	0.176471	5.66667	0
ZSCAN30	60	0.133333	0.85	0.0166667	0.156863	0.0196078	0.125	0.153846	5.66667	0.0169492
TRAFD1	100	0.12	0.85	0.03	0.141176	0.0352941	0.25	0.136364	5.66667	0.0309278
TIMP3	73	0.136986	0.849315	0.0136986	0.16129	0.016129	0.1	0.15873	5.63636	0.0138889
TAF1	444	0.121622	0.849099	0.0292793	0.143236	0.0344828	0.240741	0.138462	5.62687	0.0301624
DLK2	53	0.150943	0.849057	0	0.177778	0	0	0.177778	5.625	0
MXD3_ENST00000423571	53	0.0943396	0.849057	0.0566038	0.111111	0.0666667	0.6	0.104167	5.625	0.06
RP13-395E19.1	53	0.150943	0.849057	0	0.177778	0	0	0.177778	5.625	0
AGFG1_ENST00000409979	86	0.116279	0.848837	0.0348837	0.136986	0.0410959	0.3	0.131579	5.61538	0.0361446
C2orf29	79	0.139241	0.848101	0.0126582	0.164179	0.0149254	0.0909091	0.161765	5.58333	0.0128205
ANGPTL3	92	0.108696	0.847826	0.0434783	0.128205	0.0512821	0.4	0.121951	5.57143	0.0454545
ANKRD62	92	0.076087	0.847826	0.076087	0.0897436	0.0897436	1	0.0823529	5.57143	0.0823529
CCBL2_ENST00000260508	92	0.130435	0.847826	0.0217391	0.153846	0.025641	0.166667	0.15	5.57143	0.0222222
CCDC160	59	0.135593	0.847458	0.0169492	0.16	0.02	0.125	0.156863	5.55556	0.0172414
EGFL7	59	0.118644	0.847458	0.0338983	0.14	0.04	0.285714	0.134615	5.55556	0.0350877
SPDYA_ENST00000334056	59	0.135593	0.847458	0.0169492	0.16	0.02	0.125	0.156863	5.55556	0.0172414
ZBED5	59	0.0677966	0.847458	0.0847458	0.08	0.1	1.25	0.0727273	5.55556	0.0925926
ZBED5_ENST00000432999	59	0.0677966	0.847458	0.0847458	0.08	0.1	1.25	0.0727273	5.55556	0.0925926
NDUFS1	118	0.110169	0.847458	0.0423729	0.13	0.05	0.384615	0.12381	5.55556	0.0442478
REL	177	0.112994	0.847458	0.039548	0.133333	0.0466667	0.35	0.127389	5.55556	0.0411765
BCL2L10	72	0.125	0.847222	0.0277778	0.147541	0.0327869	0.222222	0.142857	5.54545	0.0285714
RNF32	85	0.129412	0.847059	0.0235294	0.152778	0.0277778	0.181818	0.148649	5.53846	0.0240964
IDH3B_ENST00000380851	98	0.142857	0.846939	0.0102041	0.168675	0.0120482	0.0714286	0.166667	5.53333	0.0103093
RCOR2	98	0.122449	0.846939	0.0306122	0.144578	0.0361446	0.25	0.139535	5.53333	0.0315789
C12orf29	52	0.134615	0.846154	0.0192308	0.159091	0.0227273	0.142857	0.155556	5.5	0.0196078
C17orf81_ENST00000396628	52	0.134615	0.846154	0.0192308	0.159091	0.0227273	0.142857	0.155556	5.5	0.0196078
HSD17B7	52	0.153846	0.846154	0	0.181818	0	0	0.181818	5.5	0
MDM4_ENST00000367179	65	0.107692	0.846154	0.0461538	0.127273	0.0545455	0.428571	0.12069	5.5	0.0483871
CWF19L1	78	0.102564	0.846154	0.0512821	0.121212	0.0606061	0.5	0.114286	5.5	0.0540541
STK19_ENST00000375333	78	0.153846	0.846154	0	0.181818	0	0	0.181818	5.5	0
TAF1_ENST00000276072	415	0.127711	0.845783	0.026506	0.150997	0.031339	0.207547	0.146409	5.48438	0.0272277
OGT_ENST00000373719	188	0.132979	0.845745	0.0212766	0.157233	0.0251572	0.16	0.153374	5.48276	0.0217391
DMAP1	97	0.134021	0.845361	0.0206186	0.158537	0.0243902	0.153846	0.154762	5.46667	0.0210526
ITGBL1	194	0.128866	0.845361	0.0257732	0.152439	0.0304878	0.2	0.147929	5.46667	0.026455
BBS4	84	0.142857	0.845238	0.0119048	0.169014	0.0140845	0.0833333	0.166667	5.46154	0.0120482
KLHL5	168	0.125	0.845238	0.0297619	0.147887	0.0352113	0.238095	0.142857	5.46154	0.0306748
TMTC3	155	0.116129	0.845161	0.0387097	0.137405	0.0458015	0.333333	0.131387	5.45833	0.0402685
GOLGA6D	71	0.126761	0.84507	0.028169	0.15	0.0333333	0.222222	0.145161	5.45455	0.0289855
GPR135	71	0.140845	0.84507	0.0140845	0.166667	0.0166667	0.1	0.163934	5.45455	0.0142857
MCU	71	0.112676	0.84507	0.0422535	0.133333	0.05	0.375	0.126984	5.45455	0.0441176
IQCF3	58	0.137931	0.844828	0.0172414	0.163265	0.0204082	0.125	0.16	5.44444	0.0175439
LPGAT1	58	0.103448	0.844828	0.0517241	0.122449	0.0612245	0.5	0.115385	5.44444	0.0545455
IDH3B	103	0.135922	0.84466	0.0194175	0.16092	0.0229885	0.142857	0.157303	5.4375	0.019802
U2SURP	193	0.119171	0.84456	0.0362694	0.141104	0.0429448	0.304348	0.135294	5.43333	0.0376344
IGF1_ENST00000307046	122	0.122951	0.844262	0.0327869	0.145631	0.038835	0.266667	0.140187	5.42105	0.0338983
C11orf61	77	0.142857	0.844156	0.012987	0.169231	0.0153846	0.0909091	0.166667	5.41667	0.0131579
GNAS_ENST00000371100	742	0.132075	0.843666	0.0242588	0.15655	0.028754	0.183673	0.152174	5.39655	0.0248619
ERP29	51	0.137255	0.843137	0.0196078	0.162791	0.0232558	0.142857	0.159091	5.375	0.02
IL20RA_ENST00000367746	51	0.0784314	0.843137	0.0784314	0.0930233	0.0930233	1	0.0851064	5.375	0.0851064
METTL10	51	0.117647	0.843137	0.0392157	0.139535	0.0465116	0.333333	0.133333	5.375	0.0408163
OBFC1	51	0.0980392	0.843137	0.0588235	0.116279	0.0697674	0.6	0.108696	5.375	0.0625
OR11H1	51	0.156863	0.843137	0	0.186047	0	0	0.186047	5.375	0
POFUT1_ENST00000375730	51	0.137255	0.843137	0.0196078	0.162791	0.0232558	0.142857	0.159091	5.375	0.02
RASD1	51	0.137255	0.843137	0.0196078	0.162791	0.0232558	0.142857	0.159091	5.375	0.02
RCCD1	51	0.137255	0.843137	0.0196078	0.162791	0.0232558	0.142857	0.159091	5.375	0.02
SARNP	51	0.117647	0.843137	0.0392157	0.139535	0.0465116	0.333333	0.133333	5.375	0.0408163
ENSG00000174501	274	0.131387	0.843066	0.0255474	0.155844	0.030303	0.194444	0.151261	5.37209	0.0262172
GOLPH3	70	0.114286	0.842857	0.0428571	0.135593	0.0508475	0.375	0.129032	5.36364	0.0447761
TCF12_ENST00000452095	140	0.0785714	0.842857	0.0785714	0.0932203	0.0932203	1	0.0852713	5.36364	0.0852713
STAT5B	248	0.112903	0.842742	0.0443548	0.133971	0.0526316	0.392857	0.127273	5.35897	0.0464135
CYP27B1	89	0.146067	0.842697	0.011236	0.173333	0.0133333	0.0769231	0.171053	5.35714	0.0113636
FEM1C	89	0.134831	0.842697	0.0224719	0.16	0.0266667	0.166667	0.155844	5.35714	0.0229885
ENSG00000180715	57	0.0877193	0.842105	0.0701754	0.104167	0.0833333	0.8	0.0961538	5.33333	0.0754717
PIGL	57	0.122807	0.842105	0.0350877	0.145833	0.0416667	0.285714	0.14	5.33333	0.0363636
KEAP1	652	0.0797546	0.842025	0.0782209	0.0947177	0.0928962	0.980769	0.0866667	5.3301	0.0848586
HNRNPK	120	0.125	0.841667	0.0333333	0.148515	0.039604	0.266667	0.142857	5.31579	0.0344828
ZNF711	221	0.104072	0.841629	0.0542986	0.123656	0.0645161	0.521739	0.116162	5.31429	0.0574163
EPCAM	82	0.109756	0.841463	0.0487805	0.130435	0.057971	0.444444	0.123288	5.30769	0.0512821
TTC34	82	0.158537	0.841463	0	0.188406	0	0	0.188406	5.30769	0
ANKRD28	63	0.15873	0.84127	0	0.188679	0	0	0.188679	5.3	0
LOC349136	63	0.15873	0.84127	0	0.188679	0	0	0.188679	5.3	0
XPO1	346	0.121387	0.84104	0.0375723	0.14433	0.0446735	0.309524	0.138158	5.29091	0.039039
CCBL2_ENST00000370491	88	0.136364	0.840909	0.0227273	0.162162	0.027027	0.166667	0.157895	5.28571	0.0232558
U2AF2	132	0.151515	0.840909	0.00757576	0.18018	0.00900901	0.05	0.178571	5.28571	0.00763359
PMPCB	69	0.130435	0.84058	0.0289855	0.155172	0.0344828	0.222222	0.15	5.27273	0.0298507
RGS3_ENST00000462403	69	0.15942	0.84058	0	0.189655	0	0	0.189655	5.27273	0
CCNE1	138	0.108696	0.84058	0.0507246	0.12931	0.0603448	0.466667	0.121951	5.27273	0.0534351
KMO	144	0.131944	0.840278	0.0277778	0.157025	0.0330579	0.210526	0.152	5.26087	0.0285714
FAM104B	50	0.16	0.84	0	0.190476	0	0	0.190476	5.25	0
HIST1H4H	50	0.16	0.84	0	0.190476	0	0	0.190476	5.25	0
SSX3_ENST00000376893	75	0.16	0.84	0	0.190476	0	0	0.190476	5.25	0
SGIP1_ENST00000371039	175	0.114286	0.84	0.0457143	0.136054	0.0544218	0.4	0.129032	5.25	0.0479042
TP53_ENST00000455263	10059	0.011532	0.839547	0.148921	0.0137359	0.177383	12.9138	0.0116665	5.23234	0.17498
ATF5	81	0.160494	0.839506	0	0.191176	0	0	0.191176	5.23077	0
SH3YL1_ENST00000405430	81	0.123457	0.839506	0.037037	0.147059	0.0441176	0.3	0.140845	5.23077	0.0384615
ACP6_ENST00000392988	56	0.125	0.839286	0.0357143	0.148936	0.0425532	0.285714	0.142857	5.22222	0.037037
DNAJB14	56	0.0714286	0.839286	0.0892857	0.0851064	0.106383	1.25	0.0769231	5.22222	0.0980392
KLF2	56	0.142857	0.839286	0.0178571	0.170213	0.0212766	0.125	0.166667	5.22222	0.0181818
LDHA	56	0.125	0.839286	0.0357143	0.148936	0.0425532	0.285714	0.142857	5.22222	0.037037
SNUPN	56	0.107143	0.839286	0.0535714	0.12766	0.0638298	0.5	0.12	5.22222	0.0566038
ANKUB1	87	0.149425	0.83908	0.0114943	0.178082	0.0136986	0.0769231	0.175676	5.21429	0.0116279
RHOB	87	0.126437	0.83908	0.0344828	0.150685	0.0410959	0.272727	0.144737	5.21429	0.0357143
CXXC1	174	0.132184	0.83908	0.0287356	0.157534	0.0342466	0.217391	0.152318	5.21429	0.0295858
RET	1019	0.133464	0.839058	0.0274779	0.159064	0.0327485	0.205882	0.15402	5.21341	0.0282543
C3orf38	62	0.129032	0.83871	0.0322581	0.153846	0.0384615	0.25	0.148148	5.2	0.0333333
CDKL4_ENST00000378803	62	0.129032	0.83871	0.0322581	0.153846	0.0384615	0.25	0.148148	5.2	0.0333333
SAMD14	93	0.150538	0.83871	0.0107527	0.179487	0.0128205	0.0714286	0.177215	5.2	0.0108696
CHEK2_ENST00000382580	155	0.0580645	0.83871	0.103226	0.0692308	0.123077	1.77778	0.0616438	5.2	0.115108
SMC1A	248	0.125	0.83871	0.0362903	0.149038	0.0432692	0.290323	0.142857	5.2	0.0376569
ATRN_ENST00000446916	68	0.117647	0.838235	0.0441176	0.140351	0.0526316	0.375	0.133333	5.18182	0.0461538
C2orf69	68	0.132353	0.838235	0.0294118	0.157895	0.0350877	0.222222	0.152542	5.18182	0.030303
H2BFM_ENST00000243297	68	0.147059	0.838235	0.0147059	0.175439	0.0175439	0.1	0.172414	5.18182	0.0149254
SH2D1A	68	0.117647	0.838235	0.0441176	0.140351	0.0526316	0.375	0.133333	5.18182	0.0461538
GNE	136	0.139706	0.838235	0.0220588	0.166667	0.0263158	0.157895	0.162393	5.18182	0.0225564
NT5C2	136	0.139706	0.838235	0.0220588	0.166667	0.0263158	0.157895	0.162393	5.18182	0.0225564
CHD1L	173	0.121387	0.83815	0.0404624	0.144828	0.0482759	0.333333	0.138158	5.17857	0.0421687
PARN_ENST00000437198	105	0.104762	0.838095	0.0571429	0.125	0.0681818	0.545455	0.117021	5.17647	0.0606061
POTEM_ENST00000551509	142	0.140845	0.838028	0.0211268	0.168067	0.0252101	0.15	0.163934	5.17391	0.0215827
BRIP1	395	0.106329	0.837975	0.0556962	0.126888	0.0664653	0.52381	0.11898	5.17188	0.0589812
DENND4C	253	0.142292	0.837945	0.0197628	0.169811	0.0235849	0.138889	0.165899	5.17073	0.0201613
PBX2	74	0.148649	0.837838	0.0135135	0.177419	0.016129	0.0909091	0.174603	5.16667	0.0136986
TRIM48	228	0.157895	0.837719	0.00438596	0.188482	0.0052356	0.0277778	0.1875	5.16216	0.00440529
C20orf194_ENST00000453730	80	0.1375	0.8375	0.025	0.164179	0.0298507	0.181818	0.15942	5.15385	0.025641
HMBS	80	0.15	0.8375	0.0125	0.179104	0.0149254	0.0833333	0.176471	5.15385	0.0126582
TMEM184C	80	0.1375	0.8375	0.025	0.164179	0.0298507	0.181818	0.15942	5.15385	0.025641
TP53_ENST00000420246	9776	0.0126841	0.837152	0.150164	0.0151515	0.179374	11.8387	0.0128471	5.1407	0.176697
DNAJB1	92	0.163043	0.836957	0	0.194805	0	0	0.194805	5.13333	0
BRIP1_ENST00000259008	386	0.108808	0.836788	0.0544041	0.130031	0.0650155	0.5	0.122093	5.12698	0.0575342
MSL3_ENST00000337339	98	0.132653	0.836735	0.0306122	0.158537	0.0365854	0.230769	0.152941	5.125	0.0315789
EGFR_ENST00000344576	514	0.14786	0.836576	0.0155642	0.176744	0.0186047	0.105263	0.173516	5.11905	0.0158103
MANEA	104	0.0961538	0.836538	0.0673077	0.114943	0.0804598	0.7	0.106383	5.11765	0.0721649
CASP12	55	0.163636	0.836364	0	0.195652	0	0	0.195652	5.11111	0
CCDC132_ENST00000544910	55	0.0909091	0.836364	0.0727273	0.108696	0.0869565	0.8	0.1	5.11111	0.0784314
CLDN2	55	0.145455	0.836364	0.0181818	0.173913	0.0217391	0.125	0.170213	5.11111	0.0185185
CYB5R3	55	0.163636	0.836364	0	0.195652	0	0	0.195652	5.11111	0
IQCF3_ENST00000456080	55	0.145455	0.836364	0.0181818	0.173913	0.0217391	0.125	0.170213	5.11111	0.0185185
MBP_ENST00000382582	55	0.163636	0.836364	0	0.195652	0	0	0.195652	5.11111	0
PBX1_ENST00000540246	55	0.163636	0.836364	0	0.195652	0	0	0.195652	5.11111	0
PURB	55	0.163636	0.836364	0	0.195652	0	0	0.195652	5.11111	0
DGKB_ENST00000406247	61	0.0983607	0.836066	0.0655738	0.117647	0.0784314	0.666667	0.109091	5.1	0.0701754
ENSG00000172901	61	0.131148	0.836066	0.0327869	0.156863	0.0392157	0.25	0.150943	5.1	0.0338983
SGIP1_ENST00000435165	61	0.0655738	0.836066	0.0983607	0.0784314	0.117647	1.5	0.0701754	5.1	0.109091
TRIM64B	61	0.163934	0.836066	0	0.196078	0	0	0.196078	5.1	0
ANKRD56	122	0.139344	0.836066	0.0245902	0.166667	0.0294118	0.176471	0.161905	5.1	0.0252101
PIAS2_ENST00000324794	122	0.139344	0.836066	0.0245902	0.166667	0.0294118	0.176471	0.161905	5.1	0.0252101
C9orf100_ENST00000378387	67	0.164179	0.835821	0	0.196429	0	0	0.196429	5.09091	0
TCEB3CL2	67	0.104478	0.835821	0.0597015	0.125	0.0714286	0.571429	0.116667	5.09091	0.0634921
GNE_ENST00000396594	134	0.141791	0.835821	0.0223881	0.169643	0.0267857	0.157895	0.165217	5.09091	0.0229008
MAPK1	146	0.136986	0.835616	0.0273973	0.163934	0.0327869	0.2	0.15873	5.08333	0.028169
RAD50_ENST00000265335	383	0.0861619	0.835509	0.078329	0.103125	0.09375	0.909091	0.0942857	5.07937	0.0849858
TRIM48_ENST00000417545	231	0.155844	0.835498	0.00865801	0.186528	0.0103627	0.0555556	0.184615	5.07895	0.00873362
NUP43	85	0.117647	0.835294	0.0470588	0.140845	0.056338	0.4	0.133333	5.07143	0.0493827
IFT172_ENST00000416524	91	0.142857	0.835165	0.021978	0.171053	0.0263158	0.153846	0.166667	5.06667	0.0224719
PGM3	91	0.153846	0.835165	0.010989	0.184211	0.0131579	0.0714286	0.181818	5.06667	0.0111111
RAF1	279	0.125448	0.835125	0.0394265	0.150215	0.0472103	0.314286	0.143443	5.06522	0.0410448
RAD51B_ENST00000488612	97	0.14433	0.835052	0.0206186	0.17284	0.0246914	0.142857	0.168675	5.0625	0.0210526
N4BP2L2	103	0.135922	0.834951	0.0291262	0.162791	0.0348837	0.214286	0.157303	5.05882	0.03
PARN	109	0.110092	0.834862	0.0550459	0.131868	0.0659341	0.5	0.123711	5.05556	0.0582524
SAG_ENST00000409110	109	0.137615	0.834862	0.0275229	0.164835	0.032967	0.2	0.159574	5.05556	0.0283019
TRIM23	109	0.12844	0.834862	0.0366972	0.153846	0.043956	0.285714	0.147368	5.05556	0.0380952
ZNF354B	109	0.12844	0.834862	0.0366972	0.153846	0.043956	0.285714	0.147368	5.05556	0.0380952
CDC23	115	0.156522	0.834783	0.00869565	0.1875	0.0104167	0.0555556	0.185567	5.05263	0.00877193
CHEK2	242	0.0743802	0.834711	0.0909091	0.0891089	0.108911	1.22222	0.0803571	5.05	0.1
TCF12_ENST00000438423	139	0.0791367	0.834532	0.0863309	0.0948276	0.103448	1.09091	0.0859375	5.04348	0.0944882
BCL6	308	0.133117	0.834416	0.0324675	0.159533	0.0389105	0.243902	0.153558	5.03922	0.033557
MDM4	157	0.127389	0.834395	0.0382166	0.152672	0.0458015	0.3	0.145985	5.03846	0.0397351
TP53_ENST00000413465	7555	0.0108537	0.83415	0.154997	0.0130117	0.185814	14.2805	0.0109728	5.02953	0.183427
DIS3	313	0.111821	0.833866	0.0543131	0.1341	0.0651341	0.485714	0.125899	5.01923	0.0574324
ACRV1	54	0.12963	0.833333	0.037037	0.155556	0.0444444	0.285714	0.148936	5	0.0384615
C9orf102_ENST00000407474	54	0.148148	0.833333	0.0185185	0.177778	0.0222222	0.125	0.173913	5	0.0188679
KCNIP2	54	0.166667	0.833333	0	0.2	0	0	0.2	5	0
MCU_ENST00000357157	54	0.111111	0.833333	0.0555556	0.133333	0.0666667	0.5	0.125	5	0.0588235
PSMB8	54	0.148148	0.833333	0.0185185	0.177778	0.0222222	0.125	0.173913	5	0.0188679
MPZL2	60	0.133333	0.833333	0.0333333	0.16	0.04	0.25	0.153846	5	0.0344828
POLB	60	0.116667	0.833333	0.05	0.14	0.06	0.428571	0.132075	5	0.0526316
RNASE11	60	0.1	0.833333	0.0666667	0.12	0.08	0.666667	0.111111	5	0.0714286
ZNF484_ENST00000395506	60	0.116667	0.833333	0.05	0.14	0.06	0.428571	0.132075	5	0.0526316
COQ2	66	0.166667	0.833333	0	0.2	0	0	0.2	5	0
FAM200B	66	0.106061	0.833333	0.0606061	0.127273	0.0727273	0.571429	0.118644	5	0.0645161
FAM200B_ENST00000422728	66	0.106061	0.833333	0.0606061	0.127273	0.0727273	0.571429	0.118644	5	0.0645161
RUFY1_ENST00000377001	66	0.151515	0.833333	0.0151515	0.181818	0.0181818	0.1	0.178571	5	0.0153846
TERF2IP	66	0.136364	0.833333	0.030303	0.163636	0.0363636	0.222222	0.157895	5	0.03125
TXNRD3	66	0.166667	0.833333	0	0.2	0	0	0.2	5	0
ZNF24	66	0.136364	0.833333	0.030303	0.163636	0.0363636	0.222222	0.157895	5	0.03125
RP11-1286E23.13	72	0.152778	0.833333	0.0138889	0.183333	0.0166667	0.0909091	0.180328	5	0.0140845
RNF32_ENST00000343665	78	0.141026	0.833333	0.025641	0.169231	0.0307692	0.181818	0.164179	5	0.0263158
SH3YL1_ENST00000356150	78	0.128205	0.833333	0.0384615	0.153846	0.0461538	0.3	0.147059	5	0.04
GAPVD1_ENST00000394104	84	0.107143	0.833333	0.0595238	0.128571	0.0714286	0.555556	0.12	5	0.0632911
TCF7L2_ENST00000542695	96	0.0729167	0.833333	0.09375	0.0875	0.1125	1.28571	0.0786517	5	0.103448
ZDHHC15	96	0.135417	0.833333	0.03125	0.1625	0.0375	0.230769	0.156627	5	0.0322581
TAF1_ENST00000449580	370	0.137838	0.832432	0.0297297	0.165584	0.0357143	0.215686	0.159875	4.96774	0.0306407
DDX17_ENST00000381633	143	0.125874	0.832168	0.041958	0.151261	0.0504202	0.333333	0.144	4.95833	0.0437956
MCMDC2	143	0.111888	0.832168	0.0559441	0.134454	0.0672269	0.5	0.125984	4.95833	0.0592593
MCMDC2_ENST00000422365	143	0.111888	0.832168	0.0559441	0.134454	0.0672269	0.5	0.125984	4.95833	0.0592593
C8orf45	137	0.0948905	0.832117	0.0729927	0.114035	0.0877193	0.769231	0.104839	4.95652	0.0787402
PHACTR2	131	0.137405	0.832061	0.0305344	0.165138	0.0366972	0.222222	0.159292	4.95455	0.0314961
USP8	238	0.121849	0.831933	0.0462185	0.146465	0.0555556	0.37931	0.138756	4.95	0.0484581
NOTCH4	785	0.119745	0.831847	0.0484076	0.143951	0.058193	0.404255	0.136035	4.94697	0.0508701
LARGE_ENST00000452586	107	0.168224	0.831776	0	0.202247	0	0	0.202247	4.94444	0
CYP39A1	101	0.118812	0.831683	0.049505	0.142857	0.0595238	0.416667	0.134831	4.94118	0.0520833
RBM25	196	0.137755	0.831633	0.0306122	0.165644	0.0368098	0.222222	0.159763	4.93939	0.0315789
SMEK1	95	0.136842	0.831579	0.0315789	0.164557	0.0379747	0.230769	0.158537	4.9375	0.0326087
UBXN7	95	0.157895	0.831579	0.0105263	0.189873	0.0126582	0.0666667	0.1875	4.9375	0.0106383
C14orf93	83	0.120482	0.831325	0.0481928	0.144928	0.057971	0.4	0.136986	4.92857	0.0506329
PRAMEF20	83	0.13253	0.831325	0.0361446	0.15942	0.0434783	0.272727	0.152778	4.92857	0.0375
BARD1	243	0.111111	0.831276	0.0576132	0.133663	0.0693069	0.518519	0.125	4.92683	0.0611354
TCF12	154	0.0779221	0.831169	0.0909091	0.09375	0.109375	1.16667	0.084507	4.92308	0.1
MPL	296	0.121622	0.831081	0.0472973	0.146341	0.0569106	0.388889	0.138462	4.92	0.0496454
SH3D21	71	0.169014	0.830986	0	0.20339	0	0	0.20339	4.91667	0
CDKN2C	65	0.0153846	0.830769	0.153846	0.0185185	0.185185	10	0.015625	4.90909	0.181818
GSTO2	65	0.107692	0.830769	0.0615385	0.12963	0.0740741	0.571429	0.12069	4.90909	0.0655738
KDSR	65	0.138462	0.830769	0.0307692	0.166667	0.037037	0.222222	0.160714	4.90909	0.031746
NUPL2	65	0.153846	0.830769	0.0153846	0.185185	0.0185185	0.1	0.181818	4.90909	0.015625
SNAI1	65	0.153846	0.830769	0.0153846	0.185185	0.0185185	0.1	0.181818	4.90909	0.015625
FBXO11	195	0.138462	0.830769	0.0307692	0.166667	0.037037	0.222222	0.160714	4.90909	0.031746
PPHLN1_ENST00000432191	124	0.129032	0.830645	0.0403226	0.15534	0.0485437	0.3125	0.148148	4.90476	0.0420168
FKBP3	59	0.101695	0.830508	0.0677966	0.122449	0.0816327	0.666667	0.113208	4.9	0.0727273
GDE1	59	0.135593	0.830508	0.0338983	0.163265	0.0408163	0.25	0.156863	4.9	0.0350877
LGALS9B	59	0.169492	0.830508	0	0.204082	0	0	0.204082	4.9	0
G3BP2	112	0.125	0.830357	0.0446429	0.150538	0.0537634	0.357143	0.142857	4.89474	0.046729
BUB3	53	0.150943	0.830189	0.0188679	0.181818	0.0227273	0.125	0.177778	4.88889	0.0192308
C11orf46	53	0.132075	0.830189	0.0377358	0.159091	0.0454545	0.285714	0.152174	4.88889	0.0392157
C11orf85	53	0.150943	0.830189	0.0188679	0.181818	0.0227273	0.125	0.177778	4.88889	0.0192308
CDKN2B	53	0.169811	0.830189	0	0.204545	0	0	0.204545	4.88889	0
CNOT7	53	0.169811	0.830189	0	0.204545	0	0	0.204545	4.88889	0
LYPLAL1	53	0.169811	0.830189	0	0.204545	0	0	0.204545	4.88889	0
PIH1D2	53	0.150943	0.830189	0.0188679	0.181818	0.0227273	0.125	0.177778	4.88889	0.0192308
POTEB_ENST00000439682	53	0.169811	0.830189	0	0.204545	0	0	0.204545	4.88889	0
PRSS3_ENST00000429677	53	0.150943	0.830189	0.0188679	0.181818	0.0227273	0.125	0.177778	4.88889	0.0192308
RWDD4	53	0.150943	0.830189	0.0188679	0.181818	0.0227273	0.125	0.177778	4.88889	0.0192308
SMUG1	53	0.0754717	0.830189	0.0943396	0.0909091	0.113636	1.25	0.0816327	4.88889	0.104167
ULBP3	53	0.150943	0.830189	0.0188679	0.181818	0.0227273	0.125	0.177778	4.88889	0.0192308
SAG	106	0.141509	0.830189	0.0283019	0.170455	0.0340909	0.2	0.164835	4.88889	0.0291262
PCYT1B	94	0.148936	0.829787	0.0212766	0.179487	0.025641	0.142857	0.175	4.875	0.0217391
SLC4A10_ENST00000272716	94	0.159574	0.829787	0.0106383	0.192308	0.0128205	0.0666667	0.189873	4.875	0.0107527
BARD1_ENST00000260947	235	0.114894	0.829787	0.0553191	0.138462	0.0666667	0.481481	0.129808	4.875	0.0585586
ENPP4	135	0.140741	0.82963	0.0296296	0.169643	0.0357143	0.210526	0.163793	4.86957	0.0305344
RAF1_ENST00000442415	270	0.12963	0.82963	0.0407407	0.15625	0.0491071	0.314286	0.148936	4.86957	0.042471
EPS15_ENST00000396122	88	0.113636	0.829545	0.0568182	0.136986	0.0684932	0.5	0.128205	4.86667	0.060241
RNF19A	176	0.147727	0.829545	0.0227273	0.178082	0.0273973	0.153846	0.173333	4.86667	0.0232558
ETV1	264	0.117424	0.829545	0.0530303	0.141553	0.0639269	0.451613	0.133047	4.86667	0.056
ETF1	82	0.146341	0.829268	0.0243902	0.176471	0.0294118	0.166667	0.171429	4.85714	0.025
MAPK11	82	0.121951	0.829268	0.0487805	0.147059	0.0588235	0.4	0.138889	4.85714	0.0512821
DICER1	808	0.111386	0.829208	0.0594059	0.134328	0.0716418	0.533333	0.125348	4.85507	0.0631579
RALB	76	0.157895	0.828947	0.0131579	0.190476	0.015873	0.0833333	0.1875	4.84615	0.0133333
ZFP37_ENST00000553380	152	0.138158	0.828947	0.0328947	0.166667	0.0396825	0.238095	0.160305	4.84615	0.0340136
NTRK2_ENST00000304053	228	0.140351	0.828947	0.0307018	0.169312	0.037037	0.21875	0.163265	4.84615	0.0316742
GTF2E1	111	0.144144	0.828829	0.027027	0.173913	0.0326087	0.1875	0.168421	4.84211	0.0277778
HNRNPA2B1	111	0.0990991	0.828829	0.0720721	0.119565	0.0869565	0.727273	0.11	4.84211	0.0776699
HNRNPA2B1_ENST00000354667	111	0.0990991	0.828829	0.0720721	0.119565	0.0869565	0.727273	0.11	4.84211	0.0776699
TGFBR2_ENST00000359013	397	0.0629723	0.828715	0.108312	0.0759878	0.130699	1.72	0.0672043	4.83824	0.121469
GDF11	70	0.142857	0.828571	0.0285714	0.172414	0.0344828	0.2	0.166667	4.83333	0.0294118
TEX9	70	0.0857143	0.828571	0.0857143	0.103448	0.103448	1	0.09375	4.83333	0.09375
TPK1	70	0.128571	0.828571	0.0428571	0.155172	0.0517241	0.333333	0.147541	4.83333	0.0447761
RCOR3	99	0.141414	0.828283	0.030303	0.170732	0.0365854	0.214286	0.164706	4.82353	0.03125
ARHGAP40	64	0.171875	0.828125	0	0.207547	0	0	0.207547	4.81818	0
HSD11B1L	64	0.171875	0.828125	0	0.207547	0	0	0.207547	4.81818	0
ZNF711_ENST00000373165	221	0.117647	0.828054	0.0542986	0.142077	0.0655738	0.461538	0.133333	4.81579	0.0574163
CCDC35	122	0.147541	0.827869	0.0245902	0.178218	0.029703	0.166667	0.173077	4.80952	0.0252101
C12orf60	58	0.137931	0.827586	0.0344828	0.166667	0.0416667	0.25	0.16	4.8	0.0357143
PPTC7	58	0.0862069	0.827586	0.0862069	0.104167	0.104167	1	0.0943396	4.8	0.0943396
AUP1	87	0.16092	0.827586	0.0114943	0.194444	0.0138889	0.0714286	0.191781	4.8	0.0116279
C4orf40	87	0.149425	0.827586	0.0229885	0.180556	0.0277778	0.153846	0.175676	4.8	0.0235294
HAUS3	87	0.0689655	0.827586	0.103448	0.0833333	0.125	1.5	0.0740741	4.8	0.115385
MFN2_ENST00000376337	87	0.16092	0.827586	0.0114943	0.194444	0.0138889	0.0714286	0.191781	4.8	0.0116279
SOX4	87	0.16092	0.827586	0.0114943	0.194444	0.0138889	0.0714286	0.191781	4.8	0.0116279
UTP15	87	0.16092	0.827586	0.0114943	0.194444	0.0138889	0.0714286	0.191781	4.8	0.0116279
CDKAL1	110	0.154545	0.827273	0.0181818	0.186813	0.021978	0.117647	0.182796	4.78947	0.0185185
CCDC79	81	0.123457	0.82716	0.0493827	0.149254	0.0597015	0.4	0.140845	4.78571	0.0519481
MIER1_ENST00000357692	81	0.148148	0.82716	0.0246914	0.179104	0.0298507	0.166667	0.173913	4.78571	0.0253165
ZNF398_ENST00000540950	81	0.160494	0.82716	0.0123457	0.19403	0.0149254	0.0769231	0.191176	4.78571	0.0125
SLC14A1_ENST00000436407	133	0.142857	0.827068	0.0300752	0.172727	0.0363636	0.210526	0.166667	4.78261	0.0310078
BRIX1	52	0.134615	0.826923	0.0384615	0.162791	0.0465116	0.285714	0.155556	4.77778	0.04
CAPNS2	52	0.173077	0.826923	0	0.209302	0	0	0.209302	4.77778	0
MED6	52	0.0769231	0.826923	0.0961538	0.0930233	0.116279	1.25	0.0833333	4.77778	0.106383
TAF11	52	0.153846	0.826923	0.0192308	0.186047	0.0232558	0.125	0.181818	4.77778	0.0196078
ZNF705A	52	0.153846	0.826923	0.0192308	0.186047	0.0232558	0.125	0.181818	4.77778	0.0196078
PIK3R3	156	0.0705128	0.826923	0.102564	0.0852713	0.124031	1.45455	0.0758621	4.77778	0.114286
NTRK2_ENST00000395882	179	0.145251	0.826816	0.027933	0.175676	0.0337838	0.192308	0.169935	4.77419	0.0287356
PKN2	173	0.104046	0.82659	0.0693642	0.125874	0.0839161	0.666667	0.116129	4.76667	0.0745342
AXL	467	0.149893	0.826552	0.0235546	0.181347	0.0284974	0.157143	0.176322	4.76543	0.0241228
CDKL3_ENST00000265334	98	0.142857	0.826531	0.0306122	0.17284	0.037037	0.214286	0.166667	4.76471	0.0315789
AFP	121	0.14876	0.826446	0.0247934	0.18	0.03	0.166667	0.174757	4.7619	0.0254237
KPNA5	121	0.132231	0.826446	0.0413223	0.16	0.05	0.3125	0.152381	4.7619	0.0431034
RIOK3	121	0.165289	0.826446	0.00826446	0.2	0.01	0.05	0.19802	4.7619	0.00833333
VWC2L	121	0.140496	0.826446	0.0330579	0.17	0.04	0.235294	0.163462	4.7619	0.034188
RAB19	69	0.173913	0.826087	0	0.210526	0	0	0.210526	4.75	0
RAB5C	69	0.130435	0.826087	0.0434783	0.157895	0.0526316	0.333333	0.15	4.75	0.0454545
RAD51D	69	0.130435	0.826087	0.0434783	0.157895	0.0526316	0.333333	0.15	4.75	0.0454545
RMND1	69	0.144928	0.826087	0.0289855	0.175439	0.0350877	0.2	0.169492	4.75	0.0298507
VTCN1_ENST00000359008	69	0.144928	0.826087	0.0289855	0.175439	0.0350877	0.2	0.169492	4.75	0.0298507
PCYT1B_ENST00000379145	92	0.152174	0.826087	0.0217391	0.184211	0.0263158	0.142857	0.179487	4.75	0.0222222
ARHGAP11A	138	0.115942	0.826087	0.057971	0.140351	0.0701754	0.5	0.131148	4.75	0.0615385
TXNRD1_ENST00000525566	109	0.12844	0.825688	0.0458716	0.155556	0.0555556	0.357143	0.147368	4.73684	0.0480769
MRS2	86	0.116279	0.825581	0.0581395	0.140845	0.0704225	0.5	0.131579	4.73333	0.0617284
PDZD3	86	0.139535	0.825581	0.0348837	0.169014	0.0422535	0.25	0.162162	4.73333	0.0361446
SSX3	86	0.174419	0.825581	0	0.211268	0	0	0.211268	4.73333	0
UHMK1_ENST00000489294	86	0.127907	0.825581	0.0465116	0.15493	0.056338	0.363636	0.146667	4.73333	0.0487805
ZFP2	149	0.120805	0.825503	0.0536913	0.146341	0.0650407	0.444444	0.137405	4.73077	0.0567376
CECR1_ENST00000330232	63	0.111111	0.825397	0.0634921	0.134615	0.0769231	0.571429	0.125	4.72727	0.0677966
DEFB125	63	0.111111	0.825397	0.0634921	0.134615	0.0769231	0.571429	0.125	4.72727	0.0677966
DNAJA2	63	0.142857	0.825397	0.031746	0.173077	0.0384615	0.222222	0.166667	4.72727	0.0327869
OSBPL9_ENST00000530544	63	0.15873	0.825397	0.015873	0.192308	0.0192308	0.1	0.188679	4.72727	0.016129
NONO	126	0.103175	0.825397	0.0714286	0.125	0.0865385	0.692308	0.115044	4.72727	0.0769231
ADAM10	143	0.153846	0.825175	0.020979	0.186441	0.0254237	0.136364	0.181818	4.72	0.0214286
BTNL3	143	0.167832	0.825175	0.00699301	0.20339	0.00847458	0.0416667	0.201681	4.72	0.00704225
KLK15	143	0.167832	0.825175	0.00699301	0.20339	0.00847458	0.0416667	0.201681	4.72	0.00704225
AKD1	80	0.125	0.825	0.05	0.151515	0.0606061	0.4	0.142857	4.71429	0.0526316
AKD1_ENST00000341338	80	0.1375	0.825	0.0375	0.166667	0.0454545	0.272727	0.15942	4.71429	0.038961
EYA3	80	0.1375	0.825	0.0375	0.166667	0.0454545	0.272727	0.15942	4.71429	0.038961
HIST1H4D	80	0.1625	0.825	0.0125	0.19697	0.0151515	0.0769231	0.19403	4.71429	0.0126582
PIP5KL1_ENST00000388747	80	0.175	0.825	0	0.212121	0	0	0.212121	4.71429	0
KLHL7	120	0.125	0.825	0.05	0.151515	0.0606061	0.4	0.142857	4.71429	0.0526316
PTPRU_ENST00000323874	120	0.175	0.825	0	0.212121	0	0	0.212121	4.71429	0
SUFU	160	0.1375	0.825	0.0375	0.166667	0.0454545	0.272727	0.15942	4.71429	0.038961
CPSF6	137	0.124088	0.824818	0.0510949	0.150442	0.0619469	0.411765	0.141667	4.70833	0.0538462
CPSF6_ENST00000435070	137	0.124088	0.824818	0.0510949	0.150442	0.0619469	0.411765	0.141667	4.70833	0.0538462
RIOK2_ENST00000508447	97	0.123711	0.824742	0.0515464	0.15	0.0625	0.416667	0.141176	4.70588	0.0543478
PIK3C2G	713	0.12202	0.824684	0.0532959	0.147959	0.0646259	0.436782	0.138978	4.704	0.0562963
MYC	308	0.159091	0.824675	0.0162338	0.192913	0.019685	0.102041	0.189189	4.7037	0.0165017
CCNA2	57	0.175439	0.824561	0	0.212766	0	0	0.212766	4.7	0
ELOVL1	57	0.157895	0.824561	0.0175439	0.191489	0.0212766	0.111111	0.1875	4.7	0.0178571
GAPDH	57	0.157895	0.824561	0.0175439	0.191489	0.0212766	0.111111	0.1875	4.7	0.0178571
PDC	57	0.157895	0.824561	0.0175439	0.191489	0.0212766	0.111111	0.1875	4.7	0.0178571
SLC39A2	57	0.175439	0.824561	0	0.212766	0	0	0.212766	4.7	0
THYN1	57	0.157895	0.824561	0.0175439	0.191489	0.0212766	0.111111	0.1875	4.7	0.0178571
GALNTL5	131	0.129771	0.824427	0.0458015	0.157407	0.0555556	0.352941	0.149123	4.69565	0.048
KDM5A	541	0.101664	0.824399	0.0739372	0.123318	0.0896861	0.727273	0.113169	4.69474	0.0798403
KDM5A_ENST00000399788	541	0.101664	0.824399	0.0739372	0.123318	0.0896861	0.727273	0.113169	4.69474	0.0798403
CSDA	74	0.162162	0.824324	0.0135135	0.196721	0.0163934	0.0833333	0.193548	4.69231	0.0136986
TRAM1	74	0.162162	0.824324	0.0135135	0.196721	0.0163934	0.0833333	0.193548	4.69231	0.0136986
MGAT4C_ENST00000393205	222	0.148649	0.824324	0.027027	0.180328	0.0327869	0.181818	0.174603	4.69231	0.0277778
SRSF2_ENST00000359995	91	0.142857	0.824176	0.032967	0.173333	0.04	0.230769	0.166667	4.6875	0.0340909
THOC1	91	0.142857	0.824176	0.032967	0.173333	0.04	0.230769	0.166667	4.6875	0.0340909
MTOR	1126	0.133215	0.824156	0.0426288	0.161638	0.0517241	0.32	0.153689	4.68687	0.0445269
NTRK2_ENST00000376214	381	0.131234	0.824147	0.0446194	0.159236	0.0541401	0.34	0.151057	4.68657	0.0467033
SUZ12	199	0.0753769	0.824121	0.100503	0.0914634	0.121951	1.33333	0.0815217	4.68571	0.111732
PLEKHS1	108	0.138889	0.824074	0.037037	0.168539	0.0449438	0.266667	0.16129	4.68421	0.0384615
STAM2	108	0.12963	0.824074	0.0462963	0.157303	0.0561798	0.357143	0.148936	4.68421	0.0485437
MYC_ENST00000377970	324	0.160494	0.824074	0.0154321	0.194757	0.0187266	0.0961538	0.191176	4.68421	0.015674
RAD50	341	0.0909091	0.824047	0.085044	0.11032	0.103203	0.935484	0.1	4.68333	0.0929487
MCMDC2_ENST00000313616	125	0.12	0.824	0.056	0.145631	0.0679612	0.466667	0.136364	4.68182	0.059322
NTRK2	392	0.132653	0.82398	0.0433673	0.160991	0.0526316	0.326923	0.152941	4.68116	0.0453333
SOX2	142	0.147887	0.823944	0.028169	0.179487	0.034188	0.190476	0.173554	4.68	0.0289855
CFHR3	159	0.119497	0.823899	0.0566038	0.145038	0.0687023	0.473684	0.135714	4.67857	0.06
DDX17	159	0.132075	0.823899	0.0440252	0.160305	0.0534351	0.333333	0.152174	4.67857	0.0460526
GNAQ	295	0.125424	0.823729	0.0508475	0.152263	0.0617284	0.405405	0.143411	4.67308	0.0535714
PIK3C2G_ENST00000433979	703	0.119488	0.823613	0.056899	0.145078	0.0690846	0.47619	0.135703	4.66935	0.0603318
C17orf64_ENST00000269127	51	0.137255	0.823529	0.0392157	0.166667	0.047619	0.285714	0.159091	4.66667	0.0408163
COMMD10	51	0.137255	0.823529	0.0392157	0.166667	0.047619	0.285714	0.159091	4.66667	0.0408163
CPLX4	51	0.117647	0.823529	0.0588235	0.142857	0.0714286	0.5	0.133333	4.66667	0.0625
DUSP19	51	0.156863	0.823529	0.0196078	0.190476	0.0238095	0.125	0.186047	4.66667	0.02
FBXO4_ENST00000296812	51	0.0980392	0.823529	0.0784314	0.119048	0.0952381	0.8	0.108696	4.66667	0.0851064
MS4A13	51	0.0588235	0.823529	0.117647	0.0714286	0.142857	2	0.0625	4.66667	0.133333
RFC3	51	0.156863	0.823529	0.0196078	0.190476	0.0238095	0.125	0.186047	4.66667	0.02
RRAGA	51	0.156863	0.823529	0.0196078	0.190476	0.0238095	0.125	0.186047	4.66667	0.02
TATDN3	51	0.137255	0.823529	0.0392157	0.166667	0.047619	0.285714	0.159091	4.66667	0.0408163
TLE1_ENST00000418319	51	0.156863	0.823529	0.0196078	0.190476	0.0238095	0.125	0.186047	4.66667	0.02
VDAC2	51	0.137255	0.823529	0.0392157	0.166667	0.047619	0.285714	0.159091	4.66667	0.0408163
ZNF330	51	0.117647	0.823529	0.0588235	0.142857	0.0714286	0.5	0.133333	4.66667	0.0625
OTUD3	68	0.161765	0.823529	0.0147059	0.196429	0.0178571	0.0909091	0.192982	4.66667	0.0149254
RNF32_ENST00000311822	68	0.147059	0.823529	0.0294118	0.178571	0.0357143	0.2	0.172414	4.66667	0.030303
SH3YL1	68	0.132353	0.823529	0.0441176	0.160714	0.0535714	0.333333	0.152542	4.66667	0.0461538
SLC25A36	68	0.147059	0.823529	0.0294118	0.178571	0.0357143	0.2	0.172414	4.66667	0.030303
TXNRD1_ENST00000427956	68	0.117647	0.823529	0.0588235	0.142857	0.0714286	0.5	0.133333	4.66667	0.0625
C16orf58	85	0.152941	0.823529	0.0235294	0.185714	0.0285714	0.153846	0.180556	4.66667	0.0240964
MSANTD2	85	0.152941	0.823529	0.0235294	0.185714	0.0285714	0.153846	0.180556	4.66667	0.0240964
PODNL1	85	0.164706	0.823529	0.0117647	0.2	0.0142857	0.0714286	0.197183	4.66667	0.0119048
SKAP2	85	0.141176	0.823529	0.0352941	0.171429	0.0428571	0.25	0.164384	4.66667	0.0365854
AGTPBP1_ENST00000376109	119	0.0840336	0.823529	0.092437	0.102041	0.112245	1.1	0.0917431	4.66667	0.101852
XRCC6	119	0.151261	0.823529	0.0252101	0.183673	0.0306122	0.166667	0.178218	4.66667	0.0258621
HDX	181	0.132597	0.823204	0.0441989	0.161074	0.0536913	0.333333	0.152866	4.65625	0.0462428
FGF3	147	0.14966	0.823129	0.0272109	0.181818	0.0330579	0.181818	0.176	4.65385	0.027972
NAA35	113	0.106195	0.823009	0.0707965	0.129032	0.0860215	0.666667	0.118812	4.65	0.0761905
TRDN	226	0.0884956	0.823009	0.0884956	0.107527	0.107527	1	0.0970874	4.65	0.0970874
YES1	175	0.0971429	0.822857	0.08	0.118056	0.0972222	0.823529	0.107595	4.64516	0.0869565
DCTN2_ENST00000543672	79	0.164557	0.822785	0.0126582	0.2	0.0153846	0.0769231	0.19697	4.64286	0.0128205
DDX3X	282	0.0992908	0.822695	0.0780142	0.12069	0.0948276	0.785714	0.110236	4.64	0.0846154
AKAP13_ENST00000426424	62	0.16129	0.822581	0.016129	0.196078	0.0196078	0.1	0.192308	4.63636	0.0163934
RHBDL1_ENST00000352681	62	0.177419	0.822581	0	0.215686	0	0	0.215686	4.63636	0
STARD6	62	0.112903	0.822581	0.0645161	0.137255	0.0784314	0.571429	0.127273	4.63636	0.0689655
TMEM171	62	0.177419	0.822581	0	0.215686	0	0	0.215686	4.63636	0
PSPC1	124	0.112903	0.822581	0.0645161	0.137255	0.0784314	0.571429	0.127273	4.63636	0.0689655
MED12_ENST00000374080	839	0.121573	0.822408	0.0560191	0.147826	0.0681159	0.460784	0.138399	4.63087	0.0593434
DCTN2	90	0.166667	0.822222	0.0111111	0.202703	0.0135135	0.0666667	0.2	4.625	0.011236
MS4A12	90	0.166667	0.822222	0.0111111	0.202703	0.0135135	0.0666667	0.2	4.625	0.011236
STK38L	90	0.133333	0.822222	0.0444444	0.162162	0.0540541	0.333333	0.153846	4.625	0.0465116
TRDMT1	90	0.133333	0.822222	0.0444444	0.162162	0.0540541	0.333333	0.153846	4.625	0.0465116
SUPT16H	208	0.139423	0.822115	0.0384615	0.169591	0.0467836	0.275862	0.162011	4.62162	0.04
MMP13	163	0.165644	0.822086	0.0122699	0.201493	0.0149254	0.0740741	0.198529	4.62069	0.0124224
ALK	1096	0.141423	0.82208	0.0364964	0.172031	0.0443951	0.258065	0.164718	4.62051	0.0378788
TMEM161B	118	0.152542	0.822034	0.0254237	0.185567	0.0309278	0.166667	0.18	4.61905	0.026087
PLCG1	500	0.15	0.822	0.028	0.182482	0.0340633	0.186667	0.176471	4.61798	0.0288066
LDHB	73	0.150685	0.821918	0.0273973	0.183333	0.0333333	0.181818	0.177419	4.61538	0.028169
ERLEC1	101	0.158416	0.821782	0.019802	0.192771	0.0240964	0.125	0.188235	4.61111	0.020202
MAPK9_ENST00000452135	101	0.148515	0.821782	0.029703	0.180723	0.0361446	0.2	0.174419	4.61111	0.0306122
TJAP1_ENST00000372445	101	0.168317	0.821782	0.00990099	0.204819	0.0120482	0.0588235	0.202381	4.61111	0.01
NBN	230	0.108696	0.821739	0.0695652	0.132275	0.0846561	0.64	0.121951	4.60976	0.0747664
CENPI	157	0.165605	0.821656	0.0127389	0.20155	0.0155039	0.0769231	0.198473	4.60714	0.0129032
PIK3CB	353	0.113314	0.82153	0.0651558	0.137931	0.0793103	0.575	0.127796	4.60317	0.069697
BUB3_ENST00000368865	56	0.160714	0.821429	0.0178571	0.195652	0.0217391	0.111111	0.191489	4.6	0.0181818
DBT_ENST00000370131	56	0.142857	0.821429	0.0357143	0.173913	0.0434783	0.25	0.166667	4.6	0.037037
KRTAP4-9	56	0.125	0.821429	0.0535714	0.152174	0.0652174	0.428571	0.142857	4.6	0.0566038
NT5C2_ENST00000423468	84	0.166667	0.821429	0.0119048	0.202899	0.0144928	0.0714286	0.2	4.6	0.0120482
TJAP1	112	0.169643	0.821429	0.00892857	0.206522	0.0108696	0.0526316	0.204301	4.6	0.00900901
MAX	140	0.0571429	0.821429	0.121429	0.0695652	0.147826	2.125	0.0606061	4.6	0.138211
EXOC1	196	0.117347	0.821429	0.0612245	0.142857	0.0745342	0.521739	0.132948	4.6	0.0652174
ZNF626_ENST00000392298	341	0.134897	0.821114	0.0439883	0.164286	0.0535714	0.326087	0.155932	4.59016	0.0460123
HIST1H3I	95	0.157895	0.821053	0.0210526	0.192308	0.025641	0.133333	0.1875	4.58824	0.0215054
MAPK9_ENST00000455781	95	0.147368	0.821053	0.0315789	0.179487	0.0384615	0.214286	0.17284	4.58824	0.0326087
TRMT1L	95	0.157895	0.821053	0.0210526	0.192308	0.025641	0.133333	0.1875	4.58824	0.0215054
TSGA14	95	0.168421	0.821053	0.0105263	0.205128	0.0128205	0.0625	0.202532	4.58824	0.0106383
BSG_ENST00000346916	67	0.164179	0.820896	0.0149254	0.2	0.0181818	0.0909091	0.196429	4.58333	0.0151515
HMX1	67	0.104478	0.820896	0.0746269	0.127273	0.0909091	0.714286	0.116667	4.58333	0.0806452
HNRNPA1L2	67	0.179104	0.820896	0	0.218182	0	0	0.218182	4.58333	0
INPP1	67	0.179104	0.820896	0	0.218182	0	0	0.218182	4.58333	0
RNASEH2A	67	0.149254	0.820896	0.0298507	0.181818	0.0363636	0.2	0.175439	4.58333	0.0307692
RRM2B	67	0.134328	0.820896	0.0447761	0.163636	0.0545455	0.333333	0.155172	4.58333	0.046875
FANCC_ENST00000289081	173	0.138728	0.820809	0.0404624	0.169014	0.0492958	0.291667	0.161074	4.58065	0.0421687
HOMEZ_ENST00000357460	106	0.141509	0.820755	0.0377358	0.172414	0.045977	0.266667	0.164835	4.57895	0.0392157
RAD51B_ENST00000487270	106	0.141509	0.820755	0.0377358	0.172414	0.045977	0.266667	0.164835	4.57895	0.0392157
PDS5A	251	0.139442	0.820717	0.0398406	0.169903	0.0485437	0.285714	0.162037	4.57778	0.0414938
BICC1_ENST00000263103	145	0.137931	0.82069	0.0413793	0.168067	0.0504202	0.3	0.16	4.57692	0.0431655
PITRM1_ENST00000451104	184	0.157609	0.820652	0.0217391	0.192053	0.0264901	0.137931	0.187097	4.57576	0.0222222
BOLL	78	0.179487	0.820513	0	0.21875	0	0	0.21875	4.57143	0
CCNB1IP1	78	0.0897436	0.820513	0.0897436	0.109375	0.109375	1	0.0985915	4.57143	0.0985915
UPP1	78	0.179487	0.820513	0	0.21875	0	0	0.21875	4.57143	0
MAP9	167	0.143713	0.820359	0.0359281	0.175182	0.0437956	0.25	0.167832	4.56667	0.0372671
TBX3	462	0.116883	0.820346	0.0627706	0.14248	0.0765172	0.537037	0.132353	4.56627	0.0669746
ETV6	306	0.114379	0.820261	0.0653595	0.139442	0.0796813	0.571429	0.129151	4.56364	0.0699301
IFT74	89	0.101124	0.820225	0.0786517	0.123288	0.0958904	0.777778	0.1125	4.5625	0.0853659
CASD1	178	0.157303	0.820225	0.0224719	0.191781	0.0273973	0.142857	0.186667	4.5625	0.0229885
MAGEB3	139	0.165468	0.820144	0.0143885	0.201754	0.0175439	0.0869565	0.198276	4.56	0.0145985
THOC2	328	0.146341	0.820122	0.0335366	0.178439	0.0408922	0.229167	0.171429	4.55932	0.0347003
POLE	984	0.140244	0.820122	0.0396341	0.171004	0.0483271	0.282609	0.163121	4.55932	0.0412698
TP53	12532	0.0110118	0.820061	0.168928	0.013428	0.205994	15.3406	0.0111344	4.55743	0.203265
C1orf88	50	0.12	0.82	0.06	0.146341	0.0731707	0.5	0.136364	4.55556	0.0638298
ENSG00000226232	50	0.18	0.82	0	0.219512	0	0	0.219512	4.55556	0
IDH3B_ENST00000435594	50	0.18	0.82	0	0.219512	0	0	0.219512	4.55556	0
NDUFS1_ENST00000455934	50	0.18	0.82	0	0.219512	0	0	0.219512	4.55556	0
POMGNT1_ENST00000535522	50	0.14	0.82	0.04	0.170732	0.0487805	0.285714	0.162791	4.55556	0.0416667
TMEM127	50	0.14	0.82	0.04	0.170732	0.0487805	0.285714	0.162791	4.55556	0.0416667
ABLIM1_ENST00000392952	100	0.13	0.82	0.05	0.158537	0.0609756	0.384615	0.149425	4.55556	0.0526316
LOC133308	100	0.13	0.82	0.05	0.158537	0.0609756	0.384615	0.149425	4.55556	0.0526316
NHEDC2	100	0.13	0.82	0.05	0.158537	0.0609756	0.384615	0.149425	4.55556	0.0526316
AGAP6	111	0.117117	0.81982	0.0630631	0.142857	0.0769231	0.538462	0.132653	4.55	0.0673077
RIPK2	111	0.135135	0.81982	0.045045	0.164835	0.0549451	0.333333	0.15625	4.55	0.0471698
KLF14	61	0.163934	0.819672	0.0163934	0.2	0.02	0.1	0.196078	4.54545	0.0166667
RNF114	61	0.163934	0.819672	0.0163934	0.2	0.02	0.1	0.196078	4.54545	0.0166667
WNK1_ENST00000340908	61	0.180328	0.819672	0	0.22	0	0	0.22	4.54545	0
SLC14A1	122	0.147541	0.819672	0.0327869	0.18	0.04	0.222222	0.173077	4.54545	0.0338983
PDE4D_ENST00000502484	133	0.135338	0.819549	0.0451128	0.165138	0.0550459	0.333333	0.156522	4.54167	0.0472441
ERCC5	349	0.143266	0.819484	0.0372493	0.174825	0.0454545	0.26	0.167224	4.53968	0.0386905
ATP5C1	72	0.138889	0.819444	0.0416667	0.169492	0.0508475	0.3	0.16129	4.53846	0.0434783
SLC25A32	72	0.138889	0.819444	0.0416667	0.169492	0.0508475	0.3	0.16129	4.53846	0.0434783
SUV39H2_ENST00000354919	72	0.138889	0.819444	0.0416667	0.169492	0.0508475	0.3	0.16129	4.53846	0.0434783
DZANK1_ENST00000329494	144	0.138889	0.819444	0.0416667	0.169492	0.0508475	0.3	0.16129	4.53846	0.0434783
ACCN5	155	0.16129	0.819355	0.0193548	0.19685	0.023622	0.12	0.192308	4.53571	0.0197368
ANKMY2	83	0.144578	0.819277	0.0361446	0.176471	0.0441176	0.25	0.169014	4.53333	0.0375
CUL2_ENST00000537177	83	0.108434	0.819277	0.0722892	0.132353	0.0882353	0.666667	0.121622	4.53333	0.0779221
DCP2	83	0.144578	0.819277	0.0361446	0.176471	0.0441176	0.25	0.169014	4.53333	0.0375
DHRS9	83	0.156627	0.819277	0.0240964	0.191176	0.0294118	0.153846	0.185714	4.53333	0.0246914
OBSL1_ENST00000265317	83	0.156627	0.819277	0.0240964	0.191176	0.0294118	0.153846	0.185714	4.53333	0.0246914
WASF2	83	0.156627	0.819277	0.0240964	0.191176	0.0294118	0.153846	0.185714	4.53333	0.0246914
LUZP4	116	0.0948276	0.818966	0.0862069	0.115789	0.105263	0.909091	0.104762	4.52381	0.0943396
NOX5_ENST00000388866	138	0.152174	0.818841	0.0289855	0.185841	0.0353982	0.190476	0.179487	4.52	0.0298507
CCND2	149	0.14094	0.818792	0.0402685	0.172131	0.0491803	0.285714	0.164062	4.51852	0.041958
FRYL_ENST00000537810	193	0.139896	0.818653	0.0414508	0.170886	0.0506329	0.296296	0.162651	4.51429	0.0432432
RICTOR_ENST00000296782	501	0.11976	0.818363	0.0618762	0.146341	0.0756098	0.516667	0.136054	4.50549	0.0659574
DNMT3A	842	0.103325	0.81829	0.0783848	0.12627	0.095791	0.758621	0.115232	4.50327	0.0850515
ATG16L1_ENST00000334050	55	0.0909091	0.818182	0.0909091	0.111111	0.111111	1	0.1	4.5	0.1
DAOA	55	0.127273	0.818182	0.0545455	0.155556	0.0666667	0.428571	0.145833	4.5	0.0576923
DNAJB7	55	0.145455	0.818182	0.0363636	0.177778	0.0444444	0.25	0.170213	4.5	0.0377358
DPM1	55	0.163636	0.818182	0.0181818	0.2	0.0222222	0.111111	0.195652	4.5	0.0185185
EID3	55	0.181818	0.818182	0	0.222222	0	0	0.222222	4.5	0
TGIF2	55	0.181818	0.818182	0	0.222222	0	0	0.222222	4.5	0
CCNE2	66	0.151515	0.818182	0.030303	0.185185	0.037037	0.2	0.178571	4.5	0.03125
FAM110C	66	0.181818	0.818182	0	0.222222	0	0	0.222222	4.5	0
HLA-DRA	77	0.142857	0.818182	0.038961	0.174603	0.047619	0.272727	0.166667	4.5	0.0405405
NUSAP1	77	0.12987	0.818182	0.0519481	0.15873	0.0634921	0.4	0.149254	4.5	0.0547945
PLSCR4	77	0.116883	0.818182	0.0649351	0.142857	0.0793651	0.555556	0.132353	4.5	0.0694444
GORASP1	88	0.181818	0.818182	0	0.222222	0	0	0.222222	4.5	0
OXSM	88	0.147727	0.818182	0.0340909	0.180556	0.0416667	0.230769	0.173333	4.5	0.0352941
PCBP2	88	0.147727	0.818182	0.0340909	0.180556	0.0416667	0.230769	0.173333	4.5	0.0352941
UGP2	99	0.161616	0.818182	0.020202	0.197531	0.0246914	0.125	0.192771	4.5	0.0206186
BIRC2	110	0.145455	0.818182	0.0363636	0.177778	0.0444444	0.25	0.170213	4.5	0.0377358
MYCL1_ENST00000397332	110	0.109091	0.818182	0.0727273	0.133333	0.0888889	0.666667	0.122449	4.5	0.0784314
MARCH7	121	0.115702	0.818182	0.0661157	0.141414	0.0808081	0.571429	0.130841	4.5	0.0707965
PIP5K1C_ENST00000537021	121	0.181818	0.818182	0	0.222222	0	0	0.222222	4.5	0
ZNF649	132	0.174242	0.818182	0.00757576	0.212963	0.00925926	0.0434783	0.211009	4.5	0.00763359
TBC1D2B_ENST00000300584	198	0.166667	0.818182	0.0151515	0.203704	0.0185185	0.0909091	0.2	4.5	0.0153846
TP53_ENST00000269305	11003	0.0106335	0.81805	0.171317	0.0129986	0.209421	16.1111	0.0107477	4.496	0.206734
BRD4_ENST00000263377	489	0.149284	0.817996	0.0327198	0.1825	0.04	0.219178	0.175481	4.49438	0.0338266
PAX5	280	0.164286	0.817857	0.0178571	0.200873	0.0218341	0.108696	0.196581	4.4902	0.0181818
CEP290_ENST00000309041	203	0.0935961	0.817734	0.08867	0.114458	0.108434	0.947368	0.103261	4.48649	0.0972973
RANBP6	203	0.172414	0.817734	0.00985222	0.210843	0.0120482	0.0571429	0.208333	4.48649	0.00995025
FBXW7_ENST00000534231	1004	0.0278884	0.817729	0.154382	0.0341048	0.188794	5.53571	0.0286885	4.48634	0.182568
PAK2_ENST00000327134	148	0.162162	0.817568	0.0202703	0.198347	0.0247934	0.125	0.193548	4.48148	0.0206897
TBRG4	137	0.153285	0.817518	0.0291971	0.1875	0.0357143	0.190476	0.181034	4.48	0.0300752
CCDC9	126	0.174603	0.81746	0.00793651	0.213592	0.00970874	0.0454545	0.211538	4.47826	0.008
USO1	126	0.126984	0.81746	0.0555556	0.15534	0.0679612	0.4375	0.145455	4.47826	0.0588235
CAPS2_ENST00000409445	115	0.113043	0.817391	0.0695652	0.138298	0.0851064	0.615385	0.127451	4.47619	0.0747664
COIL	115	0.156522	0.817391	0.026087	0.191489	0.0319149	0.166667	0.185567	4.47619	0.0267857
SERPIND1	115	0.173913	0.817391	0.00869565	0.212766	0.0106383	0.05	0.210526	4.47619	0.00877193
SERPIND1_ENST00000215727	115	0.173913	0.817391	0.00869565	0.212766	0.0106383	0.05	0.210526	4.47619	0.00877193
HOMEZ	104	0.144231	0.817308	0.0384615	0.176471	0.0470588	0.266667	0.168539	4.47368	0.04
MSL3_ENST00000398527	104	0.134615	0.817308	0.0480769	0.164706	0.0588235	0.357143	0.155556	4.47368	0.0505051
ANKRD36C_ENST00000295246	93	0.16129	0.817204	0.0215054	0.197368	0.0263158	0.133333	0.192308	4.47059	0.021978
RG9MTD1	93	0.129032	0.817204	0.0537634	0.157895	0.0657895	0.416667	0.148148	4.47059	0.0568182
ARSK	82	0.121951	0.817073	0.0609756	0.149254	0.0746269	0.5	0.138889	4.46667	0.0649351
DHRS9_ENST00000432060	82	0.170732	0.817073	0.0121951	0.208955	0.0149254	0.0714286	0.205882	4.46667	0.0123457
EIF3I	82	0.158537	0.817073	0.0243902	0.19403	0.0298507	0.153846	0.188406	4.46667	0.025
ERV3-1	82	0.146341	0.817073	0.0365854	0.179104	0.0447761	0.25	0.171429	4.46667	0.0379747
CXorf30_ENST00000378657	153	0.130719	0.816993	0.0522876	0.16	0.064	0.4	0.150376	4.46429	0.0551724
BCAP29	71	0.15493	0.816901	0.028169	0.189655	0.0344828	0.181818	0.183333	4.46154	0.0289855
H3F3B	71	0.126761	0.816901	0.056338	0.155172	0.0689655	0.444444	0.145161	4.46154	0.0597015
SGPP1	71	0.0985915	0.816901	0.084507	0.12069	0.103448	0.857143	0.109375	4.46154	0.0923077
C7orf33	60	0.183333	0.816667	0	0.22449	0	0	0.22449	4.45455	0
EXOSC4	60	0.183333	0.816667	0	0.22449	0	0	0.22449	4.45455	0
GSTM5	60	0.15	0.816667	0.0333333	0.183673	0.0408163	0.222222	0.176471	4.45455	0.0344828
LDHA_ENST00000540430	60	0.15	0.816667	0.0333333	0.183673	0.0408163	0.222222	0.176471	4.45455	0.0344828
NANOS3	60	0.166667	0.816667	0.0166667	0.204082	0.0204082	0.1	0.2	4.45455	0.0169492
PHB	60	0.166667	0.816667	0.0166667	0.204082	0.0204082	0.1	0.2	4.45455	0.0169492
POLB_ENST00000265421	60	0.133333	0.816667	0.05	0.163265	0.0612245	0.375	0.153846	4.45455	0.0526316
TGDS	60	0.183333	0.816667	0	0.22449	0	0	0.22449	4.45455	0
TRIM13_ENST00000356017	60	0.166667	0.816667	0.0166667	0.204082	0.0204082	0.1	0.2	4.45455	0.0169492
ETV1_ENST00000403527	240	0.129167	0.816667	0.0541667	0.158163	0.0663265	0.419355	0.148325	4.45455	0.0572687
SSX2IP_ENST00000370612	109	0.119266	0.816514	0.0642202	0.146067	0.0786517	0.538462	0.135417	4.45	0.0686275
C7orf63	218	0.155963	0.816514	0.0275229	0.191011	0.0337079	0.176471	0.184783	4.45	0.0283019
SLITRK6	354	0.138418	0.816384	0.0451977	0.16955	0.0553633	0.326531	0.160656	4.44615	0.0473373
DNAH2_ENST00000570791	147	0.122449	0.816327	0.0612245	0.15	0.075	0.5	0.139535	4.44444	0.0652174
B3GALT2	87	0.149425	0.816092	0.0344828	0.183099	0.0422535	0.230769	0.175676	4.4375	0.0357143
AXL_ENST00000301178	424	0.158019	0.816038	0.0259434	0.193642	0.0317919	0.164179	0.187675	4.4359	0.0266344
FBXO11_ENST00000403359	201	0.134328	0.81592	0.0497512	0.164634	0.0609756	0.37037	0.155172	4.43243	0.052356
BZW2	76	0.131579	0.815789	0.0526316	0.16129	0.0645161	0.4	0.151515	4.42857	0.0555556
FAM21C	76	0.131579	0.815789	0.0526316	0.16129	0.0645161	0.4	0.151515	4.42857	0.0555556
LTA4H_ENST00000413268	76	0.144737	0.815789	0.0394737	0.177419	0.0483871	0.272727	0.169231	4.42857	0.0410959
TMEM156	76	0.171053	0.815789	0.0131579	0.209677	0.016129	0.0769231	0.206349	4.42857	0.0133333
FGF14_ENST00000376143	114	0.175439	0.815789	0.00877193	0.215054	0.0107527	0.05	0.212766	4.42857	0.00884956
STRN3_ENST00000357479	114	0.140351	0.815789	0.0438596	0.172043	0.0537634	0.3125	0.163265	4.42857	0.0458716
CXorf30	152	0.138158	0.815789	0.0460526	0.169355	0.0564516	0.333333	0.160305	4.42857	0.0482759
ZFP36L2	190	0.115789	0.815789	0.0684211	0.141935	0.083871	0.590909	0.130952	4.42857	0.0734463
NMT2	103	0.126214	0.815534	0.0582524	0.154762	0.0714286	0.461538	0.144444	4.42105	0.0618557
EIF3A	298	0.154362	0.815436	0.0302013	0.1893	0.037037	0.195652	0.18254	4.41818	0.0311419
AIMP2	65	0.153846	0.815385	0.0307692	0.188679	0.0377358	0.2	0.181818	4.41667	0.031746
AVL9_ENST00000404479	65	0.153846	0.815385	0.0307692	0.188679	0.0377358	0.2	0.181818	4.41667	0.031746
C12orf26	157	0.11465	0.815287	0.0700637	0.140625	0.0859375	0.611111	0.129496	4.41379	0.0753425
FRRS1_ENST00000287474	92	0.141304	0.815217	0.0434783	0.173333	0.0533333	0.307692	0.164557	4.41176	0.0454545
SNAP25_ENST00000254976	92	0.130435	0.815217	0.0543478	0.16	0.0666667	0.416667	0.15	4.41176	0.0574713
IRF4_ENST00000380956	330	0.130303	0.815152	0.0545455	0.159851	0.0669145	0.418605	0.149826	4.40984	0.0576923
AHNAK2	119	0.151261	0.815126	0.0336134	0.185567	0.0412371	0.222222	0.178218	4.40909	0.0347826
ANXA10	119	0.12605	0.815126	0.0588235	0.154639	0.0721649	0.466667	0.144231	4.40909	0.0625
KAT8	119	0.168067	0.815126	0.0168067	0.206186	0.0206186	0.1	0.20202	4.40909	0.017094
LUM	119	0.151261	0.815126	0.0336134	0.185567	0.0412371	0.222222	0.178218	4.40909	0.0347826
TTC3_ENST00000540756	119	0.142857	0.815126	0.0420168	0.175258	0.0515464	0.294118	0.166667	4.40909	0.0438596
POTEM	146	0.164384	0.815068	0.0205479	0.201681	0.0252101	0.125	0.196721	4.40741	0.020979
MYO9A_ENST00000424560	481	0.126819	0.814969	0.0582121	0.155612	0.0714286	0.459016	0.145238	4.40449	0.0618102
ABCB5_ENST00000443026	54	0.12963	0.814815	0.0555556	0.159091	0.0681818	0.428571	0.148936	4.4	0.0588235
B9D2	54	0.166667	0.814815	0.0185185	0.204545	0.0227273	0.111111	0.2	4.4	0.0188679
C4orf29	54	0.0925926	0.814815	0.0925926	0.113636	0.113636	1	0.102041	4.4	0.102041
CLEC1B	54	0.166667	0.814815	0.0185185	0.204545	0.0227273	0.111111	0.2	4.4	0.0188679
CNTNAP3_ENST00000377653	54	0.166667	0.814815	0.0185185	0.204545	0.0227273	0.111111	0.2	4.4	0.0188679
H2BFM	54	0.166667	0.814815	0.0185185	0.204545	0.0227273	0.111111	0.2	4.4	0.0188679
HORMAD2	54	0.185185	0.814815	0	0.227273	0	0	0.227273	4.4	0
METTL7B_ENST00000394252	54	0.148148	0.814815	0.037037	0.181818	0.0454545	0.25	0.173913	4.4	0.0384615
PPIL2_ENST00000456792	54	0.166667	0.814815	0.0185185	0.204545	0.0227273	0.111111	0.2	4.4	0.0188679
RGN	54	0.166667	0.814815	0.0185185	0.204545	0.0227273	0.111111	0.2	4.4	0.0188679
VEGFB	54	0.148148	0.814815	0.037037	0.181818	0.0454545	0.25	0.173913	4.4	0.0384615
TXNRD1	81	0.135802	0.814815	0.0493827	0.166667	0.0606061	0.363636	0.157143	4.4	0.0519481
CCDC68	108	0.138889	0.814815	0.0462963	0.170455	0.0568182	0.333333	0.16129	4.4	0.0485437
PA2G4	108	0.138889	0.814815	0.0462963	0.170455	0.0568182	0.333333	0.16129	4.4	0.0485437
FBXO34	135	0.148148	0.814815	0.037037	0.181818	0.0454545	0.25	0.173913	4.4	0.0384615
PPHLN1_ENST00000395568	135	0.155556	0.814815	0.0296296	0.190909	0.0363636	0.190476	0.184211	4.4	0.0305344
LRP12	259	0.142857	0.814672	0.042471	0.175355	0.0521327	0.297297	0.166667	4.39583	0.0443548
SMC3	232	0.12931	0.814655	0.0560345	0.15873	0.0687831	0.433333	0.148515	4.39535	0.0593607
KIAA1107	178	0.140449	0.814607	0.0449438	0.172414	0.0551724	0.32	0.163399	4.39394	0.0470588
PGCP	151	0.145695	0.81457	0.0397351	0.178862	0.0487805	0.272727	0.170543	4.39286	0.0413793
CPSF6_ENST00000266679	124	0.137097	0.814516	0.0483871	0.168317	0.0594059	0.352941	0.158879	4.3913	0.0508475
DONSON	97	0.123711	0.814433	0.0618557	0.151899	0.0759494	0.5	0.141176	4.38889	0.0659341
MIER1_ENST00000401041	97	0.154639	0.814433	0.0309278	0.189873	0.0379747	0.2	0.182927	4.38889	0.0319149
RIC3	97	0.134021	0.814433	0.0515464	0.164557	0.0632911	0.384615	0.154762	4.38889	0.0543478
TDG	97	0.123711	0.814433	0.0618557	0.151899	0.0759494	0.5	0.141176	4.38889	0.0659341
ZC3H14	167	0.137725	0.814371	0.0479042	0.169118	0.0588235	0.347826	0.159722	4.3871	0.0503145
AGAP4	70	0.171429	0.814286	0.0142857	0.210526	0.0175439	0.0833333	0.206897	4.38462	0.0144928
BTG2	70	0.171429	0.814286	0.0142857	0.210526	0.0175439	0.0833333	0.206897	4.38462	0.0144928
C3orf26	70	0.142857	0.814286	0.0428571	0.175439	0.0526316	0.3	0.166667	4.38462	0.0447761
HOGA1	70	0.142857	0.814286	0.0428571	0.175439	0.0526316	0.3	0.166667	4.38462	0.0447761
MRPS31	70	0.0857143	0.814286	0.1	0.105263	0.122807	1.16667	0.09375	4.38462	0.111111
RICTOR	506	0.120553	0.814229	0.0652174	0.148058	0.0800971	0.540984	0.137079	4.38298	0.0697674
CDC16	113	0.141593	0.814159	0.0442478	0.173913	0.0543478	0.3125	0.164948	4.38095	0.0462963
RASGEF1B	113	0.150442	0.814159	0.0353982	0.184783	0.0434783	0.235294	0.177083	4.38095	0.0366972
ERG_ENST00000288319	269	0.141264	0.814126	0.0446097	0.173516	0.0547945	0.315789	0.164502	4.38	0.0466926
C5orf22	86	0.174419	0.813953	0.0116279	0.214286	0.0142857	0.0666667	0.211268	4.375	0.0117647
ZNF540	129	0.162791	0.813953	0.0232558	0.2	0.0285714	0.142857	0.194444	4.375	0.0238095
RTN3	172	0.133721	0.813953	0.0523256	0.164286	0.0642857	0.391304	0.154362	4.375	0.0552147
PIK3R2	274	0.160584	0.813869	0.0255474	0.197309	0.0313901	0.159091	0.191304	4.37255	0.0262172
OR4P4	161	0.167702	0.813665	0.0186335	0.206107	0.0229008	0.111111	0.201493	4.36667	0.0189873
C1orf228	59	0.186441	0.813559	0	0.229167	0	0	0.229167	4.36364	0
CDHR3_ENST00000343407	59	0.135593	0.813559	0.0508475	0.166667	0.0625	0.375	0.156863	4.36364	0.0535714
CDKL4	59	0.152542	0.813559	0.0338983	0.1875	0.0416667	0.222222	0.18	4.36364	0.0350877
IMMP2L	59	0.152542	0.813559	0.0338983	0.1875	0.0416667	0.222222	0.18	4.36364	0.0350877
MLX	59	0.118644	0.813559	0.0677966	0.145833	0.0833333	0.571429	0.134615	4.36364	0.0727273
MTHFD2_ENST00000394053	59	0.152542	0.813559	0.0338983	0.1875	0.0416667	0.222222	0.18	4.36364	0.0350877
PON2	59	0.169492	0.813559	0.0169492	0.208333	0.0208333	0.1	0.204082	4.36364	0.0172414
PON2_ENST00000536183	59	0.169492	0.813559	0.0169492	0.208333	0.0208333	0.1	0.204082	4.36364	0.0172414
VCX3B	59	0.135593	0.813559	0.0508475	0.166667	0.0625	0.375	0.156863	4.36364	0.0535714
IFLTD1	118	0.152542	0.813559	0.0338983	0.1875	0.0416667	0.222222	0.18	4.36364	0.0350877
XPNPEP3	118	0.161017	0.813559	0.0254237	0.197917	0.03125	0.157895	0.191919	4.36364	0.026087
MEF2B	177	0.163842	0.813559	0.0225989	0.201389	0.0277778	0.137931	0.195946	4.36364	0.0231214
POT1_ENST00000357628	252	0.111111	0.813492	0.0753968	0.136585	0.0926829	0.678571	0.125	4.3617	0.0815451
EED	134	0.104478	0.813433	0.0820896	0.12844	0.100917	0.785714	0.116667	4.36	0.0894309
OR8D4	134	0.156716	0.813433	0.0298507	0.192661	0.0366972	0.190476	0.185841	4.36	0.0307692
CCDC51	75	0.146667	0.813333	0.04	0.180328	0.0491803	0.272727	0.171875	4.35714	0.0416667
HNRNPK_ENST00000376256	75	0.16	0.813333	0.0266667	0.196721	0.0327869	0.166667	0.190476	4.35714	0.0273973
ULK2_ENST00000361658	182	0.142857	0.813187	0.043956	0.175676	0.0540541	0.307692	0.166667	4.35294	0.045977
GADL1	107	0.140187	0.813084	0.046729	0.172414	0.0574713	0.333333	0.163043	4.35	0.0490196
RAD51B	107	0.149533	0.813084	0.0373832	0.183908	0.045977	0.25	0.175824	4.35	0.038835
RINL	107	0.17757	0.813084	0.00934579	0.218391	0.0114943	0.0526316	0.215909	4.35	0.00943396
TRIM23_ENST00000381018	107	0.140187	0.813084	0.046729	0.172414	0.0574713	0.333333	0.163043	4.35	0.0490196
ZNF479	321	0.143302	0.813084	0.0436137	0.176245	0.0536398	0.304348	0.167273	4.35	0.0456026
DEPDC1	123	0.138211	0.813008	0.0487805	0.17	0.06	0.352941	0.160377	4.34783	0.0512821
SLC2A13_ENST00000280871	139	0.151079	0.81295	0.0359712	0.185841	0.0442478	0.238095	0.177966	4.34615	0.0373134
PIK3C3	294	0.12585	0.812925	0.0612245	0.154812	0.0753138	0.486486	0.143969	4.34545	0.0652174
KIAA1383	203	0.152709	0.812808	0.0344828	0.187879	0.0424242	0.225806	0.180233	4.34211	0.0357143
KIAA1383_ENST00000418460	203	0.152709	0.812808	0.0344828	0.187879	0.0424242	0.225806	0.180233	4.34211	0.0357143
THOC2_ENST00000245838	347	0.15562	0.81268	0.0317003	0.191489	0.0390071	0.203704	0.1843	4.33846	0.0327381
JAK1	523	0.10325	0.81262	0.08413	0.127059	0.103529	0.814815	0.115139	4.33673	0.091858
ERBB4	1179	0.112807	0.812553	0.0746395	0.138831	0.091858	0.661654	0.127151	4.33484	0.0806599
AS3MT	64	0.140625	0.8125	0.046875	0.173077	0.0576923	0.333333	0.163636	4.33333	0.0491803
C10orf88	64	0.15625	0.8125	0.03125	0.192308	0.0384615	0.2	0.185185	4.33333	0.0322581
C11orf57	64	0.171875	0.8125	0.015625	0.211538	0.0192308	0.0909091	0.207547	4.33333	0.015873
FMR1_ENST00000334557	64	0.15625	0.8125	0.03125	0.192308	0.0384615	0.2	0.185185	4.33333	0.0322581
HEXB	64	0.0625	0.8125	0.125	0.0769231	0.153846	2	0.0666667	4.33333	0.142857
MTHFSD_ENST00000381214	64	0.1875	0.8125	0	0.230769	0	0	0.230769	4.33333	0
OMD	64	0.140625	0.8125	0.046875	0.173077	0.0576923	0.333333	0.163636	4.33333	0.0491803
VGLL3_ENST00000383698	64	0.125	0.8125	0.0625	0.153846	0.0769231	0.5	0.142857	4.33333	0.0666667
NPIPL2_ENST00000429990	80	0.1625	0.8125	0.025	0.2	0.0307692	0.153846	0.19403	4.33333	0.025641
POU6F1	80	0.1875	0.8125	0	0.230769	0	0	0.230769	4.33333	0
SLC16A11	80	0.125	0.8125	0.0625	0.153846	0.0769231	0.5	0.142857	4.33333	0.0666667
STK4	80	0.1125	0.8125	0.075	0.138462	0.0923077	0.666667	0.126761	4.33333	0.0810811
CDKL3_ENST00000521118	96	0.114583	0.8125	0.0729167	0.141026	0.0897436	0.636364	0.129412	4.33333	0.0786517
NEK11_ENST00000507910	96	0.114583	0.8125	0.0729167	0.141026	0.0897436	0.636364	0.129412	4.33333	0.0786517
NEK11_ENST00000511262	96	0.114583	0.8125	0.0729167	0.141026	0.0897436	0.636364	0.129412	4.33333	0.0786517
PRKAR2B	96	0.104167	0.8125	0.0833333	0.128205	0.102564	0.8	0.116279	4.33333	0.0909091
USO1_ENST00000538159	128	0.117188	0.8125	0.0703125	0.144231	0.0865385	0.6	0.132743	4.33333	0.0756303
AXIN2	368	0.138587	0.8125	0.048913	0.170569	0.0602007	0.352941	0.160883	4.33333	0.0514286
BIRC3	181	0.0939227	0.812155	0.0939227	0.115646	0.115646	1	0.103659	4.32353	0.103659
COL5A2	463	0.159827	0.812095	0.0280778	0.196809	0.0345745	0.175676	0.190231	4.32184	0.0288889
SNAP91_ENST00000439399	298	0.151007	0.812081	0.0369128	0.18595	0.0454545	0.244444	0.177866	4.32143	0.0383275
CAPRIN1_ENST00000389645	133	0.120301	0.81203	0.0676692	0.148148	0.0833333	0.5625	0.136752	4.32	0.0725806
HHIP	266	0.146617	0.81203	0.0413534	0.180556	0.0509259	0.282051	0.171806	4.32	0.0431373
PDE4D_ENST00000503258	117	0.136752	0.811966	0.0512821	0.168421	0.0631579	0.375	0.158416	4.31818	0.0540541
PDE1A_ENST00000410103	218	0.12844	0.811927	0.059633	0.158192	0.0734463	0.464286	0.147368	4.31707	0.0634146
BTN2A3	101	0.178218	0.811881	0.00990099	0.219512	0.0121951	0.0555556	0.216867	4.31579	0.01
NFX1_ENST00000318524	101	0.158416	0.811881	0.029703	0.195122	0.0365854	0.1875	0.188235	4.31579	0.0306122
PLEKHA5_ENST00000309364	101	0.168317	0.811881	0.019802	0.207317	0.0243902	0.117647	0.202381	4.31579	0.020202
C17orf85_ENST00000389005	85	0.164706	0.811765	0.0235294	0.202899	0.0289855	0.142857	0.197183	4.3125	0.0240964
CD28	85	0.176471	0.811765	0.0117647	0.217391	0.0144928	0.0666667	0.214286	4.3125	0.0119048
DCTN2_ENST00000434715	85	0.176471	0.811765	0.0117647	0.217391	0.0144928	0.0666667	0.214286	4.3125	0.0119048
EPHA5	887	0.128523	0.811725	0.059752	0.158333	0.0736111	0.464912	0.147477	4.31138	0.0635492
KDM1B	122	0.163934	0.811475	0.0245902	0.20202	0.030303	0.15	0.196078	4.30435	0.0252101
PDGFRA	684	0.146199	0.811404	0.0423977	0.18018	0.0522523	0.29	0.171233	4.30233	0.0442748
SOX17	334	0.152695	0.811377	0.0359281	0.188192	0.0442804	0.235294	0.180212	4.30159	0.0372671
C10orf53	53	0.169811	0.811321	0.0188679	0.209302	0.0232558	0.111111	0.204545	4.3	0.0192308
GDPD1_ENST00000581276	53	0.169811	0.811321	0.0188679	0.209302	0.0232558	0.111111	0.204545	4.3	0.0192308
MAGIX_ENST00000376338	53	0.188679	0.811321	0	0.232558	0	0	0.232558	4.3	0
NPR1_ENST00000368677	53	0.113208	0.811321	0.0754717	0.139535	0.0930233	0.666667	0.12766	4.3	0.0816327
OR6C68_ENST00000379662	53	0.169811	0.811321	0.0188679	0.209302	0.0232558	0.111111	0.204545	4.3	0.0192308
PABPCP2	53	0.169811	0.811321	0.0188679	0.209302	0.0232558	0.111111	0.204545	4.3	0.0192308
PTAR1_ENST00000340434	53	0.150943	0.811321	0.0377358	0.186047	0.0465116	0.25	0.177778	4.3	0.0392157
TATDN1	53	0.150943	0.811321	0.0377358	0.186047	0.0465116	0.25	0.177778	4.3	0.0392157
THAP7	53	0.169811	0.811321	0.0188679	0.209302	0.0232558	0.111111	0.204545	4.3	0.0192308
ZNF691_ENST00000372503	53	0.188679	0.811321	0	0.232558	0	0	0.232558	4.3	0
METTL3	106	0.160377	0.811321	0.0283019	0.197674	0.0348837	0.176471	0.191011	4.3	0.0291262
KIAA1772	159	0.144654	0.811321	0.0440252	0.178295	0.0542636	0.304348	0.169118	4.3	0.0460526
SNAP91	302	0.152318	0.811258	0.0364238	0.187755	0.044898	0.23913	0.179688	4.29825	0.0378007
C10orf81_ENST00000369312	90	0.166667	0.811111	0.0222222	0.205479	0.0273973	0.133333	0.2	4.29412	0.0227273
MIER1	90	0.155556	0.811111	0.0333333	0.191781	0.0410959	0.214286	0.184211	4.29412	0.0344828
RSC1A1	90	0.166667	0.811111	0.0222222	0.205479	0.0273973	0.133333	0.2	4.29412	0.0227273
CEP85	127	0.149606	0.811024	0.0393701	0.184466	0.0485437	0.263158	0.175926	4.29167	0.0409836
LIG4	201	0.144279	0.810945	0.0447761	0.177914	0.0552147	0.310345	0.168605	4.28947	0.046875
ENKUR	74	0.162162	0.810811	0.027027	0.2	0.0333333	0.166667	0.193548	4.28571	0.0277778
HLA-DRB5	74	0.135135	0.810811	0.0540541	0.166667	0.0666667	0.4	0.15625	4.28571	0.0571429
LSM11	74	0.162162	0.810811	0.027027	0.2	0.0333333	0.166667	0.193548	4.28571	0.0277778
MSRB3	74	0.148649	0.810811	0.0405405	0.183333	0.05	0.272727	0.174603	4.28571	0.0422535
NDUFV2	74	0.162162	0.810811	0.027027	0.2	0.0333333	0.166667	0.193548	4.28571	0.0277778
CDC40	111	0.126126	0.810811	0.0630631	0.155556	0.0777778	0.5	0.14433	4.28571	0.0673077
CYP4V2	111	0.135135	0.810811	0.0540541	0.166667	0.0666667	0.4	0.15625	4.28571	0.0571429
DKFZP564O0823	111	0.171171	0.810811	0.018018	0.211111	0.0222222	0.105263	0.206522	4.28571	0.0183486
ARAF	259	0.150579	0.810811	0.03861	0.185714	0.047619	0.25641	0.177273	4.28571	0.0401606
RDX	132	0.136364	0.810606	0.0530303	0.168224	0.0654206	0.388889	0.157895	4.28	0.056
RPTOR_ENST00000537330	132	0.128788	0.810606	0.0606061	0.158879	0.0747664	0.470588	0.147826	4.28	0.0645161
AC027369_8	95	0.157895	0.810526	0.0315789	0.194805	0.038961	0.2	0.1875	4.27778	0.0326087
ADIPOR2	95	0.136842	0.810526	0.0526316	0.168831	0.0649351	0.384615	0.158537	4.27778	0.0555556
BCL2L11	95	0.126316	0.810526	0.0631579	0.155844	0.0779221	0.5	0.144578	4.27778	0.0674157
CPT2	95	0.126316	0.810526	0.0631579	0.155844	0.0779221	0.5	0.144578	4.27778	0.0674157
MYL10	95	0.168421	0.810526	0.0210526	0.207792	0.025974	0.125	0.202532	4.27778	0.0215054
RNMT	95	0.136842	0.810526	0.0526316	0.168831	0.0649351	0.384615	0.158537	4.27778	0.0555556
BBS4_ENST00000395205	58	0.172414	0.810345	0.0172414	0.212766	0.0212766	0.1	0.208333	4.27273	0.0175439
INO80B_ENST00000233331	58	0.172414	0.810345	0.0172414	0.212766	0.0212766	0.1	0.208333	4.27273	0.0175439
KCTD11	58	0.189655	0.810345	0	0.234043	0	0	0.234043	4.27273	0
KLHL13_ENST00000540167	58	0.189655	0.810345	0	0.234043	0	0	0.234043	4.27273	0
PIP5KL1	58	0.189655	0.810345	0	0.234043	0	0	0.234043	4.27273	0
GPR107	116	0.137931	0.810345	0.0517241	0.170213	0.0638298	0.375	0.16	4.27273	0.0545455
KDM1B_ENST00000388870	116	0.163793	0.810345	0.0258621	0.202128	0.0319149	0.157895	0.195876	4.27273	0.0265487
RBMX	116	0.155172	0.810345	0.0344828	0.191489	0.0425532	0.222222	0.183673	4.27273	0.0357143
SOCS1	174	0.126437	0.810345	0.0632184	0.156028	0.0780142	0.5	0.144737	4.27273	0.0674847
KCNJ16	137	0.175182	0.810219	0.0145985	0.216216	0.018018	0.0833333	0.212389	4.26923	0.0148148
ODAM	79	0.177215	0.810127	0.0126582	0.21875	0.015625	0.0714286	0.215385	4.26667	0.0128205
RPL4	79	0.189873	0.810127	0	0.234375	0	0	0.234375	4.26667	0
ZNF552	79	0.151899	0.810127	0.0379747	0.1875	0.046875	0.25	0.179104	4.26667	0.0394737
ZNF69_ENST00000429654	79	0.177215	0.810127	0.0126582	0.21875	0.015625	0.0714286	0.215385	4.26667	0.0128205
RGS12_ENST00000338806	158	0.177215	0.810127	0.0126582	0.21875	0.015625	0.0714286	0.215385	4.26667	0.0128205
SPOCK3	237	0.135021	0.810127	0.0548523	0.166667	0.0677083	0.40625	0.156098	4.26667	0.0580357
MGAT4C	258	0.151163	0.810078	0.0387597	0.186603	0.0478469	0.25641	0.178082	4.26531	0.0403226
FIG4	179	0.139665	0.810056	0.0502793	0.172414	0.062069	0.36	0.162338	4.26471	0.0529412
C11orf80	100	0.17	0.81	0.02	0.209877	0.0246914	0.117647	0.204819	4.26316	0.0204082
DNAJC21_ENST00000303525	100	0.12	0.81	0.07	0.148148	0.0864198	0.583333	0.136364	4.26316	0.0752688
LRRD1	100	0.08	0.81	0.11	0.0987654	0.135802	1.375	0.0869565	4.26316	0.123596
SULT1B1	100	0.17	0.81	0.02	0.209877	0.0246914	0.117647	0.204819	4.26316	0.0204082
PTPRD	1521	0.139382	0.809993	0.0506246	0.172078	0.0625	0.363208	0.161956	4.26298	0.0533241
TRPM7	321	0.149533	0.809969	0.0404984	0.184615	0.05	0.270833	0.175824	4.2623	0.0422078
HNF4G_ENST00000396423	221	0.140271	0.809955	0.0497738	0.173184	0.0614525	0.354839	0.163158	4.2619	0.052381
MET	663	0.135747	0.809955	0.0542986	0.167598	0.0670391	0.4	0.157068	4.2619	0.0574163
IFT81_ENST00000242591	121	0.140496	0.809917	0.0495868	0.173469	0.0612245	0.352941	0.163462	4.26087	0.0521739
KAT7	142	0.140845	0.809859	0.0492958	0.173913	0.0608696	0.35	0.163934	4.25926	0.0518519
SHQ1	142	0.0985915	0.809859	0.0915493	0.121739	0.113043	0.928571	0.109375	4.25926	0.100775
XRN1	305	0.114754	0.809836	0.0754098	0.1417	0.0931174	0.657143	0.12963	4.25862	0.0815603
TCF3_ENST00000344749	205	0.136585	0.809756	0.0536585	0.168675	0.0662651	0.392857	0.158192	4.25641	0.056701
POT1	268	0.108209	0.809701	0.0820896	0.133641	0.101382	0.758621	0.121339	4.2549	0.0894309
TGFBR2	436	0.0665138	0.809633	0.123853	0.082153	0.152975	1.86207	0.0712531	4.25301	0.141361
ECE2_ENST00000324557	63	0.111111	0.809524	0.0793651	0.137255	0.0980392	0.714286	0.125	4.25	0.0862069
GPR180	63	0.174603	0.809524	0.015873	0.215686	0.0196078	0.0909091	0.211538	4.25	0.016129
OSTM1	63	0.126984	0.809524	0.0634921	0.156863	0.0784314	0.5	0.145455	4.25	0.0677966
PLSCR2	63	0.142857	0.809524	0.047619	0.176471	0.0588235	0.333333	0.166667	4.25	0.05
TRIM13	63	0.15873	0.809524	0.031746	0.196078	0.0392157	0.2	0.188679	4.25	0.0327869
C13orf26	84	0.119048	0.809524	0.0714286	0.147059	0.0882353	0.6	0.135135	4.25	0.0769231
GBX1	84	0.178571	0.809524	0.0119048	0.220588	0.0147059	0.0666667	0.217391	4.25	0.0120482
PDCL3	84	0.166667	0.809524	0.0238095	0.205882	0.0294118	0.142857	0.2	4.25	0.0243902
DEPDC1_ENST00000456315	168	0.142857	0.809524	0.047619	0.176471	0.0588235	0.333333	0.166667	4.25	0.05
MLXIPL	231	0.17316	0.809524	0.017316	0.213904	0.0213904	0.1	0.209424	4.25	0.0176211
CSF3R_ENST00000373104	257	0.159533	0.809339	0.0311284	0.197115	0.0384615	0.195122	0.189815	4.2449	0.0321285
C7orf63_ENST00000389297	215	0.162791	0.809302	0.027907	0.201149	0.0344828	0.171429	0.194444	4.2439	0.0287081
C17orf57	194	0.159794	0.809278	0.0309278	0.197452	0.0382166	0.193548	0.190184	4.24324	0.0319149
TRPM6_ENST00000361255	173	0.156069	0.809249	0.0346821	0.192857	0.0428571	0.222222	0.184932	4.24242	0.0359281
OLFM3_ENST00000359814	110	0.136364	0.809091	0.0545455	0.168539	0.0674157	0.4	0.157895	4.2381	0.0576923
PTGES3L-AARSD1	110	0.154545	0.809091	0.0363636	0.191011	0.0449438	0.235294	0.182796	4.2381	0.0377358
RINL_ENST00000591812	110	0.163636	0.809091	0.0272727	0.202247	0.0337079	0.166667	0.195652	4.2381	0.0280374
RAPGEF2	309	0.15534	0.809061	0.0355987	0.192	0.044	0.229167	0.183908	4.23729	0.0369128
C6orf168	89	0.191011	0.808989	0	0.236111	0	0	0.236111	4.23529	0
MFSD8	89	0.123596	0.808989	0.0674157	0.152778	0.0833333	0.545455	0.141026	4.23529	0.0722892
USP53	178	0.134831	0.808989	0.0561798	0.166667	0.0694444	0.416667	0.155844	4.23529	0.0595238
PTPRD_ENST00000355233	1141	0.134093	0.80894	0.0569676	0.165764	0.0704225	0.424837	0.154858	4.23394	0.0604089
ERVW-1	68	0.161765	0.808824	0.0294118	0.2	0.0363636	0.181818	0.192982	4.23077	0.030303
KRTAP4-7	68	0.191176	0.808824	0	0.236364	0	0	0.236364	4.23077	0
RPP30_ENST00000413330	68	0.176471	0.808824	0.0147059	0.218182	0.0181818	0.0833333	0.214286	4.23077	0.0149254
SLC39A7	68	0.161765	0.808824	0.0294118	0.2	0.0363636	0.181818	0.192982	4.23077	0.030303
SPI1	68	0.161765	0.808824	0.0294118	0.2	0.0363636	0.181818	0.192982	4.23077	0.030303
SSX5_ENST00000403001	68	0.191176	0.808824	0	0.236364	0	0	0.236364	4.23077	0
TNFRSF10B	68	0.132353	0.808824	0.0588235	0.163636	0.0727273	0.444444	0.152542	4.23077	0.0625
UGCG	68	0.147059	0.808824	0.0441176	0.181818	0.0545455	0.3	0.172414	4.23077	0.0461538
BRCA1_ENST00000471181	612	0.112745	0.808824	0.0784314	0.139394	0.0969697	0.695652	0.127072	4.23077	0.0851064
GOPC	115	0.156522	0.808696	0.0347826	0.193548	0.0430108	0.222222	0.185567	4.22727	0.036036
GPSM2	115	0.113043	0.808696	0.0782609	0.139785	0.0967742	0.692308	0.127451	4.22727	0.0849057
KIF2A_ENST00000407818	115	0.13913	0.808696	0.0521739	0.172043	0.0645161	0.375	0.161616	4.22727	0.0550459
IK_ENST00000417647	94	0.159574	0.808511	0.0319149	0.197368	0.0394737	0.2	0.189873	4.22222	0.032967
SNX7	94	0.170213	0.808511	0.0212766	0.210526	0.0263158	0.125	0.205128	4.22222	0.0217391
PTPRD_ENST00000381196	1487	0.140551	0.808339	0.0511096	0.173877	0.063228	0.363636	0.163537	4.21754	0.0538625
ABAT	120	0.175	0.808333	0.0166667	0.216495	0.0206186	0.0952381	0.212121	4.21739	0.0169492
FAM178A	120	0.158333	0.808333	0.0333333	0.195876	0.0412371	0.210526	0.188119	4.21739	0.0344828
ZNF793_ENST00000445217	120	0.166667	0.808333	0.025	0.206186	0.0309278	0.15	0.2	4.21739	0.025641
BRD4	266	0.157895	0.808271	0.0338346	0.195349	0.0418605	0.214286	0.1875	4.21569	0.0350195
GULP1	73	0.150685	0.808219	0.0410959	0.186441	0.0508475	0.272727	0.177419	4.21429	0.0428571
HARS_ENST00000512655	73	0.150685	0.808219	0.0410959	0.186441	0.0508475	0.272727	0.177419	4.21429	0.0428571
RNASEL_ENST00000539397	73	0.150685	0.808219	0.0410959	0.186441	0.0508475	0.272727	0.177419	4.21429	0.0428571
SPRY2	73	0.136986	0.808219	0.0547945	0.169492	0.0677966	0.4	0.15873	4.21429	0.057971
PTPRD_ENST00000346816	1079	0.133457	0.808156	0.0583874	0.165138	0.0722477	0.4375	0.154011	4.21256	0.0620079
C6orf103	172	0.156977	0.80814	0.0348837	0.194245	0.0431655	0.222222	0.186207	4.21212	0.0361446
KIAA1107_ENST00000409154	172	0.139535	0.80814	0.0523256	0.172662	0.0647482	0.375	0.162162	4.21212	0.0552147
MTBP	172	0.133721	0.80814	0.0581395	0.165468	0.0719424	0.434783	0.154362	4.21212	0.0617284
TUBB2C	99	0.171717	0.808081	0.020202	0.2125	0.025	0.117647	0.207317	4.21053	0.0206186
PDE1A	224	0.133929	0.808036	0.0580357	0.165746	0.0718232	0.433333	0.154639	4.2093	0.0616114
NHLRC2	125	0.136	0.808	0.056	0.168317	0.0693069	0.411765	0.157407	4.20833	0.059322
AGXT2L1	151	0.172185	0.807947	0.0198675	0.213115	0.0245902	0.115385	0.208	4.2069	0.0202703
PAK1_ENST00000278568	151	0.13245	0.807947	0.0596026	0.163934	0.0737705	0.45	0.152672	4.2069	0.0633803
MIS18BP1	203	0.157635	0.807882	0.0344828	0.195122	0.0426829	0.21875	0.187135	4.20513	0.0357143
ATF1_ENST00000262053	52	0.153846	0.807692	0.0384615	0.190476	0.047619	0.25	0.181818	4.2	0.04
FHAD1	52	0.173077	0.807692	0.0192308	0.214286	0.0238095	0.111111	0.209302	4.2	0.0196078
FNBP1_ENST00000443566	52	0.173077	0.807692	0.0192308	0.214286	0.0238095	0.111111	0.209302	4.2	0.0196078
LFNG	52	0.192308	0.807692	0	0.238095	0	0	0.238095	4.2	0
LOC653698	52	0.192308	0.807692	0	0.238095	0	0	0.238095	4.2	0
NUS1	52	0.192308	0.807692	0	0.238095	0	0	0.238095	4.2	0
SPINT2	52	0.153846	0.807692	0.0384615	0.190476	0.047619	0.25	0.181818	4.2	0.04
SSX3_ENST00000376895	52	0.192308	0.807692	0	0.238095	0	0	0.238095	4.2	0
DOHH	78	0.179487	0.807692	0.0128205	0.222222	0.015873	0.0714286	0.21875	4.2	0.012987
KIAA0391	78	0.179487	0.807692	0.0128205	0.222222	0.015873	0.0714286	0.21875	4.2	0.012987
BIVM	104	0.163462	0.807692	0.0288462	0.202381	0.0357143	0.176471	0.195402	4.2	0.029703
HPS5	182	0.137363	0.807692	0.0549451	0.170068	0.0680272	0.4	0.159236	4.2	0.0581395
FGFR1_ENST00000341462	343	0.163265	0.80758	0.0291545	0.202166	0.0361011	0.178571	0.195122	4.19697	0.03003
TBC1D2B	187	0.176471	0.807487	0.0160428	0.218543	0.0198675	0.0909091	0.214286	4.19444	0.0163043
CCT6A	109	0.183486	0.807339	0.00917431	0.227273	0.0113636	0.05	0.224719	4.19048	0.00925926
SPTLC2	109	0.146789	0.807339	0.0458716	0.181818	0.0568182	0.3125	0.172043	4.19048	0.0480769
VTCN1	109	0.174312	0.807339	0.0183486	0.215909	0.0227273	0.105263	0.211111	4.19048	0.0186916
ACTL6A	83	0.108434	0.807229	0.0843373	0.134328	0.104478	0.777778	0.121622	4.1875	0.0921053
ANKHD1_ENST00000394723	83	0.144578	0.807229	0.0481928	0.179104	0.0597015	0.333333	0.169014	4.1875	0.0506329
C17orf80_ENST00000426147	83	0.13253	0.807229	0.060241	0.164179	0.0746269	0.454545	0.152778	4.1875	0.0641026
C9orf119	83	0.180723	0.807229	0.0120482	0.223881	0.0149254	0.0666667	0.220588	4.1875	0.0121951
CD79B	140	0.114286	0.807143	0.0785714	0.141593	0.0973451	0.6875	0.129032	4.18519	0.0852713
FAM161A	140	0.121429	0.807143	0.0714286	0.150442	0.0884956	0.588235	0.138211	4.18519	0.0769231
CLEC7A_ENST00000304084	57	0.175439	0.807018	0.0175439	0.217391	0.0217391	0.1	0.212766	4.18182	0.0178571
HIST1H3J	57	0.140351	0.807018	0.0526316	0.173913	0.0652174	0.375	0.163265	4.18182	0.0555556
MFAP3	57	0.140351	0.807018	0.0526316	0.173913	0.0652174	0.375	0.163265	4.18182	0.0555556
RPP30	57	0.192982	0.807018	0	0.23913	0	0	0.23913	4.18182	0
TBC1D26	57	0.192982	0.807018	0	0.23913	0	0	0.23913	4.18182	0
ABCD3	114	0.149123	0.807018	0.0438596	0.184783	0.0543478	0.294118	0.175258	4.18182	0.0458716
FDPS	114	0.184211	0.807018	0.00877193	0.228261	0.0108696	0.047619	0.225806	4.18182	0.00884956
FMO5	114	0.149123	0.807018	0.0438596	0.184783	0.0543478	0.294118	0.175258	4.18182	0.0458716
NFKBIE	114	0.140351	0.807018	0.0526316	0.173913	0.0652174	0.375	0.163265	4.18182	0.0555556
FBLN1_ENST00000348697	171	0.157895	0.807018	0.0350877	0.195652	0.0434783	0.222222	0.1875	4.18182	0.0363636
ERBB4_ENST00000402597	1093	0.116194	0.806953	0.0768527	0.143991	0.0952381	0.661417	0.13147	4.18009	0.0832507
C15orf23_ENST00000416151	88	0.193182	0.806818	0	0.239437	0	0	0.239437	4.17647	0
FAM35A	88	0.170455	0.806818	0.0227273	0.211268	0.028169	0.133333	0.205479	4.17647	0.0232558
LANCL1	88	0.170455	0.806818	0.0227273	0.211268	0.028169	0.133333	0.205479	4.17647	0.0232558
TRA2B	88	0.113636	0.806818	0.0795455	0.140845	0.0985915	0.7	0.128205	4.17647	0.0864198
UGDH	88	0.147727	0.806818	0.0454545	0.183099	0.056338	0.307692	0.173333	4.17647	0.047619
ZNF721	295	0.166102	0.80678	0.0271186	0.205882	0.0336134	0.163265	0.199187	4.17544	0.0278746
MTO1	119	0.151261	0.806723	0.0420168	0.1875	0.0520833	0.277778	0.178218	4.17391	0.0438596
CD70	62	0.177419	0.806452	0.016129	0.22	0.02	0.0909091	0.215686	4.16667	0.0163934
CDK7_ENST00000256443	62	0.112903	0.806452	0.0806452	0.14	0.1	0.714286	0.127273	4.16667	0.0877193
CREBZF	62	0.177419	0.806452	0.016129	0.22	0.02	0.0909091	0.215686	4.16667	0.0163934
GRAMD1C_ENST00000452134	62	0.0483871	0.806452	0.145161	0.06	0.18	3	0.0508475	4.16667	0.169811
RPP40	62	0.16129	0.806452	0.0322581	0.2	0.04	0.2	0.192308	4.16667	0.0333333
STBD1	62	0.193548	0.806452	0	0.24	0	0	0.24	4.16667	0
VTA1	62	0.16129	0.806452	0.0322581	0.2	0.04	0.2	0.192308	4.16667	0.0333333
APLF	93	0.182796	0.806452	0.0107527	0.226667	0.0133333	0.0588235	0.223684	4.16667	0.0108696
IFIT2	93	0.139785	0.806452	0.0537634	0.173333	0.0666667	0.384615	0.1625	4.16667	0.0568182
TBC1D7	93	0.139785	0.806452	0.0537634	0.173333	0.0666667	0.384615	0.1625	4.16667	0.0568182
GFPT1	124	0.16129	0.806452	0.0322581	0.2	0.04	0.2	0.192308	4.16667	0.0333333
EPHA3	904	0.121681	0.806416	0.0719027	0.150892	0.0891632	0.590909	0.138539	4.16571	0.0774732
STAT1	191	0.157068	0.806283	0.0366492	0.194805	0.0454545	0.233333	0.186335	4.16216	0.0380435
FAM161A_ENST00000404929	160	0.125	0.80625	0.06875	0.155039	0.0852713	0.55	0.142857	4.16129	0.0738255
PAK1	160	0.1375	0.80625	0.05625	0.170543	0.0697674	0.409091	0.15942	4.16129	0.0596026
FLT1_ENST00000541932	418	0.148325	0.80622	0.0454545	0.183976	0.0563798	0.306452	0.174157	4.16049	0.047619
AR	717	0.143654	0.806137	0.0502092	0.178201	0.0622837	0.349515	0.167752	4.15827	0.0528634
C10orf81	98	0.163265	0.806122	0.0306122	0.202532	0.0379747	0.1875	0.195122	4.15789	0.0315789
RCOR3_ENST00000419091	98	0.163265	0.806122	0.0306122	0.202532	0.0379747	0.1875	0.195122	4.15789	0.0315789
SLC4A7	232	0.137931	0.806034	0.0560345	0.171123	0.0695187	0.40625	0.16	4.15556	0.0593607
DNAJB14_ENST00000442697	67	0.134328	0.80597	0.0597015	0.166667	0.0740741	0.444444	0.155172	4.15385	0.0634921
GREM1	67	0.179104	0.80597	0.0149254	0.222222	0.0185185	0.0833333	0.218182	4.15385	0.0151515
HADHB_ENST00000545822	67	0.149254	0.80597	0.0447761	0.185185	0.0555556	0.3	0.175439	4.15385	0.046875
MRS2_ENST00000443868	67	0.134328	0.80597	0.0597015	0.166667	0.0740741	0.444444	0.155172	4.15385	0.0634921
OAT	67	0.19403	0.80597	0	0.240741	0	0	0.240741	4.15385	0
RNPS1	67	0.179104	0.80597	0.0149254	0.222222	0.0185185	0.0833333	0.218182	4.15385	0.0151515
SLC10A7_ENST00000394062	67	0.164179	0.80597	0.0298507	0.203704	0.037037	0.181818	0.196429	4.15385	0.0307692
SMARCD1_ENST00000394963	67	0.0597015	0.80597	0.134328	0.0740741	0.166667	2.25	0.0634921	4.15385	0.155172
UBR7	67	0.149254	0.80597	0.0447761	0.185185	0.0555556	0.3	0.175439	4.15385	0.046875
ZFP1	67	0.179104	0.80597	0.0149254	0.222222	0.0185185	0.0833333	0.218182	4.15385	0.0151515
PDE4D_ENST00000507116	134	0.149254	0.80597	0.0447761	0.185185	0.0555556	0.3	0.175439	4.15385	0.046875
WBP11	134	0.156716	0.80597	0.0373134	0.194444	0.0462963	0.238095	0.185841	4.15385	0.0387597
CXCR2	170	0.152941	0.805882	0.0411765	0.189781	0.0510949	0.269231	0.180556	4.15152	0.0429448
ACADS	103	0.184466	0.805825	0.00970874	0.228916	0.0120482	0.0526316	0.22619	4.15	0.00980392
POLE_ENST00000320574	896	0.152902	0.805804	0.0412946	0.189751	0.0512465	0.270073	0.180501	4.14943	0.0430733
OR2J3	139	0.179856	0.805755	0.0143885	0.223214	0.0178571	0.08	0.219298	4.14815	0.0145985
PTPRD_ENST00000537002	1142	0.136602	0.805604	0.0577933	0.169565	0.0717391	0.423077	0.158215	4.14414	0.0613383
B4GALT3	72	0.166667	0.805556	0.0277778	0.206897	0.0344828	0.166667	0.2	4.14286	0.0285714
BTBD7_ENST00000554565	72	0.166667	0.805556	0.0277778	0.206897	0.0344828	0.166667	0.2	4.14286	0.0285714
HLA-F	72	0.194444	0.805556	0	0.241379	0	0	0.241379	4.14286	0
METTL2A_ENST00000311506	72	0.180556	0.805556	0.0138889	0.224138	0.0172414	0.0769231	0.220339	4.14286	0.0140845
MRPS31_ENST00000323563	72	0.111111	0.805556	0.0833333	0.137931	0.103448	0.75	0.125	4.14286	0.0909091
SKP2_ENST00000274254	72	0.138889	0.805556	0.0555556	0.172414	0.0689655	0.4	0.16129	4.14286	0.0588235
CDK11B_ENST00000317673	108	0.175926	0.805556	0.0185185	0.218391	0.0229885	0.105263	0.213483	4.14286	0.0188679
KLHL10	108	0.185185	0.805556	0.00925926	0.229885	0.0114943	0.05	0.227273	4.14286	0.00934579
SERTAD4	108	0.148148	0.805556	0.0462963	0.183908	0.0574713	0.3125	0.173913	4.14286	0.0485437
FGFR1	401	0.164589	0.805486	0.0299252	0.204334	0.0371517	0.181818	0.197015	4.14103	0.0308483
GATA1	221	0.149321	0.80543	0.0452489	0.185393	0.0561798	0.30303	0.175532	4.13953	0.0473934
PROS1	267	0.161049	0.805243	0.0337079	0.2	0.0418605	0.209302	0.191964	4.13462	0.0348837
IFNA7	77	0.181818	0.805195	0.012987	0.225806	0.016129	0.0714286	0.222222	4.13333	0.0131579
KLHDC2	77	0.116883	0.805195	0.0779221	0.145161	0.0967742	0.666667	0.132353	4.13333	0.084507
NEURL1B	77	0.194805	0.805195	0	0.241935	0	0	0.241935	4.13333	0
NEURL1B_ENST00000369800	77	0.194805	0.805195	0	0.241935	0	0	0.241935	4.13333	0
NFKBIA_ENST00000216797	77	0.0779221	0.805195	0.116883	0.0967742	0.145161	1.5	0.084507	4.13333	0.132353
PPP4C	77	0.155844	0.805195	0.038961	0.193548	0.0483871	0.25	0.184615	4.13333	0.0405405
SMEK1_ENST00000417249	154	0.142857	0.805195	0.0519481	0.177419	0.0645161	0.363636	0.166667	4.13333	0.0547945
IFLTD1_ENST00000458174	118	0.161017	0.805085	0.0338983	0.2	0.0421053	0.210526	0.191919	4.13043	0.0350877
RIOK2	118	0.110169	0.805085	0.0847458	0.136842	0.105263	0.769231	0.12381	4.13043	0.0925926
RSPH3	118	0.135593	0.805085	0.059322	0.168421	0.0736842	0.4375	0.156863	4.13043	0.0630631
CX3CL1	82	0.182927	0.804878	0.0121951	0.227273	0.0151515	0.0666667	0.223881	4.125	0.0123457
EARS2	82	0.158537	0.804878	0.0365854	0.19697	0.0454545	0.230769	0.188406	4.125	0.0379747
NELF_ENST00000392812	82	0.195122	0.804878	0	0.242424	0	0	0.242424	4.125	0
PCYT1B_ENST00000356768	82	0.170732	0.804878	0.0243902	0.212121	0.030303	0.142857	0.205882	4.125	0.025
PPM1B_ENST00000378551	82	0.146341	0.804878	0.0487805	0.181818	0.0606061	0.333333	0.171429	4.125	0.0512821
SLC30A7	82	0.195122	0.804878	0	0.242424	0	0	0.242424	4.125	0
ZNF222_ENST00000391960	82	0.134146	0.804878	0.0609756	0.166667	0.0757576	0.454545	0.15493	4.125	0.0649351
DZANK1_ENST00000377630	123	0.170732	0.804878	0.0243902	0.212121	0.030303	0.142857	0.205882	4.125	0.025
TCN1	123	0.162602	0.804878	0.0325203	0.20202	0.040404	0.2	0.194175	4.125	0.0336134
ZNF157	123	0.170732	0.804878	0.0243902	0.212121	0.030303	0.142857	0.205882	4.125	0.025
ESR1_ENST00000544394	210	0.142857	0.804762	0.052381	0.177515	0.0650888	0.366667	0.166667	4.12195	0.0552764
CDC25B	128	0.15625	0.804688	0.0390625	0.194175	0.0485437	0.25	0.185185	4.12	0.0406504
WDR36	215	0.134884	0.804651	0.0604651	0.16763	0.0751445	0.448276	0.155914	4.11905	0.0643564
DBNL_ENST00000468694	87	0.195402	0.804598	0	0.242857	0	0	0.242857	4.11765	0
ENSG00000164236	87	0.172414	0.804598	0.0229885	0.214286	0.0285714	0.133333	0.208333	4.11765	0.0235294
WNT11	87	0.149425	0.804598	0.045977	0.185714	0.0571429	0.307692	0.175676	4.11765	0.0481928
ZNF485_ENST00000361807	87	0.16092	0.804598	0.0344828	0.2	0.0428571	0.214286	0.191781	4.11765	0.0357143
ATR	870	0.114943	0.804598	0.0804598	0.142857	0.1	0.7	0.12987	4.11765	0.0875
FBXW7_ENST00000296555	1018	0.0304519	0.804519	0.165029	0.037851	0.205128	5.41935	0.0314083	4.11558	0.197647
C9orf167	92	0.152174	0.804348	0.0434783	0.189189	0.0540541	0.285714	0.179487	4.11111	0.0454545
MST1P9	92	0.195652	0.804348	0	0.243243	0	0	0.243243	4.11111	0
DAO	138	0.144928	0.804348	0.0507246	0.18018	0.0630631	0.35	0.169492	4.11111	0.0534351
FLT1	741	0.14305	0.804318	0.0526316	0.177852	0.0654362	0.367925	0.166929	4.11034	0.0555556
AQP9	97	0.185567	0.804124	0.0103093	0.230769	0.0128205	0.0555556	0.227848	4.10526	0.0104167
C19orf35	97	0.154639	0.804124	0.0412371	0.192308	0.0512821	0.266667	0.182927	4.10526	0.0430108
FRRS1	97	0.14433	0.804124	0.0515464	0.179487	0.0641026	0.357143	0.168675	4.10526	0.0543478
TIGD5	97	0.164948	0.804124	0.0309278	0.205128	0.0384615	0.1875	0.197531	4.10526	0.0319149
EPC1	194	0.154639	0.804124	0.0412371	0.192308	0.0512821	0.266667	0.182927	4.10526	0.0430108
FBXW7	1332	0.027027	0.804054	0.168919	0.0336134	0.210084	6.25	0.0277778	4.10345	0.203252
ACP1	51	0.156863	0.803922	0.0392157	0.195122	0.0487805	0.25	0.186047	4.1	0.0408163
ADAL_ENST00000428046	51	0.137255	0.803922	0.0588235	0.170732	0.0731707	0.428571	0.159091	4.1	0.0625
C6orf136	51	0.156863	0.803922	0.0392157	0.195122	0.0487805	0.25	0.186047	4.1	0.0408163
CBFA2T2_ENST00000397798	51	0.196078	0.803922	0	0.243902	0	0	0.243902	4.1	0
CXorf26	51	0.137255	0.803922	0.0588235	0.170732	0.0731707	0.428571	0.159091	4.1	0.0625
DNASE2B_ENST00000370665	51	0.117647	0.803922	0.0784314	0.146341	0.097561	0.666667	0.133333	4.1	0.0851064
DSCR3	51	0.176471	0.803922	0.0196078	0.219512	0.0243902	0.111111	0.214286	4.1	0.02
METTL7B	51	0.156863	0.803922	0.0392157	0.195122	0.0487805	0.25	0.186047	4.1	0.0408163
NUP43_ENST00000367403	51	0.156863	0.803922	0.0392157	0.195122	0.0487805	0.25	0.186047	4.1	0.0408163
OR2T5	51	0.196078	0.803922	0	0.243902	0	0	0.243902	4.1	0
SLC25A27_ENST00000411689	51	0.117647	0.803922	0.0784314	0.146341	0.097561	0.666667	0.133333	4.1	0.0851064
FAM154B	102	0.186275	0.803922	0.00980392	0.231707	0.0121951	0.0526316	0.228916	4.1	0.00990099
LRRC37A2	102	0.176471	0.803922	0.0196078	0.219512	0.0243902	0.111111	0.214286	4.1	0.02
WIF1	102	0.147059	0.803922	0.0490196	0.182927	0.0609756	0.333333	0.172414	4.1	0.0515464
HPS3	209	0.191388	0.803828	0.00478469	0.238095	0.00595238	0.025	0.236686	4.09756	0.00480769
CKAP5_ENST00000415402	158	0.164557	0.803797	0.0316456	0.204724	0.0393701	0.192308	0.19697	4.09677	0.0326797
FAM161A_ENST00000405894	158	0.132911	0.803797	0.0632911	0.165354	0.0787402	0.47619	0.153285	4.09677	0.0675676
ZNF546	158	0.158228	0.803797	0.0379747	0.19685	0.0472441	0.24	0.18797	4.09677	0.0394737
PSD3	107	0.168224	0.803738	0.0280374	0.209302	0.0348837	0.166667	0.202247	4.09524	0.0288462
TRIM24_ENST00000378381	107	0.149533	0.803738	0.046729	0.186047	0.0581395	0.3125	0.175824	4.09524	0.0490196
C11orf40	56	0.142857	0.803571	0.0535714	0.177778	0.0666667	0.375	0.166667	4.09091	0.0566038
DTWD1	56	0.160714	0.803571	0.0357143	0.2	0.0444444	0.222222	0.191489	4.09091	0.037037
ELAC1	56	0.160714	0.803571	0.0357143	0.2	0.0444444	0.222222	0.191489	4.09091	0.037037
GML	56	0.160714	0.803571	0.0357143	0.2	0.0444444	0.222222	0.191489	4.09091	0.037037
LARP1B_ENST00000432347	56	0.160714	0.803571	0.0357143	0.2	0.0444444	0.222222	0.191489	4.09091	0.037037
PPP1R8	56	0.196429	0.803571	0	0.244444	0	0	0.244444	4.09091	0
PRKRA	56	0.0892857	0.803571	0.107143	0.111111	0.133333	1.2	0.0980392	4.09091	0.12
STX8	56	0.125	0.803571	0.0714286	0.155556	0.0888889	0.571429	0.142857	4.09091	0.0769231
VCX3B_ENST00000381029	56	0.142857	0.803571	0.0535714	0.177778	0.0666667	0.375	0.166667	4.09091	0.0566038
ADCK5	112	0.178571	0.803571	0.0178571	0.222222	0.0222222	0.1	0.217391	4.09091	0.0181818
ULK2	173	0.150289	0.803468	0.0462428	0.18705	0.057554	0.307692	0.176871	4.08824	0.0484848
KIAA0020	117	0.145299	0.803419	0.0512821	0.180851	0.0638298	0.352941	0.17	4.08696	0.0540541
OR5V1	117	0.162393	0.803419	0.034188	0.202128	0.0425532	0.210526	0.193878	4.08696	0.0353982
SLU7	117	0.136752	0.803419	0.0598291	0.170213	0.0744681	0.4375	0.158416	4.08696	0.0636364
ZFP30	117	0.128205	0.803419	0.0683761	0.159574	0.0851064	0.533333	0.147059	4.08696	0.0733945
CMTM2	61	0.163934	0.803279	0.0327869	0.204082	0.0408163	0.2	0.196078	4.08333	0.0338983
LFNG_ENST00000222725	61	0.196721	0.803279	0	0.244898	0	0	0.244898	4.08333	0
MAK16	61	0.180328	0.803279	0.0163934	0.22449	0.0204082	0.0909091	0.22	4.08333	0.0166667
MFAP5	61	0.180328	0.803279	0.0163934	0.22449	0.0204082	0.0909091	0.22	4.08333	0.0166667
CDC25B_ENST00000245960	122	0.155738	0.803279	0.0409836	0.193878	0.0510204	0.263158	0.184466	4.08333	0.042735
GFPT1_ENST00000357308	122	0.172131	0.803279	0.0245902	0.214286	0.0306122	0.142857	0.207921	4.08333	0.0252101
KRTAP13-1	122	0.172131	0.803279	0.0245902	0.214286	0.0306122	0.142857	0.207921	4.08333	0.0252101
ZNF529_ENST00000334116	122	0.163934	0.803279	0.0327869	0.204082	0.0408163	0.2	0.196078	4.08333	0.0338983
C10orf28	127	0.141732	0.80315	0.0551181	0.176471	0.0686275	0.388889	0.165138	4.08	0.0583333
ZNF529_ENST00000396897	127	0.165354	0.80315	0.0314961	0.205882	0.0392157	0.190476	0.198113	4.08	0.0325203
RAG2	193	0.165803	0.803109	0.0310881	0.206452	0.0387097	0.1875	0.198758	4.07895	0.0320856
BLM	391	0.148338	0.803069	0.0485934	0.184713	0.0605096	0.327586	0.174174	4.07792	0.0510753
ACOT4	66	0.151515	0.80303	0.0454545	0.188679	0.0566038	0.3	0.178571	4.07692	0.047619
CRYZL1	66	0.121212	0.80303	0.0757576	0.150943	0.0943396	0.625	0.137931	4.07692	0.0819672
EIF4E1B	66	0.181818	0.80303	0.0151515	0.226415	0.0188679	0.0833333	0.222222	4.07692	0.0153846
EYA3_ENST00000373863	66	0.136364	0.80303	0.0606061	0.169811	0.0754717	0.444444	0.157895	4.07692	0.0645161
KHK_ENST00000260598	66	0.151515	0.80303	0.0454545	0.188679	0.0566038	0.3	0.178571	4.07692	0.047619
RNPC3	66	0.136364	0.80303	0.0606061	0.169811	0.0754717	0.444444	0.157895	4.07692	0.0645161
SLC10A7	66	0.151515	0.80303	0.0454545	0.188679	0.0566038	0.3	0.178571	4.07692	0.047619
TWF1_ENST00000548315	66	0.166667	0.80303	0.030303	0.207547	0.0377358	0.181818	0.2	4.07692	0.03125
VPS4A	66	0.151515	0.80303	0.0454545	0.188679	0.0566038	0.3	0.178571	4.07692	0.047619
BMPR1B	132	0.159091	0.80303	0.0378788	0.198113	0.0471698	0.238095	0.189189	4.07692	0.0393701
ROS1	1203	0.128013	0.802993	0.0689942	0.15942	0.0859213	0.538961	0.146806	4.07595	0.0741071
DZANK1_ENST00000357236	137	0.175182	0.80292	0.0218978	0.218182	0.0272727	0.125	0.212389	4.07407	0.0223881
PON3	137	0.182482	0.80292	0.0145985	0.227273	0.0181818	0.08	0.223214	4.07407	0.0148148
ARL13B	71	0.140845	0.802817	0.056338	0.175439	0.0701754	0.4	0.163934	4.07143	0.0597015
ATXN1L	71	0.15493	0.802817	0.0422535	0.192982	0.0526316	0.272727	0.183333	4.07143	0.0441176
FBXO33	71	0.15493	0.802817	0.0422535	0.192982	0.0526316	0.272727	0.183333	4.07143	0.0441176
GAD1_ENST00000375272	71	0.169014	0.802817	0.028169	0.210526	0.0350877	0.166667	0.20339	4.07143	0.0289855
HIST1H3F	71	0.197183	0.802817	0	0.245614	0	0	0.245614	4.07143	0
KRTAP16-1	71	0.169014	0.802817	0.028169	0.210526	0.0350877	0.166667	0.20339	4.07143	0.0289855
TFDP1_ENST00000544902	71	0.15493	0.802817	0.0422535	0.192982	0.0526316	0.272727	0.183333	4.07143	0.0441176
C16orf11	142	0.176056	0.802817	0.0211268	0.219298	0.0263158	0.12	0.213675	4.07143	0.0215827
C20orf151	142	0.183099	0.802817	0.0140845	0.22807	0.0175439	0.0769231	0.224138	4.07143	0.0142857
SLC2A13	142	0.161972	0.802817	0.0352113	0.201754	0.0438596	0.217391	0.193277	4.07143	0.0364964
BUB1	213	0.173709	0.802817	0.0234742	0.216374	0.0292398	0.135135	0.210227	4.07143	0.0240385
C1GALT1C1	76	0.131579	0.802632	0.0657895	0.163934	0.0819672	0.5	0.151515	4.06667	0.0704225
GGH	76	0.157895	0.802632	0.0394737	0.196721	0.0491803	0.25	0.1875	4.06667	0.0410959
HAT1	76	0.171053	0.802632	0.0263158	0.213115	0.0327869	0.153846	0.206349	4.06667	0.027027
STARD7_ENST00000337288	76	0.197368	0.802632	0	0.245902	0	0	0.245902	4.06667	0
ZNF185	76	0.184211	0.802632	0.0131579	0.229508	0.0163934	0.0714286	0.225806	4.06667	0.0133333
ZNF562_ENST00000453372	76	0.131579	0.802632	0.0657895	0.163934	0.0819672	0.5	0.151515	4.06667	0.0704225
TEKT3	152	0.171053	0.802632	0.0263158	0.213115	0.0327869	0.153846	0.206349	4.06667	0.027027
HNF4G	228	0.149123	0.802632	0.0482456	0.185792	0.0601093	0.323529	0.175258	4.06667	0.0506912
CSNK1G3	81	0.17284	0.802469	0.0246914	0.215385	0.0307692	0.142857	0.208955	4.0625	0.0253165
DAB2IP_ENST00000408936	81	0.17284	0.802469	0.0246914	0.215385	0.0307692	0.142857	0.208955	4.0625	0.0253165
GSG1_ENST00000351606	81	0.148148	0.802469	0.0493827	0.184615	0.0615385	0.333333	0.173913	4.0625	0.0519481
WDR41	81	0.148148	0.802469	0.0493827	0.184615	0.0615385	0.333333	0.173913	4.0625	0.0519481
ZNF367	81	0.148148	0.802469	0.0493827	0.184615	0.0615385	0.333333	0.173913	4.0625	0.0519481
ZFP37	162	0.160494	0.802469	0.037037	0.2	0.0461538	0.230769	0.191176	4.0625	0.0384615
KIAA1967	167	0.185629	0.802395	0.011976	0.231343	0.0149254	0.0645161	0.227941	4.06061	0.0121212
TRPM6_ENST00000376864	253	0.146245	0.802372	0.0513834	0.182266	0.0640394	0.351351	0.171296	4.06	0.0541667
BBOX1	86	0.162791	0.802326	0.0348837	0.202899	0.0434783	0.214286	0.194444	4.05882	0.0361446
KRTAP4-11	86	0.186047	0.802326	0.0116279	0.231884	0.0144928	0.0625	0.228571	4.05882	0.0117647
MBP	86	0.174419	0.802326	0.0232558	0.217391	0.0289855	0.133333	0.211268	4.05882	0.0238095
TCHP_ENST00000312777	86	0.116279	0.802326	0.0813953	0.144928	0.101449	0.7	0.131579	4.05882	0.0886076
TPST1	86	0.116279	0.802326	0.0813953	0.144928	0.101449	0.7	0.131579	4.05882	0.0886076
C6orf165_ENST00000369562	177	0.158192	0.80226	0.039548	0.197183	0.0492958	0.25	0.187919	4.05714	0.0411765
IRS1	450	0.175556	0.802222	0.0222222	0.218837	0.0277008	0.126582	0.212938	4.05618	0.0227273
ABHD13	91	0.131868	0.802198	0.0659341	0.164384	0.0821918	0.5	0.151899	4.05556	0.0705882
SLC36A4	91	0.142857	0.802198	0.0549451	0.178082	0.0684932	0.384615	0.166667	4.05556	0.0581395
ANKRD31_ENST00000274361	182	0.10989	0.802198	0.0879121	0.136986	0.109589	0.8	0.123457	4.05556	0.0963855
MTRR	182	0.159341	0.802198	0.0384615	0.19863	0.0479452	0.241379	0.189542	4.05556	0.04
INPP4B	374	0.136364	0.802139	0.0614973	0.17	0.0766667	0.45098	0.157895	4.05405	0.0655271
MYO9A	470	0.140426	0.802128	0.0574468	0.175066	0.071618	0.409091	0.163366	4.05376	0.0609481
MED17	96	0.09375	0.802083	0.104167	0.116883	0.12987	1.11111	0.103448	4.05263	0.116279
PKN2_ENST00000316005	96	0.145833	0.802083	0.0520833	0.181818	0.0649351	0.357143	0.170732	4.05263	0.0549451
Q6ZTY5_HUMAN	96	0.166667	0.802083	0.03125	0.207792	0.038961	0.1875	0.2	4.05263	0.0322581
FBXW7_NM_018315_2	1081	0.0370028	0.802035	0.160962	0.0461361	0.200692	4.35	0.0384246	4.0514	0.191841
KCTD18	101	0.158416	0.80198	0.039604	0.197531	0.0493827	0.25	0.188235	4.05	0.0412371
OR14A16	202	0.183168	0.80198	0.0148515	0.228395	0.0185185	0.0810811	0.224242	4.05	0.0150754
ZFYVE16	202	0.138614	0.80198	0.0594059	0.17284	0.0740741	0.428571	0.16092	4.05	0.0631579
GOPC_ENST00000535237	106	0.160377	0.801887	0.0377358	0.2	0.0470588	0.235294	0.191011	4.04762	0.0392157
POLH	106	0.150943	0.801887	0.0471698	0.188235	0.0588235	0.3125	0.177778	4.04762	0.049505
PVRL3_ENST00000493615	106	0.122642	0.801887	0.0754717	0.152941	0.0941176	0.615385	0.139785	4.04762	0.0816327
GPR107_ENST00000372406	111	0.153153	0.801802	0.045045	0.191011	0.0561798	0.294118	0.180851	4.04545	0.0471698
PARM1	111	0.18018	0.801802	0.018018	0.224719	0.0224719	0.1	0.21978	4.04545	0.0183486
AARSD1	116	0.163793	0.801724	0.0344828	0.204301	0.0430108	0.210526	0.195876	4.04348	0.0357143
DDX31_ENST00000310532	116	0.172414	0.801724	0.0258621	0.215054	0.0322581	0.15	0.208333	4.04348	0.0265487
ARHGEF37	121	0.165289	0.801653	0.0330579	0.206186	0.0412371	0.2	0.19802	4.04167	0.034188
HNRNPK_ENST00000376264	121	0.165289	0.801653	0.0330579	0.206186	0.0412371	0.2	0.19802	4.04167	0.034188
MARVELD2	121	0.173554	0.801653	0.0247934	0.216495	0.0309278	0.142857	0.21	4.04167	0.0254237
PDE4D_ENST00000360047	121	0.14876	0.801653	0.0495868	0.185567	0.0618557	0.333333	0.174757	4.04167	0.0521739
CYP3A43	126	0.166667	0.801587	0.031746	0.207921	0.039604	0.190476	0.2	4.04	0.0327869
ERRFI1	131	0.122137	0.801527	0.0763359	0.152381	0.0952381	0.625	0.13913	4.03846	0.0826446
CAPRIN1	136	0.139706	0.801471	0.0588235	0.174312	0.0733945	0.421053	0.162393	4.03704	0.0625
TAF7L	136	0.154412	0.801471	0.0441176	0.192661	0.0550459	0.285714	0.182609	4.03704	0.0461538
INTS6	141	0.156028	0.801418	0.0425532	0.19469	0.0530973	0.272727	0.184874	4.03571	0.0444444
ERG_ENST00000417133	282	0.156028	0.801418	0.0425532	0.19469	0.0530973	0.272727	0.184874	4.03571	0.0444444
ATP6V1A	151	0.15894	0.801325	0.0397351	0.198347	0.0495868	0.25	0.188976	4.03333	0.0413793
SMARCA4_ENST00000358026	1057	0.116367	0.801325	0.0823084	0.145218	0.102715	0.707317	0.131692	4.03333	0.0896907
MFN2	156	0.173077	0.801282	0.025641	0.216	0.032	0.148148	0.209302	4.03226	0.0263158
EIF2C4	161	0.136646	0.801242	0.0621118	0.170543	0.0775194	0.454545	0.158273	4.03125	0.0662252
MEF2BNB-MEF2B	166	0.186747	0.801205	0.0120482	0.233083	0.0150376	0.0645161	0.22963	4.0303	0.0121951
IGF1R	543	0.165746	0.801105	0.0331492	0.206897	0.0413793	0.2	0.198675	4.02778	0.0342857
ITCH	186	0.139785	0.801075	0.0591398	0.174497	0.0738255	0.423077	0.1625	4.02703	0.0628571
SH2B3	191	0.151832	0.801047	0.0471204	0.189542	0.0588235	0.310345	0.179012	4.02632	0.0494505
CEP170_ENST00000366543	201	0.164179	0.800995	0.0348259	0.204969	0.0434783	0.212121	0.196429	4.025	0.0360825
PITRM1	201	0.179104	0.800995	0.0199005	0.223602	0.0248447	0.111111	0.218182	4.025	0.0203046
SUV420H1_ENST00000304363	211	0.137441	0.800948	0.0616114	0.171598	0.0769231	0.448276	0.159341	4.02381	0.0656566
PCDH11Y_ENST00000215473	216	0.189815	0.800926	0.00925926	0.236994	0.0115607	0.0487805	0.234286	4.02326	0.00934579
ITGA2_ENST00000296585	231	0.17316	0.800866	0.025974	0.216216	0.0324324	0.15	0.209424	4.02174	0.0266667
PABPC1	236	0.177966	0.800847	0.0211864	0.222222	0.026455	0.119048	0.216495	4.02128	0.021645
CARD11	993	0.166163	0.800604	0.0332326	0.207547	0.0415094	0.2	0.199275	4.01515	0.034375
PTPRD_ENST00000397617	1122	0.141711	0.800357	0.0579323	0.17706	0.0723831	0.408805	0.165109	4.00893	0.0614948
ANKRD29	50	0.16	0.8	0.04	0.2	0.05	0.25	0.190476	4	0.0416667
ATP6V1D	50	0.14	0.8	0.06	0.175	0.075	0.428571	0.162791	4	0.0638298
DTD1	50	0.18	0.8	0.02	0.225	0.025	0.111111	0.219512	4	0.0204082
ENPP3_ENST00000427148	50	0.12	0.8	0.08	0.15	0.1	0.666667	0.136364	4	0.0869565
GALP	50	0.16	0.8	0.04	0.2	0.05	0.25	0.190476	4	0.0416667
HDGFRP3	50	0.18	0.8	0.02	0.225	0.025	0.111111	0.219512	4	0.0204082
LCE5A	50	0.14	0.8	0.06	0.175	0.075	0.428571	0.162791	4	0.0638298
LRRC26	50	0.2	0.8	0	0.25	0	0	0.25	4	0
TIMMDC1	50	0.1	0.8	0.1	0.125	0.125	1	0.111111	4	0.111111
AGA	55	0.145455	0.8	0.0545455	0.181818	0.0681818	0.375	0.170213	4	0.0576923
ATP5F1	55	0.145455	0.8	0.0545455	0.181818	0.0681818	0.375	0.170213	4	0.0576923
C4orf29_ENST00000398965	55	0.109091	0.8	0.0909091	0.136364	0.113636	0.833333	0.122449	4	0.1
LYL1	55	0.2	0.8	0	0.25	0	0	0.25	4	0
NKAIN2_ENST00000545433	55	0.181818	0.8	0.0181818	0.227273	0.0227273	0.1	0.222222	4	0.0185185
RHBDL2_ENST00000372985	55	0.181818	0.8	0.0181818	0.227273	0.0227273	0.1	0.222222	4	0.0185185
SERPINB11	55	0.2	0.8	0	0.25	0	0	0.25	4	0
TDGF1	55	0.2	0.8	0	0.25	0	0	0.25	4	0
TMEM192	55	0.2	0.8	0	0.25	0	0	0.25	4	0
C1orf105	60	0.133333	0.8	0.0666667	0.166667	0.0833333	0.5	0.153846	4	0.0714286
C9orf3_ENST00000424143	60	0.15	0.8	0.05	0.1875	0.0625	0.333333	0.176471	4	0.0526316
CCP110_ENST00000381396	60	0.166667	0.8	0.0333333	0.208333	0.0416667	0.2	0.2	4	0.0344828
CDK7	60	0.116667	0.8	0.0833333	0.145833	0.104167	0.714286	0.132075	4	0.0909091
ENSG00000198153	60	0.183333	0.8	0.0166667	0.229167	0.0208333	0.0909091	0.22449	4	0.0169492
ITM2B	60	0.166667	0.8	0.0333333	0.208333	0.0416667	0.2	0.2	4	0.0344828
KPNA6_ENST00000545542	60	0.15	0.8	0.05	0.1875	0.0625	0.333333	0.176471	4	0.0526316
RALB_ENST00000474855	60	0.183333	0.8	0.0166667	0.229167	0.0208333	0.0909091	0.22449	4	0.0169492
RBM7	60	0.1	0.8	0.1	0.125	0.125	1	0.111111	4	0.111111
RNFT1_ENST00000305783	60	0.15	0.8	0.05	0.1875	0.0625	0.333333	0.176471	4	0.0526316
RP11-529J17.2	60	0.2	0.8	0	0.25	0	0	0.25	4	0
RP11-529J17.2_ENST00000562295	60	0.2	0.8	0	0.25	0	0	0.25	4	0
C1orf141_ENST00000448166	65	0.123077	0.8	0.0769231	0.153846	0.0961538	0.625	0.140351	4	0.0833333
CD274	65	0.153846	0.8	0.0461538	0.192308	0.0576923	0.3	0.181818	4	0.0483871
IGFBP2	65	0.184615	0.8	0.0153846	0.230769	0.0192308	0.0833333	0.226415	4	0.015625
ZNF524	65	0.2	0.8	0	0.25	0	0	0.25	4	0
ZNF589	65	0.123077	0.8	0.0769231	0.153846	0.0961538	0.625	0.140351	4	0.0833333
MIER1_ENST00000371014	70	0.171429	0.8	0.0285714	0.214286	0.0357143	0.166667	0.206897	4	0.0294118
RBM17	70	0.171429	0.8	0.0285714	0.214286	0.0357143	0.166667	0.206897	4	0.0294118
TNFRSF6B	70	0.185714	0.8	0.0142857	0.232143	0.0178571	0.0769231	0.22807	4	0.0144928
ATG4A	75	0.133333	0.8	0.0666667	0.166667	0.0833333	0.5	0.153846	4	0.0714286
ATG4A_ENST00000372232	75	0.133333	0.8	0.0666667	0.166667	0.0833333	0.5	0.153846	4	0.0714286
ZNF821	75	0.16	0.8	0.04	0.2	0.05	0.25	0.190476	4	0.0416667
ATXN3	80	0.15	0.8	0.05	0.1875	0.0625	0.333333	0.176471	4	0.0526316
DNAJB2	80	0.1625	0.8	0.0375	0.203125	0.046875	0.230769	0.19403	4	0.038961
METTL17	80	0.1375	0.8	0.0625	0.171875	0.078125	0.454545	0.15942	4	0.0666667
PDLIM1	80	0.15	0.8	0.05	0.1875	0.0625	0.333333	0.176471	4	0.0526316
SUMF2	80	0.1875	0.8	0.0125	0.234375	0.015625	0.0666667	0.230769	4	0.0126582
BOLL_ENST00000321801	85	0.2	0.8	0	0.25	0	0	0.25	4	0
ERI2_ENST00000357967	85	0.129412	0.8	0.0705882	0.161765	0.0882353	0.545455	0.148649	4	0.0759494
GNB2	85	0.164706	0.8	0.0352941	0.205882	0.0441176	0.214286	0.197183	4	0.0365854
PGGT1B	85	0.141176	0.8	0.0588235	0.176471	0.0735294	0.416667	0.164384	4	0.0625
ZFP3	85	0.129412	0.8	0.0705882	0.161765	0.0882353	0.545455	0.148649	4	0.0759494
ACP6	90	0.144444	0.8	0.0555556	0.180556	0.0694444	0.384615	0.168831	4	0.0588235
SAAL1	90	0.177778	0.8	0.0222222	0.222222	0.0277778	0.125	0.216216	4	0.0227273
HADHB	100	0.15	0.8	0.05	0.1875	0.0625	0.333333	0.176471	4	0.0526316
PGBD3	100	0.15	0.8	0.05	0.1875	0.0625	0.333333	0.176471	4	0.0526316
WIF1_ENST00000286574	105	0.152381	0.8	0.047619	0.190476	0.0595238	0.3125	0.179775	4	0.05
PNPLA5	120	0.158333	0.8	0.0416667	0.197917	0.0520833	0.263158	0.188119	4	0.0434783
MSL3	125	0.152	0.8	0.048	0.19	0.06	0.315789	0.179245	4	0.0504202
DDX4_ENST00000511853	130	0.115385	0.8	0.0846154	0.144231	0.105769	0.733333	0.130435	4	0.092437
PRB4	130	0.138462	0.8	0.0615385	0.173077	0.0769231	0.444444	0.160714	4	0.0655738
ZNF17	130	0.184615	0.8	0.0153846	0.230769	0.0192308	0.0833333	0.226415	4	0.015625
EIF4A2	150	0.153333	0.8	0.0466667	0.191667	0.0583333	0.304348	0.181102	4	0.048951
XPC	150	0.173333	0.8	0.0266667	0.216667	0.0333333	0.153846	0.209677	4	0.0273973
SPARCL1	155	0.167742	0.8	0.0322581	0.209677	0.0403226	0.192308	0.20155	4	0.0333333
SPAG1	160	0.125	0.8	0.075	0.15625	0.09375	0.6	0.142857	4	0.0810811
CCND1	165	0.133333	0.8	0.0666667	0.166667	0.0833333	0.5	0.153846	4	0.0714286
PCDH11Y	165	0.193939	0.8	0.00606061	0.242424	0.00757576	0.03125	0.240602	4	0.00609756
PPP6C_ENST00000451402	165	0.0787879	0.8	0.121212	0.0984848	0.151515	1.53846	0.0855263	4	0.137931
ZNF141	165	0.169697	0.8	0.030303	0.212121	0.0378788	0.178571	0.20438	4	0.03125
ARHGEF7_ENST00000375741	175	0.165714	0.8	0.0342857	0.207143	0.0428571	0.206897	0.19863	4	0.035503
WSCD1	175	0.171429	0.8	0.0285714	0.214286	0.0357143	0.166667	0.206897	4	0.0294118
PPP1R12B	190	0.131579	0.8	0.0684211	0.164474	0.0855263	0.52	0.151515	4	0.0734463
ZBTB41	205	0.165854	0.8	0.0341463	0.207317	0.0426829	0.205882	0.19883	4	0.0353535
EIF2AK3_ENST00000303236	225	0.142222	0.8	0.0577778	0.177778	0.0722222	0.40625	0.165803	4	0.0613208
PLK2	225	0.102222	0.8	0.0977778	0.127778	0.122222	0.956522	0.113861	4	0.108374
RPTOR	520	0.161538	0.8	0.0384615	0.201923	0.0480769	0.238095	0.192661	4	0.04
KIAA0913_ENST00000398706	359	0.167131	0.799443	0.0334262	0.209059	0.0418118	0.2	0.200669	3.98611	0.0345821
DNMT1_ENST00000359526	339	0.150442	0.79941	0.0501475	0.188192	0.0627306	0.333333	0.177083	3.98529	0.052795
C20orf194	239	0.146444	0.799163	0.0543933	0.183246	0.0680628	0.371429	0.171569	3.97917	0.0575221
MRE11A_ENST00000323929	239	0.125523	0.799163	0.0753138	0.157068	0.0942408	0.6	0.143541	3.97917	0.081448
TIF1	239	0.154812	0.799163	0.0460251	0.193717	0.0575916	0.297297	0.183168	3.97917	0.0482456
EIF2AK3	219	0.141553	0.799087	0.0593607	0.177143	0.0742857	0.419355	0.164894	3.97727	0.0631068
SMARCC1	214	0.163551	0.799065	0.0373832	0.204678	0.0467836	0.228571	0.195531	3.97674	0.038835
NUP98	378	0.161376	0.798942	0.0396825	0.201987	0.0496689	0.245902	0.192429	3.97368	0.0413223
KCNJ8	169	0.171598	0.798817	0.0295858	0.214815	0.037037	0.172414	0.207143	3.97059	0.0304878
AURKA	159	0.100629	0.798742	0.100629	0.125984	0.125984	1	0.111888	3.96875	0.111888
CCDC148	154	0.136364	0.798701	0.0649351	0.170732	0.0813008	0.47619	0.157895	3.96774	0.0694444
PAPOLG	144	0.152778	0.798611	0.0486111	0.191304	0.0608696	0.318182	0.180328	3.96552	0.0510949
KRT17	139	0.172662	0.798561	0.028777	0.216216	0.036036	0.166667	0.208696	3.96429	0.0296296
PVRL3	139	0.143885	0.798561	0.057554	0.18018	0.0720721	0.4	0.168067	3.96429	0.0610687
WHSC1_ENST00000503128	134	0.186567	0.798507	0.0149254	0.233645	0.0186916	0.08	0.229358	3.96296	0.0151515
OR2M3	263	0.190114	0.798479	0.0114068	0.238095	0.0142857	0.06	0.234742	3.96226	0.0115385
TBC1D12	129	0.139535	0.79845	0.0620155	0.174757	0.0776699	0.444444	0.162162	3.96154	0.0661157
BRCA1	630	0.107937	0.798413	0.0936508	0.135189	0.117296	0.867647	0.120996	3.96063	0.103327
ATAD3A	124	0.185484	0.798387	0.016129	0.232323	0.020202	0.0869565	0.227723	3.96	0.0163934
FLCN_ENST00000389169	124	0.169355	0.798387	0.0322581	0.212121	0.040404	0.190476	0.203883	3.96	0.0333333
LRRC3B	124	0.193548	0.798387	0.00806452	0.242424	0.010101	0.0416667	0.24	3.96	0.00813008
NEXN_ENST00000457030	124	0.16129	0.798387	0.0403226	0.20202	0.0505051	0.25	0.192308	3.96	0.0420168
SPRY3_ENST00000302805	124	0.169355	0.798387	0.0322581	0.212121	0.040404	0.190476	0.203883	3.96	0.0333333
COL11A1_ENST00000370096	1106	0.168174	0.798373	0.0334539	0.210646	0.0419026	0.198925	0.202174	3.95964	0.0346118
NRD1_ENST00000544028	119	0.168067	0.798319	0.0336134	0.210526	0.0421053	0.2	0.20202	3.95833	0.0347826
TFDP1	119	0.159664	0.798319	0.0420168	0.2	0.0526316	0.263158	0.19	3.95833	0.0438596
INHBA	357	0.156863	0.798319	0.0448179	0.196491	0.0561404	0.285714	0.186047	3.95833	0.0469208
VPS13A	585	0.152137	0.798291	0.0495726	0.190578	0.0620985	0.325843	0.179435	3.95763	0.0521583
CEP170	223	0.165919	0.798206	0.0358744	0.207865	0.0449438	0.216216	0.198925	3.95556	0.0372093
FBXW11	109	0.12844	0.798165	0.0733945	0.16092	0.091954	0.571429	0.147368	3.95455	0.0792079
SPECC1_ENST00000395530	109	0.174312	0.798165	0.0275229	0.218391	0.0344828	0.157895	0.211111	3.95455	0.0283019
GALC_ENST00000393569	104	0.163462	0.798077	0.0384615	0.204819	0.0481928	0.235294	0.195402	3.95238	0.04
KIF2A	104	0.144231	0.798077	0.0576923	0.180723	0.0722892	0.4	0.168539	3.95238	0.0612245
FBXW7_ENST00000281708	1124	0.0311388	0.798043	0.170819	0.039019	0.214047	5.48571	0.0321396	3.95154	0.206009
FLT1_ENST00000539099	302	0.162252	0.798013	0.0397351	0.20332	0.0497925	0.244898	0.193676	3.95082	0.0413793
C3orf58	99	0.151515	0.79798	0.0505051	0.189873	0.0632911	0.333333	0.178571	3.95	0.0531915
MLL5_ENST00000476671	99	0.161616	0.79798	0.040404	0.202532	0.0506329	0.25	0.192771	3.95	0.0421053
NRG1_ENST00000520502	99	0.20202	0.79798	0	0.253165	0	0	0.253165	3.95	0
TUBGCP3	198	0.141414	0.79798	0.0606061	0.177215	0.0759494	0.428571	0.164706	3.95	0.0645161
VWDE	198	0.136364	0.79798	0.0656566	0.170886	0.0822785	0.481481	0.157895	3.95	0.0702703
KIAA1468_ENST00000256858	193	0.176166	0.797927	0.0259067	0.220779	0.0324675	0.147059	0.213836	3.94872	0.0265957
LTA4H	94	0.170213	0.797872	0.0319149	0.213333	0.04	0.1875	0.205128	3.94737	0.032967
RAD17_ENST00000509734	94	0.138298	0.797872	0.0638298	0.173333	0.08	0.461538	0.160494	3.94737	0.0681818
COL11A1	1123	0.168299	0.797863	0.0338379	0.210938	0.0424107	0.201058	0.202355	3.94714	0.035023
N4BP2	277	0.151625	0.797834	0.0505415	0.190045	0.0633484	0.333333	0.178723	3.94643	0.0532319
ACVR1B	183	0.114754	0.797814	0.0874317	0.143836	0.109589	0.761905	0.12963	3.94595	0.0958084
KHDRBS2	272	0.176471	0.797794	0.0257353	0.221198	0.0322581	0.145833	0.214286	3.94545	0.0264151
ROS1_ENST00000368507	1167	0.129392	0.797772	0.0728363	0.162191	0.0912997	0.562914	0.148622	3.94492	0.0785582
C5orf54	89	0.146067	0.797753	0.0561798	0.183099	0.0704225	0.384615	0.171053	3.94444	0.0595238
CAST_ENST00000338252	89	0.157303	0.797753	0.0449438	0.197183	0.056338	0.285714	0.186667	3.94444	0.0470588
DBNL	89	0.191011	0.797753	0.011236	0.239437	0.0140845	0.0588235	0.236111	3.94444	0.0113636
HLA-F_ENST00000259951	89	0.202247	0.797753	0	0.253521	0	0	0.253521	3.94444	0
VRK2	89	0.157303	0.797753	0.0449438	0.197183	0.056338	0.285714	0.186667	3.94444	0.0470588
SMARCA5	178	0.146067	0.797753	0.0561798	0.183099	0.0704225	0.384615	0.171053	3.94444	0.0595238
TSPAN5	84	0.166667	0.797619	0.0357143	0.208955	0.0447761	0.214286	0.2	3.94118	0.037037
BRCA2_ENST00000544455	1082	0.108133	0.797597	0.0942699	0.135574	0.118192	0.871795	0.121244	3.94064	0.104082
CNST	163	0.171779	0.797546	0.0306748	0.215385	0.0384615	0.178571	0.207407	3.93939	0.0316456
ADH4	79	0.177215	0.797468	0.0253165	0.222222	0.031746	0.142857	0.215385	3.9375	0.025974
DSTYK	79	0.164557	0.797468	0.0379747	0.206349	0.047619	0.230769	0.19697	3.9375	0.0394737
HNRNPH2	79	0.164557	0.797468	0.0379747	0.206349	0.047619	0.230769	0.19697	3.9375	0.0394737
ZNF222	79	0.126582	0.797468	0.0759494	0.15873	0.0952381	0.6	0.144928	3.9375	0.0821918
PCDH11Y_ENST00000362095	158	0.202532	0.797468	0	0.253968	0	0	0.253968	3.9375	0
DZANK1	153	0.163399	0.797386	0.0392157	0.204918	0.0491803	0.24	0.195312	3.93548	0.0408163
ZFP82_ENST00000392171	153	0.176471	0.797386	0.0261438	0.221311	0.0327869	0.148148	0.214286	3.93548	0.0268456
C2orf81	74	0.175676	0.797297	0.027027	0.220339	0.0338983	0.153846	0.213115	3.93333	0.0277778
C3orf70	74	0.189189	0.797297	0.0135135	0.237288	0.0169492	0.0714286	0.233333	3.93333	0.0136986
STK4_ENST00000372801	74	0.121622	0.797297	0.0810811	0.152542	0.101695	0.666667	0.138462	3.93333	0.0882353
DENND4C_ENST00000307015	148	0.175676	0.797297	0.027027	0.220339	0.0338983	0.153846	0.213115	3.93333	0.0277778
FGFR1_ENST00000335922	365	0.169863	0.79726	0.0328767	0.213058	0.0412371	0.193548	0.20462	3.93243	0.0339943
KIAA0586	217	0.16129	0.797235	0.0414747	0.202312	0.0520231	0.257143	0.192308	3.93182	0.0432692
KIAA1731_ENST00000411936	217	0.110599	0.797235	0.0921659	0.138728	0.115607	0.833333	0.124352	3.93182	0.101523
PLA1A	143	0.181818	0.797203	0.020979	0.22807	0.0263158	0.115385	0.222222	3.93103	0.0214286
FCN3	69	0.202899	0.797101	0	0.254545	0	0	0.254545	3.92857	0
NR2C1_ENST00000330677	69	0.144928	0.797101	0.057971	0.181818	0.0727273	0.4	0.169492	3.92857	0.0615385
TMEM115	69	0.188406	0.797101	0.0144928	0.236364	0.0181818	0.0769231	0.232143	3.92857	0.0147059
VAX2	69	0.202899	0.797101	0	0.254545	0	0	0.254545	3.92857	0
HYDIN_ENST00000393550	207	0.169082	0.797101	0.0338164	0.212121	0.0424242	0.2	0.203488	3.92857	0.035
NCKAP1	207	0.169082	0.797101	0.0338164	0.212121	0.0424242	0.2	0.203488	3.92857	0.035
ZBTB5	133	0.150376	0.796992	0.0526316	0.188679	0.0660377	0.35	0.176991	3.92593	0.0555556
NTRK1_ENST00000392302	453	0.172185	0.796909	0.0309051	0.216066	0.0387812	0.179487	0.208	3.92391	0.0318907
ALDH3A2_ENST00000176643	64	0.125	0.796875	0.078125	0.156863	0.0980392	0.625	0.142857	3.92308	0.0847458
C18orf19	64	0.1875	0.796875	0.015625	0.235294	0.0196078	0.0833333	0.230769	3.92308	0.015873
CEPT1	64	0.1875	0.796875	0.015625	0.235294	0.0196078	0.0833333	0.230769	3.92308	0.015873
FLAD1_ENST00000405236	64	0.109375	0.796875	0.09375	0.137255	0.117647	0.857143	0.122807	3.92308	0.103448
GOLGA8A	64	0.1875	0.796875	0.015625	0.235294	0.0196078	0.0833333	0.230769	3.92308	0.015873
IKZF5	64	0.1875	0.796875	0.015625	0.235294	0.0196078	0.0833333	0.230769	3.92308	0.015873
LGALS8	64	0.1875	0.796875	0.015625	0.235294	0.0196078	0.0833333	0.230769	3.92308	0.015873
MTHFD2L_ENST00000395759	64	0.203125	0.796875	0	0.254902	0	0	0.254902	3.92308	0
RAET1G	64	0.15625	0.796875	0.046875	0.196078	0.0588235	0.3	0.185185	3.92308	0.0491803
SNX16	64	0.140625	0.796875	0.0625	0.176471	0.0784314	0.444444	0.163636	3.92308	0.0666667
SPTLC3_ENST00000450297	64	0.125	0.796875	0.078125	0.156863	0.0980392	0.625	0.142857	3.92308	0.0847458
ZDHHC6	64	0.109375	0.796875	0.09375	0.137255	0.117647	0.857143	0.122807	3.92308	0.103448
AKT2	192	0.1875	0.796875	0.015625	0.235294	0.0196078	0.0833333	0.230769	3.92308	0.015873
NLGN1_ENST00000401917	320	0.178125	0.796875	0.025	0.223529	0.0313725	0.140351	0.21673	3.92308	0.025641
SMAD3	315	0.107937	0.796825	0.0952381	0.135458	0.119522	0.882353	0.120996	3.92188	0.105263
PGAP1	182	0.181319	0.796703	0.021978	0.227586	0.0275862	0.121212	0.221477	3.91892	0.0224719
ZNF678_ENST00000397097	182	0.186813	0.796703	0.0164835	0.234483	0.0206897	0.0882353	0.22973	3.91892	0.0167598
CIC	777	0.129987	0.796654	0.0733591	0.163166	0.092084	0.564356	0.149408	3.91772	0.0791667
BCL2L11_ENST00000357757	59	0.118644	0.79661	0.0847458	0.148936	0.106383	0.714286	0.134615	3.91667	0.0925926
C4orf49	59	0.186441	0.79661	0.0169492	0.234043	0.0212766	0.0909091	0.229167	3.91667	0.0172414
PRG2_ENST00000311862	59	0.186441	0.79661	0.0169492	0.234043	0.0212766	0.0909091	0.229167	3.91667	0.0172414
SC4MOL	59	0.135593	0.79661	0.0677966	0.170213	0.0851064	0.5	0.156863	3.91667	0.0727273
TRUB1	59	0.152542	0.79661	0.0508475	0.191489	0.0638298	0.333333	0.18	3.91667	0.0535714
ZC4H2_ENST00000447788	59	0.186441	0.79661	0.0169492	0.234043	0.0212766	0.0909091	0.229167	3.91667	0.0172414
CHM	118	0.169492	0.79661	0.0338983	0.212766	0.0425532	0.2	0.204082	3.91667	0.0350877
GNE_ENST00000339267	118	0.177966	0.79661	0.0254237	0.223404	0.0319149	0.142857	0.216495	3.91667	0.026087
TBK1_ENST00000331710	118	0.135593	0.79661	0.0677966	0.170213	0.0851064	0.5	0.156863	3.91667	0.0727273
WEE1	118	0.152542	0.79661	0.0508475	0.191489	0.0638298	0.333333	0.18	3.91667	0.0535714
TGFBR1	290	0.062069	0.796552	0.141379	0.0779221	0.177489	2.27778	0.0661765	3.91525	0.164659
MDC1	580	0.137931	0.796552	0.0655172	0.17316	0.0822511	0.475	0.16	3.91525	0.0701107
PTPRS_ENST00000372412	801	0.173533	0.796504	0.0299625	0.217868	0.0376176	0.172662	0.20997	3.91411	0.030888
C5orf42_ENST00000425232	565	0.162832	0.79646	0.040708	0.204444	0.0511111	0.25	0.194503	3.91304	0.0424354
RUNDC3B	167	0.161677	0.796407	0.0419162	0.203008	0.0526316	0.259259	0.192857	3.91176	0.04375
PDE1A_ENST00000456212	221	0.140271	0.79638	0.0633484	0.176136	0.0795455	0.451613	0.163158	3.91111	0.0676329
SGIP1	275	0.163636	0.796364	0.04	0.205479	0.0502283	0.244444	0.195652	3.91071	0.0416667
ACAD8_ENST00000543332	54	0.185185	0.796296	0.0185185	0.232558	0.0232558	0.1	0.227273	3.90909	0.0188679
C1orf61	54	0.203704	0.796296	0	0.255814	0	0	0.255814	3.90909	0
CNPY3	54	0.185185	0.796296	0.0185185	0.232558	0.0232558	0.1	0.227273	3.90909	0.0188679
CYB5R3_ENST00000361740	54	0.185185	0.796296	0.0185185	0.232558	0.0232558	0.1	0.227273	3.90909	0.0188679
FHL1_ENST00000370683	54	0.185185	0.796296	0.0185185	0.232558	0.0232558	0.1	0.227273	3.90909	0.0188679
LOC51321	54	0.148148	0.796296	0.0555556	0.186047	0.0697674	0.375	0.173913	3.90909	0.0588235
NHEJ1_ENST00000409720	54	0.166667	0.796296	0.037037	0.209302	0.0465116	0.222222	0.2	3.90909	0.0384615
RNF134	54	0.166667	0.796296	0.037037	0.209302	0.0465116	0.222222	0.2	3.90909	0.0384615
TBRG1_ENST00000441174	54	0.12963	0.796296	0.0740741	0.162791	0.0930233	0.571429	0.148936	3.90909	0.08
TLCD1	54	0.203704	0.796296	0	0.255814	0	0	0.255814	3.90909	0
TMEM183A	54	0.166667	0.796296	0.037037	0.209302	0.0465116	0.222222	0.2	3.90909	0.0384615
TSFM_ENST00000323833	54	0.203704	0.796296	0	0.255814	0	0	0.255814	3.90909	0
MYOT	108	0.157407	0.796296	0.0462963	0.197674	0.0581395	0.294118	0.186813	3.90909	0.0485437
AGBL5	216	0.157407	0.796296	0.0462963	0.197674	0.0581395	0.294118	0.186813	3.90909	0.0485437
C6orf146	103	0.15534	0.796117	0.0485437	0.195122	0.0609756	0.3125	0.183908	3.90476	0.0510204
ZMYM5_ENST00000337963	103	0.145631	0.796117	0.0582524	0.182927	0.0731707	0.4	0.170455	3.90476	0.0618557
DDX23	206	0.179612	0.796117	0.0242718	0.22561	0.0304878	0.135135	0.218935	3.90476	0.0248756
CCND1_ENST00000227507	152	0.138158	0.796053	0.0657895	0.173554	0.0826446	0.47619	0.160305	3.90323	0.0704225
CSDE1	201	0.149254	0.79602	0.0547264	0.1875	0.06875	0.366667	0.175439	3.90244	0.0578947
TCF3	201	0.169154	0.79602	0.0348259	0.2125	0.04375	0.205882	0.203593	3.90244	0.0360825
HGF	598	0.118729	0.795987	0.0852843	0.14916	0.107143	0.71831	0.134725	3.90164	0.0932358
HNF1A	397	0.13602	0.79597	0.0680101	0.170886	0.085443	0.5	0.157434	3.90123	0.072973
HACL1	98	0.173469	0.795918	0.0306122	0.217949	0.0384615	0.176471	0.209877	3.9	0.0315789
MKKS	98	0.193878	0.795918	0.0102041	0.24359	0.0128205	0.0526316	0.240506	3.9	0.0103093
PIK3CD_ENST00000536656	343	0.163265	0.795918	0.0408163	0.205128	0.0512821	0.25	0.195122	3.9	0.0425532
VPS13A_ENST00000357409	534	0.151685	0.79588	0.0524345	0.190588	0.0658824	0.345679	0.178808	3.89908	0.055336
FAM178A_ENST00000370269	191	0.183246	0.795812	0.0209424	0.230263	0.0263158	0.114286	0.224359	3.89744	0.0213904
GIMAP7	142	0.176056	0.795775	0.028169	0.221239	0.0353982	0.16	0.213675	3.89655	0.0289855
NCOA1_ENST00000405141	284	0.169014	0.795775	0.0352113	0.212389	0.0442478	0.208333	0.20339	3.89655	0.0364964
FAM65B_ENST00000510784	93	0.193548	0.795699	0.0107527	0.243243	0.0135135	0.0555556	0.24	3.89474	0.0108696
CUL2	137	0.131387	0.79562	0.0729927	0.165138	0.0917431	0.555556	0.151261	3.89286	0.0787402
FCRL5_ENST00000368190	181	0.171271	0.79558	0.0331492	0.215278	0.0416667	0.193548	0.206667	3.89189	0.0342857
BCL3	88	0.181818	0.795455	0.0227273	0.228571	0.0285714	0.125	0.222222	3.88889	0.0232558
HTR2B	88	0.147727	0.795455	0.0568182	0.185714	0.0714286	0.384615	0.173333	3.88889	0.060241
HYAL1	88	0.170455	0.795455	0.0340909	0.214286	0.0428571	0.2	0.205479	3.88889	0.0352941
MYOZ2	88	0.170455	0.795455	0.0340909	0.214286	0.0428571	0.2	0.205479	3.88889	0.0352941
TTLL4	220	0.168182	0.795455	0.0363636	0.211429	0.0457143	0.216216	0.202186	3.88889	0.0377358
CBL	396	0.133838	0.795455	0.0707071	0.168254	0.0888889	0.528302	0.154519	3.88889	0.076087
VPS13A_ENST00000376634	557	0.154399	0.795332	0.0502693	0.194131	0.0632054	0.325581	0.18259	3.88596	0.0529301
CSRNP2	127	0.165354	0.795276	0.0393701	0.207921	0.049505	0.238095	0.198113	3.88462	0.0409836
HSPA4	127	0.181102	0.795276	0.023622	0.227723	0.029703	0.130435	0.221154	3.88462	0.0241935
TMPO	83	0.144578	0.795181	0.060241	0.181818	0.0757576	0.416667	0.169014	3.88235	0.0641026
ACE_ENST00000428043	166	0.192771	0.795181	0.0120482	0.242424	0.0151515	0.0625	0.238806	3.88235	0.0121951
GART	166	0.192771	0.795181	0.0120482	0.242424	0.0151515	0.0625	0.238806	3.88235	0.0121951
FAM190B	122	0.139344	0.795082	0.0655738	0.175258	0.0824742	0.470588	0.161905	3.88	0.0701754
SOAT1	122	0.188525	0.795082	0.0163934	0.237113	0.0206186	0.0869565	0.232323	3.88	0.0166667
SPOPL	122	0.139344	0.795082	0.0655738	0.175258	0.0824742	0.470588	0.161905	3.88	0.0701754
SSX2IP	122	0.163934	0.795082	0.0409836	0.206186	0.0515464	0.25	0.196078	3.88	0.042735
GLI1	488	0.14959	0.795082	0.0553279	0.188144	0.0695876	0.369863	0.175904	3.88	0.0585683
ABCD2	239	0.158996	0.794979	0.0460251	0.2	0.0578947	0.289474	0.189055	3.87755	0.0482456
COPS3	78	0.141026	0.794872	0.0641026	0.177419	0.0806452	0.454545	0.164179	3.875	0.0684932
CREB3L4	78	0.192308	0.794872	0.0128205	0.241935	0.016129	0.0666667	0.238095	3.875	0.012987
UBXN2B	78	0.115385	0.794872	0.0897436	0.145161	0.112903	0.777778	0.130435	3.875	0.0985915
GAS2	117	0.17094	0.794872	0.034188	0.215054	0.0430108	0.2	0.206186	3.875	0.0353982
NLN	117	0.188034	0.794872	0.017094	0.236559	0.0215054	0.0909091	0.231579	3.875	0.0173913
TBX15_ENST00000449873	117	0.17094	0.794872	0.034188	0.215054	0.0430108	0.2	0.206186	3.875	0.0353982
C20orf12	156	0.166667	0.794872	0.0384615	0.209677	0.0483871	0.230769	0.2	3.875	0.04
CYLC1_ENST00000329312	273	0.142857	0.794872	0.0622711	0.179724	0.078341	0.435897	0.166667	3.875	0.0664062
GNA13	151	0.125828	0.794702	0.0794702	0.158333	0.1	0.631579	0.143939	3.87097	0.0863309
AGAP5	112	0.169643	0.794643	0.0357143	0.213483	0.0449438	0.210526	0.204301	3.86957	0.037037
DLAT	112	0.178571	0.794643	0.0267857	0.224719	0.0337079	0.15	0.217391	3.86957	0.0275229
DNAJC21	112	0.142857	0.794643	0.0625	0.179775	0.0786517	0.4375	0.166667	3.86957	0.0666667
KHDRBS1	112	0.160714	0.794643	0.0446429	0.202247	0.0561798	0.277778	0.191489	3.86957	0.046729
NPLOC4_ENST00000374747	112	0.205357	0.794643	0	0.258427	0	0	0.258427	3.86957	0
UNKL_ENST00000389221	112	0.178571	0.794643	0.0267857	0.224719	0.0337079	0.15	0.217391	3.86957	0.0275229
CSDE1_ENST00000369530	185	0.162162	0.794595	0.0432432	0.204082	0.0544218	0.266667	0.193548	3.86842	0.0451977
GAD1	185	0.183784	0.794595	0.0216216	0.231293	0.0272109	0.117647	0.225166	3.86842	0.0220994
NUP98_ENST00000397007	185	0.167568	0.794595	0.0378378	0.210884	0.047619	0.225806	0.201299	3.86842	0.0393258
COPS4	73	0.150685	0.794521	0.0547945	0.189655	0.0689655	0.363636	0.177419	3.86667	0.057971
GSPT1	73	0.191781	0.794521	0.0136986	0.241379	0.0172414	0.0714286	0.237288	3.86667	0.0138889
MSRB3_ENST00000355192	73	0.164384	0.794521	0.0410959	0.206897	0.0517241	0.25	0.196721	3.86667	0.0428571
POLD2	73	0.178082	0.794521	0.0273973	0.224138	0.0344828	0.153846	0.216667	3.86667	0.028169
TST	73	0.178082	0.794521	0.0273973	0.224138	0.0344828	0.153846	0.216667	3.86667	0.028169
C3orf67	146	0.157534	0.794521	0.0479452	0.198276	0.0603448	0.304348	0.186992	3.86667	0.0503597
RTF1_ENST00000389629	146	0.143836	0.794521	0.0616438	0.181034	0.0775862	0.428571	0.168	3.86667	0.0656934
C3orf77_ENST00000309765	292	0.178082	0.794521	0.0273973	0.224138	0.0344828	0.153846	0.216667	3.86667	0.028169
PTPRS	837	0.178017	0.794504	0.0274791	0.22406	0.0345865	0.154362	0.21657	3.86628	0.0282555
CCDC15	180	0.166667	0.794444	0.0388889	0.20979	0.048951	0.233333	0.2	3.86486	0.0404624
EPB41_ENST00000343067	180	0.172222	0.794444	0.0333333	0.216783	0.041958	0.193548	0.208054	3.86486	0.0344828
SLC1A3	180	0.161111	0.794444	0.0444444	0.202797	0.0559441	0.275862	0.192053	3.86486	0.0465116
CCSER2	107	0.140187	0.794393	0.0654206	0.176471	0.0823529	0.466667	0.163043	3.86364	0.07
KIAA1279	107	0.196262	0.794393	0.00934579	0.247059	0.0117647	0.047619	0.244186	3.86364	0.00943396
MCF2L_ENST00000535094	107	0.205607	0.794393	0	0.258824	0	0	0.258824	3.86364	0
RAD51C_ENST00000337432	107	0.130841	0.794393	0.0747664	0.164706	0.0941176	0.571429	0.150538	3.86364	0.0808081
SNX9	107	0.196262	0.794393	0.00934579	0.247059	0.0117647	0.047619	0.244186	3.86364	0.00943396
C10orf6	214	0.182243	0.794393	0.0233645	0.229412	0.0294118	0.128205	0.222857	3.86364	0.0239234
TRIM24	248	0.16129	0.794355	0.0443548	0.203046	0.0558376	0.275	0.192308	3.86275	0.0464135
C6orf165	141	0.156028	0.794326	0.0496454	0.196429	0.0625	0.318182	0.184874	3.86207	0.0522388
KLC4	141	0.12766	0.794326	0.0780142	0.160714	0.0982143	0.611111	0.146341	3.86207	0.0846154
ELF3_ENST00000359651	175	0.148571	0.794286	0.0571429	0.18705	0.0719424	0.384615	0.174497	3.86111	0.0606061
Q7Z2S2_HUMAN	379	0.174142	0.794195	0.0316623	0.219269	0.0398671	0.181818	0.210863	3.85897	0.0326975
FAM118B	68	0.161765	0.794118	0.0441176	0.203704	0.0555556	0.272727	0.192982	3.85714	0.0461538
HDHD3	68	0.176471	0.794118	0.0294118	0.222222	0.037037	0.166667	0.214286	3.85714	0.030303
IFT81	68	0.147059	0.794118	0.0588235	0.185185	0.0740741	0.4	0.172414	3.85714	0.0625
NPIPL2	68	0.191176	0.794118	0.0147059	0.240741	0.0185185	0.0769231	0.236364	3.85714	0.0149254
MAP2K7_ENST00000397983	102	0.147059	0.794118	0.0588235	0.185185	0.0740741	0.4	0.172414	3.85714	0.0625
SNW1	102	0.176471	0.794118	0.0294118	0.222222	0.037037	0.166667	0.214286	3.85714	0.030303
TUBD1	102	0.117647	0.794118	0.0882353	0.148148	0.111111	0.75	0.133333	3.85714	0.0967742
EPS8	170	0.152941	0.794118	0.0529412	0.192593	0.0666667	0.346154	0.180556	3.85714	0.0559006
PPP6C	170	0.0823529	0.794118	0.123529	0.103704	0.155556	1.5	0.0897436	3.85714	0.14094
ZC3H12B	170	0.158824	0.794118	0.0470588	0.2	0.0592593	0.296296	0.188811	3.85714	0.0493827
ZNF678	170	0.176471	0.794118	0.0294118	0.222222	0.037037	0.166667	0.214286	3.85714	0.030303
DIAPH1	204	0.176471	0.794118	0.0294118	0.222222	0.037037	0.166667	0.214286	3.85714	0.030303
PDE8B	238	0.168067	0.794118	0.0378151	0.21164	0.047619	0.225	0.20202	3.85714	0.0393013
SLC4A10_ENST00000375514	369	0.176152	0.794038	0.0298103	0.221843	0.0375427	0.169231	0.213816	3.85526	0.0307263
KIAA1033	199	0.145729	0.79397	0.0603015	0.183544	0.0759494	0.413793	0.170588	3.85366	0.0641711
FHAD1_ENST00000358897	165	0.181818	0.793939	0.0242424	0.229008	0.0305344	0.133333	0.222222	3.85294	0.0248447
DENND4A_ENST00000443035	296	0.148649	0.793919	0.0574324	0.187234	0.0723404	0.386364	0.174603	3.85246	0.0609319
ENPP5	131	0.152672	0.793893	0.0534351	0.192308	0.0673077	0.35	0.18018	3.85185	0.0564516
RAI14_ENST00000515799	131	0.160305	0.793893	0.0458015	0.201923	0.0576923	0.285714	0.190909	3.85185	0.048
TMCC1_ENST00000393238	131	0.167939	0.793893	0.0381679	0.211538	0.0480769	0.227273	0.201835	3.85185	0.0396825
SPOCK3_ENST00000357154	228	0.153509	0.79386	0.0526316	0.19337	0.0662983	0.342857	0.181347	3.85106	0.0555556
AKR1C4	97	0.154639	0.793814	0.0515464	0.194805	0.0649351	0.333333	0.182927	3.85	0.0543478
C12orf41	97	0.164948	0.793814	0.0412371	0.207792	0.0519481	0.25	0.197531	3.85	0.0430108
GZMA	97	0.164948	0.793814	0.0412371	0.207792	0.0519481	0.25	0.197531	3.85	0.0430108
KBTBD10	97	0.195876	0.793814	0.0103093	0.246753	0.012987	0.0526316	0.24359	3.85	0.0104167
SMARCE1_ENST00000348513	97	0.123711	0.793814	0.0824742	0.155844	0.103896	0.666667	0.141176	3.85	0.0898876
SCEL	194	0.159794	0.793814	0.0463918	0.201299	0.0584416	0.290323	0.190184	3.85	0.0486486
KIAA1468	223	0.170404	0.793722	0.0358744	0.214689	0.0451977	0.210526	0.205405	3.84783	0.0372093
CSNK2A2_ENST00000262506	63	0.0952381	0.793651	0.111111	0.12	0.14	1.16667	0.105263	3.84615	0.125
ITGB1BP2	63	0.190476	0.793651	0.015873	0.24	0.02	0.0833333	0.235294	3.84615	0.016129
OXNAD1	63	0.206349	0.793651	0	0.26	0	0	0.26	3.84615	0
PDE4D	126	0.15873	0.793651	0.047619	0.2	0.06	0.3	0.188679	3.84615	0.05
SPOCK3_ENST00000421836	189	0.15873	0.793651	0.047619	0.2	0.06	0.3	0.188679	3.84615	0.05
EYS	339	0.147493	0.79351	0.0589971	0.185874	0.0743494	0.4	0.17301	3.84286	0.0626959
AVL9	92	0.173913	0.793478	0.0326087	0.219178	0.0410959	0.1875	0.210526	3.84211	0.0337079
GAP43_ENST00000393780	92	0.119565	0.793478	0.0869565	0.150685	0.109589	0.727273	0.135802	3.84211	0.0952381
NSRP1	92	0.195652	0.793478	0.0108696	0.246575	0.0136986	0.0555556	0.243243	3.84211	0.010989
TROVE2_ENST00000367446	92	0.184783	0.793478	0.0217391	0.232877	0.0273973	0.117647	0.226667	3.84211	0.0222222
CRTC3	121	0.198347	0.793388	0.00826446	0.25	0.0104167	0.0416667	0.247423	3.84	0.00833333
MUM1	121	0.198347	0.793388	0.00826446	0.25	0.0104167	0.0416667	0.247423	3.84	0.00833333
PJA2	121	0.165289	0.793388	0.0413223	0.208333	0.0520833	0.25	0.19802	3.84	0.0431034
SGIP1_ENST00000237247	242	0.169421	0.793388	0.0371901	0.213542	0.046875	0.219512	0.20398	3.84	0.0386266
CARNS1_ENST00000445895	150	0.18	0.793333	0.0266667	0.226891	0.0336134	0.148148	0.219512	3.83871	0.0273973
MCM8_ENST00000378896	150	0.146667	0.793333	0.06	0.184874	0.0756303	0.409091	0.171875	3.83871	0.0638298
C14orf135_ENST00000406854	179	0.139665	0.793296	0.0670391	0.176056	0.084507	0.48	0.162338	3.83784	0.0718563
ELF3	179	0.145251	0.793296	0.0614525	0.183099	0.0774648	0.423077	0.169935	3.83784	0.0654762
DEK	58	0.206897	0.793103	0	0.26087	0	0	0.26087	3.83333	0
RHEB	58	0.0689655	0.793103	0.137931	0.0869565	0.173913	2	0.0740741	3.83333	0.16
RNF220_ENST00000443020	58	0.155172	0.793103	0.0517241	0.195652	0.0652174	0.333333	0.183673	3.83333	0.0545455
VPS37C	58	0.172414	0.793103	0.0344828	0.217391	0.0434783	0.2	0.208333	3.83333	0.0357143
WFDC3	58	0.155172	0.793103	0.0517241	0.195652	0.0652174	0.333333	0.183673	3.83333	0.0545455
DEPDC7	87	0.172414	0.793103	0.0344828	0.217391	0.0434783	0.2	0.208333	3.83333	0.0357143
EIF2B4	87	0.16092	0.793103	0.045977	0.202899	0.057971	0.285714	0.191781	3.83333	0.0481928
GRAMD3	87	0.149425	0.793103	0.0574713	0.188406	0.0724638	0.384615	0.175676	3.83333	0.0609756
GSS	87	0.195402	0.793103	0.0114943	0.246377	0.0144928	0.0588235	0.242857	3.83333	0.0116279
POFUT1	87	0.183908	0.793103	0.0229885	0.231884	0.0289855	0.125	0.225352	3.83333	0.0235294
PPP2R2D_ENST00000455566	87	0.149425	0.793103	0.0574713	0.188406	0.0724638	0.384615	0.175676	3.83333	0.0609756
SERBP1	87	0.16092	0.793103	0.045977	0.202899	0.057971	0.285714	0.191781	3.83333	0.0481928
TUBA1A_ENST00000301071	87	0.16092	0.793103	0.045977	0.202899	0.057971	0.285714	0.191781	3.83333	0.0481928
BRSK2_ENST00000528841	116	0.206897	0.793103	0	0.26087	0	0	0.26087	3.83333	0
DARS2	116	0.172414	0.793103	0.0344828	0.217391	0.0434783	0.2	0.208333	3.83333	0.0357143
WAPAL_ENST00000342368	116	0.163793	0.793103	0.0431034	0.206522	0.0543478	0.263158	0.195876	3.83333	0.045045
PHACTR2_ENST00000440869	145	0.172414	0.793103	0.0344828	0.217391	0.0434783	0.2	0.208333	3.83333	0.0357143
ZNF645	145	0.151724	0.793103	0.0551724	0.191304	0.0695652	0.363636	0.178862	3.83333	0.0583942
ADGB	377	0.135279	0.793103	0.071618	0.170569	0.090301	0.529412	0.156442	3.83333	0.0771429
BRCA2	1125	0.106667	0.792889	0.100444	0.134529	0.126682	0.941667	0.119403	3.82833	0.11166
DGCR2	140	0.171429	0.792857	0.0357143	0.216216	0.045045	0.208333	0.206897	3.82759	0.037037
GC	140	0.15	0.792857	0.0571429	0.189189	0.0720721	0.380952	0.176471	3.82759	0.0606061
MYST1	140	0.178571	0.792857	0.0285714	0.225225	0.036036	0.16	0.217391	3.82759	0.0294118
PAM_ENST00000304400	251	0.151394	0.792829	0.0557769	0.190955	0.0703518	0.368421	0.178404	3.82692	0.0590717
EPHB1_ENST00000398015	695	0.178417	0.792806	0.028777	0.225045	0.0362976	0.16129	0.217163	3.82639	0.0296296
ANKRD36C	111	0.171171	0.792793	0.036036	0.215909	0.0454545	0.210526	0.206522	3.82609	0.0373832
ANKRD36C_ENST00000420871	111	0.171171	0.792793	0.036036	0.215909	0.0454545	0.210526	0.206522	3.82609	0.0373832
CKMT2	111	0.171171	0.792793	0.036036	0.215909	0.0454545	0.210526	0.206522	3.82609	0.0373832
OSBPL9_ENST00000371710	111	0.18018	0.792793	0.027027	0.227273	0.0340909	0.15	0.21978	3.82609	0.0277778
PARM1_ENST00000307428	111	0.189189	0.792793	0.018018	0.238636	0.0227273	0.0952381	0.233333	3.82609	0.0183486
ZNF624	193	0.19171	0.792746	0.015544	0.24183	0.0196078	0.0810811	0.237179	3.825	0.0157895
ACAA1	82	0.170732	0.792683	0.0365854	0.215385	0.0461538	0.214286	0.205882	3.82353	0.0379747
ACTR6	82	0.158537	0.792683	0.0487805	0.2	0.0615385	0.307692	0.188406	3.82353	0.0512821
ART1	82	0.182927	0.792683	0.0243902	0.230769	0.0307692	0.133333	0.223881	3.82353	0.025
ASAH2	82	0.170732	0.792683	0.0365854	0.215385	0.0461538	0.214286	0.205882	3.82353	0.0379747
IL4R_ENST00000380922	82	0.182927	0.792683	0.0243902	0.230769	0.0307692	0.133333	0.223881	3.82353	0.025
SLC15A5	82	0.170732	0.792683	0.0365854	0.215385	0.0461538	0.214286	0.205882	3.82353	0.0379747
TRIM64C	82	0.182927	0.792683	0.0243902	0.230769	0.0307692	0.133333	0.223881	3.82353	0.025
XRCC2	82	0.182927	0.792683	0.0243902	0.230769	0.0307692	0.133333	0.223881	3.82353	0.025
NKX2-1_ENST00000354822	164	0.176829	0.792683	0.0304878	0.223077	0.0384615	0.172414	0.214815	3.82353	0.0314465
ANKAR_ENST00000520309	246	0.162602	0.792683	0.0447154	0.205128	0.0564103	0.275	0.194175	3.82353	0.0468085
FAM83D	135	0.162963	0.792593	0.0444444	0.205607	0.0560748	0.272727	0.19469	3.82143	0.0465116
SPEF2_ENST00000303129	135	0.162963	0.792593	0.0444444	0.205607	0.0560748	0.272727	0.19469	3.82143	0.0465116
ITGA2	241	0.174274	0.792531	0.033195	0.219895	0.0418848	0.190476	0.211055	3.82	0.0343348
C15orf55_ENST00000333756	294	0.170068	0.792517	0.037415	0.214592	0.0472103	0.22	0.204918	3.81967	0.0388693
C3orf54	53	0.169811	0.792453	0.0377358	0.214286	0.047619	0.222222	0.204545	3.81818	0.0392157
CCDC144NL	53	0.207547	0.792453	0	0.261905	0	0	0.261905	3.81818	0
CEP57_ENST00000541150	53	0.113208	0.792453	0.0943396	0.142857	0.119048	0.833333	0.12766	3.81818	0.104167
CUTC	53	0.132075	0.792453	0.0754717	0.166667	0.0952381	0.571429	0.152174	3.81818	0.0816327
DOK3_ENST00000312943	53	0.169811	0.792453	0.0377358	0.214286	0.047619	0.222222	0.204545	3.81818	0.0392157
LMO2	53	0.169811	0.792453	0.0377358	0.214286	0.047619	0.222222	0.204545	3.81818	0.0392157
TDP2_ENST00000341060	53	0.169811	0.792453	0.0377358	0.214286	0.047619	0.222222	0.204545	3.81818	0.0392157
TMBIM4	53	0.169811	0.792453	0.0377358	0.214286	0.047619	0.222222	0.204545	3.81818	0.0392157
VMO1	53	0.207547	0.792453	0	0.261905	0	0	0.261905	3.81818	0
WDR54	53	0.169811	0.792453	0.0377358	0.214286	0.047619	0.222222	0.204545	3.81818	0.0392157
ATP6V1H	106	0.169811	0.792453	0.0377358	0.214286	0.047619	0.222222	0.204545	3.81818	0.0392157
ENSG00000132356	106	0.141509	0.792453	0.0660377	0.178571	0.0833333	0.466667	0.164835	3.81818	0.0707071
ETAA1	159	0.188679	0.792453	0.0188679	0.238095	0.0238095	0.1	0.232558	3.81818	0.0192308
SGOL2	212	0.179245	0.792453	0.0283019	0.22619	0.0357143	0.157895	0.218391	3.81818	0.0291262
JAK3	530	0.150943	0.792453	0.0566038	0.190476	0.0714286	0.375	0.177778	3.81818	0.06
STAT3	395	0.156962	0.792405	0.0506329	0.198083	0.0638978	0.322581	0.186186	3.81707	0.0533333
SMARCA4	1127	0.113576	0.792369	0.094055	0.143337	0.118701	0.828125	0.128128	3.81624	0.10382
TMCC1	130	0.169231	0.792308	0.0384615	0.213592	0.0485437	0.227273	0.203704	3.81481	0.04
FGD6	284	0.158451	0.792254	0.0492958	0.2	0.0622222	0.311111	0.188285	3.81356	0.0518519
FAM63A_ENST00000361738	77	0.181818	0.792208	0.025974	0.229508	0.0327869	0.142857	0.222222	3.8125	0.0266667
GMNC	77	0.181818	0.792208	0.025974	0.229508	0.0327869	0.142857	0.222222	3.8125	0.0266667
LEF1_ENST00000510624	77	0.116883	0.792208	0.0909091	0.147541	0.114754	0.777778	0.132353	3.8125	0.1
TIGD2	77	0.12987	0.792208	0.0779221	0.163934	0.0983607	0.6	0.149254	3.8125	0.084507
USP17L24	77	0.207792	0.792208	0	0.262295	0	0	0.262295	3.8125	0
EPS15	154	0.149351	0.792208	0.0584416	0.188525	0.0737705	0.391304	0.175573	3.8125	0.062069
RHAG	178	0.168539	0.792135	0.0393258	0.212766	0.0496454	0.233333	0.202703	3.81081	0.0409357
PSKH1	101	0.178218	0.792079	0.029703	0.225	0.0375	0.166667	0.216867	3.80952	0.0306122
SPATA22	101	0.168317	0.792079	0.039604	0.2125	0.05	0.235294	0.202381	3.80952	0.0412371
SIX1	125	0.176	0.792	0.032	0.222222	0.040404	0.181818	0.213592	3.80769	0.0330579
ZBTB1_ENST00000394712	125	0.152	0.792	0.056	0.191919	0.0707071	0.368421	0.179245	3.80769	0.059322
KIAA1524	149	0.161074	0.791946	0.0469799	0.20339	0.059322	0.291667	0.192	3.80645	0.0492958
DCLRE1A	173	0.17341	0.791908	0.0346821	0.218978	0.0437956	0.2	0.20979	3.80556	0.0359281
MPL_ENST00000413998	197	0.162437	0.791878	0.0456853	0.205128	0.0576923	0.28125	0.193939	3.80488	0.0478723
RPS6KA4	269	0.178439	0.791822	0.0297398	0.225352	0.0375587	0.166667	0.217195	3.80357	0.0306513
GIMAP4_ENST00000479232	72	0.208333	0.791667	0	0.263158	0	0	0.263158	3.8	0
POLD2_ENST00000406581	72	0.180556	0.791667	0.0277778	0.22807	0.0350877	0.153846	0.220339	3.8	0.0285714
TCEA2	72	0.194444	0.791667	0.0138889	0.245614	0.0175439	0.0714286	0.241379	3.8	0.0140845
C12orf41_ENST00000420613	96	0.166667	0.791667	0.0416667	0.210526	0.0526316	0.25	0.2	3.8	0.0434783
SNX7_ENST00000306121	96	0.177083	0.791667	0.03125	0.223684	0.0394737	0.176471	0.21519	3.8	0.0322581
ATMIN	120	0.175	0.791667	0.0333333	0.221053	0.0421053	0.190476	0.212121	3.8	0.0344828
OR2B2	120	0.175	0.791667	0.0333333	0.221053	0.0421053	0.190476	0.212121	3.8	0.0344828
PLCZ1	240	0.15	0.791667	0.0583333	0.189474	0.0736842	0.388889	0.176471	3.8	0.0619469
RFWD2	240	0.133333	0.791667	0.075	0.168421	0.0947368	0.5625	0.153846	3.8	0.0810811
EPHB1	710	0.177465	0.791549	0.0309859	0.224199	0.0391459	0.174603	0.215753	3.7973	0.0319767
MRE11A	235	0.131915	0.791489	0.0765957	0.166667	0.0967742	0.580645	0.151961	3.79592	0.0829493
ARHGAP9	187	0.165775	0.791444	0.0427807	0.209459	0.0540541	0.258065	0.198718	3.79487	0.0446927
GMPS	163	0.171779	0.791411	0.0368098	0.217054	0.0465116	0.214286	0.207407	3.79412	0.0382166
RGPD4	302	0.15894	0.791391	0.0496689	0.200837	0.0627615	0.3125	0.188976	3.79365	0.0522648
ENOX2	139	0.18705	0.791367	0.0215827	0.236364	0.0272727	0.115385	0.230088	3.7931	0.0220588
VSIG4	115	0.2	0.791304	0.00869565	0.252747	0.010989	0.0434783	0.25	3.79167	0.00877193
TET1_ENST00000373644	805	0.149068	0.791304	0.0596273	0.188383	0.0753532	0.4	0.175182	3.79167	0.0634082
SLC9A11	388	0.154639	0.791237	0.0541237	0.19544	0.0684039	0.35	0.182927	3.79012	0.0572207
DNAJC3	91	0.131868	0.791209	0.0769231	0.166667	0.0972222	0.583333	0.151899	3.78947	0.0833333
PBX1_ENST00000540236	91	0.186813	0.791209	0.021978	0.236111	0.0277778	0.117647	0.22973	3.78947	0.0224719
PPM1B_ENST00000282412	91	0.142857	0.791209	0.0659341	0.180556	0.0833333	0.461538	0.166667	3.78947	0.0705882
RABGAP1L_ENST00000357444	91	0.153846	0.791209	0.0549451	0.194444	0.0694444	0.357143	0.181818	3.78947	0.0581395
TERF1	91	0.164835	0.791209	0.043956	0.208333	0.0555556	0.266667	0.197368	3.78947	0.045977
VWDE_ENST00000275358	364	0.151099	0.791209	0.0576923	0.190972	0.0729167	0.381818	0.177994	3.78947	0.0612245
C18orf63	67	0.149254	0.791045	0.0597015	0.188679	0.0754717	0.4	0.175439	3.78571	0.0634921
C1orf218	67	0.19403	0.791045	0.0149254	0.245283	0.0188679	0.0769231	0.240741	3.78571	0.0151515
ENO4	67	0.149254	0.791045	0.0597015	0.188679	0.0754717	0.4	0.175439	3.78571	0.0634921
HSP90AA1_ENST00000441629	67	0.134328	0.791045	0.0746269	0.169811	0.0943396	0.555556	0.155172	3.78571	0.0806452
JKAMP_ENST00000356057	67	0.119403	0.791045	0.0895522	0.150943	0.113208	0.75	0.135593	3.78571	0.0983607
NTPCR	67	0.19403	0.791045	0.0149254	0.245283	0.0188679	0.0769231	0.240741	3.78571	0.0151515
SPRY1	67	0.149254	0.791045	0.0597015	0.188679	0.0754717	0.4	0.175439	3.78571	0.0634921
CUL3	287	0.111498	0.790941	0.097561	0.140969	0.123348	0.875	0.12549	3.78333	0.108108
C6orf10	110	0.163636	0.790909	0.0454545	0.206897	0.0574713	0.277778	0.195652	3.78261	0.047619
VEGFA	110	0.127273	0.790909	0.0818182	0.16092	0.103448	0.642857	0.145833	3.78261	0.0891089
ZNF799_ENST00000430385	153	0.176471	0.79085	0.0326797	0.22314	0.0413223	0.185185	0.214286	3.78125	0.0337838
SMC2L1	196	0.19898	0.790816	0.0102041	0.251613	0.0129032	0.0512821	0.248408	3.78049	0.0103093
INPP4B_ENST00000513000	368	0.13587	0.790761	0.0733696	0.171821	0.0927835	0.54	0.157233	3.77922	0.0791789
FLJ42177	86	0.174419	0.790698	0.0348837	0.220588	0.0441176	0.2	0.211268	3.77778	0.0361446
RQCD1	86	0.186047	0.790698	0.0232558	0.235294	0.0294118	0.125	0.228571	3.77778	0.0238095
SRPK1_ENST00000373822	86	0.139535	0.790698	0.0697674	0.176471	0.0882353	0.5	0.162162	3.77778	0.075
BMPR1B_ENST00000515059	129	0.162791	0.790698	0.0465116	0.205882	0.0588235	0.285714	0.194444	3.77778	0.0487805
MAPK6	129	0.147287	0.790698	0.0620155	0.186275	0.0784314	0.421053	0.172727	3.77778	0.0661157
PIK3CD	387	0.173127	0.790698	0.0361757	0.218954	0.0457516	0.208955	0.209375	3.77778	0.0375335
LIPI	191	0.146597	0.790576	0.0628272	0.18543	0.0794702	0.428571	0.171779	3.775	0.0670391
C5orf42	463	0.170626	0.790497	0.0388769	0.215847	0.0491803	0.227848	0.205729	3.7732	0.0404494
FBXL17_ENST00000542267	105	0.161905	0.790476	0.047619	0.204819	0.060241	0.294118	0.193182	3.77273	0.05
FBXW11_ENST00000296933	105	0.142857	0.790476	0.0666667	0.180723	0.0843373	0.466667	0.166667	3.77273	0.0714286
PWWP2B_ENST00000368609	105	0.2	0.790476	0.00952381	0.253012	0.0120482	0.047619	0.25	3.77273	0.00961538
SLC3A2	105	0.2	0.790476	0.00952381	0.253012	0.0120482	0.047619	0.25	3.77273	0.00961538
MMRN1	377	0.167109	0.790451	0.0424403	0.211409	0.0536913	0.253968	0.200637	3.77215	0.0443213
EHHADH	167	0.161677	0.790419	0.0479042	0.204545	0.0606061	0.296296	0.192857	3.77143	0.0503145
PAM	229	0.157205	0.790393	0.0524017	0.198895	0.0662983	0.333333	0.186528	3.77083	0.0552995
C1orf43	62	0.145161	0.790323	0.0645161	0.183673	0.0816327	0.444444	0.169811	3.76923	0.0689655
C1orf43_ENST00000368521	62	0.145161	0.790323	0.0645161	0.183673	0.0816327	0.444444	0.169811	3.76923	0.0689655
DEM1	62	0.16129	0.790323	0.0483871	0.204082	0.0612245	0.3	0.192308	3.76923	0.0508475
DNAJC5	62	0.193548	0.790323	0.016129	0.244898	0.0204082	0.0833333	0.24	3.76923	0.0163934
LRRC37A	62	0.209677	0.790323	0	0.265306	0	0	0.265306	3.76923	0
PDCD7	62	0.177419	0.790323	0.0322581	0.22449	0.0408163	0.181818	0.215686	3.76923	0.0333333
PHYHIPL_ENST00000373878	62	0.193548	0.790323	0.016129	0.244898	0.0204082	0.0833333	0.24	3.76923	0.0163934
PLSCR1	62	0.209677	0.790323	0	0.265306	0	0	0.265306	3.76923	0
HECTD2	124	0.185484	0.790323	0.0241935	0.234694	0.0306122	0.130435	0.227723	3.76923	0.0247934
NPLOC4	124	0.193548	0.790323	0.016129	0.244898	0.0204082	0.0833333	0.24	3.76923	0.0163934
PDE4D_ENST00000405755	124	0.16129	0.790323	0.0483871	0.204082	0.0612245	0.3	0.192308	3.76923	0.0508475
CTR9	248	0.173387	0.790323	0.0362903	0.219388	0.0459184	0.209302	0.209756	3.76923	0.0376569
FGFR1_ENST00000447712	372	0.177419	0.790323	0.0322581	0.22449	0.0408163	0.181818	0.215686	3.76923	0.0333333
GABRG1	329	0.170213	0.790274	0.0395137	0.215385	0.05	0.232143	0.205128	3.76812	0.0411392
FNIP2_ENST00000264433	205	0.170732	0.790244	0.0390244	0.216049	0.0493827	0.228571	0.205882	3.76744	0.0406091
FRMD7	143	0.181818	0.79021	0.027972	0.230088	0.0353982	0.153846	0.222222	3.76667	0.028777
ZNF502	143	0.125874	0.79021	0.0839161	0.159292	0.106195	0.666667	0.144	3.76667	0.0916031
ACY3	81	0.197531	0.790123	0.0123457	0.25	0.015625	0.0625	0.246154	3.76471	0.0125
KLF8	81	0.0987654	0.790123	0.111111	0.125	0.140625	1.125	0.109589	3.76471	0.125
PPP1R7	81	0.148148	0.790123	0.0617284	0.1875	0.078125	0.416667	0.173913	3.76471	0.0657895
TRDN_ENST00000546248	81	0.0987654	0.790123	0.111111	0.125	0.140625	1.125	0.109589	3.76471	0.125
COPB2	162	0.160494	0.790123	0.0493827	0.203125	0.0625	0.307692	0.191176	3.76471	0.0519481
MAP2K2_ENST00000262948	162	0.185185	0.790123	0.0246914	0.234375	0.03125	0.133333	0.227273	3.76471	0.0253165
SMC2_ENST00000303219	162	0.197531	0.790123	0.0123457	0.25	0.015625	0.0625	0.246154	3.76471	0.0125
KIAA1009	262	0.164122	0.790076	0.0458015	0.207729	0.057971	0.27907	0.196347	3.76364	0.048
NTRK3	724	0.175414	0.790055	0.0345304	0.222028	0.0437063	0.19685	0.21273	3.76316	0.0357654
LRFN5	481	0.180873	0.790021	0.029106	0.228947	0.0368421	0.16092	0.220812	3.76238	0.0299786
CD300LB	100	0.17	0.79	0.04	0.21519	0.0506329	0.235294	0.204819	3.7619	0.0416667
GPKOW	100	0.18	0.79	0.03	0.227848	0.0379747	0.166667	0.219512	3.7619	0.0309278
LIPG	100	0.2	0.79	0.01	0.253165	0.0126582	0.05	0.25	3.7619	0.010101
RAD17_ENST00000361732	100	0.14	0.79	0.07	0.177215	0.0886076	0.5	0.162791	3.7619	0.0752688
RERGL	100	0.15	0.79	0.06	0.189873	0.0759494	0.4	0.176471	3.7619	0.0638298
MCOLN3_ENST00000370589	119	0.159664	0.789916	0.0504202	0.202128	0.0638298	0.315789	0.19	3.76	0.0530973
PI15	138	0.173913	0.789855	0.0362319	0.220183	0.0458716	0.208333	0.210526	3.75862	0.037594
USP16	138	0.173913	0.789855	0.0362319	0.220183	0.0458716	0.208333	0.210526	3.75862	0.037594
ARMCX2	176	0.193182	0.789773	0.0170455	0.244604	0.0215827	0.0882353	0.239437	3.75676	0.017341
DNMT3A_ENST00000380746	566	0.120141	0.789753	0.090106	0.152125	0.114094	0.75	0.136546	3.7563	0.0990291
FHAD1_ENST00000375999	195	0.179487	0.789744	0.0307692	0.227273	0.038961	0.171429	0.21875	3.7561	0.031746
DLC1_ENST00000316609	214	0.168224	0.78972	0.0420561	0.213018	0.0532544	0.25	0.202247	3.75556	0.0439024
SUV420H1	233	0.141631	0.7897	0.0686695	0.179348	0.0869565	0.484848	0.165	3.7551	0.0737327
RPS6KA4_ENST00000334205	271	0.180812	0.789668	0.0295203	0.228972	0.0373832	0.163265	0.220721	3.75439	0.0304183
RGPD4_ENST00000354986	290	0.158621	0.789655	0.0517241	0.200873	0.0655022	0.326087	0.188525	3.7541	0.0545455
EP300	1093	0.0795974	0.78957	0.130833	0.100811	0.165701	1.64368	0.0864811	3.75217	0.150526
ATG3	57	0.175439	0.789474	0.0350877	0.222222	0.0444444	0.2	0.212766	3.75	0.0363636
AUH	57	0.192982	0.789474	0.0175439	0.244444	0.0222222	0.0909091	0.23913	3.75	0.0178571
BDH2	57	0.175439	0.789474	0.0350877	0.222222	0.0444444	0.2	0.212766	3.75	0.0363636
CD46_ENST00000322875	57	0.210526	0.789474	0	0.266667	0	0	0.266667	3.75	0
CLASP2_ENST00000333778	57	0.157895	0.789474	0.0526316	0.2	0.0666667	0.333333	0.1875	3.75	0.0555556
CREB3L2_ENST00000452463	57	0.175439	0.789474	0.0350877	0.222222	0.0444444	0.2	0.212766	3.75	0.0363636
DNAJB2_ENST00000392086	57	0.157895	0.789474	0.0526316	0.2	0.0666667	0.333333	0.1875	3.75	0.0555556
ENSG00000173213	57	0.210526	0.789474	0	0.266667	0	0	0.266667	3.75	0
HSD11B1L_ENST00000423665	57	0.210526	0.789474	0	0.266667	0	0	0.266667	3.75	0
IFI35	57	0.192982	0.789474	0.0175439	0.244444	0.0222222	0.0909091	0.23913	3.75	0.0178571
IFNA2	57	0.192982	0.789474	0.0175439	0.244444	0.0222222	0.0909091	0.23913	3.75	0.0178571
MUC1	57	0.192982	0.789474	0.0175439	0.244444	0.0222222	0.0909091	0.23913	3.75	0.0178571
NDEL1_ENST00000334527	57	0.157895	0.789474	0.0526316	0.2	0.0666667	0.333333	0.1875	3.75	0.0555556
USP17L30	57	0.210526	0.789474	0	0.266667	0	0	0.266667	3.75	0
YIPF3	57	0.210526	0.789474	0	0.266667	0	0	0.266667	3.75	0
ADRB3	76	0.184211	0.789474	0.0263158	0.233333	0.0333333	0.142857	0.225806	3.75	0.027027
AKR1C3	76	0.131579	0.789474	0.0789474	0.166667	0.1	0.6	0.151515	3.75	0.0857143
APOL6	76	0.210526	0.789474	0	0.266667	0	0	0.266667	3.75	0
BAIAP2_ENST00000428708	76	0.157895	0.789474	0.0526316	0.2	0.0666667	0.333333	0.1875	3.75	0.0555556
C16orf72	76	0.171053	0.789474	0.0394737	0.216667	0.05	0.230769	0.206349	3.75	0.0410959
KIAA0825	76	0.118421	0.789474	0.0921053	0.15	0.116667	0.777778	0.134328	3.75	0.101449
PSTPIP2_ENST00000409746	76	0.157895	0.789474	0.0526316	0.2	0.0666667	0.333333	0.1875	3.75	0.0555556
RNF112_ENST00000453070	76	0.210526	0.789474	0	0.266667	0	0	0.266667	3.75	0
SLC23A3	76	0.131579	0.789474	0.0789474	0.166667	0.1	0.6	0.151515	3.75	0.0857143
ZNF639	76	0.184211	0.789474	0.0263158	0.233333	0.0333333	0.142857	0.225806	3.75	0.027027
PRKAA1	95	0.136842	0.789474	0.0736842	0.173333	0.0933333	0.538462	0.158537	3.75	0.0795455
ST3GAL6	95	0.189474	0.789474	0.0210526	0.24	0.0266667	0.111111	0.233766	3.75	0.0215054
TMEM209	95	0.157895	0.789474	0.0526316	0.2	0.0666667	0.333333	0.1875	3.75	0.0555556
TOR1AIP2	95	0.178947	0.789474	0.0315789	0.226667	0.04	0.176471	0.217949	3.75	0.0326087
EFCAB7	114	0.131579	0.789474	0.0789474	0.166667	0.1	0.6	0.151515	3.75	0.0857143
PCMTD1	114	0.149123	0.789474	0.0614035	0.188889	0.0777778	0.411765	0.175258	3.75	0.0654206
C20orf114	133	0.210526	0.789474	0	0.266667	0	0	0.266667	3.75	0
DBF4B_ENST00000315005	133	0.18797	0.789474	0.0225564	0.238095	0.0285714	0.12	0.231481	3.75	0.0230769
NEU4	133	0.195489	0.789474	0.0150376	0.247619	0.0190476	0.0769231	0.242991	3.75	0.0152672
CIZ1	152	0.144737	0.789474	0.0657895	0.183333	0.0833333	0.454545	0.169231	3.75	0.0704225
DOK6	152	0.177632	0.789474	0.0328947	0.225	0.0416667	0.185185	0.216	3.75	0.0340136
KLKB1	185	0.172973	0.789189	0.0378378	0.219178	0.0479452	0.21875	0.20915	3.74359	0.0393258
PDE4D_ENST00000340635	147	0.170068	0.789116	0.0408163	0.215517	0.0517241	0.24	0.204918	3.74194	0.0425532
SP140L_ENST00000415673	147	0.170068	0.789116	0.0408163	0.215517	0.0517241	0.24	0.204918	3.74194	0.0425532
LHCGR	294	0.163265	0.789116	0.047619	0.206897	0.0603448	0.291667	0.195122	3.74194	0.05
TFEC	128	0.179688	0.789062	0.03125	0.227723	0.039604	0.173913	0.219048	3.74074	0.0322581
CAST	109	0.165138	0.788991	0.0458716	0.209302	0.0581395	0.277778	0.197802	3.73913	0.0480769
CPSF3L	109	0.174312	0.788991	0.0366972	0.22093	0.0465116	0.210526	0.211111	3.73913	0.0380952
FAM169A	109	0.183486	0.788991	0.0275229	0.232558	0.0348837	0.15	0.224719	3.73913	0.0283019
STRN3	109	0.155963	0.788991	0.0550459	0.197674	0.0697674	0.352941	0.184783	3.73913	0.0582524
B3GNT4	90	0.2	0.788889	0.0111111	0.253521	0.0140845	0.0555556	0.25	3.73684	0.011236
CDC20	90	0.211111	0.788889	0	0.267606	0	0	0.267606	3.73684	0
EPB49	90	0.188889	0.788889	0.0222222	0.239437	0.028169	0.117647	0.232877	3.73684	0.0227273
SLC1A4	90	0.211111	0.788889	0	0.267606	0	0	0.267606	3.73684	0
TBX15	180	0.166667	0.788889	0.0444444	0.211268	0.056338	0.266667	0.2	3.73684	0.0465116
TBX15_ENST00000369429	180	0.161111	0.788889	0.05	0.204225	0.0633803	0.310345	0.192053	3.73684	0.0526316
EEF1A1	161	0.180124	0.78882	0.0310559	0.228346	0.0393701	0.172414	0.219697	3.73529	0.0320513
ANKAR	232	0.163793	0.788793	0.0474138	0.20765	0.0601093	0.289474	0.195876	3.73469	0.0497738
AMH	71	0.211268	0.788732	0	0.267857	0	0	0.267857	3.73333	0
BBS5	71	0.140845	0.788732	0.0704225	0.178571	0.0892857	0.5	0.163934	3.73333	0.0757576
DPCR1_ENST00000450344	71	0.15493	0.788732	0.056338	0.196429	0.0714286	0.363636	0.183333	3.73333	0.0597015
RPGRIP1_ENST00000382933	71	0.183099	0.788732	0.028169	0.232143	0.0357143	0.153846	0.224138	3.73333	0.0289855
TYMS	71	0.183099	0.788732	0.028169	0.232143	0.0357143	0.153846	0.224138	3.73333	0.0289855
ZNF843	71	0.211268	0.788732	0	0.267857	0	0	0.267857	3.73333	0
ZNF284	142	0.15493	0.788732	0.056338	0.196429	0.0714286	0.363636	0.183333	3.73333	0.0597015
BUD13	123	0.178862	0.788618	0.0325203	0.226804	0.0412371	0.181818	0.217822	3.73077	0.0336134
STT3B	123	0.178862	0.788618	0.0325203	0.226804	0.0412371	0.181818	0.217822	3.73077	0.0336134
EPHA3_ENST00000452448	473	0.112051	0.788584	0.0993658	0.142091	0.126005	0.886792	0.12619	3.73	0.110329
FGFR4	350	0.157143	0.788571	0.0542857	0.199275	0.0688406	0.345455	0.186441	3.72973	0.0574018
SLC9A10	331	0.166163	0.78852	0.0453172	0.210728	0.0574713	0.272727	0.199275	3.72857	0.0474684
FAM22A_ENST00000381707	52	0.173077	0.788462	0.0384615	0.219512	0.0487805	0.222222	0.209302	3.72727	0.04
LRRC70	52	0.134615	0.788462	0.0769231	0.170732	0.097561	0.571429	0.155556	3.72727	0.0833333
RPL9	52	0.211538	0.788462	0	0.268293	0	0	0.268293	3.72727	0
RWDD3	52	0.192308	0.788462	0.0192308	0.243902	0.0243902	0.1	0.238095	3.72727	0.0196078
SCNM1	52	0.153846	0.788462	0.0576923	0.195122	0.0731707	0.375	0.181818	3.72727	0.0612245
TMEM192_ENST00000506087	52	0.211538	0.788462	0	0.268293	0	0	0.268293	3.72727	0
ASH2L	104	0.153846	0.788462	0.0576923	0.195122	0.0731707	0.375	0.181818	3.72727	0.0612245
EMID1	104	0.173077	0.788462	0.0384615	0.219512	0.0487805	0.222222	0.209302	3.72727	0.04
HIST1H2AA	104	0.192308	0.788462	0.0192308	0.243902	0.0243902	0.1	0.238095	3.72727	0.0196078
NKAP	104	0.163462	0.788462	0.0480769	0.207317	0.0609756	0.294118	0.195402	3.72727	0.0505051
SH3D21_ENST00000453908	104	0.192308	0.788462	0.0192308	0.243902	0.0243902	0.1	0.238095	3.72727	0.0196078
SLC4A7_ENST00000455077	208	0.134615	0.788462	0.0769231	0.170732	0.097561	0.571429	0.155556	3.72727	0.0833333
NTRK3_ENST00000317501	416	0.1875	0.788462	0.0240385	0.237805	0.0304878	0.128205	0.230769	3.72727	0.0246305
SNRPN	137	0.160584	0.788321	0.0510949	0.203704	0.0648148	0.318182	0.191304	3.72414	0.0538462
KIAA0913_ENST00000412131	359	0.178273	0.788301	0.0334262	0.226148	0.0424028	0.1875	0.216949	3.72368	0.0345821
AC012100.1	85	0.176471	0.788235	0.0352941	0.223881	0.0447761	0.2	0.214286	3.72222	0.0365854
C4B	85	0.211765	0.788235	0	0.268657	0	0	0.268657	3.72222	0
CTDSPL2	85	0.105882	0.788235	0.105882	0.134328	0.134328	1	0.118421	3.72222	0.118421
EIF2B4_ENST00000451130	85	0.164706	0.788235	0.0470588	0.208955	0.0597015	0.285714	0.197183	3.72222	0.0493827
RBM22	85	0.188235	0.788235	0.0235294	0.238806	0.0298507	0.125	0.231884	3.72222	0.0240964
TDP2	85	0.176471	0.788235	0.0352941	0.223881	0.0447761	0.2	0.214286	3.72222	0.0365854
USP12	85	0.176471	0.788235	0.0352941	0.223881	0.0447761	0.2	0.214286	3.72222	0.0365854
ZNF763	85	0.129412	0.788235	0.0823529	0.164179	0.104478	0.636364	0.148649	3.72222	0.0897436
AGXT2	170	0.2	0.788235	0.0117647	0.253731	0.0149254	0.0588235	0.25	3.72222	0.0119048
FAM46C	170	0.176471	0.788235	0.0352941	0.223881	0.0447761	0.2	0.214286	3.72222	0.0365854
AHCYL2	118	0.144068	0.788136	0.0677966	0.182796	0.0860215	0.470588	0.168317	3.72	0.0727273
APBB3	118	0.186441	0.788136	0.0254237	0.236559	0.0322581	0.136364	0.229167	3.72	0.026087
INPP4B_ENST00000509777	354	0.138418	0.788136	0.0734463	0.175627	0.09319	0.530612	0.160656	3.72	0.0792683
MCM8	151	0.152318	0.788079	0.0596026	0.193277	0.0756303	0.391304	0.179688	3.71875	0.0633803
MAP3K13_ENST00000535426	302	0.139073	0.788079	0.0728477	0.176471	0.092437	0.52381	0.161538	3.71875	0.0785714
SORBS1	184	0.179348	0.788043	0.0326087	0.227586	0.0413793	0.181818	0.218543	3.71795	0.0337079
COL19A1	481	0.16632	0.787942	0.045738	0.211082	0.0580475	0.275	0.199501	3.71569	0.0479303
AR_ENST00000544984	547	0.164534	0.787934	0.047532	0.208817	0.0603248	0.288889	0.196937	3.71552	0.049904
SDCBP	66	0.181818	0.787879	0.030303	0.230769	0.0384615	0.166667	0.222222	3.71429	0.03125
UHMK1	66	0.19697	0.787879	0.0151515	0.25	0.0192308	0.0769231	0.245283	3.71429	0.0153846
USP17L26	66	0.212121	0.787879	0	0.269231	0	0	0.269231	3.71429	0
VPS4B	66	0.166667	0.787879	0.0454545	0.211538	0.0576923	0.272727	0.2	3.71429	0.047619
ZNF655_ENST00000424881	66	0.166667	0.787879	0.0454545	0.211538	0.0576923	0.272727	0.2	3.71429	0.047619
CDC14B_ENST00000375242	99	0.191919	0.787879	0.020202	0.24359	0.025641	0.105263	0.2375	3.71429	0.0206186
CTCFL_ENST00000433949	99	0.131313	0.787879	0.0808081	0.166667	0.102564	0.615385	0.151163	3.71429	0.0879121
ZMPSTE24	99	0.181818	0.787879	0.030303	0.230769	0.0384615	0.166667	0.222222	3.71429	0.03125
MAGEB2	132	0.189394	0.787879	0.0227273	0.240385	0.0288462	0.12	0.233645	3.71429	0.0232558
C3orf77	165	0.187879	0.787879	0.0242424	0.238462	0.0307692	0.129032	0.231343	3.71429	0.0248447
AP3B1	198	0.156566	0.787879	0.0555556	0.198718	0.0705128	0.354839	0.185629	3.71429	0.0588235
KIAA1731_ENST00000325212	264	0.132576	0.787879	0.0795455	0.168269	0.100962	0.6	0.152838	3.71429	0.0864198
TNNI3K	363	0.165289	0.787879	0.046832	0.20979	0.0594406	0.283333	0.19802	3.71429	0.0491329
MAP2K7_ENST00000545011	179	0.167598	0.787709	0.0446927	0.212766	0.0567376	0.266667	0.201342	3.71053	0.0467836
TUSC3	179	0.178771	0.787709	0.0335196	0.22695	0.0425532	0.1875	0.217687	3.71053	0.0346821
PPP1R12A	146	0.150685	0.787671	0.0616438	0.191304	0.0782609	0.409091	0.177419	3.70968	0.0656934
USP1	113	0.176991	0.787611	0.0353982	0.224719	0.0449438	0.2	0.215054	3.70833	0.0366972
UTP6	113	0.176991	0.787611	0.0353982	0.224719	0.0449438	0.2	0.215054	3.70833	0.0366972
ARHGEF7	193	0.176166	0.787565	0.0362694	0.223684	0.0460526	0.205882	0.213836	3.70732	0.0376344
HFM1	386	0.15544	0.787565	0.0569948	0.197368	0.0723684	0.366667	0.184049	3.70732	0.0604396
ATP6AP2_ENST00000378438	80	0.15	0.7875	0.0625	0.190476	0.0793651	0.416667	0.176471	3.70588	0.0666667
Q96M56_HUMAN	80	0.1375	0.7875	0.075	0.174603	0.0952381	0.545455	0.15942	3.70588	0.0810811
S100PBP	80	0.1875	0.7875	0.025	0.238095	0.031746	0.133333	0.230769	3.70588	0.025641
SLC38A11	80	0.1875	0.7875	0.025	0.238095	0.031746	0.133333	0.230769	3.70588	0.025641
STRIP2	80	0.1625	0.7875	0.05	0.206349	0.0634921	0.307692	0.19403	3.70588	0.0526316
UTP3	80	0.1375	0.7875	0.075	0.174603	0.0952381	0.545455	0.15942	3.70588	0.0810811
DPY19L3	160	0.1875	0.7875	0.025	0.238095	0.031746	0.133333	0.230769	3.70588	0.025641
MIPEP	127	0.15748	0.787402	0.0551181	0.2	0.07	0.35	0.186916	3.7037	0.0583333
PALLD_ENST00000335742	174	0.166667	0.787356	0.045977	0.211679	0.0583942	0.275862	0.2	3.7027	0.0481928
MUC20	221	0.20362	0.78733	0.00904977	0.258621	0.0114943	0.0444444	0.255682	3.70213	0.00913242
TTC3	442	0.167421	0.78733	0.0452489	0.212644	0.0574713	0.27027	0.201087	3.70213	0.0473934
FAM134A	94	0.180851	0.787234	0.0319149	0.22973	0.0405405	0.176471	0.220779	3.7	0.032967
ZNF434	94	0.148936	0.787234	0.0638298	0.189189	0.0810811	0.428571	0.175	3.7	0.0681818
FBXW8	141	0.198582	0.787234	0.0141844	0.252252	0.018018	0.0714286	0.247788	3.7	0.0143885
GC_ENST00000504199	141	0.170213	0.787234	0.0425532	0.216216	0.0540541	0.25	0.205128	3.7	0.0444444
MTA1	188	0.207447	0.787234	0.00531915	0.263514	0.00675676	0.025641	0.261745	3.7	0.00534759
PMS1	282	0.106383	0.787234	0.106383	0.135135	0.135135	1	0.119048	3.7	0.119048
PITRM1_ENST00000224949	202	0.178218	0.787129	0.0346535	0.226415	0.0440252	0.194444	0.216867	3.69767	0.0358974
MCCC1	155	0.135484	0.787097	0.0774194	0.172131	0.0983607	0.571429	0.156716	3.69697	0.0839161
ANKS4B	108	0.166667	0.787037	0.0462963	0.211765	0.0588235	0.277778	0.2	3.69565	0.0485437
CEP128_ENST00000216517	108	0.157407	0.787037	0.0555556	0.2	0.0705882	0.352941	0.186813	3.69565	0.0588235
GALNT1	108	0.175926	0.787037	0.037037	0.223529	0.0470588	0.210526	0.213483	3.69565	0.0384615
ENSG00000143674	169	0.12426	0.786982	0.0887574	0.157895	0.112782	0.714286	0.141892	3.69444	0.0974026
HGS	169	0.195266	0.786982	0.0177515	0.24812	0.0225564	0.0909091	0.242647	3.69444	0.0180723
ZFP82	169	0.177515	0.786982	0.035503	0.225564	0.0451128	0.2	0.215827	3.69444	0.0368098
ANKRD26_ENST00000436985	230	0.156522	0.786957	0.0565217	0.198895	0.0718232	0.361111	0.185567	3.69388	0.0599078
ITSN2_ENST00000406921	230	0.16087	0.786957	0.0521739	0.20442	0.0662983	0.324324	0.19171	3.69388	0.0550459
C20orf107	61	0.131148	0.786885	0.0819672	0.166667	0.104167	0.625	0.150943	3.69231	0.0892857
DHRS7	61	0.180328	0.786885	0.0327869	0.229167	0.0416667	0.181818	0.22	3.69231	0.0338983
FRG1	61	0.163934	0.786885	0.0491803	0.208333	0.0625	0.3	0.196078	3.69231	0.0517241
NDNL2	61	0.147541	0.786885	0.0655738	0.1875	0.0833333	0.444444	0.173077	3.69231	0.0701754
RNF135	61	0.180328	0.786885	0.0327869	0.229167	0.0416667	0.181818	0.22	3.69231	0.0338983
SHISA7	61	0.196721	0.786885	0.0163934	0.25	0.0208333	0.0833333	0.244898	3.69231	0.0166667
TOMM40L	61	0.213115	0.786885	0	0.270833	0	0	0.270833	3.69231	0
WDR89	61	0.147541	0.786885	0.0655738	0.1875	0.0833333	0.444444	0.173077	3.69231	0.0701754
YWHAE_ENST00000264335	61	0.196721	0.786885	0.0163934	0.25	0.0208333	0.0833333	0.244898	3.69231	0.0166667
FOXN3	122	0.204918	0.786885	0.00819672	0.260417	0.0104167	0.04	0.257732	3.69231	0.00826446
GTPBP2	122	0.172131	0.786885	0.0409836	0.21875	0.0520833	0.238095	0.207921	3.69231	0.042735
MARCH11	122	0.163934	0.786885	0.0491803	0.208333	0.0625	0.3	0.196078	3.69231	0.0517241
PUM2_ENST00000361078	122	0.147541	0.786885	0.0655738	0.1875	0.0833333	0.444444	0.173077	3.69231	0.0701754
EIF4ENIF1	183	0.15847	0.786885	0.0546448	0.201389	0.0694444	0.344828	0.188312	3.69231	0.0578035
MAGEC3_ENST00000544766	183	0.153005	0.786885	0.0601093	0.194444	0.0763889	0.392857	0.180645	3.69231	0.0639535
EPHA7	793	0.150063	0.786885	0.0630517	0.190705	0.0801282	0.420168	0.176558	3.69231	0.0672948
NTRK3_ENST00000360948	699	0.180258	0.786838	0.0329041	0.229091	0.0418182	0.18254	0.219895	3.69128	0.0340237
GRAMD1C	136	0.125	0.786765	0.0882353	0.158879	0.11215	0.705882	0.142857	3.68966	0.0967742
FAM134C	75	0.16	0.786667	0.0533333	0.20339	0.0677966	0.333333	0.190476	3.6875	0.056338
Q6ZSY1_HUMAN	75	0.186667	0.786667	0.0266667	0.237288	0.0338983	0.142857	0.229508	3.6875	0.0273973
TSPAN11	75	0.186667	0.786667	0.0266667	0.237288	0.0338983	0.142857	0.229508	3.6875	0.0273973
PROL1	150	0.18	0.786667	0.0333333	0.228814	0.0423729	0.185185	0.219512	3.6875	0.0344828
NKX2-1	164	0.182927	0.786585	0.0304878	0.232558	0.0387597	0.166667	0.223881	3.68571	0.0314465
C10orf129_ENST00000341686	89	0.146067	0.786517	0.0674157	0.185714	0.0857143	0.461538	0.171053	3.68421	0.0722892
GPX5	89	0.202247	0.786517	0.011236	0.257143	0.0142857	0.0555556	0.253521	3.68421	0.0113636
NCR2	89	0.179775	0.786517	0.0337079	0.228571	0.0428571	0.1875	0.219178	3.68421	0.0348837
PPAT	89	0.179775	0.786517	0.0337079	0.228571	0.0428571	0.1875	0.219178	3.68421	0.0348837
BRD4_ENST00000360016	267	0.183521	0.786517	0.0299625	0.233333	0.0380952	0.163265	0.224771	3.68421	0.030888
MAP2K7	192	0.166667	0.786458	0.046875	0.211921	0.0596026	0.28125	0.2	3.68293	0.0491803
CLNK	103	0.194175	0.786408	0.0194175	0.246914	0.0246914	0.1	0.240964	3.68182	0.019802
CLNK_ENST00000226951	103	0.194175	0.786408	0.0194175	0.246914	0.0246914	0.1	0.240964	3.68182	0.019802
ISPD_ENST00000407010	103	0.135922	0.786408	0.0776699	0.17284	0.0987654	0.571429	0.157303	3.68182	0.0842105
MYLK4_ENST00000268446	103	0.203883	0.786408	0.00970874	0.259259	0.0123457	0.047619	0.256098	3.68182	0.00980392
TCHP	103	0.116505	0.786408	0.0970874	0.148148	0.123457	0.833333	0.131868	3.68182	0.107527
LIN7A	117	0.179487	0.786325	0.034188	0.228261	0.0434783	0.190476	0.21875	3.68	0.0353982
MPP4_ENST00000359962	117	0.179487	0.786325	0.034188	0.228261	0.0434783	0.190476	0.21875	3.68	0.0353982
RFX6	365	0.169863	0.786301	0.0438356	0.216028	0.0557491	0.258065	0.20462	3.67949	0.0458453
NUP153_ENST00000537253	276	0.173913	0.786232	0.0398551	0.221198	0.0506912	0.229167	0.210526	3.67797	0.0415094
PHF16	145	0.158621	0.786207	0.0551724	0.201754	0.0701754	0.347826	0.188525	3.67742	0.0583942
KIAA0776	159	0.157233	0.786164	0.0566038	0.2	0.072	0.36	0.186567	3.67647	0.06
PRKACA	159	0.188679	0.786164	0.0251572	0.24	0.032	0.133333	0.232558	3.67647	0.0258065
UGT2A3	159	0.157233	0.786164	0.0566038	0.2	0.072	0.36	0.186567	3.67647	0.06
HSPH1	173	0.184971	0.786127	0.0289017	0.235294	0.0367647	0.15625	0.22695	3.67568	0.0297619
TUSC3_ENST00000503731	173	0.179191	0.786127	0.0346821	0.227941	0.0441176	0.193548	0.21831	3.67568	0.0359281
B3GNT8	56	0.214286	0.785714	0	0.272727	0	0	0.272727	3.66667	0
C17orf39	56	0.178571	0.785714	0.0357143	0.227273	0.0454545	0.2	0.217391	3.66667	0.037037
CEP57L1	56	0.142857	0.785714	0.0714286	0.181818	0.0909091	0.5	0.166667	3.66667	0.0769231
CLN5	56	0.178571	0.785714	0.0357143	0.227273	0.0454545	0.2	0.217391	3.66667	0.037037
INO80B	56	0.196429	0.785714	0.0178571	0.25	0.0227273	0.0909091	0.244444	3.66667	0.0181818
KL_ENST00000426690	56	0.196429	0.785714	0.0178571	0.25	0.0227273	0.0909091	0.244444	3.66667	0.0181818
LYSMD3	56	0.160714	0.785714	0.0535714	0.204545	0.0681818	0.333333	0.191489	3.66667	0.0566038
MED4	56	0.160714	0.785714	0.0535714	0.204545	0.0681818	0.333333	0.191489	3.66667	0.0566038
SNRPA1	56	0.214286	0.785714	0	0.272727	0	0	0.272727	3.66667	0
WWC2_ENST00000508747	56	0.178571	0.785714	0.0357143	0.227273	0.0454545	0.2	0.217391	3.66667	0.037037
COX15	70	0.2	0.785714	0.0142857	0.254545	0.0181818	0.0714286	0.25	3.66667	0.0144928
CTGF	70	0.214286	0.785714	0	0.272727	0	0	0.272727	3.66667	0
ELL3	70	0.171429	0.785714	0.0428571	0.218182	0.0545455	0.25	0.206897	3.66667	0.0447761
FNTA	70	0.157143	0.785714	0.0571429	0.2	0.0727273	0.363636	0.186441	3.66667	0.0606061
ILK_ENST00000299421	70	0.2	0.785714	0.0142857	0.254545	0.0181818	0.0714286	0.25	3.66667	0.0144928
METTL17_ENST00000382985	70	0.171429	0.785714	0.0428571	0.218182	0.0545455	0.25	0.206897	3.66667	0.0447761
MRPS9	70	0.171429	0.785714	0.0428571	0.218182	0.0545455	0.25	0.206897	3.66667	0.0447761
NRSN1_ENST00000378477	70	0.171429	0.785714	0.0428571	0.218182	0.0545455	0.25	0.206897	3.66667	0.0447761
PLCB1_ENST00000439627	70	0.171429	0.785714	0.0428571	0.218182	0.0545455	0.25	0.206897	3.66667	0.0447761
RMND5A	70	0.171429	0.785714	0.0428571	0.218182	0.0545455	0.25	0.206897	3.66667	0.0447761
STEAP1	70	0.171429	0.785714	0.0428571	0.218182	0.0545455	0.25	0.206897	3.66667	0.0447761
SUV39H2	70	0.142857	0.785714	0.0714286	0.181818	0.0909091	0.5	0.166667	3.66667	0.0769231
ZNF280D_ENST00000396245	70	0.185714	0.785714	0.0285714	0.236364	0.0363636	0.153846	0.22807	3.66667	0.0294118
[truncated: 19,308 more rows]

## Sheet: N100
Gene name; N100 (=13803)	Number of substitutions	fS	fM	fN	rSM	rNM	rNS	rSMN	rMSN	rNSM
KRAS	10661	0.00384579	0.995498	0.000656599	0.00386319	0.000659568	0.170732	0.00386064	221.104	0.00065703
KRAS_ENST00000256078	4842	0.00743494	0.991945	0.000619579	0.00749532	0.00062461	0.0833333	0.00749064	123.154	0.000619963
IDH1	1912	0.00732218	0.989017	0.00366109	0.00740349	0.00370175	0.5	0.00737619	90.0476	0.00367454
NRAS	1449	0.00759144	0.988958	0.00345066	0.0076762	0.00348918	0.454545	0.00764951	89.5625	0.0034626
PIK3CA	5839	0.0101045	0.98373	0.00616544	0.0102716	0.00626741	0.610169	0.0102076	60.4632	0.00620369
PIK3CA_ENST00000263967	4241	0.0103749	0.98208	0.00754539	0.0105642	0.00768307	0.727273	0.0104837	54.8026	0.00760276
BRAF	5024	0.0147293	0.980494	0.00477707	0.0150223	0.00487211	0.324324	0.0149495	50.2653	0.0048
HRAS	737	0.0149254	0.979647	0.00542741	0.0152355	0.00554017	0.363636	0.0151515	48.1333	0.00545703
CTNNB1	2518	0.0142971	0.971803	0.0138999	0.0147119	0.0143032	0.972222	0.0145044	34.4648	0.0140959
H3F3A	265	0.0264151	0.969811	0.00377358	0.0272374	0.00389105	0.142857	0.0271318	32.125	0.00378788
HRAS_ENST00000397594	369	0.0243902	0.96206	0.0135501	0.0253521	0.0140845	0.555556	0.025	25.3571	0.0137363
MYD88	420	0.0309524	0.954762	0.0142857	0.032419	0.0149626	0.461538	0.031941	21.1053	0.0144928
JAK2	1888	0.0291314	0.947564	0.0233051	0.0307434	0.0245947	0.8	0.0300055	18.0707	0.0238612
SF3B1	1209	0.0430108	0.945409	0.0115798	0.0454943	0.0122485	0.269231	0.0449438	17.3182	0.0117155
GNAS	724	0.0345304	0.94337	0.0220994	0.0366032	0.0234261	0.64	0.0357654	16.6585	0.0225989
RHOA	308	0.0487013	0.941558	0.00974026	0.0517241	0.0103448	0.2	0.0511945	16.1111	0.00983607
SPOP	423	0.0283688	0.940898	0.0307329	0.0301508	0.0326633	1.08333	0.0291971	15.92	0.0317073
IDH2	404	0.0420792	0.935644	0.0222772	0.0449735	0.0238095	0.529412	0.0439276	14.5385	0.0227848
NFE2L2	610	0.0409836	0.934426	0.0245902	0.0438596	0.0263158	0.6	0.042735	14.25	0.0252101
U2AF1	337	0.0534125	0.931751	0.0148368	0.0573248	0.0159236	0.277778	0.0564263	13.6522	0.0150602
ERCC2_ENST00000485403	184	0.0652174	0.929348	0.00543478	0.0701754	0.00584795	0.0833333	0.0697674	13.1538	0.00546448
EIF1AX	126	0.0396825	0.928571	0.031746	0.042735	0.034188	0.8	0.0413223	13	0.0327869
FGFR3	1284	0.0700935	0.928349	0.00155763	0.0755034	0.00167785	0.0222222	0.0753769	12.9565	0.00156006
AKT1	509	0.0667976	0.923379	0.00982318	0.0723404	0.0106383	0.147059	0.0715789	12.0513	0.00992063
SRSF2	274	0.0620438	0.923358	0.0145985	0.0671937	0.0158103	0.235294	0.0661479	12.0476	0.0148148
MED12	2017	0.0525533	0.923153	0.0242935	0.056928	0.0263158	0.462264	0.0554683	12.0129	0.0248984
KCNJ5	694	0.0720461	0.919308	0.00864553	0.0783699	0.00940439	0.12	0.0776398	11.3929	0.00872093
ERBB2_ENST00000541774	578	0.0692042	0.918685	0.0121107	0.0753296	0.0131827	0.175	0.0743494	11.2979	0.0122592
FOXL2	268	0.0783582	0.914179	0.00746269	0.0857143	0.00816327	0.0952381	0.0850202	10.6522	0.0075188
U2AF1_ENST00000380276	277	0.0685921	0.913357	0.0180505	0.0750988	0.0197628	0.263158	0.0736434	10.5417	0.0183824
PRB3	150	0.0533333	0.906667	0.04	0.0588235	0.0441176	0.75	0.056338	9.71429	0.0416667
EGFR	1890	0.0814815	0.906349	0.0121693	0.0899008	0.0134267	0.149351	0.0887097	9.67797	0.0123192
MAP2K1	272	0.0772059	0.900735	0.0220588	0.0857143	0.0244898	0.285714	0.0836653	9.07407	0.0225564
ERBB2	969	0.0897833	0.895769	0.0144479	0.10023	0.016129	0.16092	0.0986395	8.59406	0.0146597
AR_ENST00000396043	237	0.0421941	0.894515	0.0632911	0.0471698	0.0707547	1.5	0.0440529	8.48	0.0675676
RAC1	167	0.101796	0.892216	0.00598802	0.114094	0.00671141	0.0588235	0.113333	8.27778	0.0060241
KLHL23	100	0.09	0.89	0.02	0.101124	0.0224719	0.222222	0.0989011	8.09091	0.0204082
ERBB3_ENST00000411731	145	0.0758621	0.889655	0.0344828	0.0852713	0.0387597	0.454545	0.0820896	8.0625	0.0357143
MYCN	286	0.0909091	0.888112	0.020979	0.102362	0.023622	0.230769	0.1	7.9375	0.0214286
PTPRS_ENST00000262963	416	0.0865385	0.887019	0.0264423	0.097561	0.0298103	0.305556	0.0947368	7.85106	0.0271605
ERBB3_ENST00000267101	767	0.0925684	0.886571	0.0208605	0.104412	0.0235294	0.225352	0.102011	7.81609	0.0213049
PRB3_ENST00000538488	149	0.0671141	0.885906	0.0469799	0.0757576	0.0530303	0.7	0.0719424	7.76471	0.0492958
KIT	1081	0.0980574	0.884366	0.0175763	0.110879	0.0198745	0.179245	0.108718	7.648	0.0178908
PTPN11	527	0.0910816	0.880455	0.028463	0.103448	0.0323276	0.3125	0.100209	7.36508	0.0292969
RUNX1_ENST00000344691	141	0.035461	0.879433	0.0851064	0.0403226	0.0967742	2.4	0.0367647	7.29412	0.0930233
RAC1_ENST00000356142	164	0.115854	0.878049	0.00609756	0.131944	0.00694444	0.0526316	0.131034	7.2	0.00613497
RARA_ENST00000394081	187	0.112299	0.877005	0.0106952	0.128049	0.0121951	0.0952381	0.126506	7.13043	0.0108108
RUNX1_ENST00000325074	137	0.0364964	0.875912	0.0875912	0.0416667	0.1	2.4	0.0378788	7.05882	0.096
PPP2R1A	441	0.0997732	0.875283	0.0249433	0.11399	0.0284974	0.25	0.110831	7.01818	0.0255814
EGFR_ENST00000342916	272	0.113971	0.875	0.0110294	0.130252	0.012605	0.0967742	0.128631	7	0.0111524
ERCC2_ENST00000391945	349	0.114613	0.873926	0.0114613	0.131148	0.0131148	0.1	0.12945	6.93182	0.0115942
TXLNA	110	0.118182	0.872727	0.00909091	0.135417	0.0104167	0.0769231	0.134021	6.85714	0.00917431
ERBB3	814	0.100737	0.872236	0.027027	0.115493	0.0309859	0.268293	0.112022	6.82692	0.0277778
ZNF844	234	0.106838	0.871795	0.0213675	0.122549	0.0245098	0.2	0.119617	6.8	0.0218341
TBL1XR1	225	0.0933333	0.871111	0.0355556	0.107143	0.0408163	0.380952	0.102941	6.75862	0.0368664
YAP1_ENST00000282441	153	0.0915033	0.869281	0.0392157	0.105263	0.0451128	0.428571	0.100719	6.65	0.0408163
SSX5	145	0.131034	0.868966	0	0.150794	0	0	0.150794	6.63158	0
JAK3_ENST00000534444	243	0.0658436	0.868313	0.0658436	0.0758294	0.0758294	1	0.0704846	6.59375	0.0704846
MDM2	167	0.0958084	0.868263	0.0359281	0.110345	0.0413793	0.375	0.10596	6.59091	0.0372671
ESR1	514	0.105058	0.867704	0.0272374	0.121076	0.0313901	0.259259	0.117391	6.55882	0.028
PIAS2	136	0.110294	0.867647	0.0220588	0.127119	0.0254237	0.2	0.123967	6.55556	0.0225564
RSL1D1	113	0.106195	0.867257	0.0265487	0.122449	0.0306122	0.25	0.118812	6.53333	0.0272727
RECQL4	352	0.110795	0.866477	0.0227273	0.127869	0.0262295	0.205128	0.124601	6.48936	0.0232558
TRAF7	306	0.107843	0.866013	0.0261438	0.124528	0.0301887	0.242424	0.120879	6.46341	0.0268456
RARA	216	0.125	0.865741	0.00925926	0.144385	0.0106952	0.0740741	0.142857	6.44828	0.00934579
FLT3	755	0.101987	0.864901	0.0331126	0.117917	0.0382848	0.324675	0.113569	6.40196	0.0342466
FGFR3_ENST00000340107	599	0.130217	0.864775	0.00500835	0.150579	0.00579151	0.0384615	0.149712	6.39506	0.00503356
GATA2	303	0.10231	0.864686	0.0330033	0.118321	0.0381679	0.322581	0.113971	6.39024	0.0341297
FGFR2	611	0.106383	0.864157	0.0294599	0.123106	0.0340909	0.276923	0.119048	6.36145	0.0303541
EGFR_ENST00000442591	293	0.122867	0.863481	0.0136519	0.142292	0.0158103	0.111111	0.140078	6.325	0.0138408
HIST1H3B	234	0.115385	0.863248	0.0213675	0.133663	0.0247525	0.185185	0.130435	6.3125	0.0218341
EZH2	467	0.0792291	0.862955	0.0578158	0.0918114	0.0669975	0.72973	0.0860465	6.29688	0.0613636
YAP1	124	0.0887097	0.862903	0.0483871	0.102804	0.0560748	0.545455	0.0973451	6.29412	0.0508475
C7orf72	102	0.0980392	0.862745	0.0392157	0.113636	0.0454545	0.4	0.108696	6.28571	0.0408163
FGFR2_ENST00000357555	435	0.103448	0.862069	0.0344828	0.12	0.04	0.333333	0.115385	6.25	0.0357143
FH	174	0.091954	0.862069	0.045977	0.106667	0.0533333	0.5	0.101266	6.25	0.0481928
FOXA1	362	0.132597	0.861878	0.00552486	0.153846	0.00641026	0.0416667	0.152866	6.24	0.00555556
GATA1_ENST00000376665	122	0.122951	0.860656	0.0163934	0.142857	0.0190476	0.133333	0.140187	6.17647	0.0166667
FGFR2_ENST00000369056	430	0.104651	0.860465	0.0348837	0.121622	0.0405405	0.333333	0.116883	6.16667	0.0361446
MDM2_ENST00000462284	157	0.101911	0.859873	0.0382166	0.118519	0.0444444	0.375	0.113475	6.13636	0.0397351
FBXW7_ENST00000393956	449	0.00890869	0.859688	0.131403	0.0103627	0.15285	14.75	0.00898876	6.12698	0.151282
PIK3C2G_ENST00000538779	504	0.0912698	0.859127	0.0496032	0.106236	0.0577367	0.543478	0.100437	6.09859	0.0521921
SMO	338	0.112426	0.857988	0.0295858	0.131034	0.0344828	0.263158	0.126667	6.04167	0.0304878
TROAP	190	0.115789	0.857895	0.0263158	0.134969	0.0306748	0.227273	0.130952	6.03704	0.027027
TP53_ENST00000545858	6559	0.00472633	0.857448	0.137826	0.00551209	0.16074	29.1613	0.00474877	6.01497	0.159859
KLF4	217	0.133641	0.857143	0.00921659	0.155914	0.0107527	0.0689655	0.154255	6	0.00930233
RUNX1_ENST00000486278	167	0.0479042	0.856287	0.0958084	0.0559441	0.111888	2	0.0503145	5.95833	0.10596
FGFR2_ENST00000457416	493	0.111562	0.855984	0.0324544	0.130332	0.0379147	0.290909	0.125571	5.94366	0.033543
KLHL5_ENST00000359687	152	0.118421	0.855263	0.0263158	0.138462	0.0307692	0.222222	0.134328	5.90909	0.027027
MYD88_ENST00000417037	131	0.0992366	0.854962	0.0458015	0.116071	0.0535714	0.461538	0.110169	5.89474	0.048
FGFR2_ENST00000351936	489	0.114519	0.854806	0.0306748	0.133971	0.0358852	0.267857	0.12933	5.88732	0.0316456
IRS2	413	0.138015	0.854722	0.00726392	0.161473	0.00849858	0.0526316	0.160112	5.88333	0.00731707
NXPE1	144	0.118056	0.854167	0.0277778	0.138211	0.0325203	0.235294	0.133858	5.85714	0.0285714
FAM55A	137	0.116788	0.854015	0.0291971	0.136752	0.034188	0.25	0.132231	5.85	0.0300752
CHEK1	137	0.10219	0.854015	0.0437956	0.119658	0.0512821	0.428571	0.113821	5.85	0.0458015
EZH2_ENST00000350995	410	0.0902439	0.853659	0.0560976	0.105714	0.0657143	0.621622	0.0991957	5.83333	0.0594315
OGT	191	0.125654	0.853403	0.0209424	0.147239	0.0245399	0.166667	0.143713	5.82143	0.0213904
RIT1	109	0.0917431	0.853211	0.0550459	0.107527	0.0645161	0.6	0.10101	5.8125	0.0582524
HNF1A_ENST00000543427	183	0.10929	0.852459	0.0382514	0.128205	0.0448718	0.35	0.122699	5.77778	0.0397727
CHD1L_ENST00000369258	122	0.106557	0.852459	0.0409836	0.125	0.0480769	0.384615	0.119266	5.77778	0.042735
PRKCI	162	0.0987654	0.851852	0.0493827	0.115942	0.057971	0.5	0.109589	5.75	0.0519481
POLG2	101	0.128713	0.851485	0.019802	0.151163	0.0232558	0.153846	0.147727	5.73333	0.020202
KLHL5_ENST00000381930	148	0.121622	0.851351	0.027027	0.142857	0.031746	0.222222	0.138462	5.72727	0.0277778
MAX_ENST00000284165	114	0.0263158	0.850877	0.122807	0.0309278	0.14433	4.66667	0.027027	5.70588	0.14
GNA11	288	0.135417	0.850694	0.0138889	0.159184	0.0163265	0.102564	0.156627	5.69767	0.0140845
MAX_ENST00000556979	107	0.0186916	0.850467	0.130841	0.021978	0.153846	7	0.0190476	5.6875	0.150538
PREPL	127	0.11811	0.850394	0.0314961	0.138889	0.037037	0.266667	0.133929	5.68421	0.0325203
TSHR	467	0.124197	0.850107	0.0256959	0.146096	0.0302267	0.206897	0.141809	5.67143	0.0263736
MED12_ENST00000333646	567	0.0917108	0.850088	0.0582011	0.107884	0.0684647	0.634615	0.100971	5.67059	0.0617978
TRAFD1	100	0.12	0.85	0.03	0.141176	0.0352941	0.25	0.136364	5.66667	0.0309278
TAF1	444	0.121622	0.849099	0.0292793	0.143236	0.0344828	0.240741	0.138462	5.62687	0.0301624
REL	177	0.112994	0.847458	0.039548	0.133333	0.0466667	0.35	0.127389	5.55556	0.0411765
NDUFS1	118	0.110169	0.847458	0.0423729	0.13	0.05	0.384615	0.12381	5.55556	0.0442478
TAF1_ENST00000276072	415	0.127711	0.845783	0.026506	0.150997	0.031339	0.207547	0.146409	5.48438	0.0272277
OGT_ENST00000373719	188	0.132979	0.845745	0.0212766	0.157233	0.0251572	0.16	0.153374	5.48276	0.0217391
ITGBL1	194	0.128866	0.845361	0.0257732	0.152439	0.0304878	0.2	0.147929	5.46667	0.026455
KLHL5	168	0.125	0.845238	0.0297619	0.147887	0.0352113	0.238095	0.142857	5.46154	0.0306748
TMTC3	155	0.116129	0.845161	0.0387097	0.137405	0.0458015	0.333333	0.131387	5.45833	0.0402685
IDH3B	103	0.135922	0.84466	0.0194175	0.16092	0.0229885	0.142857	0.157303	5.4375	0.019802
U2SURP	193	0.119171	0.84456	0.0362694	0.141104	0.0429448	0.304348	0.135294	5.43333	0.0376344
IGF1_ENST00000307046	122	0.122951	0.844262	0.0327869	0.145631	0.038835	0.266667	0.140187	5.42105	0.0338983
GNAS_ENST00000371100	742	0.132075	0.843666	0.0242588	0.15655	0.028754	0.183673	0.152174	5.39655	0.0248619
ENSG00000174501	274	0.131387	0.843066	0.0255474	0.155844	0.030303	0.194444	0.151261	5.37209	0.0262172
TCF12_ENST00000452095	140	0.0785714	0.842857	0.0785714	0.0932203	0.0932203	1	0.0852713	5.36364	0.0852713
STAT5B	248	0.112903	0.842742	0.0443548	0.133971	0.0526316	0.392857	0.127273	5.35897	0.0464135
KEAP1	652	0.0797546	0.842025	0.0782209	0.0947177	0.0928962	0.980769	0.0866667	5.3301	0.0848586
HNRNPK	120	0.125	0.841667	0.0333333	0.148515	0.039604	0.266667	0.142857	5.31579	0.0344828
ZNF711	221	0.104072	0.841629	0.0542986	0.123656	0.0645161	0.521739	0.116162	5.31429	0.0574163
XPO1	346	0.121387	0.84104	0.0375723	0.14433	0.0446735	0.309524	0.138158	5.29091	0.039039
U2AF2	132	0.151515	0.840909	0.00757576	0.18018	0.00900901	0.05	0.178571	5.28571	0.00763359
CCNE1	138	0.108696	0.84058	0.0507246	0.12931	0.0603448	0.466667	0.121951	5.27273	0.0534351
KMO	144	0.131944	0.840278	0.0277778	0.157025	0.0330579	0.210526	0.152	5.26087	0.0285714
SGIP1_ENST00000371039	175	0.114286	0.84	0.0457143	0.136054	0.0544218	0.4	0.129032	5.25	0.0479042
TP53_ENST00000455263	10059	0.011532	0.839547	0.148921	0.0137359	0.177383	12.9138	0.0116665	5.23234	0.17498
CXXC1	174	0.132184	0.83908	0.0287356	0.157534	0.0342466	0.217391	0.152318	5.21429	0.0295858
RET	1019	0.133464	0.839058	0.0274779	0.159064	0.0327485	0.205882	0.15402	5.21341	0.0282543
SMC1A	248	0.125	0.83871	0.0362903	0.149038	0.0432692	0.290323	0.142857	5.2	0.0376569
CHEK2_ENST00000382580	155	0.0580645	0.83871	0.103226	0.0692308	0.123077	1.77778	0.0616438	5.2	0.115108
GNE	136	0.139706	0.838235	0.0220588	0.166667	0.0263158	0.157895	0.162393	5.18182	0.0225564
NT5C2	136	0.139706	0.838235	0.0220588	0.166667	0.0263158	0.157895	0.162393	5.18182	0.0225564
CHD1L	173	0.121387	0.83815	0.0404624	0.144828	0.0482759	0.333333	0.138158	5.17857	0.0421687
PARN_ENST00000437198	105	0.104762	0.838095	0.0571429	0.125	0.0681818	0.545455	0.117021	5.17647	0.0606061
POTEM_ENST00000551509	142	0.140845	0.838028	0.0211268	0.168067	0.0252101	0.15	0.163934	5.17391	0.0215827
BRIP1	395	0.106329	0.837975	0.0556962	0.126888	0.0664653	0.52381	0.11898	5.17188	0.0589812
DENND4C	253	0.142292	0.837945	0.0197628	0.169811	0.0235849	0.138889	0.165899	5.17073	0.0201613
TRIM48	228	0.157895	0.837719	0.00438596	0.188482	0.0052356	0.0277778	0.1875	5.16216	0.00440529
TP53_ENST00000420246	9776	0.0126841	0.837152	0.150164	0.0151515	0.179374	11.8387	0.0128471	5.1407	0.176697
BRIP1_ENST00000259008	386	0.108808	0.836788	0.0544041	0.130031	0.0650155	0.5	0.122093	5.12698	0.0575342
EGFR_ENST00000344576	514	0.14786	0.836576	0.0155642	0.176744	0.0186047	0.105263	0.173516	5.11905	0.0158103
MANEA	104	0.0961538	0.836538	0.0673077	0.114943	0.0804598	0.7	0.106383	5.11765	0.0721649
ANKRD56	122	0.139344	0.836066	0.0245902	0.166667	0.0294118	0.176471	0.161905	5.1	0.0252101
PIAS2_ENST00000324794	122	0.139344	0.836066	0.0245902	0.166667	0.0294118	0.176471	0.161905	5.1	0.0252101
GNE_ENST00000396594	134	0.141791	0.835821	0.0223881	0.169643	0.0267857	0.157895	0.165217	5.09091	0.0229008
MAPK1	146	0.136986	0.835616	0.0273973	0.163934	0.0327869	0.2	0.15873	5.08333	0.028169
RAD50_ENST00000265335	383	0.0861619	0.835509	0.078329	0.103125	0.09375	0.909091	0.0942857	5.07937	0.0849858
TRIM48_ENST00000417545	231	0.155844	0.835498	0.00865801	0.186528	0.0103627	0.0555556	0.184615	5.07895	0.00873362
RAF1	279	0.125448	0.835125	0.0394265	0.150215	0.0472103	0.314286	0.143443	5.06522	0.0410448
N4BP2L2	103	0.135922	0.834951	0.0291262	0.162791	0.0348837	0.214286	0.157303	5.05882	0.03
SAG_ENST00000409110	109	0.137615	0.834862	0.0275229	0.164835	0.032967	0.2	0.159574	5.05556	0.0283019
TRIM23	109	0.12844	0.834862	0.0366972	0.153846	0.043956	0.285714	0.147368	5.05556	0.0380952
ZNF354B	109	0.12844	0.834862	0.0366972	0.153846	0.043956	0.285714	0.147368	5.05556	0.0380952
PARN	109	0.110092	0.834862	0.0550459	0.131868	0.0659341	0.5	0.123711	5.05556	0.0582524
CDC23	115	0.156522	0.834783	0.00869565	0.1875	0.0104167	0.0555556	0.185567	5.05263	0.00877193
CHEK2	242	0.0743802	0.834711	0.0909091	0.0891089	0.108911	1.22222	0.0803571	5.05	0.1
TCF12_ENST00000438423	139	0.0791367	0.834532	0.0863309	0.0948276	0.103448	1.09091	0.0859375	5.04348	0.0944882
BCL6	308	0.133117	0.834416	0.0324675	0.159533	0.0389105	0.243902	0.153558	5.03922	0.033557
MDM4	157	0.127389	0.834395	0.0382166	0.152672	0.0458015	0.3	0.145985	5.03846	0.0397351
TP53_ENST00000413465	7555	0.0108537	0.83415	0.154997	0.0130117	0.185814	14.2805	0.0109728	5.02953	0.183427
DIS3	313	0.111821	0.833866	0.0543131	0.1341	0.0651341	0.485714	0.125899	5.01923	0.0574324
TAF1_ENST00000449580	370	0.137838	0.832432	0.0297297	0.165584	0.0357143	0.215686	0.159875	4.96774	0.0306407
DDX17_ENST00000381633	143	0.125874	0.832168	0.041958	0.151261	0.0504202	0.333333	0.144	4.95833	0.0437956
MCMDC2	143	0.111888	0.832168	0.0559441	0.134454	0.0672269	0.5	0.125984	4.95833	0.0592593
MCMDC2_ENST00000422365	143	0.111888	0.832168	0.0559441	0.134454	0.0672269	0.5	0.125984	4.95833	0.0592593
C8orf45	137	0.0948905	0.832117	0.0729927	0.114035	0.0877193	0.769231	0.104839	4.95652	0.0787402
PHACTR2	131	0.137405	0.832061	0.0305344	0.165138	0.0366972	0.222222	0.159292	4.95455	0.0314961
USP8	238	0.121849	0.831933	0.0462185	0.146465	0.0555556	0.37931	0.138756	4.95	0.0484581
NOTCH4	785	0.119745	0.831847	0.0484076	0.143951	0.058193	0.404255	0.136035	4.94697	0.0508701
LARGE_ENST00000452586	107	0.168224	0.831776	0	0.202247	0	0	0.202247	4.94444	0
CYP39A1	101	0.118812	0.831683	0.049505	0.142857	0.0595238	0.416667	0.134831	4.94118	0.0520833
RBM25	196	0.137755	0.831633	0.0306122	0.165644	0.0368098	0.222222	0.159763	4.93939	0.0315789
BARD1	243	0.111111	0.831276	0.0576132	0.133663	0.0693069	0.518519	0.125	4.92683	0.0611354
TCF12	154	0.0779221	0.831169	0.0909091	0.09375	0.109375	1.16667	0.084507	4.92308	0.1
MPL	296	0.121622	0.831081	0.0472973	0.146341	0.0569106	0.388889	0.138462	4.92	0.0496454
FBXO11	195	0.138462	0.830769	0.0307692	0.166667	0.037037	0.222222	0.160714	4.90909	0.031746
PPHLN1_ENST00000432191	124	0.129032	0.830645	0.0403226	0.15534	0.0485437	0.3125	0.148148	4.90476	0.0420168
G3BP2	112	0.125	0.830357	0.0446429	0.150538	0.0537634	0.357143	0.142857	4.89474	0.046729
SAG	106	0.141509	0.830189	0.0283019	0.170455	0.0340909	0.2	0.164835	4.88889	0.0291262
BARD1_ENST00000260947	235	0.114894	0.829787	0.0553191	0.138462	0.0666667	0.481481	0.129808	4.875	0.0585586
ENPP4	135	0.140741	0.82963	0.0296296	0.169643	0.0357143	0.210526	0.163793	4.86957	0.0305344
RAF1_ENST00000442415	270	0.12963	0.82963	0.0407407	0.15625	0.0491071	0.314286	0.148936	4.86957	0.042471
RNF19A	176	0.147727	0.829545	0.0227273	0.178082	0.0273973	0.153846	0.173333	4.86667	0.0232558
ETV1	264	0.117424	0.829545	0.0530303	0.141553	0.0639269	0.451613	0.133047	4.86667	0.056
DICER1	808	0.111386	0.829208	0.0594059	0.134328	0.0716418	0.533333	0.125348	4.85507	0.0631579
NTRK2_ENST00000304053	228	0.140351	0.828947	0.0307018	0.169312	0.037037	0.21875	0.163265	4.84615	0.0316742
ZFP37_ENST00000553380	152	0.138158	0.828947	0.0328947	0.166667	0.0396825	0.238095	0.160305	4.84615	0.0340136
GTF2E1	111	0.144144	0.828829	0.027027	0.173913	0.0326087	0.1875	0.168421	4.84211	0.0277778
HNRNPA2B1	111	0.0990991	0.828829	0.0720721	0.119565	0.0869565	0.727273	0.11	4.84211	0.0776699
HNRNPA2B1_ENST00000354667	111	0.0990991	0.828829	0.0720721	0.119565	0.0869565	0.727273	0.11	4.84211	0.0776699
TGFBR2_ENST00000359013	397	0.0629723	0.828715	0.108312	0.0759878	0.130699	1.72	0.0672043	4.83824	0.121469
ZNF711_ENST00000373165	221	0.117647	0.828054	0.0542986	0.142077	0.0655738	0.461538	0.133333	4.81579	0.0574163
CCDC35	122	0.147541	0.827869	0.0245902	0.178218	0.029703	0.166667	0.173077	4.80952	0.0252101
CDKAL1	110	0.154545	0.827273	0.0181818	0.186813	0.021978	0.117647	0.182796	4.78947	0.0185185
SLC14A1_ENST00000436407	133	0.142857	0.827068	0.0300752	0.172727	0.0363636	0.210526	0.166667	4.78261	0.0310078
PIK3R3	156	0.0705128	0.826923	0.102564	0.0852713	0.124031	1.45455	0.0758621	4.77778	0.114286
NTRK2_ENST00000395882	179	0.145251	0.826816	0.027933	0.175676	0.0337838	0.192308	0.169935	4.77419	0.0287356
PKN2	173	0.104046	0.82659	0.0693642	0.125874	0.0839161	0.666667	0.116129	4.76667	0.0745342
AXL	467	0.149893	0.826552	0.0235546	0.181347	0.0284974	0.157143	0.176322	4.76543	0.0241228
RIOK3	121	0.165289	0.826446	0.00826446	0.2	0.01	0.05	0.19802	4.7619	0.00833333
AFP	121	0.14876	0.826446	0.0247934	0.18	0.03	0.166667	0.174757	4.7619	0.0254237
VWC2L	121	0.140496	0.826446	0.0330579	0.17	0.04	0.235294	0.163462	4.7619	0.034188
KPNA5	121	0.132231	0.826446	0.0413223	0.16	0.05	0.3125	0.152381	4.7619	0.0431034
ARHGAP11A	138	0.115942	0.826087	0.057971	0.140351	0.0701754	0.5	0.131148	4.75	0.0615385
TXNRD1_ENST00000525566	109	0.12844	0.825688	0.0458716	0.155556	0.0555556	0.357143	0.147368	4.73684	0.0480769
ZFP2	149	0.120805	0.825503	0.0536913	0.146341	0.0650407	0.444444	0.137405	4.73077	0.0567376
NONO	126	0.103175	0.825397	0.0714286	0.125	0.0865385	0.692308	0.115044	4.72727	0.0769231
BTNL3	143	0.167832	0.825175	0.00699301	0.20339	0.00847458	0.0416667	0.201681	4.72	0.00704225
KLK15	143	0.167832	0.825175	0.00699301	0.20339	0.00847458	0.0416667	0.201681	4.72	0.00704225
ADAM10	143	0.153846	0.825175	0.020979	0.186441	0.0254237	0.136364	0.181818	4.72	0.0214286
PTPRU_ENST00000323874	120	0.175	0.825	0	0.212121	0	0	0.212121	4.71429	0
SUFU	160	0.1375	0.825	0.0375	0.166667	0.0454545	0.272727	0.15942	4.71429	0.038961
KLHL7	120	0.125	0.825	0.05	0.151515	0.0606061	0.4	0.142857	4.71429	0.0526316
CPSF6	137	0.124088	0.824818	0.0510949	0.150442	0.0619469	0.411765	0.141667	4.70833	0.0538462
CPSF6_ENST00000435070	137	0.124088	0.824818	0.0510949	0.150442	0.0619469	0.411765	0.141667	4.70833	0.0538462
PIK3C2G	713	0.12202	0.824684	0.0532959	0.147959	0.0646259	0.436782	0.138978	4.704	0.0562963
MYC	308	0.159091	0.824675	0.0162338	0.192913	0.019685	0.102041	0.189189	4.7037	0.0165017
GALNTL5	131	0.129771	0.824427	0.0458015	0.157407	0.0555556	0.352941	0.149123	4.69565	0.048
KDM5A	541	0.101664	0.824399	0.0739372	0.123318	0.0896861	0.727273	0.113169	4.69474	0.0798403
KDM5A_ENST00000399788	541	0.101664	0.824399	0.0739372	0.123318	0.0896861	0.727273	0.113169	4.69474	0.0798403
MGAT4C_ENST00000393205	222	0.148649	0.824324	0.027027	0.180328	0.0327869	0.181818	0.174603	4.69231	0.0277778
MTOR	1126	0.133215	0.824156	0.0426288	0.161638	0.0517241	0.32	0.153689	4.68687	0.0445269
NTRK2_ENST00000376214	381	0.131234	0.824147	0.0446194	0.159236	0.0541401	0.34	0.151057	4.68657	0.0467033
SUZ12	199	0.0753769	0.824121	0.100503	0.0914634	0.121951	1.33333	0.0815217	4.68571	0.111732
MYC_ENST00000377970	324	0.160494	0.824074	0.0154321	0.194757	0.0187266	0.0961538	0.191176	4.68421	0.015674
PLEKHS1	108	0.138889	0.824074	0.037037	0.168539	0.0449438	0.266667	0.16129	4.68421	0.0384615
STAM2	108	0.12963	0.824074	0.0462963	0.157303	0.0561798	0.357143	0.148936	4.68421	0.0485437
RAD50	341	0.0909091	0.824047	0.085044	0.11032	0.103203	0.935484	0.1	4.68333	0.0929487
MCMDC2_ENST00000313616	125	0.12	0.824	0.056	0.145631	0.0679612	0.466667	0.136364	4.68182	0.059322
NTRK2	392	0.132653	0.82398	0.0433673	0.160991	0.0526316	0.326923	0.152941	4.68116	0.0453333
SOX2	142	0.147887	0.823944	0.028169	0.179487	0.034188	0.190476	0.173554	4.68	0.0289855
DDX17	159	0.132075	0.823899	0.0440252	0.160305	0.0534351	0.333333	0.152174	4.67857	0.0460526
CFHR3	159	0.119497	0.823899	0.0566038	0.145038	0.0687023	0.473684	0.135714	4.67857	0.06
GNAQ	295	0.125424	0.823729	0.0508475	0.152263	0.0617284	0.405405	0.143411	4.67308	0.0535714
PIK3C2G_ENST00000433979	703	0.119488	0.823613	0.056899	0.145078	0.0690846	0.47619	0.135703	4.66935	0.0603318
XRCC6	119	0.151261	0.823529	0.0252101	0.183673	0.0306122	0.166667	0.178218	4.66667	0.0258621
AGTPBP1_ENST00000376109	119	0.0840336	0.823529	0.092437	0.102041	0.112245	1.1	0.0917431	4.66667	0.101852
HDX	181	0.132597	0.823204	0.0441989	0.161074	0.0536913	0.333333	0.152866	4.65625	0.0462428
FGF3	147	0.14966	0.823129	0.0272109	0.181818	0.0330579	0.181818	0.176	4.65385	0.027972
NAA35	113	0.106195	0.823009	0.0707965	0.129032	0.0860215	0.666667	0.118812	4.65	0.0761905
TRDN	226	0.0884956	0.823009	0.0884956	0.107527	0.107527	1	0.0970874	4.65	0.0970874
YES1	175	0.0971429	0.822857	0.08	0.118056	0.0972222	0.823529	0.107595	4.64516	0.0869565
DDX3X	282	0.0992908	0.822695	0.0780142	0.12069	0.0948276	0.785714	0.110236	4.64	0.0846154
PSPC1	124	0.112903	0.822581	0.0645161	0.137255	0.0784314	0.571429	0.127273	4.63636	0.0689655
MED12_ENST00000374080	839	0.121573	0.822408	0.0560191	0.147826	0.0681159	0.460784	0.138399	4.63087	0.0593434
SUPT16H	208	0.139423	0.822115	0.0384615	0.169591	0.0467836	0.275862	0.162011	4.62162	0.04
MMP13	163	0.165644	0.822086	0.0122699	0.201493	0.0149254	0.0740741	0.198529	4.62069	0.0124224
ALK	1096	0.141423	0.82208	0.0364964	0.172031	0.0443951	0.258065	0.164718	4.62051	0.0378788
TMEM161B	118	0.152542	0.822034	0.0254237	0.185567	0.0309278	0.166667	0.18	4.61905	0.026087
PLCG1	500	0.15	0.822	0.028	0.182482	0.0340633	0.186667	0.176471	4.61798	0.0288066
TJAP1_ENST00000372445	101	0.168317	0.821782	0.00990099	0.204819	0.0120482	0.0588235	0.202381	4.61111	0.01
ERLEC1	101	0.158416	0.821782	0.019802	0.192771	0.0240964	0.125	0.188235	4.61111	0.020202
MAPK9_ENST00000452135	101	0.148515	0.821782	0.029703	0.180723	0.0361446	0.2	0.174419	4.61111	0.0306122
NBN	230	0.108696	0.821739	0.0695652	0.132275	0.0846561	0.64	0.121951	4.60976	0.0747664
CENPI	157	0.165605	0.821656	0.0127389	0.20155	0.0155039	0.0769231	0.198473	4.60714	0.0129032
PIK3CB	353	0.113314	0.82153	0.0651558	0.137931	0.0793103	0.575	0.127796	4.60317	0.069697
TJAP1	112	0.169643	0.821429	0.00892857	0.206522	0.0108696	0.0526316	0.204301	4.6	0.00900901
EXOC1	196	0.117347	0.821429	0.0612245	0.142857	0.0745342	0.521739	0.132948	4.6	0.0652174
MAX	140	0.0571429	0.821429	0.121429	0.0695652	0.147826	2.125	0.0606061	4.6	0.138211
ZNF626_ENST00000392298	341	0.134897	0.821114	0.0439883	0.164286	0.0535714	0.326087	0.155932	4.59016	0.0460123
FANCC_ENST00000289081	173	0.138728	0.820809	0.0404624	0.169014	0.0492958	0.291667	0.161074	4.58065	0.0421687
HOMEZ_ENST00000357460	106	0.141509	0.820755	0.0377358	0.172414	0.045977	0.266667	0.164835	4.57895	0.0392157
RAD51B_ENST00000487270	106	0.141509	0.820755	0.0377358	0.172414	0.045977	0.266667	0.164835	4.57895	0.0392157
PDS5A	251	0.139442	0.820717	0.0398406	0.169903	0.0485437	0.285714	0.162037	4.57778	0.0414938
BICC1_ENST00000263103	145	0.137931	0.82069	0.0413793	0.168067	0.0504202	0.3	0.16	4.57692	0.0431655
PITRM1_ENST00000451104	184	0.157609	0.820652	0.0217391	0.192053	0.0264901	0.137931	0.187097	4.57576	0.0222222
MAP9	167	0.143713	0.820359	0.0359281	0.175182	0.0437956	0.25	0.167832	4.56667	0.0372671
TBX3	462	0.116883	0.820346	0.0627706	0.14248	0.0765172	0.537037	0.132353	4.56627	0.0669746
ETV6	306	0.114379	0.820261	0.0653595	0.139442	0.0796813	0.571429	0.129151	4.56364	0.0699301
CASD1	178	0.157303	0.820225	0.0224719	0.191781	0.0273973	0.142857	0.186667	4.5625	0.0229885
MAGEB3	139	0.165468	0.820144	0.0143885	0.201754	0.0175439	0.0869565	0.198276	4.56	0.0145985
THOC2	328	0.146341	0.820122	0.0335366	0.178439	0.0408922	0.229167	0.171429	4.55932	0.0347003
POLE	984	0.140244	0.820122	0.0396341	0.171004	0.0483271	0.282609	0.163121	4.55932	0.0412698
TP53	12532	0.0110118	0.820061	0.168928	0.013428	0.205994	15.3406	0.0111344	4.55743	0.203265
ABLIM1_ENST00000392952	100	0.13	0.82	0.05	0.158537	0.0609756	0.384615	0.149425	4.55556	0.0526316
LOC133308	100	0.13	0.82	0.05	0.158537	0.0609756	0.384615	0.149425	4.55556	0.0526316
NHEDC2	100	0.13	0.82	0.05	0.158537	0.0609756	0.384615	0.149425	4.55556	0.0526316
RIPK2	111	0.135135	0.81982	0.045045	0.164835	0.0549451	0.333333	0.15625	4.55	0.0471698
AGAP6	111	0.117117	0.81982	0.0630631	0.142857	0.0769231	0.538462	0.132653	4.55	0.0673077
SLC14A1	122	0.147541	0.819672	0.0327869	0.18	0.04	0.222222	0.173077	4.54545	0.0338983
PDE4D_ENST00000502484	133	0.135338	0.819549	0.0451128	0.165138	0.0550459	0.333333	0.156522	4.54167	0.0472441
ERCC5	349	0.143266	0.819484	0.0372493	0.174825	0.0454545	0.26	0.167224	4.53968	0.0386905
DZANK1_ENST00000329494	144	0.138889	0.819444	0.0416667	0.169492	0.0508475	0.3	0.16129	4.53846	0.0434783
ACCN5	155	0.16129	0.819355	0.0193548	0.19685	0.023622	0.12	0.192308	4.53571	0.0197368
LUZP4	116	0.0948276	0.818966	0.0862069	0.115789	0.105263	0.909091	0.104762	4.52381	0.0943396
NOX5_ENST00000388866	138	0.152174	0.818841	0.0289855	0.185841	0.0353982	0.190476	0.179487	4.52	0.0298507
CCND2	149	0.14094	0.818792	0.0402685	0.172131	0.0491803	0.285714	0.164062	4.51852	0.041958
FRYL_ENST00000537810	193	0.139896	0.818653	0.0414508	0.170886	0.0506329	0.296296	0.162651	4.51429	0.0432432
RICTOR_ENST00000296782	501	0.11976	0.818363	0.0618762	0.146341	0.0756098	0.516667	0.136054	4.50549	0.0659574
DNMT3A	842	0.103325	0.81829	0.0783848	0.12627	0.095791	0.758621	0.115232	4.50327	0.0850515
PIP5K1C_ENST00000537021	121	0.181818	0.818182	0	0.222222	0	0	0.222222	4.5	0
ZNF649	132	0.174242	0.818182	0.00757576	0.212963	0.00925926	0.0434783	0.211009	4.5	0.00763359
TBC1D2B_ENST00000300584	198	0.166667	0.818182	0.0151515	0.203704	0.0185185	0.0909091	0.2	4.5	0.0153846
BIRC2	110	0.145455	0.818182	0.0363636	0.177778	0.0444444	0.25	0.170213	4.5	0.0377358
MARCH7	121	0.115702	0.818182	0.0661157	0.141414	0.0808081	0.571429	0.130841	4.5	0.0707965
MYCL1_ENST00000397332	110	0.109091	0.818182	0.0727273	0.133333	0.0888889	0.666667	0.122449	4.5	0.0784314
TP53_ENST00000269305	11003	0.0106335	0.81805	0.171317	0.0129986	0.209421	16.1111	0.0107477	4.496	0.206734
BRD4_ENST00000263377	489	0.149284	0.817996	0.0327198	0.1825	0.04	0.219178	0.175481	4.49438	0.0338266
PAX5	280	0.164286	0.817857	0.0178571	0.200873	0.0218341	0.108696	0.196581	4.4902	0.0181818
RANBP6	203	0.172414	0.817734	0.00985222	0.210843	0.0120482	0.0571429	0.208333	4.48649	0.00995025
CEP290_ENST00000309041	203	0.0935961	0.817734	0.08867	0.114458	0.108434	0.947368	0.103261	4.48649	0.0972973
FBXW7_ENST00000534231	1004	0.0278884	0.817729	0.154382	0.0341048	0.188794	5.53571	0.0286885	4.48634	0.182568
PAK2_ENST00000327134	148	0.162162	0.817568	0.0202703	0.198347	0.0247934	0.125	0.193548	4.48148	0.0206897
TBRG4	137	0.153285	0.817518	0.0291971	0.1875	0.0357143	0.190476	0.181034	4.48	0.0300752
CCDC9	126	0.174603	0.81746	0.00793651	0.213592	0.00970874	0.0454545	0.211538	4.47826	0.008
USO1	126	0.126984	0.81746	0.0555556	0.15534	0.0679612	0.4375	0.145455	4.47826	0.0588235
SERPIND1	115	0.173913	0.817391	0.00869565	0.212766	0.0106383	0.05	0.210526	4.47619	0.00877193
SERPIND1_ENST00000215727	115	0.173913	0.817391	0.00869565	0.212766	0.0106383	0.05	0.210526	4.47619	0.00877193
COIL	115	0.156522	0.817391	0.026087	0.191489	0.0319149	0.166667	0.185567	4.47619	0.0267857
CAPS2_ENST00000409445	115	0.113043	0.817391	0.0695652	0.138298	0.0851064	0.615385	0.127451	4.47619	0.0747664
HOMEZ	104	0.144231	0.817308	0.0384615	0.176471	0.0470588	0.266667	0.168539	4.47368	0.04
MSL3_ENST00000398527	104	0.134615	0.817308	0.0480769	0.164706	0.0588235	0.357143	0.155556	4.47368	0.0505051
CXorf30_ENST00000378657	153	0.130719	0.816993	0.0522876	0.16	0.064	0.4	0.150376	4.46429	0.0551724
ETV1_ENST00000403527	240	0.129167	0.816667	0.0541667	0.158163	0.0663265	0.419355	0.148325	4.45455	0.0572687
C7orf63	218	0.155963	0.816514	0.0275229	0.191011	0.0337079	0.176471	0.184783	4.45	0.0283019
SSX2IP_ENST00000370612	109	0.119266	0.816514	0.0642202	0.146067	0.0786517	0.538462	0.135417	4.45	0.0686275
SLITRK6	354	0.138418	0.816384	0.0451977	0.16955	0.0553633	0.326531	0.160656	4.44615	0.0473373
DNAH2_ENST00000570791	147	0.122449	0.816327	0.0612245	0.15	0.075	0.5	0.139535	4.44444	0.0652174
AXL_ENST00000301178	424	0.158019	0.816038	0.0259434	0.193642	0.0317919	0.164179	0.187675	4.4359	0.0266344
FBXO11_ENST00000403359	201	0.134328	0.81592	0.0497512	0.164634	0.0609756	0.37037	0.155172	4.43243	0.052356
FGF14_ENST00000376143	114	0.175439	0.815789	0.00877193	0.215054	0.0107527	0.05	0.212766	4.42857	0.00884956
STRN3_ENST00000357479	114	0.140351	0.815789	0.0438596	0.172043	0.0537634	0.3125	0.163265	4.42857	0.0458716
CXorf30	152	0.138158	0.815789	0.0460526	0.169355	0.0564516	0.333333	0.160305	4.42857	0.0482759
ZFP36L2	190	0.115789	0.815789	0.0684211	0.141935	0.083871	0.590909	0.130952	4.42857	0.0734463
NMT2	103	0.126214	0.815534	0.0582524	0.154762	0.0714286	0.461538	0.144444	4.42105	0.0618557
EIF3A	298	0.154362	0.815436	0.0302013	0.1893	0.037037	0.195652	0.18254	4.41818	0.0311419
C12orf26	157	0.11465	0.815287	0.0700637	0.140625	0.0859375	0.611111	0.129496	4.41379	0.0753425
IRF4_ENST00000380956	330	0.130303	0.815152	0.0545455	0.159851	0.0669145	0.418605	0.149826	4.40984	0.0576923
KAT8	119	0.168067	0.815126	0.0168067	0.206186	0.0206186	0.1	0.20202	4.40909	0.017094
AHNAK2	119	0.151261	0.815126	0.0336134	0.185567	0.0412371	0.222222	0.178218	4.40909	0.0347826
LUM	119	0.151261	0.815126	0.0336134	0.185567	0.0412371	0.222222	0.178218	4.40909	0.0347826
TTC3_ENST00000540756	119	0.142857	0.815126	0.0420168	0.175258	0.0515464	0.294118	0.166667	4.40909	0.0438596
ANXA10	119	0.12605	0.815126	0.0588235	0.154639	0.0721649	0.466667	0.144231	4.40909	0.0625
POTEM	146	0.164384	0.815068	0.0205479	0.201681	0.0252101	0.125	0.196721	4.40741	0.020979
MYO9A_ENST00000424560	481	0.126819	0.814969	0.0582121	0.155612	0.0714286	0.459016	0.145238	4.40449	0.0618102
PPHLN1_ENST00000395568	135	0.155556	0.814815	0.0296296	0.190909	0.0363636	0.190476	0.184211	4.4	0.0305344
FBXO34	135	0.148148	0.814815	0.037037	0.181818	0.0454545	0.25	0.173913	4.4	0.0384615
CCDC68	108	0.138889	0.814815	0.0462963	0.170455	0.0568182	0.333333	0.16129	4.4	0.0485437
PA2G4	108	0.138889	0.814815	0.0462963	0.170455	0.0568182	0.333333	0.16129	4.4	0.0485437
LRP12	259	0.142857	0.814672	0.042471	0.175355	0.0521327	0.297297	0.166667	4.39583	0.0443548
SMC3	232	0.12931	0.814655	0.0560345	0.15873	0.0687831	0.433333	0.148515	4.39535	0.0593607
KIAA1107	178	0.140449	0.814607	0.0449438	0.172414	0.0551724	0.32	0.163399	4.39394	0.0470588
PGCP	151	0.145695	0.81457	0.0397351	0.178862	0.0487805	0.272727	0.170543	4.39286	0.0413793
CPSF6_ENST00000266679	124	0.137097	0.814516	0.0483871	0.168317	0.0594059	0.352941	0.158879	4.3913	0.0508475
ZC3H14	167	0.137725	0.814371	0.0479042	0.169118	0.0588235	0.347826	0.159722	4.3871	0.0503145
RICTOR	506	0.120553	0.814229	0.0652174	0.148058	0.0800971	0.540984	0.137079	4.38298	0.0697674
RASGEF1B	113	0.150442	0.814159	0.0353982	0.184783	0.0434783	0.235294	0.177083	4.38095	0.0366972
CDC16	113	0.141593	0.814159	0.0442478	0.173913	0.0543478	0.3125	0.164948	4.38095	0.0462963
ERG_ENST00000288319	269	0.141264	0.814126	0.0446097	0.173516	0.0547945	0.315789	0.164502	4.38	0.0466926
ZNF540	129	0.162791	0.813953	0.0232558	0.2	0.0285714	0.142857	0.194444	4.375	0.0238095
RTN3	172	0.133721	0.813953	0.0523256	0.164286	0.0642857	0.391304	0.154362	4.375	0.0552147
PIK3R2	274	0.160584	0.813869	0.0255474	0.197309	0.0313901	0.159091	0.191304	4.37255	0.0262172
OR4P4	161	0.167702	0.813665	0.0186335	0.206107	0.0229008	0.111111	0.201493	4.36667	0.0189873
MEF2B	177	0.163842	0.813559	0.0225989	0.201389	0.0277778	0.137931	0.195946	4.36364	0.0231214
XPNPEP3	118	0.161017	0.813559	0.0254237	0.197917	0.03125	0.157895	0.191919	4.36364	0.026087
IFLTD1	118	0.152542	0.813559	0.0338983	0.1875	0.0416667	0.222222	0.18	4.36364	0.0350877
POT1_ENST00000357628	252	0.111111	0.813492	0.0753968	0.136585	0.0926829	0.678571	0.125	4.3617	0.0815451
OR8D4	134	0.156716	0.813433	0.0298507	0.192661	0.0366972	0.190476	0.185841	4.36	0.0307692
EED	134	0.104478	0.813433	0.0820896	0.12844	0.100917	0.785714	0.116667	4.36	0.0894309
ULK2_ENST00000361658	182	0.142857	0.813187	0.043956	0.175676	0.0540541	0.307692	0.166667	4.35294	0.045977
RINL	107	0.17757	0.813084	0.00934579	0.218391	0.0114943	0.0526316	0.215909	4.35	0.00943396
RAD51B	107	0.149533	0.813084	0.0373832	0.183908	0.045977	0.25	0.175824	4.35	0.038835
ZNF479	321	0.143302	0.813084	0.0436137	0.176245	0.0536398	0.304348	0.167273	4.35	0.0456026
GADL1	107	0.140187	0.813084	0.046729	0.172414	0.0574713	0.333333	0.163043	4.35	0.0490196
TRIM23_ENST00000381018	107	0.140187	0.813084	0.046729	0.172414	0.0574713	0.333333	0.163043	4.35	0.0490196
DEPDC1	123	0.138211	0.813008	0.0487805	0.17	0.06	0.352941	0.160377	4.34783	0.0512821
SLC2A13_ENST00000280871	139	0.151079	0.81295	0.0359712	0.185841	0.0442478	0.238095	0.177966	4.34615	0.0373134
PIK3C3	294	0.12585	0.812925	0.0612245	0.154812	0.0753138	0.486486	0.143969	4.34545	0.0652174
KIAA1383	203	0.152709	0.812808	0.0344828	0.187879	0.0424242	0.225806	0.180233	4.34211	0.0357143
KIAA1383_ENST00000418460	203	0.152709	0.812808	0.0344828	0.187879	0.0424242	0.225806	0.180233	4.34211	0.0357143
THOC2_ENST00000245838	347	0.15562	0.81268	0.0317003	0.191489	0.0390071	0.203704	0.1843	4.33846	0.0327381
JAK1	523	0.10325	0.81262	0.08413	0.127059	0.103529	0.814815	0.115139	4.33673	0.091858
ERBB4	1179	0.112807	0.812553	0.0746395	0.138831	0.091858	0.661654	0.127151	4.33484	0.0806599
AXIN2	368	0.138587	0.8125	0.048913	0.170569	0.0602007	0.352941	0.160883	4.33333	0.0514286
USO1_ENST00000538159	128	0.117188	0.8125	0.0703125	0.144231	0.0865385	0.6	0.132743	4.33333	0.0756303
BIRC3	181	0.0939227	0.812155	0.0939227	0.115646	0.115646	1	0.103659	4.32353	0.103659
COL5A2	463	0.159827	0.812095	0.0280778	0.196809	0.0345745	0.175676	0.190231	4.32184	0.0288889
SNAP91_ENST00000439399	298	0.151007	0.812081	0.0369128	0.18595	0.0454545	0.244444	0.177866	4.32143	0.0383275
HHIP	266	0.146617	0.81203	0.0413534	0.180556	0.0509259	0.282051	0.171806	4.32	0.0431373
CAPRIN1_ENST00000389645	133	0.120301	0.81203	0.0676692	0.148148	0.0833333	0.5625	0.136752	4.32	0.0725806
PDE4D_ENST00000503258	117	0.136752	0.811966	0.0512821	0.168421	0.0631579	0.375	0.158416	4.31818	0.0540541
PDE1A_ENST00000410103	218	0.12844	0.811927	0.059633	0.158192	0.0734463	0.464286	0.147368	4.31707	0.0634146
BTN2A3	101	0.178218	0.811881	0.00990099	0.219512	0.0121951	0.0555556	0.216867	4.31579	0.01
PLEKHA5_ENST00000309364	101	0.168317	0.811881	0.019802	0.207317	0.0243902	0.117647	0.202381	4.31579	0.020202
NFX1_ENST00000318524	101	0.158416	0.811881	0.029703	0.195122	0.0365854	0.1875	0.188235	4.31579	0.0306122
EPHA5	887	0.128523	0.811725	0.059752	0.158333	0.0736111	0.464912	0.147477	4.31138	0.0635492
KDM1B	122	0.163934	0.811475	0.0245902	0.20202	0.030303	0.15	0.196078	4.30435	0.0252101
PDGFRA	684	0.146199	0.811404	0.0423977	0.18018	0.0522523	0.29	0.171233	4.30233	0.0442748
SOX17	334	0.152695	0.811377	0.0359281	0.188192	0.0442804	0.235294	0.180212	4.30159	0.0372671
METTL3	106	0.160377	0.811321	0.0283019	0.197674	0.0348837	0.176471	0.191011	4.3	0.0291262
KIAA1772	159	0.144654	0.811321	0.0440252	0.178295	0.0542636	0.304348	0.169118	4.3	0.0460526
SNAP91	302	0.152318	0.811258	0.0364238	0.187755	0.044898	0.23913	0.179688	4.29825	0.0378007
CEP85	127	0.149606	0.811024	0.0393701	0.184466	0.0485437	0.263158	0.175926	4.29167	0.0409836
LIG4	201	0.144279	0.810945	0.0447761	0.177914	0.0552147	0.310345	0.168605	4.28947	0.046875
DKFZP564O0823	111	0.171171	0.810811	0.018018	0.211111	0.0222222	0.105263	0.206522	4.28571	0.0183486
ARAF	259	0.150579	0.810811	0.03861	0.185714	0.047619	0.25641	0.177273	4.28571	0.0401606
CYP4V2	111	0.135135	0.810811	0.0540541	0.166667	0.0666667	0.4	0.15625	4.28571	0.0571429
CDC40	111	0.126126	0.810811	0.0630631	0.155556	0.0777778	0.5	0.14433	4.28571	0.0673077
RDX	132	0.136364	0.810606	0.0530303	0.168224	0.0654206	0.388889	0.157895	4.28	0.056
RPTOR_ENST00000537330	132	0.128788	0.810606	0.0606061	0.158879	0.0747664	0.470588	0.147826	4.28	0.0645161
KDM1B_ENST00000388870	116	0.163793	0.810345	0.0258621	0.202128	0.0319149	0.157895	0.195876	4.27273	0.0265487
RBMX	116	0.155172	0.810345	0.0344828	0.191489	0.0425532	0.222222	0.183673	4.27273	0.0357143
GPR107	116	0.137931	0.810345	0.0517241	0.170213	0.0638298	0.375	0.16	4.27273	0.0545455
SOCS1	174	0.126437	0.810345	0.0632184	0.156028	0.0780142	0.5	0.144737	4.27273	0.0674847
KCNJ16	137	0.175182	0.810219	0.0145985	0.216216	0.018018	0.0833333	0.212389	4.26923	0.0148148
RGS12_ENST00000338806	158	0.177215	0.810127	0.0126582	0.21875	0.015625	0.0714286	0.215385	4.26667	0.0128205
SPOCK3	237	0.135021	0.810127	0.0548523	0.166667	0.0677083	0.40625	0.156098	4.26667	0.0580357
MGAT4C	258	0.151163	0.810078	0.0387597	0.186603	0.0478469	0.25641	0.178082	4.26531	0.0403226
FIG4	179	0.139665	0.810056	0.0502793	0.172414	0.062069	0.36	0.162338	4.26471	0.0529412
C11orf80	100	0.17	0.81	0.02	0.209877	0.0246914	0.117647	0.204819	4.26316	0.0204082
SULT1B1	100	0.17	0.81	0.02	0.209877	0.0246914	0.117647	0.204819	4.26316	0.0204082
DNAJC21_ENST00000303525	100	0.12	0.81	0.07	0.148148	0.0864198	0.583333	0.136364	4.26316	0.0752688
LRRD1	100	0.08	0.81	0.11	0.0987654	0.135802	1.375	0.0869565	4.26316	0.123596
PTPRD	1521	0.139382	0.809993	0.0506246	0.172078	0.0625	0.363208	0.161956	4.26298	0.0533241
TRPM7	321	0.149533	0.809969	0.0404984	0.184615	0.05	0.270833	0.175824	4.2623	0.0422078
HNF4G_ENST00000396423	221	0.140271	0.809955	0.0497738	0.173184	0.0614525	0.354839	0.163158	4.2619	0.052381
MET	663	0.135747	0.809955	0.0542986	0.167598	0.0670391	0.4	0.157068	4.2619	0.0574163
IFT81_ENST00000242591	121	0.140496	0.809917	0.0495868	0.173469	0.0612245	0.352941	0.163462	4.26087	0.0521739
KAT7	142	0.140845	0.809859	0.0492958	0.173913	0.0608696	0.35	0.163934	4.25926	0.0518519
SHQ1	142	0.0985915	0.809859	0.0915493	0.121739	0.113043	0.928571	0.109375	4.25926	0.100775
XRN1	305	0.114754	0.809836	0.0754098	0.1417	0.0931174	0.657143	0.12963	4.25862	0.0815603
TCF3_ENST00000344749	205	0.136585	0.809756	0.0536585	0.168675	0.0662651	0.392857	0.158192	4.25641	0.056701
POT1	268	0.108209	0.809701	0.0820896	0.133641	0.101382	0.758621	0.121339	4.2549	0.0894309
TGFBR2	436	0.0665138	0.809633	0.123853	0.082153	0.152975	1.86207	0.0712531	4.25301	0.141361
MLXIPL	231	0.17316	0.809524	0.017316	0.213904	0.0213904	0.1	0.209424	4.25	0.0176211
DEPDC1_ENST00000456315	168	0.142857	0.809524	0.047619	0.176471	0.0588235	0.333333	0.166667	4.25	0.05
CSF3R_ENST00000373104	257	0.159533	0.809339	0.0311284	0.197115	0.0384615	0.195122	0.189815	4.2449	0.0321285
C7orf63_ENST00000389297	215	0.162791	0.809302	0.027907	0.201149	0.0344828	0.171429	0.194444	4.2439	0.0287081
C17orf57	194	0.159794	0.809278	0.0309278	0.197452	0.0382166	0.193548	0.190184	4.24324	0.0319149
TRPM6_ENST00000361255	173	0.156069	0.809249	0.0346821	0.192857	0.0428571	0.222222	0.184932	4.24242	0.0359281
RINL_ENST00000591812	110	0.163636	0.809091	0.0272727	0.202247	0.0337079	0.166667	0.195652	4.2381	0.0280374
PTGES3L-AARSD1	110	0.154545	0.809091	0.0363636	0.191011	0.0449438	0.235294	0.182796	4.2381	0.0377358
OLFM3_ENST00000359814	110	0.136364	0.809091	0.0545455	0.168539	0.0674157	0.4	0.157895	4.2381	0.0576923
RAPGEF2	309	0.15534	0.809061	0.0355987	0.192	0.044	0.229167	0.183908	4.23729	0.0369128
USP53	178	0.134831	0.808989	0.0561798	0.166667	0.0694444	0.416667	0.155844	4.23529	0.0595238
PTPRD_ENST00000355233	1141	0.134093	0.80894	0.0569676	0.165764	0.0704225	0.424837	0.154858	4.23394	0.0604089
BRCA1_ENST00000471181	612	0.112745	0.808824	0.0784314	0.139394	0.0969697	0.695652	0.127072	4.23077	0.0851064
GOPC	115	0.156522	0.808696	0.0347826	0.193548	0.0430108	0.222222	0.185567	4.22727	0.036036
KIF2A_ENST00000407818	115	0.13913	0.808696	0.0521739	0.172043	0.0645161	0.375	0.161616	4.22727	0.0550459
GPSM2	115	0.113043	0.808696	0.0782609	0.139785	0.0967742	0.692308	0.127451	4.22727	0.0849057
PTPRD_ENST00000381196	1487	0.140551	0.808339	0.0511096	0.173877	0.063228	0.363636	0.163537	4.21754	0.0538625
ABAT	120	0.175	0.808333	0.0166667	0.216495	0.0206186	0.0952381	0.212121	4.21739	0.0169492
ZNF793_ENST00000445217	120	0.166667	0.808333	0.025	0.206186	0.0309278	0.15	0.2	4.21739	0.025641
FAM178A	120	0.158333	0.808333	0.0333333	0.195876	0.0412371	0.210526	0.188119	4.21739	0.0344828
BRD4	266	0.157895	0.808271	0.0338346	0.195349	0.0418605	0.214286	0.1875	4.21569	0.0350195
PTPRD_ENST00000346816	1079	0.133457	0.808156	0.0583874	0.165138	0.0722477	0.4375	0.154011	4.21256	0.0620079
C6orf103	172	0.156977	0.80814	0.0348837	0.194245	0.0431655	0.222222	0.186207	4.21212	0.0361446
KIAA1107_ENST00000409154	172	0.139535	0.80814	0.0523256	0.172662	0.0647482	0.375	0.162162	4.21212	0.0552147
MTBP	172	0.133721	0.80814	0.0581395	0.165468	0.0719424	0.434783	0.154362	4.21212	0.0617284
PDE1A	224	0.133929	0.808036	0.0580357	0.165746	0.0718232	0.433333	0.154639	4.2093	0.0616114
NHLRC2	125	0.136	0.808	0.056	0.168317	0.0693069	0.411765	0.157407	4.20833	0.059322
AGXT2L1	151	0.172185	0.807947	0.0198675	0.213115	0.0245902	0.115385	0.208	4.2069	0.0202703
PAK1_ENST00000278568	151	0.13245	0.807947	0.0596026	0.163934	0.0737705	0.45	0.152672	4.2069	0.0633803
MIS18BP1	203	0.157635	0.807882	0.0344828	0.195122	0.0426829	0.21875	0.187135	4.20513	0.0357143
BIVM	104	0.163462	0.807692	0.0288462	0.202381	0.0357143	0.176471	0.195402	4.2	0.029703
HPS5	182	0.137363	0.807692	0.0549451	0.170068	0.0680272	0.4	0.159236	4.2	0.0581395
FGFR1_ENST00000341462	343	0.163265	0.80758	0.0291545	0.202166	0.0361011	0.178571	0.195122	4.19697	0.03003
TBC1D2B	187	0.176471	0.807487	0.0160428	0.218543	0.0198675	0.0909091	0.214286	4.19444	0.0163043
CCT6A	109	0.183486	0.807339	0.00917431	0.227273	0.0113636	0.05	0.224719	4.19048	0.00925926
VTCN1	109	0.174312	0.807339	0.0183486	0.215909	0.0227273	0.105263	0.211111	4.19048	0.0186916
SPTLC2	109	0.146789	0.807339	0.0458716	0.181818	0.0568182	0.3125	0.172043	4.19048	0.0480769
FAM161A	140	0.121429	0.807143	0.0714286	0.150442	0.0884956	0.588235	0.138211	4.18519	0.0769231
CD79B	140	0.114286	0.807143	0.0785714	0.141593	0.0973451	0.6875	0.129032	4.18519	0.0852713
FDPS	114	0.184211	0.807018	0.00877193	0.228261	0.0108696	0.047619	0.225806	4.18182	0.00884956
FBLN1_ENST00000348697	171	0.157895	0.807018	0.0350877	0.195652	0.0434783	0.222222	0.1875	4.18182	0.0363636
ABCD3	114	0.149123	0.807018	0.0438596	0.184783	0.0543478	0.294118	0.175258	4.18182	0.0458716
FMO5	114	0.149123	0.807018	0.0438596	0.184783	0.0543478	0.294118	0.175258	4.18182	0.0458716
NFKBIE	114	0.140351	0.807018	0.0526316	0.173913	0.0652174	0.375	0.163265	4.18182	0.0555556
ERBB4_ENST00000402597	1093	0.116194	0.806953	0.0768527	0.143991	0.0952381	0.661417	0.13147	4.18009	0.0832507
ZNF721	295	0.166102	0.80678	0.0271186	0.205882	0.0336134	0.163265	0.199187	4.17544	0.0278746
MTO1	119	0.151261	0.806723	0.0420168	0.1875	0.0520833	0.277778	0.178218	4.17391	0.0438596
GFPT1	124	0.16129	0.806452	0.0322581	0.2	0.04	0.2	0.192308	4.16667	0.0333333
EPHA3	904	0.121681	0.806416	0.0719027	0.150892	0.0891632	0.590909	0.138539	4.16571	0.0774732
STAT1	191	0.157068	0.806283	0.0366492	0.194805	0.0454545	0.233333	0.186335	4.16216	0.0380435
PAK1	160	0.1375	0.80625	0.05625	0.170543	0.0697674	0.409091	0.15942	4.16129	0.0596026
FAM161A_ENST00000404929	160	0.125	0.80625	0.06875	0.155039	0.0852713	0.55	0.142857	4.16129	0.0738255
FLT1_ENST00000541932	418	0.148325	0.80622	0.0454545	0.183976	0.0563798	0.306452	0.174157	4.16049	0.047619
AR	717	0.143654	0.806137	0.0502092	0.178201	0.0622837	0.349515	0.167752	4.15827	0.0528634
SLC4A7	232	0.137931	0.806034	0.0560345	0.171123	0.0695187	0.40625	0.16	4.15556	0.0593607
WBP11	134	0.156716	0.80597	0.0373134	0.194444	0.0462963	0.238095	0.185841	4.15385	0.0387597
PDE4D_ENST00000507116	134	0.149254	0.80597	0.0447761	0.185185	0.0555556	0.3	0.175439	4.15385	0.046875
CXCR2	170	0.152941	0.805882	0.0411765	0.189781	0.0510949	0.269231	0.180556	4.15152	0.0429448
ACADS	103	0.184466	0.805825	0.00970874	0.228916	0.0120482	0.0526316	0.22619	4.15	0.00980392
POLE_ENST00000320574	896	0.152902	0.805804	0.0412946	0.189751	0.0512465	0.270073	0.180501	4.14943	0.0430733
OR2J3	139	0.179856	0.805755	0.0143885	0.223214	0.0178571	0.08	0.219298	4.14815	0.0145985
PTPRD_ENST00000537002	1142	0.136602	0.805604	0.0577933	0.169565	0.0717391	0.423077	0.158215	4.14414	0.0613383
KLHL10	108	0.185185	0.805556	0.00925926	0.229885	0.0114943	0.05	0.227273	4.14286	0.00934579
CDK11B_ENST00000317673	108	0.175926	0.805556	0.0185185	0.218391	0.0229885	0.105263	0.213483	4.14286	0.0188679
SERTAD4	108	0.148148	0.805556	0.0462963	0.183908	0.0574713	0.3125	0.173913	4.14286	0.0485437
FGFR1	401	0.164589	0.805486	0.0299252	0.204334	0.0371517	0.181818	0.197015	4.14103	0.0308483
GATA1	221	0.149321	0.80543	0.0452489	0.185393	0.0561798	0.30303	0.175532	4.13953	0.0473934
PROS1	267	0.161049	0.805243	0.0337079	0.2	0.0418605	0.209302	0.191964	4.13462	0.0348837
SMEK1_ENST00000417249	154	0.142857	0.805195	0.0519481	0.177419	0.0645161	0.363636	0.166667	4.13333	0.0547945
IFLTD1_ENST00000458174	118	0.161017	0.805085	0.0338983	0.2	0.0421053	0.210526	0.191919	4.13043	0.0350877
RSPH3	118	0.135593	0.805085	0.059322	0.168421	0.0736842	0.4375	0.156863	4.13043	0.0630631
RIOK2	118	0.110169	0.805085	0.0847458	0.136842	0.105263	0.769231	0.12381	4.13043	0.0925926
DZANK1_ENST00000377630	123	0.170732	0.804878	0.0243902	0.212121	0.030303	0.142857	0.205882	4.125	0.025
ZNF157	123	0.170732	0.804878	0.0243902	0.212121	0.030303	0.142857	0.205882	4.125	0.025
TCN1	123	0.162602	0.804878	0.0325203	0.20202	0.040404	0.2	0.194175	4.125	0.0336134
ESR1_ENST00000544394	210	0.142857	0.804762	0.052381	0.177515	0.0650888	0.366667	0.166667	4.12195	0.0552764
CDC25B	128	0.15625	0.804688	0.0390625	0.194175	0.0485437	0.25	0.185185	4.12	0.0406504
WDR36	215	0.134884	0.804651	0.0604651	0.16763	0.0751445	0.448276	0.155914	4.11905	0.0643564
ATR	870	0.114943	0.804598	0.0804598	0.142857	0.1	0.7	0.12987	4.11765	0.0875
FBXW7_ENST00000296555	1018	0.0304519	0.804519	0.165029	0.037851	0.205128	5.41935	0.0314083	4.11558	0.197647
DAO	138	0.144928	0.804348	0.0507246	0.18018	0.0630631	0.35	0.169492	4.11111	0.0534351
FLT1	741	0.14305	0.804318	0.0526316	0.177852	0.0654362	0.367925	0.166929	4.11034	0.0555556
EPC1	194	0.154639	0.804124	0.0412371	0.192308	0.0512821	0.266667	0.182927	4.10526	0.0430108
FBXW7	1332	0.027027	0.804054	0.168919	0.0336134	0.210084	6.25	0.0277778	4.10345	0.203252
FAM154B	102	0.186275	0.803922	0.00980392	0.231707	0.0121951	0.0526316	0.228916	4.1	0.00990099
LRRC37A2	102	0.176471	0.803922	0.0196078	0.219512	0.0243902	0.111111	0.214286	4.1	0.02
WIF1	102	0.147059	0.803922	0.0490196	0.182927	0.0609756	0.333333	0.172414	4.1	0.0515464
HPS3	209	0.191388	0.803828	0.00478469	0.238095	0.00595238	0.025	0.236686	4.09756	0.00480769
CKAP5_ENST00000415402	158	0.164557	0.803797	0.0316456	0.204724	0.0393701	0.192308	0.19697	4.09677	0.0326797
ZNF546	158	0.158228	0.803797	0.0379747	0.19685	0.0472441	0.24	0.18797	4.09677	0.0394737
FAM161A_ENST00000405894	158	0.132911	0.803797	0.0632911	0.165354	0.0787402	0.47619	0.153285	4.09677	0.0675676
PSD3	107	0.168224	0.803738	0.0280374	0.209302	0.0348837	0.166667	0.202247	4.09524	0.0288462
TRIM24_ENST00000378381	107	0.149533	0.803738	0.046729	0.186047	0.0581395	0.3125	0.175824	4.09524	0.0490196
ADCK5	112	0.178571	0.803571	0.0178571	0.222222	0.0222222	0.1	0.217391	4.09091	0.0181818
ULK2	173	0.150289	0.803468	0.0462428	0.18705	0.057554	0.307692	0.176871	4.08824	0.0484848
OR5V1	117	0.162393	0.803419	0.034188	0.202128	0.0425532	0.210526	0.193878	4.08696	0.0353982
KIAA0020	117	0.145299	0.803419	0.0512821	0.180851	0.0638298	0.352941	0.17	4.08696	0.0540541
SLU7	117	0.136752	0.803419	0.0598291	0.170213	0.0744681	0.4375	0.158416	4.08696	0.0636364
ZFP30	117	0.128205	0.803419	0.0683761	0.159574	0.0851064	0.533333	0.147059	4.08696	0.0733945
GFPT1_ENST00000357308	122	0.172131	0.803279	0.0245902	0.214286	0.0306122	0.142857	0.207921	4.08333	0.0252101
KRTAP13-1	122	0.172131	0.803279	0.0245902	0.214286	0.0306122	0.142857	0.207921	4.08333	0.0252101
ZNF529_ENST00000334116	122	0.163934	0.803279	0.0327869	0.204082	0.0408163	0.2	0.196078	4.08333	0.0338983
CDC25B_ENST00000245960	122	0.155738	0.803279	0.0409836	0.193878	0.0510204	0.263158	0.184466	4.08333	0.042735
ZNF529_ENST00000396897	127	0.165354	0.80315	0.0314961	0.205882	0.0392157	0.190476	0.198113	4.08	0.0325203
C10orf28	127	0.141732	0.80315	0.0551181	0.176471	0.0686275	0.388889	0.165138	4.08	0.0583333
RAG2	193	0.165803	0.803109	0.0310881	0.206452	0.0387097	0.1875	0.198758	4.07895	0.0320856
BLM	391	0.148338	0.803069	0.0485934	0.184713	0.0605096	0.327586	0.174174	4.07792	0.0510753
BMPR1B	132	0.159091	0.80303	0.0378788	0.198113	0.0471698	0.238095	0.189189	4.07692	0.0393701
ROS1	1203	0.128013	0.802993	0.0689942	0.15942	0.0859213	0.538961	0.146806	4.07595	0.0741071
PON3	137	0.182482	0.80292	0.0145985	0.227273	0.0181818	0.08	0.223214	4.07407	0.0148148
DZANK1_ENST00000357236	137	0.175182	0.80292	0.0218978	0.218182	0.0272727	0.125	0.212389	4.07407	0.0223881
C20orf151	142	0.183099	0.802817	0.0140845	0.22807	0.0175439	0.0769231	0.224138	4.07143	0.0142857
C16orf11	142	0.176056	0.802817	0.0211268	0.219298	0.0263158	0.12	0.213675	4.07143	0.0215827
BUB1	213	0.173709	0.802817	0.0234742	0.216374	0.0292398	0.135135	0.210227	4.07143	0.0240385
SLC2A13	142	0.161972	0.802817	0.0352113	0.201754	0.0438596	0.217391	0.193277	4.07143	0.0364964
TEKT3	152	0.171053	0.802632	0.0263158	0.213115	0.0327869	0.153846	0.206349	4.06667	0.027027
HNF4G	228	0.149123	0.802632	0.0482456	0.185792	0.0601093	0.323529	0.175258	4.06667	0.0506912
ZFP37	162	0.160494	0.802469	0.037037	0.2	0.0461538	0.230769	0.191176	4.0625	0.0384615
KIAA1967	167	0.185629	0.802395	0.011976	0.231343	0.0149254	0.0645161	0.227941	4.06061	0.0121212
TRPM6_ENST00000376864	253	0.146245	0.802372	0.0513834	0.182266	0.0640394	0.351351	0.171296	4.06	0.0541667
C6orf165_ENST00000369562	177	0.158192	0.80226	0.039548	0.197183	0.0492958	0.25	0.187919	4.05714	0.0411765
IRS1	450	0.175556	0.802222	0.0222222	0.218837	0.0277008	0.126582	0.212938	4.05618	0.0227273
MTRR	182	0.159341	0.802198	0.0384615	0.19863	0.0479452	0.241379	0.189542	4.05556	0.04
ANKRD31_ENST00000274361	182	0.10989	0.802198	0.0879121	0.136986	0.109589	0.8	0.123457	4.05556	0.0963855
INPP4B	374	0.136364	0.802139	0.0614973	0.17	0.0766667	0.45098	0.157895	4.05405	0.0655271
MYO9A	470	0.140426	0.802128	0.0574468	0.175066	0.071618	0.409091	0.163366	4.05376	0.0609481
FBXW7_NM_018315_2	1081	0.0370028	0.802035	0.160962	0.0461361	0.200692	4.35	0.0384246	4.0514	0.191841
OR14A16	202	0.183168	0.80198	0.0148515	0.228395	0.0185185	0.0810811	0.224242	4.05	0.0150754
KCTD18	101	0.158416	0.80198	0.039604	0.197531	0.0493827	0.25	0.188235	4.05	0.0412371
ZFYVE16	202	0.138614	0.80198	0.0594059	0.17284	0.0740741	0.428571	0.16092	4.05	0.0631579
GOPC_ENST00000535237	106	0.160377	0.801887	0.0377358	0.2	0.0470588	0.235294	0.191011	4.04762	0.0392157
POLH	106	0.150943	0.801887	0.0471698	0.188235	0.0588235	0.3125	0.177778	4.04762	0.049505
PVRL3_ENST00000493615	106	0.122642	0.801887	0.0754717	0.152941	0.0941176	0.615385	0.139785	4.04762	0.0816327
PARM1	111	0.18018	0.801802	0.018018	0.224719	0.0224719	0.1	0.21978	4.04545	0.0183486
GPR107_ENST00000372406	111	0.153153	0.801802	0.045045	0.191011	0.0561798	0.294118	0.180851	4.04545	0.0471698
DDX31_ENST00000310532	116	0.172414	0.801724	0.0258621	0.215054	0.0322581	0.15	0.208333	4.04348	0.0265487
AARSD1	116	0.163793	0.801724	0.0344828	0.204301	0.0430108	0.210526	0.195876	4.04348	0.0357143
MARVELD2	121	0.173554	0.801653	0.0247934	0.216495	0.0309278	0.142857	0.21	4.04167	0.0254237
ARHGEF37	121	0.165289	0.801653	0.0330579	0.206186	0.0412371	0.2	0.19802	4.04167	0.034188
HNRNPK_ENST00000376264	121	0.165289	0.801653	0.0330579	0.206186	0.0412371	0.2	0.19802	4.04167	0.034188
PDE4D_ENST00000360047	121	0.14876	0.801653	0.0495868	0.185567	0.0618557	0.333333	0.174757	4.04167	0.0521739
CYP3A43	126	0.166667	0.801587	0.031746	0.207921	0.039604	0.190476	0.2	4.04	0.0327869
ERRFI1	131	0.122137	0.801527	0.0763359	0.152381	0.0952381	0.625	0.13913	4.03846	0.0826446
TAF7L	136	0.154412	0.801471	0.0441176	0.192661	0.0550459	0.285714	0.182609	4.03704	0.0461538
CAPRIN1	136	0.139706	0.801471	0.0588235	0.174312	0.0733945	0.421053	0.162393	4.03704	0.0625
ERG_ENST00000417133	282	0.156028	0.801418	0.0425532	0.19469	0.0530973	0.272727	0.184874	4.03571	0.0444444
INTS6	141	0.156028	0.801418	0.0425532	0.19469	0.0530973	0.272727	0.184874	4.03571	0.0444444
ATP6V1A	151	0.15894	0.801325	0.0397351	0.198347	0.0495868	0.25	0.188976	4.03333	0.0413793
SMARCA4_ENST00000358026	1057	0.116367	0.801325	0.0823084	0.145218	0.102715	0.707317	0.131692	4.03333	0.0896907
MFN2	156	0.173077	0.801282	0.025641	0.216	0.032	0.148148	0.209302	4.03226	0.0263158
EIF2C4	161	0.136646	0.801242	0.0621118	0.170543	0.0775194	0.454545	0.158273	4.03125	0.0662252
MEF2BNB-MEF2B	166	0.186747	0.801205	0.0120482	0.233083	0.0150376	0.0645161	0.22963	4.0303	0.0121951
IGF1R	543	0.165746	0.801105	0.0331492	0.206897	0.0413793	0.2	0.198675	4.02778	0.0342857
ITCH	186	0.139785	0.801075	0.0591398	0.174497	0.0738255	0.423077	0.1625	4.02703	0.0628571
SH2B3	191	0.151832	0.801047	0.0471204	0.189542	0.0588235	0.310345	0.179012	4.02632	0.0494505
PITRM1	201	0.179104	0.800995	0.0199005	0.223602	0.0248447	0.111111	0.218182	4.025	0.0203046
[truncated: 13,215 more rows]

## Sheet: N500
Gene name; N500 (=997)	Number of substitutions	fS	fM	fN	rSM	rNM	rNS	rSMN	rMSN	rNSM
[truncated: 997 more rows]
