# Supplementary material for: Use of signals of positive and negative selection to distinguish cancer genes and passenger genes
Source: eLife. 2021 Jan 11;10:e59629. doi: 10.7554/eLife.59629 (PMC7877913; doi:10.7554/eLife.59629)
Supplement: Supplementary file 12. — Transcripts of OGs (oncogenes) and TSGs (tumor suppressor genes) of the cancer gene list of Vogelstein et al., 2013 are highlighted by brick red and light blue backgrounds, respectively. Transcripts of CGC (Cancer Gene Census) genes (SON, Sondka et al., 2018) that do not correspond to OGs or TSGs of the cancer gene list of Vogelstein et al., 2013 are highlighted by yellow background. Novel proto-oncogenes, TSGs and negatively selected tumor essential genes (TEGs) validated in the present work are shown in brown, dark blue, and green colors, respectively. Sheet ‘statistics’ contains a summary of the fS, fM, and fN parameters of datasets N0, N50, N100, N500, N02SD, N502SD, N1002SD, N5002SD and indicates the number of known and novel OGs, TSGs and TEGs that are present in the different datasets. [file elife-59629-supp12.xlsx]

## Sheet: CG_SOf_2SD
Gene name (occurring in at least one list)	AA length	Number of substitutions	Gene name; N0 CG_SOf_2SD(=2273)	fS	fM	fN	Gene name; N50 CG_SOf_2SD (=1846)	fS	fM	fN	Gene name; N100 CG_SOf_2SD (1060)	fS	fM	fN	Gene name; N500 CG_SOf_2SD (86)	fS	fM	fN
TP53	393	12532	TP53	0.0110118	0.820061	0.168928	TP53	0.0110118	0.820061	0.168928	TP53	0.0110118	0.820061	0.168928	TP53	0.0110118	0.820061	0.168928
TP53_ENST00000269305	393	11003	TP53_ENST00000269305	0.0106335	0.81805	0.171317	TP53_ENST00000269305	0.0106335	0.81805	0.171317	TP53_ENST00000269305	0.0106335	0.81805	0.171317	TP53_ENST00000269305	0.0106335	0.81805	0.171317
KRAS	188	10661	KRAS	0.00384579	0.995498	0.000656599	KRAS	0.00384579	0.995498	0.000656599	KRAS	0.00384579	0.995498	0.000656599	KRAS	0.00384579	0.995498	0.000656599
TP53_ENST00000455263	346	10059	TP53_ENST00000455263	0.011532	0.839547	0.148921	TP53_ENST00000455263	0.011532	0.839547	0.148921	TP53_ENST00000455263	0.011532	0.839547	0.148921	TP53_ENST00000455263	0.011532	0.839547	0.148921
TP53_ENST00000420246	341	9776	TP53_ENST00000420246	0.0126841	0.837152	0.150164	TP53_ENST00000420246	0.0126841	0.837152	0.150164	TP53_ENST00000420246	0.0126841	0.837152	0.150164	TP53_ENST00000420246	0.0126841	0.837152	0.150164
TP53_ENST00000413465	285	7555	TP53_ENST00000413465	0.0108537	0.83415	0.154997	TP53_ENST00000413465	0.0108537	0.83415	0.154997	TP53_ENST00000413465	0.0108537	0.83415	0.154997	TP53_ENST00000413465	0.0108537	0.83415	0.154997
TP53_ENST00000545858	154	6559	TP53_ENST00000545858	0.00472633	0.857448	0.137826	TP53_ENST00000545858	0.00472633	0.857448	0.137826	TP53_ENST00000545858	0.00472633	0.857448	0.137826	TP53_ENST00000545858	0.00472633	0.857448	0.137826
PIK3CA	1068	5839	PIK3CA	0.0101045	0.98373	0.00616544	PIK3CA	0.0101045	0.98373	0.00616544	PIK3CA	0.0101045	0.98373	0.00616544	PIK3CA	0.0101045	0.98373	0.00616544
BRAF	766	5024	BRAF	0.0147293	0.980494	0.00477707	BRAF	0.0147293	0.980494	0.00477707	BRAF	0.0147293	0.980494	0.00477707	BRAF	0.0147293	0.980494	0.00477707
KRAS_ENST00000256078	189	4842	KRAS_ENST00000256078	0.00743494	0.991945	0.000619579	KRAS_ENST00000256078	0.00743494	0.991945	0.000619579	KRAS_ENST00000256078	0.00743494	0.991945	0.000619579	KRAS_ENST00000256078	0.00743494	0.991945	0.000619579
APC	2843	4258	APC	0.0392203	0.249178	0.711602	APC	0.0392203	0.249178	0.711602	APC	0.0392203	0.249178	0.711602	APC	0.0392203	0.249178	0.711602
PIK3CA_ENST00000263967	1068	4241	PIK3CA_ENST00000263967	0.0103749	0.98208	0.00754539	PIK3CA_ENST00000263967	0.0103749	0.98208	0.00754539	PIK3CA_ENST00000263967	0.0103749	0.98208	0.00754539	PIK3CA_ENST00000263967	0.0103749	0.98208	0.00754539
TP53_ENST00000414315	90	3919	TP53_ENST00000414315	0.00459301	0.784129	0.211278	TP53_ENST00000414315	0.00459301	0.784129	0.211278	TP53_ENST00000414315	0.00459301	0.784129	0.211278	TP53_ENST00000414315	0.00459301	0.784129	0.211278
MLL2_ENST00000301067	5537	2548	MLL2_ENST00000301067	0.122057	0.662088	0.215856	MLL2_ENST00000301067	0.122057	0.662088	0.215856	MLL2_ENST00000301067	0.122057	0.662088	0.215856	MLL2_ENST00000301067	0.122057	0.662088	0.215856
CTNNB1	781	2518	CTNNB1	0.0142971	0.971803	0.0138999	CTNNB1	0.0142971	0.971803	0.0138999	CTNNB1	0.0142971	0.971803	0.0138999	CTNNB1	0.0142971	0.971803	0.0138999
KMT2D	5267	2445	KMT2D	0.112883	0.661759	0.225358	KMT2D	0.112883	0.661759	0.225358	KMT2D	0.112883	0.661759	0.225358	KMT2D	0.112883	0.661759	0.225358
KMT2C	4911	2171	KMT2C	0.111469	0.690926	0.197605	KMT2C	0.111469	0.690926	0.197605	KMT2C	0.111469	0.690926	0.197605	KMT2C	0.111469	0.690926	0.197605
MLL3_ENST00000355193	4968	2138	MLL3_ENST00000355193	0.112722	0.694107	0.193171	MLL3_ENST00000355193	0.112722	0.694107	0.193171	MLL3_ENST00000355193	0.112722	0.694107	0.193171	MLL3_ENST00000355193	0.112722	0.694107	0.193171
MED12	2177	2017	MED12	0.0525533	0.923153	0.0242935	MED12	0.0525533	0.923153	0.0242935	MED12	0.0525533	0.923153	0.0242935	MED12	0.0525533	0.923153	0.0242935
NOTCH1	2555	1962					NOTCH1	0.111111	0.750765	0.138124	NOTCH1	0.111111	0.750765	0.138124
PTEN	403	1951	PTEN	0.0194772	0.697078	0.283444	PTEN	0.0194772	0.697078	0.283444	PTEN	0.0194772	0.697078	0.283444	PTEN	0.0194772	0.697078	0.283444
IDH1	414	1912	IDH1	0.00732218	0.989017	0.00366109	IDH1	0.00732218	0.989017	0.00366109	IDH1	0.00732218	0.989017	0.00366109	IDH1	0.00732218	0.989017	0.00366109
EGFR	1210	1890					EGFR	0.0814815	0.906349	0.0121693	EGFR	0.0814815	0.906349	0.0121693	EGFR	0.0814815	0.906349	0.0121693
JAK2	1132	1888	JAK2	0.0291314	0.947564	0.0233051	JAK2	0.0291314	0.947564	0.0233051	JAK2	0.0291314	0.947564	0.0233051	JAK2	0.0291314	0.947564	0.0233051
FAT1	4588	1857	FAT1	0.149165	0.690361	0.160474	FAT1	0.149165	0.690361	0.160474	FAT1	0.149165	0.690361	0.160474
NOTCH1_ENST00000277541	2555	1855					NOTCH1_ENST00000277541	0.115364	0.748787	0.135849	NOTCH1_ENST00000277541	0.115364	0.748787	0.135849
FAT	4588	1796	FAT	0.149777	0.693764	0.156459	FAT	0.149777	0.693764	0.156459	FAT	0.149777	0.693764	0.156459
ARID1A	2285	1718	ARID1A	0.0541327	0.474971	0.470896	ARID1A	0.0541327	0.474971	0.470896	ARID1A	0.0541327	0.474971	0.470896	ARID1A	0.0541327	0.474971	0.470896
NF1	2839	1604	NF1	0.101621	0.597257	0.301122	NF1	0.101621	0.597257	0.301122	NF1	0.101621	0.597257	0.301122	NF1	0.101621	0.597257	0.301122
ATM	3056	1604	ATM	0.0673317	0.772444	0.160224	ATM	0.0673317	0.772444	0.160224	ATM	0.0673317	0.772444	0.160224	ATM	0.0673317	0.772444	0.160224
NRAS	189	1449	NRAS	0.00759144	0.988958	0.00345066	NRAS	0.00759144	0.988958	0.00345066	NRAS	0.00759144	0.988958	0.00345066	NRAS	0.00759144	0.988958	0.00345066
NF1_ENST00000358273	2839	1413	NF1_ENST00000358273	0.105449	0.619958	0.274593	NF1_ENST00000358273	0.105449	0.619958	0.274593	NF1_ENST00000358273	0.105449	0.619958	0.274593	NF1_ENST00000358273	0.105449	0.619958	0.274593
ATM_ENST00000278616	3056	1375	ATM_ENST00000278616	0.0661818	0.769455	0.164364	ATM_ENST00000278616	0.0661818	0.769455	0.164364	ATM_ENST00000278616	0.0661818	0.769455	0.164364	ATM_ENST00000278616	0.0661818	0.769455	0.164364
CREBBP	2442	1367	CREBBP	0.118508	0.739576	0.141917	CREBBP	0.118508	0.739576	0.141917	CREBBP	0.118508	0.739576	0.141917
FBXW7	707	1332	FBXW7	0.027027	0.804054	0.168919	FBXW7	0.027027	0.804054	0.168919	FBXW7	0.027027	0.804054	0.168919	FBXW7	0.027027	0.804054	0.168919
VHL	213	1297	VHL	0.0462606	0.736315	0.217425	VHL	0.0462606	0.736315	0.217425	VHL	0.0462606	0.736315	0.217425	VHL	0.0462606	0.736315	0.217425
FGFR3	806	1284	FGFR3	0.0700935	0.928349	0.00155763	FGFR3	0.0700935	0.928349	0.00155763	FGFR3	0.0700935	0.928349	0.00155763	FGFR3	0.0700935	0.928349	0.00155763
SF3B1	1304	1209	SF3B1	0.0430108	0.945409	0.0115798	SF3B1	0.0430108	0.945409	0.0115798	SF3B1	0.0430108	0.945409	0.0115798	SF3B1	0.0430108	0.945409	0.0115798
ATRX	2492	1184	ATRX	0.0777027	0.723818	0.19848	ATRX	0.0777027	0.723818	0.19848	ATRX	0.0777027	0.723818	0.19848	ATRX	0.0777027	0.723818	0.19848
ERBB4	1308	1179									ERBB4	0.112807	0.812553	0.0746395
SMAD4	552	1176	SMAD4	0.0246599	0.761905	0.213435	SMAD4	0.0246599	0.761905	0.213435	SMAD4	0.0246599	0.761905	0.213435	SMAD4	0.0246599	0.761905	0.213435
CDKN2A	156	1152	CDKN2A	0.0729167	0.582465	0.344618	CDKN2A	0.0729167	0.582465	0.344618	CDKN2A	0.0729167	0.582465	0.344618	CDKN2A	0.0729167	0.582465	0.344618
TET2	2002	1142	TET2	0.0507881	0.632224	0.316988	TET2	0.0507881	0.632224	0.316988	TET2	0.0507881	0.632224	0.316988	TET2	0.0507881	0.632224	0.316988
ATRX_ENST00000373344	2492	1132	ATRX_ENST00000373344	0.0786219	0.726148	0.19523	ATRX_ENST00000373344	0.0786219	0.726148	0.19523	ATRX_ENST00000373344	0.0786219	0.726148	0.19523	ATRX_ENST00000373344	0.0786219	0.726148	0.19523
SMARCA4	1647	1127									SMARCA4	0.113576	0.792369	0.094055
MTOR	2549	1126									MTOR	0.133215	0.824156	0.0426288
BRCA2	3418	1125					BRCA2	0.106667	0.792889	0.100444	BRCA2	0.106667	0.792889	0.100444
FBXW7_ENST00000281708	707	1124	FBXW7_ENST00000281708	0.0311388	0.798043	0.170819	FBXW7_ENST00000281708	0.0311388	0.798043	0.170819	FBXW7_ENST00000281708	0.0311388	0.798043	0.170819	FBXW7_ENST00000281708	0.0311388	0.798043	0.170819
ALK	1620	1096									ALK	0.141423	0.82208	0.0364964
ERBB4_ENST00000402597	1298	1093									ERBB4_ENST00000402597	0.116194	0.806953	0.0768527
EP300	2414	1093					EP300	0.0795974	0.78957	0.130833	EP300	0.0795974	0.78957	0.130833
BRCA2_ENST00000544455	3418	1082					BRCA2_ENST00000544455	0.108133	0.797597	0.0942699	BRCA2_ENST00000544455	0.108133	0.797597	0.0942699
FBXW7_NM_018315_2	627	1081	FBXW7_NM_018315_2	0.0370028	0.802035	0.160962	FBXW7_NM_018315_2	0.0370028	0.802035	0.160962	FBXW7_NM_018315_2	0.0370028	0.802035	0.160962	FBXW7_NM_018315_2	0.0370028	0.802035	0.160962
KIT	976	1081					KIT	0.0980574	0.884366	0.0175763	KIT	0.0980574	0.884366	0.0175763	KIT	0.0980574	0.884366	0.0175763
SETD2_ENST00000409792	2564	1070	SETD2_ENST00000409792	0.0682243	0.670093	0.261682	SETD2_ENST00000409792	0.0682243	0.670093	0.261682	SETD2_ENST00000409792	0.0682243	0.670093	0.261682	SETD2_ENST00000409792	0.0682243	0.670093	0.261682
SMARCA4_ENST00000358026	1679	1057									SMARCA4_ENST00000358026	0.116367	0.801325	0.0823084
RET	1114	1019					RET	0.133464	0.839058	0.0274779	RET	0.133464	0.839058	0.0274779
FBXW7_ENST00000296555	589	1018	FBXW7_ENST00000296555	0.0304519	0.804519	0.165029	FBXW7_ENST00000296555	0.0304519	0.804519	0.165029	FBXW7_ENST00000296555	0.0304519	0.804519	0.165029	FBXW7_ENST00000296555	0.0304519	0.804519	0.165029
NOTCH2	2471	1017					NOTCH2	0.115044	0.762045	0.122911	NOTCH2	0.115044	0.762045	0.122911
FBXW7_ENST00000534231	468	1004	FBXW7_ENST00000534231	0.0278884	0.817729	0.154382	FBXW7_ENST00000534231	0.0278884	0.817729	0.154382	FBXW7_ENST00000534231	0.0278884	0.817729	0.154382	FBXW7_ENST00000534231	0.0278884	0.817729	0.154382
ARID2	1835	1004	ARID2	0.0856574	0.609562	0.304781	ARID2	0.0856574	0.609562	0.304781	ARID2	0.0856574	0.609562	0.304781	ARID2	0.0856574	0.609562	0.304781
ERBB2	1255	969					ERBB2	0.0897833	0.895769	0.0144479	ERBB2	0.0897833	0.895769	0.0144479	ERBB2	0.0897833	0.895769	0.0144479
SETD2	2061	945	SETD2	0.0634921	0.67619	0.260317	SETD2	0.0634921	0.67619	0.260317	SETD2	0.0634921	0.67619	0.260317	SETD2	0.0634921	0.67619	0.260317
MGA	3114	875	MGA	0.138286	0.682286	0.179429	MGA	0.138286	0.682286	0.179429	MGA	0.138286	0.682286	0.179429
ATR	2644	870									ATR	0.114943	0.804598	0.0804598
PBRM1_ENST00000296302	1689	858	PBRM1_ENST00000296302	0.0722611	0.629371	0.298368	PBRM1_ENST00000296302	0.0722611	0.629371	0.298368	PBRM1_ENST00000296302	0.0722611	0.629371	0.298368	PBRM1_ENST00000296302	0.0722611	0.629371	0.298368
PBRM1	1582	844	PBRM1	0.0651659	0.61019	0.324645	PBRM1	0.0651659	0.61019	0.324645	PBRM1	0.0651659	0.61019	0.324645	PBRM1	0.0651659	0.61019	0.324645
DNMT3A	912	842					DNMT3A	0.103325	0.81829	0.0783848	DNMT3A	0.103325	0.81829	0.0783848
MED12_ENST00000374080	2177	839									MED12_ENST00000374080	0.121573	0.822408	0.0560191
NCOR1	2440	839	NCOR1	0.1323	0.709178	0.158522	NCOR1	0.1323	0.709178	0.158522	NCOR1	0.1323	0.709178	0.158522
RB1	928	836	RB1	0.0442584	0.399522	0.55622	RB1	0.0442584	0.399522	0.55622	RB1	0.0442584	0.399522	0.55622	RB1	0.0442584	0.399522	0.55622
ARID1B	2231	831					ARID1B	0.152828	0.712395	0.134777	ARID1B	0.152828	0.712395	0.134777
ERBB3	1342	814					ERBB3	0.100737	0.872236	0.027027	ERBB3	0.100737	0.872236	0.027027	ERBB3	0.100737	0.872236	0.027027
DICER1	1922	808					DICER1	0.111386	0.829208	0.0594059	DICER1	0.111386	0.829208	0.0594059
PBRM1_ENST00000356770	1602	803	PBRM1_ENST00000356770	0.0734745	0.627646	0.298879	PBRM1_ENST00000356770	0.0734745	0.627646	0.298879	PBRM1_ENST00000356770	0.0734745	0.627646	0.298879	PBRM1_ENST00000356770	0.0734745	0.627646	0.298879
ARID1B_ENST00000346085	2249	801					ARID1B_ENST00000346085	0.142322	0.732834	0.124844	ARID1B_ENST00000346085	0.142322	0.732834	0.124844
PTCH1	1447	796	PTCH1	0.16206	0.670854	0.167085	PTCH1	0.16206	0.670854	0.167085	PTCH1	0.16206	0.670854	0.167085
NOTCH4	2003	785									NOTCH4	0.119745	0.831847	0.0484076
KDM6A	1401	783	KDM6A	0.127714	0.586207	0.286079	KDM6A	0.127714	0.586207	0.286079	KDM6A	0.127714	0.586207	0.286079	KDM6A	0.127714	0.586207	0.286079
NCOR1_ENST00000395851	2337	780	NCOR1_ENST00000395851	0.132051	0.701282	0.166667	NCOR1_ENST00000395851	0.132051	0.701282	0.166667	NCOR1_ENST00000395851	0.132051	0.701282	0.166667
CDKN2A_ENST00000446177	167	773	CDKN2A_ENST00000446177	0.0582147	0.554981	0.386805	CDKN2A_ENST00000446177	0.0582147	0.554981	0.386805	CDKN2A_ENST00000446177	0.0582147	0.554981	0.386805	CDKN2A_ENST00000446177	0.0582147	0.554981	0.386805
ERBB3_ENST00000267101	1342	767					ERBB3_ENST00000267101	0.0925684	0.886571	0.0208605	ERBB3_ENST00000267101	0.0925684	0.886571	0.0208605	ERBB3_ENST00000267101	0.0925684	0.886571	0.0208605
CDKN2A_ENST00000498124	167	763	CDKN2A_ENST00000498124	0.0563565	0.564875	0.378768	CDKN2A_ENST00000498124	0.0563565	0.564875	0.378768	CDKN2A_ENST00000498124	0.0563565	0.564875	0.378768	CDKN2A_ENST00000498124	0.0563565	0.564875	0.378768
FLT3	993	755					FLT3	0.101987	0.864901	0.0331126	FLT3	0.101987	0.864901	0.0331126	FLT3	0.101987	0.864901	0.0331126
GNAS_ENST00000371100	1037	742					GNAS_ENST00000371100	0.132075	0.843666	0.0242588	GNAS_ENST00000371100	0.132075	0.843666	0.0242588
HRAS	189	737	HRAS	0.0149254	0.979647	0.00542741	HRAS	0.0149254	0.979647	0.00542741	HRAS	0.0149254	0.979647	0.00542741	HRAS	0.0149254	0.979647	0.00542741
GNAS	394	724	GNAS	0.0345304	0.94337	0.0220994	GNAS	0.0345304	0.94337	0.0220994	GNAS	0.0345304	0.94337	0.0220994	GNAS	0.0345304	0.94337	0.0220994
PIK3C2G	1445	713									PIK3C2G	0.12202	0.824684	0.0532959
ASXL1	1541	709	ASXL1	0.121298	0.619182	0.25952	ASXL1	0.121298	0.619182	0.25952	ASXL1	0.121298	0.619182	0.25952	ASXL1	0.121298	0.619182	0.25952
RB1_ENST00000267163	928	706	RB1_ENST00000267163	0.0495751	0.413598	0.536827	RB1_ENST00000267163	0.0495751	0.413598	0.536827	RB1_ENST00000267163	0.0495751	0.413598	0.536827	RB1_ENST00000267163	0.0495751	0.413598	0.536827
PIK3C2G_ENST00000433979	1445	703									PIK3C2G_ENST00000433979	0.119488	0.823613	0.056899
BCOR	1721	703	BCOR	0.162162	0.691323	0.146515	BCOR	0.162162	0.691323	0.146515	BCOR	0.162162	0.691323	0.146515
KDM6A_ENST00000377967	1401	701	KDM6A_ENST00000377967	0.148359	0.592011	0.259629	KDM6A_ENST00000377967	0.148359	0.592011	0.259629	KDM6A_ENST00000377967	0.148359	0.592011	0.259629	KDM6A_ENST00000377967	0.148359	0.592011	0.259629
KCNJ5	419	694	KCNJ5	0.0720461	0.919308	0.00864553	KCNJ5	0.0720461	0.919308	0.00864553	KCNJ5	0.0720461	0.919308	0.00864553	KCNJ5	0.0720461	0.919308	0.00864553
KDM6A_ENST00000382899	1408	694	KDM6A_ENST00000382899	0.151297	0.587896	0.260807	KDM6A_ENST00000382899	0.151297	0.587896	0.260807	KDM6A_ENST00000382899	0.151297	0.587896	0.260807	KDM6A_ENST00000382899	0.151297	0.587896	0.260807
BCOR_ENST00000378444	1755	685					BCOR_ENST00000378444	0.160584	0.70073	0.138686	BCOR_ENST00000378444	0.160584	0.70073	0.138686
STAG2	1231	670	STAG2	0.0940299	0.655224	0.250746	STAG2	0.0940299	0.655224	0.250746	STAG2	0.0940299	0.655224	0.250746	STAG2	0.0940299	0.655224	0.250746
KEAP1	624	652					KEAP1	0.0797546	0.842025	0.0782209	KEAP1	0.0797546	0.842025	0.0782209
CDH1	882	643	CDH1	0.11042	0.656299	0.233281	CDH1	0.11042	0.656299	0.233281	CDH1	0.11042	0.656299	0.233281	CDH1	0.11042	0.656299	0.233281
BRCA1	1863	630					BRCA1	0.107937	0.798413	0.0936508	BRCA1	0.107937	0.798413	0.0936508
STAG2_ENST00000218089	1268	624	STAG2_ENST00000218089	0.0913462	0.674679	0.233974	STAG2_ENST00000218089	0.0913462	0.674679	0.233974	STAG2_ENST00000218089	0.0913462	0.674679	0.233974	STAG2_ENST00000218089	0.0913462	0.674679	0.233974
MLL4	2717	623									MLL4	0.215088	0.672552	0.11236
ASXL1_ENST00000306058	1536	618	ASXL1_ENST00000306058	0.126214	0.642395	0.231392	ASXL1_ENST00000306058	0.126214	0.642395	0.231392	ASXL1_ENST00000306058	0.126214	0.642395	0.231392	ASXL1_ENST00000306058	0.126214	0.642395	0.231392
BRCA1_ENST00000471181	1884	612									BRCA1_ENST00000471181	0.112745	0.808824	0.0784314
FGFR2	821	611					FGFR2	0.106383	0.864157	0.0294599	FGFR2	0.106383	0.864157	0.0294599	FGFR2	0.106383	0.864157	0.0294599
NFE2L2	605	610	NFE2L2	0.0409836	0.934426	0.0245902	NFE2L2	0.0409836	0.934426	0.0245902	NFE2L2	0.0409836	0.934426	0.0245902	NFE2L2	0.0409836	0.934426	0.0245902
FAM123B_ENST00000330258	1135	607	FAM123B_ENST00000330258	0.0955519	0.621087	0.283361	FAM123B_ENST00000330258	0.0955519	0.621087	0.283361	FAM123B_ENST00000330258	0.0955519	0.621087	0.283361	FAM123B_ENST00000330258	0.0955519	0.621087	0.283361
FGFR3_ENST00000340107	808	599					FGFR3_ENST00000340107	0.130217	0.864775	0.00500835	FGFR3_ENST00000340107	0.130217	0.864775	0.00500835	FGFR3_ENST00000340107	0.130217	0.864775	0.00500835
HGF	728	598									HGF	0.118729	0.795987	0.0852843
PCDHA9_ENST00000532602	950	592									PCDHA9_ENST00000532602	0.371622	0.611486	0.0168919	PCDHA9_ENST00000532602	0.371622	0.611486	0.0168919
CNTN6	1028	586					CNTN6	0.187713	0.696246	0.116041	CNTN6	0.187713	0.696246	0.116041
ERBB2_ENST00000541774	1240	578	ERBB2_ENST00000541774	0.0692042	0.918685	0.0121107	ERBB2_ENST00000541774	0.0692042	0.918685	0.0121107	ERBB2_ENST00000541774	0.0692042	0.918685	0.0121107	ERBB2_ENST00000541774	0.0692042	0.918685	0.0121107
BAP1	729	572	BAP1	0.0681818	0.673077	0.258741	BAP1	0.0681818	0.673077	0.258741	BAP1	0.0681818	0.673077	0.258741	BAP1	0.0681818	0.673077	0.258741
KDM5C	1560	570					KDM5C	0.121053	0.75614	0.122807	KDM5C	0.121053	0.75614	0.122807
MED12_ENST00000333646	2180	567					MED12_ENST00000333646	0.0917108	0.850088	0.0582011	MED12_ENST00000333646	0.0917108	0.850088	0.0582011	MED12_ENST00000333646	0.0917108	0.850088	0.0582011
AXIN1	862	550	AXIN1	0.109091	0.66	0.230909	AXIN1	0.109091	0.66	0.230909	AXIN1	0.109091	0.66	0.230909	AXIN1	0.109091	0.66	0.230909
KDM5A_ENST00000399788	1690	541					KDM5A_ENST00000399788	0.101664	0.824399	0.0739372	KDM5A_ENST00000399788	0.101664	0.824399	0.0739372
KDM5A	1722	541					KDM5A	0.101664	0.824399	0.0739372	KDM5A	0.101664	0.824399	0.0739372
AMER1	804	537	AMER1	0.0856611	0.582868	0.331471	AMER1	0.0856611	0.582868	0.331471	AMER1	0.0856611	0.582868	0.331471	AMER1	0.0856611	0.582868	0.331471
ASXL2_ENST00000435504	1435	536	ASXL2_ENST00000435504	0.123134	0.729478	0.147388	ASXL2_ENST00000435504	0.123134	0.729478	0.147388	ASXL2_ENST00000435504	0.123134	0.729478	0.147388
CDK12	1490	531					CDK12	0.137476	0.73258	0.129944	CDK12	0.137476	0.73258	0.129944
MAP3K1_ENST00000399503	1512	531	MAP3K1_ENST00000399503	0.094162	0.728814	0.177024	MAP3K1_ENST00000399503	0.094162	0.728814	0.177024	MAP3K1_ENST00000399503	0.094162	0.728814	0.177024
PTPN11	593	527					PTPN11	0.0910816	0.880455	0.028463	PTPN11	0.0910816	0.880455	0.028463	PTPN11	0.0910816	0.880455	0.028463
RBM10	930	526	RBM10	0.0760456	0.589354	0.334601	RBM10	0.0760456	0.589354	0.334601	RBM10	0.0760456	0.589354	0.334601	RBM10	0.0760456	0.589354	0.334601
JAK1	1154	523					JAK1	0.10325	0.81262	0.08413	JAK1	0.10325	0.81262	0.08413
PCDHA11	796	518									PCDHA11	0.370656	0.600386	0.0289575	PCDHA11	0.370656	0.600386	0.0289575
PCDHA9	842	518					PCDHA9	0.389961	0.594595	0.015444	PCDHA9	0.389961	0.594595	0.015444	PCDHA9	0.389961	0.594595	0.015444
ESR1	595	514					ESR1	0.105058	0.867704	0.0272374	ESR1	0.105058	0.867704	0.0272374	ESR1	0.105058	0.867704	0.0272374
EGFR_ENST00000344576	705	514					EGFR_ENST00000344576	0.14786	0.836576	0.0155642	EGFR_ENST00000344576	0.14786	0.836576	0.0155642
AKT1	480	509	AKT1	0.0667976	0.923379	0.00982318	AKT1	0.0667976	0.923379	0.00982318	AKT1	0.0667976	0.923379	0.00982318	AKT1	0.0667976	0.923379	0.00982318
NF2	595	507	NF2	0.0433925	0.392505	0.564103	NF2	0.0433925	0.392505	0.564103	NF2	0.0433925	0.392505	0.564103	NF2	0.0433925	0.392505	0.564103
PIK3C2G_ENST00000538779	1486	504					PIK3C2G_ENST00000538779	0.0912698	0.859127	0.0496032	PIK3C2G_ENST00000538779	0.0912698	0.859127	0.0496032	PIK3C2G_ENST00000538779	0.0912698	0.859127	0.0496032
RICTOR_ENST00000296782	1732	501									RICTOR_ENST00000296782	0.11976	0.818363	0.0618762
TSC1	1164	500	TSC1	0.158	0.672	0.17	TSC1	0.158	0.672	0.17	TSC1	0.158	0.672	0.17
PLCG1	1291	500									PLCG1	0.15	0.822	0.028
FGFR2_ENST00000457416	822	493					FGFR2_ENST00000457416	0.111562	0.855984	0.0324544	FGFR2_ENST00000457416	0.111562	0.855984	0.0324544
CTCF	727	492	CTCF	0.0833333	0.74187	0.174797	CTCF	0.0833333	0.74187	0.174797	CTCF	0.0833333	0.74187	0.174797
FGFR2_ENST00000351936	785	489					FGFR2_ENST00000351936	0.114519	0.854806	0.0306748	FGFR2_ENST00000351936	0.114519	0.854806	0.0306748
YLPM1_ENST00000325680	2146	484	YLPM1_ENST00000325680	0.192149	0.665289	0.142562	YLPM1_ENST00000325680	0.192149	0.665289	0.142562	YLPM1_ENST00000325680	0.192149	0.665289	0.142562
ZNF292_ENST00000369577	2723	484					ZNF292_ENST00000369577	0.163223	0.698347	0.13843	ZNF292_ENST00000369577	0.163223	0.698347	0.13843
TNRC6B_ENST00000454349	1847	474					TNRC6B_ENST00000454349	0.280591	0.578059	0.14135	TNRC6B_ENST00000454349	0.280591	0.578059	0.14135
EPHA3_ENST00000452448	539	473									EPHA3_ENST00000452448	0.112051	0.788584	0.0993658
RNF43	783	472	RNF43	0.0889831	0.680085	0.230932	RNF43	0.0889831	0.680085	0.230932	RNF43	0.0889831	0.680085	0.230932
PIK3R1	724	471	PIK3R1	0.0573248	0.700637	0.242038	PIK3R1	0.0573248	0.700637	0.242038	PIK3R1	0.0573248	0.700637	0.242038
TET2_ENST00000305737	1165	470	TET2_ENST00000305737	0.0787234	0.617021	0.304255	TET2_ENST00000305737	0.0787234	0.617021	0.304255	TET2_ENST00000305737	0.0787234	0.617021	0.304255
USP9X	2547	469					USP9X	0.168443	0.710021	0.121535	USP9X	0.168443	0.710021	0.121535
EZH2	751	467					EZH2	0.0792291	0.862955	0.0578158	EZH2	0.0792291	0.862955	0.0578158
TSHR	764	467					TSHR	0.124197	0.850107	0.0256959	TSHR	0.124197	0.850107	0.0256959
AXL	885	467									AXL	0.149893	0.826552	0.0235546
MSH6	1360	465	MSH6	0.107527	0.744086	0.148387	MSH6	0.107527	0.744086	0.148387	MSH6	0.107527	0.744086	0.148387
ZNF292	2578	465					ZNF292	0.15914	0.707527	0.133333	ZNF292	0.15914	0.707527	0.133333
KDM5C_ENST00000452825	1379	464					KDM5C_ENST00000452825	0.122845	0.758621	0.118534	KDM5C_ENST00000452825	0.122845	0.758621	0.118534
TBX3	743	462									TBX3	0.116883	0.820346	0.0627706
LATS1_ENST00000253339	1130	459	LATS1_ENST00000253339	0.0784314	0.775599	0.145969	LATS1_ENST00000253339	0.0784314	0.775599	0.145969	LATS1_ENST00000253339	0.0784314	0.775599	0.145969
USP9X_ENST00000324545	2570	452					USP9X_ENST00000324545	0.163717	0.714602	0.121681	USP9X_ENST00000324545	0.163717	0.714602	0.121681
FBXW7_ENST00000393956	531	449	FBXW7_ENST00000393956	0.00890869	0.859688	0.131403	FBXW7_ENST00000393956	0.00890869	0.859688	0.131403	FBXW7_ENST00000393956	0.00890869	0.859688	0.131403
LATS1_ENST00000543571	1130	448	LATS1_ENST00000543571	0.0803571	0.770089	0.149554	LATS1_ENST00000543571	0.0803571	0.770089	0.149554	LATS1_ENST00000543571	0.0803571	0.770089	0.149554
STK11	433	447	STK11	0.064877	0.635347	0.299776	STK11	0.064877	0.635347	0.299776	STK11	0.064877	0.635347	0.299776
TAF1	1872	444					TAF1	0.121622	0.849099	0.0292793	TAF1	0.121622	0.849099	0.0292793
PPP2R1A	589	441					PPP2R1A	0.0997732	0.875283	0.0249433	PPP2R1A	0.0997732	0.875283	0.0249433
TGFBR2	567	436					TGFBR2	0.0665138	0.809633	0.123853	TGFBR2	0.0665138	0.809633	0.123853
PCDHGA3_ENST00000253812	932	436									PCDHGA3_ENST00000253812	0.37156	0.594037	0.0344037
FGFR2_ENST00000357555	707	435					FGFR2_ENST00000357555	0.103448	0.862069	0.0344828	FGFR2_ENST00000357555	0.103448	0.862069	0.0344828
FGFR2_ENST00000369056	769	430					FGFR2_ENST00000369056	0.104651	0.860465	0.0348837	FGFR2_ENST00000369056	0.104651	0.860465	0.0348837
ZC3H13	1564	429					ZC3H13	0.142191	0.724942	0.132867	ZC3H13	0.142191	0.724942	0.132867
CASP8	496	426	CASP8	0.056338	0.711268	0.232394	CASP8	0.056338	0.711268	0.232394	CASP8	0.056338	0.711268	0.232394
SPOP	374	423	SPOP	0.0283688	0.940898	0.0307329	SPOP	0.0283688	0.940898	0.0307329	SPOP	0.0283688	0.940898	0.0307329
ZC3H13_ENST00000242848	1668	423					ZC3H13_ENST00000242848	0.141844	0.718676	0.13948	ZC3H13_ENST00000242848	0.141844	0.718676	0.13948
RASA1	1047	422	RASA1	0.0758294	0.718009	0.206161	RASA1	0.0758294	0.718009	0.206161	RASA1	0.0758294	0.718009	0.206161
MYD88	309	420	MYD88	0.0309524	0.954762	0.0142857	MYD88	0.0309524	0.954762	0.0142857	MYD88	0.0309524	0.954762	0.0142857
CASP8_ENST00000358485	538	420	CASP8_ENST00000358485	0.047619	0.72381	0.228571	CASP8_ENST00000358485	0.047619	0.72381	0.228571	CASP8_ENST00000358485	0.047619	0.72381	0.228571
YLPM1	1822	420	YLPM1	0.188095	0.664286	0.147619	YLPM1	0.188095	0.664286	0.147619	YLPM1	0.188095	0.664286	0.147619
PTPRS_ENST00000262963	1928	416					PTPRS_ENST00000262963	0.0865385	0.887019	0.0264423	PTPRS_ENST00000262963	0.0865385	0.887019	0.0264423
TAF1_ENST00000276072	1893	415					TAF1_ENST00000276072	0.127711	0.845783	0.026506	TAF1_ENST00000276072	0.127711	0.845783	0.026506
IRS2	1338	413					IRS2	0.138015	0.854722	0.00726392	IRS2	0.138015	0.854722	0.00726392
EZH2_ENST00000350995	707	410					EZH2_ENST00000350995	0.0902439	0.853659	0.0560976	EZH2_ENST00000350995	0.0902439	0.853659	0.0560976
WT1	449	409	WT1	0.102689	0.677262	0.220049	WT1	0.102689	0.677262	0.220049	WT1	0.102689	0.677262	0.220049
AHCTF1	2266	408					AHCTF1	0.196078	0.691176	0.112745	AHCTF1	0.196078	0.691176	0.112745
GRM6	877	406					GRM6	0.376847	0.583744	0.0394089	GRM6	0.376847	0.583744	0.0394089
IDH2	452	404	IDH2	0.0420792	0.935644	0.0222772	IDH2	0.0420792	0.935644	0.0222772	IDH2	0.0420792	0.935644	0.0222772
PCDHGA3	836	400									PCDHGA3	0.365	0.5975	0.0375
TGFBR2_ENST00000359013	592	397					TGFBR2_ENST00000359013	0.0629723	0.828715	0.108312	TGFBR2_ENST00000359013	0.0629723	0.828715	0.108312
BRIP1	1249	395					BRIP1	0.106329	0.837975	0.0556962	BRIP1	0.106329	0.837975	0.0556962
PCDHGB1	927	394									PCDHGB1	0.36802	0.609137	0.0228426
PCDHGB1_ENST00000523390	927	394									PCDHGB1_ENST00000523390	0.370558	0.609137	0.0203046
NTRK2	838	392									NTRK2	0.132653	0.82398	0.0433673
GRLF1_ENST00000317082	1513	392	GRLF1_ENST00000317082	0.17602	0.67602	0.147959	GRLF1_ENST00000317082	0.17602	0.67602	0.147959	GRLF1_ENST00000317082	0.17602	0.67602	0.147959
BCL11A_ENST00000356842	773	388									BCL11A_ENST00000356842	0.376289	0.613402	0.0103093
BRIP1_ENST00000259008	1249	386					BRIP1_ENST00000259008	0.108808	0.836788	0.0544041	BRIP1_ENST00000259008	0.108808	0.836788	0.0544041
MEN1	610	384	MEN1	0.114583	0.664062	0.221354	MEN1	0.114583	0.664062	0.221354	MEN1	0.114583	0.664062	0.221354
PCDHGA12_ENST00000252085	932	384					PCDHGA12_ENST00000252085	0.388021	0.609375	0.00260417	PCDHGA12_ENST00000252085	0.388021	0.609375	0.00260417
CASP8_ENST00000264275	496	383	CASP8_ENST00000264275	0.0522193	0.715405	0.232376	CASP8_ENST00000264275	0.0522193	0.715405	0.232376	CASP8_ENST00000264275	0.0522193	0.715405	0.232376
PCDHGA12	932	383					PCDHGA12	0.389034	0.608355	0.00261097	PCDHGA12	0.389034	0.608355	0.00261097
RAD50_ENST00000265335	1312	383					RAD50_ENST00000265335	0.0861619	0.835509	0.078329	RAD50_ENST00000265335	0.0861619	0.835509	0.078329
NTRK2_ENST00000376214	838	381									NTRK2_ENST00000376214	0.131234	0.824147	0.0446194
RUNX1	480	380					RUNX1	0.1	0.776316	0.123684	RUNX1	0.1	0.776316	0.123684
RASA1_ENST00000456692	870	379	RASA1_ENST00000456692	0.0791557	0.704485	0.216359	RASA1_ENST00000456692	0.0791557	0.704485	0.216359	RASA1_ENST00000456692	0.0791557	0.704485	0.216359
GRLF1	1513	371	GRLF1	0.175202	0.679245	0.145553	GRLF1	0.175202	0.679245	0.145553	GRLF1	0.175202	0.679245	0.145553
TAF1_ENST00000449580	1906	370									TAF1_ENST00000449580	0.137838	0.832432	0.0297297
HRAS_ENST00000397594	170	369	HRAS_ENST00000397594	0.0243902	0.96206	0.0135501	HRAS_ENST00000397594	0.0243902	0.96206	0.0135501	HRAS_ENST00000397594	0.0243902	0.96206	0.0135501
TCF7L2_ENST00000543371	602	364	TCF7L2_ENST00000543371	0.137363	0.714286	0.148352	TCF7L2_ENST00000543371	0.137363	0.714286	0.148352	TCF7L2_ENST00000543371	0.137363	0.714286	0.148352
FOXA1	472	362					FOXA1	0.132597	0.861878	0.00552486	FOXA1	0.132597	0.861878	0.00552486
MLLT4_ENST00000392108	1651	361					MLLT4_ENST00000392108	0.163435	0.720222	0.116343	MLLT4_ENST00000392108	0.163435	0.720222	0.116343
MSH2	934	359	MSH2	0.122563	0.649025	0.228412	MSH2	0.122563	0.649025	0.228412	MSH2	0.122563	0.649025	0.228412
ASXL2	918	353	ASXL2	0.135977	0.711048	0.152975	ASXL2	0.135977	0.711048	0.152975	ASXL2	0.135977	0.711048	0.152975
PIK3CB	1070	353									PIK3CB	0.113314	0.82153	0.0651558
RECQL4	1208	352					RECQL4	0.110795	0.866477	0.0227273	RECQL4	0.110795	0.866477	0.0227273
WT1_ENST00000332351	517	349	WT1_ENST00000332351	0.103152	0.719198	0.17765	WT1_ENST00000332351	0.103152	0.719198	0.17765	WT1_ENST00000332351	0.103152	0.719198	0.17765
ERCC2_ENST00000391945	760	349					ERCC2_ENST00000391945	0.114613	0.873926	0.0114613	ERCC2_ENST00000391945	0.114613	0.873926	0.0114613
XPO1	1071	346					XPO1	0.121387	0.84104	0.0375723	XPO1	0.121387	0.84104	0.0375723
PIK3R1_ENST00000336483	454	341	PIK3R1_ENST00000336483	0.0410557	0.715543	0.243402	PIK3R1_ENST00000336483	0.0410557	0.715543	0.243402	PIK3R1_ENST00000336483	0.0410557	0.715543	0.243402
ZNF626_ENST00000392298	528	341									ZNF626_ENST00000392298	0.134897	0.821114	0.0439883
RAD50	1173	341					RAD50	0.0909091	0.824047	0.085044	RAD50	0.0909091	0.824047	0.085044
PIK3R1_ENST00000320694	424	339	PIK3R1_ENST00000320694	0.0412979	0.713864	0.244838	PIK3R1_ENST00000320694	0.0412979	0.713864	0.244838	PIK3R1_ENST00000320694	0.0412979	0.713864	0.244838
STK11_ENST00000326873	433	338	STK11_ENST00000326873	0.0473373	0.64497	0.307692	STK11_ENST00000326873	0.0473373	0.64497	0.307692	STK11_ENST00000326873	0.0473373	0.64497	0.307692
SMO	787	338					SMO	0.112426	0.857988	0.0295858	SMO	0.112426	0.857988	0.0295858
ARHGAP35	1499	338					ARHGAP35	0.192308	0.674556	0.133136	ARHGAP35	0.192308	0.674556	0.133136
U2AF1	240	337	U2AF1	0.0534125	0.931751	0.0148368	U2AF1	0.0534125	0.931751	0.0148368	U2AF1	0.0534125	0.931751	0.0148368
TCF7L2	596	337	TCF7L2	0.15727	0.694362	0.148368	TCF7L2	0.15727	0.694362	0.148368	TCF7L2	0.15727	0.694362	0.148368
EXT1	746	337	EXT1	0.48368	0.489614	0.0267062	EXT1	0.48368	0.489614	0.0267062	EXT1	0.48368	0.489614	0.0267062
NOVA1	507	336					NOVA1	0.431548	0.517857	0.0505952	NOVA1	0.431548	0.517857	0.0505952
SIN3A	1273	334					SIN3A	0.188623	0.673653	0.137725	SIN3A	0.188623	0.673653	0.137725
FOXP1	677	330									FOXP1	0.178788	0.709091	0.112121
MAP2K4	399	324	MAP2K4	0.0802469	0.743827	0.175926	MAP2K4	0.0802469	0.743827	0.175926	MAP2K4	0.0802469	0.743827	0.175926
MYC_ENST00000377970	454	324									MYC_ENST00000377970	0.160494	0.824074	0.0154321
SMAD2	467	320	SMAD2	0.05625	0.66875	0.275	SMAD2	0.05625	0.66875	0.275	SMAD2	0.05625	0.66875	0.275
TNRC6B	1723	319					TNRC6B	0.278997	0.605016	0.115987	TNRC6B	0.278997	0.605016	0.115987
USP7	1102	318					USP7	0.188679	0.694969	0.116352	USP7	0.188679	0.694969	0.116352
FOXG1	489	316	FOXG1	0.46519	0.515823	0.0189873	FOXG1	0.46519	0.515823	0.0189873	FOXG1	0.46519	0.515823	0.0189873
SMAD3	425	315					SMAD3	0.107937	0.796825	0.0952381	SMAD3	0.107937	0.796825	0.0952381
DIS3	958	313					DIS3	0.111821	0.833866	0.0543131	DIS3	0.111821	0.833866	0.0543131
MLH1	756	310	MLH1	0.129032	0.683871	0.187097	MLH1	0.129032	0.683871	0.187097	MLH1	0.129032	0.683871	0.187097
ITGA11	1188	309					ITGA11	0.401294	0.576052	0.0226537	ITGA11	0.401294	0.576052	0.0226537
RHOA	193	308	RHOA	0.0487013	0.941558	0.00974026	RHOA	0.0487013	0.941558	0.00974026	RHOA	0.0487013	0.941558	0.00974026
MYC	439	308									MYC	0.159091	0.824675	0.0162338
BCL6	706	308					BCL6	0.133117	0.834416	0.0324675	BCL6	0.133117	0.834416	0.0324675
GIGYF2	1299	308	GIGYF2	0.159091	0.662338	0.178571	GIGYF2	0.159091	0.662338	0.178571	GIGYF2	0.159091	0.662338	0.178571
SCAF4	1147	307					SCAF4	0.156352	0.71987	0.123779	SCAF4	0.156352	0.71987	0.123779
ETV6	452	306									ETV6	0.114379	0.820261	0.0653595
TRAF7	670	306					TRAF7	0.107843	0.866013	0.0261438	TRAF7	0.107843	0.866013	0.0261438
XRN1	1706	305									XRN1	0.114754	0.809836	0.0754098
GATA2	480	303					GATA2	0.10231	0.864686	0.0330033	GATA2	0.10231	0.864686	0.0330033
ATF7IP	1270	303									ATF7IP	0.19802	0.689769	0.112211
DAXX	740	302					DAXX	0.162252	0.711921	0.125828	DAXX	0.162252	0.711921	0.125828
SOX9	509	300	SOX9	0.106667	0.636667	0.256667	SOX9	0.106667	0.636667	0.256667	SOX9	0.106667	0.636667	0.256667
TCF7L2_ENST00000355717	489	299	TCF7L2_ENST00000355717	0.157191	0.662207	0.180602	TCF7L2_ENST00000355717	0.157191	0.662207	0.180602	TCF7L2_ENST00000355717	0.157191	0.662207	0.180602
MPL	635	296									MPL	0.121622	0.831081	0.0472973
GNAQ	359	295									GNAQ	0.125424	0.823729	0.0508475
EGFR_ENST00000442591	657	293					EGFR_ENST00000442591	0.122867	0.863481	0.0136519	EGFR_ENST00000442591	0.122867	0.863481	0.0136519
FOXP2	740	293					FOXP2	0.372014	0.580205	0.0477816	FOXP2	0.372014	0.580205	0.0477816
SLC45A4	798	292					SLC45A4	0.393836	0.59589	0.010274	SLC45A4	0.393836	0.59589	0.010274
USP28	1077	292	USP28	0.143836	0.712329	0.143836	USP28	0.143836	0.712329	0.143836	USP28	0.143836	0.712329	0.143836
TGFBR1	503	290					TGFBR1	0.062069	0.796552	0.141379	TGFBR1	0.062069	0.796552	0.141379
GNA11	359	288					GNA11	0.135417	0.850694	0.0138889	GNA11	0.135417	0.850694	0.0138889
GIGYF2_ENST00000409451	1320	288	GIGYF2_ENST00000409451	0.159722	0.673611	0.166667	GIGYF2_ENST00000409451	0.159722	0.673611	0.166667	GIGYF2_ENST00000409451	0.159722	0.673611	0.166667
CUL3	768	287									CUL3	0.111498	0.790941	0.097561
PDS5B	1447	287					PDS5B	0.174216	0.710801	0.114983	PDS5B	0.174216	0.710801	0.114983
MYCN	464	286					MYCN	0.0909091	0.888112	0.020979	MYCN	0.0909091	0.888112	0.020979
DDX3X	662	282					DDX3X	0.0992908	0.822695	0.0780142	DDX3X	0.0992908	0.822695	0.0780142
PMS1	932	282					PMS1	0.106383	0.787234	0.106383	PMS1	0.106383	0.787234	0.106383
SLC12A7	1083	281									SLC12A7	0.370107	0.597865	0.0320285
SMARCB1	385	279	SMARCB1	0.103943	0.691756	0.204301	SMARCB1	0.103943	0.691756	0.204301	SMARCB1	0.103943	0.691756	0.204301
RAF1	648	279					RAF1	0.125448	0.835125	0.0394265	RAF1	0.125448	0.835125	0.0394265
NF2_ENST00000403999	590	278	NF2_ENST00000403999	0.0503597	0.564748	0.384892	NF2_ENST00000403999	0.0503597	0.564748	0.384892	NF2_ENST00000403999	0.0503597	0.564748	0.384892
U2AF1_ENST00000380276	240	277	U2AF1_ENST00000380276	0.0685921	0.913357	0.0180505	U2AF1_ENST00000380276	0.0685921	0.913357	0.0180505	U2AF1_ENST00000380276	0.0685921	0.913357	0.0180505
BCOR_ENST00000378463	622	277					BCOR_ENST00000378463	0.133574	0.732852	0.133574	BCOR_ENST00000378463	0.133574	0.732852	0.133574
SLC34A2	690	277									SLC34A2	0.368231	0.602888	0.0288809
RSF1	1441	277					RSF1	0.155235	0.729242	0.115523	RSF1	0.155235	0.729242	0.115523
SRSF2	221	274	SRSF2	0.0620438	0.923358	0.0145985	SRSF2	0.0620438	0.923358	0.0145985	SRSF2	0.0620438	0.923358	0.0145985
RAD21	631	274					RAD21	0.105839	0.755474	0.138686	RAD21	0.105839	0.755474	0.138686
ENSG00000174501	1778	274					ENSG00000174501	0.131387	0.843066	0.0255474	ENSG00000174501	0.131387	0.843066	0.0255474
GJA8	433	273					GJA8	0.388278	0.589744	0.021978	GJA8	0.388278	0.589744	0.021978
MAP2K1	393	272					MAP2K1	0.0772059	0.900735	0.0220588	MAP2K1	0.0772059	0.900735	0.0220588
EGFR_ENST00000342916	628	272					EGFR_ENST00000342916	0.113971	0.875	0.0110294	EGFR_ENST00000342916	0.113971	0.875	0.0110294
KIAA1267	1105	272					KIAA1267	0.202206	0.672794	0.125	KIAA1267	0.202206	0.672794	0.125
RAF1_ENST00000442415	668	270									RAF1_ENST00000442415	0.12963	0.82963	0.0407407
PCDHGA9	932	270									PCDHGA9	0.362963	0.596296	0.0407407
PCDHGA9_ENST00000573521	932	270									PCDHGA9_ENST00000573521	0.362963	0.596296	0.0407407
USP43	1123	270	USP43	0.185185	0.666667	0.148148	USP43	0.185185	0.666667	0.148148	USP43	0.185185	0.666667	0.148148
WT1_ENST00000379079	302	269	WT1_ENST00000379079	0.100372	0.70632	0.193309	WT1_ENST00000379079	0.100372	0.70632	0.193309	WT1_ENST00000379079	0.100372	0.70632	0.193309
FOXL2	376	268	FOXL2	0.0783582	0.914179	0.00746269	FOXL2	0.0783582	0.914179	0.00746269	FOXL2	0.0783582	0.914179	0.00746269
NMUR2	415	268									NMUR2	0.373134	0.604478	0.0223881
MLLT3	568	268	MLLT3	0.626866	0.354478	0.0186567	MLLT3	0.626866	0.354478	0.0186567	MLLT3	0.626866	0.354478	0.0186567
POT1	634	268					POT1	0.108209	0.809701	0.0820896	POT1	0.108209	0.809701	0.0820896
H3F3A	136	265	H3F3A	0.0264151	0.969811	0.00377358	H3F3A	0.0264151	0.969811	0.00377358	H3F3A	0.0264151	0.969811	0.00377358
IL1RAPL1	696	265					IL1RAPL1	0.222642	0.660377	0.116981	IL1RAPL1	0.222642	0.660377	0.116981
ETV1	477	264									ETV1	0.117424	0.829545	0.0530303
IL1RAPL1_ENST00000378993	696	262					IL1RAPL1_ENST00000378993	0.221374	0.664122	0.114504	IL1RAPL1_ENST00000378993	0.221374	0.664122	0.114504
LATS1_ENST00000392273	690	261	LATS1_ENST00000392273	0.0881226	0.750958	0.16092	LATS1_ENST00000392273	0.0881226	0.750958	0.16092	LATS1_ENST00000392273	0.0881226	0.750958	0.16092
SLC18A3	532	259					SLC18A3	0.416988	0.567568	0.015444	SLC18A3	0.416988	0.567568	0.015444
FOXP2_ENST00000403559	732	259					FOXP2_ENST00000403559	0.389961	0.563707	0.046332	FOXP2_ENST00000403559	0.389961	0.563707	0.046332
OR2T4	348	258									OR2T4	0.356589	0.593023	0.0503876
DENND4C	1673	253					DENND4C	0.142292	0.837945	0.0197628	DENND4C	0.142292	0.837945	0.0197628
POT1_ENST00000357628	634	252					POT1_ENST00000357628	0.111111	0.813492	0.0753968	POT1_ENST00000357628	0.111111	0.813492	0.0753968
PDS5A	1337	251									PDS5A	0.139442	0.820717	0.0398406
MRGPRX1	322	250					MRGPRX1	0.388	0.588	0.024	MRGPRX1	0.388	0.588	0.024
CDC73	531	250	CDC73	0.064	0.776	0.16	CDC73	0.064	0.776	0.16	CDC73	0.064	0.776	0.16
STAT5B	787	248					STAT5B	0.112903	0.842742	0.0443548	STAT5B	0.112903	0.842742	0.0443548
SMC1A	1233	248					SMC1A	0.125	0.83871	0.0362903	SMC1A	0.125	0.83871	0.0362903
DYRK1A	763	243					DYRK1A	0.300412	0.576132	0.123457	DYRK1A	0.300412	0.576132	0.123457
BARD1	777	243					BARD1	0.111111	0.831276	0.0576132	BARD1	0.111111	0.831276	0.0576132
JAK3_ENST00000534444	1094	243					JAK3_ENST00000534444	0.0658436	0.868313	0.0658436	JAK3_ENST00000534444	0.0658436	0.868313	0.0658436
CHEK2	543	242					CHEK2	0.0743802	0.834711	0.0909091	CHEK2	0.0743802	0.834711	0.0909091
ZNF750	723	240	ZNF750	0.204167	0.595833	0.2	ZNF750	0.204167	0.595833	0.2	ZNF750	0.204167	0.595833	0.2
MATR3	847	240					MATR3	0.425	0.545833	0.0291667	MATR3	0.425	0.545833	0.0291667
BMPR2	1038	240	BMPR2	0.170833	0.675	0.154167	BMPR2	0.170833	0.675	0.154167	BMPR2	0.170833	0.675	0.154167
TRPV4	871	239					TRPV4	0.389121	0.585774	0.0251046	TRPV4	0.389121	0.585774	0.0251046
USP8	1118	238									USP8	0.121849	0.831933	0.0462185
AR_ENST00000396043	388	237	AR_ENST00000396043	0.0421941	0.894515	0.0632911	AR_ENST00000396043	0.0421941	0.894515	0.0632911	AR_ENST00000396043	0.0421941	0.894515	0.0632911
ACVR2A	513	237	ACVR2A	0.126582	0.687764	0.185654	ACVR2A	0.126582	0.687764	0.185654	ACVR2A	0.126582	0.687764	0.185654
ZNF71	489	236									ZNF71	0.364407	0.59322	0.0423729
BARD1_ENST00000260947	777	235									BARD1_ENST00000260947	0.114894	0.829787	0.0553191
HIST1H3B	136	234					HIST1H3B	0.115385	0.863248	0.0213675	HIST1H3B	0.115385	0.863248	0.0213675
ZNF844	666	234					ZNF844	0.106838	0.871795	0.0213675	ZNF844	0.106838	0.871795	0.0213675
GAA	952	233					GAA	0.386266	0.596567	0.0171674	GAA	0.386266	0.596567	0.0171674
TNRC6B_ENST00000301923	1029	232					TNRC6B_ENST00000301923	0.262931	0.599138	0.137931	TNRC6B_ENST00000301923	0.262931	0.599138	0.137931
TRIM48_ENST00000417545	224	231					TRIM48_ENST00000417545	0.155844	0.835498	0.00865801	TRIM48_ENST00000417545	0.155844	0.835498	0.00865801
NEUROD6	337	231					NEUROD6	0.4329	0.515152	0.0519481	NEUROD6	0.4329	0.515152	0.0519481
FUBP1_ENST00000370768	644	230	FUBP1_ENST00000370768	0.134783	0.691304	0.173913	FUBP1_ENST00000370768	0.134783	0.691304	0.173913	FUBP1_ENST00000370768	0.134783	0.691304	0.173913
NBN	754	230					NBN	0.108696	0.821739	0.0695652	NBN	0.108696	0.821739	0.0695652
ACVR1B_ENST00000541224	546	229	ACVR1B_ENST00000541224	0.104803	0.742358	0.152838	ACVR1B_ENST00000541224	0.104803	0.742358	0.152838	ACVR1B_ENST00000541224	0.104803	0.742358	0.152838
TRIM48	208	228					TRIM48	0.157895	0.837719	0.00438596	TRIM48	0.157895	0.837719	0.00438596
NTRK2_ENST00000304053	553	228									NTRK2_ENST00000304053	0.140351	0.828947	0.0307018
KCNN2	579	228					KCNN2	0.372807	0.578947	0.0482456	KCNN2	0.372807	0.578947	0.0482456
SLC6A18	628	228					SLC6A18	0.385965	0.605263	0.00877193	SLC6A18	0.385965	0.605263	0.00877193
FUBP1_ENST00000436586	665	228	FUBP1_ENST00000436586	0.140351	0.684211	0.175439	FUBP1_ENST00000436586	0.140351	0.684211	0.175439	FUBP1_ENST00000436586	0.140351	0.684211	0.175439
RP11-368J21.2_ENST00000424340	1133	228									RP11-368J21.2_ENST00000424340	0.368421	0.622807	0.00877193
CCAR1	1150	228					CCAR1	0.122807	0.75	0.127193	CCAR1	0.122807	0.75	0.127193
TUBB4	444	227					TUBB4	0.378855	0.585903	0.0352423	TUBB4	0.378855	0.585903	0.0352423
NTNG2	530	227					NTNG2	0.396476	0.585903	0.0176211	NTNG2	0.396476	0.585903	0.0176211
PPM1D	605	227	PPM1D	0.110132	0.594714	0.295154	PPM1D	0.110132	0.594714	0.295154	PPM1D	0.110132	0.594714	0.295154
ZNF92	586	226					ZNF92	0.438053	0.539823	0.0221239	ZNF92	0.438053	0.539823	0.0221239
TRDN	729	226					TRDN	0.0884956	0.823009	0.0884956	TRDN	0.0884956	0.823009	0.0884956
TBL1XR1	514	225					TBL1XR1	0.0933333	0.871111	0.0355556	TBL1XR1	0.0933333	0.871111	0.0355556
KCNC1_ENST00000265969	585	225					KCNC1_ENST00000265969	0.408889	0.591111	0	KCNC1_ENST00000265969	0.408889	0.591111	0
PLK2	685	225					PLK2	0.102222	0.8	0.0977778	PLK2	0.102222	0.8	0.0977778
CYLD	956	224	CYLD	0.183036	0.633929	0.183036	CYLD	0.183036	0.633929	0.183036	CYLD	0.183036	0.633929	0.183036
OR2W3	314	223									OR2W3	0.372197	0.605381	0.0224215
FUBP1_ENST00000370767	655	223	FUBP1_ENST00000370767	0.139013	0.686099	0.174888	FUBP1_ENST00000370767	0.139013	0.686099	0.174888	FUBP1_ENST00000370767	0.139013	0.686099	0.174888
C14orf43	1045	223									C14orf43	0.251121	0.636771	0.112108
MGAT4C_ENST00000393205	507	222									MGAT4C_ENST00000393205	0.148649	0.824324	0.027027
ZNF711_ENST00000373165	761	221									ZNF711_ENST00000373165	0.117647	0.828054	0.0542986
ZNF711	771	221					ZNF711	0.104072	0.841629	0.0542986	ZNF711	0.104072	0.841629	0.0542986
CTNND1	941	221	CTNND1	0.140271	0.710407	0.149321	CTNND1	0.140271	0.710407	0.149321	CTNND1	0.140271	0.710407	0.149321
IGSF21	467	220					IGSF21	0.386364	0.590909	0.0227273	IGSF21	0.386364	0.590909	0.0227273
ZNF418	676	220					ZNF418	0.2	0.681818	0.118182	ZNF418	0.2	0.681818	0.118182
ZNF629	869	220					ZNF629	0.4	0.572727	0.0272727	ZNF629	0.4	0.572727	0.0272727
CTNND1_ENST00000399050	968	220	CTNND1_ENST00000399050	0.131818	0.722727	0.145455	CTNND1_ENST00000399050	0.131818	0.722727	0.145455	CTNND1_ENST00000399050	0.131818	0.722727	0.145455
ABCG8	673	219									ABCG8	0.374429	0.584475	0.0410959
OFD1	1012	218					OFD1	0.151376	0.733945	0.114679	OFD1	0.151376	0.733945	0.114679
KLF4	479	217					KLF4	0.133641	0.857143	0.00921659	KLF4	0.133641	0.857143	0.00921659
NTNG2_ENST00000360670	536	217					NTNG2_ENST00000360670	0.414747	0.56682	0.0184332	NTNG2_ENST00000360670	0.414747	0.56682	0.0184332
SLC45A1	748	217					SLC45A1	0.391705	0.585253	0.0230415	SLC45A1	0.391705	0.585253	0.0230415
KIAA1731_ENST00000411936	2602	217					KIAA1731_ENST00000411936	0.110599	0.797235	0.0921659	KIAA1731_ENST00000411936	0.110599	0.797235	0.0921659
OR2A5	311	216					OR2A5	0.384259	0.606481	0.00925926	OR2A5	0.384259	0.606481	0.00925926
RARA	462	216					RARA	0.125	0.865741	0.00925926	RARA	0.125	0.865741	0.00925926
KCNC1	511	216					KCNC1	0.412037	0.578704	0.00925926	KCNC1	0.412037	0.578704	0.00925926
ZNF135	658	216					ZNF135	0.388889	0.532407	0.0787037	ZNF135	0.388889	0.532407	0.0787037
ZNF135_ENST00000401053	682	216					ZNF135_ENST00000401053	0.384259	0.537037	0.0787037	ZNF135_ENST00000401053	0.384259	0.537037	0.0787037
GNPTAB	1256	216					GNPTAB	0.212963	0.662037	0.125	GNPTAB	0.212963	0.662037	0.125
CNR1	472	215									CNR1	0.344186	0.590698	0.0651163
SP3_ENST00000310015	781	215					SP3_ENST00000310015	0.386047	0.553488	0.0604651	SP3_ENST00000310015	0.386047	0.553488	0.0604651
SMC5	1101	215					SMC5	0.111628	0.748837	0.139535	SMC5	0.111628	0.748837	0.139535
SLC9A3	834	214					SLC9A3	0.38785	0.588785	0.0233645	SLC9A3	0.38785	0.588785	0.0233645
SMAD2_ENST00000591214	431	213	SMAD2_ENST00000591214	0.0751174	0.732394	0.192488	SMAD2_ENST00000591214	0.0751174	0.732394	0.192488	SMAD2_ENST00000591214	0.0751174	0.732394	0.192488
UBC	685	212	UBC	0.509434	0.462264	0.0283019	UBC	0.509434	0.462264	0.0283019	UBC	0.509434	0.462264	0.0283019
KCNG4	519	211					KCNG4	0.398104	0.554502	0.0473934	KCNG4	0.398104	0.554502	0.0473934
RUNX2_ENST00000352853	589	211	RUNX2_ENST00000352853	0.511848	0.440758	0.0473934	RUNX2_ENST00000352853	0.511848	0.440758	0.0473934	RUNX2_ENST00000352853	0.511848	0.440758	0.0473934
LRRC33	692	211									LRRC33	0.369668	0.611374	0.0189573
LIN54	749	211									LIN54	0.36019	0.597156	0.042654
ZNRF3	836	210					ZNRF3	0.209524	0.661905	0.128571	ZNRF3	0.209524	0.661905	0.128571
NF1_ENST00000444181	638	209	NF1_ENST00000444181	0.0861244	0.626794	0.287081	NF1_ENST00000444181	0.0861244	0.626794	0.287081	NF1_ENST00000444181	0.0861244	0.626794	0.287081
DHX16_ENST00000376442	1041	209					DHX16_ENST00000376442	0.229665	0.655502	0.114833	DHX16_ENST00000376442	0.229665	0.655502	0.114833
MAP4K1_ENST00000396857	821	208									MAP4K1_ENST00000396857	0.360577	0.596154	0.0432692
SUPT16H	1047	208									SUPT16H	0.139423	0.822115	0.0384615
B2M	119	207	B2M	0.0628019	0.68599	0.251208	B2M	0.0628019	0.68599	0.251208	B2M	0.0628019	0.68599	0.251208
RUNX2	521	207	RUNX2	0.507246	0.444444	0.0483092	RUNX2	0.507246	0.444444	0.0483092	RUNX2	0.507246	0.444444	0.0483092
TBR1	682	207					TBR1	0.396135	0.57971	0.0241546	TBR1	0.396135	0.57971	0.0241546
OR10G8	311	206					OR10G8	0.38835	0.597087	0.0145631	OR10G8	0.38835	0.597087	0.0145631
SLCO4A1	722	206					SLCO4A1	0.393204	0.597087	0.00970874	SLCO4A1	0.393204	0.597087	0.00970874
SPATA20	802	206									SPATA20	0.364078	0.597087	0.038835
CEP135	1140	206					CEP135	0.106796	0.752427	0.140777	CEP135	0.106796	0.752427	0.140777
TCF7L2_ENST00000352065	459	205	TCF7L2_ENST00000352065	0.097561	0.721951	0.180488	TCF7L2_ENST00000352065	0.097561	0.721951	0.180488	TCF7L2_ENST00000352065	0.097561	0.721951	0.180488
EDIL3	480	205					EDIL3	0.165854	0.707317	0.126829	EDIL3	0.165854	0.707317	0.126829
C17orf70_ENST00000327787	881	204					C17orf70_ENST00000327787	0.387255	0.598039	0.0147059	C17orf70_ENST00000327787	0.387255	0.598039	0.0147059
CES5A_ENST00000521992	604	203									CES5A_ENST00000521992	0.334975	0.586207	0.0788177
RNF111	986	203					RNF111	0.142857	0.729064	0.128079	RNF111	0.142857	0.729064	0.128079
TAOK1_ENST00000261716	1001	203					TAOK1_ENST00000261716	0.152709	0.73399	0.1133	TAOK1_ENST00000261716	0.152709	0.73399	0.1133
CEP290_ENST00000309041	2481	203					CEP290_ENST00000309041	0.0935961	0.817734	0.08867	CEP290_ENST00000309041	0.0935961	0.817734	0.08867
OR4C3	329	202					OR4C3	0.40099	0.574257	0.0247525	OR4C3	0.40099	0.574257	0.0247525
CDK8	464	202	CDK8	0.0891089	0.767327	0.143564	CDK8	0.0891089	0.767327	0.143564	CDK8	0.0891089	0.767327	0.143564
ZNRF3_ENST00000544604	936	202					ZNRF3_ENST00000544604	0.217822	0.653465	0.128713	ZNRF3_ENST00000544604	0.217822	0.653465	0.128713
DHX16	1041	202					DHX16	0.217822	0.663366	0.118812	DHX16	0.217822	0.663366	0.118812
OR1C1	314	201					OR1C1	0.383085	0.59204	0.0248756	OR1C1	0.383085	0.59204	0.0248756
ZNRF4	429	201					ZNRF4	0.393035	0.58209	0.0248756	ZNRF4	0.393035	0.58209	0.0248756
AP1B1	949	201									AP1B1	0.373134	0.606965	0.0199005
MCHR2_ENST00000369212	340	200									MCHR2_ENST00000369212	0.35	0.585	0.065
SUZ12	739	199					SUZ12	0.0753769	0.824121	0.100503	SUZ12	0.0753769	0.824121	0.100503
SLC45A1_ENST00000377479	782	199					SLC45A1_ENST00000377479	0.38191	0.59799	0.0201005	SLC45A1_ENST00000377479	0.38191	0.59799	0.0201005
CLSPN	1339	198					CLSPN	0.166667	0.717172	0.116162	CLSPN	0.166667	0.717172	0.116162
FZD2	565	197					FZD2	0.385787	0.588832	0.0253807	FZD2	0.385787	0.588832	0.0253807
IL12RB1_ENST00000430026	662	197					IL12RB1_ENST00000430026	0.360406	0.57868	0.0609137	IL12RB1_ENST00000430026	0.360406	0.57868	0.0609137
TSGA10	698	197					TSGA10	0.177665	0.695431	0.126904	TSGA10	0.177665	0.695431	0.126904
LRRC8A	810	197					LRRC8A	0.406091	0.563452	0.0304569	LRRC8A	0.406091	0.563452	0.0304569
RNF111_ENST00000434298	1003	197					RNF111_ENST00000434298	0.142132	0.736041	0.121827	RNF111_ENST00000434298	0.142132	0.736041	0.121827
RBM46	533	196	RBM46	0.193878	0.658163	0.147959	RBM46	0.193878	0.658163	0.147959	RBM46	0.193878	0.658163	0.147959
RBM25	843	196									RBM25	0.137755	0.831633	0.0306122
EXOC1	894	196									EXOC1	0.117347	0.821429	0.0612245
EHD3	535	195					EHD3	0.389744	0.579487	0.0307692	EHD3	0.389744	0.579487	0.0307692
FBXO11	843	195									FBXO11	0.138462	0.830769	0.0307692
LUZP1	1076	195					LUZP1	0.194872	0.682051	0.123077	LUZP1	0.194872	0.682051	0.123077
ITGBL1	494	194					ITGBL1	0.128866	0.845361	0.0257732	ITGBL1	0.128866	0.845361	0.0257732
TRIM37	964	194					TRIM37	0.175258	0.701031	0.123711	TRIM37	0.175258	0.701031	0.123711
U2SURP	1029	193					U2SURP	0.119171	0.84456	0.0362694	U2SURP	0.119171	0.84456	0.0362694
HLA-B	362	191	HLA-B	0.125654	0.706806	0.167539	HLA-B	0.125654	0.706806	0.167539	HLA-B	0.125654	0.706806	0.167539
HSPA2	639	191					HSPA2	0.387435	0.60733	0.0052356	HSPA2	0.387435	0.60733	0.0052356
IL12RB1_ENST00000593993	660	191					IL12RB1_ENST00000593993	0.361257	0.570681	0.0680628	IL12RB1_ENST00000593993	0.361257	0.570681	0.0680628
OGT	1036	191					OGT	0.125654	0.853403	0.0209424	OGT	0.125654	0.853403	0.0209424
OR11G2	345	190					OR11G2	0.368421	0.573684	0.0578947	OR11G2	0.368421	0.573684	0.0578947
ZFP36L2	494	190									ZFP36L2	0.115789	0.815789	0.0684211
GP5_ENST00000323007	560	190					GP5_ENST00000323007	0.426316	0.547368	0.0263158	GP5_ENST00000323007	0.426316	0.547368	0.0263158
TROAP	778	190					TROAP	0.115789	0.857895	0.0263158	TROAP	0.115789	0.857895	0.0263158
MALT1_ENST00000348428	824	190					MALT1_ENST00000348428	0.126316	0.757895	0.115789	MALT1_ENST00000348428	0.126316	0.757895	0.115789
GCFC1	917	190					GCFC1	0.184211	0.694737	0.121053	GCFC1	0.184211	0.694737	0.121053
CLSPN_ENST00000251195	1332	190					CLSPN_ENST00000251195	0.157895	0.726316	0.115789	CLSPN_ENST00000251195	0.157895	0.726316	0.115789
OR10G7	311	189									OR10G7	0.375661	0.613757	0.010582
SLC5A2	672	189					SLC5A2	0.375661	0.582011	0.042328	SLC5A2	0.375661	0.582011	0.042328
OGT_ENST00000373719	1046	188					OGT_ENST00000373719	0.132979	0.845745	0.0212766	OGT_ENST00000373719	0.132979	0.845745	0.0212766
SENP6	1112	188					SENP6	0.207447	0.659574	0.132979	SENP6	0.207447	0.659574	0.132979
OR4X2	303	187					OR4X2	0.417112	0.566845	0.0160428	OR4X2	0.417112	0.566845	0.0160428
RARA_ENST00000394081	457	187					RARA_ENST00000394081	0.112299	0.877005	0.0106952	RARA_ENST00000394081	0.112299	0.877005	0.0106952
SLC22A11	550	187									SLC22A11	0.374332	0.59893	0.026738
C17orf70	730	187					C17orf70	0.395722	0.593583	0.0106952	C17orf70	0.395722	0.593583	0.0106952
PCDHB18	734	187	PCDHB18	0.459893	0.518717	0.0213904	PCDHB18	0.459893	0.518717	0.0213904	PCDHB18	0.459893	0.518717	0.0213904
ZNF215	517	186					ZNF215	0.16129	0.725806	0.112903	ZNF215	0.16129	0.725806	0.112903
CFI	583	186					CFI	0.236559	0.634409	0.129032	CFI	0.236559	0.634409	0.129032
GFPT2	682	186					GFPT2	0.397849	0.586022	0.016129	GFPT2	0.397849	0.586022	0.016129
AP1B1_ENST00000415447	939	186					AP1B1_ENST00000415447	0.413978	0.564516	0.0215054	AP1B1_ENST00000415447	0.413978	0.564516	0.0215054
ERCC2_ENST00000485403	405	184	ERCC2_ENST00000485403	0.0652174	0.929348	0.00543478	ERCC2_ENST00000485403	0.0652174	0.929348	0.00543478	ERCC2_ENST00000485403	0.0652174	0.929348	0.00543478
GP5	560	184					GP5	0.434783	0.538043	0.0271739	GP5	0.434783	0.538043	0.0271739
PITRM1_ENST00000451104	939	184									PITRM1_ENST00000451104	0.157609	0.820652	0.0217391
HNF1A_ENST00000543427	403	183					HNF1A_ENST00000543427	0.10929	0.852459	0.0382514	HNF1A_ENST00000543427	0.10929	0.852459	0.0382514
ACVR1B	487	183									ACVR1B	0.114754	0.797814	0.0874317
CPN2	545	183									CPN2	0.360656	0.595628	0.0437158
CLCN7	805	183					CLCN7	0.382514	0.590164	0.0273224	CLCN7	0.382514	0.590164	0.0273224
NTNG2_ENST00000372179	422	182					NTNG2_ENST00000372179	0.43956	0.554945	0.00549451	NTNG2_ENST00000372179	0.43956	0.554945	0.00549451
ANKRD31_ENST00000274361	1873	182					ANKRD31_ENST00000274361	0.10989	0.802198	0.0879121	ANKRD31_ENST00000274361	0.10989	0.802198	0.0879121
CES5A	525	181					CES5A	0.348066	0.563536	0.0883978	CES5A	0.348066	0.563536	0.0883978
BIRC3	604	181					BIRC3	0.0939227	0.812155	0.0939227	BIRC3	0.0939227	0.812155	0.0939227
HDX	690	181									HDX	0.132597	0.823204	0.0441989
KCTD3	815	181					KCTD3	0.160221	0.723757	0.116022	KCTD3	0.160221	0.723757	0.116022
PKD2	968	181					PKD2	0.21547	0.657459	0.127072	PKD2	0.21547	0.657459	0.127072
DRD2_ENST00000355319	445	180									DRD2_ENST00000355319	0.372222	0.622222	0.00555556
KRT15	456	180									KRT15	0.372222	0.605556	0.0222222
GCK_ENST00000395796	464	180									GCK_ENST00000395796	0.372222	0.611111	0.0166667
PRF1	555	180					PRF1	0.383333	0.594444	0.0222222	PRF1	0.383333	0.594444	0.0222222
SLC1A7	560	180					SLC1A7	0.388889	0.6	0.0111111	SLC1A7	0.388889	0.6	0.0111111
SLC6A20_ENST00000358525	592	180					SLC6A20_ENST00000358525	0.394444	0.572222	0.0333333	SLC6A20_ENST00000358525	0.394444	0.572222	0.0333333
NTRK2_ENST00000395882	477	179									NTRK2_ENST00000395882	0.145251	0.826816	0.027933
PAN3_ENST00000380958	887	179					PAN3_ENST00000380958	0.178771	0.703911	0.117318	PAN3_ENST00000380958	0.178771	0.703911	0.117318
CCR4	360	178	CCR4	0.134831	0.421348	0.44382	CCR4	0.134831	0.421348	0.44382	CCR4	0.134831	0.421348	0.44382
SLC20A2	652	178									SLC20A2	0.370787	0.595506	0.0337079
CASD1	797	178									CASD1	0.157303	0.820225	0.0224719
RNF20	975	178					RNF20	0.174157	0.707865	0.117978	RNF20	0.174157	0.707865	0.117978
OR2A2	318	177					OR2A2	0.40678	0.570621	0.0225989	OR2A2	0.40678	0.570621	0.0225989
DMRT3	472	177					DMRT3	0.378531	0.587571	0.0338983	DMRT3	0.378531	0.587571	0.0338983
REL	619	177					REL	0.112994	0.847458	0.039548	REL	0.112994	0.847458	0.039548
ANKMY1_ENST00000361678	717	177									ANKMY1_ENST00000361678	0.350282	0.587571	0.0621469
SENP6_ENST00000447266	1112	177					SENP6_ENST00000447266	0.220339	0.655367	0.124294	SENP6_ENST00000447266	0.220339	0.655367	0.124294
OR9A4	314	176									OR9A4	0.352273	0.596591	0.0511364
PRKACG	351	176					PRKACG	0.409091	0.590909	0	PRKACG	0.409091	0.590909	0
KCNN2_ENST00000512097	441	176					KCNN2_ENST00000512097	0.409091	0.539773	0.0511364	KCNN2_ENST00000512097	0.409091	0.539773	0.0511364
PRAMEF2	474	176									PRAMEF2	0.375	0.590909	0.0340909
MSN	577	176					MSN	0.369318	0.573864	0.0568182	MSN	0.369318	0.573864	0.0568182
PNMAL2_ENST00000599531	635	176									PNMAL2_ENST00000599531	0.369318	0.602273	0.0284091
RNF19A	838	176									RNF19A	0.147727	0.829545	0.0227273
CCDC14_ENST00000488653	953	176					CCDC14_ENST00000488653	0.221591	0.647727	0.130682	CCDC14_ENST00000488653	0.221591	0.647727	0.130682
YES1	543	175					YES1	0.0971429	0.822857	0.08	YES1	0.0971429	0.822857	0.08
ASMTL	621	175									ASMTL	0.371429	0.617143	0.0114286
SGIP1_ENST00000371039	631	175					SGIP1_ENST00000371039	0.114286	0.84	0.0457143	SGIP1_ENST00000371039	0.114286	0.84	0.0457143
TARS	723	175					TARS	0.131429	0.748571	0.12	TARS	0.131429	0.748571	0.12
FH	510	174					FH	0.091954	0.862069	0.045977	FH	0.091954	0.862069	0.045977
ZNF384_ENST00000361959	577	174	ZNF384_ENST00000361959	0.494253	0.477011	0.0287356	ZNF384_ENST00000361959	0.494253	0.477011	0.0287356	ZNF384_ENST00000361959	0.494253	0.477011	0.0287356
CXXC1	656	174					CXXC1	0.132184	0.83908	0.0287356	CXXC1	0.132184	0.83908	0.0287356
HOXD10	340	173	HOXD10	0.531792	0.445087	0.0231214	HOXD10	0.531792	0.445087	0.0231214	HOXD10	0.531792	0.445087	0.0231214
FANCC_ENST00000289081	558	173									FANCC_ENST00000289081	0.138728	0.820809	0.0404624
CHD1L	897	173					CHD1L	0.121387	0.83815	0.0404624	CHD1L	0.121387	0.83815	0.0404624
PKN2	984	173					PKN2	0.104046	0.82659	0.0693642	PKN2	0.104046	0.82659	0.0693642
ZNF14	642	172	ZNF14	0.151163	0.674419	0.174419	ZNF14	0.151163	0.674419	0.174419	ZNF14	0.151163	0.674419	0.174419
OR2A12	310	171					OR2A12	0.380117	0.590643	0.0292398	OR2A12	0.380117	0.590643	0.0292398
HLA-A	365	171	HLA-A	0.122807	0.608187	0.269006	HLA-A	0.122807	0.608187	0.269006	HLA-A	0.122807	0.608187	0.269006
TP73	636	171									TP73	0.333333	0.590643	0.0760234
B2M_ENST00000544417	122	170	B2M_ENST00000544417	0.0941176	0.688235	0.217647	B2M_ENST00000544417	0.0941176	0.688235	0.217647	B2M_ENST00000544417	0.0941176	0.688235	0.217647
PPP6C	305	170					PPP6C	0.0823529	0.794118	0.123529	PPP6C	0.0823529	0.794118	0.123529
DDX4	724	170									DDX4	0.117647	0.782353	0.1
SERPINA4	427	169					SERPINA4	0.343195	0.573964	0.0828402	SERPINA4	0.343195	0.573964	0.0828402
KRT85	507	169					KRT85	0.378698	0.597633	0.0236686	KRT85	0.378698	0.597633	0.0236686
BIN2	565	169					BIN2	0.242604	0.639053	0.118343	BIN2	0.242604	0.639053	0.118343
WAC	647	169									WAC	0.301775	0.585799	0.112426
NFE2L1	772	169									NFE2L1	0.35503	0.585799	0.0591716
ACKR3	362	168									ACKR3	0.369048	0.619048	0.0119048
SLC6A20	555	168					SLC6A20	0.404762	0.559524	0.0357143	SLC6A20	0.404762	0.559524	0.0357143
KLHL5	755	168					KLHL5	0.125	0.845238	0.0297619	KLHL5	0.125	0.845238	0.0297619
RUNX1_ENST00000486278	191	167					RUNX1_ENST00000486278	0.0479042	0.856287	0.0958084	RUNX1_ENST00000486278	0.0479042	0.856287	0.0958084
RAC1	192	167					RAC1	0.101796	0.892216	0.00598802	RAC1	0.101796	0.892216	0.00598802
OR2B11	317	167					OR2B11	0.383234	0.57485	0.0419162	OR2B11	0.383234	0.57485	0.0419162
BPI	487	167									BPI	0.359281	0.586826	0.0538922
MDM2	497	167					MDM2	0.0958084	0.868263	0.0359281	MDM2	0.0958084	0.868263	0.0359281
MAP9	647	167									MAP9	0.143713	0.820359	0.0359281
BRD7	651	167	BRD7	0.179641	0.60479	0.215569	BRD7	0.179641	0.60479	0.215569	BRD7	0.179641	0.60479	0.215569
IWS1	819	167					IWS1	0.167665	0.694611	0.137725	IWS1	0.167665	0.694611	0.137725
FOXI1	378	166					FOXI1	0.385542	0.590361	0.0240964	FOXI1	0.385542	0.590361	0.0240964
SLC28A1_ENST00000537624	636	166									SLC28A1_ENST00000537624	0.361446	0.584337	0.0542169
PPP6C_ENST00000451402	342	165					PPP6C_ENST00000451402	0.0787879	0.8	0.121212	PPP6C_ENST00000451402	0.0787879	0.8	0.121212
RAC1_ENST00000356142	211	164					RAC1_ENST00000356142	0.115854	0.878049	0.00609756	RAC1_ENST00000356142	0.115854	0.878049	0.00609756
NPTX2	431	164					NPTX2	0.390244	0.597561	0.0121951	NPTX2	0.390244	0.597561	0.0121951
DAGLB	672	164					DAGLB	0.384146	0.591463	0.0243902	DAGLB	0.384146	0.591463	0.0243902
IMP5	684	164					IMP5	0.384146	0.609756	0.00609756	IMP5	0.384146	0.609756	0.00609756
TRPV1_ENST00000399756	839	164									TRPV1_ENST00000399756	0.353659	0.597561	0.0487805
MMP13	471	163									MMP13	0.165644	0.822086	0.0122699
KCNQ1	676	163									KCNQ1	0.368098	0.601227	0.0306748
SAMSN1	373	162					SAMSN1	0.179012	0.697531	0.123457	SAMSN1	0.179012	0.697531	0.123457
CCDC102B_ENST00000584156	483	162					CCDC102B_ENST00000584156	0.185185	0.697531	0.117284	CCDC102B_ENST00000584156	0.185185	0.697531	0.117284
PRKCI	596	162					PRKCI	0.0987654	0.851852	0.0493827	PRKCI	0.0987654	0.851852	0.0493827
ASMTL_ENST00000381317	621	162									ASMTL_ENST00000381317	0.37037	0.617284	0.0123457
DDX4_ENST00000505374	724	162									DDX4_ENST00000505374	0.117284	0.783951	0.0987654
OR8B12	310	161					OR8B12	0.378882	0.614907	0.00621118	OR8B12	0.378882	0.614907	0.00621118
PRLHR	370	161					PRLHR	0.416149	0.571429	0.0124224	PRLHR	0.416149	0.571429	0.0124224
SERPINA5	406	161									SERPINA5	0.372671	0.596273	0.0310559
C15orf33	508	161					C15orf33	0.198758	0.670807	0.130435	C15orf33	0.198758	0.670807	0.130435
SPTY2D1	685	161					SPTY2D1	0.192547	0.689441	0.118012	SPTY2D1	0.192547	0.689441	0.118012
PNISR	805	161	PNISR	0.118012	0.73913	0.142857	PNISR	0.118012	0.73913	0.142857	PNISR	0.118012	0.73913	0.142857
MCM6	821	161					MCM6	0.217391	0.664596	0.118012	MCM6	0.217391	0.664596	0.118012
GIGYF2_ENST00000452341	872	161	GIGYF2_ENST00000452341	0.173913	0.614907	0.21118	GIGYF2_ENST00000452341	0.173913	0.614907	0.21118	GIGYF2_ENST00000452341	0.173913	0.614907	0.21118
SENP6_ENST00000370014	1112	161					SENP6_ENST00000370014	0.21118	0.658385	0.130435	SENP6_ENST00000370014	0.21118	0.658385	0.130435
SUFU	484	160									SUFU	0.1375	0.825	0.0375
PAN3	687	160					PAN3	0.19375	0.6875	0.11875	PAN3	0.19375	0.6875	0.11875
TRPV1_ENST00000174621	837	160					TRPV1_ENST00000174621	0.375	0.58125	0.04375	TRPV1_ENST00000174621	0.375	0.58125	0.04375
CFHR3	330	159									CFHR3	0.119497	0.823899	0.0566038
AURKA	403	159					AURKA	0.100629	0.798742	0.100629	AURKA	0.100629	0.798742	0.100629
GSK3B_ENST00000316626	433	159					GSK3B_ENST00000316626	0.100629	0.767296	0.132075	GSK3B_ENST00000316626	0.100629	0.767296	0.132075
SAMSN1_ENST00000285670	441	159					SAMSN1_ENST00000285670	0.188679	0.672956	0.138365	SAMSN1_ENST00000285670	0.188679	0.672956	0.138365
KRI1	709	159									KRI1	0.345912	0.597484	0.0566038
DDX17	729	159									DDX17	0.132075	0.823899	0.0440252
NPEPPS	919	159									NPEPPS	0.352201	0.584906	0.0628931
PHF6	365	158	PHF6	0.0632911	0.626582	0.310127	PHF6	0.0632911	0.626582	0.310127	PHF6	0.0632911	0.626582	0.310127
SYT7	403	158					SYT7	0.386076	0.588608	0.0253165	SYT7	0.386076	0.588608	0.0253165
ZRSR2	482	158	ZRSR2	0.107595	0.727848	0.164557	ZRSR2	0.107595	0.727848	0.164557	ZRSR2	0.107595	0.727848	0.164557
AMIGO3	504	158					AMIGO3	0.392405	0.588608	0.0189873	AMIGO3	0.392405	0.588608	0.0189873
CCDC116	613	158									CCDC116	0.373418	0.620253	0.00632911
NXF1	619	158					NXF1	0.21519	0.670886	0.113924	NXF1	0.21519	0.670886	0.113924
EIF2AK1	630	158					EIF2AK1	0.227848	0.639241	0.132911	EIF2AK1	0.227848	0.639241	0.132911
SLC35F1	408	157					SLC35F1	0.261146	0.617834	0.121019	SLC35F1	0.261146	0.617834	0.121019
MDM4	490	157					MDM4	0.127389	0.834395	0.0382166	MDM4	0.127389	0.834395	0.0382166
MDM2_ENST00000462284	497	157					MDM2_ENST00000462284	0.101911	0.859873	0.0382166	MDM2_ENST00000462284	0.101911	0.859873	0.0382166
C12orf26	603	157									C12orf26	0.11465	0.815287	0.0700637
CENPI	756	157									CENPI	0.165605	0.821656	0.0127389
HOXB3	431	156					HOXB3	0.384615	0.589744	0.025641	HOXB3	0.384615	0.589744	0.025641
PIK3R3	461	156					PIK3R3	0.0705128	0.826923	0.102564	PIK3R3	0.0705128	0.826923	0.102564
SUSD5	629	156					SUSD5	0.314103	0.583333	0.102564	SUSD5	0.314103	0.583333	0.102564
DUSP16	665	156	DUSP16	0.262821	0.487179	0.25	DUSP16	0.262821	0.487179	0.25	DUSP16	0.262821	0.487179	0.25
STAT2	851	156					STAT2	0.307692	0.576923	0.115385	STAT2	0.307692	0.576923	0.115385
STC2	302	155					STC2	0.367742	0.574194	0.0580645	STC2	0.367742	0.574194	0.0580645
GABRD	452	155					GABRD	0.380645	0.619355	0	GABRD	0.380645	0.619355	0
CHEK2_ENST00000382580	586	155					CHEK2_ENST00000382580	0.0580645	0.83871	0.103226	CHEK2_ENST00000382580	0.0580645	0.83871	0.103226
RAD54B	910	155					RAD54B	0.180645	0.683871	0.135484	RAD54B	0.180645	0.683871	0.135484
TMTC3	914	155					TMTC3	0.116129	0.845161	0.0387097	TMTC3	0.116129	0.845161	0.0387097
TAS2R60	318	154									TAS2R60	0.344156	0.590909	0.0649351
FUT1	365	154									FUT1	0.376623	0.603896	0.0194805
ING1_ENST00000375774	422	154					ING1_ENST00000375774	0.188312	0.681818	0.12987	ING1_ENST00000375774	0.188312	0.681818	0.12987
ZNF813	616	154									ZNF813	0.37013	0.61039	0.0194805
TCF12	706	154					TCF12	0.0779221	0.831169	0.0909091	TCF12	0.0779221	0.831169	0.0909091
SLC26A6	759	154									SLC26A6	0.37013	0.61039	0.0194805
CEP95	821	154					CEP95	0.155844	0.707792	0.136364	CEP95	0.155844	0.707792	0.136364
OPRL1	370	153					OPRL1	0.424837	0.568627	0.00653595	OPRL1	0.424837	0.568627	0.00653595
NCK2_ENST00000233154	380	153									NCK2_ENST00000233154	0.372549	0.601307	0.0261438
HOXD3	432	153					HOXD3	0.398693	0.575163	0.0261438	HOXD3	0.398693	0.575163	0.0261438
YAP1_ENST00000282441	504	153					YAP1_ENST00000282441	0.0915033	0.869281	0.0392157	YAP1_ENST00000282441	0.0915033	0.869281	0.0392157
PPP2R3B	575	153	PPP2R3B	0.490196	0.496732	0.0130719	PPP2R3B	0.490196	0.496732	0.0130719	PPP2R3B	0.490196	0.496732	0.0130719
LGR6_ENST00000439764	828	153					LGR6_ENST00000439764	0.372549	0.581699	0.0457516	LGR6_ENST00000439764	0.372549	0.581699	0.0457516
CAPZA3	299	152					CAPZA3	0.190789	0.684211	0.125	CAPZA3	0.190789	0.684211	0.125
B3GALT1	326	152	B3GALT1	0.210526	0.559211	0.230263	B3GALT1	0.210526	0.559211	0.230263	B3GALT1	0.210526	0.559211	0.230263
PPP2R3B_ENST00000390665	575	152	PPP2R3B_ENST00000390665	0.486842	0.5	0.0131579	PPP2R3B_ENST00000390665	0.486842	0.5	0.0131579	PPP2R3B_ENST00000390665	0.486842	0.5	0.0131579
TP73_ENST00000378288	587	152					TP73_ENST00000378288	0.348684	0.572368	0.0789474	TP73_ENST00000378288	0.348684	0.572368	0.0789474
ZFP37_ENST00000553380	645	152									ZFP37_ENST00000553380	0.138158	0.828947	0.0328947
CHUK	745	152					CHUK	0.118421	0.743421	0.138158	CHUK	0.118421	0.743421	0.138158
FGD4	766	152					FGD4	0.197368	0.677632	0.125	FGD4	0.197368	0.677632	0.125
KLHL5_ENST00000359687	770	152					KLHL5_ENST00000359687	0.118421	0.855263	0.0263158	KLHL5_ENST00000359687	0.118421	0.855263	0.0263158
ACTA1	377	151									ACTA1	0.370861	0.615894	0.013245
KIF25	384	151									KIF25	0.337748	0.589404	0.0728477
PRB3	309	150					PRB3	0.0533333	0.906667	0.04	PRB3	0.0533333	0.906667	0.04
GOLGA5_ENST00000163416	731	150					GOLGA5_ENST00000163416	0.126667	0.76	0.113333	GOLGA5_ENST00000163416	0.126667	0.76	0.113333
KLRAQ1	769	150					KLRAQ1	0.233333	0.633333	0.133333	KLRAQ1	0.233333	0.633333	0.133333
OTX2	297	149					OTX2	0.355705	0.577181	0.0671141	OTX2	0.355705	0.577181	0.0671141
PRB3_ENST00000538488	309	149					PRB3_ENST00000538488	0.0671141	0.885906	0.0469799	PRB3_ENST00000538488	0.0671141	0.885906	0.0469799
FOXP2_ENST00000393500	382	149	FOXP2_ENST00000393500	0.563758	0.402685	0.033557	FOXP2_ENST00000393500	0.563758	0.402685	0.033557	FOXP2_ENST00000393500	0.563758	0.402685	0.033557
ZFP2	461	149									ZFP2	0.120805	0.825503	0.0536913
ITPRIP	547	149					ITPRIP	0.38255	0.610738	0.00671141	ITPRIP	0.38255	0.610738	0.00671141
RNF6	685	149	RNF6	0.161074	0.677852	0.161074	RNF6	0.161074	0.677852	0.161074	RNF6	0.161074	0.677852	0.161074
FTSJD1	770	149					FTSJD1	0.147651	0.731544	0.120805	FTSJD1	0.147651	0.731544	0.120805
CEP95_ENST00000556440	821	149					CEP95_ENST00000556440	0.147651	0.711409	0.14094	CEP95_ENST00000556440	0.147651	0.711409	0.14094
PRSS38	326	148					PRSS38	0.378378	0.560811	0.0608108	PRSS38	0.378378	0.560811	0.0608108
BCMO1	547	148									BCMO1	0.358108	0.594595	0.0472973
TBC1D24	553	148					TBC1D24	0.398649	0.560811	0.0405405	TBC1D24	0.398649	0.560811	0.0405405
ZNF276_ENST00000443381	614	148	ZNF276_ENST00000443381	0.209459	0.567568	0.222973	ZNF276_ENST00000443381	0.209459	0.567568	0.222973	ZNF276_ENST00000443381	0.209459	0.567568	0.222973
KLHL5_ENST00000381930	757	148					KLHL5_ENST00000381930	0.121622	0.851351	0.027027	KLHL5_ENST00000381930	0.121622	0.851351	0.027027
MORC4	760	148					MORC4	0.175676	0.695946	0.128378	MORC4	0.175676	0.695946	0.128378
FGF3	239	147									FGF3	0.14966	0.823129	0.0272109
KCNG1_ENST00000396017	275	147					KCNG1_ENST00000396017	0.387755	0.585034	0.0272109	KCNG1_ENST00000396017	0.387755	0.585034	0.0272109
BDKRB2	391	147					BDKRB2	0.37415	0.564626	0.0612245	BDKRB2	0.37415	0.564626	0.0612245
ZNF238	531	147					ZNF238	0.340136	0.564626	0.0952381	ZNF238	0.340136	0.564626	0.0952381
YTHDF3	584	147	YTHDF3	0.585034	0.387755	0.0272109	YTHDF3	0.585034	0.387755	0.0272109	YTHDF3	0.585034	0.387755	0.0272109
IRF2BPL	796	147									IRF2BPL	0.37415	0.62585	0
NAA15	866	147	NAA15	0.115646	0.727891	0.156463	NAA15	0.115646	0.727891	0.156463	NAA15	0.115646	0.727891	0.156463
MTNR1A	350	146					MTNR1A	0.438356	0.527397	0.0342466	MTNR1A	0.438356	0.527397	0.0342466
MAPK1	360	146					MAPK1	0.136986	0.835616	0.0273973	MAPK1	0.136986	0.835616	0.0273973
ZNF224	707	146									ZNF224	0.356164	0.59589	0.0479452
SLC26A6_ENST00000383733	740	146					SLC26A6_ENST00000383733	0.390411	0.582192	0.0273973	SLC26A6_ENST00000383733	0.390411	0.582192	0.0273973
ERBB3_ENST00000411731	183	145					ERBB3_ENST00000411731	0.0758621	0.889655	0.0344828	ERBB3_ENST00000411731	0.0758621	0.889655	0.0344828
SSX5	229	145					SSX5	0.131034	0.868966	0	SSX5	0.131034	0.868966	0
HLA-A_ENST00000376806	371	145	HLA-A_ENST00000376806	0.0896552	0.634483	0.275862	HLA-A_ENST00000376806	0.0896552	0.634483	0.275862	HLA-A_ENST00000376806	0.0896552	0.634483	0.275862
CHRM4	479	145					CHRM4	0.393103	0.572414	0.0344828	CHRM4	0.393103	0.572414	0.0344828
BICC1_ENST00000263103	506	145									BICC1_ENST00000263103	0.137931	0.82069	0.0413793
MSL2	577	145					MSL2	0.434483	0.517241	0.0482759	MSL2	0.434483	0.517241	0.0482759
PPP1R21	780	145					PPP1R21	0.227586	0.641379	0.131034	PPP1R21	0.227586	0.641379	0.131034
TAS2R1	299	144									TAS2R1	0.361111	0.597222	0.0416667
OR10H1	318	144									OR10H1	0.375	0.618056	0.00694444
GPR26	337	144					GPR26	0.381944	0.604167	0.0138889	GPR26	0.381944	0.604167	0.0138889
CX3CR1	355	144					CX3CR1	0.388889	0.583333	0.0277778	CX3CR1	0.388889	0.583333	0.0277778
HAPLN4	402	144					HAPLN4	0.416667	0.555556	0.0277778	HAPLN4	0.416667	0.555556	0.0277778
CHST12	414	144					CHST12	0.409722	0.590278	0	CHST12	0.409722	0.590278	0
KMO	486	144					KMO	0.131944	0.840278	0.0277778	KMO	0.131944	0.840278	0.0277778
NXPE1	547	144					NXPE1	0.118056	0.854167	0.0277778	NXPE1	0.118056	0.854167	0.0277778
ACAP2	778	144					ACAP2	0.208333	0.659722	0.131944	ACAP2	0.208333	0.659722	0.131944
SMAD4_ENST00000452201	177	143	SMAD4_ENST00000452201	0.0629371	0.706294	0.230769	SMAD4_ENST00000452201	0.0629371	0.706294	0.230769	SMAD4_ENST00000452201	0.0629371	0.706294	0.230769
KLK15	256	143									KLK15	0.167832	0.825175	0.00699301
AQP7	342	143									AQP7	0.370629	0.622378	0.00699301
GRPR	384	143					GRPR	0.405594	0.58042	0.013986	GRPR	0.405594	0.58042	0.013986
BTNL3	466	143									BTNL3	0.167832	0.825175	0.00699301
DDX17_ENST00000381633	652	143									DDX17_ENST00000381633	0.125874	0.832168	0.041958
MCMDC2	681	143									MCMDC2	0.111888	0.832168	0.0559441
MCMDC2_ENST00000422365	681	143									MCMDC2_ENST00000422365	0.111888	0.832168	0.0559441
ADAM10	748	143									ADAM10	0.153846	0.825175	0.020979
AHCTF1_ENST00000326225	2275	143					AHCTF1_ENST00000326225	0.174825	0.685315	0.13986	AHCTF1_ENST00000326225	0.174825	0.685315	0.13986
SOX2	317	142									SOX2	0.147887	0.823944	0.028169
TSC1_ENST00000403810	366	142	TSC1_ENST00000403810	0.0985915	0.697183	0.204225	TSC1_ENST00000403810	0.0985915	0.697183	0.204225	TSC1_ENST00000403810	0.0985915	0.697183	0.204225
NCK2	380	142					NCK2	0.380282	0.591549	0.028169	NCK2	0.380282	0.591549	0.028169
CX3CR1_ENST00000358309	387	142									CX3CR1_ENST00000358309	0.373239	0.598592	0.028169
FAM39B	478	142					FAM39B	0.422535	0.570423	0.00704225	FAM39B	0.422535	0.570423	0.00704225
POTEM_ENST00000551509	508	142					POTEM_ENST00000551509	0.140845	0.838028	0.0211268	POTEM_ENST00000551509	0.140845	0.838028	0.0211268
FUS	526	142					FUS	0.380282	0.570423	0.0492958	FUS	0.380282	0.570423	0.0492958
SHQ1	577	142					SHQ1	0.0985915	0.809859	0.0915493	SHQ1	0.0985915	0.809859	0.0915493
ZNF319	582	142					ZNF319	0.43662	0.542254	0.0211268	ZNF319	0.43662	0.542254	0.0211268
RUNX1_ENST00000344691	453	141	RUNX1_ENST00000344691	0.035461	0.879433	0.0851064	RUNX1_ENST00000344691	0.035461	0.879433	0.0851064	RUNX1_ENST00000344691	0.035461	0.879433	0.0851064
ZNF276	539	141	ZNF276	0.22695	0.539007	0.234043	ZNF276	0.22695	0.539007	0.234043	ZNF276	0.22695	0.539007	0.234043
IL1RAP_ENST00000443369	687	141					IL1RAP_ENST00000443369	0.212766	0.673759	0.113475	IL1RAP_ENST00000443369	0.212766	0.673759	0.113475
MAX	160	140					MAX	0.0571429	0.821429	0.121429	MAX	0.0571429	0.821429	0.121429
CD79B	229	140									CD79B	0.114286	0.807143	0.0785714
TMEM130	423	140					TMEM130	0.4	0.571429	0.0285714	TMEM130	0.4	0.571429	0.0285714
ZNF238_ENST00000358704	531	140					ZNF238_ENST00000358704	0.35	0.557143	0.0928571	ZNF238_ENST00000358704	0.35	0.557143	0.0928571
THBD	575	140					THBD	0.392857	0.592857	0.0142857	THBD	0.392857	0.592857	0.0142857
ATF6	670	140					ATF6	0.221429	0.664286	0.114286	ATF6	0.221429	0.664286	0.114286
TCF12_ENST00000452095	702	140					TCF12_ENST00000452095	0.0785714	0.842857	0.0785714	TCF12_ENST00000452095	0.0785714	0.842857	0.0785714
LRRTM2	516	139					LRRTM2	0.402878	0.553957	0.0431655	LRRTM2	0.402878	0.553957	0.0431655
TCF12_ENST00000438423	706	139					TCF12_ENST00000438423	0.0791367	0.834532	0.0863309	TCF12_ENST00000438423	0.0791367	0.834532	0.0863309
CCDC14	793	139					CCDC14	0.23741	0.640288	0.122302	CCDC14	0.23741	0.640288	0.122302
OR5AK2	309	138					OR5AK2	0.405797	0.586957	0.00724638	OR5AK2	0.405797	0.586957	0.00724638
SPATA17	361	138	SPATA17	0.224638	0.630435	0.144928	SPATA17	0.224638	0.630435	0.144928	SPATA17	0.224638	0.630435	0.144928
PRKAR1A	381	138					PRKAR1A	0.166667	0.717391	0.115942	PRKAR1A	0.166667	0.717391	0.115942
KLHL14_ENST00000358095	388	138					KLHL14_ENST00000358095	0.384058	0.572464	0.0434783	KLHL14_ENST00000358095	0.384058	0.572464	0.0434783
CCNE1	410	138					CCNE1	0.108696	0.84058	0.0507246	CCNE1	0.108696	0.84058	0.0507246
MCM7	543	138					MCM7	0.26087	0.623188	0.115942	MCM7	0.26087	0.623188	0.115942
KCNQ1_ENST00000335475	549	138					KCNQ1_ENST00000335475	0.384058	0.57971	0.0362319	KCNQ1_ENST00000335475	0.384058	0.57971	0.0362319
C17orf63	562	138	C17orf63	0.471014	0.485507	0.0434783	C17orf63	0.471014	0.485507	0.0434783	C17orf63	0.471014	0.485507	0.0434783
GP1BA	652	138									GP1BA	0.369565	0.594203	0.0362319
G2E3	706	138					G2E3	0.144928	0.731884	0.123188	G2E3	0.144928	0.731884	0.123188
ARHGAP11A	1023	138									ARHGAP11A	0.115942	0.826087	0.057971
CTSG	255	137									CTSG	0.328467	0.583942	0.0875912
OR1F1	312	137					OR1F1	0.386861	0.605839	0.00729927	OR1F1	0.386861	0.605839	0.00729927
TBXA2R	343	137					TBXA2R	0.394161	0.569343	0.0364964	TBXA2R	0.394161	0.569343	0.0364964
FAM55A	405	137					FAM55A	0.116788	0.854015	0.0291971	FAM55A	0.116788	0.854015	0.0291971
LINC00273	462	137					LINC00273	0.437956	0.547445	0.0145985	LINC00273	0.437956	0.547445	0.0145985
LINC00273_ENST00000539813	462	137					LINC00273_ENST00000539813	0.437956	0.547445	0.0145985	LINC00273_ENST00000539813	0.437956	0.547445	0.0145985
RUNX1_ENST00000325074	468	137	RUNX1_ENST00000325074	0.0364964	0.875912	0.0875912	RUNX1_ENST00000325074	0.0364964	0.875912	0.0875912	RUNX1_ENST00000325074	0.0364964	0.875912	0.0875912
CHEK1	476	137					CHEK1	0.10219	0.854015	0.0437956	CHEK1	0.10219	0.854015	0.0437956
EFHA2	530	137					EFHA2	0.109489	0.766423	0.124088	EFHA2	0.109489	0.766423	0.124088
CPSF6	551	137									CPSF6	0.124088	0.824818	0.0510949
CPSF6_ENST00000435070	551	137									CPSF6_ENST00000435070	0.124088	0.824818	0.0510949
C17orf63_ENST00000341217	562	137	C17orf63_ENST00000341217	0.459854	0.49635	0.0437956	C17orf63_ENST00000341217	0.459854	0.49635	0.0437956	C17orf63_ENST00000341217	0.459854	0.49635	0.0437956
MMP14	582	137					MMP14	0.408759	0.576642	0.0145985	MMP14	0.408759	0.576642	0.0145985
C8orf45	590	137					C8orf45	0.0948905	0.832117	0.0729927	C8orf45	0.0948905	0.832117	0.0729927
NGLY1_ENST00000428257	636	137					NGLY1_ENST00000428257	0.153285	0.722628	0.124088	NGLY1_ENST00000428257	0.153285	0.722628	0.124088
USP45	814	137	USP45	0.138686	0.678832	0.182482	USP45	0.138686	0.678832	0.182482	USP45	0.138686	0.678832	0.182482
MYADM	322	136					MYADM	0.397059	0.602941	0	MYADM	0.397059	0.602941	0
TREML2	380	136									TREML2	0.367647	0.602941	0.0294118
LMX1B_ENST00000355497	406	136					LMX1B_ENST00000355497	0.382353	0.580882	0.0367647	LMX1B_ENST00000355497	0.382353	0.580882	0.0367647
ZBTB26	441	136	ZBTB26	0.514706	0.477941	0.00735294	ZBTB26	0.514706	0.477941	0.00735294	ZBTB26	0.514706	0.477941	0.00735294
DHCR7	475	136					DHCR7	0.397059	0.588235	0.0147059	DHCR7	0.397059	0.588235	0.0147059
SLC2A1	492	136					SLC2A1	0.397059	0.588235	0.0147059	SLC2A1	0.397059	0.588235	0.0147059
SLC7A10	523	136					SLC7A10	0.389706	0.602941	0.00735294	SLC7A10	0.389706	0.602941	0.00735294
NT5C2	561	136					NT5C2	0.139706	0.838235	0.0220588	NT5C2	0.139706	0.838235	0.0220588
DYRK1A_ENST00000338785	584	136	DYRK1A_ENST00000338785	0.132353	0.676471	0.191176	DYRK1A_ENST00000338785	0.132353	0.676471	0.191176	DYRK1A_ENST00000338785	0.132353	0.676471	0.191176
PIAS2	621	136					PIAS2	0.110294	0.867647	0.0220588	PIAS2	0.110294	0.867647	0.0220588
GNE	722	136					GNE	0.139706	0.838235	0.0220588	GNE	0.139706	0.838235	0.0220588
CDKN1A	164	135	CDKN1A	0.103704	0.674074	0.222222	CDKN1A	0.103704	0.674074	0.222222	CDKN1A	0.103704	0.674074	0.222222
OR10H2	315	135					OR10H2	0.407407	0.562963	0.0296296	OR10H2	0.407407	0.562963	0.0296296
KCNK1	336	135					KCNK1	0.340741	0.577778	0.0814815	KCNK1	0.340741	0.577778	0.0814815
LMX1B	372	135					LMX1B	0.385185	0.577778	0.037037	LMX1B	0.385185	0.577778	0.037037
BARHL2	387	135									BARHL2	0.37037	0.614815	0.0148148
ENPP4	453	135									ENPP4	0.140741	0.82963	0.0296296
EHD4	541	135					EHD4	0.377778	0.577778	0.0444444	EHD4	0.377778	0.577778	0.0444444
SYN1_ENST00000295987	705	135									SYN1_ENST00000295987	0.37037	0.607407	0.0222222
OR6M1	313	134					OR6M1	0.395522	0.567164	0.0373134	OR6M1	0.395522	0.567164	0.0373134
EED	441	134					EED	0.104478	0.813433	0.0820896	EED	0.104478	0.813433	0.0820896
HNRNPR	633	134					HNRNPR	0.395522	0.589552	0.0149254	HNRNPR	0.395522	0.589552	0.0149254
HNRPR	633	134					HNRPR	0.395522	0.589552	0.0149254	HNRPR	0.395522	0.589552	0.0149254
GNE_ENST00000396594	753	134					GNE_ENST00000396594	0.141791	0.835821	0.0223881	GNE_ENST00000396594	0.141791	0.835821	0.0223881
CAPN7	813	134									CAPN7	0.126866	0.761194	0.11194
SLC14A1_ENST00000436407	445	133									SLC14A1_ENST00000436407	0.142857	0.827068	0.0300752
CHRDL1	456	133					CHRDL1	0.218045	0.669173	0.112782	CHRDL1	0.218045	0.669173	0.112782
SLC47A1	570	133					SLC47A1	0.390977	0.548872	0.0601504	SLC47A1	0.390977	0.548872	0.0601504
TBX19	448	132					TBX19	0.371212	0.537879	0.0909091	TBX19	0.371212	0.537879	0.0909091
GPR152	470	132					GPR152	0.348485	0.55303	0.0984848	GPR152	0.348485	0.55303	0.0984848
U2AF2	475	132					U2AF2	0.151515	0.840909	0.00757576	U2AF2	0.151515	0.840909	0.00757576
SPNS3	512	132									SPNS3	0.356061	0.590909	0.0530303
OR9G1	305	131									OR9G1	0.328244	0.59542	0.0763359
MYD88_ENST00000417037	317	131					MYD88_ENST00000417037	0.0992366	0.854962	0.0458015	MYD88_ENST00000417037	0.0992366	0.854962	0.0458015
TACR1	407	131					TACR1	0.358779	0.572519	0.0687023	TACR1	0.358779	0.572519	0.0687023
NGFR	427	131									NGFR	0.374046	0.603053	0.0229008
GALNTL5	443	131									GALNTL5	0.129771	0.824427	0.0458015
ZNF730	503	131									ZNF730	0.374046	0.618321	0.00763359
PHACTR2	554	131									PHACTR2	0.137405	0.832061	0.0305344
DHCR7_ENST00000355527	475	130					DHCR7_ENST00000355527	0.4	0.584615	0.0153846	DHCR7_ENST00000355527	0.4	0.584615	0.0153846
PACSIN2	486	130					PACSIN2	0.4	0.530769	0.0692308	PACSIN2	0.4	0.530769	0.0692308
DNAJC11	559	130									DNAJC11	0.323077	0.584615	0.0923077
DDX4_ENST00000511853	575	130									DDX4_ENST00000511853	0.115385	0.8	0.0846154
MAN1A2	641	130	MAN1A2	0.207692	0.638462	0.153846	MAN1A2	0.207692	0.638462	0.153846	MAN1A2	0.207692	0.638462	0.153846
TNFRSF11B	401	129					TNFRSF11B	0.24031	0.643411	0.116279	TNFRSF11B	0.24031	0.643411	0.116279
ANKMY1_ENST00000405523	439	129					ANKMY1_ENST00000405523	0.379845	0.542636	0.0775194	ANKMY1_ENST00000405523	0.379845	0.542636	0.0775194
NCOR1_ENST00000436828	536	129	NCOR1_ENST00000436828	0.0542636	0.75969	0.186047	NCOR1_ENST00000436828	0.0542636	0.75969	0.186047	NCOR1_ENST00000436828	0.0542636	0.75969	0.186047
ZNF441	626	129					ZNF441	0.178295	0.705426	0.116279	ZNF441	0.178295	0.705426	0.116279
TAS2R41	307	128									TAS2R41	0.328125	0.585938	0.0859375
S1PR3	378	128									S1PR3	0.375	0.601562	0.0234375
LMX1B_ENST00000373474	402	128									LMX1B_ENST00000373474	0.375	0.59375	0.03125
SMARCD1	476	128					SMARCD1	0.125	0.742188	0.132812	SMARCD1	0.125	0.742188	0.132812
RBPJ	486	128					RBPJ	0.257812	0.609375	0.132812	RBPJ	0.257812	0.609375	0.132812
TRIM50	487	128					TRIM50	0.414062	0.554688	0.03125	TRIM50	0.414062	0.554688	0.03125
SLC41A1	513	128									SLC41A1	0.367188	0.585938	0.046875
ACRBP	543	128					ACRBP	0.335938	0.578125	0.0859375	ACRBP	0.335938	0.578125	0.0859375
USO1_ENST00000538159	971	128									USO1_ENST00000538159	0.117188	0.8125	0.0703125
FCN2	313	127									FCN2	0.370079	0.614173	0.015748
PHF6_ENST00000332070	365	127	PHF6_ENST00000332070	0.0787402	0.637795	0.283465	PHF6_ENST00000332070	0.0787402	0.637795	0.283465	PHF6_ENST00000332070	0.0787402	0.637795	0.283465
MFAP3L	409	127					MFAP3L	0.417323	0.566929	0.015748	MFAP3L	0.417323	0.566929	0.015748
C15orf27	531	127					C15orf27	0.393701	0.598425	0.00787402	C15orf27	0.393701	0.598425	0.00787402
VPS53	670	127					VPS53	0.19685	0.685039	0.11811	VPS53	0.19685	0.685039	0.11811
PREPL	727	127					PREPL	0.11811	0.850394	0.0314961	PREPL	0.11811	0.850394	0.0314961
AGBL3	920	127	AGBL3	0.0944882	0.732283	0.173228	AGBL3	0.0944882	0.732283	0.173228	AGBL3	0.0944882	0.732283	0.173228
EIF1AX	144	126	EIF1AX	0.0396825	0.928571	0.031746	EIF1AX	0.0396825	0.928571	0.031746	EIF1AX	0.0396825	0.928571	0.031746
ING1	279	126	ING1	0.206349	0.626984	0.166667	ING1	0.206349	0.626984	0.166667	ING1	0.206349	0.626984	0.166667
CCR7	378	126	CCR7	0.214286	0.492063	0.293651	CCR7	0.214286	0.492063	0.293651	CCR7	0.214286	0.492063	0.293651
NXN	435	126					NXN	0.380952	0.587302	0.031746	NXN	0.380952	0.587302	0.031746
SNX8	465	126					SNX8	0.396825	0.571429	0.031746	SNX8	0.396825	0.571429	0.031746
NONO	471	126					NONO	0.103175	0.825397	0.0714286	NONO	0.103175	0.825397	0.0714286
TRIM50_ENST00000333149	487	126					TRIM50_ENST00000333149	0.412698	0.555556	0.031746	TRIM50_ENST00000333149	0.412698	0.555556	0.031746
FUS_ENST00000254108	526	126					FUS_ENST00000254108	0.388889	0.555556	0.0555556	FUS_ENST00000254108	0.388889	0.555556	0.0555556
UGT2B17	530	126					UGT2B17	0.206349	0.674603	0.119048	UGT2B17	0.206349	0.674603	0.119048
GPR108	543	126					GPR108	0.388889	0.563492	0.047619	GPR108	0.388889	0.563492	0.047619
IRGQ	623	126					IRGQ	0.373016	0.571429	0.0555556	IRGQ	0.373016	0.571429	0.0555556
EEF1D_ENST00000423316	647	126					EEF1D_ENST00000423316	0.404762	0.587302	0.00793651	EEF1D_ENST00000423316	0.404762	0.587302	0.00793651
CBFB_ENST00000412916	187	125	CBFB_ENST00000412916	0.08	0.688	0.232	CBFB_ENST00000412916	0.08	0.688	0.232	CBFB_ENST00000412916	0.08	0.688	0.232
KLHDC8A	350	125									KLHDC8A	0.376	0.584	0.04
OTX1	354	125									OTX1	0.368	0.608	0.024
DDO	369	125									DDO	0.304	0.592	0.104
HSD3B1	373	125									HSD3B1	0.36	0.584	0.056
TNFRSF11B_ENST00000297350	401	125									TNFRSF11B_ENST00000297350	0.24	0.648	0.112
CFP	469	125									CFP	0.184	0.704	0.112
DFNA5	496	125									DFNA5	0.36	0.584	0.056
CYP27A1	531	125					CYP27A1	0.416	0.56	0.024	CYP27A1	0.416	0.56	0.024
EIF2AK1_ENST00000536084	577	125	EIF2AK1_ENST00000536084	0.224	0.616	0.16	EIF2AK1_ENST00000536084	0.224	0.616	0.16	EIF2AK1_ENST00000536084	0.224	0.616	0.16
MCMDC2_ENST00000313616	632	125									MCMDC2_ENST00000313616	0.12	0.824	0.056
RARS	660	125									RARS	0.176	0.712	0.112
LRRFIP2	721	125									LRRFIP2	0.184	0.704	0.112
CDKN1A_ENST00000448526	198	124	CDKN1A_ENST00000448526	0.120968	0.669355	0.209677	CDKN1A_ENST00000448526	0.120968	0.669355	0.209677	CDKN1A_ENST00000448526	0.120968	0.669355	0.209677
PGC	388	124									PGC	0.370968	0.596774	0.0322581
PPHLN1_ENST00000432191	434	124									PPHLN1_ENST00000432191	0.129032	0.830645	0.0403226
NFIX	441	124									NFIX	0.346774	0.596774	0.0564516
YAP1	450	124					YAP1	0.0887097	0.862903	0.0483871	YAP1	0.0887097	0.862903	0.0483871
BTBD17	478	124									BTBD17	0.370968	0.620968	0.00806452
PSPC1	523	124									PSPC1	0.112903	0.822581	0.0645161
EEF1D	647	124					EEF1D	0.387097	0.604839	0.00806452	EEF1D	0.387097	0.604839	0.00806452
ZNF853	659	124					ZNF853	0.241935	0.637097	0.120968	ZNF853	0.241935	0.637097	0.120968
ZNF853_ENST00000457543	659	124					ZNF853_ENST00000457543	0.241935	0.637097	0.120968	ZNF853_ENST00000457543	0.241935	0.637097	0.120968
FDXACB1	843	124									FDXACB1	0.322581	0.58871	0.0887097
TGIF2LX	241	123									TGIF2LX	0.357724	0.585366	0.0569106
OR6C65	312	123									OR6C65	0.373984	0.601626	0.0243902
ANKRD33	452	123									ANKRD33	0.349593	0.593496	0.0569106
FOXD4	494	123					FOXD4	0.390244	0.585366	0.0243902	FOXD4	0.390244	0.585366	0.0243902
ZNF548_ENST00000336128	545	123					ZNF548_ENST00000336128	0.268293	0.601626	0.130081	ZNF548_ENST00000336128	0.268293	0.601626	0.130081
IGF1_ENST00000307046	195	122					IGF1_ENST00000307046	0.122951	0.844262	0.0327869	IGF1_ENST00000307046	0.122951	0.844262	0.0327869
SLC25A6	298	122					SLC25A6	0.409836	0.54918	0.0409836	SLC25A6	0.409836	0.54918	0.0409836
ADRA1A_ENST00000358857	324	122					ADRA1A_ENST00000358857	0.368852	0.581967	0.0491803	ADRA1A_ENST00000358857	0.368852	0.581967	0.0491803
GATA1_ENST00000376665	334	122					GATA1_ENST00000376665	0.122951	0.860656	0.0163934	GATA1_ENST00000376665	0.122951	0.860656	0.0163934
GPR77	337	122					GPR77	0.385246	0.598361	0.0163934	GPR77	0.385246	0.598361	0.0163934
RBM4	364	122					RBM4	0.401639	0.590164	0.00819672	RBM4	0.401639	0.590164	0.00819672
LCOR	433	122					LCOR	0.442623	0.532787	0.0245902	LCOR	0.442623	0.532787	0.0245902
NFIX_ENST00000360105	441	122									NFIX_ENST00000360105	0.352459	0.590164	0.057377
RTN4RL1	441	122									RTN4RL1	0.377049	0.598361	0.0245902
PIAS2_ENST00000324794	572	122					PIAS2_ENST00000324794	0.139344	0.836066	0.0245902	PIAS2_ENST00000324794	0.139344	0.836066	0.0245902
WDR20	581	122									WDR20	0.336066	0.590164	0.0737705
BIN1	593	122					BIN1	0.360656	0.581967	0.057377	BIN1	0.360656	0.581967	0.057377
CCDC41	701	122	CCDC41	0.147541	0.680328	0.172131	CCDC41	0.147541	0.680328	0.172131	CCDC41	0.147541	0.680328	0.172131
ANKRD56	793	122					ANKRD56	0.139344	0.836066	0.0245902	ANKRD56	0.139344	0.836066	0.0245902
CHD1L_ENST00000369258	897	122					CHD1L_ENST00000369258	0.106557	0.852459	0.0409836	CHD1L_ENST00000369258	0.106557	0.852459	0.0409836
CCDC35	972	122									CCDC35	0.147541	0.827869	0.0245902
FBRS_ENST00000356166	980	122					FBRS_ENST00000356166	0.368852	0.57377	0.057377	FBRS_ENST00000356166	0.368852	0.57377	0.057377
VWC2L	222	121									VWC2L	0.140496	0.826446	0.0330579
KRTAP5-4	228	121					KRTAP5-4	0.429752	0.570248	0	KRTAP5-4	0.429752	0.570248	0
CCND3	292	121					CCND3	0.157025	0.702479	0.140496	CCND3	0.157025	0.702479	0.140496
CACNG2	323	121	CACNG2	0.438017	0.495868	0.0661157	CACNG2	0.438017	0.495868	0.0661157	CACNG2	0.438017	0.495868	0.0661157
SELL_ENST00000236147	385	121									SELL_ENST00000236147	0.31405	0.595041	0.0909091
ANGPTL2	493	121					ANGPTL2	0.363636	0.553719	0.0826446	ANGPTL2	0.363636	0.553719	0.0826446
RIOK3	519	121									RIOK3	0.165289	0.826446	0.00826446
KPNA5	539	121									KPNA5	0.132231	0.826446	0.0413223
ZNF136	540	121					ZNF136	0.132231	0.743802	0.123967	ZNF136	0.132231	0.743802	0.123967
AFP	609	121									AFP	0.14876	0.826446	0.0247934
MARCH7	704	121									MARCH7	0.115702	0.818182	0.0661157
CCDC66_ENST00000394672	948	121	CCDC66_ENST00000394672	0.107438	0.735537	0.157025	CCDC66_ENST00000394672	0.107438	0.735537	0.157025	CCDC66_ENST00000394672	0.107438	0.735537	0.157025
MGAM	326	120					MGAM	0.175	0.708333	0.116667	MGAM	0.175	0.708333	0.116667
ADRA1A_ENST00000380572	342	120									ADRA1A_ENST00000380572	0.366667	0.591667	0.0416667
CSNK2A1	391	120	CSNK2A1	0.141667	0.675	0.183333	CSNK2A1	0.141667	0.675	0.183333	CSNK2A1	0.141667	0.675	0.183333
GJA3	435	120					GJA3	0.408333	0.533333	0.0583333	GJA3	0.408333	0.533333	0.0583333
HNRNPK	464	120					HNRNPK	0.125	0.841667	0.0333333	HNRNPK	0.125	0.841667	0.0333333
UPF3B	483	120	UPF3B	0.0916667	0.766667	0.141667	UPF3B	0.0916667	0.766667	0.141667	UPF3B	0.0916667	0.766667	0.141667
CETP	493	120					CETP	0.4	0.55	0.05	CETP	0.4	0.55	0.05
KRT82	513	120					KRT82	0.375	0.583333	0.0416667	KRT82	0.375	0.583333	0.0416667
FAM126A	521	120					FAM126A	0.183333	0.691667	0.125	FAM126A	0.183333	0.691667	0.125
RTKN2_ENST00000395265	527	120	RTKN2_ENST00000395265	0.233333	0.625	0.141667	RTKN2_ENST00000395265	0.233333	0.625	0.141667	RTKN2_ENST00000395265	0.233333	0.625	0.141667
KLHL7	564	120									KLHL7	0.125	0.825	0.05
PTPRU_ENST00000323874	1442	120									PTPRU_ENST00000323874	0.175	0.825	0
SEC14L4	406	119									SEC14L4	0.369748	0.596639	0.0336134
SBK1_ENST00000341901	424	119					SBK1_ENST00000341901	0.411765	0.563025	0.0252101	SBK1_ENST00000341901	0.411765	0.563025	0.0252101
RBPJ_ENST00000348160	487	119	RBPJ_ENST00000348160	0.260504	0.596639	0.142857	RBPJ_ENST00000348160	0.260504	0.596639	0.142857	RBPJ_ENST00000348160	0.260504	0.596639	0.142857
ANKRD34C	535	119									ANKRD34C	0.327731	0.596639	0.0756303
RBBP5	538	119	RBBP5	0.193277	0.655462	0.151261	RBBP5	0.193277	0.655462	0.151261	RBBP5	0.193277	0.655462	0.151261
XRCC6	609	119									XRCC6	0.151261	0.823529	0.0252101
ENSG00000198064	834	119					ENSG00000198064	0.386555	0.613445	0	ENSG00000198064	0.386555	0.613445	0
AGTPBP1_ENST00000376109	1238	119					AGTPBP1_ENST00000376109	0.0840336	0.823529	0.092437	AGTPBP1_ENST00000376109	0.0840336	0.823529	0.092437
CRP	224	118					CRP	0.440678	0.550847	0.00847458	CRP	0.440678	0.550847	0.00847458
PNCK_ENST00000447676	426	118					PNCK_ENST00000447676	0.389831	0.576271	0.0338983	PNCK_ENST00000447676	0.389831	0.576271	0.0338983
FBXW2_ENST00000373926	454	118	FBXW2_ENST00000373926	0.466102	0.516949	0.0169492	FBXW2_ENST00000373926	0.466102	0.516949	0.0169492	FBXW2_ENST00000373926	0.466102	0.516949	0.0169492
TMEM161B	487	118									TMEM161B	0.152542	0.822034	0.0254237
RIOK2	552	118					RIOK2	0.110169	0.805085	0.0847458	RIOK2	0.110169	0.805085	0.0847458
DENND1A_ENST00000373620	559	118									DENND1A_ENST00000373620	0.372881	0.584746	0.0423729
MPP5	675	118					MPP5	0.177966	0.70339	0.118644	MPP5	0.177966	0.70339	0.118644
NDUFS1	727	118					NDUFS1	0.110169	0.847458	0.0423729	NDUFS1	0.110169	0.847458	0.0423729
OR2T34	318	117					OR2T34	0.384615	0.589744	0.025641	OR2T34	0.384615	0.589744	0.025641
KCNK3	394	117					KCNK3	0.384615	0.589744	0.025641	KCNK3	0.384615	0.589744	0.025641
VIPAR	493	117					VIPAR	0.316239	0.581197	0.102564	VIPAR	0.316239	0.581197	0.102564
TRIM22	498	117	TRIM22	0.230769	0.623932	0.145299	TRIM22	0.230769	0.623932	0.145299	TRIM22	0.230769	0.623932	0.145299
BTN3A1	513	117					BTN3A1	0.384615	0.57265	0.042735	BTN3A1	0.384615	0.57265	0.042735
FBXO7	522	117									FBXO7	0.350427	0.589744	0.0598291
CCT7_ENST00000258091	543	117					CCT7_ENST00000258091	0.393162	0.555556	0.0512821	CCT7_ENST00000258091	0.393162	0.555556	0.0512821
CCDC66	831	117	CCDC66	0.111111	0.709402	0.179487	CCDC66	0.111111	0.709402	0.179487	CCDC66	0.111111	0.709402	0.179487
DHRS2_ENST00000344777	300	116									DHRS2_ENST00000344777	0.362069	0.586207	0.0517241
LRRC52	313	116									LRRC52	0.344828	0.586207	0.0689655
LUZP4	313	116					LUZP4	0.0948276	0.818966	0.0862069	LUZP4	0.0948276	0.818966	0.0862069
SOX1	391	116	SOX1	0.456897	0.543103	0	SOX1	0.456897	0.543103	0	SOX1	0.456897	0.543103	0
OPRM1_ENST00000414028	403	116					OPRM1_ENST00000414028	0.353448	0.577586	0.0689655	OPRM1_ENST00000414028	0.353448	0.577586	0.0689655
HCRTR1	425	116					HCRTR1	0.387931	0.577586	0.0344828	HCRTR1	0.387931	0.577586	0.0344828
DUX4L1	485	116	DUX4L1	0	0.982759	0.0172414					DUX4L1	0	0.982759	0.0172414
PIK3R3_ENST00000540385	507	116	PIK3R3_ENST00000540385	0.0775862	0.775862	0.146552	PIK3R3_ENST00000540385	0.0775862	0.775862	0.146552	PIK3R3_ENST00000540385	0.0775862	0.775862	0.146552
FBXO7_ENST00000266087	522	116									FBXO7_ENST00000266087	0.353448	0.586207	0.0603448
AGBL3_ENST00000458078	975	116	AGBL3_ENST00000458078	0.103448	0.724138	0.172414	AGBL3_ENST00000458078	0.103448	0.724138	0.172414	AGBL3_ENST00000458078	0.103448	0.724138	0.172414
CBFB_ENST00000290858	182	115	CBFB_ENST00000290858	0.0956522	0.678261	0.226087	CBFB_ENST00000290858	0.0956522	0.678261	0.226087	CBFB_ENST00000290858	0.0956522	0.678261	0.226087
ING1_ENST00000338450	235	115	ING1_ENST00000338450	0.2	0.617391	0.182609	ING1_ENST00000338450	0.2	0.617391	0.182609	ING1_ENST00000338450	0.2	0.617391	0.182609
TBP	339	115	TBP	0.573913	0.417391	0.00869565	TBP	0.573913	0.417391	0.00869565	TBP	0.573913	0.417391	0.00869565
VSIG1_ENST00000415430	423	115									VSIG1_ENST00000415430	0.373913	0.6	0.026087
SMARCD2	475	115	SMARCD2	0.173913	0.626087	0.2	SMARCD2	0.173913	0.626087	0.2	SMARCD2	0.173913	0.626087	0.2
UPF3A	476	115					UPF3A	0.382609	0.582609	0.0347826	UPF3A	0.382609	0.582609	0.0347826
STIP1	543	115					STIP1	0.165217	0.721739	0.113043	STIP1	0.165217	0.721739	0.113043
CAPS2_ENST00000409445	557	115									CAPS2_ENST00000409445	0.113043	0.817391	0.0695652
PLBD2	589	115					PLBD2	0.382609	0.556522	0.0608696	PLBD2	0.382609	0.556522	0.0608696
ARID5A	594	115									ARID5A	0.356522	0.591304	0.0521739
CDC23	597	115					CDC23	0.156522	0.834783	0.00869565	CDC23	0.156522	0.834783	0.00869565
SASS6	657	115					SASS6	0.191304	0.695652	0.113043	SASS6	0.191304	0.695652	0.113043
FEM1A	669	115					FEM1A	0.373913	0.573913	0.0521739	FEM1A	0.373913	0.573913	0.0521739
GPSM2	684	115									GPSM2	0.113043	0.808696	0.0782609
MAX_ENST00000284165	134	114	MAX_ENST00000284165	0.0263158	0.850877	0.122807	MAX_ENST00000284165	0.0263158	0.850877	0.122807	MAX_ENST00000284165	0.0263158	0.850877	0.122807
TMEM79	394	114					TMEM79	0.412281	0.561404	0.0263158	TMEM79	0.412281	0.561404	0.0263158
PRR5-ARHGAP8	469	114									PRR5-ARHGAP8	0.368421	0.596491	0.0350877
ENG	625	114					ENG	0.412281	0.535088	0.0526316	ENG	0.412281	0.535088	0.0526316
TAP2_ENST00000374897	686	114					TAP2_ENST00000374897	0.22807	0.640351	0.131579	TAP2_ENST00000374897	0.22807	0.640351	0.131579
CCDC66_ENST00000436465	948	114	CCDC66_ENST00000436465	0.105263	0.72807	0.166667	CCDC66_ENST00000436465	0.105263	0.72807	0.166667	CCDC66_ENST00000436465	0.105263	0.72807	0.166667
PLUNC	256	113					PLUNC	0.39823	0.566372	0.0353982	PLUNC	0.39823	0.566372	0.0353982
PNCK_ENST00000393831	366	113					PNCK_ENST00000393831	0.415929	0.575221	0.00884956	PNCK_ENST00000393831	0.415929	0.575221	0.00884956
LUC7L2	392	113	LUC7L2	0.106195	0.716814	0.176991	LUC7L2	0.106195	0.716814	0.176991	LUC7L2	0.106195	0.716814	0.176991
HS3ST3A1	406	113					HS3ST3A1	0.380531	0.610619	0.00884956	HS3ST3A1	0.380531	0.610619	0.00884956
RSL1D1	490	113					RSL1D1	0.106195	0.867257	0.0265487	RSL1D1	0.106195	0.867257	0.0265487
HKR1_ENST00000392153	640	113									HKR1_ENST00000392153	0.336283	0.584071	0.079646
MTMR2_ENST00000346299	643	113	MTMR2_ENST00000346299	0.238938	0.60177	0.159292	MTMR2_ENST00000346299	0.238938	0.60177	0.159292	MTMR2_ENST00000346299	0.238938	0.60177	0.159292
TMEM232_ENST00000455884	657	113					TMEM232_ENST00000455884	0.159292	0.707965	0.132743	TMEM232_ENST00000455884	0.159292	0.707965	0.132743
ENG_ENST00000373203	658	113					ENG_ENST00000373203	0.389381	0.557522	0.0530973	ENG_ENST00000373203	0.389381	0.557522	0.0530973
NAA35	725	113					NAA35	0.106195	0.823009	0.0707965	NAA35	0.106195	0.823009	0.0707965
LHFPL3	236	112					LHFPL3	0.428571	0.526786	0.0446429	LHFPL3	0.428571	0.526786	0.0446429
PRR5_ENST00000403581	411	112					PRR5_ENST00000403581	0.366071	0.5625	0.0714286	PRR5_ENST00000403581	0.366071	0.5625	0.0714286
CDCA7L	454	112					CDCA7L	0.133929	0.732143	0.133929	CDCA7L	0.133929	0.732143	0.133929
G3BP2	482	112									G3BP2	0.125	0.830357	0.0446429
PNKP	521	112					PNKP	0.383929	0.571429	0.0446429	PNKP	0.383929	0.571429	0.0446429
TJAP1	547	112									TJAP1	0.169643	0.821429	0.00892857
RPN2	631	112					RPN2	0.383929	0.544643	0.0714286	RPN2	0.383929	0.544643	0.0714286
ZNF23	643	112					ZNF23	0.232143	0.651786	0.116071	ZNF23	0.232143	0.651786	0.116071
GJB4	266	111					GJB4	0.405405	0.585586	0.00900901	GJB4	0.405405	0.585586	0.00900901
SLC13A3_ENST00000372121	338	111	SLC13A3_ENST00000372121	0.396396	0.504505	0.0990991	SLC13A3_ENST00000372121	0.396396	0.504505	0.0990991	SLC13A3_ENST00000372121	0.396396	0.504505	0.0990991
HNRNPA2B1	341	111					HNRNPA2B1	0.0990991	0.828829	0.0720721	HNRNPA2B1	0.0990991	0.828829	0.0720721
HNRNPA2B1_ENST00000354667	353	111					HNRNPA2B1_ENST00000354667	0.0990991	0.828829	0.0720721	HNRNPA2B1_ENST00000354667	0.0990991	0.828829	0.0720721
WNT5B_ENST00000397196	359	111					WNT5B_ENST00000397196	0.369369	0.576577	0.0540541	WNT5B_ENST00000397196	0.369369	0.576577	0.0540541
SARDH_ENST00000371868	368	111					SARDH_ENST00000371868	0.396396	0.585586	0.018018	SARDH_ENST00000371868	0.396396	0.585586	0.018018
IL12RB1	381	111					IL12RB1	0.369369	0.54955	0.0810811	IL12RB1	0.369369	0.54955	0.0810811
MESP2	397	111					MESP2	0.405405	0.585586	0.00900901	MESP2	0.405405	0.585586	0.00900901
OPRM1_ENST00000419506	420	111									OPRM1_ENST00000419506	0.324324	0.594595	0.0810811
KCNN4	427	111					KCNN4	0.378378	0.585586	0.036036	KCNN4	0.378378	0.585586	0.036036
RSRC2	434	111					RSRC2	0.135135	0.738739	0.126126	RSRC2	0.135135	0.738739	0.126126
GTF2E1	439	111									GTF2E1	0.144144	0.828829	0.027027
NARFL	476	111					NARFL	0.423423	0.540541	0.036036	NARFL	0.423423	0.540541	0.036036
SLC16A12_ENST00000371790	516	111					SLC16A12_ENST00000371790	0.369369	0.576577	0.0540541	SLC16A12_ENST00000371790	0.369369	0.576577	0.0540541
PNKP_ENST00000322344	521	111					PNKP_ENST00000322344	0.387387	0.567568	0.045045	PNKP_ENST00000322344	0.387387	0.567568	0.045045
PSIP1_ENST00000380733	530	111	PSIP1_ENST00000380733	0.162162	0.648649	0.189189	PSIP1_ENST00000380733	0.162162	0.648649	0.189189	PSIP1_ENST00000380733	0.162162	0.648649	0.189189
CCDC82	544	111	CCDC82	0.171171	0.684685	0.144144	CCDC82	0.171171	0.684685	0.144144	CCDC82	0.171171	0.684685	0.144144
RP3-402G11_5	669	111					RP3-402G11_5	0.387387	0.576577	0.036036	RP3-402G11_5	0.387387	0.576577	0.036036
AGAP6	686	111									AGAP6	0.117117	0.81982	0.0630631
CDKN1B	198	110	CDKN1B	0.0909091	0.554545	0.354545	CDKN1B	0.0909091	0.554545	0.354545	CDKN1B	0.0909091	0.554545	0.354545
OR4D1	310	110					OR4D1	0.409091	0.536364	0.0545455	OR4D1	0.409091	0.536364	0.0545455
FAS	335	110					FAS	0.190909	0.672727	0.136364	FAS	0.190909	0.672727	0.136364
RTDR1	348	110					RTDR1	0.409091	0.563636	0.0272727	RTDR1	0.409091	0.563636	0.0272727
PRKAR1B	381	110									PRKAR1B	0.372727	0.590909	0.0363636
KCNJ11	390	110					KCNJ11	0.390909	0.590909	0.0181818	KCNJ11	0.390909	0.590909	0.0181818
MYCL1_ENST00000397332	394	110					MYCL1_ENST00000397332	0.109091	0.818182	0.0727273	MYCL1_ENST00000397332	0.109091	0.818182	0.0727273
NSUN6	469	110	NSUN6	0.154545	0.681818	0.163636	NSUN6	0.154545	0.681818	0.163636	NSUN6	0.154545	0.681818	0.163636
PAOX_ENST00000357296	486	110									PAOX_ENST00000357296	0.372727	0.6	0.0272727
ZNF517	492	110					ZNF517	0.4	0.6	0	ZNF517	0.4	0.6	0
TXLNA	546	110					TXLNA	0.118182	0.872727	0.00909091	TXLNA	0.118182	0.872727	0.00909091
CDKAL1	579	110									CDKAL1	0.154545	0.827273	0.0181818
RIT1	219	109					RIT1	0.0917431	0.853211	0.0550459	RIT1	0.0917431	0.853211	0.0550459
OR2C1	312	109					OR2C1	0.385321	0.605505	0.00917431	OR2C1	0.385321	0.605505	0.00917431
SS18L1_ENST00000331758	396	109					SS18L1_ENST00000331758	0.366972	0.577982	0.0550459	SS18L1_ENST00000331758	0.366972	0.577982	0.0550459
SAG_ENST00000409110	405	109					SAG_ENST00000409110	0.137615	0.834862	0.0275229	SAG_ENST00000409110	0.137615	0.834862	0.0275229
GTPBP5	406	109					GTPBP5	0.40367	0.568807	0.0275229	GTPBP5	0.40367	0.568807	0.0275229
AP1M1	423	109									AP1M1	0.376147	0.605505	0.0183486
PSEN2	448	109					PSEN2	0.385321	0.59633	0.0183486	PSEN2	0.385321	0.59633	0.0183486
TCF25_ENST00000263347	473	109					TCF25_ENST00000263347	0.302752	0.577982	0.119266	TCF25_ENST00000263347	0.302752	0.577982	0.119266
EGR4	486	109					EGR4	0.394495	0.577982	0.0275229	EGR4	0.394495	0.577982	0.0275229
MBOAT1	495	109									MBOAT1	0.293578	0.59633	0.110092
ADRA1B	520	109					ADRA1B	0.422018	0.577982	0	ADRA1B	0.422018	0.577982	0
CACNB1	523	109					CACNB1	0.385321	0.559633	0.0550459	CACNB1	0.385321	0.559633	0.0550459
SSX2IP_ENST00000370612	560	109									SSX2IP_ENST00000370612	0.119266	0.816514	0.0642202
TRIM23	574	109					TRIM23	0.12844	0.834862	0.0366972	TRIM23	0.12844	0.834862	0.0366972
WDR20_ENST00000454394	600	109					WDR20_ENST00000454394	0.357798	0.577982	0.0642202	WDR20_ENST00000454394	0.357798	0.577982	0.0642202
ZNF354B	612	109					ZNF354B	0.12844	0.834862	0.0366972	ZNF354B	0.12844	0.834862	0.0366972
PARN	639	109					PARN	0.110092	0.834862	0.0550459	PARN	0.110092	0.834862	0.0550459
TXNRD1_ENST00000525566	649	109									TXNRD1_ENST00000525566	0.12844	0.825688	0.0458716
CaMK1b	343	108					CaMK1b	0.407407	0.583333	0.00925926	CaMK1b	0.407407	0.583333	0.00925926
FAM108A1	361	108	FAM108A1	0.509259	0.490741	0	FAM108A1	0.509259	0.490741	0	FAM108A1	0.509259	0.490741	0
PRR5	388	108					PRR5	0.37963	0.583333	0.037037	PRR5	0.37963	0.583333	0.037037
CBX6	412	108					CBX6	0.388889	0.611111	0	CBX6	0.388889	0.611111	0
IRF3	427	108					IRF3	0.407407	0.564815	0.0277778	IRF3	0.407407	0.564815	0.0277778
CDCP2	449	108	CDCP2	0.472222	0.518519	0.00925926	CDCP2	0.472222	0.518519	0.00925926	CDCP2	0.472222	0.518519	0.00925926
COLQ	455	108					COLQ	0.222222	0.648148	0.12963	COLQ	0.222222	0.648148	0.12963
VIPR1	457	108									VIPR1	0.37037	0.601852	0.0277778
PLEKHS1	465	108									PLEKHS1	0.138889	0.824074	0.037037
SLC2A8	477	108					SLC2A8	0.398148	0.583333	0.0185185	SLC2A8	0.398148	0.583333	0.0185185
ENTPD2	495	108	ENTPD2	0.481481	0.481481	0.037037	ENTPD2	0.481481	0.481481	0.037037	ENTPD2	0.481481	0.481481	0.037037
STAM2	525	108									STAM2	0.12963	0.824074	0.0462963
ZNF503	646	108					ZNF503	0.398148	0.592593	0.00925926	ZNF503	0.398148	0.592593	0.00925926
ANKS3	656	108					ANKS3	0.37037	0.564815	0.0648148	ANKS3	0.37037	0.564815	0.0648148
MAX_ENST00000556979	103	107	MAX_ENST00000556979	0.0186916	0.850467	0.130841	MAX_ENST00000556979	0.0186916	0.850467	0.130841	MAX_ENST00000556979	0.0186916	0.850467	0.130841
CALB2	271	107					CALB2	0.383178	0.588785	0.0280374	CALB2	0.383178	0.588785	0.0280374
GSDMB_ENST00000418519	416	107					GSDMB_ENST00000418519	0.35514	0.570093	0.0747664	GSDMB_ENST00000418519	0.35514	0.570093	0.0747664
CCNJL	435	107					CCNJL	0.373832	0.570093	0.0560748	CCNJL	0.373832	0.570093	0.0560748
FBXO7_ENST00000382058	443	107					FBXO7_ENST00000382058	0.383178	0.560748	0.0560748	FBXO7_ENST00000382058	0.383178	0.560748	0.0560748
SLC46A2	475	107									SLC46A2	0.373832	0.598131	0.0280374
CRISPLD2	497	107					CRISPLD2	0.392523	0.598131	0.00934579	CRISPLD2	0.392523	0.598131	0.00934579
LARGE_ENST00000452586	555	107									LARGE_ENST00000452586	0.168224	0.831776	0
NAPRT1_ENST00000276844	566	107									NAPRT1_ENST00000276844	0.205607	0.682243	0.11215
OR2L1P	312	106									OR2L1P	0.367925	0.622642	0.00943396
OR1G1	313	106					OR1G1	0.396226	0.603774	0	OR1G1	0.396226	0.603774	0
EPYC	322	106					EPYC	0.235849	0.650943	0.113208	EPYC	0.235849	0.650943	0.113208
ST3GAL1	340	106									ST3GAL1	0.367925	0.632075	0
OR3A4	348	106									OR3A4	0.377358	0.613208	0.00943396
PNCK_ENST00000370145	360	106					PNCK_ENST00000370145	0.415094	0.575472	0.00943396	PNCK_ENST00000370145	0.415094	0.575472	0.00943396
RAD51B_ENST00000487270	384	106									RAD51B_ENST00000487270	0.141509	0.820755	0.0377358
SAG	405	106									SAG	0.141509	0.830189	0.0283019
SPRED1	444	106	SPRED1	0.169811	0.641509	0.188679	SPRED1	0.169811	0.641509	0.188679	SPRED1	0.169811	0.641509	0.188679
STEAP3_ENST00000409811	457	106					STEAP3_ENST00000409811	0.415094	0.556604	0.0283019	STEAP3_ENST00000409811	0.415094	0.556604	0.0283019
DUX4L2	485	106	DUX4L2	0	1	0					DUX4L2	0	1	0
PSAPL1_ENST00000319098	521	106					PSAPL1_ENST00000319098	0.424528	0.518868	0.0566038	PSAPL1_ENST00000319098	0.424528	0.518868	0.0566038
HOMEZ_ENST00000357460	550	106									HOMEZ_ENST00000357460	0.141509	0.820755	0.0377358
CYLD_ENST00000427738	956	106					CYLD_ENST00000427738	0.179245	0.679245	0.141509	CYLD_ENST00000427738	0.179245	0.679245	0.141509
LHFPL3_ENST00000543266	232	105					LHFPL3_ENST00000543266	0.419048	0.542857	0.0380952	LHFPL3_ENST00000543266	0.419048	0.542857	0.0380952
HOXA11	313	105					HOXA11	0.4	0.52381	0.0761905	HOXA11	0.4	0.52381	0.0761905
SSTR5	364	105					SSTR5	0.390476	0.6	0.00952381	SSTR5	0.390476	0.6	0.00952381
ARMC6_ENST00000535612	501	105									ARMC6_ENST00000535612	0.333333	0.590476	0.0761905
PARN_ENST00000437198	639	105					PARN_ENST00000437198	0.104762	0.838095	0.0571429	PARN_ENST00000437198	0.104762	0.838095	0.0571429
CPA6_ENST00000518549	315	104	CPA6_ENST00000518549	0.201923	0.653846	0.144231	CPA6_ENST00000518549	0.201923	0.653846	0.144231	CPA6_ENST00000518549	0.201923	0.653846	0.144231
BDKRB1	353	104									BDKRB1	0.336538	0.596154	0.0673077
TBX10	385	104					TBX10	0.384615	0.576923	0.0384615	TBX10	0.384615	0.576923	0.0384615
IFT57	429	104	IFT57	0.192308	0.644231	0.163462	IFT57	0.192308	0.644231	0.163462	IFT57	0.192308	0.644231	0.163462
ZMYND10	440	104									ZMYND10	0.307692	0.596154	0.0961538
MANEA	462	104					MANEA	0.0961538	0.836538	0.0673077	MANEA	0.0961538	0.836538	0.0673077
CCDC6	474	104					CCDC6	0.144231	0.740385	0.115385	CCDC6	0.144231	0.740385	0.115385
RBM45	474	104					RBM45	0.211538	0.673077	0.115385	RBM45	0.211538	0.673077	0.115385
ATG14	492	104					ATG14	0.153846	0.711538	0.134615	ATG14	0.153846	0.711538	0.134615
TCEB3C	546	104					TCEB3C	0.230769	0.644231	0.125	TCEB3C	0.230769	0.644231	0.125
C12orf4	552	104					C12orf4	0.201923	0.682692	0.115385	C12orf4	0.201923	0.682692	0.115385
MTF2	593	104					MTF2	0.125	0.759615	0.115385	MTF2	0.125	0.759615	0.115385
CBLN4	201	103									CBLN4	0.368932	0.621359	0.00970874
LHFPL5	219	103					LHFPL5	0.38835	0.592233	0.0194175	LHFPL5	0.38835	0.592233	0.0194175
TNFRSF14_ENST00000355716	283	103					TNFRSF14_ENST00000355716	0.106796	0.776699	0.116505	TNFRSF14_ENST00000355716	0.106796	0.776699	0.116505
IDH3B	385	103					IDH3B	0.135922	0.84466	0.0194175	IDH3B	0.135922	0.84466	0.0194175
GSDMB	394	103					GSDMB	0.359223	0.563107	0.0776699	GSDMB	0.359223	0.563107	0.0776699
ZNF323	406	103					ZNF323	0.184466	0.679612	0.135922	ZNF323	0.184466	0.679612	0.135922
ZNF491	437	103					ZNF491	0.15534	0.718447	0.126214	ZNF491	0.15534	0.718447	0.126214
COLQ_ENST00000383781	445	103					COLQ_ENST00000383781	0.194175	0.669903	0.135922	COLQ_ENST00000383781	0.194175	0.669903	0.135922
EME2	459	103					EME2	0.368932	0.563107	0.0679612	EME2	0.368932	0.563107	0.0679612
ETV4_ENST00000319349	484	103					ETV4_ENST00000319349	0.368932	0.572816	0.0582524	ETV4_ENST00000319349	0.368932	0.572816	0.0582524
TCHP	498	103									TCHP	0.116505	0.786408	0.0970874
NAPRT1_ENST00000449291	538	103					NAPRT1_ENST00000449291	0.174757	0.708738	0.116505	NAPRT1_ENST00000449291	0.174757	0.708738	0.116505
MTMR2	571	103	MTMR2	0.23301	0.61165	0.15534	MTMR2	0.23301	0.61165	0.15534	MTMR2	0.23301	0.61165	0.15534
N4BP2L2	583	103					N4BP2L2	0.135922	0.834951	0.0291262	N4BP2L2	0.135922	0.834951	0.0291262
SKOR2	1001	103					SKOR2	0.359223	0.582524	0.0582524	SKOR2	0.359223	0.582524	0.0582524
TSSK6	273	102					TSSK6	0.411765	0.54902	0.0392157	TSSK6	0.411765	0.54902	0.0392157
TCEA3	348	102					TCEA3	0.156863	0.72549	0.117647	TCEA3	0.156863	0.72549	0.117647
MAPK13	365	102					MAPK13	0.411765	0.578431	0.00980392	MAPK13	0.411765	0.578431	0.00980392
LUC7L2_ENST00000263545	391	102	LUC7L2_ENST00000263545	0.0980392	0.745098	0.156863	LUC7L2_ENST00000263545	0.0980392	0.745098	0.156863	LUC7L2_ENST00000263545	0.0980392	0.745098	0.156863
C7orf72	438	102					C7orf72	0.0980392	0.862745	0.0392157	C7orf72	0.0980392	0.862745	0.0392157
EME2_ENST00000307394	444	102					EME2_ENST00000307394	0.401961	0.578431	0.0196078	EME2_ENST00000307394	0.401961	0.578431	0.0196078
TUBD1	453	102									TUBD1	0.117647	0.794118	0.0882353
SLC16A3	465	102	SLC16A3	0.441176	0.5	0.0588235	SLC16A3	0.441176	0.5	0.0588235	SLC16A3	0.441176	0.5	0.0588235
DENND1A_ENST00000373618	466	102					DENND1A_ENST00000373618	0.372549	0.578431	0.0490196	DENND1A_ENST00000373618	0.372549	0.578431	0.0490196
MYCBP2_ENST00000360084	512	102					MYCBP2_ENST00000360084	0.186275	0.686275	0.127451	MYCBP2_ENST00000360084	0.186275	0.686275	0.127451
CDC7	574	102					CDC7	0.156863	0.705882	0.137255	CDC7	0.156863	0.705882	0.137255
TRIB2	343	101					TRIB2	0.386139	0.60396	0.00990099	TRIB2	0.386139	0.60396	0.00990099
LUC7L2_ENST00000541170	389	101	LUC7L2_ENST00000541170	0.108911	0.732673	0.158416	LUC7L2_ENST00000541170	0.108911	0.732673	0.158416	LUC7L2_ENST00000541170	0.108911	0.732673	0.158416
PTPN2	415	101	PTPN2	0.148515	0.70297	0.148515	PTPN2	0.148515	0.70297	0.148515	PTPN2	0.148515	0.70297	0.148515
MAPK9_ENST00000452135	424	101									MAPK9_ENST00000452135	0.148515	0.821782	0.029703
COLQ_ENST00000435459	445	101	COLQ_ENST00000435459	0.207921	0.643564	0.148515	COLQ_ENST00000435459	0.207921	0.643564	0.148515	COLQ_ENST00000435459	0.207921	0.643564	0.148515
CYP39A1	469	101									CYP39A1	0.118812	0.831683	0.049505
ERLEC1	483	101									ERLEC1	0.158416	0.821782	0.019802
POLG2	485	101					POLG2	0.128713	0.851485	0.019802	POLG2	0.128713	0.851485	0.019802
LMAN1	510	101	LMAN1	0.178218	0.653465	0.168317	LMAN1	0.178218	0.653465	0.168317	LMAN1	0.178218	0.653465	0.168317
TJAP1_ENST00000372445	557	101									TJAP1_ENST00000372445	0.168317	0.821782	0.00990099
RPS6KL1	572	101									RPS6KL1	0.366337	0.594059	0.039604
PRL	227	100									PRL	0.35	0.59	0.06
RGR	295	100					RGR	0.44	0.54	0.02	RGR	0.44	0.54	0.02
TNFSF11	317	100					TNFSF11	0.21	0.67	0.12	TNFSF11	0.21	0.67	0.12
GPR31	319	100					GPR31	0.42	0.58	0	GPR31	0.42	0.58	0
ABCB8_ENST00000356058	467	100									ABCB8_ENST00000356058	0.37	0.6	0.03
SMARCD2_ENST00000323347	483	100	SMARCD2_ENST00000323347	0.2	0.6	0.2	SMARCD2_ENST00000323347	0.2	0.6	0.2	SMARCD2_ENST00000323347	0.2	0.6	0.2
KLHL23	558	100					KLHL23	0.09	0.89	0.02	KLHL23	0.09	0.89	0.02
TRAFD1	582	100					TRAFD1	0.12	0.85	0.03	TRAFD1	0.12	0.85	0.03
LRRD1	860	100					LRRD1	0.08	0.81	0.11	LRRD1	0.08	0.81	0.11
CCR8	355	99					CCR8	0.424242	0.555556	0.020202
ZNF207	478	99					ZNF207	0.0505051	0.868687	0.0808081
SUCNR1	334	98	SUCNR1	0.193878	0.663265	0.142857	SUCNR1	0.193878	0.663265	0.142857
WDR45	361	98					WDR45	0.22449	0.642857	0.132653
MAPK13_ENST00000211287	365	98					MAPK13_ENST00000211287	0.408163	0.581633	0.0102041
IDH3B_ENST00000380851	383	98					IDH3B_ENST00000380851	0.142857	0.846939	0.0102041
ZNF558	402	98					ZNF558	0.377551	0.571429	0.0510204
MSL3_ENST00000337339	416	98					MSL3_ENST00000337339	0.132653	0.836735	0.0306122
FGD4_ENST00000266482	471	98	FGD4_ENST00000266482	0.244898	0.591837	0.163265	FGD4_ENST00000266482	0.244898	0.591837	0.163265
EPB41L5_ENST00000443124	505	98					EPB41L5_ENST00000443124	0.153061	0.714286	0.132653
RCOR2	523	98					RCOR2	0.122449	0.846939	0.0306122
ZNF20	579	98					ZNF20	0.346939	0.571429	0.0816327
ODF2L_ENST00000294678	620	98					ODF2L_ENST00000294678	0.102041	0.785714	0.112245
ECD	644	98	ECD	0.132653	0.714286	0.153061	ECD	0.132653	0.714286	0.153061
IL36B	164	97	IL36B	0.237113	0.618557	0.14433	IL36B	0.237113	0.618557	0.14433
IL36B_ENST00000259213	164	97	IL36B_ENST00000259213	0.237113	0.618557	0.14433	IL36B_ENST00000259213	0.237113	0.618557	0.14433
RSPO1	263	97					RSPO1	0.412371	0.56701	0.0206186
IL2RA	272	97					IL2RA	0.268041	0.618557	0.113402
C6orf58	330	97					C6orf58	0.216495	0.670103	0.113402
RAD51B_ENST00000488612	366	97					RAD51B_ENST00000488612	0.14433	0.835052	0.0206186
FAH	419	97					FAH	0.391753	0.56701	0.0412371
FBRS_ENST00000287468	460	97					FBRS_ENST00000287468	0.42268	0.515464	0.0618557
DMAP1	467	97					DMAP1	0.134021	0.845361	0.0206186
C20orf54	469	97					C20orf54	0.412371	0.56701	0.0206186
TCF12_ENST00000343827	512	97					TCF12_ENST00000343827	0.0515464	0.865979	0.0824742
BEND7_ENST00000396900	519	97					BEND7_ENST00000396900	0.391753	0.556701	0.0515464
CASP10	522	97					CASP10	0.43299	0.536082	0.0309278
PPP3CB	524	97					PPP3CB	0.216495	0.649485	0.134021
JUB	538	97	JUB	0.154639	0.659794	0.185567	JUB	0.154639	0.659794	0.185567
PRPF38B	546	97	PRPF38B	0.226804	0.628866	0.14433	PRPF38B	0.226804	0.628866	0.14433
ZNF654_ENST00000309495	581	97					ZNF654_ENST00000309495	0.103093	0.783505	0.113402
RPAP3	665	97					RPAP3	0.134021	0.731959	0.134021
HOXC6	235	96	HOXC6	0.447917	0.541667	0.0104167	HOXC6	0.447917	0.541667	0.0104167
LHFPL4	247	96					LHFPL4	0.40625	0.583333	0.0104167
CRLF2_ENST00000381567	256	96					CRLF2_ENST00000381567	0.104167	0.770833	0.125
TNNT1	278	96					TNNT1	0.125	0.864583	0.0104167
TCF7L2_ENST00000542695	335	96					TCF7L2_ENST00000542695	0.0729167	0.833333	0.09375
ZDHHC15	337	96					ZDHHC15	0.135417	0.833333	0.03125
RAD51	339	96					RAD51	0.0833333	0.854167	0.0625
APOBEC3D_ENST00000381568	386	96					APOBEC3D_ENST00000381568	0.416667	0.541667	0.0416667
RSRC2_ENST00000354654	386	96					RSRC2_ENST00000354654	0.15625	0.708333	0.135417
PRKAR2B	418	96					PRKAR2B	0.104167	0.8125	0.0833333
RBBP7	425	96					RBBP7	0.135417	0.854167	0.0104167
METTL14	456	96	METTL14	0.0520833	0.927083	0.0208333	METTL14	0.0520833	0.927083	0.0208333
CASP10_ENST00000272879	521	96					CASP10_ENST00000272879	0.385417	0.5625	0.0520833
ZNF20_ENST00000292241	532	96					ZNF20_ENST00000292241	0.34375	0.572917	0.0833333
RFT1	541	96					RFT1	0.375	0.572917	0.0520833
ZKSCAN4	545	96					ZKSCAN4	0.354167	0.5625	0.0833333
CDKN2AIP	580	96					CDKN2AIP	0.25	0.625	0.125
MED17	651	96					MED17	0.09375	0.802083	0.104167
CEACAM21	293	95					CEACAM21	0.231579	0.642105	0.126316
OR7A10	309	95					OR7A10	0.389474	0.589474	0.0210526
QKI_ENST00000275262	325	95					QKI_ENST00000275262	0.168421	0.705263	0.126316
RSRC1	334	95					RSRC1	0.136842	0.736842	0.126316
FBXO28	368	95					FBXO28	0.189474	0.673684	0.136842
LHX3_ENST00000371748	397	95					LHX3_ENST00000371748	0.147368	0.736842	0.115789
HS6ST1	411	95					HS6ST1	0.2	0.673684	0.126316
GRHL1	429	95					GRHL1	0.294737	0.568421	0.136842
RNFT2	444	95					RNFT2	0.389474	0.578947	0.0315789
BEND7	468	95					BEND7	0.410526	0.536842	0.0526316
PSEN2_ENST00000391872	481	95					PSEN2_ENST00000391872	0.389474	0.589474	0.0210526
CDC25A	524	95					CDC25A	0.221053	0.652632	0.126316
SLC41A2_ENST00000258538	573	95					SLC41A2_ENST00000258538	0.189474	0.673684	0.136842
NUDT10	164	94	NUDT10	0.702128	0.276596	0.0212766	NUDT10	0.702128	0.276596	0.0212766
CEACAM21_ENST00000401445	293	94					CEACAM21_ENST00000401445	0.234043	0.638298	0.12766
ENSG00000183059	339	94	ENSG00000183059	0.457447	0.510638	0.0319149	ENSG00000183059	0.457447	0.510638	0.0319149
PTAFR	342	94					PTAFR	0.393617	0.574468	0.0319149
IDS_ENST00000370441	343	94					IDS_ENST00000370441	0.404255	0.574468	0.0212766
HOXB2	356	94					HOXB2	0.404255	0.574468	0.0212766
IBA57	356	94					IBA57	0.43617	0.56383	0
ATP6V1C2	381	94					ATP6V1C2	0.276596	0.606383	0.117021
MTRF1	445	94					MTRF1	0.159574	0.702128	0.138298
ST7L	575	94					ST7L	0.202128	0.680851	0.117021
NACC2	587	94					NACC2	0.382979	0.542553	0.0744681
GSX2	304	93					GSX2	0.387097	0.569892	0.0430108
SLC39A3	314	93					SLC39A3	0.419355	0.580645	0
PRMT1	347	93					PRMT1	0.397849	0.569892	0.0322581
PSMD4	377	93					PSMD4	0.107527	0.860215	0.0322581
PTPN2_ENST00000327283	387	93					PTPN2_ENST00000327283	0.139785	0.731183	0.129032
NIPAL3	406	93					NIPAL3	0.387097	0.602151	0.0107527
SAMD14	445	93					SAMD14	0.150538	0.83871	0.0107527
RNF8	485	93					RNF8	0.129032	0.731183	0.139785
TMEM232	506	93	TMEM232	0.172043	0.677419	0.150538	TMEM232	0.172043	0.677419	0.150538
ARSA	509	93					ARSA	0.430108	0.569892	0
PPP3CB_ENST00000394822	514	93					PPP3CB_ENST00000394822	0.182796	0.698925	0.11828
GOLGA6C_ENST00000300576	693	93					GOLGA6C_ENST00000300576	0.129032	0.870968	0
HIST3H3	136	92					HIST3H3	0.119565	0.880435	0
NKX3-1	234	92					NKX3-1	0.076087	0.880435	0.0434783
FAM133A	248	92					FAM133A	0.0978261	0.782609	0.119565
MBD3	291	92					MBD3	0.391304	0.565217	0.0434783
KCNK16	309	92					KCNK16	0.347826	0.565217	0.0869565
SIX3	332	92					SIX3	0.380435	0.586957	0.0326087
DNAJB1	340	92					DNAJB1	0.163043	0.836957	0
CAMK1	370	92					CAMK1	0.445652	0.521739	0.0326087
PRMT1_ENST00000454376	371	92					PRMT1_ENST00000454376	0.380435	0.586957	0.0326087
METTL8_ENST00000375258	378	92	METTL8_ENST00000375258	0.152174	0.641304	0.206522	METTL8_ENST00000375258	0.152174	0.641304	0.206522
LCLAT1	414	92					LCLAT1	0.152174	0.728261	0.119565
LUC7L3	432	92	LUC7L3	0.0869565	0.706522	0.206522	LUC7L3	0.0869565	0.706522	0.206522
CCBL2_ENST00000260508	454	92					CCBL2_ENST00000260508	0.130435	0.847826	0.0217391
ANGPTL3	460	92					ANGPTL3	0.108696	0.847826	0.0434783
RAD21L1_ENST00000409241	556	92					RAD21L1_ENST00000409241	0.108696	0.76087	0.130435
AGFG1	562	92					AGFG1	0.108696	0.858696	0.0326087
MTMR1_ENST00000451863	568	92					MTMR1_ENST00000451863	0.195652	0.684783	0.119565
ANKRD62	903	92					ANKRD62	0.076087	0.847826	0.076087
HAND2	217	91					HAND2	0.43956	0.56044	0
VENTX	258	91					VENTX	0.153846	0.725275	0.120879
DUOXA2_ENST00000323030	320	91					DUOXA2_ENST00000323030	0.362637	0.582418	0.0549451
TMEM30A	361	91	TMEM30A	0.142857	0.626374	0.230769	TMEM30A	0.142857	0.626374	0.230769
MAPK9	382	91					MAPK9	0.120879	0.857143	0.021978
ZMYND10_ENST00000360165	435	91					ZMYND10_ENST00000360165	0.318681	0.571429	0.10989
WAC_ENST00000428935	436	91					WAC_ENST00000428935	0.307692	0.582418	0.10989
SLC41A2	490	91	SLC41A2	0.186813	0.67033	0.142857	SLC41A2	0.186813	0.67033	0.142857
IFT172_ENST00000416524	511	91					IFT172_ENST00000416524	0.142857	0.835165	0.021978
PGM3	542	91					PGM3	0.153846	0.835165	0.010989
FZD5	585	91					FZD5	0.384615	0.582418	0.032967
ECD_ENST00000430082	677	91	ECD_ENST00000430082	0.120879	0.736264	0.142857	ECD_ENST00000430082	0.120879	0.736264	0.142857
KCNK1_ENST00000366620	220	90					KCNK1_ENST00000366620	0.4	0.555556	0.0444444
C20orf70	249	90					C20orf70	0.4	0.577778	0.0222222
INMT	263	90					INMT	0.422222	0.544444	0.0333333
HUS1B	278	90					HUS1B	0.411111	0.566667	0.0222222
SDHB	280	90					SDHB	0.0555556	0.877778	0.0666667
TMIGD2	282	90					TMIGD2	0.366667	0.566667	0.0666667
PHF6_ENST00000370800	312	90	PHF6_ENST00000370800	0.0777778	0.6	0.322222	PHF6_ENST00000370800	0.0777778	0.6	0.322222
DBX1	382	90	DBX1	0.455556	0.522222	0.0222222	DBX1	0.455556	0.522222	0.0222222
OLA1	396	90					OLA1	0.355556	0.577778	0.0666667
FOXD4L1	408	90					FOXD4L1	0.411111	0.555556	0.0333333
SRSF11_ENST00000370949	424	90					SRSF11_ENST00000370949	0.111111	0.755556	0.133333
TAF1A	450	90					TAF1A	0.188889	0.688889	0.122222
EIF2S3L	472	90					EIF2S3L	0.444444	0.555556	0
MAZ_ENST00000322945	477	90					MAZ_ENST00000322945	0.366667	0.577778	0.0555556
DUX4L4	483	90					DUX4L4	0.122222	0.877778	0
RBPJ_ENST00000345843	485	90	RBPJ_ENST00000345843	0.233333	0.622222	0.144444	RBPJ_ENST00000345843	0.233333	0.622222	0.144444
HIST2H2AC	129	89	HIST2H2AC	0.460674	0.52809	0.011236	HIST2H2AC	0.460674	0.52809	0.011236
NOVA1_ENST00000344429	181	89					NOVA1_ENST00000344429	0.303371	0.561798	0.134831
FBP1	338	89					FBP1	0.404494	0.561798	0.0337079
GMPR	345	89					GMPR	0.382022	0.573034	0.0449438
HOMER2_ENST00000304231	354	89					HOMER2_ENST00000304231	0.393258	0.595506	0.011236
CYP27B1	508	89					CYP27B1	0.146067	0.842697	0.011236
FAM189A1	539	89					FAM189A1	0.393258	0.58427	0.0224719
FLVCR1	555	89					FLVCR1	0.404494	0.539326	0.0561798
IFT74	600	89					IFT74	0.101124	0.820225	0.0786517
FEM1C	617	89					FEM1C	0.134831	0.842697	0.0224719
UTY_ENST00000331397	1347	89					UTY_ENST00000331397	0.157303	0.707865	0.134831
KRTAP1-5	174	88					KRTAP1-5	0.102273	0.875	0.0227273
CABP2	220	88					CABP2	0.397727	0.568182	0.0340909
KCNK1_ENST00000446915	241	88					KCNK1_ENST00000446915	0.375	0.579545	0.0454545
OR6B2	312	88					OR6B2	0.420455	0.534091	0.0454545
SRSF6_ENST00000244020	344	88	SRSF6_ENST00000244020	0.113636	0.727273	0.159091	SRSF6_ENST00000244020	0.113636	0.727273	0.159091
LLGL2_ENST00000578363	356	88					LLGL2_ENST00000578363	0.386364	0.602273	0.0113636
CXXC4_ENST00000394767	367	88	CXXC4_ENST00000394767	0.556818	0.386364	0.0568182	CXXC4_ENST00000394767	0.556818	0.386364	0.0568182
FOXE1	373	88					FOXE1	0.420455	0.579545	0
PEX14	377	88					PEX14	0.363636	0.556818	0.0795455
VPS13B_ENST00000441350	415	88					VPS13B_ENST00000441350	0.204545	0.659091	0.136364
HOMER2	417	88					HOMER2	0.386364	0.602273	0.0113636
CCBL2_ENST00000370491	420	88					CCBL2_ENST00000370491	0.136364	0.840909	0.0227273
FBXO47	452	88					FBXO47	0.0681818	0.875	0.0568182
METAP2	478	88					METAP2	0.125	0.761364	0.113636
ZNF181	507	88					ZNF181	0.193182	0.693182	0.113636
UTY	1347	88					UTY	0.159091	0.704545	0.136364
HIST1H2BH	126	87					HIST1H2BH	0.413793	0.574713	0.0114943
RHOB	196	87					RHOB	0.126437	0.83908	0.0344828
NKAIN3	197	87					NKAIN3	0.137931	0.735632	0.126437
CD58	250	87	CD58	0.126437	0.609195	0.264368	CD58	0.126437	0.609195	0.264368
TNFRSF14	283	87	TNFRSF14	0.0804598	0.770115	0.149425	TNFRSF14	0.0804598	0.770115	0.149425
TAS2R7	318	87					TAS2R7	0.264368	0.62069	0.114943
KCNK16_ENST00000425054	322	87					KCNK16_ENST00000425054	0.321839	0.563218	0.114943
IL12B	328	87					IL12B	0.402299	0.528736	0.0689655
OR1L6	347	87					OR1L6	0.436782	0.551724	0.0114943
RBM4B	359	87					RBM4B	0.37931	0.609195	0.0114943
MAPK8	384	87					MAPK8	0.114943	0.770115	0.114943
PHLDA1	401	87					PHLDA1	0.126437	0.850575	0.0229885
FADS3	445	87					FADS3	0.37931	0.597701	0.0229885
CECR2_ENST00000342247	456	87					CECR2_ENST00000342247	0.298851	0.574713	0.126437
ANKUB1	544	87					ANKUB1	0.149425	0.83908	0.0114943
HAUS3	603	87					HAUS3	0.0689655	0.827586	0.103448
AKAP10	662	87					AKAP10	0.195402	0.678161	0.126437
CHADL	762	87					CHADL	0.413793	0.574713	0.0114943
KRTAP5-10	202	86					KRTAP5-10	0.383721	0.604651	0.0116279
SLC13A3_ENST00000339636	232	86					SLC13A3_ENST00000339636	0.395349	0.523256	0.0813953
RSPO4	234	86					RSPO4	0.348837	0.569767	0.0813953
GPS2	327	86	GPS2	0.127907	0.55814	0.313953	GPS2	0.127907	0.55814	0.313953
ATP6V0D1	351	86					ATP6V0D1	0.395349	0.55814	0.0465116
B4GALT6	382	86					B4GALT6	0.22093	0.651163	0.127907
IFT52	437	86					IFT52	0.360465	0.581395	0.0581395
FKTN	461	86					FKTN	0.209302	0.662791	0.127907
Q5I0X0_HUMAN	466	86	Q5I0X0_HUMAN	0.453488	0.546512	0	Q5I0X0_HUMAN	0.453488	0.546512	0
TXLNG	528	86					TXLNG	0.186047	0.674419	0.139535
TMEM151B	566	86					TMEM151B	0.395349	0.55814	0.0465116
AGFG1_ENST00000409979	584	86					AGFG1_ENST00000409979	0.116279	0.848837	0.0348837
TAP2_ENST00000374899	653	86					TAP2_ENST00000374899	0.255814	0.627907	0.116279
ANKRD31	724	86					ANKRD31	0.104651	0.77907	0.116279
ZNF486	215	85					ZNF486	0.105882	0.870588	0.0235294
SPDYE4	237	85					SPDYE4	0.364706	0.576471	0.0588235
SPIC	248	85					SPIC	0.388235	0.588235	0.0235294
NXPH4	308	85					NXPH4	0.4	0.588235	0.0117647
FAM49B	324	85					FAM49B	0.211765	0.647059	0.141176
IL12B_ENST00000231228	328	85					IL12B_ENST00000231228	0.388235	0.552941	0.0588235
EPB41L4A_ENST00000359109	338	85					EPB41L4A_ENST00000359109	0.141176	0.741176	0.117647
SCAMP3	347	85					SCAMP3	0.388235	0.541176	0.0705882
RNF32	362	85					RNF32	0.129412	0.847059	0.0235294
ANTXR1_ENST00000409349	368	85					ANTXR1_ENST00000409349	0.4	0.529412	0.0705882
NUP43	380	85					NUP43	0.117647	0.835294	0.0470588
ACTR3B	418	85	ACTR3B	0.447059	0.529412	0.0235294	ACTR3B	0.447059	0.529412	0.0235294
CTDSPL2	466	85					CTDSPL2	0.105882	0.788235	0.105882
SHPK	478	85					SHPK	0.352941	0.576471	0.0705882
USP14	494	85	USP14	0.129412	0.682353	0.188235	USP14	0.129412	0.682353	0.188235
FAM200A	573	85					FAM200A	0.0705882	0.905882	0.0235294
ENSG00000255561	624	85					ENSG00000255561	0.388235	0.576471	0.0352941
KRTAP5-7	165	84					KRTAP5-7	0.404762	0.595238	0
ACP5	325	84					ACP5	0.380952	0.571429	0.047619
ZDHHC3	327	84	ZDHHC3	0.345238	0.5	0.154762	ZDHHC3	0.345238	0.5	0.154762
PDLIM4	330	84					PDLIM4	0.392857	0.571429	0.0357143
NXF1_ENST00000531709	356	84					NXF1_ENST00000531709	0.261905	0.607143	0.130952
MRPS22	360	84	MRPS22	0.0714286	0.916667	0.0119048	MRPS22	0.0714286	0.916667	0.0119048
SLC39A13	364	84					SLC39A13	0.404762	0.595238	0
OFD1_ENST00000398395	367	84					OFD1_ENST00000398395	0.107143	0.761905	0.130952
CYP2B7P1	377	84					CYP2B7P1	0.416667	0.583333	0
OLFML1	402	84					OLFML1	0.27381	0.607143	0.119048
FAM69B	431	84					FAM69B	0.392857	0.535714	0.0714286
SLC35B2	432	84					SLC35B2	0.178571	0.690476	0.130952
ENO1	434	84					ENO1	0.380952	0.607143	0.0119048
PTPN1	435	84	PTPN1	0.178571	0.678571	0.142857	PTPN1	0.178571	0.678571	0.142857
TMEM194A_ENST00000300128	444	84					TMEM194A_ENST00000300128	0.214286	0.666667	0.119048
BBS4	519	84					BBS4	0.142857	0.845238	0.0119048
GAPVD1_ENST00000394104	1478	84					GAPVD1_ENST00000394104	0.107143	0.833333	0.0595238
NETO1_ENST00000397929	156	83	NETO1_ENST00000397929	0.0843373	0.771084	0.144578	NETO1_ENST00000397929	0.0843373	0.771084	0.144578
BTG1	171	83					BTG1	0.337349	0.578313	0.0843373
EFNA5	228	83					EFNA5	0.385542	0.542169	0.0722892
PRR5_ENST00000432186	266.333	83					PRR5_ENST00000432186	0.385542	0.60241	0.0120482
ICAM4_ENST00000380770	271	83					ICAM4_ENST00000380770	0.385542	0.578313	0.0361446
CPPED1	314	83					CPPED1	0.361446	0.566265	0.0722892
OR3A3	321	83					OR3A3	0.39759	0.518072	0.0843373
PURA	322	83	PURA	0.53012	0.46988	0	PURA	0.53012	0.46988	0
RAD51B_ENST00000471583	350	83					RAD51B_ENST00000471583	0.0843373	0.891566	0.0240964
GPD1L	351	83					GPD1L	0.373494	0.578313	0.0481928
CSNK1G1_ENST00000303052	422	83	CSNK1G1_ENST00000303052	0.13253	0.722892	0.144578	CSNK1G1_ENST00000303052	0.13253	0.722892	0.144578
ACTL6A	429	83					ACTL6A	0.108434	0.807229	0.0843373
ICA1_ENST00000422063	512	83					ICA1_ENST00000422063	0.204819	0.674699	0.120482
CCDC112	529	83	CCDC112	0.156627	0.698795	0.144578	CCDC112	0.156627	0.698795	0.144578
CUL2_ENST00000537177	764	83					CUL2_ENST00000537177	0.108434	0.819277	0.0722892
UTY_ENST00000382896	1392	83					UTY_ENST00000382896	0.168675	0.710843	0.120482
C1orf111	261	82					C1orf111	0.414634	0.536585	0.0487805
KRTAP5-1	278	82					KRTAP5-1	0.402439	0.597561	0
PIH1D1	290	82					PIH1D1	0.353659	0.560976	0.0853659
SDC1	310	82					SDC1	0.414634	0.54878	0.0365854
TBCD_ENST00000397466	311	82	TBCD_ENST00000397466	0.487805	0.45122	0.0609756	TBCD_ENST00000397466	0.487805	0.45122	0.0609756
EPCAM	314	82					EPCAM	0.109756	0.841463	0.0487805
RNLS_ENST00000331772	342	82					RNLS_ENST00000331772	0.341463	0.573171	0.0853659
P2RX4	388	82					P2RX4	0.378049	0.560976	0.0609756
PHF10_ENST00000339209	498	82					PHF10_ENST00000339209	0.134146	0.731707	0.134146
TTC34	566	82					TTC34	0.158537	0.841463	0
DUSP21	190	81					DUSP21	0.395062	0.604938	0
KRTAP10-12	245	81	KRTAP10-12	0.45679	0.530864	0.0123457	KRTAP10-12	0.45679	0.530864	0.0123457
ATF5	282	81					ATF5	0.160494	0.839506	0
TRDN_ENST00000546248	297	81					TRDN_ENST00000546248	0.0987654	0.790123	0.111111
FAM92B	304	81					FAM92B	0.395062	0.555556	0.0493827
FAM125B	319	81					FAM125B	0.382716	0.567901	0.0493827
SH3YL1_ENST00000405430	342	81					SH3YL1_ENST00000405430	0.123457	0.839506	0.037037
ATXN7L3_ENST00000454077	354	81					ATXN7L3_ENST00000454077	0.197531	0.679012	0.123457
LRPAP1	357	81					LRPAP1	0.345679	0.580247	0.0740741
KLF8	359	81					KLF8	0.0987654	0.790123	0.111111
BEND7_ENST00000378605	374	81					BEND7_ENST00000378605	0.407407	0.530864	0.0617284
RASSF8	392	81					RASSF8	0.283951	0.580247	0.135802
ING3	418	81					ING3	0.160494	0.716049	0.123457
RASSF8_ENST00000541490	419	81					RASSF8_ENST00000541490	0.271605	0.592593	0.135802
TRIM31	425	81					TRIM31	0.333333	0.567901	0.0987654
TUBA1C	449	81					TUBA1C	0.395062	0.580247	0.0246914
RBPJ_ENST00000342295	500	81					RBPJ_ENST00000342295	0.222222	0.654321	0.123457
TRMT5	509	81					TRMT5	0.222222	0.654321	0.123457
IGF1	153	80					IGF1	0.075	0.9	0.025
RAB27B	218	80					RAB27B	0.3875	0.55	0.0625
LHFPL3_ENST00000424859	222	80					LHFPL3_ENST00000424859	0.4	0.575	0.025
IDS_ENST00000370443	312	80					IDS_ENST00000370443	0.4125	0.5625	0.025
RNLS	315	80					RNLS	0.3625	0.55	0.0875
SDS	328	80					SDS	0.3875	0.5875	0.025
TMEM59L	342	80					TMEM59L	0.3875	0.5625	0.05
HMBS	361	80					HMBS	0.15	0.8375	0.0125
SLC39A13_ENST00000362021	371	80					SLC39A13_ENST00000362021	0.3875	0.6125	0
TMEM184C	438	80					TMEM184C	0.1375	0.8375	0.025
KIAA1598	456	80					KIAA1598	0.1625	0.7125	0.125
AMIGO1	493	80					AMIGO1	0.375	0.55	0.075
C20orf194_ENST00000453730	495	80					C20orf194_ENST00000453730	0.1375	0.8375	0.025
SLC29A1_ENST00000313248	535	80					SLC29A1_ENST00000313248	0.4	0.5625	0.0375
MIER3	549	80					MIER3	0.1125	0.875	0.0125
ZNF568_ENST00000455427	571	80					ZNF568_ENST00000455427	0.225	0.65	0.125
IL1F8	157	79					IL1F8	0.177215	0.708861	0.113924
TWIST1	202	79	TWIST1	0.518987	0.455696	0.0253165	TWIST1	0.518987	0.455696	0.0253165
AZU1	251	79					AZU1	0.405063	0.56962	0.0253165
PHYHD1_ENST00000372592	291	79					PHYHD1_ENST00000372592	0.417722	0.56962	0.0126582
SLC35E3	313	79	SLC35E3	0.493671	0.506329	0	SLC35E3	0.493671	0.506329	0
IRF1	325	79					IRF1	0.227848	0.64557	0.126582
OTP	325	79					OTP	0.392405	0.56962	0.0379747
PSIP1_ENST00000380715	329	79	PSIP1_ENST00000380715	0.139241	0.670886	0.189873	PSIP1_ENST00000380715	0.139241	0.670886	0.189873
ST3GAL4	329	79					ST3GAL4	0.379747	0.556962	0.0632911
DFNB59	352	79					DFNB59	0.21519	0.658228	0.126582
PLEK2	353	79					PLEK2	0.392405	0.607595	0
GPRC5A	357	79					GPRC5A	0.392405	0.556962	0.0506329
KLF1	362	79					KLF1	0.139241	0.860759	0
C8orf47	374	79					C8orf47	0.101266	0.873418	0.0253165
TIA1	386	79					TIA1	0.113924	0.772152	0.113924
FBXO22	403	79					FBXO22	0.21519	0.670886	0.113924
ZDHHC23	409	79					ZDHHC23	0.21519	0.670886	0.113924
RNF8_ENST00000469731	448	79					RNF8_ENST00000469731	0.113924	0.772152	0.113924
FBXW9_ENST00000393261	458	79					FBXW9_ENST00000393261	0.392405	0.582278	0.0253165
C2orf29	510	79					C2orf29	0.139241	0.848101	0.0126582
DPYD_ENST00000306031	173	78					DPYD_ENST00000306031	0.141026	0.858974	0
CXXC4	198	78	CXXC4	0.551282	0.384615	0.0641026	CXXC4	0.551282	0.384615	0.0641026
TMEM150B	233	78					TMEM150B	0.358974	0.512821	0.128205
TPSD1	242	78	TPSD1	0.410256	0.5	0.0897436	TPSD1	0.410256	0.5	0.0897436
C1QC	245	78					C1QC	0.384615	0.589744	0.025641
CCNB1IP1	277	78					CCNB1IP1	0.0897436	0.820513	0.0897436
UPK3B	320	78					UPK3B	0.410256	0.564103	0.025641
MOSC2	335	78					MOSC2	0.397436	0.602564	0
RNF32_ENST00000343665	338	78					RNF32_ENST00000343665	0.141026	0.833333	0.025641
CCT7	339	78					CCT7	0.423077	0.551282	0.025641
SH3YL1_ENST00000356150	342	78					SH3YL1_ENST00000356150	0.128205	0.833333	0.0384615
STK19_ENST00000375333	368	78					STK19_ENST00000375333	0.153846	0.846154	0
METAP1	386	78					METAP1	0.217949	0.666667	0.115385
LTB4R2	389	78					LTB4R2	0.423077	0.538462	0.0384615
POGLUT1	392	78					POGLUT1	0.166667	0.717949	0.115385
PHF10	410	78	PHF10	0.141026	0.705128	0.153846	PHF10	0.141026	0.705128	0.153846
SCRN3	424	78					SCRN3	0.102564	0.858974	0.0384615
PRAMEF9	478	78					PRAMEF9	0.115385	0.884615	0
CWF19L1	538	78					CWF19L1	0.102564	0.846154	0.0512821
MSTO1	570	78					MSTO1	0.128205	0.871795	0
ID3	119	77	ID3	0.0649351	0.74026	0.194805	ID3	0.0649351	0.74026	0.194805
HSPD1_ENST00000426480	174	77					HSPD1_ENST00000426480	0.38961	0.571429	0.038961
SSX7	188	77					SSX7	0.402597	0.584416	0.012987
FAM58A	214	77	FAM58A	0.220779	0.597403	0.181818	FAM58A	0.220779	0.597403	0.181818
BCL10	233	77	BCL10	0.168831	0.688312	0.142857	BCL10	0.168831	0.688312	0.142857
KCTD15	234	77					KCTD15	0.415584	0.545455	0.038961
FOLR1	257	77					FOLR1	0.246753	0.623377	0.12987
PHF20L1	285	77	PHF20L1	0.103896	0.753247	0.142857	PHF20L1	0.103896	0.753247	0.142857
STX2_ENST00000392373	288	77					STX2_ENST00000392373	0.12987	0.753247	0.116883
NFKBIA_ENST00000216797	317	77					NFKBIA_ENST00000216797	0.0779221	0.805195	0.116883
DNAJC11_ENST00000426784	323.333	77	DNAJC11_ENST00000426784	0.285714	0.571429	0.142857	DNAJC11_ENST00000426784	0.285714	0.571429	0.142857
EIF3M	374	77					EIF3M	0.0649351	0.883117	0.0519481
SLC52A3	415	77	SLC52A3	0.467532	0.506494	0.025974	SLC52A3	0.467532	0.506494	0.025974
GNPTAB_ENST00000549940	490	77	GNPTAB_ENST00000549940	0.246753	0.584416	0.168831	GNPTAB_ENST00000549940	0.246753	0.584416	0.168831
SLC2A11_ENST00000345044	496	77					SLC2A11_ENST00000345044	0.376623	0.571429	0.0519481
C11orf61	507	77					C11orf61	0.142857	0.844156	0.012987
UBP1	540	77					UBP1	0.116883	0.87013	0.012987
DYRK1A_ENST00000321219	541	77	DYRK1A_ENST00000321219	0.0649351	0.74026	0.194805	DYRK1A_ENST00000321219	0.0649351	0.74026	0.194805
GLMN	594	77					GLMN	0.25974	0.623377	0.116883
CST1	141	76					CST1	0.421053	0.565789	0.0131579
GH1	217	76					GH1	0.394737	0.592105	0.0131579
FAM78A	283	76					FAM78A	0.421053	0.552632	0.0263158
C1orf110	302	76					C1orf110	0.0921053	0.894737	0.0131579
SULT6B1_ENST00000535679	303	76					SULT6B1_ENST00000535679	0.368421	0.526316	0.105263
FAM125B_ENST00000436593	304	76					FAM125B_ENST00000436593	0.381579	0.565789	0.0526316
TPRA1	373	76					TPRA1	0.394737	0.592105	0.0131579
RRAGB	374	76					RRAGB	0.118421	0.855263	0.0263158
TSSC1	387	76					TSSC1	0.355263	0.578947	0.0657895
FNTB	437	76					FNTB	0.315789	0.578947	0.105263
BSDC1	474	76					BSDC1	0.368421	0.578947	0.0526316
PPP2R5A	486	76					PPP2R5A	0.25	0.631579	0.118421
C9orf84_ENST00000374283	488	76					C9orf84_ENST00000374283	0.0921053	0.868421	0.0394737
ETV3_ENST00000368192	512	76	ETV3_ENST00000368192	0.210526	0.644737	0.144737	ETV3_ENST00000368192	0.210526	0.644737	0.144737
NUDCD1_ENST00000427660	554	76					NUDCD1_ENST00000427660	0.131579	0.736842	0.131579
HIST1H2BK	126	75					HIST1H2BK	0.4	0.573333	0.0266667
HIST1H2BK_ENST00000396891	126	75					HIST1H2BK_ENST00000396891	0.4	0.573333	0.0266667
CST8	142	75					CST8	0.293333	0.573333	0.133333
SSX3_ENST00000376893	170	75					SSX3_ENST00000376893	0.16	0.84	0
STARD4	205	75	STARD4	0.146667	0.706667	0.146667	STARD4	0.146667	0.706667	0.146667
CLDN9	217	75					CLDN9	0.413333	0.573333	0.0133333
MYOG	224	75					MYOG	0.413333	0.56	0.0266667
HOXC9	260	75					HOXC9	0.386667	0.6	0.0133333
RSPO3	272	75	RSPO3	0.146667	0.693333	0.16	RSPO3	0.146667	0.693333	0.16
RBM11	281	75					RBM11	0.16	0.706667	0.133333
PGC_ENST00000425343	315	75	PGC_ENST00000425343	0.453333	0.533333	0.0133333	PGC_ENST00000425343	0.453333	0.533333	0.0133333
SMG5_ENST00000368267	374	75					SMG5_ENST00000368267	0.2	0.666667	0.133333
ARMCX3	379	75					ARMCX3	0.2	0.68	0.12
CTH	405	75					CTH	0.146667	0.72	0.133333
RAPSN	412	75					RAPSN	0.4	0.6	0
CALCOCO2	446	75	CALCOCO2	0.306667	0.533333	0.16	CALCOCO2	0.306667	0.533333	0.16
RGS11	467	75					RGS11	0.386667	0.586667	0.0266667
ZNF207_ENST00000394670	494	75	ZNF207_ENST00000394670	0.04	0.906667	0.0533333	ZNF207_ENST00000394670	0.04	0.906667	0.0533333
RP11-108K14.4	1027	75					RP11-108K14.4	0.386667	0.573333	0.04
HSPD1_ENST00000544407	158	74					HSPD1_ENST00000544407	0.391892	0.567568	0.0405405
TMEM196_ENST00000405764	172	74					TMEM196_ENST00000405764	0.297297	0.567568	0.135135
RAB14	215	74	RAB14	0.567568	0.418919	0.0135135	RAB14	0.567568	0.418919	0.0135135
ASCL1	236	74					ASCL1	0.432432	0.554054	0.0135135
KRT222	295	74					KRT222	0.135135	0.743243	0.121622
B3GALT5_ENST00000380620	310	74					B3GALT5_ENST00000380620	0.351351	0.581081	0.0675676
NAPG	312	74					NAPG	0.0675676	0.851351	0.0810811
ABHD11	315	74					ABHD11	0.405405	0.594595	0
TAS2R40	323	74					TAS2R40	0.405405	0.581081	0.0135135
TAS2R40_ENST00000408947	323	74					TAS2R40_ENST00000408947	0.391892	0.581081	0.027027
GPR157	335	74					GPR157	0.378378	0.594595	0.027027
HIBADH	336	74					HIBADH	0.378378	0.581081	0.0405405
VEGFA_ENST00000482630	371	74					VEGFA_ENST00000482630	0.0675676	0.878378	0.0540541
CEP44	390	74					CEP44	0.108108	0.864865	0.027027
ASAH1_ENST00000381733	411	74					ASAH1_ENST00000381733	0.0810811	0.878378	0.0405405
PBX2	430	74					PBX2	0.148649	0.837838	0.0135135
VWA1	445	74					VWA1	0.405405	0.540541	0.0540541
AZIN1	448	74					AZIN1	0.175676	0.702703	0.121622
ASB16	453	74					ASB16	0.405405	0.581081	0.0135135
PUS3	481	74					PUS3	0.162162	0.716216	0.121622
DUX4L6	485	74	DUX4L6	0	0.972973	0.027027
HIATL1	506	74					HIATL1	0.337838	0.581081	0.0810811
CTAGE9	777	74					CTAGE9	0.0810811	0.891892	0.027027
CTAGE9_ENST00000314099	777	74					CTAGE9_ENST00000314099	0.0810811	0.891892	0.027027
HIST1H2BI	126	73					HIST1H2BI	0.39726	0.589041	0.0136986
HIST1H2AE	130	73	HIST1H2AE	0.452055	0.547945	0	HIST1H2AE	0.452055	0.547945	0
RCVRN	200	73					RCVRN	0.410959	0.547945	0.0410959
TIMP3	211	73					TIMP3	0.136986	0.849315	0.0136986
RPL10	214	73					RPL10	0.123288	0.876712	0
TPPP	219	73					TPPP	0.383562	0.575342	0.0410959
C20orf46	256	73					C20orf46	0.369863	0.575342	0.0547945
CITED2	270	73					CITED2	0.438356	0.561644	0
MAML3_ENST00000398940	276	73	MAML3_ENST00000398940	0.493151	0.493151	0.0136986	MAML3_ENST00000398940	0.493151	0.493151	0.0136986
STX2	287	73					STX2	0.136986	0.739726	0.123288
PILRA	303	73					PILRA	0.383562	0.589041	0.0273973
NUP35	326	73					NUP35	0.178082	0.69863	0.123288
HOXD1	328	73					HOXD1	0.0958904	0.863014	0.0410959
RCN1	331	73					RCN1	0.136986	0.863014	0
NIPAL3_ENST00000339255	368	73					NIPAL3_ENST00000339255	0.39726	0.589041	0.0136986
MTCH1	372	73					MTCH1	0.219178	0.657534	0.123288
SH2B3_ENST00000538307	373	73					SH2B3_ENST00000538307	0.0821918	0.876712	0.0410959
NIF3L1_ENST00000409020	377	73					NIF3L1_ENST00000409020	0.0958904	0.876712	0.0273973
ENSG00000254381	444	73	ENSG00000254381	0.479452	0.506849	0.0136986	ENSG00000254381	0.479452	0.506849	0.0136986
KCNE4	170	72					KCNE4	0.388889	0.597222	0.0138889
ORM1	201	72					ORM1	0.388889	0.597222	0.0138889
BCL2L10	204	72					BCL2L10	0.125	0.847222	0.0277778
SENP7_ENST00000394085	238	72					SENP7_ENST00000394085	0.0555556	0.902778	0.0416667
PSAPL1	253	72					PSAPL1	0.416667	0.555556	0.0277778
SFTPA1	263	72	SFTPA1	0.458333	0.541667	0	SFTPA1	0.458333	0.541667	0
CELA2A	269	72					CELA2A	0.444444	0.541667	0.0138889
LBX1	281	72					LBX1	0.402778	0.569444	0.0277778
SLC25A14	325	72					SLC25A14	0.347222	0.583333	0.0694444
AWAT2	333	72					AWAT2	0.361111	0.513889	0.125
TMEM144	345	72					TMEM144	0.236111	0.625	0.138889
ASAH1	395	72					ASAH1	0.0833333	0.875	0.0416667
MRPS31_ENST00000323563	395	72					MRPS31_ENST00000323563	0.111111	0.805556	0.0833333
FBRS_ENST00000395073	399	72					FBRS_ENST00000395073	0.416667	0.527778	0.0555556
FBXL14	418	72					FBXL14	0.402778	0.555556	0.0416667
MPI	423	72					MPI	0.347222	0.583333	0.0694444
ACAT1	427	72					ACAT1	0.0972222	0.875	0.0277778
KCNK12	430	72	KCNK12	0.430556	0.5	0.0694444	KCNK12	0.430556	0.5	0.0694444
DUX4L5	485	72	DUX4L5	0.0416667	0.930556	0.0277778	DUX4L5	0.0416667	0.930556	0.0277778
RP11-1286E23.13	530	72					RP11-1286E23.13	0.152778	0.833333	0.0138889
RBM24	191	71					RBM24	0.380282	0.577465	0.0422535
LHFP	200	71					LHFP	0.408451	0.56338	0.028169
UBB	229	71	UBB	0.591549	0.408451	0	UBB	0.591549	0.408451	0
MTA1_ENST00000435036	255	71					MTA1_ENST00000435036	0.126761	0.859155	0.0140845
KCTD15_ENST00000430256	283	71					KCTD15_ENST00000430256	0.422535	0.521127	0.056338
F3	295	71	F3	0.450704	0.521127	0.028169	F3	0.450704	0.521127	0.028169
LPAR6	344	71					LPAR6	0.380282	0.605634	0.0140845
MCU	351	71					MCU	0.112676	0.84507	0.0422535
LEFTY2	366	71					LEFTY2	0.366197	0.535211	0.0985915
SMS	366	71					SMS	0.225352	0.647887	0.126761
C2orf18	371	71					C2orf18	0.380282	0.591549	0.028169
C1orf159_ENST00000448924	380	71	C1orf159_ENST00000448924	0.507042	0.478873	0.0140845	C1orf159_ENST00000448924	0.507042	0.478873	0.0140845
RAGE	419	71					RAGE	0.366197	0.577465	0.056338
SGPP1	441	71					SGPP1	0.0985915	0.816901	0.084507
DUX4L3	485	71	DUX4L3	0.028169	0.971831	0	DUX4L3	0.028169	0.971831	0
GPR135	494	71					GPR135	0.140845	0.84507	0.0140845
CCDC30_ENST00000390640	572	71					CCDC30_ENST00000390640	0.15493	0.732394	0.112676
GOLGA6D	693	71					GOLGA6D	0.126761	0.84507	0.028169
NME2P1	137	70	NME2P1	0.6	0.4	0	NME2P1	0.6	0.4	0
TMEM37	190	70					TMEM37	0.414286	0.585714	0
DDIT4L	193	70					DDIT4L	0.285714	0.6	0.114286
HMGB3	200	70					HMGB3	0.385714	0.542857	0.0714286
TMEM8C	221	70					TMEM8C	0.385714	0.6	0.0142857
CHODL_ENST00000338326	236	70	CHODL_ENST00000338326	0.2	0.657143	0.142857	CHODL_ENST00000338326	0.2	0.657143	0.142857
ETFB_ENST00000309244	255	70					ETFB_ENST00000309244	0.371429	0.571429	0.0571429
RSPO3_ENST00000368317	292	70	RSPO3_ENST00000368317	0.142857	0.7	0.157143	RSPO3_ENST00000368317	0.142857	0.7	0.157143
GOLPH3	298	70					GOLPH3	0.114286	0.842857	0.0428571
RDH11	318	70	RDH11	0.414286	0.471429	0.114286	RDH11	0.414286	0.471429	0.114286
C20orf96_ENST00000382369	328	70					C20orf96_ENST00000382369	0.228571	0.642857	0.128571
CTSK	329	70	CTSK	0.271429	0.585714	0.142857	CTSK	0.271429	0.585714	0.142857
NEUROD2	382	70					NEUROD2	0.385714	0.6	0.0142857
TEX9	391	70					TEX9	0.0857143	0.828571	0.0857143
MRPS31	395	70					MRPS31	0.0857143	0.814286	0.1
B4GALT1	398	70					B4GALT1	0.442857	0.557143	0
KCNAB3	404	70					KCNAB3	0.271429	0.6	0.128571
EFHA1	434	70	EFHA1	0.2	0.642857	0.157143	EFHA1	0.2	0.642857	0.157143
ENSG00000268241	516	70					ENSG00000268241	0.414286	0.557143	0.0285714
SMARCD2_ENST00000448276	531	70	SMARCD2_ENST00000448276	0.214286	0.571429	0.214286	SMARCD2_ENST00000448276	0.214286	0.571429	0.214286
EPB41_ENST00000373797	720	70					EPB41_ENST00000373797	0.114286	0.871429	0.0142857
TCL1B	128	69					TCL1B	0.217391	0.652174	0.130435
KRTAP1-1	177	69					KRTAP1-1	0.391304	0.594203	0.0144928
IFNA5	189	69					IFNA5	0.362319	0.57971	0.057971
RAB6B	208	69	RAB6B	0.275362	0.57971	0.144928	RAB6B	0.275362	0.57971	0.144928
PDCD10	212	69					PDCD10	0.391304	0.536232	0.0724638
C20orf118	215	69					C20orf118	0.434783	0.521739	0.0434783
METTL8	241	69					METTL8	0.130435	0.753623	0.115942
NUCKS1	243	69					NUCKS1	0.101449	0.855072	0.0434783
SLC2A1_ENST00000439722	248.667	69					SLC2A1_ENST00000439722	0.405797	0.594203	0
DCUN1D1	259	69					DCUN1D1	0.15942	0.710145	0.130435
MSX2	267	69					MSX2	0.42029	0.536232	0.0434783
DGUOK	277	69					DGUOK	0.173913	0.710145	0.115942
RGS3_ENST00000462403	311	69					RGS3_ENST00000462403	0.15942	0.84058	0
DEGS1	323	69					DEGS1	0.101449	0.884058	0.0144928
PSIP1	333	69	PSIP1	0.15942	0.623188	0.217391	PSIP1	0.15942	0.623188	0.217391
PAQR7	346	69					PAQR7	0.405797	0.57971	0.0144928
DTNBP1_ENST00000355917	352	69					DTNBP1_ENST00000355917	0.362319	0.550725	0.0869565
CDK5R2	367	69					CDK5R2	0.391304	0.594203	0.0144928
PGA5_ENST00000312403	388	69					PGA5_ENST00000312403	0.405797	0.57971	0.0144928
ASAH1_ENST00000314146	389	69					ASAH1_ENST00000314146	0.101449	0.855072	0.0434783
GABPB1	395	69					GABPB1	0.0724638	0.855072	0.0724638
GABPB1_ENST00000220429	395	69					GABPB1_ENST00000220429	0.0724638	0.869565	0.057971
CC2D2B_ENST00000451649	401	69					CC2D2B_ENST00000451649	0.289855	0.594203	0.115942
AKAP5	427	69					AKAP5	0.347826	0.57971	0.0724638
USP16_ENST00000535828	452	69					USP16_ENST00000535828	0.115942	0.855072	0.0289855
SLC38A9_ENST00000539768	462	69					SLC38A9_ENST00000539768	0.144928	0.855072	0
UFSP2	469	69					UFSP2	0.101449	0.855072	0.0434783
PMPCB	489	69					PMPCB	0.130435	0.84058	0.0289855
ZBTB10_ENST00000379091	579	69					ZBTB10_ENST00000379091	0.101449	0.855072	0.0434783
KBTBD11	623	69					KBTBD11	0.144928	0.855072	0
ZFY	801	69					ZFY	0.0869565	0.782609	0.130435
SH2D1A	128	68					SH2D1A	0.117647	0.838235	0.0441176
CFL2	166	68	CFL2	0.588235	0.411765	0	CFL2	0.588235	0.411765	0
RBM24_ENST00000379052	236	68					RBM24_ENST00000379052	0.426471	0.529412	0.0441176
H2BFM_ENST00000243297	257	68					H2BFM_ENST00000243297	0.147059	0.838235	0.0147059
UCK2	261	68					UCK2	0.397059	0.529412	0.0735294
TTC33	262	68	TTC33	0.161765	0.691176	0.147059	TTC33	0.161765	0.691176	0.147059
ZDHHC21	265	68	ZDHHC21	0.470588	0.5	0.0294118	ZDHHC21	0.470588	0.5	0.0294118
ISY1	285	68					ISY1	0.235294	0.632353	0.132353
LACTB2	288	68	LACTB2	0.176471	0.661765	0.161765	LACTB2	0.176471	0.661765	0.161765
MLF1_ENST00000392822	299	68	MLF1_ENST00000392822	0.132353	0.676471	0.191176	MLF1_ENST00000392822	0.132353	0.676471	0.191176
PPIE	301	68					PPIE	0.132353	0.852941	0.0147059
ZDHHC19	309	68					ZDHHC19	0.397059	0.544118	0.0588235
NPDC1	325	68					NPDC1	0.382353	0.602941	0.0147059
RP11-702L15.2	331	68					RP11-702L15.2	0.352941	0.558824	0.0882353
RP11-702L15.2_ENST00000416172	331	68					RP11-702L15.2_ENST00000416172	0.352941	0.558824	0.0882353
B4GALT4	344	68					B4GALT4	0.382353	0.544118	0.0735294
NIF3L1	350	68					NIF3L1	0.0882353	0.882353	0.0294118
GALR3	368	68	GALR3	0.485294	0.470588	0.0441176	GALR3	0.485294	0.470588	0.0441176
TMEM194A	371	68	TMEM194A	0.191176	0.661765	0.147059	TMEM194A	0.191176	0.661765	0.147059
PRSS23	383	68					PRSS23	0.191176	0.691176	0.117647
C2orf69	385	68					C2orf69	0.132353	0.838235	0.0294118
BSDC1_ENST00000446293	447	68					BSDC1_ENST00000446293	0.397059	0.573529	0.0294118
BZW1_ENST00000452790	451	68	BZW1_ENST00000452790	0.0588235	0.911765	0.0294118	BZW1_ENST00000452790	0.0588235	0.911765	0.0294118
KDM4E	506	68					KDM4E	0.220588	0.661765	0.117647
KDM4E_ENST00000450979	506	68					KDM4E_ENST00000450979	0.220588	0.661765	0.117647
TSEN54	526	68	TSEN54	0.411765	0.5	0.0882353	TSEN54	0.411765	0.5	0.0882353
ATRN_ENST00000446916	1272	68					ATRN_ENST00000446916	0.117647	0.838235	0.0441176
NPAS3_ENST00000341321	257	67					NPAS3_ENST00000341321	0.134328	0.850746	0.0149254
CELA2B	269	67					CELA2B	0.432836	0.507463	0.0597015
KLF6	283	67	KLF6	0.208955	0.641791	0.149254	KLF6	0.208955	0.641791	0.149254
SLC25A6_ENST00000381401	298	67					SLC25A6_ENST00000381401	0.432836	0.537313	0.0298507
RRAD	308	67					RRAD	0.119403	0.865672	0.0149254
PPP1R42	309	67					PPP1R42	0.134328	0.850746	0.0149254
C9orf100_ENST00000378387	335	67					C9orf100_ENST00000378387	0.164179	0.835821	0
C11orf49	337	67					C11orf49	0.343284	0.552239	0.104478
POLR1C_ENST00000304004	342	67					POLR1C_ENST00000304004	0.179104	0.701493	0.119403
ARMC10	343	67					ARMC10	0.328358	0.552239	0.119403
HMX1	348	67					HMX1	0.104478	0.820896	0.0746269
DTNBP1	351	67					DTNBP1	0.358209	0.522388	0.119403
PEX13	403	67					PEX13	0.0895522	0.895522	0.0149254
SCRN3_ENST00000409673	417	67					SCRN3_ENST00000409673	0.104478	0.865672	0.0298507
NAA16_ENST00000403412	429	67					NAA16_ENST00000403412	0.179104	0.701493	0.119403
TSPYL1	437	67					TSPYL1	0.208955	0.671642	0.119403
ARHGAP1	439	67					ARHGAP1	0.402985	0.58209	0.0149254
SMARCD1_ENST00000394963	515	67					SMARCD1_ENST00000394963	0.0597015	0.80597	0.134328
TCEB3CL2	546	67					TCEB3CL2	0.104478	0.835821	0.0597015
CST2	141	66					CST2	0.333333	0.545455	0.121212
LAIR2	152	66					LAIR2	0.393939	0.560606	0.0454545
DHRS4L2	232	66					DHRS4L2	0.378788	0.621212	0
FAM71E1_ENST00000391816	247	66					FAM71E1_ENST00000391816	0.439394	0.545455	0.0151515
UPK1A	258	66					UPK1A	0.393939	0.560606	0.0454545
SLC19A1_ENST00000380014	281	66					SLC19A1_ENST00000380014	0.378788	0.621212	0
ERGIC1	290	66	ERGIC1	0.439394	0.484848	0.0757576	ERGIC1	0.439394	0.484848	0.0757576
KIF6_ENST00000541946	293	66					KIF6_ENST00000541946	0.378788	0.606061	0.0151515
HNRNPAB	332	66	HNRNPAB	0.257576	0.560606	0.181818	HNRNPAB	0.257576	0.560606	0.181818
BTN3A1_ENST00000476549	352	66					BTN3A1_ENST00000476549	0.409091	0.545455	0.0454545
MTCH1_ENST00000373550	357	66					MTCH1_ENST00000373550	0.257576	0.621212	0.121212
ZNF24	368	66					ZNF24	0.136364	0.833333	0.030303
LIPN	398	66					LIPN	0.136364	0.742424	0.121212
TERF2IP	399	66					TERF2IP	0.136364	0.833333	0.030303
RUFY1_ENST00000377001	412	66					RUFY1_ENST00000377001	0.151515	0.833333	0.0151515
IPMK	416	66					IPMK	0.19697	0.681818	0.121212
COQ2	421	66					COQ2	0.166667	0.833333	0
CCRN4L	431	66					CCRN4L	0.393939	0.530303	0.0757576
TUBB2B	445	66					TUBB2B	0.393939	0.606061	0
NFYC_ENST00000308733	458	66					NFYC_ENST00000308733	0.19697	0.681818	0.121212
LOC389901	475	66					LOC389901	0.424242	0.575758	0
FAM200B	657	66					FAM200B	0.106061	0.833333	0.0606061
FAM200B_ENST00000422728	657	66					FAM200B_ENST00000422728	0.106061	0.833333	0.0606061
TXNRD3	698	66					TXNRD3	0.166667	0.833333	0
TMEM196	104	65	TMEM196	0.215385	0.6	0.184615	TMEM196	0.215385	0.6	0.184615
CDKN2C	168	65	CDKN2C	0.0153846	0.830769	0.153846	CDKN2C	0.0153846	0.830769	0.153846
LCN9	189	65					LCN9	0.4	0.584615	0.0153846
KRTAP4-9_ENST00000377734	198	65					KRTAP4-9_ENST00000377734	0.123077	0.861538	0.0153846
MAD2L1	205	65					MAD2L1	0.138462	0.738462	0.123077
MDM4_ENST00000367179	212.333	65					MDM4_ENST00000367179	0.107692	0.846154	0.0461538
FGF17	216	65					FGF17	0.384615	0.615385	0
SLC17A4_ENST00000397076	221	65					SLC17A4_ENST00000397076	0.430769	0.569231	0
LRRC67	228	65					LRRC67	0.123077	0.876923	0
GSTO2	243	65					GSTO2	0.107692	0.830769	0.0615385
DDX39A_ENST00000454233	267	65					DDX39A_ENST00000454233	0.4	0.569231	0.0307692
MLF1_ENST00000355893	268	65	MLF1_ENST00000355893	0.153846	0.646154	0.2	MLF1_ENST00000355893	0.153846	0.646154	0.2
OLR1	273	65					OLR1	0.184615	0.692308	0.123077
MRPS2	296	65					MRPS2	0.384615	0.6	0.0153846
APEX1	318	65					APEX1	0.307692	0.553846	0.138462
ASB7	318	65					ASB7	0.153846	0.723077	0.123077
JKAMP	321	65					JKAMP	0.107692	0.784615	0.107692
SCAMP2	329	65					SCAMP2	0.338462	0.553846	0.107692
PRKAG1	331	65					PRKAG1	0.123077	0.753846	0.123077
IL9R_ENST00000369423	342	65					IL9R_ENST00000369423	0.338462	0.553846	0.107692
ABHD5	349	65	ABHD5	0.276923	0.553846	0.169231	ABHD5	0.276923	0.553846	0.169231
HOMER1	354	65					HOMER1	0.153846	0.723077	0.123077
HNRNPD	355	65	HNRNPD	0.230769	0.584615	0.184615	HNRNPD	0.230769	0.584615	0.184615
ZMYM5	382	65					ZMYM5	0.107692	0.861538	0.0307692
ATAT1_ENST00000330083	409	65					ATAT1_ENST00000330083	0.369231	0.553846	0.0769231
FOXD4L3	417	65	FOXD4L3	0.0769231	0.923077	0	FOXD4L3	0.0769231	0.923077	0
SNAP47_ENST00000315781	446	65					SNAP47_ENST00000315781	0.384615	0.584615	0.0307692
RUFY3_ENST00000536664	453	65					RUFY3_ENST00000536664	0.261538	0.615385	0.123077
C16orf73_ENST00000412554	471	65					C16orf73_ENST00000412554	0.184615	0.692308	0.123077
MCAM_ENST00000392814	527	65					MCAM_ENST00000392814	0.384615	0.584615	0.0307692
IQSEC1_ENST00000450726	937	65					IQSEC1_ENST00000450726	0.384615	0.615385	0
LGALS14_ENST00000392052	139	64					LGALS14_ENST00000392052	0.375	0.5625	0.0625
GNAQ_ENST00000411677	169	64					GNAQ_ENST00000411677	0.09375	0.78125	0.125
FIBIN	211	64					FIBIN	0.390625	0.59375	0.015625
NMNAT3	215	64	NMNAT3	0.328125	0.515625	0.15625	NMNAT3	0.328125	0.515625	0.15625
C3orf56	242	64					C3orf56	0.390625	0.578125	0.03125
DLX1	255	64	DLX1	0.484375	0.515625	0	DLX1	0.484375	0.515625	0
HLA-DQA1	255	64					HLA-DQA1	0.40625	0.5625	0.03125
C11orf49_ENST00000378618	326	64					C11orf49_ENST00000378618	0.328125	0.578125	0.09375
FLAD1_ENST00000405236	338	64					FLAD1_ENST00000405236	0.109375	0.796875	0.09375
TCEAL4	358	64					TCEAL4	0.09375	0.859375	0.046875
DALRD3	376	64					DALRD3	0.21875	0.640625	0.140625
NPRL2	380	64					NPRL2	0.203125	0.65625	0.140625
PGA4_ENST00000422676	388	64					PGA4_ENST00000422676	0.390625	0.59375	0.015625
ZDHHC6	413	64					ZDHHC6	0.109375	0.796875	0.09375
HEXB	556	64					HEXB	0.0625	0.8125	0.125
HIST1H2BB	126	63					HIST1H2BB	0.396825	0.587302	0.015873
DEFB125	156	63					DEFB125	0.111111	0.825397	0.0634921
PRTFDC1	225	63					PRTFDC1	0.412698	0.587302	0
CUL4B_ENST00000371323	233.333	63	CUL4B_ENST00000371323	0.111111	0.746032	0.142857	CUL4B_ENST00000371323	0.111111	0.746032	0.142857
ECE2_ENST00000324557	255	63					ECE2_ENST00000324557	0.111111	0.809524	0.0793651
SLC2A8_ENST00000423934	266.333	63	SLC2A8_ENST00000423934	0.492063	0.492063	0.015873	SLC2A8_ENST00000423934	0.492063	0.492063	0.015873
CAPNS1	268	63					CAPNS1	0.365079	0.571429	0.0634921
HOXB5	269	63					HOXB5	0.396825	0.587302	0.015873
CECR1_ENST00000330232	270	63					CECR1_ENST00000330232	0.111111	0.825397	0.0634921
IL1A	271	63	IL1A	0.253968	0.603175	0.142857	IL1A	0.253968	0.603175	0.142857
ATG5	275	63	ATG5	0.0793651	0.746032	0.174603	ATG5	0.0793651	0.746032	0.174603
LOC349136	277	63					LOC349136	0.15873	0.84127	0
VDAC1	283	63					VDAC1	0.253968	0.619048	0.126984
COLQ_ENST00000383785	291	63	COLQ_ENST00000383785	0.238095	0.539683	0.222222	COLQ_ENST00000383785	0.238095	0.539683	0.222222
IGFBP3	291	63					IGFBP3	0.126984	0.857143	0.015873
PPP1R3D	299	63					PPP1R3D	0.444444	0.555556	0
TAS2R42	314	63					TAS2R42	0.349206	0.539683	0.111111
FBXO8	319	63	FBXO8	0.269841	0.571429	0.15873	FBXO8	0.269841	0.571429	0.15873
BRMS1L	323	63					BRMS1L	0.111111	0.873016	0.015873
FLJ14627	330	63					FLJ14627	0.428571	0.52381	0.047619
NFYC	335	63					NFYC	0.222222	0.650794	0.126984
CSNK2A2_ENST00000262506	350	63					CSNK2A2_ENST00000262506	0.0952381	0.793651	0.111111
BZW1	353	63					BZW1	0.0793651	0.873016	0.047619
CYHR1_ENST00000438911	362	63					CYHR1_ENST00000438911	0.380952	0.603175	0.015873
SEPT7_ENST00000494488	381	63					SEPT7_ENST00000494488	0.428571	0.571429	0
FUCA1	466	63					FUCA1	0.126984	0.857143	0.015873
ANKRD28	520	63					ANKRD28	0.15873	0.84127	0
HIST1H2BE	126	62					HIST1H2BE	0.387097	0.612903	0
LCN1	176	62					LCN1	0.33871	0.548387	0.112903
RGS19	217	62					RGS19	0.419355	0.548387	0.0322581
CLDN8	225	62					CLDN8	0.387097	0.564516	0.0483871
FAM71E1	231	62					FAM71E1	0.419355	0.564516	0.016129
LAPTM5	262	62					LAPTM5	0.370968	0.580645	0.0483871
ARGLU1	273	62					ARGLU1	0.225806	0.66129	0.112903
NRIP2	281	62					NRIP2	0.387097	0.580645	0.0322581
CAPZA1	286	62					CAPZA1	0.0967742	0.887097	0.016129
CAPZA2	286	62	CAPZA2	0.193548	0.645161	0.16129	CAPZA2	0.193548	0.645161	0.16129
ROGDI	287	62					ROGDI	0.322581	0.580645	0.0967742
CCDC137	289	62	CCDC137	0.209677	0.645161	0.145161	CCDC137	0.209677	0.645161	0.145161
PIR	290	62					PIR	0.370968	0.580645	0.0483871
NAPB	298	62	NAPB	0.258065	0.596774	0.145161	NAPB	0.258065	0.596774	0.145161
CDKL4_ENST00000378803	315	62					CDKL4_ENST00000378803	0.129032	0.83871	0.0322581
PINX1	328	62					PINX1	0.209677	0.677419	0.112903
C3orf38	329	62					C3orf38	0.129032	0.83871	0.0322581
DUSP12	340	62					DUSP12	0.177419	0.693548	0.129032
PRSS8	343	62					PRSS8	0.370968	0.580645	0.0483871
LUC7L3_ENST00000544170	356	62	LUC7L3_ENST00000544170	0.0806452	0.741935	0.177419	LUC7L3_ENST00000544170	0.0806452	0.741935	0.177419
WISP3	372	62	WISP3	0.177419	0.66129	0.16129	WISP3	0.177419	0.66129	0.16129
SOX18	384	62					SOX18	0.129032	0.870968	0
GRAMD1C_ENST00000452134	391	62	GRAMD1C_ENST00000452134	0.0483871	0.806452	0.145161	GRAMD1C_ENST00000452134	0.0483871	0.806452	0.145161
STIM2_ENST00000412829	686	62					STIM2_ENST00000412829	0.209677	0.66129	0.129032
KRTAP19-5	72	61					KRTAP19-5	0.114754	0.868852	0.0163934
C20orf85	137	61					C20orf85	0.360656	0.57377	0.0655738
FAM174B	159	61					FAM174B	0.0983607	0.901639	0
TM4SF5	197	61	TM4SF5	0.442623	0.491803	0.0655738	TM4SF5	0.442623	0.491803	0.0655738
RAB3D	219	61					RAB3D	0.393443	0.557377	0.0491803
ENSG00000172901	226	61					ENSG00000172901	0.131148	0.836066	0.0327869
NOTCH2_ENST00000369342	236	61	NOTCH2_ENST00000369342	0.229508	0.508197	0.262295	NOTCH2_ENST00000369342	0.229508	0.508197	0.262295
TSPAN18	248	61	TSPAN18	0.459016	0.52459	0.0163934	TSPAN18	0.459016	0.52459	0.0163934
DGUOK_ENST00000356837	255	61					DGUOK_ENST00000356837	0.180328	0.688525	0.131148
SRSF12	261	61					SRSF12	0.147541	0.721311	0.131148
CD82_ENST00000227155	267	61					CD82_ENST00000227155	0.393443	0.590164	0.0163934
ZDHHC12	267	61	ZDHHC12	0.442623	0.47541	0.0819672	ZDHHC12	0.442623	0.47541	0.0819672
PSMB10	273	61	PSMB10	0.491803	0.491803	0.0163934	PSMB10	0.491803	0.491803	0.0163934
KIF27_ENST00000376347	286	61					KIF27_ENST00000376347	0.131148	0.754098	0.114754
TXNL1	289	61	TXNL1	0.114754	0.721311	0.163934	TXNL1	0.114754	0.721311	0.163934
LYSMD4	297	61					LYSMD4	0.262295	0.622951	0.114754
TAF5L	325	61					TAF5L	0.377049	0.508197	0.114754
SGIP1_ENST00000435165	333	61					SGIP1_ENST00000435165	0.0655738	0.836066	0.0983607
WDR5	334	61	WDR5	0.47541	0.508197	0.0163934	WDR5	0.47541	0.508197	0.0163934
GLRX3	335	61					GLRX3	0.213115	0.672131	0.114754
TXNL2	335	61					TXNL2	0.213115	0.672131	0.114754
RFC5	340	61					RFC5	0.213115	0.672131	0.114754
NOXO1	371	61					NOXO1	0.393443	0.606557	0
IST1	379	61					IST1	0.131148	0.852459	0.0163934
PELO	385	61					PELO	0.344262	0.57377	0.0819672
TRIM64B	449	61					TRIM64B	0.163934	0.836066	0
DGKB_ENST00000406247	773	61					DGKB_ENST00000406247	0.0983607	0.836066	0.0655738
DEFB112	113	60					DEFB112	0.0666667	0.85	0.0833333
FSHB	129	60					FSHB	0.333333	0.55	0.116667
HPCAL1	193	60	HPCAL1	0.483333	0.516667	0	HPCAL1	0.483333	0.516667	0
RNASE11	199	60					RNASE11	0.1	0.833333	0.0666667
MPZL2	215	60					MPZL2	0.133333	0.833333	0.0333333
MAPK1IP1L	245	60					MAPK1IP1L	0.15	0.85	0
RBM7	266	60					RBM7	0.1	0.8	0.1
TSPAN14	270	60					TSPAN14	0.4	0.566667	0.0333333
FAM125A	273	60					FAM125A	0.383333	0.6	0.0166667
FAM78A_ENST00000372269	280	60	FAM78A_ENST00000372269	0.466667	0.533333	0	FAM78A_ENST00000372269	0.466667	0.533333	0
FGD4_ENST00000381025	280	60	FGD4_ENST00000381025	0.233333	0.616667	0.15	FGD4_ENST00000381025	0.233333	0.616667	0.15
SRM	302	60					SRM	0.316667	0.566667	0.116667
GNPTG	305	60					GNPTG	0.4	0.566667	0.0333333
UBAP2_ENST00000379225	325	60	UBAP2_ENST00000379225	0.266667	0.583333	0.15	UBAP2_ENST00000379225	0.266667	0.583333	0.15
POLB	335	60					POLB	0.116667	0.833333	0.05
SFXN4	337	60					SFXN4	0.266667	0.6	0.133333
GMPR2	348	60					GMPR2	0.2	0.683333	0.116667
DIS3L2_ENST00000360410	356	60					DIS3L2_ENST00000360410	0.266667	0.616667	0.116667
GABPB1_ENST00000429662	360	60	GABPB1_ENST00000429662	0.0666667	0.916667	0.0166667	GABPB1_ENST00000429662	0.0666667	0.916667	0.0166667
SUGT1_ENST00000343788	365	60					SUGT1_ENST00000343788	0.2	0.666667	0.133333
EXOG	368	60					EXOG	0.25	0.616667	0.133333
CTBS	385	60					CTBS	0.116667	0.883333	0
MSL1	413	60					MSL1	0.316667	0.566667	0.116667
UCKL1_ENST00000358711	419	60					UCKL1_ENST00000358711	0.366667	0.583333	0.05
FAM181B	426	60	FAM181B	0.466667	0.483333	0.05	FAM181B	0.466667	0.483333	0.05
FUT11	492	60					FUT11	0.183333	0.7	0.116667
ZSCAN30	494	60					ZSCAN30	0.133333	0.85	0.0166667
ZNF484_ENST00000395506	854	60					ZNF484_ENST00000395506	0.116667	0.833333	0.05
C12orf74	190	59					C12orf74	0.40678	0.508475	0.0847458
CDH13_ENST00000431540	190	59					CDH13_ENST00000431540	0.355932	0.542373	0.101695
AC005609.1	192	59					AC005609.1	0.389831	0.576271	0.0338983
AC005609.1_ENST00000502505	192	59					AC005609.1_ENST00000502505	0.389831	0.576271	0.0338983
ENSG00000249034	192	59					ENSG00000249034	0.389831	0.576271	0.0338983
Q8NB83_HUMAN	192	59					Q8NB83_HUMAN	0.389831	0.576271	0.0338983
ZNF534	193	59					ZNF534	0.423729	0.576271	0
ENSG00000204850	203	59	ENSG00000204850	0.457627	0.542373	0	ENSG00000204850	0.457627	0.542373	0
ROPN1B	212	59					ROPN1B	0.389831	0.610169	0
FKBP3	224	59					FKBP3	0.101695	0.830508	0.0677966
C11orf70	229	59					C11orf70	0.0677966	0.864407	0.0677966
MOSPD3	235	59					MOSPD3	0.338983	0.559322	0.101695
FAM78A_ENST00000464831	252	59	FAM78A_ENST00000464831	0.491525	0.508475	0	FAM78A_ENST00000464831	0.491525	0.508475	0
FBXO44	255	59					FBXO44	0.423729	0.508475	0.0677966
EGFL7	273	59					EGFL7	0.118644	0.847458	0.0338983
CDK2	298	59					CDK2	0.118644	0.864407	0.0169492
ECI1	302	59					ECI1	0.338983	0.576271	0.0847458
DTNBP1_ENST00000338950	303	59					DTNBP1_ENST00000338950	0.305085	0.559322	0.135593
OR52A4	304	59					OR52A4	0.389831	0.559322	0.0508475
HSP90AA2	310	59					HSP90AA2	0.423729	0.559322	0.0169492
SPDYA_ENST00000334056	313	59					SPDYA_ENST00000334056	0.135593	0.847458	0.0169492
CCDC160	325	59					CCDC160	0.135593	0.847458	0.0169492
ATPAF1	328	59					ATPAF1	0.389831	0.59322	0.0169492
ERI2	328	59	ERI2	0.135593	0.694915	0.169492	ERI2	0.135593	0.694915	0.169492
KIAA1704	340	59					KIAA1704	0.101695	0.864407	0.0338983
ALG9	447	59					ALG9	0.322034	0.559322	0.118644
USP17L13	530	59					USP17L13	0.135593	0.864407	0
ZBED5	693	59					ZBED5	0.0677966	0.847458	0.0847458
ZBED5_ENST00000432999	693	59					ZBED5_ENST00000432999	0.0677966	0.847458	0.0847458
RFX7_ENST00000317318	1373	59					RFX7_ENST00000317318	0.101695	0.881356	0.0169492
DEFB118	123	58					DEFB118	0.224138	0.655172	0.12069
IQCF3	154	58					IQCF3	0.137931	0.844828	0.0172414
RHEB	184	58					RHEB	0.0689655	0.793103	0.137931
C9orf129	196	58					C9orf129	0.396552	0.603448	0
MYL4	197	58	MYL4	0.431034	0.482759	0.0862069	MYL4	0.431034	0.482759	0.0862069
CLEC3B	202	58					CLEC3B	0.310345	0.551724	0.137931
ENSG00000164946	222	58					ENSG00000164946	0.327586	0.568966	0.103448
IGFBP6	240	58					IGFBP6	0.206897	0.672414	0.12069
REEP2	252	58	REEP2	0.586207	0.396552	0.0172414	REEP2	0.586207	0.396552	0.0172414
ZNF511	252	58					ZNF511	0.293103	0.586207	0.12069
CMTM1_ENST00000379500	286	58	CMTM1_ENST00000379500	0.465517	0.534483	0	CMTM1_ENST00000379500	0.465517	0.534483	0
PPIE_ENST00000356511	296	58					PPIE_ENST00000356511	0.103448	0.87931	0.0172414
MPST	297	58					MPST	0.362069	0.568966	0.0689655
PPTC7	304	58					PPTC7	0.0862069	0.827586	0.0862069
LRRC25	305	58					LRRC25	0.431034	0.534483	0.0344828
PRSS48_ENST00000455694	328	58					PRSS48_ENST00000455694	0.137931	0.862069	0
NEIL2	332	58					NEIL2	0.396552	0.568966	0.0344828
GMPR2_ENST00000420554	366	58					GMPR2_ENST00000420554	0.189655	0.689655	0.12069
LPGAT1	370	58					LPGAT1	0.103448	0.844828	0.0517241
ZDHHC16	377	58					ZDHHC16	0.12069	0.862069	0.0172414
CCNJ_ENST00000419934	383	58					CCNJ_ENST00000419934	0.37931	0.586207	0.0344828
SAV1	383	58	SAV1	0.172414	0.603448	0.224138	SAV1	0.172414	0.603448	0.224138
NPTN_ENST00000545878	394	58					NPTN_ENST00000545878	0.396552	0.586207	0.0172414
PLA2G6_ENST00000451461	432	58					PLA2G6_ENST00000451461	0.37931	0.62069	0
UTY_ENST00000329134	1079	58					UTY_ENST00000329134	0.189655	0.672414	0.137931
HIST1H4L	103	57					HIST1H4L	0.385965	0.596491	0.0175439
LCE2D	110	57					LCE2D	0.105263	0.894737	0
ENSG00000220575	150	57					ENSG00000220575	0.333333	0.578947	0.0877193
SIRPB2_ENST00000381630	207	57	SIRPB2_ENST00000381630	0.403509	0.491228	0.105263	SIRPB2_ENST00000381630	0.403509	0.491228	0.105263
TMEM204	226	57					TMEM204	0.421053	0.561404	0.0175439
MSRA	235	57					MSRA	0.368421	0.578947	0.0526316
PIGL	252	57					PIGL	0.122807	0.842105	0.0350877
TMEM101	257	57					TMEM101	0.385965	0.578947	0.0350877
LAT	262	57					LAT	0.403509	0.596491	0
DRAM2	266	57					DRAM2	0.385965	0.54386	0.0701754
ENSG00000180715	271	57					ENSG00000180715	0.0877193	0.842105	0.0701754
OAF	273	57					OAF	0.298246	0.561404	0.140351
POLR2C	275	57	POLR2C	0.263158	0.561404	0.175439	POLR2C	0.263158	0.561404	0.175439
SOX21	276	57					SOX21	0.368421	0.578947	0.0526316
TEF	303	57					TEF	0.385965	0.578947	0.0350877
RIBC2	309	57					RIBC2	0.403509	0.54386	0.0526316
WDR33_ENST00000409658	326	57					WDR33_ENST00000409658	0.245614	0.631579	0.122807
CCDC104	342	57					CCDC104	0.122807	0.736842	0.140351
ADRA1A_ENST00000380587	370	57	ADRA1A_ENST00000380587	0.45614	0.491228	0.0526316	ADRA1A_ENST00000380587	0.45614	0.491228	0.0526316
FAM54A	385	57					FAM54A	0.22807	0.649123	0.122807
PRIM1	420	57					PRIM1	0.192982	0.684211	0.122807
UTY_ENST00000540140	1005	57	UTY_ENST00000540140	0.157895	0.666667	0.175439	UTY_ENST00000540140	0.157895	0.666667	0.175439
HIST1H2BJ	126	56					HIST1H2BJ	0.410714	0.589286	0
HIST1H2BN	126	56					HIST1H2BN	0.410714	0.571429	0.0178571
HIST1H2AH	128	56					HIST1H2AH	0.392857	0.607143	0
CST9L	147	56					CST9L	0.392857	0.607143	0
COX4I2	171	56	COX4I2	0.25	0.589286	0.160714	COX4I2	0.25	0.589286	0.160714
TCTEX1D1	179	56					TCTEX1D1	0.107143	0.857143	0.0357143
HPCAL4	191	56					HPCAL4	0.446429	0.535714	0.0178571
NPVF	196	56					NPVF	0.375	0.553571	0.0714286
GLTP	209	56					GLTP	0.392857	0.553571	0.0535714
TNNI3	210	56					TNNI3	0.142857	0.857143	0
CSNK2B	215	56	CSNK2B	0.0535714	0.589286	0.357143	CSNK2B	0.0535714	0.589286	0.357143
FAM64A	238	56					FAM64A	0.178571	0.696429	0.125
TMCO1_ENST00000367881	239	56					TMCO1_ENST00000367881	0.0714286	0.875	0.0535714
RASSF5_ENST00000304534	265	56					RASSF5_ENST00000304534	0.392857	0.589286	0.0178571
ZFAND1	268	56	ZFAND1	0.232143	0.571429	0.196429	ZFAND1	0.232143	0.571429	0.196429
ACP6_ENST00000392988	271	56					ACP6_ENST00000392988	0.125	0.839286	0.0357143
DNAJB14	294	56					DNAJB14	0.0714286	0.839286	0.0892857
CENPO	300	56					CENPO	0.375	0.571429	0.0535714
PLEKHA3	300	56					PLEKHA3	0.214286	0.660714	0.125
SLC25A20	301	56					SLC25A20	0.196429	0.678571	0.125
PRKRA	313	56					PRKRA	0.0892857	0.803571	0.107143
LDHA	332	56					LDHA	0.125	0.839286	0.0357143
NFYC_ENST00000425457	354	56	NFYC_ENST00000425457	0.214286	0.642857	0.142857	NFYC_ENST00000425457	0.214286	0.642857	0.142857
KLF2	355	56					KLF2	0.142857	0.839286	0.0178571
SNUPN	360	56					SNUPN	0.107143	0.839286	0.0535714
C9orf173	386	56					C9orf173	0.428571	0.553571	0.0178571
C9orf140	394	56					C9orf140	0.267857	0.607143	0.125
PPP2R5A_ENST00000537030	429	56					PPP2R5A_ENST00000537030	0.285714	0.589286	0.125
POU3F1	451	56					POU3F1	0.392857	0.607143	0
L3MBTL4_ENST00000400104	534	56					L3MBTL4_ENST00000400104	0.214286	0.660714	0.125
ENSG00000214279	693	56					ENSG00000214279	0.357143	0.571429	0.0714286
DPPA5	116	55					DPPA5	0.4	0.563636	0.0363636
HIST2H2AB	130	55					HIST2H2AB	0.418182	0.581818	0
IQCF3_ENST00000456080	154	55					IQCF3_ENST00000456080	0.145455	0.836364	0.0181818
SDHD	159	55					SDHD	0.0909091	0.854545	0.0545455
CNIH3	160	55					CNIH3	0.4	0.545455	0.0545455
CFL2_ENST00000298159	166	55	CFL2_ENST00000298159	0.672727	0.327273	0	CFL2_ENST00000298159	0.672727	0.327273	0
NMU	174	55	NMU	0.309091	0.545455	0.145455	NMU	0.309091	0.545455	0.145455
APOBEC3H	183	55					APOBEC3H	0.0909091	0.890909	0.0181818
MBP_ENST00000382582	197	55					MBP_ENST00000382582	0.163636	0.836364	0
CLEC7A	201	55					CLEC7A	0.127273	0.854545	0.0181818
RGS16	202	55					RGS16	0.109091	0.872727	0.0181818
HMGB1	215	55					HMGB1	0.381818	0.618182	0
CLDN2	230	55					CLDN2	0.145455	0.836364	0.0181818
TREM2	230	55	TREM2	0.454545	0.527273	0.0181818	TREM2	0.454545	0.527273	0.0181818
DLX4	240	55					DLX4	0.4	0.527273	0.0727273
SNAP29	258	55	SNAP29	0.290909	0.563636	0.145455	SNAP29	0.290909	0.563636	0.145455
TMEM111	261	55					TMEM111	0.381818	0.618182	0
NQO1	274	55	NQO1	0.127273	0.727273	0.145455	NQO1	0.127273	0.727273	0.145455
CYB5R3	278	55					CYB5R3	0.163636	0.836364	0
PHLDB3	279	55					PHLDB3	0.127273	0.745455	0.127273
KLF6_ENST00000469435	281	55					KLF6_ENST00000469435	0.218182	0.654545	0.127273
RPS24_ENST00000440692	289	55					RPS24_ENST00000440692	0.109091	0.872727	0.0181818
C3orf71	290	55					C3orf71	0.145455	0.854545	0
ATG16L1_ENST00000334050	293	55					ATG16L1_ENST00000334050	0.0909091	0.818182	0.0909091
ENSG00000227825	294	55					ENSG00000227825	0.381818	0.6	0.0181818
PBX1_ENST00000540246	301	55					PBX1_ENST00000540246	0.163636	0.836364	0
PURB	312	55					PURB	0.163636	0.836364	0
FAM82B	314	55					FAM82B	0.236364	0.636364	0.127273
HOXA4	320	55					HOXA4	0.145455	0.854545	0
NXN_ENST00000575801	327	55	NXN_ENST00000575801	0.454545	0.509091	0.0363636	NXN_ENST00000575801	0.454545	0.509091	0.0363636
CASP12	341	55					CASP12	0.163636	0.836364	0
CREB1_ENST00000432329	341	55					CREB1_ENST00000432329	0.2	0.672727	0.127273
CCNG2	344	55					CCNG2	0.363636	0.581818	0.0545455
PPID	370	55					PPID	0.127273	0.745455	0.127273
C4orf29_ENST00000398965	414	55					C4orf29_ENST00000398965	0.109091	0.8	0.0909091
ENSG00000196230	442	55					ENSG00000196230	0.4	0.6	0
SNX4	450	55	SNX4	0.163636	0.690909	0.145455	SNX4	0.163636	0.690909	0.145455
DUX4L7	485	55	DUX4L7	0	0.963636	0.0363636
SLC36A3_ENST00000377713	511	55					SLC36A3_ENST00000377713	0.4	0.581818	0.0181818
CCDC132_ENST00000544910	934	55					CCDC132_ENST00000544910	0.0909091	0.836364	0.0727273
HIST1H4G	98	54					HIST1H4G	0.388889	0.611111	0
TNFSF15_ENST00000374044	174	54					TNFSF15_ENST00000374044	0.388889	0.574074	0.037037
AGBL4_ENST00000371836	217	54					AGBL4_ENST00000371836	0.240741	0.62963	0.12963
PAFAH1B2_ENST00000527958	229	54	PAFAH1B2_ENST00000527958	0.166667	0.666667	0.166667	PAFAH1B2_ENST00000527958	0.166667	0.666667	0.166667
SYNGR1	233	54	SYNGR1	0.481481	0.481481	0.037037	SYNGR1	0.481481	0.481481	0.037037
C1orf174	243	54					C1orf174	0.388889	0.537037	0.0740741
DHRS4L2_ENST00000382755	257	54					DHRS4L2_ENST00000382755	0.425926	0.574074	0
ACRV1	265	54					ACRV1	0.12963	0.833333	0.037037
ANP32E	268	54	ANP32E	0.0555556	0.777778	0.166667	ANP32E	0.0555556	0.777778	0.166667
PSMF1	271	54					PSMF1	0.388889	0.611111	0
PSMB8	272	54					PSMB8	0.148148	0.833333	0.0185185
TIPRL	272	54					TIPRL	0.351852	0.537037	0.111111
ZNF691	284	54					ZNF691	0.148148	0.851852	0
KCNIP2	285	54					KCNIP2	0.166667	0.833333	0
SPDYA	286	54					SPDYA	0.12963	0.851852	0.0185185
RPF2	306	54					RPF2	0.148148	0.722222	0.12963
MCU_ENST00000357157	330	54					MCU_ENST00000357157	0.111111	0.833333	0.0555556
LDHAL6A	332	54					LDHAL6A	0.12963	0.851852	0.0185185
PRSS48	337	54					PRSS48	0.148148	0.851852	0
TMEM39B_ENST00000427288	342	54					TMEM39B_ENST00000427288	0.425926	0.555556	0.0185185
E2F5	346	54	E2F5	0.240741	0.611111	0.148148	E2F5	0.240741	0.611111	0.148148
PSMD8_ENST00000215071	350	54					PSMD8_ENST00000215071	0.425926	0.518519	0.0555556
RAD9B_ENST00000392672	429	54					RAD9B_ENST00000392672	0.0555556	0.851852	0.0925926
C4orf29	430	54					C4orf29	0.0925926	0.814815	0.0925926
REEP6_ENST00000395484	480	54					REEP6_ENST00000395484	0.407407	0.574074	0.0185185
C9orf102_ENST00000407474	531	54					C9orf102_ENST00000407474	0.148148	0.833333	0.0185185
RP11-578F21.5	632	54	RP11-578F21.5	0.462963	0.518519	0.0185185	RP11-578F21.5	0.462963	0.518519	0.0185185
RP11-578F21.5_ENST00000563027	632	54	RP11-578F21.5_ENST00000563027	0.462963	0.518519	0.0185185	RP11-578F21.5_ENST00000563027	0.462963	0.518519	0.0185185
S100A7A	101	53	S100A7A	0.490566	0.509434	0	S100A7A	0.490566	0.509434	0
EDDM3B	147	53					EDDM3B	0.150943	0.735849	0.113208
TRPM8_ENST00000355722	192	53					TRPM8_ENST00000355722	0.396226	0.603774	0
CHMP4B	224	53					CHMP4B	0.396226	0.566038	0.0377358
UBTD1	227	53					UBTD1	0.396226	0.603774	0
MAPK9_ENST00000425491	242	53					MAPK9_ENST00000425491	0.132075	0.867925	0
ARL10	244	53					ARL10	0.245283	0.641509	0.113208
FAM64A_ENST00000250056	248	53					FAM64A_ENST00000250056	0.188679	0.679245	0.132075
SKA1	255	53					SKA1	0.396226	0.528302	0.0754717
MARC2	257	53					MARC2	0.415094	0.566038	0.0188679
CYP2A7P1	268	53					CYP2A7P1	0.396226	0.528302	0.0754717
SMUG1	270	53					SMUG1	0.0754717	0.830189	0.0943396
MTIF3	278	53	MTIF3	0.264151	0.584906	0.150943	MTIF3	0.264151	0.584906	0.150943
SEC22A	307	53					SEC22A	0.188679	0.679245	0.132075
AIMP1	312	53					AIMP1	0.150943	0.735849	0.113208
TRADD	312	53					TRADD	0.358491	0.528302	0.113208
EIF2S1	315	53					EIF2S1	0.113208	0.886792	0
EI24_ENST00000278903	339	53	EI24_ENST00000278903	0.169811	0.679245	0.150943	EI24_ENST00000278903	0.169811	0.679245	0.150943
CCDC104_ENST00000339012	367	53					CCDC104_ENST00000339012	0.132075	0.754717	0.113208
CABP1	370	53					CABP1	0.188679	0.679245	0.132075
DLK2	383	53					DLK2	0.150943	0.849057	0
MXD3_ENST00000423571	388	53					MXD3_ENST00000423571	0.0943396	0.849057	0.0566038
TSPYL4	414	53	TSPYL4	0.113208	0.660377	0.226415	TSPYL4	0.113208	0.660377	0.226415
LIPM	423	53					LIPM	0.0943396	0.867925	0.0377358
RP13-395E19.1	607	53					RP13-395E19.1	0.150943	0.849057	0
MSL1_ENST00000398532	614	53					MSL1_ENST00000398532	0.320755	0.566038	0.113208
DEFB115	88	52					DEFB115	0.173077	0.711538	0.115385
HIST2H3D	136	52					HIST2H3D	0.326923	0.576923	0.0961538
CSTL1	145	52					CSTL1	0.326923	0.576923	0.0961538
UBE2QL1	161	52	UBE2QL1	0.5	0.461538	0.0384615	UBE2QL1	0.5	0.461538	0.0384615
[truncated: 1,943 more rows]

## Sheet: statistics
Datasets	Transcripts	Transcripts in PG_SOf_2SD	Transcripts in CG_SOf_2SD	OGs in CG_SOf_2SD	TSGs in CG_SOf_2SD	Novel oncogenes in CG_SOf_2SD	Novel tumor suppressor genes in CG_SOf_2SD	Tumor essential genes in CG_SOf_2SD
N0	29333	27060	2273	28 (out of 62)	99 (out of 119)	1	12	7
N50	21303	19457	1846	62 (out of 62)	116 (out of 119)	8	18	19
N100	13803	12743	1060	62 (out of 62)	118 (out of 119)	8	19	16
N500	997	911	86	25 (out of 62)	48 (out of 119)	0	0	0
