# Supplementary material for: Use of signals of positive and negative selection to distinguish cancer genes and passenger genes
Source: eLife. 2021 Jan 11;10:e59629. doi: 10.7554/eLife.59629 (PMC7877913; doi:10.7554/eLife.59629)
Supplement: Supplementary file 13. — Sheet ‘SO’ lists the genes/transcripts in datasets N0, N50, N100, and N500 that contain transcripts of human protein coding genes with at least 0, 50, 100, or 500 somatic substitutions in tumors, respectively. The lists of negatively selected genes identified by others were taken from the publications of Weghorn and Sunyaev, 2017, Zapata et al., 2018, Zhou et al., 2017 and Pyatnitskiy et al., 2015. Sheet ‘statistics’ indicates the number of negatively selected genes identified by others that are present in the N0, N50, N100, and N500 datasets. Note that only 48%, 64%, 77%, and 89% of the negatively selected genes identified by Weghorn and Sunyaev, 2017, Zapata et al., 2018, Zhou et al., 2017 and Pyatnitskiy et al., 2015, respectively, are present in the dataset N100 that we have analyzed in the present work. [file elife-59629-supp13.xlsx]

## Sheet: SO
Gene name; N0 (29333 genes)	Gene name; N50 (21303 genes)	Gene name; N100 (13803 genes)	Gene name; N500 (997 genes)	Weghorn list (147 genes)	Zhou list (112 genes)	Kegel list_all (16540 genes)	Kegel list_broadly (1014 genes)	Zapata list (25 genes)	Pyatnitskiy list (91 genes)
ABRA	ABRA	ABRA		ABRA		ABRA
ACSM1	ACSM1	ACSM1		ACSM1		ACSM1
ACSM2A	ACSM2A	ACSM2A		ACSM2A
AKAP12	AKAP12	AKAP12		AKAP12		AKAP12
AKR1A1	AKR1A1			AKR1A1		AKR1A1
ALDH1A1	ALDH1A1	ALDH1A1		ALDH1A1		ALDH1A1
ALKBH2	ALKBH2			ALKBH2		ALKBH2
AP2S1				AP2S1		AP2S1		AP2S1
AP3D1	AP3D1	AP3D1		AP3D1		AP3D1
ARHGAP11B				ARHGAP11B
ARHGEF10	ARHGEF10	ARHGEF10		ARHGEF10		ARHGEF10
ARIH2	ARIH2	ARIH2		ARIH2		ARIH2
ASIP				ASIP		ASIP
ATAT1	ATAT1			ATAT1		ATAT1
BCL2	BCL2	BCL2		BCL2		BCL2
BEX4				BEX4
BRD9	BRD9	BRD9		BRD9		BRD9
C17orf77	C17orf77			C17orf77
C18orf54	C18orf54			C18orf54		C18orf54
C1orf173	C1orf173	C1orf173	C1orf173	C1orf173
C9orf123				C9orf123
CCDC84	CCDC84			CCDC84		CCDC84	CCDC84
CCNG2	CCNG2			CCNG2		CCNG2
CCT8	CCT8	CCT8		CCT8		CCT8	CCT8
CDC42SE2				CDC42SE2		CDC42SE2
CDR1	CDR1	CDR1		CDR1
CKAP5	CKAP5	CKAP5		CKAP5		CKAP5	CKAP5
CLIP1	CLIP1	CLIP1		CLIP1		CLIP1
COPB2	COPB2	COPB2		COPB2		COPB2	COPB2
CTBP2	CTBP2	CTBP2		CTBP2		CTBP2
CYBB	CYBB	CYBB		CYBB
CYP2C9	CYP2C9	CYP2C9		CYP2C9		CYP2C9
DIAPH1	DIAPH1	DIAPH1		DIAPH1		DIAPH1
DLEC1	DLEC1	DLEC1		DLEC1		DLEC1
DNAH17	DNAH17	DNAH17	DNAH17	DNAH17	DNAH17
DNAJC2	DNAJC2	DNAJC2		DNAJC2		DNAJC2
EAF2	EAF2			EAF2		EAF2
EDC3	EDC3			EDC3		EDC3
EIF3H	EIF3H			EIF3H		EIF3H	EIF3H
ELN	ELN	ELN		ELN		ELN
ERVW-1	ERVW-1			ERVW-1		ERVW-1
ESPL1	ESPL1	ESPL1		ESPL1		ESPL1	ESPL1
ESYT1	ESYT1	ESYT1		ESYT1		ESYT1
F13A1	F13A1	F13A1		F13A1		F13A1
FAM131B	FAM131B	FAM131B		FAM131B		FAM131B
FAM181A	FAM181A	FAM181A		FAM181A		FAM181A
FCRL3	FCRL3	FCRL3		FCRL3		FCRL3
GALNT6	GALNT6	GALNT6		GALNT6
GAS2L1	GAS2L1			GAS2L1		GAS2L1
GJB5	GJB5			GJB5		GJB5			GJB5
GPR89A				GPR89A
GPRIN2	GPRIN2	GPRIN2		GPRIN2		GPRIN2
GTSF1L				GTSF1L		GTSF1L		GTSF1L
HEATR2	HEATR2	HEATR2		HEATR2
HIST1H4C	HIST1H4C			HIST1H4C		HIST1H4C
HLA-DPB1	HLA-DPB1			HLA-DPB1		HLA-DPB1
HP	HP			HP		HP
HTR2B	HTR2B			HTR2B		HTR2B
IL10	IL10			IL10		IL10
ILF3	ILF3	ILF3		ILF3		ILF3	ILF3
ISM2	ISM2	ISM2		ISM2		ISM2
KCNJ13	KCNJ13			KCNJ13		KCNJ13
KRR1	KRR1			KRR1		KRR1	KRR1
KRT75	KRT75	KRT75		KRT75		KRT75
LBX2				LBX2		LBX2
LSM6				LSM6		LSM6	LSM6
LYRM1				LYRM1		LYRM1
MAOB	MAOB	MAOB		MAOB
MBTD1	MBTD1			MBTD1		MBTD1
MDM4	MDM4	MDM4		MDM4		MDM4
METTL21D				METTL21D
MYO5B	MYO5B	MYO5B	MYO5B	MYO5B		MYO5B
NBPF3	NBPF3	NBPF3		NBPF3
NCL	NCL	NCL		NCL		NCL
NIPBL	NIPBL	NIPBL	NIPBL	NIPBL		NIPBL
NSA2				NSA2		NSA2	NSA2
OBP2B	OBP2B			OBP2B
OGN	OGN			OGN		OGN
PAIP2				PAIP2		PAIP2
PAX6	PAX6	PAX6		PAX6		PAX6
PCLO	PCLO	PCLO	PCLO	PCLO		PCLO
PCMTD2	PCMTD2			PCMTD2		PCMTD2
PCP4L1				PCP4L1		PCP4L1
PDE4DIP	PDE4DIP	PDE4DIP	PDE4DIP	PDE4DIP		PDE4DIP
PFKFB2	PFKFB2	PFKFB2		PFKFB2		PFKFB2
PHF1	PHF1			PHF1		PHF1
PIGT	PIGT	PIGT		PIGT		PIGT
POLR3C	POLR3C			POLR3C		POLR3C	POLR3C
POTEI	POTEI			POTEI
PPL	PPL	PPL		PPL
PRR4				PRR4		PRR4
PSMA8	PSMA8			PSMA8		PSMA8
PSMD2	PSMD2	PSMD2		PSMD2		PSMD2	PSMD2
PZP	PZP	PZP		PZP		PZP
RAB23				RAB23		RAB23
RASSF6	RASSF6	RASSF6		RASSF6		RASSF6
RBFOX3	RBFOX3			RBFOX3		RBFOX3
REEP3				REEP3		REEP3
REV1	REV1	REV1		REV1
RNF170				RNF170		RNF170
RPL39				RPL39
RPL4	RPL4			RPL4		RPL4	RPL4
SIPA1L1	SIPA1L1	SIPA1L1		SIPA1L1		SIPA1L1
SLC22A2	SLC22A2	SLC22A2		SLC22A2		SLC22A2
SLC25A17	SLC25A17			SLC25A17		SLC25A17
SLC25A40	SLC25A40			SLC25A40		SLC25A40
SLC38A2	SLC38A2	SLC38A2		SLC38A2		SLC38A2
SLC39A6	SLC39A6	SLC39A6		SLC39A6		SLC39A6
SMNDC1				SMNDC1		SMNDC1	SMNDC1
SNRNP35				SNRNP35		SNRNP35	SNRNP35
SNX5	SNX5			SNX5		SNX5
SON	SON	SON		SON		SON	SON
SORBS2	SORBS2	SORBS2		SORBS2		SORBS2
STARD5				STARD5		STARD5
STX17				STX17		STX17
STXBP3	STXBP3	STXBP3		STXBP3		STXBP3
TAF13				TAF13		TAF13
TCF19				TCF19		TCF19
TECTA	TECTA	TECTA	TECTA	TECTA	TECTA	TECTA		TECTA
TERT	TERT	TERT		TERT	TERT	TERT		TERT
THYN1	THYN1			THYN1		THYN1
TIE1	TIE1	TIE1		TIE1		TIE1
TMEM106B	TMEM106B			TMEM106B		TMEM106B
TMEM139				TMEM139		TMEM139
TNXB	TNXB			TNXB		TNXB
TRPC4	TRPC4	TRPC4		TRPC4		TRPC4
TTC26	TTC26	TTC26		TTC26		TTC26
TUBB	TUBB			TUBB		TUBB	TUBB
UQCRBP1				UQCRBP1
USP11	USP11	USP11		USP11
UTP15	UTP15			UTP15		UTP15	UTP15
VPS13B	VPS13B	VPS13B	VPS13B	VPS13B		VPS13B
WRAP53	WRAP53			WRAP53		WRAP53
YIPF2	YIPF2			YIPF2		YIPF2
ZNF182	ZNF182	ZNF182		ZNF182
ZNF208	ZNF208	ZNF208	ZNF208	ZNF208
ZNF395	ZNF395	ZNF395		ZNF395		ZNF395
ZNF43	ZNF43	ZNF43		ZNF43
ZNF80	ZNF80	ZNF80		ZNF80		ZNF80
ZSWIM7				ZSWIM7		ZSWIM7
ABCA3	ABCA3	ABCA3	ABCA3			ABCA3			ABCA3
ADAMTS15	ADAMTS15	ADAMTS15				ADAMTS15			ADAMTS15
ADAR	ADAR	ADAR				ADAR			ADAR
AKR1B1	AKR1B1								AKR1B1
BCL2L12	BCL2L12	BCL2L12				BCL2L12		BCL2L12	BCL2L12
BMP1	BMP1	BMP1				BMP1			BMP1
CADPS2	CADPS2	CADPS2				CADPS2			CADPS2
CAPN11	CAPN11	CAPN11				CAPN11			CAPN11
CAPN12	CAPN12	CAPN12				CAPN12			CAPN12
CASP10	CASP10					CASP10			CASP10
CATSPER1	CATSPER1	CATSPER1				CATSPER1			CATSPER1
CCR5	CCR5	CCR5							CCR5
CDH11	CDH11	CDH11				CDH11			CDH11
CRISPLD2	CRISPLD2	CRISPLD2				CRISPLD2			CRISPLD2
CXCR1	CXCR1	CXCR1				CXCR1			CXCR1
CYP2J2	CYP2J2					CYP2J2			CYP2J2
DAPK2	DAPK2					DAPK2			DAPK2
EDAR	EDAR	EDAR				EDAR			EDAR
ENGASE	ENGASE	ENGASE				ENGASE			ENGASE
EPB41L1	EPB41L1	EPB41L1				EPB41L1			EPB41L1
EPB41L4B	EPB41L4B	EPB41L4B				EPB41L4B			EPB41L4B
ERCC6	ERCC6	ERCC6				ERCC6			ERCC6
FGF5	FGF5	FGF5				FGF5			FGF5
GCNT3	GCNT3	GCNT3				GCNT3			GCNT3
GJB4	GJB4	GJB4				GJB4			GJB4
GPR115	GPR115	GPR115							GPR115
HBB	HBB								HBB
INPP5B	INPP5B					INPP5B			INPP5B
IPO13	IPO13	IPO13				IPO13	IPO13		IPO13
ITGB5	ITGB5	ITGB5				ITGB5			ITGB5
LRFN1	LRFN1	LRFN1				LRFN1			LRFN1
LRG1	LRG1	LRG1				LRG1			LRG1
LRRC15	LRRC15	LRRC15				LRRC15			LRRC15
MC2R	MC2R	MC2R				MC2R			MC2R
MIB2	MIB2	MIB2				MIB2			MIB2
MLKL	MLKL	MLKL				MLKL			MLKL
MRGPRX3	MRGPRX3	MRGPRX3				MRGPRX3			MRGPRX3
MRGPRX4	MRGPRX4	MRGPRX4							MRGPRX4
MYCT1	MYCT1	MYCT1				MYCT1			MYCT1
MYH9	MYH9	MYH9	MYH9			MYH9			MYH9
MYO18A	MYO18A	MYO18A				MYO18A			MYO18A
NFATC2	NFATC2	NFATC2				NFATC2			NFATC2
NMNAT3	NMNAT3					NMNAT3			NMNAT3
NNT	NNT	NNT				NNT			NNT
NRP2	NRP2	NRP2				NRP2			NRP2
NVL	NVL	NVL				NVL	NVL		NVL
OR2C3	OR2C3	OR2C3			OR2C3	OR2C3			OR2C3
PCDHB13	PCDHB13	PCDHB13							PCDHB13
PCDHGA12	PCDHGA12	PCDHGA12							PCDHGA12
PCDHGC5	PCDHGC5	PCDHGC5							PCDHGC5
PDIA4	PDIA4	PDIA4				PDIA4			PDIA4
PDPR	PDPR	PDPR				PDPR			PDPR
PLD2	PLD2	PLD2				PLD2			PLD2
PLXNA2	PLXNA2	PLXNA2	PLXNA2			PLXNA2			PLXNA2
PM20D1	PM20D1	PM20D1				PM20D1			PM20D1
PTK2B	PTK2B	PTK2B				PTK2B			PTK2B
PVRL4	PVRL4	PVRL4							PVRL4
RHPN2	RHPN2	RHPN2				RHPN2			RHPN2
RSPO1	RSPO1					RSPO1			RSPO1
SEMA4F	SEMA4F	SEMA4F				SEMA4F			SEMA4F
SEMA6C	SEMA6C	SEMA6C				SEMA6C			SEMA6C
SH3BP4	SH3BP4	SH3BP4				SH3BP4			SH3BP4
SLC12A8	SLC12A8	SLC12A8				SLC12A8			SLC12A8
SLC24A1	SLC24A1	SLC24A1				SLC24A1			SLC24A1
SLC26A7	SLC26A7	SLC26A7				SLC26A7			SLC26A7
SLC27A5	SLC27A5	SLC27A5				SLC27A5			SLC27A5
SLC45A1	SLC45A1	SLC45A1			SLC45A1	SLC45A1			SLC45A1
SLC5A6	SLC5A6	SLC5A6				SLC5A6			SLC5A6
SLC9A3	SLC9A3	SLC9A3			SLC9A3	SLC9A3			SLC9A3
SMYD1	SMYD1	SMYD1				SMYD1			SMYD1
STEAP3	STEAP3	STEAP3				STEAP3			STEAP3
STK11IP	STK11IP	STK11IP				STK11IP			STK11IP
STOX1	STOX1	STOX1				STOX1			STOX1
TBC1D9B	TBC1D9B	TBC1D9B				TBC1D9B			TBC1D9B
TGM5	TGM5	TGM5				TGM5			TGM5
THBS4	THBS4	THBS4				THBS4			THBS4
TMC7	TMC7	TMC7				TMC7			TMC7
TMEM104	TMEM104	TMEM104				TMEM104			TMEM104
TMEM63B	TMEM63B	TMEM63B				TMEM63B			TMEM63B
TMPRSS9	TMPRSS9	TMPRSS9				TMPRSS9			TMPRSS9
TNFRSF10A	TNFRSF10A	TNFRSF10A				TNFRSF10A			TNFRSF10A
TTC7A	TTC7A	TTC7A				TTC7A			TTC7A
UBIAD1	UBIAD1					UBIAD1			UBIAD1
UNC45A	UNC45A	UNC45A				UNC45A			UNC45A
UNC5B	UNC5B	UNC5B				UNC5B			UNC5B
VPS18	VPS18	VPS18				VPS18	VPS18		VPS18
XPO6	XPO6	XPO6				XPO6			XPO6
ZNF195	ZNF195	ZNF195							ZNF195
ZNF493	ZNF493	ZNF493				ZNF493			ZNF493
ZNFX1	ZNFX1	ZNFX1				ZNFX1			ZNFX1
JUN	JUN	JUN				JUN
NOV	NOV
39340
A1BG	A1BG	A1BG				A1BG
A1CF	A1CF	A1CF				A1CF
A1CF_ENST00000282641	A1CF_ENST00000282641	A1CF_ENST00000282641
A1CF_ENST00000373995	A1CF_ENST00000373995	A1CF_ENST00000373995
A2LD1
A2M	A2M	A2M				A2M
A2ML1	A2ML1	A2ML1				A2ML1
A3GALT2P
A4D226_HUMAN
A4GALT	A4GALT	A4GALT				A4GALT
A4GNT	A4GNT					A4GNT
AAAS	AAAS	AAAS				AAAS
AACS	AACS	AACS				AACS
AADAC	AADAC	AADAC				AADAC
AADACL2	AADACL2	AADACL2				AADACL2
AADACL2_ENST00000356517	AADACL2_ENST00000356517	AADACL2_ENST00000356517
AADACL3	AADACL3					AADACL3
AADACL3_ENST00000359318	AADACL3_ENST00000359318	AADACL3_ENST00000359318
AADACL4	AADACL4	AADACL4				AADACL4
AADAT	AADAT					AADAT
AAGAB	AAGAB					AAGAB
AAK1	AAK1	AAK1				AAK1
AAK1_ENST00000409085	AAK1_ENST00000409085	AAK1_ENST00000409085
AAMP	AAMP					AAMP
AANAT	AANAT					AANAT
AANAT_ENST00000250615	AANAT_ENST00000250615
AARS	AARS	AARS				AARS	AARS
AARS2	AARS2	AARS2				AARS2
AARSD1	AARSD1	AARSD1
AASDH	AASDH	AASDH				AASDH
AASDH_ENST00000502617	AASDH_ENST00000502617	AASDH_ENST00000502617
AASDHPPT	AASDHPPT					AASDHPPT
AASS	AASS	AASS				AASS
AATK	AATK	AATK				AATK
AATK_ENST00000326724	AATK_ENST00000326724	AATK_ENST00000326724
AB019437_1
ABAT	ABAT	ABAT				ABAT
ABCA1	ABCA1	ABCA1				ABCA1
ABCA1_ENST00000423487	ABCA1_ENST00000423487
ABCA10	ABCA10	ABCA10				ABCA10
ABCA12	ABCA12	ABCA12	ABCA12			ABCA12
ABCA12_ENST00000389661	ABCA12_ENST00000389661	ABCA12_ENST00000389661	ABCA12_ENST00000389661
ABCA13	ABCA13	ABCA13	ABCA13			ABCA13
ABCA13_ENST00000435803	ABCA13_ENST00000435803	ABCA13_ENST00000435803	ABCA13_ENST00000435803
ABCA2	ABCA2	ABCA2	ABCA2		ABCA2	ABCA2
ABCA4	ABCA4	ABCA4	ABCA4			ABCA4
ABCA4_ENST00000535735	ABCA4_ENST00000535735	ABCA4_ENST00000535735
ABCA4_ENST00000536513	ABCA4_ENST00000536513
ABCA5	ABCA5	ABCA5				ABCA5
ABCA6	ABCA6	ABCA6				ABCA6
ABCA6_ENST00000590645
ABCA7	ABCA7	ABCA7	ABCA7			ABCA7
ABCA8	ABCA8	ABCA8	ABCA8			ABCA8
ABCA8_ENST00000430352	ABCA8_ENST00000430352	ABCA8_ENST00000430352	ABCA8_ENST00000430352
ABCA9	ABCA9	ABCA9
ABCB1	ABCB1	ABCB1	ABCB1			ABCB1
ABCB10	ABCB10	ABCB10				ABCB10
ABCB11	ABCB11	ABCB11				ABCB11
ABCB11_ENST00000263817	ABCB11_ENST00000263817	ABCB11_ENST00000263817
ABCB4	ABCB4	ABCB4				ABCB4
ABCB4_ENST00000265723	ABCB4_ENST00000265723	ABCB4_ENST00000265723
ABCB5	ABCB5	ABCB5				ABCB5
ABCB5_ENST00000404938	ABCB5_ENST00000404938	ABCB5_ENST00000404938
ABCB5_ENST00000443026	ABCB5_ENST00000443026
ABCB6	ABCB6	ABCB6				ABCB6
ABCB6_ENST00000265316	ABCB6_ENST00000265316	ABCB6_ENST00000265316
ABCB7	ABCB7	ABCB7
ABCB8	ABCB8	ABCB8				ABCB8
ABCB8_ENST00000356058	ABCB8_ENST00000356058	ABCB8_ENST00000356058
ABCB8_ENST00000542328	ABCB8_ENST00000542328	ABCB8_ENST00000542328
ABCB9	ABCB9	ABCB9				ABCB9
ABCC1	ABCC1	ABCC1				ABCC1
ABCC1_ENST00000399408	ABCC1_ENST00000399408	ABCC1_ENST00000399408
ABCC10	ABCC10	ABCC10				ABCC10
ABCC10_ENST00000372530	ABCC10_ENST00000372530	ABCC10_ENST00000372530
ABCC11	ABCC11	ABCC11				ABCC11
ABCC12	ABCC12	ABCC12				ABCC12
ABCC2	ABCC2	ABCC2				ABCC2
ABCC3	ABCC3	ABCC3				ABCC3
ABCC3_ENST00000427699	ABCC3_ENST00000427699	ABCC3_ENST00000427699
ABCC4	ABCC4	ABCC4				ABCC4
ABCC4_ENST00000376887	ABCC4_ENST00000376887	ABCC4_ENST00000376887
ABCC4_ENST00000431522
ABCC5	ABCC5	ABCC5				ABCC5
ABCC5_ENST00000382494
ABCC6	ABCC6	ABCC6				ABCC6
ABCC8	ABCC8	ABCC8	ABCC8			ABCC8
ABCC9	ABCC9	ABCC9	ABCC9			ABCC9
ABCC9_ENST00000261201	ABCC9_ENST00000261201	ABCC9_ENST00000261201	ABCC9_ENST00000261201
ABCD1	ABCD1	ABCD1
ABCD1_ENST00000370129
ABCD1_ENST00000443684
ABCD2	ABCD2	ABCD2				ABCD2
ABCD3	ABCD3	ABCD3				ABCD3
ABCD3_ENST00000315713
ABCD4	ABCD4	ABCD4				ABCD4
ABCD4_ENST00000298816
ABCD4_ENST00000537629
ABCE1	ABCE1	ABCE1				ABCE1	ABCE1
ABCF1	ABCF1	ABCF1				ABCF1	ABCF1
ABCF2	ABCF2	ABCF2				ABCF2
ABCF2_ENST00000222388	ABCF2_ENST00000222388	ABCF2_ENST00000222388
ABCF3	ABCF3	ABCF3				ABCF3
ABCG1	ABCG1	ABCG1				ABCG1
ABCG1_ENST00000343687	ABCG1_ENST00000343687
ABCG1_ENST00000398437	ABCG1_ENST00000398437	ABCG1_ENST00000398437
ABCG1_ENST00000398457	ABCG1_ENST00000398457	ABCG1_ENST00000398457
ABCG2	ABCG2	ABCG2				ABCG2
ABCG2_ENST00000237612	ABCG2_ENST00000237612	ABCG2_ENST00000237612
ABCG4	ABCG4	ABCG4				ABCG4
ABCG5	ABCG5	ABCG5				ABCG5
ABCG8	ABCG8	ABCG8				ABCG8
ABHD1	ABHD1					ABHD1
ABHD10	ABHD10					ABHD10
ABHD11	ABHD11					ABHD11
ABHD12	ABHD12					ABHD12
ABHD12_ENST00000339157	ABHD12_ENST00000339157
ABHD12_ENST00000450393
ABHD12B	ABHD12B					ABHD12B
ABHD12B_ENST00000337334	ABHD12B_ENST00000337334
ABHD13	ABHD13					ABHD13
ABHD14A						ABHD14A
ABHD14B						ABHD14B
ABHD14B_ENST00000315877
ABHD15	ABHD15					ABHD15
ABHD16A	ABHD16A	ABHD16A				ABHD16A
ABHD16A_ENST00000538874
ABHD16B	ABHD16B					ABHD16B
ABHD2	ABHD2	ABHD2				ABHD2
ABHD3	ABHD3					ABHD3
ABHD4	ABHD4					ABHD4
ABHD5	ABHD5					ABHD5
ABHD6	ABHD6					ABHD6
ABHD8	ABHD8	ABHD8				ABHD8
ABI1	ABI1					ABI1
ABI1_ENST00000346832
ABI2	ABI2					ABI2
ABI2_ENST00000261016
ABI2_ENST00000295851	ABI2_ENST00000295851
ABI3	ABI3	ABI3				ABI3
ABI3BP	ABI3BP	ABI3BP				ABI3BP
ABI3BP_ENST00000383691	ABI3BP_ENST00000383691	ABI3BP_ENST00000383691
ABI3BP_ENST00000471714	ABI3BP_ENST00000471714	ABI3BP_ENST00000471714
ABL1	ABL1	ABL1				ABL1
ABL1_ENST00000318560	ABL1_ENST00000318560	ABL1_ENST00000318560
ABL1_ENST00000372348	ABL1_ENST00000372348	ABL1_ENST00000372348
ABL2	ABL2	ABL2				ABL2
ABL2_ENST00000392043	ABL2_ENST00000392043	ABL2_ENST00000392043
ABL2_ENST00000502732	ABL2_ENST00000502732	ABL2_ENST00000502732
ABL2_ENST00000512653	ABL2_ENST00000512653	ABL2_ENST00000512653
ABLIM1	ABLIM1	ABLIM1				ABLIM1
ABLIM1_ENST00000277895	ABLIM1_ENST00000277895	ABLIM1_ENST00000277895
ABLIM1_ENST00000336585	ABLIM1_ENST00000336585	ABLIM1_ENST00000336585
ABLIM1_ENST00000392952	ABLIM1_ENST00000392952	ABLIM1_ENST00000392952
ABLIM1_ENST00000392955
ABLIM1_ENST00000440467
ABLIM2	ABLIM2	ABLIM2				ABLIM2
ABLIM2_ENST00000296372	ABLIM2_ENST00000296372	ABLIM2_ENST00000296372
ABLIM2_ENST00000361737	ABLIM2_ENST00000361737	ABLIM2_ENST00000361737
ABLIM2_ENST00000546334
ABLIM3	ABLIM3	ABLIM3				ABLIM3
ABLIM3_ENST00000504238	ABLIM3_ENST00000504238	ABLIM3_ENST00000504238
ABO	ABO
ABP1	ABP1	ABP1
ABP1_ENST00000416793	ABP1_ENST00000416793	ABP1_ENST00000416793
ABR	ABR	ABR				ABR
ABR_ENST00000291107	ABR_ENST00000291107	ABR_ENST00000291107
ABRACL						ABRACL
ABT1	ABT1					ABT1
ABTB1	ABTB1	ABTB1				ABTB1
ABTB2	ABTB2	ABTB2				ABTB2
ABTB2_ENST00000435224	ABTB2_ENST00000435224	ABTB2_ENST00000435224
AC002472.13
AC003101.1
AC003101.1_ENST00000412403
AC004148.1
AC005329.1
AC005392.1
AC005392.1_ENST00000378007
AC005609.1	AC005609.1
AC005609.1_ENST00000502505	AC005609.1_ENST00000502505
AC005754.1	AC005754.1	AC005754.1
AC005754.1_ENST00000539533	AC005754.1_ENST00000539533	AC005754.1_ENST00000539533
AC005838.1
AC005838.1_ENST00000312127
AC007731_16
AC008537_5-2
AC008969.1
AC009365.3
AC009365.3_ENST00000332558
AC010872_2	AC010872_2	AC010872_2
AC010997.1
AC011537.1
AC011537.1_ENST00000412610
AC011551.2
AC011551.2_ENST00000414155
AC012100.1	AC012100.1
AC013469_8-2	AC013469_8-2	AC013469_8-2
AC015804.1
AC015804.1_ENST00000374983
AC022098.2
AC022498.1
AC022601.1	AC022601.1	AC022601.1
AC022601.1_ENST00000554864	AC022601.1_ENST00000554864	AC022601.1_ENST00000554864
AC023469_1
AC026458.2	AC026458.2
AC027369_8	AC027369_8
AC068473.1
AC073082.1
AC073082.1_ENST00000378305
AC073343.1
AC073343.1_ENST00000399484
AC073343.1_ENST00000542006
AC073343.1_ENST00000544825
AC079612.1
AC087645.2
AC087645.3
AC091132.2
AC092031.1
AC092070_2	AC092070_2
AC093393.1	AC093393.1
AC093726.6
AC097374_3
AC097381.1
AC099524.1	AC099524.1	AC099524.1
AC103710_2
AC112491_4
AC114273.2
AC114772.1
AC114772.1_ENST00000339092
AC120042.2
AC125494.1
AC125494.1_ENST00000407384
AC127391_4
AC129492.6
AC129492.6_ENST00000399413
AC133485.1
AC133485.1_ENST00000354614
AC136604.1
AC136604.1_ENST00000418535
AC136604.1_ENST00000425471
AC142381.1
AC142381_2
AC142381_2_ENST00000356559
ACAA1	ACAA1					ACAA1
ACAA1_ENST00000544624
ACAA2	ACAA2					ACAA2
ACACB	ACACB	ACACB	ACACB			ACACB
ACACB_ENST00000543201	ACACB_ENST00000543201	ACACB_ENST00000543201
ACAD10	ACAD10	ACAD10				ACAD10
ACAD10_ENST00000413681	ACAD10_ENST00000413681	ACAD10_ENST00000413681
ACAD10_ENST00000455480	ACAD10_ENST00000455480	ACAD10_ENST00000455480
ACAD11	ACAD11	ACAD11				ACAD11
ACAD8	ACAD8					ACAD8
ACAD8_ENST00000537423
ACAD8_ENST00000543332	ACAD8_ENST00000543332
ACAD9	ACAD9	ACAD9				ACAD9
ACADL	ACADL					ACADL
ACADM	ACADM					ACADM
ACADM_ENST00000420607	ACADM_ENST00000420607
ACADS	ACADS	ACADS				ACADS
ACADSB	ACADSB					ACADSB
ACADVL	ACADVL					ACADVL
ACAN	ACAN	ACAN	ACAN			ACAN
ACAP1	ACAP1	ACAP1				ACAP1
ACAP2	ACAP2	ACAP2				ACAP2
ACAP3	ACAP3	ACAP3				ACAP3
ACAP3_ENST00000354700	ACAP3_ENST00000354700	ACAP3_ENST00000354700
ACAT1	ACAT1					ACAT1
ACAT2	ACAT2					ACAT2
ACAT2_ENST00000541436
ACBD3	ACBD3	ACBD3				ACBD3
ACBD4	ACBD4					ACBD4
ACBD4_ENST00000431281	ACBD4_ENST00000431281
ACBD5	ACBD5	ACBD5				ACBD5
ACBD5_ENST00000375888	ACBD5_ENST00000375888	ACBD5_ENST00000375888
ACBD5_ENST00000396271	ACBD5_ENST00000396271	ACBD5_ENST00000396271
ACBD5_ENST00000426079
ACBD6						ACBD6
ACBD7						ACBD7
ACCN1	ACCN1	ACCN1
ACCN1_ENST00000359872	ACCN1_ENST00000359872	ACCN1_ENST00000359872
ACCN2	ACCN2	ACCN2
ACCN3	ACCN3	ACCN3
ACCN3_ENST00000357922	ACCN3_ENST00000357922	ACCN3_ENST00000357922
ACCN4	ACCN4	ACCN4
ACCN5	ACCN5	ACCN5
ACCS	ACCS	ACCS				ACCS
ACCSL	ACCSL	ACCSL				ACCSL
ACD	ACD	ACD				ACD
ACE	ACE	ACE				ACE
ACE_ENST00000290863	ACE_ENST00000290863	ACE_ENST00000290863
ACE_ENST00000428043	ACE_ENST00000428043	ACE_ENST00000428043
ACE_ENST00000490216	ACE_ENST00000490216	ACE_ENST00000490216
ACE2	ACE2	ACE2
ACER1	ACER1					ACER1
ACER2	ACER2					ACER2
ACER2_ENST00000380376
ACER3						ACER3
ACER3_ENST00000544113
ACHE	ACHE	ACHE				ACHE
ACHE_ENST00000412389	ACHE_ENST00000412389	ACHE_ENST00000412389
ACIN1	ACIN1	ACIN1				ACIN1
ACIN1_ENST00000338631	ACIN1_ENST00000338631	ACIN1_ENST00000338631
ACIN1_ENST00000397341
ACKR3	ACKR3	ACKR3			ACKR3	ACKR3
ACLY	ACLY	ACLY				ACLY
ACMSD	ACMSD	ACMSD				ACMSD
ACN9
ACO1	ACO1	ACO1				ACO1
ACO1_ENST00000379921	ACO1_ENST00000379921
ACO1_ENST00000379923	ACO1_ENST00000379923	ACO1_ENST00000379923
ACO2	ACO2	ACO2				ACO2
ACOT1
ACOT11	ACOT11	ACOT11				ACOT11
ACOT11_ENST00000371316	ACOT11_ENST00000371316	ACOT11_ENST00000371316
ACOT12	ACOT12	ACOT12				ACOT12
ACOT13						ACOT13
ACOT13_ENST00000537591
ACOT2	ACOT2
ACOT4	ACOT4					ACOT4
ACOT6						ACOT6
ACOT7	ACOT7					ACOT7
ACOT7_ENST00000377842	ACOT7_ENST00000377842
ACOT7_ENST00000377845	ACOT7_ENST00000377845
ACOT7_ENST00000377855	ACOT7_ENST00000377855
ACOT8	ACOT8					ACOT8
ACOT9	ACOT9
ACOT9_ENST00000379303	ACOT9_ENST00000379303
ACOX1	ACOX1	ACOX1				ACOX1
ACOX1_ENST00000301608	ACOX1_ENST00000301608	ACOX1_ENST00000301608
ACOX2	ACOX2	ACOX2				ACOX2
ACOX3	ACOX3	ACOX3				ACOX3
ACOXL	ACOXL	ACOXL				ACOXL
ACOXL_ENST00000340561	ACOXL_ENST00000340561
ACOXL_ENST00000439055	ACOXL_ENST00000439055	ACOXL_ENST00000439055
ACP1	ACP1					ACP1
ACP1_ENST00000272067
ACP2	ACP2					ACP2
ACP5	ACP5					ACP5
ACP5_ENST00000592828	ACP5_ENST00000592828
ACP6	ACP6					ACP6
ACP6_ENST00000392988	ACP6_ENST00000392988
ACPL2	ACPL2	ACPL2
ACPL2_ENST00000393007	ACPL2_ENST00000393007
ACPP	ACPP	ACPP				ACPP
ACPP_ENST00000351273	ACPP_ENST00000351273	ACPP_ENST00000351273
ACPT	ACPT	ACPT
ACR	ACR					ACR
ACRBP	ACRBP	ACRBP				ACRBP
ACRC	ACRC	ACRC
ACRV1	ACRV1					ACRV1
ACSBG1	ACSBG1	ACSBG1				ACSBG1
ACSBG2	ACSBG2	ACSBG2				ACSBG2
ACSF2	ACSF2	ACSF2				ACSF2
ACSF3	ACSF3	ACSF3				ACSF3
ACSL1	ACSL1	ACSL1				ACSL1
ACSL3	ACSL3	ACSL3				ACSL3
ACSL3_ENST00000357430	ACSL3_ENST00000357430	ACSL3_ENST00000357430
ACSL4	ACSL4	ACSL4
ACSL5	ACSL5	ACSL5				ACSL5
ACSL5_ENST00000369410
ACSL6	ACSL6	ACSL6				ACSL6
ACSL6_ENST00000379249	ACSL6_ENST00000379249	ACSL6_ENST00000379249
ACSL6_ENST00000379264	ACSL6_ENST00000379264	ACSL6_ENST00000379264
ACSL6_ENST00000379272	ACSL6_ENST00000379272	ACSL6_ENST00000379272
ACSM1_ENST00000219151	ACSM1_ENST00000219151
ACSM2B	ACSM2B	ACSM2B
ACSM2B_ENST00000414188	ACSM2B_ENST00000414188
ACSM3	ACSM3	ACSM3				ACSM3
ACSM3_ENST00000440284	ACSM3_ENST00000440284
ACSM4	ACSM4	ACSM4				ACSM4
ACSM4_ENST00000399422	ACSM4_ENST00000399422	ACSM4_ENST00000399422
ACSM5	ACSM5	ACSM5				ACSM5
ACSS1	ACSS1	ACSS1				ACSS1
ACSS1_ENST00000376726
ACSS1_ENST00000432802	ACSS1_ENST00000432802
ACSS1_ENST00000537502	ACSS1_ENST00000537502	ACSS1_ENST00000537502
ACSS1_ENST00000542618	ACSS1_ENST00000542618	ACSS1_ENST00000542618
ACSS2	ACSS2	ACSS2				ACSS2
ACSS2_ENST00000253382	ACSS2_ENST00000253382	ACSS2_ENST00000253382
ACSS2_ENST00000336325	ACSS2_ENST00000336325
ACSS3	ACSS3	ACSS3				ACSS3
ACTA1	ACTA1	ACTA1				ACTA1
ACTA2	ACTA2					ACTA2
ACTB	ACTB	ACTB				ACTB
ACTB_ENST00000417101	ACTB_ENST00000417101
ACTBL2	ACTBL2	ACTBL2				ACTBL2
ACTC1	ACTC1	ACTC1				ACTC1
ACTG1	ACTG1	ACTG1				ACTG1
ACTG2	ACTG2	ACTG2				ACTG2
ACTL6A	ACTL6A					ACTL6A	ACTL6A
ACTL6B	ACTL6B	ACTL6B				ACTL6B
ACTL7A	ACTL7A	ACTL7A				ACTL7A
ACTL7B	ACTL7B	ACTL7B				ACTL7B
ACTL8	ACTL8	ACTL8				ACTL8
ACTL9	ACTL9	ACTL9				ACTL9
ACTN1	ACTN1	ACTN1				ACTN1
ACTN1_ENST00000394419	ACTN1_ENST00000394419	ACTN1_ENST00000394419
ACTN2	ACTN2	ACTN2				ACTN2
ACTN2_ENST00000542672	ACTN2_ENST00000542672	ACTN2_ENST00000542672
ACTN3	ACTN3
ACTN4	ACTN4	ACTN4
ACTR10	ACTR10					ACTR10	ACTR10
ACTR1A	ACTR1A					ACTR1A
ACTR1B	ACTR1B	ACTR1B				ACTR1B
ACTR2	ACTR2					ACTR2	ACTR2
ACTR2_ENST00000377982	ACTR2_ENST00000377982
ACTR3	ACTR3					ACTR3
ACTR3B	ACTR3B					ACTR3B
ACTR5	ACTR5	ACTR5				ACTR5
ACTR6	ACTR6					ACTR6	ACTR6
ACTR8	ACTR8	ACTR8				ACTR8	ACTR8
ACTR8_ENST00000231909	ACTR8_ENST00000231909
ACTRT1	ACTRT1	ACTRT1
ACTRT2	ACTRT2	ACTRT2				ACTRT2
ACVR1	ACVR1	ACVR1				ACVR1
ACVR1B	ACVR1B	ACVR1B				ACVR1B
ACVR1B_ENST00000426655
ACVR1B_ENST00000541224	ACVR1B_ENST00000541224	ACVR1B_ENST00000541224
ACVR1C	ACVR1C	ACVR1C				ACVR1C
ACVR2A	ACVR2A	ACVR2A				ACVR2A
ACVR2B	ACVR2B	ACVR2B				ACVR2B
ACVR2B_ENST00000352511	ACVR2B_ENST00000352511	ACVR2B_ENST00000352511
ACVRL1	ACVRL1	ACVRL1				ACVRL1
ACVRL1_ENST00000550683	ACVRL1_ENST00000550683	ACVRL1_ENST00000550683
ACY1	ACY1					ACY1
ACY1_ENST00000458031	ACY1_ENST00000458031
ACY3	ACY3					ACY3
ACYP1						ACYP1
ACYP1_ENST00000357971
ACYP2						ACYP2
ACYP2_ENST00000406041
ADA	ADA					ADA
ADAD1	ADAD1	ADAD1				ADAD1
ADAD2	ADAD2	ADAD2				ADAD2
ADAL						ADAL
ADAL_ENST00000428046	ADAL_ENST00000428046
ADAM10	ADAM10	ADAM10				ADAM10
ADAM11	ADAM11	ADAM11				ADAM11
ADAM11_ENST00000200557	ADAM11_ENST00000200557	ADAM11_ENST00000200557
ADAM12	ADAM12	ADAM12				ADAM12
ADAM12_ENST00000368676	ADAM12_ENST00000368676	ADAM12_ENST00000368676
ADAM12_ENST00000368679	ADAM12_ENST00000368679	ADAM12_ENST00000368679
ADAM15	ADAM15	ADAM15				ADAM15
ADAM17	ADAM17	ADAM17				ADAM17
ADAM18	ADAM18	ADAM18				ADAM18
ADAM19	ADAM19	ADAM19				ADAM19
ADAM19_ENST00000257527	ADAM19_ENST00000257527	ADAM19_ENST00000257527
ADAM19_ENST00000394020	ADAM19_ENST00000394020	ADAM19_ENST00000394020
ADAM19_ENST00000430702	ADAM19_ENST00000430702	ADAM19_ENST00000430702
ADAM2	ADAM2	ADAM2				ADAM2
ADAM20	ADAM20	ADAM20				ADAM20
ADAM21	ADAM21	ADAM21				ADAM21
ADAM21_ENST00000267499	ADAM21_ENST00000267499	ADAM21_ENST00000267499
ADAM22	ADAM22	ADAM22				ADAM22
ADAM22_ENST00000265727	ADAM22_ENST00000265727	ADAM22_ENST00000265727
ADAM22_ENST00000315984	ADAM22_ENST00000315984	ADAM22_ENST00000315984
ADAM23	ADAM23	ADAM23				ADAM23
ADAM23_ENST00000374415	ADAM23_ENST00000374415	ADAM23_ENST00000374415
ADAM23_ENST00000374416	ADAM23_ENST00000374416	ADAM23_ENST00000374416
ADAM28	ADAM28	ADAM28				ADAM28
ADAM28_ENST00000437154	ADAM28_ENST00000437154	ADAM28_ENST00000437154
ADAM29	ADAM29	ADAM29				ADAM29
ADAM30	ADAM30	ADAM30				ADAM30
ADAM32	ADAM32	ADAM32				ADAM32
ADAM33	ADAM33	ADAM33				ADAM33
ADAM33_ENST00000358035
ADAM7	ADAM7	ADAM7				ADAM7
ADAM8_ENST00000445355
ADAM9	ADAM9	ADAM9				ADAM9
ADAMDEC1						ADAMDEC1
ADAMDEC1_ENST00000256412	ADAMDEC1_ENST00000256412	ADAMDEC1_ENST00000256412
ADAMTS1	ADAMTS1	ADAMTS1				ADAMTS1
ADAMTS10	ADAMTS10	ADAMTS10				ADAMTS10
ADAMTS12	ADAMTS12	ADAMTS12	ADAMTS12			ADAMTS12
ADAMTS12_ENST00000515401	ADAMTS12_ENST00000515401	ADAMTS12_ENST00000515401
ADAMTS13	ADAMTS13	ADAMTS13				ADAMTS13
ADAMTS13_ENST00000371911
ADAMTS14	ADAMTS14	ADAMTS14				ADAMTS14
ADAMTS14_ENST00000373208	ADAMTS14_ENST00000373208	ADAMTS14_ENST00000373208
ADAMTS16	ADAMTS16	ADAMTS16	ADAMTS16			ADAMTS16
ADAMTS16_ENST00000274181	ADAMTS16_ENST00000274181	ADAMTS16_ENST00000274181	ADAMTS16_ENST00000274181
ADAMTS17	ADAMTS17	ADAMTS17				ADAMTS17
ADAMTS18	ADAMTS18	ADAMTS18	ADAMTS18			ADAMTS18
ADAMTS19	ADAMTS19	ADAMTS19				ADAMTS19
ADAMTS19_ENST00000274487	ADAMTS19_ENST00000274487	ADAMTS19_ENST00000274487
ADAMTS2	ADAMTS2	ADAMTS2	ADAMTS2
ADAMTS2_ENST00000274609	ADAMTS2_ENST00000274609	ADAMTS2_ENST00000274609
ADAMTS20	ADAMTS20	ADAMTS20	ADAMTS20			ADAMTS20
ADAMTS20_ENST00000389420	ADAMTS20_ENST00000389420	ADAMTS20_ENST00000389420	ADAMTS20_ENST00000389420
ADAMTS20_ENST00000553158	ADAMTS20_ENST00000553158	ADAMTS20_ENST00000553158	ADAMTS20_ENST00000553158
ADAMTS3	ADAMTS3	ADAMTS3				ADAMTS3
ADAMTS4	ADAMTS4	ADAMTS4				ADAMTS4
ADAMTS4_ENST00000367995	ADAMTS4_ENST00000367995
ADAMTS4_ENST00000367996	ADAMTS4_ENST00000367996	ADAMTS4_ENST00000367996
ADAMTS5	ADAMTS5	ADAMTS5				ADAMTS5
ADAMTS6	ADAMTS6					ADAMTS6
ADAMTS6_ENST00000381055	ADAMTS6_ENST00000381055	ADAMTS6_ENST00000381055
ADAMTS6_ENST00000536360	ADAMTS6_ENST00000536360	ADAMTS6_ENST00000536360
ADAMTS7	ADAMTS7	ADAMTS7				ADAMTS7
ADAMTS8	ADAMTS8	ADAMTS8				ADAMTS8
ADAMTS8_ENST00000257359	ADAMTS8_ENST00000257359	ADAMTS8_ENST00000257359
ADAMTS8_ENST00000414575	ADAMTS8_ENST00000414575	ADAMTS8_ENST00000414575
ADAMTS9	ADAMTS9	ADAMTS9	ADAMTS9			ADAMTS9
ADAMTSL1	ADAMTSL1	ADAMTSL1				ADAMTSL1
ADAMTSL1_ENST00000380548	ADAMTSL1_ENST00000380548	ADAMTSL1_ENST00000380548	ADAMTSL1_ENST00000380548
ADAMTSL1_ENST00000380566	ADAMTSL1_ENST00000380566	ADAMTSL1_ENST00000380566
ADAMTSL2	ADAMTSL2	ADAMTSL2				ADAMTSL2
ADAMTSL2_ENST00000393061	ADAMTSL2_ENST00000393061	ADAMTSL2_ENST00000393061
ADAMTSL3	ADAMTSL3	ADAMTSL3	ADAMTSL3			ADAMTSL3
ADAMTSL3_ENST00000567476	ADAMTSL3_ENST00000567476	ADAMTSL3_ENST00000567476
ADAMTSL4	ADAMTSL4	ADAMTSL4				ADAMTSL4
ADAMTSL4_ENST00000369039	ADAMTSL4_ENST00000369039	ADAMTSL4_ENST00000369039
ADAMTSL4_ENST00000369041	ADAMTSL4_ENST00000369041	ADAMTSL4_ENST00000369041
ADAMTSL5	ADAMTSL5					ADAMTSL5
ADAP1	ADAP1					ADAP1
ADAP1_ENST00000539900	ADAP1_ENST00000539900
ADAP2	ADAP2					ADAP2
ADAR_ENST00000292205	ADAR_ENST00000292205	ADAR_ENST00000292205
ADARB1	ADARB1	ADARB1				ADARB1
ADARB1_ENST00000327861
ADARB1_ENST00000389863	ADARB1_ENST00000389863	ADARB1_ENST00000389863
ADARB2	ADARB2	ADARB2				ADARB2
ADARB2_ENST00000381310	ADARB2_ENST00000381310
ADAT1	ADAT1	ADAT1				ADAT1
ADAT2						ADAT2
ADAT2_ENST00000367593
ADAT3	ADAT3					ADAT3
ADC	ADC
ADC_ENST00000358680
ADC_ENST00000398167	ADC_ENST00000398167
ADCK1	ADCK1	ADCK1				ADCK1
ADCK1_ENST00000238561	ADCK1_ENST00000238561	ADCK1_ENST00000238561
ADCK2	ADCK2	ADCK2				ADCK2
ADCK3	ADCK3
ADCK3_ENST00000366779	ADCK3_ENST00000366779	ADCK3_ENST00000366779
ADCK4	ADCK4	ADCK4
ADCK4_ENST00000324464	ADCK4_ENST00000324464	ADCK4_ENST00000324464
ADCK5	ADCK5	ADCK5				ADCK5
ADCY1	ADCY1	ADCY1				ADCY1
ADCY10	ADCY10	ADCY10				ADCY10
ADCY2	ADCY2	ADCY2	ADCY2			ADCY2
ADCY2_ENST00000537121	ADCY2_ENST00000537121	ADCY2_ENST00000537121
ADCY3	ADCY3	ADCY3				ADCY3
ADCY4	ADCY4	ADCY4				ADCY4
ADCY5	ADCY5	ADCY5				ADCY5
ADCY6	ADCY6	ADCY6				ADCY6
ADCY7	ADCY7	ADCY7				ADCY7
ADCY8	ADCY8	ADCY8	ADCY8			ADCY8
ADCY9	ADCY9	ADCY9				ADCY9
ADCYAP1	ADCYAP1					ADCYAP1
ADCYAP1R1	ADCYAP1R1	ADCYAP1R1				ADCYAP1R1
ADD1	ADD1	ADD1				ADD1
ADD1_ENST00000398125	ADD1_ENST00000398125	ADD1_ENST00000398125
ADD2	ADD2	ADD2				ADD2
ADD2_ENST00000264436	ADD2_ENST00000264436	ADD2_ENST00000264436
ADD2_ENST00000430656	ADD2_ENST00000430656	ADD2_ENST00000430656
ADD3	ADD3	ADD3				ADD3
ADGB	ADGB	ADGB
ADGB_ENST00000367489
ADH1A	ADH1A	ADH1A				ADH1A
ADH1B	ADH1B	ADH1B				ADH1B
ADH4	ADH4					ADH4
ADH4_ENST00000265512
ADH4_ENST00000423445
ADH5	ADH5					ADH5
ADH6	ADH6	ADH6				ADH6
ADH6_ENST00000394899	ADH6_ENST00000394899	ADH6_ENST00000394899
ADH7	ADH7	ADH7				ADH7
ADH7_ENST00000476959	ADH7_ENST00000476959	ADH7_ENST00000476959
ADHFE1	ADHFE1	ADHFE1				ADHFE1
ADHFE1_ENST00000379385	ADHFE1_ENST00000379385
ADHFE1_ENST00000396623	ADHFE1_ENST00000396623	ADHFE1_ENST00000396623
ADI1						ADI1
ADIG						ADIG
ADIG_ENST00000537425
ADIPOQ	ADIPOQ					ADIPOQ
ADIPOR1	ADIPOR1					ADIPOR1
ADIPOR2	ADIPOR2					ADIPOR2
ADK	ADK					ADK
ADM						ADM
ADM2						ADM2
ADM2_ENST00000362068
ADNP	ADNP	ADNP				ADNP
ADNP2	ADNP2	ADNP2				ADNP2
ADO	ADO					ADO
ADORA1	ADORA1	ADORA1				ADORA1
ADORA1_ENST00000367235
ADORA2A	ADORA2A	ADORA2A				ADORA2A
ADORA2A-AS1
ADORA2B						ADORA2B
ADORA3	ADORA3					ADORA3
ADORA3_ENST00000369716	ADORA3_ENST00000369716	ADORA3_ENST00000369716
ADORA3_ENST00000369717	ADORA3_ENST00000369717
ADPGK	ADPGK					ADPGK
ADPRH	ADPRH					ADPRH
ADPRHL1	ADPRHL1					ADPRHL1
ADPRHL2	ADPRHL2					ADPRHL2
ADRA1A	ADRA1A	ADRA1A				ADRA1A
ADRA1A_ENST00000354550	ADRA1A_ENST00000354550	ADRA1A_ENST00000354550
ADRA1A_ENST00000358857	ADRA1A_ENST00000358857	ADRA1A_ENST00000358857
ADRA1A_ENST00000380572	ADRA1A_ENST00000380572	ADRA1A_ENST00000380572
ADRA1A_ENST00000380573	ADRA1A_ENST00000380573	ADRA1A_ENST00000380573
ADRA1A_ENST00000380581	ADRA1A_ENST00000380581	ADRA1A_ENST00000380581
ADRA1A_ENST00000380582	ADRA1A_ENST00000380582	ADRA1A_ENST00000380582
ADRA1A_ENST00000380587	ADRA1A_ENST00000380587
ADRA1B	ADRA1B	ADRA1B				ADRA1B
ADRA1D	ADRA1D	ADRA1D				ADRA1D
ADRA2A	ADRA2A	ADRA2A				ADRA2A
ADRA2A_ENST00000280155	ADRA2A_ENST00000280155
ADRA2C	ADRA2C					ADRA2C
ADRB1	ADRB1					ADRB1
ADRB2	ADRB2	ADRB2				ADRB2
ADRB3	ADRB3					ADRB3
ADRBK1	ADRBK1	ADRBK1
ADRBK2	ADRBK2	ADRBK2
ADRM1	ADRM1					ADRM1
ADSL	ADSL	ADSL				ADSL
ADSL_ENST00000216194	ADSL_ENST00000216194	ADSL_ENST00000216194
ADSL_ENST00000454266	ADSL_ENST00000454266
ADSS	ADSS					ADSS
ADSSL1	ADSSL1	ADSSL1				ADSSL1
ADSSL1_ENST00000330877
ADTRP	ADTRP					ADTRP
ADTRP_ENST00000229583	ADTRP_ENST00000229583
AEBP1	AEBP1	AEBP1				AEBP1
AEBP2						AEBP2
AEBP2_ENST00000360995
AEBP2_ENST00000398864	AEBP2_ENST00000398864
AEN	AEN					AEN
AEN_ENST00000379231	AEN_ENST00000379231
AES						AES
AF165138.7
AFAP1	AFAP1	AFAP1				AFAP1
AFAP1_ENST00000420658	AFAP1_ENST00000420658	AFAP1_ENST00000420658
AFAP1L1	AFAP1L1	AFAP1L1				AFAP1L1
AFAP1L2	AFAP1L2	AFAP1L2				AFAP1L2
AFAP1L2_ENST00000541919	AFAP1L2_ENST00000541919
AFAP1L2_ENST00000545353	AFAP1L2_ENST00000545353	AFAP1L2_ENST00000545353
AFF1_ENST00000395146	AFF1_ENST00000395146	AFF1_ENST00000395146
AFF2	AFF2	AFF2	AFF2
AFF2_ENST00000286437	AFF2_ENST00000286437	AFF2_ENST00000286437
AFF2_ENST00000370460	AFF2_ENST00000370460	AFF2_ENST00000370460	AFF2_ENST00000370460
AFF3	AFF3	AFF3	AFF3			AFF3
AFF4	AFF4	AFF4				AFF4
AFG3L2	AFG3L2	AFG3L2				AFG3L2	AFG3L2
AFM	AFM	AFM				AFM
AFMID	AFMID					AFMID
AFP	AFP	AFP				AFP
AFTPH	AFTPH	AFTPH				AFTPH
AFTPH_ENST00000238855	AFTPH_ENST00000238855	AFTPH_ENST00000238855
AGA	AGA					AGA
AGAP1	AGAP1	AGAP1				AGAP1
AGAP10
AGAP10_ENST00000355232
AGAP10_ENST00000413193
AGAP2	AGAP2	AGAP2				AGAP2
AGAP2_ENST00000547588	AGAP2_ENST00000547588	AGAP2_ENST00000547588
AGAP3	AGAP3	AGAP3				AGAP3
AGAP3_ENST00000473312	AGAP3_ENST00000473312
AGAP4	AGAP4
AGAP5	AGAP5	AGAP5
AGAP5_ENST00000374094	AGAP5_ENST00000374094	AGAP5_ENST00000374094
AGAP6	AGAP6	AGAP6
AGBL1	AGBL1	AGBL1				AGBL1
AGBL1_ENST00000389298	AGBL1_ENST00000389298	AGBL1_ENST00000389298
AGBL1_ENST00000441037	AGBL1_ENST00000441037	AGBL1_ENST00000441037
AGBL2	AGBL2	AGBL2				AGBL2
AGBL3	AGBL3	AGBL3				AGBL3
AGBL3_ENST00000359383
AGBL3_ENST00000458078	AGBL3_ENST00000458078	AGBL3_ENST00000458078
AGBL4	AGBL4	AGBL4				AGBL4
AGBL4_ENST00000371836	AGBL4_ENST00000371836
AGBL4_ENST00000371838	AGBL4_ENST00000371838
AGBL4_ENST00000416121
AGBL5	AGBL5	AGBL5				AGBL5
AGBL5_ENST00000323064	AGBL5_ENST00000323064	AGBL5_ENST00000323064
AGC1	AGC1	AGC1	AGC1
AGER	AGER					AGER
AGER_ENST00000375067
AGER_ENST00000375070
AGER_ENST00000438221	AGER_ENST00000438221
AGER_ENST00000450110
AGFG1	AGFG1					AGFG1
AGFG1_ENST00000409979	AGFG1_ENST00000409979
AGFG2	AGFG2	AGFG2				AGFG2
AGGF1	AGGF1	AGGF1				AGGF1
AGK	AGK	AGK				AGK
AGK_ENST00000492693
AGL	AGL	AGL				AGL
AGL_ENST00000361522	AGL_ENST00000361522	AGL_ENST00000361522
AGMAT	AGMAT					AGMAT
AGMO	AGMO	AGMO				AGMO
AGPAT1	AGPAT1					AGPAT1
AGPAT2	AGPAT2					AGPAT2
AGPAT3	AGPAT3					AGPAT3
AGPAT4	AGPAT4	AGPAT4				AGPAT4
AGPAT4_ENST00000366905
AGPAT4_ENST00000366906
AGPAT4_ENST00000366908
AGPAT4_ENST00000437165
AGPAT5	AGPAT5					AGPAT5
AGPAT6	AGPAT6	AGPAT6
AGPAT9	AGPAT9	AGPAT9
AGPHD1	AGPHD1
AGPHD1_ENST00000360519
AGPHD1_ENST00000408962
AGPS	AGPS	AGPS				AGPS
AGR2						AGR2
AGR2_ENST00000419572
AGR3						AGR3
AGRN	AGRN	AGRN				AGRN
AGRN_ENST00000419249
AGRP						AGRP
AGT	AGT	AGT				AGT
AGTPBP1	AGTPBP1	AGTPBP1				AGTPBP1
AGTPBP1_ENST00000357081	AGTPBP1_ENST00000357081	AGTPBP1_ENST00000357081
AGTPBP1_ENST00000376109	AGTPBP1_ENST00000376109	AGTPBP1_ENST00000376109
AGTR1	AGTR1	AGTR1				AGTR1
AGTR2	AGTR2	AGTR2
AGTRAP						AGTRAP
AGTRAP_ENST00000452018
AGXT	AGXT	AGXT				AGXT
AGXT2	AGXT2	AGXT2				AGXT2
AGXT2L1	AGXT2L1	AGXT2L1
AGXT2L2	AGXT2L2
AGXT2L2_ENST00000308158	AGXT2L2_ENST00000308158
AHCTF1	AHCTF1	AHCTF1				AHCTF1	AHCTF1
AHCTF1_ENST00000326225	AHCTF1_ENST00000326225	AHCTF1_ENST00000326225
AHCY	AHCY	AHCY				AHCY	AHCY
AHCYL1	AHCYL1					AHCYL1
AHCYL2	AHCYL2	AHCYL2				AHCYL2
AHCYL2_ENST00000474594	AHCYL2_ENST00000474594	AHCYL2_ENST00000474594
AHCYL2_ENST00000531335	AHCYL2_ENST00000531335
AHDC1	AHDC1	AHDC1				AHDC1
AHI1	AHI1	AHI1				AHI1
AHI1_ENST00000327035	AHI1_ENST00000327035	AHI1_ENST00000327035
AHI1_ENST00000367798
AHI1_ENST00000417892
AHNAK	AHNAK	AHNAK	AHNAK			AHNAK
AHNAK_ENST00000257247
AHNAK_ENST00000378024	AHNAK_ENST00000378024	AHNAK_ENST00000378024	AHNAK_ENST00000378024
AHNAK2	AHNAK2	AHNAK2
AHNAK2_ENST00000333244	AHNAK2_ENST00000333244	AHNAK2_ENST00000333244	AHNAK2_ENST00000333244
AHR	AHR	AHR				AHR
AHRR	AHRR	AHRR				AHRR
AHSA1	AHSA1					AHSA1
AHSA2
AHSA2_ENST00000430934
AHSG	AHSG	AHSG				AHSG
AHSP						AHSP
AICDA	AICDA	AICDA				AICDA
AIDA	AIDA					AIDA
AIDA_ENST00000541237
AIF1						AIF1
AIF1_ENST00000337917
AIF1_ENST00000376051
AIF1L						AIF1L
AIF1L_ENST00000372309
AIFM1	AIFM1	AIFM1
AIFM2	AIFM2					AIFM2
AIFM3	AIFM3	AIFM3				AIFM3
AIFM3_ENST00000335375	AIFM3_ENST00000335375	AIFM3_ENST00000335375
AIFM3_ENST00000405089	AIFM3_ENST00000405089	AIFM3_ENST00000405089
AIG1						AIG1
AIG1_ENST00000275235
AIM1	AIM1	AIM1
AIM1_ENST00000535438	AIM1_ENST00000535438
AIM1L	AIM1L	AIM1L
AIM1L_ENST00000449629
AIM1L_ENST00000475866	AIM1L_ENST00000475866
AIM1L_ENST00000527815	AIM1L_ENST00000527815	AIM1L_ENST00000527815
AIM2	AIM2	AIM2				AIM2
AIMP1	AIMP1					AIMP1
AIMP1_ENST00000394701
AIMP2	AIMP2					AIMP2
AIP	AIP					AIP
AIPL1	AIPL1	AIPL1				AIPL1
AIRE	AIRE	AIRE				AIRE
AIRE_ENST00000397994	AIRE_ENST00000397994
AJAP1	AJAP1	AJAP1				AJAP1
AK1						AK1
AK2						AK2
AK2_ENST00000354858	AK2_ENST00000354858
AK2_ENST00000373449	AK2_ENST00000373449
AK3						AK3
AK4						AK4
AK5	AK5	AK5				AK5
AK7	AK7	AK7				AK7
AK8	AK8	AK8				AK8
AKAP1	AKAP1	AKAP1				AKAP1
AKAP1_ENST00000314126	AKAP1_ENST00000314126	AKAP1_ENST00000314126
AKAP10	AKAP10					AKAP10
AKAP11	AKAP11	AKAP11				AKAP11
AKAP12_ENST00000354675
AKAP12_ENST00000359755	AKAP12_ENST00000359755	AKAP12_ENST00000359755
AKAP13	AKAP13	AKAP13	AKAP13			AKAP13
AKAP13_ENST00000394518	AKAP13_ENST00000394518	AKAP13_ENST00000394518	AKAP13_ENST00000394518
AKAP13_ENST00000426424	AKAP13_ENST00000426424
AKAP13_ENST00000560302
AKAP14
AKAP14_ENST00000371423
AKAP16BP
AKAP17A	AKAP17A	AKAP17A
AKAP17A_ENST00000313871	AKAP17A_ENST00000313871
AKAP17A_ENST00000381261	AKAP17A_ENST00000381261	AKAP17A_ENST00000381261
AKAP2	AKAP2	AKAP2
AKAP3	AKAP3	AKAP3				AKAP3
AKAP3_ENST00000545990	AKAP3_ENST00000545990	AKAP3_ENST00000545990
AKAP4	AKAP4	AKAP4
AKAP5	AKAP5					AKAP5
AKAP6	AKAP6	AKAP6	AKAP6			AKAP6
AKAP7	AKAP7					AKAP7
AKAP7_ENST00000474850
AKAP8	AKAP8	AKAP8				AKAP8
AKAP8L	AKAP8L	AKAP8L				AKAP8L
AKAP8L_ENST00000397410	AKAP8L_ENST00000397410	AKAP8L_ENST00000397410
AKAP9	AKAP9	AKAP9	AKAP9			AKAP9
AKAP9_ENST00000356239	AKAP9_ENST00000356239	AKAP9_ENST00000356239	AKAP9_ENST00000356239
AKD1	AKD1
AKD1_ENST00000341338	AKD1_ENST00000341338
AKD1_ENST00000424296	AKD1_ENST00000424296	AKD1_ENST00000424296
AKIP1						AKIP1
AKIRIN1						AKIRIN1
AKIRIN2						AKIRIN2	AKIRIN2
AKNA	AKNA	AKNA				AKNA
AKNA_ENST00000374075
AKNAD1	AKNAD1	AKNAD1				AKNAD1
AKNAD1_ENST00000357393	AKNAD1_ENST00000357393
AKNAD1_ENST00000369995	AKNAD1_ENST00000369995	AKNAD1_ENST00000369995
AKR1B10	AKR1B10					AKR1B10
AKR1B15	AKR1B15					AKR1B15
AKR1B15_ENST00000423958	AKR1B15_ENST00000423958
AKR1B15_ENST00000457545	AKR1B15_ENST00000457545
AKR1B1P8
AKR1C1	AKR1C1
AKR1C1_ENST00000380859
AKR1C2						AKR1C2
AKR1C2_ENST00000455190
AKR1C3	AKR1C3
AKR1C4	AKR1C4
AKR1CL1
AKR1CL1_ENST00000445191
AKR1CL1_ENST00000473890
AKR1D1	AKR1D1	AKR1D1				AKR1D1
AKR1E2	AKR1E2					AKR1E2
AKR7A2	AKR7A2					AKR7A2
AKR7A3	AKR7A3					AKR7A3
AKR7L
AKT1	AKT1	AKT1	AKT1			AKT1
AKT1S1	AKT1S1					AKT1S1
AKT2	AKT2	AKT2
AKT3	AKT3	AKT3				AKT3
AKT3_ENST00000336199	AKT3_ENST00000336199	AKT3_ENST00000336199
AKT3_ENST00000366539	AKT3_ENST00000366539	AKT3_ENST00000366539
AKTIP	AKTIP					AKTIP
AL078585.1
AL118506.1
AL121675_36-2
AL122001_32
AL138764.1
AL138764.1_ENST00000429930
AL161645_14
AL359853.2
AL359853.2_ENST00000553856
AL445989.1
AL445989.1_ENST00000453638
AL512274_9
AL589988.1	AL589988.1	AL589988.1
ALAD	ALAD					ALAD
ALAD_ENST00000409155	ALAD_ENST00000409155
ALAD_ENST00000448137
ALAS1	ALAS1	ALAS1				ALAS1
ALAS2	ALAS2	ALAS2
ALAS2_ENST00000330807	ALAS2_ENST00000330807	ALAS2_ENST00000330807
ALAS2_ENST00000396198	ALAS2_ENST00000396198	ALAS2_ENST00000396198
ALAS2_ENST00000455688
ALB	ALB	ALB				ALB
ALCAM	ALCAM	ALCAM				ALCAM
ALDH16A1	ALDH16A1	ALDH16A1				ALDH16A1
ALDH18A1	ALDH18A1	ALDH18A1				ALDH18A1
ALDH1A1_ENST00000428593	ALDH1A1_ENST00000428593
ALDH1A2	ALDH1A2	ALDH1A2				ALDH1A2
ALDH1A3	ALDH1A3	ALDH1A3				ALDH1A3
ALDH1B1	ALDH1B1	ALDH1B1				ALDH1B1
ALDH1L1	ALDH1L1	ALDH1L1				ALDH1L1
ALDH1L1_ENST00000455064
ALDH1L2	ALDH1L2	ALDH1L2				ALDH1L2
ALDH2	ALDH2	ALDH2				ALDH2
ALDH2_ENST00000261733	ALDH2_ENST00000261733	ALDH2_ENST00000261733
ALDH3A1	ALDH3A1	ALDH3A1				ALDH3A1
ALDH3A2	ALDH3A2					ALDH3A2
ALDH3A2_ENST00000176643	ALDH3A2_ENST00000176643
ALDH3B2	ALDH3B2	ALDH3B2				ALDH3B2
ALDH4A1	ALDH4A1	ALDH4A1				ALDH4A1
ALDH4A1_ENST00000375341	ALDH4A1_ENST00000375341	ALDH4A1_ENST00000375341
ALDH5A1	ALDH5A1	ALDH5A1				ALDH5A1
ALDH6A1	ALDH6A1	ALDH6A1				ALDH6A1
ALDH7A1	ALDH7A1					ALDH7A1
ALDH7A1_ENST00000447989	ALDH7A1_ENST00000447989
ALDH8A1	ALDH8A1	ALDH8A1				ALDH8A1
ALDH9A1	ALDH9A1					ALDH9A1
ALDH9A1_ENST00000354775	ALDH9A1_ENST00000354775
ALDOA	ALDOA					ALDOA	ALDOA
ALDOB	ALDOB	ALDOB				ALDOB
ALDOC	ALDOC					ALDOC
ALG1	ALG1	ALG1				ALG1	ALG1
ALG10	ALG10	ALG10
ALG10B	ALG10B	ALG10B
ALG11	ALG11					ALG11	ALG11
ALG12	ALG12					ALG12
ALG13	ALG13
ALG13_ENST00000251943	ALG13_ENST00000251943	ALG13_ENST00000251943
ALG13_ENST00000394780	ALG13_ENST00000394780	ALG13_ENST00000394780
ALG14						ALG14	ALG14
ALG1L
ALG2	ALG2					ALG2	ALG2
ALG2_ENST00000319033	ALG2_ENST00000319033
ALG3	ALG3					ALG3
ALG3_ENST00000445626	ALG3_ENST00000445626
ALG5	ALG5					ALG5
ALG6	ALG6					ALG6
ALG6_ENST00000263440
ALG8	ALG8					ALG8
ALG8_ENST00000376156
ALG9	ALG9					ALG9
ALG9_ENST00000428306	ALG9_ENST00000428306	ALG9_ENST00000428306
ALK	ALK	ALK	ALK			ALK
ALK_ENST00000431873	ALK_ENST00000431873	ALK_ENST00000431873
ALKBH1	ALKBH1					ALKBH1
ALKBH3	ALKBH3					ALKBH3
ALKBH3_ENST00000378840
ALKBH4	ALKBH4					ALKBH4
ALKBH5	ALKBH5					ALKBH5
ALKBH6						ALKBH6
ALKBH7						ALKBH7
ALKBH8						ALKBH8
ALKBH8_ENST00000417449	ALKBH8_ENST00000417449	ALKBH8_ENST00000417449
ALKBH8_ENST00000428149	ALKBH8_ENST00000428149	ALKBH8_ENST00000428149
ALKBH8_ENST00000429370
ALLC	ALLC	ALLC				ALLC
ALOX12	ALOX12	ALOX12				ALOX12
ALOX12B	ALOX12B	ALOX12B				ALOX12B
ALOX12B_ENST00000319144	ALOX12B_ENST00000319144	ALOX12B_ENST00000319144
ALOX12P2
ALOX15	ALOX15	ALOX15				ALOX15
ALOX15_ENST00000545513	ALOX15_ENST00000545513	ALOX15_ENST00000545513
ALOX15B	ALOX15B	ALOX15B				ALOX15B
ALOX5	ALOX5	ALOX5				ALOX5
ALOX5AP						ALOX5AP
ALOXE3	ALOXE3	ALOXE3				ALOXE3
ALOXE3_ENST00000318227	ALOXE3_ENST00000318227	ALOXE3_ENST00000318227
ALPI	ALPI	ALPI				ALPI
ALPK1	ALPK1	ALPK1				ALPK1
ALPK2	ALPK2	ALPK2				ALPK2
ALPK2_ENST00000361673	ALPK2_ENST00000361673	ALPK2_ENST00000361673	ALPK2_ENST00000361673
ALPK3	ALPK3	ALPK3				ALPK3
ALPK3_ENST00000258888	ALPK3_ENST00000258888	ALPK3_ENST00000258888
ALPL	ALPL	ALPL				ALPL
ALPP	ALPP	ALPP				ALPP
ALPPL2	ALPPL2	ALPPL2
ALS2	ALS2	ALS2				ALS2
ALS2_ENST00000467448	ALS2_ENST00000467448
ALS2CL	ALS2CL	ALS2CL				ALS2CL
ALS2CR11	ALS2CR11	ALS2CR11
ALS2CR11_ENST00000439140	ALS2CR11_ENST00000439140	ALS2CR11_ENST00000439140
ALS2CR11_ENST00000450242	ALS2CR11_ENST00000450242	ALS2CR11_ENST00000450242
ALS2CR12	ALS2CR12					ALS2CR12
ALS2CR8	ALS2CR8	ALS2CR8
ALX1	ALX1	ALX1				ALX1
ALX3						ALX3
ALX4	ALX4	ALX4				ALX4
ALYREF						ALYREF
AMAC1	AMAC1	AMAC1
AMAC1L2	AMAC1L2	AMAC1L2
AMACR	AMACR	AMACR				AMACR
AMACR_ENST00000441713
AMBN	AMBN	AMBN				AMBN
AMBP	AMBP	AMBP				AMBP
AMBP_ENST00000540645	AMBP_ENST00000540645
AMBRA1	AMBRA1	AMBRA1				AMBRA1
AMBRA1_ENST00000458649	AMBRA1_ENST00000458649	AMBRA1_ENST00000458649
AMD1	AMD1					AMD1
AMDHD1	AMDHD1	AMDHD1				AMDHD1
AMDHD2	AMDHD2					AMDHD2
AMDHD2_ENST00000413459	AMDHD2_ENST00000413459	AMDHD2_ENST00000413459
AMELX	AMELX
AMELY
AMELY_ENST00000383036
AMER1	AMER1	AMER1	AMER1
AMFR	AMFR	AMFR				AMFR
AMH	AMH					AMH
AMHR2	AMHR2	AMHR2				AMHR2
AMICA1	AMICA1
AMICA1_ENST00000356289	AMICA1_ENST00000356289
AMIGO1	AMIGO1					AMIGO1
AMIGO2	AMIGO2	AMIGO2				AMIGO2
AMIGO3	AMIGO3	AMIGO3				AMIGO3
AMMECR1	AMMECR1
AMMECR1L	AMMECR1L					AMMECR1L
AMN	AMN					AMN
AMN1	AMN1					AMN1
AMOT	AMOT	AMOT
AMOT_ENST00000371958	AMOT_ENST00000371958	AMOT_ENST00000371958
AMOT_ENST00000371959	AMOT_ENST00000371959	AMOT_ENST00000371959
AMOTL1	AMOTL1	AMOTL1				AMOTL1
AMOTL2	AMOTL2	AMOTL2				AMOTL2
AMPD1	AMPD1	AMPD1				AMPD1
AMPD1_ENST00000520113	AMPD1_ENST00000520113	AMPD1_ENST00000520113
AMPD2						AMPD2
AMPD2_ENST00000393688	AMPD2_ENST00000393688	AMPD2_ENST00000393688
AMPD2_ENST00000393689	AMPD2_ENST00000393689	AMPD2_ENST00000393689
AMPD3	AMPD3	AMPD3				AMPD3
AMPH	AMPH	AMPH				AMPH
AMPH_ENST00000428293	AMPH_ENST00000428293	AMPH_ENST00000428293
AMT	AMT					AMT
AMTN	AMTN					AMTN
AMY1A
AMY1B
AMY1C
AMY2A	AMY2A
AMY2B	AMY2B	AMY2B
AMZ1	AMZ1	AMZ1				AMZ1
AMZ2						AMZ2
ANAPC1	ANAPC1	ANAPC1				ANAPC1	ANAPC1
ANAPC10						ANAPC10
ANAPC11						ANAPC11	ANAPC11
ANAPC13						ANAPC13
ANAPC16						ANAPC16
ANAPC2	ANAPC2	ANAPC2				ANAPC2	ANAPC2
ANAPC4	ANAPC4	ANAPC4				ANAPC4	ANAPC4
ANAPC5	ANAPC5	ANAPC5				ANAPC5	ANAPC5
ANAPC7	ANAPC7	ANAPC7				ANAPC7
ANAPC7_ENST00000455511	ANAPC7_ENST00000455511	ANAPC7_ENST00000455511
ANG						ANG
ANGEL1	ANGEL1	ANGEL1				ANGEL1
ANGEL2	ANGEL2					ANGEL2
ANGPT1	ANGPT1	ANGPT1				ANGPT1
ANGPT2	ANGPT2	ANGPT2				ANGPT2
ANGPT2_ENST00000325203	ANGPT2_ENST00000325203	ANGPT2_ENST00000325203
ANGPT4	ANGPT4	ANGPT4				ANGPT4
ANGPTL1	ANGPTL1	ANGPTL1				ANGPTL1
ANGPTL2	ANGPTL2	ANGPTL2				ANGPTL2
ANGPTL3	ANGPTL3					ANGPTL3
ANGPTL4	ANGPTL4	ANGPTL4				ANGPTL4
ANGPTL5	ANGPTL5	ANGPTL5				ANGPTL5
ANGPTL6	ANGPTL6					ANGPTL6
ANGPTL7	ANGPTL7					ANGPTL7
ANHX	ANHX					ANHX
ANK1	ANK1	ANK1	ANK1			ANK1
ANK1_ENST00000265709	ANK1_ENST00000265709	ANK1_ENST00000265709	ANK1_ENST00000265709
ANK1_ENST00000314214
ANK2	ANK2	ANK2	ANK2			ANK2
ANK2_ENST00000506722	ANK2_ENST00000506722	ANK2_ENST00000506722	ANK2_ENST00000506722
ANK3	ANK3	ANK3	ANK3			ANK3
ANK3_ENST00000355288	ANK3_ENST00000355288	ANK3_ENST00000355288
ANK3_ENST00000395293	ANK3_ENST00000395293	ANK3_ENST00000395293
ANKAR	ANKAR	ANKAR				ANKAR
ANKAR_ENST00000281412
ANKAR_ENST00000520309	ANKAR_ENST00000520309	ANKAR_ENST00000520309
ANKDD1A	ANKDD1A					ANKDD1A
ANKDD1A_ENST00000395720
ANKDD1A_ENST00000496660
ANKFN1	ANKFN1	ANKFN1				ANKFN1
ANKFY1	ANKFY1	ANKFY1				ANKFY1
ANKFY1_ENST00000433651	ANKFY1_ENST00000433651
ANKFY1_ENST00000570535	ANKFY1_ENST00000570535	ANKFY1_ENST00000570535
ANKH	ANKH	ANKH				ANKH
ANKHD1	ANKHD1	ANKHD1
ANKHD1_ENST00000261805	ANKHD1_ENST00000261805	ANKHD1_ENST00000261805
ANKHD1_ENST00000394723	ANKHD1_ENST00000394723
ANKHD1-EIF4EBP3	ANKHD1-EIF4EBP3	ANKHD1-EIF4EBP3
ANKIB1	ANKIB1	ANKIB1				ANKIB1
ANKK1	ANKK1	ANKK1				ANKK1
ANKLE1	ANKLE1	ANKLE1				ANKLE1
ANKLE1_ENST00000433424	ANKLE1_ENST00000433424
ANKLE2	ANKLE2	ANKLE2				ANKLE2	ANKLE2
ANKLE2_ENST00000337516	ANKLE2_ENST00000337516	ANKLE2_ENST00000337516
ANKMY1	ANKMY1	ANKMY1				ANKMY1
ANKMY1_ENST00000361678	ANKMY1_ENST00000361678	ANKMY1_ENST00000361678
ANKMY1_ENST00000405523	ANKMY1_ENST00000405523	ANKMY1_ENST00000405523
ANKMY2	ANKMY2					ANKMY2
ANKRA2						ANKRA2
ANKRD1	ANKRD1					ANKRD1
ANKRD10	ANKRD10					ANKRD10
ANKRD10_ENST00000375758
ANKRD11	ANKRD11	ANKRD11	ANKRD11			ANKRD11
ANKRD12	ANKRD12	ANKRD12				ANKRD12
ANKRD13A	ANKRD13A					ANKRD13A
ANKRD13B	ANKRD13B	ANKRD13B				ANKRD13B
ANKRD13C	ANKRD13C	ANKRD13C				ANKRD13C
ANKRD13D	ANKRD13D	ANKRD13D				ANKRD13D
ANKRD13D_ENST00000511455	ANKRD13D_ENST00000511455	ANKRD13D_ENST00000511455
ANKRD16	ANKRD16					ANKRD16
ANKRD17	ANKRD17	ANKRD17	ANKRD17			ANKRD17
ANKRD18A	ANKRD18A	ANKRD18A				ANKRD18A
ANKRD18A_ENST00000313339
ANKRD18B	ANKRD18B	ANKRD18B
ANKRD18B_ENST00000357927	ANKRD18B_ENST00000357927	ANKRD18B_ENST00000357927
ANKRD2	ANKRD2					ANKRD2
ANKRD20A2	ANKRD20A2
ANKRD20A4	ANKRD20A4	ANKRD20A4
ANKRD20A5P
ANKRD22	ANKRD22					ANKRD22
ANKRD23	ANKRD23					ANKRD23
ANKRD24	ANKRD24	ANKRD24				ANKRD24
ANKRD24_ENST00000262970	ANKRD24_ENST00000262970	ANKRD24_ENST00000262970
ANKRD24_ENST00000318934	ANKRD24_ENST00000318934	ANKRD24_ENST00000318934
ANKRD26	ANKRD26	ANKRD26				ANKRD26
ANKRD26_ENST00000376070	ANKRD26_ENST00000376070	ANKRD26_ENST00000376070
ANKRD26_ENST00000436985	ANKRD26_ENST00000436985	ANKRD26_ENST00000436985
ANKRD26_ENST00000445828
ANKRD27	ANKRD27	ANKRD27				ANKRD27
ANKRD28	ANKRD28					ANKRD28
ANKRD28_ENST00000383777	ANKRD28_ENST00000383777	ANKRD28_ENST00000383777
ANKRD29	ANKRD29					ANKRD29
ANKRD30A	ANKRD30A	ANKRD30A	ANKRD30A			ANKRD30A
ANKRD30A_ENST00000602533	ANKRD30A_ENST00000602533	ANKRD30A_ENST00000602533	ANKRD30A_ENST00000602533
ANKRD30B	ANKRD30B	ANKRD30B				ANKRD30B
ANKRD30B_ENST00000358984	ANKRD30B_ENST00000358984	ANKRD30B_ENST00000358984
ANKRD30BL
ANKRD30BL_ENST00000409867
ANKRD31	ANKRD31					ANKRD31
ANKRD31_ENST00000274361	ANKRD31_ENST00000274361	ANKRD31_ENST00000274361
ANKRD32	ANKRD32
ANKRD32_ENST00000265140	ANKRD32_ENST00000265140	ANKRD32_ENST00000265140
ANKRD33	ANKRD33	ANKRD33				ANKRD33
ANKRD33_ENST00000340970	ANKRD33_ENST00000340970
ANKRD34A	ANKRD34A	ANKRD34A				ANKRD34A
ANKRD34B	ANKRD34B	ANKRD34B				ANKRD34B
ANKRD34C	ANKRD34C	ANKRD34C				ANKRD34C
ANKRD35	ANKRD35	ANKRD35				ANKRD35
ANKRD36	ANKRD36	ANKRD36
ANKRD36_ENST00000420699	ANKRD36_ENST00000420699	ANKRD36_ENST00000420699
ANKRD36BP1
ANKRD36BP1_ENST00000358576
ANKRD36C	ANKRD36C	ANKRD36C
ANKRD36C_ENST00000295246	ANKRD36C_ENST00000295246
ANKRD36C_ENST00000420871	ANKRD36C_ENST00000420871	ANKRD36C_ENST00000420871
ANKRD37						ANKRD37
ANKRD39						ANKRD39
ANKRD40	ANKRD40					ANKRD40
ANKRD42	ANKRD42					ANKRD42
ANKRD42_ENST00000393389
ANKRD43	ANKRD43
ANKRD44	ANKRD44	ANKRD44				ANKRD44
ANKRD44_ENST00000282272	ANKRD44_ENST00000282272	ANKRD44_ENST00000282272
ANKRD44_ENST00000337207	ANKRD44_ENST00000337207	ANKRD44_ENST00000337207
ANKRD44_ENST00000409153	ANKRD44_ENST00000409153
ANKRD44_ENST00000409919	ANKRD44_ENST00000409919
ANKRD44_ENST00000424317	ANKRD44_ENST00000424317	ANKRD44_ENST00000424317
ANKRD45	ANKRD45					ANKRD45
ANKRD46	ANKRD46					ANKRD46
ANKRD46_ENST00000520552
ANKRD49						ANKRD49
ANKRD5	ANKRD5	ANKRD5
ANKRD50	ANKRD50	ANKRD50				ANKRD50
ANKRD52	ANKRD52	ANKRD52				ANKRD52
ANKRD53	ANKRD53					ANKRD53
ANKRD53_ENST00000360589	ANKRD53_ENST00000360589
ANKRD54						ANKRD54
ANKRD54_ENST00000458278
ANKRD55	ANKRD55	ANKRD55				ANKRD55
ANKRD56	ANKRD56	ANKRD56
ANKRD57	ANKRD57
ANKRD58	ANKRD58
ANKRD6	ANKRD6	ANKRD6				ANKRD6
ANKRD60
ANKRD62	ANKRD62					ANKRD62
ANKRD62_ENST00000586406
ANKRD63
ANKRD65						ANKRD65
ANKRD65_ENST00000537107
ANKRD7	ANKRD7					ANKRD7
ANKRD9						ANKRD9
ANKS1A	ANKS1A	ANKS1A				ANKS1A
ANKS1A_ENST00000373990	ANKS1A_ENST00000373990	ANKS1A_ENST00000373990
ANKS1B	ANKS1B	ANKS1B				ANKS1B
ANKS1B_ENST00000329257	ANKS1B_ENST00000329257	ANKS1B_ENST00000329257
ANKS1B_ENST00000332712	ANKS1B_ENST00000332712	ANKS1B_ENST00000332712
ANKS1B_ENST00000549493	ANKS1B_ENST00000549493	ANKS1B_ENST00000549493
ANKS3	ANKS3	ANKS3				ANKS3
ANKS3_ENST00000450067
ANKS4B	ANKS4B	ANKS4B				ANKS4B
ANKS6	ANKS6	ANKS6				ANKS6
ANKUB1	ANKUB1
ANKZF1	ANKZF1	ANKZF1				ANKZF1
ANLN	ANLN	ANLN				ANLN
ANO1	ANO1	ANO1				ANO1
ANO1_ENST00000316296	ANO1_ENST00000316296	ANO1_ENST00000316296
ANO1_ENST00000355303	ANO1_ENST00000355303	ANO1_ENST00000355303
ANO10	ANO10	ANO10				ANO10
ANO2	ANO2	ANO2
ANO2_ENST00000327087	ANO2_ENST00000327087	ANO2_ENST00000327087
ANO2_ENST00000356134	ANO2_ENST00000356134	ANO2_ENST00000356134
ANO2_ENST00000546188	ANO2_ENST00000546188	ANO2_ENST00000546188
ANO3	ANO3	ANO3				ANO3
ANO4	ANO4	ANO4				ANO4
ANO4_ENST00000538618	ANO4_ENST00000538618
ANO5	ANO5	ANO5				ANO5
ANO6	ANO6	ANO6				ANO6
ANO6_ENST00000425752	ANO6_ENST00000425752	ANO6_ENST00000425752
ANO6_ENST00000441606	ANO6_ENST00000441606	ANO6_ENST00000441606
ANO7	ANO7	ANO7				ANO7
ANO7_ENST00000402430	ANO7_ENST00000402430	ANO7_ENST00000402430
ANO7_ENST00000402530
ANO8	ANO8	ANO8				ANO8
ANO9	ANO9	ANO9				ANO9
ANP32A	ANP32A					ANP32A
ANP32B						ANP32B
ANP32C	ANP32C	ANP32C
ANP32D						ANP32D
ANP32E	ANP32E					ANP32E
ANPEP	ANPEP	ANPEP				ANPEP
ANTXR1	ANTXR1	ANTXR1				ANTXR1
ANTXR1_ENST00000409349	ANTXR1_ENST00000409349
ANTXR1_ENST00000409829	ANTXR1_ENST00000409829
ANTXR2	ANTXR2	ANTXR2				ANTXR2
ANTXR2_ENST00000295465	ANTXR2_ENST00000295465
ANTXR2_ENST00000403729	ANTXR2_ENST00000403729	ANTXR2_ENST00000403729
ANUBL1	ANUBL1	ANUBL1
ANXA1	ANXA1					ANXA1
ANXA1_ENST00000456643
ANXA10	ANXA10	ANXA10				ANXA10
ANXA11	ANXA11					ANXA11
ANXA11_ENST00000447489
ANXA13	ANXA13	ANXA13				ANXA13
ANXA2	ANXA2					ANXA2
ANXA3	ANXA3					ANXA3
ANXA4	ANXA4					ANXA4
ANXA5						ANXA5
ANXA6	ANXA6	ANXA6				ANXA6
ANXA6_ENST00000354546	ANXA6_ENST00000354546	ANXA6_ENST00000354546
ANXA7	ANXA7					ANXA7
ANXA9	ANXA9					ANXA9
AOAH	AOAH	AOAH				AOAH
AOC2	AOC2	AOC2				AOC2
AOC3	AOC3	AOC3				AOC3
AOF2	AOF2	AOF2
AOX1	AOX1	AOX1				AOX1
AP000867.1
AP000867.1_ENST00000343767
AP001011.2_ENST00000261598	AP001011.2_ENST00000261598	AP001011.2_ENST00000261598
AP001011.3_ENST00000320876	AP001011.3_ENST00000320876	AP001011.3_ENST00000320876
AP002414.1
AP002414.1_ENST00000391405
AP005901_2	AP005901_2
AP1AR	AP1AR					AP1AR
AP1B1	AP1B1	AP1B1			AP1B1	AP1B1		AP1B1
AP1B1_ENST00000415447	AP1B1_ENST00000415447	AP1B1_ENST00000415447
AP1G1	AP1G1	AP1G1				AP1G1
AP1G1_ENST00000393512	AP1G1_ENST00000393512	AP1G1_ENST00000393512
AP1G1_ENST00000423132	AP1G1_ENST00000423132	AP1G1_ENST00000423132
AP1G1_ENST00000433195	AP1G1_ENST00000433195	AP1G1_ENST00000433195
AP1G2	AP1G2	AP1G2				AP1G2
AP1G2_ENST00000535852	AP1G2_ENST00000535852	AP1G2_ENST00000535852
AP1M1	AP1M1	AP1M1				AP1M1
AP1M1_ENST00000444449	AP1M1_ENST00000444449
AP1M2	AP1M2					AP1M2
AP1M2_ENST00000590923
AP1S1						AP1S1
AP1S2
AP1S2_ENST00000329235
AP1S2_ENST00000421527
AP1S2_ENST00000545766
AP1S3						AP1S3
AP1S3_ENST00000423110
AP1S3_ENST00000446015
AP2A1	AP2A1	AP2A1				AP2A1
AP2A1_ENST00000359032	AP2A1_ENST00000359032	AP2A1_ENST00000359032
AP2A2	AP2A2	AP2A2				AP2A2
AP2M1	AP2M1	AP2M1				AP2M1
AP3B1	AP3B1	AP3B1				AP3B1
AP3B2	AP3B2	AP3B2				AP3B2
AP3D1_ENST00000355272	AP3D1_ENST00000355272	AP3D1_ENST00000355272
AP3D1_ENST00000356926	AP3D1_ENST00000356926	AP3D1_ENST00000356926
AP3M1	AP3M1					AP3M1
AP3M2	AP3M2					AP3M2
AP3S1	AP3S1					AP3S1
AP3S2						AP3S2
AP4B1	AP4B1	AP4B1				AP4B1
AP4B1_ENST00000369566	AP4B1_ENST00000369566
AP4E1	AP4E1	AP4E1				AP4E1
AP4M1	AP4M1	AP4M1				AP4M1
AP4S1						AP4S1
AP4S1_ENST00000542754
AP5B1	AP5B1	AP5B1				AP5B1
AP5B1_ENST00000532090	AP5B1_ENST00000532090	AP5B1_ENST00000532090
APAF1	APAF1	APAF1				APAF1
APBA1	APBA1	APBA1				APBA1
APBA2	APBA2	APBA2				APBA2
APBA3	APBA3					APBA3
APBB1	APBB1	APBB1				APBB1
APBB1_ENST00000389906	APBB1_ENST00000389906	APBB1_ENST00000389906
APBB1IP	APBB1IP	APBB1IP				APBB1IP
APBB1IP_ENST00000356785	APBB1IP_ENST00000356785
APBB1IP_ENST00000376236	APBB1IP_ENST00000376236	APBB1IP_ENST00000376236
APBB2	APBB2	APBB2				APBB2
APBB2_ENST00000295974	APBB2_ENST00000295974	APBB2_ENST00000295974
APBB3	APBB3	APBB3				APBB3
APC	APC	APC	APC			APC
APC2	APC2	APC2				APC2
APCDD1	APCDD1	APCDD1				APCDD1
APCDD1L	APCDD1L	APCDD1L				APCDD1L
APCDD1L_ENST00000439429	APCDD1L_ENST00000439429	APCDD1L_ENST00000439429
APCS	APCS	APCS				APCS
APEH	APEH	APEH				APEH
APEX1	APEX1					APEX1
APEX2	APEX2	APEX2
APH1A	APH1A					APH1A
APH1A_ENST00000369109	APH1A_ENST00000369109
APH1B						APH1B
API5	API5					API5
API5_ENST00000531273	API5_ENST00000531273
API5_ENST00000534600	API5_ENST00000534600
APIP						APIP
APIP_ENST00000278359
APITD1
APITD1_ENST00000309048
APLF	APLF					APLF
APLN
APLN_ENST00000429967
APLNR	APLNR	APLNR				APLNR
APLP1	APLP1	APLP1				APLP1
APLP2	APLP2	APLP2				APLP2
APMAP						APMAP
APMAP_ENST00000451442
APOA1	APOA1					APOA1
APOA1BP	APOA1BP
APOA1BP_ENST00000368233	APOA1BP_ENST00000368233
APOA2						APOA2
APOA4	APOA4	APOA4				APOA4
APOA5	APOA5	APOA5				APOA5
APOB	APOB	APOB	APOB			APOB
APOBEC1	APOBEC1					APOBEC1
APOBEC2	APOBEC2					APOBEC2
APOBEC3A
APOBEC3B	APOBEC3B
APOBEC3C						APOBEC3C
APOBEC3D	APOBEC3D					APOBEC3D
APOBEC3D_ENST00000381568	APOBEC3D_ENST00000381568
APOBEC3F	APOBEC3F
APOBEC3F_ENST00000381565
APOBEC3G	APOBEC3G					APOBEC3G
APOBEC3G_ENST00000407997	APOBEC3G_ENST00000407997
APOBEC3H	APOBEC3H					APOBEC3H
APOBEC3H_ENST00000421988
APOBEC4	APOBEC4					APOBEC4
APOBR	APOBR	APOBR				APOBR
APOBR_ENST00000564831	APOBR_ENST00000564831	APOBR_ENST00000564831
APOC1						APOC1
APOC2						APOC2
APOC3						APOC3
APOC4						APOC4
APOD	APOD					APOD
APOE	APOE					APOE
APOF	APOF					APOF
APOH	APOH	APOH				APOH
APOL1	APOL1					APOL1
APOL1_ENST00000438034
APOL1_ENST00000440669
APOL2	APOL2					APOL2
APOL3	APOL3					APOL3
APOL3_ENST00000349314	APOL3_ENST00000349314
APOL4_ENST00000328429
APOL4_ENST00000352371
APOL5	APOL5	APOL5				APOL5
APOL6	APOL6					APOL6
APOLD1						APOLD1
APOLD1_ENST00000326765
APOM						APOM
APOM_ENST00000375918
APOO
APOOL
APOPT1						APOPT1
APP	APP	APP				APP
APPBP2	APPBP2	APPBP2				APPBP2
APPL1	APPL1	APPL1				APPL1
APPL2	APPL2	APPL2				APPL2
APPL2_ENST00000551662
APRT						APRT
APRT_ENST00000378364
APRT_ENST00000426324
APTX	APTX					APTX
APTX_ENST00000379813	APTX_ENST00000379813
AQP1	AQP1					AQP1
AQP1_ENST00000441328	AQP1_ENST00000441328
AQP10	AQP10	AQP10				AQP10
AQP10_ENST00000484864	AQP10_ENST00000484864
AQP11						AQP11
AQP12A	AQP12A
AQP12A_ENST00000429564
AQP12B	AQP12B					AQP12B
AQP2	AQP2					AQP2
AQP3	AQP3					AQP3
AQP4	AQP4					AQP4
AQP5	AQP5					AQP5
AQP6	AQP6					AQP6
AQP7	AQP7	AQP7				AQP7	AQP7
AQP7_ENST00000379503	AQP7_ENST00000379503	AQP7_ENST00000379503
AQP7_ENST00000379507	AQP7_ENST00000379507
AQP7_ENST00000539936	AQP7_ENST00000539936	AQP7_ENST00000539936
AQP7_ENST00000541274	AQP7_ENST00000541274	AQP7_ENST00000541274
AQP8	AQP8	AQP8				AQP8
AQP8_ENST00000219660	AQP8_ENST00000219660	AQP8_ENST00000219660
AQP9	AQP9					AQP9
AQR	AQR	AQR				AQR	AQR
AR	AR	AR	AR
AR_ENST00000396043	AR_ENST00000396043	AR_ENST00000396043
AR_ENST00000544984	AR_ENST00000544984	AR_ENST00000544984	AR_ENST00000544984
ARAF	ARAF	ARAF
ARAP1	ARAP1	ARAP1				ARAP1
ARAP1_ENST00000393609	ARAP1_ENST00000393609	ARAP1_ENST00000393609
ARAP2	ARAP2	ARAP2				ARAP2
ARAP3	ARAP3	ARAP3				ARAP3
ARC	ARC	ARC				ARC
ARCN1	ARCN1					ARCN1	ARCN1
AREG						AREG
ARF1						ARF1
ARF3						ARF3
ARF4						ARF4
ARF5						ARF5
ARF6						ARF6
ARFGAP1	ARFGAP1					ARFGAP1
ARFGAP1_ENST00000370275	ARFGAP1_ENST00000370275
ARFGAP2	ARFGAP2	ARFGAP2				ARFGAP2
ARFGAP3	ARFGAP3					ARFGAP3
ARFGEF1	ARFGEF1	ARFGEF1				ARFGEF1
ARFGEF2	ARFGEF2	ARFGEF2				ARFGEF2
ARFIP1	ARFIP1					ARFIP1
ARFIP1_ENST00000451320	ARFIP1_ENST00000451320
ARFIP2	ARFIP2					ARFIP2
ARFRP1	ARFRP1					ARFRP1
ARFRP1_ENST00000217224
ARG1	ARG1					ARG1
ARG1_ENST00000356962
ARG2	ARG2					ARG2
ARGFX	ARGFX					ARGFX
ARGLU1	ARGLU1					ARGLU1
ARGLU1_ENST00000375926
ARHGAP1	ARHGAP1					ARHGAP1
ARHGAP10	ARHGAP10	ARHGAP10				ARHGAP10
ARHGAP11A	ARHGAP11A	ARHGAP11A
ARHGAP12	ARHGAP12	ARHGAP12				ARHGAP12
ARHGAP12_ENST00000344936	ARHGAP12_ENST00000344936	ARHGAP12_ENST00000344936
ARHGAP15	ARHGAP15	ARHGAP15				ARHGAP15
ARHGAP17	ARHGAP17	ARHGAP17				ARHGAP17
ARHGAP17_ENST00000289968	ARHGAP17_ENST00000289968	ARHGAP17_ENST00000289968
ARHGAP18	ARHGAP18	ARHGAP18				ARHGAP18
ARHGAP19	ARHGAP19					ARHGAP19
ARHGAP19_ENST00000358308	ARHGAP19_ENST00000358308
ARHGAP19_ENST00000358531	ARHGAP19_ENST00000358531
ARHGAP20	ARHGAP20	ARHGAP20				ARHGAP20
ARHGAP20_ENST00000524756	ARHGAP20_ENST00000524756
ARHGAP20_ENST00000529591
ARHGAP20_ENST00000533353	ARHGAP20_ENST00000533353	ARHGAP20_ENST00000533353
ARHGAP21	ARHGAP21	ARHGAP21				ARHGAP21
ARHGAP21_ENST00000320481	ARHGAP21_ENST00000320481	ARHGAP21_ENST00000320481
ARHGAP21_ENST00000376410	ARHGAP21_ENST00000376410	ARHGAP21_ENST00000376410
ARHGAP22	ARHGAP22	ARHGAP22				ARHGAP22
ARHGAP22_ENST00000417247	ARHGAP22_ENST00000417247	ARHGAP22_ENST00000417247
ARHGAP22_ENST00000417912	ARHGAP22_ENST00000417912	ARHGAP22_ENST00000417912
ARHGAP24	ARHGAP24	ARHGAP24				ARHGAP24
ARHGAP24_ENST00000395184	ARHGAP24_ENST00000395184	ARHGAP24_ENST00000395184
ARHGAP25	ARHGAP25	ARHGAP25				ARHGAP25
ARHGAP25_ENST00000409202	ARHGAP25_ENST00000409202	ARHGAP25_ENST00000409202
ARHGAP25_ENST00000497079	ARHGAP25_ENST00000497079	ARHGAP25_ENST00000497079
ARHGAP25_ENST00000544262	ARHGAP25_ENST00000544262
ARHGAP26	ARHGAP26	ARHGAP26				ARHGAP26
ARHGAP27	ARHGAP27	ARHGAP27				ARHGAP27
ARHGAP27_ENST00000428638	ARHGAP27_ENST00000428638	ARHGAP27_ENST00000428638
ARHGAP28	ARHGAP28	ARHGAP28				ARHGAP28
ARHGAP28_ENST00000400091	ARHGAP28_ENST00000400091	ARHGAP28_ENST00000400091
ARHGAP29	ARHGAP29	ARHGAP29				ARHGAP29
ARHGAP29_ENST00000370217	ARHGAP29_ENST00000370217
ARHGAP30	ARHGAP30	ARHGAP30				ARHGAP30
ARHGAP31	ARHGAP31	ARHGAP31				ARHGAP31
ARHGAP32	ARHGAP32	ARHGAP32				ARHGAP32
ARHGAP32_ENST00000310343	ARHGAP32_ENST00000310343	ARHGAP32_ENST00000310343
ARHGAP33	ARHGAP33	ARHGAP33				ARHGAP33
ARHGAP33_ENST00000221905
ARHGAP33_ENST00000378944	ARHGAP33_ENST00000378944	ARHGAP33_ENST00000378944
ARHGAP35	ARHGAP35	ARHGAP35				ARHGAP35
ARHGAP36	ARHGAP36	ARHGAP36
ARHGAP36_ENST00000276211	ARHGAP36_ENST00000276211	ARHGAP36_ENST00000276211
ARHGAP39	ARHGAP39	ARHGAP39				ARHGAP39
ARHGAP4	ARHGAP4	ARHGAP4
ARHGAP4_ENST00000370028	ARHGAP4_ENST00000370028	ARHGAP4_ENST00000370028
ARHGAP40	ARHGAP40
ARHGAP40_ENST00000373345	ARHGAP40_ENST00000373345	ARHGAP40_ENST00000373345
ARHGAP42	ARHGAP42	ARHGAP42
ARHGAP44	ARHGAP44	ARHGAP44				ARHGAP44
ARHGAP5	ARHGAP5	ARHGAP5				ARHGAP5
ARHGAP5_ENST00000396582
ARHGAP6	ARHGAP6	ARHGAP6
ARHGAP6_ENST00000380718	ARHGAP6_ENST00000380718	ARHGAP6_ENST00000380718
ARHGAP6_ENST00000380732	ARHGAP6_ENST00000380732	ARHGAP6_ENST00000380732
ARHGAP6_ENST00000534860	ARHGAP6_ENST00000534860	ARHGAP6_ENST00000534860
ARHGAP8	ARHGAP8	ARHGAP8
ARHGAP9	ARHGAP9	ARHGAP9				ARHGAP9
ARHGDIA	ARHGDIA					ARHGDIA
ARHGDIB	ARHGDIB					ARHGDIB
ARHGDIG						ARHGDIG
ARHGEF1	ARHGEF1	ARHGEF1				ARHGEF1
ARHGEF10_ENST00000398560	ARHGEF10_ENST00000398560	ARHGEF10_ENST00000398560
ARHGEF10_ENST00000398564	ARHGEF10_ENST00000398564	ARHGEF10_ENST00000398564
ARHGEF10L	ARHGEF10L	ARHGEF10L				ARHGEF10L
ARHGEF10L_ENST00000361221	ARHGEF10L_ENST00000361221	ARHGEF10L_ENST00000361221
ARHGEF10L_ENST00000375408	ARHGEF10L_ENST00000375408	ARHGEF10L_ENST00000375408
ARHGEF10L_ENST00000375420	ARHGEF10L_ENST00000375420
ARHGEF11	ARHGEF11	ARHGEF11				ARHGEF11
ARHGEF11_ENST00000315174	ARHGEF11_ENST00000315174	ARHGEF11_ENST00000315174
ARHGEF12	ARHGEF12	ARHGEF12				ARHGEF12
ARHGEF15	ARHGEF15	ARHGEF15				ARHGEF15
ARHGEF16	ARHGEF16	ARHGEF16				ARHGEF16
ARHGEF16_ENST00000378378	ARHGEF16_ENST00000378378	ARHGEF16_ENST00000378378
ARHGEF16_ENST00000413250	ARHGEF16_ENST00000413250	ARHGEF16_ENST00000413250
ARHGEF17	ARHGEF17	ARHGEF17				ARHGEF17
ARHGEF18	ARHGEF18	ARHGEF18				ARHGEF18
ARHGEF18_ENST00000359920	ARHGEF18_ENST00000359920	ARHGEF18_ENST00000359920
ARHGEF19	ARHGEF19	ARHGEF19				ARHGEF19
ARHGEF19_ENST00000449495
ARHGEF2	ARHGEF2	ARHGEF2				ARHGEF2
ARHGEF2_ENST00000361247	ARHGEF2_ENST00000361247	ARHGEF2_ENST00000361247
ARHGEF2_ENST00000368315	ARHGEF2_ENST00000368315	ARHGEF2_ENST00000368315
ARHGEF25	ARHGEF25	ARHGEF25				ARHGEF25
ARHGEF25_ENST00000333972	ARHGEF25_ENST00000333972	ARHGEF25_ENST00000333972
ARHGEF26	ARHGEF26	ARHGEF26				ARHGEF26
ARHGEF26_ENST00000356448	ARHGEF26_ENST00000356448	ARHGEF26_ENST00000356448
ARHGEF26_ENST00000465817	ARHGEF26_ENST00000465817
ARHGEF3	ARHGEF3	ARHGEF3				ARHGEF3
ARHGEF3_ENST00000296315	ARHGEF3_ENST00000296315	ARHGEF3_ENST00000296315
ARHGEF3_ENST00000338458	ARHGEF3_ENST00000338458	ARHGEF3_ENST00000338458
ARHGEF3_ENST00000413728	ARHGEF3_ENST00000413728	ARHGEF3_ENST00000413728
ARHGEF33	ARHGEF33	ARHGEF33				ARHGEF33
ARHGEF33_ENST00000398800	ARHGEF33_ENST00000398800	ARHGEF33_ENST00000398800
ARHGEF35
ARHGEF37	ARHGEF37	ARHGEF37				ARHGEF37
ARHGEF38						ARHGEF38
ARHGEF38_ENST00000420470	ARHGEF38_ENST00000420470
ARHGEF4	ARHGEF4	ARHGEF4				ARHGEF4
ARHGEF4_ENST00000355771	ARHGEF4_ENST00000355771	ARHGEF4_ENST00000355771
ARHGEF4_ENST00000392953	ARHGEF4_ENST00000392953	ARHGEF4_ENST00000392953
ARHGEF40						ARHGEF40
ARHGEF40_ENST00000298694	ARHGEF40_ENST00000298694	ARHGEF40_ENST00000298694
ARHGEF5	ARHGEF5	ARHGEF5				ARHGEF5
ARHGEF6	ARHGEF6	ARHGEF6
ARHGEF7	ARHGEF7	ARHGEF7				ARHGEF7
ARHGEF7_ENST00000375736	ARHGEF7_ENST00000375736	ARHGEF7_ENST00000375736
ARHGEF7_ENST00000375741	ARHGEF7_ENST00000375741	ARHGEF7_ENST00000375741
ARHGEF7_ENST00000544132
ARHGEF9	ARHGEF9	ARHGEF9
ARHGEF9_ENST00000253401	ARHGEF9_ENST00000253401	ARHGEF9_ENST00000253401
ARHGEF9_ENST00000374878	ARHGEF9_ENST00000374878	ARHGEF9_ENST00000374878
ARHGEF9_ENST00000437457	ARHGEF9_ENST00000437457
ARID1A	ARID1A	ARID1A	ARID1A			ARID1A
ARID1B	ARID1B	ARID1B	ARID1B			ARID1B
ARID1B_ENST00000346085	ARID1B_ENST00000346085	ARID1B_ENST00000346085	ARID1B_ENST00000346085
ARID2	ARID2	ARID2	ARID2			ARID2
ARID3A	ARID3A	ARID3A				ARID3A
ARID3B	ARID3B	ARID3B				ARID3B
ARID3C	ARID3C	ARID3C				ARID3C
ARID4A	ARID4A	ARID4A				ARID4A
ARID4A_ENST00000355431	ARID4A_ENST00000355431	ARID4A_ENST00000355431
ARID4B						ARID4B
ARID4B_ENST00000264183	ARID4B_ENST00000264183	ARID4B_ENST00000264183
ARID5A	ARID5A	ARID5A				ARID5A
ARID5B	ARID5B	ARID5B				ARID5B
ARID5B_ENST00000309334	ARID5B_ENST00000309334	ARID5B_ENST00000309334
ARIH1	ARIH1					ARIH1	ARIH1
ARL1_ENST00000261636
ARL10	ARL10					ARL10
ARL11	ARL11					ARL11
ARL13A
ARL13A_ENST00000450049
ARL13B	ARL13B					ARL13B
ARL13B_ENST00000394222	ARL13B_ENST00000394222
ARL14						ARL14
ARL15						ARL15
ARL15_ENST00000504924
ARL16						ARL16
ARL17A
ARL17B
ARL2						ARL2	ARL2
ARL2BP						ARL2BP
ARL3_ENST00000260746
ARL4A						ARL4A
ARL4C						ARL4C
ARL4C_ENST00000339728
ARL4D	ARL4D					ARL4D
ARL4P
ARL5A						ARL5A
ARL5B						ARL5B
ARL5C						ARL5C
ARL6						ARL6
ARL6IP1	ARL6IP1					ARL6IP1
ARL6IP4
ARL6IP4_ENST00000392435
ARL6IP5						ARL6IP5
ARL6IP6						ARL6IP6
ARL8A						ARL8A
ARL8B						ARL8B
ARL8B_ENST00000419534
ARL9						ARL9
ARMC1	ARMC1					ARMC1
ARMC10	ARMC10					ARMC10
ARMC2	ARMC2	ARMC2				ARMC2
ARMC3	ARMC3	ARMC3				ARMC3
ARMC3_ENST00000409049	ARMC3_ENST00000409049	ARMC3_ENST00000409049
ARMC4	ARMC4	ARMC4				ARMC4
ARMC4_ENST00000434029	ARMC4_ENST00000434029	ARMC4_ENST00000434029
ARMC4_ENST00000545014	ARMC4_ENST00000545014	ARMC4_ENST00000545014
ARMC5	ARMC5	ARMC5				ARMC5
ARMC5_ENST00000457010	ARMC5_ENST00000457010	ARMC5_ENST00000457010
ARMC6	ARMC6	ARMC6				ARMC6
ARMC6_ENST00000535612	ARMC6_ENST00000535612	ARMC6_ENST00000535612
ARMC7						ARMC7	ARMC7
ARMC8	ARMC8					ARMC8
ARMC8_ENST00000469044	ARMC8_ENST00000469044
ARMC8_ENST00000481646	ARMC8_ENST00000481646	ARMC8_ENST00000481646
ARMC9	ARMC9	ARMC9				ARMC9
ARMCX1	ARMCX1	ARMCX1
ARMCX2	ARMCX2	ARMCX2
ARMCX3	ARMCX3
ARMCX4
ARMCX5	ARMCX5	ARMCX5
ARMCX6
ARMS2						ARMS2
ARMS2_ENST00000528446
ARNT	ARNT	ARNT				ARNT
ARNT2	ARNT2	ARNT2				ARNT2
ARNTL	ARNTL	ARNTL				ARNTL
ARNTL_ENST00000389708	ARNTL_ENST00000389708	ARNTL_ENST00000389708
ARNTL2	ARNTL2	ARNTL2				ARNTL2
ARPC1A	ARPC1A					ARPC1A
ARPC1A_ENST00000432884	ARPC1A_ENST00000432884
ARPC1B	ARPC1B					ARPC1B
ARPC2	ARPC2					ARPC2
ARPC3						ARPC3
ARPC4
ARPC5						ARPC5
ARPC5_ENST00000294742
ARPC5_ENST00000367534
ARPC5L						ARPC5L
ARPM1	ARPM1
ARPP19						ARPP19
ARPP21	ARPP21	ARPP21				ARPP21
ARPP21_ENST00000428373
ARPP21_ENST00000458225	ARPP21_ENST00000458225	ARPP21_ENST00000458225
ARR3	ARR3
ARRB1	ARRB1	ARRB1				ARRB1
ARRB1_ENST00000393505	ARRB1_ENST00000393505	ARRB1_ENST00000393505
ARRB2	ARRB2					ARRB2
ARRDC1	ARRDC1					ARRDC1
ARRDC1_ENST00000431925
ARRDC2	ARRDC2					ARRDC2
ARRDC2_ENST00000222250	ARRDC2_ENST00000222250
ARRDC3	ARRDC3					ARRDC3
ARRDC4	ARRDC4					ARRDC4
ARRDC5	ARRDC5					ARRDC5
ARSA	ARSA					ARSA
ARSB	ARSB	ARSB				ARSB
ARSB_ENST00000396151	ARSB_ENST00000396151
ARSD	ARSD	ARSD
ARSE	ARSE	ARSE
ARSE_ENST00000540563	ARSE_ENST00000540563	ARSE_ENST00000540563
ARSF	ARSF	ARSF
ARSG	ARSG	ARSG				ARSG
ARSH	ARSH	ARSH
ARSI	ARSI	ARSI				ARSI
ARSJ	ARSJ	ARSJ				ARSJ
ARSK	ARSK					ARSK
ART1	ART1					ART1
ART3	ART3					ART3
ART3_ENST00000355810	ART3_ENST00000355810
ART4	ART4					ART4
ART5	ART5					ART5
ART5_ENST00000397067	ART5_ENST00000397067
ARTN						ARTN
ARV1	ARV1					ARV1
ARVCF	ARVCF	ARVCF				ARVCF
ARX	ARX
AS3MT	AS3MT					AS3MT
ASAH1	ASAH1					ASAH1
ASAH1_ENST00000314146	ASAH1_ENST00000314146
ASAH1_ENST00000381733	ASAH1_ENST00000381733
ASAH2	ASAH2					ASAH2
ASAH2_ENST00000395526	ASAH2_ENST00000395526
ASAH2B
ASAP1	ASAP1	ASAP1				ASAP1
ASAP2	ASAP2	ASAP2				ASAP2
ASAP3	ASAP3	ASAP3				ASAP3
ASAP3_ENST00000437606	ASAP3_ENST00000437606	ASAP3_ENST00000437606
ASB1	ASB1					ASB1
ASB10	ASB10	ASB10				ASB10
ASB10_ENST00000377867	ASB10_ENST00000377867	ASB10_ENST00000377867
ASB10_ENST00000420175	ASB10_ENST00000420175	ASB10_ENST00000420175
ASB10_ENST00000422024	ASB10_ENST00000422024	ASB10_ENST00000422024
ASB11	ASB11
ASB11_ENST00000537676	ASB11_ENST00000537676
ASB12	ASB12
ASB12_ENST00000362002	ASB12_ENST00000362002
ASB13	ASB13					ASB13
ASB14						ASB14
ASB14_ENST00000487349	ASB14_ENST00000487349
ASB15	ASB15					ASB15
ASB15_ENST00000451558	ASB15_ENST00000451558	ASB15_ENST00000451558
ASB16	ASB16					ASB16
ASB17	ASB17	ASB17				ASB17
ASB18						ASB18
ASB18_ENST00000409749	ASB18_ENST00000409749
ASB2	ASB2	ASB2				ASB2
ASB3	ASB3	ASB3
ASB3_ENST00000352846	ASB3_ENST00000352846
ASB4	ASB4	ASB4				ASB4
ASB4_ENST00000428113	ASB4_ENST00000428113
ASB5	ASB5	ASB5				ASB5
ASB6	ASB6					ASB6
ASB7	ASB7					ASB7
ASB8	ASB8					ASB8
ASB9	ASB9
ASB9_ENST00000380488	ASB9_ENST00000380488
ASCC1	ASCC1					ASCC1
ASCC1_ENST00000342444	ASCC1_ENST00000342444
ASCC1_ENST00000545550	ASCC1_ENST00000545550
ASCC2	ASCC2	ASCC2				ASCC2
ASCC3	ASCC3	ASCC3
ASCC3_ENST00000369143
ASCL1	ASCL1					ASCL1
ASCL2						ASCL2
ASCL3						ASCL3
ASCL4	ASCL4					ASCL4
ASCL5						ASCL5
ASF1A						ASF1A
ASF1B	ASF1B					ASF1B
ASGR1						ASGR1
ASGR1_ENST00000380920
ASGR2	ASGR2					ASGR2
ASH1L	ASH1L	ASH1L	ASH1L			ASH1L
ASH2L	ASH2L	ASH2L				ASH2L
ASIC3	ASIC3					ASIC3
ASL	ASL	ASL				ASL
ASMT	ASMT	ASMT
ASMT_ENST00000381241
ASMT_ENST00000432523
ASMTL	ASMTL	ASMTL
ASMTL_ENST00000381317	ASMTL_ENST00000381317	ASMTL_ENST00000381317
ASMTL-AS1
ASNA1	ASNA1					ASNA1
ASNS	ASNS	ASNS				ASNS
ASNS_ENST00000394309	ASNS_ENST00000394309	ASNS_ENST00000394309
ASNSD1	ASNSD1	ASNSD1				ASNSD1
ASPA	ASPA					ASPA
ASPDH						ASPDH
ASPDH_ENST00000389208
ASPG	ASPG	ASPG				ASPG
ASPH	ASPH	ASPH				ASPH
ASPH_ENST00000356457
ASPH_ENST00000379449
ASPH_ENST00000389204
ASPHD1	ASPHD1	ASPHD1				ASPHD1
ASPHD2	ASPHD2					ASPHD2
ASPHD2_ENST00000215906	ASPHD2_ENST00000215906
ASPM	ASPM	ASPM	ASPM			ASPM
ASPN	ASPN
[truncated: 27,334 more rows]

## Sheet: statistics
Dataset	Weghorn and Sunyaev (147 genes)	Zhou et al (112 genes)	Kegel et al (16540 genes)	Kegel_broadly essential (1014 genes)	Zapata et al (25 genes)	Pytnitsky et al (91 genes)
N0	140	103	15070	939	23	91
N50	111	99	12284	687	20	91
N100	71	86	8047	401	16	81
N500	9	15	521	15	2	3
	Weghorn and Sunyaev (147 genes)	Zhou et al (112 genes)	Kegel et al (16540 genes)	Kegel_broadly essential (1014 genes)	Zapata et al (25 genes)	Pytnitsky et al (91 genes)
N0	0.952381	0.919643	0.911125	0.926036	0.92	1
N50	0.755102	0.883929	0.742684	0.677515	0.8	1
N100	0.482993	0.767857	0.486518	0.395464	0.64	0.89011
N500	0.0612245	0.133929	0.0314994	0.0147929	0.08	0.032967
