# Supplementary material for: Use of signals of positive and negative selection to distinguish cancer genes and passenger genes
Source: eLife. 2021 Jan 11;10:e59629. doi: 10.7554/eLife.59629 (PMC7877913; doi:10.7554/eLife.59629)
Supplement: Supplementary file 15. [file elife-59629-supp15.xlsx]

## Sheet: Supplementary file 15
		Number of substitutions
Wild type amino acid	Wild type codon	Missense	Silent	Nonsense	fM	fS	fN			fM	fS	fN
									average	0.714026	0.24408	0.0418944
Ser	TCA	4	3	2	0.444444	0.333333	0.222222		standard deviation	0.115575	0.119704	0.0707512
Leu	TTA	5	2	2	0.555556	0.222222	0.222222
Tyr	TAT	6	1	2	0.666667	0.111111	0.222222
Tyr	TAC	6	1	2	0.666667	0.111111	0.222222
Trp	TGG	7	0	2	0.777778	0	0.222222
Arg	CGA	4	4	1	0.444444	0.444444	0.111111
Ser	TCG	5	3	1	0.555556	0.333333	0.111111
Gly	GGA	5	3	1	0.555556	0.333333	0.111111
Leu	TTG	6	2	1	0.666667	0.222222	0.111111
Arg	AGA	6	2	1	0.666667	0.222222	0.111111
Gln	CAA	7	1	1	0.777778	0.111111	0.111111
Gln	CAG	7	1	1	0.777778	0.111111	0.111111
Lys	AAA	7	1	1	0.777778	0.111111	0.111111
Lys	AAG	7	1	1	0.777778	0.111111	0.111111
Glu	GAA	7	1	1	0.777778	0.111111	0.111111
Glu	GAG	7	1	1	0.777778	0.111111	0.111111
Cys	TGT	7	1	1	0.777778	0.111111	0.111111
Cys	TGC	7	1	1	0.777778	0.111111	0.111111
Leu	CTA	5	4	0	0.555556	0.444444	0
Leu	CTG	5	4	0	0.555556	0.444444	0
Arg	CGG	5	4	0	0.555556	0.444444	0
Leu	CTT	6	3	0	0.666667	0.333333	0
Leu	CTC	6	3	0	0.666667	0.333333	0
Val	GTT	6	3	0	0.666667	0.333333	0
Val	GTC	6	3	0	0.666667	0.333333	0
Val	GTA	6	3	0	0.666667	0.333333	0
Val	GTG	6	3	0	0.666667	0.333333	0
Ser	TCT	6	3	0	0.666667	0.333333	0
Ser	TCC	6	3	0	0.666667	0.333333	0
Pro	CCT	6	3	0	0.666667	0.333333	0
Pro	CCC	6	3	0	0.666667	0.333333	0
Pro	CCA	6	3	0	0.666667	0.333333	0
Pro	CCG	6	3	0	0.666667	0.333333	0
Thr	ACT	6	3	0	0.666667	0.333333	0
Thr	ACC	6	3	0	0.666667	0.333333	0
Thr	ACA	6	3	0	0.666667	0.333333	0
Thr	ACG	6	3	0	0.666667	0.333333	0
Ala	GCT	6	3	0	0.666667	0.333333	0
Ala	GCC	6	3	0	0.666667	0.333333	0
Ala	GCA	6	3	0	0.666667	0.333333	0
Ala	GCG	6	3	0	0.666667	0.333333	0
Arg	CGT	6	3	0	0.666667	0.333333	0
Arg	CGC	6	3	0	0.666667	0.333333	0
Gly	GGT	6	3	0	0.666667	0.333333	0
Gly	GGC	6	3	0	0.666667	0.333333	0
Gly	GGG	6	3	0	0.666667	0.333333	0
Ile	ATT	7	2	0	0.777778	0.222222	0
Ile	ATC	7	2	0	0.777778	0.222222	0
Ile	ATA	7	2	0	0.777778	0.222222	0
Arg	AGG	7	2	0	0.777778	0.222222	0
Phe	TTT	8	1	0	0.888889	0.111111	0
Phe	TTC	8	1	0	0.888889	0.111111	0
Ser	AGT	8	1	0	0.888889	0.111111	0
Ser	AGC	8	1	0	0.888889	0.111111	0
His	CAT	8	1	0	0.888889	0.111111	0
His	CAC	8	1	0	0.888889	0.111111	0
Asn	AAT	8	1	0	0.888889	0.111111	0
Asn	AAC	8	1	0	0.888889	0.111111	0
Asp	GAT	8	1	0	0.888889	0.111111	0
Asp	GAC	8	1	0	0.888889	0.111111	0
Met	ATG	9	0	0	1	0	0
Number of substitutions		392	134	23
Fraction of substitutions		0.714026	0.24408	0.0418944
