# Supplementary material for: Use of signals of positive and negative selection to distinguish cancer genes and passenger genes
Source: eLife. 2021 Jan 11;10:e59629. doi: 10.7554/eLife.59629 (PMC7877913; doi:10.7554/eLife.59629)
Supplement: Supplementary file 17. [file elife-59629-supp17.xlsx]

## Sheet: Supplementary file 17
Gene name (56431)	Number of sense codons	expected fM	expected fS	expected fN			fM	fS	fN
GAGE12B	6	0.72215	0.148133	0.129617		average	0.729753	0.228923	0.0412262
GSTM4_ENST00000638994	11	0.757518	0.202	0.0404		standard deviation	0.0122912	0.017591	0.00823343
CHTF8_ENST00000519520	12	0.740675	0.231458	0.027775
CHTF8_ENST00000520529	12	0.740675	0.231458	0.027775
LST1_ENST00000376096	13	0.743523	0.205108	0.0512769
CCDC38_ENST00000546386	13	0.6837	0.264931	0.0512769
GCHFR_ENST00000558670	13	0.743531	0.213654	0.0427308
ZNF549_ENST00000594943	13	0.717885	0.264931	0.0170923
SLC2A10_ENST00000486000	13	0.6837	0.307662	0.00854615
APEX1_ENST00000557054	14	0.738029	0.230136	0.0317429
MXRA7_ENST00000585519	15	0.770307	0.15554	0.0740667
MXRA7_ENST00000588114	15	0.770307	0.15554	0.0740667
NUDT7_ENST00000563839	15	0.70364	0.24442	0.0518467
ATP5MC2_ENST00000549748	16	0.777719	0.215256	0.00694375
CSRP1_ENST00000526256	17	0.725424	0.2222	0.0522824
USP12_ENST00000620323	18	0.771544	0.191339	0.0370333
FXR1_ENST00000491674	19	0.725079	0.245589	0.0292368
NEDD4L_ENST00000617539	20	0.7166	0.249975	0.03333
OSM_ENST00000403463	20	0.699935	0.272195	0.027775
ANXA8_ENST00000583448	21	0.698348	0.243362	0.0581952
CRBN_ENST00000629101	21	0.677181	0.264524	0.0581952
ZNF569_ENST00000592490	21	0.772419	0.174586	0.0529048
NDUFV2_ENST00000497577	21	0.714219	0.269814	0.0158714
ZNF564_ENST00000416136	21	0.793581	0.195748	0.010581
MXRA7_ENST00000589082	22	0.742359	0.21715	0.0404
RNF165_ENST00000587853	22	0.701955	0.2727	0.02525
RNF165_ENST00000590330	22	0.701955	0.2727	0.02525
AC107959.5	22	0.762555	0.21715	0.0202
STXBP1_ENST00000476182	22	0.707005	0.2727	0.0202
COX7A1_ENST00000437291	23	0.714909	0.246352	0.0386435
ZNF586_ENST00000599802	23	0.714913	0.256013	0.0289826
CRYZL1_ENST00000399442	24	0.731412	0.2222	0.0462917
ACTR3C_ENST00000613959	24	0.7453	0.212942	0.0416625
LAMTOR4_ENST00000488241	24	0.740671	0.217571	0.0416625
MTRNR2L7	24	0.722154	0.236088	0.0416625
C14orf178_ENST00000557011	24	0.749933	0.208313	0.0416625
MTRNR2L11	24	0.731413	0.231458	0.0370333
MTRNR2L12	24	0.708267	0.254604	0.0370333
MTRNR2L13	24	0.7453	0.217571	0.0370333
MTRNR2L8	24	0.708267	0.254604	0.0370333
MTRNR2L1	24	0.708267	0.254604	0.0370333
MTRNR2L3	24	0.717525	0.245346	0.0370333
MTRNR2L5	24	0.731417	0.236088	0.0324042
MTRNR2L6	24	0.708267	0.259233	0.0324042
MTRNR2L10	24	0.717525	0.254604	0.027775
RPL41	25	0.751048	0.186648	0.062216
RPL41_ENST00000501597	25	0.751048	0.186648	0.062216
RPL36A_ENST00000471855	25	0.746596	0.195536	0.057772
ZNF585A_ENST00000588354	25	0.719932	0.2222	0.057772
ZNF772_ENST00000601768	25	0.737712	0.204424	0.057772
ARL15_ENST00000502271	25	0.773264	0.182204	0.04444
HS1BP3_ENST00000631166	25	0.733264	0.24442	0.02222
LINC00672	25	0.737712	0.24442	0.017776
AC119676.1	26	0.764885	0.183742	0.0512769
NAALADL1_ENST00000528884	26	0.747796	0.205108	0.0470038
TBCA_ENST00000520039	26	0.722154	0.230746	0.0470038
GABARAPL1_ENST00000535576	27	0.761244	0.172822	0.065837
GABARAPL1_ENST00000539170	27	0.761244	0.172822	0.065837
GABARAPL1_ENST00000544284	27	0.761244	0.172822	0.065837
GABARAPL1_ENST00000546017	27	0.761244	0.172822	0.065837
GABARAP_ENST00000571129	27	0.765359	0.176937	0.0576074
GABARAP_ENST00000571253	27	0.765359	0.176937	0.0576074
GABARAP_ENST00000577035	27	0.765359	0.176937	0.0576074
BIN3_ENST00000522268	27	0.7489	0.209856	0.0411481
RMI2_ENST00000576027	27	0.707756	0.267463	0.0246889
APOA2_ENST00000491350	27	0.732441	0.242774	0.0246889
SDHAF2_ENST00000542074	28	0.710254	0.2222	0.0674536
MTRNR2L4	28	0.745964	0.198393	0.05555
ZFP1_ENST00000568079	28	0.745964	0.202361	0.0515821
CMTM1_ENST00000533666	28	0.706282	0.246007	0.0476143
C16orf74_ENST00000602914	28	0.741996	0.214264	0.0436464
OSBPL1A_ENST00000638614	28	0.765804	0.194425	0.0396786
ZNF302_ENST00000509528	28	0.79755	0.162682	0.0396786
LST1_ENST00000211921	28	0.702314	0.261879	0.0357107
LST1_ENST00000376090	28	0.702314	0.261879	0.0357107
LST1_ENST00000376099	28	0.702314	0.261879	0.0357107
AC010325.1_ENST00000562076	28	0.765804	0.202361	0.0317429
ZNF530_ENST00000597864	28	0.757871	0.210296	0.0317429
FAM222B_ENST00000577682	28	0.726125	0.246007	0.027775
FAM222B_ENST00000581381	28	0.726125	0.246007	0.027775
FAM222B_ENST00000582059	28	0.726125	0.246007	0.027775
FAM222B_ENST00000582266	28	0.726125	0.246007	0.027775
FAM222B_ENST00000583522	28	0.726125	0.246007	0.027775
FAM222B_ENST00000583953	28	0.726125	0.246007	0.027775
MDH2_ENST00000461263	28	0.71025	0.27775	0.0119036
ZNF540_ENST00000586792	29	0.731734	0.206876	0.0612966
PDE4D_ENST00000515835	29	0.735562	0.210707	0.0536345
SAXO2_ENST00000566205	29	0.727903	0.226031	0.0459724
FIGN_ENST00000409634	29	0.747055	0.210707	0.0421414
C16orf74_ENST00000602675	29	0.747059	0.218369	0.0344793
C16orf74_ENST00000602766	29	0.747059	0.218369	0.0344793
APOC1_ENST00000589781	29	0.716407	0.252848	0.0306483
ZIK1_ENST00000307468	29	0.739403	0.237524	0.0229862
PTAR1_ENST00000472967	29	0.758552	0.2222	0.0191552
SEM1_ENST00000488005	30	0.733263	0.196277	0.0703633
ZNF83_ENST00000598536	30	0.74067	0.19998	0.0592533
GH1_ENST00000617086	30	0.71845	0.225903	0.05555
LMBR1_ENST00000638959	30	0.703633	0.24442	0.0518467
ALG11_ENST00000616513	30	0.7703	0.181463	0.0481433
IGFL4_ENST00000601672	30	0.74067	0.214793	0.04444
RIC8B_ENST00000549643	30	0.736967	0.225903	0.0370333
TPP1_ENST00000528657	30	0.725857	0.240717	0.03333
FAM214A_ENST00000562351	30	0.71475	0.251827	0.03333
HBG1_ENST00000632727	30	0.74808	0.2222	0.0296267
HBG2_ENST00000444587	30	0.74808	0.2222	0.0296267
DNAJC19_ENST00000646965	31	0.731113	0.211448	0.0573419
CHD2_ENST00000629346	31	0.763371	0.186361	0.0501742
ISCA1_ENST00000311534	31	0.781287	0.17561	0.0430065
FMR1_ENST00000621447	31	0.723945	0.232952	0.0430065
VGLL4_ENST00000638314	31	0.720361	0.240119	0.0394226
TRPM4_ENST00000599628	31	0.759784	0.200697	0.0394226
SNX5_ENST00000481323	31	0.734697	0.229368	0.0358387
SNX5_ENST00000486039	31	0.734697	0.229368	0.0358387
SLN	31	0.738284	0.229368	0.0322548
SLN_ENST00000305991	31	0.738284	0.229368	0.0322548
SLN_ENST00000525934	31	0.738284	0.229368	0.0322548
AL163636.2	31	0.706029	0.279542	0.0143355
POLD4_ENST00000529704	32	0.729097	0.2222	0.0486063
POLD4_ENST00000530584	32	0.729097	0.2222	0.0486063
POLD4_ENST00000531239	32	0.729097	0.2222	0.0486063
POLD4_ENST00000532830	32	0.729097	0.2222	0.0486063
KLK8_ENST00000320838	32	0.690909	0.267334	0.0416625
KLK8_ENST00000593490	32	0.690909	0.267334	0.0416625
ZNF584_ENST00000596281	32	0.760353	0.197897	0.0416625
KRT8_ENST00000619952	32	0.711737	0.249975	0.0381906
MRPL51_ENST00000543703	32	0.763819	0.197897	0.0381906
TLR4_ENST00000472304	32	0.725631	0.243031	0.0312469
PEX11A_ENST00000559170	32	0.742984	0.225672	0.0312469
AL929554.1	32	0.683962	0.295109	0.0208313
MNT_ENST00000575394	33	0.723836	0.218833	0.0572333
POLR1D_ENST00000630983	33	0.740676	0.205367	0.0538667
PQLC2L_ENST00000468043	33	0.737303	0.2121	0.0505
TSHZ3_ENST00000558569	33	0.744036	0.215467	0.0404
LYRM1_ENST00000412082	33	0.696903	0.2626	0.0404
LYRM1_ENST00000562740	33	0.696903	0.2626	0.0404
C5orf58_ENST00000517575	33	0.76087	0.202	0.0370333
C5orf58_ENST00000524171	33	0.76087	0.202	0.0370333
DMKN_ENST00000461300	33	0.794536	0.1717	0.0336667
DMKN_ENST00000474928	33	0.794536	0.1717	0.0336667
UBL4A_ENST00000630530	33	0.713739	0.2525	0.0336667
ZNF865_ENST00000630143	33	0.700267	0.269333	0.0303
AC022506.1	34	0.774438	0.160115	0.0653529
TRDV1	34	0.705812	0.228735	0.0653529
AC108488.2	34	0.728691	0.212397	0.0588176
ZNF347_ENST00000601804	34	0.741759	0.202594	0.05555
PARVG_ENST00000466375	34	0.709082	0.235271	0.05555
FAM19A2_ENST00000550003	34	0.731956	0.218932	0.0490147
ACTR3_ENST00000415792	34	0.699279	0.254876	0.0457471
SALL1_ENST00000566102	34	0.722153	0.238538	0.0392118
TMEM199_ENST00000395404	34	0.682947	0.287553	0.0294088
SYNPR_ENST00000450542	34	0.699279	0.281018	0.0196059
PFDN1_ENST00000510217	35	0.711043	0.225374	0.0634857
CDKN3_ENST00000620759	35	0.730086	0.206329	0.0634857
NREP_ENST00000509979	35	0.75866	0.180934	0.0603114
NREP_ENST00000515855	35	0.75866	0.180934	0.0603114
LSM7_ENST00000585409	35	0.752309	0.190457	0.0571371
CACNA1A_ENST00000592864	35	0.726917	0.225374	0.0476143
HEXB_ENST00000509579	35	0.755489	0.19998	0.04444
SPI1_ENST00000533030	35	0.720569	0.234897	0.04444
AC244517.10	35	0.6793	0.282511	0.0380914
AMN1_ENST00000542781	35	0.720566	0.241246	0.0380914
SMIM27_ENST00000451672	35	0.70152	0.263466	0.0349171
OTX2_ENST00000554559	35	0.723749	0.24442	0.0317429
OTX2_ENST00000554788	35	0.723749	0.24442	0.0317429
NQO2_ENST00000606474	35	0.72374	0.24442	0.0317429
DWORF	35	0.723743	0.247594	0.0285686
LST1_ENST00000376092	35	0.691997	0.279337	0.0285686
TMEM107_ENST00000449985	35	0.695171	0.279337	0.0253943
LHX6_ENST00000464484	35	0.70152	0.279337	0.0190457
KLHL21_ENST00000610898	35	0.745963	0.234897	0.0190457
NOP10_ENST00000557912	36	0.706725	0.2222	0.0709806
AL162231.1_ENST00000416454	36	0.740675	0.191339	0.0678944
AL162231.1_ENST00000423809	36	0.740675	0.191339	0.0678944
GABARAPL1_ENST00000545047	36	0.746842	0.191339	0.0617222
ALG11_ENST00000523764	36	0.743756	0.197511	0.0586361
PCDHB2_ENST00000625033	36	0.703636	0.240717	0.05555
WWOX_ENST00000569818	36	0.728325	0.219114	0.0524639
NELFE_ENST00000625905	36	0.749931	0.203683	0.0462917
SLC4A1_ENST00000631130	36	0.719067	0.234544	0.0462917
UBL5_ENST00000593087	36	0.731417	0.225286	0.0432056
CNR1_ENST00000362094	36	0.728325	0.231458	0.0401194
BCAS3_ENST00000639611	36	0.712897	0.246889	0.0401194
AC010325.1	36	0.737586	0.228372	0.0339472
MNX1_ENST00000469500	36	0.706722	0.259233	0.0339472
PTPRC_ENST00000367364	36	0.740672	0.228372	0.0308611
PEX13_ENST00000401576	36	0.694378	0.274664	0.0308611
ILK_ENST00000627400	36	0.753014	0.219114	0.027775
GLOD4_ENST00000625892	36	0.722156	0.253061	0.0246889
GLOD4_ENST00000628529	36	0.719069	0.256147	0.0246889
MRPL34_ENST00000602206	36	0.700553	0.274664	0.0246889
C1orf105_ENST00000460397	37	0.744676	0.183165	0.0720649
AFMID_ENST00000586731	37	0.699632	0.228205	0.0720649
ETFRF1_ENST00000553788	37	0.735668	0.204184	0.0600541
SMIM4_ENST00000307106	37	0.7657	0.177159	0.0570514
CAPZA2_ENST00000639546	37	0.750678	0.192173	0.0570514
CSTL1_ENST00000619238	37	0.753684	0.192173	0.0540486
ZNF546_ENST00000596894	37	0.74167	0.204184	0.0540486
C14orf178_ENST00000556047	37	0.741673	0.207186	0.0510459
NREP_ENST00000509025	37	0.747681	0.201181	0.0510459
ACYP1_ENST00000553302	37	0.729659	0.2222	0.0480432
SMIM1_ENST00000561886	37	0.750678	0.207186	0.0420378
UBE3D_ENST00000626828	37	0.693627	0.264238	0.0420378
NCAPD3_ENST00000526422	37	0.708641	0.249224	0.0420378
G3BP1_ENST00000627077	37	0.726662	0.234211	0.0390351
ZNF696_ENST00000521537	37	0.729662	0.231208	0.0390351
PFDN5_ENST00000628881	37	0.73867	0.2222	0.0390351
OST4	37	0.741673	0.225203	0.0330297
OST4_ENST00000429985	37	0.741673	0.225203	0.0330297
OST4_ENST00000447619	37	0.741673	0.225203	0.0330297
FAM174B_ENST00000553393	37	0.729668	0.237214	0.0330297
CHAC1_ENST00000487220	37	0.729662	0.240216	0.030027
HSPB1_ENST00000429938	37	0.717649	0.252227	0.030027
PRR29_ENST00000580752	37	0.729659	0.240216	0.030027
AL035425.2	37	0.765692	0.204184	0.030027
ZNF227_ENST00000589707	37	0.747676	0.225203	0.0270243
CD24_ENST00000620405	37	0.717657	0.258232	0.0240216
IDH3A_ENST00000629769	37	0.732665	0.246222	0.0210189
CHRNB1_ENST00000575379	37	0.738668	0.246222	0.0150135
YWHAE_ENST00000573026	38	0.745542	0.192963	0.0613974
MRPS36_ENST00000512880	38	0.736774	0.204658	0.0584737
MRPS36_ENST00000602380	38	0.736774	0.204658	0.0584737
FANCD2_ENST00000625535	38	0.722155	0.225124	0.0526263
SMIM18_ENST00000626298	38	0.730924	0.216353	0.0526263
ETFRF1_ENST00000555711	38	0.725076	0.2222	0.0526263
TRA2B_ENST00000342294	38	0.766008	0.181268	0.0526263
MBD5_ENST00000637159	38	0.722153	0.228047	0.0497026
ADAM10_ENST00000561288	38	0.701692	0.248513	0.0497026
PPP2R1A_ENST00000628959	38	0.728	0.2222	0.0497026
ZNF772_ENST00000600175	38	0.7397	0.210505	0.0497026
C19orf84_ENST00000570516	38	0.692916	0.260208	0.0467789
C4orf19_ENST00000508175	38	0.730924	0.228047	0.0409316
GMFB_ENST00000554908	38	0.754313	0.207582	0.0380079
GMFB_ENST00000628554	38	0.754313	0.207582	0.0380079
PDLIM5_ENST00000504489	38	0.739697	0.225124	0.0350842
SFTPA2_ENST00000640627	38	0.707539	0.257284	0.0350842
LRRTM2_ENST00000518785	38	0.698763	0.271903	0.0292368
PCDHB2_ENST00000622947	39	0.720728	0.219351	0.0598231
ZSCAN18_ENST00000595944	39	0.720731	0.2222	0.0569744
TNFAIP8_ENST00000415806	39	0.746367	0.19941	0.0541256
MT1E_ENST00000568293	39	0.740669	0.205108	0.0541256
MT1G_ENST00000569500	39	0.743518	0.202259	0.0541256
PDAP1_ENST00000626285	39	0.732123	0.216503	0.0512769
AC093512.2_ENST00000575627	39	0.754913	0.196562	0.0484282
CR2_ENST00000640301	39	0.740669	0.213654	0.0455795
COMMD6_ENST00000626103	39	0.729274	0.225049	0.0455795
PSME2_ENST00000630027	39	0.752064	0.205108	0.0427308
IFI27L1_ENST00000554544	39	0.692241	0.267779	0.0398821
MOSPD2_ENST00000497603	39	0.734972	0.225049	0.0398821
NT5C_ENST00000578337	39	0.723577	0.239292	0.0370333
CYP3A5_ENST00000339843	39	0.712185	0.250687	0.0370333
ZNF568_ENST00000586353	39	0.720733	0.242141	0.0370333
MVP_ENST00000629059	39	0.746367	0.2222	0.0313359
CLDN6_ENST00000572154	39	0.689397	0.282023	0.0284872
RUVBL2_ENST00000639391	39	0.729274	0.242141	0.0284872
LCMT2_ENST00000567039	39	0.712182	0.262082	0.0256385
ZNF814_ENST00000595295	39	0.703638	0.270628	0.0256385
PDCD6_ENST00000628729	39	0.720728	0.256385	0.0227897
RNF146_ENST00000356799	40	0.72771	0.202758	0.0694375
RNF146_ENST00000476956	40	0.72771	0.202758	0.0694375
AC008162.2	40	0.75548	0.180538	0.0638825
MAP3K13_ENST00000438798	40	0.744372	0.194425	0.061105
MAP3K13_ENST00000448876	40	0.744372	0.194425	0.061105
MAP3K13_ENST00000454237	40	0.744372	0.194425	0.061105
ZNF431_ENST00000594425	40	0.722152	0.2222	0.05555
SPTY2D1OS_ENST00000542172	40	0.730492	0.216645	0.0527725
SPTY2D1OS_ENST00000636011	40	0.730492	0.216645	0.0527725
TMEM87A_ENST00000568432	40	0.74993	0.197203	0.0527725
GHRL_ENST00000446937	40	0.70271	0.247198	0.049995
PCNP_ENST00000627393	40	0.711042	0.238865	0.049995
KIAA1191_ENST00000533553	40	0.733262	0.219423	0.0472175
PDCD5_ENST00000379316	40	0.738817	0.213868	0.0472175
DYNLRB2_ENST00000568035	40	0.74993	0.202758	0.0472175
HNRNPH1_ENST00000630639	40	0.72771	0.230532	0.0416625
LYRM4_ENST00000468929	40	0.72771	0.230533	0.0416625
CDK4_ENST00000549606	40	0.722155	0.236088	0.0416625
WARS_ENST00000627608	40	0.727707	0.236088	0.0361075
PRPS1_ENST00000646815	40	0.755482	0.21109	0.03333
WDR3_ENST00000369441	40	0.733262	0.23331	0.03333
ACYP2_ENST00000606082	40	0.752707	0.216645	0.0305525
TMEM272_ENST00000627246	40	0.727707	0.241643	0.0305525
H2AFV_ENST00000521529	40	0.719375	0.252753	0.027775
DDX3X_ENST00000643821	40	0.755485	0.216645	0.027775
FSTL3_ENST00000588773	40	0.730485	0.241643	0.027775
FSTL3_ENST00000592947	40	0.730485	0.241643	0.027775
FSTL3_ENST00000605925	40	0.730485	0.241643	0.027775
MARCH2_ENST00000601283	40	0.716597	0.25553	0.027775
ETFRF1_ENST00000554266	41	0.75061	0.184263	0.0650341
ETFRF1_ENST00000556402	41	0.75061	0.184263	0.0650341
IST1_ENST00000626438	41	0.718088	0.21949	0.0623244
HTN3_ENST00000381057	41	0.734351	0.205941	0.0596146
HMHB1	41	0.720795	0.21949	0.0596146
HMHB1_ENST00000638299	41	0.720795	0.21949	0.0596146
NDUFB2_ENST00000460088	41	0.758734	0.181554	0.0596146
NDUFB2_ENST00000472695	41	0.758734	0.181554	0.0596146
NDUFB2_ENST00000476470	41	0.758734	0.181554	0.0596146
NDUFB2_ENST00000482954	41	0.758734	0.181554	0.0596146
CYP19A1_ENST00000613097	41	0.747893	0.192393	0.0596146
PROCA1_ENST00000581289	41	0.726217	0.21678	0.0569049
TSPAN11_ENST00000545802	41	0.777702	0.168005	0.0541951
IQSEC2_ENST00000485377	41	0.766863	0.181554	0.0514854
MIF4GD_ENST00000578305	41	0.739766	0.214071	0.0460659
MPP6_ENST00000625307	41	0.7208	0.235749	0.0433561
NKIRAS2_ENST00000462043	41	0.723507	0.233039	0.0433561
MTUS1_ENST00000519066	41	0.712668	0.246588	0.0406463
NSRP1_ENST00000479218	41	0.747895	0.211361	0.0406463
ULK3_ENST00000631115	41	0.720798	0.238459	0.0406463
PTPA_ENST00000436883	41	0.750607	0.211361	0.0379366
SAXO2_ENST00000566861	41	0.756027	0.208651	0.0352268
LY6E_ENST00000521182	41	0.69099	0.273685	0.0352268
LY6E_ENST00000522528	41	0.69099	0.273685	0.0352268
UBA3_ENST00000631029	41	0.701829	0.265556	0.0325171
NDUFA3_ENST00000303553	41	0.750607	0.21678	0.0325171
CRX_ENST00000613299	41	0.747902	0.21949	0.0325171
LAMTOR4_ENST00000468582	41	0.709959	0.260137	0.0298073
LAMTOR4_ENST00000473459	41	0.709959	0.260137	0.0298073
MFSD11_ENST00000590393	41	0.75332	0.21678	0.0298073
MFSD11_ENST00000591864	41	0.75332	0.21678	0.0298073
RNF146_ENST00000477776	42	0.73009	0.195748	0.0740667
RNF146_ENST00000480444	42	0.73009	0.195748	0.0740667
RNF146_ENST00000609447	42	0.73009	0.195748	0.0740667
NAF1_ENST00000509434	42	0.751255	0.185167	0.0634857
FMN2_ENST00000543681	42	0.738026	0.198393	0.0634857
GABARAPL2_ENST00000563744	42	0.727445	0.208974	0.0634857
POLR1D_ENST00000489647	42	0.738029	0.201038	0.0608405
ZNHIT3_ENST00000619730	42	0.756545	0.187812	0.05555
SEC61B_ENST00000498603	42	0.724802	0.230136	0.044969
POC1B-GALNT4_ENST00000547474	42	0.732733	0.224845	0.0423238
CDK10_ENST00000625631	42	0.740671	0.219555	0.0396786
SERF2_ENST00000409291	42	0.732733	0.22749	0.0396786
SSH2_ENST00000579954	42	0.70099	0.259233	0.0396786
ZNF772_ENST00000425074	42	0.745969	0.214264	0.0396786
GOLT1B_ENST00000631252	42	0.732738	0.230136	0.0370333
AK2_ENST00000626911	42	0.703636	0.259233	0.0370333
SPATA33_ENST00000568929	42	0.730088	0.238071	0.0317429
PLS3_ENST00000626746	42	0.756543	0.211619	0.0317429
GOSR2_ENST00000638892	42	0.738033	0.232781	0.0290976
GREM1_ENST00000560677	42	0.700993	0.269814	0.0290976
ZNF784_ENST00000591479	42	0.679829	0.290976	0.0290976
PDLIM3_ENST00000629667	42	0.727445	0.246007	0.0264524
SMAGP_ENST00000603838	42	0.708929	0.264524	0.0264524
SMAGP_ENST00000604188	42	0.708929	0.264524	0.0264524
PFKL_ENST00000628044	42	0.687764	0.290976	0.0211619
PRMT5_ENST00000627278	42	0.7248	0.264524	0.010581
GABARAPL1_ENST00000629504	43	0.731195	0.204114	0.064593
TTC39C_ENST00000577185	43	0.718277	0.2222	0.0594256
GIMAP2_ENST00000474605	43	0.726028	0.217033	0.0568419
SLC2A1_ENST00000460369	43	0.728612	0.219616	0.0516744
ODF1_ENST00000518835	43	0.76737	0.183444	0.0490907
BNC2_ENST00000471301	43	0.744114	0.209281	0.046507
MED31_ENST00000575197	43	0.736365	0.217033	0.046507
KRAS_ENST00000556131	43	0.738949	0.217033	0.0439233
TJAP1_ENST00000612912	43	0.720863	0.237702	0.0413395
AC243547.3	43	0.707942	0.255788	0.0361721
C8orf59_ENST00000321777	43	0.7622	0.20153	0.0361721
TMBIM4_ENST00000535812	43	0.75187	0.214449	0.0335884
DEFB119_ENST00000339144	43	0.710528	0.258372	0.0310047
NRDE2_ENST00000628832	43	0.738949	0.24287	0.018086
MDFIC_ENST00000423503	43	0.697607	0.286793	0.0155023
MDFIC_ENST00000448022	43	0.697607	0.286793	0.0155023
PGRMC2_ENST00000394276	44	0.75498	0.1717	0.073225
PGRMC2_ENST00000503872	44	0.75498	0.1717	0.073225
PGRMC2_ENST00000512483	44	0.75498	0.1717	0.073225
KRTAP20-3	44	0.719627	0.20705	0.073225
OCLM	44	0.72973	0.199475	0.0707
CSTF3_ENST00000431742	44	0.724677	0.20705	0.068175
VPS13D_ENST00000543766	44	0.72973	0.204525	0.06565
ATP2A2_ENST00000552636	44	0.744884	0.189375	0.06565
SNAP23_ENST00000627440	44	0.734782	0.20705	0.058075
CDKL3_ENST00000521755	44	0.752455	0.1919	0.05555
SNRPD1_ENST00000579618	44	0.747407	0.19695	0.05555
TMSB4X	44	0.752455	0.1919	0.05555
TMSB4X_ENST00000380633	44	0.752455	0.1919	0.05555
TMSB4X_ENST00000380635	44	0.752455	0.1919	0.05555
TMSB4X_ENST00000451311	44	0.752455	0.1919	0.05555
ZNF573_ENST00000585724	44	0.74993	0.194425	0.05555
NT5C2_ENST00000470299	44	0.724682	0.2222	0.053025
MT1F_ENST00000568475	44	0.74993	0.19695	0.053025
PET100_ENST00000456958	44	0.732252	0.214625	0.053025
TMSB4Y	44	0.752455	0.194425	0.053025
AC009779.3_ENST00000549424	44	0.75498	0.194425	0.0505
MGAT4A_ENST00000495056	44	0.73983	0.2121	0.047975
ANAPC11_ENST00000577425	44	0.76508	0.18685	0.047975
ANAPC11_ENST00000578544	44	0.76508	0.18685	0.047975
ANAPC11_ENST00000579133	44	0.76508	0.18685	0.047975
ANAPC11_ENST00000582222	44	0.76508	0.18685	0.047975
ANAPC11_ENST00000584314	44	0.76508	0.18685	0.047975
YPEL1_ENST00000403503	44	0.74488	0.20705	0.047975
CTNNA2_ENST00000409266	44	0.714577	0.239875	0.04545
TMSB10	44	0.76003	0.19695	0.042925
PTP4A1_ENST00000578299	44	0.767607	0.189375	0.042925
LSM1_ENST00000520755	44	0.73983	0.21715	0.042925
GCHFR_ENST00000561160	44	0.732259	0.224725	0.042925
KRTAP20-4	44	0.70953	0.24745	0.042925
LST1_ENST00000396101	44	0.691852	0.270175	0.037875
NAT14_ENST00000587400	44	0.712055	0.249975	0.037875
CCT5_ENST00000625723	44	0.737307	0.22725	0.03535
PYM1_ENST00000557259	44	0.73478	0.234825	0.0303
KCNC3_ENST00000474951	44	0.714577	0.25755	0.027775
RPL15_ENST00000436146	44	0.714577	0.25755	0.027775
RPL15_ENST00000644684	44	0.714577	0.25755	0.027775
DIABLO_ENST00000475784	44	0.679227	0.295425	0.02525
DIABLO_ENST00000645606	44	0.679227	0.295425	0.02525
AC007846.2	44	0.701955	0.2727	0.02525
ESR1_ENST00000638569	44	0.73225	0.244925	0.022725
MRPL43_ENST00000477279	44	0.724677	0.255025	0.0202
KRTAP22-2	45	0.730793	0.195042	0.0740667
TMSB15A	45	0.740669	0.192573	0.06666
TMSB15B_ENST00000419165	45	0.740669	0.192573	0.06666
TMSB15B_ENST00000540220	45	0.740669	0.192573	0.06666
TMSB15B_ENST00000569577	45	0.740669	0.192573	0.06666
SERF2_ENST00000402131	45	0.753016	0.187636	0.0592533
SERF2_ENST00000403425	45	0.753016	0.187636	0.0592533
SERF2_ENST00000409614	45	0.753016	0.187636	0.0592533
AC092442.1	45	0.745609	0.197511	0.0567844
CHD2_ENST00000627622	45	0.753016	0.192573	0.0543156
TMSB15B_ENST00000563257	45	0.753013	0.192573	0.0543156
PFN2_ENST00000461930	45	0.748078	0.202449	0.0493778
WWOX_ENST00000627394	45	0.730796	0.2222	0.0469089
TBCB_ENST00000629269	45	0.725856	0.227138	0.0469089
ZNF730_ENST00000593635	45	0.735733	0.217262	0.0469089
TCEA1_ENST00000638322	45	0.743144	0.212324	0.04444
NR1H4_ENST00000546380	45	0.740673	0.214793	0.04444
RNF34_ENST00000555076	45	0.735738	0.219731	0.04444
ASNSD1_ENST00000607535	45	0.740671	0.214793	0.04444
IDH3A_ENST00000561366	45	0.728329	0.229607	0.0419711
CARS_ENST00000639317	45	0.7382	0.2222	0.0395022
TNIK_ENST00000465393	45	0.733264	0.227138	0.0395022
EEF1AKMT3_ENST00000551420	45	0.76042	0.202449	0.0370333
TSPAN3_ENST00000558745	45	0.723391	0.239482	0.0370333
TSPAN3_ENST00000561277	45	0.723391	0.239482	0.0370333
NLRP2B	45	0.728324	0.237013	0.0345644
PPP1R14B_ENST00000392210	45	0.735733	0.229607	0.0345644
PYM1_ENST00000547925	45	0.7382	0.229607	0.0320956
TLE6_ENST00000482627	45	0.725856	0.241951	0.0320956
LRWD1_ENST00000626402	45	0.696231	0.276516	0.0271578
R3HDM4_ENST00000626716	45	0.6987	0.274047	0.0271578
TMEM218_ENST00000529609	45	0.683884	0.293798	0.02222
TMEM218_ENST00000532156	45	0.683884	0.293798	0.02222
BLOC1S6_ENST00000564765	46	0.746307	0.181141	0.0724565
VPS35_ENST00000640313	46	0.736643	0.205293	0.0579652
AC244517.6	46	0.775289	0.16665	0.0579652
C12orf75_ENST00000552457	46	0.726987	0.214954	0.0579652
MORN4_ENST00000370635	46	0.741478	0.202878	0.05555
C12orf49_ENST00000548356	46	0.739059	0.207709	0.0531348
HKR1_ENST00000591134	46	0.710076	0.236691	0.0531348
POLR1D_ENST00000636817	46	0.765639	0.183557	0.0507196
MORN2_ENST00000409077	46	0.743893	0.207709	0.0483043
AC118470.1	46	0.719739	0.234276	0.0458891
CRP_ENST00000437342	46	0.729398	0.224615	0.0458891
SETD7_ENST00000608958	46	0.734233	0.219785	0.0458891
CHCHD7_ENST00000523061	46	0.731813	0.2222	0.0458891
RPS20_ENST00000519606	46	0.741474	0.212539	0.0458891
MT1X_ENST00000562939	46	0.746304	0.210124	0.0434739
ZNF763_ENST00000592625	46	0.73423	0.2222	0.0434739
GNGT1_ENST00000428834	46	0.763217	0.195633	0.0410587
GNGT1_ENST00000430875	46	0.763217	0.195633	0.0410587
GNGT1_ENST00000455502	46	0.763217	0.195633	0.0410587
SKA2_ENST00000580541	46	0.712491	0.246352	0.0410587
ZNF134_ENST00000600344	46	0.712491	0.246352	0.0410587
RALB_ENST00000631312	46	0.751139	0.210124	0.0386435
AIF1L_ENST00000372297	46	0.770467	0.190802	0.0386435
MRLN_ENST00000414264	46	0.726983	0.234276	0.0386435
MRLN_ENST00000430431	46	0.726983	0.234276	0.0386435
FAM104B_ENST00000472571	46	0.763213	0.198048	0.0386435
DPH5_ENST00000427040	46	0.755972	0.207709	0.0362283
LDHA_ENST00000625635	46	0.72457	0.239107	0.0362283
NEK3_ENST00000629912	46	0.77288	0.190802	0.0362283
DUSP22_ENST00000605035	46	0.755965	0.210124	0.033813
DUSP22_ENST00000605863	46	0.755965	0.210124	0.033813
MGST1_ENST00000540056	46	0.760807	0.205293	0.033813
RGMA_ENST00000557420	46	0.712493	0.253598	0.033813
C12orf73_ENST00000546540	46	0.719743	0.248767	0.0313978
RNASEK_ENST00000552842	46	0.7294	0.239107	0.0313978
MAP2K3_ENST00000627447	46	0.748726	0.2222	0.0289826
ARSK_ENST00000504763	46	0.695585	0.28258	0.021737
AC026461.4	46	0.724567	0.253598	0.021737
AC010646.1	46	0.698	0.28258	0.0193217
PPP2CB_ENST00000518564	47	0.746972	0.189106	0.0638234
SPINK14_ENST00000562793	47	0.711515	0.226928	0.0614596
DYNLL1_ENST00000552870	47	0.756432	0.19147	0.0520043
DYNLRB1_ENST00000300469	47	0.718606	0.229291	0.0520043
PRPSAP2_ENST00000628609	47	0.723338	0.226928	0.0496404
AK6_ENST00000502819	47	0.692606	0.260021	0.0472766
PDLIM5_ENST00000512274	47	0.735155	0.217472	0.0472766
HSPE1_ENST00000409729	47	0.730426	0.224564	0.0449128
AIG1_ENST00000367596	47	0.723338	0.231655	0.0449128
AC008878.1	47	0.699698	0.255294	0.0449128
HIVEP1_ENST00000484210	47	0.716243	0.241111	0.0425489
STMP1	47	0.739883	0.217472	0.0425489
TCEA1_ENST00000640873	47	0.7588	0.198562	0.0425489
SCYGR10	47	0.716243	0.248202	0.0354574
APOC2_ENST00000592257	47	0.694968	0.269477	0.0354574
MOK_ENST00000561150	47	0.732794	0.234019	0.0330936
FBXL12_ENST00000588922	47	0.680785	0.286023	0.0330936
CCL7_ENST00000394630	47	0.697332	0.27184	0.0307298
C1orf122_ENST00000373043	47	0.687877	0.281296	0.0307298
C1orf122_ENST00000468084	47	0.687877	0.281296	0.0307298
MYL6_ENST00000549017	47	0.749343	0.219836	0.0307298
CCL4L2_ENST00000620055	47	0.709153	0.267113	0.0236383
C11orf95_ENST00000546282	47	0.706787	0.27184	0.0212745
ZNF706_ENST00000519744	48	0.73141	0.201369	0.0671229
KRTAP22-1	48	0.740669	0.19211	0.0671229
SERF1A_ENST00000507348	48	0.770763	0.16665	0.0624937
NAA60_ENST00000615865	48	0.715208	0.226829	0.0578646
CIP2A_ENST00000625495	48	0.715208	0.226829	0.0578646
UGP2_ENST00000627474	48	0.71984	0.229144	0.0509208
METAP1_ENST00000625963	48	0.729096	0.219885	0.0509208
ZNF611_ENST00000596702	48	0.722154	0.226829	0.0509208
AHI1_ENST00000528103	48	0.749929	0.201369	0.0486063
AHI1_ENST00000534469	48	0.749929	0.201369	0.0486063
LBH_ENST00000404397	48	0.761508	0.194425	0.0439771
C5orf58_ENST00000518395	48	0.747615	0.208313	0.0439771
SCGB3A2_ENST00000504320	48	0.699006	0.259233	0.0416625
SSH2_ENST00000582084	48	0.682804	0.275435	0.0416625
SSH2_ENST00000590153	48	0.682804	0.275435	0.0416625
ZNF493_ENST00000599461	48	0.694379	0.263863	0.0416625
USP6NL_ENST00000609853	48	0.712894	0.24766	0.0393479
C12orf75_ENST00000549893	48	0.733727	0.226829	0.0393479
SMIM20_ENST00000514384	48	0.724469	0.238402	0.0370333
TUNAR	48	0.7453	0.217571	0.0370333
TUNAR_ENST00000554321	48	0.7453	0.217571	0.0370333
TIMM8A_ENST00000480575	48	0.738356	0.224515	0.0370333
TIMM8A_ENST00000644112	48	0.738356	0.224515	0.0370333
CEMP1_ENST00000565480	48	0.703635	0.263862	0.0324042
MRPL28_ENST00000429738	48	0.708265	0.261548	0.0300896
FDX2_ENST00000492239	48	0.726783	0.243031	0.0300896
FDX2_ENST00000494368	48	0.726783	0.243031	0.0300896
CENPS_ENST00000462462	49	0.748231	0.194992	0.0566837
CENPS-CORT_ENST00000465026	49	0.748231	0.194992	0.0566837
FAM19A2_ENST00000551449	49	0.734622	0.210863	0.0544163
DDX41_ENST00000625286	49	0.70288	0.247141	0.0498816
HLA-B_ENST00000640094	49	0.714214	0.235804	0.0498816
NAA30_ENST00000554703	49	0.757302	0.194992	0.0476143
NKAIN2_ENST00000546092	49	0.725551	0.229002	0.0453469
CNP_ENST00000472031	49	0.732359	0.2222	0.0453469
WDR78_ENST00000488333	49	0.727822	0.229002	0.0430796
SCGN_ENST00000334979	49	0.743692	0.213131	0.0430796
SCGN_ENST00000612225	49	0.743692	0.213131	0.0430796
ATP5MF_ENST00000488775	49	0.736892	0.219933	0.0430796
MDM2_ENST00000478070	49	0.725555	0.235804	0.0385449
C12orf76_ENST00000546651	49	0.696078	0.269814	0.0340102
SMIM7_ENST00000597711	49	0.727822	0.238071	0.0340102
DCTPP1_ENST00000565758	49	0.716484	0.251676	0.0317429
DCTPP1_ENST00000568434	49	0.716484	0.251676	0.0317429
DCTPP1_ENST00000568973	49	0.716484	0.251676	0.0317429
ATP7A_ENST00000642651	49	0.764104	0.204061	0.0317429
ATP7A_ENST00000645454	49	0.764104	0.204061	0.0317429
LSM7_ENST00000587502	49	0.734624	0.233537	0.0317429
GALP_ENST00000440823	49	0.691543	0.281151	0.0272082
GALP_ENST00000590002	49	0.691543	0.281151	0.0272082
RTCA_ENST00000370126	49	0.702882	0.274349	0.0226735
PCDHB2_ENST00000624874	50	0.73104	0.204424	0.064438
NEDD8_ENST00000524927	50	0.73993	0.206646	0.053328
AL034430.1	50	0.755482	0.195536	0.048884
SPAG11A_ENST00000454911	50	0.722152	0.231088	0.046662
CMC2_ENST00000486645	50	0.74215	0.213312	0.04444
PPP4C_ENST00000627746	50	0.744376	0.21109	0.04444
SPAG11B_ENST00000528168	50	0.722152	0.235532	0.042218
FBF1_ENST00000586631	50	0.759932	0.19998	0.039996
ZNF286A_ENST00000581529	50	0.735486	0.224422	0.039996
ZNF525_ENST00000475179	50	0.731042	0.231088	0.037774
LHX6_ENST00000482062	50	0.733264	0.231088	0.035552
IFI27L1_ENST00000557066	50	0.684378	0.279972	0.035552
IFI27L1_ENST00000557218	50	0.684378	0.279972	0.035552
RUVBL2_ENST00000640699	50	0.717708	0.253308	0.028886
Z84492.1	50	0.699932	0.279972	0.019998
UBE2C_ENST00000243893	50	0.719934	0.259974	0.019998
MROH6_ENST00000524906	50	0.691044	0.293304	0.015554
MROH6_ENST00000533679	50	0.691044	0.293304	0.015554
MROH6_ENST00000534459	50	0.691044	0.293304	0.015554
ABCC8_ENST00000612903	50	0.746594	0.237754	0.015554
RANBP2_ENST00000629728	51	0.723243	0.211308	0.0653529
MRPL52_ENST00000557221	51	0.716708	0.217843	0.0653529
PRM1	51	0.725422	0.211308	0.0631745
ZSCAN30_ENST00000601405	51	0.734133	0.202594	0.0631745
HTN3	51	0.742851	0.196059	0.0609961
HTN3_ENST00000526767	51	0.742851	0.196059	0.0609961
ATP5F1E	51	0.729776	0.213486	0.0566392
ATP5F1E_ENST00000395659	51	0.729776	0.213486	0.0566392
ATP5F1E_ENST00000395663	51	0.729776	0.213486	0.0566392
MAPKAPK5_ENST00000547305	51	0.740673	0.202594	0.0566392
UBE3A_ENST00000636667	51	0.729778	0.215665	0.0544608
KCNU1_ENST00000518904	51	0.7276	0.220022	0.0522824
RPL39	51	0.740671	0.209129	0.0501039
RPL39L	51	0.747206	0.204773	0.0479255
RPL39L_ENST00000433055	51	0.747206	0.204773	0.0479255
RPL39L_ENST00000455270	51	0.747206	0.204773	0.0479255
CNOT7_ENST00000628418	51	0.760278	0.191702	0.0479255
CARD18_ENST00000526823	51	0.751565	0.200416	0.0479255
CARD18_ENST00000532895	51	0.751565	0.200416	0.0479255
ZNF208_ENST00000597040	51	0.742851	0.209129	0.0479255
ING4_ENST00000619641	51	0.747208	0.206951	0.0457471
LST1_ENST00000376110	51	0.736312	0.220022	0.0435686
SYNPR_ENST00000472899	51	0.753743	0.202594	0.0435686
HNMT_ENST00000280096	51	0.773351	0.185167	0.0413902
TOMM7_ENST00000405021	51	0.742851	0.215665	0.0413902
RPL30_ENST00000523172	51	0.742849	0.215665	0.0413902
ZNF175_ENST00000545217	51	0.742849	0.215665	0.0413902
CEACAM8_ENST00000599005	51	0.694924	0.267947	0.0370333
MDM2_ENST00000545204	51	0.734137	0.230914	0.0348549
TOMM5_ENST00000321301	51	0.736316	0.230914	0.0326765
AP003071.5	51	0.699278	0.267947	0.0326765
FKBP4_ENST00000630279	51	0.736318	0.230914	0.0326765
FAM72A_ENST00000607379	51	0.75592	0.213486	0.030498
PXT1_ENST00000619547	51	0.777704	0.191702	0.030498
C12orf75_ENST00000612117	51	0.714529	0.254876	0.030498
FBXL8_ENST00000518148	51	0.716706	0.252698	0.030498
FLII_ENST00000628188	51	0.716708	0.252698	0.030498
SMARCE1_ENST00000643806	51	0.729778	0.246163	0.0239627
KRTAP19-2	52	0.713606	0.200835	0.0854615
ARL1_ENST00000551688	52	0.724294	0.207244	0.0683692
ZNF771_ENST00000566625	52	0.762752	0.17306	0.0640962
STATH_ENST00000381060	52	0.726429	0.211517	0.0619596
MRPL52_ENST00000311892	52	0.752065	0.185879	0.0619596
APOA2_ENST00000463812	52	0.724288	0.217927	0.0576865
APOA2_ENST00000468465	52	0.724288	0.217927	0.0576865
SUMO2_ENST00000578238	52	0.745658	0.196562	0.0576865
YTHDF3_ENST00000517371	52	0.756337	0.188015	0.05555
RPS27L_ENST00000411926	52	0.717879	0.226473	0.05555
RPS27L_ENST00000455271	52	0.717879	0.226473	0.05555
RPS27L_ENST00000635699	52	0.717879	0.226473	0.05555
YTHDF1_ENST00000370334	52	0.745654	0.198698	0.05555
FADS2_ENST00000517839	52	0.709338	0.239292	0.0512769
UGP2_ENST00000626380	52	0.713606	0.237156	0.0491404
PLN	52	0.728565	0.2222	0.0491404
MPZ_ENST00000491222	52	0.734973	0.217927	0.0470038
RIC8A_ENST00000626818	52	0.709335	0.243565	0.0470038
CAPN5_ENST00000531028	52	0.720015	0.232883	0.0470038
MRPL52_ENST00000555536	52	0.722154	0.230746	0.0470038
FAM19A1_ENST00000617084	52	0.705058	0.249975	0.0448673
MPDU1_ENST00000582151	52	0.711469	0.243565	0.0448673
MTPN_ENST00000435723	52	0.749929	0.207244	0.0427308
AC007906.2	52	0.730698	0.226473	0.0427308
SNRPE_ENST00000367208	52	0.743521	0.21579	0.0405942
TTC32_ENST00000402414	52	0.732835	0.226473	0.0405942
PRR13_ENST00000546581	52	0.792663	0.16665	0.0405942
LBH_ENST00000406087	52	0.752071	0.209381	0.0384577
ADARB1_ENST00000611195	52	0.76275	0.198698	0.0384577
METTL21A_ENST00000448823	52	0.741383	0.2222	0.0363212
ZNF525_ENST00000593918	52	0.734973	0.22861	0.0363212
AC022167.5_ENST00000637929	52	0.709333	0.264931	0.0256385
CCL4_ENST00000621626	52	0.724292	0.249975	0.0256385
NAT14_ENST00000591590	52	0.728565	0.245702	0.0256385
THAP2_ENST00000547843	52	0.767021	0.209381	0.0235019
TROAP_ENST00000549534	52	0.715742	0.260658	0.0235019
CDIP1_ENST00000564828	52	0.741388	0.239292	0.0192288
RAN_ENST00000541679	53	0.716913	0.2222	0.0607906
TMEM14B_ENST00000473276	53	0.763028	0.180275	0.0565981
FAM19A5_ENST00000406880	53	0.729491	0.215911	0.0545019
SSBP4_ENST00000625926	53	0.704334	0.243162	0.0524057
HMSD_ENST00000526932	53	0.731589	0.218008	0.0503094
CCDC58_ENST00000497726	53	0.765126	0.184468	0.0503094
INPP4B_ENST00000507861	53	0.758836	0.190757	0.0503094
INPP4B_ENST00000630044	53	0.758836	0.190757	0.0503094
LYRM7_ENST00000510516	53	0.727392	0.224296	0.0482132
ALKBH5_ENST00000541285	53	0.719009	0.232681	0.0482132
SNAP23_ENST00000626061	53	0.714815	0.236874	0.0482132
IGIP	53	0.75884	0.194949	0.046117
TCL1A_ENST00000557043	53	0.7253	0.228489	0.046117
RAD18_ENST00000418463	53	0.737877	0.215911	0.046117
ERRFI1_ENST00000474874	53	0.729492	0.226392	0.0440208
THAP1_ENST00000345117	53	0.758838	0.197045	0.0440208
ZNF696_ENST00000520333	53	0.708528	0.247355	0.0440208
DEUP1_ENST00000530273	53	0.725298	0.230585	0.0440208
SRP54_ENST00000630962	53	0.739974	0.215911	0.0440208
ABCC5_ENST00000446941	53	0.731585	0.226392	0.0419245
COX7A2_ENST00000460985	53	0.700143	0.257836	0.0419245
S100A1_ENST00000368696	53	0.737877	0.2222	0.0398283
PKP4_ENST00000629219	53	0.706432	0.25574	0.0377321
BCAS3_ENST00000626960	53	0.729492	0.232681	0.0377321
RPS29_ENST00000557111	53	0.748357	0.213815	0.0377321
RAB17_ENST00000409576	53	0.733689	0.230585	0.0356358
C12orf73_ENST00000546819	53	0.735785	0.228489	0.0356358
FRMD4A_ENST00000493380	53	0.702242	0.262028	0.0356358
TTC38_ENST00000629918	53	0.742066	0.224296	0.0335396
MAZ_ENST00000569978	53	0.719009	0.249451	0.0314434
RPL22_ENST00000484532	53	0.737874	0.232681	0.0293472
SLC12A5_ENST00000628272	53	0.725296	0.259932	0.0146736
ERP29_ENST00000455836	53	0.708528	0.282991	0.00838491
PIGBOS1	54	0.736556	0.197511	0.065837
PIGBOS1_ENST00000567948	54	0.736556	0.197511	0.065837
TRIQK_ENST00000517858	54	0.728324	0.211913	0.0596648
TRIQK_ENST00000519069	54	0.728324	0.211913	0.0596648
TRIQK_ENST00000523580	54	0.728324	0.211913	0.0596648
TRIQK_ENST00000524037	54	0.728324	0.211913	0.0596648
AHI1_ENST00000488690	54	0.748902	0.195454	0.05555
CLK4_ENST00000520957	54	0.779759	0.16665	0.0534926
HKR1_ENST00000592168	54	0.70158	0.244831	0.0534926
SMIM14_ENST00000511809	54	0.726269	0.220143	0.0534926
MRPL33_ENST00000379666	54	0.734498	0.21397	0.0514352
SPINK13_ENST00000511106	54	0.761243	0.187224	0.0514352
NOX4_ENST00000393282	54	0.746844	0.203683	0.0493778
GNAO1_ENST00000569295	54	0.728326	0.2222	0.0493778
POLB_ENST00000521492	54	0.734496	0.218085	0.0473204
PSCA_ENST00000513264	54	0.730381	0.2222	0.0473204
RPLP1_ENST00000560274	54	0.730385	0.2222	0.0473204
HIGD1B_ENST00000587021	54	0.736557	0.218085	0.045263
LRTOMT_ENST00000539271	54	0.742728	0.211913	0.045263
LRTOMT_ENST00000539587	54	0.742728	0.211913	0.045263
LRTOMT_ENST00000642510	54	0.742728	0.211913	0.045263
CYB561D1_ENST00000533024	54	0.695406	0.261291	0.0432056
CEP41_ENST00000489512	54	0.732443	0.224257	0.0432056
CEP41_ENST00000616628	54	0.732443	0.224257	0.0432056
AC005702.1	54	0.709806	0.248946	0.0411481
NR2C2AP_ENST00000544883	54	0.740669	0.218085	0.0411481
GBGT1_ENST00000487864	54	0.707752	0.253061	0.0390907
NNAT_ENST00000346199	54	0.689233	0.271578	0.0390907
PMAIP1	54	0.718037	0.242774	0.0390907
SNRPD2_ENST00000585392	54	0.736557	0.224257	0.0390907
ZNF761_ENST00000610928	54	0.738613	0.2222	0.0390907
APELA	54	0.757133	0.205741	0.0370333
APELA_ENST00000515275	54	0.757133	0.205741	0.0370333
BAALC_ENST00000438105	54	0.718037	0.244831	0.0370333
WSB1_ENST00000583193	54	0.748904	0.21397	0.0370333
PEX13_ENST00000414712	54	0.693348	0.271578	0.0349759
DEGS2_ENST00000553834	54	0.713922	0.255119	0.0308611
PRCD	54	0.728326	0.240717	0.0308611
PRCD_ENST00000592014	54	0.728326	0.240717	0.0308611
LHX9_ENST00000367388	54	0.724213	0.246889	0.0288037
SRP68_ENST00000629930	54	0.701578	0.26952	0.0288037
TRAF7_ENST00000565383	54	0.742726	0.240717	0.0164593
MPHOSPH6_ENST00000569021	55	0.745385	0.18786	0.06666
APOPT1_ENST00000473127	55	0.785785	0.1515	0.06262
APOPT1_ENST00000477116	55	0.785785	0.1515	0.06262
APOPT1_ENST00000492189	55	0.785785	0.1515	0.06262
THAP5_ENST00000438865	55	0.735284	0.20402	0.0606
PLXND1_ENST00000504689	55	0.753467	0.18988	0.05656
STARD4_ENST00000509887	55	0.731242	0.21614	0.05252
STARD4_ENST00000512160	55	0.731242	0.21614	0.05252
SMIM27_ENST00000453396	55	0.717104	0.23028	0.05252
TOMM7_ENST00000621567	55	0.731244	0.21816	0.0505
SNX5_ENST00000606602	55	0.721145	0.22826	0.0505
INIP_ENST00000374234	55	0.735285	0.21614	0.04848
MRPL55_ENST00000366731	55	0.729224	0.2222	0.04848
MRPL55_ENST00000366732	55	0.729224	0.2222	0.04848
MRPL55_ENST00000459783	55	0.729224	0.2222	0.04848
CMC2_ENST00000564174	55	0.765584	0.18584	0.04848
CMC2_ENST00000565108	55	0.765584	0.18584	0.04848
ZNF85_ENST00000596476	55	0.737307	0.21412	0.04848
LIMS3_ENST00000487150	55	0.743362	0.21008	0.04646
RPS23_ENST00000511844	55	0.723162	0.23028	0.04646
SERP1_ENST00000487153	55	0.755485	0.19796	0.04646
LUC7L_ENST00000629543	55	0.713067	0.24038	0.04646
ZNF714_ENST00000620627	55	0.765587	0.18786	0.04646
AC114490.3	55	0.688824	0.26664	0.04444
TNP1	55	0.747404	0.20806	0.04444
TOMM7	55	0.731244	0.22422	0.04444
ATP8A1_ENST00000510289	55	0.735284	0.2222	0.04242
ATP5MF_ENST00000359832	55	0.733264	0.22422	0.04242
LRMDA_ENST00000496424	55	0.731242	0.22624	0.04242
NDUFA12_ENST00000547157	55	0.727204	0.23028	0.04242
XPNPEP3_ENST00000614001	55	0.702964	0.25452	0.04242
IL6ST_ENST00000396816	55	0.711042	0.25048	0.03838
PCNP_ENST00000469941	55	0.761545	0.19998	0.03838
B3GNT4_ENST00000537991	55	0.717105	0.24442	0.03838
ACYP1_ENST00000357971	55	0.751444	0.21008	0.03838
SFTA2_ENST00000634371	55	0.727202	0.23634	0.03636
REPIN1_ENST00000466559	55	0.727202	0.23634	0.03636
FBN1_ENST00000560355	55	0.702962	0.26058	0.03636
FBXL12_ENST00000592067	55	0.698925	0.26462	0.03636
CX3CL1_ENST00000564948	55	0.690842	0.27472	0.03434
FBXL12_ENST00000589626	55	0.704982	0.26058	0.03434
MAL_ENST00000349807	55	0.717102	0.25048	0.03232
PDCD6_ENST00000509581	55	0.721142	0.24644	0.03232
ZNF707_ENST00000442058	55	0.749425	0.21816	0.03232
AL160272.2	55	0.723167	0.24442	0.03232
TEX48_ENST00000612244	55	0.747407	0.22018	0.03232
PPP1R32_ENST00000366212	55	0.741345	0.22826	0.0303
CHCHD10_ENST00000520222	55	0.688822	0.28078	0.0303
TXNDC12_ENST00000610127	55	0.727202	0.2424	0.0303
FADS2_ENST00000522639	55	0.702962	0.27068	0.02626
FADS2_ENST00000574708	55	0.702962	0.27068	0.02626
PLAC9_ENST00000372270	55	0.721145	0.2525	0.02626
BEST1_ENST00000534553	55	0.713062	0.2626	0.02424
MALL_ENST00000427178	55	0.727202	0.25048	0.02222
CTXND2	55	0.733264	0.24442	0.02222
CYB561D1_ENST00000527072	55	0.682762	0.29694	0.0202
TMEM240_ENST00000624426	55	0.761553	0.21816	0.0202
BSG_ENST00000614867	55	0.702962	0.27876	0.01818
KRTAP20-1	56	0.690409	0.210296	0.0991964
EFCAB5_ENST00000638539	56	0.698345	0.224184	0.0773732
GLRB_ENST00000512619	56	0.714216	0.216248	0.0694375
TARS_ENST00000627006	56	0.722154	0.210296	0.0674536
PNRC2_ENST00000579103	56	0.708266	0.226168	0.0654696
SCLT1_ENST00000503401	56	0.734055	0.206329	0.0595179
ZNF720_ENST00000539915	56	0.743975	0.196409	0.0595179
MYCBP_ENST00000494695	56	0.70628	0.236087	0.0575339
PQLC2L_ENST00000461040	56	0.724138	0.220216	0.05555
BCL2L15_ENST00000393320	56	0.738025	0.208312	0.0535661
PIP4P2_ENST00000630164	56	0.702313	0.244023	0.0535661
ZNF789_ENST00000493485	56	0.741996	0.204345	0.0535661
AL138694.1	56	0.734057	0.21228	0.0535661
KITLG_ENST00000357116	56	0.757864	0.188473	0.0535661
ZNF789_ENST00000483089	56	0.747948	0.200377	0.0515821
RPS29_ENST00000245458	56	0.740009	0.210296	0.0495982
RPS29_ENST00000556230	56	0.740009	0.210296	0.0495982
TMEM263_ENST00000551489	56	0.726121	0.226168	0.0476143
PDCD2L_ENST00000587065	56	0.753898	0.198393	0.0476143
COX7C_ENST00000515763	56	0.730089	0.224184	0.0456304
SPTY2D1OS_ENST00000511927	56	0.728109	0.228152	0.0436464
MTLN_ENST00000426713	56	0.700329	0.257911	0.0416625
MTLN_ENST00000611969	56	0.700329	0.257911	0.0416625
GLIS3_ENST00000645097	56	0.728107	0.230136	0.0416625
UQCR11	56	0.712232	0.246007	0.0416625
UQCR11_ENST00000585671	56	0.712232	0.246007	0.0416625
UQCR11_ENST00000589880	56	0.712232	0.246007	0.0416625
OLFML1_ENST00000528758	56	0.710252	0.249975	0.0396786
SCGB1A1_ENST00000534397	56	0.757868	0.202361	0.0396786
DIO2_ENST00000557125	56	0.722155	0.238071	0.0396786
ADH5_ENST00000626055	56	0.732071	0.230136	0.0376946
ERICH5_ENST00000545282	56	0.753896	0.208313	0.0376946
CPSF6_ENST00000551516	56	0.753895	0.208313	0.0376946
NASP_ENST00000629893	56	0.706282	0.257911	0.0357107
CHRAC1_ENST00000519533	56	0.722154	0.242039	0.0357107
PPCS_ENST00000372556	56	0.722155	0.244023	0.0337268
MRPL49_ENST00000534078	56	0.686445	0.281718	0.0317429
C19orf53_ENST00000593274	56	0.72017	0.247991	0.0317429
GLI4_ENST00000517468	56	0.718184	0.251959	0.0297589
ZNF256_ENST00000598928	56	0.718186	0.251959	0.0297589
SRP14_ENST00000558720	56	0.71025	0.259895	0.0297589
SRP14_ENST00000560773	56	0.71025	0.259895	0.0297589
MANBAL_ENST00000397150	56	0.718184	0.251959	0.0297589
ZNF671_ENST00000596939	56	0.694379	0.275766	0.0297589
NPLOC4_ENST00000572760	56	0.712234	0.259895	0.027775
NPLOC4_ENST00000573876	56	0.712234	0.259895	0.027775
MAST4_ENST00000407621	56	0.722152	0.249975	0.027775
CHCHD7_ENST00000519367	56	0.732077	0.240055	0.027775
CHCHD7_ENST00000521831	56	0.732077	0.240055	0.027775
EXD3_ENST00000465160	56	0.72017	0.257911	0.0218232
EXOG_ENST00000630638	56	0.714216	0.265846	0.0198393
AC009477.2	56	0.684457	0.309493	0.00595179
MED31_ENST00000574128	57	0.74067	0.194912	0.0643211
HTN1	57	0.754316	0.185167	0.0604228
HTN1_ENST00000246896	57	0.754316	0.185167	0.0604228
HTN1_ENST00000610341	57	0.754316	0.185167	0.0604228
SEM1_ENST00000623498	57	0.769905	0.169574	0.0604228
TAF1B_ENST00000625239	57	0.73677	0.204658	0.0584737
DPH3_ENST00000383775	57	0.750414	0.192963	0.0565246
AFMID_ENST00000589256	57	0.717282	0.226098	0.0565246
COX14	57	0.72703	0.220251	0.0526263
COX14_ENST00000317943	57	0.72703	0.220251	0.0526263
COX14_ENST00000548985	57	0.72703	0.220251	0.0526263
COX14_ENST00000550654	57	0.72703	0.220251	0.0526263
ADGRE3_ENST00000595472	57	0.707533	0.239742	0.0526263
ZNF66_ENST00000360204	57	0.732877	0.214404	0.0526263
GABARAPL2_ENST00000568455	57	0.748467	0.20076	0.0506772
PARP8_ENST00000503665	57	0.740672	0.214404	0.0448298
TRNT1_ENST00000339437	57	0.74067	0.214404	0.0448298
TRNT1_ENST00000402675	57	0.74067	0.214404	0.0448298
TRNT1_ENST00000420393	57	0.74067	0.214404	0.0448298
GLIPR1L1_ENST00000548623	57	0.738721	0.216353	0.0448298
IMMP1L_ENST00000533642	57	0.738719	0.216353	0.0448298
IMMP1L_ENST00000534812	57	0.738719	0.216353	0.0448298
FBXO11_ENST00000405808	57	0.76016	0.196861	0.0428807
MORN2_ENST00000409131	57	0.750416	0.206607	0.0428807
CDC42SE2_ENST00000503291	57	0.736777	0.220251	0.0428807
FAM122C_ENST00000494709	57	0.734823	0.2222	0.0428807
TXNL4A_ENST00000588162	57	0.767961	0.191014	0.0409316
PPIH_ENST00000372549	57	0.746516	0.214404	0.0389825
PLD1_ENST00000627725	57	0.746518	0.214404	0.0389825
WDYHV1_ENST00000518125	57	0.758214	0.202709	0.0389825
CCDC60_ENST00000539847	57	0.74457	0.216353	0.0389825
PRAC1	57	0.717279	0.24364	0.0389825
LBX2_ENST00000341396	57	0.707533	0.255335	0.0370333
BCAR1_ENST00000546196	57	0.713381	0.253386	0.0331351
SEPT9_ENST00000590917	57	0.740674	0.228047	0.031186
C19orf54_ENST00000470681	57	0.693893	0.274826	0.031186
COPS9_ENST00000607357	57	0.775756	0.198811	0.0253386
KRTAP19-6	58	0.68001	0.231778	0.0881138
SMIM11A	58	0.729816	0.206876	0.0632121
SMIM11A_ENST00000399292	58	0.729816	0.206876	0.0632121
SMIM11B	58	0.729816	0.206876	0.0632121
SMIM11B_ENST00000619874	58	0.729816	0.206876	0.0632121
SMIM11B_ENST00000622934	58	0.729816	0.206876	0.0632121
SMIM11B_ENST00000623661	58	0.729816	0.206876	0.0632121
SMIM11B_ENST00000624758	58	0.729816	0.206876	0.0632121
SUMO1_ENST00000409181	58	0.748971	0.189636	0.0612966
POLR2K	58	0.750888	0.187721	0.0612966
KRTAP21-3	58	0.758547	0.181974	0.059381
ZNF816_ENST00000391786	58	0.724071	0.216453	0.059381
GSAP_ENST00000430584	58	0.745147	0.199214	0.05555
NDUFB1_ENST00000553514	58	0.747057	0.201129	0.051719
NDUFB1_ENST00000555441	58	0.747057	0.201129	0.051719
NDUFB1_ENST00000605997	58	0.747057	0.201129	0.051719
RAB3GAP1_ENST00000425393	58	0.743222	0.20496	0.051719
ATP5MD	58	0.7279	0.220284	0.051719
ATP5MD_ENST00000309579	58	0.7279	0.220284	0.051719
ATP5MD_ENST00000337003	58	0.7279	0.220284	0.051719
ATP5MD_ENST00000369811	58	0.7279	0.220284	0.051719
ATP5MD_ENST00000369815	58	0.7279	0.220284	0.051719
ATP5MPL_ENST00000286953	58	0.745143	0.203045	0.051719
ATP5MPL_ENST00000554880	58	0.745143	0.203045	0.051719
ATP5MPL_ENST00000557040	58	0.745143	0.203045	0.051719
RBMX2_ENST00000370947	58	0.727898	0.220284	0.051719
LUZP6	58	0.716403	0.233693	0.0498034
AMN1_ENST00000541931	58	0.716405	0.233693	0.0498034
ATP6V0E1_ENST00000519911	58	0.725986	0.229862	0.0440569
PLAC8_ENST00000509973	58	0.745143	0.210707	0.0440569
NEU3_ENST00000526068	58	0.697253	0.258595	0.0440569
CHTF8_ENST00000518041	58	0.710662	0.245186	0.0440569
GYPB_ENST00000513128	58	0.702998	0.254764	0.0421414
NAA50_ENST00000497255	58	0.754716	0.203045	0.0421414
PLIN5_ENST00000586133	58	0.720238	0.237524	0.0421414
PLIN5_ENST00000592610	58	0.720238	0.237524	0.0421414
ZEB2_ENST00000462355	58	0.745141	0.214538	0.0402259
ZEB2_ENST00000465070	58	0.745141	0.214538	0.0402259
ZEB2_ENST00000629520	58	0.745141	0.214538	0.0402259
NAA50_ENST00000630058	58	0.756631	0.203045	0.0402259
RARS_ENST00000626454	58	0.704912	0.256679	0.0383103
ROPN1_ENST00000459660	58	0.7279	0.233693	0.0383103
ROPN1_ENST00000479867	58	0.7279	0.233693	0.0383103
ROPN1_ENST00000484329	58	0.7279	0.233693	0.0383103
ROPN1_ENST00000495093	58	0.7279	0.233693	0.0383103
ROPN1B_ENST00000504401	58	0.722153	0.23944	0.0383103
PRR13_ENST00000549068	58	0.74514	0.216453	0.0383103
CDK7_ENST00000626796	58	0.722152	0.241355	0.0363948
ZNF551_ENST00000596085	58	0.750888	0.214538	0.0344793
GCSH_ENST00000639689	58	0.662771	0.304567	0.0325638
CENPX_ENST00000580435	58	0.724067	0.245186	0.0306483
ZNF776_ENST00000431353	58	0.739393	0.229862	0.0306483
BET1L_ENST00000332865	58	0.735564	0.233693	0.0306483
MAG_ENST00000597035	58	0.722155	0.249017	0.0287328
FHIT_ENST00000341848	58	0.727898	0.245186	0.0268172
CENPM_ENST00000472374	58	0.695336	0.27775	0.0268172
PRKAB1_ENST00000630317	58	0.756633	0.218369	0.0249017
LYPLA1_ENST00000522007	58	0.708745	0.270088	0.0210707
CMPK1_ENST00000471289	58	0.704914	0.27775	0.0172397
ELMOD2_ENST00000511887	59	0.747576	0.192071	0.0602576
MSRA_ENST00000521209	59	0.736278	0.203369	0.0602576
PATE4_ENST00000534411	59	0.745695	0.19772	0.0564915
ADIG_ENST00000373348	59	0.719329	0.225966	0.0546085
SPINK7_ENST00000523535	59	0.743807	0.203369	0.0527254
SERF2_ENST00000249786	59	0.753225	0.193954	0.0527254
SERF2_ENST00000381359	59	0.753225	0.193954	0.0527254
ATP6V1G3_ENST00000309309	59	0.74569	0.203369	0.0508424
ETDA	59	0.738159	0.210902	0.0508424
ETDA_ENST00000454551	59	0.738159	0.210902	0.0508424
ETDB	59	0.738159	0.210902	0.0508424
ETDB_ENST00000426364	59	0.738159	0.210902	0.0508424
ETDC	59	0.741925	0.207136	0.0508424
SMIM30	59	0.689202	0.261744	0.0489593
SMIM30_ENST00000441359	59	0.689202	0.261744	0.0489593
SPTY2D1OS_ENST00000635674	59	0.740046	0.214668	0.0451932
ACP5_ENST00000590420	59	0.708034	0.24668	0.0451932
C5orf63_ENST00000509733	59	0.736276	0.218434	0.0451932
CREM_ENST00000469949	59	0.741927	0.212785	0.0451932
CALML4_ENST00000395465	59	0.724981	0.229732	0.0451932
ALKAL2_ENST00000344414	59	0.751341	0.205253	0.0433102
ALKAL2_ENST00000405290	59	0.751341	0.205253	0.0433102
SCP2_ENST00000408941	59	0.738158	0.218434	0.0433102
SCP2_ENST00000488965	59	0.738158	0.218434	0.0433102
SMIM4_ENST00000476842	59	0.711798	0.244797	0.0433102
FIS1_ENST00000474120	59	0.681666	0.274925	0.0433102
ATOX1_ENST00000520382	59	0.719329	0.239147	0.0414271
ATOX1_ENST00000522314	59	0.719329	0.239147	0.0414271
ADAM10_ENST00000461408	59	0.683551	0.274925	0.0414271
DNAJC19_ENST00000486355	59	0.719331	0.241031	0.0395441
C12orf73_ENST00000547975	59	0.717449	0.242914	0.0395441
C12orf73_ENST00000552940	59	0.717449	0.242914	0.0395441
IDNK_ENST00000405990	59	0.736285	0.225966	0.037661
SMCO4	59	0.71368	0.248563	0.037661
SMCO4_ENST00000525141	59	0.71368	0.248563	0.037661
SMCO4_ENST00000527149	59	0.71368	0.248563	0.037661
SMCO4_ENST00000596676	59	0.71368	0.248563	0.037661
KCNA2_ENST00000638477	59	0.736276	0.229732	0.0338949
LST1_ENST00000303757	59	0.685432	0.280575	0.0338949
CTXND1	59	0.747576	0.218434	0.0338949
AP5S1_ENST00000379573	59	0.723093	0.244797	0.0320119
ROMO1_ENST00000374072	59	0.728747	0.239147	0.0320119
CMTM3_ENST00000565922	59	0.711795	0.263627	0.0244797
TRAPPC2L_ENST00000564365	59	0.773944	0.203369	0.0225966
SMIM24_ENST00000587847	60	0.759187	0.172205	0.0685117
SMIM24_ENST00000591708	60	0.759187	0.172205	0.0685117
NDUFAF2_ENST00000511107	60	0.727707	0.203683	0.0685117
SPDL1_ENST00000629457	60	0.744377	0.194425	0.061105
C15orf61_ENST00000557807	60	0.722155	0.220348	0.0574017
ODF2L_ENST00000478286	60	0.744372	0.19998	0.05555
ODF2L_ENST00000486215	60	0.744372	0.19998	0.05555
CHCHD7_ENST00000517933	60	0.738817	0.205535	0.05555
LRRC28_ENST00000558879	60	0.74067	0.203683	0.05555
COL19A1_ENST00000478620	60	0.725858	0.220348	0.0536983
RPL37A_ENST00000441179	60	0.753635	0.194425	0.0518467
RPL37A_ENST00000598925	60	0.753635	0.194425	0.0518467
AC010255.3_ENST00000514637	60	0.735113	0.212942	0.0518467
TRIM36_ENST00000379618	60	0.74808	0.201832	0.049995
PMP2_ENST00000519260	60	0.775855	0.174057	0.049995
CBX4_ENST00000448310	60	0.733262	0.216645	0.049995
RFESD_ENST00000513950	60	0.753633	0.198128	0.0481433
AL512428.1	60	0.712893	0.240717	0.0462917
TIMM9_ENST00000556367	60	0.735113	0.218497	0.0462917
TBCB_ENST00000586868	60	0.738823	0.214793	0.0462917
ALKAL2_ENST00000401503	60	0.75178	0.203683	0.04444
C9orf64_ENST00000376340	60	0.738818	0.218497	0.0425883
TPD52_ENST00000519303	60	0.727708	0.229607	0.0425883
TRMT9B_ENST00000400069	60	0.74252	0.214793	0.0425883
TRMT9B_ENST00000528753	60	0.74252	0.214793	0.0425883
SSSCA1_ENST00000527920	60	0.731412	0.225903	0.0425883
ZNF286A_ENST00000580259	60	0.740672	0.216645	0.0425883
ZNF765_ENST00000594030	60	0.722153	0.235162	0.0425883
ATP5IF1_ENST00000465645	60	0.70734	0.251827	0.0407367
RPL29_ENST00000481629	60	0.736967	0.2222	0.0407367
MARVELD3_ENST00000567501	60	0.716598	0.242568	0.0407367
CYB5A_ENST00000299438	60	0.744375	0.218497	0.0370333
GADD45A_ENST00000617962	60	0.733263	0.231458	0.0351817
TAF8_ENST00000482432	60	0.729562	0.235162	0.0351817
OAZ2_ENST00000559753	60	0.751782	0.216645	0.0314783
ISCA2_ENST00000554924	60	0.69808	0.272195	0.0296267
FGF1_ENST00000360966	60	0.749927	0.224052	0.0259233
MARS_ENST00000630803	60	0.701783	0.272195	0.0259233
RAB11B_ENST00000601897	60	0.729558	0.24442	0.0259233
CKLF-CMTM1_ENST00000532838	60	0.729562	0.24442	0.0259233
TMEM272_ENST00000626362	60	0.724005	0.251827	0.0240717
SMIM3	60	0.729563	0.249975	0.0203683
MT1B	61	0.730348	0.203987	0.0655672
ZNF480_ENST00000490272	61	0.759495	0.174846	0.0655672
MT1H	61	0.741275	0.196702	0.0619246
MT1HL1	61	0.735811	0.203987	0.0601033
ALG13_ENST00000482742	61	0.724885	0.214915	0.0601033
ALG13_ENST00000623189	61	0.724885	0.214915	0.0601033
MT1A	61	0.750384	0.189416	0.0601033
MT1F	61	0.746739	0.193059	0.0601033
MT1X	61	0.741275	0.198523	0.0601033
MS4A13_ENST00000527948	61	0.732172	0.209451	0.058282
MT1E	61	0.741275	0.200344	0.058282
MT1G_ENST00000444837	61	0.746739	0.19488	0.058282
MT2A	61	0.748561	0.19488	0.0564607
GALNTL6_ENST00000511251	61	0.726707	0.218557	0.0546393
MT1M	61	0.744918	0.202166	0.052818
TMEM202_ENST00000567679	61	0.701207	0.245877	0.052818
TMBIM4_ENST00000544599	61	0.715779	0.233128	0.0509967
ZNF101_ENST00000444249	61	0.728526	0.220379	0.0509967
ZNF669_ENST00000366501	61	0.737634	0.213093	0.0491754
TRIM36_ENST00000379617	61	0.728531	0.2222	0.0491754
ZNF625_ENST00000455799	61	0.754028	0.196702	0.0491754
MGA_ENST00000619521	61	0.723062	0.229485	0.0473541
TIMM9_ENST00000555930	61	0.735811	0.216736	0.0473541
CMTM1_ENST00000531885	61	0.7176	0.238592	0.0437115
TATDN3_ENST00000530441	61	0.7431	0.214915	0.0418902
C8orf59_ENST00000545322	61	0.754026	0.203987	0.0418902
C8orf59_ENST00000614462	61	0.754026	0.203987	0.0418902
RPS20_ENST00000518875	61	0.721243	0.23677	0.0418902
RPS20_ENST00000523936	61	0.721243	0.23677	0.0418902
C12orf76_ENST00000546627	61	0.695743	0.262269	0.0418902
DEFB133	61	0.766777	0.193059	0.0400689
LENEP	61	0.706672	0.254984	0.0382475
PTS_ENST00000525803	61	0.750382	0.211272	0.0382475
CIPC_ENST00000555437	61	0.726708	0.234949	0.0382475
PTPA_ENST00000414510	61	0.74492	0.220379	0.0346049
PTPA_ENST00000419582	61	0.74492	0.220379	0.0346049
PTPA_ENST00000423100	61	0.74492	0.220379	0.0346049
PTPA_ENST00000432651	61	0.74492	0.220379	0.0346049
PTPA_ENST00000434095	61	0.74492	0.220379	0.0346049
PTPA_ENST00000435132	61	0.74492	0.220379	0.0346049
FXYD3_ENST00000603449	61	0.724884	0.244056	0.0309623
FXYD3_ENST00000605552	61	0.724884	0.244056	0.0309623
COG6_ENST00000630730	61	0.710313	0.260448	0.029141
GNG2_ENST00000554875	61	0.763134	0.209451	0.0273197
NDUFA3_ENST00000391763	61	0.712134	0.262269	0.0254984
CD52	61	0.752205	0.224021	0.023677
GNPTG_ENST00000527137	61	0.708493	0.267733	0.023677
KRTAP6-2	62	0.7114	0.209656	0.0788452
DEFB110_ENST00000393660	62	0.75799	0.173818	0.0680935
MT4	62	0.749034	0.186361	0.0645097
SEM1_ENST00000444799	62	0.770534	0.16665	0.0627177
MINOS1_ENST00000617872	62	0.731116	0.207865	0.0609258
STATH	62	0.725739	0.21324	0.0609258
STATH_ENST00000615994	62	0.725739	0.21324	0.0609258
SERF1A_ENST00000317633	62	0.761579	0.179194	0.0591339
SERF1B_ENST00000380751	62	0.761579	0.179194	0.0591339
ZNF771_ENST00000564550	62	0.752619	0.188153	0.0591339
USP8_ENST00000625664	62	0.714984	0.227576	0.0573419
TSTD1_ENST00000466967	62	0.723945	0.218616	0.0573419
MT1G	62	0.745447	0.197113	0.0573419
GYPB_ENST00000429670	62	0.702442	0.241911	0.05555
SUMO1_ENST00000409205	62	0.738282	0.206073	0.05555
SUMO1_ENST00000409498	62	0.738282	0.206073	0.05555
SNCAIP_ENST00000414317	62	0.714984	0.229368	0.05555
SKA2_ENST00000581068	62	0.74545	0.198905	0.05555
ZNF85_ENST00000597314	62	0.725737	0.218616	0.05555
PUS10_ENST00000398658	62	0.741865	0.204281	0.0537581
ZNF138_ENST00000440598	62	0.729323	0.216824	0.0537581
ZNF788P_ENST00000430298	62	0.747242	0.200697	0.0519661
ARHGEF33_ENST00000411874	62	0.770534	0.179194	0.0501742
ARHGEF33_ENST00000433605	62	0.770534	0.179194	0.0501742
NRXN1_ENST00000635519	62	0.761577	0.188153	0.0501742
ZNF789_ENST00000379724	62	0.750827	0.200697	0.0483823
RERGL_ENST00000536890	62	0.729319	0.2222	0.0483823
COPS7B_ENST00000631349	62	0.70244	0.250871	0.0465903
PCP4	62	0.750824	0.204281	0.0447984
SMIM6	62	0.738279	0.218616	0.0430065
SMIM6_ENST00000556126	62	0.738279	0.218616	0.0430065
GLIPR2_ENST00000396613	62	0.745448	0.211448	0.0430065
PRDM2_ENST00000503842	62	0.714984	0.245495	0.0394226
PRDM2_ENST00000505823	62	0.714984	0.245495	0.0394226
B4GALT4_ENST00000471675	62	0.732903	0.227576	0.0394226
GIMAP6_ENST00000493969	62	0.706024	0.254455	0.0394226
SHLD1_ENST00000378979	62	0.736487	0.223992	0.0394226
LSM5_ENST00000409292	62	0.740074	0.2222	0.0376306
LSM5_ENST00000409782	62	0.740074	0.2222	0.0376306
LSM5_ENST00000409909	62	0.740074	0.2222	0.0376306
LSM5_ENST00000409952	62	0.740074	0.2222	0.0376306
LSM5_ENST00000410044	62	0.740074	0.2222	0.0376306
ACYP1_ENST00000555135	62	0.757992	0.204281	0.0376306
UBR1_ENST00000627960	62	0.716779	0.245495	0.0376306
MUTYH_ENST00000531105	62	0.736487	0.227576	0.0358387
PLA2G2D_ENST00000617227	62	0.723948	0.240119	0.0358387
AC073610.2	62	0.740071	0.223992	0.0358387
BORCS8_ENST00000585679	62	0.698856	0.265206	0.0358387
COPS7A_ENST00000626119	62	0.718569	0.247287	0.0340468
SLTM_ENST00000628684	62	0.713195	0.252663	0.0340468
WDFY2_ENST00000612477	62	0.734698	0.232952	0.0322548
ZNF814_ENST00000597807	62	0.713192	0.256247	0.0304629
AC015813.2	62	0.734697	0.234744	0.0304629
FBXL8_ENST00000521920	62	0.725735	0.247287	0.026879
UQCR10_ENST00000401406	62	0.731113	0.245495	0.0232952
AL662884.4	62	0.714984	0.263415	0.0215032
LRRC59_ENST00000576448	62	0.718568	0.259831	0.0215032
KRTAP19-8	63	0.694817	0.21691	0.0881746
KRTAP19-7	63	0.696581	0.2222	0.0811206
TSLP_ENST00000379706	63	0.7248	0.208092	0.0670127
CSTA_ENST00000479204	63	0.717743	0.2222	0.0599587
KRTAP8-1	63	0.714216	0.225727	0.0599587
IL24_ENST00000611909	63	0.733616	0.211619	0.0546683
URM1_ENST00000372847	63	0.698344	0.248652	0.0529048
LYRM7_ENST00000507584	63	0.742432	0.204565	0.0529048
SPHAR	63	0.756541	0.192221	0.0511413
COX17	63	0.733616	0.215146	0.0511413
COX17_ENST00000497116	63	0.733616	0.215146	0.0511413
ADSSL1_ENST00000556623	63	0.726562	0.2222	0.0511413
AP2B1_ENST00000628168	63	0.756541	0.193984	0.0493778
URM1_ENST00000372850	63	0.723033	0.22749	0.0493778
AP1S3_ENST00000396653	63	0.740668	0.211619	0.0476143
NDUFA12_ENST00000547986	63	0.724797	0.229254	0.0458508
COX7C	63	0.726562	0.22749	0.0458508
COX7C_ENST00000247655	63	0.726562	0.22749	0.0458508
RBMS2_ENST00000639027	63	0.735378	0.218673	0.0458508
MPRIP_ENST00000395806	63	0.763597	0.190457	0.0458508
ASNSD1_ENST00000607690	63	0.747724	0.208092	0.0440873
C6orf52_ENST00000460742	63	0.76536	0.192221	0.0423238
COA1_ENST00000640232	63	0.71951	0.238071	0.0423238
STARD13_ENST00000439831	63	0.726562	0.231017	0.0423238
TRMT112_ENST00000535126	63	0.698344	0.259233	0.0423238
CKS1B_ENST00000368439	63	0.742437	0.21691	0.0405603
NMNAT3_ENST00000511444	63	0.735381	0.223963	0.0405603
RBCK1_ENST00000400247	63	0.733616	0.225727	0.0405603
ST6GALNAC1_ENST00000589992	63	0.723038	0.238071	0.0387968
ZNF548_ENST00000597400	63	0.733619	0.22749	0.0387968
PEX13_ENST00000444100	63	0.693056	0.269814	0.0370333
IPO5_ENST00000631030	63	0.742435	0.220437	0.0370333
UQCR10	63	0.74596	0.21691	0.0370333
AL391650.1	63	0.680713	0.283922	0.0352698
AL391650.1_ENST00000433939	63	0.680713	0.283922	0.0352698
AC079341.3_ENST00000643802	63	0.715979	0.248652	0.0352698
HILPDA	63	0.714219	0.250416	0.0352698
HILPDA_ENST00000435296	63	0.714219	0.250416	0.0352698
C12orf75	63	0.721271	0.245125	0.0335063
ATP6V0C_ENST00000568562	63	0.745959	0.223963	0.0299794
CENPX_ENST00000306704	63	0.719506	0.250416	0.0299794
AL662899.1	63	0.728325	0.243362	0.0282159
ANK3_ENST00000486349	63	0.74596	0.225727	0.0282159
SLF2_ENST00000609386	63	0.703637	0.268051	0.0282159
MCRIP1_ENST00000573478	63	0.751249	0.2222	0.0264524
RASGRP2_ENST00000394428	63	0.712452	0.26276	0.0246889
AP3S2_ENST00000617003	63	0.703635	0.278632	0.0176349
CYBC1_ENST00000342572	63	0.751251	0.231017	0.0176349
CYBC1_ENST00000580560	63	0.751251	0.231017	0.0176349
CYBC1_ENST00000581196	63	0.751251	0.231017	0.0176349
CYBC1_ENST00000584503	63	0.751251	0.231017	0.0176349
MRPL52_ENST00000553711	64	0.718681	0.216992	0.0642297
MRPL52_ENST00000555345	64	0.718681	0.216992	0.0642297
MRPL52_ENST00000556840	64	0.718681	0.216992	0.0642297
TMA7	64	0.741248	0.197897	0.0607578
KLRF1_ENST00000354855	64	0.715209	0.223936	0.0607578
PTPN20_ENST00000374342	64	0.713472	0.227408	0.0590219
PTPN20_ENST00000395722	64	0.713472	0.227408	0.0590219
PTPN20_ENST00000508715	64	0.713472	0.227408	0.0590219
PTPN20_ENST00000513159	64	0.713472	0.227408	0.0590219
PTPN20_ENST00000513756	64	0.713472	0.227408	0.0590219
Z82206.1	64	0.742984	0.197897	0.0590219
CFAP97_ENST00000296775	64	0.782909	0.159706	0.0572859
NDUFS8_ENST00000528492	64	0.749927	0.196161	0.0538141
SNRPG_ENST00000438261	64	0.741253	0.206577	0.0520781
SNRPG_ENST00000449935	64	0.741253	0.206577	0.0520781
SNRPG_ENST00000482975	64	0.741253	0.206577	0.0520781
PEX11A_ENST00000561224	64	0.73257	0.215256	0.0520781
RPL38_ENST00000534490	64	0.727359	0.2222	0.0503422
NOP10	64	0.727363	0.2222	0.0503422
LSM5_ENST00000409987	64	0.727361	0.223936	0.0486063
HDAC8_ENST00000373583	64	0.746461	0.206577	0.0468703
CYTH1_ENST00000589296	64	0.751663	0.203105	0.0451344
KCTD2_ENST00000581589	64	0.746458	0.210048	0.0433984
BLOC1S1_ENST00000551926	64	0.730833	0.227408	0.0416625
CCDC85C_ENST00000555822	64	0.746456	0.211784	0.0416625
CCDC85C_ENST00000557769	64	0.746456	0.211784	0.0416625
RPS20_ENST00000520627	64	0.737777	0.223936	0.0381906
RPS20_ENST00000524349	64	0.737777	0.223936	0.0381906
MCF2L_ENST00000397036	64	0.74472	0.216992	0.0381906
S100A2_ENST00000497140	64	0.760345	0.203105	0.0364547
DEFB4A	64	0.732569	0.23088	0.0364547
DEFB4B	64	0.732569	0.23088	0.0364547
FXYD2_ENST00000260287	64	0.739511	0.223936	0.0364547
FXYD2_ENST00000528014	64	0.739511	0.223936	0.0364547
FXYD2_ENST00000532119	64	0.739511	0.223936	0.0364547
PKIG_ENST00000372887	64	0.729102	0.234352	0.0364547
SLC10A7_ENST00000502607	64	0.715211	0.249975	0.0347187
FGFR2_ENST00000611527	64	0.749928	0.216992	0.0329828
AP002512.3_ENST00000641599	64	0.741253	0.225672	0.0329828
CCL4L2_ENST00000617416	64	0.710002	0.256919	0.0329828
CCL4L2_ENST00000620732	64	0.710002	0.256919	0.0329828
TXN2_ENST00000416967	64	0.74993	0.216992	0.0329828
VWA1_ENST00000338660	64	0.690905	0.27775	0.0312469
CLCN5_ENST00000482218	64	0.782917	0.189217	0.027775
ZNF264_ENST00000599653	64	0.713473	0.258655	0.027775
UTP23_ENST00000520733	64	0.755138	0.218728	0.0260391
TP53I11_ENST00000627720	64	0.734305	0.241295	0.0243031
CYB561D1_ENST00000496961	64	0.703058	0.274278	0.0225672
IPO7_ENST00000630083	64	0.722155	0.255183	0.0225672
C16orf74_ENST00000602583	64	0.760345	0.218728	0.0208312
KRTAP20-2	65	0.688822	0.230746	0.0803338
SEM1_ENST00000417009	65	0.762318	0.174342	0.0632415
BBOF1_ENST00000463558	65	0.746935	0.191434	0.0615323
AGK_ENST00000492693	65	0.724715	0.218782	0.0564046
KLHL23_ENST00000602521	65	0.743523	0.201689	0.0546954
KRTAP23-1	65	0.704205	0.242711	0.0529862
ELOC_ENST00000602840	65	0.734977	0.211945	0.0529862
ZNF180_ENST00000587047	65	0.709334	0.241002	0.0495677
CCL14_ENST00000620991	65	0.71788	0.234165	0.0478585
ANKRD65_ENST00000520296	65	0.716171	0.237583	0.0461492
SPINK1_ENST00000510027	65	0.724715	0.229037	0.0461492
SMKR1	65	0.736682	0.217072	0.0461492
NRSN2_ENST00000608467	65	0.733265	0.2222	0.04444
ATP6V0E1_ENST00000265093	65	0.733263	0.223909	0.0427308
C6orf52_ENST00000379586	65	0.764031	0.193143	0.0427308
GYPB_ENST00000506516	65	0.700788	0.256385	0.0427308
BLNK_ENST00000495266	65	0.752066	0.205108	0.0427308
TMEM106C_ENST00000549288	65	0.728134	0.229037	0.0427308
PCLAF_ENST00000380258	65	0.714463	0.24442	0.0410215
FHL2_ENST00000607522	65	0.741808	0.217072	0.0410215
ZNF286B_ENST00000285274	65	0.740102	0.218782	0.0410215
MRPL33	65	0.734972	0.225618	0.0393123
TGFBI_ENST00000508076	65	0.723008	0.237583	0.0393123
SYNGR2_ENST00000589711	65	0.688822	0.271768	0.0393123
PDCD5_ENST00000592786	65	0.741809	0.218782	0.0393123
TSPO_ENST00000583777	65	0.693949	0.26664	0.0393123
SERP2	65	0.745231	0.217072	0.0376031
MPZL3_ENST00000525386	65	0.723008	0.241002	0.0358938
MCRIP2_ENST00000629534	65	0.697368	0.26664	0.0358938
DEFB106A	65	0.760609	0.205108	0.0341846
DEFB106B	65	0.760609	0.205108	0.0341846
ORMDL2_ENST00000550836	65	0.729843	0.235874	0.0341846
ZFPL1_ENST00000525509	65	0.729845	0.235874	0.0341846
ZFPL1_ENST00000526791	65	0.729845	0.235874	0.0341846
CCL2_ENST00000580907	65	0.731554	0.234165	0.0341846
TTLL12_ENST00000494035	65	0.755485	0.211945	0.0324754
C4orf46_ENST00000508457	65	0.71446	0.258094	0.0273477
PRR4_ENST00000544994	65	0.743517	0.229037	0.0273477
ENDOV_ENST00000518907	65	0.731554	0.24442	0.0239292
ENDOV_ENST00000520284	65	0.731554	0.24442	0.0239292
HINT1_ENST00000513012	65	0.746937	0.230746	0.02222
SVBP	66	0.744038	0.1919	0.0639667
SVBP_ENST00000372522	66	0.744038	0.1919	0.0639667
DEFB134	66	0.735623	0.202	0.0622833
DEFB134_ENST00000382205	66	0.735623	0.202	0.0622833
ONECUT1_ENST00000560699	66	0.755823	0.1818	0.0622833
SRP9_ENST00000366838	66	0.733936	0.205367	0.0606
SRP9_ENST00000626563	66	0.733936	0.205367	0.0606
TARS_ENST00000626210	66	0.732253	0.210417	0.0572333
GHRL_ENST00000439975	66	0.725518	0.218833	0.05555
ZSWIM7_ENST00000486655	66	0.688486	0.255867	0.05555
ORC5_ENST00000626700	66	0.728885	0.218833	0.0521833
TIMM9_ENST00000556007	66	0.738985	0.210417	0.0505
LST1_ENST00000376089	66	0.727202	0.223883	0.0488167
LST1_ENST00000418507	66	0.727202	0.223883	0.0488167
DDIAS_ENST00000528759	66	0.72552	0.225567	0.0488167
GOSR2_ENST00000640711	66	0.701952	0.249133	0.0488167
ZNF292_ENST00000392985	66	0.71542	0.23735	0.0471333
IL6ST_ENST00000381286	66	0.732256	0.223883	0.0437667
MT-ATP8	66	0.717102	0.239033	0.0437667
LY6E_ENST00000519546	66	0.723838	0.235667	0.0404
LY6E_ENST00000519611	66	0.723838	0.235667	0.0404
PTP4A2_ENST00000626355	66	0.735621	0.225567	0.0387167
MPC1_ENST00000341756	66	0.740673	0.220517	0.0387167
MPC1_ENST00000621685	66	0.740673	0.220517	0.0387167
ZNF131_ENST00000509931	66	0.760871	0.200317	0.0387167
RRM2B_ENST00000519962	66	0.760871	0.200317	0.0387167
FRMD8_ENST00000531296	66	0.707002	0.254183	0.0387167
IL4R_ENST00000628578	66	0.723838	0.23735	0.0387167
H2AFV_ENST00000381124	66	0.708685	0.254183	0.0370333
XYLB_ENST00000427323	66	0.749085	0.213783	0.0370333
SERP1	66	0.754139	0.210417	0.03535
SERP1_ENST00000239944	66	0.754139	0.210417	0.03535
MORN4_ENST00000478953	66	0.737303	0.22725	0.03535
ZIM2_ENST00000593931	66	0.765921	0.198633	0.03535
LY6E_ENST00000523847	66	0.727203	0.239033	0.0336667
ASB8_ENST00000629941	66	0.752458	0.213783	0.0336667
RPS21_ENST00000370562	66	0.742353	0.223883	0.0336667
C4orf3_ENST00000504110	66	0.735618	0.2323	0.0319833
FXYD2	66	0.738986	0.228933	0.0319833
SELENON_ENST00000630065	66	0.744038	0.225567	0.0303
WFDC1_ENST00000613603	66	0.712052	0.25755	0.0303
LST1_ENST00000339530	66	0.681752	0.28785	0.0303
NDUFC2-KCTD14_ENST00000528251	66	0.698585	0.2727	0.0286167
ELOB_ENST00000572954	66	0.744039	0.22725	0.0286167
PPP2R1A_ENST00000477989	66	0.718786	0.2525	0.0286167
UMPS_ENST00000628619	66	0.707003	0.265967	0.0269333
RASGRP2_ENST00000394429	66	0.715418	0.25755	0.0269333
POLR2K_ENST00000522439	67	0.7462	0.184061	0.0696448
DEFB123	67	0.721324	0.208934	0.0696448
DEFB110	67	0.756145	0.182403	0.0613537
LEMD1_ENST00000367149	67	0.708058	0.233807	0.0580373
LEMD1_ENST00000495594	67	0.708058	0.233807	0.0580373
CKS1B_ENST00000368436	67	0.751175	0.190694	0.0580373
NSD1_ENST00000511258	67	0.693134	0.25039	0.0563791
DEFB103A	67	0.711373	0.232149	0.0563791
DEFB103B	67	0.711373	0.232149	0.0563791
CENPW_ENST00000368326	67	0.711375	0.233807	0.0547209
ABRACL_ENST00000461027	67	0.7263	0.220542	0.0530627
SNRPF_ENST00000553192	67	0.742885	0.20396	0.0530627
RPL38_ENST00000584577	67	0.726297	0.2222	0.0514045
RPS29	67	0.741222	0.207276	0.0514045
PTK2_ENST00000522950	67	0.729615	0.220542	0.0497463
ZNF823_ENST00000440527	67	0.74454	0.205618	0.0497463
GNG13	67	0.754491	0.197327	0.0480881
PSMA6_ENST00000628955	67	0.727955	0.225516	0.0464299
FIGNL1_ENST00000435566	67	0.741221	0.212251	0.0464299
BBIP1_ENST00000423273	67	0.734594	0.218884	0.0464299
LSM8_ENST00000424702	67	0.721324	0.233807	0.0447716
GCHFR_ENST00000558467	67	0.727958	0.227175	0.0447716
GCHFR_ENST00000559932	67	0.727958	0.227175	0.0447716
TRIM37_ENST00000625984	67	0.742882	0.212251	0.0447716
FOXP2_ENST00000462331	67	0.751175	0.205618	0.0431134
CDH13_ENST00000567445	67	0.731273	0.225516	0.0431134
KARS_ENST00000568378	67	0.722981	0.233807	0.0431134
PCDHB12_ENST00000622978	67	0.736249	0.2222	0.0414552
POLR2L	67	0.713033	0.245415	0.0414552
ZNF627_ENST00000588174	67	0.747855	0.210593	0.0414552
SMIM20	67	0.72464	0.235466	0.039797
AL139353.1	67	0.718007	0.242099	0.039797
CCND1_ENST00000536559	67	0.729619	0.230491	0.039797
DNAJC4_ENST00000355040	67	0.694791	0.266972	0.0381388
DNAJC4_ENST00000628077	67	0.694791	0.266972	0.0381388
DYNLL1_ENST00000548214	67	0.742884	0.218884	0.0381388
DYNLL1_ENST00000550178	67	0.742884	0.218884	0.0381388
DYNLL1_ENST00000550845	67	0.742884	0.218884	0.0381388
CLMN_ENST00000556441	67	0.754494	0.207276	0.0381388
C12orf45_ENST00000280749	67	0.711373	0.252048	0.0364806
C19orf54_ENST00000598485	67	0.737904	0.225516	0.0364806
MYCT1_ENST00000529453	67	0.741222	0.223858	0.0348224
PAIP2_ENST00000511706	67	0.789312	0.17577	0.0348224
CKLF_ENST00000362093	67	0.741222	0.223858	0.0348224
NDUFS3_ENST00000529276	67	0.678209	0.293503	0.0281896
WDR7_ENST00000589935	67	0.72796	0.245415	0.0265313
CREBZF_ENST00000534224	67	0.70474	0.26863	0.0265313
SNAPC5_ENST00000566658	67	0.71469	0.260339	0.0248731
GLTP_ENST00000617457	67	0.726299	0.25039	0.0232149
CMC4	68	0.728688	0.194425	0.0767897
CMC4_ENST00000369479	68	0.728688	0.194425	0.0767897
MT3	68	0.745025	0.191157	0.0637191
PPP2R5C_ENST00000556260	68	0.718885	0.217299	0.0637191
CCDC179	68	0.727054	0.217299	0.05555
SNRPG_ENST00000413456	68	0.745032	0.20096	0.0539162
RANBP6_ENST00000485372	68	0.720519	0.225468	0.0539162
SPATA8_ENST00000558553	68	0.709081	0.238538	0.0522824
CYLC1_ENST00000621735	68	0.727053	0.220566	0.0522824
RPL37A_ENST00000456586	68	0.735225	0.214031	0.0506485
DEFB1	68	0.725421	0.223834	0.0506485
GNPTAB_ENST00000549165	68	0.727053	0.223834	0.0490147
MRPS18C_ENST00000507349	68	0.713982	0.236904	0.0490147
ZNF268_ENST00000536899	68	0.743394	0.209129	0.0473809
SNAPC5_ENST00000307979	68	0.731956	0.220566	0.0473809
ZNF738_ENST00000594245	68	0.709082	0.24344	0.0473809
ETNK2_ENST00000367197	68	0.743393	0.210763	0.0457471
VPS8_ENST00000628962	68	0.758099	0.196059	0.0457471
CCL4L2_ENST00000613173	68	0.723788	0.232003	0.0441132
SMIM11A_ENST00000399299	68	0.725421	0.230369	0.0441132
SMIM11B_ENST00000612624	68	0.725421	0.230369	0.0441132
PCP4L1	68	0.741757	0.215665	0.0424794
MT1G_ENST00000568675	68	0.723785	0.233637	0.0424794
GNG10	68	0.720519	0.238538	0.0408456
SDHAF3_ENST00000360382	68	0.727054	0.232003	0.0408456
LITAF_ENST00000572255	68	0.730322	0.228735	0.0408456
VAMP2_ENST00000404970	68	0.743394	0.215665	0.0408456
ZNF677_ENST00000601413	68	0.751562	0.207496	0.0408456
ZNF677_ENST00000601828	68	0.751562	0.207496	0.0408456
AC083800.1	68	0.73849	0.2222	0.0392118
ATOX1	68	0.730324	0.230369	0.0392118
ATOX1_ENST00000313115	68	0.730324	0.230369	0.0392118
ATOX1_ENST00000522710	68	0.730324	0.230369	0.0392118
NREP_ENST00000257435	68	0.743393	0.217299	0.0392118
NREP_ENST00000379671	68	0.743393	0.217299	0.0392118
NREP_ENST00000419114	68	0.743393	0.217299	0.0392118
NREP_ENST00000446294	68	0.743393	0.217299	0.0392118
NREP_ENST00000447165	68	0.743393	0.217299	0.0392118
NREP_ENST00000450761	68	0.743393	0.217299	0.0392118
NREP_ENST00000453526	68	0.743393	0.217299	0.0392118
NREP_ENST00000455559	68	0.743393	0.217299	0.0392118
NREP_ENST00000508870	68	0.743393	0.217299	0.0392118
NREP_ENST00000509427	68	0.743393	0.217299	0.0392118
PARM1_ENST00000513238	68	0.71725	0.24344	0.0392118
GTF2A2_ENST00000396064	68	0.735222	0.225468	0.0392118
DNAL4_ENST00000406199	68	0.741762	0.218932	0.0392118
GNG7	68	0.727054	0.233637	0.0392118
MBP_ENST00000528160	68	0.727054	0.233637	0.0392118
NBDY	68	0.694376	0.267947	0.0375779
NBDY_ENST00000423617	68	0.694376	0.267947	0.0375779
NBDY_ENST00000637096	68	0.694376	0.267947	0.0375779
PET100_ENST00000601406	68	0.754831	0.207496	0.0375779
ZFR2_ENST00000591712	68	0.700912	0.263046	0.0359441
ZFR2_ENST00000592398	68	0.700912	0.263046	0.0359441
GNG5	68	0.722153	0.241806	0.0359441
GNG5_ENST00000370645	68	0.722153	0.241806	0.0359441
WDR6_ENST00000627177	68	0.722151	0.241806	0.0359441
C15orf40_ENST00000565712	68	0.707449	0.25651	0.0359441
ZNF365_ENST00000395249	68	0.730321	0.235271	0.0343103
SMIM10L1	68	0.707449	0.259778	0.0326765
RNF123_ENST00000629802	68	0.728688	0.240172	0.0310426
CHCHD7_ENST00000518801	68	0.730326	0.238538	0.0310426
CHCHD7_ENST00000521524	68	0.730326	0.238538	0.0310426
TROAP_ENST00000549275	68	0.722153	0.246707	0.0310426
ZNF814_ENST00000597832	68	0.723787	0.245074	0.0310426
SEC61G	68	0.761368	0.209129	0.0294088
SEC61G_ENST00000352861	68	0.761368	0.209129	0.0294088
SEC61G_ENST00000395535	68	0.761368	0.209129	0.0294088
SEC61G_ENST00000450622	68	0.761368	0.209129	0.0294088
RBM43_ENST00000409092	68	0.702546	0.267947	0.0294088
FAM220A_ENST00000578372	68	0.70745	0.267947	0.0245074
GGNBP2_ENST00000611219	68	0.702546	0.272849	0.0245074
FIZ1_ENST00000592585	68	0.722151	0.261412	0.0163382
RNF165_ENST00000588679	68	0.697644	0.287553	0.0147044
GEMIN6_ENST00000409011	69	0.719738	0.21737	0.0627957
MDM1_ENST00000393543	69	0.718126	0.22059	0.0611855
FURIN_ENST00000640725	69	0.702023	0.238301	0.0595754
CTRC_ENST00000375943	69	0.722961	0.21898	0.0579652
TMEM97_ENST00000336687	69	0.724568	0.21737	0.0579652
TMEM97_ENST00000583381	69	0.724568	0.21737	0.0579652
C9orf85_ENST00000486911	69	0.75838	0.183557	0.0579652
DEFB114	69	0.75033	0.193217	0.0563551
EFCAB10_ENST00000490493	69	0.758386	0.189997	0.0515246
CDK7_ENST00000629350	69	0.726178	0.2222	0.0515246
GNGT2	69	0.751941	0.198048	0.0499145
GNGT2_ENST00000300406	69	0.751941	0.198048	0.0499145
GNGT2_ENST00000507680	69	0.751941	0.198048	0.0499145
GNGT2_ENST00000511673	69	0.751941	0.198048	0.0499145
GNGT2_ENST00000515635	69	0.751941	0.198048	0.0499145
ZNF791_ENST00000446165	69	0.726178	0.22381	0.0499145
ZNF81_ENST00000334937	69	0.74228	0.207709	0.0499145
ATP5ME	69	0.716516	0.235081	0.0483043
AKAIN1_ENST00000434239	69	0.747109	0.204488	0.0483043
IER3IP1_ENST00000639845	69	0.710078	0.241522	0.0483043
ZNF606_ENST00000547121	69	0.716517	0.236691	0.0466942
ZNF606_ENST00000547828	69	0.716517	0.236691	0.0466942
PPP4R2_ENST00000495566	69	0.724568	0.228641	0.0466942
RAD21_ENST00000517749	69	0.734228	0.22059	0.0450841
ZFP36L1_ENST00000555997	69	0.713296	0.241522	0.0450841
ANKMY2_ENST00000627859	69	0.719736	0.236691	0.0434739
SKIV2L_ENST00000628157	69	0.710077	0.246352	0.0434739
FBXO16_ENST00000519471	69	0.750335	0.206099	0.0434739
COX5A_ENST00000568517	69	0.718126	0.238301	0.0434739
ZNF616_ENST00000596290	69	0.73423	0.2222	0.0434739
XAGE1A_ENST00000375600	69	0.743891	0.214149	0.0418638
XAGE1B_ENST00000375613	69	0.743891	0.214149	0.0418638
PTP4A2_ENST00000627328	69	0.735839	0.22381	0.0402536
C9orf50_ENST00000619117	69	0.716516	0.243132	0.0402536
PPP2R5C_ENST00000557714	69	0.735839	0.22381	0.0402536
FAM173B_ENST00000280330	69	0.745501	0.215759	0.0386435
MAPKBP1_ENST00000627631	69	0.724567	0.236691	0.0386435
CTBP1_ENST00000629223	69	0.708464	0.254403	0.0370333
SIX5_ENST00000560168	69	0.693974	0.268894	0.0370333
PTCD3_ENST00000627371	69	0.706855	0.257623	0.0354232
SETD7_ENST00000406354	69	0.742287	0.2222	0.0354232
CYREN_ENST00000430372	69	0.7133	0.251183	0.0354232
CYREN_ENST00000617987	69	0.729401	0.235081	0.0354232
FBXL12_ENST00000586469	69	0.703635	0.260843	0.0354232
EMP1_ENST00000537612	69	0.74711	0.21898	0.033813
GNG14_ENST00000640117	69	0.751942	0.214149	0.033813
RPL28_ENST00000428193	69	0.735839	0.230251	0.033813
LY6G6C_ENST00000495859	69	0.722957	0.244742	0.0322029
RPS28	69	0.716517	0.251183	0.0322029
SLC25A24_ENST00000569674	69	0.714906	0.256013	0.0289826
PDCD6_ENST00000505221	69	0.722957	0.247962	0.0289826
COX8A	69	0.687535	0.283386	0.0289826
FAM57A_ENST00000572018	69	0.713297	0.268894	0.0177116
SEM1_ENST00000248566	70	0.760244	0.174586	0.0650729
RIPPLY2_ENST00000369687	70	0.73485	0.203154	0.0618986
C2orf73_ENST00000615983	70	0.714216	0.228549	0.0571371
MDM2_ENST00000544561	70	0.726917	0.215851	0.0571371
CPLX2_ENST00000512824	70	0.749139	0.198393	0.0523757
DEFB131A	70	0.755483	0.192044	0.0523757
SMIM4	70	0.722154	0.225374	0.0523757
DEFB131B	70	0.750721	0.196806	0.0523757
TPM1_ENST00000560445	70	0.750723	0.196806	0.0523757
ECHDC1_ENST00000528402	70	0.723741	0.225374	0.0507886
RPL38	70	0.723739	0.225374	0.0507886
RPL38_ENST00000439590	70	0.723739	0.225374	0.0507886
RPL38_ENST00000533498	70	0.723739	0.225374	0.0507886
ZNF175_ENST00000596504	70	0.736437	0.214264	0.0492014
TCAIM_ENST00000383746	70	0.753896	0.198393	0.0476143
TCAIM_ENST00000396078	70	0.753896	0.198393	0.0476143
CEP120_ENST00000515110	70	0.71739	0.236484	0.0460271
TSPO2_ENST00000373158	70	0.726917	0.226961	0.0460271
BBIP1_ENST00000436562	70	0.741204	0.212677	0.0460271
BBIP1_ENST00000447005	70	0.741204	0.212677	0.0460271
FTO_ENST00000640179	70	0.725329	0.228549	0.0460271
MT1B_ENST00000562399	70	0.709456	0.24442	0.0460271
CARD8_ENST00000519332	70	0.741197	0.212677	0.0460271
CARD8_ENST00000520007	70	0.741197	0.212677	0.0460271
CARD8_ENST00000522431	70	0.741197	0.212677	0.0460271
NDUFA1	70	0.736439	0.217439	0.0460271
ZNF326_ENST00000361911	70	0.7539	0.201567	0.04444
GLI3_ENST00000642432	70	0.736439	0.219026	0.04444
LYRM4_ENST00000480566	70	0.726914	0.228549	0.04444
PATE2_ENST00000436890	70	0.749136	0.206329	0.04444
AL022312.1	70	0.714216	0.241246	0.04444
PLA2G1B_ENST00000423423	70	0.728501	0.230136	0.0412657
ZFR2_ENST00000439086	70	0.718977	0.239659	0.0412657
DEC1_ENST00000614246	70	0.722153	0.236484	0.0412657
DEFB107A	70	0.749136	0.209503	0.0412657
DEFB107B	70	0.749136	0.209503	0.0412657
RERG_ENST00000537647	70	0.726914	0.231723	0.0412657
ACP1_ENST00000405233	70	0.707867	0.252356	0.0396786
NOP16_ENST00000616685	70	0.714216	0.246007	0.0396786
IKBIP_ENST00000393042	70	0.693583	0.26664	0.0396786
CMTM1_ENST00000529506	70	0.725327	0.234897	0.0396786
PBX1_ENST00000485769	70	0.755487	0.206329	0.0380914
ERGIC1_ENST00000519860	70	0.738023	0.223787	0.0380914
DEC1	70	0.733266	0.228549	0.0380914
RPL23A_ENST00000472628	70	0.744371	0.217439	0.0380914
RPL23A_ENST00000496182	70	0.744371	0.217439	0.0380914
ZNF761	70	0.733263	0.228549	0.0380914
HJV_ENST00000634927	70	0.71739	0.246007	0.0365043
MRPL53_ENST00000409710	70	0.691996	0.274576	0.03333
LEPROTL1_ENST00000518001	70	0.738023	0.228549	0.03333
VMO1_ENST00000354194	70	0.709457	0.257117	0.03333
KIF13A_ENST00000502704	70	0.717393	0.250769	0.0317429
PPP3R2_ENST00000636434	70	0.758659	0.209503	0.0317429
ARFGAP2_ENST00000629231	70	0.745959	0.2222	0.0317429
FXYD3_ENST00000605550	70	0.745961	0.2222	0.0317429
FAM72A_ENST00000468509	70	0.696759	0.272989	0.0301557
JPT2_ENST00000561516	70	0.744376	0.225374	0.0301557
GNG8	70	0.738026	0.234897	0.0269814
ASRGL1_ENST00000628829	70	0.717391	0.25553	0.0269814
TEX53	70	0.760247	0.215851	0.0238071
ERN1_ENST00000606895	70	0.657079	0.320603	0.02222
C5orf38_ENST00000457752	70	0.680886	0.301557	0.0174586
KRTAP6-1	71	0.686944	0.240977	0.0719803
SMIM31	71	0.749537	0.190904	0.059462
SMIM31_ENST00000515485	71	0.749537	0.190904	0.059462
ADAM10_ENST00000402627	71	0.702594	0.244107	0.0532028
ZNF669_ENST00000366500	71	0.749539	0.197163	0.0532028
LRRC70_ENST00000491184	71	0.707286	0.240977	0.051638
IL7_ENST00000639719	71	0.746408	0.201858	0.051638
SNURF	71	0.716675	0.233154	0.0500732
SNURF_ENST00000338327	71	0.716675	0.233154	0.0500732
DEFB124	71	0.715111	0.234718	0.0500732
ZNF844_ENST00000441304	71	0.755799	0.194034	0.0500732
UMAD1_ENST00000463725	71	0.722935	0.228459	0.0485085
METTL23_ENST00000586200	71	0.749538	0.201858	0.0485085
SUMO2_ENST00000314523	71	0.757362	0.194034	0.0485085
GNPTAB_ENST00000392919	71	0.726063	0.226894	0.0469437
SPTSSA	71	0.735462	0.217506	0.0469437
ATP5IF1_ENST00000497986	71	0.710417	0.242542	0.0469437
ARF4_ENST00000489843	71	0.719807	0.233154	0.0469437
RAB6B_ENST00000469959	71	0.737018	0.217506	0.0453789
C12orf73	71	0.721373	0.233154	0.0453789
C12orf73_ENST00000547945	71	0.721373	0.233154	0.0453789
C12orf73_ENST00000549478	71	0.721373	0.233154	0.0453789
C12orf73_ENST00000553183	71	0.721373	0.233154	0.0453789
TXNL4A_ENST00000585474	71	0.760494	0.194034	0.0453789
TXNL4A_ENST00000592837	71	0.760494	0.194034	0.0453789
TXNL4A_ENST00000592957	71	0.760494	0.194034	0.0453789
ERH_ENST00000555373	71	0.758928	0.200293	0.0406845
RNASEK_ENST00000552039	71	0.751101	0.208117	0.0406845
RNASEK_ENST00000570898	71	0.751101	0.208117	0.0406845
GTF2H5	71	0.749538	0.211246	0.0391197
PASK_ENST00000629419	71	0.722934	0.237848	0.0391197
TIMM10B_ENST00000530751	71	0.719807	0.240977	0.0391197
METTL23_ENST00000588302	71	0.746407	0.214376	0.0391197
MMP24OS	71	0.718239	0.244107	0.0375549
MMP24OS_ENST00000456790	71	0.718239	0.244107	0.0375549
RPS19_ENST00000221975	71	0.729196	0.233154	0.0375549
ZNF677_ENST00000598806	71	0.741713	0.220635	0.0375549
PNPT1_ENST00000625249	71	0.702592	0.26132	0.0359901
FNDC3B_ENST00000421757	71	0.744848	0.21907	0.0359901
FNDC3B_ENST00000423424	71	0.744848	0.21907	0.0359901
PIGY	71	0.72763	0.236283	0.0359901
ARPP19_ENST00000569723	71	0.740149	0.223765	0.0359901
CLPS_ENST00000616014	71	0.71511	0.250366	0.0344254
CRCP_ENST00000398684	71	0.744844	0.220635	0.0344254
GNG2	71	0.752668	0.212811	0.0344254
GNG2_ENST00000554736	71	0.752668	0.212811	0.0344254
GNG2_ENST00000555472	71	0.752668	0.212811	0.0344254
GNG2_ENST00000556752	71	0.752668	0.212811	0.0344254
GNG2_ENST00000556766	71	0.752668	0.212811	0.0344254
GNG2_ENST00000615906	71	0.752668	0.212811	0.0344254
NDUFA6_ENST00000470753	71	0.749539	0.215941	0.0344254
ZNF83_ENST00000601257	71	0.729194	0.236283	0.0344254
AC003002.2	71	0.722938	0.244107	0.0328606
EGR3_ENST00000519492	71	0.737021	0.231589	0.0312958
SLC25A48_ENST00000425402	71	0.721369	0.248801	0.029731
TINF2_ENST00000559019	71	0.693204	0.276968	0.029731
NDUFC2_ENST00000534029	71	0.71511	0.256625	0.0281662
PXMP4_ENST00000344022	71	0.702593	0.269144	0.0281662
DCTPP1_ENST00000567983	71	0.711982	0.26132	0.0266014
MARS_ENST00000630571	71	0.713545	0.26132	0.0250366
ZFP36_ENST00000594045	71	0.715111	0.259755	0.0250366
C19orf25_ENST00000588427	71	0.697897	0.278532	0.0234718
SSBP4_ENST00000599699	71	0.729199	0.255061	0.0156479
KRTAP19-5	72	0.686661	0.233001	0.0802389
SPRR2A	72	0.722151	0.214485	0.0632653
SPRR2D	72	0.723694	0.214485	0.0617222
SPRR2D_ENST00000360379	72	0.723694	0.214485	0.0617222
SPRR2D_ENST00000368756	72	0.723694	0.214485	0.0617222
SPRR2D_ENST00000368758	72	0.723694	0.214485	0.0617222
DEFB104A	72	0.719065	0.219114	0.0617222
DEFB104B	72	0.719065	0.219114	0.0617222
SPANXN1	72	0.753015	0.185167	0.0617222
SPANXN5	72	0.751472	0.18671	0.0617222
SPRR2B	72	0.725238	0.214485	0.0601792
SPRR2F	72	0.725238	0.214485	0.0601792
MRPS24_ENST00000418740	72	0.706721	0.234544	0.0586361
SPRR2E	72	0.728324	0.214485	0.0570931
SPRR2E_ENST00000368750	72	0.728324	0.214485	0.0570931
LYRM2_ENST00000520318	72	0.717522	0.225286	0.0570931
FRMD4A_ENST00000475141	72	0.722154	0.225286	0.0524639
GNG12	72	0.732954	0.214485	0.0524639
RPL37A_ENST00000600880	72	0.731414	0.217571	0.0509208
LGI1_ENST00000627699	72	0.715981	0.233001	0.0509208
RABGAP1L_ENST00000478442	72	0.763821	0.18671	0.0493778
RABGAP1L_ENST00000486220	72	0.763821	0.18671	0.0493778
VAMP3_ENST00000470357	72	0.73604	0.216028	0.0478347
CCDC178_ENST00000581852	72	0.759189	0.192882	0.0478347
GPX3_ENST00000614343	72	0.717524	0.236088	0.0462917
GBGT1_ENST00000372036	72	0.700549	0.253061	0.0462917
GBGT1_ENST00000644196	72	0.700549	0.253061	0.0462917
TEX30_ENST00000376022	72	0.72061	0.233001	0.0462917
APOC2_ENST00000585786	72	0.715981	0.237631	0.0462917
GRHL1_ENST00000480736	72	0.753015	0.20214	0.0447486
PQLC2L_ENST00000459838	72	0.726781	0.228372	0.0447486
EFCAB10_ENST00000469099	72	0.751474	0.203683	0.0447486
OR51E1_ENST00000530215	72	0.723697	0.231458	0.0447486
BRF2_ENST00000521170	72	0.723694	0.233001	0.0432056
GYPA_ENST00000643148	72	0.717524	0.240717	0.0416625
CD160_ENST00000584442	72	0.72061	0.239174	0.0401194
TMEM167A	72	0.734497	0.225286	0.0401194
EMC4_ENST00000557879	72	0.712893	0.246889	0.0401194
RNF157_ENST00000592271	72	0.732954	0.228372	0.0385764
TMEM182_ENST00000640575	72	0.731411	0.231458	0.0370333
AC022167.5	72	0.722153	0.240717	0.0370333
AC022167.5_ENST00000637237	72	0.722153	0.240717	0.0370333
BEAN1_ENST00000564819	72	0.722153	0.240717	0.0370333
PSMD5_ENST00000625444	72	0.703636	0.260776	0.0354903
PDLIM2_ENST00000443561	72	0.706722	0.259233	0.0339472
TOR2A_ENST00000463577	72	0.69129	0.274664	0.0339472
PPP1R14B_ENST00000542235	72	0.734499	0.233001	0.0324042
NDUFA3_ENST00000391762	72	0.728325	0.239174	0.0324042
C12orf76_ENST00000549724	72	0.699008	0.270035	0.0308611
CHST11_ENST00000546689	72	0.74839	0.220657	0.0308611
ZNF688_ENST00000563707	72	0.714438	0.25769	0.027775
C5orf46_ENST00000515291	72	0.729868	0.24226	0.027775
LAMTOR4_ENST00000474141	72	0.717524	0.254604	0.027775
BEST3_ENST00000266661	72	0.746846	0.225286	0.027775
BEST3_ENST00000551160	72	0.746846	0.225286	0.027775
YWHAH_ENST00000397492	72	0.723697	0.248432	0.027775
ZCCHC10_ENST00000504170	72	0.732954	0.240717	0.0262319
GLIPR2_ENST00000619700	72	0.736042	0.239174	0.0246889
COX8C	72	0.699007	0.276207	0.0246889
COA5_ENST00000409997	73	0.709216	0.225244	0.0654425
SPRR2G	73	0.725956	0.21459	0.0593548
GNG11	73	0.744221	0.196327	0.0593548
PSG6_ENST00000601833	73	0.700084	0.240463	0.0593548
SAXO1_ENST00000380530	73	0.730523	0.21459	0.054789
EPGN_ENST00000509145	73	0.725956	0.219156	0.054789
ZNF124_ENST00000472531	73	0.751832	0.194805	0.0532671
WFDC10B_ENST00000330523	73	0.73357	0.216112	0.0502233
ADCY10_ENST00000476818	73	0.757922	0.193284	0.0487014
SMG7_ENST00000638826	73	0.732047	0.219156	0.0487014
PET100	73	0.748788	0.202415	0.0487014
HOPX_ENST00000317745	73	0.722912	0.228288	0.0487014
HOPX_ENST00000337881	73	0.722912	0.228288	0.0487014
HOPX_ENST00000381255	73	0.722912	0.228288	0.0487014
HOPX_ENST00000503639	73	0.722912	0.228288	0.0487014
HOPX_ENST00000508121	73	0.722912	0.228288	0.0487014
HOPX_ENST00000553379	73	0.722912	0.228288	0.0487014
HOPX_ENST00000555760	73	0.722912	0.228288	0.0487014
HOPX_ENST00000556376	73	0.722912	0.228288	0.0487014
HOPX_ENST00000556614	73	0.722912	0.228288	0.0487014
LST1_ENST00000376086	73	0.725956	0.225244	0.0487014
SINHCAF_ENST00000539409	73	0.739653	0.211547	0.0487014
SINHCAF_ENST00000542983	73	0.739653	0.211547	0.0487014
ANKRD40CL_ENST00000502517	73	0.741175	0.211547	0.0471795
SMIM26_ENST00000608034	73	0.698566	0.25416	0.0471795
RAB5B_ENST00000628569	73	0.729001	0.225244	0.0456575
ETFA_ENST00000560726	73	0.73509	0.219156	0.0456575
MT2A_ENST00000561491	73	0.725956	0.228288	0.0456575
IQSEC2_ENST00000639161	73	0.745742	0.210025	0.0441356
ATOX1_ENST00000521264	73	0.725959	0.231332	0.0426137
GCHFR_ENST00000559445	73	0.727482	0.22981	0.0426137
UBL5	73	0.747264	0.210025	0.0426137
UBL5_ENST00000586895	73	0.747264	0.210025	0.0426137
UBL5_ENST00000590068	73	0.747264	0.210025	0.0426137
RGS5_ENST00000527988	73	0.764008	0.193284	0.0426137
RGS5_ENST00000618415	73	0.764008	0.193284	0.0426137
TEN1_ENST00000588202	73	0.735092	0.2222	0.0426137
OTUB2_ENST00000553723	73	0.742697	0.216112	0.0410918
CSAG1_ENST00000370291	73	0.706173	0.252638	0.0410918
WFDC2_ENST00000342873	73	0.741177	0.217634	0.0410918
APOC4_ENST00000591600	73	0.722915	0.237419	0.0395699
LY6E_ENST00000520531	73	0.722914	0.237419	0.0395699
COTL1_ENST00000564057	73	0.748785	0.211547	0.0395699
PTP4A2_ENST00000470404	73	0.733567	0.228288	0.0380479
ZNF451_ENST00000370702	73	0.724436	0.237419	0.0380479
BAALC_ENST00000330955	73	0.724434	0.237419	0.0380479
BATF_ENST00000555504	73	0.754873	0.206981	0.0380479
GABRA2_ENST00000507460	73	0.735089	0.228288	0.036526
CLDN10_ENST00000376855	73	0.730525	0.232853	0.036526
GMFG_ENST00000594700	73	0.75031	0.213068	0.036526
ZNF415_ENST00000595813	73	0.739658	0.223722	0.036526
ZNF415_ENST00000597503	73	0.739658	0.223722	0.036526
ZNF415_ENST00000597748	73	0.739658	0.223722	0.036526
TMEM144_ENST00000509278	73	0.760962	0.205459	0.0334822
DEFB108B	73	0.75183	0.21459	0.0334822
POLR2J3_ENST00000513438	73	0.730522	0.237419	0.0319603
SRSF1_ENST00000585096	73	0.73661	0.231332	0.0319603
NDUFA3_ENST00000471292	73	0.721392	0.248073	0.0304384
SQSTM1_ENST00000626660	73	0.707693	0.26177	0.0304384
MBP_ENST00000354542	73	0.725959	0.243507	0.0304384
CENPM_ENST00000404067	73	0.735088	0.235897	0.0289164
NAA38_ENST00000575208	73	0.721393	0.25416	0.0243507
CENPT_ENST00000626059	73	0.698562	0.284599	0.0167411
COA5	74	0.713143	0.213192	0.0735662
ERRFI1_ENST00000469499	74	0.729661	0.214693	0.05555
TSTD1_ENST00000368024	74	0.723655	0.220699	0.05555
CHST9_ENST00000580774	74	0.719153	0.225203	0.05555
TSHZ2_ENST00000626626	74	0.741673	0.204184	0.0540486
ANAPC13	74	0.744673	0.202682	0.0525473
ANAPC13_ENST00000354910	74	0.744673	0.202682	0.0525473
ANAPC13_ENST00000511751	74	0.744673	0.202682	0.0525473
ANAPC13_ENST00000514612	74	0.744673	0.202682	0.0525473
RPL37_ENST00000509877	74	0.731161	0.216195	0.0525473
SMIM15	74	0.735665	0.211691	0.0525473
SMIM15_ENST00000507416	74	0.735665	0.211691	0.0525473
GNGT1	74	0.738669	0.208688	0.0525473
GNGT1_ENST00000429473	74	0.738669	0.208688	0.0525473
DERL2_ENST00000572834	74	0.732662	0.214693	0.0525473
C3orf67_ENST00000491845	74	0.74017	0.208688	0.0510459
ADSSL1_ENST00000555674	74	0.722153	0.229707	0.0480432
ATG12_ENST00000500945	74	0.699631	0.253728	0.0465419
PRKN_ENST00000612485	74	0.72065	0.232709	0.0465419
CYP3A43_ENST00000631161	74	0.729661	0.223701	0.0465419
LTBR_ENST00000543190	74	0.731161	0.2222	0.0465419
CMC2_ENST00000562713	74	0.749176	0.204184	0.0465419
CMC2_ENST00000565925	74	0.749176	0.204184	0.0465419
LYPD6B_ENST00000450639	74	0.747674	0.207186	0.0450405
FAM120AOS_ENST00000423591	74	0.714645	0.240216	0.0450405
GTF2A2_ENST00000484743	74	0.74317	0.211691	0.0450405
ZNF616_ENST00000330123	74	0.732664	0.2222	0.0450405
ZNF616_ENST00000597013	74	0.732664	0.2222	0.0450405
IQSEC2_ENST00000498281	74	0.746174	0.210189	0.0435392
IFT20_ENST00000588477	74	0.747676	0.208688	0.0435392
CTAGE1_ENST00000525417	74	0.728157	0.228205	0.0435392
TMEM167B	74	0.717649	0.240216	0.0420378
MTFP1_ENST00000629597	74	0.704135	0.253728	0.0420378
HSPB11_ENST00000371376	74	0.759686	0.198178	0.0420378
BIRC5_ENST00000590449	74	0.759688	0.19968	0.0405365
HSBP1L1	74	0.743176	0.216195	0.0405365
PPP1R11_ENST00000376758	74	0.722153	0.240216	0.0375338
PPP1R11_ENST00000376763	74	0.722153	0.240216	0.0375338
PPP1R11_ENST00000376765	74	0.722153	0.240216	0.0375338
PPP1R11_ENST00000376769	74	0.722153	0.240216	0.0375338
PPP1R11_ENST00000376773	74	0.722153	0.240216	0.0375338
INIP_ENST00000374236	74	0.735664	0.226704	0.0375338
TMEM258_ENST00000543510	74	0.723655	0.238715	0.0375338
TFF3_ENST00000291525	74	0.725154	0.237214	0.0375338
ERVK3-1_ENST00000427361	74	0.723657	0.240216	0.0360324
ACSM5_ENST00000575070	74	0.719149	0.247723	0.0330297
VAMP8_ENST00000432071	74	0.74167	0.225203	0.0330297
NDUFAF8	74	0.704135	0.262736	0.0330297
POLR2F_ENST00000460648	74	0.761191	0.205685	0.0330297
DIAPH1_ENST00000448451	74	0.714646	0.253728	0.0315284
DIAPH1_ENST00000468119	74	0.714646	0.253728	0.0315284
DIAPH1_ENST00000643312	74	0.714646	0.253728	0.0315284
GOLT1B_ENST00000542038	74	0.732664	0.235712	0.0315284
TMEM107_ENST00000431792	74	0.71915	0.250726	0.030027
CMTM5_ENST00000342473	74	0.731161	0.241718	0.0270243
TOMM6	74	0.734164	0.241718	0.0240216
TOMM6_ENST00000398881	74	0.734164	0.241718	0.0240216
SYNGR4_ENST00000595322	74	0.732661	0.249224	0.0180162
BLOC1S6_ENST00000562384	75	0.748079	0.182204	0.0696227
BLOC1S6_ENST00000565409	75	0.748079	0.182204	0.0696227
BLOC1S6_ENST00000567461	75	0.748079	0.182204	0.0696227
BLOC1S6_ENST00000568816	75	0.748079	0.182204	0.0696227
ELSPBP1_ENST00000597519	75	0.73178	0.19998	0.0681413
C8orf89_ENST00000613105	75	0.743632	0.194055	0.062216
AC001226.2_ENST00000638101	75	0.736225	0.208868	0.0548093
ATP5MPL	75	0.743636	0.201461	0.0548093
RBBP8_ENST00000581687	75	0.736225	0.208868	0.0548093
NRXN1_ENST00000630656	75	0.740669	0.205905	0.053328
KRAS_ENST00000557334	75	0.742152	0.204424	0.053328
STARD6_ENST00000577499	75	0.718449	0.228125	0.053328
STARD6_ENST00000584040	75	0.718449	0.228125	0.053328
RPL37A_ENST00000446558	75	0.736229	0.213312	0.0503653
SERF1A_ENST00000504458	75	0.731781	0.219237	0.048884
SERF1B_ENST00000503931	75	0.731781	0.219237	0.048884
CLVS1_ENST00000518592	75	0.72882	0.2222	0.048884
SPATS2_ENST00000547865	75	0.709561	0.241457	0.048884
C6orf48	75	0.733263	0.219237	0.0474027
C6orf48_ENST00000375633	75	0.733263	0.219237	0.0474027
C6orf48_ENST00000375635	75	0.733263	0.219237	0.0474027
C6orf48_ENST00000375638	75	0.733263	0.219237	0.0474027
C6orf48_ENST00000375639	75	0.733263	0.219237	0.0474027
C6orf48_ENST00000375641	75	0.733263	0.219237	0.0474027
C6orf48_ENST00000375642	75	0.733263	0.219237	0.0474027
C6orf48_ENST00000395788	75	0.733263	0.219237	0.0474027
C6orf48_ENST00000395789	75	0.733263	0.219237	0.0474027
C6orf48_ENST00000614363	75	0.733263	0.219237	0.0474027
MAP1LC3B_ENST00000565788	75	0.7303	0.2222	0.0474027
ZNF345_ENST00000526123	75	0.754004	0.198499	0.0474027
ZNF611_ENST00000600943	75	0.734745	0.217756	0.0474027
SNRPD1_ENST00000582475	75	0.691784	0.262196	0.0459213
ZNF544_ENST00000594384	75	0.708081	0.245901	0.0459213
ZNF544_ENST00000596825	75	0.708081	0.245901	0.0459213
ZNF544_ENST00000599227	75	0.708081	0.245901	0.0459213
BLOC1S1_ENST00000547076	75	0.740671	0.214793	0.04444
BLOC1S1_ENST00000548556	75	0.740671	0.214793	0.04444
CHTF8_ENST00000523421	75	0.714005	0.241457	0.04444
PLD4_ENST00000553861	75	0.719929	0.235532	0.04444
YPEL3_ENST00000566134	75	0.73178	0.223681	0.04444
BRK1	75	0.736225	0.219237	0.04444
ASXL1_ENST00000497249	75	0.725859	0.229607	0.04444
SKA2_ENST00000437036	75	0.721412	0.235532	0.0429587
NSL1_ENST00000366978	75	0.73178	0.226644	0.0414773
CFAP299_ENST00000621014	75	0.746592	0.211831	0.0414773
ZNF451_ENST00000370710	75	0.727336	0.231088	0.0414773
LSM8_ENST00000422760	75	0.725855	0.232569	0.0414773
ZNF415_ENST00000600574	75	0.746595	0.211831	0.0414773
TRAPPC2L_ENST00000625770	75	0.731783	0.228125	0.039996
ATP5IF1_ENST00000468425	75	0.70808	0.253308	0.0385147
COX6C	75	0.739192	0.223681	0.0370333
COX6C_ENST00000297564	75	0.739192	0.223681	0.0370333
COX6C_ENST00000517682	75	0.739192	0.223681	0.0370333
COX6C_ENST00000518171	75	0.739192	0.223681	0.0370333
COX6C_ENST00000520271	75	0.739192	0.223681	0.0370333
COX6C_ENST00000522940	75	0.739192	0.223681	0.0370333
COX6C_ENST00000523016	75	0.739192	0.223681	0.0370333
COX6C_ENST00000524245	75	0.739192	0.223681	0.0370333
TUBB8_ENST00000562809	75	0.700672	0.262196	0.0370333
DCN_ENST00000456569	75	0.724375	0.238495	0.0370333
GNG4	75	0.74956	0.216275	0.0340707
GNG4_ENST00000366597	75	0.74956	0.216275	0.0340707
GNG4_ENST00000366598	75	0.74956	0.216275	0.0340707
GNG4_ENST00000450593	75	0.74956	0.216275	0.0340707
GNG4_ENST00000484517	75	0.74956	0.216275	0.0340707
GNG3	75	0.748079	0.217756	0.0340707
C17orf58_ENST00000334461	75	0.731783	0.234051	0.0340707
LITAF_ENST00000571459	75	0.705119	0.262196	0.0325893
FAM236A_ENST00000593662	75	0.715485	0.251827	0.0325893
FAU_ENST00000434372	75	0.70808	0.260715	0.031108
FAU_ENST00000529259	75	0.70808	0.260715	0.031108
FAM236C_ENST00000636532	75	0.719929	0.248864	0.031108
FAM236D_ENST00000458170	75	0.719929	0.248864	0.031108
AL355102.2	75	0.711043	0.259233	0.0296267
TMUB2_ENST00000589184	75	0.718448	0.253308	0.0281453
SMIM7_ENST00000487416	75	0.752524	0.219237	0.0281453
SPAAR	75	0.734744	0.242939	0.02222
SPAAR_ENST00000636776	75	0.734744	0.242939	0.02222
APOPT1_ENST00000476323	76	0.738234	0.200272	0.0613974
SPTSSB	76	0.738234	0.203196	0.0584737
SPTSSB_ENST00000497137	76	0.738234	0.203196	0.0584737
SPTSSB_ENST00000620149	76	0.738234	0.203196	0.0584737
ZNF816_ENST00000438970	76	0.748468	0.194425	0.0570118
ZNF706	76	0.74408	0.200272	0.05555
ZNF706_ENST00000311212	76	0.74408	0.200272	0.05555
ZNF706_ENST00000517844	76	0.74408	0.200272	0.05555
ZNF706_ENST00000518336	76	0.74408	0.200272	0.05555
ZNF706_ENST00000519882	76	0.74408	0.200272	0.05555
ZNF706_ENST00000520984	76	0.74408	0.200272	0.05555
ZNF706_ENST00000521272	76	0.74408	0.200272	0.05555
DEFB121	76	0.708996	0.235357	0.05555
CMC1_ENST00000423894	76	0.745545	0.200272	0.0540882
ZNF678_ENST00000608949	76	0.732386	0.213429	0.0540882
UGP2_ENST00000640075	76	0.727999	0.217814	0.0540882
AKAIN1	76	0.727999	0.217814	0.0540882
ZFP1_ENST00000464850	76	0.738236	0.207582	0.0540882
ZFP1_ENST00000567481	76	0.738236	0.207582	0.0540882
ZBTB8OS_ENST00000341885	76	0.74262	0.204658	0.0526263
SPTY2D1OS	76	0.733853	0.213429	0.0526263
UQCRB_ENST00000517523	76	0.748467	0.198811	0.0526263
SNRPG_ENST00000272348	76	0.748471	0.200272	0.0511645
SUMO1_ENST00000392244	76	0.754316	0.194425	0.0511645
EFCAB10_ENST00000460135	76	0.751389	0.197349	0.0511645
ZNF701_ENST00000611267	76	0.749928	0.200272	0.0497026
NDUFC1	76	0.701686	0.249975	0.0482408
NDUFC1_ENST00000394223	76	0.701686	0.249975	0.0482408
NDUFC1_ENST00000394228	76	0.701686	0.249975	0.0482408
NDUFC1_ENST00000505036	76	0.701686	0.249975	0.0482408
NDUFC1_ENST00000539002	76	0.701686	0.249975	0.0482408
NDUFC1_ENST00000539387	76	0.701686	0.249975	0.0482408
TRIAP1	76	0.767471	0.184192	0.0482408
UMAD1_ENST00000482067	76	0.741158	0.211967	0.0467789
MRPL51_ENST00000537701	76	0.748467	0.204658	0.0467789
MRPL51_ENST00000538814	76	0.748467	0.204658	0.0467789
MRPL51_ENST00000543164	76	0.748467	0.204658	0.0467789
MRPL51_ENST00000543959	76	0.748467	0.204658	0.0467789
C18orf32	76	0.742618	0.210505	0.0467789
C18orf32_ENST00000318240	76	0.742618	0.210505	0.0467789
C18orf32_ENST00000582392	76	0.742618	0.210505	0.0467789
HHLA3_ENST00000361764	76	0.728001	0.226586	0.0453171
SUPT4H1_ENST00000577396	76	0.728003	0.226586	0.0453171
ELOF1_ENST00000589171	76	0.741159	0.213429	0.0453171
PKIA	76	0.732384	0.223662	0.0438553
PKIA_ENST00000352966	76	0.732384	0.223662	0.0438553
PKIA_ENST00000518467	76	0.732384	0.223662	0.0438553
CHTOP_ENST00000614256	76	0.730928	0.226586	0.0423934
IKBKB_ENST00000518983	76	0.719229	0.23828	0.0423934
PLEKHA5_ENST00000540972	76	0.717766	0.239742	0.0423934
TAC4_ENST00000352793	76	0.716307	0.241204	0.0423934
ATP5MG_ENST00000524422	76	0.723613	0.235357	0.0409316
SYNGR3_ENST00000562045	76	0.673911	0.285059	0.0409316
LTO1_ENST00000542341	76	0.754314	0.204658	0.0409316
TMEM170A_ENST00000566980	76	0.700225	0.258746	0.0409316
HFE_ENST00000352392	76	0.697303	0.263132	0.0394697
ADIRF	76	0.729462	0.230971	0.0394697
ABCC3_ENST00000515707	76	0.713382	0.247051	0.0394697
GOSR2_ENST00000639031	76	0.745542	0.214891	0.0394697
KANTR	76	0.719228	0.241204	0.0394697
ZNF586_ENST00000598183	76	0.729462	0.230971	0.0394697
H2AFV_ENST00000437072	76	0.714842	0.247051	0.0380079
NDUFA2_ENST00000512088	76	0.719228	0.242666	0.0380079
C12orf76_ENST00000547573	76	0.688529	0.273364	0.0380079
C12orf76_ENST00000551185	76	0.688529	0.273364	0.0380079
STX3_ENST00000530221	76	0.742622	0.219276	0.0380079
TTC39C_ENST00000584250	76	0.716305	0.245589	0.0380079
COX7A2_ENST00000472311	76	0.754314	0.209043	0.0365461
SMIM8_ENST00000608525	76	0.744083	0.219276	0.0365461
VPS37A_ENST00000521005	76	0.71338	0.249975	0.0365461
PKIG	76	0.729463	0.233895	0.0365461
PKIG_ENST00000349959	76	0.729463	0.233895	0.0365461
PKIG_ENST00000372886	76	0.729463	0.233895	0.0365461
PKIG_ENST00000372891	76	0.729463	0.233895	0.0365461
PKIG_ENST00000372892	76	0.729463	0.233895	0.0365461
PKIG_ENST00000372894	76	0.729463	0.233895	0.0365461
POLR2J3_ENST00000511313	76	0.742617	0.2222	0.0350842
SH2D1A_ENST00000477673	76	0.726537	0.23828	0.0350842
POLR2F_ENST00000488684	76	0.752851	0.213429	0.0336224
HSBP1	76	0.767474	0.200272	0.0321605
HSBP1_ENST00000570259	76	0.767474	0.200272	0.0321605
EHHADH_ENST00000440662	76	0.722151	0.247051	0.0306987
GLI4_ENST00000344692	76	0.725075	0.244128	0.0306987
LZTS1_ENST00000616228	76	0.744082	0.225124	0.0306987
WFDC2_ENST00000339946	76	0.729462	0.239742	0.0306987
HES2_ENST00000377836	76	0.708995	0.26167	0.0292368
HES2_ENST00000377837	76	0.708995	0.26167	0.0292368
CD99_ENST00000381180	76	0.701686	0.268979	0.0292368
ENHO	76	0.722151	0.249975	0.027775
SYS1_ENST00000426004	76	0.716309	0.255822	0.027775
C16orf74	76	0.761626	0.214891	0.0233895
C16orf74_ENST00000602719	76	0.770397	0.20612	0.0233895
PSMG4_ENST00000451246	76	0.722154	0.255822	0.0219276
ARTN_ENST00000472435	76	0.685605	0.295292	0.0190039
ARTN_ENST00000479128	76	0.685605	0.295292	0.0190039
MARCH6_ENST00000640713	77	0.740187	0.193343	0.0663714
LRRTM2_ENST00000521094	77	0.734419	0.200557	0.0649286
SUMO1_ENST00000409712	77	0.744518	0.1919	0.0634857
EPPIN_ENST00000409554	77	0.737301	0.202	0.0606
NDUFA5_ENST00000618945	77	0.728645	0.2121	0.0591571
HMGN3_ENST00000275036	77	0.717101	0.225086	0.0577143
FAM240A_ENST00000640551	77	0.73153	0.2121	0.0562714
CENPS-CORT_ENST00000470413	77	0.75029	0.194786	0.0548286
ZNF124_ENST00000491356	77	0.745961	0.199114	0.0548286
LYRM2_ENST00000520441	77	0.71133	0.233743	0.0548286
THAP6_ENST00000504190	77	0.748844	0.196229	0.0548286
CBWD1_ENST00000382389	77	0.715658	0.229414	0.0548286
ATP5MPL_ENST00000553430	77	0.747405	0.197671	0.0548286
RPL36A-HNRNPH2_ENST00000409338	77	0.73153	0.213543	0.0548286
ICA1L_ENST00000418208	77	0.738745	0.207771	0.0533857
DEFB135	77	0.715658	0.230857	0.0533857
SCAF11_ENST00000395454	77	0.757505	0.189014	0.0533857
SVIP	77	0.71133	0.235186	0.0533857
SCAF11_ENST00000395453	77	0.756062	0.1919	0.0519429
ZNF267_ENST00000394846	77	0.73586	0.213543	0.0505
ZNF675_ENST00000599168	77	0.731531	0.217871	0.0505
MSMB_ENST00000581478	77	0.715661	0.235186	0.0490571
ZNF726_ENST00000531821	77	0.744519	0.206329	0.0490571
FTCDNL1_ENST00000416668	77	0.718544	0.233743	0.0476143
MGST2_ENST00000506797	77	0.707001	0.245286	0.0476143
SS18L2	77	0.738745	0.213543	0.0476143
SS18L2_ENST00000011691	77	0.738745	0.213543	0.0476143
AL353572.3	77	0.740187	0.2121	0.0476143
ZNF724_ENST00000597037	77	0.745964	0.206329	0.0476143
CRIP1	77	0.740188	0.213543	0.0461714
CRIP1_ENST00000392531	77	0.740188	0.213543	0.0461714
CRIP1_ENST00000409393	77	0.740188	0.213543	0.0461714
OARD1_ENST00000464633	77	0.74019	0.213543	0.0461714
OARD1_ENST00000482515	77	0.74019	0.213543	0.0461714
CLEC7A_ENST00000310002	77	0.721431	0.2323	0.0461714
DNAL1_ENST00000311089	77	0.747403	0.206329	0.0461714
ATP6V1G2_ENST00000483251	77	0.737305	0.217871	0.0447286
PTS_ENST00000524931	77	0.754621	0.202	0.0432857
PYM1_ENST00000454792	77	0.718548	0.238071	0.0432857
[truncated: 54,432 more rows]
