# Supplementary material for: Use of signals of positive and negative selection to distinguish cancer genes and passenger genes
Source: eLife. 2021 Jan 11;10:e59629. doi: 10.7554/eLife.59629 (PMC7877913; doi:10.7554/eLife.59629)
Supplement: Supplementary file 24. [file elife-59629-supp24.xlsx]

## Sheet: Supplementary file 24 CA
		Number of substitutions
Wild type amino acid	Wild type codon	Missense	Silent	Nonsense	fM	fS	fN
Ser	TCA	0	0	1	0	0	1
Tyr	TAC	0	0	1	0	0	1
Glu	GAA	0	0	1	0	0	1
Ser	TCG	0	1	1	0	0.5	0.5
Gly	GGA	1	0	1	0.5	0	0.5
Glu	GAG	1	0	1	0.5	0	0.5
Cys	TGC	1	0	1	0.5	0	0.5
Leu	TTA	0	0	0	0	0	0
Tyr	TAT	0	0	0	0	0	0
Trp	TGG	2	0	0	1	0	0
Arg	CGA	1	1	0	0.5	0.5	0
Leu	TTG	1	0	0	1	0	0
Arg	AGA	1	0	0	1	0	0
Gln	CAA	1	0	0	1	0	0
Gln	CAG	2	0	0	1	0	0
Lys	AAA	0	0	0	0	0	0
Lys	AAG	1	0	0	1	0	0
Cys	TGT	1	0	0	1	0	0
Leu	CTA	1	0	0	1	0	0
Leu	CTG	1	1	0	0.5	0.5	0
Arg	CGG	1	2	0	0.3333	0.6666	0
Leu	CTT	1	0	0	1	0	0
Leu	CTC	1	1	0	0.5	0.5	0
Val	GTT	1	0	0	1	0	0
Val	GTC	1	1	0	0.5	0.5	0
Val	GTA	1	0	0	1	0	0
Val	GTG	1	1	0	0.5	0.5	0
Ser	TCT	1	0	0	1	0	0
Ser	TCC	1	1	0	0.5	0.5	0
Pro	CCT	2	0	0	1	0	0
Pro	CCC	2	1	0	0.6666	0.3333	0
Pro	CCA	2	0	0	1	0	0
Pro	CCG	2	1	0	0.6666	0.3333	0
Thr	ACT	1	0	0	1	0	0
Thr	ACC	1	1	0	0.5	0.5	0
Thr	ACA	1	0	0	1	0	0
Thr	ACG	1	1	0	0.5	0.5	0
Ala	GCT	2	0	0	1	0	0
Ala	GCC	2	1	0	0.6666	0.3333	0
Ala	GCA	2	0	0	1	0	0
Ala	GCG	2	1	0	0.6666	0.3333	0
Arg	CGT	2	0	0	1	0	0
Arg	CGC	2	1	0	0.6666	0.3333	0
Gly	GGT	2	0	0	1	0	0
Gly	GGC	2	1	0	0.6666	0.3333	0
Gly	GGG	2	1	0	0.6666	0.3333	0
Ile	ATT	0	0	0	0	0	0
Ile	ATC	0	1	0	0	1	0
Ile	ATA	0	0	0	0	0	0
Arg	AGG	2	0	0	1	0	0
Phe	TTT	0	0	0	0	0	0
Phe	TTC	1	0	0	1	0	0
Ser	AGT	1	0	0	1	0	0
Ser	AGC	2	0	0	1	0	0
His	CAT	1	0	0	1	0	0
His	CAC	2	0	0	1	0	0
Asn	AAT	0	0	0	0	0	0
Asn	AAC	1	0	0	1	0	0
Asp	GAT	1	0	0	1	0	0
Asp	GAC	2	0	0	1	0	0
Met	ATG	1	0	0	1	0	0
Number of substitutions		68	19	7
Fraction of substitutions		0.723404	0.202128	0.0744681

## Sheet: Supplementary file 24_CG
		Number of substitutions
Wild type amino acid	Wild type codon	Missense	Silent	Nonsense	fM	fS	fN
Ser	TCA	0	0	1	0	0	1
Tyr	TAC	0	0	1	0	0	1
Leu	TTA	0	0	0	0	0	0
Tyr	TAT	0	0	0	0	0	0
Trp	TGG	2	0	0	1	0	0
Arg	CGA	2	0	0	1	0	0
Ser	TCG	1	1	0	0.5	0.5	0
Gly	GGA	2	0	0	1	0	0
Leu	TTG	1	0	0	1	0	0
Arg	AGA	1	0	0	1	0	0
Gln	CAA	1	0	0	1	0	0
Gln	CAG	2	0	0	1	0	0
Lys	AAA	0	0	0	0	0	0
Lys	AAG	1	0	0	1	0	0
Glu	GAA	1	0	0	1	0	0
Glu	GAG	2	0	0	1	0	0
Cys	TGT	1	0	0	1	0	0
Cys	TGC	2	0	0	1	0	0
Leu	CTA	1	0	0	1	0	0
Leu	CTG	1	1	0	0.5	0.5	0
Arg	CGG	2	1	0	0.6666	0.3333	0
Leu	CTT	1	0	0	1	0	0
Leu	CTC	1	1	0	0.5	0.5	0
Val	GTT	1	0	0	1	0	0
Val	GTC	1	1	0	0.5	0.5	0
Val	GTA	1	0	0	1	0	0
Val	GTG	1	1	0	0.5	0.5	0
Ser	TCT	1	0	0	1	0	0
Ser	TCC	1	1	0	0.5	0.5	0
Pro	CCT	2	0	0	1	0	0
Pro	CCC	2	1	0	0.6666	0.3333	0
Pro	CCA	2	0	0	1	0	0
Pro	CCG	2	1	0	0.6666	0.3333	0
Thr	ACT	1	0	0	1	0	0
Thr	ACC	1	1	0	0.5	0.5	0
Thr	ACA	1	0	0	1	0	0
Thr	ACG	1	1	0	0.5	0.5	0
Ala	GCT	2	0	0	1	0	0
Ala	GCC	2	1	0	0.6666	0.3333	0
Ala	GCA	2	0	0	1	0	0
Ala	GCG	2	1	0	0.6666	0.3333	0
Arg	CGT	2	0	0	1	0	0
Arg	CGC	2	1	0	0.6666	0.3333	0
Gly	GGT	2	0	0	1	0	0
Gly	GGC	2	1	0	0.6666	0.3333	0
Gly	GGG	2	1	0	0.6666	0.3333	0
Ile	ATT	0	0	0	0	0	0
Ile	ATC	1	0	0	1	0	0
Ile	ATA	0	0	0	0	0	0
Arg	AGG	2	0	0	1	0	0
Phe	TTT	0	0	0	0	0	0
Phe	TTC	1	0	0	1	0	0
Ser	AGT	1	0	0	1	0	0
Ser	AGC	2	0	0	1	0	0
His	CAT	1	0	0	1	0	0
His	CAC	2	0	0	1	0	0
Asn	AAT	0	0	0	0	0	0	.
Asn	AAC	1	0	0	1	0	0
Asp	GAT	1	0	0	1	0	0
Asp	GAC	2	0	0	1	0	0
Met	ATG	1	0	0	1	0	0
Number of substitutions		76	16	2
Fraction of substitutions		0.808511	0.170213	0.0212766

## Sheet: Supplementary file 24_CT
		Number of substitutions
Wild type amino acid	Wild type codon	Missense	Silent	Nonsense	fM	fS	fN
Trp	TGG	0	0	2	0	0	1
Gln	CAA	0	0	1	0	0	1
Arg	CGA	1	0	1	0.5	0	0.5
Gln	CAG	0	1	1	0	0.5	0.5
Ser	TCA	1	0	0	1	0	0
Leu	TTA	0	0	0	0	0	0
Tyr	TAT	0	0	0	0	0	0
Tyr	TAC	0	1	0	0	1	0
Ser	TCG	1	1	0	0.5	0.5	0
Gly	GGA	2	0	0	1	0	0
Leu	TTG	0	1	0	0	1	0
Arg	AGA	1	0	0	1	0	0
Lys	AAA	0	0	0	0	0	0
Lys	AAG	0	1	0	0	1	0
Glu	GAA	1	0	0	1	0	0
Glu	GAG	1	1	0	0.5	0.5	0
Cys	TGT	1	0	0	1	0	0
Cys	TGC	1	1	0	0.5	0.5	0
Leu	CTA	0	1	0	0	1	0
Leu	CTG	0	2	0	0	1	0
Arg	CGG	2	1	0	0.6666	0.3333	0
Leu	CTT	1	0	0	1	0	0
Leu	CTC	1	1	0	0.5	0.5	0
Val	GTT	1	0	0	1	0	0
Val	GTC	1	1	0	0.5	0.5	0
Val	GTA	1	0	0	1	0	0
Val	GTG	1	1	0	0.5	0.5	0
Ser	TCT	1	0	0	1	0	0
Ser	TCC	1	1	0	0.5	0.5	0
Pro	CCT	2	0	0	1	0	0
Pro	CCC	2	1	0	0.6666	0.3333	0
Pro	CCA	2	0	0	1	0	0
Pro	CCG	2	1	0	0.6666	0.3333	0
Thr	ACT	1	0	0	1	0	0
Thr	ACC	1	1	0	0.5	0.5	0
Thr	ACA	1	0	0	1	0	0
Thr	ACG	1	1	0	0.5	0.5	0
Ala	GCT	2	0	0	1	0	0
Ala	GCC	2	1	0	0.6666	0.3333	0
Ala	GCA	2	0	0	1	0	0
Ala	GCG	2	1	0	0.6666	0.3333	0
Arg	CGT	2	0	0	1	0	0
Arg	CGC	2	1	0	0.6666	0.3333	0
Gly	GGT	2	0	0	1	0	0
Gly	GGC	2	1	0	0.6666	0.3333	0
Gly	GGG	2	1	0	0.6666	0.3333	0
Ile	ATT	0	0	0	0	0	0
Ile	ATC	0	1	0	0	1	0
Ile	ATA	0	0	0	0	0	0
Arg	AGG	1	1	0	0.5	0.5	0
Phe	TTT	0	0	0	0	0	0
Phe	TTC	0	1	0	0	1	0
Ser	AGT	1	0	0	1	0	0
Ser	AGC	1	1	0	0.5	0.5	0
His	CAT	1	0	0	1	0	0
His	CAC	1	1	0	0.5	0.5	0
Asn	AAT	0	0	0	0	0	0
Asn	AAC	0	1	0	0	1	0
Asp	GAT	1	0	0	1	0	0
Asp	GAC	1	1	0	0.5	0.5	0
Met	ATG	1	0	0	1	0	0
Number of substitutions		58	31	5
Fraction of substitutions		0.617021	0.329787	0.0531915

## Sheet: Supplementary file 24_TA
		Number of substitutions
Wild type amino acid	Wild type codon	Missense	Silent	Nonsense	fM	fS	fN
Leu	TTG	1	0	1	0.5	0	0.5
Arg	AGA	1	0	1	0.5	0	0.5
Lys	AAG	1	0	1	0.5	0	0.5
Leu	TTA	2	0	1	0.6666	0	0.3333
Lys	AAA	2	0	1	0.6666	0	0.3333
Tyr	TAT	2	0	1	0.6666	0	0.333
Ser	TCA	1	1	0	0.5	0.5	0
Tyr	TAC	2	0	0	1	0	0
Trp	TGG	1	0	0	1	0	0
Arg	CGA	0	1	0	0	1	0
Ser	TCG	1	0	0	1	0	0
Gly	GGA	0	1	0	0	1	0
Gln	CAA	2	0	0	1	0	0
Gln	CAG	1	0	0	1	0	0
Glu	GAA	2	0	0	1	0	0
Glu	GAG	1	0	0	1	0	0
Cys	TGT	1	0	1	0.5	0	0.5
Cys	TGC	1	0	0	1	0	0
Leu	CTA	1	1	0	0.5	0.5	0
Leu	CTG	1	0	0	1	0	0
Arg	CGG	0	0	0	0	0	0
Leu	CTT	1	1	0	0.5	0.5	0
Leu	CTC	1	0	0	1	0	0
Val	GTT	1	1	0	0.5	0.5	0
Val	GTC	1	0	0	1	0	0
Val	GTA	1	1	0	0.5	0.5	0
Val	GTG	1	0	0	1	0	0
Ser	TCT	1	1	0	0.5	0.5	0
Ser	TCC	1	0	0	1	0	0
Pro	CCT	0	1	0	0	1	0
Pro	CCC	0	0	0	0	0	0
Pro	CCA	0	1	0	0	1	0
Pro	CCG	0	0	0	0	0	0
Thr	ACT	1	1	0	0.5	0.5	0
Thr	ACC	1	0	0	1	0	0
Thr	ACA	1	1	0	0.5	0.5	0
Thr	ACG	1	0	0	1	0	0
Ala	GCT	0	1	0	0	1	0
Ala	GCC	0	0	0	0	0	0
Ala	GCA	0	1	0	0	1	0
Ala	GCG	0	0	0	0	0	0
Arg	CGT	0	1	0	0	1	0
Arg	CGC	0	0	0	0	0	0
Gly	GGT	0	1	0	0	1	0
Gly	GGC	0	0	0	0	0	0
Gly	GGG	0	0	0	0	0	0
Ile	ATT	2	1	0	0.6666	0.3333	0
Ile	ATC	2	0	0	1	0	0
Ile	ATA	2	1	0	0.6666	0.3333	0
Arg	AGG	1	0	0	1	0	0
Phe	TTT	3	0	0	1	0	0
Phe	TTC	2	0	0	1	0	0
Ser	AGT	2	0	0	1	0	0
Ser	AGC	1	0	0	1	0	0
His	CAT	2	0	0	1	0	0
His	CAC	1	0	0	1	0	0
Asn	AAT	3	0	0	1	0	0
Asn	AAC	2	0	0	1	0	0
Asp	GAT	2	0	0	1	0	0
Asp	GAC	1	0	0	1	0	0
Met	ATG	2	0	0	1	0	0
Number of substitutions		64	18	7
Fraction of substitutions		0.719101	0.202247	0.0786517

## Sheet: Supplementary file 24_TC
		Number of substitutions
Wild type amino acid	Wild type codon	Missense	Silent	Nonsense	fM	fS	fN
Ser	TCA	1	1	0	0.5	0.5	0
Leu	TTA	1	2	0	0.3333	0.6666	0
Tyr	TAT	2	1	0	0.6666	0.3333	0
Tyr	TAC	2	0	0	1	0	0
Trp	TGG	1	0	0	1	0	0
Arg	CGA	0	1	0	0	1	0
Ser	TCG	1	0	0	1	0	0
Gly	GGA	0	1	0	0	1	0
Leu	TTG	1	1	0	0.5	0.5	0
Arg	AGA	1	1	0	0.5	0.5	0
Gln	CAA	1	1	0	0.5	0.5	0
Gln	CAG	1	0	0	1	0	0
Lys	AAA	2	1	0	0.6666	0.3333	0
Lys	AAG	2	0	0	1	0	0
Glu	GAA	1	1	0	0.5	0.5	0
Glu	GAG	1	0	0	1	0	0
Cys	TGT	1	1	0	0.5	0.5	0
Cys	TGC	1	0	0	1	0	0
Leu	CTA	1	1	0	0.5	0.5	0
Leu	CTG	1	0	0	1	0	0
Arg	CGG	0	0	0	0	0	0
Leu	CTT	1	1	0	0.5	0.5	0
Leu	CTC	1	0	0	1	0	0
Val	GTT	1	1	0	0.5	0.5	0
Val	GTC	1	0	0	1	0	0
Val	GTA	1	1	0	0.5	0.5	0
Val	GTG	1	0	0	1	0	0
Ser	TCT	1	1	0	0.5	0.5	0
Ser	TCC	1	0	0	1	0	0
Pro	CCT	0	1	0	0	1	0
Pro	CCC	0	0	0	0	0	0
Pro	CCA	0	1	0	0	1	0
Pro	CCG	0	0	0	0	0	0
Thr	ACT	1	1	0	0.5	0.5	0
Thr	ACC	1	0	0	1	0	0
Thr	ACA	1	1	0	0.5	0.5	0
Thr	ACG	1	0	0	1	0	0
Ala	GCT	0	1	0	0	1	0
Ala	GCC	0	0	0	0	0	0
Ala	GCA	0	1	0	0	1	0
Ala	GCG	0	0	0	0	0	0
Arg	CGT	0	1	0	0	1	0
Arg	CGC	0	0	0	0	0	0
Gly	GGT	0	1	0	0	1	0
Gly	GGC	0	0	0	0	0	0
Gly	GGG	0	0	0	0	0	0
Ile	ATT	2	1	0	0.6666	0.3333	0
Ile	ATC	2	0	0	1	0	0
Ile	ATA	3	0	0	1	0	0
Arg	AGG	1	0	0	1	0	0
Phe	TTT	2	1	0	0.6666	0.3333	0
Phe	TTC	2	0	0	1	0	0
Ser	AGT	1	1	0	0.5	0.5	0
Ser	AGC	1	0	0	1	0	0
His	CAT	1	1	0	0.5	0.5	0
His	CAC	1	0	0	1	0	0
Asn	AAT	2	1	0	0.6666	0.3333	0
Asn	AAC	2	0	0	1	0	0
Asp	GAT	1	1	0	0.5	0.5	0
Asp	GAC	1	0	0	1	0	0
Met	ATG	2	0	0	1	0	0
Number of substitutions		58	31	0
Fraction of substitutions		0.651685	0.348315	0

## Sheet: Supplementary file 24_TG
		Number of substitutions
Wild type amino acid	Wild type codon	Missense	Silent	Nonsense	fM	fS	fN
Leu	TTA	2	0	1	0.6666	0	0.3333
Tyr	TAT	2	0	1	0.6666	0	0.3333
Ser	TCA	1	1	0	0.5	0.5	0
Tyr	TAC	2	0	0	1	0	0
Trp	TGG	1	0	0	1	0	0
Arg	CGA	0	1	0	0	1	0
Ser	TCG	1	0	0	1	0	0
Gly	GGA	0	1	0	0	1	0
Leu	TTG	2	0	0	1	0	0
Arg	AGA	1	1	0	0.5	0.5	0
Gln	CAA	2	0	0	1	0	0
Gln	CAG	1	0	0	1	0	0
Lys	AAA	3	0	0	1	0	0
Lys	AAG	2	0	0	1	0	0
Glu	GAA	2	0	0	1	0	0
Glu	GAG	1	0	0	1	0	0
Cys	TGT	2	0	0	1	0	0
Cys	TGC	1	0	0	1	0	0
Leu	CTA	1	1	0	0.5	0.5	0
Leu	CTG	1	0	0	1	0	0
Arg	CGG	0	0	0	0	0	0
Leu	CTT	1	1	0	0.5	0.5	0
Leu	CTC	1	0	0	1	0	0
Val	GTT	1	1	0	0.5	0.5	0
Val	GTC	1	0	0	1	0	0
Val	GTA	1	1	0	0.5	0.5	0
Val	GTG	1	0	0	1	0	0
Ser	TCT	1	1	0	0.5	0.5	0
Ser	TCC	1	0	0	1	0	0
Pro	CCT	0	1	0	0	1	0
Pro	CCC	0	0	0	0	0	0
Pro	CCA	0	1	0	0	1	0
Pro	CCG	0	0	0	0	0	0
Thr	ACT	1	1	0	0.5	0.5	0
Thr	ACC	1	0	0	1	0	0
Thr	ACA	1	1	0	0.5	0.5	0
Thr	ACG	1	0	0	1	0	0
Ala	GCT	0	1	0	0	1	0
Ala	GCC	0	0	0	0	0	0
Ala	GCA	0	1	0	0	1	0
Ala	GCG	0	0	0	0	0	0
Arg	CGT	0	1	0	0	1	0
Arg	CGC	0	0	0	0	0	0
Gly	GGT	0	1	0	0	1	0
Gly	GGC	0	0	0	0	0	0
Gly	GGG	0	0	0	0	0	0
Ile	ATT	3	0	0	1	0	0
Ile	ATC	2	0	0	1	0	0
Ile	ATA	2	1	0	0.6666	0.3333	0
Arg	AGG	0	1	0	0	1	0
Phe	TTT	3	0	0	1	0	0
Phe	TTC	2	0	0	1	0	0
Ser	AGT	2	0	0	1	0	0
Ser	AGC	1	0	0	1	0	0
His	CAT	2	0	0	1	0	0
His	CAC	1	0	0	1	0	0
Asn	AAT	3	0	0	1	0	0
Asn	AAC	2	0	0	1	0	0
Asp	GAT	2	0	0	1	0	0
Asp	GAC	1	0	0	1	0	0
Met	ATG	2	0	0	1	0	0
Number of substitutions		68	19	2
Fraction of substitutions		0.764045	0.213483	0.0224719
