# Supplementary material for: Use of signals of positive and negative selection to distinguish cancer genes and passenger genes
Source: eLife. 2021 Jan 11;10:e59629. doi: 10.7554/eLife.59629 (PMC7877913; doi:10.7554/eLife.59629)
Supplement: Supplementary file 26. [file elife-59629-supp26.xlsx]

## Sheet: Supplementary file 26
Cancer types	C>A	C>G	C>T	T>A	T>C	T>G
Biliary-AdenoCA	0.133065	0.086187	0.350554	0.0711423	0.292528	0.0665236
Bladder-TCC	0.120902	0.253986	0.392044	0.0546433	0.135087	0.0433378
Bone-Benign	0.176939	0.0895334	0.320784	0.132388	0.207075	0.0732807
Bone-Epith	0.155299	0.12995	0.349285	0.0839986	0.180611	0.100857
Bone-Osteosarc	0.173909	0.140773	0.292243	0.101338	0.170173	0.121562
Breast-AdenoCA	0.140517	0.215573	0.358247	0.0753956	0.147639	0.0626289
Breast-DCIS	0.126122	0.100281	0.366705	0.0825071	0.238232	0.0861525
Breast-LobularCA	0.111174	0.291284	0.449727	0.03619	0.083241	0.0283843
CNS-GBM	0.0740989	0.0541381	0.665259	0.0454808	0.112906	0.0481175
CNS-Medullo	0.157439	0.0969305	0.401626	0.0815757	0.185961	0.0764676
CNS-Oligo	0.111132	0.0845348	0.414618	0.084063	0.236765	0.0688876
CNS-PiloAstro	0.112865	0.0872892	0.457135	0.0719724	0.194957	0.0757816
Cervix-AdenoCA	0.0796422	0.121216	0.517155	0.0528643	0.180388	0.0487336
Cervix-SCC	0.113133	0.240948	0.451257	0.0405793	0.114423	0.0396603
ColoRect-AdenoCA	0.351726	0.0269159	0.237304	0.032944	0.113614	0.237496
Eso-AdenoCA	0.110578	0.069502	0.198703	0.0725703	0.220783	0.327863
Head-SCC	0.19192	0.201298	0.348448	0.0697094	0.136662	0.0519632
Kidney-ChRCC	0.125537	0.0902186	0.456993	0.0717167	0.163404	0.0921313
Kidney-RCC	0.176197	0.116931	0.256789	0.167394	0.170285	0.112404
Liver-HCC	0.166902	0.083775	0.246868	0.0954861	0.338958	0.0680107
Lung-AdenoCA	0.398106	0.116631	0.205518	0.119096	0.110543	0.050105
Lung-SCC	0.327722	0.139252	0.231077	0.107763	0.150824	0.0433633
Lymph-BNHL	0.142109	0.0916392	0.260516	0.0968193	0.218982	0.189935
Lymph-CLL	0.127073	0.094588	0.32079	0.0902853	0.236089	0.131175
Myeloid-AML	0.166697	0.0685902	0.426837	0.0863396	0.194749	0.0567874
Myeloid-MDS	0.0911575	0.0828612	0.443187	0.0703688	0.245689	0.066737
Myeloid-MPN	0.0942652	0.0853498	0.422716	0.0726794	0.252679	0.0723111
Ovary-AdenoCA	0.165705	0.166153	0.262046	0.118239	0.196195	0.0916616
Panc-AdenoCA	0.14766	0.103585	0.395239	0.0743875	0.190046	0.0890822
Panc-Endocrine	0.254324	0.108148	0.313484	0.0829031	0.180641	0.0604998
Prost-AdenoCA	0.172551	0.105294	0.349573	0.0890157	0.190354	0.0932123
Skin-Melanoma	0.0166123	0.00957274	0.865892	0.0396519	0.0523325	0.0159382
SoftTissue-Leiomyo	0.175946	0.130265	0.311369	0.0922366	0.177853	0.112331
SoftTissue-Liposarc	0.167002	0.157015	0.318348	0.093224	0.165191	0.0992207
Stomach-AdenoCA	0.136681	0.065214	0.309786	0.0711637	0.261916	0.155239
Thy-AdenoCA	0.130552	0.141849	0.372965	0.0749773	0.1993	0.0803567
Uterus-AdenoCA	0.233692	0.0518794	0.444307	0.0409919	0.169718	0.0594124
Average (rows 2-38)	0.158296	0.116193	0.372578	0.0795703	0.184238	0.0891247
standard deviation	0.0747601	0.0606309	0.126294	0.0277886	0.0574585	0.0591352
