# Supplementary material for: Use of signals of positive and negative selection to distinguish cancer genes and passenger genes
Source: eLife. 2021 Jan 11;10:e59629. doi: 10.7554/eLife.59629 (PMC7877913; doi:10.7554/eLife.59629)
Supplement: Supplementary file 27. [file elife-59629-supp27.xlsx]

## Sheet: Supplementary file 27
Gene name	fM*	fS*	fN*			fM*	fS*	fN*
A1BG	0.67704	0.290304	0.0326558		average	0.691145	0.264024	0.0448315
A1CF	0.691326	0.262027	0.0466468		standard deviation	0.0163533	0.0226927	0.0111371
A1CF_ENST00000282641	0.690277	0.262851	0.0468719
A1CF_ENST00000373993	0.691	0.261837	0.0471622
A1CF_ENST00000373995	0.690614	0.263034	0.0463522
A1CF_ENST00000373997	0.690277	0.262851	0.0468719
A1CF_ENST00000374001	0.690277	0.262851	0.0468719
A1CF_ENST00000395495	0.690614	0.263034	0.0463522
A2M	0.685116	0.268542	0.0463425
A2ML1	0.682112	0.270711	0.0471768
A2ML1_ENST00000539547	0.684878	0.269146	0.045976
A3GALT2	0.685494	0.276407	0.0380992
A4GALT	0.673656	0.29118	0.0351637
A4GALT_ENST00000249005	0.673656	0.29118	0.0351637
A4GALT_ENST00000381278	0.673656	0.29118	0.0351637
A4GALT_ENST00000642412	0.673656	0.29118	0.0351637
A4GNT	0.681552	0.269222	0.0492257
AAAS	0.681223	0.276384	0.0423926
AAAS_ENST00000394384	0.681013	0.276611	0.0423763
AAAS_ENST00000550286	0.682282	0.275399	0.0423195
AACS	0.681886	0.278674	0.0394399
AADAC	0.705334	0.246962	0.0477039
AADAC_ENST00000488869	0.701694	0.250661	0.0476456
AADACL2	0.722801	0.228554	0.048645
AADACL3	0.670023	0.288342	0.0416352
AADACL4	0.67625	0.290771	0.0329789
AADAT	0.707461	0.243286	0.0492536
AADAT_ENST00000337664	0.707503	0.24312	0.0493772
AADAT_ENST00000353187	0.707503	0.24312	0.0493772
AADAT_ENST00000515480	0.707503	0.24312	0.0493772
AAGAB	0.714067	0.232136	0.0537964
AAGAB_ENST00000542650	0.721016	0.226495	0.0524886
AAGAB_ENST00000561452	0.721016	0.226495	0.0524886
AAK1	0.686297	0.262653	0.05105
AAK1_ENST00000406297	0.682172	0.263346	0.0544822
AAK1_ENST00000409068	0.676697	0.264459	0.0588444
AAMDC	0.712425	0.235377	0.0521984
AAMDC_ENST00000393427	0.705424	0.238538	0.0560372
AAMDC_ENST00000525034	0.702357	0.238115	0.0595278
AAMDC_ENST00000525409	0.702373	0.232845	0.0647822
AAMDC_ENST00000526415	0.705424	0.238538	0.0560372
AAMDC_ENST00000527134	0.707448	0.226308	0.0662434
AAMDC_ENST00000532481	0.72161	0.219616	0.0587741
AAMDC_ENST00000533193	0.702112	0.247771	0.0501167
AAMDC_ENST00000630098	0.712425	0.235377	0.0521984
AAMP	0.701816	0.261328	0.0368555
AAMP_ENST00000248450	0.702024	0.26103	0.0369461
AAMP_ENST00000420660	0.700887	0.262452	0.0366613
AANAT	0.686164	0.284347	0.0294886
AANAT_ENST00000392492	0.69084	0.282438	0.0267216
AAR2	0.682357	0.281354	0.0362895
AAR2_ENST00000320849	0.682357	0.281354	0.0362895
AAR2_ENST00000397286	0.682366	0.279882	0.0377523
AARD	0.691097	0.262784	0.0461185
AARS	0.685575	0.277466	0.0369586
AARS2	0.676885	0.28341	0.0397048
AARSD1	0.696079	0.268384	0.0355373
AASDH	0.714797	0.231588	0.0536148
AASDH_ENST00000451613	0.713969	0.233933	0.0520984
AASDH_ENST00000502617	0.716058	0.232637	0.0513053
AASDH_ENST00000513376	0.717155	0.230834	0.0520106
AASDH_ENST00000602986	0.71648	0.231344	0.0521759
AASDHPPT	0.706617	0.23654	0.056843
AASS	0.708985	0.248831	0.0421839
AASS_ENST00000417368	0.708985	0.248831	0.0421839
AATF	0.706852	0.248761	0.0443868
AATK	0.689961	0.277911	0.0321276
AATK_ENST00000417379	0.690405	0.276803	0.0327922
ABAT	0.677627	0.286866	0.0355077
ABAT_ENST00000268251	0.677627	0.286866	0.0355077
ABAT_ENST00000425191	0.677627	0.286866	0.0355077
ABAT_ENST00000567812	0.677541	0.285199	0.0372596
ABAT_ENST00000569156	0.678298	0.281882	0.0398204
ABCA1	0.682685	0.275188	0.0421269
ABCA1_ENST00000374733	0.69631	0.269837	0.0338526
ABCA1_ENST00000423487	0.693517	0.259854	0.0466289
ABCA10	0.707994	0.238773	0.0532334
ABCA12	0.694916	0.258905	0.0461792
ABCA12_ENST00000389661	0.696303	0.258696	0.0450006
ABCA12_ENST00000412081	0.704589	0.224995	0.0704164
ABCA13	0.697462	0.251056	0.0514817
ABCA2	0.673973	0.292155	0.0338729
ABCA2_ENST00000265662	0.673998	0.292128	0.0338742
ABCA2_ENST00000371605	0.673993	0.292118	0.0338888
ABCA2_ENST00000614293	0.674182	0.291948	0.0338701
ABCA3	0.672902	0.292575	0.0345231
ABCA3_ENST00000382381	0.673184	0.292613	0.0342023
ABCA3_ENST00000567910	0.665188	0.295174	0.039638
ABCA4	0.672433	0.286812	0.0407544
ABCA4_ENST00000536513	0.677253	0.286535	0.0362115
ABCA5	0.71886	0.22631	0.05483
ABCA5_ENST00000588877	0.71886	0.22631	0.05483
ABCA6	0.699219	0.248354	0.0524263
ABCA6_ENST00000590645	0.719169	0.222143	0.0586872
ABCA7	0.673702	0.294701	0.031597
ABCA7_ENST00000433129	0.673702	0.294701	0.031597
ABCA7_ENST00000435683	0.67458	0.293624	0.0317963
ABCA8	0.694499	0.255594	0.0499071
ABCA8_ENST00000269080	0.694694	0.255786	0.0495194
ABCA8_ENST00000430352	0.694194	0.2558	0.0500059
ABCA8_ENST00000615593	0.702023	0.238232	0.0597452
ABCA9	0.69272	0.253696	0.0535836
ABCA9_ENST00000453985	0.692805	0.25369	0.0535046
ABCA9_ENST00000495634	0.714059	0.219846	0.066095
ABCB1	0.694659	0.260734	0.0446077
ABCB1_ENST00000265724	0.694659	0.260734	0.0446077
ABCB1_ENST00000543898	0.694709	0.262022	0.0432693
ABCB10	0.670575	0.294988	0.034437
ABCB11	0.69728	0.254868	0.0478524
ABCB4	0.686704	0.266229	0.0470667
ABCB4_ENST00000358400	0.685955	0.266858	0.0471871
ABCB4_ENST00000359206	0.686576	0.266344	0.0470799
ABCB4_ENST00000453593	0.685955	0.266858	0.0471871
ABCB5	0.699346	0.252307	0.0483474
ABCB5_ENST00000258738	0.699646	0.251278	0.0490761
ABCB5_ENST00000406935	0.69874	0.254364	0.0468958
ABCB5_ENST00000443026	0.698846	0.253765	0.047389
ABCB6	0.668799	0.289902	0.0412992
ABCB6_ENST00000295750	0.668166	0.291658	0.0401757
ABCB7	0.702989	0.251013	0.0459985
ABCB7_ENST00000253577	0.702989	0.251013	0.0459985
ABCB7_ENST00000339447	0.703267	0.250265	0.0464682
ABCB7_ENST00000373394	0.703132	0.251095	0.0457729
ABCB7_ENST00000620875	0.703117	0.250179	0.0467043
ABCB7_ENST00000644766	0.699937	0.254921	0.0451421
ABCB8	0.680106	0.287772	0.0321214
ABCB8_ENST00000358849	0.680522	0.28836	0.0311179
ABCB8_ENST00000477092	0.679931	0.286923	0.0331459
ABCB8_ENST00000477719	0.67902	0.287717	0.0332632
ABCB8_ENST00000498578	0.678552	0.290052	0.0313967
ABCB8_ENST00000542328	0.679158	0.290707	0.0301344
ABCB9	0.671346	0.295104	0.0335502
ABCB9_ENST00000280560	0.671346	0.295104	0.0335502
ABCB9_ENST00000344275	0.669387	0.296864	0.0337488
ABCB9_ENST00000346530	0.672084	0.29485	0.033066
ABCB9_ENST00000392439	0.671346	0.295104	0.0335502
ABCB9_ENST00000442028	0.671417	0.294915	0.0336679
ABCB9_ENST00000442833	0.669951	0.296328	0.0337213
ABCB9_ENST00000540285	0.669411	0.296657	0.0339322
ABCC1	0.668008	0.292472	0.0395207
ABCC1_ENST00000399408	0.669661	0.293991	0.0363478
ABCC10	0.660659	0.302335	0.0370061
ABCC10_ENST00000244533	0.66029	0.302416	0.0372941
ABCC11	0.676352	0.284422	0.0392259
ABCC11_ENST00000353782	0.67646	0.283984	0.039556
ABCC11_ENST00000356608	0.676352	0.284422	0.0392259
ABCC11_ENST00000394748	0.676352	0.284422	0.0392259
ABCC12	0.685079	0.274815	0.0401053
ABCC2	0.678182	0.278036	0.0437823
ABCC2_ENST00000370434	0.665256	0.273453	0.0612913
ABCC3	0.668248	0.295407	0.0363447
ABCC3_ENST00000427699	0.660077	0.300874	0.0390488
ABCC3_ENST00000515707	0.682833	0.27128	0.0458868
ABCC4	0.687937	0.25964	0.0524229
ABCC4_ENST00000376887	0.687937	0.25964	0.0524229
ABCC4_ENST00000536256	0.682173	0.265378	0.0524491
ABCC4_ENST00000629385	0.684615	0.264058	0.0513268
ABCC4_ENST00000646439	0.68824	0.2592	0.0525594
ABCC5	0.681431	0.279252	0.0393175
ABCC5_ENST00000265586	0.682391	0.278189	0.0394196
ABCC5_ENST00000382494	0.698478	0.261362	0.04016
ABCC5_ENST00000392579	0.698391	0.265566	0.0360432
ABCC5_ENST00000427120	0.697457	0.264436	0.0381075
ABCC5_ENST00000446941	0.718856	0.251165	0.0299793
ABCC6	0.672651	0.288561	0.0387878
ABCC6_ENST00000575728	0.68468	0.277233	0.0380876
ABCC6_ENST00000622290	0.673768	0.286609	0.0396234
ABCC6_ENST00000640696	0.671167	0.295625	0.0332073
ABCC8	0.667163	0.29796	0.0348762
ABCC8_ENST00000389817	0.667062	0.298038	0.0348996
ABCC8_ENST00000612903	0.686273	0.297532	0.0161952
ABCC8_ENST00000642271	0.667052	0.298025	0.034923
ABCC8_ENST00000643260	0.667153	0.297947	0.0348996
ABCC8_ENST00000643878	0.667163	0.29796	0.0348762
ABCC8_ENST00000644772	0.667416	0.297604	0.0349804
ABCC8_ENST00000646902	0.667573	0.297599	0.0348271
ABCC8_ENST00000647015	0.666657	0.298017	0.0353254
ABCC9	0.701701	0.252048	0.0462509
ABCC9_ENST00000261201	0.702132	0.252379	0.0454888
ABCC9_ENST00000326684	0.714038	0.235048	0.0509137
ABCC9_ENST00000538350	0.713309	0.245628	0.0410631
ABCC9_ENST00000621589	0.714038	0.235048	0.0509137
ABCC9_ENST00000636888	0.714038	0.235048	0.0509137
ABCD1	0.670429	0.290901	0.0386699
ABCD1_ENST00000370129	0.673608	0.29256	0.0338319
ABCD2	0.702014	0.247712	0.0502742
ABCD3	0.695019	0.248266	0.0567152
ABCD3_ENST00000315713	0.681659	0.279643	0.0386981
ABCD4	0.670559	0.287858	0.0415836
ABCD4_ENST00000557588	0.660509	0.290232	0.0492586
ABCE1	0.710295	0.242513	0.0471914
ABCF1	0.672896	0.276219	0.0508845
ABCF1_ENST00000376545	0.671767	0.278374	0.0498598
ABCF2	0.681423	0.27598	0.0425976
ABCF3	0.673834	0.286504	0.039662
ABCF3_ENST00000292808	0.674774	0.285616	0.0396094
ABCG1	0.676695	0.289965	0.0333401
ABCG1_ENST00000343687	0.677108	0.289403	0.0334889
ABCG1_ENST00000347800	0.677189	0.289647	0.033164
ABCG1_ENST00000398437	0.678269	0.28571	0.0360205
ABCG1_ENST00000398449	0.677563	0.289642	0.0327951
ABCG1_ENST00000398457	0.67605	0.289503	0.0344469
ABCG2	0.684915	0.270564	0.044521
ABCG2_ENST00000515655	0.692993	0.262722	0.0442851
ABCG4	0.672168	0.296901	0.0309307
ABCG4_ENST00000615496	0.672168	0.296901	0.0309307
ABCG4_ENST00000622721	0.672168	0.296901	0.0309307
ABCG5	0.676834	0.289316	0.0338499
ABCG5_ENST00000405322	0.676834	0.289316	0.0338499
ABCG8	0.668974	0.295396	0.0356308
ABCG8_ENST00000272286	0.668974	0.295396	0.0356308
ABHD1	0.662046	0.294903	0.0430509
ABHD1_ENST00000621324	0.661361	0.296604	0.0420349
ABHD10	0.709253	0.242786	0.0479611
ABHD10_ENST00000494817	0.69922	0.257173	0.0436077
ABHD11	0.686136	0.285033	0.0288311
ABHD11_ENST00000395147	0.686989	0.283197	0.0298146
ABHD11_ENST00000437775	0.686134	0.285284	0.0285823
ABHD11_ENST00000458339	0.689021	0.281792	0.0291864
ABHD12	0.675006	0.28087	0.0441247
ABHD12_ENST00000339157	0.673869	0.282722	0.0434085
ABHD12B	0.703605	0.259206	0.0371893
ABHD12B_ENST00000353130	0.704158	0.258773	0.0370691
ABHD13	0.708454	0.234704	0.0568416
ABHD14A	0.666177	0.299321	0.0345011
ABHD14A_ENST00000458031	0.667451	0.294006	0.0385434
ABHD14A_ENST00000491470	0.685921	0.277356	0.0367228
ABHD14A-ACY1_ENST00000463937	0.686345	0.280668	0.0329865
ABHD14B	0.671526	0.2985	0.0299732
ABHD14B_ENST00000315877	0.672068	0.295158	0.0327748
ABHD14B_ENST00000361143	0.671526	0.2985	0.0299732
ABHD14B_ENST00000395008	0.671526	0.2985	0.0299732
ABHD14B_ENST00000461108	0.670932	0.295876	0.0331917
ABHD14B_ENST00000525795	0.671526	0.2985	0.0299732
ABHD15	0.678508	0.287023	0.0344689
ABHD16A	0.670155	0.287073	0.0427715
ABHD16A_ENST00000440843	0.670989	0.285684	0.043327
ABHD16B	0.680935	0.28366	0.0354046
ABHD17A	0.672954	0.292211	0.0348349
ABHD17A_ENST00000292577	0.675848	0.291268	0.0328843
ABHD17A_ENST00000590661	0.673715	0.289584	0.0367003
ABHD17B	0.717949	0.229249	0.0528023
ABHD17B_ENST00000333421	0.718126	0.229859	0.0520141
ABHD17C	0.68685	0.276374	0.0367755
ABHD17C_ENST00000558464	0.687194	0.274795	0.0380116
ABHD17C_ENST00000560609	0.706109	0.254215	0.0396759
ABHD18	0.710214	0.231035	0.0587508
ABHD18_ENST00000388795	0.707287	0.232826	0.0598876
ABHD18_ENST00000398965	0.712679	0.231932	0.0553895
ABHD18_ENST00000444616	0.712679	0.231932	0.0553895
ABHD18_ENST00000611882	0.711061	0.229269	0.0596703
ABHD2	0.678483	0.278477	0.04304
ABHD2_ENST00000565973	0.678483	0.278477	0.04304
ABHD3	0.692659	0.257084	0.0502565
ABHD3_ENST00000578270	0.703246	0.240932	0.0558222
ABHD3_ENST00000580981	0.690441	0.255882	0.0536773
ABHD4	0.685838	0.270777	0.0433846
ABHD4_ENST00000216327	0.67764	0.27411	0.0482504
ABHD5	0.692644	0.254604	0.0527524
ABHD5_ENST00000454293	0.691459	0.258667	0.049874
ABHD5_ENST00000458276	0.687368	0.258124	0.0545082
ABHD6	0.684323	0.271845	0.0438316
ABHD6_ENST00000295962	0.684323	0.271845	0.0438316
ABHD8	0.678133	0.292345	0.0295227
ABI1	0.707565	0.25453	0.0379049
ABI1_ENST00000346832	0.706828	0.253954	0.039218
ABI1_ENST00000359188	0.708689	0.251569	0.0397424
ABI1_ENST00000376137	0.709805	0.252875	0.0373202
ABI1_ENST00000376138	0.709916	0.249754	0.0403297
ABI1_ENST00000376139	0.709789	0.25125	0.0389603
ABI1_ENST00000376140	0.708576	0.251778	0.039646
ABI1_ENST00000376160	0.709906	0.251038	0.0390561
ABI1_ENST00000376166	0.711356	0.248936	0.0397087
ABI1_ENST00000376170	0.710036	0.24953	0.0404344
ABI1_ENST00000490841	0.710899	0.250571	0.0385305
ABI1_ENST00000536334	0.711412	0.250665	0.0379233
ABI2	0.705194	0.255839	0.0389673
ABI2_ENST00000261016	0.721865	0.23993	0.0382051
ABI2_ENST00000261017	0.703046	0.253037	0.0439169
ABI2_ENST00000261018	0.705194	0.255839	0.0389673
ABI2_ENST00000422511	0.705127	0.252908	0.0419643
ABI2_ENST00000424558	0.705409	0.256275	0.0383155
ABI2_ENST00000430418	0.707024	0.254773	0.0382022
ABI3	0.674229	0.29481	0.030961
ABI3_ENST00000419580	0.673801	0.295236	0.0309626
ABI3BP	0.698154	0.253577	0.0482685
ABI3BP_ENST00000471714	0.704115	0.251584	0.0443008
ABI3BP_ENST00000495063	0.704736	0.25283	0.0424344
ABL1	0.681109	0.282655	0.0362364
ABL1_ENST00000318560	0.680186	0.284055	0.0357582
ABL2	0.689869	0.266325	0.0438055
ABL2_ENST00000344730	0.689989	0.262628	0.0473824
ABL2_ENST00000367623	0.6888	0.267222	0.0439776
ABL2_ENST00000392043	0.683695	0.258908	0.0573972
ABL2_ENST00000504405	0.688772	0.26356	0.0476683
ABL2_ENST00000507173	0.686845	0.266446	0.0467086
ABL2_ENST00000511413	0.68806	0.265469	0.046471
ABL2_ENST00000512653	0.691672	0.26366	0.0446676
ABLIM1	0.694897	0.262086	0.0430176
ABLIM1_ENST00000369252	0.694745	0.260708	0.0445471
ABLIM1_ENST00000369253	0.696206	0.25494	0.0488547
ABLIM1_ENST00000369256	0.694575	0.260603	0.0448217
ABLIM1_ENST00000369266	0.696968	0.25494	0.0480922
ABLIM1_ENST00000392952	0.695252	0.257828	0.0469203
ABLIM1_ENST00000392955	0.6954	0.259286	0.045314
ABLIM1_ENST00000533213	0.695823	0.259286	0.044891
ABLIM2	0.685432	0.273317	0.0412509
ABLIM2_ENST00000341937	0.685987	0.272755	0.0412574
ABLIM2_ENST00000361581	0.686062	0.272277	0.0416606
ABLIM2_ENST00000361737	0.683574	0.273809	0.0426163
ABLIM2_ENST00000407564	0.684229	0.272702	0.0430688
ABLIM2_ENST00000428004	0.684741	0.271925	0.0433336
ABLIM2_ENST00000505872	0.684367	0.273365	0.0422676
ABLIM2_ENST00000514025	0.688208	0.267978	0.0438144
ABLIM2_ENST00000545242	0.687036	0.272742	0.0402219
ABLIM3	0.677795	0.273333	0.0488718
ABLIM3_ENST00000309868	0.677795	0.273333	0.0488718
ABLIM3_ENST00000326685	0.676613	0.274051	0.0493359
ABLIM3_ENST00000356541	0.676351	0.280357	0.0432915
ABLIM3_ENST00000504238	0.67913	0.271977	0.0488928
ABLIM3_ENST00000508983	0.676844	0.273613	0.0495426
ABLIM3_ENST00000517451	0.674255	0.280932	0.0448139
ABO	0.67418	0.288103	0.0377178
ABO_ENST00000611156	0.676093	0.285678	0.0382287
ABR	0.671739	0.290145	0.0381158
ABR_ENST00000291107	0.670361	0.292052	0.0375868
ABR_ENST00000536794	0.671639	0.292971	0.0353904
ABR_ENST00000543210	0.674844	0.291363	0.0337937
ABR_ENST00000544583	0.671038	0.291702	0.0372596
ABR_ENST00000572441	0.687579	0.280279	0.0321422
ABR_ENST00000574437	0.671177	0.29041	0.038413
ABRA	0.695825	0.254076	0.0500987
ABRACL	0.71667	0.245077	0.0382535
ABRACL_ENST00000461027	0.710697	0.244233	0.0450702
ABRAXAS1	0.724691	0.218907	0.056402
ABRAXAS1_ENST00000506553	0.728007	0.212078	0.0599144
ABRAXAS1_ENST00000515303	0.69614	0.240074	0.0637863
ABRAXAS2	0.710333	0.238316	0.0513502
ABT1	0.68169	0.276799	0.0415118
ABTB1	0.681425	0.284677	0.0338985
ABTB1_ENST00000453791	0.682744	0.284082	0.0331738
ABTB1_ENST00000468137	0.682744	0.284082	0.0331738
ABTB2	0.682951	0.283334	0.0337157
AC001226.2_ENST00000638101	0.717485	0.205128	0.0773871
AC002094.3	0.67046	0.275191	0.0543488
AC002310.4	0.682004	0.274509	0.0434876
AC002996.1	0.682935	0.284322	0.0327431
AC003002.1	0.694283	0.251778	0.0539392
AC003002.2	0.69749	0.257247	0.0452628
AC003002.3	0.715497	0.238889	0.0456139
AC003006.1	0.707622	0.238601	0.0537775
AC004076.1	0.699743	0.255109	0.045148
AC004080.3	0.687102	0.264071	0.0488266
AC004223.3	0.684889	0.27717	0.0379412
AC004233.2	0.657113	0.300978	0.0419093
AC004593.3	0.69402	0.260425	0.0455543
AC004691.2	0.680695	0.289909	0.0293955
AC004754.1	0.691535	0.275289	0.0331756
AC004832.3	0.681652	0.284547	0.033801
AC004922.1	0.692837	0.268209	0.0389536
AC005154.6	0.711549	0.218789	0.0696625
AC005324.3	0.687733	0.266539	0.0457282
AC005551.1	0.679007	0.285674	0.0353195
AC005697.1	0.675653	0.267957	0.05639
AC005702.1	0.698459	0.247991	0.0535505
AC005726.1_ENST00000577790	0.662108	0.288635	0.0492573
AC005837.2	0.676139	0.268122	0.055739
AC006486.1	0.65467	0.302433	0.0428968
AC006518.7	0.644082	0.277107	0.0788103
AC006538.2	0.68019	0.301681	0.0181295
AC007040.2	0.664991	0.287642	0.0473663
AC007326.4	0.65807	0.291394	0.0505364
AC007846.2	0.634797	0.33031	0.0348931
AC007906.2	0.697168	0.269279	0.033553
AC007998.2	0.683389	0.276643	0.0399671
AC008162.2	0.699163	0.222069	0.0787674
AC008397.1	0.706525	0.267008	0.0264671
AC008397.2	0.68268	0.280738	0.036581
AC008403.1	0.679519	0.284756	0.0357253
AC008687.1	0.690951	0.279094	0.0299547
AC008687.4	0.683165	0.279669	0.0371665
AC008695.1	0.720473	0.230854	0.0486734
AC008758.1	0.743459	0.200754	0.0557866
AC008758.5	0.71546	0.226057	0.0584834
AC008763.3	0.673053	0.290147	0.0367998
AC008770.2	0.72594	0.219888	0.0541722
AC008770.2_ENST00000591944	0.708954	0.239817	0.0512283
AC008878.1	0.672549	0.281413	0.0460373
AC008878.3	0.68015	0.27873	0.04112
AC008982.1	0.690382	0.273177	0.0364408
AC009086.2	0.671189	0.296914	0.031897
AC009119.2	0.676038	0.277194	0.0467673
AC009163.4	0.698413	0.251386	0.0502016
AC009477.2	0.686755	0.305179	0.00806654
AC009779.3	0.678448	0.274605	0.046947
AC009779.3_ENST00000549424	0.666296	0.268857	0.0648467
AC010255.3	0.715028	0.239971	0.0450009
AC010255.3_ENST00000514637	0.720234	0.231095	0.0486719
AC010319.2	0.685978	0.286516	0.027506
AC010325.1	0.667149	0.290794	0.042057
AC010325.1_ENST00000562076	0.64645	0.319641	0.0339097
AC010422.5	0.688268	0.273174	0.0385588
AC010487.3	0.727656	0.216051	0.0562927
AC010522.1	0.705976	0.245791	0.0482335
AC010531.1	0.690523	0.268272	0.0412058
AC010616.1	0.666421	0.300582	0.0329978
AC010646.1	0.691544	0.29028	0.0181761
AC011005.1	0.679206	0.285824	0.0349702
AC011195.2	0.694083	0.245656	0.060261
AC011448.1	0.673053	0.291861	0.0350863
AC011455.2	0.677183	0.279736	0.0430814
AC011462.1	0.679836	0.277802	0.0423611
AC011479.1	0.682293	0.288278	0.0294289
AC011499.1	0.659812	0.298246	0.0419416
AC011604.2	0.705011	0.243838	0.0511515
AC011604.2_ENST00000381541	0.709921	0.241768	0.0483114
AC012184.2	0.687207	0.268921	0.0438721
AC012476.1	0.694776	0.25691	0.048314
AC012531.3	0.688922	0.267232	0.0438457
AC013394.1	0.711991	0.223627	0.0643824
AC013470.2	0.717133	0.218679	0.0641885
AC013470.2_ENST00000635746	0.720011	0.218719	0.0612702
AC015802.6	0.668226	0.299007	0.0327675
AC015813.2	0.71547	0.252366	0.0321638
AC018554.3	0.686246	0.277704	0.0360502
AC018709.1	0.670238	0.291656	0.0381062
AC018755.2	0.672099	0.284601	0.0433002
AC018755.2_ENST00000429354	0.672099	0.284601	0.0433002
AC019117.3	0.705063	0.238101	0.0568358
AC020909.1	0.671574	0.288195	0.040231
AC021072.1	0.696535	0.270178	0.0332869
AC021097.2	0.667227	0.296266	0.0365067
AC022167.5	0.667304	0.295669	0.0370276
AC022167.5_ENST00000637237	0.667304	0.295669	0.0370276
AC022167.5_ENST00000637929	0.677757	0.290551	0.0316922
AC022414.1	0.703759	0.256342	0.0398994
AC022506.1	0.703685	0.215876	0.0804386
AC023055.1	0.695806	0.256012	0.0481814
AC023509.3	0.691087	0.272294	0.0366188
AC024592.3	0.678992	0.291606	0.0294025
AC025283.2	0.731582	0.248007	0.0204107
AC025287.4	0.693043	0.238837	0.0681206
AC026316.5	0.667183	0.290921	0.0418957
AC026461.4	0.70337	0.273891	0.0227388
AC026464.3	0.675982	0.285383	0.0386342
AC026464.4	0.681394	0.280719	0.0378867
AC026786.1	0.67463	0.264019	0.0613503
AC034102.2	0.717108	0.248989	0.0339021
AC037459.1_ENST00000430850	0.687789	0.27335	0.0388612
AC058822.1	0.705398	0.251108	0.0434943
AC068533.4	0.691217	0.266527	0.042256
AC068580.4	0.672776	0.290405	0.0368191
AC068580.4_ENST00000636615	0.667833	0.298367	0.0337998
AC068631.2	0.68516	0.261802	0.0530378
AC068775.1	0.703279	0.239079	0.0576428
AC068790.8	0.699309	0.260101	0.0405905
AC068987.5	0.690032	0.280332	0.0296361
AC069368.1	0.672981	0.286285	0.0407344
AC073111.3	0.686542	0.274603	0.0388549
AC073111.5	0.705593	0.264186	0.0302207
AC073111.5_ENST00000641717	0.686135	0.278652	0.0352127
AC073111.5_ENST00000642087	0.705593	0.264186	0.0302207
AC073610.2	0.671914	0.2855	0.0425862
AC073610.3	0.685192	0.272746	0.0420621
AC073896.1	0.693321	0.262207	0.0444722
AC078864.2	0.707721	0.266207	0.0260724
AC079341.3	0.688254	0.269181	0.0425648
AC079341.3_ENST00000643802	0.65276	0.304735	0.0425054
AC083800.1	0.691899	0.256504	0.0515969
AC087498.1	0.677601	0.299236	0.0231631
AC090517.4	0.726708	0.218822	0.0544701
AC090527.2	0.67032	0.286013	0.0436671
AC091057.6	0.711106	0.247776	0.0411175
AC091167.6	0.694932	0.236737	0.0683312
AC091959.3	0.700904	0.246008	0.0530886
AC091980.2	0.6805	0.300993	0.0185076
AC092017.3	0.714856	0.230254	0.0548898
AC092073.1_ENST00000606020	0.696798	0.256606	0.046596
AC092143.1	0.678653	0.28743	0.0339174
AC092329.3	0.718919	0.217974	0.0631074
AC092442.1	0.688612	0.255446	0.0559423
AC092587.1	0.72616	0.219085	0.0547555
AC092647.5	0.695291	0.250879	0.0538304
AC092718.3	0.691073	0.258724	0.0502035
AC092718.8	0.692352	0.263239	0.0444095
AC092835.1	0.717106	0.22044	0.0624542
AC093155.3	0.709497	0.235386	0.0551165
AC093323.1	0.700113	0.275317	0.0245706
AC093512.2	0.669357	0.294372	0.036271
AC093512.2_ENST00000338110	0.677411	0.290153	0.032436
AC093512.2_ENST00000395248	0.687265	0.283333	0.0294024
AC093512.2_ENST00000562240	0.665583	0.306762	0.0276544
AC093512.2_ENST00000566897	0.703792	0.253897	0.0423115
AC093512.2_ENST00000568435	0.703792	0.253897	0.0423115
AC093512.2_ENST00000575627	0.712173	0.243028	0.0447993
AC093525.1	0.689764	0.291066	0.01917
AC093525.2	0.675672	0.285845	0.0384832
AC093668.1	0.680533	0.284319	0.0351487
AC093668.3	0.671914	0.295663	0.0324231
AC093827.5	0.693649	0.260533	0.0458181
AC093899.2	0.721578	0.226799	0.051623
AC096582.3	0.678998	0.273717	0.0472848
AC097637.1	0.674861	0.292336	0.0328032
AC098582.1	0.679927	0.261621	0.0584523
AC099489.1	0.678375	0.283037	0.0385882
AC099811.2	0.680354	0.282705	0.0369412
AC099850.2	0.701484	0.253392	0.0451245
AC100868.1	0.702368	0.263034	0.0345987
AC104109.3	0.699387	0.250361	0.0502525
AC104389.5	0.680089	0.289734	0.0301765
AC104389.5_ENST00000642908	0.684106	0.28431	0.0315841
AC104452.1_ENST00000636166	0.68404	0.282885	0.0330744
AC104662.2	0.706041	0.231298	0.0626606
AC106774.10	0.699017	0.261817	0.0391667
AC106774.5	0.702351	0.263484	0.0341646
AC106774.6	0.702837	0.262966	0.034197
AC106774.7	0.702805	0.263031	0.0341646
AC106774.8	0.702153	0.260427	0.0374191
AC106774.9	0.703434	0.262402	0.0341646
AC106782.1	0.67637	0.282999	0.0406306
AC107871.1	0.704026	0.251354	0.0446201
AC107959.5	0.737479	0.238193	0.0243276
AC108488.2	0.72602	0.194007	0.0799723
AC114490.3	0.656213	0.297843	0.0459434
AC115220.1	0.721847	0.215591	0.0625627
AC116366.3	0.708339	0.222021	0.0696407
AC116366.3_ENST00000638452	0.708339	0.222021	0.0696407
AC116366.3_ENST00000638568	0.708339	0.222021	0.0696407
AC116565.1	0.695256	0.279643	0.0251018
AC117457.1	0.686931	0.261396	0.0516731
AC118470.1	0.689187	0.277047	0.0337661
AC118549.1	0.711213	0.211029	0.0777576
AC118549.1_ENST00000370798	0.705799	0.219589	0.0746117
AC118553.2	0.696857	0.248709	0.0544342
AC118553.2_ENST00000638792	0.694963	0.250142	0.0548954
AC119396.1	0.692242	0.265201	0.042557
AC119676.1	0.748264	0.196798	0.0549379
AC126283.2	0.713852	0.230844	0.0553035
AC126755.2	0.698181	0.253258	0.0485618
AC126755.2_ENST00000327792	0.698183	0.25906	0.0427577
AC126755.2_ENST00000531453	0.69477	0.250768	0.0544616
AC126755.2_ENST00000545114	0.69477	0.250768	0.0544616
AC129492.3	0.67278	0.291053	0.0361666
AC131097.2	0.702503	0.260073	0.0374233
AC131097.2_ENST00000401641	0.700256	0.261715	0.0380288
AC131097.2_ENST00000452112	0.700256	0.261715	0.0380288
AC131160.1	0.692786	0.25769	0.049524
AC133555.3	0.675861	0.282999	0.0411396
AC134669.1	0.721442	0.230747	0.047811
AC134980.3	0.684809	0.286832	0.028359
AC135050.2	0.672648	0.279168	0.0481841
AC135068.1	0.679185	0.287462	0.0333539
AC135068.3	0.684104	0.287492	0.0284041
AC135586.2	0.700159	0.250825	0.0490161
AC136428.1	0.674832	0.273926	0.0512419
AC138647.1	0.686333	0.291133	0.0225346
AC138647.1_ENST00000427937	0.684972	0.292426	0.0226019
AC138696.1	0.709403	0.257583	0.0330137
AC138811.2	0.690604	0.260625	0.0487715
AC138969.1	0.698181	0.253258	0.0485618
AC138969.1_ENST00000331436	0.698183	0.25906	0.0427577
AC138969.1_ENST00000541593	0.69477	0.250768	0.0544616
AC139530.2	0.670608	0.297473	0.0319188
AC187653.1	0.683757	0.279595	0.036648
AC233723.1	0.683141	0.283549	0.0333102
AC233724.12	0.711191	0.250058	0.0387512
AC233724.15	0.69885	0.258132	0.0430174
AC233724.16	0.705154	0.259162	0.0356837
AC233724.17	0.702835	0.262549	0.0346157
AC233724.18	0.703393	0.262481	0.0341266
AC233724.19	0.702837	0.262966	0.034197
AC233724.20	0.703343	0.262427	0.0342298
AC233724.6	0.698884	0.260384	0.0407321
AC243547.3	0.646153	0.31276	0.0410877
AC243756.1	0.685375	0.289339	0.0252866
AC243967.1	0.664407	0.279516	0.056077
AC244197.3	0.686084	0.268842	0.0450735
AC244517.10	0.686029	0.282944	0.0310278
AC244517.6	0.720881	0.191299	0.0878195
AC245033.1	0.686756	0.274485	0.0387587
AC245748.1	0.685887	0.251193	0.06292
ACAA1	0.680723	0.291898	0.0273787
ACAA1_ENST00000301810	0.680701	0.290589	0.0287098
ACAA1_ENST00000450296	0.678213	0.294161	0.0276261
ACAA1_ENST00000625927	0.697158	0.273041	0.0298011
ACAA1_ENST00000627515	0.704235	0.258577	0.0371879
ACAA2	0.70129	0.25508	0.0436298
ACAA2_ENST00000587994	0.70391	0.25263	0.0434601
ACAA2_ENST00000589432	0.704665	0.249886	0.0454493
ACACA	0.695218	0.261254	0.0435282
ACACA_ENST00000612895	0.695706	0.260809	0.0434846
ACACA_ENST00000614428	0.694753	0.262171	0.0430757
ACACA_ENST00000614438	0.683047	0.26639	0.0505633
ACACA_ENST00000617649	0.695243	0.261506	0.0432504
ACACB	0.679098	0.283099	0.0378035
ACACB_ENST00000377848	0.679098	0.283099	0.0378035
ACACB_ENST00000377854	0.675724	0.285598	0.0386786
ACAD10	0.683775	0.274155	0.0420706
ACAD10_ENST00000313698	0.685643	0.273144	0.0412133
ACAD10_ENST00000549590	0.68855	0.265625	0.0458259
ACAD11	0.694051	0.25115	0.0547997
ACAD11_ENST00000481970	0.685692	0.252664	0.0616437
ACAD8	0.684362	0.275804	0.0398336
ACAD8_ENST00000374752	0.674693	0.288657	0.0366499
ACAD9	0.680294	0.285906	0.0337997
ACADL	0.704151	0.241056	0.0547931
ACADM	0.702489	0.231615	0.0658959
ACADM_ENST00000370841	0.705023	0.225519	0.0694579
ACADM_ENST00000420607	0.705625	0.224881	0.0694941
ACADM_ENST00000541113	0.706477	0.22598	0.0675433
ACADS	0.681602	0.284159	0.0342387
ACADS_ENST00000411593	0.683076	0.283919	0.0330053
ACADSB	0.689728	0.251545	0.0587268
ACADSB_ENST00000368869	0.687702	0.256534	0.0557644
ACADVL	0.685151	0.282235	0.0326137
ACADVL_ENST00000350303	0.68482	0.283305	0.0318753
ACADVL_ENST00000356839	0.68455	0.28393	0.0315201
ACAN	0.693215	0.269373	0.0374123
ACAN_ENST00000352105	0.693237	0.269496	0.0372675
ACAN_ENST00000558207	0.680337	0.280109	0.0395541
ACAN_ENST00000559004	0.693112	0.269435	0.0374531
ACAN_ENST00000560601	0.693548	0.268985	0.037467
ACAN_ENST00000561243	0.693215	0.269373	0.0374123
ACAN_ENST00000617301	0.693077	0.26937	0.0375526
ACAP1	0.679674	0.283466	0.0368598
ACAP2	0.709992	0.231139	0.058869
ACAP2_ENST00000618471	0.709853	0.232547	0.0575998
ACAP3	0.685421	0.279534	0.0350449
ACAP3_ENST00000353662	0.682569	0.282194	0.0352371
ACAT1	0.717967	0.244714	0.0373186
ACAT1_ENST00000299355	0.702269	0.255362	0.0423684
ACAT2	0.707621	0.253537	0.0388426
ACBD3	0.667978	0.241816	0.0902058
ACBD4	0.688742	0.262505	0.0487537
ACBD4_ENST00000321854	0.682071	0.269622	0.0483069
ACBD4_ENST00000376955	0.685008	0.265746	0.0492456
ACBD4_ENST00000398322	0.682071	0.269622	0.0483069
ACBD4_ENST00000586346	0.688742	0.262505	0.0487537
ACBD4_ENST00000591859	0.688742	0.262505	0.0487537
ACBD4_ENST00000592162	0.685125	0.271725	0.0431503
ACBD4_ENST00000619916	0.685008	0.265746	0.0492456
ACBD5	0.715615	0.223681	0.0607035
ACBD5_ENST00000375888	0.714632	0.224023	0.0613446
ACBD5_ENST00000375897	0.715897	0.222889	0.061214
ACBD5_ENST00000375901	0.717825	0.223369	0.0588057
ACBD5_ENST00000375905	0.717098	0.223996	0.0589053
ACBD6	0.683186	0.257282	0.0595317
ACBD6_ENST00000367595	0.683186	0.257282	0.0595317
ACBD7	0.695776	0.247393	0.0568311
ACCS	0.682046	0.275938	0.0420154
ACCSL	0.683844	0.275725	0.040431
ACD	0.685867	0.279524	0.0346091
ACD_ENST00000219251	0.686191	0.279354	0.0344543
ACD_ENST00000393919	0.685867	0.279524	0.0346091
ACD_ENST00000602320	0.68536	0.277434	0.0372053
ACD_ENST00000620761	0.685579	0.277258	0.0371627
ACE	0.670764	0.282555	0.0466811
ACE_ENST00000290863	0.675932	0.279271	0.0447967
ACE_ENST00000413513	0.677387	0.277916	0.0446968
ACE_ENST00000428043	0.670388	0.282076	0.0475351
ACE2	0.701191	0.240775	0.0580343
ACE2_ENST00000252519	0.701191	0.240775	0.0580343
ACER1	0.6748	0.285419	0.0397816
ACER2	0.663687	0.289135	0.0471783
ACER3	0.68542	0.257851	0.0567287
ACER3_ENST00000526597	0.688701	0.255125	0.0561743
ACER3_ENST00000533873	0.681218	0.25866	0.0601212
ACHE	0.672255	0.292245	0.0354996
ACHE_ENST00000241069	0.672796	0.287386	0.0398177
ACHE_ENST00000411582	0.672255	0.292245	0.0354996
ACHE_ENST00000412389	0.672796	0.287386	0.0398177
ACHE_ENST00000419336	0.66923	0.288462	0.042308
ACHE_ENST00000428317	0.672796	0.287386	0.0398177
ACIN1	0.695818	0.25293	0.0512515
ACIN1_ENST00000338631	0.691586	0.261759	0.0466555
ACIN1_ENST00000357481	0.690994	0.260294	0.0487123
ACIN1_ENST00000397341	0.690994	0.260294	0.0487123
ACIN1_ENST00000457657	0.695623	0.252668	0.0517092
ACIN1_ENST00000555053	0.69653	0.252127	0.0513431
ACIN1_ENST00000557515	0.691633	0.260071	0.0482968
ACIN1_ENST00000605057	0.695717	0.252581	0.0517019
ACKR1	0.655252	0.315991	0.0287571
ACKR1_ENST00000368122	0.654802	0.316975	0.0282239
ACKR1_ENST00000537147	0.654802	0.316975	0.0282239
ACKR2	0.682695	0.281238	0.0360667
ACKR2_ENST00000442925	0.682695	0.281238	0.0360667
ACKR3	0.661845	0.300652	0.0375029
ACKR4	0.692585	0.260212	0.0472036
ACLY	0.682287	0.283715	0.0339981
ACLY_ENST00000353196	0.682299	0.284049	0.0336512
ACLY_ENST00000393896	0.682299	0.284049	0.0336512
ACLY_ENST00000537919	0.686258	0.279893	0.0338494
ACLY_ENST00000590151	0.682287	0.283715	0.0339981
ACMSD	0.693936	0.259382	0.0466816
ACMSD_ENST00000392928	0.691029	0.265462	0.0435098
ACO1	0.687725	0.272411	0.0398649
ACO1_ENST00000379923	0.687725	0.272411	0.0398649
ACO1_ENST00000541043	0.687725	0.272411	0.0398649
ACO2	0.670274	0.295784	0.0339417
ACO2_ENST00000396512	0.671912	0.294063	0.0340249
ACOD1	0.695075	0.27205	0.0328746
ACOD1_ENST00000449753	0.693283	0.273649	0.0330677
ACOT1	0.675012	0.293119	0.0318686
ACOT1_ENST00000557556	0.674482	0.292768	0.0327498
ACOT11	0.677601	0.283341	0.0390576
ACOT11_ENST00000343744	0.678928	0.283332	0.0377402
ACOT12	0.712257	0.245754	0.041988
ACOT12_ENST00000513751	0.720236	0.239734	0.04003
ACOT13	0.713951	0.250881	0.0351681
ACOT13_ENST00000537591	0.717013	0.246173	0.0368138
ACOT2	0.677839	0.288259	0.0339024
ACOT2_ENST00000613168	0.674411	0.291357	0.0342323
ACOT2_ENST00000622407	0.677047	0.291111	0.0318419
ACOT4	0.67333	0.287151	0.0395195
ACOT6	0.709532	0.244059	0.046409
ACOT6_ENST00000645972	0.691222	0.27333	0.0354475
ACOT7	0.677635	0.290998	0.0313669
ACOT7_ENST00000361521	0.679178	0.290898	0.0299247
ACOT7_ENST00000377842	0.676474	0.291142	0.0323838
ACOT7_ENST00000377845	0.677788	0.28941	0.0328021
ACOT7_ENST00000545482	0.679178	0.290898	0.0299247
ACOT7_ENST00000608083	0.675496	0.291926	0.0325777
ACOT8	0.683852	0.271385	0.044763
ACOT9	0.71377	0.243817	0.0424137
ACOT9_ENST00000336430	0.712486	0.245114	0.0424005
ACOT9_ENST00000379295	0.717468	0.240589	0.0419438
ACOT9_ENST00000492081	0.725817	0.23246	0.0417232
ACOX1	0.693853	0.265606	0.0405412
ACOX1_ENST00000301608	0.691636	0.266104	0.0422592
ACOX2	0.677351	0.276192	0.0464566
ACOX2_ENST00000459701	0.676706	0.276295	0.0469991
ACOX3	0.67606	0.284552	0.0393878
ACOX3_ENST00000413009	0.678737	0.283135	0.0381281
ACOX3_ENST00000503233	0.67606	0.284552	0.0393878
ACOXL	0.681679	0.278375	0.0399465
ACOXL_ENST00000340561	0.696812	0.26571	0.0374778
ACOXL_ENST00000389811	0.690054	0.268062	0.0418848
ACP1	0.714852	0.231541	0.053607
ACP1_ENST00000272065	0.710794	0.233124	0.0560821
ACP1_ENST00000405233	0.665326	0.277224	0.0574508
ACP1_ENST00000407983	0.686807	0.267201	0.045992
ACP1_ENST00000439645	0.702861	0.258137	0.0390024
ACP2	0.680116	0.275097	0.0447869
ACP2_ENST00000527256	0.681947	0.27624	0.0418135
ACP2_ENST00000529444	0.678609	0.276279	0.0451117
ACP2_ENST00000530453	0.687859	0.268782	0.0433589
ACP2_ENST00000533929	0.679127	0.273166	0.0477077
ACP4	0.664614	0.306036	0.0293501
ACP5	0.668625	0.291237	0.0401377
ACP5_ENST00000218758	0.668625	0.291237	0.0401377
ACP5_ENST00000412435	0.668625	0.291237	0.0401377
ACP5_ENST00000433365	0.668625	0.291237	0.0401377
ACP5_ENST00000590420	0.663283	0.279552	0.0571651
ACP6	0.681732	0.273021	0.0452474
ACP6_ENST00000392988	0.681132	0.279582	0.0392859
ACP6_ENST00000487562	0.675266	0.279193	0.0455409
ACP7	0.677254	0.27715	0.0455962
ACP7_ENST00000594229	0.689102	0.268636	0.0422616
ACPP	0.687306	0.263392	0.0493017
ACPP_ENST00000336375	0.692669	0.256937	0.0503945
ACPP_ENST00000475741	0.697147	0.253933	0.0489193
ACR	0.673552	0.28225	0.0441976
ACR_ENST00000529621	0.680865	0.277744	0.0413912
ACRBP	0.683672	0.261196	0.0551318
ACRBP_ENST00000414226	0.685339	0.260645	0.0540158
ACRBP_ENST00000536350	0.68048	0.259538	0.0599821
ACRV1	0.708184	0.227258	0.0645581
ACRV1_ENST00000315608	0.709344	0.226493	0.0641637
ACRV1_ENST00000527795	0.698753	0.228455	0.0727923
ACRV1_ENST00000530048	0.702471	0.227917	0.0696118
ACSBG1	0.674896	0.279774	0.0453301
ACSBG1_ENST00000560817	0.677952	0.277354	0.0446941
ACSBG2	0.679597	0.276895	0.0435086
ACSBG2_ENST00000588304	0.676426	0.280277	0.0432963
ACSBG2_ENST00000588485	0.684028	0.273835	0.0421372
ACSBG2_ENST00000591403	0.679597	0.276895	0.0435086
ACSF2	0.676902	0.284708	0.0383908
ACSF2_ENST00000300441	0.674981	0.286113	0.0389056
ACSF2_ENST00000502667	0.67599	0.285102	0.0389079
ACSF2_ENST00000504392	0.675059	0.285961	0.0389808
ACSF3	0.677579	0.282235	0.0401854
ACSF3_ENST00000317447	0.677579	0.282235	0.0401854
ACSF3_ENST00000378345	0.672235	0.280479	0.0472868
ACSF3_ENST00000406948	0.677579	0.282235	0.0401854
ACSL1	0.691063	0.263545	0.0453924
ACSL1_ENST00000281455	0.691063	0.263545	0.0453924
ACSL1_ENST00000454703	0.696467	0.263325	0.0402086
ACSL1_ENST00000504342	0.691063	0.263545	0.0453924
ACSL1_ENST00000504900	0.695881	0.259552	0.044567
ACSL1_ENST00000507295	0.692806	0.262314	0.0448805
ACSL1_ENST00000513317	0.689149	0.264213	0.0466386
ACSL1_ENST00000622937	0.696467	0.263325	0.0402086
ACSL3	0.701403	0.246663	0.0519338
ACSL3_ENST00000392066	0.701403	0.246663	0.0519338
ACSL4	0.704861	0.251031	0.0441083
ACSL4_ENST00000348502	0.706154	0.24922	0.0446266
ACSL4_ENST00000469796	0.704861	0.251031	0.0441083
ACSL5	0.679151	0.275274	0.0455757
ACSL5_ENST00000354273	0.680184	0.273738	0.0460781
ACSL5_ENST00000354655	0.680184	0.273738	0.0460781
ACSL5_ENST00000393081	0.680184	0.273738	0.0460781
ACSL5_ENST00000433418	0.678447	0.27612	0.0454333
ACSL6	0.681653	0.274258	0.044089
ACSL6_ENST00000296869	0.682904	0.271939	0.045157
ACSL6_ENST00000357096	0.682126	0.273006	0.0448675
ACSL6_ENST00000379240	0.682303	0.2734	0.0442976
ACSL6_ENST00000379244	0.683605	0.270988	0.0454069
ACSL6_ENST00000379246	0.682509	0.273155	0.0443368
ACSL6_ENST00000379255	0.682126	0.273006	0.0448675
ACSL6_ENST00000431707	0.683049	0.272821	0.0441297
ACSL6_ENST00000543479	0.682824	0.272527	0.044649
ACSM1	0.676241	0.274108	0.0496508
ACSM1_ENST00000520010	0.676241	0.274108	0.0496508
ACSM2A	0.682	0.269906	0.0480946
ACSM2A_ENST00000219054	0.682	0.269906	0.0480946
ACSM2A_ENST00000396104	0.682	0.269906	0.0480946
ACSM2A_ENST00000417235	0.681889	0.273152	0.0449583
ACSM2A_ENST00000575690	0.682	0.269906	0.0480946
ACSM2B	0.680926	0.270636	0.0484385
ACSM2B_ENST00000414188	0.680926	0.270636	0.0484385
ACSM2B_ENST00000565232	0.680926	0.270636	0.0484385
ACSM2B_ENST00000565322	0.680653	0.27399	0.0453568
ACSM2B_ENST00000567001	0.680926	0.270636	0.0484385
ACSM3	0.697115	0.249637	0.0532477
ACSM3_ENST00000440284	0.69608	0.254891	0.0490287
ACSM4	0.693105	0.256662	0.0502324
ACSM5	0.680202	0.276885	0.042913
ACSM5_ENST00000575070	0.668725	0.293911	0.0373635
ACSM5_ENST00000575584	0.67739	0.283216	0.0393943
ACSM6	0.68356	0.266224	0.0502159
ACSM6_ENST00000394005	0.68356	0.266224	0.0502159
ACSS1	0.679421	0.286031	0.0345477
ACSS1_ENST00000376726	0.677111	0.283939	0.0389505
ACSS1_ENST00000432802	0.67975	0.28313	0.0371194
ACSS1_ENST00000537502	0.681437	0.283896	0.0346666
ACSS2	0.686196	0.269303	0.0445005
ACSS2_ENST00000360596	0.686685	0.269004	0.0443104
ACSS3	0.695674	0.257584	0.0467423
ACSS3_ENST00000261206	0.695802	0.258017	0.0461809
ACTA1	0.667061	0.299146	0.0337928
ACTA1_ENST00000366683	0.66873	0.299925	0.0313449
ACTA2	0.685791	0.276808	0.0374006
ACTB	0.68225	0.287347	0.0304027
ACTB_ENST00000493945	0.68225	0.287347	0.0304027
ACTB_ENST00000646664	0.68225	0.287347	0.0304027
ACTBL2	0.68969	0.275364	0.0349458
ACTC1	0.688018	0.27875	0.0332329
ACTG1	0.677437	0.287067	0.0354962
ACTG1_ENST00000331925	0.677437	0.287067	0.0354962
ACTG1_ENST00000573283	0.677437	0.287067	0.0354962
ACTG1_ENST00000575087	0.677437	0.287067	0.0354962
ACTG1_ENST00000615544	0.677437	0.287067	0.0354962
ACTG1_ENST00000644774	0.677437	0.287067	0.0354962
ACTG2	0.687942	0.278408	0.0336493
ACTG2_ENST00000345517	0.687942	0.278408	0.0336493
ACTG2_ENST00000409731	0.687612	0.28035	0.0320379
ACTG2_ENST00000409918	0.699408	0.267896	0.0326954
ACTL10	0.685271	0.28606	0.0286691
ACTL6A	0.718164	0.229749	0.0520869
ACTL6A_ENST00000392662	0.717979	0.227254	0.0547665
ACTL6A_ENST00000450518	0.717979	0.227254	0.0547665
ACTL6B	0.677008	0.284017	0.0389756
ACTL7A	0.680086	0.278077	0.0418376
ACTL7B	0.682822	0.285019	0.0321593
ACTL8	0.676916	0.281542	0.0415419
ACTL8_ENST00000617065	0.676916	0.281542	0.0415419
ACTL9	0.671646	0.29484	0.0335148
ACTL9_ENST00000612068	0.671646	0.29484	0.0335148
ACTN1	0.676769	0.281288	0.0419426
ACTN1_ENST00000193403	0.675265	0.282225	0.0425098
ACTN1_ENST00000376839	0.674224	0.284514	0.0412621
ACTN1_ENST00000438964	0.676165	0.281358	0.042477
ACTN1_ENST00000538545	0.675823	0.282142	0.0420344
ACTN2	0.674361	0.2724	0.053239
ACTN2_ENST00000366578	0.672931	0.274034	0.0530347
ACTN2_ENST00000546208	0.672927	0.271251	0.0558219
ACTN3	0.675257	0.283633	0.0411105
ACTN3_ENST00000513398	0.6747	0.282653	0.0426475
ACTN4	0.678679	0.280671	0.0406493
ACTN4_ENST00000390009	0.680694	0.276785	0.0425213
ACTN4_ENST00000424234	0.682262	0.277161	0.0405773
ACTR10	0.702874	0.25177	0.0453567
ACTR1A	0.674563	0.284702	0.0407348
ACTR1A_ENST00000487599	0.677597	0.281024	0.0413798
ACTR1B	0.672598	0.290742	0.0366598
ACTR2	0.698523	0.253337	0.0481401
ACTR2_ENST00000260641	0.698035	0.253538	0.0484275
ACTR2_ENST00000542850	0.700348	0.247909	0.0517424
ACTR3	0.702508	0.243877	0.0536154
ACTR3_ENST00000415792	0.663483	0.299177	0.0373407
ACTR3_ENST00000535589	0.706138	0.239175	0.0546872
ACTR3B	0.68675	0.265282	0.0479682
ACTR3B_ENST00000377776	0.687681	0.261504	0.0508145
ACTR3B_ENST00000397282	0.683918	0.268779	0.0473032
ACTR3C	0.674434	0.271863	0.0537026
ACTR3C_ENST00000539352	0.674209	0.274177	0.0516141
ACTR3C_ENST00000613959	0.68711	0.238378	0.0745119
ACTR5	0.678601	0.274454	0.0469448
ACTR6	0.715977	0.221653	0.0623704
ACTR6_ENST00000546902	0.726463	0.214262	0.0592752
ACTR6_ENST00000551617	0.728254	0.210764	0.0609821
ACTR6_ENST00000552376	0.716754	0.219381	0.0638653
ACTR8	0.695006	0.251358	0.0536356
ACTR8_ENST00000482349	0.701514	0.246581	0.0519049
ACTRT1	0.691736	0.27029	0.0379736
ACTRT2	0.674894	0.290464	0.0346421
ACTRT3	0.686802	0.271601	0.0415965
ACVR1	0.69947	0.252777	0.0477524
ACVR1_ENST00000409283	0.69947	0.252777	0.0477524
ACVR1_ENST00000410057	0.69947	0.252777	0.0477524
ACVR1_ENST00000434821	0.69947	0.252777	0.0477524
ACVR1B	0.689091	0.268794	0.0421151
ACVR1B_ENST00000257963	0.69078	0.268132	0.0410877
ACVR1B_ENST00000415850	0.690061	0.270215	0.039724
ACVR1B_ENST00000426655	0.692229	0.265773	0.041998
ACVR1B_ENST00000542485	0.6899	0.267058	0.0430424
ACVR1C	0.697655	0.251271	0.0510748
ACVR1C_ENST00000335450	0.699339	0.2475	0.0531609
ACVR1C_ENST00000348328	0.699989	0.247523	0.0524876
ACVR1C_ENST00000409680	0.700325	0.24891	0.0507654
ACVR2A	0.71482	0.233445	0.0517352
ACVR2A_ENST00000404590	0.71482	0.233445	0.0517352
ACVR2A_ENST00000535787	0.710159	0.238871	0.0509696
ACVR2B	0.679779	0.277392	0.0428293
ACVRL1	0.678243	0.284532	0.0372245
ACVRL1_ENST00000419526	0.674546	0.286854	0.0386003
ACVRL1_ENST00000550683	0.678801	0.28494	0.0362588
ACY1	0.690456	0.276227	0.0333169
ACY1_ENST00000404366	0.690456	0.276227	0.0333169
ACY1_ENST00000476351	0.692803	0.274366	0.0328303
ACY1_ENST00000476854	0.692725	0.272866	0.0344091
ACY1_ENST00000494103	0.691576	0.275412	0.0330121
ACY1_ENST00000635797	0.693104	0.271952	0.0349442
ACY3	0.679827	0.289084	0.0310892
ACY3_ENST00000529256	0.674507	0.290341	0.0351518
ACYP1	0.666431	0.279456	0.054113
ACYP1_ENST00000238618	0.668871	0.262152	0.0689763
ACYP1_ENST00000357971	0.729365	0.228392	0.0422432
ACYP1_ENST00000553302	0.68016	0.257439	0.0624003
ACYP1_ENST00000555135	0.732423	0.22394	0.0436376
ACYP1_ENST00000555694	0.668871	0.262152	0.0689763
ACYP2	0.696684	0.244248	0.0590679
ACYP2_ENST00000303536	0.698375	0.257356	0.044269
ACYP2_ENST00000394666	0.70804	0.239716	0.0522439
ACYP2_ENST00000406041	0.698498	0.263457	0.0380449
ACYP2_ENST00000422521	0.679868	0.259261	0.0608715
ACYP2_ENST00000606082	0.720772	0.245198	0.0340299
ACYP2_ENST00000606865	0.71305	0.234336	0.0526137
ADA	0.680128	0.281351	0.0385215
ADA_ENST00000537820	0.677138	0.2834	0.0394628
ADA2	0.689238	0.276048	0.0347139
ADA2_ENST00000262607	0.689238	0.276048	0.0347139
ADA2_ENST00000330232	0.691725	0.270236	0.0380394
ADA2_ENST00000399839	0.689238	0.276048	0.0347139
ADA2_ENST00000449907	0.690521	0.273924	0.0355545
ADA2_ENST00000610390	0.686438	0.274826	0.0387358
ADAD1	0.707943	0.231981	0.0600764
ADAD1_ENST00000388724	0.710144	0.230793	0.0590634
ADAD1_ENST00000388725	0.707532	0.23266	0.059808
ADAD2	0.669497	0.295197	0.0353059
ADAD2_ENST00000315906	0.668812	0.29865	0.0325373
ADAL	0.711482	0.241065	0.0474524
ADAL_ENST00000389651	0.717717	0.238258	0.0440248
ADAL_ENST00000422466	0.715231	0.238433	0.0463357
ADAL_ENST00000428046	0.715231	0.238433	0.0463357
ADAL_ENST00000610420	0.717717	0.238258	0.0440248
ADAM10	0.722264	0.22752	0.0502165
ADAM10_ENST00000402627	0.705424	0.242848	0.0517287
ADAM10_ENST00000461408	0.680225	0.27994	0.0398344
ADAM10_ENST00000561288	0.691097	0.265394	0.043509
ADAM11	0.679753	0.283321	0.0369262
ADAM11_ENST00000535346	0.688225	0.276161	0.0356138
ADAM12	0.692594	0.267809	0.0395975
ADAM12_ENST00000368676	0.697897	0.260685	0.0414182
ADAM15	0.67761	0.28798	0.0344107
ADAM15_ENST00000271836	0.677919	0.286201	0.0358798
ADAM15_ENST00000355956	0.678258	0.286678	0.0350634
ADAM15_ENST00000359280	0.677219	0.28759	0.0351906
ADAM15_ENST00000360674	0.681167	0.28156	0.0372733
ADAM15_ENST00000368412	0.680467	0.283066	0.0364668
ADAM15_ENST00000368413	0.680194	0.281973	0.037833
ADAM15_ENST00000447332	0.682663	0.281489	0.0358479
ADAM15_ENST00000449910	0.677503	0.288236	0.0342609
ADAM15_ENST00000531455	0.677012	0.28706	0.0359277
ADAM17	0.712745	0.23755	0.0497059
ADAM17_ENST00000497134	0.713607	0.234857	0.0515354
ADAM17_ENST00000618923	0.717776	0.235295	0.0469283
ADAM18	0.721531	0.220534	0.0579346
ADAM18_ENST00000379866	0.71975	0.22197	0.0582803
ADAM18_ENST00000520772	0.706305	0.228072	0.0656236
ADAM19	0.685949	0.273727	0.0403245
ADAM19_ENST00000517905	0.687325	0.27239	0.040285
ADAM2	0.725529	0.212663	0.0618088
ADAM2_ENST00000347580	0.725397	0.213705	0.060898
ADAM2_ENST00000379853	0.725903	0.212636	0.0614615
ADAM2_ENST00000521880	0.72483	0.213186	0.0619839
ADAM2_ENST00000622267	0.72483	0.213186	0.0619839
ADAM20	0.711434	0.239314	0.0492528
ADAM21	0.710168	0.241061	0.0487719
ADAM22	0.709058	0.240701	0.0502416
ADAM22_ENST00000398201	0.710099	0.240085	0.0498156
ADAM22_ENST00000398204	0.708703	0.240635	0.0506629
ADAM22_ENST00000398209	0.708344	0.240204	0.0514525
ADAM22_ENST00000439864	0.70259	0.25111	0.0463005
ADAM23	0.699789	0.252351	0.0478599
ADAM23_ENST00000374415	0.700172	0.251653	0.048175
ADAM28	0.720908	0.23394	0.0451519
ADAM28_ENST00000437154	0.725668	0.231237	0.0430946
ADAM29	0.71555	0.235776	0.0486732
ADAM29_ENST00000359240	0.71555	0.235776	0.0486732
ADAM29_ENST00000404450	0.71555	0.235776	0.0486732
ADAM29_ENST00000445694	0.71555	0.235776	0.0486732
ADAM29_ENST00000514159	0.71555	0.235776	0.0486732
ADAM29_ENST00000618444	0.71555	0.235776	0.0486732
ADAM30	0.700063	0.232591	0.0673461
ADAM32	0.713523	0.221814	0.0646634
ADAM32_ENST00000437682	0.714702	0.221306	0.0639913
ADAM32_ENST00000519315	0.712693	0.222664	0.0646433
ADAM33	0.692055	0.271438	0.0365073
ADAM33_ENST00000350009	0.691029	0.272579	0.0363926
ADAM33_ENST00000379861	0.692207	0.271239	0.0365541
ADAM33_ENST00000617732	0.66663	0.290845	0.0425246
ADAM33_ENST00000619289	0.688667	0.273215	0.038118
ADAM7	0.704752	0.242977	0.0522703
ADAM7_ENST00000380789	0.704127	0.243527	0.0523463
ADAM7_ENST00000441335	0.703413	0.242096	0.0544915
ADAM7_ENST00000520720	0.705882	0.241469	0.0526481
ADAM8	0.687636	0.280272	0.0320924
ADAM8_ENST00000415217	0.696735	0.267293	0.0359716
ADAM8_ENST00000485491	0.685226	0.28206	0.0327132
ADAM9	0.707456	0.244866	0.0476779
ADAM9_ENST00000466936	0.701399	0.239264	0.0593378
ADAM9_ENST00000481513	0.715131	0.234889	0.0499796
ADAMDEC1	0.701273	0.252524	0.0462035
ADAMDEC1_ENST00000522298	0.702436	0.255325	0.0422391
ADAMTS1	0.696753	0.259586	0.0436611
ADAMTS10	0.687104	0.275449	0.0374476
ADAMTS10_ENST00000595838	0.689925	0.274236	0.0358391
ADAMTS10_ENST00000597188	0.687104	0.275449	0.0374476
ADAMTS12	0.698846	0.253848	0.0473058
ADAMTS12_ENST00000352040	0.697446	0.254685	0.0478685
ADAMTS12_ENST00000515401	0.69366	0.260582	0.0457584
ADAMTS13	0.688434	0.273109	0.0384567
ADAMTS13_ENST00000355699	0.689345	0.272118	0.038537
ADAMTS13_ENST00000356589	0.68975	0.272078	0.038172
ADAMTS13_ENST00000371910	0.686895	0.268444	0.0446606
ADAMTS13_ENST00000371911	0.688566	0.285074	0.0263605
ADAMTS13_ENST00000371916	0.696284	0.266813	0.0369031
ADAMTS14	0.687575	0.272787	0.0396385
ADAMTS14_ENST00000373207	0.687512	0.273063	0.0394248
ADAMTS15	0.681823	0.282907	0.0352701
ADAMTS16	0.692476	0.26016	0.0473647
ADAMTS16_ENST00000511368	0.696382	0.259398	0.0442196
ADAMTS17	0.687385	0.269723	0.0428919
ADAMTS18	0.684907	0.259035	0.0560579
ADAMTS19	0.702423	0.244991	0.0525866
ADAMTS19_ENST00000274487	0.702501	0.245084	0.0524148
ADAMTS2	0.691502	0.272374	0.0361234
ADAMTS2_ENST00000274609	0.689667	0.280786	0.0295474
ADAMTS20	0.714941	0.222795	0.0622644
ADAMTS20_ENST00000395541	0.715107	0.224236	0.0606562
ADAMTS20_ENST00000553158	0.714756	0.224047	0.0611969
ADAMTS3	0.70942	0.241273	0.0493076
ADAMTS3_ENST00000622135	0.70942	0.241273	0.0493076
ADAMTS4	0.675038	0.290405	0.0345567
ADAMTS4_ENST00000367995	0.658422	0.307816	0.0337621
ADAMTS5	0.683882	0.274782	0.0413356
ADAMTS6	0.70962	0.237191	0.0531892
ADAMTS7	0.689082	0.27338	0.0375376
ADAMTS8	0.684483	0.279692	0.0358257
ADAMTS9	0.703943	0.242684	0.0533723
ADAMTS9_ENST00000295903	0.703757	0.242715	0.0535277
ADAMTS9_ENST00000459780	0.702155	0.254724	0.0431212
ADAMTSL1	0.683972	0.271778	0.0442502
ADAMTSL1_ENST00000276935	0.689107	0.262448	0.0484455
ADAMTSL1_ENST00000327883	0.689876	0.259024	0.0511
ADAMTSL1_ENST00000380545	0.683965	0.269694	0.0463414
ADAMTSL1_ENST00000380566	0.69245	0.259006	0.0485445
ADAMTSL1_ENST00000380570	0.688256	0.263956	0.0477875
ADAMTSL1_ENST00000431052	0.69622	0.253389	0.0503913
ADAMTSL2	0.694377	0.265659	0.0399636
ADAMTSL2_ENST00000393060	0.694377	0.265659	0.0399636
ADAMTSL2_ENST00000393061	0.692377	0.268707	0.0389163
ADAMTSL3	0.700555	0.246549	0.052896
ADAMTSL3_ENST00000567476	0.699868	0.247944	0.0521888
ADAMTSL4	0.687058	0.272484	0.0404579
ADAMTSL4_ENST00000271643	0.687325	0.271474	0.0412009
ADAMTSL4_ENST00000369038	0.687325	0.271474	0.0412009
ADAMTSL4_ENST00000369041	0.684743	0.276055	0.0392016
ADAMTSL5	0.678962	0.281523	0.0395145
ADAMTSL5_ENST00000395467	0.661461	0.298715	0.0398237
ADAP1	0.671794	0.280871	0.0473354
ADAP1_ENST00000265846	0.671589	0.283685	0.0447259
ADAP1_ENST00000449296	0.668714	0.285322	0.0459643
ADAP1_ENST00000611167	0.668714	0.285322	0.0459643
ADAP1_ENST00000617043	0.665176	0.287458	0.0473657
ADAP2	0.673293	0.279433	0.047274
ADAP2_ENST00000580525	0.673374	0.279513	0.0471137
ADAR	0.684713	0.265517	0.0497697
ADAR_ENST00000368471	0.686405	0.267355	0.0462404
ADARB1	0.685311	0.280412	0.0342768
ADARB1_ENST00000348831	0.686926	0.280851	0.0322231
ADARB1_ENST00000389863	0.686979	0.279314	0.0337064
ADARB1_ENST00000437626	0.685311	0.280412	0.0342768
ADARB1_ENST00000611195	0.73687	0.229473	0.0336571
ADARB1_ENST00000629643	0.687185	0.279792	0.0330235
ADARB2	0.68759	0.284228	0.028182
ADARB2_ENST00000381305	0.69072	0.274098	0.0351819
ADARB2_ENST00000381310	0.686459	0.282561	0.03098
ADAT1	0.690767	0.2591	0.0501332
ADAT2	0.711602	0.240959	0.047439
ADAT2_ENST00000606514	0.705428	0.244991	0.0495809
ADAT3	0.695391	0.276638	0.0279704
ADCK1	0.674613	0.28682	0.0385673
ADCK1_ENST00000341211	0.675207	0.286557	0.0382359
ADCK2	0.676733	0.289932	0.0333356
ADCK2_ENST00000476491	0.675035	0.289512	0.035453
ADCK5	0.683875	0.284401	0.0317241
ADCY1	0.676304	0.291028	0.0326682
ADCY1_ENST00000432715	0.684008	0.279623	0.0363691
ADCY1_ENST00000621543	0.684008	0.279623	0.0363691
ADCY10	0.68269	0.26211	0.0552
ADCY10_ENST00000367848	0.681566	0.262475	0.0559599
ADCY10_ENST00000476818	0.737442	0.213284	0.0492741
ADCY10_ENST00000545172	0.683943	0.260223	0.055834
ADCY2	0.678333	0.281699	0.0399681
ADCY3	0.672674	0.292838	0.0344876
ADCY3_ENST00000260600	0.672523	0.292953	0.0345237
ADCY4	0.667248	0.296738	0.0360133
ADCY4_ENST00000418030	0.667248	0.296738	0.0360133
ADCY4_ENST00000554068	0.667248	0.296738	0.0360133
ADCY5	0.681531	0.287899	0.0305698
ADCY5_ENST00000309879	0.677112	0.290155	0.0327328
ADCY5_ENST00000491190	0.677595	0.289416	0.0329896
ADCY6	0.678771	0.289592	0.0316369
ADCY6_ENST00000357869	0.677804	0.290213	0.0319824
ADCY6_ENST00000550422	0.677804	0.290213	0.0319824
ADCY7	0.677791	0.290042	0.0321675
ADCY7_ENST00000254235	0.677791	0.290042	0.0321675
ADCY7_ENST00000537579	0.675322	0.292683	0.0319955
ADCY7_ENST00000566433	0.681061	0.289574	0.0293653
ADCY8	0.674475	0.285157	0.0403675
ADCY8_ENST00000377928	0.675789	0.283723	0.0404881
ADCY9	0.681266	0.282401	0.0363328
ADCYAP1	0.678827	0.284839	0.0363337
ADCYAP1_ENST00000450565	0.678827	0.284839	0.0363337
ADCYAP1R1	0.678893	0.276613	0.0444945
ADCYAP1R1_ENST00000304166	0.678988	0.278069	0.0429428
ADCYAP1R1_ENST00000396211	0.678893	0.276613	0.0444945
ADCYAP1R1_ENST00000409363	0.677551	0.280265	0.0421833
ADCYAP1R1_ENST00000409489	0.677858	0.27702	0.0451217
ADD1	0.693168	0.267511	0.0393212
ADD1_ENST00000355842	0.692091	0.265504	0.0424048
ADD1_ENST00000398123	0.689826	0.267552	0.0426223
ADD1_ENST00000398125	0.689826	0.267552	0.0426223
ADD1_ENST00000398129	0.693202	0.267222	0.0395756
ADD1_ENST00000446856	0.694999	0.26342	0.0415801
ADD1_ENST00000503455	0.689755	0.267694	0.0425509
ADD1_ENST00000513328	0.689695	0.267297	0.0430083
ADD2	0.689431	0.271273	0.0392958
ADD2_ENST00000355733	0.687567	0.271018	0.0414147
ADD2_ENST00000407644	0.689431	0.271273	0.0392958
ADD2_ENST00000413157	0.687297	0.274776	0.0379273
ADD2_ENST00000430656	0.688283	0.27421	0.0375067
ADD3	0.704279	0.242995	0.052726
ADD3_ENST00000277900	0.705075	0.245752	0.0491724
ADD3_ENST00000360162	0.705075	0.245752	0.0491724
ADGB	0.705092	0.237741	0.0571674
ADGRA1	0.681707	0.284596	0.0336969
ADGRA1_ENST00000392606	0.683943	0.279981	0.0360762
ADGRA1_ENST00000607359	0.680676	0.283564	0.0357602
ADGRA2	0.679017	0.290396	0.0305875
ADGRA2_ENST00000315215	0.680192	0.289532	0.030276
ADGRA3	0.697175	0.257092	0.0457332
ADGRA3_ENST00000502482	0.693666	0.261315	0.0450191
ADGRA3_ENST00000508133	0.709412	0.244371	0.0462175
ADGRB1	0.683319	0.281503	0.0351781
ADGRB1_ENST00000323289	0.683319	0.281503	0.0351781
ADGRB1_ENST00000643448	0.683363	0.281394	0.0352431
ADGRB2	0.677307	0.285988	0.0367055
ADGRB2_ENST00000373658	0.677282	0.286013	0.0367053
ADGRB2_ENST00000398538	0.676664	0.287001	0.0363343
ADGRB2_ENST00000398542	0.67496	0.289387	0.0356525
ADGRB2_ENST00000398547	0.67661	0.287216	0.0361734
ADGRB2_ENST00000398556	0.676886	0.287109	0.0360048
ADGRB2_ENST00000527361	0.676852	0.286469	0.0366799
ADGRB3	0.708742	0.234854	0.0564037
ADGRB3_ENST00000238918	0.710671	0.240316	0.0490128
ADGRB3_ENST00000546190	0.708742	0.234854	0.0564037
ADGRD1	0.675848	0.285998	0.0381537
ADGRD1_ENST00000261654	0.675402	0.286186	0.0384118
ADGRD1_ENST00000335486	0.679622	0.290686	0.0296921
ADGRD1_ENST00000543617	0.674596	0.290325	0.0350789
ADGRD2	0.680371	0.284258	0.0353703
ADGRE1	0.689829	0.268771	0.0413999
ADGRE1_ENST00000250572	0.692349	0.264629	0.0430223
ADGRE1_ENST00000381404	0.687773	0.270987	0.0412405
ADGRE1_ENST00000381407	0.684243	0.274764	0.0409935
ADGRE1_ENST00000450315	0.682803	0.276984	0.0402133
ADGRE2	0.682315	0.277915	0.0397702
ADGRE2_ENST00000392965	0.680188	0.280428	0.0393835
ADGRE2_ENST00000594076	0.680796	0.280419	0.0387846
ADGRE2_ENST00000594294	0.68121	0.279653	0.0391372
ADGRE2_ENST00000595839	0.679065	0.283187	0.0377475
ADGRE2_ENST00000596991	0.682035	0.277673	0.0402913
ADGRE2_ENST00000601345	0.681886	0.277485	0.040629
ADGRE3	0.68503	0.268	0.0469701
ADGRE3_ENST00000344373	0.683116	0.271216	0.0456687
ADGRE3_ENST00000443157	0.682464	0.274995	0.0425418
ADGRE3_ENST00000595472	0.686075	0.261399	0.0525267
ADGRE3_ENST00000599900	0.679362	0.27738	0.0432575
ADGRE5	0.67906	0.281097	0.0398431
ADGRE5_ENST00000357355	0.677594	0.283176	0.03923
ADGRE5_ENST00000358600	0.676324	0.284495	0.0391812
ADGRF1	0.682883	0.269468	0.0476483
ADGRF1_ENST00000283297	0.681752	0.271957	0.0462902
ADGRF1_ENST00000371243	0.687059	0.258258	0.0546827
ADGRF2	0.69616	0.261523	0.0423171
ADGRF2_ENST00000398742	0.691764	0.267518	0.0407175
ADGRF2_ENST00000507065	0.696021	0.262125	0.0418544
ADGRF3	0.665398	0.299484	0.0351178
ADGRF3_ENST00000333478	0.661744	0.305091	0.0331649
ADGRF3_ENST00000421160	0.662861	0.304085	0.0330534
ADGRF4	0.694618	0.261162	0.0442206
ADGRF4_ENST00000327753	0.694618	0.261162	0.0442206
ADGRF4_ENST00000371220	0.693055	0.261029	0.0459158
ADGRF5	0.691398	0.263008	0.045593
ADGRF5_ENST00000265417	0.691398	0.263008	0.045593
ADGRG1	0.675756	0.287695	0.0365491
ADGRG1_ENST00000388813	0.675663	0.287583	0.0367543
ADGRG1_ENST00000456916	0.675843	0.28726	0.0368962
ADGRG1_ENST00000540164	0.675663	0.287583	0.0367543
ADGRG1_ENST00000562558	0.675663	0.287583	0.0367543
ADGRG1_ENST00000562631	0.675663	0.287583	0.0367543
ADGRG1_ENST00000567835	0.675756	0.287695	0.0365491
ADGRG1_ENST00000568908	0.675663	0.287583	0.0367543
ADGRG2	0.694621	0.262939	0.0424399
ADGRG2_ENST00000340581	0.694613	0.261725	0.0436624
ADGRG2_ENST00000354791	0.694613	0.261725	0.0436624
ADGRG2_ENST00000356606	0.694538	0.263145	0.0423164
ADGRG2_ENST00000357544	0.694001	0.263165	0.0428342
ADGRG2_ENST00000357991	0.694519	0.262895	0.0425864
ADGRG2_ENST00000360279	0.693816	0.263796	0.0423874
ADGRG2_ENST00000379873	0.6943	0.263823	0.041877
ADGRG2_ENST00000379876	0.693359	0.26361	0.0430305
ADGRG2_ENST00000379878	0.694087	0.262959	0.042954
ADGRG3	0.670336	0.296012	0.0336512
ADGRG3_ENST00000450388	0.671697	0.296623	0.0316801
ADGRG4	0.718387	0.24171	0.0399032
ADGRG4_ENST00000370652	0.718387	0.24171	0.0399032
ADGRG4_ENST00000394141	0.719849	0.241021	0.0391301
ADGRG5	0.671463	0.290249	0.0382877
ADGRG5_ENST00000349457	0.671463	0.290249	0.0382877
ADGRG5_ENST00000615867	0.679616	0.284448	0.0359361
ADGRG6	0.696248	0.254793	0.0489586
ADGRG6_ENST00000230173	0.696411	0.254215	0.049374
ADGRG6_ENST00000296932	0.69498	0.254774	0.0502456
ADGRG6_ENST00000367608	0.694846	0.255356	0.0497978
ADGRG7	0.696362	0.252967	0.0506706
ADGRG7_ENST00000475887	0.689027	0.259377	0.0515953
ADGRL1	0.668737	0.295817	0.0354459
ADGRL1_ENST00000361434	0.668616	0.29609	0.0352941
ADGRL2	0.698249	0.243701	0.0580498
ADGRL2_ENST00000319517	0.698755	0.243489	0.0577559
ADGRL2_ENST00000359929	0.698755	0.243489	0.0577559
ADGRL2_ENST00000370713	0.694008	0.24627	0.0597217
ADGRL2_ENST00000370715	0.694224	0.244669	0.061107
ADGRL2_ENST00000370717	0.698224	0.24437	0.0574052
ADGRL2_ENST00000370721	0.697954	0.243791	0.0582555
ADGRL2_ENST00000370723	0.69865	0.244067	0.0572824
ADGRL2_ENST00000370725	0.698142	0.244275	0.0575832
ADGRL2_ENST00000370727	0.698164	0.243607	0.0582282
ADGRL2_ENST00000370728	0.698224	0.24437	0.0574052
ADGRL2_ENST00000627151	0.698164	0.243607	0.0582282
ADGRL3	0.699148	0.257499	0.0433538
ADGRL3_ENST00000504896	0.699253	0.254397	0.0463504
ADGRL3_ENST00000506700	0.698788	0.254018	0.0471941
ADGRL3_ENST00000506720	0.69853	0.258482	0.0429884
ADGRL3_ENST00000506746	0.698629	0.258256	0.0431144
ADGRL3_ENST00000507164	0.698108	0.25547	0.0464223
ADGRL3_ENST00000507625	0.698136	0.258319	0.0435444
ADGRL3_ENST00000508693	0.697985	0.255765	0.0462504
ADGRL3_ENST00000508946	0.699647	0.257442	0.0429105
ADGRL3_ENST00000509896	0.697389	0.255753	0.0468582
ADGRL3_ENST00000511324	0.697512	0.255448	0.0470402
ADGRL3_ENST00000512091	0.698644	0.254357	0.0469989
ADGRL3_ENST00000514157	0.699395	0.254071	0.0465341
ADGRL3_ENST00000514996	0.69976	0.257197	0.0430429
ADGRL4	0.709459	0.231562	0.0589784
ADGRV1	0.709548	0.244528	0.0459238
ADGRV1_ENST00000639821	0.67611	0.276022	0.0478688
ADGRV1_ENST00000640815	0.692296	0.261444	0.0462591
ADGRV1_ENST00000645211	0.709548	0.244528	0.0459238
ADH1A	0.702093	0.266552	0.0313553
ADH1B	0.697877	0.27416	0.0279632
ADH1B_ENST00000506651	0.697351	0.275642	0.0270063
ADH1B_ENST00000625860	0.697351	0.275642	0.0270063
ADH1B_ENST00000639454	0.697877	0.27416	0.0279632
ADH1C	0.696834	0.272316	0.0308499
ADH4	0.701028	0.266921	0.0320506
ADH4_ENST00000265512	0.701418	0.267429	0.0311528
ADH4_ENST00000505590	0.701028	0.266921	0.0320506
ADH4_ENST00000629236	0.701721	0.265661	0.0326182
ADH5	0.702735	0.260693	0.0365717
ADH5_ENST00000626055	0.68892	0.274899	0.0361805
ADH6	0.696634	0.266429	0.0369371
ADH6_ENST00000237653	0.697353	0.264197	0.03845
ADH6_ENST00000394897	0.696291	0.264036	0.0396727
ADH7	0.710222	0.256299	0.0334793
ADH7_ENST00000209665	0.70827	0.2576	0.0341301
ADH7_ENST00000437033	0.707975	0.259235	0.0327901
ADH7_ENST00000482593	0.706813	0.262889	0.030298
ADHFE1	0.689829	0.2759	0.0342714
ADHFE1_ENST00000415254	0.69178	0.277325	0.0308944
ADI1	0.677217	0.266576	0.0562068
ADI1_ENST00000382093	0.679806	0.267346	0.0528479
ADIG	0.672039	0.262235	0.0657265
ADIG_ENST00000373348	0.649897	0.294555	0.0555478
ADIPOQ	0.672972	0.283628	0.0434004
ADIPOQ_ENST00000320741	0.672972	0.283628	0.0434004
ADIPOR1	0.679968	0.279366	0.0406656
ADIPOR1_ENST00000367254	0.683483	0.266268	0.050249
ADIPOR2	0.695816	0.258835	0.0453487
ADIRF	0.682007	0.267131	0.0508623
ADK	0.704391	0.24968	0.0459287
ADK_ENST00000372734	0.707968	0.245519	0.0465125
ADK_ENST00000539909	0.701985	0.251035	0.04698
ADK_ENST00000541550	0.710787	0.243424	0.0457888
ADM	0.679641	0.286267	0.0340917
ADM_ENST00000278175	0.679641	0.286267	0.0340917
ADM_ENST00000524948	0.675621	0.287212	0.0371671
ADM_ENST00000525063	0.679641	0.286267	0.0340917
ADM_ENST00000526492	0.686448	0.275002	0.0385495
ADM_ENST00000528544	0.675621	0.287212	0.0371671
ADM_ENST00000530439	0.688596	0.280406	0.0309974
ADM_ENST00000534464	0.689849	0.278694	0.0314575
ADM2	0.678992	0.283292	0.0377158
ADM2_ENST00000395737	0.678992	0.283292	0.0377158
ADM5	0.662155	0.300929	0.0369162
ADNP	0.711204	0.237312	0.0514844
ADNP_ENST00000349014	0.711204	0.237312	0.0514844
ADNP_ENST00000396029	0.711204	0.237312	0.0514844
ADNP_ENST00000396032	0.711204	0.237312	0.0514844
ADNP_ENST00000621696	0.711204	0.237312	0.0514844
ADNP_ENST00000644386	0.710355	0.2447	0.0449456
ADNP_ENST00000645081	0.711064	0.238038	0.0508975
ADNP2	0.696503	0.265675	0.037822
ADO	0.684937	0.283592	0.0314711
ADORA1	0.650974	0.320732	0.0282934
ADORA1_ENST00000309502	0.650974	0.320732	0.0282934
ADORA1_ENST00000337894	0.650974	0.320732	0.0282934
ADORA1_ENST00000367235	0.639778	0.338525	0.0216967
ADORA1_ENST00000618295	0.666934	0.299961	0.0331048
ADORA1_ENST00000640524	0.639778	0.338525	0.0216967
ADORA2A	0.664694	0.301275	0.0340305
ADORA2A_ENST00000337539	0.664694	0.301275	0.0340305
ADORA2A_ENST00000611543	0.664694	0.301275	0.0340305
ADORA2A_ENST00000618076	0.664694	0.301275	0.0340305
ADORA2B	0.675405	0.290314	0.034281
ADORA3	0.651173	0.314964	0.0338627
ADORA3_ENST00000632535	0.649946	0.334281	0.015773
ADPGK	0.693714	0.269231	0.0370551
ADPGK_ENST00000456471	0.704788	0.261711	0.0335013
ADPRH	0.688272	0.259207	0.052521
ADPRH_ENST00000357003	0.688272	0.259207	0.052521
ADPRH_ENST00000465513	0.688272	0.259207	0.052521
ADPRH_ENST00000478927	0.688272	0.259207	0.052521
ADPRHL1	0.678211	0.272394	0.0493947
ADPRHL1_ENST00000356501	0.673311	0.274989	0.0516997
ADPRHL1_ENST00000612156	0.683267	0.269474	0.0472584
ADPRHL2	0.678557	0.284343	0.0371002
ADPRM	0.717802	0.233056	0.0491417
ADPRM_ENST00000609540	0.712378	0.237242	0.0503802
ADRA1A	0.670845	0.292099	0.0370559
ADRA1A_ENST00000276393	0.669416	0.292582	0.0380021
ADRA1A_ENST00000354550	0.669517	0.291589	0.038894
ADRA1A_ENST00000380572	0.662793	0.298712	0.0384953
ADRA1A_ENST00000380573	0.669416	0.292582	0.0380021
ADRA1A_ENST00000380582	0.666904	0.295527	0.0375685
ADRA1A_ENST00000519229	0.66547	0.296695	0.0378346
ADRA1B	0.669827	0.301672	0.0285004
ADRA1D	0.68776	0.28605	0.0261902
ADRA2A	0.673472	0.296748	0.0297799
ADRA2B	0.658836	0.298546	0.0426175
ADRA2C	0.677537	0.291962	0.030501
ADRA2C_ENST00000509482	0.677909	0.290217	0.0318743
ADRB1	0.685253	0.287531	0.0272156
ADRB2	0.680963	0.277235	0.0418021
ADRB3	0.68175	0.290937	0.0273125
ADRM1	0.686157	0.283368	0.0304751
ADRM1_ENST00000253003	0.686157	0.283368	0.0304751
ADRM1_ENST00000620230	0.687796	0.282518	0.0296869
ADSL	0.699787	0.258709	0.0415047
ADSL_ENST00000216194	0.697678	0.259447	0.0428742
ADSL_ENST00000342312	0.698301	0.260009	0.0416907
ADSL_ENST00000636714	0.700168	0.258763	0.041069
ADSS	0.696045	0.239661	0.0642944
ADSSL1	0.676172	0.28675	0.0370777
ADSSL1_ENST00000330877	0.674322	0.288563	0.0371145
ADSSL1_ENST00000555674	0.683264	0.260035	0.0567008
ADSSL1_ENST00000556623	0.681514	0.258204	0.0602819
ADTRP	0.656493	0.298711	0.0447959
ADTRP_ENST00000414691	0.656569	0.298878	0.044553
AEBP1	0.679297	0.278738	0.0419654
AEBP1_ENST00000450684	0.677849	0.2803	0.0418514
AEBP2	0.717668	0.244342	0.03799
AEBP2_ENST00000266508	0.718297	0.244066	0.0376376
AEBP2_ENST00000360995	0.722074	0.227888	0.0500374
AEBP2_ENST00000541908	0.723721	0.227467	0.0488123
AEN	0.690784	0.27042	0.0387956
AES	0.670263	0.285668	0.0440694
AES_ENST00000327141	0.668367	0.280059	0.0515742
AES_ENST00000586839	0.663557	0.289234	0.0472092
AF241726.2	0.691766	0.271502	0.0367317
AFAP1	0.680856	0.279152	0.0399918
AFAP1_ENST00000358461	0.680655	0.279112	0.040233
AFAP1_ENST00000360265	0.680655	0.279112	0.040233
AFAP1_ENST00000382543	0.680856	0.279152	0.0399918
AFAP1L1	0.679135	0.279706	0.0411585
AFAP1L1_ENST00000515000	0.679465	0.279426	0.0411092
AFAP1L2	0.680515	0.277945	0.0415398
AFAP1L2_ENST00000369271	0.680234	0.278021	0.0417449
AFDN	0.698277	0.25406	0.0476632
AFDN_ENST00000344191	0.699751	0.253519	0.0467305
AFDN_ENST00000351017	0.697605	0.255061	0.0473336
AFDN_ENST00000392108	0.699953	0.253179	0.0468683
AFDN_ENST00000392112	0.699059	0.253662	0.0472783
AFDN_ENST00000400822	0.697474	0.255603	0.0469224
AFDN_ENST00000447894	0.697363	0.255426	0.0472107
AFF1	0.703291	0.25336	0.0433486
AFF1_ENST00000307808	0.702542	0.253624	0.0438339
AFF1_ENST00000544085	0.703214	0.251981	0.0448055
AFF2	0.699684	0.257163	0.0431536
AFF2_ENST00000286437	0.699926	0.262875	0.0371991
AFF2_ENST00000342251	0.698721	0.258023	0.0432564
AFF2_ENST00000370457	0.699168	0.25769	0.0431419
AFF2_ENST00000370458	0.698801	0.245079	0.0561209
AFF3	0.695255	0.263305	0.0414402
AFF3_ENST00000317233	0.695406	0.263878	0.0407162
AFF3_ENST00000409236	0.695406	0.263878	0.0407162
AFF4	0.709326	0.240428	0.0502457
AFF4_ENST00000378595	0.715681	0.232829	0.0514901
AFG1L	0.705446	0.245761	0.0487927
AFG3L2	0.689017	0.265158	0.0458254
AFM	0.713705	0.234875	0.05142
AFMID	0.677288	0.274074	0.0486374
AFMID_ENST00000409257	0.677092	0.274063	0.0488446
AFMID_ENST00000586731	0.655383	0.257929	0.0866886
AFMID_ENST00000588800	0.66799	0.271071	0.0609383
AFMID_ENST00000589256	0.677615	0.259723	0.0626621
AFMID_ENST00000591952	0.68691	0.253183	0.0599062
AFP	0.698036	0.239626	0.0623378
AFP_ENST00000226359	0.700848	0.237886	0.0612667
AFTPH	0.731731	0.221048	0.0472202
AFTPH_ENST00000238856	0.731775	0.219523	0.0487018
AFTPH_ENST00000409933	0.731731	0.221048	0.0472202
AFTPH_ENST00000422803	0.720448	0.247307	0.0322446
AGA	0.714076	0.242507	0.043417
AGAP1	0.68113	0.280258	0.0386116
AGAP1_ENST00000336665	0.679485	0.281715	0.0388006
AGAP1_ENST00000409457	0.680446	0.281259	0.038295
AGAP1_ENST00000409538	0.688795	0.277496	0.0337081
AGAP1_ENST00000428334	0.684398	0.277991	0.0376107
AGAP1_ENST00000614409	0.682864	0.279397	0.0377387
AGAP1_ENST00000619456	0.688225	0.275861	0.035915
AGAP2	0.679345	0.289932	0.0307231
AGAP2_ENST00000257897	0.679926	0.283639	0.0364347
AGAP3	0.680939	0.285474	0.0335872
AGAP3_ENST00000335367	0.690881	0.280772	0.0283466
AGAP3_ENST00000463381	0.678208	0.289265	0.0325272
AGAP3_ENST00000473312	0.673698	0.287557	0.0387449
AGAP3_ENST00000479901	0.675214	0.284319	0.040467
AGAP3_ENST00000622464	0.680179	0.285954	0.033867
AGAP4	0.699773	0.259878	0.0403484
AGAP4_ENST00000311652	0.700078	0.259574	0.0403484
AGAP4_ENST00000616763	0.699925	0.259571	0.0405044
AGAP4_ENST00000618171	0.702423	0.256982	0.0405949
AGAP5	0.700835	0.25876	0.0404053
AGAP5_ENST00000443782	0.700133	0.259357	0.0405097
AGAP5_ENST00000581191	0.700578	0.25876	0.0406618
AGAP6	0.701523	0.257498	0.0409789
AGAP6_ENST00000374056	0.70157	0.258051	0.0403786
AGAP6_ENST00000618025	0.695595	0.262052	0.0423534
AGAP9	0.702501	0.255707	0.0417917
AGBL1	0.69356	0.265898	0.0405422
AGBL1_ENST00000441037	0.693263	0.266388	0.0403488
AGBL2	0.689999	0.256069	0.0539317
AGBL2_ENST00000357610	0.690088	0.256073	0.053839
AGBL2_ENST00000528244	0.691003	0.255585	0.0534117
AGBL3	0.706542	0.236827	0.0566315
AGBL3_ENST00000435976	0.709104	0.238936	0.05196
AGBL4	0.677777	0.267809	0.0544141
AGBL4_ENST00000334103	0.668538	0.284571	0.0468909
AGBL4_ENST00000371836	0.692306	0.242732	0.0649615
AGBL4_ENST00000371838	0.683416	0.257051	0.0595322
AGBL5	0.684843	0.277917	0.03724
AGBL5_ENST00000323064	0.684778	0.274055	0.0411669
AGER	0.673738	0.28288	0.0433812
AGER_ENST00000375055	0.679294	0.280147	0.0405588
AGER_ENST00000375065	0.665689	0.291568	0.0427433
AGER_ENST00000375067	0.677384	0.283521	0.0390955
AGER_ENST00000375070	0.669986	0.287109	0.0429045
AGER_ENST00000375076	0.670317	0.286954	0.0427288
AGER_ENST00000438221	0.682862	0.275733	0.0414041
AGER_ENST00000538695	0.666252	0.286945	0.0468033
AGER_ENST00000620802	0.664917	0.285578	0.0495049
AGFG1	0.709384	0.246898	0.0437182
AGFG1_ENST00000310078	0.706804	0.249923	0.0432724
AGFG1_ENST00000373671	0.70486	0.251361	0.0437798
AGFG1_ENST00000409171	0.706987	0.249561	0.043452
AGFG1_ENST00000409315	0.706464	0.249717	0.0438191
AGFG2	0.686439	0.284676	0.0288851
AGGF1	0.718404	0.223951	0.0576448
AGGF1_ENST00000506806	0.68806	0.244154	0.067786
AGK	0.695208	0.255022	0.0497701
AGK_ENST00000473247	0.697954	0.253674	0.048372
AGK_ENST00000492693	0.701362	0.233461	0.0651778
AGK_ENST00000629555	0.699459	0.25635	0.0441912
AGL	0.707042	0.220909	0.0720494
AGL_ENST00000361915	0.707042	0.220909	0.0720494
AGL_ENST00000370161	0.708303	0.220937	0.0707605
AGL_ENST00000370163	0.707042	0.220909	0.0720494
AGL_ENST00000370165	0.707042	0.220909	0.0720494
AGMAT	0.685239	0.291816	0.0229455
AGMO	0.700004	0.241318	0.0586778
AGO1	0.667753	0.289199	0.0430478
AGO1_ENST00000373206	0.671202	0.286273	0.042525
AGO2	0.679277	0.279314	0.0414085
AGO2_ENST00000519980	0.679014	0.278829	0.0421566
AGO3	0.708743	0.242921	0.0483357
AGO3_ENST00000246314	0.712703	0.236783	0.0505144
AGO3_ENST00000324350	0.699038	0.255438	0.045524
AGO3_ENST00000397828	0.699038	0.255438	0.045524
AGO4	0.699917	0.251428	0.0486553
AGPAT1	0.670159	0.295505	0.0343363
AGPAT1_ENST00000336984	0.670159	0.295505	0.0343363
AGPAT1_ENST00000375104	0.670159	0.295505	0.0343363
AGPAT1_ENST00000375107	0.670159	0.295505	0.0343363
AGPAT1_ENST00000395496	0.670159	0.295505	0.0343363
AGPAT1_ENST00000395497	0.670159	0.295505	0.0343363
AGPAT2	0.67949	0.290484	0.0300257
AGPAT2_ENST00000371694	0.685239	0.286576	0.0281853
AGPAT2_ENST00000538402	0.67949	0.290484	0.0300257
AGPAT3	0.662376	0.292423	0.0452007
AGPAT3_ENST00000291572	0.662376	0.292423	0.0452007
AGPAT3_ENST00000327505	0.662376	0.292423	0.0452007
AGPAT3_ENST00000398058	0.662376	0.292423	0.0452007
AGPAT3_ENST00000398061	0.662376	0.292423	0.0452007
AGPAT3_ENST00000546158	0.662376	0.292423	0.0452007
AGPAT4	0.666128	0.288378	0.0454947
AGPAT4_ENST00000366905	0.656596	0.290482	0.0529215
AGPAT4_ENST00000366911	0.650819	0.297812	0.0513691
AGPAT5	0.684986	0.26169	0.0533232
AGPS	0.70776	0.243417	0.0488238
AGPS_ENST00000409888	0.685096	0.275903	0.0390007
AGR2	0.694214	0.261364	0.0444222
AGR2_ENST00000401412	0.709493	0.244833	0.0456741
AGR3	0.700694	0.235642	0.0636637
AGR3_ENST00000402239	0.702649	0.232337	0.065014
AGRN	0.684538	0.284544	0.0309184
AGRN_ENST00000620552	0.685582	0.283341	0.0310769
AGRP	0.671544	0.292721	0.035735
AGT	0.669335	0.300796	0.0298691
AGTPBP1	0.715206	0.235427	0.049367
AGTPBP1_ENST00000357081	0.717979	0.230424	0.0515962
AGTPBP1_ENST00000376083	0.718156	0.229146	0.0526974
AGTPBP1_ENST00000628899	0.71526	0.234404	0.0503361
AGTR1	0.687132	0.271571	0.0412974
AGTR1_ENST00000349243	0.683754	0.27428	0.0419663
AGTR1_ENST00000402260	0.685472	0.273559	0.0409694
AGTR1_ENST00000404754	0.683754	0.27428	0.0419663
AGTR1_ENST00000461609	0.683754	0.27428	0.0419663
AGTR1_ENST00000474935	0.683754	0.27428	0.0419663
AGTR1_ENST00000475347	0.683754	0.27428	0.0419663
AGTR1_ENST00000497524	0.683754	0.27428	0.0419663
AGTR2	0.698081	0.2568	0.0451191
AGTRAP	0.659792	0.305258	0.0349496
AGTRAP_ENST00000376627	0.70169	0.270263	0.0280463
AGTRAP_ENST00000376629	0.658981	0.304984	0.0360349
AGTRAP_ENST00000376637	0.689498	0.277458	0.0330445
AGTRAP_ENST00000400895	0.696299	0.274461	0.02924
AGTRAP_ENST00000452018	0.693987	0.273424	0.0325884
AGTRAP_ENST00000510878	0.678872	0.276313	0.0448154
AGXT	0.671955	0.29494	0.0331051
AGXT2	0.701527	0.255246	0.0432272
AGXT2_ENST00000510428	0.701625	0.252998	0.0453779
AGXT2_ENST00000618015	0.701625	0.252998	0.0453779
AHCTF1	0.701576	0.222149	0.0762757
AHCTF1_ENST00000366508	0.701322	0.222809	0.0758694
AHCY	0.682106	0.286439	0.0314547
AHCY_ENST00000538132	0.683227	0.285854	0.0309186
AHCYL1	0.688572	0.265834	0.045594
AHCYL1_ENST00000359172	0.688948	0.265332	0.0457196
AHCYL1_ENST00000393614	0.688948	0.265332	0.0457196
AHCYL2	0.689662	0.265803	0.0445352
AHCYL2_ENST00000446544	0.689767	0.265955	0.0442779
AHCYL2_ENST00000474594	0.692764	0.256496	0.0507397
AHCYL2_ENST00000490911	0.690289	0.260297	0.0494137
AHDC1	0.673025	0.299732	0.0272434
AHDC1_ENST00000247087	0.673025	0.299732	0.0272434
AHDC1_ENST00000642245	0.673025	0.299732	0.0272434
AHDC1_ENST00000642416	0.673025	0.299732	0.0272434
AHDC1_ENST00000644989	0.673025	0.299732	0.0272434
AHI1	0.720934	0.222979	0.0560869
AHI1_ENST00000265602	0.720934	0.222979	0.0560869
AHI1_ENST00000327035	0.72446	0.219971	0.0555694
AHI1_ENST00000457866	0.720934	0.222979	0.0560869
AHI1_ENST00000488690	0.719537	0.22408	0.0563835
AHI1_ENST00000528103	0.730883	0.227796	0.0413214
AHI1_ENST00000534469	0.730883	0.227796	0.0413214
AHNAK	0.70896	0.264496	0.0265441
AHNAK_ENST00000257247	0.678893	0.280149	0.0409585
AHNAK_ENST00000530124	0.687874	0.276016	0.0361103
AHNAK2	0.703096	0.266881	0.0300233
AHNAK2_ENST00000557457	0.71197	0.247086	0.0409437
AHR	0.70518	0.238871	0.0559492
AHR_ENST00000642825	0.706273	0.237201	0.056526
AHRR	0.690001	0.275647	0.0343511
AHRR_ENST00000505113	0.690129	0.276433	0.0334379
AHRR_ENST00000506456	0.695524	0.270554	0.0339222
AHRR_ENST00000512529	0.693682	0.271768	0.03455
AHRR_ENST00000515206	0.672735	0.298769	0.0284964
AHSA1	0.687289	0.259982	0.052729
AHSA1_ENST00000535854	0.697691	0.251498	0.0508106
AHSA1_ENST00000555517	0.688189	0.251276	0.0605342
AHSG	0.684728	0.274616	0.0406559
AHSG_ENST00000273784	0.684569	0.274894	0.0405369
AHSP	0.678168	0.276906	0.0449262
AICDA	0.674778	0.274454	0.0507678
AICDA_ENST00000537228	0.673533	0.278352	0.0481148
AIDA	0.683254	0.239266	0.0774795
AIDA_ENST00000355727	0.66804	0.243328	0.0886326
AIF1	0.685589	0.274037	0.0403748
AIF1_ENST00000376049	0.695206	0.275253	0.0295415
AIF1L	0.690879	0.268725	0.0403966
AIF1L_ENST00000247291	0.698877	0.265149	0.0359735
AIF1L_ENST00000372297	0.736404	0.236051	0.0275452
AIF1L_ENST00000372298	0.688502	0.267071	0.0444269
AIF1L_ENST00000372300	0.702503	0.258245	0.0392514
AIF1L_ENST00000372301	0.714363	0.257669	0.0279683
AIF1L_ENST00000372302	0.699397	0.264735	0.0358683
AIFM1	0.687854	0.265573	0.0465729
AIFM1_ENST00000319908	0.687829	0.267496	0.0446751
AIFM1_ENST00000346424	0.683639	0.271182	0.0451789
AIFM1_ENST00000460436	0.690728	0.262787	0.0464852
AIFM1_ENST00000535724	0.688633	0.265957	0.0454101
AIFM2	0.67777	0.29203	0.0302001
AIFM2_ENST00000307864	0.67777	0.29203	0.0302001
AIFM2_ENST00000373248	0.67777	0.29203	0.0302001
AIFM3	0.67791	0.290159	0.0319312
AIFM3_ENST00000399163	0.678163	0.289637	0.0322004
AIFM3_ENST00000405089	0.678139	0.289896	0.0319643
AIFM3_ENST00000440238	0.67791	0.290159	0.0319312
AIG1	0.682069	0.269536	0.0483948
AIG1_ENST00000275235	0.680643	0.270652	0.0487053
AIG1_ENST00000367596	0.657992	0.289668	0.0523399
AIG1_ENST00000494282	0.674233	0.279208	0.0465589
AIG1_ENST00000629020	0.671154	0.281695	0.0471504
AIG1_ENST00000646199	0.678653	0.275305	0.0460423
AIM2	0.706956	0.246785	0.046259
AIMP1	0.706038	0.24551	0.0484522
AIMP1_ENST00000358008	0.707038	0.241892	0.0510707
AIMP1_ENST00000442366	0.707038	0.241892	0.0510707
AIMP2	0.689345	0.271346	0.0393097
AIMP2_ENST00000395236	0.689489	0.272653	0.0378578
AIMP2_ENST00000400479	0.68827	0.272685	0.039045
AIP	0.671565	0.284782	0.0436534
AIPL1	0.674507	0.2856	0.039893
AIPL1_ENST00000250087	0.676556	0.284278	0.0391662
AIPL1_ENST00000570466	0.67028	0.288847	0.040873
AIPL1_ENST00000571740	0.670812	0.287899	0.0412891
AIPL1_ENST00000574506	0.67221	0.287202	0.0405881
AIPL1_ENST00000575265	0.673248	0.284943	0.041809
AIPL1_ENST00000576307	0.668071	0.290724	0.0412044
AIPL1_ENST00000576776	0.677412	0.285328	0.0372606
AIRE	0.683774	0.286494	0.029732
AJAP1	0.683888	0.284292	0.03182
AJAP1_ENST00000378190	0.683888	0.284292	0.03182
AJM1	0.68851	0.282469	0.0290211
AJUBA	0.677938	0.284166	0.0378955
AJUBA_ENST00000361265	0.677938	0.284166	0.0378955
AJUBA_ENST00000397388	0.703475	0.254289	0.042236
AK1	0.675845	0.287792	0.0363636
AK1_ENST00000373156	0.668865	0.293665	0.0374698
AK1_ENST00000373176	0.668865	0.293665	0.0374698
AK1_ENST00000644144	0.668865	0.293665	0.0374698
AK2	0.677393	0.290473	0.0321344
AK2_ENST00000373449	0.676005	0.291295	0.0327002
AK2_ENST00000467905	0.67636	0.29058	0.0330598
AK2_ENST00000480134	0.687628	0.272767	0.0396058
AK2_ENST00000487289	0.700799	0.272389	0.0268112
AK2_ENST00000548033	0.669124	0.29554	0.0353352
AK2_ENST00000626911	0.66289	0.300446	0.0366639
AK2_ENST00000629371	0.687628	0.272767	0.0396058
AK3	0.68405	0.27502	0.0409294
AK3_ENST00000359883	0.687648	0.26096	0.0513913
AK3_ENST00000447596	0.68224	0.277154	0.0406061
AK3_ENST00000611749	0.687648	0.26096	0.0513913
AK4	0.680352	0.273683	0.0459646
AK4_ENST00000327299	0.680352	0.273683	0.0459646
AK4_ENST00000545314	0.680352	0.273683	0.0459646
AK4_ENST00000546702	0.685884	0.258946	0.0551695
AK5	0.689268	0.253689	0.0570433
AK5_ENST00000344720	0.690672	0.251705	0.0576223
AK5_ENST00000478255	0.675233	0.28027	0.0444976
AK6	0.706648	0.229848	0.0635042
AK6_ENST00000380818	0.711871	0.221677	0.0664522
AK6_ENST00000502819	0.679251	0.275974	0.0447745
AK6_ENST00000512561	0.715863	0.221502	0.0626356
AK6_ENST00000618980	0.714281	0.229315	0.0564048
AK7	0.694589	0.253589	0.0518221
AK7_ENST00000555570	0.694118	0.260386	0.0454961
AK8	0.673498	0.286506	0.0399958
AK9	0.710385	0.226143	0.0634722
AK9_ENST00000285397	0.711856	0.221494	0.0666506
AK9_ENST00000355283	0.703823	0.232471	0.0637068
AK9_ENST00000368948	0.714446	0.217307	0.0682468
AKAIN1	0.662623	0.267942	0.0694354
AKAIN1_ENST00000434239	0.672264	0.269025	0.0587105
AKAP1	0.685447	0.273338	0.041215
AKAP1_ENST00000314126	0.689958	0.273199	0.0368434
AKAP1_ENST00000337714	0.685447	0.273338	0.041215
AKAP1_ENST00000539273	0.685447	0.273338	0.041215
AKAP1_ENST00000571629	0.685447	0.273338	0.041215
AKAP1_ENST00000572557	0.685447	0.273338	0.041215
AKAP10	0.711782	0.237044	0.0511737
AKAP10_ENST00000395536	0.712278	0.233884	0.0538381
AKAP11	0.723955	0.223371	0.0526744
AKAP12	0.707745	0.237431	0.054824
AKAP12_ENST00000253332	0.707745	0.237431	0.054824
AKAP12_ENST00000354675	0.709391	0.235014	0.0555951
AKAP12_ENST00000359755	0.709847	0.234305	0.0558476
AKAP13	0.705808	0.24928	0.0449128
AKAP13_ENST00000394510	0.700244	0.25237	0.0473862
AKAP13_ENST00000394518	0.706158	0.249145	0.0446973
AKAP13_ENST00000560302	0.71027	0.251715	0.038015
AKAP13_ENST00000560579	0.701223	0.251066	0.0477114
AKAP14	0.702547	0.240554	0.0568992
AKAP14_ENST00000334356	0.71145	0.228986	0.0595636
AKAP14_ENST00000371422	0.707441	0.228829	0.0637305
AKAP14_ENST00000371425	0.71145	0.228986	0.0595636
AKAP17A	0.687331	0.277186	0.0354823
AKAP17A_ENST00000381261	0.677866	0.283914	0.0382196
AKAP2	0.695449	0.260188	0.0443633
AKAP2_ENST00000259318	0.695201	0.259589	0.0452104
AKAP2_ENST00000374525	0.695762	0.259917	0.0443209
AKAP3	0.699155	0.256892	0.0439536
AKAP3_ENST00000545990	0.699155	0.256892	0.0439536
AKAP4	0.703197	0.247015	0.0497885
AKAP4_ENST00000376064	0.701747	0.248244	0.0500092
AKAP5	0.716295	0.21985	0.0638545
AKAP5_ENST00000320636	0.716295	0.21985	0.0638545
AKAP6	0.713951	0.233536	0.0525134
AKAP6_ENST00000557272	0.700901	0.243029	0.0560699
AKAP6_ENST00000557354	0.704067	0.2406	0.0553334
AKAP7	0.702992	0.241475	0.055533
AKAP7_ENST00000263050	0.696764	0.26167	0.0415655
AKAP7_ENST00000342266	0.698982	0.257904	0.0431141
AKAP7_ENST00000474850	0.696545	0.253943	0.0495126
AKAP7_ENST00000537868	0.711047	0.240337	0.0486157
AKAP7_ENST00000541650	0.707383	0.2352	0.0574174
AKAP8	0.696942	0.262483	0.040575
AKAP8L	0.699425	0.256583	0.0439926
AKAP8L_ENST00000595465	0.696477	0.259854	0.0436687
AKAP9	0.712037	0.209762	0.0782007
AKAP9_ENST00000358100	0.718131	0.201778	0.0800911
AKAP9_ENST00000359028	0.712348	0.209533	0.0781194
AKAP9_ENST00000394564	0.722662	0.200086	0.0772519
AKAP9_ENST00000619023	0.722351	0.194213	0.0834356
AKIP1	0.697928	0.261987	0.040085
AKIP1_ENST00000299576	0.688261	0.271889	0.0398504
AKIP1_ENST00000309357	0.697753	0.264316	0.0379309
AKIP1_ENST00000396648	0.688261	0.271889	0.0398504
AKIP1_ENST00000525005	0.700791	0.256039	0.0431693
AKIP1_ENST00000529876	0.690942	0.265627	0.043431
AKIP1_ENST00000534147	0.697928	0.261987	0.040085
AKIP1_ENST00000534506	0.690942	0.265627	0.043431
AKIRIN1	0.693595	0.247215	0.0591893
AKIRIN1_ENST00000372984	0.691664	0.262363	0.0459728
AKIRIN1_ENST00000446189	0.698345	0.251345	0.0503102
AKIRIN2	0.683254	0.261479	0.0552672
AKNA	0.686785	0.273061	0.0401542
AKNA_ENST00000223791	0.682693	0.279893	0.0374146
AKNA_ENST00000312033	0.691518	0.263649	0.0448328
AKNA_ENST00000374075	0.685933	0.27522	0.0388472
AKNA_ENST00000374079	0.674315	0.289158	0.0365264
AKNA_ENST00000374088	0.686785	0.273061	0.0401542
AKNAD1	0.701975	0.227586	0.0704392
AKNAD1_ENST00000369994	0.70296	0.225894	0.0711463
AKNAD1_ENST00000369995	0.702207	0.228358	0.0694348
AKR1A1	0.665665	0.291941	0.0423946
AKR1A1_ENST00000351829	0.665665	0.291941	0.0423946
AKR1A1_ENST00000471651	0.669595	0.285716	0.0446887
AKR1A1_ENST00000621846	0.665665	0.291941	0.0423946
AKR1B1	0.676735	0.283317	0.0399486
AKR1B10	0.684108	0.27646	0.0394318
AKR1B15	0.689586	0.269217	0.0411963
AKR1B15_ENST00000423958	0.689586	0.269217	0.0411963
AKR1C1	0.676328	0.276848	0.0468243
AKR1C1_ENST00000380859	0.686559	0.266314	0.0471266
AKR1C2	0.678753	0.276062	0.0451843
AKR1C2_ENST00000421196	0.675747	0.279253	0.0450008
AKR1C2_ENST00000455190	0.69239	0.2606	0.0470098
AKR1C3	0.687979	0.266811	0.04521
AKR1C3_ENST00000439082	0.686043	0.267785	0.0461716
AKR1C3_ENST00000605149	0.684257	0.265877	0.0498658
AKR1C4	0.688415	0.262993	0.0485921
AKR1C4_ENST00000263126	0.688415	0.262993	0.0485921
AKR1D1	0.682819	0.265686	0.0514951
AKR1D1_ENST00000411726	0.686599	0.258498	0.0549029
AKR1D1_ENST00000432161	0.675382	0.274106	0.0505119
AKR1E2	0.680307	0.279971	0.0397224
AKR1E2_ENST00000334019	0.678592	0.280617	0.0407911
AKR1E2_ENST00000345253	0.683281	0.273608	0.0431111
AKR1E2_ENST00000532248	0.679117	0.28108	0.0398029
AKR7A2	0.681322	0.280307	0.0383702
AKR7A3	0.678724	0.28164	0.039636
AKR7L	0.67937	0.280447	0.0401832
AKT1	0.68226	0.277712	0.040028
AKT1_ENST00000349310	0.68226	0.277712	0.040028
AKT1_ENST00000402615	0.68226	0.277712	0.040028
AKT1_ENST00000407796	0.68226	0.277712	0.040028
AKT1_ENST00000554848	0.68226	0.277712	0.040028
AKT1_ENST00000555528	0.68226	0.277712	0.040028
AKT1S1	0.694324	0.27865	0.0270263
AKT1S1_ENST00000344175	0.691982	0.279284	0.0287343
AKT1S1_ENST00000391831	0.691982	0.279284	0.0287343
AKT1S1_ENST00000391832	0.691982	0.279284	0.0287343
AKT1S1_ENST00000391833	0.691982	0.279284	0.0287343
AKT1S1_ENST00000391834	0.691982	0.279284	0.0287343
AKT2	0.686892	0.277937	0.035171
AKT2_ENST00000311278	0.685514	0.278238	0.036248
AKT2_ENST00000424901	0.685514	0.278238	0.036248
AKT2_ENST00000579047	0.692974	0.272163	0.0348639
AKT3	0.716974	0.220805	0.0622209
AKT3_ENST00000336199	0.716104	0.220713	0.0631829
AKT3_ENST00000366539	0.716974	0.220805	0.0622209
AKT3_ENST00000366540	0.716104	0.220713	0.0631829
AKTIP	0.707956	0.245473	0.0465711
AKTIP_ENST00000394657	0.708479	0.24491	0.0466114
AKTIP_ENST00000570004	0.708479	0.24491	0.0466114
AL021546.1	0.683055	0.283514	0.0334312
AL021997.3	0.707766	0.238211	0.0540227
AL022312.1	0.644932	0.303197	0.0518711
AL022318.4	0.67886	0.265839	0.0553008
AL031777.3	0.655036	0.309925	0.0350381
AL032819.3	0.683877	0.277956	0.0381672
AL034430.1	0.7176	0.21071	0.0716901
AL035078.4	0.705999	0.24373	0.0502712
AL035425.2	0.768341	0.209596	0.0220632
AL035460.1	0.683434	0.287639	0.0289269
AL049557.1	0.683395	0.273152	0.0434532
AL049629.2_ENST00000534312	0.667531	0.279786	0.0526839
AL049634.2_ENST00000564763	0.682638	0.276553	0.0408089
AL096814.1	0.683432	0.269745	0.0468231
AL096814.1_ENST00000623004	0.672289	0.282792	0.0449192
AL096870.1	0.701596	0.267437	0.0309673
AL109810.2	0.691608	0.256782	0.0516108
AL110118.2	0.690034	0.248011	0.0619552
AL117348.2	0.654225	0.31786	0.0279146
AL121758.1	0.67363	0.281882	0.0444882
AL121845.2	0.682131	0.291659	0.0262102
AL121900.2	0.676289	0.269006	0.0547053
AL132671.2	0.69585	0.256602	0.0475481
AL132780.3	0.671272	0.276075	0.0526527
AL136295.1	0.674627	0.281178	0.0441944
AL136295.3	0.670855	0.290495	0.0386497
AL136373.1	0.697433	0.290791	0.0117762
AL136454.1	0.714784	0.25137	0.0338467
AL136454.1_ENST00000443181	0.714784	0.25137	0.0338467
AL138694.1	0.689386	0.254312	0.0563016
AL139011.2	0.701184	0.243207	0.0556085
AL139260.3	0.658043	0.265531	0.0764265
AL139300.1	0.688883	0.256251	0.0548661
AL139353.1	0.673981	0.269908	0.0561117
AL157392.5	0.707581	0.245855	0.0465645
AL159163.1	0.697069	0.242097	0.0608343
AL160272.2	0.700992	0.259669	0.0393383
AL162231.1	0.679839	0.272948	0.0472128
AL162231.1_ENST00000416454	0.690717	0.232985	0.0762977
AL162231.1_ENST00000423809	0.690717	0.232985	0.0762977
AL162231.1_ENST00000544078	0.679839	0.272948	0.0472128
AL162231.3	0.684747	0.269507	0.045746
AL162417.1	0.671138	0.289092	0.0397701
AL163195.3	0.725702	0.219228	0.0550697
AL163636.2	0.662384	0.327344	0.010272
AL353572.3	0.664715	0.286165	0.0491206
AL354761.1	0.675392	0.282563	0.0420452
AL355102.2	0.70839	0.260075	0.0315351
AL355315.1	0.670948	0.28144	0.0476124
AL355916.3	0.694705	0.2604	0.0448947
AL358075.4	0.695343	0.244179	0.0604777
AL358113.1	0.696408	0.260343	0.0432494
AL360181.3	0.682084	0.289616	0.0283004
AL365214.3	0.711056	0.252546	0.0363982
AL391650.1	0.643117	0.324355	0.0325279
AL391650.1_ENST00000433939	0.643117	0.324355	0.0325279
AL449266.1	0.684817	0.251549	0.0636345
AL451007.3	0.6832	0.281442	0.0353581
AL512428.1	0.702009	0.24516	0.0528315
AL590132.1	0.674868	0.282731	0.0424013
AL590132.1_ENST00000638983	0.679867	0.280889	0.0392436
AL592490.1	0.691199	0.270426	0.0383751
AL603832.3	0.682897	0.279481	0.0376221
AL645922.1	0.684174	0.270663	0.0451629
AL645922.1_ENST00000477310	0.685966	0.269541	0.0444932
AL645941.2	0.680336	0.275108	0.0445562
AL662820.1	0.649658	0.311169	0.0391725
AL662884.4	0.70238	0.274129	0.0234909
AL662899.1	0.706902	0.270078	0.0230202
AL662899.2	0.672669	0.269566	0.0577644
AL662899.2_ENST00000375880	0.692315	0.25643	0.0512547
AL669918.1	0.676717	0.282834	0.0404493
AL672043.1	0.682446	0.280954	0.0366004
AL672142.1	0.678012	0.249228	0.0727594
AL691442.1	0.676301	0.28365	0.0400489
AL772284.2	0.702277	0.257188	0.0405354
AL845331.2	0.687692	0.282418	0.0298903
AL929554.1	0.668173	0.317832	0.0139946
ALAD	0.678884	0.287718	0.0333975
ALAS1	0.697527	0.263483	0.03899
ALAS1_ENST00000310271	0.697527	0.263483	0.03899
ALAS1_ENST00000469224	0.697527	0.263483	0.03899
ALAS1_ENST00000484952	0.697527	0.263483	0.03899
ALAS2	0.685857	0.280005	0.0341375
ALAS2_ENST00000335854	0.686702	0.279328	0.0339704
ALAS2_ENST00000396198	0.686644	0.278929	0.0344265
ALB	0.713004	0.238049	0.0489472
ALB_ENST00000401494	0.707452	0.244308	0.0482401
ALB_ENST00000415165	0.708567	0.245707	0.0457258
ALB_ENST00000503124	0.707243	0.243852	0.0489056
ALB_ENST00000509063	0.714386	0.236842	0.0487725
ALB_ENST00000621085	0.714577	0.234376	0.0510472
ALB_ENST00000621628	0.716266	0.233532	0.0502026
ALCAM	0.700716	0.249615	0.0496683
ALCAM_ENST00000472644	0.698317	0.251522	0.0501609
ALCAM_ENST00000486979	0.70269	0.246566	0.0507445
ALDH16A1	0.673333	0.291093	0.0355733
ALDH16A1_ENST00000455361	0.672979	0.290792	0.0362299
ALDH16A1_ENST00000540132	0.674463	0.292982	0.0325552
ALDH18A1	0.693457	0.269586	0.0369565
ALDH18A1_ENST00000371221	0.693223	0.269761	0.0370161
ALDH1A1	0.695267	0.257518	0.047215
ALDH1A1_ENST00000376939	0.694441	0.258722	0.0468368
ALDH1A2	0.689002	0.268308	0.0426897
ALDH1A2_ENST00000347587	0.689218	0.265731	0.0450511
ALDH1A2_ENST00000537372	0.689194	0.266025	0.0447814
ALDH1A2_ENST00000558231	0.689389	0.266045	0.0445658
ALDH1A2_ENST00000559517	0.68851	0.269914	0.0415759
ALDH1A3	0.678519	0.284391	0.0370895
ALDH1A3_ENST00000346623	0.675915	0.284688	0.0393969
ALDH1A3_ENST00000557963	0.675627	0.30531	0.0190625
ALDH1B1	0.674037	0.290612	0.0353518
ALDH1L1	0.680557	0.286395	0.0330476
ALDH1L1_ENST00000393431	0.67766	0.285001	0.0373387
ALDH1L1_ENST00000393434	0.680674	0.285879	0.033447
ALDH1L1_ENST00000452905	0.681832	0.285722	0.0324455
ALDH1L1_ENST00000455064	0.67766	0.285001	0.0373387
ALDH1L1_ENST00000472186	0.680674	0.285879	0.033447
ALDH1L2	0.695252	0.259571	0.0451768
ALDH2	0.678733	0.282939	0.038328
ALDH2_ENST00000416293	0.679872	0.281704	0.0384241
ALDH3A1	0.671467	0.29061	0.0379225
ALDH3A1_ENST00000225740	0.671467	0.29061	0.0379225
ALDH3A1_ENST00000395555	0.667944	0.294305	0.0377506
ALDH3A1_ENST00000444455	0.671467	0.29061	0.0379225
ALDH3A1_ENST00000494157	0.674722	0.290236	0.0350419
ALDH3A2	0.692475	0.264395	0.0431301
ALDH3A2_ENST00000176643	0.693989	0.263036	0.042975
ALDH3A2_ENST00000395575	0.693989	0.263036	0.042975
ALDH3A2_ENST00000571163	0.720955	0.24703	0.0320156
ALDH3A2_ENST00000579855	0.693989	0.263036	0.042975
ALDH3A2_ENST00000581518	0.692475	0.264395	0.0431301
ALDH3A2_ENST00000626500	0.682582	0.273045	0.0443726
ALDH3A2_ENST00000630662	0.720955	0.24703	0.0320156
ALDH3A2_ENST00000631291	0.690967	0.263473	0.0455605
ALDH3B1	0.676163	0.292091	0.0317457
ALDH3B1_ENST00000612297	0.676904	0.291795	0.0313005
ALDH3B1_ENST00000614849	0.676163	0.292091	0.0317457
ALDH3B1_ENST00000615463	0.665991	0.298261	0.0357483
ALDH3B1_ENST00000617288	0.675058	0.293748	0.0311948
ALDH3B2	0.667721	0.295947	0.0363323
ALDH3B2_ENST00000530069	0.667721	0.295947	0.0363323
ALDH4A1	0.666946	0.298596	0.0344578
ALDH4A1_ENST00000290597	0.666946	0.298596	0.0344578
ALDH4A1_ENST00000538309	0.666961	0.297897	0.0351419
ALDH4A1_ENST00000538839	0.666618	0.299657	0.0337254
ALDH5A1	0.684312	0.27787	0.0378179
ALDH5A1_ENST00000357578	0.684115	0.277996	0.0378889
ALDH5A1_ENST00000491546	0.682623	0.281511	0.0358667
ALDH6A1	0.689304	0.270278	0.0404184
ALDH6A1_ENST00000350259	0.690552	0.270454	0.0389948
ALDH6A1_ENST00000555126	0.684613	0.275241	0.0401462
ALDH7A1	0.693167	0.263507	0.043326
ALDH7A1_ENST00000413020	0.681812	0.271407	0.0467813
ALDH7A1_ENST00000553117	0.691363	0.264674	0.0439631
ALDH7A1_ENST00000636743	0.692716	0.265196	0.0420883
ALDH7A1_ENST00000636879	0.694331	0.262274	0.0433947
ALDH7A1_ENST00000636886	0.695178	0.263596	0.0412262
[truncated: 54,432 more rows]
