# Supplementary material for: Use of signals of positive and negative selection to distinguish cancer genes and passenger genes
Source: eLife. 2021 Jan 11;10:e59629. doi: 10.7554/eLife.59629 (PMC7877913; doi:10.7554/eLife.59629)
Supplement: Supplementary file 28. [file elife-59629-supp28.xlsx]

## Sheet: Supplementary file 28
Gene name	fM**	fS**	fN**			fM**	fS**	fN**
A1BG	0.685917	0.286998	0.0270843		average	0.68653	0.275557	0.0379132
A1CF	0.674775	0.285862	0.0393623		standard deviation	0.0123842	0.0156255	0.00936733
A1CF_ENST00000282641	0.674066	0.286233	0.0397006
A1CF_ENST00000373993	0.674857	0.285338	0.0398057
A1CF_ENST00000373995	0.673991	0.286757	0.039252
A1CF_ENST00000373997	0.674066	0.286233	0.0397006
A1CF_ENST00000374001	0.674066	0.286233	0.0397006
A1CF_ENST00000395495	0.673991	0.286757	0.039252
A2M	0.679437	0.281985	0.0385777
A2ML1	0.675931	0.283942	0.0401279
A2ML1_ENST00000539547	0.678315	0.282246	0.0394391
A3GALT2	0.697374	0.267804	0.0348218
A4GALT	0.690173	0.279745	0.030082
A4GALT_ENST00000249005	0.690173	0.279745	0.030082
A4GALT_ENST00000381278	0.690173	0.279745	0.030082
A4GALT_ENST00000642412	0.690173	0.279745	0.030082
A4GNT	0.680974	0.277446	0.04158
AAAS	0.673455	0.288558	0.0379871
AAAS_ENST00000394384	0.672986	0.289075	0.0379393
AAAS_ENST00000550286	0.673447	0.288639	0.0379137
AACS	0.687326	0.279469	0.0332056
AADAC	0.689435	0.269688	0.0408769
AADAC_ENST00000488869	0.684616	0.27485	0.0405346
AADACL2	0.70255	0.255317	0.0421332
AADACL3	0.669698	0.29339	0.0369117
AADACL4	0.673358	0.297054	0.0295879
AADAT	0.688854	0.269304	0.0418424
AADAT_ENST00000337664	0.688853	0.269163	0.0419836
AADAT_ENST00000353187	0.688853	0.269163	0.0419836
AADAT_ENST00000515480	0.688853	0.269163	0.0419836
AAGAB	0.699314	0.255136	0.04555
AAGAB_ENST00000542650	0.703604	0.252168	0.0442278
AAGAB_ENST00000561452	0.703604	0.252168	0.0442278
AAK1	0.67205	0.281796	0.0461543
AAK1_ENST00000406297	0.667817	0.282533	0.0496502
AAK1_ENST00000409068	0.663115	0.28244	0.054445
AAMDC	0.695231	0.258049	0.04672
AAMDC_ENST00000393427	0.694341	0.256729	0.0489296
AAMDC_ENST00000525034	0.692978	0.255371	0.0516509
AAMDC_ENST00000525409	0.695584	0.248082	0.0563338
AAMDC_ENST00000526415	0.694341	0.256729	0.0489296
AAMDC_ENST00000527134	0.689345	0.251666	0.0589889
AAMDC_ENST00000532481	0.701387	0.245455	0.0531578
AAMDC_ENST00000533193	0.692531	0.264455	0.0430139
AAMDC_ENST00000630098	0.695231	0.258049	0.04672
AAMP	0.699828	0.268772	0.0313999
AAMP_ENST00000248450	0.700237	0.268285	0.0314772
AAMP_ENST00000420660	0.698931	0.269215	0.0318535
AANAT	0.694906	0.28003	0.0250633
AANAT_ENST00000392492	0.705177	0.272776	0.0220467
AAR2	0.686697	0.282633	0.0306695
AAR2_ENST00000320849	0.686697	0.282633	0.0306695
AAR2_ENST00000397286	0.685078	0.283305	0.0316176
AARD	0.693774	0.265138	0.0410883
AARS	0.680969	0.287475	0.0315563
AARS2	0.675419	0.289808	0.0347737
AARSD1	0.691595	0.277816	0.0305886
AASDH	0.698419	0.256653	0.0449282
AASDH_ENST00000451613	0.698391	0.258013	0.0435959
AASDH_ENST00000502617	0.700003	0.25721	0.0427874
AASDH_ENST00000513376	0.700504	0.255781	0.0437145
AASDH_ENST00000602986	0.699743	0.256483	0.0437736
AASDHPPT	0.689672	0.261542	0.0487865
AASS	0.693188	0.272147	0.0346644
AASS_ENST00000417368	0.693188	0.272147	0.0346644
AATF	0.695568	0.267408	0.0370234
AATK	0.698031	0.275419	0.0265504
AATK_ENST00000417379	0.697968	0.274893	0.0271384
ABAT	0.680822	0.288734	0.0304438
ABAT_ENST00000268251	0.680822	0.288734	0.0304438
ABAT_ENST00000425191	0.680822	0.288734	0.0304438
ABAT_ENST00000567812	0.68012	0.287522	0.0323577
ABAT_ENST00000569156	0.682204	0.283673	0.0341233
ABCA1	0.68038	0.28365	0.0359706
ABCA1_ENST00000374733	0.687752	0.282963	0.0292852
ABCA1_ENST00000423487	0.681693	0.277173	0.0411338
ABCA10	0.693846	0.26169	0.0444642
ABCA12	0.68476	0.276174	0.0390661
ABCA12_ENST00000389661	0.686845	0.275467	0.0376883
ABCA12_ENST00000412081	0.68911	0.24481	0.0660806
ABCA13	0.687197	0.268497	0.0443064
ABCA2	0.688399	0.283092	0.028509
ABCA2_ENST00000265662	0.688414	0.283075	0.0285103
ABCA2_ENST00000371605	0.688398	0.283079	0.0285226
ABCA2_ENST00000614293	0.688349	0.283138	0.0285127
ABCA3	0.684351	0.286629	0.0290198
ABCA3_ENST00000382381	0.684765	0.286433	0.028802
ABCA3_ENST00000567910	0.670297	0.296432	0.0332713
ABCA4	0.674004	0.290928	0.0350685
ABCA4_ENST00000536513	0.678097	0.290649	0.0312533
ABCA5	0.700881	0.253279	0.0458395
ABCA5_ENST00000588877	0.700881	0.253279	0.0458395
ABCA6	0.68618	0.269424	0.0443958
ABCA6_ENST00000590645	0.702169	0.246079	0.0517526
ABCA7	0.679617	0.293153	0.0272298
ABCA7_ENST00000433129	0.679617	0.293153	0.0272298
ABCA7_ENST00000435683	0.680049	0.292622	0.0273294
ABCA8	0.682964	0.274892	0.0421437
ABCA8_ENST00000269080	0.683417	0.274869	0.0417137
ABCA8_ENST00000430352	0.682766	0.275015	0.0422198
ABCA8_ENST00000615593	0.685383	0.264723	0.0498939
ABCA9	0.682159	0.272516	0.0453257
ABCA9_ENST00000453985	0.68216	0.27256	0.0452793
ABCA9_ENST00000495634	0.700348	0.24304	0.0566115
ABCB1	0.682245	0.280407	0.0373477
ABCB1_ENST00000265724	0.682245	0.280407	0.0373477
ABCB1_ENST00000543898	0.682408	0.28155	0.0360426
ABCB10	0.666282	0.304629	0.0290885
ABCB11	0.68574	0.273627	0.0406337
ABCB4	0.675979	0.284254	0.0397661
ABCB4_ENST00000358400	0.675465	0.284767	0.0397679
ABCB4_ENST00000359206	0.675858	0.284392	0.0397507
ABCB4_ENST00000453593	0.675465	0.284767	0.0397679
ABCB5	0.683707	0.275127	0.0411667
ABCB5_ENST00000258738	0.68333	0.274462	0.0422076
ABCB5_ENST00000406935	0.682349	0.277797	0.0398542
ABCB5_ENST00000443026	0.683549	0.276545	0.0399053
ABCB6	0.67127	0.29244	0.0362896
ABCB6_ENST00000295750	0.671099	0.29374	0.035161
ABCB7	0.685895	0.274935	0.0391702
ABCB7_ENST00000253577	0.685895	0.274935	0.0391702
ABCB7_ENST00000339447	0.686559	0.274057	0.0393843
ABCB7_ENST00000373394	0.686017	0.275049	0.0389337
ABCB7_ENST00000620875	0.68643	0.273938	0.0396323
ABCB7_ENST00000644766	0.682537	0.278861	0.0386023
ABCB8	0.686297	0.286114	0.0275886
ABCB8_ENST00000358849	0.687554	0.28574	0.0267065
ABCB8_ENST00000477092	0.683744	0.286733	0.0295234
ABCB8_ENST00000477719	0.684674	0.285876	0.02945
ABCB8_ENST00000498578	0.685809	0.287274	0.0269169
ABCB8_ENST00000542328	0.685163	0.289141	0.0256965
ABCB9	0.686965	0.284805	0.02823
ABCB9_ENST00000280560	0.686965	0.284805	0.02823
ABCB9_ENST00000344275	0.685712	0.286333	0.0279552
ABCB9_ENST00000346530	0.687312	0.284692	0.0279968
ABCB9_ENST00000392439	0.686965	0.284805	0.02823
ABCB9_ENST00000442028	0.687053	0.284577	0.0283691
ABCB9_ENST00000442833	0.685943	0.286112	0.0279443
ABCB9_ENST00000540285	0.685201	0.286226	0.0285728
ABCC1	0.678108	0.288085	0.0338071
ABCC1_ENST00000399408	0.680853	0.288422	0.0307254
ABCC10	0.661717	0.30574	0.0325433
ABCC10_ENST00000244533	0.660805	0.3064	0.0327946
ABCC11	0.678676	0.288119	0.0332054
ABCC11_ENST00000353782	0.678777	0.287685	0.0335387
ABCC11_ENST00000356608	0.678676	0.288119	0.0332054
ABCC11_ENST00000394748	0.678676	0.288119	0.0332054
ABCC12	0.683999	0.282085	0.0339159
ABCC2	0.674758	0.287228	0.0380135
ABCC2_ENST00000370434	0.663563	0.28229	0.0541468
ABCC3	0.674803	0.293763	0.0314341
ABCC3_ENST00000427699	0.669992	0.295878	0.0341309
ABCC3_ENST00000515707	0.680081	0.281274	0.0386447
ABCC4	0.678185	0.277113	0.0447026
ABCC4_ENST00000376887	0.678185	0.277113	0.0447026
ABCC4_ENST00000536256	0.672861	0.28209	0.0450486
ABCC4_ENST00000629385	0.675266	0.280693	0.044041
ABCC4_ENST00000646439	0.678834	0.2763	0.0448661
ABCC5	0.680253	0.286465	0.0332821
ABCC5_ENST00000265586	0.680688	0.285936	0.0333763
ABCC5_ENST00000382494	0.694692	0.270887	0.0344216
ABCC5_ENST00000392579	0.695625	0.273637	0.030738
ABCC5_ENST00000427120	0.689269	0.277261	0.0334701
ABCC5_ENST00000446941	0.713043	0.261717	0.0252401
ABCC6	0.676886	0.28891	0.0342031
ABCC6_ENST00000575728	0.68741	0.279261	0.0333287
ABCC6_ENST00000622290	0.677085	0.288075	0.0348399
ABCC6_ENST00000640696	0.676381	0.293229	0.0303899
ABCC8	0.675861	0.293966	0.0301732
ABCC8_ENST00000389817	0.675764	0.294042	0.0301934
ABCC8_ENST00000612903	0.707472	0.280297	0.0122307
ABCC8_ENST00000642271	0.675733	0.294053	0.0302137
ABCC8_ENST00000643260	0.675829	0.293977	0.0301934
ABCC8_ENST00000643878	0.675861	0.293966	0.0301732
ABCC8_ENST00000644772	0.675957	0.293807	0.0302356
ABCC8_ENST00000646902	0.676426	0.293468	0.0301054
ABCC8_ENST00000647015	0.675588	0.293862	0.0305497
ABCC9	0.689408	0.271288	0.0393043
ABCC9_ENST00000261201	0.690045	0.271276	0.038679
ABCC9_ENST00000326684	0.70423	0.252698	0.0430727
ABCC9_ENST00000538350	0.701283	0.264289	0.0344279
ABCC9_ENST00000621589	0.70423	0.252698	0.0430727
ABCC9_ENST00000636888	0.70423	0.252698	0.0430727
ABCD1	0.684309	0.28327	0.0324213
ABCD1_ENST00000370129	0.686022	0.285745	0.0282334
ABCD2	0.686229	0.271149	0.0426218
ABCD3	0.679661	0.273566	0.0467727
ABCD3_ENST00000315713	0.670663	0.294856	0.0344813
ABCD4	0.676778	0.28739	0.0358319
ABCD4_ENST00000557588	0.666918	0.290284	0.0427982
ABCE1	0.687878	0.272225	0.0398972
ABCF1	0.670967	0.286013	0.04302
ABCF1_ENST00000376545	0.670227	0.287214	0.0425595
ABCF2	0.678308	0.285831	0.0358612
ABCF3	0.673327	0.293616	0.0330567
ABCF3_ENST00000292808	0.674203	0.292734	0.0330633
ABCG1	0.686437	0.286419	0.0271439
ABCG1_ENST00000343687	0.687048	0.285935	0.027017
ABCG1_ENST00000347800	0.687103	0.286043	0.0268538
ABCG1_ENST00000398437	0.683217	0.286777	0.0300063
ABCG1_ENST00000398449	0.687906	0.28558	0.0265137
ABCG1_ENST00000398457	0.686037	0.285833	0.02813
ABCG2	0.673636	0.289476	0.0368877
ABCG2_ENST00000515655	0.682038	0.281102	0.0368599
ABCG4	0.681384	0.29324	0.0253759
ABCG4_ENST00000615496	0.681384	0.29324	0.0253759
ABCG4_ENST00000622721	0.681384	0.29324	0.0253759
ABCG5	0.677497	0.292952	0.0295514
ABCG5_ENST00000405322	0.677497	0.292952	0.0295514
ABCG8	0.678417	0.290212	0.031371
ABCG8_ENST00000272286	0.678417	0.290212	0.031371
ABHD1	0.662333	0.298825	0.0388418
ABHD1_ENST00000621324	0.658335	0.302544	0.0391202
ABHD10	0.691497	0.267496	0.0410067
ABHD10_ENST00000494817	0.678948	0.283211	0.0378405
ABHD11	0.68527	0.288531	0.0261989
ABHD11_ENST00000395147	0.687171	0.285291	0.0275384
ABHD11_ENST00000437775	0.685003	0.288846	0.026151
ABHD11_ENST00000458339	0.688446	0.284812	0.0267421
ABHD12	0.671149	0.290931	0.0379198
ABHD12_ENST00000339157	0.670874	0.29212	0.0370061
ABHD12B	0.691022	0.277514	0.0314637
ABHD12B_ENST00000353130	0.691962	0.276567	0.0314712
ABHD13	0.691963	0.261061	0.0469768
ABHD14A	0.669996	0.299942	0.030062
ABHD14A_ENST00000458031	0.667539	0.298904	0.0335567
ABHD14A_ENST00000491470	0.693599	0.273008	0.0333927
ABHD14A-ACY1_ENST00000463937	0.687581	0.283651	0.0287676
ABHD14B	0.672696	0.300816	0.026488
ABHD14B_ENST00000315877	0.674537	0.296053	0.0294103
ABHD14B_ENST00000361143	0.672696	0.300816	0.026488
ABHD14B_ENST00000395008	0.672696	0.300816	0.026488
ABHD14B_ENST00000461108	0.670714	0.299478	0.0298073
ABHD14B_ENST00000525795	0.672696	0.300816	0.026488
ABHD15	0.686913	0.284111	0.028976
ABHD16A	0.673776	0.289318	0.0369053
ABHD16A_ENST00000440843	0.672525	0.289724	0.0377505
ABHD16B	0.695608	0.274356	0.0300354
ABHD17A	0.689802	0.281872	0.0283258
ABHD17A_ENST00000292577	0.696554	0.277531	0.0259153
ABHD17A_ENST00000590661	0.680838	0.289647	0.029515
ABHD17B	0.69942	0.257162	0.0434177
ABHD17B_ENST00000333421	0.698978	0.25831	0.0427121
ABHD17C	0.695258	0.274754	0.0299884
ABHD17C_ENST00000558464	0.698655	0.270121	0.0312237
ABHD17C_ENST00000560609	0.695392	0.272081	0.0325263
ABHD18	0.693096	0.256878	0.0500261
ABHD18_ENST00000388795	0.688988	0.259445	0.0515674
ABHD18_ENST00000398965	0.69443	0.258176	0.0473945
ABHD18_ENST00000444616	0.69443	0.258176	0.0473945
ABHD18_ENST00000611882	0.693688	0.255405	0.0509072
ABHD2	0.679793	0.284564	0.035643
ABHD2_ENST00000565973	0.679793	0.284564	0.035643
ABHD3	0.682414	0.27564	0.0419461
ABHD3_ENST00000578270	0.687048	0.265182	0.0477696
ABHD3_ENST00000580981	0.68147	0.273313	0.0452177
ABHD4	0.682891	0.278403	0.0387062
ABHD4_ENST00000216327	0.672064	0.284876	0.0430599
ABHD5	0.675928	0.279877	0.0441949
ABHD5_ENST00000454293	0.672755	0.285187	0.0420576
ABHD5_ENST00000458276	0.671609	0.282916	0.0454751
ABHD6	0.68496	0.276721	0.0383192
ABHD6_ENST00000295962	0.68496	0.276721	0.0383192
ABHD8	0.684171	0.291354	0.0244746
ABI1	0.685388	0.282286	0.0323261
ABI1_ENST00000346832	0.685032	0.281515	0.0334532
ABI1_ENST00000359188	0.687435	0.278552	0.0340133
ABI1_ENST00000376137	0.689091	0.279214	0.0316951
ABI1_ENST00000376138	0.688548	0.277076	0.0343753
ABI1_ENST00000376139	0.68831	0.278499	0.0331909
ABI1_ENST00000376140	0.68719	0.27888	0.0339309
ABI1_ENST00000376160	0.68856	0.278168	0.0332723
ABI1_ENST00000376166	0.690032	0.27629	0.0336777
ABI1_ENST00000376170	0.688809	0.276727	0.0344644
ABI1_ENST00000490841	0.689439	0.27809	0.0324713
ABI1_ENST00000536334	0.690767	0.277205	0.0320284
ABI2	0.685657	0.282262	0.0320804
ABI2_ENST00000261016	0.699986	0.268729	0.0312843
ABI2_ENST00000261017	0.685976	0.277916	0.0361085
ABI2_ENST00000261018	0.685657	0.282262	0.0320804
ABI2_ENST00000422511	0.687405	0.278056	0.0345392
ABI2_ENST00000424558	0.685925	0.28272	0.0313549
ABI2_ENST00000430418	0.687236	0.28174	0.0310232
ABI3	0.675601	0.298809	0.0255892
ABI3_ENST00000419580	0.675023	0.299479	0.0254983
ABI3BP	0.679761	0.279428	0.0408116
ABI3BP_ENST00000471714	0.682524	0.280252	0.0372241
ABI3BP_ENST00000495063	0.681087	0.282858	0.0360549
ABL1	0.681674	0.28818	0.0301459
ABL1_ENST00000318560	0.681936	0.288368	0.0296968
ABL2	0.678082	0.285842	0.0360761
ABL2_ENST00000344730	0.678665	0.283089	0.0382456
ABL2_ENST00000367623	0.677176	0.286523	0.0363014
ABL2_ENST00000392043	0.676182	0.278009	0.0458083
ABL2_ENST00000504405	0.677645	0.2838	0.0385547
ABL2_ENST00000507173	0.67649	0.285423	0.0380878
ABL2_ENST00000511413	0.677499	0.284692	0.0378089
ABL2_ENST00000512653	0.679169	0.284336	0.0364948
ABLIM1	0.688038	0.276515	0.0354474
ABLIM1_ENST00000369252	0.688052	0.275182	0.0367662
ABLIM1_ENST00000369253	0.687764	0.271744	0.0404918
ABLIM1_ENST00000369256	0.687831	0.275221	0.0369476
ABLIM1_ENST00000369266	0.688309	0.271744	0.0399473
ABLIM1_ENST00000392952	0.686284	0.274928	0.0387883
ABLIM1_ENST00000392955	0.688989	0.273703	0.0373081
ABLIM1_ENST00000533213	0.689291	0.273703	0.0370061
ABLIM2	0.6887	0.276808	0.0344918
ABLIM2_ENST00000341937	0.689839	0.27574	0.0344207
ABLIM2_ENST00000361581	0.691204	0.274129	0.0346674
ABLIM2_ENST00000361737	0.689175	0.275403	0.0354217
ABLIM2_ENST00000407564	0.689839	0.274318	0.035843
ABLIM2_ENST00000428004	0.689659	0.274404	0.0359379
ABLIM2_ENST00000505872	0.688547	0.276239	0.0352141
ABLIM2_ENST00000514025	0.686666	0.276079	0.0372546
ABLIM2_ENST00000545242	0.690137	0.276132	0.0337311
ABLIM3	0.681845	0.278199	0.039956
ABLIM3_ENST00000309868	0.681845	0.278199	0.039956
ABLIM3_ENST00000326685	0.681343	0.278207	0.0404503
ABLIM3_ENST00000356541	0.679219	0.284039	0.0367413
ABLIM3_ENST00000504238	0.68291	0.277067	0.040023
ABLIM3_ENST00000508983	0.681371	0.278143	0.0404856
ABLIM3_ENST00000517451	0.677994	0.284106	0.0379001
ABO	0.68486	0.283167	0.031973
ABO_ENST00000611156	0.687899	0.279772	0.0323288
ABR	0.683641	0.284674	0.0316847
ABR_ENST00000291107	0.682201	0.286625	0.0311741
ABR_ENST00000536794	0.682973	0.287707	0.0293204
ABR_ENST00000543210	0.690031	0.282181	0.0277886
ABR_ENST00000544583	0.682364	0.28648	0.0311559
ABR_ENST00000572441	0.701815	0.269489	0.028696
ABR_ENST00000574437	0.6821	0.285921	0.0319793
ABRA	0.69022	0.266618	0.0431619
ABRACL	0.695459	0.272182	0.0323599
ABRACL_ENST00000461027	0.704047	0.261297	0.0346562
ABRAXAS1	0.707982	0.243992	0.0480255
ABRAXAS1_ENST00000506553	0.708795	0.239902	0.0513035
ABRAXAS1_ENST00000515303	0.68423	0.257058	0.058712
ABRAXAS2	0.698323	0.258181	0.0434959
ABT1	0.677122	0.288096	0.0347819
ABTB1	0.688794	0.283234	0.0279722
ABTB1_ENST00000453791	0.691312	0.281185	0.0275038
ABTB1_ENST00000468137	0.691312	0.281185	0.0275038
ABTB2	0.693824	0.277992	0.028184
AC001226.2_ENST00000638101	0.694762	0.237189	0.0680486
AC002094.3	0.663576	0.288187	0.0482369
AC002310.4	0.690357	0.27322	0.0364225
AC002996.1	0.683364	0.288434	0.0282015
AC003002.1	0.682231	0.272772	0.0449969
AC003002.2	0.684162	0.277353	0.0384858
AC003002.3	0.702954	0.257382	0.0396638
AC003006.1	0.695689	0.255848	0.0484634
AC004076.1	0.691599	0.269013	0.039388
AC004080.3	0.688061	0.26961	0.0423289
AC004223.3	0.685711	0.281931	0.0323575
AC004233.2	0.639557	0.3236	0.0368435
AC004593.3	0.689034	0.273432	0.037534
AC004691.2	0.688131	0.28682	0.0250496
AC004754.1	0.69294	0.279223	0.0278373
AC004832.3	0.684326	0.286639	0.0290349
AC004922.1	0.693757	0.272013	0.0342307
AC005154.6	0.697777	0.245528	0.0566949
AC005324.3	0.685425	0.274927	0.0396479
AC005551.1	0.694791	0.275667	0.0295424
AC005697.1	0.668102	0.284032	0.0478667
AC005702.1	0.683006	0.272431	0.0445626
AC005726.1_ENST00000577790	0.656549	0.299013	0.0444379
AC005837.2	0.6604	0.292834	0.0467666
AC006486.1	0.664839	0.299755	0.035406
AC006518.7	0.611206	0.31597	0.0728247
AC006538.2	0.685306	0.300797	0.0138965
AC007040.2	0.669464	0.292223	0.0383133
AC007326.4	0.667059	0.289161	0.0437807
AC007846.2	0.641164	0.325835	0.0330009
AC007906.2	0.692494	0.281547	0.0259587
AC007998.2	0.67532	0.290326	0.0343546
AC008162.2	0.692603	0.241153	0.0662439
AC008397.1	0.707611	0.271248	0.0211408
AC008397.2	0.688875	0.280164	0.0309616
AC008403.1	0.693659	0.276881	0.0294602
AC008687.1	0.702108	0.273061	0.0248311
AC008687.4	0.690174	0.277529	0.0322976
AC008695.1	0.70275	0.256175	0.0410749
AC008758.1	0.724956	0.227824	0.0472198
AC008758.5	0.698607	0.25163	0.0497633
AC008763.3	0.653553	0.313312	0.0331344
AC008770.2	0.710831	0.242929	0.0462401
AC008770.2_ENST00000591944	0.702049	0.254575	0.0433754
AC008878.1	0.666154	0.29265	0.0411965
AC008878.3	0.686389	0.278062	0.0355494
AC008982.1	0.69062	0.278936	0.0304441
AC009086.2	0.679141	0.293005	0.0278539
AC009119.2	0.669063	0.291221	0.0397163
AC009163.4	0.695425	0.263156	0.0414189
AC009477.2	0.711075	0.281358	0.00756723
AC009779.3	0.679369	0.277995	0.0426357
AC009779.3_ENST00000549424	0.664865	0.272366	0.0627691
AC010255.3	0.690546	0.269552	0.039902
AC010255.3_ENST00000514637	0.69624	0.263294	0.0404656
AC010319.2	0.688017	0.288537	0.0234462
AC010325.1	0.674036	0.285748	0.0402165
AC010325.1_ENST00000562076	0.656304	0.312249	0.0314472
AC010422.5	0.692817	0.273288	0.0338953
AC010487.3	0.710948	0.243489	0.0455631
AC010522.1	0.692365	0.266393	0.0412428
AC010531.1	0.691763	0.272291	0.0359459
AC010616.1	0.670724	0.302254	0.0270219
AC010646.1	0.704875	0.280007	0.0151177
AC011005.1	0.692209	0.279323	0.0284679
AC011195.2	0.683742	0.26377	0.0524875
AC011448.1	0.68396	0.286091	0.0299493
AC011455.2	0.681847	0.281207	0.0369455
AC011462.1	0.686788	0.277399	0.0358125
AC011479.1	0.677108	0.299449	0.0234425
AC011499.1	0.673121	0.293993	0.0328868
AC011604.2	0.686194	0.271411	0.0423947
AC011604.2_ENST00000381541	0.691629	0.268418	0.0399526
AC012184.2	0.686239	0.275901	0.0378592
AC012476.1	0.682754	0.277397	0.0398484
AC012531.3	0.696074	0.267371	0.0365546
AC013394.1	0.704261	0.244991	0.0507482
AC013470.2	0.697856	0.246728	0.0554153
AC013470.2_ENST00000635746	0.70058	0.247689	0.0517306
AC015802.6	0.671234	0.300858	0.0279079
AC015813.2	0.694792	0.276381	0.0288267
AC018554.3	0.679062	0.289327	0.0316107
AC018709.1	0.676291	0.289604	0.0341049
AC018755.2	0.675939	0.286665	0.0373954
AC018755.2_ENST00000429354	0.675939	0.286665	0.0373954
AC019117.3	0.686763	0.262875	0.050362
AC020909.1	0.681203	0.28557	0.0332268
AC021072.1	0.679319	0.292378	0.028303
AC021097.2	0.674307	0.294757	0.030936
AC022167.5	0.68432	0.285585	0.0300948
AC022167.5_ENST00000637237	0.68432	0.285585	0.0300948
AC022167.5_ENST00000637929	0.685789	0.284644	0.029567
AC022414.1	0.69646	0.270044	0.0334962
AC022506.1	0.699977	0.223261	0.076762
AC023055.1	0.680814	0.278769	0.0404169
AC023509.3	0.676826	0.291546	0.0316277
AC024592.3	0.671656	0.304784	0.0235602
AC025283.2	0.7168	0.268187	0.0150133
AC025287.4	0.679195	0.260696	0.0601089
AC026316.5	0.67873	0.28475	0.0365198
AC026461.4	0.671489	0.30846	0.0200509
AC026464.3	0.681057	0.286074	0.0328693
AC026464.4	0.685177	0.283438	0.0313853
AC026786.1	0.669471	0.276308	0.0542211
AC034102.2	0.70289	0.26874	0.0283698
AC037459.1_ENST00000430850	0.695936	0.271583	0.0324811
AC058822.1	0.694632	0.269892	0.0354766
AC068533.4	0.69508	0.270093	0.034827
AC068580.4	0.685067	0.284253	0.0306793
AC068580.4_ENST00000636615	0.683073	0.289156	0.0277711
AC068631.2	0.679611	0.277032	0.0433564
AC068775.1	0.689734	0.26097	0.0492959
AC068790.8	0.687276	0.275763	0.036961
AC068987.5	0.698066	0.275259	0.0266751
AC069368.1	0.67367	0.289841	0.0364886
AC073111.3	0.693266	0.272611	0.034123
AC073111.5	0.720644	0.254133	0.0252232
AC073111.5_ENST00000641717	0.694064	0.275472	0.0304646
AC073111.5_ENST00000642087	0.720644	0.254133	0.0252232
AC073610.2	0.666229	0.296433	0.0373383
AC073610.3	0.685051	0.279812	0.0351364
AC073896.1	0.690035	0.272323	0.0376427
AC078864.2	0.725516	0.251727	0.0227565
AC079341.3	0.66982	0.293407	0.0367724
AC079341.3_ENST00000643802	0.669131	0.292458	0.0384108
AC083800.1	0.682338	0.272079	0.0455823
AC087498.1	0.693981	0.287524	0.0184951
AC090517.4	0.707231	0.2481	0.0446687
AC090527.2	0.66494	0.297926	0.037134
AC091057.6	0.69424	0.271348	0.0344124
AC091167.6	0.692783	0.245623	0.0615947
AC091959.3	0.681172	0.273246	0.0455818
AC091980.2	0.672312	0.312036	0.0156521
AC092017.3	0.705595	0.246533	0.0478718
AC092073.1_ENST00000606020	0.690856	0.26627	0.0428737
AC092143.1	0.695663	0.276354	0.0279834
AC092329.3	0.707956	0.24062	0.0514248
AC092442.1	0.693075	0.262461	0.0444646
AC092587.1	0.704802	0.247119	0.0480794
AC092647.5	0.689546	0.264954	0.0455004
AC092718.3	0.675997	0.281485	0.0425187
AC092718.8	0.678717	0.284933	0.0363503
AC092835.1	0.704566	0.243676	0.0517572
AC093155.3	0.695133	0.260254	0.0446135
AC093323.1	0.715193	0.266132	0.0186752
AC093512.2	0.67218	0.296516	0.0313045
AC093512.2_ENST00000338110	0.677779	0.293773	0.0284476
AC093512.2_ENST00000395248	0.678903	0.295367	0.0257304
AC093512.2_ENST00000562240	0.668833	0.306579	0.0245876
AC093512.2_ENST00000566897	0.703028	0.260301	0.0366705
AC093512.2_ENST00000568435	0.703028	0.260301	0.0366705
AC093512.2_ENST00000575627	0.716183	0.244815	0.039002
AC093525.1	0.696707	0.288002	0.015291
AC093525.2	0.688794	0.278611	0.032595
AC093668.1	0.682005	0.287078	0.0309171
AC093668.3	0.677921	0.293739	0.0283404
AC093827.5	0.677978	0.283159	0.0388622
AC093899.2	0.703267	0.252958	0.043776
AC096582.3	0.671218	0.286119	0.0426628
AC097637.1	0.684031	0.287253	0.0287161
AC098582.1	0.671401	0.277555	0.0510441
AC099489.1	0.681951	0.283987	0.0340619
AC099811.2	0.679353	0.288647	0.0320003
AC099850.2	0.682292	0.279008	0.0386998
AC100868.1	0.692947	0.27783	0.0292225
AC104109.3	0.692409	0.265435	0.0421562
AC104389.5	0.679354	0.295237	0.0254088
AC104389.5_ENST00000642908	0.683194	0.289831	0.0269749
AC104452.1_ENST00000636166	0.682578	0.289016	0.0284066
AC104662.2	0.689775	0.25642	0.0538047
AC106774.10	0.693186	0.275167	0.0316467
AC106774.5	0.69971	0.272935	0.0273549
AC106774.6	0.700687	0.271926	0.0273865
AC106774.7	0.700853	0.271792	0.0273549
AC106774.8	0.697259	0.27315	0.0295911
AC106774.9	0.701034	0.271611	0.0273549
AC106782.1	0.670667	0.293966	0.0353673
AC107871.1	0.685187	0.276169	0.0386441
AC107959.5	0.712401	0.263304	0.0242949
AC108488.2	0.710538	0.225833	0.063629
AC114490.3	0.66343	0.29701	0.0395596
AC115220.1	0.709699	0.238986	0.0513145
AC116366.3	0.694744	0.24623	0.0590267
AC116366.3_ENST00000638452	0.694744	0.24623	0.0590267
AC116366.3_ENST00000638568	0.694744	0.24623	0.0590267
AC116565.1	0.718519	0.262274	0.0192069
AC117457.1	0.688143	0.268885	0.0429724
AC118470.1	0.687494	0.285889	0.0266179
AC118549.1	0.695643	0.243033	0.0613234
AC118549.1_ENST00000370798	0.688391	0.250301	0.0613082
AC118553.2	0.677445	0.276105	0.0464498
AC118553.2_ENST00000638792	0.675602	0.277483	0.0469152
AC119396.1	0.686978	0.276688	0.0363337
AC119676.1	0.724271	0.222953	0.052776
AC126283.2	0.696378	0.255905	0.0477177
AC126755.2	0.688188	0.271482	0.04033
AC126755.2_ENST00000327792	0.686093	0.279553	0.0343545
AC126755.2_ENST00000531453	0.685925	0.268491	0.0455841
AC126755.2_ENST00000545114	0.685925	0.268491	0.0455841
AC129492.3	0.670225	0.296502	0.0332731
AC131097.2	0.699473	0.268469	0.0320587
AC131097.2_ENST00000401641	0.698347	0.268908	0.0327447
AC131097.2_ENST00000452112	0.698347	0.268908	0.0327447
AC131160.1	0.679107	0.277212	0.0436807
AC133555.3	0.670025	0.293966	0.036009
AC134669.1	0.703225	0.256801	0.0399741
AC134980.3	0.681232	0.294832	0.0239357
AC135050.2	0.67485	0.281995	0.0431553
AC135068.1	0.674747	0.297606	0.0276469
AC135068.3	0.680649	0.29537	0.0239802
AC135586.2	0.686733	0.270105	0.0431626
AC136428.1	0.669967	0.286156	0.0438772
AC138647.1	0.691214	0.29001	0.0187766
AC138647.1_ENST00000427937	0.690289	0.290798	0.0189133
AC138696.1	0.710495	0.262622	0.0268834
AC138811.2	0.683463	0.273922	0.0426143
AC138969.1	0.688188	0.271482	0.04033
AC138969.1_ENST00000331436	0.686093	0.279553	0.0343545
AC138969.1_ENST00000541593	0.685925	0.268491	0.0455841
AC139530.2	0.67623	0.296641	0.0271295
AC187653.1	0.699842	0.270054	0.0301035
AC233723.1	0.669734	0.301448	0.0288181
AC233724.12	0.703349	0.26452	0.0321315
AC233724.15	0.695627	0.270027	0.0343462
AC233724.16	0.701592	0.269985	0.0284231
AC233724.17	0.700547	0.271796	0.0276574
AC233724.18	0.701091	0.271559	0.0273503
AC233724.19	0.700687	0.271926	0.0273865
AC233724.20	0.701689	0.270892	0.0274186
AC233724.6	0.69283	0.273791	0.0333788
AC243547.3	0.640153	0.321085	0.038762
AC243756.1	0.679293	0.298647	0.0220601
AC243967.1	0.665334	0.286908	0.0477575
AC244197.3	0.676444	0.285237	0.0383185
AC244517.10	0.679017	0.296763	0.0242197
AC244517.6	0.711172	0.211554	0.0772738
AC245033.1	0.677691	0.288864	0.0334442
AC245748.1	0.677126	0.266248	0.0566259
ACAA1	0.679651	0.296693	0.0236562
ACAA1_ENST00000301810	0.682307	0.292694	0.0249984
ACAA1_ENST00000450296	0.677897	0.298316	0.0237877
ACAA1_ENST00000625927	0.70502	0.26864	0.0263404
ACAA1_ENST00000627515	0.713544	0.254224	0.0322328
ACAA2	0.680555	0.283536	0.0359088
ACAA2_ENST00000587994	0.683126	0.281204	0.0356702
ACAA2_ENST00000589432	0.684121	0.278324	0.0375544
ACACA	0.684606	0.278227	0.0371668
ACACA_ENST00000612895	0.685181	0.277774	0.0370456
ACACA_ENST00000614428	0.68428	0.279035	0.0366846
ACACA_ENST00000614438	0.670964	0.287764	0.0412713
ACACA_ENST00000617649	0.684684	0.278436	0.03688
ACACB	0.683468	0.284807	0.0317253
ACACB_ENST00000377848	0.683468	0.284807	0.0317253
ACACB_ENST00000377854	0.680038	0.287972	0.0319905
ACAD10	0.677572	0.286275	0.0361528
ACAD10_ENST00000313698	0.679349	0.285328	0.0353236
ACAD10_ENST00000549590	0.680144	0.280468	0.0393887
ACAD11	0.678305	0.274832	0.0468634
ACAD11_ENST00000481970	0.671428	0.276544	0.0520271
ACAD8	0.682699	0.283781	0.0335199
ACAD8_ENST00000374752	0.675145	0.293804	0.0310506
ACAD9	0.681957	0.290642	0.0274014
ACADL	0.686924	0.267454	0.0456226
ACADM	0.678929	0.268012	0.0530586
ACADM_ENST00000370841	0.681445	0.262406	0.0561493
ACADM_ENST00000420607	0.681893	0.261771	0.0563364
ACADM_ENST00000541113	0.682681	0.262857	0.0544627
ACADS	0.689508	0.281268	0.0292243
ACADS_ENST00000411593	0.690159	0.282147	0.0276938
ACADSB	0.676281	0.275267	0.0484518
ACADSB_ENST00000368869	0.674053	0.280605	0.0453426
ACADVL	0.683952	0.28826	0.0277882
ACADVL_ENST00000350303	0.684366	0.288495	0.027139
ACADVL_ENST00000356839	0.684136	0.289056	0.0268074
ACAN	0.684264	0.287003	0.0287323
ACAN_ENST00000352105	0.683607	0.287832	0.0285607
ACAN_ENST00000558207	0.687508	0.279916	0.0325761
ACAN_ENST00000559004	0.684026	0.287181	0.0287931
ACAN_ENST00000560601	0.684764	0.286498	0.0287385
ACAN_ENST00000561243	0.684264	0.287003	0.0287323
ACAN_ENST00000617301	0.684066	0.28704	0.028894
ACAP1	0.67789	0.290591	0.0315185
ACAP2	0.694418	0.255063	0.0505192
ACAP2_ENST00000618471	0.694447	0.256304	0.0492488
ACAP3	0.69686	0.273296	0.0298438
ACAP3_ENST00000353662	0.693418	0.275967	0.0306151
ACAT1	0.695156	0.274123	0.0307208
ACAT1_ENST00000299355	0.685854	0.278529	0.0356166
ACAT2	0.689823	0.278169	0.0320081
ACBD3	0.668526	0.261028	0.0704454
ACBD4	0.685585	0.271834	0.0425804
ACBD4_ENST00000321854	0.683884	0.273898	0.0422175
ACBD4_ENST00000376955	0.686935	0.271684	0.0413819
ACBD4_ENST00000398322	0.683884	0.273898	0.0422175
ACBD4_ENST00000586346	0.685585	0.271834	0.0425804
ACBD4_ENST00000591859	0.685585	0.271834	0.0425804
ACBD4_ENST00000592162	0.681807	0.282001	0.0361923
ACBD4_ENST00000619916	0.686935	0.271684	0.0413819
ACBD5	0.702085	0.246392	0.0515233
ACBD5_ENST00000375888	0.700986	0.246863	0.0521512
ACBD5_ENST00000375897	0.70199	0.245955	0.0520554
ACBD5_ENST00000375901	0.702954	0.247824	0.0492215
ACBD5_ENST00000375905	0.702485	0.247978	0.0495375
ACBD6	0.676937	0.274654	0.048409
ACBD6_ENST00000367595	0.676937	0.274654	0.048409
ACBD7	0.683098	0.270182	0.0467203
ACCS	0.685081	0.279518	0.0354014
ACCSL	0.681722	0.284236	0.0340416
ACD	0.68199	0.288532	0.0294773
ACD_ENST00000219251	0.682447	0.28826	0.029293
ACD_ENST00000393919	0.68199	0.288532	0.0294773
ACD_ENST00000602320	0.684811	0.283994	0.0311942
ACD_ENST00000620761	0.684041	0.284717	0.0312418
ACE	0.680172	0.279129	0.0406994
ACE_ENST00000290863	0.684607	0.276011	0.0393817
ACE_ENST00000413513	0.685893	0.274786	0.0393213
ACE_ENST00000428043	0.679339	0.279269	0.0413922
ACE2	0.688735	0.261137	0.0501281
ACE2_ENST00000252519	0.688735	0.261137	0.0501281
ACER1	0.687804	0.277554	0.0346414
ACER2	0.665268	0.293994	0.0407383
ACER3	0.677574	0.273568	0.0488583
ACER3_ENST00000526597	0.677268	0.274123	0.0486096
ACER3_ENST00000533873	0.674579	0.273709	0.0517116
ACHE	0.677851	0.291595	0.0305535
ACHE_ENST00000241069	0.678592	0.286961	0.0344467
ACHE_ENST00000411582	0.677851	0.291595	0.0305535
ACHE_ENST00000412389	0.678592	0.286961	0.0344467
ACHE_ENST00000419336	0.674501	0.288686	0.0368121
ACHE_ENST00000428317	0.678592	0.286961	0.0344467
ACIN1	0.685943	0.272246	0.0418118
ACIN1_ENST00000338631	0.684742	0.276382	0.0388759
ACIN1_ENST00000357481	0.684297	0.275469	0.0402337
ACIN1_ENST00000397341	0.684297	0.275469	0.0402337
ACIN1_ENST00000457657	0.685463	0.272251	0.0422854
ACIN1_ENST00000555053	0.686408	0.271717	0.0418757
ACIN1_ENST00000557515	0.684934	0.275118	0.0399473
ACIN1_ENST00000605057	0.685812	0.27208	0.0421073
ACKR1	0.65411	0.318986	0.0269038
ACKR1_ENST00000368122	0.653627	0.319998	0.0263745
ACKR1_ENST00000537147	0.653627	0.319998	0.0263745
ACKR2	0.683749	0.285243	0.0310085
ACKR2_ENST00000442925	0.683749	0.285243	0.0310085
ACKR3	0.681041	0.288587	0.0303719
ACKR4	0.684959	0.274897	0.0401439
ACLY	0.683557	0.287945	0.0284986
ACLY_ENST00000353196	0.683777	0.288047	0.0281757
ACLY_ENST00000393896	0.683777	0.288047	0.0281757
ACLY_ENST00000537919	0.686576	0.284778	0.0286469
ACLY_ENST00000590151	0.683557	0.287945	0.0284986
ACMSD	0.685851	0.27407	0.0400789
ACMSD_ENST00000392928	0.685194	0.278024	0.0367821
ACO1	0.67485	0.291204	0.0339465
ACO1_ENST00000379923	0.67485	0.291204	0.0339465
ACO1_ENST00000541043	0.67485	0.291204	0.0339465
ACO2	0.673324	0.297989	0.0286869
ACO2_ENST00000396512	0.674186	0.296983	0.0288312
ACOD1	0.683676	0.288264	0.0280602
ACOD1_ENST00000449753	0.681519	0.290249	0.0282315
ACOT1	0.676197	0.297425	0.0263784
ACOT1_ENST00000557556	0.676663	0.296114	0.0272227
ACOT11	0.686579	0.279887	0.0335343
ACOT11_ENST00000343744	0.689307	0.278517	0.0321754
ACOT12	0.700986	0.263336	0.0356783
ACOT12_ENST00000513751	0.710055	0.255193	0.0347516
ACOT13	0.700797	0.271409	0.0277942
ACOT13_ENST00000537591	0.70147	0.269721	0.0288091
ACOT2	0.677321	0.294097	0.0285823
ACOT2_ENST00000613168	0.674395	0.296615	0.0289904
ACOT2_ENST00000622407	0.677726	0.29575	0.0265246
ACOT4	0.671034	0.295805	0.0331609
ACOT6	0.689023	0.270149	0.0408278
ACOT6_ENST00000645972	0.685749	0.284417	0.0298334
ACOT7	0.688843	0.285226	0.0259306
ACOT7_ENST00000361521	0.692988	0.282386	0.0246261
ACOT7_ENST00000377842	0.690028	0.283352	0.0266195
ACOT7_ENST00000377845	0.690695	0.282377	0.0269281
ACOT7_ENST00000545482	0.692988	0.282386	0.0246261
ACOT7_ENST00000608083	0.690258	0.283142	0.0266003
ACOT8	0.685591	0.274074	0.0403349
ACOT9	0.700105	0.263881	0.0360146
ACOT9_ENST00000336430	0.698948	0.264961	0.0360908
ACOT9_ENST00000379295	0.704746	0.260001	0.0352522
ACOT9_ENST00000492081	0.711564	0.25259	0.0358459
ACOX1	0.685369	0.279557	0.0350742
ACOX1_ENST00000301608	0.684099	0.279636	0.0362644
ACOX2	0.677066	0.283031	0.0399035
ACOX2_ENST00000459701	0.676311	0.283336	0.0403528
ACOX3	0.674712	0.292206	0.0330817
ACOX3_ENST00000413009	0.67691	0.291113	0.0319767
ACOX3_ENST00000503233	0.674712	0.292206	0.0330817
ACOXL	0.677716	0.287848	0.0344369
ACOXL_ENST00000340561	0.686618	0.281611	0.031771
ACOXL_ENST00000389811	0.684558	0.279354	0.0360881
ACP1	0.70229	0.251591	0.0461195
ACP1_ENST00000272065	0.702614	0.249664	0.0477217
ACP1_ENST00000405233	0.661724	0.28794	0.0503352
ACP1_ENST00000407983	0.679987	0.278665	0.0413488
ACP1_ENST00000439645	0.689403	0.275385	0.035212
ACP2	0.682903	0.277497	0.0395998
ACP2_ENST00000527256	0.685416	0.27735	0.0372342
ACP2_ENST00000529444	0.682288	0.278011	0.0397008
ACP2_ENST00000530453	0.689457	0.271562	0.0389807
ACP2_ENST00000533929	0.681428	0.276873	0.0416989
ACP4	0.66995	0.305308	0.0247424
ACP5	0.674201	0.291164	0.0346344
ACP5_ENST00000218758	0.674201	0.291164	0.0346344
ACP5_ENST00000412435	0.674201	0.291164	0.0346344
ACP5_ENST00000433365	0.674201	0.291164	0.0346344
ACP5_ENST00000590420	0.654787	0.292268	0.0529448
ACP6	0.681614	0.279456	0.0389303
ACP6_ENST00000392988	0.682753	0.282475	0.0347724
ACP6_ENST00000487562	0.675254	0.284821	0.039925
ACP7	0.680304	0.2798	0.0398956
ACP7_ENST00000594229	0.683438	0.278583	0.0379785
ACPP	0.679316	0.278365	0.0423188
ACPP_ENST00000336375	0.683743	0.273121	0.0431355
ACPP_ENST00000475741	0.688246	0.269538	0.0422158
ACR	0.666401	0.294525	0.039074
ACR_ENST00000529621	0.674835	0.288855	0.0363102
ACRBP	0.683923	0.269181	0.0468955
ACRBP_ENST00000414226	0.68529	0.269029	0.0456808
ACRBP_ENST00000536350	0.678803	0.271024	0.0501729
ACRV1	0.691518	0.256548	0.0519337
ACRV1_ENST00000315608	0.693253	0.254796	0.0519509
ACRV1_ENST00000527795	0.683504	0.256178	0.0603184
ACRV1_ENST00000530048	0.686047	0.256715	0.0572375
ACSBG1	0.68248	0.279098	0.0384223
ACSBG1_ENST00000560817	0.687112	0.275149	0.037739
ACSBG2	0.673873	0.288144	0.0379831
ACSBG2_ENST00000588304	0.671462	0.290563	0.0379756
ACSBG2_ENST00000588485	0.680321	0.28277	0.036909
ACSBG2_ENST00000591403	0.673873	0.288144	0.0379831
ACSF2	0.680204	0.28726	0.0325359
ACSF2_ENST00000300441	0.679472	0.287488	0.0330403
ACSF2_ENST00000502667	0.68031	0.286633	0.0330571
ACSF2_ENST00000504392	0.679928	0.287253	0.032819
ACSF3	0.686029	0.28043	0.0335409
ACSF3_ENST00000317447	0.686029	0.28043	0.0335409
ACSF3_ENST00000378345	0.679415	0.28173	0.0388549
ACSF3_ENST00000406948	0.686029	0.28043	0.0335409
ACSL1	0.682843	0.278847	0.0383107
ACSL1_ENST00000281455	0.682843	0.278847	0.0383107
ACSL1_ENST00000454703	0.688479	0.277982	0.0335387
ACSL1_ENST00000504342	0.682843	0.278847	0.0383107
ACSL1_ENST00000504900	0.685328	0.276903	0.0377681
ACSL1_ENST00000507295	0.684643	0.277496	0.0378618
ACSL1_ENST00000513317	0.680829	0.279765	0.0394064
ACSL1_ENST00000622937	0.688479	0.277982	0.0335387
ACSL3	0.684476	0.273189	0.0423349
ACSL3_ENST00000392066	0.684476	0.273189	0.0423349
ACSL4	0.688538	0.274988	0.0364735
ACSL4_ENST00000348502	0.689418	0.27381	0.0367724
ACSL4_ENST00000469796	0.688538	0.274988	0.0364735
ACSL5	0.670541	0.290895	0.0385639
ACSL5_ENST00000354273	0.671016	0.289964	0.0390204
ACSL5_ENST00000354655	0.671016	0.289964	0.0390204
ACSL5_ENST00000393081	0.671016	0.289964	0.0390204
ACSL5_ENST00000433418	0.669442	0.291993	0.0385652
ACSL6	0.677389	0.285173	0.0374378
ACSL6_ENST00000296869	0.677854	0.283665	0.038481
ACSL6_ENST00000357096	0.676572	0.285306	0.0381215
ACSL6_ENST00000379240	0.677233	0.285115	0.0376517
ACSL6_ENST00000379244	0.677718	0.283547	0.0387353
ACSL6_ENST00000379246	0.67766	0.284757	0.037583
ACSL6_ENST00000379255	0.676572	0.285306	0.0381215
ACSL6_ENST00000431707	0.67767	0.284712	0.0376189
ACSL6_ENST00000543479	0.677604	0.284412	0.0379835
ACSM1	0.673653	0.28337	0.0429763
ACSM1_ENST00000520010	0.673653	0.28337	0.0429763
ACSM2A	0.676085	0.281699	0.0422168
ACSM2A_ENST00000219054	0.676085	0.281699	0.0422168
ACSM2A_ENST00000396104	0.676085	0.281699	0.0422168
ACSM2A_ENST00000417235	0.676009	0.285222	0.0387697
ACSM2A_ENST00000575690	0.676085	0.281699	0.0422168
ACSM2B	0.674443	0.283104	0.0424536
ACSM2B_ENST00000414188	0.674443	0.283104	0.0424536
ACSM2B_ENST00000565232	0.674443	0.283104	0.0424536
ACSM2B_ENST00000565322	0.674115	0.286841	0.039044
ACSM2B_ENST00000567001	0.674443	0.283104	0.0424536
ACSM3	0.682279	0.271955	0.0457668
ACSM3_ENST00000440284	0.682794	0.274671	0.0425348
ACSM4	0.684441	0.271029	0.0445304
ACSM5	0.678697	0.284628	0.0366748
ACSM5_ENST00000575070	0.663753	0.302636	0.0336114
ACSM5_ENST00000575584	0.676386	0.288334	0.0352806
ACSM6	0.673478	0.282255	0.0442671
ACSM6_ENST00000394005	0.673478	0.282255	0.0442671
ACSS1	0.682877	0.288115	0.0290085
ACSS1_ENST00000376726	0.677804	0.287393	0.0348035
ACSS1_ENST00000432802	0.683164	0.285439	0.0313965
ACSS1_ENST00000537502	0.684431	0.28661	0.028959
ACSS2	0.682772	0.279528	0.0376993
ACSS2_ENST00000360596	0.683381	0.27917	0.0374493
ACSS3	0.680024	0.280502	0.039474
ACSS3_ENST00000261206	0.680129	0.280971	0.0389001
ACTA1	0.689861	0.283006	0.0271331
ACTA1_ENST00000366683	0.690327	0.282872	0.0268011
ACTA2	0.68551	0.283708	0.0307817
ACTB	0.695306	0.279525	0.0251692
ACTB_ENST00000493945	0.695306	0.279525	0.0251692
ACTB_ENST00000646664	0.695306	0.279525	0.0251692
ACTBL2	0.688884	0.282013	0.0291025
ACTC1	0.688125	0.284332	0.0275428
ACTG1	0.693672	0.277542	0.0287858
ACTG1_ENST00000331925	0.693672	0.277542	0.0287858
ACTG1_ENST00000573283	0.693672	0.277542	0.0287858
ACTG1_ENST00000575087	0.693672	0.277542	0.0287858
ACTG1_ENST00000615544	0.693672	0.277542	0.0287858
ACTG1_ENST00000644774	0.693672	0.277542	0.0287858
ACTG2	0.691515	0.280655	0.0278294
ACTG2_ENST00000345517	0.691515	0.280655	0.0278294
ACTG2_ENST00000409731	0.691395	0.282393	0.0262113
ACTG2_ENST00000409918	0.69754	0.274886	0.0275741
ACTL10	0.69898	0.276637	0.024383
ACTL6A	0.700246	0.256079	0.0436749
ACTL6A_ENST00000392662	0.700314	0.253389	0.0462966
ACTL6A_ENST00000450518	0.700314	0.253389	0.0462966
ACTL6B	0.685222	0.281845	0.0329326
ACTL7A	0.685471	0.279253	0.0352758
ACTL7B	0.696865	0.276762	0.0263732
ACTL8	0.686547	0.278717	0.0347355
ACTL8_ENST00000617065	0.686547	0.278717	0.0347355
ACTL9	0.685363	0.286231	0.0284057
ACTL9_ENST00000612068	0.685363	0.286231	0.0284057
ACTN1	0.685548	0.278202	0.0362502
ACTN1_ENST00000193403	0.684137	0.279066	0.0367966
ACTN1_ENST00000376839	0.683793	0.280766	0.0354411
ACTN1_ENST00000438964	0.685286	0.277985	0.0367293
ACTN1_ENST00000538545	0.684456	0.279149	0.0363953
ACTN2	0.679276	0.276513	0.0442116
ACTN2_ENST00000366578	0.678949	0.277096	0.0439551
ACTN2_ENST00000546208	0.679144	0.274655	0.0462016
ACTN3	0.682027	0.282528	0.0354454
ACTN3_ENST00000513398	0.682563	0.280618	0.0368191
ACTN4	0.692174	0.272767	0.0350594
ACTN4_ENST00000390009	0.695636	0.267531	0.0368334
ACTN4_ENST00000424234	0.697217	0.26764	0.0351435
ACTR10	0.684313	0.277864	0.0378229
ACTR1A	0.674307	0.291959	0.0337344
ACTR1A_ENST00000487599	0.676869	0.289473	0.033658
ACTR1B	0.679534	0.290581	0.0298847
ACTR2	0.683828	0.276791	0.0393816
ACTR2_ENST00000260641	0.683236	0.277173	0.0395909
ACTR2_ENST00000542850	0.68423	0.273297	0.0424732
ACTR3	0.684464	0.270575	0.0449614
ACTR3_ENST00000415792	0.656553	0.314026	0.0294211
ACTR3_ENST00000535589	0.687527	0.266826	0.0456471
ACTR3B	0.682562	0.277808	0.0396304
ACTR3B_ENST00000377776	0.681285	0.276975	0.0417409
ACTR3B_ENST00000397282	0.681879	0.279578	0.0385436
ACTR3C	0.666542	0.28904	0.0444189
ACTR3C_ENST00000539352	0.668683	0.28899	0.0423268
ACTR3C_ENST00000613959	0.660006	0.273799	0.0661941
ACTR5	0.675771	0.28453	0.0396996
ACTR6	0.701615	0.248117	0.0502685
ACTR6_ENST00000546902	0.710488	0.242459	0.0470531
ACTR6_ENST00000551617	0.712355	0.239261	0.0483848
ACTR6_ENST00000552376	0.702535	0.245985	0.0514802
ACTR8	0.681953	0.270858	0.0471885
ACTR8_ENST00000482349	0.687221	0.267372	0.0454076
ACTRT1	0.685742	0.283119	0.0311394
ACTRT2	0.689393	0.281438	0.0291691
ACTRT3	0.681138	0.283215	0.0356473
ACVR1	0.692292	0.266325	0.0413833
ACVR1_ENST00000409283	0.692292	0.266325	0.0413833
ACVR1_ENST00000410057	0.692292	0.266325	0.0413833
ACVR1_ENST00000434821	0.692292	0.266325	0.0413833
ACVR1B	0.68877	0.275379	0.0358518
ACVR1B_ENST00000257963	0.691737	0.273229	0.035034
ACVR1B_ENST00000415850	0.688744	0.278228	0.0330282
ACVR1B_ENST00000426655	0.691464	0.27296	0.0355752
ACVR1B_ENST00000542485	0.689633	0.27347	0.0368972
ACVR1C	0.686359	0.270036	0.0436051
ACVR1C_ENST00000335450	0.687635	0.266677	0.0456885
ACVR1C_ENST00000348328	0.689131	0.265924	0.0449453
ACVR1C_ENST00000409680	0.688218	0.268241	0.0435406
ACVR2A	0.697165	0.259235	0.0436001
ACVR2A_ENST00000404590	0.697165	0.259235	0.0436001
ACVR2A_ENST00000535787	0.692651	0.264635	0.0427144
ACVR2B	0.685522	0.27871	0.0357687
ACVRL1	0.686504	0.281225	0.0322708
ACVRL1_ENST00000419526	0.681483	0.28458	0.0339365
ACVRL1_ENST00000550683	0.686111	0.282445	0.0314439
ACY1	0.690015	0.281114	0.0288712
ACY1_ENST00000404366	0.690015	0.281114	0.0288712
ACY1_ENST00000476351	0.693111	0.278571	0.0283179
ACY1_ENST00000476854	0.691262	0.278913	0.0298247
ACY1_ENST00000494103	0.689459	0.28163	0.028911
ACY1_ENST00000635797	0.69227	0.277642	0.0300885
ACY3	0.686427	0.287877	0.0256964
ACY3_ENST00000529256	0.679949	0.29102	0.0290319
ACYP1	0.658352	0.294452	0.0471957
ACYP1_ENST00000238618	0.658472	0.281108	0.06042
ACYP1_ENST00000357971	0.714888	0.251317	0.0337949
ACYP1_ENST00000553302	0.671292	0.273339	0.0553694
ACYP1_ENST00000555135	0.717439	0.248152	0.034409
ACYP1_ENST00000555694	0.658472	0.281108	0.06042
ACYP2	0.691965	0.258971	0.0490637
ACYP2_ENST00000303536	0.695755	0.267384	0.0368616
ACYP2_ENST00000394666	0.705807	0.25079	0.0434028
ACYP2_ENST00000406041	0.697665	0.269933	0.0324023
ACYP2_ENST00000422521	0.673012	0.276468	0.0505193
ACYP2_ENST00000606082	0.704628	0.264509	0.0308628
ACYP2_ENST00000606865	0.706673	0.248483	0.044844
ADA	0.686048	0.282331	0.0316217
ADA_ENST00000537820	0.683412	0.283971	0.0326176
ADA2	0.689436	0.281385	0.0291791
ADA2_ENST00000262607	0.689436	0.281385	0.0291791
ADA2_ENST00000330232	0.690068	0.277489	0.032443
ADA2_ENST00000399839	0.689436	0.281385	0.0291791
ADA2_ENST00000449907	0.69185	0.278062	0.030088
ADA2_ENST00000610390	0.687235	0.280062	0.0327031
ADAD1	0.689852	0.259658	0.0504897
ADAD1_ENST00000388724	0.69147	0.258888	0.0496421
ADAD1_ENST00000388725	0.689095	0.260942	0.0499636
ADAD2	0.674301	0.295315	0.0303845
ADAD2_ENST00000315906	0.675293	0.296772	0.0279345
ADAL	0.696321	0.26327	0.040409
ADAL_ENST00000389651	0.700145	0.262542	0.0373125
ADAL_ENST00000422466	0.701375	0.258992	0.0396329
ADAL_ENST00000428046	0.701375	0.258992	0.0396329
ADAL_ENST00000610420	0.700145	0.262542	0.0373125
ADAM10	0.701156	0.256479	0.0423652
ADAM10_ENST00000402627	0.690473	0.267425	0.0421021
ADAM10_ENST00000461408	0.678118	0.284751	0.0371312
ADAM10_ENST00000561288	0.686873	0.277357	0.0357702
ADAM11	0.684617	0.284549	0.0308342
ADAM11_ENST00000535346	0.694419	0.276256	0.0293253
ADAM12	0.684991	0.280899	0.0341094
ADAM12_ENST00000368676	0.692316	0.272972	0.034712
ADAM15	0.674148	0.295246	0.0306066
ADAM15_ENST00000271836	0.674824	0.293445	0.0317308
ADAM15_ENST00000355956	0.674931	0.293926	0.0311433
ADAM15_ENST00000359280	0.673996	0.294839	0.0311653
ADAM15_ENST00000360674	0.679676	0.287503	0.032821
ADAM15_ENST00000368412	0.679184	0.288721	0.0320955
ADAM15_ENST00000368413	0.675501	0.290889	0.0336092
ADAM15_ENST00000447332	0.679528	0.288318	0.0321547
ADAM15_ENST00000449910	0.674086	0.295474	0.0304406
ADAM15_ENST00000531455	0.673726	0.294456	0.0318181
ADAM17	0.699723	0.26004	0.0402369
ADAM17_ENST00000497134	0.699721	0.258163	0.0421161
ADAM17_ENST00000618923	0.703056	0.258635	0.0383093
ADAM18	0.703327	0.248158	0.0485152
ADAM18_ENST00000379866	0.701594	0.249705	0.0487011
ADAM18_ENST00000520772	0.694561	0.251878	0.0535614
ADAM19	0.683257	0.282788	0.0339549
ADAM19_ENST00000517905	0.683902	0.281933	0.0341659
ADAM2	0.707805	0.240718	0.0514769
ADAM2_ENST00000347580	0.707875	0.24161	0.0505151
ADAM2_ENST00000379853	0.709787	0.239615	0.0505982
ADAM2_ENST00000521880	0.707544	0.241089	0.0513675
ADAM2_ENST00000622267	0.707544	0.241089	0.0513675
ADAM20	0.695947	0.260782	0.043271
ADAM21	0.696211	0.26182	0.0419691
ADAM22	0.695899	0.262763	0.0413385
ADAM22_ENST00000398201	0.697204	0.261879	0.0409167
ADAM22_ENST00000398204	0.696069	0.262294	0.0416366
ADAM22_ENST00000398209	0.695576	0.262054	0.0423697
ADAM22_ENST00000439864	0.695506	0.267487	0.0370067
ADAM23	0.689659	0.269483	0.0408583
ADAM23_ENST00000374415	0.690604	0.268338	0.0410582
ADAM28	0.70644	0.255315	0.0382448
ADAM28_ENST00000437154	0.709076	0.254294	0.0366302
ADAM29	0.700558	0.257103	0.0423394
ADAM29_ENST00000359240	0.700558	0.257103	0.0423394
ADAM29_ENST00000404450	0.700558	0.257103	0.0423394
ADAM29_ENST00000445694	0.700558	0.257103	0.0423394
ADAM29_ENST00000514159	0.700558	0.257103	0.0423394
ADAM29_ENST00000618444	0.700558	0.257103	0.0423394
ADAM30	0.689823	0.256714	0.0534637
ADAM32	0.696219	0.249258	0.0545231
ADAM32_ENST00000437682	0.696013	0.249701	0.0542868
ADAM32_ENST00000519315	0.694301	0.25136	0.0543388
ADAM33	0.694511	0.273666	0.0318233
ADAM33_ENST00000350009	0.69321	0.275051	0.0317388
ADAM33_ENST00000379861	0.694785	0.27335	0.0318642
ADAM33_ENST00000617732	0.670691	0.292369	0.0369394
ADAM33_ENST00000619289	0.689217	0.277559	0.0332241
ADAM7	0.69251	0.265213	0.0422765
ADAM7_ENST00000380789	0.692163	0.265579	0.0422584
ADAM7_ENST00000441335	0.692098	0.263629	0.0442727
ADAM7_ENST00000520720	0.694027	0.263388	0.0425853
ADAM8	0.692867	0.279924	0.0272085
ADAM8_ENST00000415217	0.702396	0.266881	0.0307226
ADAM8_ENST00000485491	0.688001	0.284126	0.0278725
ADAM9	0.688744	0.271058	0.0401981
ADAM9_ENST00000466936	0.687908	0.260819	0.0512727
ADAM9_ENST00000481513	0.701255	0.256235	0.0425107
ADAMDEC1	0.6897	0.271346	0.0389537
ADAMDEC1_ENST00000522298	0.690909	0.274302	0.0347898
ADAMTS1	0.691155	0.271906	0.0369396
ADAMTS10	0.693613	0.274642	0.0317449
ADAMTS10_ENST00000595838	0.692626	0.277122	0.0302521
ADAMTS10_ENST00000597188	0.693613	0.274642	0.0317449
ADAMTS12	0.691774	0.267414	0.0408121
ADAMTS12_ENST00000352040	0.690405	0.268196	0.0413993
ADAMTS12_ENST00000515401	0.687073	0.273817	0.0391101
ADAMTS13	0.689228	0.277294	0.0334788
ADAMTS13_ENST00000355699	0.690125	0.276298	0.0335769
ADAMTS13_ENST00000356589	0.690514	0.276229	0.0332578
ADAMTS13_ENST00000371910	0.690466	0.270509	0.0390249
ADAMTS13_ENST00000371911	0.687248	0.289243	0.0235096
ADAMTS13_ENST00000371916	0.697903	0.269797	0.0322998
ADAMTS14	0.690125	0.276046	0.0338288
ADAMTS14_ENST00000373207	0.690187	0.276213	0.0336002
ADAMTS15	0.69002	0.280008	0.0299719
ADAMTS16	0.688025	0.271787	0.0401879
ADAMTS16_ENST00000511368	0.687841	0.274739	0.0374195
ADAMTS17	0.692073	0.271048	0.0368785
ADAMTS18	0.675807	0.275932	0.0482611
ADAMTS19	0.690458	0.264773	0.0447688
ADAMTS19_ENST00000274487	0.690625	0.264761	0.0446138
ADAMTS2	0.700268	0.269542	0.0301893
ADAMTS2_ENST00000274609	0.698787	0.2763	0.0249126
ADAMTS20	0.698299	0.248652	0.0530489
ADAMTS20_ENST00000395541	0.697894	0.250538	0.0515687
ADAMTS20_ENST00000553158	0.697635	0.250356	0.0520094
ADAMTS3	0.69446	0.263512	0.0420281
ADAMTS3_ENST00000622135	0.69446	0.263512	0.0420281
ADAMTS4	0.674009	0.295513	0.0304774
ADAMTS4_ENST00000367995	0.659799	0.310247	0.0299537
ADAMTS5	0.682017	0.28278	0.0352033
ADAMTS6	0.693809	0.260969	0.0452224
ADAMTS7	0.692204	0.275339	0.0324571
ADAMTS8	0.691856	0.277583	0.0305613
ADAMTS9	0.693278	0.261005	0.0457165
ADAMTS9_ENST00000295903	0.693167	0.260972	0.0458607
ADAMTS9_ENST00000459780	0.694672	0.269179	0.0361491
ADAMTSL1	0.683277	0.278523	0.0382006
ADAMTSL1_ENST00000276935	0.683111	0.27592	0.040969
ADAMTSL1_ENST00000327883	0.683148	0.273714	0.0431377
ADAMTSL1_ENST00000380545	0.681657	0.276939	0.0414039
ADAMTSL1_ENST00000380566	0.685228	0.273445	0.0413276
ADAMTSL1_ENST00000380570	0.678434	0.281002	0.0405634
ADAMTSL1_ENST00000431052	0.683329	0.274125	0.042546
ADAMTSL2	0.705089	0.260861	0.0340501
ADAMTSL2_ENST00000393060	0.705089	0.260861	0.0340501
ADAMTSL2_ENST00000393061	0.701706	0.264983	0.0333117
ADAMTSL3	0.68946	0.264836	0.0457034
ADAMTSL3_ENST00000567476	0.688816	0.266094	0.0450896
ADAMTSL4	0.680627	0.282917	0.0364566
ADAMTSL4_ENST00000271643	0.681146	0.281718	0.0371362
ADAMTSL4_ENST00000369038	0.681146	0.281718	0.0371362
ADAMTSL4_ENST00000369041	0.677929	0.286819	0.0352518
ADAMTSL5	0.683425	0.282089	0.0344858
ADAMTSL5_ENST00000395467	0.65626	0.308089	0.0356508
ADAP1	0.680249	0.279451	0.0403003
ADAP1_ENST00000265846	0.682696	0.279116	0.0381872
ADAP1_ENST00000449296	0.677816	0.283021	0.0391628
ADAP1_ENST00000611167	0.677816	0.283021	0.0391628
ADAP1_ENST00000617043	0.672934	0.286635	0.0404307
ADAP2	0.6736	0.286519	0.0398814
ADAP2_ENST00000580525	0.6732	0.286956	0.0398442
ADAR	0.678458	0.280725	0.0408177
ADAR_ENST00000368471	0.681369	0.281008	0.0376234
ADARB1	0.681599	0.289217	0.0291846
ADARB1_ENST00000348831	0.683799	0.288865	0.0273363
ADARB1_ENST00000389863	0.682551	0.288837	0.0286125
ADARB1_ENST00000437626	0.681599	0.289217	0.0291846
ADARB1_ENST00000611195	0.728734	0.244383	0.0268834
ADARB1_ENST00000629643	0.683899	0.287945	0.0281557
ADARB2	0.701279	0.274389	0.0243322
ADARB2_ENST00000381305	0.699399	0.268908	0.0316931
ADARB2_ENST00000381310	0.691264	0.280825	0.0279117
ADAT1	0.679815	0.276588	0.0435968
ADAT2	0.698487	0.262109	0.0394037
ADAT2_ENST00000606514	0.689684	0.268028	0.0422876
ADAT3	0.711065	0.26553	0.0234054
ADCK1	0.679932	0.287133	0.0329348
ADCK1_ENST00000341211	0.680442	0.286951	0.0326068
ADCK2	0.680691	0.290854	0.0284549
ADCK2_ENST00000476491	0.678155	0.29151	0.0303351
ADCK5	0.695734	0.276997	0.0272683
ADCY1	0.685269	0.287819	0.0269118
ADCY1_ENST00000432715	0.690465	0.279587	0.0299478
ADCY1_ENST00000621543	0.690465	0.279587	0.0299478
ADCY10	0.679217	0.274966	0.0458161
ADCY10_ENST00000367848	0.678474	0.27503	0.0464961
ADCY10_ENST00000476818	0.724016	0.233115	0.042869
ADCY10_ENST00000545172	0.680373	0.273237	0.0463894
ADCY2	0.681894	0.284511	0.0335946
ADCY3	0.686301	0.284895	0.0288037
ADCY3_ENST00000260600	0.686167	0.285	0.0288333
ADCY4	0.674127	0.295822	0.0300512
ADCY4_ENST00000418030	0.674127	0.295822	0.0300512
ADCY4_ENST00000554068	0.674127	0.295822	0.0300512
ADCY5	0.694869	0.279506	0.0256254
ADCY5_ENST00000309879	0.687878	0.284942	0.0271802
ADCY5_ENST00000491190	0.688385	0.284211	0.0274036
ADCY6	0.68463	0.288332	0.0270381
ADCY6_ENST00000357869	0.683946	0.288693	0.0273614
ADCY6_ENST00000550422	0.683946	0.288693	0.0273614
ADCY7	0.690237	0.282798	0.0269654
ADCY7_ENST00000254235	0.690237	0.282798	0.0269654
ADCY7_ENST00000537579	0.689294	0.282718	0.0279879
ADCY7_ENST00000566433	0.694203	0.281063	0.0247341
ADCY8	0.67766	0.288681	0.033659
ADCY8_ENST00000377928	0.679504	0.286853	0.0336433
ADCY9	0.690823	0.279021	0.0301564
ADCYAP1	0.687765	0.282424	0.0298112
ADCYAP1_ENST00000450565	0.687765	0.282424	0.0298112
ADCYAP1R1	0.684026	0.277993	0.0379816
ADCYAP1R1_ENST00000304166	0.683853	0.279358	0.0367887
ADCYAP1R1_ENST00000396211	0.684026	0.277993	0.0379816
ADCYAP1R1_ENST00000409363	0.682831	0.280871	0.0362983
ADCYAP1R1_ENST00000409489	0.68251	0.278963	0.0385274
ADD1	0.684988	0.282533	0.0324785
ADD1_ENST00000355842	0.683654	0.281255	0.0350906
ADD1_ENST00000398123	0.682023	0.282528	0.0354491
ADD1_ENST00000398125	0.682023	0.282528	0.0354491
ADD1_ENST00000398129	0.684607	0.282819	0.0325746
ADD1_ENST00000446856	0.683876	0.281432	0.0346921
ADD1_ENST00000503455	0.681834	0.282776	0.0353898
ADD1_ENST00000513328	0.681311	0.283044	0.035645
ADD2	0.693991	0.272838	0.0331709
ADD2_ENST00000355733	0.693083	0.270991	0.0359258
ADD2_ENST00000407644	0.693991	0.272838	0.0331709
ADD2_ENST00000413157	0.693601	0.273575	0.0328239
ADD2_ENST00000430656	0.694182	0.273398	0.0324199
ADD3	0.689063	0.266767	0.04417
ADD3_ENST00000277900	0.689789	0.26909	0.0411206
ADD3_ENST00000360162	0.689789	0.26909	0.0411206
ADGB	0.688366	0.26318	0.048454
ADGRA1	0.695012	0.277038	0.0279501
ADGRA1_ENST00000392606	0.69514	0.274703	0.0301574
ADGRA1_ENST00000607359	0.682957	0.286627	0.0304155
ADGRA2	0.68826	0.2857	0.0260405
ADGRA2_ENST00000315215	0.690729	0.283565	0.0257053
ADGRA3	0.685202	0.275783	0.039015
ADGRA3_ENST00000502482	0.683348	0.277995	0.0386574
ADGRA3_ENST00000508133	0.695473	0.264945	0.0395825
ADGRB1	0.696191	0.273309	0.0305005
ADGRB1_ENST00000323289	0.696191	0.273309	0.0305005
ADGRB1_ENST00000643448	0.696291	0.273153	0.0305565
ADGRB2	0.686265	0.28255	0.0311848
ADGRB2_ENST00000373658	0.686227	0.282583	0.0311905
ADGRB2_ENST00000398538	0.685724	0.283373	0.030903
ADGRB2_ENST00000398542	0.68358	0.286033	0.0303871
ADGRB2_ENST00000398547	0.685334	0.28393	0.0307355
ADGRB2_ENST00000398556	0.68522	0.284165	0.0306147
ADGRB2_ENST00000527361	0.685599	0.283196	0.0312051
ADGRB3	0.694698	0.257044	0.0482582
ADGRB3_ENST00000238918	0.695913	0.26255	0.0415376
ADGRB3_ENST00000546190	0.694698	0.257044	0.0482582
ADGRD1	0.682942	0.284956	0.0321017
ADGRD1_ENST00000261654	0.683145	0.284497	0.0323583
ADGRD1_ENST00000335486	0.689231	0.285105	0.0256639
ADGRD1_ENST00000543617	0.686026	0.28466	0.0293144
ADGRD2	0.686192	0.282301	0.0315076
ADGRE1	0.687848	0.277162	0.0349892
ADGRE1_ENST00000250572	0.689355	0.274252	0.0363932
ADGRE1_ENST00000381404	0.686364	0.27883	0.0348064
ADGRE1_ENST00000381407	0.684433	0.280508	0.0350583
ADGRE1_ENST00000450315	0.683445	0.281903	0.0346516
ADGRE2	0.686258	0.279215	0.0345278
ADGRE2_ENST00000392965	0.683914	0.281929	0.0341569
ADGRE2_ENST00000594076	0.684496	0.281683	0.0338207
ADGRE2_ENST00000594294	0.685134	0.280896	0.0339703
ADGRE2_ENST00000595839	0.682783	0.284204	0.0330126
ADGRE2_ENST00000596991	0.686135	0.278885	0.0349799
ADGRE2_ENST00000601345	0.685405	0.279227	0.0353672
ADGRE3	0.68226	0.276883	0.0408578
ADGRE3_ENST00000344373	0.681436	0.278642	0.0399221
ADGRE3_ENST00000443157	0.680863	0.281765	0.037372
ADGRE3_ENST00000595472	0.668947	0.287971	0.0430824
ADGRE3_ENST00000599900	0.680581	0.281196	0.0382237
ADGRE5	0.686895	0.279261	0.033844
ADGRE5_ENST00000357355	0.685509	0.281231	0.03326
ADGRE5_ENST00000358600	0.684567	0.282169	0.0332642
ADGRF1	0.676799	0.282053	0.041148
ADGRF1_ENST00000283297	0.67658	0.283356	0.0400634
ADGRF1_ENST00000371243	0.679259	0.274212	0.0465297
ADGRF2	0.686763	0.275923	0.0373142
ADGRF2_ENST00000398742	0.683821	0.280986	0.0351924
ADGRF2_ENST00000507065	0.687467	0.276194	0.0363388
ADGRF3	0.669189	0.298851	0.0319596
ADGRF3_ENST00000333478	0.665937	0.304257	0.0298062
ADGRF3_ENST00000421160	0.666971	0.303044	0.029985
ADGRF4	0.68811	0.27409	0.0378004
ADGRF4_ENST00000327753	0.68811	0.27409	0.0378004
ADGRF4_ENST00000371220	0.685572	0.275186	0.0392424
ADGRF5	0.686784	0.275057	0.038159
ADGRF5_ENST00000265417	0.686784	0.275057	0.038159
ADGRG1	0.686514	0.281401	0.0320847
ADGRG1_ENST00000388813	0.68628	0.281428	0.0322919
ADGRG1_ENST00000456916	0.686477	0.281174	0.0323496
ADGRG1_ENST00000540164	0.68628	0.281428	0.0322919
ADGRG1_ENST00000562558	0.68628	0.281428	0.0322919
ADGRG1_ENST00000562631	0.68628	0.281428	0.0322919
ADGRG1_ENST00000567835	0.686514	0.281401	0.0320847
ADGRG1_ENST00000568908	0.68628	0.281428	0.0322919
ADGRG2	0.685481	0.2783	0.0362196
ADGRG2_ENST00000340581	0.685598	0.276933	0.0374695
ADGRG2_ENST00000354791	0.685598	0.276933	0.0374695
ADGRG2_ENST00000356606	0.685343	0.278468	0.0361883
ADGRG2_ENST00000357544	0.685044	0.278332	0.0366241
ADGRG2_ENST00000357991	0.685562	0.278093	0.0363444
ADGRG2_ENST00000360279	0.684601	0.279092	0.0363076
ADGRG2_ENST00000379873	0.685239	0.279064	0.0356975
ADGRG2_ENST00000379876	0.684436	0.278789	0.0367748
ADGRG2_ENST00000379878	0.685182	0.278167	0.0366513
ADGRG3	0.676938	0.294278	0.0287835
ADGRG3_ENST00000450388	0.678466	0.29416	0.0273742
ADGRG4	0.703204	0.264047	0.0327495
ADGRG4_ENST00000370652	0.703204	0.264047	0.0327495
ADGRG4_ENST00000394141	0.704202	0.263778	0.0320206
ADGRG5	0.679894	0.287079	0.0330267
ADGRG5_ENST00000349457	0.679894	0.287079	0.0330267
ADGRG5_ENST00000615867	0.682021	0.286784	0.0311945
ADGRG6	0.684656	0.273668	0.0416758
ADGRG6_ENST00000230173	0.684711	0.273216	0.0420735
ADGRG6_ENST00000296932	0.683677	0.273574	0.0427489
ADGRG6_ENST00000367608	0.683643	0.274033	0.0423241
ADGRG7	0.685483	0.27116	0.0433576
ADGRG7_ENST00000475887	0.680942	0.274568	0.0444897
ADGRL1	0.68143	0.289329	0.0292413
ADGRL1_ENST00000361434	0.681328	0.289576	0.0290965
ADGRL2	0.68643	0.266448	0.0471228
ADGRL2_ENST00000319517	0.686931	0.266252	0.0468175
ADGRL2_ENST00000359929	0.686931	0.266252	0.0468175
ADGRL2_ENST00000370713	0.681966	0.269533	0.0485018
ADGRL2_ENST00000370715	0.68217	0.268081	0.049749
ADGRL2_ENST00000370717	0.685945	0.267519	0.0465356
ADGRL2_ENST00000370721	0.685902	0.266819	0.0472795
ADGRL2_ENST00000370723	0.686374	0.26731	0.0463167
ADGRL2_ENST00000370725	0.685883	0.267493	0.0466237
ADGRL2_ENST00000370727	0.686361	0.26643	0.0472087
ADGRL2_ENST00000370728	0.685945	0.267519	0.0465356
ADGRL2_ENST00000627151	0.686361	0.26643	0.0472087
ADGRL3	0.68686	0.276724	0.0364164
ADGRL3_ENST00000504896	0.685572	0.275096	0.0393315
ADGRL3_ENST00000506700	0.685255	0.274679	0.0400665
ADGRL3_ENST00000506720	0.684843	0.27889	0.036267
ADGRL3_ENST00000506746	0.684869	0.278753	0.0363778
ADGRL3_ENST00000507164	0.683032	0.2774	0.0395681
ADGRL3_ENST00000507625	0.684566	0.278687	0.0367469
ADGRL3_ENST00000508693	0.683003	0.277582	0.0394149
ADGRL3_ENST00000508946	0.687127	0.276832	0.0360406
ADGRL3_ENST00000509896	0.682591	0.277461	0.0399478
ADGRL3_ENST00000511324	0.682619	0.277271	0.0401099
ADGRL3_ENST00000512091	0.685201	0.274905	0.039894
ADGRL3_ENST00000514157	0.685626	0.27488	0.039494
ADGRL3_ENST00000514996	0.687171	0.276673	0.0361562
ADGRL4	0.697896	0.255706	0.0463981
ADGRV1	0.693566	0.268635	0.0377993
ADGRV1_ENST00000639821	0.669953	0.287907	0.0421393
ADGRV1_ENST00000640815	0.682323	0.276919	0.0407573
ADGRV1_ENST00000645211	0.693566	0.268635	0.0377993
ADH1A	0.689728	0.284959	0.0253136
ADH1B	0.687998	0.2895	0.022502
ADH1B_ENST00000506651	0.688469	0.28989	0.0216407
ADH1B_ENST00000625860	0.688469	0.28989	0.0216407
ADH1B_ENST00000639454	0.687998	0.2895	0.022502
ADH1C	0.686178	0.289386	0.0244355
ADH4	0.683783	0.289599	0.0266181
ADH4_ENST00000265512	0.684491	0.289888	0.0256208
ADH4_ENST00000505590	0.683783	0.289599	0.0266181
ADH4_ENST00000629236	0.684796	0.288122	0.0270814
ADH5	0.68606	0.284511	0.0294294
ADH5_ENST00000626055	0.681994	0.289035	0.0289707
ADH6	0.681777	0.287599	0.0306244
ADH6_ENST00000237653	0.682242	0.285726	0.0320322
ADH6_ENST00000394897	0.682062	0.284859	0.0330787
ADH7	0.699029	0.274334	0.0266369
ADH7_ENST00000209665	0.696293	0.276213	0.0274937
ADH7_ENST00000437033	0.695743	0.278116	0.0261419
ADH7_ENST00000482593	0.695436	0.280789	0.0237742
ADHFE1	0.678784	0.293305	0.0279112
ADHFE1_ENST00000415254	0.681168	0.294114	0.0247185
ADI1	0.686604	0.267025	0.046371
ADI1_ENST00000382093	0.688398	0.270283	0.0413192
ADIG	0.668454	0.272291	0.0592547
ADIG_ENST00000373348	0.63959	0.310339	0.0500707
ADIPOQ	0.665796	0.298278	0.0359263
ADIPOQ_ENST00000320741	0.665796	0.298278	0.0359263
ADIPOR1	0.678866	0.286663	0.0344708
ADIPOR1_ENST00000367254	0.680164	0.280426	0.0394106
ADIPOR2	0.685533	0.275816	0.038651
ADIRF	0.683551	0.269516	0.0469323
ADK	0.688899	0.27246	0.0386419
ADK_ENST00000372734	0.692313	0.268752	0.0389347
ADK_ENST00000539909	0.686821	0.273029	0.0401498
ADK_ENST00000541550	0.694827	0.26692	0.0382532
ADM	0.68065	0.289201	0.0301492
ADM_ENST00000278175	0.68065	0.289201	0.0301492
ADM_ENST00000524948	0.676558	0.290747	0.0326953
ADM_ENST00000525063	0.68065	0.289201	0.0301492
ADM_ENST00000526492	0.678598	0.28734	0.0340624
ADM_ENST00000528544	0.676558	0.290747	0.0326953
ADM_ENST00000530439	0.687531	0.284558	0.0279108
ADM_ENST00000534464	0.690872	0.281282	0.0278462
ADM2	0.681447	0.282985	0.035568
ADM2_ENST00000395737	0.681447	0.282985	0.035568
ADM5	0.65883	0.30812	0.0330507
ADNP	0.695596	0.260976	0.0434278
ADNP_ENST00000349014	0.695596	0.260976	0.0434278
ADNP_ENST00000396029	0.695596	0.260976	0.0434278
ADNP_ENST00000396032	0.695596	0.260976	0.0434278
ADNP_ENST00000621696	0.695596	0.260976	0.0434278
ADNP_ENST00000644386	0.691444	0.269357	0.0391986
ADNP_ENST00000645081	0.694898	0.261809	0.0432927
ADNP2	0.684415	0.283243	0.0323418
ADO	0.697636	0.275657	0.0267078
ADORA1	0.672411	0.30302	0.0245682
ADORA1_ENST00000309502	0.672411	0.30302	0.0245682
ADORA1_ENST00000337894	0.672411	0.30302	0.0245682
ADORA1_ENST00000367235	0.663409	0.316972	0.0196189
ADORA1_ENST00000618295	0.6836	0.287928	0.028472
ADORA1_ENST00000640524	0.663409	0.316972	0.0196189
ADORA2A	0.674268	0.296665	0.0290667
ADORA2A_ENST00000337539	0.674268	0.296665	0.0290667
ADORA2A_ENST00000611543	0.674268	0.296665	0.0290667
ADORA2A_ENST00000618076	0.674268	0.296665	0.0290667
ADORA2B	0.680792	0.290047	0.0291603
ADORA3	0.661503	0.310431	0.0280659
ADORA3_ENST00000632535	0.662359	0.324754	0.012887
ADPGK	0.687039	0.281681	0.0312802
ADPGK_ENST00000456471	0.697512	0.274231	0.0282568
ADPRH	0.679348	0.275997	0.0446552
ADPRH_ENST00000357003	0.679348	0.275997	0.0446552
ADPRH_ENST00000465513	0.679348	0.275997	0.0446552
ADPRH_ENST00000478927	0.679348	0.275997	0.0446552
ADPRHL1	0.683009	0.276518	0.0404735
ADPRHL1_ENST00000356501	0.677926	0.27982	0.0422544
ADPRHL1_ENST00000612156	0.679245	0.279617	0.0411375
ADPRHL2	0.682239	0.287221	0.0305393
ADPRM	0.701801	0.256589	0.0416103
ADPRM_ENST00000609540	0.69791	0.258534	0.0435559
ADRA1A	0.682459	0.2865	0.0310403
ADRA1A_ENST00000276393	0.681694	0.286435	0.0318705
ADRA1A_ENST00000354550	0.681302	0.286123	0.0325752
ADRA1A_ENST00000380572	0.677148	0.291256	0.0315964
ADRA1A_ENST00000380573	0.681694	0.286435	0.0318705
ADRA1A_ENST00000380582	0.679826	0.288705	0.0314689
ADRA1A_ENST00000519229	0.678393	0.289918	0.0316896
ADRA1B	0.683331	0.292964	0.0237044
ADRA1D	0.702946	0.275421	0.0216327
ADRA2A	0.693367	0.281467	0.025166
ADRA2B	0.669886	0.29404	0.0360748
ADRA2C	0.698079	0.276587	0.0253348
ADRA2C_ENST00000509482	0.695994	0.277551	0.0264548
ADRB1	0.707213	0.270308	0.022479
ADRB2	0.687696	0.276474	0.0358293
ADRB3	0.691787	0.284689	0.0235239
ADRM1	0.689609	0.284441	0.0259505
ADRM1_ENST00000253003	0.689609	0.284441	0.0259505
ADRM1_ENST00000620230	0.690697	0.284249	0.0250544
ADSL	0.689294	0.275068	0.0356373
ADSL_ENST00000216194	0.688745	0.27465	0.0366046
ADSL_ENST00000342312	0.688341	0.27608	0.0355792
ADSL_ENST00000636714	0.689794	0.274889	0.035317
ADSS	0.678425	0.269371	0.0522032
ADSSL1	0.679337	0.289058	0.0316049
ADSSL1_ENST00000330877	0.682104	0.286048	0.0318476
ADSSL1_ENST00000555674	0.685914	0.265303	0.0487837
ADSSL1_ENST00000556623	0.684225	0.263278	0.0524966
ADTRP	0.655167	0.306394	0.0384388
ADTRP_ENST00000414691	0.65546	0.306318	0.0382225
AEBP1	0.686392	0.278802	0.0348059
AEBP1_ENST00000450684	0.684131	0.280979	0.0348907
AEBP2	0.709253	0.259424	0.0313235
AEBP2_ENST00000266508	0.710006	0.259113	0.0308811
AEBP2_ENST00000360995	0.701902	0.254336	0.0437617
AEBP2_ENST00000541908	0.70201	0.254911	0.0430789
AEN	0.693139	0.273418	0.0334424
AES	0.673782	0.287353	0.0388647
AES_ENST00000327141	0.676105	0.278471	0.0454237
AES_ENST00000586839	0.672678	0.285381	0.0419409
AF241726.2	0.690272	0.280341	0.0293864
AFAP1	0.681284	0.285336	0.0333793
AFAP1_ENST00000358461	0.681777	0.28448	0.0337422
AFAP1_ENST00000360265	0.681777	0.28448	0.0337422
AFAP1_ENST00000382543	0.681284	0.285336	0.0333793
AFAP1L1	0.683015	0.282463	0.0345228
AFAP1L1_ENST00000515000	0.684245	0.281462	0.0342935
AFAP1L2	0.684926	0.280791	0.0342824
AFAP1L2_ENST00000369271	0.684588	0.280962	0.0344499
AFDN	0.685901	0.273483	0.0406164
AFDN_ENST00000344191	0.687422	0.272436	0.0401422
AFDN_ENST00000351017	0.685736	0.273883	0.0403807
AFDN_ENST00000392108	0.687828	0.271954	0.0402178
AFDN_ENST00000392112	0.686419	0.273061	0.0405197
AFDN_ENST00000400822	0.685408	0.274576	0.0400164
AFDN_ENST00000447894	0.685486	0.274252	0.0402622
AFF1	0.692489	0.2708	0.0367102
AFF1_ENST00000307808	0.691816	0.271051	0.0371333
AFF1_ENST00000544085	0.692115	0.269869	0.0380154
AFF2	0.68804	0.275602	0.036358
AFF2_ENST00000286437	0.689966	0.278736	0.0312981
AFF2_ENST00000342251	0.687163	0.276417	0.0364205
AFF2_ENST00000370457	0.687379	0.27628	0.0363412
AFF2_ENST00000370458	0.683919	0.268599	0.0474826
AFF3	0.692843	0.272079	0.0350779
AFF3_ENST00000317233	0.692984	0.27252	0.0344965
AFF3_ENST00000409236	0.692984	0.27252	0.0344965
AFF4	0.694596	0.264162	0.0412427
AFF4_ENST00000378595	0.701098	0.256849	0.0420525
AFG1L	0.693081	0.265908	0.0410112
AFG3L2	0.675463	0.285679	0.0388578
AFM	0.700124	0.257447	0.0424289
AFMID	0.680585	0.277749	0.0416665
AFMID_ENST00000409257	0.680594	0.277657	0.0417488
AFMID_ENST00000586731	0.653921	0.275164	0.0709153
AFMID_ENST00000588800	0.658174	0.28932	0.0525062
AFMID_ENST00000589256	0.66775	0.279194	0.0530563
AFMID_ENST00000591952	0.677636	0.271426	0.0509383
AFP	0.683435	0.264582	0.0519829
AFP_ENST00000226359	0.686409	0.262427	0.0511637
AFTPH	0.710978	0.250485	0.038537
AFTPH_ENST00000238856	0.710896	0.249344	0.0397597
AFTPH_ENST00000409933	0.710978	0.250485	0.038537
AFTPH_ENST00000422803	0.704545	0.269036	0.0264191
AGA	0.695716	0.268799	0.0354848
AGAP1	0.688317	0.278837	0.0328463
AGAP1_ENST00000336665	0.68709	0.279983	0.0329269
AGAP1_ENST00000409457	0.683684	0.283723	0.0325927
AGAP1_ENST00000409538	0.697201	0.274411	0.0283881
AGAP1_ENST00000428334	0.690158	0.277685	0.032157
AGAP1_ENST00000614409	0.68897	0.278839	0.0321911
AGAP1_ENST00000619456	0.68755	0.281503	0.0309469
AGAP2	0.678424	0.295028	0.0265486
AGAP2_ENST00000257897	0.680392	0.287967	0.0316408
AGAP3	0.688315	0.282391	0.0292935
AGAP3_ENST00000335367	0.704143	0.271814	0.0240437
AGAP3_ENST00000463381	0.685004	0.286642	0.0283544
AGAP3_ENST00000473312	0.687194	0.279427	0.0333795
AGAP3_ENST00000479901	0.687377	0.277633	0.0349893
AGAP3_ENST00000622464	0.687473	0.283069	0.0294585
AGAP4	0.69759	0.267115	0.0352952
AGAP4_ENST00000311652	0.697963	0.266742	0.0352952
AGAP4_ENST00000616763	0.697097	0.26747	0.0354335
AGAP4_ENST00000618171	0.698533	0.265772	0.0356947
AGAP5	0.69803	0.266648	0.0353219
AGAP5_ENST00000443782	0.698067	0.266583	0.03535
AGAP5_ENST00000581191	0.697864	0.266648	0.0354879
AGAP6	0.698491	0.265772	0.0357377
AGAP6_ENST00000374056	0.698975	0.265745	0.0352805
AGAP6_ENST00000618025	0.695668	0.267028	0.0373038
AGAP9	0.698271	0.264987	0.0367427
AGBL1	0.687567	0.277465	0.0349683
AGBL1_ENST00000441037	0.687686	0.277536	0.0347774
AGBL2	0.677354	0.275949	0.0466975
AGBL2_ENST00000357610	0.677422	0.275955	0.046623
AGBL2_ENST00000528244	0.677892	0.275892	0.0462159
AGBL3	0.692344	0.258919	0.048737
AGBL3_ENST00000435976	0.694677	0.2616	0.0437237
AGBL4	0.67821	0.277821	0.0439693
AGBL4_ENST00000334103	0.672293	0.290566	0.0371405
AGBL4_ENST00000371836	0.686819	0.258416	0.0547652
AGBL4_ENST00000371838	0.68048	0.270102	0.0494179
AGBL5	0.67748	0.290995	0.0315243
AGBL5_ENST00000323064	0.678803	0.286375	0.0348219
AGER	0.666251	0.296858	0.036891
AGER_ENST00000375055	0.670851	0.294062	0.0350875
AGER_ENST00000375065	0.661461	0.303909	0.0346299
AGER_ENST00000375067	0.66584	0.300679	0.0334808
AGER_ENST00000375070	0.663362	0.300796	0.0358414
AGER_ENST00000375076	0.662762	0.300742	0.0364951
AGER_ENST00000438221	0.674534	0.289864	0.0356019
AGER_ENST00000538695	0.66202	0.296399	0.041581
AGER_ENST00000620802	0.65778	0.298608	0.0436126
AGFG1	0.68515	0.276624	0.0382261
AGFG1_ENST00000310078	0.682241	0.279684	0.0380756
AGFG1_ENST00000373671	0.68125	0.280352	0.0383983
AGFG1_ENST00000409171	0.682636	0.279131	0.0382336
AGFG1_ENST00000409315	0.682289	0.27907	0.0386402
AGFG2	0.67803	0.296257	0.0257134
AGGF1	0.701555	0.250817	0.047628
AGGF1_ENST00000506806	0.684395	0.259184	0.056421
AGK	0.684064	0.27213	0.0438058
AGK_ENST00000473247	0.6861	0.271775	0.0421248
AGK_ENST00000492693	0.68799	0.252742	0.0592677
AGK_ENST00000629555	0.683405	0.277158	0.0394366
AGL	0.689625	0.252479	0.0578963
AGL_ENST00000361915	0.689625	0.252479	0.0578963
AGL_ENST00000370161	0.690382	0.252651	0.0569674
AGL_ENST00000370163	0.689625	0.252479	0.0578963
AGL_ENST00000370165	0.689625	0.252479	0.0578963
AGMAT	0.684978	0.29463	0.0203913
AGMO	0.685103	0.264575	0.0503221
AGO1	0.668576	0.293959	0.0374657
AGO1_ENST00000373206	0.671055	0.291417	0.0375277
AGO2	0.684251	0.280014	0.0357349
AGO2_ENST00000519980	0.68428	0.27929	0.0364302
AGO3	0.689311	0.2689	0.0417884
AGO3_ENST00000246314	0.691171	0.264501	0.0443283
AGO3_ENST00000324350	0.686648	0.275976	0.0373767
AGO3_ENST00000397828	0.686648	0.275976	0.0373767
AGO4	0.684421	0.272849	0.0427293
AGPAT1	0.67334	0.296176	0.0304835
AGPAT1_ENST00000336984	0.67334	0.296176	0.0304835
AGPAT1_ENST00000375104	0.67334	0.296176	0.0304835
AGPAT1_ENST00000375107	0.67334	0.296176	0.0304835
AGPAT1_ENST00000395496	0.67334	0.296176	0.0304835
AGPAT1_ENST00000395497	0.67334	0.296176	0.0304835
AGPAT2	0.697106	0.277659	0.0252344
AGPAT2_ENST00000371694	0.70502	0.271668	0.0233124
AGPAT2_ENST00000538402	0.697106	0.277659	0.0252344
AGPAT3	0.673635	0.288081	0.0382844
AGPAT3_ENST00000291572	0.673635	0.288081	0.0382844
AGPAT3_ENST00000327505	0.673635	0.288081	0.0382844
AGPAT3_ENST00000398058	0.673635	0.288081	0.0382844
AGPAT3_ENST00000398061	0.673635	0.288081	0.0382844
AGPAT3_ENST00000546158	0.673635	0.288081	0.0382844
AGPAT4	0.675411	0.285693	0.038896
AGPAT4_ENST00000366905	0.66591	0.288182	0.045908
AGPAT4_ENST00000366911	0.647159	0.308124	0.0447165
AGPAT5	0.676909	0.277913	0.0451781
AGPS	0.69006	0.268952	0.0409887
AGPS_ENST00000409888	0.678576	0.288151	0.0332737
AGR2	0.68173	0.280071	0.0381995
AGR2_ENST00000401412	0.696452	0.264323	0.0392245
AGR3	0.683289	0.261992	0.0547191
AGR3_ENST00000402239	0.685478	0.258415	0.0561068
AGRN	0.693555	0.280911	0.0255342
AGRN_ENST00000620552	0.693751	0.280563	0.0256854
AGRP	0.670477	0.300165	0.0293584
AGT	0.673212	0.298687	0.0281017
AGTPBP1	0.696288	0.262545	0.0411669
AGTPBP1_ENST00000357081	0.698901	0.258161	0.0429372
AGTPBP1_ENST00000376083	0.698914	0.257291	0.0437945
AGTPBP1_ENST00000628899	0.696185	0.261894	0.0419206
AGTR1	0.677821	0.286979	0.0351997
AGTR1_ENST00000349243	0.674826	0.289431	0.0357428
AGTR1_ENST00000402260	0.677385	0.287823	0.0347918
AGTR1_ENST00000404754	0.674826	0.289431	0.0357428
AGTR1_ENST00000461609	0.674826	0.289431	0.0357428
AGTR1_ENST00000474935	0.674826	0.289431	0.0357428
AGTR1_ENST00000475347	0.674826	0.289431	0.0357428
AGTR1_ENST00000497524	0.674826	0.289431	0.0357428
AGTR2	0.686573	0.273637	0.0397899
AGTRAP	0.669953	0.299849	0.0301978
AGTRAP_ENST00000376627	0.679853	0.29364	0.0265063
AGTRAP_ENST00000376629	0.669179	0.299547	0.0312742
AGTRAP_ENST00000376637	0.663892	0.305337	0.0307704
AGTRAP_ENST00000400895	0.674028	0.298145	0.0278279
AGTRAP_ENST00000452018	0.672142	0.297282	0.0305761
AGTRAP_ENST00000510878	0.671335	0.287903	0.0407619
AGXT	0.684929	0.286693	0.0283781
AGXT2	0.690386	0.273523	0.0360908
AGXT2_ENST00000510428	0.690307	0.272086	0.0376071
AGXT2_ENST00000618015	0.690307	0.272086	0.0376071
AHCTF1	0.686056	0.253754	0.0601899
AHCTF1_ENST00000366508	0.685963	0.2541	0.0599374
AHCY	0.691157	0.282016	0.0268274
AHCY_ENST00000538132	0.692574	0.281008	0.0264179
AHCYL1	0.682686	0.278148	0.0391658
AHCYL1_ENST00000359172	0.681464	0.279137	0.0393991
AHCYL1_ENST00000393614	0.681464	0.279137	0.0393991
AHCYL2	0.682303	0.27957	0.0381268
AHCYL2_ENST00000446544	0.682393	0.279749	0.0378579
AHCYL2_ENST00000474594	0.682888	0.273576	0.043536
AHCYL2_ENST00000490911	0.680598	0.277039	0.0423631
AHDC1	0.67242	0.304144	0.0234362
AHDC1_ENST00000247087	0.67242	0.304144	0.0234362
AHDC1_ENST00000642245	0.67242	0.304144	0.0234362
AHDC1_ENST00000642416	0.67242	0.304144	0.0234362
AHDC1_ENST00000644989	0.67242	0.304144	0.0234362
AHI1	0.702967	0.250355	0.0466781
AHI1_ENST00000265602	0.702967	0.250355	0.0466781
AHI1_ENST00000327035	0.70599	0.247848	0.046162
AHI1_ENST00000457866	0.702967	0.250355	0.0466781
AHI1_ENST00000488690	0.710095	0.245802	0.0441031
AHI1_ENST00000528103	0.717741	0.252374	0.0298854
AHI1_ENST00000534469	0.717741	0.252374	0.0298854
AHNAK	0.695476	0.282855	0.021669
AHNAK_ENST00000257247	0.685479	0.279146	0.0353755
AHNAK_ENST00000530124	0.697312	0.271277	0.0314113
AHNAK2	0.702667	0.271728	0.0256049
AHNAK2_ENST00000557457	0.697906	0.267966	0.0341272
AHR	0.686855	0.263764	0.0493815
AHR_ENST00000642825	0.687146	0.262936	0.0499176
AHRR	0.691587	0.278794	0.0296185
AHRR_ENST00000505113	0.691628	0.279592	0.0287796
AHRR_ENST00000506456	0.695781	0.274901	0.0293179
AHRR_ENST00000512529	0.693895	0.276247	0.0298587
AHRR_ENST00000515206	0.675742	0.299258	0.0249999
AHSA1	0.681882	0.273765	0.0443522
AHSA1_ENST00000535854	0.691046	0.266236	0.0427174
AHSA1_ENST00000555517	0.684456	0.260979	0.0545651
AHSG	0.676466	0.289331	0.0342022
AHSG_ENST00000273784	0.676093	0.289805	0.0341019
AHSP	0.678901	0.282151	0.0389487
AICDA	0.676037	0.281178	0.0427858
AICDA_ENST00000537228	0.675206	0.284297	0.040497
AIDA	0.671591	0.267538	0.0608708
AIDA_ENST00000355727	0.659361	0.271444	0.069195
AIF1	0.682429	0.284652	0.0329193
AIF1_ENST00000376049	0.691965	0.285351	0.0226849
AIF1L	0.693526	0.274042	0.0324321
AIF1L_ENST00000247291	0.701895	0.269925	0.0281801
AIF1L_ENST00000372297	0.736763	0.243058	0.0201785
AIF1L_ENST00000372298	0.694566	0.270839	0.0345948
AIF1L_ENST00000372300	0.706454	0.262784	0.0307617
AIF1L_ENST00000372301	0.71508	0.263731	0.0211887
AIF1L_ENST00000372302	0.702114	0.269528	0.0283588
AIFM1	0.674873	0.286074	0.0390528
AIFM1_ENST00000319908	0.674516	0.288369	0.0371145
AIFM1_ENST00000346424	0.673899	0.288122	0.0379787
AIFM1_ENST00000460436	0.68013	0.28132	0.0385499
AIFM1_ENST00000535724	0.673716	0.287978	0.0383056
AIFM2	0.685353	0.288669	0.0259781
AIFM2_ENST00000307864	0.685353	0.288669	0.0259781
AIFM2_ENST00000373248	0.685353	0.288669	0.0259781
AIFM3	0.684847	0.28832	0.0268333
AIFM3_ENST00000399163	0.684976	0.287974	0.0270498
AIFM3_ENST00000405089	0.684625	0.28851	0.0268659
AIFM3_ENST00000440238	0.684847	0.28832	0.0268333
AIG1	0.682946	0.275403	0.041651
AIG1_ENST00000275235	0.67979	0.277383	0.0428272
AIG1_ENST00000367596	0.671903	0.285873	0.0422236
AIG1_ENST00000494282	0.674917	0.28419	0.0408934
AIG1_ENST00000629020	0.672656	0.285951	0.0413922
AIG1_ENST00000646199	0.679758	0.279902	0.0403407
AIM2	0.689644	0.271036	0.0393202
AIMP1	0.687361	0.271573	0.0410658
AIMP1_ENST00000358008	0.687408	0.2691	0.0434918
AIMP1_ENST00000442366	0.687408	0.2691	0.0434918
AIMP2	0.686631	0.278739	0.0346294
AIMP2_ENST00000395236	0.689615	0.277263	0.0331225
AIMP2_ENST00000400479	0.685737	0.27937	0.034893
AIP	0.680964	0.281888	0.0371484
AIPL1	0.684033	0.282669	0.0332974
AIPL1_ENST00000250087	0.68439	0.283053	0.0325562
AIPL1_ENST00000570466	0.680273	0.285644	0.0340828
AIPL1_ENST00000571740	0.684978	0.280214	0.0348089
AIPL1_ENST00000574506	0.682025	0.284085	0.0338897
AIPL1_ENST00000575265	0.686672	0.278103	0.0352257
AIPL1_ENST00000576307	0.676719	0.289153	0.0341284
AIPL1_ENST00000576776	0.686457	0.282762	0.0307806
AIRE	0.686673	0.287773	0.0255545
AJAP1	0.693714	0.277617	0.0286695
AJAP1_ENST00000378190	0.693714	0.277617	0.0286695
AJM1	0.703442	0.273434	0.0231246
AJUBA	0.675401	0.293658	0.0309417
AJUBA_ENST00000361265	0.675401	0.293658	0.0309417
AJUBA_ENST00000397388	0.702563	0.261596	0.0358409
AK1	0.68509	0.285394	0.0295168
AK1_ENST00000373156	0.678756	0.290753	0.0304907
AK1_ENST00000373176	0.678756	0.290753	0.0304907
AK1_ENST00000644144	0.678756	0.290753	0.0304907
AK2	0.675723	0.298451	0.0258262
AK2_ENST00000373449	0.674653	0.299196	0.026151
AK2_ENST00000467905	0.674927	0.29869	0.0263836
AK2_ENST00000480134	0.676651	0.290538	0.0328108
AK2_ENST00000487289	0.692163	0.287101	0.0207359
AK2_ENST00000548033	0.671793	0.299944	0.028263
AK2_ENST00000626911	0.660204	0.308517	0.0312792
AK2_ENST00000629371	0.676651	0.290538	0.0328108
AK3	0.677996	0.285522	0.0364819
AK3_ENST00000359883	0.67453	0.279403	0.0460668
AK3_ENST00000447596	0.675838	0.28832	0.0358422
AK3_ENST00000611749	0.67453	0.279403	0.0460668
AK4	0.67475	0.286764	0.0384859
AK4_ENST00000327299	0.67475	0.286764	0.0384859
AK4_ENST00000545314	0.67475	0.286764	0.0384859
AK4_ENST00000546702	0.674959	0.279422	0.0456193
AK5	0.679241	0.275262	0.0454972
AK5_ENST00000344720	0.679944	0.27399	0.0460661
AK5_ENST00000478255	0.678357	0.285543	0.0361005
AK6	0.69321	0.254611	0.0521786
AK6_ENST00000380818	0.696159	0.248965	0.0548763
AK6_ENST00000502819	0.667736	0.298013	0.0342512
AK6_ENST00000512561	0.703128	0.244373	0.0524985
AK6_ENST00000618980	0.698226	0.256783	0.0449911
AK7	0.687033	0.271174	0.0417927
AK7_ENST00000555570	0.69382	0.272933	0.033247
AK8	0.67861	0.28707	0.0343203
AK9	0.694381	0.254094	0.0515252
AK9_ENST00000285397	0.693821	0.251915	0.0542645
AK9_ENST00000355283	0.687843	0.258996	0.0531609
AK9_ENST00000368948	0.697157	0.247293	0.0555507
AKAIN1	0.657303	0.279964	0.0627329
AKAIN1_ENST00000434239	0.668381	0.278915	0.052704
AKAP1	0.680463	0.285172	0.034365
AKAP1_ENST00000314126	0.681122	0.289024	0.0298542
AKAP1_ENST00000337714	0.680463	0.285172	0.034365
AKAP1_ENST00000539273	0.680463	0.285172	0.034365
AKAP1_ENST00000571629	0.680463	0.285172	0.034365
AKAP1_ENST00000572557	0.680463	0.285172	0.034365
AKAP10	0.697307	0.2587	0.0439926
AKAP10_ENST00000395536	0.698061	0.255613	0.0463261
AKAP11	0.705566	0.25145	0.0429841
AKAP12	0.697694	0.258533	0.0437721
AKAP12_ENST00000253332	0.697694	0.258533	0.0437721
AKAP12_ENST00000354675	0.698775	0.256967	0.0442574
AKAP12_ENST00000359755	0.699061	0.256482	0.0444578
AKAP13	0.693292	0.269402	0.0373059
AKAP13_ENST00000394510	0.693421	0.267289	0.03929
AKAP13_ENST00000394518	0.69356	0.269317	0.037123
AKAP13_ENST00000560302	0.69168	0.275006	0.0333136
AKAP13_ENST00000560579	0.693857	0.266521	0.0396219
AKAP14	0.688491	0.262171	0.0493376
AKAP14_ENST00000334356	0.69393	0.253863	0.0522068
AKAP14_ENST00000371422	0.692555	0.252089	0.0553564
AKAP14_ENST00000371425	0.69393	0.253863	0.0522068
AKAP17A	0.701013	0.268871	0.0301159
AKAP17A_ENST00000381261	0.688857	0.278576	0.0325663
AKAP2	0.688443	0.274397	0.0371607
AKAP2_ENST00000259318	0.688607	0.27356	0.0378334
AKAP2_ENST00000374525	0.688578	0.274241	0.0371802
AKAP3	0.689936	0.273008	0.0370558
AKAP3_ENST00000545990	0.689936	0.273008	0.0370558
AKAP4	0.692774	0.264773	0.0424532
AKAP4_ENST00000376064	0.691316	0.265993	0.0426909
AKAP5	0.698605	0.249435	0.0519603
AKAP5_ENST00000320636	0.698605	0.249435	0.0519603
AKAP6	0.701225	0.25524	0.043534
AKAP6_ENST00000557272	0.690777	0.261425	0.0477988
AKAP6_ENST00000557354	0.694297	0.259122	0.0465812
AKAP7	0.690961	0.262408	0.0466308
AKAP7_ENST00000263050	0.691159	0.27401	0.0348313
AKAP7_ENST00000342266	0.69505	0.270544	0.0344061
AKAP7_ENST00000474850	0.692188	0.267855	0.0399571
AKAP7_ENST00000537868	0.694144	0.264948	0.0409081
AKAP7_ENST00000541650	0.692816	0.258875	0.0483093
AKAP8	0.692345	0.274478	0.0331767
AKAP8L	0.702179	0.261002	0.0368188
AKAP8L_ENST00000595465	0.701087	0.262283	0.0366299
AKAP9	0.696802	0.237122	0.0660763
AKAP9_ENST00000358100	0.702465	0.2301	0.0674355
AKAP9_ENST00000359028	0.697053	0.236923	0.0660235
AKAP9_ENST00000394564	0.706583	0.226645	0.0667715
AKAP9_ENST00000619023	0.70718	0.222828	0.0699916
AKIP1	0.689353	0.277454	0.033193
AKIP1_ENST00000299576	0.681072	0.285688	0.0332405
AKIP1_ENST00000309357	0.691554	0.277347	0.031099
AKIP1_ENST00000396648	0.681072	0.285688	0.0332405
AKIP1_ENST00000525005	0.690067	0.273875	0.0360577
AKIP1_ENST00000529876	0.681354	0.282061	0.0365847
AKIP1_ENST00000534147	0.689353	0.277454	0.033193
AKIP1_ENST00000534506	0.681354	0.282061	0.0365847
AKIRIN1	0.689116	0.259346	0.0515381
AKIRIN1_ENST00000372984	0.693874	0.265428	0.0406987
AKIRIN1_ENST00000446189	0.692045	0.263689	0.0442663
AKIRIN2	0.671741	0.281012	0.0472466
AKNA	0.681132	0.284661	0.0342073
AKNA_ENST00000223791	0.676304	0.292205	0.0314906
AKNA_ENST00000312033	0.68814	0.273681	0.0381795
AKNA_ENST00000374075	0.679589	0.287369	0.033042
AKNA_ENST00000374079	0.66652	0.30237	0.0311101
AKNA_ENST00000374088	0.681132	0.284661	0.0342073
AKNAD1	0.690263	0.252375	0.0573622
AKNAD1_ENST00000369994	0.691438	0.250268	0.0582948
AKNAD1_ENST00000369995	0.690379	0.252666	0.0569546
AKR1A1	0.661366	0.302222	0.0364122
AKR1A1_ENST00000351829	0.661366	0.302222	0.0364122
AKR1A1_ENST00000471651	0.668654	0.294679	0.0366668
AKR1A1_ENST00000621846	0.661366	0.302222	0.0364122
AKR1B1	0.68219	0.283841	0.0339692
AKR1B10	0.681449	0.283983	0.034568
AKR1B15	0.68549	0.278536	0.0359743
AKR1B15_ENST00000423958	0.68549	0.278536	0.0359743
AKR1C1	0.66838	0.29237	0.0392505
AKR1C1_ENST00000380859	0.676224	0.283929	0.0398478
AKR1C2	0.671348	0.290855	0.0377965
AKR1C2_ENST00000421196	0.668815	0.293412	0.0377728
AKR1C2_ENST00000455190	0.680188	0.280078	0.039734
AKR1C3	0.676537	0.284949	0.0385144
AKR1C3_ENST00000439082	0.674732	0.286073	0.0391946
AKR1C3_ENST00000605149	0.674199	0.283212	0.0425885
AKR1C4	0.677209	0.281479	0.0413116
AKR1C4_ENST00000263126	0.677209	0.281479	0.0413116
AKR1D1	0.674683	0.28324	0.0420772
AKR1D1_ENST00000411726	0.677176	0.278042	0.0447823
AKR1D1_ENST00000432161	0.667324	0.290745	0.0419305
AKR1E2	0.677298	0.289089	0.0336134
AKR1E2_ENST00000334019	0.676959	0.288604	0.0344374
AKR1E2_ENST00000345253	0.680747	0.282806	0.0364473
AKR1E2_ENST00000532248	0.677529	0.288608	0.0338627
AKR7A2	0.691342	0.276004	0.0326545
AKR7A3	0.692283	0.274141	0.033576
AKR7L	0.69077	0.274483	0.0347465
AKT1	0.695156	0.271993	0.0328508
AKT1_ENST00000349310	0.695156	0.271993	0.0328508
AKT1_ENST00000402615	0.695156	0.271993	0.0328508
AKT1_ENST00000407796	0.695156	0.271993	0.0328508
AKT1_ENST00000554848	0.695156	0.271993	0.0328508
AKT1_ENST00000555528	0.695156	0.271993	0.0328508
AKT1S1	0.695385	0.282758	0.0218569
AKT1S1_ENST00000344175	0.693085	0.283632	0.0232839
AKT1S1_ENST00000391831	0.693085	0.283632	0.0232839
AKT1S1_ENST00000391832	0.693085	0.283632	0.0232839
AKT1S1_ENST00000391833	0.693085	0.283632	0.0232839
AKT1S1_ENST00000391834	0.693085	0.283632	0.0232839
AKT2	0.697453	0.273544	0.0290037
AKT2_ENST00000311278	0.695952	0.273948	0.0301001
AKT2_ENST00000424901	0.695952	0.273948	0.0301001
AKT2_ENST00000579047	0.700774	0.270118	0.0291079
AKT3	0.70115	0.24901	0.0498398
AKT3_ENST00000336199	0.70007	0.248729	0.0512019
AKT3_ENST00000366539	0.70115	0.24901	0.0498398
AKT3_ENST00000366540	0.70007	0.248729	0.0512019
AKTIP	0.688466	0.271479	0.0400552
AKTIP_ENST00000394657	0.688919	0.27101	0.040071
AKTIP_ENST00000570004	0.688919	0.27101	0.040071
AL021546.1	0.686442	0.28733	0.0262289
AL021997.3	0.69653	0.258016	0.0454536
AL022312.1	0.646783	0.30708	0.0461368
AL022318.4	0.67981	0.272967	0.047223
AL031777.3	0.653956	0.314616	0.0314279
AL032819.3	0.696759	0.272854	0.0303868
AL034430.1	0.698618	0.234526	0.0668559
AL035078.4	0.699639	0.258868	0.0414935
AL035425.2	0.754936	0.226387	0.018677
AL035460.1	0.666005	0.309378	0.0246164
AL049557.1	0.675836	0.285713	0.0384509
AL049629.2_ENST00000534312	0.664122	0.291834	0.0440437
AL049634.2_ENST00000564763	0.677917	0.288448	0.0336348
AL096814.1	0.685805	0.273876	0.0403192
AL096814.1_ENST00000623004	0.675256	0.286137	0.0386074
AL096870.1	0.680443	0.292636	0.0269215
AL109810.2	0.677584	0.278225	0.0441913
AL110118.2	0.672755	0.276663	0.0505821
AL117348.2	0.637793	0.336016	0.0261908
AL121758.1	0.665557	0.294392	0.0400515
AL121845.2	0.682015	0.294072	0.0239128
AL121900.2	0.677142	0.277521	0.0453372
AL132671.2	0.675609	0.285321	0.0390705
AL132780.3	0.672346	0.28267	0.0449847
AL136295.1	0.672682	0.289793	0.0375258
AL136295.3	0.672495	0.293553	0.0339526
AL136373.1	0.713765	0.276713	0.00952189
AL136454.1	0.697852	0.272558	0.0295899
AL136454.1_ENST00000443181	0.697852	0.272558	0.0295899
AL138694.1	0.680761	0.27197	0.0472692
AL139011.2	0.696507	0.258226	0.0452667
AL139260.3	0.653551	0.291345	0.0551036
AL139300.1	0.681384	0.272417	0.0461989
AL139353.1	0.670307	0.278487	0.051206
AL157392.5	0.696749	0.264225	0.0390259
AL159163.1	0.691391	0.256457	0.0521515
AL160272.2	0.697127	0.268854	0.0340192
AL162231.1	0.683126	0.276573	0.0403015
AL162231.1_ENST00000416454	0.708411	0.228445	0.0631445
AL162231.1_ENST00000423809	0.708411	0.228445	0.0631445
AL162231.1_ENST00000544078	0.683126	0.276573	0.0403015
AL162231.3	0.681421	0.277802	0.0407778
AL162417.1	0.674476	0.292274	0.0332498
AL163195.3	0.719216	0.237322	0.0434621
AL163636.2	0.661393	0.328392	0.0102149
AL353572.3	0.656691	0.298856	0.0444528
AL354761.1	0.683347	0.280319	0.0363337
AL355102.2	0.700731	0.272343	0.0269261
AL355315.1	0.668627	0.289026	0.0423471
AL355916.3	0.691279	0.270436	0.0382853
AL358075.4	0.6843	0.264435	0.051265
AL358113.1	0.689343	0.273908	0.0367488
AL360181.3	0.683786	0.292411	0.0238031
AL365214.3	0.703928	0.263366	0.0327059
AL391650.1	0.638989	0.330575	0.0304365
AL391650.1_ENST00000433939	0.638989	0.330575	0.0304365
AL449266.1	0.682666	0.263489	0.0538442
AL451007.3	0.696352	0.270754	0.0328948
AL512428.1	0.685703	0.271203	0.0430935
AL590132.1	0.675612	0.287413	0.0369751
AL590132.1_ENST00000638983	0.677844	0.286733	0.0354227
AL592490.1	0.682836	0.285601	0.0315629
AL603832.3	0.686513	0.281863	0.0316248
AL645922.1	0.6822	0.278786	0.0390142
AL645922.1_ENST00000477310	0.682862	0.278767	0.0383708
AL645941.2	0.676259	0.284185	0.0395556
AL662820.1	0.642785	0.322072	0.035143
AL662884.4	0.68972	0.288663	0.021617
AL662899.1	0.709378	0.27389	0.0167324
AL662899.2	0.672765	0.279017	0.0482182
AL662899.2_ENST00000375880	0.688379	0.269629	0.0419925
AL669918.1	0.676149	0.288513	0.0353381
AL672043.1	0.672409	0.291548	0.0360431
AL672142.1	0.668748	0.270197	0.061055
AL691442.1	0.693911	0.273903	0.0321865
AL772284.2	0.702979	0.266565	0.0304562
AL845331.2	0.688115	0.285951	0.0259342
AL929554.1	0.652675	0.334467	0.012858
ALAD	0.677302	0.295506	0.0271917
ALAS1	0.688689	0.278074	0.0332376
ALAS1_ENST00000310271	0.688689	0.278074	0.0332376
ALAS1_ENST00000469224	0.688689	0.278074	0.0332376
ALAS1_ENST00000484952	0.688689	0.278074	0.0332376
ALAS2	0.682103	0.28829	0.029607
ALAS2_ENST00000335854	0.682708	0.287889	0.0294028
ALAS2_ENST00000396198	0.682344	0.287833	0.0298229
ALB	0.697687	0.262642	0.0396709
ALB_ENST00000401494	0.693541	0.267331	0.0391279
ALB_ENST00000415165	0.695411	0.26776	0.0368294
ALB_ENST00000503124	0.693678	0.266668	0.0396532
ALB_ENST00000509063	0.699767	0.260889	0.0393441
ALB_ENST00000621085	0.698702	0.259643	0.0416552
ALB_ENST00000621628	0.700128	0.25882	0.041052
ALCAM	0.690096	0.269634	0.0402705
ALCAM_ENST00000472644	0.687893	0.271326	0.0407808
ALCAM_ENST00000486979	0.691494	0.267477	0.0410288
ALDH16A1	0.677028	0.29141	0.0315622
ALDH16A1_ENST00000455361	0.67604	0.291676	0.0322845
ALDH16A1_ENST00000540132	0.678413	0.29267	0.0289168
ALDH18A1	0.684339	0.284051	0.0316101
ALDH18A1_ENST00000371221	0.684153	0.284185	0.0316621
ALDH1A1	0.681931	0.278456	0.0396129
ALDH1A1_ENST00000376939	0.677268	0.282478	0.0402543
ALDH1A2	0.679601	0.284496	0.0359034
ALDH1A2_ENST00000347587	0.680938	0.281135	0.0379268
ALDH1A2_ENST00000537372	0.677722	0.284159	0.0381189
ALDH1A2_ENST00000558231	0.677588	0.284546	0.0378657
ALDH1A2_ENST00000559517	0.676829	0.288176	0.0349951
ALDH1A3	0.678331	0.290679	0.0309905
ALDH1A3_ENST00000346623	0.675336	0.292236	0.032428
ALDH1A3_ENST00000557963	0.681133	0.302311	0.0165563
ALDH1B1	0.676592	0.293061	0.030347
ALDH1L1	0.683321	0.289071	0.0276085
ALDH1L1_ENST00000393431	0.680414	0.288505	0.0310814
ALDH1L1_ENST00000393434	0.683976	0.288081	0.027943
ALDH1L1_ENST00000452905	0.684795	0.288313	0.026892
ALDH1L1_ENST00000455064	0.680414	0.288505	0.0310814
ALDH1L1_ENST00000472186	0.683976	0.288081	0.027943
ALDH1L2	0.682012	0.28032	0.0376683
ALDH2	0.682673	0.28456	0.0327671
ALDH2_ENST00000416293	0.683045	0.283953	0.033002
ALDH3A1	0.684424	0.283926	0.0316505
ALDH3A1_ENST00000225740	0.684424	0.283926	0.0316505
ALDH3A1_ENST00000395555	0.681512	0.287077	0.0314115
ALDH3A1_ENST00000444455	0.684424	0.283926	0.0316505
ALDH3A1_ENST00000494157	0.686323	0.284466	0.0292106
ALDH3A2	0.683268	0.280185	0.0365473
ALDH3A2_ENST00000176643	0.684816	0.279286	0.0358988
ALDH3A2_ENST00000395575	0.684816	0.279286	0.0358988
ALDH3A2_ENST00000571163	0.705952	0.268557	0.0254916
ALDH3A2_ENST00000579855	0.684816	0.279286	0.0358988
ALDH3A2_ENST00000581518	0.683268	0.280185	0.0365473
ALDH3A2_ENST00000626500	0.679918	0.28312	0.0369619
ALDH3A2_ENST00000630662	0.705952	0.268557	0.0254916
ALDH3A2_ENST00000631291	0.683566	0.278202	0.0382314
ALDH3B1	0.687983	0.284665	0.0273523
ALDH3B1_ENST00000612297	0.689801	0.283	0.0271989
ALDH3B1_ENST00000614849	0.687983	0.284665	0.0273523
ALDH3B1_ENST00000615463	0.674546	0.29389	0.0315634
ALDH3B1_ENST00000617288	0.686405	0.286591	0.0270032
ALDH3B2	0.682182	0.286976	0.030842
ALDH3B2_ENST00000530069	0.682182	0.286976	0.030842
ALDH4A1	0.677227	0.292809	0.0299637
ALDH4A1_ENST00000290597	0.677227	0.292809	0.0299637
ALDH4A1_ENST00000538309	0.677048	0.292974	0.0299779
ALDH4A1_ENST00000538839	0.676253	0.294163	0.0295843
ALDH5A1	0.677796	0.290171	0.0320327
ALDH5A1_ENST00000357578	0.678525	0.289443	0.032032
ALDH5A1_ENST00000491546	0.677186	0.292535	0.0302795
ALDH6A1	0.676458	0.289187	0.0343555
ALDH6A1_ENST00000350259	0.677724	0.289341	0.0329342
ALDH6A1_ENST00000555126	0.672473	0.294233	0.0332942
ALDH7A1	0.68014	0.282748	0.0371115
ALDH7A1_ENST00000413020	0.670809	0.287806	0.0413851
ALDH7A1_ENST00000553117	0.678327	0.284035	0.0376377
ALDH7A1_ENST00000636743	0.680123	0.283949	0.0359275
ALDH7A1_ENST00000636879	0.681238	0.281625	0.0371368
ALDH7A1_ENST00000636886	0.683313	0.281621	0.0350665
[truncated: 54,432 more rows]
