# Supplementary material for: Use of signals of positive and negative selection to distinguish cancer genes and passenger genes
Source: eLife. 2021 Jan 11;10:e59629. doi: 10.7554/eLife.59629 (PMC7877913; doi:10.7554/eLife.59629)
Supplement: Supplementary file 29. — The column marked 'Expected' indicates the parameters expected if we assume that the structure of the genetic code determines the probability of somatic substitutions. [file elife-59629-supp29.xlsx]

## Sheet: Supplementary file 29
Parameters of different datasets	Number of transcripts in the dataset	Mean	SD	Expected	Number of transcripts in the dataset	Mean	SD	Number of transcripts in the dataset	Mean	SD	Number of transcripts in the dataset	Mean	SD	Number of transcripts in the dataset	Number of genes	Mean	SD
					PG_SOf_1SD			CG_SOf_1SD			PG_SOf_2SD			CG_SOf_2SD
fS_all COSMIC genes	13803	0.24358	0.06191	0.24408	7605	0.24548	0.03079	6198	0.24124	0.08581	12743	0.24524	0.05093	1060	833	0.22362	0.13531
fM_all COSMIC genes	13803	0.70896	0.05556	0.714026	7605	0.71084	0.0274	6198	0.70665	0.0771	12743	0.71025	0.04556	1060	833	0.69346	0.12245
fN_all COSMIC genes	13803	0.04746	0.03218	0.0418944	7605	0.04368	0.01572	6198	0.0521	0.04432	12743	0.04451	0.02199	1060	833	0.08292	0.07946
fS_CGC genes (without OGs and TSGs)	741	0.20576	0.07165		301	0.23748	0.03162	440	0.18407	0.08252	599	0.22155	0.05362	142	109	0.13918	0.09606
fM_CGC genes (without OGs and TSGs)	741	0.736	0.06674		301	0.71736	0.02726	440	0.74876	0.08124	599	0.72918	0.04788	142	109	0.76479	0.11236
fN_CGC genes (without OGs and TSGs)	741	0.05823	0.04461		301	0.04516	0.0167	440	0.06717	0.05446	599	0.04927	0.02319	142	109	0.09603	0.0799
fS_OG	88	0.11148	0.07223		4	0.23595	0.04813	84	0.10555	0.06784	26	0.19345	0.0618	62	44	0.0771	0.04255
fM_OG	88	0.8563	0.08224		4	0.71816	0.028	84	0.86288	0.07809	26	0.75748	0.0469	62	44	0.89774	0.05327
fN_OG	88	0.03222	0.02402		4	0.04589	0.02397	84	0.03157	0.02397	26	0.04906	0.02553	62	44	0.02516	0.0196
fS_TSG	135	0.09532	0.04907		0			135	0.09532	0.04907	16	0.16667	0.03342	119	63	0.08572	0.04253
fM_TSG	135	0.70828	0.09941		0			135	0.70828	0.09941	16	0.76137	0.04267	119	63	0.70115	0.10275
fN_TSG	135	0.1964	0.11063		0			135	0.1964	0.11063	16	0.07196	0.03294	119	63	0.21313	0.10667
fS_COSMIC genes (without CGCs, OGs and TSGs)	12839	0.24822	0.05753		7300	0.24581	0.0307	5539	0.2514	0.08007	12102	0.24662	0.05036	737	617	0.27448	0.12364
fM_COSMIC genes (without CGCs, OGs and TSGs)	12839	0.7064	0.05211		7300	0.71057	0.02737	5539	0.7009	0.07249	12102	0.70915	0.04515	737	617	0.66129	0.10809
fN_COSMIC genes (without CGCs, OGs and TSGs)	12839	0.04538	0.02492		7300	0.04362	0.01568	5539	0.0477	0.03326	12102	0.04423	0.02186	737	617	0.06423	0.05099
					PG_SOr2_1SD			CG_SOr2_1SD			PG_SOr2_2SD			CG_SOr2_2SD
rSM_all COSMIC genes	13803	0.35176	0.11639	0.341837	9059	0.34523	0.06137	4744	0.36424	0.17886	13023	0.34597	0.09567	780	611	0.44839	0.2777
rNM_all COSMIC genes	13803	0.06781	0.0561	0.0586735	9059	0.0607	0.02595	4744	0.08139	0.08712	13023	0.06357	0.03265	780	611	0.13858	0.18061
rNS_all COSMIC genes	13801	0.25257	0.69687	0.171642	9059	0.18403	0.09138	4742	0.3835	1.1711	13023	0.2066	0.13893	778		1.02199	2.77008
rSM_CGC genes (without OGs and TSGs)	741	0.28974	0.13394		370	0.32729	0.06128	371	0.25229	0.17122	662	0.29387	0.10142	79	57	0.25511	0.28577
rNM_CGC genes (without OGs and TSGs)	741	0.08135	0.07534		370	0.06217	0.02705	371	0.10048	0.09944	662	0.06862	0.03424	79	57	0.18805	0.17611
rNS_CGC genes (without OGs and TSGs)	740	0.38238	0.54394		370	0.20026	0.10118	370	0.56449	0.71818	662	0.27358	0.18476	78		1.30573	1.25741
rSM_OG	88	0.13971	0.10621		8	0.29239	0.06677	80	0.12444	0.09711	48	0.20698	0.09755	40	32	0.05898	0.03798
rNM_OG	88	0.03936	0.0313		8	0.06933	0.03774	80	0.03636	0.0292	48	0.05242	0.03259	40	32	0.02368	0.02106
rNS_OG	88	0.36127	0.26399		8	0.25915	0.16798	80	0.37148	0.27034	48	0.28944	0.18901	40	32	0.44747	0.31375
rSM_TSG	135	0.13693	0.06879		3	0.26271	0.03763	132	0.13407	0.0667	32	0.18545	0.0551	103	54	0.12185	0.06577
rNM_TSG	135	0.31524	0.31575		3	0.03958	0.0197	132	0.3215	0.31653	32	0.1066	0.04883	103	54	0.38006	0.33519
rNS_TSG	135	3.92588	5.66261		3	0.15936	0.091	132	4.01148	5.69799	32	0.613	0.30571	103	54	4.95512	6.13054
rSM_COSMIC genes	12839	0.35905	0.11107		8678	0.34607	0.06123	4161	0.38613	0.17078	12281	0.34974	0.09383	558	468	0.56394	0.21504
rNM_COSMIC genes	12839	0.06462	0.03659		8678	0.06063	0.02589	4161	0.07294	0.05129	12281	0.06323	0.03241	558	468	0.09524	0.08193
rNS_COSMIC genes	12838	0.20571	0.15712		8678	0.18327	0.09078	4160	0.25252	0.23615	12281	0.20161	0.13241	557		0.2962	0.41734
					PG_SOr3_1SD			CG_SOr3_1SD			PG_SOr3_2SD			CG_SOr3_2SD
rSMN_all COSMIC genes	13803	0.33112	0.11262	0.322892	9403	0.32572	0.05962	4400	0.34267	0.1789	13052	0.3259	0.09265	751	588	0.42189	0.27448
rMSN_all COSMIC genes	13802	2.63776	2.73895	2.49682	9403	2.52734	0.42422	4399	2.87379	4.80358	13052	2.58911	0.68355	750		3.48442	11.3722
rNSM_all COSMIC genes	13803	0.05133	0.04737	0.0437262	9403	0.04568	0.02083	4400	0.0634	0.07682	13052	0.04812	0.02561	751	588	0.10716	0.16304
rSMN_CGC genes (without OGs and TSGs)	741	0.27033	0.1287		394	0.31018	0.06085	347	0.22509	0.1654	661	0.27465	0.09686	80	58	0.23467	0.27446
rMSN_CGC genes (without OGs and TSGs)	741	3.13779	2.38006		394	2.62681	0.46368	347	3.71798	3.35203	661	3.01209	0.93607	80	58	4.17636	6.67208
rNSM_CGC genes (without OGs and TSGs)	741	0.06474	0.0624		394	0.04767	0.0222	347	0.08412	0.08402	661	0.05355	0.02711	80	58	0.1572	0.14363
rSMN_OG	88	0.13363	0.10266		11	0.28008	0.08197	77	0.11271	0.08737	53	0.1892	0.09511	35	28	0.04949	0.03214
rMSN_OG	88	15.3597	30.0747		11	2.87471	0.49506	77	17.1433	31.774	53	4.5569	1.50585	35	28	31.7183	43.0531
rNSM_OG	88	0.03394	0.02621		11	0.04897	0.0298	77	0.03179	0.02514	53	0.04276	0.02629	35	28	0.02058	0.01988
rSMN_TSG	135	0.10865	0.06128		3	0.25323	0.04142	132	0.10537	0.05767	32	0.16781	0.05041	103	54	0.09027	0.05218
rMSN_TSG	135	2.82486	1.32924		3	3.31556	0.1912	132	2.81371	1.34206	32	3.6661	1.02577	103	54	2.56351	1.30782
rNSM_TSG	135	0.27937	0.2783		3	0.03167	0.01629	132	0.285	0.2789	32	0.09	0.04083	103	54	0.3382	0.29411
rSMN_COSMIC genes	12839	0.33832	0.10732		8995	0.32648	0.05942	3844	0.36603	0.17064	12306	0.32965	0.09086	533	448	0.53853	0.21242
rMSN_COSMIC genes	12838	2.51973	0.6723		8995	2.5223	0.42147	3843	2.51372	1.04608	12306	2.55512	0.63708	532		1.70118	0.90613
rNSM_COSMIC genes	12839	0.04828	0.0284		8995	0.04559	0.02075	3844	0.05455	0.04039	12306	0.04774	0.02536	533	448	0.06069	0.0666
					PG_SSIf_1SD			CG_SSIf_1SD			PG_SSIf_2SD			CG_SSIf_2SD
indel_fS all COSMIC genes	13930	0.24082	0.06203		7791	0.24323	0.03082	6139	0.23777	0.08666	12719	0.24326	0.05094	1211	966	0.21525	0.12768
indel_fM all COSMIC genes	13930	0.70086	0.05701		7791	0.70443	0.02766	6139	0.69633	0.0798	12719	0.70344	0.04559	1211	966	0.67373	0.1215
indel_fN all COSMIC genes	13930	0.05832	0.04151		7791	0.05235	0.01954	6139	0.0659	0.05764	12719	0.0533	0.02667	1211	966	0.11102	0.09649
indel_fS CGC genes (without OGs and TSGs)	748	0.20259	0.07173		305	0.23522	0.03201	443	0.18012	0.08216	595	0.21881	0.05403	153	115	0.13952	0.09406
indel_fM CGC genes (without OGs and TSGs)	748	0.72428	0.07381		305	0.70949	0.02752	443	0.73447	0.09182	595	0.72145	0.04827	153	115	0.7353	0.13234
indel_fN CGC genes (without OGs and TSGs)	748	0.07313	0.06322		305	0.05529	0.02176	443	0.08541	0.07783	595	0.05975	0.02957	153	115	0.12518	0.11312
indel_fS OG	88	0.11083	0.07196		5	0.22382	0.04665	83	0.10402	0.06755	26	0.19241	0.06195	62	44	0.07662	0.04227
indel_fM OG	88	0.8522	0.0844		5	0.71604	0.02778	83	0.8604	0.0795	26	0.75301	0.04596	62	44	0.89379	0.0578
indel_fN OG	88	0.03697	0.03013		5	0.06015	0.02548	83	0.03558	0.02994	26	0.05458	0.02813	62	44	0.02959	0.02798
indel_fS TSG	135	0.09125	0.04761		1	0.22893		134	0.09022	0.04626	12	0.15967	0.03504	123	64	0.08457	0.04328
indel_fM TSG	135	0.67897	0.1098		1	0.74881		134	0.67845	0.11004	12	0.75495	0.04233	123	64	0.67156	0.11161
indel_fN TSG	135	0.22978	0.12143		1	0.02226		134	0.23133	0.12054	12	0.08538	0.0449	123	64	0.24387	0.11731
indel_fS COSMIC genes	12959	0.24547	0.05768		7480	0.24357	0.03071	5479	0.24806	0.08106	12086	0.24465	0.05034	873	743	0.25678	0.1191
indel_fM COSMIC genes	12959	0.69871	0.05301		7480	0.70421	0.02765	5479	0.6912	0.07421	12086	0.7024	0.04519	873	743	0.64762	0.10327
indel_fN COSMIC genes	12959	0.05582	0.03368		7480	0.05222	0.01943	5479	0.06074	0.04611	12086	0.05295	0.02644	873	743	0.09561	0.07399
					PG_SSIr2_1SD			CG_SSIr2_1SD			PG_SSIr2_2SD			CG_SSIr2_2SD
indel_rSM; all COSMIC genes	13930	0.35152	0.11639		9412	0.34507	0.0615	4518	0.36495	0.18336	13069	0.34576	0.09598	861	691	0.43891	0.26695
indel rNM; all COSMIC genes	13930	0.08537	0.07984		9412	0.07309	0.03403	4518	0.11094	0.12758	13069	0.07796	0.04247	861	691	0.19782	0.24971
indel_rNS; all COSMIC genes	13928	0.32151	1.12704		9412	0.22193	0.1179	4516	0.52904	1.95587	13069	0.25431	0.18326	859		1.3439	4.35791
indel_rSM CGC genes (without OGs and TSGs)	748	0.28946	0.13415		380	0.32689	0.06209	368	0.25082	0.17235	662	0.293	0.10209	86	61	0.2622	0.27615
indel_rNM CGC genes (without OGs and TSGs)	748	0.10897	0.15299		380	0.07535	0.03547	368	0.14369	0.20968	662	0.08479	0.04608	86	61	0.29509	0.38677
indel_rNS CGC genes (without OGs and TSGs)	747	0.60409	3.38466		380	0.24228	0.12731	367	0.97873	4.80173	662	0.33868	0.24016	85		2.67122	9.81868
indel_rSM OG	88	0.13968	0.10622		10	0.30218	0.07995	78	0.11884	0.09017	48	0.20696	0.09755	40	32	0.05894	0.03798
indel_rNM OG	88	0.04572	0.04022		10	0.07171	0.0403	78	0.04239	0.03923	48	0.06227	0.04428	40	32	0.02587	0.02245
indel_rNS OG	88	0.41803	0.32391		10	0.26762	0.17764	78	0.43731	0.33397	48	0.35238	0.3077	40	32	0.49681	0.32905
indel_rSM TSG	135	0.13692	0.06879		3	0.26271	0.03763	132	0.13406	0.0667	37	0.17909	0.04808	98	52	0.121	0.06889
indel_rNM TSG	135	0.39262	0.39287		3	0.04841	0.01623	132	0.40045	0.39383	37	0.15546	0.06701	98	52	0.48216	0.42661
indel_rNS TSG	135	4.74183	6.56308		3	0.19203	0.08211	132	4.84523	6.60117	37	0.91451	0.4134	98	52	6.18684	7.19331
indel_rSM COSMIC genes	12959	0.35877	0.11108		9019	0.34591	0.06132	3940	0.38822	0.17532	12322	0.34963	0.09405	637	546	0.53554	0.21709
indel_rNM COSMIC genes	12959	0.08107	0.0534		9019	0.07301	0.03397	3940	0.09954	0.07906	12322	0.07742	0.04191	637	546	0.15174	0.13715
indel_rNS COSMIC genes	12958	0.25851	0.21761		9019	0.22103	0.11735	3939	0.34432	0.33717	12322	0.24741	0.17288	636		0.47354	0.581
					PG_SSIr3_1SD			CG_SSIr3_1SD			PG_SSIr3_2SD			CG_SSIr3_2SD
indel_rSMN all COSMIC genes	13930	0.32624	0.11182		9561	0.32078	0.05918	4369	0.33821	0.17887	13107	0.3215	0.09197	823	656	0.40184	0.26631
indel_rMSN all COSMIC genes	13929	2.53571	2.62023		9561	2.45806	0.42567	4368	2.7057	4.63231	13107	2.49787	0.65548	822		3.13914	10.4512
indel_rNSM all COSMIC genes	13930	0.06466	0.06771		9561	0.05559	0.02655	4369	0.08452	0.11181	13107	0.05932	0.03375	823	656	0.14978	0.22762
indel_rSMN CGC genes (without OGs and TSGs)	748	0.26514	0.12653		394	0.3046	0.06149	354	0.22121	0.16123	662	0.26932	0.09453	86	63	0.23291	0.26461
indel_rMSN CGC genes (without OGs and TSGs)	748	2.98057	2.36387		394	2.56531	0.47455	354	3.44275	3.34176	662	2.87899	0.88644	86	63	3.7625	6.5037
indel_rNSM CGC genes (without OGs and TSGs)	748	0.08723	0.13745		394	0.05728	0.0281	354	0.12055	0.19231	662	0.06725	0.03765	86	63	0.24098	0.35774
indel_rSMN OG	88	0.13274	0.10223		10	0.2617	0.06335	78	0.11621	0.09435	51	0.18236	0.0812	37	30	0.06435	0.08833
indel_rMSN OG	88	14.7153	28.8535		10	2.88649	0.48063	78	16.2318	30.3334	51	4.48237	1.46125	37	30	28.8201	40.6959
indel_rNSM OG	88	0.03945	0.03425		10	0.05922	0.02927	78	0.03692	0.03417	51	0.04871	0.0298	37	30	0.02668	0.03623
indel_rSMN TSG	135	0.10347	0.05896		3	0.25099	0.04005	132	0.10012	0.05497	35	0.15692	0.04473	100	53	0.08476	0.05152
indel_rMSN TSG	135	2.5008	1.29114		3	3.22473	0.22362	132	2.48434	1.30084	35	3.2436	0.96261	100	53	2.24081	1.29416
indel_rNSM TSG	135	0.34753	0.34698		3	0.03861	0.01374	132	0.35455	0.34773	35	0.12782	0.05511	100	53	0.42443	0.37266
indel_rSMN COSMIC genes	12959	0.3334	0.10664		9154	0.32156	0.05895	3805	0.3619	0.17097	12359	0.32533	0.09024	600	510	0.49971	0.22129
indel_rMSN COSMIC genes	12958	2.42769	0.64818		9154	2.45272	0.42241	3804	2.36744	0.99843	12359	2.46716	0.6131	599		1.6133	0.79923
indel_rNSM COSMIC genes	12959	0.06059	0.04125		9154	0.05552	0.02648	3805	0.07278	0.06245	12359	0.05874	0.03321	600	510	0.09853	0.11203

## Sheet: Two-Sample t-Tests 1
Two sample t-Tests of passenger genes (PG) and known oncogenes (OG) or known tumor suppressor genes (TSG)
Parameters: fS, fM, fN; rSM, rNM, rNS; rSMN, rMSN and rNSM
fS, fM and fN parameters of PGs and OGs
		N	Mean	SD	SEM	Median
fS_PG1SD		7605	0.24548	0.03079	0.000353046	0.24561							Null Hypothesis: mean1-mean2 = 0
fS_OG		88	0.11148	0.07223	0.0077	0.10552			t Statistic	DF	Prob>|t|		Alternative Hypothesis: mean1-mean2 <> 0
	Difference		0.134		0.00338			Equal Variance Assumed	39.5981	7691	0		At 0.05 level, when equal variance is assumed, Mean1 - Mean2 is significantly different from 0
	Overall	7693	0.24395	0.03463	0.000394808	0.24528		Equal Variance NOT Assumed (Welch Correction)	17.3848	87.3662	4.18393e-30		At 0.05 level, when equal variance is NOT assumed, Mean1 - Mean2 is significantly different from 0
		N	Mean	SD	SEM	Median
fM_PG1SD		7605	0.71084	0.0274	0.000314162	0.71105							Null Hypothesis: mean1-mean2 = 0
fM_OG		88	0.8563	0.08224	0.00877	0.85923			t Statistic	DF	Prob>|t|		Alternative Hypothesis: mean1-mean2 <> 0
	Difference		-0.14546		0.00307			Equal Variance Assumed	-47.4174	7691	0		At 0.05 level, when equal variance is assumed, Mean1 - Mean2 is significantly different from 0
	Overall	7693	0.71251	0.03252	0.000370812	0.71154		Equal Variance NOT Assumed (Welch Correction)	-16.5807	87.2236	1.0615e-28		At 0.05 level, when equal variance is NOT assumed, Mean1 - Mean2 is significantly different from 0
		N	Mean	SD	SEM	Median
fN_PG1SD		7605	0.04368	0.01572	0.000180311	0.04255							Null Hypothesis: mean1-mean2 = 0
fN_OG		88	0.03222	0.02402	0.00256	0.02659			t Statistic	DF	Prob>|t|		Alternative Hypothesis: mean1-mean2 <> 0
	Difference		0.01146		0.0017			Equal Variance Assumed	6.74555	7691	1.63492e-11		At 0.05 level, when equal variance is assumed, Mean1 - Mean2 is significantly different from 0
	Overall	7693	0.04355	0.01589	0.000181147	0.04248		Equal Variance NOT Assumed (Welch Correction)	4.46296	87.8647	2.38733e-05		At 0.05 level, when equal variance is NOT assumed, Mean1 - Mean2 is significantly different from 0
rSM, rNM and rNS parameters of PGs and OGs
		N	Mean	SD	SEM	Median
rSM_PG1SD		9059	0.34523	0.06137	0.000644805	0.34259							Null Hypothesis: mean1-mean2 = 0
rSM_OG		88	0.13971	0.10621	0.01132	0.12666			t Statistic	DF	Prob>|t|		Alternative Hypothesis: mean1-mean2 <> 0
	Difference		0.20552		0.00664			Equal Variance Assumed	30.9697	9145	2.37086e-200		At 0.05 level, when equal variance is assumed, Mean1 - Mean2 is significantly different from 0
	Overall	9147	0.34325	0.06512	0.00068084	0.34211		Equal Variance NOT Assumed (Welch Correction)	18.1231	87.5653	2.23169e-31		At 0.05 level, when equal variance is NOT assumed, Mean1 - Mean2 is significantly different from 0
		N	Mean	SD	SEM	Median
rNM_PG1SD		9059	0.0607	0.02595	0.000272684	0.05839							Null Hypothesis: mean1-mean2 = 0
rNM_OG		88	0.03936	0.0313	0.00334	0.03128			t Statistic	DF	Prob>|t|		Alternative Hypothesis: mean1-mean2 <> 0
	Difference		0.02134		0.00279			Equal Variance Assumed	7.65963	9145	2.05445e-14		At 0.05 level, when equal variance is assumed, Mean1 - Mean2 is significantly different from 0
	Overall	9147	0.06049	0.02609	0.000272812	0.05825		Equal Variance NOT Assumed (Welch Correction)	6.3742	88.1658	8.17532e-09		At 0.05 level, when equal variance is NOT assumed, Mean1 - Mean2 is significantly different from 0
		N	Mean	SD	SEM	Median
rNS_PG1SD		9059	0.18403	0.09138	0.000960121	0.17021							Null Hypothesis: mean1-mean2 = 0
rNS _OG		88	0.36127	0.26399	0.02814	0.29677			t Statistic	DF	Prob>|t|		Alternative Hypothesis: mean1-mean2 <> 0
	Difference		-0.17725		0.01012			Equal Variance Assumed	-17.506	9145	1.61651e-67		At 0.05 level, when equal variance is assumed, Mean1 - Mean2 is significantly different from 0
	Overall	9147	0.18573	0.09609	0.001	0.17073		Equal Variance NOT Assumed (Welch Correction)	-6.29477	87.2027	1.2017e-08		At 0.05 level, when equal variance is NOT assumed, Mean1 - Mean2 is significantly different from 0
rSMN, rMSN and rNSM parameters of PGs and Ogs
		N	Mean	SD	SEM	Median
rSMN_PG1SD		9403	0.3259	0.09265	0.000810938	0.32099							Null Hypothesis: mean1-mean2 = 0
rSMN_OG		88	0.13363	0.10266	0.01094	0.11797			t Statistic	DF	Prob>|t|		Alternative Hypothesis: mean1-mean2 <> 0
	Difference		0.19226		0.00992			Equal Variance Assumed	19.3875	13138	1.39647e-82		At 0.05 level, when equal variance is assumed, Mean1 - Mean2 is significantly different from 0
	Overall	9491	0.32461	0.09403	0.000820285	0.32051		Equal Variance NOT Assumed (Welch Correction)	17.5199	87.958	1.98655e-30		At 0.05 level, when equal variance is NOT assumed, Mean1 - Mean2 is significantly different from 0
		N	Mean	SD	SEM	Median
rMSN_PG1SD		9403	2.58911	0.68355	0.00598	2.46835							Null Hypothesis: mean1-mean2 = 0
rMSN_OG		88	15.3597	30.0747	3.20598	6.10417			t Statistic	DF	Prob>|t|		Alternative Hypothesis: mean1-mean2 <> 0
	Difference		-12.7706		0.27172			Equal Variance Assumed	-46.9991	13138	0		At 0.05 level, when equal variance is assumed, Mean1 - Mean2 is significantly different from 0
	Overall	9491	2.67464	2.74557	0.02395	2.47222		Equal Variance NOT Assumed (Welch Correction)	-3.98337	87.0006	0.000140694		At 0.05 level, when equal variance is NOT assumed, Mean1 - Mean2 is significantly different from 0
		N	Mean	SD	SEM	Median
rNSM_PG1SD		9403	0.04812	0.02561	0.000224208	0.04444							Null Hypothesis: mean1-mean2 = 0
rNSM_OG		88	0.03394	0.02621	0.00279	0.02731			t Statistic	DF	Prob>|t|		Alternative Hypothesis: mean1-mean2 <> 0
	Difference		0.01418		0.00274			Equal Variance Assumed	5.1743	13138	2.32135e-07		At 0.05 level, when equal variance is assumed, Mean1 - Mean2 is significantly different from 0
	Overall	9491	0.04802	0.02564	0.000223709	0.04435		Equal Variance NOT Assumed (Welch Correction)	5.05889	88.1243	2.27937e-06		At 0.05 level, when equal variance is NOT assumed, Mean1 - Mean2 is significantly different from 0
fS, fM and fN parameters of PGs and TSGs
		N	Mean	SD	SEM	Median
fS_PG1SD		7605	0.24548	0.03079	0.000353046	0.24561							Null Hypothesis: mean1-mean2 = 0
fS_TSG		135	0.09532	0.04907	0.00422	0.10037			t Statistic	DF	Prob>|t|		Alternative Hypothesis: mean1-mean2 <> 0
	Difference		0.15016		0.00271			Equal Variance Assumed	55.4378	7738	0		At 0.05 level, when equal variance is assumed, Mean1 - Mean2 is significantly different from 0
	Overall	7740	0.24286	0.03687	0.000419104	0.24503		Equal Variance NOT Assumed (Welch Correction)	35.4352	135.88	1.63759e-70		At 0.05 level, when equal variance is NOT assumed, Mean1 - Mean2 is significantly different from 0
		N	Mean	SD	SEM	Median
fM_PG1SD		7605	0.71084	0.0274	0.000314162	0.71105							Null Hypothesis: mean1-mean2 = 0
fM_TSG		135	0.70828	0.09941	0.00856	0.71127			t Statistic	DF	Prob>|t|		Alternative Hypothesis: mean1-mean2 <> 0
	Difference		0.00256		0.00262			Equal Variance Assumed	0.97751	7738	0.32835		At 0.05 level, when equal variance is assumed, Mean1 - Mean2 is NOT significantly different from 0
	Overall	7740	0.7108	0.03015	0.000342646	0.71106		Equal Variance NOT Assumed (Welch Correction)	0.29884	134.362	0.76552		At 0.05 level, when equal variance is NOT assumed, Mean1 - Mean2 is NOT significantly different from 0
		N	Mean	SD	SEM	Median
fN_PG1SD		7605	0.04368	0.01572	0.000180311	0.04255							Null Hypothesis: mean1-mean2 = 0
fN_TSG		135	0.1964	0.11063	0.00952	0.17544			t Statistic	DF	Prob>|t|		Alternative Hypothesis: mean1-mean2 <> 0
	Difference		-0.15272		0.00185			Equal Variance Assumed	-82.465	7738	0		At 0.05 level, when equal variance is assumed, Mean1 - Mean2 is significantly different from 0
	Overall	7740	0.04634	0.02923	0.000332288	0.04286		Equal Variance NOT Assumed (Welch Correction)	-16.0363	134.096	5.57606e-33		At 0.05 level, when equal variance is NOT assumed, Mean1 - Mean2 is significantly different from 0
rSM, rNM and rNS parameters of PGs and TSGs
		N	Mean	SD	SEM	Median
rSM_PG1SD		9059	0.34523	0.06137	0.000644805	0.34259							Null Hypothesis: mean1-mean2 = 0
rSM_TSG		135	0.13693	0.06879	0.00592	0.13939			t Statistic	DF	Prob>|t|		Alternative Hypothesis: mean1-mean2 <> 0
	Difference		0.2083		0.00533			Equal Variance Assumed	39.0716	9192	0		At 0.05 level, when equal variance is assumed, Mean1 - Mean2 is significantly different from 0
	Overall	9194	0.34217	0.06639	0.000692415	0.34146		Equal Variance NOT Assumed (Welch Correction)	34.9751	137.197	3.21859e-70		At 0.05 level, when equal variance is NOT assumed, Mean1 - Mean2 is significantly different from 0
		N	Mean	SD	SEM	Median
rNM_PG1SD		9059	0.0607	0.02595	0.000272684	0.05839							Null Hypothesis: mean1-mean2 = 0
rNM_TSG		135	0.31524	0.31575	0.02718	0.25157			t Statistic	DF	Prob>|t|		Alternative Hypothesis: mean1-mean2 <> 0
	Difference		-0.25454		0.00399			Equal Variance Assumed	-63.8032	9192	0		At 0.05 level, when equal variance is assumed, Mean1 - Mean2 is significantly different from 0
	Overall	9194	0.06443	0.05527	0.000576384	0.05882		Equal Variance NOT Assumed (Welch Correction)	-9.3663	134.027	2.39672e-16		At 0.05 level, when equal variance is NOT assumed, Mean1 - Mean2 is significantly different from 0
		N	Mean	SD	SEM	Median
rNS_PG1SD		9059	0.18403	0.09138	0.000960121	0.17021							Null Hypothesis: mean1-mean2 = 0
rNS_TSG		135	3.92588	5.66261	0.48736	2.13953			t Statistic	DF	Prob>|t|		Alternative Hypothesis: mean1-mean2 <> 0
	Difference		-3.74185		0.0598			Equal Variance Assumed	-62.5731	9192	0		At 0.05 level, when equal variance is assumed, Mean1 - Mean2 is significantly different from 0
	Overall	9194	0.23897	0.82354	0.00859	0.17188		Equal Variance NOT Assumed (Welch Correction)	-7.67778	134.001	3.01672e-12		At 0.05 level, when equal variance is NOT assumed, Mean1 - Mean2 is significantly different from 0
rSMN, rMSN and rNSM parameters of PGs and TSGs
		N	Mean	SD	SEM	Median
rSMN_PG1SD		9403	0.3259	0.09265	0.000810938	0.32099							Null Hypothesis: mean1-mean2 = 0
rSMN_TSG		135	0.10865	0.06128	0.00527	0.11157			t Statistic	DF	Prob>|t|		Alternative Hypothesis: mean1-mean2 <> 0
	Difference		0.21724		0.00799			Equal Variance Assumed	27.183	13185	2.29011e-158		At 0.05 level, when equal variance is assumed, Mean1 - Mean2 is significantly different from 0
	Overall	9538	0.32367	0.09493	0.00082667	0.32		Equal Variance NOT Assumed (Welch Correction)	40.7111	140.41	1.27024e-79		At 0.05 level, when equal variance is NOT assumed, Mean1 - Mean2 is significantly different from 0
		N	Mean	SD	SEM	Median
rMSN_PG1SD		9403	2.58911	0.68355	0.00598	2.46835							Null Hypothesis: mean1-mean2 = 0
rMSN_TSG		135	2.82486	1.32924	0.1144	2.46341			t Statistic	DF	Prob>|t|		Alternative Hypothesis: mean1-mean2 <> 0
	Difference		-0.23575		0.05996			Equal Variance Assumed	-3.93153	13185	8.48385e-05		At 0.05 level, when equal variance is assumed, Mean1 - Mean2 is significantly different from 0
	Overall	9538	2.59152	0.69352	0.00604	2.46809		Equal Variance NOT Assumed (Welch Correction)	-2.0579	134.734	0.04153		At 0.05 level, when equal variance is NOT assumed, Mean1 - Mean2 is significantly different from 0
		N	Mean	SD	SEM	Median
rNSM_PG1SD		9403	0.04812	0.02561	0.000224208	0.04444							Null Hypothesis: mean1-mean2 = 0
rNSM_TSG		135	0.27937	0.2783	0.02395	0.21277			t Statistic	DF	Prob>|t|		Alternative Hypothesis: mean1-mean2 <> 0
	Difference		-0.23125		0.00328			Equal Variance Assumed	-70.5263	13185	0		At 0.05 level, when equal variance is assumed, Mean1 - Mean2 is significantly different from 0
	Overall	9538	0.05048	0.04448	0.000387333	0.0447		Equal Variance NOT Assumed (Welch Correction)	-9.65417	134.023	4.59475e-17		At 0.05 level, when equal variance is NOT assumed, Mean1 - Mean2 is significantly different from 0
fS, fM and fN parameters of PGs and TSGs
		N	Mean	SD	SEM	Median
indel_fS_PG1SD		7791	0.24323	0.03082	0.000349117	0.24365							Null Hypothesis: mean1-mean2 = 0
fS_TSG		135	0.09532	0.04907	0.00422	0.10037			t Statistic	DF	Prob>|t|		Alternative Hypothesis: mean1-mean2 <> 0
	Difference		0.14791		0.00271			Equal Variance Assumed	54.5878	7924	0		At 0.05 level, when equal variance is assumed, Mean1 - Mean2 is significantly different from 0
	Overall	7926	0.24071	0.03661	0.00041124	0.24277		Equal Variance NOT Assumed (Welch Correction)	34.9065	135.838	1.06418e-69		At 0.05 level, when equal variance is NOT assumed, Mean1 - Mean2 is significantly different from 0
		N	Mean	SD	SEM	Median
indel_fM_PG1SD		7791	0.70443	0.02766	0.000313408	0.70504							Null Hypothesis: mean1-mean2 = 0
fM_TSG		135	0.70828	0.09941	0.00856	0.71127			t Statistic	DF	Prob>|t|		Alternative Hypothesis: mean1-mean2 <> 0
	Difference		-0.00386		0.00263			Equal Variance Assumed	-1.46474	7924	0.14303		At 0.05 level, when equal variance is assumed, Mean1 - Mean2 is NOT significantly different from 0
	Overall	7926	0.70449	0.03032	0.000340616	0.70509		Equal Variance NOT Assumed (Welch Correction)	-0.45034	134.36	0.65319		At 0.05 level, when equal variance is NOT assumed, Mean1 - Mean2 is NOT significantly different from 0
		N	Mean	SD	SEM	Median
indel_fN_PG1SD		7791	0.05235	0.01954	0.000221364	0.05031							Null Hypothesis: mean1-mean2 = 0
fN_TSG		135	0.1964	0.11063	0.00952	0.17544			t Statistic	DF	Prob>|t|		Alternative Hypothesis: mean1-mean2 <> 0
	Difference		-0.14405		0.00209			Equal Variance Assumed	-68.768	7924	0		At 0.05 level, when equal variance is assumed, Mean1 - Mean2 is significantly different from 0
	Overall	7926	0.0548	0.03049	0.000342485	0.05072		Equal Variance NOT Assumed (Welch Correction)	-15.1249	134.145	8.8201e-31		At 0.05 level, when equal variance is NOT assumed, Mean1 - Mean2 is significantly different from 0
rSM, rNM and rNS parameters of PGs and TSGs
		N	Mean	SD	SEM	Median
indel_rSM_PG1SD		9412	0.34507	0.0615	0.000633948	0.34247							Null Hypothesis: mean1-mean2 = 0
rSM_TSG		135	0.13693	0.06879	0.00592	0.13939			t Statistic	DF	Prob>|t|		Alternative Hypothesis: mean1-mean2 <> 0
	Difference		0.20814		0.00534			Equal Variance Assumed	38.9733	9545	0		At 0.05 level, when equal variance is assumed, Mean1 - Mean2 is significantly different from 0
	Overall	9547	0.34212	0.06633	0.000678842	0.34146		Equal Variance NOT Assumed (Welch Correction)	34.9551	137.09	3.72383e-70		At 0.05 level, when equal variance is NOT assumed, Mean1 - Mean2 is significantly different from 0
		N	Mean	SD	SEM	Median
indel_rNM_PG1SD		9412	0.07309	0.03403	0.000350788	0.06897							Null Hypothesis: mean1-mean2 = 0
rNM_TSG		135	0.31524	0.31575	0.02718	0.25157			t Statistic	DF	Prob>|t|		Alternative Hypothesis: mean1-mean2 <> 0
	Difference		-0.24215		0.00437			Equal Variance Assumed	-55.412	9545	0		At 0.05 level, when equal variance is assumed, Mean1 - Mean2 is significantly different from 0
	Overall	9547	0.07652	0.05795	0.000593136	0.06944		Equal Variance NOT Assumed (Welch Correction)	-8.9098	134.045	3.22279e-15		At 0.05 level, when equal variance is NOT assumed, Mean1 - Mean2 is significantly different from 0
		N	Mean	SD	SEM	Median
indel_rNS_PG1SD		9412	0.22193	0.1179	0.00122	0.2							Null Hypothesis: mean1-mean2 = 0
rNS_TSG		135	3.92588	5.66261	0.48736	2.13953			t Statistic	DF	Prob>|t|		Alternative Hypothesis: mean1-mean2 <> 0
	Difference		-3.70395		0.05904			Equal Variance Assumed	-62.7402	9545	0		At 0.05 level, when equal variance is assumed, Mean1 - Mean2 is significantly different from 0
	Overall	9547	0.27431	0.80937	0.00828	0.20325		Equal Variance NOT Assumed (Welch Correction)	-7.6	134.002	4.5945e-12		At 0.05 level, when equal variance is NOT assumed, Mean1 - Mean2 is significantly different from 0
rSMN, rMSN and rNSM parameters of PGs and TSGs
		N	Mean	SD	SEM	Median
indel_rSMN_PG1SD		9561	0.32078	0.05918	0.00060528	0.31884							Null Hypothesis: mean1-mean2 = 0
rSMN_TSG		135	0.10865	0.06128	0.00527	0.11157			t Statistic	DF	Prob>|t|		Alternative Hypothesis: mean1-mean2 <> 0
	Difference		0.21212		0.00513			Equal Variance Assumed	41.3319	9694	0		At 0.05 level, when equal variance is assumed, Mean1 - Mean2 is significantly different from 0
	Overall	9696	0.31782	0.06422	0.000652155	0.31746		Equal Variance NOT Assumed (Welch Correction)	39.9564	137.553	1.42754e-77		At 0.05 level, when equal variance is NOT assumed, Mean1 - Mean2 is significantly different from 0
		N	Mean	SD	SEM	Median
indel_rMSN_PG1SD		9561	2.45806	0.42567	0.00435	2.40909							Null Hypothesis: mean1-mean2 = 0
rMSN_TSG		135	2.82486	1.32924	0.1144	2.46341			t Statistic	DF	Prob>|t|		Alternative Hypothesis: mean1-mean2 <> 0
	Difference		-0.3668		0.03906			Equal Variance Assumed	-9.39045	9694	7.32553e-21		At 0.05 level, when equal variance is assumed, Mean1 - Mean2 is significantly different from 0
	Overall	9696	2.46316	0.4527	0.0046	2.40909		Equal Variance NOT Assumed (Welch Correction)	-3.20394	134.388	0.00169		At 0.05 level, when equal variance is NOT assumed, Mean1 - Mean2 is significantly different from 0
		N	Mean	SD	SEM	Median
indel_rNSM_PG1SD		9561	0.05559	0.02655	0.000271507	0.05208							Null Hypothesis: mean1-mean2 = 0
rNSM_TSG		135	0.27937	0.2783	0.02395	0.21277			t Statistic	DF	Prob>|t|		Alternative Hypothesis: mean1-mean2 <> 0
	Difference		-0.22378		0.00364			Equal Variance Assumed	-61.4441	9694	0		At 0.05 level, when equal variance is assumed, Mean1 - Mean2 is significantly different from 0
	Overall	9696	0.05871	0.04953	0.000502993	0.05239		Equal Variance NOT Assumed (Welch Correction)	-9.34189	134.034	2.75488e-16		At 0.05 level, when equal variance is NOT assumed, Mean1 - Mean2 is significantly different from 0

## Sheet: Two-Sample t-Tests 2
Two sample t-Tests of passenger genes (PG) and candidate oncogenes (OG), candidate tumor suppressor genes (TSG), candidate tumor essential genes (TEG)
Parameters: fS, fM, fN; rSM, rNM, rNS; rSMN, rMSN and rNSM
fS, fM and fN parameters of PGs and candidate OGs
		N	Mean	SD	SEM	Median
fS_PG1SD		7605	0.24548	0.03079	0.000353046	0.24561							Null Hypothesis: mean1-mean2 = 0
fS_CG_SO2SD_rMSN>3.00		440	0.11383	0.04122	0.00197	0.11765			t Statistic	DF	Prob>|t|		Alternative Hypothesis: mean1-mean2 <> 0
	Difference		0.13165		0.00154			Equal Variance Assumed	85.3823	8043	0		At 0.05 level, when equal variance is assumed, Mean1 - Mean2 is significantly different from 0
	Overall	8045	0.23828	0.04342	0.000484052	0.24306		Equal Variance NOT Assumed (Welch Correction)	65.9413	467.77	5.54325e-239		At 0.05 level, when equal variance is NOT assumed, Mean1 - Mean2 is significantly different from 0
		N	Mean	SD	SEM	Median
fM_PG1SD		7605	0.71084	0.0274	0.000314162	0.71105							Null Hypothesis: mean1-mean2 = 0
fM_CG_SO2SD_rMSN>3.00		440	0.83095	0.04637	0.00221	0.825			t Statistic	DF	Prob>|t|		Alternative Hypothesis: mean1-mean2 <> 0
	Difference		-0.12011		0.00141			Equal Variance Assumed	-85.1789	8043	0		At 0.05 level, when equal variance is assumed, Mean1 - Mean2 is significantly different from 0
	Overall	8045	0.71741	0.03966	0.000442161	0.71373		Equal Variance NOT Assumed (Welch Correction)	-53.787	456.897	8.82303e-200		At 0.05 level, when equal variance is NOT assumed, Mean1 - Mean2 is significantly different from 0
		N	Mean	SD	SEM	Median
fN_PG1SD		7605	0.04368	0.01572	0.000180311	0.04255							Null Hypothesis: mean1-mean2 = 0
fN_CG_SO2SD_rMSN>3.00		440	0.05522	0.04065	0.00194	0.04401			t Statistic	DF	Prob>|t|		Alternative Hypothesis: mean1-mean2 <> 0
	Difference		-0.01154		0.000882515			Equal Variance Assumed	-13.0806	8043	1.05326e-38		At 0.05 level, when equal variance is assumed, Mean1 - Mean2 is significantly different from 0
	Overall	8045	0.04431	0.01819	0.000202776	0.04261		Equal Variance NOT Assumed (Welch Correction)	-5.93148	446.633	6.02131e-09		At 0.05 level, when equal variance is NOT assumed, Mean1 - Mean2 is significantly different from 0
rSM, rNM and rNS parameters of PGs and candidate OGs
		N	Mean	SD	SEM	Median
rSM_PG1SD		9059	0.34523	0.06137	0.000644805	0.34259							Null Hypothesis: mean1-mean2 = 0
rSM_CG_SO2SD_rMSN>3.00		440	0.13886	0.05317	0.00253	0.14286			t Statistic	DF	Prob>|t|		Alternative Hypothesis: mean1-mean2 <> 0
	Difference		0.20636		0.00298			Equal Variance Assumed	69.2798	9497	0		At 0.05 level, when equal variance is assumed, Mean1 - Mean2 is significantly different from 0
	Overall	9499	0.33567	0.07486	0.000768094	0.33858		Equal Variance NOT Assumed (Welch Correction)	78.8935	497.543	1.97756e-283		At 0.05 level, when equal variance is NOT assumed, Mean1 - Mean2 is significantly different from 0
		N	Mean	SD	SEM	Median
rNM_PG1SD		9059	0.0607	0.02595	0.000272684	0.05839							Null Hypothesis: mean1-mean2 = 0
rNM_CG_SO2SD_rMSN>3.00		440	0.06815	0.05207	0.00248	0.05283			t Statistic	DF	Prob>|t|		Alternative Hypothesis: mean1-mean2 <> 0
	Difference		-0.00746		0.00135			Equal Variance Assumed	-5.5114	9497	3.65308e-08		At 0.05 level, when equal variance is assumed, Mean1 - Mean2 is significantly different from 0
	Overall	9499	0.06104	0.02775	0.00028474	0.05825		Equal Variance NOT Assumed (Welch Correction)	-2.98546	449.657	0.00299		At 0.05 level, when equal variance is NOT assumed, Mean1 - Mean2 is significantly different from 0
		N	Mean	SD	SEM	Median
rNS_PG1SD		9059	0.18403	0.09138	0.000960121	0.17021							Null Hypothesis: mean1-mean2 = 0
rNS_CG_SO2SD_rMSN>3.00		439	0.96346	3.12488	0.14914	0.38462			t Statistic	DF	Prob>|t|		Alternative Hypothesis: mean1-mean2 <> 0
	Difference		-0.77944		0.03309			Equal Variance Assumed	-23.5575	9496	2.65299e-119		At 0.05 level, when equal variance is assumed, Mean1 - Mean2 is significantly different from 0
	Overall	9498	0.22005	0.69649	0.00715	0.17391		Equal Variance NOT Assumed (Welch Correction)	-5.22601	438.036	2.68562e-07		At 0.05 level, when equal variance is NOT assumed, Mean1 - Mean2 is significantly different from 0
rSMN, rMSN and rNSM parameters of PGs and candidate OGs
		N	Mean	SD	SEM	Median
rSMN_PG1SD		9403	0.32572	0.05962	0.00061485	0.32394							Null Hypothesis: mean1-mean2 = 0
rSMN_CG_SO2SD_rMSN>3.00		440	0.13083	0.05154	0.00246	0.13333			t Statistic	DF	Prob>|t|		Alternative Hypothesis: mean1-mean2 <> 0
	Difference		0.19488		0.00289			Equal Variance Assumed	67.3957	9841	0		At 0.05 level, when equal variance is assumed, Mean1 - Mean2 is significantly different from 0
	Overall	9843	0.317	0.07167	0.000722374	0.31959		Equal Variance NOT Assumed (Welch Correction)	76.9466	495.615	9.40172e-278		At 0.05 level, when equal variance is NOT assumed, Mean1 - Mean2 is significantly different from 0
		N	Mean	SD	SEM	Median
rMSN_PG1SD		9403	2.52734	0.42422	0.00437	2.47619							Null Hypothesis: mean1-mean2 = 0
rMSN_CG_SO2SD_rMSN>3.00		440	7.09907	14.2819	0.68086	4.71429			t Statistic	DF	Prob>|t|		Alternative Hypothesis: mean1-mean2 <> 0
	Difference		-4.57172		0.14851			Equal Variance Assumed	-30.783	9841	9.52966e-199		At 0.05 level, when equal variance is assumed, Mean1 - Mean2 is significantly different from 0
	Overall	9843	2.73171	3.18791	0.03213	2.5		Equal Variance NOT Assumed (Welch Correction)	-6.71445	439.036	5.85683e-11		At 0.05 level, when equal variance is NOT assumed, Mean1 - Mean2 is significantly different from 0
		N	Mean	SD	SEM	Median
rNSM_PG1SD		9403	0.04568	0.02083	0.000214777	0.04367							Null Hypothesis: mean1-mean2 = 0
rNSM_CG_SO2SD_rMSN>3.00		440	0.06052	0.04821	0.0023	0.04603			t Statistic	DF	Prob>|t|		Alternative Hypothesis: mean1-mean2 <> 0
	Difference		-0.01484		0.00111			Equal Variance Assumed	-13.3627	9841	2.24384e-40		At 0.05 level, when equal variance is assumed, Mean1 - Mean2 is significantly different from 0
	Overall	9843	0.04634	0.02297	0.000231482	0.04372		Equal Variance NOT Assumed (Welch Correction)	-6.42695	446.7	3.34472e-10		At 0.05 level, when equal variance is NOT assumed, Mean1 - Mean2 is significantly different from 0
fS, fM and fN parameters of PGs and candidate TSGs
		N	Mean	SD	SEM	Median
indel_fS_PG1SD		7791	0.24323	0.03082	0.000349117	0.24365							Null Hypothesis: mean1-mean2 = 0
indel_fS_CG_SSI2SD_rNSM> 0.125		624	0.16073	0.06733	0.0027	0.16177			t Statistic	DF	Prob>|t|		Alternative Hypothesis: mean1-mean2 <> 0
	Difference		0.08249		0.00145			Equal Variance Assumed	56.8855	8413	0		At 0.05 level, when equal variance is assumed, Mean1 - Mean2 is significantly different from 0
	Overall	8415	0.23711	0.04101	0.000447093	0.24057		Equal Variance NOT Assumed (Welch Correction)	30.3526	644.065	2.5735e-126		At 0.05 level, when equal variance is NOT assumed, Mean1 - Mean2 is significantly different from 0
		N	Mean	SD	SEM	Median
indel_fM_PG1SD		7791	0.70443	0.02766	0.000313408	0.70504							Null Hypothesis: mean1-mean2 = 0
indel_fM_CG_SSI2SD_rNSM> 0.125		624	0.65146	0.0776	0.00311	0.65349			t Statistic	DF	Prob>|t|		Alternative Hypothesis: mean1-mean2 <> 0
	Difference		0.05296		0.00141			Equal Variance Assumed	37.4671	8413	2.81261e-284		At 0.05 level, when equal variance is assumed, Mean1 - Mean2 is significantly different from 0
	Overall	8415	0.7005	0.0367	0.000400086	0.70323		Equal Variance NOT Assumed (Welch Correction)	16.9639	635.742	1.60285e-53		At 0.05 level, when equal variance is NOT assumed, Mean1 - Mean2 is significantly different from 0
		N	Mean	SD	SEM	Median
indel_fN_PG1SD		7791	0.05235	0.01954	0.000221364	0.05031							Null Hypothesis: mean1-mean2 = 0
indel_fN_CG_SSI2SD_rNSM> 0.125		624	0.1878	0.07896	0.00316	0.16272			t Statistic	DF	Prob>|t|		Alternative Hypothesis: mean1-mean2 <> 0
	Difference		-0.13546		0.00119			Equal Variance Assumed	-114.032	8413	0		At 0.05 level, when equal variance is assumed, Mean1 - Mean2 is significantly different from 0
	Overall	8415	0.06239	0.04555	0.000496575	0.05263		Equal Variance NOT Assumed (Welch Correction)	-42.7477	629.124	3.00703e-188		At 0.05 level, when equal variance is NOT assumed, Mean1 - Mean2 is significantly different from 0
rSM, rNM and rNS parameters of PGs and candidate TSGs
		N	Mean	SD	SEM	Median
indel_rSM_PG1SD		9412	0.34507	0.0615	0.000633948	0.34247							Null Hypothesis: mean1-mean2 = 0
indel_rSM_CG_SSI2SD_rNSM> 0.125		624	0.25486	0.12482	0.005	0.25			t Statistic	DF	Prob>|t|		Alternative Hypothesis: mean1-mean2 <> 0
	Difference		0.09021		0.00278			Equal Variance Assumed	32.4756	10034	4.44607e-220		At 0.05 level, when equal variance is assumed, Mean1 - Mean2 is significantly different from 0
	Overall	10036	0.33946	0.07063	0.00070507	0.33942		Equal Variance NOT Assumed (Welch Correction)	17.9094	643.207	1.68934e-58		At 0.05 level, when equal variance is NOT assumed, Mean1 - Mean2 is significantly different from 0
		N	Mean	SD	SEM	Median
indel_rNM_PG1SD		9412	0.07309	0.03403	0.000350788	0.06897							Null Hypothesis: mean1-mean2 = 0
indel_rNM_CG_SSI2SD_rNSM> 0.125		624	0.30798	0.24175	0.00968	0.24902			t Statistic	DF	Prob>|t|		Alternative Hypothesis: mean1-mean2 <> 0
	Difference		-0.23489		0.00284			Equal Variance Assumed	-82.7523	10034	0		At 0.05 level, when equal variance is assumed, Mean1 - Mean2 is significantly different from 0
	Overall	10036	0.0877	0.08906	0.000889018	0.07175		Equal Variance NOT Assumed (Welch Correction)	-24.2552	624.638	4.41734e-92		At 0.05 level, when equal variance is NOT assumed, Mean1 - Mean2 is significantly different from 0
		N	Mean	SD	SEM	Median
indel_rNS_PG1SD		9412	0.22193	0.1179	0.00122	0.2							Null Hypothesis: mean1-mean2 = 0
indel_rNS_CG_SSI2SD_rNSM> 0.125		624	2.06269	4.9639	0.19872	1.06667			t Statistic	DF	Prob>|t|		Alternative Hypothesis: mean1-mean2 <> 0
	Difference		-1.84076		0.05135			Equal Variance Assumed	-35.849	10034	6.08861e-265		At 0.05 level, when equal variance is assumed, Mean1 - Mean2 is significantly different from 0
	Overall	10036	0.33638	1.31923	0.01317	0.21165		Equal Variance NOT Assumed (Welch Correction)	-9.26314	623.047	3.17575e-19		At 0.05 level, when equal variance is NOT assumed, Mean1 - Mean2 is significantly different from 0
rSMN, rMSN and rNSM parameters of PGs and candidate TSGs
		N	Mean	SD	SEM	Median
indel_rSMN_PG1SD		9561	0.32078	0.05918	0.00060528	0.31884							Null Hypothesis: mean1-mean2 = 0
indel_rSMN_CG_SSI2SD_rNSM> 0.125		624	0.19955	0.10143	0.00406	0.193			t Statistic	DF	Prob>|t|		Alternative Hypothesis: mean1-mean2 <> 0
	Difference		0.12122		0.00259			Equal Variance Assumed	46.872	10183	0		At 0.05 level, when equal variance is assumed, Mean1 - Mean2 is significantly different from 0
	Overall	10185	0.31335	0.06901	0.000683832	0.31447		Equal Variance NOT Assumed (Welch Correction)	29.5276	650.974	3.02088e-122		At 0.05 level, when equal variance is NOT assumed, Mean1 - Mean2 is significantly different from 0
		N	Mean	SD	SEM	Median
indel_rMSN_PG1SD		9561	2.45806	0.42567	0.00435	2.40909							Null Hypothesis: mean1-mean2 = 0
indel_rMSN_CG_SSI2SD_rNSM> 0.125		624	2.01808	0.72765	0.02913	1.8859			t Statistic	DF	Prob>|t|		Alternative Hypothesis: mean1-mean2 <> 0
	Difference		0.43997		0.01859			Equal Variance Assumed	23.6633	10183	1.48737e-120		At 0.05 level, when equal variance is assumed, Mean1 - Mean2 is significantly different from 0
	Overall	10185	2.4311	0.46219	0.00458	2.38788		Equal Variance NOT Assumed (Welch Correction)	14.9383	651.119	1.32552e-43		At 0.05 level, when equal variance is NOT assumed, Mean1 - Mean2 is significantly different from 0
		N	Mean	SD	SEM	Median
indel_rNSM_PG1SD		9561	0.05559	0.02655	0.000271507	0.05208							Null Hypothesis: mean1-mean2 = 0
indel_rNSM_CG_SSI2SD_rNSM> 0.125		624	0.25046	0.21763	0.00871	0.19434			t Statistic	DF	Prob>|t|		Alternative Hypothesis: mean1-mean2 <> 0
	Difference		-0.19487		0.00247			Equal Variance Assumed	-79.0543	10183	0		At 0.05 level, when equal variance is assumed, Mean1 - Mean2 is significantly different from 0
	Overall	10185	0.06753	0.07578	0.000750924	0.05422		Equal Variance NOT Assumed (Welch Correction)	-22.3569	624.211	8.94732e-82		At 0.05 level, when equal variance is NOT assumed, Mean1 - Mean2 is significantly different from 0
fS, fM and fN parameters of PGs and candidate TEGs
		N	Mean	SD	SEM	Median
fS_PG1SD		7605	0.24548	0.03079	0.000353046	0.24561							Null Hypothesis: mean1-mean2 = 0
fS_CG_SO2SD_rSMN>0.5		505	0.38287	0.03531	0.00157	0.37288			t Statistic	DF	Prob>|t|		Alternative Hypothesis: mean1-mean2 <> 0
	Difference		-0.13739		0.00143			Equal Variance Assumed	-96.1707	8108	0		At 0.05 level, when equal variance is assumed, Mean1 - Mean2 is significantly different from 0
	Overall	8110	0.25403	0.04548	0.000505054	0.24897		Equal Variance NOT Assumed (Welch Correction)	-85.3094	556.076	0		At 0.05 level, when equal variance is NOT assumed, Mean1 - Mean2 is significantly different from 0
		N	Mean	SD	SEM	Median
fM_PG1SD		7605	0.71084	0.0274	0.000314162	0.71105							Null Hypothesis: mean1-mean2 = 0
fM_CG_SO2SD_rSMN>0.5		505	0.58619	0.03669	0.00163	0.59155			t Statistic	DF	Prob>|t|		Alternative Hypothesis: mean1-mean2 <> 0
	Difference		0.12465		0.00129			Equal Variance Assumed	96.6537	8108	0		At 0.05 level, when equal variance is assumed, Mean1 - Mean2 is significantly different from 0
	Overall	8110	0.70308	0.04117	0.000457148	0.70838		Equal Variance NOT Assumed (Welch Correction)	74.9756	541.969	2.74506e-288		At 0.05 level, when equal variance is NOT assumed, Mean1 - Mean2 is significantly different from 0
		N	Mean	SD	SEM	Median
fN_PG1SD		7605	0.04368	0.01572	0.000180311	0.04255							Null Hypothesis: mean1-mean2 = 0
fN_CG_SO2SD_rSMN>0.5		505	0.03094	0.02049	0.000911597	0.02752			t Statistic	DF	Prob>|t|		Alternative Hypothesis: mean1-mean2 <> 0
	Difference		0.01274		0.000738077			Equal Variance Assumed	17.2626	8108	1.3265e-65		At 0.05 level, when equal variance is assumed, Mean1 - Mean2 is significantly different from 0
	Overall	8110	0.04289	0.01635	0.000181588	0.04172		Equal Variance NOT Assumed (Welch Correction)	13.7111	544.153	5.78743e-37		At 0.05 level, when equal variance is NOT assumed, Mean1 - Mean2 is significantly different from 0
rSM, rNM and rNS parameters of PGs and candidate TEGs
		N	Mean	SD	SEM	Median
rSM_PG1SD		9059	0.34523	0.06137	0.000644805	0.34259							Null Hypothesis: mean1-mean2 = 0
rSM_CG_SO2SD_rSMN>0.5		505	0.6601	0.12069	0.00537	0.63014			t Statistic	DF	Prob>|t|		Alternative Hypothesis: mean1-mean2 <> 0
	Difference		-0.31487		0.00301			Equal Variance Assumed	-104.585	9562	0		At 0.05 level, when equal variance is assumed, Mean1 - Mean2 is significantly different from 0
	Overall	9564	0.36185	0.09641	0.00098581	0.34817		Equal Variance NOT Assumed (Welch Correction)	-58.2086	518.628	1.45871e-229		At 0.05 level, when equal variance is NOT assumed, Mean1 - Mean2 is significantly different from 0
		N	Mean	SD	SEM	Median
rNM_PG1SD		9059	0.0607	0.02595	0.000272684	0.05839							Null Hypothesis: mean1-mean2 = 0
rNM_CG_SO2SD_rSMN>0.5		505	0.05376	0.03686	0.00164	0.04688			t Statistic	DF	Prob>|t|		Alternative Hypothesis: mean1-mean2 <> 0
	Difference		0.00694		0.00122			Equal Variance Assumed	5.69739	9562	1.25253e-08		At 0.05 level, when equal variance is assumed, Mean1 - Mean2 is significantly different from 0
	Overall	9564	0.06033	0.02668	0.000272855	0.05811		Equal Variance NOT Assumed (Welch Correction)	4.17369	532.221	3.50058e-05		At 0.05 level, when equal variance is NOT assumed, Mean1 - Mean2 is significantly different from 0
		N	Mean	SD	SEM	Median
rNS_PG1SD		9059	0.18403	0.09138	0.000960121	0.17021							Null Hypothesis: mean1-mean2 = 0
rNS_CG_SO2SD_rSMN>0.5		505	0.08245	0.05706	0.00254	0.07143			t Statistic	DF	Prob>|t|		Alternative Hypothesis: mean1-mean2 <> 0
	Difference		0.10158		0.00411			Equal Variance Assumed	24.7117	9562	9.52422e-131		At 0.05 level, when equal variance is assumed, Mean1 - Mean2 is significantly different from 0
	Overall	9564	0.17866	0.09272	0.000948132	0.16522		Equal Variance NOT Assumed (Welch Correction)	37.42	657.684	4.60173e-165		At 0.05 level, when equal variance is NOT assumed, Mean1 - Mean2 is significantly different from 0
rSMN, rMSN and rNSM parameters of PGs and candidate TEGs
		N	Mean	SD	SEM	Median
rSMN_PG1SD		9403	0.32572	0.05962	0.00061485	0.32394							Null Hypothesis: mean1-mean2 = 0
rSMN_CG_SO2SD_rSMN>0.5		505	0.62685	0.11453	0.0051	0.59459			t Statistic	DF	Prob>|t|		Alternative Hypothesis: mean1-mean2 <> 0
	Difference		-0.30113		0.0029			Equal Variance Assumed	-103.701	9906	0		At 0.05 level, when equal variance is assumed, Mean1 - Mean2 is significantly different from 0
	Overall	9908	0.34106	0.0918	0.000922265	0.32927		Equal Variance NOT Assumed (Welch Correction)	-58.6611	518.772	4.0972e-231		At 0.05 level, when equal variance is NOT assumed, Mean1 - Mean2 is significantly different from 0
		N	Mean	SD	SEM	Median
rMSN_PG1SD		9403	2.52734	0.42422	0.00437	2.47619							Null Hypothesis: mean1-mean2 = 0
rMSN_CG_SO2SD_rSMN>0.5		505	1.43315	0.18974	0.00844	1.44828			t Statistic	DF	Prob>|t|		Alternative Hypothesis: mean1-mean2 <> 0
	Difference		1.09419		0.01898			Equal Variance Assumed	57.6516	9906	0		At 0.05 level, when equal variance is assumed, Mean1 - Mean2 is significantly different from 0
	Overall	9908	2.47157	0.48014	0.00482	2.44693		Equal Variance NOT Assumed (Welch Correction)	115.063	807.805	0		At 0.05 level, when equal variance is NOT assumed, Mean1 - Mean2 is significantly different from 0
		N	Mean	SD	SEM	Median
rNSM_PG1SD		9403	0.04568	0.02083	0.000214777	0.04367							Null Hypothesis: mean1-mean2 = 0
rNSM_CG_SO2SD_rSMN>0.5		505	0.03239	0.02221	0.000988126	0.0283			t Statistic	DF	Prob>|t|		Alternative Hypothesis: mean1-mean2 <> 0
	Difference		0.01329		0.000954641			Equal Variance Assumed	13.9184	9906	1.25941e-43		At 0.05 level, when equal variance is assumed, Mean1 - Mean2 is significantly different from 0
	Overall	9908	0.045	0.0211	0.000211991	0.04296		Equal Variance NOT Assumed (Welch Correction)	13.1399	552.681	1.63365e-34		At 0.05 level, when equal variance is NOT assumed, Mean1 - Mean2 is significantly different from 0

## Sheet: Two-Sample t-Tests 3
Two sample t-Tests of passenger genes (PG), novel oncogenes (OG), novel tumor suppressor genes (TSG) and tumor essential genes (TEG)
Parameters: fS, fM, fN; rSM, rNM, rNS; rSMN, rMSN and rNSM
fS, fM and fN parameters of PGs and novel OGs
		N	Mean	SD	SEM	Median
fS_PG1SD		7605	0.24548	0.03079	0.000353046	0.24561							Null Hypothesis: mean1-mean2 = 0
fS_novel OG		7	0.09636	0.00957	0.00362	0.09174			t Statistic	DF	Prob>|t|		Alternative Hypothesis: mean1-mean2 <> 0
	Difference		0.14912		0.01164			Equal Variance Assumed	12.8129	7610	3.3606e-37		At 0.05 level, when equal variance is assumed, Mean1 - Mean2 is significantly different from 0
	Overall	7612	0.24534	0.03111	0.000356519	0.24561		Equal Variance NOT Assumed (Welch Correction)	41.0497	6.11497	1.06143e-08		At 0.05 level, when equal variance is NOT assumed, Mean1 - Mean2 is significantly different from 0
		N	Mean	SD	SEM	Median
fM_PG1SD		7605	0.71084	0.0274	0.000314162	0.71105							Null Hypothesis: mean1-mean2 = 0
fM_novel OG		7	0.8275	0.03701	0.01399	0.82286			t Statistic	DF	Prob>|t|		Alternative Hypothesis: mean1-mean2 <> 0
	Difference		-0.11666		0.01036			Equal Variance Assumed	-11.2569	7610	3.63772e-29		At 0.05 level, when equal variance is assumed, Mean1 - Mean2 is significantly different from 0
	Overall	7612	0.71095	0.02763	0.000316703	0.71111		Equal Variance NOT Assumed (Welch Correction)	-8.33855	6.00606	0.000160693		At 0.05 level, when equal variance is NOT assumed, Mean1 - Mean2 is significantly different from 0
		N	Mean	SD	SEM	Median
fN_PG1SD		7605	0.04368	0.01572	0.000180311	0.04255							Null Hypothesis: mean1-mean2 = 0
fN_novel OG		7	0.07614	0.03615	0.01366	0.06612			t Statistic	DF	Prob>|t|		Alternative Hypothesis: mean1-mean2 <> 0
	Difference		-0.03246		0.00596			Equal Variance Assumed	-5.44956	7610	5.20751e-08		At 0.05 level, when equal variance is assumed, Mean1 - Mean2 is significantly different from 0
	Overall	7612	0.04371	0.01578	0.000180873	0.0426		Equal Variance NOT Assumed (Welch Correction)	-2.37549	6.00209	0.05509		At 0.05 level, when equal variance is NOT assumed, Mean1 - Mean2 is NOT significantly different from 0
rSM, rNM and rNS parameters of PGs and novel OGs
		N	Mean	SD	SEM	Median
rSM_PG1SD		9059	0.34523	0.06137	0.000644805	0.34259							Null Hypothesis: mean1-mean2 = 0
rSM_novel OG		7	0.11674	0.01358	0.00513	0.11613			t Statistic	DF	Prob>|t|		Alternative Hypothesis: mean1-mean2 <> 0
	Difference		0.22849		0.0232			Equal Variance Assumed	9.84937	9064	8.97287e-23		At 0.05 level, when equal variance is assumed, Mean1 - Mean2 is significantly different from 0
	Overall	9066	0.34505	0.06168	0.000647756	0.34255		Equal Variance NOT Assumed (Welch Correction)	44.1544	6.19075	5.64909e-09		At 0.05 level, when equal variance is NOT assumed, Mean1 - Mean2 is significantly different from 0
		N	Mean	SD	SEM	Median
rNM_PG1SD		9059	0.0607	0.02595	0.000272684	0.05839							Null Hypothesis: mean1-mean2 = 0
rNM_novel OG		7	0.09383	0.04928	0.01863	0.08081			t Statistic	DF	Prob>|t|		Alternative Hypothesis: mean1-mean2 <> 0
	Difference		-0.03313		0.00982			Equal Variance Assumed	-3.37354	9064	0.000745184		At 0.05 level, when equal variance is assumed, Mean1 - Mean2 is significantly different from 0
	Overall	9066	0.06072	0.02599	0.00027297	0.05839		Equal Variance NOT Assumed (Welch Correction)	-1.77869	6.00257	0.12558		At 0.05 level, when equal variance is NOT assumed, Mean1 - Mean2 is NOT significantly different from 0
		N	Mean	SD	SEM	Median
rNS_PG1SD		9059	0.18403	0.09138	0.000960121	0.17021							Null Hypothesis: mean1-mean2 = 0
rNS_novel OG		7	0.79716	0.4069	0.15379	0.6			t Statistic	DF	Prob>|t|		Alternative Hypothesis: mean1-mean2 <> 0
	Difference		-0.61313		0.03477			Equal Variance Assumed	-17.6351	9064	1.82815e-68		At 0.05 level, when equal variance is assumed, Mean1 - Mean2 is significantly different from 0
	Overall	9066	0.1845	0.09351	0.000982086	0.17021		Equal Variance NOT Assumed (Welch Correction)	-3.98665	6.00047	0.00723		At 0.05 level, when equal variance is NOT assumed, Mean1 - Mean2 is significantly different from 0
rSMN, rMSN and rNSM parameters of PGs and novel OGs
		N	Mean	SD	SEM	Median
rSMN_PG1SD		9403	0.32572	0.05962	0.00061485	0.32394							Null Hypothesis: mean1-mean2 = 0
rSMN_novel OG		7	0.10675	0.01187	0.00449	0.10101			t Statistic	DF	Prob>|t|		Alternative Hypothesis: mean1-mean2 <> 0
	Difference		0.21897		0.02254			Equal Variance Assumed	9.7163	9408	3.26725e-22		At 0.05 level, when equal variance is assumed, Mean1 - Mean2 is significantly different from 0
	Overall	9410	0.32555	0.0599	0.000617475	0.32388		Equal Variance NOT Assumed (Welch Correction)	48.3685	6.22763	2.92958e-09		At 0.05 level, when equal variance is NOT assumed, Mean1 - Mean2 is significantly different from 0
		N	Mean	SD	SEM	Median
rMSN_PG1SD		9403	2.52734	0.42422	0.00437	2.47619							Null Hypothesis: mean1-mean2 = 0
rMSN_novel OG		7	5.02406	1.251	0.47283	4.64516			t Statistic	DF	Prob>|t|		Alternative Hypothesis: mean1-mean2 <> 0
	Difference		-2.49671		0.16079			Equal Variance Assumed	-15.5276	9408	1.04418e-53		At 0.05 level, when equal variance is assumed, Mean1 - Mean2 is significantly different from 0
	Overall	9410	2.5292	0.43065	0.00444	2.4771		Equal Variance NOT Assumed (Welch Correction)	-5.28011	6.00103	0.00186		At 0.05 level, when equal variance is NOT assumed, Mean1 - Mean2 is significantly different from 0
		N	Mean	SD	SEM	Median
rNSM_PG1SD		9403	0.04568	0.02083	0.000214777	0.04367							Null Hypothesis: mean1-mean2 = 0
rNSM_novel OG		7	0.08388	0.04393	0.01661	0.0708			t Statistic	DF	Prob>|t|		Alternative Hypothesis: mean1-mean2 <> 0
	Difference		-0.0382		0.00788			Equal Variance Assumed	-4.84602	9408	1.27975e-06		At 0.05 level, when equal variance is assumed, Mean1 - Mean2 is significantly different from 0
	Overall	9410	0.04571	0.02087	0.000215189	0.04369		Equal Variance NOT Assumed (Welch Correction)	-2.30038	6.00201	0.06105		At 0.05 level, when equal variance is NOT assumed, Mean1 - Mean2 is NOT significantly different from 0
fS, fM and fN parameters of PGs and novel TSGs
		N	Mean	SD	SEM	Median
fS_PG1SD		7605	0.24548	0.03079	0.000353046	0.24561							Null Hypothesis: mean1-mean2 = 0
fS_novel TSG		17	0.18367	0.05857	0.01421	0.2			t Statistic	DF	Prob>|t|		Alternative Hypothesis: mean1-mean2 <> 0
	Difference		0.06181		0.0075			Equal Variance Assumed	8.24596	7620	1.91346e-16		At 0.05 level, when equal variance is assumed, Mean1 - Mean2 is significantly different from 0
	Overall	7622	0.24534	0.03101	0.000355171	0.24561		Equal Variance NOT Assumed (Welch Correction)	4.34985	16.0198	0.000495043		At 0.05 level, when equal variance is NOT assumed, Mean1 - Mean2 is significantly different from 0
		N	Mean	SD	SEM	Median
fM_PG1SD		7605	0.71084	0.0274	0.000314162	0.71105							Null Hypothesis: mean1-mean2 = 0
fM_novel TSG		17	0.65401	0.0707	0.01715	0.64151			t Statistic	DF	Prob>|t|		Alternative Hypothesis: mean1-mean2 <> 0
	Difference		0.05684		0.00669			Equal Variance Assumed	8.49387	7620	2.37942e-17		At 0.05 level, when equal variance is assumed, Mean1 - Mean2 is significantly different from 0
	Overall	7622	0.71072	0.02769	0.00031714	0.71094		Equal Variance NOT Assumed (Welch Correction)	3.31432	16.0107	0.00438		At 0.05 level, when equal variance is NOT assumed, Mean1 - Mean2 is significantly different from 0
		N	Mean	SD	SEM	Median
fN_PG1SD		7605	0.04368	0.01572	0.000180311	0.04255							Null Hypothesis: mean1-mean2 = 0
fN_novel TSG		17	0.16233	0.05682	0.01378	0.17943			t Statistic	DF	Prob>|t|		Alternative Hypothesis: mean1-mean2 <> 0
	Difference		-0.11865		0.00387			Equal Variance Assumed	-30.6904	7620	3.94446e-195		At 0.05 level, when equal variance is assumed, Mean1 - Mean2 is significantly different from 0
	Overall	7622	0.04394	0.01688	0.000193307	0.04265		Equal Variance NOT Assumed (Welch Correction)	-8.60833	16.0055	2.11042e-07		At 0.05 level, when equal variance is NOT assumed, Mean1 - Mean2 is significantly different from 0
rSM, rNM and rNS parameters of PGs and novel TSGs
		N	Mean	SD	SEM	Median
rSM_PG1SD		9059	0.34523	0.06137	0.000644805	0.34259							Null Hypothesis: mean1-mean2 = 0
rSM_novel TSG		17	0.28949	0.10912	0.02646	0.31707			t Statistic	DF	Prob>|t|		Alternative Hypothesis: mean1-mean2 <> 0
	Difference		0.05573		0.01493			Equal Variance Assumed	3.73373	9074	0.000189816		At 0.05 level, when equal variance is assumed, Mean1 - Mean2 is significantly different from 0
	Overall	9076	0.34512	0.06153	0.000645887	0.34255		Equal Variance NOT Assumed (Welch Correction)	2.10536	16.019	0.05139		At 0.05 level, when equal variance is NOT assumed, Mean1 - Mean2 is NOT significantly different from 0
		N	Mean	SD	SEM	Median
rNM_PG1SD		9059	0.0607	0.02595	0.000272684	0.05839							Null Hypothesis: mean1-mean2 = 0
rNM_novel TSG		17	0.25611	0.10403	0.02523	0.26582			t Statistic	DF	Prob>|t|		Alternative Hypothesis: mean1-mean2 <> 0
	Difference		-0.19541		0.00638			Equal Variance Assumed	-30.611	9074	6.27604e-196		At 0.05 level, when equal variance is assumed, Mean1 - Mean2 is significantly different from 0
	Overall	9076	0.06106	0.02762	0.000289909	0.05844		Equal Variance NOT Assumed (Welch Correction)	-7.74472	16.0037	8.41157e-07		At 0.05 level, when equal variance is NOT assumed, Mean1 - Mean2 is significantly different from 0
		N	Mean	SD	SEM	Median
rNS_PG1SD		9059	0.18403	0.09138	0.000960121	0.17021							Null Hypothesis: mean1-mean2 = 0
rNS_novel TSG		17	1.04822	0.70234	0.17034	0.93443			t Statistic	DF	Prob>|t|		Alternative Hypothesis: mean1-mean2 <> 0
	Difference		-0.86419		0.02329			Equal Variance Assumed	-37.1016	9074	1.16489e-280		At 0.05 level, when equal variance is assumed, Mean1 - Mean2 is significantly different from 0
	Overall	9076	0.18565	0.10296	0.00108	0.17054		Equal Variance NOT Assumed (Welch Correction)	-5.0732	16.001	0.000112918		At 0.05 level, when equal variance is NOT assumed, Mean1 - Mean2 is significantly different from 0
rSMN, rMSN and rNSM parameters of PGs and novel TSGs
		N	Mean	SD	SEM	Median
rSMN_PG1SD		9403	0.32572	0.05962	0.00061485	0.32394							Null Hypothesis: mean1-mean2 = 0
rSMN_novel TSG		17	0.23083	0.08681	0.02106	0.25			t Statistic	DF	Prob>|t|		Alternative Hypothesis: mean1-mean2 <> 0
	Difference		0.09488		0.01449			Equal Variance Assumed	6.54935	9418	6.08082e-11		At 0.05 level, when equal variance is assumed, Mean1 - Mean2 is significantly different from 0
	Overall	9420	0.32554	0.05981	0.000616245	0.32381		Equal Variance NOT Assumed (Welch Correction)	4.50434	16.0273	0.000358855		At 0.05 level, when equal variance is NOT assumed, Mean1 - Mean2 is significantly different from 0
		N	Mean	SD	SEM	Median
rMSN_PG1SD		9403	2.52734	0.42422	0.00437	2.47619							Null Hypothesis: mean1-mean2 = 0
rMSN_novel TSG		17	2.03188	0.77326	0.18754	1.78947			t Statistic	DF	Prob>|t|		Alternative Hypothesis: mean1-mean2 <> 0
	Difference		0.49546		0.10318			Equal Variance Assumed	4.8017	9418	1.59751e-06		At 0.05 level, when equal variance is assumed, Mean1 - Mean2 is significantly different from 0
	Overall	9420	2.52645	0.42555	0.00438	2.4761		Equal Variance NOT Assumed (Welch Correction)	2.6411	16.0174	0.01778		At 0.05 level, when equal variance is NOT assumed, Mean1 - Mean2 is significantly different from 0
		N	Mean	SD	SEM	Median
rNSM_PG1SD		9403	0.04568	0.02083	0.000214777	0.04367							Null Hypothesis: mean1-mean2 = 0
rNSM_novel TSG		17	0.1988	0.07873	0.01909	0.21866			t Statistic	DF	Prob>|t|		Alternative Hypothesis: mean1-mean2 <> 0
	Difference		-0.15312		0.00511			Equal Variance Assumed	-29.9504	9418	2.42375e-188		At 0.05 level, when equal variance is assumed, Mean1 - Mean2 is significantly different from 0
	Overall	9420	0.04596	0.02204	0.000227078	0.04373		Equal Variance NOT Assumed (Welch Correction)	-8.01897	16.004	5.36823e-07		At 0.05 level, when equal variance is NOT assumed, Mean1 - Mean2 is significantly different from 0
fS, fM and fN parameters of PGs and TEGs
		N	Mean	SD	SEM	Median
fS_PG1SD		7605	0.24548	0.03079	0.000353046	0.24561							Null Hypothesis: mean1-mean2 = 0
fS_TEG		16	0.4159	0.05963	0.01491	0.3976			t Statistic	DF	Prob>|t|		Alternative Hypothesis: mean1-mean2 <> 0
	Difference		-0.17042		0.00773			Equal Variance Assumed	-22.0578	7619	1.4295e-104		At 0.05 level, when equal variance is assumed, Mean1 - Mean2 is significantly different from 0
	Overall	7621	0.24584	0.03184	0.000364722	0.24576		Equal Variance NOT Assumed (Welch Correction)	-11.4285	15.0168	8.29641e-09		At 0.05 level, when equal variance is NOT assumed, Mean1 - Mean2 is significantly different from 0
		N	Mean	SD	SEM	Median
fM_PG1SD		7605	0.71084	0.0274	0.000314162	0.71105							Null Hypothesis: mean1-mean2 = 0
fM_TEG		16	0.54903	0.05483	0.01371	0.57392			t Statistic	DF	Prob>|t|		Alternative Hypothesis: mean1-mean2 <> 0
	Difference		0.16181		0.00688			Equal Variance Assumed	23.5299	7619	3.0704e-118		At 0.05 level, when equal variance is assumed, Mean1 - Mean2 is significantly different from 0
	Overall	7621	0.7105	0.02846	0.000325973	0.71084		Equal Variance NOT Assumed (Welch Correction)	11.8015	15.0158	5.36442e-09		At 0.05 level, when equal variance is NOT assumed, Mean1 - Mean2 is significantly different from 0
		N	Mean	SD	SEM	Median
fN_PG1SD		7605	0.04368	0.01572	0.000180311	0.04255							Null Hypothesis: mean1-mean2 = 0
fN_TEG		16	0.03507	0.0238	0.00595	0.03214			t Statistic	DF	Prob>|t|		Alternative Hypothesis: mean1-mean2 <> 0
	Difference		0.00861		0.00394			Equal Variance Assumed	2.18473	7619	0.02894		At 0.05 level, when equal variance is assumed, Mean1 - Mean2 is significantly different from 0
	Overall	7621	0.04366	0.01575	0.000180396	0.04255		Equal Variance NOT Assumed (Welch Correction)	1.44595	15.0276	0.16872		At 0.05 level, when equal variance is NOT assumed, Mean1 - Mean2 is NOT significantly different from 0
rSM, rNM and rNS parameters of PGs and TEGs
		N	Mean	SD	SEM	Median
rSM_PG1SD		9059	0.34523	0.06137	0.000644805	0.34259							Null Hypothesis: mean1-mean2 = 0
rSM_TEG		16	0.77684	0.21358	0.05339	0.69204			t Statistic	DF	Prob>|t|		Alternative Hypothesis: mean1-mean2 <> 0
	Difference		-0.43161		0.0155			Equal Variance Assumed	-70.5263	13185	0		At 0.05 level, when equal variance is assumed, Mean1 - Mean2 is significantly different from 0
	Overall	9075	0.34599	0.06452	0.000677311	0.34274		Equal Variance NOT Assumed (Welch Correction)	-9.65417	134.023	4.59475e-17		At 0.05 level, when equal variance is NOT assumed, Mean1 - Mean2 is significantly different from 0
		N	Mean	SD	SEM	Median
rNM_PG1SD		9059	0.0607	0.02595	0.000272684	0.05839							Null Hypothesis: mean1-mean2 = 0
rNM_TEG		16	0.06444	0.0436	0.0109	0.05586			t Statistic	DF	Prob>|t|		Alternative Hypothesis: mean1-mean2 <> 0
	Difference		-0.00375		0.0065			Equal Variance Assumed	-0.57598	9073	0.56464		At 0.05 level, when equal variance is assumed, Mean1 - Mean2 is NOT significantly different from 0
	Overall	9075	0.0607	0.02599	0.000272844	0.05839		Equal Variance NOT Assumed (Welch Correction)	-0.34361	15.0188	0.7359		At 0.05 level, when equal variance is NOT assumed, Mean1 - Mean2 is NOT significantly different from 0
		N	Mean	SD	SEM	Median
rNS_PG1SD		9059	0.18403	0.09138	0.000960121	0.17021							Null Hypothesis: mean1-mean2 = 0
rNS_TEG		16	0.08895	0.06769	0.01692	0.08201			t Statistic	DF	Prob>|t|		Alternative Hypothesis: mean1-mean2 <> 0
	Difference		0.09507		0.02286			Equal Variance Assumed	4.15936	9073	3.22084e-05		At 0.05 level, when equal variance is assumed, Mean1 - Mean2 is significantly different from 0
	Overall	9075	0.18386	0.09143	0.000959778	0.17021		Equal Variance NOT Assumed (Welch Correction)	5.60911	15.0967	4.86246e-05		At 0.05 level, when equal variance is NOT assumed, Mean1 - Mean2 is significantly different from 0
rSMN, rMSN and rNSM parameters of PGs and TEGs
		N	Mean	SD	SEM	Median
rSMN_PG1SD		9403	0.32572	0.05962	0.00061485	0.32394							Null Hypothesis: mean1-mean2 = 0
rSMN_TEG		16	0.73172	0.20792	0.05198	0.66004			t Statistic	DF	Prob>|t|		Alternative Hypothesis: mean1-mean2 <> 0
	Difference		-0.40601		0.01505			Equal Variance Assumed	-26.977	9417	1.8386e-154		At 0.05 level, when equal variance is assumed, Mean1 - Mean2 is significantly different from 0
	Overall	9419	0.32641	0.06243	0.000643233	0.32411		Equal Variance NOT Assumed (Welch Correction)	-7.81012	15.0042	1.15395e-06		At 0.05 level, when equal variance is NOT assumed, Mean1 - Mean2 is significantly different from 0
		N	Mean	SD	SEM	Median
rMSN_PG1SD		9403	2.52734	0.42422	0.00437	2.47619							Null Hypothesis: mean1-mean2 = 0
rMSN_TEG		16	1.24466	0.23976	0.05994	1.34701			t Statistic	DF	Prob>|t|		Alternative Hypothesis: mean1-mean2 <> 0
	Difference		1.28268		0.10609			Equal Variance Assumed	12.0908	9417	2.08687e-33		At 0.05 level, when equal variance is assumed, Mean1 - Mean2 is significantly different from 0
	Overall	9419	2.52516	0.42724	0.0044	2.475		Equal Variance NOT Assumed (Welch Correction)	21.3425	15.1602	1.00264e-12		At 0.05 level, when equal variance is NOT assumed, Mean1 - Mean2 is significantly different from 0
		N	Mean	SD	SEM	Median
rNSM_PG1SD		9403	0.04568	0.02083	0.000214777	0.04367							Null Hypothesis: mean1-mean2 = 0
rNSM_TEG		16	0.03694	0.02588	0.00647	0.03323			t Statistic	DF	Prob>|t|		Alternative Hypothesis: mean1-mean2 <> 0
	Difference		0.00874		0.00521			Equal Variance Assumed	1.67592	9417	0.09379		At 0.05 level, when equal variance is assumed, Mean1 - Mean2 is NOT significantly different from 0
	Overall	9419	0.04567	0.02084	0.000214708	0.04367		Equal Variance NOT Assumed (Welch Correction)	1.34941	15.0331	0.19718		At 0.05 level, when equal variance is NOT assumed, Mean1 - Mean2 is NOT significantly different from 0
