# Supplementary material for: Use of signals of positive and negative selection to distinguish cancer genes and passenger genes
Source: eLife. 2021 Jan 11;10:e59629. doi: 10.7554/eLife.59629 (PMC7877913; doi:10.7554/eLife.59629)
Supplement: Supplementary file 30. [file elife-59629-supp30.xlsx]

## Sheet: PG_SOf-PG_SSIf
PG_SSIf_1SD	PG_SOf_1SD	in both lists			Number of transcripts	%
JUN	JUN	JUN		PG_SSIf_1SD	7791	90.181
A1BG				PG_SOf_1SD	7605	92.3866
A1CF	A1CF	A1CF		in both lists	7026
A1CF_ENST00000282641	A1CF_ENST00000282641	A1CF_ENST00000282641
A1CF_ENST00000373995	A1CF_ENST00000373995	A1CF_ENST00000373995
A2M	A2M	A2M
A2ML1	A2ML1	A2ML1
AADACL3_ENST00000359318	AADACL3_ENST00000359318	AADACL3_ENST00000359318
AAK1	AAK1	AAK1
AAK1_ENST00000409085	AAK1_ENST00000409085	AAK1_ENST00000409085
AARS	AARS	AARS
AARS2	AARS2	AARS2
AASS	AASS	AASS
AATK	AATK	AATK
AATK_ENST00000326724	AATK_ENST00000326724	AATK_ENST00000326724
ABCA1	ABCA1	ABCA1
ABCA12	ABCA12	ABCA12
ABCA12_ENST00000389661	ABCA12_ENST00000389661	ABCA12_ENST00000389661
ABCA13	ABCA13	ABCA13
ABCA13_ENST00000435803	ABCA13_ENST00000435803	ABCA13_ENST00000435803
ABCA4	ABCA4	ABCA4
ABCA4_ENST00000535735	ABCA4_ENST00000535735	ABCA4_ENST00000535735
ABCA7	ABCA7	ABCA7
ABCA9	ABCA9	ABCA9
ABCB1	ABCB1	ABCB1
ABCB11	ABCB11	ABCB11
ABCB11_ENST00000263817	ABCB11_ENST00000263817	ABCB11_ENST00000263817
ABCB4_ENST00000265723	ABCB4_ENST00000265723	ABCB4_ENST00000265723
ABCB7	ABCB7	ABCB7
ABCC11	ABCC11	ABCC11
ABCC12	ABCC12	ABCC12
ABCC2	ABCC2	ABCC2
ABCC3	ABCC3	ABCC3
ABCC4	ABCC4	ABCC4
ABCC4_ENST00000376887	ABCC4_ENST00000376887	ABCC4_ENST00000376887
ABCC9	ABCC9	ABCC9
ABCC9_ENST00000261201	ABCC9_ENST00000261201	ABCC9_ENST00000261201
ABCD1	ABCD1	ABCD1
ABCF3	ABCF3	ABCF3
ABCG1	ABCG1	ABCG1
ABCG2	ABCG2	ABCG2
ABCG2_ENST00000237612	ABCG2_ENST00000237612	ABCG2_ENST00000237612
ABHD16A	ABHD16A	ABHD16A
ABHD2
ABI3BP	ABI3BP	ABI3BP
ABL1	ABL1	ABL1
ABL1_ENST00000372348
ABLIM1	ABLIM1	ABLIM1
ABLIM1_ENST00000277895	ABLIM1_ENST00000277895	ABLIM1_ENST00000277895
ABLIM1_ENST00000336585	ABLIM1_ENST00000336585	ABLIM1_ENST00000336585
ABLIM3	ABLIM3	ABLIM3
ABLIM3_ENST00000504238	ABLIM3_ENST00000504238	ABLIM3_ENST00000504238
ABP1	ABP1	ABP1
ABP1_ENST00000416793	ABP1_ENST00000416793	ABP1_ENST00000416793
ABR	ABR	ABR
ABR_ENST00000291107	ABR_ENST00000291107	ABR_ENST00000291107
ABRA	ABRA	ABRA
ABTB1	ABTB1	ABTB1
AC022601.1	AC022601.1	AC022601.1
AC022601.1_ENST00000554864	AC022601.1_ENST00000554864	AC022601.1_ENST00000554864
AC099524.1	AC099524.1	AC099524.1
ACACB	ACACB	ACACB
ACACB_ENST00000543201	ACACB_ENST00000543201	ACACB_ENST00000543201
ACAD11	ACAD11	ACAD11
ACAD9	ACAD9	ACAD9
ACAN	ACAN	ACAN
ACAP3	ACAP3	ACAP3
ACAP3_ENST00000354700	ACAP3_ENST00000354700	ACAP3_ENST00000354700
ACBD5	ACBD5	ACBD5
ACBD5_ENST00000375888	ACBD5_ENST00000375888	ACBD5_ENST00000375888
ACBD5_ENST00000396271	ACBD5_ENST00000396271	ACBD5_ENST00000396271
ACCN3	ACCN3	ACCN3
ACE	ACE	ACE
ACE_ENST00000290863	ACE_ENST00000290863	ACE_ENST00000290863
ACE_ENST00000490216	ACE_ENST00000490216	ACE_ENST00000490216
ACE2	ACE2	ACE2
ACHE	ACHE	ACHE
ACHE_ENST00000412389	ACHE_ENST00000412389	ACHE_ENST00000412389
ACLY	ACLY	ACLY
ACO1	ACO1	ACO1
ACO1_ENST00000379923	ACO1_ENST00000379923	ACO1_ENST00000379923
ACO2	ACO2	ACO2
ACOT11	ACOT11	ACOT11
ACOX1	ACOX1	ACOX1
ACOX1_ENST00000301608	ACOX1_ENST00000301608	ACOX1_ENST00000301608
ACOX2	ACOX2	ACOX2
ACOXL	ACOXL	ACOXL
ACOXL_ENST00000439055	ACOXL_ENST00000439055	ACOXL_ENST00000439055
ACPP	ACPP	ACPP
ACPP_ENST00000351273	ACPP_ENST00000351273	ACPP_ENST00000351273
ACPT	ACPT	ACPT
ACRC	ACRC	ACRC
ACTB
ACTBL2	ACTBL2	ACTBL2
ACTG2
ACTN1	ACTN1	ACTN1
ACTN1_ENST00000394419	ACTN1_ENST00000394419	ACTN1_ENST00000394419
ACTN4	ACTN4	ACTN4
ACTR5	ACTR5	ACTR5
ACTR8
ACTRT1
ACVR1C	ACVR1C	ACVR1C
ACVR2B	ACVR2B	ACVR2B
ACVR2B_ENST00000352511	ACVR2B_ENST00000352511	ACVR2B_ENST00000352511
ACVRL1	ACVRL1	ACVRL1
ACVRL1_ENST00000550683	ACVRL1_ENST00000550683	ACVRL1_ENST00000550683
ACSBG1	ACSBG1	ACSBG1
ACSBG2	ACSBG2	ACSBG2
ACCSL	ACCSL	ACCSL
ACSL1	ACSL1	ACSL1
ACSL6	ACSL6	ACSL6
ACSL6_ENST00000379249	ACSL6_ENST00000379249	ACSL6_ENST00000379249
ACSL6_ENST00000379264	ACSL6_ENST00000379264	ACSL6_ENST00000379264
ACSL6_ENST00000379272	ACSL6_ENST00000379272	ACSL6_ENST00000379272
ACSM2A
ACSM2B	ACSM2B	ACSM2B
ACSM3	ACSM3	ACSM3
ACSM4	ACSM4	ACSM4
ACSM4_ENST00000399422	ACSM4_ENST00000399422	ACSM4_ENST00000399422
ACSM5	ACSM5	ACSM5
ACSS1	ACSS1	ACSS1
ACSS1_ENST00000537502	ACSS1_ENST00000537502	ACSS1_ENST00000537502
ACSS1_ENST00000542618
ACSS2	ACSS2	ACSS2
ACSS2_ENST00000253382	ACSS2_ENST00000253382	ACSS2_ENST00000253382
ADAD1	ADAD1	ADAD1
ADAD2	ADAD2	ADAD2
ADAM11	ADAM11	ADAM11
ADAM11_ENST00000200557	ADAM11_ENST00000200557	ADAM11_ENST00000200557
ADAM12	ADAM12	ADAM12
ADAM12_ENST00000368676	ADAM12_ENST00000368676	ADAM12_ENST00000368676
ADAM12_ENST00000368679	ADAM12_ENST00000368679	ADAM12_ENST00000368679
ADAM15	ADAM15	ADAM15
ADAM17	ADAM17	ADAM17
ADAM18	ADAM18	ADAM18
ADAM19	ADAM19	ADAM19
ADAM19_ENST00000257527	ADAM19_ENST00000257527	ADAM19_ENST00000257527
ADAM19_ENST00000394020	ADAM19_ENST00000394020	ADAM19_ENST00000394020
ADAM19_ENST00000430702	ADAM19_ENST00000430702	ADAM19_ENST00000430702
ADAM2	ADAM2	ADAM2
ADAM21	ADAM21	ADAM21
ADAM21_ENST00000267499	ADAM21_ENST00000267499	ADAM21_ENST00000267499
ADAM22	ADAM22	ADAM22
ADAM22_ENST00000265727	ADAM22_ENST00000265727	ADAM22_ENST00000265727
ADAM22_ENST00000315984	ADAM22_ENST00000315984	ADAM22_ENST00000315984
ADAM23	ADAM23	ADAM23
ADAM23_ENST00000374415	ADAM23_ENST00000374415	ADAM23_ENST00000374415
ADAM23_ENST00000374416	ADAM23_ENST00000374416	ADAM23_ENST00000374416
ADAM28	ADAM28	ADAM28
ADAM29	ADAM29	ADAM29
ADAM30	ADAM30	ADAM30
ADAM32	ADAM32	ADAM32
ADAM33	ADAM33	ADAM33
ADAM7	ADAM7	ADAM7
ADAM9	ADAM9	ADAM9
ADAMTS1	ADAMTS1	ADAMTS1
ADAMTS10	ADAMTS10	ADAMTS10
ADAMTS12	ADAMTS12	ADAMTS12
ADAMTS13	ADAMTS13	ADAMTS13
ADAMTS14	ADAMTS14	ADAMTS14
ADAMTS14_ENST00000373208	ADAMTS14_ENST00000373208	ADAMTS14_ENST00000373208
ADAMTS15	ADAMTS15	ADAMTS15
ADAMTS16	ADAMTS16	ADAMTS16
ADAMTS16_ENST00000274181	ADAMTS16_ENST00000274181	ADAMTS16_ENST00000274181
ADAMTS18	ADAMTS18	ADAMTS18
ADAMTS19	ADAMTS19	ADAMTS19
ADAMTS19_ENST00000274487	ADAMTS19_ENST00000274487	ADAMTS19_ENST00000274487
ADAMTS2	ADAMTS2	ADAMTS2
ADAMTS2_ENST00000274609	ADAMTS2_ENST00000274609	ADAMTS2_ENST00000274609
ADAMTS20	ADAMTS20	ADAMTS20
ADAMTS20_ENST00000389420	ADAMTS20_ENST00000389420	ADAMTS20_ENST00000389420
ADAMTS20_ENST00000553158
ADAMTS4	ADAMTS4	ADAMTS4
ADAMTS5	ADAMTS5	ADAMTS5
ADAMTS6_ENST00000381055	ADAMTS6_ENST00000381055	ADAMTS6_ENST00000381055
ADAMTS9	ADAMTS9	ADAMTS9
ADAMTSL1	ADAMTSL1	ADAMTSL1
ADAMTSL1_ENST00000380548	ADAMTSL1_ENST00000380548	ADAMTSL1_ENST00000380548
ADAMTSL1_ENST00000380566	ADAMTSL1_ENST00000380566	ADAMTSL1_ENST00000380566
ADAMTSL2	ADAMTSL2	ADAMTSL2
ADAMTSL2_ENST00000393061	ADAMTSL2_ENST00000393061	ADAMTSL2_ENST00000393061
ADAMTSL3	ADAMTSL3	ADAMTSL3
ADAMTSL3_ENST00000567476
ADAMTSL4_ENST00000369039	ADAMTSL4_ENST00000369039	ADAMTSL4_ENST00000369039
ADAMTSL4_ENST00000369041	ADAMTSL4_ENST00000369041	ADAMTSL4_ENST00000369041
ADAR	ADAR	ADAR
ADAR_ENST00000292205	ADAR_ENST00000292205	ADAR_ENST00000292205
ADARB1	ADARB1	ADARB1
ADARB1_ENST00000389863	ADARB1_ENST00000389863	ADARB1_ENST00000389863
ADCK1	ADCK1	ADCK1
ADCK1_ENST00000238561	ADCK1_ENST00000238561	ADCK1_ENST00000238561
ADCY1	ADCY1	ADCY1
ADCY10	ADCY10	ADCY10
ADCY2	ADCY2	ADCY2
ADCY2_ENST00000537121	ADCY2_ENST00000537121	ADCY2_ENST00000537121
ADCY7	ADCY7	ADCY7
ADCY8	ADCY8	ADCY8
ADCYAP1R1
ADD2	ADD2	ADD2
ADD2_ENST00000264436	ADD2_ENST00000264436	ADD2_ENST00000264436
ADD2_ENST00000430656	ADD2_ENST00000430656	ADD2_ENST00000430656
ADH1A	ADH1A	ADH1A
ADH1B
ADH6	ADH6	ADH6
ADH6_ENST00000394899	ADH6_ENST00000394899	ADH6_ENST00000394899
ADNP2	ADNP2	ADNP2
ADORA3_ENST00000369716	ADORA3_ENST00000369716	ADORA3_ENST00000369716
ADRBK1	ADRBK1	ADRBK1
ADRBK2	ADRBK2	ADRBK2
ADSL	ADSL	ADSL
ADSL_ENST00000216194	ADSL_ENST00000216194	ADSL_ENST00000216194
ADSSL1	ADSSL1	ADSSL1
AEBP1	AEBP1	AEBP1
AFAP1L1	AFAP1L1	AFAP1L1
AFAP1L2	AFAP1L2	AFAP1L2
AFAP1L2_ENST00000545353	AFAP1L2_ENST00000545353	AFAP1L2_ENST00000545353
AFF1_ENST00000395146	AFF1_ENST00000395146	AFF1_ENST00000395146
AFF2	AFF2	AFF2
AFF2_ENST00000370460	AFF2_ENST00000370460	AFF2_ENST00000370460
AFF4	AFF4	AFF4
AFG3L2	AFG3L2	AFG3L2
AFM	AFM	AFM
AFTPH	AFTPH	AFTPH
AFTPH_ENST00000238855	AFTPH_ENST00000238855	AFTPH_ENST00000238855
AGAP1	AGAP1	AGAP1
AGAP2	AGAP2	AGAP2
AGAP2_ENST00000547588	AGAP2_ENST00000547588	AGAP2_ENST00000547588
AGAP3	AGAP3	AGAP3
AGBL1	AGBL1	AGBL1
AGBL1_ENST00000389298	AGBL1_ENST00000389298	AGBL1_ENST00000389298
AGBL1_ENST00000441037	AGBL1_ENST00000441037	AGBL1_ENST00000441037
AGBL2
AGC1	AGC1	AGC1
AGMO	AGMO	AGMO
AGPAT4	AGPAT4	AGPAT4
AGPAT6	AGPAT6	AGPAT6
AGPAT9	AGPAT9	AGPAT9
AGPS	AGPS	AGPS
AGRN	AGRN	AGRN
AGTPBP1_ENST00000357081
AGTR1
AHNAK2_ENST00000333244	AHNAK2_ENST00000333244	AHNAK2_ENST00000333244
AHR	AHR	AHR
AICDA	AICDA	AICDA
AIFM1	AIFM1	AIFM1
AIFM3	AIFM3	AIFM3
AIFM3_ENST00000335375	AIFM3_ENST00000335375	AIFM3_ENST00000335375
AIFM3_ENST00000405089	AIFM3_ENST00000405089	AIFM3_ENST00000405089
AIM1	AIM1	AIM1
AIRE	AIRE	AIRE
AJAP1	AJAP1	AJAP1
AK5	AK5	AK5
AK7	AK7	AK7
AK8	AK8	AK8
AKAP1	AKAP1	AKAP1
AKAP12	AKAP12	AKAP12
AKAP12_ENST00000359755	AKAP12_ENST00000359755	AKAP12_ENST00000359755
AKAP13	AKAP13	AKAP13
AKAP13_ENST00000394518	AKAP13_ENST00000394518	AKAP13_ENST00000394518
AKAP17A_ENST00000381261	AKAP17A_ENST00000381261	AKAP17A_ENST00000381261
AKAP2	AKAP2	AKAP2
AKAP3	AKAP3	AKAP3
AKAP3_ENST00000545990	AKAP3_ENST00000545990	AKAP3_ENST00000545990
AKAP4	AKAP4	AKAP4
AKAP6	AKAP6	AKAP6
AKAP9	AKAP9	AKAP9
AKAP9_ENST00000356239	AKAP9_ENST00000356239	AKAP9_ENST00000356239
AKNA	AKNA	AKNA
AKNAD1	AKNAD1	AKNAD1
AKNAD1_ENST00000369995	AKNAD1_ENST00000369995	AKNAD1_ENST00000369995
AKR1D1	AKR1D1	AKR1D1
ALB	ALB	ALB
ALCAM	ALCAM	ALCAM
ALDH16A1	ALDH16A1	ALDH16A1
ALDH18A1	ALDH18A1	ALDH18A1
ALDH1A1	ALDH1A1	ALDH1A1
ALDH1A2
ALDH1A3	ALDH1A3	ALDH1A3
ALDH1L1
ALDH1L2	ALDH1L2	ALDH1L2
ALDH2	ALDH2	ALDH2
ALDH2_ENST00000261733	ALDH2_ENST00000261733	ALDH2_ENST00000261733
ALDH3A1	ALDH3A1	ALDH3A1
ALDH5A1	ALDH5A1	ALDH5A1
ALDH6A1	ALDH6A1	ALDH6A1
ALDH8A1	ALDH8A1	ALDH8A1
ALDOB	ALDOB	ALDOB
ALG1
ALG10B	ALG10B	ALG10B
ALG13_ENST00000251943	ALG13_ENST00000251943	ALG13_ENST00000251943
ALLC	ALLC	ALLC
ALOX12	ALOX12	ALOX12
ALOX12B	ALOX12B	ALOX12B
ALOX12B_ENST00000319144	ALOX12B_ENST00000319144	ALOX12B_ENST00000319144
ALOX15_ENST00000545513	ALOX15_ENST00000545513	ALOX15_ENST00000545513
ALOX15B	ALOX15B	ALOX15B
ALOX5	ALOX5	ALOX5
ALOXE3	ALOXE3	ALOXE3
ALOXE3_ENST00000318227
ALPK1	ALPK1	ALPK1
ALPK2	ALPK2	ALPK2
ALPK2_ENST00000361673	ALPK2_ENST00000361673	ALPK2_ENST00000361673
ALPK3	ALPK3	ALPK3
ALPK3_ENST00000258888	ALPK3_ENST00000258888	ALPK3_ENST00000258888
ALPP	ALPP	ALPP
ALPPL2	ALPPL2	ALPPL2
ALS2	ALS2	ALS2
ALS2CL	ALS2CL	ALS2CL
ALS2CR11	ALS2CR11	ALS2CR11
ALS2CR11_ENST00000439140	ALS2CR11_ENST00000439140	ALS2CR11_ENST00000439140
ALS2CR11_ENST00000450242	ALS2CR11_ENST00000450242	ALS2CR11_ENST00000450242
AMAC1	AMAC1	AMAC1
AMAC1L2	AMAC1L2	AMAC1L2
AMACR	AMACR	AMACR
AMBN	AMBN	AMBN
AMDHD1	AMDHD1	AMDHD1
AMFR
AMHR2
AMIGO2	AMIGO2	AMIGO2
AMOT	AMOT	AMOT
AMOT_ENST00000371958
AMOT_ENST00000371959
AMOTL1	AMOTL1	AMOTL1
AMOTL2
AMPD1_ENST00000520113	AMPD1_ENST00000520113	AMPD1_ENST00000520113
AMPD2_ENST00000393688	AMPD2_ENST00000393688	AMPD2_ENST00000393688
AMPD2_ENST00000393689	AMPD2_ENST00000393689	AMPD2_ENST00000393689
AMPH	AMPH	AMPH
AMPH_ENST00000428293	AMPH_ENST00000428293	AMPH_ENST00000428293
AMY2B	AMY2B	AMY2B
ANAPC1	ANAPC1	ANAPC1
ANAPC2	ANAPC2	ANAPC2
ANAPC4	ANAPC4	ANAPC4
ANAPC5	ANAPC5	ANAPC5
ANGEL1	ANGEL1	ANGEL1
ANGPT2	ANGPT2	ANGPT2
ANGPT2_ENST00000325203	ANGPT2_ENST00000325203	ANGPT2_ENST00000325203
ANGPT4	ANGPT4	ANGPT4
ANGPTL1	ANGPTL1	ANGPTL1
ANGPTL4	ANGPTL4	ANGPTL4
ANGPTL5
ANK1	ANK1	ANK1
ANK1_ENST00000265709	ANK1_ENST00000265709	ANK1_ENST00000265709
ANK2	ANK2	ANK2
ANK2_ENST00000506722	ANK2_ENST00000506722	ANK2_ENST00000506722
ANK3	ANK3	ANK3
ANK3_ENST00000395293
ANKFN1	ANKFN1	ANKFN1
ANKFY1	ANKFY1	ANKFY1
ANKFY1_ENST00000570535
ANKHD1
ANKHD1_ENST00000261805	ANKHD1_ENST00000261805	ANKHD1_ENST00000261805
ANKHD1-EIF4EBP3
ANKIB1	ANKIB1	ANKIB1
ANKK1	ANKK1	ANKK1
ANKLE1	ANKLE1	ANKLE1
ANKLE2	ANKLE2	ANKLE2
ANKLE2_ENST00000337516
ANKRD11	ANKRD11	ANKRD11
ANKRD13C	ANKRD13C	ANKRD13C
ANKRD13D	ANKRD13D	ANKRD13D
ANKRD13D_ENST00000511455	ANKRD13D_ENST00000511455	ANKRD13D_ENST00000511455
ANKRD17	ANKRD17	ANKRD17
ANKRD18A	ANKRD18A	ANKRD18A
ANKRD18B	ANKRD18B	ANKRD18B
ANKRD24
ANKRD24_ENST00000262970
ANKRD24_ENST00000318934	ANKRD24_ENST00000318934	ANKRD24_ENST00000318934
ANKRD26	ANKRD26	ANKRD26
ANKRD27	ANKRD27	ANKRD27
ANKRD30A	ANKRD30A	ANKRD30A
ANKRD30A_ENST00000602533	ANKRD30A_ENST00000602533	ANKRD30A_ENST00000602533
ANKRD30B	ANKRD30B	ANKRD30B
ANKRD30B_ENST00000358984	ANKRD30B_ENST00000358984	ANKRD30B_ENST00000358984
ANKRD32_ENST00000265140	ANKRD32_ENST00000265140	ANKRD32_ENST00000265140
ANKRD34A	ANKRD34A	ANKRD34A
ANKRD34B	ANKRD34B	ANKRD34B
ANKRD35	ANKRD35	ANKRD35
ANKRD36	ANKRD36	ANKRD36
ANKRD44	ANKRD44	ANKRD44
ANKRD44_ENST00000282272	ANKRD44_ENST00000282272	ANKRD44_ENST00000282272
ANKRD44_ENST00000337207	ANKRD44_ENST00000337207	ANKRD44_ENST00000337207
ANKRD44_ENST00000424317	ANKRD44_ENST00000424317	ANKRD44_ENST00000424317
ANKRD5	ANKRD5	ANKRD5
ANKRD52	ANKRD52	ANKRD52
ANKRD55	ANKRD55	ANKRD55
ANKRD6	ANKRD6	ANKRD6
ANKS1A	ANKS1A	ANKS1A
ANKS1A_ENST00000373990	ANKS1A_ENST00000373990	ANKS1A_ENST00000373990
ANKS1B	ANKS1B	ANKS1B
ANKS1B_ENST00000329257	ANKS1B_ENST00000329257	ANKS1B_ENST00000329257
ANKS1B_ENST00000332712	ANKS1B_ENST00000332712	ANKS1B_ENST00000332712
ANKS1B_ENST00000549493	ANKS1B_ENST00000549493	ANKS1B_ENST00000549493
ANKS6	ANKS6	ANKS6
ANKZF1	ANKZF1	ANKZF1
ANLN
ANO2	ANO2	ANO2
ANO2_ENST00000327087	ANO2_ENST00000327087	ANO2_ENST00000327087
ANO2_ENST00000546188	ANO2_ENST00000546188	ANO2_ENST00000546188
ANO3
ANO4	ANO4	ANO4
ANO6_ENST00000425752
ANO8	ANO8	ANO8
ANPEP	ANPEP	ANPEP
ANUBL1	ANUBL1	ANUBL1
ANXA13	ANXA13	ANXA13
ANXA6	ANXA6	ANXA6
ANXA6_ENST00000354546	ANXA6_ENST00000354546	ANXA6_ENST00000354546
AOAH	AOAH	AOAH
AOC2	AOC2	AOC2
AOC3	AOC3	AOC3
AOF2
AP1G1	AP1G1	AP1G1
AP1G1_ENST00000393512	AP1G1_ENST00000393512	AP1G1_ENST00000393512
AP1G1_ENST00000423132	AP1G1_ENST00000423132	AP1G1_ENST00000423132
AP1G1_ENST00000433195	AP1G1_ENST00000433195	AP1G1_ENST00000433195
AP1G2
AP1G2_ENST00000535852	AP1G2_ENST00000535852	AP1G2_ENST00000535852
AP2A1	AP2A1	AP2A1
AP2A1_ENST00000359032	AP2A1_ENST00000359032	AP2A1_ENST00000359032
AP2M1	AP2M1	AP2M1
AP3B2	AP3B2	AP3B2
AP4B1	AP4B1	AP4B1
AP4M1	AP4M1	AP4M1
AP5B1	AP5B1	AP5B1
AP5B1_ENST00000532090	AP5B1_ENST00000532090	AP5B1_ENST00000532090
APBA2	APBA2	APBA2
APBB1	APBB1	APBB1
APBB1_ENST00000389906	APBB1_ENST00000389906	APBB1_ENST00000389906
APBB1IP	APBB1IP	APBB1IP
APBB2	APBB2	APBB2
APBB2_ENST00000295974	APBB2_ENST00000295974	APBB2_ENST00000295974
APC2	APC2	APC2
APCDD1L	APCDD1L	APCDD1L
APCDD1L_ENST00000439429	APCDD1L_ENST00000439429	APCDD1L_ENST00000439429
APEH	APEH	APEH
APEX2	APEX2	APEX2
APLP1	APLP1	APLP1
APLP2
APOA5	APOA5	APOA5
APOB	APOB	APOB
APOBR	APOBR	APOBR
APOH	APOH	APOH
APOL5
APP	APP	APP
APPBP2	APPBP2	APPBP2
APPL2	APPL2	APPL2
AQP10	AQP10	AQP10
ARAP1_ENST00000393609	ARAP1_ENST00000393609	ARAP1_ENST00000393609
ARAP2	ARAP2	ARAP2
ARAP3	ARAP3	ARAP3
ARC	ARC	ARC
ARFGEF1
ARFGEF2	ARFGEF2	ARFGEF2
ARHGAP10	ARHGAP10	ARHGAP10
ARHGAP15	ARHGAP15	ARHGAP15
ARHGAP17	ARHGAP17	ARHGAP17
ARHGAP17_ENST00000289968	ARHGAP17_ENST00000289968	ARHGAP17_ENST00000289968
ARHGAP20	ARHGAP20	ARHGAP20
ARHGAP20_ENST00000533353	ARHGAP20_ENST00000533353	ARHGAP20_ENST00000533353
ARHGAP21	ARHGAP21	ARHGAP21
ARHGAP21_ENST00000320481
ARHGAP21_ENST00000376410	ARHGAP21_ENST00000376410	ARHGAP21_ENST00000376410
ARHGAP22
ARHGAP22_ENST00000417247	ARHGAP22_ENST00000417247	ARHGAP22_ENST00000417247
ARHGAP22_ENST00000417912	ARHGAP22_ENST00000417912	ARHGAP22_ENST00000417912
ARHGAP24	ARHGAP24	ARHGAP24
ARHGAP25	ARHGAP25	ARHGAP25
ARHGAP25_ENST00000409202	ARHGAP25_ENST00000409202	ARHGAP25_ENST00000409202
ARHGAP25_ENST00000497079	ARHGAP25_ENST00000497079	ARHGAP25_ENST00000497079
ARHGAP26	ARHGAP26	ARHGAP26
ARHGAP27	ARHGAP27	ARHGAP27
ARHGAP27_ENST00000428638	ARHGAP27_ENST00000428638	ARHGAP27_ENST00000428638
ARHGAP28	ARHGAP28	ARHGAP28
ARHGAP28_ENST00000400091	ARHGAP28_ENST00000400091	ARHGAP28_ENST00000400091
ARHGAP30	ARHGAP30	ARHGAP30
ARHGAP31	ARHGAP31	ARHGAP31
ARHGAP32	ARHGAP32	ARHGAP32
ARHGAP32_ENST00000310343	ARHGAP32_ENST00000310343	ARHGAP32_ENST00000310343
ARHGAP33	ARHGAP33	ARHGAP33
ARHGAP33_ENST00000378944	ARHGAP33_ENST00000378944	ARHGAP33_ENST00000378944
ARHGAP36	ARHGAP36	ARHGAP36
ARHGAP36_ENST00000276211	ARHGAP36_ENST00000276211	ARHGAP36_ENST00000276211
ARHGAP4	ARHGAP4	ARHGAP4
ARHGAP4_ENST00000370028	ARHGAP4_ENST00000370028	ARHGAP4_ENST00000370028
ARHGAP40_ENST00000373345
ARHGAP42	ARHGAP42	ARHGAP42
ARHGAP44	ARHGAP44	ARHGAP44
ARHGAP6	ARHGAP6	ARHGAP6
ARHGAP6_ENST00000380718	ARHGAP6_ENST00000380718	ARHGAP6_ENST00000380718
ARHGAP6_ENST00000380732	ARHGAP6_ENST00000380732	ARHGAP6_ENST00000380732
ARHGAP6_ENST00000534860
ARHGEF1	ARHGEF1	ARHGEF1
ARHGEF10	ARHGEF10	ARHGEF10
ARHGEF10_ENST00000398560	ARHGEF10_ENST00000398560	ARHGEF10_ENST00000398560
ARHGEF10_ENST00000398564	ARHGEF10_ENST00000398564	ARHGEF10_ENST00000398564
ARHGEF10L	ARHGEF10L	ARHGEF10L
ARHGEF10L_ENST00000361221	ARHGEF10L_ENST00000361221	ARHGEF10L_ENST00000361221
ARHGEF10L_ENST00000375408	ARHGEF10L_ENST00000375408	ARHGEF10L_ENST00000375408
ARHGEF11	ARHGEF11	ARHGEF11
ARHGEF11_ENST00000315174	ARHGEF11_ENST00000315174	ARHGEF11_ENST00000315174
ARHGEF12	ARHGEF12	ARHGEF12
ARHGEF15	ARHGEF15	ARHGEF15
ARHGEF17	ARHGEF17	ARHGEF17
ARHGEF19	ARHGEF19	ARHGEF19
ARHGEF2	ARHGEF2	ARHGEF2
ARHGEF2_ENST00000361247	ARHGEF2_ENST00000361247	ARHGEF2_ENST00000361247
ARHGEF2_ENST00000368315	ARHGEF2_ENST00000368315	ARHGEF2_ENST00000368315
ARHGEF25	ARHGEF25	ARHGEF25
ARHGEF25_ENST00000333972	ARHGEF25_ENST00000333972	ARHGEF25_ENST00000333972
ARHGEF26	ARHGEF26	ARHGEF26
ARHGEF26_ENST00000356448	ARHGEF26_ENST00000356448	ARHGEF26_ENST00000356448
ARHGEF3	ARHGEF3	ARHGEF3
ARHGEF3_ENST00000296315	ARHGEF3_ENST00000296315	ARHGEF3_ENST00000296315
ARHGEF3_ENST00000338458	ARHGEF3_ENST00000338458	ARHGEF3_ENST00000338458
ARHGEF3_ENST00000413728	ARHGEF3_ENST00000413728	ARHGEF3_ENST00000413728
ARHGEF4
ARHGEF5	ARHGEF5	ARHGEF5
ARHGEF6
ARHGEF9
ARHGEF9_ENST00000253401	ARHGEF9_ENST00000253401	ARHGEF9_ENST00000253401
ARHGEF9_ENST00000374878	ARHGEF9_ENST00000374878	ARHGEF9_ENST00000374878
ARID3C	ARID3C	ARID3C
ARID5B	ARID5B	ARID5B
ARMC2	ARMC2	ARMC2
ARMC4	ARMC4	ARMC4
ARMC4_ENST00000434029
ARMC5	ARMC5	ARMC5
ARMC5_ENST00000457010	ARMC5_ENST00000457010	ARMC5_ENST00000457010
ARMC9	ARMC9	ARMC9
ARMCX5	ARMCX5	ARMCX5
ARNT	ARNT	ARNT
ARNT2	ARNT2	ARNT2
ARNTL	ARNTL	ARNTL
ARRB1	ARRB1	ARRB1
ARRB1_ENST00000393505	ARRB1_ENST00000393505	ARRB1_ENST00000393505
ARSB	ARSB	ARSB
ARSD	ARSD	ARSD
ARSF	ARSF	ARSF
ARSI	ARSI	ARSI
ASAP1	ASAP1	ASAP1
ASAP2	ASAP2	ASAP2
ASAP3	ASAP3	ASAP3
ASAP3_ENST00000437606	ASAP3_ENST00000437606	ASAP3_ENST00000437606
ASB10	ASB10	ASB10
ASB10_ENST00000420175	ASB10_ENST00000420175	ASB10_ENST00000420175
ASB10_ENST00000422024	ASB10_ENST00000422024	ASB10_ENST00000422024
ASB15_ENST00000451558	ASB15_ENST00000451558	ASB15_ENST00000451558
ASB17	ASB17	ASB17
ASB3	ASB3	ASB3
ASB4	ASB4	ASB4
ASNS	ASNS	ASNS
ASNS_ENST00000394309	ASNS_ENST00000394309	ASNS_ENST00000394309
ASPG	ASPG	ASPG
ASPH	ASPH	ASPH
ASPM	ASPM	ASPM
ASS1	ASS1	ASS1
ASTL	ASTL	ASTL
ASTN1	ASTN1	ASTN1
ASTN1_ENST00000367654	ASTN1_ENST00000367654	ASTN1_ENST00000367654
ASTN2	ASTN2	ASTN2
ASTN2_ENST00000313400	ASTN2_ENST00000313400	ASTN2_ENST00000313400
ASXL3_ENST00000269197	ASXL3_ENST00000269197	ASXL3_ENST00000269197
ASZ1
ATAD3B	ATAD3B	ATAD3B
ATE1
ATE1_ENST00000224652
ATF2	ATF2	ATF2
ATF7	ATF7	ATF7
ATF7_ENST00000328463	ATF7_ENST00000328463	ATF7_ENST00000328463
ATG16L1
ATG2A	ATG2A	ATG2A
ATG2B	ATG2B	ATG2B
ATG4D	ATG4D	ATG4D
ATG7	ATG7	ATG7
ATL1	ATL1	ATL1
ATN1	ATN1	ATN1
ATP10B	ATP10B	ATP10B
ATP10D	ATP10D	ATP10D
ATP11C	ATP11C	ATP11C
ATP11C_ENST00000361648	ATP11C_ENST00000361648	ATP11C_ENST00000361648
ATP11C_ENST00000370543	ATP11C_ENST00000370543	ATP11C_ENST00000370543
ATP11C_ENST00000370557
ATP12A	ATP12A	ATP12A
ATP12A_ENST00000218548	ATP12A_ENST00000218548	ATP12A_ENST00000218548
ATP13A1_ENST00000291503	ATP13A1_ENST00000291503	ATP13A1_ENST00000291503
ATP13A2	ATP13A2	ATP13A2
ATP13A2_ENST00000341676	ATP13A2_ENST00000341676	ATP13A2_ENST00000341676
ATP13A4	ATP13A4	ATP13A4
ATP13A4_ENST00000295548	ATP13A4_ENST00000295548	ATP13A4_ENST00000295548
ATP13A5	ATP13A5	ATP13A5
ATP1A1	ATP1A1	ATP1A1
ATP1A2	ATP1A2	ATP1A2
ATP1A4	ATP1A4	ATP1A4
ATP1B4	ATP1B4	ATP1B4
ATP1B4_ENST00000218008	ATP1B4_ENST00000218008	ATP1B4_ENST00000218008
ATP2A3_ENST00000352011	ATP2A3_ENST00000352011	ATP2A3_ENST00000352011
ATP2B4	ATP2B4	ATP2B4
ATP2B4_ENST00000367218	ATP2B4_ENST00000367218	ATP2B4_ENST00000367218
ATP2C1	ATP2C1	ATP2C1
ATP2C1_ENST00000393221	ATP2C1_ENST00000393221	ATP2C1_ENST00000393221
ATP2C2	ATP2C2	ATP2C2
ATP4A	ATP4A	ATP4A
ATP5A1	ATP5A1	ATP5A1
ATP5B
ATP6V0A1	ATP6V0A1	ATP6V0A1
ATP6V0A1_ENST00000264649	ATP6V0A1_ENST00000264649	ATP6V0A1_ENST00000264649
ATP6V0A2	ATP6V0A2	ATP6V0A2
ATP6V0A4	ATP6V0A4	ATP6V0A4
ATP7A	ATP7A	ATP7A
ATP7A_ENST00000341514	ATP7A_ENST00000341514	ATP7A_ENST00000341514
ATP7B	ATP7B	ATP7B
ATP8A1	ATP8A1	ATP8A1
ATP8A1_ENST00000264449	ATP8A1_ENST00000264449	ATP8A1_ENST00000264449
ATP8A2	ATP8A2	ATP8A2
ATP8B2	ATP8B2	ATP8B2
ATP8B2_ENST00000368487
ATP8B3	ATP8B3	ATP8B3
ATP8B3_ENST00000525591	ATP8B3_ENST00000525591	ATP8B3_ENST00000525591
ATP8B4	ATP8B4	ATP8B4
ATP9B	ATP9B	ATP9B
ATRNL1	ATRNL1	ATRNL1
ATXN1	ATXN1	ATXN1
ATXN7
ATXN7L1_ENST00000419735
ATXN7L2	ATXN7L2	ATXN7L2
AURKC	AURKC	AURKC
AURKC_ENST00000302804	AURKC_ENST00000302804	AURKC_ENST00000302804
AUTS2	AUTS2	AUTS2
AZGP1
AZI1	AZI1	AZI1
AZI1_ENST00000450824	AZI1_ENST00000450824	AZI1_ENST00000450824
B3GAT2	B3GAT2	B3GAT2
B3GNT3	B3GNT3	B3GNT3
B3GNT7	B3GNT7	B3GNT7
B3GNTL1	B3GNTL1	B3GNTL1
B4GALNT2	B4GALNT2	B4GALNT2
B4GALNT3	B4GALNT3	B4GALNT3
B4GALT5	B4GALT5	B4GALT5
BAAT	BAAT	BAAT
BACE1	BACE1	BACE1
BACH2	BACH2	BACH2
BACH2_ENST00000257749	BACH2_ENST00000257749	BACH2_ENST00000257749
BAG6_ENST00000404765	BAG6_ENST00000404765	BAG6_ENST00000404765
BAHCC1	BAHCC1	BAHCC1
BAHD1	BAHD1	BAHD1
BAI1	BAI1	BAI1
BAI2	BAI2	BAI2
BAI3	BAI3	BAI3
BAIAP2	BAIAP2	BAIAP2
BAIAP2_ENST00000321300	BAIAP2_ENST00000321300	BAIAP2_ENST00000321300
BAIAP2_ENST00000435091	BAIAP2_ENST00000435091	BAIAP2_ENST00000435091
BAIAP3	BAIAP3	BAIAP3
BAIAP3_ENST00000397488	BAIAP3_ENST00000397488	BAIAP3_ENST00000397488
BANK1	BANK1	BANK1
BANP	BANP	BANP
BANP_ENST00000355163	BANP_ENST00000355163	BANP_ENST00000355163
BANP_ENST00000393207	BANP_ENST00000393207	BANP_ENST00000393207
BARHL1	BARHL1	BARHL1
BAZ2A	BAZ2A	BAZ2A
BAZ2A_ENST00000379441	BAZ2A_ENST00000379441	BAZ2A_ENST00000379441
BAZ2A_ENST00000551812	BAZ2A_ENST00000551812	BAZ2A_ENST00000551812
BBS1	BBS1	BBS1
BBS10	BBS10	BBS10
BBS12	BBS12	BBS12
BBS2	BBS2	BBS2
BBS9_ENST00000242067
BBS9_ENST00000354265
BCAM	BCAM	BCAM
BCAS1	BCAS1	BCAS1
BCAS1_ENST00000371440	BCAS1_ENST00000371440	BCAS1_ENST00000371440
BCAS3_ENST00000589222	BCAS3_ENST00000589222	BCAS3_ENST00000589222
BCAT1	BCAT1	BCAT1
BCAT2	BCAT2	BCAT2
BCKDHA
BCKDK	BCKDK	BCKDK
BCKDK_ENST00000394951	BCKDK_ENST00000394951	BCKDK_ENST00000394951
BCL11B	BCL11B	BCL11B
BCL9_ENST00000234739	BCL9_ENST00000234739	BCL9_ENST00000234739
BCO2	BCO2	BCO2
BDP1	BDP1	BDP1
BEGAIN
BEND2	BEND2	BEND2
BEND2_ENST00000380030	BEND2_ENST00000380030	BEND2_ENST00000380030
BEND4	BEND4	BEND4
BEND5
BEND5_ENST00000371833	BEND5_ENST00000371833	BEND5_ENST00000371833
BEST3_ENST00000330891	BEST3_ENST00000330891	BEST3_ENST00000330891
BEST3_ENST00000331471
BFSP1
BFSP1_ENST00000377868
BFSP2	BFSP2	BFSP2
BICD1	BICD1	BICD1
BIRC6
BIRC6_ENST00000421745
BLK	BLK	BLK
BLNK	BLNK	BLNK
BLNK_ENST00000427367	BLNK_ENST00000427367	BLNK_ENST00000427367
BMP1	BMP1	BMP1
BMP1_ENST00000306349	BMP1_ENST00000306349	BMP1_ENST00000306349
BMP1_ENST00000397814	BMP1_ENST00000397814	BMP1_ENST00000397814
BMP1_ENST00000397816	BMP1_ENST00000397816	BMP1_ENST00000397816
BMP10	BMP10	BMP10
BMP15	BMP15	BMP15
BMP2K_ENST00000335016	BMP2K_ENST00000335016	BMP2K_ENST00000335016
BMP2K_ENST00000502871	BMP2K_ENST00000502871	BMP2K_ENST00000502871
BMP3	BMP3	BMP3
BMP4	BMP4	BMP4
BMP5
BMPER	BMPER	BMPER
BNC1	BNC1	BNC1
BNC2	BNC2	BNC2
BNC2_ENST00000380666	BNC2_ENST00000380666	BNC2_ENST00000380666
BNC2_ENST00000411752	BNC2_ENST00000411752	BNC2_ENST00000411752
BNC2_ENST00000418777	BNC2_ENST00000418777	BNC2_ENST00000418777
BOC	BOC	BOC
BOD1L	BOD1L	BOD1L
BPIFB4	BPIFB4	BPIFB4
BPTF	BPTF	BPTF
BPTF_ENST00000335221	BPTF_ENST00000335221	BPTF_ENST00000335221
BRD1	BRD1	BRD1
BRD2_ENST00000395289	BRD2_ENST00000395289	BRD2_ENST00000395289
BRD8	BRD8	BRD8
BRD9	BRD9	BRD9
BRD9_ENST00000467963	BRD9_ENST00000467963	BRD9_ENST00000467963
BRDT	BRDT	BRDT
BRF1	BRF1	BRF1
BRF1_ENST00000440513	BRF1_ENST00000440513	BRF1_ENST00000440513
BRPF1	BRPF1	BRPF1
BRPF3	BRPF3	BRPF3
BRS3	BRS3	BRS3
BRSK1_ENST00000309383	BRSK1_ENST00000309383	BRSK1_ENST00000309383
BRSK2_ENST00000308219
BRWD3	BRWD3	BRWD3
BSG	BSG	BSG
BSN	BSN	BSN
BSND	BSND	BSND
BTAF1	BTAF1	BTAF1
BTBD11	BTBD11	BTBD11
BTBD11_ENST00000357167	BTBD11_ENST00000357167	BTBD11_ENST00000357167
BTBD11_ENST00000490090	BTBD11_ENST00000490090	BTBD11_ENST00000490090
BTBD9	BTBD9	BTBD9
BTBD9_ENST00000403056	BTBD9_ENST00000403056	BTBD9_ENST00000403056
BTN1A1	BTN1A1	BTN1A1
BTN2A1	BTN2A1	BTN2A1
BTN2A1_ENST00000265424	BTN2A1_ENST00000265424	BTN2A1_ENST00000265424
BTN2A2	BTN2A2	BTN2A2
BTN3A3	BTN3A3	BTN3A3
BTNL2
BTNL9	BTNL9	BTNL9
BUB1B	BUB1B	BUB1B
BUB1B_ENST00000412359	BUB1B_ENST00000412359	BUB1B_ENST00000412359
BVES	BVES	BVES
BZRAP1	BZRAP1	BZRAP1
BZRAP1_ENST00000355701	BZRAP1_ENST00000355701	BZRAP1_ENST00000355701
C10orf112	C10orf112	C10orf112
C10orf12	C10orf12	C10orf12
C10orf18	C10orf18	C10orf18
C10orf68_ENST00000375025
C10orf71_ENST00000323868	C10orf71_ENST00000323868	C10orf71_ENST00000323868
C10orf71_ENST00000374144	C10orf71_ENST00000374144	C10orf71_ENST00000374144
C10orf90	C10orf90	C10orf90
C10orf90_ENST00000368674	C10orf90_ENST00000368674	C10orf90_ENST00000368674
C10orf90_ENST00000544758	C10orf90_ENST00000544758	C10orf90_ENST00000544758
C10orf92	C10orf92	C10orf92
C10orf93_ENST00000368582	C10orf93_ENST00000368582	C10orf93_ENST00000368582
C11orf30	C11orf30	C11orf30
C11orf35	C11orf35	C11orf35
C11orf41_ENST00000321505	C11orf41_ENST00000321505	C11orf41_ENST00000321505
C11orf63	C11orf63	C11orf63
C11orf63_ENST00000307257
C11orf82
C12orf40	C12orf40	C12orf40
C12orf51	C12orf51	C12orf51
C12orf51_ENST00000377560	C12orf51_ENST00000377560	C12orf51_ENST00000377560
C12orf56	C12orf56	C12orf56
C12orf63	C12orf63	C12orf63
C13orf40	C13orf40	C13orf40
C14orf102	C14orf102	C14orf102
C14orf159	C14orf159	C14orf159
C14orf166B	C14orf166B	C14orf166B
C14orf21	C14orf21	C14orf21
C14orf37	C14orf37	C14orf37
C14orf50	C14orf50	C14orf50
C15orf2	C15orf2	C15orf2
C15orf39	C15orf39	C15orf39
C15orf39_ENST00000567617	C15orf39_ENST00000567617	C15orf39_ENST00000567617
C15orf42	C15orf42	C15orf42
C16orf62	C16orf62	C16orf62
C16orf62_ENST00000438132	C16orf62_ENST00000438132	C16orf62_ENST00000438132
C16orf62_ENST00000448695	C16orf62_ENST00000448695	C16orf62_ENST00000448695
C16orf7	C16orf7	C16orf7
C16orf71	C16orf71	C16orf71
C16orf78	C16orf78	C16orf78
C16orf96	C16orf96	C16orf96
C17orf101	C17orf101	C17orf101
C17orf53	C17orf53	C17orf53
C17orf56	C17orf56	C17orf56
C17orf74	C17orf74	C17orf74
C17orf80
C18orf1	C18orf1	C18orf1
C18orf8
C19orf2	C19orf2	C19orf2
C19orf21	C19orf21	C19orf21
C19orf26
C19orf28	C19orf28	C19orf28
C19orf51	C19orf51	C19orf51
C19orf55	C19orf55	C19orf55
C19orf57	C19orf57	C19orf57
C19orf6
C1orf112	C1orf112	C1orf112
C1orf116	C1orf116	C1orf116
C1orf127_ENST00000377004	C1orf127_ENST00000377004	C1orf127_ENST00000377004
C1orf129	C1orf129	C1orf129
C1orf129_ENST00000367759	C1orf129_ENST00000367759	C1orf129_ENST00000367759
C1orf150	C1orf150	C1orf150
C1orf167_ENST00000433342	C1orf167_ENST00000433342	C1orf167_ENST00000433342
C1orf168	C1orf168	C1orf168
C1orf172	C1orf172	C1orf172
C1orf173	C1orf173	C1orf173
C1orf173_ENST00000420661	C1orf173_ENST00000420661	C1orf173_ENST00000420661
C1orf177
C1orf65	C1orf65	C1orf65
C1orf87	C1orf87	C1orf87
C1R
C1RL	C1RL	C1RL
C1S	C1S	C1S
C20orf112
C20orf132_ENST00000400441	C20orf132_ENST00000400441	C20orf132_ENST00000400441
C20orf133	C20orf133	C20orf133
C20orf152	C20orf152	C20orf152
C20orf177	C20orf177	C20orf177
C20orf26	C20orf26	C20orf26
C20orf26_ENST00000377306	C20orf26_ENST00000377306	C20orf26_ENST00000377306
C20orf74	C20orf74	C20orf74
C2CD2	C2CD2	C2CD2
C2CD3	C2CD3	C2CD3
C2CD3_ENST00000334126	C2CD3_ENST00000334126	C2CD3_ENST00000334126
C2orf16	C2orf16	C2orf16
C2orf16_ENST00000408964	C2orf16_ENST00000408964	C2orf16_ENST00000408964
C2orf42
C2orf44	C2orf44	C2orf44
C2orf55	C2orf55	C2orf55
C2orf57	C2orf57	C2orf57
C2orf71	C2orf71	C2orf71
C2orf77	C2orf77	C2orf77
C2orf77_ENST00000447353	C2orf77_ENST00000447353	C2orf77_ENST00000447353
C2orf78	C2orf78	C2orf78
C2orf78_ENST00000409561	C2orf78_ENST00000409561	C2orf78_ENST00000409561
C3	C3	C3
C3AR1	C3AR1	C3AR1
C3orf15	C3orf15	C3orf15
C3orf20	C3orf20	C3orf20
C3orf25	C3orf25	C3orf25
C3orf30	C3orf30	C3orf30
C3orf39	C3orf39	C3orf39
C3orf64
C4BPA	C4BPA	C4BPA
C4orf14	C4orf14	C4orf14
C4orf21
C4orf21_ENST00000505019	C4orf21_ENST00000505019	C4orf21_ENST00000505019
C4orf37	C4orf37	C4orf37
C4orf41	C4orf41	C4orf41
C4orf50_ENST00000531445	C4orf50_ENST00000531445	C4orf50_ENST00000531445
C5	C5	C5
C5orf65
C6	C6	C6
C6orf118	C6orf118	C6orf118
C6orf138	C6orf138	C6orf138
C6orf170	C6orf170	C6orf170
C6orf221	C6orf221	C6orf221
C6orf222
C6orf25
C6orf27	C6orf27	C6orf27
C6orf70	C6orf70	C6orf70
C6orf97	C6orf97	C6orf97
C7	C7	C7
C7_ENST00000313164	C7_ENST00000313164	C7_ENST00000313164
C7orf10	C7orf10	C7orf10
C7orf10_ENST00000309930	C7orf10_ENST00000309930	C7orf10_ENST00000309930
C7orf31	C7orf31	C7orf31
C7orf58
C7orf62	C7orf62	C7orf62
C8B	C8B	C8B
C8orf34	C8orf34	C8orf34
C8orf34_ENST00000518698	C8orf34_ENST00000518698	C8orf34_ENST00000518698
C9	C9	C9
C9orf102	C9orf102	C9orf102
C9orf125	C9orf125	C9orf125
C9orf171	C9orf171	C9orf171
C9orf172	C9orf172	C9orf172
C9orf174	C9orf174	C9orf174
C9orf174_ENST00000395220	C9orf174_ENST00000395220	C9orf174_ENST00000395220
C9orf3	C9orf3	C9orf3
C9orf3_ENST00000375315	C9orf3_ENST00000375315	C9orf3_ENST00000375315
C9orf43	C9orf43	C9orf43
C9orf5	C9orf5	C9orf5
C9orf50	C9orf50	C9orf50
C9orf79	C9orf79	C9orf79
C9orf84	C9orf84	C9orf84
C9orf86	C9orf86	C9orf86
C9orf86_ENST00000371663	C9orf86_ENST00000371663	C9orf86_ENST00000371663
C9orf93	C9orf93	C9orf93
C9orf93_ENST00000380689
C9orf96
C9orf98_ENST00000298545	C9orf98_ENST00000298545	C9orf98_ENST00000298545
CA8	CA8	CA8
CABIN1	CABIN1	CABIN1
CABS1	CABS1	CABS1
CACHD1	CACHD1	CACHD1
CACHD1_ENST00000371073	CACHD1_ENST00000371073	CACHD1_ENST00000371073
CACNA1A	CACNA1A	CACNA1A
CACNA1A_ENST00000325084	CACNA1A_ENST00000325084	CACNA1A_ENST00000325084
CACNA1A_ENST00000357018	CACNA1A_ENST00000357018	CACNA1A_ENST00000357018
CACNA1A_ENST00000360228	CACNA1A_ENST00000360228	CACNA1A_ENST00000360228
CACNA1B_ENST00000371355	CACNA1B_ENST00000371355	CACNA1B_ENST00000371355
CACNA1D	CACNA1D	CACNA1D
CACNA1D_ENST00000350061	CACNA1D_ENST00000350061	CACNA1D_ENST00000350061
CACNA1E	CACNA1E	CACNA1E
CACNA1E_ENST00000357570	CACNA1E_ENST00000357570	CACNA1E_ENST00000357570
CACNA1E_ENST00000358338	CACNA1E_ENST00000358338	CACNA1E_ENST00000358338
CACNA1E_ENST00000367567	CACNA1E_ENST00000367567	CACNA1E_ENST00000367567
CACNA1E_ENST00000367573	CACNA1E_ENST00000367573	CACNA1E_ENST00000367573
CACNA1F	CACNA1F	CACNA1F
CACNA1G	CACNA1G	CACNA1G
CACNA1G_ENST00000354983	CACNA1G_ENST00000354983	CACNA1G_ENST00000354983
CACNA1G_ENST00000359106	CACNA1G_ENST00000359106	CACNA1G_ENST00000359106
CACNA1G_ENST00000416767
CACNA1H	CACNA1H	CACNA1H
CACNA1H_ENST00000348261	CACNA1H_ENST00000348261	CACNA1H_ENST00000348261
CACNA1H_ENST00000358590	CACNA1H_ENST00000358590	CACNA1H_ENST00000358590
CACNA2D1_ENST00000356253	CACNA2D1_ENST00000356253	CACNA2D1_ENST00000356253
CACNB2	CACNB2	CACNB2
CACNB2_ENST00000282343	CACNB2_ENST00000282343	CACNB2_ENST00000282343
CACNB2_ENST00000352115	CACNB2_ENST00000352115	CACNB2_ENST00000352115
CACNB2_ENST00000377315	CACNB2_ENST00000377315	CACNB2_ENST00000377315
CACNB2_ENST00000377319	CACNB2_ENST00000377319	CACNB2_ENST00000377319
CACNB2_ENST00000377329	CACNB2_ENST00000377329	CACNB2_ENST00000377329
CACNB3	CACNB3	CACNB3
CACNB4	CACNB4	CACNB4
CACNB4_ENST00000339254
CACNB4_ENST00000534999	CACNB4_ENST00000534999	CACNB4_ENST00000534999
CACNB4_ENST00000539935	CACNB4_ENST00000539935	CACNB4_ENST00000539935
CACNG3	CACNG3	CACNG3
CACNG5_ENST00000533854	CACNG5_ENST00000533854	CACNG5_ENST00000533854
CAD	CAD	CAD
CADM1	CADM1	CADM1
CADM2_ENST00000383699
CADM3	CADM3	CADM3
CADPS	CADPS	CADPS
CADPS_ENST00000383710	CADPS_ENST00000383710	CADPS_ENST00000383710
CADPS2	CADPS2	CADPS2
CADPS2_ENST00000313070	CADPS2_ENST00000313070	CADPS2_ENST00000313070
CAGE1	CAGE1	CAGE1
CAGE1_ENST00000338150	CAGE1_ENST00000338150	CAGE1_ENST00000338150
CAGE1_ENST00000502583	CAGE1_ENST00000502583	CAGE1_ENST00000502583
CALCOCO1	CALCOCO1	CALCOCO1
CALCR
CALCR_ENST00000359558	CALCR_ENST00000359558	CALCR_ENST00000359558
CALCRL	CALCRL	CALCRL
CALD1	CALD1	CALD1
CALN1	CALN1	CALN1
CALN1_ENST00000395275	CALN1_ENST00000395275	CALN1_ENST00000395275
CALR
CALR3	CALR3	CALR3
CAMK1D	CAMK1D	CAMK1D
CAMK1D_ENST00000378847	CAMK1D_ENST00000378847	CAMK1D_ENST00000378847
CAMK2A	CAMK2A	CAMK2A
CAMK2G	CAMK2G	CAMK2G
CAMK2G_ENST00000322635	CAMK2G_ENST00000322635	CAMK2G_ENST00000322635
CAMK2G_ENST00000322680	CAMK2G_ENST00000322680	CAMK2G_ENST00000322680
CAMK4	CAMK4	CAMK4
CAMKK1	CAMKK1	CAMKK1
CAMKK1_ENST00000158166	CAMKK1_ENST00000158166	CAMKK1_ENST00000158166
CAMKK2	CAMKK2	CAMKK2
CAMKK2_ENST00000392473	CAMKK2_ENST00000392473	CAMKK2_ENST00000392473
CAMKK2_ENST00000392474	CAMKK2_ENST00000392474	CAMKK2_ENST00000392474
CAMKV_ENST00000477224	CAMKV_ENST00000477224	CAMKV_ENST00000477224
CAMSAP1	CAMSAP1	CAMSAP1
CAMSAP1_ENST00000409386	CAMSAP1_ENST00000409386	CAMSAP1_ENST00000409386
CAMSAP3	CAMSAP3	CAMSAP3
CAMSAP3_ENST00000446248	CAMSAP3_ENST00000446248	CAMSAP3_ENST00000446248
CAMTA1_ENST00000439411	CAMTA1_ENST00000439411	CAMTA1_ENST00000439411
CAMTA2_ENST00000381311	CAMTA2_ENST00000381311	CAMTA2_ENST00000381311
CAMTA2_ENST00000414043	CAMTA2_ENST00000414043	CAMTA2_ENST00000414043
CAND1	CAND1	CAND1
CAND2_ENST00000456430	CAND2_ENST00000456430	CAND2_ENST00000456430
CANT1	CANT1	CANT1
CAPN11	CAPN11	CAPN11
CAPN12	CAPN12	CAPN12
CAPN13	CAPN13	CAPN13
CAPN14	CAPN14	CAPN14
CAPN2	CAPN2	CAPN2
CAPN3	CAPN3	CAPN3
CAPN3_ENST00000356316	CAPN3_ENST00000356316	CAPN3_ENST00000356316
CAPN3_ENST00000397163	CAPN3_ENST00000397163	CAPN3_ENST00000397163
CAPN5	CAPN5	CAPN5
CAPN6	CAPN6	CAPN6
CAPN9	CAPN9	CAPN9
CAPN9_ENST00000271971	CAPN9_ENST00000271971	CAPN9_ENST00000271971
CAPRIN2
CARD10	CARD10	CARD10
CARD14	CARD14	CARD14
CARD6	CARD6	CARD6
CARD8_ENST00000391898	CARD8_ENST00000391898	CARD8_ENST00000391898
CARM1	CARM1	CARM1
CASC1
CASC3	CASC3	CASC3
CASKIN1	CASKIN1	CASKIN1
CASKIN1_ENST00000382453	CASKIN1_ENST00000382453	CASKIN1_ENST00000382453
CASKIN2
CASQ1	CASQ1	CASQ1
CASR	CASR	CASR
CASS4	CASS4	CASS4
CASZ1
CATSPER1	CATSPER1	CATSPER1
CATSPER2	CATSPER2	CATSPER2
CATSPER4	CATSPER4	CATSPER4
CATSPERB_ENST00000256343	CATSPERB_ENST00000256343	CATSPERB_ENST00000256343
CATSPERG	CATSPERG	CATSPERG
CATSPERG_ENST00000409235	CATSPERG_ENST00000409235	CATSPERG_ENST00000409235
CBFA2T3	CBFA2T3	CBFA2T3
CBLB	CBLB	CBLB
CBLN2	CBLN2	CBLN2
CC2D1B	CC2D1B	CC2D1B
CC2D2A	CC2D2A	CC2D2A
CC2D2A_ENST00000424120	CC2D2A_ENST00000424120	CC2D2A_ENST00000424120
CCBE1	CCBE1	CCBE1
CCDC102A	CCDC102A	CCDC102A
CCDC105	CCDC105	CCDC105
CCDC108	CCDC108	CCDC108
CCDC11
CCDC110	CCDC110	CCDC110
CCDC129	CCDC129	CCDC129
CCDC129_ENST00000451887	CCDC129_ENST00000451887	CCDC129_ENST00000451887
CCDC13	CCDC13	CCDC13
CCDC135	CCDC135	CCDC135
CCDC136	CCDC136	CCDC136
CCDC136_ENST00000297788	CCDC136_ENST00000297788	CCDC136_ENST00000297788
CCDC141	CCDC141	CCDC141
CCDC141_ENST00000420890	CCDC141_ENST00000420890	CCDC141_ENST00000420890
CCDC144A	CCDC144A	CCDC144A
CCDC144A_ENST00000456009
CCDC144B
CCDC146
CCDC147	CCDC147	CCDC147
CCDC150	CCDC150	CCDC150
CCDC151	CCDC151	CCDC151
CCDC155	CCDC155	CCDC155
CCDC158	CCDC158	CCDC158
CCDC164	CCDC164	CCDC164
CCDC165	CCDC165	CCDC165
CCDC166	CCDC166	CCDC166
CCDC33	CCDC33	CCDC33
CCDC33_ENST00000321288	CCDC33_ENST00000321288	CCDC33_ENST00000321288
CCDC37	CCDC37	CCDC37
CCDC39	CCDC39	CCDC39
CCDC39_ENST00000442201	CCDC39_ENST00000442201	CCDC39_ENST00000442201
CCDC40_ENST00000269318	CCDC40_ENST00000269318	CCDC40_ENST00000269318
CCDC40_ENST00000374877	CCDC40_ENST00000374877	CCDC40_ENST00000374877
CCDC50
CCDC54	CCDC54	CCDC54
CCDC57	CCDC57	CCDC57
CCDC57_ENST00000389641	CCDC57_ENST00000389641	CCDC57_ENST00000389641
CCDC60	CCDC60	CCDC60
CCDC62	CCDC62	CCDC62
CCDC62_ENST00000253079	CCDC62_ENST00000253079	CCDC62_ENST00000253079
CCDC63	CCDC63	CCDC63
CCDC64	CCDC64	CCDC64
CCDC64B	CCDC64B	CCDC64B
CCDC71
CCDC8	CCDC8	CCDC8
CCDC81	CCDC81	CCDC81
CCDC83	CCDC83	CCDC83
CCDC85A	CCDC85A	CCDC85A
CCDC87	CCDC87	CCDC87
CCDC88B	CCDC88B	CCDC88B
CCDC88B_ENST00000359902	CCDC88B_ENST00000359902	CCDC88B_ENST00000359902
CCDC88C	CCDC88C	CCDC88C
CCDC88C_ENST00000389857	CCDC88C_ENST00000389857	CCDC88C_ENST00000389857
CCDC93
CCDC96	CCDC96	CCDC96
CCDC99	CCDC99	CCDC99
CCIN	CCIN	CCIN
CCKAR	CCKAR	CCKAR
CCM2	CCM2	CCM2
CCNA1	CCNA1	CCNA1
CCNL1	CCNL1	CCNL1
CCNL2	CCNL2	CCNL2
CCNT1	CCNT1	CCNT1
CCNT2	CCNT2	CCNT2
CCNT2_ENST00000264157	CCNT2_ENST00000264157	CCNT2_ENST00000264157
CCP110	CCP110	CCP110
CCR3	CCR3	CCR3
CCR3_ENST00000545097	CCR3_ENST00000545097	CCR3_ENST00000545097
CCR5	CCR5	CCR5
CCR9	CCR9	CCR9
CCT5	CCT5	CCT5
CCT6B
CCT8L2	CCT8L2	CCT8L2
CD101	CD101	CD101
CD163	CD163	CD163
CD163_ENST00000396620	CD163_ENST00000396620	CD163_ENST00000396620
CD163L1	CD163L1	CD163L1
CD180	CD180	CD180
CD19	CD19	CD19
CD1A	CD1A	CD1A
CD1B	CD1B	CD1B
CD1C	CD1C	CD1C
CD1E_ENST00000434258
CD2	CD2	CD2
CD200R1L	CD200R1L	CD200R1L
CD209	CD209	CD209
CD209_ENST00000315599	CD209_ENST00000315599	CD209_ENST00000315599
CD209_ENST00000601951	CD209_ENST00000601951	CD209_ENST00000601951
CD22
CD226	CD226	CD226
CD248	CD248	CD248
CD2AP	CD2AP	CD2AP
CD300LG	CD300LG	CD300LG
CD36	CD36	CD36
CD36_ENST00000433696	CD36_ENST00000433696	CD36_ENST00000433696
CD36_ENST00000435819	CD36_ENST00000435819	CD36_ENST00000435819
CD36_ENST00000447544	CD36_ENST00000447544	CD36_ENST00000447544
CD44	CD44	CD44
CD5	CD5	CD5
CD5L	CD5L	CD5L
CD6	CD6	CD6
CD6_ENST00000313421	CD6_ENST00000313421	CD6_ENST00000313421
CD84	CD84	CD84
CD84_ENST00000311224	CD84_ENST00000311224	CD84_ENST00000311224
CD86
CDC27	CDC27	CDC27
CDC27_ENST00000531206	CDC27_ENST00000531206	CDC27_ENST00000531206
CDC37	CDC37	CDC37
CDC42BPA_ENST00000366765	CDC42BPA_ENST00000366765	CDC42BPA_ENST00000366765
CDC42BPG_ENST00000342711	CDC42BPG_ENST00000342711	CDC42BPG_ENST00000342711
CDC45	CDC45	CDC45
CDC45_ENST00000437685	CDC45_ENST00000437685	CDC45_ENST00000437685
CDCA2	CDCA2	CDCA2
CDCP1	CDCP1	CDCP1
CDH10	CDH10	CDH10
CDH12	CDH12	CDH12
CDH13	CDH13	CDH13
CDH13_ENST00000268613	CDH13_ENST00000268613	CDH13_ENST00000268613
CDH15	CDH15	CDH15
CDH16	CDH16	CDH16
CDH17	CDH17	CDH17
CDH18	CDH18	CDH18
CDH18_ENST00000507958	CDH18_ENST00000507958	CDH18_ENST00000507958
CDH2	CDH2	CDH2
CDH20	CDH20	CDH20
CDH24	CDH24	CDH24
CDH24_ENST00000397359	CDH24_ENST00000397359	CDH24_ENST00000397359
CDH3_ENST00000429102
CDH4
CDH5	CDH5	CDH5
CDH6	CDH6	CDH6
CDH7	CDH7	CDH7
CDH7_ENST00000323011	CDH7_ENST00000323011	CDH7_ENST00000323011
CDH8	CDH8	CDH8
CDH9	CDH9	CDH9
CDHR1	CDHR1	CDHR1
CDHR1_ENST00000332904	CDHR1_ENST00000332904	CDHR1_ENST00000332904
CDHR2	CDHR2	CDHR2
CDHR5	CDHR5	CDHR5
CDK13	CDK13	CDK13
CDK14	CDK14	CDK14
CDK14_ENST00000380050	CDK14_ENST00000380050	CDK14_ENST00000380050
CDK5RAP1	CDK5RAP1	CDK5RAP1
CDK5RAP2	CDK5RAP2	CDK5RAP2
CDK6	CDK6	CDK6
CDKL5	CDKL5	CDKL5
CDKN2A_ENST00000361570
CDON	CDON	CDON
CDR1	CDR1	CDR1
CDS1
CDYL	CDYL	CDYL
CDYL2	CDYL2	CDYL2
CEACAM20	CEACAM20	CEACAM20
CEACAM5	CEACAM5	CEACAM5
CEACAM7	CEACAM7	CEACAM7
CEACAM8	CEACAM8	CEACAM8
CECR1	CECR1	CECR1
CECR2	CECR2	CECR2
CECR2_ENST00000262608	CECR2_ENST00000262608	CECR2_ENST00000262608
CECR5	CECR5	CECR5
CEL
CELF1	CELF1	CELF1
CELF1_ENST00000395292	CELF1_ENST00000395292	CELF1_ENST00000395292
CELF4	CELF4	CELF4
CELF6	CELF6	CELF6
CELSR2	CELSR2	CELSR2
CELSR3	CELSR3	CELSR3
CELSR3_ENST00000544264	CELSR3_ENST00000544264	CELSR3_ENST00000544264
CENPB	CENPB	CENPB
CENPF
CENPJ	CENPJ	CENPJ
CEP104	CEP104	CEP104
CEP112_ENST00000392769	CEP112_ENST00000392769	CEP112_ENST00000392769
CEP152
CEP152_ENST00000380950	CEP152_ENST00000380950	CEP152_ENST00000380950
CEP164	CEP164	CEP164
CEP192	CEP192	CEP192
CEP250	CEP250	CEP250
CEP350	CEP350	CEP350
CEP63	CEP63	CEP63
CEP68	CEP68	CEP68
CEP70
CEP78	CEP78	CEP78
CEP78_ENST00000376597	CEP78_ENST00000376597	CEP78_ENST00000376597
CEP89	CEP89	CEP89
CEP97	CEP97	CEP97
CEP97_ENST00000327230	CEP97_ENST00000327230	CEP97_ENST00000327230
CERKL	CERKL	CERKL
CERKL_ENST00000339098	CERKL_ENST00000339098	CERKL_ENST00000339098
CES1_ENST00000360526
CES3	CES3	CES3
CFB	CFB	CFB
CFH
CFHR1
CFHR2_ENST00000367415	CFHR2_ENST00000367415	CFHR2_ENST00000367415
CFHR4	CFHR4	CFHR4
CFHR5_ENST00000367414
CFTR	CFTR	CFTR
CGN	CGN	CGN
CGNL1	CGNL1	CGNL1
CHAD	CHAD	CHAD
CHAF1A	CHAF1A	CHAF1A
CHAF1B	CHAF1B	CHAF1B
CHAT	CHAT	CHAT
CHAT_ENST00000395562	CHAT_ENST00000395562	CHAT_ENST00000395562
CHD4	CHD4	CHD4
CHD4_ENST00000309577	CHD4_ENST00000309577	CHD4_ENST00000309577
CHD4_ENST00000357008	CHD4_ENST00000357008	CHD4_ENST00000357008
CHD6	CHD6	CHD6
CHD7	CHD7	CHD7
CHD9	CHD9	CHD9
CHDH	CHDH	CHDH
CHERP	CHERP	CHERP
CHGB	CHGB	CHGB
CHIA	CHIA	CHIA
CHIA_ENST00000369740	CHIA_ENST00000369740	CHIA_ENST00000369740
CHIT1	CHIT1	CHIT1
CHL1	CHL1	CHL1
CHML	CHML	CHML
CHN1	CHN1	CHN1
CHN2	CHN2	CHN2
CHN2_ENST00000539406	CHN2_ENST00000539406	CHN2_ENST00000539406
CHPF2	CHPF2	CHPF2
CHRD	CHRD	CHRD
CHRD_ENST00000342610	CHRD_ENST00000342610	CHRD_ENST00000342610
CHRM1	CHRM1	CHRM1
CHRM2	CHRM2	CHRM2
CHRM5	CHRM5	CHRM5
CHRNA1
CHRNA10	CHRNA10	CHRNA10
CHRNA5
CHRNA6	CHRNA6	CHRNA6
CHRNA9	CHRNA9	CHRNA9
CHRNB3	CHRNB3	CHRNB3
CHRND	CHRND	CHRND
CHST13	CHST13	CHST13
CHST2	CHST2	CHST2
CHST5_ENST00000541075	CHST5_ENST00000541075	CHST5_ENST00000541075
CHST6	CHST6	CHST6
CHST9	CHST9	CHST9
CHST9_ENST00000284224	CHST9_ENST00000284224	CHST9_ENST00000284224
CHSY1
CHSY3	CHSY3	CHSY3
CHTF18
CHTF18_ENST00000455171	CHTF18_ENST00000455171	CHTF18_ENST00000455171
CILP	CILP	CILP
CIR1
CIRH1A	CIRH1A	CIRH1A
CIT_ENST00000261833	CIT_ENST00000261833	CIT_ENST00000261833
CIT_ENST00000392521	CIT_ENST00000392521	CIT_ENST00000392521
CKAP2L	CKAP2L	CKAP2L
CKAP4	CKAP4	CKAP4
CKAP5	CKAP5	CKAP5
CLASP1	CLASP1	CLASP1
CLASP1_ENST00000397587	CLASP1_ENST00000397587	CLASP1_ENST00000397587
CLASP1_ENST00000455322	CLASP1_ENST00000455322	CLASP1_ENST00000455322
CLASP1_ENST00000541859	CLASP1_ENST00000541859	CLASP1_ENST00000541859
CLASP1_ENST00000545861	CLASP1_ENST00000545861	CLASP1_ENST00000545861
CLASP2	CLASP2	CLASP2
CLCA1	CLCA1	CLCA1
CLCA2	CLCA2	CLCA2
CLCN1	CLCN1	CLCN1
CLCN2	CLCN2	CLCN2
CLCN4
CLCN5	CLCN5	CLCN5
CLCN5_ENST00000376088	CLCN5_ENST00000376088	CLCN5_ENST00000376088
CLCN6	CLCN6	CLCN6
CLCNKA	CLCNKA	CLCNKA
CLCNKB	CLCNKB	CLCNKB
CLCNKB_ENST00000375667	CLCNKB_ENST00000375667	CLCNKB_ENST00000375667
CLEC14A	CLEC14A	CLEC14A
CLEC16A_ENST00000409552
CLEC3A	CLEC3A	CLEC3A
CLEC4F	CLEC4F	CLEC4F
CLEC4M	CLEC4M	CLEC4M
CLIC5_ENST00000185206	CLIC5_ENST00000185206	CLIC5_ENST00000185206
CLIC6	CLIC6	CLIC6
CLINT1
CLIP1	CLIP1	CLIP1
CLIP1_ENST00000540338
CLIP2	CLIP2	CLIP2
CLIP2_ENST00000223398	CLIP2_ENST00000223398	CLIP2_ENST00000223398
CLIP3	CLIP3	CLIP3
CLIP4	CLIP4	CLIP4
CLK1	CLK1	CLK1
CLK1_ENST00000434813	CLK1_ENST00000434813	CLK1_ENST00000434813
CLK2	CLK2	CLK2
CLK3	CLK3	CLK3
CLK3_ENST00000454830	CLK3_ENST00000454830	CLK3_ENST00000454830
CLMN	CLMN	CLMN
CLN3	CLN3	CLN3
CLP1	CLP1	CLP1
CLPB	CLPB	CLPB
CLPTM1L
CLPX	CLPX	CLPX
CLSTN1	CLSTN1	CLSTN1
CLSTN2	CLSTN2	CLSTN2
CLTCL1	CLTCL1	CLTCL1
CLTCL1_ENST00000427926	CLTCL1_ENST00000427926	CLTCL1_ENST00000427926
CLU	CLU	CLU
CLUL1	CLUL1	CLUL1
CLVS2	CLVS2	CLVS2
CMIP	CMIP	CMIP
CMKLR1	CMKLR1	CMKLR1
CMYA5	CMYA5	CMYA5
CMYA5_ENST00000446378	CMYA5_ENST00000446378	CMYA5_ENST00000446378
CNBD1	CNBD1	CNBD1
CNBD1_ENST00000518476	CNBD1_ENST00000518476	CNBD1_ENST00000518476
CNDP1	CNDP1	CNDP1
CNDP2	CNDP2	CNDP2
CNGA1	CNGA1	CNGA1
CNGA2	CNGA2	CNGA2
CNGA4	CNGA4	CNGA4
CNGB1	CNGB1	CNGB1
CNGB3
CNKSR1	CNKSR1	CNKSR1
CNKSR2	CNKSR2	CNKSR2
CNNM1	CNNM1	CNNM1
CNNM1_ENST00000356713	CNNM1_ENST00000356713	CNNM1_ENST00000356713
CNNM2_ENST00000369878	CNNM2_ENST00000369878	CNNM2_ENST00000369878
CNNM3	CNNM3	CNNM3
CNNM4	CNNM4	CNNM4
CNOT1	CNOT1	CNOT1
CNOT3	CNOT3	CNOT3
CNOT4	CNOT4	CNOT4
CNOT4_ENST00000262563	CNOT4_ENST00000262563	CNOT4_ENST00000262563
CNOT4_ENST00000315544	CNOT4_ENST00000315544	CNOT4_ENST00000315544
CNOT4_ENST00000414802
CNOT4_ENST00000541284	CNOT4_ENST00000541284	CNOT4_ENST00000541284
CNTLN_ENST00000380641	CNTLN_ENST00000380641	CNTLN_ENST00000380641
CNTN1	CNTN1	CNTN1
CNTN3	CNTN3	CNTN3
CNTN4	CNTN4	CNTN4
CNTN4_ENST00000418658	CNTN4_ENST00000418658	CNTN4_ENST00000418658
CNTN5	CNTN5	CNTN5
CNTN5_ENST00000524871	CNTN5_ENST00000524871	CNTN5_ENST00000524871
CNTNAP1	CNTNAP1	CNTNAP1
CNTNAP2	CNTNAP2	CNTNAP2
CNTNAP3
CNTNAP3_ENST00000358144
CNTNAP4	CNTNAP4	CNTNAP4
CNTNAP4_ENST00000307431	CNTNAP4_ENST00000307431	CNTNAP4_ENST00000307431
CNTNAP4_ENST00000478060	CNTNAP4_ENST00000478060	CNTNAP4_ENST00000478060
CNTNAP5	CNTNAP5	CNTNAP5
CNTRL_ENST00000373851	CNTRL_ENST00000373851	CNTRL_ENST00000373851
COASY	COASY	COASY
COCH
COG1	COG1	COG1
COG4	COG4	COG4
COG5	COG5	COG5
COG6	COG6	COG6
COG6_ENST00000416691	COG6_ENST00000416691	COG6_ENST00000416691
COG7	COG7	COG7
COL11A2	COL11A2	COL11A2
COL12A1	COL12A1	COL12A1
COL13A1	COL13A1	COL13A1
COL13A1_ENST00000356340	COL13A1_ENST00000356340	COL13A1_ENST00000356340
COL13A1_ENST00000398972	COL13A1_ENST00000398972	COL13A1_ENST00000398972
COL13A1_ENST00000398978	COL13A1_ENST00000398978	COL13A1_ENST00000398978
COL14A1	COL14A1	COL14A1
COL15A1	COL15A1	COL15A1
COL16A1	COL16A1	COL16A1
COL16A1_ENST00000271069	COL16A1_ENST00000271069	COL16A1_ENST00000271069
COL17A1	COL17A1	COL17A1
COL1A1	COL1A1	COL1A1
COL1A2	COL1A2	COL1A2
COL21A1	COL21A1	COL21A1
COL22A1	COL22A1	COL22A1
COL24A1	COL24A1	COL24A1
COL25A1	COL25A1	COL25A1
COL25A1_ENST00000399126	COL25A1_ENST00000399126	COL25A1_ENST00000399126
COL27A1	COL27A1	COL27A1
COL2A1	COL2A1	COL2A1
COL2A1_ENST00000380518	COL2A1_ENST00000380518	COL2A1_ENST00000380518
COL3A1_ENST00000317840	COL3A1_ENST00000317840	COL3A1_ENST00000317840
COL4A1	COL4A1	COL4A1
COL4A1_ENST00000375815	COL4A1_ENST00000375815	COL4A1_ENST00000375815
COL4A2	COL4A2	COL4A2
COL4A3_ENST00000328380	COL4A3_ENST00000328380	COL4A3_ENST00000328380
COL4A3BP	COL4A3BP	COL4A3BP
COL4A5	COL4A5	COL4A5
COL4A5_ENST00000328300	COL4A5_ENST00000328300	COL4A5_ENST00000328300
COL4A6	COL4A6	COL4A6
COL4A6_ENST00000394872	COL4A6_ENST00000394872	COL4A6_ENST00000394872
COL5A1	COL5A1	COL5A1
COL5A3	COL5A3	COL5A3
COL6A1
COL6A2	COL6A2	COL6A2
COL6A2_ENST00000310645	COL6A2_ENST00000310645	COL6A2_ENST00000310645
COL6A2_ENST00000357838	COL6A2_ENST00000357838	COL6A2_ENST00000357838
COL6A3	COL6A3	COL6A3
COL6A5	COL6A5	COL6A5
COL6A6	COL6A6	COL6A6
COL6A6_ENST00000358511	COL6A6_ENST00000358511	COL6A6_ENST00000358511
COL7A1	COL7A1	COL7A1
COL8A1
COL8A2	COL8A2	COL8A2
COL9A1	COL9A1	COL9A1
COL9A1_ENST00000370499	COL9A1_ENST00000370499	COL9A1_ENST00000370499
COL9A3	COL9A3	COL9A3
COLEC12	COLEC12	COLEC12
COMP	COMP	COMP
COPA	COPA	COPA
COPA_ENST00000368069	COPA_ENST00000368069	COPA_ENST00000368069
COPB1	COPB1	COPB1
CORIN	CORIN	CORIN
CORO1C	CORO1C	CORO1C
CORO2A	CORO2A	CORO2A
CORO2B	CORO2B	CORO2B
CORO6	CORO6	CORO6
CORO7	CORO7	CORO7
COX10	COX10	COX10
CP
CPA2	CPA2	CPA2
CPA3	CPA3	CPA3
CPA4	CPA4	CPA4
CPA6
CPAMD8	CPAMD8	CPAMD8
CPB1	CPB1	CPB1
CPD
CPE	CPE	CPE
CPEB3	CPEB3	CPEB3
CPEB3_ENST00000394210	CPEB3_ENST00000394210	CPEB3_ENST00000394210
CPEB4	CPEB4	CPEB4
CPN1	CPN1	CPN1
CPNE3
CPNE4	CPNE4	CPNE4
CPNE6	CPNE6	CPNE6
CPNE6_ENST00000537691	CPNE6_ENST00000537691	CPNE6_ENST00000537691
CPNE8	CPNE8	CPNE8
CPNE9	CPNE9	CPNE9
CPS1	CPS1	CPS1
CPS1_ENST00000430249	CPS1_ENST00000430249	CPS1_ENST00000430249
CPSF2	CPSF2	CPSF2
CPT1A	CPT1A	CPT1A
CPT1A_ENST00000376618	CPT1A_ENST00000376618	CPT1A_ENST00000376618
CPT1B	CPT1B	CPT1B
CPT1C	CPT1C	CPT1C
CPXM1	CPXM1	CPXM1
CPXM2	CPXM2	CPXM2
CPZ	CPZ	CPZ
CR1_ENST00000367049
CR1L	CR1L	CR1L
CR1L_ENST00000508064	CR1L_ENST00000508064	CR1L_ENST00000508064
CRAT	CRAT	CRAT
CRB1	CRB1	CRB1
CRB1_ENST00000535699	CRB1_ENST00000535699	CRB1_ENST00000535699
CRB2	CRB2	CRB2
CRB2_ENST00000359999	CRB2_ENST00000359999	CRB2_ENST00000359999
CREB3L2_ENST00000456390	CREB3L2_ENST00000456390	CREB3L2_ENST00000456390
CREB3L3	CREB3L3	CREB3L3
CREB5	CREB5	CREB5
CREB5_ENST00000396298	CREB5_ENST00000396298	CREB5_ENST00000396298
CRHBP
CRHR1	CRHR1	CRHR1
CRIM1	CRIM1	CRIM1
CRIPAK	CRIPAK	CRIPAK
CRISP3	CRISP3	CRISP3
CRISP3_ENST00000433368	CRISP3_ENST00000433368	CRISP3_ENST00000433368
CRNKL1	CRNKL1	CRNKL1
CRNN
CROCC	CROCC	CROCC
CRSP3	CRSP3	CRSP3
CRX	CRX	CRX
CRY1
CRY2	CRY2	CRY2
CRY2_ENST00000443527	CRY2_ENST00000443527	CRY2_ENST00000443527
CRYBB1	CRYBB1	CRYBB1
CTAGE1	CTAGE1	CTAGE1
CTAGE1_ENST00000391403	CTAGE1_ENST00000391403	CTAGE1_ENST00000391403
CTAGE5	CTAGE5	CTAGE5
CTAGE5_ENST00000341502	CTAGE5_ENST00000341502	CTAGE5_ENST00000341502
CTAGE5_ENST00000341749	CTAGE5_ENST00000341749	CTAGE5_ENST00000341749
CTBP1	CTBP1	CTBP1
CTC1	CTC1	CTC1
CTCFL	CTCFL	CTCFL
CTCFL_ENST00000423479	CTCFL_ENST00000423479	CTCFL_ENST00000423479
CTCFL_ENST00000426658	CTCFL_ENST00000426658	CTCFL_ENST00000426658
CTIF	CTIF	CTIF
CTIF_ENST00000420275	CTIF_ENST00000420275	CTIF_ENST00000420275
CTNNA1	CTNNA1	CTNNA1
CTNNA2_ENST00000361291	CTNNA2_ENST00000361291	CTNNA2_ENST00000361291
CTNNA2_ENST00000466387	CTNNA2_ENST00000466387	CTNNA2_ENST00000466387
CTNNA3	CTNNA3	CTNNA3
CTNNA3_ENST00000433211	CTNNA3_ENST00000433211	CTNNA3_ENST00000433211
CTNNA3_ENST00000545309	CTNNA3_ENST00000545309	CTNNA3_ENST00000545309
CTPS2	CTPS2	CTPS2
CTSD	CTSD	CTSD
CTSE	CTSE	CTSE
CTTNBP2	CTTNBP2	CTTNBP2
CUBN	CUBN	CUBN
CUL7	CUL7	CUL7
CUL7_ENST00000535468	CUL7_ENST00000535468	CUL7_ENST00000535468
CUL9	CUL9	CUL9
CUX1_ENST00000292538
CUX2	CUX2	CUX2
CUZD1	CUZD1	CUZD1
CWC22	CWC22	CWC22
CWH43	CWH43	CWH43
CXCR4
CXCR4_ENST00000241393	CXCR4_ENST00000241393	CXCR4_ENST00000241393
CXorf22	CXorf22	CXorf22
CXorf23_ENST00000379687	CXorf23_ENST00000379687	CXorf23_ENST00000379687
CXorf36_ENST00000398000	CXorf36_ENST00000398000	CXorf36_ENST00000398000
CXorf57	CXorf57	CXorf57
CXorf59	CXorf59	CXorf59
CXorf66	CXorf66	CXorf66
CXorf67	CXorf67	CXorf67
CXorf67_ENST00000342995	CXorf67_ENST00000342995	CXorf67_ENST00000342995
CYLC2	CYLC2	CYLC2
CYP11A1	CYP11A1	CYP11A1
CYP11B1
CYP11B2	CYP11B2	CYP11B2
CYP19A1	CYP19A1	CYP19A1
CYP1A1	CYP1A1	CYP1A1
CYP1A2	CYP1A2	CYP1A2
CYP24A1	CYP24A1	CYP24A1
CYP26A1	CYP26A1	CYP26A1
CYP26A1_ENST00000224356	CYP26A1_ENST00000224356	CYP26A1_ENST00000224356
CYP26B1	CYP26B1	CYP26B1
CYP26C1	CYP26C1	CYP26C1
CYP27C1	CYP27C1	CYP27C1
CYP2A13	CYP2A13	CYP2A13
CYP2B6	CYP2B6	CYP2B6
CYP2C18	CYP2C18	CYP2C18
CYP2C19	CYP2C19	CYP2C19
CYP2C8_ENST00000535898	CYP2C8_ENST00000535898	CYP2C8_ENST00000535898
CYP2C8_ENST00000539050	CYP2C8_ENST00000539050	CYP2C8_ENST00000539050
CYP2C9	CYP2C9	CYP2C9
CYP2D6_ENST00000360608	CYP2D6_ENST00000360608	CYP2D6_ENST00000360608
CYP2E1	CYP2E1	CYP2E1
CYP3A5	CYP3A5	CYP3A5
CYP3A5_ENST00000343703	CYP3A5_ENST00000343703	CYP3A5_ENST00000343703
CYP46A1
CYP4A11	CYP4A11	CYP4A11
CYP4A22	CYP4A22	CYP4A22
CYP4F22	CYP4F22	CYP4F22
CYP4F3	CYP4F3	CYP4F3
CYP4F3_ENST00000585846	CYP4F3_ENST00000585846	CYP4F3_ENST00000585846
CYP4X1	CYP4X1	CYP4X1
CYP4Z1
CYP8B1	CYP8B1	CYP8B1
CYSLTR1	CYSLTR1	CYSLTR1
CYTH3	CYTH3	CYTH3
CYTIP	CYTIP	CYTIP
CSAD	CSAD	CSAD
CSAD_ENST00000267085	CSAD_ENST00000267085	CSAD_ENST00000267085
CSE1L	CSE1L	CSE1L
CSF1_ENST00000329608
CSF2RA	CSF2RA	CSF2RA
CSF2RB	CSF2RB	CSF2RB
CSGALNACT1	CSGALNACT1	CSGALNACT1
CSGALNACT2	CSGALNACT2	CSGALNACT2
CSK_ENST00000220003	CSK_ENST00000220003	CSK_ENST00000220003
CSMD1_ENST00000318252	CSMD1_ENST00000318252	CSMD1_ENST00000318252
CSMD1_ENST00000537824	CSMD1_ENST00000537824	CSMD1_ENST00000537824
CSMD1_ENST00000539096	CSMD1_ENST00000539096	CSMD1_ENST00000539096
CSMD2	CSMD2	CSMD2
CSMD2_ENST00000338325	CSMD2_ENST00000338325	CSMD2_ENST00000338325
CSMD2_ENST00000373380	CSMD2_ENST00000373380	CSMD2_ENST00000373380
CSMD2_ENST00000373381	CSMD2_ENST00000373381	CSMD2_ENST00000373381
CSMD2_ENST00000373388	CSMD2_ENST00000373388	CSMD2_ENST00000373388
CSMD3
CSMD3_ENST00000343508	CSMD3_ENST00000343508	CSMD3_ENST00000343508
CSNK1A1L	CSNK1A1L	CSNK1A1L
CSNK1G2	CSNK1G2	CSNK1G2
CSPG4	CSPG4	CSPG4
CSPG5	CSPG5	CSPG5
CSPG5_ENST00000383738	CSPG5_ENST00000383738	CSPG5_ENST00000383738
CSRNP1	CSRNP1	CSRNP1
CSRNP3	CSRNP3	CSRNP3
CSRP2BP	CSRP2BP	CSRP2BP
CSTF1
CSTF2	CSTF2	CSTF2
CSTF2T	CSTF2T	CSTF2T
D2HGDH	D2HGDH	D2HGDH
DAAM1	DAAM1	DAAM1
DAAM2	DAAM2	DAAM2
DAAM2_ENST00000398904	DAAM2_ENST00000398904	DAAM2_ENST00000398904
DAB1	DAB1	DAB1
DAB1_ENST00000371231	DAB1_ENST00000371231	DAB1_ENST00000371231
DAB2	DAB2	DAB2
DAB2IP	DAB2IP	DAB2IP
DACT1	DACT1	DACT1
DACT2_ENST00000366795	DACT2_ENST00000366795	DACT2_ENST00000366795
DAG1	DAG1	DAG1
DAPK1	DAPK1	DAPK1
DAPK1_ENST00000408954	DAPK1_ENST00000408954	DAPK1_ENST00000408954
DAPK1_ENST00000469640	DAPK1_ENST00000469640	DAPK1_ENST00000469640
DARC_ENST00000368121	DARC_ENST00000368121	DARC_ENST00000368121
DBC1	DBC1	DBC1
DBC1_ENST00000373964	DBC1_ENST00000373964	DBC1_ENST00000373964
DBF4	DBF4	DBF4
DBH
DBN1_ENST00000292385
DBX2	DBX2	DBX2
DCAF12L2	DCAF12L2	DCAF12L2
DCAF13	DCAF13	DCAF13
DCAF4	DCAF4	DCAF4
DCAF4L1	DCAF4L1	DCAF4L1
DCAF4L2	DCAF4L2	DCAF4L2
DCAF5	DCAF5	DCAF5
DCAF6	DCAF6	DCAF6
DCAF6_ENST00000367840	DCAF6_ENST00000367840	DCAF6_ENST00000367840
DCAF8L1	DCAF8L1	DCAF8L1
DCAF8L2	DCAF8L2	DCAF8L2
DCBLD1	DCBLD1	DCBLD1
DCBLD2	DCBLD2	DCBLD2
DCC	DCC	DCC
DCC_ENST00000412726	DCC_ENST00000412726	DCC_ENST00000412726
DCDC1	DCDC1	DCDC1
DCDC2	DCDC2	DCDC2
DCDC5_ENST00000339794	DCDC5_ENST00000339794	DCDC5_ENST00000339794
DCHS1	DCHS1	DCHS1
DCHS2	DCHS2	DCHS2
DCHS2_ENST00000339452	DCHS2_ENST00000339452	DCHS2_ENST00000339452
DCHS2_ENST00000443500	DCHS2_ENST00000443500	DCHS2_ENST00000443500
DCLK1	DCLK1	DCLK1
DCLK1_ENST00000255448	DCLK1_ENST00000255448	DCLK1_ENST00000255448
DCLK1_ENST00000379892	DCLK1_ENST00000379892	DCLK1_ENST00000379892
DCLK1_ENST00000379893	DCLK1_ENST00000379893	DCLK1_ENST00000379893
DCLK2	DCLK2	DCLK2
DCLK2_ENST00000302176	DCLK2_ENST00000302176	DCLK2_ENST00000302176
DCLRE1B	DCLRE1B	DCLRE1B
DCN	DCN	DCN
DCP1B	DCP1B	DCP1B
DCT_ENST00000446125	DCT_ENST00000446125	DCT_ENST00000446125
DCTN1	DCTN1	DCTN1
DCX	DCX	DCX
DCX_ENST00000356915	DCX_ENST00000356915	DCX_ENST00000356915
DCST2	DCST2	DCST2
DDB1	DDB1	DDB1
DDHD1	DDHD1	DDHD1
DDHD1_ENST00000323669	DDHD1_ENST00000323669	DDHD1_ENST00000323669
DDI1	DDI1	DDI1
DDI1_ENST00000302259	DDI1_ENST00000302259	DDI1_ENST00000302259
DDN	DDN	DDN
DDN_ENST00000421952	DDN_ENST00000421952	DDN_ENST00000421952
DDR1	DDR1	DDR1
DDR1_ENST00000324771	DDR1_ENST00000324771	DDR1_ENST00000324771
DDR1_ENST00000376575	DDR1_ENST00000376575	DDR1_ENST00000376575
DDX1	DDX1	DDX1
DDX10	DDX10	DDX10
DDX11	DDX11	DDX11
DDX24	DDX24	DDX24
DDX31	DDX31	DDX31
DDX31_ENST00000372155	DDX31_ENST00000372155	DDX31_ENST00000372155
DDX41_ENST00000507955	DDX41_ENST00000507955	DDX41_ENST00000507955
DDX42	DDX42	DDX42
DDX46
DDX5	DDX5	DDX5
DDX5_ENST00000540698	DDX5_ENST00000540698	DDX5_ENST00000540698
DDX53	DDX53	DDX53
DDX55	DDX55	DDX55
DDX58	DDX58	DDX58
DDX59_ENST00000331314	DDX59_ENST00000331314	DDX59_ENST00000331314
DDX60	DDX60	DDX60
DDX60_ENST00000393743	DDX60_ENST00000393743	DDX60_ENST00000393743
DDX60L	DDX60L	DDX60L
DDX60L_ENST00000505890	DDX60L_ENST00000505890	DDX60L_ENST00000505890
DEF6	DEF6	DEF6
DEF8	DEF8	DEF8
DENND1A	DENND1A	DENND1A
DENND1A_ENST00000394219	DENND1A_ENST00000394219	DENND1A_ENST00000394219
DENND2A	DENND2A	DENND2A
DENND2C
DENND2C_ENST00000393274
DENND3	DENND3	DENND3
DENND4B	DENND4B	DENND4B
DENND4B_ENST00000361217	DENND4B_ENST00000361217	DENND4B_ENST00000361217
DENND5A	DENND5A	DENND5A
DENND5B	DENND5B	DENND5B
DENND5B_ENST00000306833	DENND5B_ENST00000306833	DENND5B_ENST00000306833
DENND5B_ENST00000354285	DENND5B_ENST00000354285	DENND5B_ENST00000354285
DEPDC1B	DEPDC1B	DEPDC1B
DEPDC5	DEPDC5	DEPDC5
DEPDC5_ENST00000400246	DEPDC5_ENST00000400246	DEPDC5_ENST00000400246
DEPDC5_ENST00000535622	DEPDC5_ENST00000535622	DEPDC5_ENST00000535622
DEPDC5_ENST00000536766	DEPDC5_ENST00000536766	DEPDC5_ENST00000536766
DES	DES	DES
DET1	DET1	DET1
DGCR14
DGKA	DGKA	DGKA
DGKB	DGKB	DGKB
DGKB_ENST00000258767	DGKB_ENST00000258767	DGKB_ENST00000258767
DGKD	DGKD	DGKD
DGKG	DGKG	DGKG
DGKH	DGKH	DGKH
DGKH_ENST00000379274	DGKH_ENST00000379274	DGKH_ENST00000379274
DGKI	DGKI	DGKI
DGKI_ENST00000288490	DGKI_ENST00000288490	DGKI_ENST00000288490
DGKI_ENST00000424189	DGKI_ENST00000424189	DGKI_ENST00000424189
DGKK	DGKK	DGKK
DGKQ	DGKQ	DGKQ
DGKZ	DGKZ	DGKZ
DGKZ_ENST00000395574	DGKZ_ENST00000395574	DGKZ_ENST00000395574
DGKZ_ENST00000421244	DGKZ_ENST00000421244	DGKZ_ENST00000421244
DGKZ_ENST00000454345	DGKZ_ENST00000454345	DGKZ_ENST00000454345
DHDH	DHDH	DHDH
DHRS7C	DHRS7C	DHRS7C
DHTKD1	DHTKD1	DHTKD1
DHX30	DHX30	DHX30
DHX32	DHX32	DHX32
DHX34	DHX34	DHX34
DHX36	DHX36	DHX36
DHX36_ENST00000544526	DHX36_ENST00000544526	DHX36_ENST00000544526
DHX37	DHX37	DHX37
DHX38	DHX38	DHX38
DHX40
DHX57	DHX57	DHX57
DHX58	DHX58	DHX58
DHX8
DHX9	DHX9	DHX9
DIAPH2	DIAPH2	DIAPH2
DIAPH2_ENST00000373049	DIAPH2_ENST00000373049	DIAPH2_ENST00000373049
DIDO1	DIDO1	DIDO1
DIDO1_ENST00000370366	DIDO1_ENST00000370366	DIDO1_ENST00000370366
DIDO1_ENST00000395335	DIDO1_ENST00000395335	DIDO1_ENST00000395335
DIEXF	DIEXF	DIEXF
DIP2A	DIP2A	DIP2A
DIP2A_ENST00000417564	DIP2A_ENST00000417564	DIP2A_ENST00000417564
DIP2A_ENST00000427143	DIP2A_ENST00000427143	DIP2A_ENST00000427143
DIP2B	DIP2B	DIP2B
DIP2C	DIP2C	DIP2C
DIRC2	DIRC2	DIRC2
DIS3L2	DIS3L2	DIS3L2
DIS3L2_ENST00000273009	DIS3L2_ENST00000273009	DIS3L2_ENST00000273009
DISC1_ENST00000366633	DISC1_ENST00000366633	DISC1_ENST00000366633
DISC1_ENST00000366636	DISC1_ENST00000366636	DISC1_ENST00000366636
DISC1_ENST00000366638	DISC1_ENST00000366638	DISC1_ENST00000366638
DISP1	DISP1	DISP1
DISP2	DISP2	DISP2
DIXDC1	DIXDC1	DIXDC1
DKK2
DLC1	DLC1	DLC1
DLEC1	DLEC1	DLEC1
DLEC1_ENST00000346219	DLEC1_ENST00000346219	DLEC1_ENST00000346219
DLG2	DLG2	DLG2
DLG2_ENST00000280241	DLG2_ENST00000280241	DLG2_ENST00000280241
DLG2_ENST00000376104	DLG2_ENST00000376104	DLG2_ENST00000376104
DLG2_ENST00000418306	DLG2_ENST00000418306	DLG2_ENST00000418306
DLG2_ENST00000537455	DLG2_ENST00000537455	DLG2_ENST00000537455
DLG4	DLG4	DLG4
DLG4_ENST00000302955	DLG4_ENST00000302955	DLG4_ENST00000302955
DLG5	DLG5	DLG5
DLGAP1_ENST00000534970	DLGAP1_ENST00000534970	DLGAP1_ENST00000534970
DLGAP1_ENST00000539435	DLGAP1_ENST00000539435	DLGAP1_ENST00000539435
DLGAP1_ENST00000581699	DLGAP1_ENST00000581699	DLGAP1_ENST00000581699
DLGAP2	DLGAP2	DLGAP2
DLGAP3	DLGAP3	DLGAP3
DLGAP4	DLGAP4	DLGAP4
DLGAP5	DLGAP5	DLGAP5
DLL3	DLL3	DLL3
DLL3_ENST00000356433	DLL3_ENST00000356433	DLL3_ENST00000356433
DLL4_ENST00000249749	DLL4_ENST00000249749	DLL4_ENST00000249749
DMBT1	DMBT1	DMBT1
DMBT1_ENST00000368909	DMBT1_ENST00000368909	DMBT1_ENST00000368909
DMBT1_ENST00000368915	DMBT1_ENST00000368915	DMBT1_ENST00000368915
DMD	DMD	DMD
DMD_ENST00000357033
DMD_ENST00000378677
DMD_ENST00000378723	DMD_ENST00000378723	DMD_ENST00000378723
DMGDH	DMGDH	DMGDH
DMGDH_ENST00000380311	DMGDH_ENST00000380311	DMGDH_ENST00000380311
DMKN	DMKN	DMKN
DMKN_ENST00000419602
DMKN_ENST00000424570	DMKN_ENST00000424570	DMKN_ENST00000424570
DMKN_ENST00000429837
DMP1	DMP1	DMP1
DMPK_ENST00000343373
DMRT2_ENST00000302441	DMRT2_ENST00000302441	DMRT2_ENST00000302441
DMRTA1
DMRTC2	DMRTC2	DMRTC2
DMTF1
DMWD
DMXL1	DMXL1	DMXL1
DMXL1_ENST00000539542
DNA2L	DNA2L	DNA2L
DNAAF3_ENST00000527223	DNAAF3_ENST00000527223	DNAAF3_ENST00000527223
DNAH1	DNAH1	DNAH1
DNAH1_ENST00000420323	DNAH1_ENST00000420323	DNAH1_ENST00000420323
DNAH10
DNAH10_ENST00000409039	DNAH10_ENST00000409039	DNAH10_ENST00000409039
DNAH10_same_name	DNAH10_same_name	DNAH10_same_name
DNAH11	DNAH11	DNAH11
DNAH11_ENST00000328843	DNAH11_ENST00000328843	DNAH11_ENST00000328843
DNAH12	DNAH12	DNAH12
DNAH14	DNAH14	DNAH14
DNAH14_ENST00000430092	DNAH14_ENST00000430092	DNAH14_ENST00000430092
DNAH2	DNAH2	DNAH2
DNAH3	DNAH3	DNAH3
DNAH3_ENST00000261383	DNAH3_ENST00000261383	DNAH3_ENST00000261383
DNAH5	DNAH5	DNAH5
DNAH6	DNAH6	DNAH6
DNAH7	DNAH7	DNAH7
DNAH8	DNAH8	DNAH8
DNAH8_ENST00000359357	DNAH8_ENST00000359357	DNAH8_ENST00000359357
DNAH8_ENST00000449981	DNAH8_ENST00000449981	DNAH8_ENST00000449981
DNAH9	DNAH9	DNAH9
DNAI2	DNAI2	DNAI2
DNAJB5_ENST00000453597
DNAJB8	DNAJB8	DNAJB8
DNAJC10	DNAJC10	DNAJC10
DNAJC13	DNAJC13	DNAJC13
DNAJC13_ENST00000260818	DNAJC13_ENST00000260818	DNAJC13_ENST00000260818
DNAJC14
DNAJC16	DNAJC16	DNAJC16
DNAJC5B	DNAJC5B	DNAJC5B
DNAJC6	DNAJC6	DNAJC6
DNAJC6_ENST00000371069	DNAJC6_ENST00000371069	DNAJC6_ENST00000371069
DNAPTP6	DNAPTP6	DNAPTP6
DNER	DNER	DNER
DNHD1	DNHD1	DNHD1
DNM3	DNM3	DNM3
DNMBP	DNMBP	DNMBP
DNMBP_ENST00000342239	DNMBP_ENST00000342239	DNMBP_ENST00000342239
DNMT3L	DNMT3L	DNMT3L
DNTT	DNTT	DNTT
DNTTIP2
DOC2A	DOC2A	DOC2A
DOCK1	DOCK1	DOCK1
DOCK1_ENST00000280333	DOCK1_ENST00000280333	DOCK1_ENST00000280333
DOCK10	DOCK10	DOCK10
DOCK10_ENST00000373702	DOCK10_ENST00000373702	DOCK10_ENST00000373702
DOCK10_ENST00000409592	DOCK10_ENST00000409592	DOCK10_ENST00000409592
DOCK2	DOCK2	DOCK2
DOCK4	DOCK4	DOCK4
DOCK4_ENST00000437633	DOCK4_ENST00000437633	DOCK4_ENST00000437633
DOCK4_ENST00000494651	DOCK4_ENST00000494651	DOCK4_ENST00000494651
DOCK5	DOCK5	DOCK5
DOCK6	DOCK6	DOCK6
DOCK7_ENST00000251157	DOCK7_ENST00000251157	DOCK7_ENST00000251157
DOCK8	DOCK8	DOCK8
DOCK8_ENST00000453981	DOCK8_ENST00000453981	DOCK8_ENST00000453981
DOCK9	DOCK9	DOCK9
DOCK9_ENST00000339416	DOCK9_ENST00000339416	DOCK9_ENST00000339416
DOCK9_ENST00000376460	DOCK9_ENST00000376460	DOCK9_ENST00000376460
DOCK9_ENST00000442173	DOCK9_ENST00000442173	DOCK9_ENST00000442173
DOCK9_ENST00000448493	DOCK9_ENST00000448493	DOCK9_ENST00000448493
DOK1	DOK1	DOK1
DOK2	DOK2	DOK2
DOK3	DOK3	DOK3
DOK5	DOK5	DOK5
DOPEY1_ENST00000237163	DOPEY1_ENST00000237163	DOPEY1_ENST00000237163
DOPEY2	DOPEY2	DOPEY2
DOT1L	DOT1L	DOT1L
DPEP3	DPEP3	DPEP3
DPF1	DPF1	DPF1
DPF1_ENST00000437720	DPF1_ENST00000437720	DPF1_ENST00000437720
DPF2	DPF2	DPF2
DPF3	DPF3	DPF3
DPF3_ENST00000541685	DPF3_ENST00000541685	DPF3_ENST00000541685
DPP10	DPP10	DPP10
DPP10_ENST00000393147
DPP10_ENST00000410059	DPP10_ENST00000410059	DPP10_ENST00000410059
DPP4	DPP4	DPP4
DPP6	DPP6	DPP6
DPP6_ENST00000332007	DPP6_ENST00000332007	DPP6_ENST00000332007
DPP6_ENST00000377770	DPP6_ENST00000377770	DPP6_ENST00000377770
DPP7	DPP7	DPP7
DPP8	DPP8	DPP8
DPP8_ENST00000341861	DPP8_ENST00000341861	DPP8_ENST00000341861
DPPA2	DPPA2	DPPA2
DPPA4	DPPA4	DPPA4
DPY19L2	DPY19L2	DPY19L2
DPY19L4	DPY19L4	DPY19L4
DPYS	DPYS	DPYS
DPYSL2	DPYSL2	DPYSL2
DPYSL3	DPYSL3	DPYSL3
DQX1_ENST00000404568
DRP2	DRP2	DRP2
DSC1	DSC1	DSC1
DSC1_ENST00000257198	DSC1_ENST00000257198	DSC1_ENST00000257198
DSC3	DSC3	DSC3
DSC3_ENST00000434452	DSC3_ENST00000434452	DSC3_ENST00000434452
DSCAM	DSCAM	DSCAM
DSCAML1	DSCAML1	DSCAML1
DSE	DSE	DSE
DSE_ENST00000537543	DSE_ENST00000537543	DSE_ENST00000537543
DSEL	DSEL	DSEL
DSG1	DSG1	DSG1
DSG2
DSG4	DSG4	DSG4
DSG4_ENST00000359747	DSG4_ENST00000359747	DSG4_ENST00000359747
DSP	DSP	DSP
DST	DST	DST
DST_ENST00000244364	DST_ENST00000244364	DST_ENST00000244364
DST_ENST00000370754	DST_ENST00000370754	DST_ENST00000370754
DST_ENST00000370765	DST_ENST00000370765	DST_ENST00000370765
DST_ENST00000370769	DST_ENST00000370769	DST_ENST00000370769
DSTYK_ENST00000367162	DSTYK_ENST00000367162	DSTYK_ENST00000367162
DTL
DTNA_ENST00000269190	DTNA_ENST00000269190	DTNA_ENST00000269190
DTNA_ENST00000269191	DTNA_ENST00000269191	DTNA_ENST00000269191
DTNA_ENST00000315456	DTNA_ENST00000315456	DTNA_ENST00000315456
DTNA_ENST00000399121	DTNA_ENST00000399121	DTNA_ENST00000399121
DTNA_ENST00000444659	DTNA_ENST00000444659	DTNA_ENST00000444659
DTNB
DTNB_ENST00000288642	DTNB_ENST00000288642	DTNB_ENST00000288642
DTX1	DTX1	DTX1
DTX3	DTX3	DTX3
DTX3L	DTX3L	DTX3L
DUOX1	DUOX1	DUOX1
DUOX1_ENST00000561166	DUOX1_ENST00000561166	DUOX1_ENST00000561166
DUOX2	DUOX2	DUOX2
DUOXA1	DUOXA1	DUOXA1
DUS1L	DUS1L	DUS1L
DUS3L	DUS3L	DUS3L
DUSP27	DUSP27	DUSP27
DVL1	DVL1	DVL1
DVL3
DYM
DYNC1H1	DYNC1H1	DYNC1H1
DYNC1I1	DYNC1I1	DYNC1I1
DYNC2H1
DYNC2H1_ENST00000398093
DYRK1B	DYRK1B	DYRK1B
DYRK1B_ENST00000593685	DYRK1B_ENST00000593685	DYRK1B_ENST00000593685
DYRK2	DYRK2	DYRK2
DYRK4
DYSF	DYSF	DYSF
DYSF_ENST00000410020
DYTN	DYTN	DYTN
DYTN_ENST00000452335	DYTN_ENST00000452335	DYTN_ENST00000452335
DZIP1	DZIP1	DZIP1
DZIP1_ENST00000347108	DZIP1_ENST00000347108	DZIP1_ENST00000347108
DZIP1L	DZIP1L	DZIP1L
DZIP1L_ENST00000469243	DZIP1L_ENST00000469243	DZIP1L_ENST00000469243
DZIP3	DZIP3	DZIP3
E2F3	E2F3	E2F3
E2F7	E2F7	E2F7
E2F7_ENST00000322886	E2F7_ENST00000322886	E2F7_ENST00000322886
E2F8	E2F8	E2F8
EBF1	EBF1	EBF1
EBF2	EBF2	EBF2
EBF2_ENST00000520164	EBF2_ENST00000520164	EBF2_ENST00000520164
ECE1	ECE1	ECE1
ECE1_ENST00000264205	ECE1_ENST00000264205	ECE1_ENST00000264205
ECE1_ENST00000357071	ECE1_ENST00000357071	ECE1_ENST00000357071
ECE2_ENST00000402825	ECE2_ENST00000402825	ECE2_ENST00000402825
ECEL1	ECEL1	ECEL1
ECM1	ECM1	ECM1
ECM1_ENST00000369049	ECM1_ENST00000369049	ECM1_ENST00000369049
ECM2
ECT2L	ECT2L	ECT2L
EDA2R_ENST00000450752	EDA2R_ENST00000450752	EDA2R_ENST00000450752
EDAR	EDAR	EDAR
EDAR_ENST00000409271	EDAR_ENST00000409271	EDAR_ENST00000409271
EDC4	EDC4	EDC4
EDEM1	EDEM1	EDEM1
EDEM2	EDEM2	EDEM2
EDEM3	EDEM3	EDEM3
EDEM3_ENST00000318130	EDEM3_ENST00000318130	EDEM3_ENST00000318130
EDN3	EDN3	EDN3
EDN3_ENST00000337938	EDN3_ENST00000337938	EDN3_ENST00000337938
EDNRA	EDNRA	EDNRA
EDNRB	EDNRB	EDNRB
EDNRB_ENST00000377211	EDNRB_ENST00000377211	EDNRB_ENST00000377211
EDNRB_ENST00000446573
EEF2K	EEF2K	EEF2K
EEF2K_ENST00000263026	EEF2K_ENST00000263026	EEF2K_ENST00000263026
EEFSEC	EEFSEC	EEFSEC
EEPD1	EEPD1	EEPD1
EFCAB3	EFCAB3	EFCAB3
EFCAB3_ENST00000450662	EFCAB3_ENST00000450662	EFCAB3_ENST00000450662
EFCAB4B	EFCAB4B	EFCAB4B
EFCAB4B_ENST00000440314	EFCAB4B_ENST00000440314	EFCAB4B_ENST00000440314
EFCAB4B_ENST00000444507	EFCAB4B_ENST00000444507	EFCAB4B_ENST00000444507
EFCAB5	EFCAB5	EFCAB5
EFCAB6	EFCAB6	EFCAB6
EFEMP1
EFHC2	EFHC2	EFHC2
[truncated: 6,371 more rows]

## Sheet: PG_SOr2-PG_SSIr2
PG_SSIr2_1SD	PG_SOr2_1SD	in both lists			Number of transcripts	%
JUN	JUN	JUN		PG_SSIr2_1SD	9412	93.6358
A1BG	A1BG	A1BG		PG_SOr2_1SD	9059	97.2845
A1CF	A1CF	A1CF		in both lists	8813
A1CF_ENST00000282641	A1CF_ENST00000282641	A1CF_ENST00000282641
A1CF_ENST00000373995	A1CF_ENST00000373995	A1CF_ENST00000373995
A2M	A2M	A2M
A2ML1	A2ML1	A2ML1
AADACL3_ENST00000359318	AADACL3_ENST00000359318	AADACL3_ENST00000359318
AAK1	AAK1	AAK1
AAK1_ENST00000409085	AAK1_ENST00000409085	AAK1_ENST00000409085
AARS	AARS	AARS
AARS2	AARS2	AARS2
AASS	AASS	AASS
AATK	AATK	AATK
AATK_ENST00000326724	AATK_ENST00000326724	AATK_ENST00000326724
ABCA1	ABCA1	ABCA1
ABCA12	ABCA12	ABCA12
ABCA12_ENST00000389661	ABCA12_ENST00000389661	ABCA12_ENST00000389661
ABCA13	ABCA13	ABCA13
ABCA13_ENST00000435803	ABCA13_ENST00000435803	ABCA13_ENST00000435803
ABCA3	ABCA3	ABCA3
ABCA4	ABCA4	ABCA4
ABCA4_ENST00000535735	ABCA4_ENST00000535735	ABCA4_ENST00000535735
ABCA7	ABCA7	ABCA7
ABCA8	ABCA8	ABCA8
ABCA8_ENST00000430352	ABCA8_ENST00000430352	ABCA8_ENST00000430352
ABCA9	ABCA9	ABCA9
ABCB1	ABCB1	ABCB1
ABCB10	ABCB10	ABCB10
ABCB11	ABCB11	ABCB11
ABCB11_ENST00000263817	ABCB11_ENST00000263817	ABCB11_ENST00000263817
ABCB4	ABCB4	ABCB4
ABCB4_ENST00000265723	ABCB4_ENST00000265723	ABCB4_ENST00000265723
ABCB5_ENST00000404938	ABCB5_ENST00000404938	ABCB5_ENST00000404938
ABCB6_ENST00000265316	ABCB6_ENST00000265316	ABCB6_ENST00000265316
ABCB7	ABCB7	ABCB7
ABCC11	ABCC11	ABCC11
ABCC12	ABCC12	ABCC12
ABCC2	ABCC2	ABCC2
ABCC3	ABCC3	ABCC3
ABCC4	ABCC4	ABCC4
ABCC4_ENST00000376887	ABCC4_ENST00000376887	ABCC4_ENST00000376887
ABCC9	ABCC9	ABCC9
ABCC9_ENST00000261201	ABCC9_ENST00000261201	ABCC9_ENST00000261201
ABCD1	ABCD1	ABCD1
ABCD4
ABCF1	ABCF1	ABCF1
ABCF2_ENST00000222388
ABCF3	ABCF3	ABCF3
ABCG1	ABCG1	ABCG1
ABCG1_ENST00000398457	ABCG1_ENST00000398457	ABCG1_ENST00000398457
ABCG2	ABCG2	ABCG2
ABCG2_ENST00000237612	ABCG2_ENST00000237612	ABCG2_ENST00000237612
ABCG4	ABCG4	ABCG4
ABHD16A	ABHD16A	ABHD16A
ABHD2
ABI3BP	ABI3BP	ABI3BP
ABI3BP_ENST00000383691	ABI3BP_ENST00000383691	ABI3BP_ENST00000383691
ABI3BP_ENST00000471714	ABI3BP_ENST00000471714	ABI3BP_ENST00000471714
ABL1	ABL1	ABL1
ABL1_ENST00000318560	ABL1_ENST00000318560	ABL1_ENST00000318560
ABL1_ENST00000372348	ABL1_ENST00000372348	ABL1_ENST00000372348
ABLIM1	ABLIM1	ABLIM1
ABLIM1_ENST00000277895	ABLIM1_ENST00000277895	ABLIM1_ENST00000277895
ABLIM1_ENST00000336585	ABLIM1_ENST00000336585	ABLIM1_ENST00000336585
ABLIM2	ABLIM2	ABLIM2
ABLIM2_ENST00000296372	ABLIM2_ENST00000296372	ABLIM2_ENST00000296372
ABLIM2_ENST00000361737	ABLIM2_ENST00000361737	ABLIM2_ENST00000361737
ABLIM3	ABLIM3	ABLIM3
ABLIM3_ENST00000504238	ABLIM3_ENST00000504238	ABLIM3_ENST00000504238
ABP1	ABP1	ABP1
ABP1_ENST00000416793	ABP1_ENST00000416793	ABP1_ENST00000416793
ABR	ABR	ABR
ABR_ENST00000291107	ABR_ENST00000291107	ABR_ENST00000291107
ABRA	ABRA	ABRA
ABTB1	ABTB1	ABTB1
ABTB2	ABTB2	ABTB2
ABTB2_ENST00000435224	ABTB2_ENST00000435224	ABTB2_ENST00000435224
AC013469_8-2	AC013469_8-2	AC013469_8-2
AC022601.1	AC022601.1	AC022601.1
AC022601.1_ENST00000554864	AC022601.1_ENST00000554864	AC022601.1_ENST00000554864
AC099524.1	AC099524.1	AC099524.1
ACACB	ACACB	ACACB
ACACB_ENST00000543201	ACACB_ENST00000543201	ACACB_ENST00000543201
ACAD11	ACAD11	ACAD11
ACAD9	ACAD9	ACAD9
ACADL
ACAN	ACAN	ACAN
ACAP3	ACAP3	ACAP3
ACAP3_ENST00000354700	ACAP3_ENST00000354700	ACAP3_ENST00000354700
ACBD5	ACBD5	ACBD5
ACBD5_ENST00000375888	ACBD5_ENST00000375888	ACBD5_ENST00000375888
ACBD5_ENST00000396271	ACBD5_ENST00000396271	ACBD5_ENST00000396271
ACCN2
ACCN3	ACCN3	ACCN3
ACCN4	ACCN4	ACCN4
ACD
ACE	ACE	ACE
ACE_ENST00000290863	ACE_ENST00000290863	ACE_ENST00000290863
ACE_ENST00000428043	ACE_ENST00000428043	ACE_ENST00000428043
ACE_ENST00000490216	ACE_ENST00000490216	ACE_ENST00000490216
ACE2	ACE2	ACE2
ACHE	ACHE	ACHE
ACHE_ENST00000412389	ACHE_ENST00000412389	ACHE_ENST00000412389
ACLY	ACLY	ACLY
ACMSD	ACMSD	ACMSD
ACO1	ACO1	ACO1
ACO1_ENST00000379923	ACO1_ENST00000379923	ACO1_ENST00000379923
ACO2	ACO2	ACO2
ACOT11	ACOT11	ACOT11
ACOT11_ENST00000371316	ACOT11_ENST00000371316	ACOT11_ENST00000371316
ACOX1	ACOX1	ACOX1
ACOX1_ENST00000301608	ACOX1_ENST00000301608	ACOX1_ENST00000301608
ACOX2	ACOX2	ACOX2
ACOXL	ACOXL	ACOXL
ACOXL_ENST00000439055	ACOXL_ENST00000439055	ACOXL_ENST00000439055
ACPL2
ACPP	ACPP	ACPP
ACPP_ENST00000351273	ACPP_ENST00000351273	ACPP_ENST00000351273
ACPT	ACPT	ACPT
ACRC	ACRC	ACRC
ACTB	ACTB	ACTB
ACTBL2	ACTBL2	ACTBL2
ACTC1	ACTC1	ACTC1
ACTG2	ACTG2	ACTG2
ACTL8	ACTL8	ACTL8
ACTN1	ACTN1	ACTN1
ACTN1_ENST00000394419	ACTN1_ENST00000394419	ACTN1_ENST00000394419
ACTN2	ACTN2	ACTN2
ACTN2_ENST00000542672
ACTN4	ACTN4	ACTN4
ACTR5	ACTR5	ACTR5
ACTR8	ACTR8	ACTR8
ACTRT1	ACTRT1	ACTRT1
ACVR1	ACVR1	ACVR1
ACVR1C	ACVR1C	ACVR1C
ACVR2B	ACVR2B	ACVR2B
ACVR2B_ENST00000352511	ACVR2B_ENST00000352511	ACVR2B_ENST00000352511
ACVRL1	ACVRL1	ACVRL1
ACVRL1_ENST00000550683	ACVRL1_ENST00000550683	ACVRL1_ENST00000550683
ACSBG1	ACSBG1	ACSBG1
ACSBG2	ACSBG2	ACSBG2
ACCS	ACCS	ACCS
ACCSL	ACCSL	ACCSL
ACSF3	ACSF3	ACSF3
ACSL1	ACSL1	ACSL1
ACSL4
ACSL6	ACSL6	ACSL6
ACSL6_ENST00000379249	ACSL6_ENST00000379249	ACSL6_ENST00000379249
ACSL6_ENST00000379264	ACSL6_ENST00000379264	ACSL6_ENST00000379264
ACSL6_ENST00000379272	ACSL6_ENST00000379272	ACSL6_ENST00000379272
ACSM2A
ACSM2B	ACSM2B	ACSM2B
ACSM3	ACSM3	ACSM3
ACSM4	ACSM4	ACSM4
ACSM4_ENST00000399422	ACSM4_ENST00000399422	ACSM4_ENST00000399422
ACSM5	ACSM5	ACSM5
ACSS1	ACSS1	ACSS1
ACSS1_ENST00000537502	ACSS1_ENST00000537502	ACSS1_ENST00000537502
ACSS1_ENST00000542618	ACSS1_ENST00000542618	ACSS1_ENST00000542618
ACSS2	ACSS2	ACSS2
ACSS2_ENST00000253382	ACSS2_ENST00000253382	ACSS2_ENST00000253382
ACSS3	ACSS3	ACSS3
ADAD1	ADAD1	ADAD1
ADAD2	ADAD2	ADAD2
ADAM11	ADAM11	ADAM11
ADAM11_ENST00000200557	ADAM11_ENST00000200557	ADAM11_ENST00000200557
ADAM12	ADAM12	ADAM12
ADAM12_ENST00000368676	ADAM12_ENST00000368676	ADAM12_ENST00000368676
ADAM12_ENST00000368679	ADAM12_ENST00000368679	ADAM12_ENST00000368679
ADAM15	ADAM15	ADAM15
ADAM17	ADAM17	ADAM17
ADAM18	ADAM18	ADAM18
ADAM19	ADAM19	ADAM19
ADAM19_ENST00000257527	ADAM19_ENST00000257527	ADAM19_ENST00000257527
ADAM19_ENST00000394020	ADAM19_ENST00000394020	ADAM19_ENST00000394020
ADAM19_ENST00000430702	ADAM19_ENST00000430702	ADAM19_ENST00000430702
ADAM2	ADAM2	ADAM2
ADAM20	ADAM20	ADAM20
ADAM21	ADAM21	ADAM21
ADAM21_ENST00000267499	ADAM21_ENST00000267499	ADAM21_ENST00000267499
ADAM22	ADAM22	ADAM22
ADAM22_ENST00000265727	ADAM22_ENST00000265727	ADAM22_ENST00000265727
ADAM22_ENST00000315984	ADAM22_ENST00000315984	ADAM22_ENST00000315984
ADAM23	ADAM23	ADAM23
ADAM23_ENST00000374415	ADAM23_ENST00000374415	ADAM23_ENST00000374415
ADAM23_ENST00000374416	ADAM23_ENST00000374416	ADAM23_ENST00000374416
ADAM28	ADAM28	ADAM28
ADAM29	ADAM29	ADAM29
ADAM30	ADAM30	ADAM30
ADAM32	ADAM32	ADAM32
ADAM33	ADAM33	ADAM33
ADAM7	ADAM7	ADAM7
ADAM9	ADAM9	ADAM9
ADAMTS1	ADAMTS1	ADAMTS1
ADAMTS10	ADAMTS10	ADAMTS10
ADAMTS12	ADAMTS12	ADAMTS12
ADAMTS13	ADAMTS13	ADAMTS13
ADAMTS14	ADAMTS14	ADAMTS14
ADAMTS14_ENST00000373208	ADAMTS14_ENST00000373208	ADAMTS14_ENST00000373208
ADAMTS15	ADAMTS15	ADAMTS15
ADAMTS16	ADAMTS16	ADAMTS16
ADAMTS16_ENST00000274181	ADAMTS16_ENST00000274181	ADAMTS16_ENST00000274181
ADAMTS18	ADAMTS18	ADAMTS18
ADAMTS19	ADAMTS19	ADAMTS19
ADAMTS19_ENST00000274487	ADAMTS19_ENST00000274487	ADAMTS19_ENST00000274487
ADAMTS2	ADAMTS2	ADAMTS2
ADAMTS2_ENST00000274609	ADAMTS2_ENST00000274609	ADAMTS2_ENST00000274609
ADAMTS20	ADAMTS20	ADAMTS20
ADAMTS20_ENST00000389420	ADAMTS20_ENST00000389420	ADAMTS20_ENST00000389420
ADAMTS20_ENST00000553158	ADAMTS20_ENST00000553158	ADAMTS20_ENST00000553158
ADAMTS4	ADAMTS4	ADAMTS4
ADAMTS5	ADAMTS5	ADAMTS5
ADAMTS6_ENST00000381055	ADAMTS6_ENST00000381055	ADAMTS6_ENST00000381055
ADAMTS8_ENST00000414575	ADAMTS8_ENST00000414575	ADAMTS8_ENST00000414575
ADAMTS9	ADAMTS9	ADAMTS9
ADAMTSL1	ADAMTSL1	ADAMTSL1
ADAMTSL1_ENST00000380548	ADAMTSL1_ENST00000380548	ADAMTSL1_ENST00000380548
ADAMTSL1_ENST00000380566	ADAMTSL1_ENST00000380566	ADAMTSL1_ENST00000380566
ADAMTSL2	ADAMTSL2	ADAMTSL2
ADAMTSL2_ENST00000393061	ADAMTSL2_ENST00000393061	ADAMTSL2_ENST00000393061
ADAMTSL3	ADAMTSL3	ADAMTSL3
ADAMTSL3_ENST00000567476
ADAMTSL4_ENST00000369039	ADAMTSL4_ENST00000369039	ADAMTSL4_ENST00000369039
ADAMTSL4_ENST00000369041	ADAMTSL4_ENST00000369041	ADAMTSL4_ENST00000369041
ADAR	ADAR	ADAR
ADAR_ENST00000292205	ADAR_ENST00000292205	ADAR_ENST00000292205
ADARB1	ADARB1	ADARB1
ADARB1_ENST00000389863	ADARB1_ENST00000389863	ADARB1_ENST00000389863
ADAT1	ADAT1	ADAT1
ADCK1	ADCK1	ADCK1
ADCK1_ENST00000238561	ADCK1_ENST00000238561	ADCK1_ENST00000238561
ADCK2	ADCK2	ADCK2
ADCK4	ADCK4	ADCK4
ADCK4_ENST00000324464	ADCK4_ENST00000324464	ADCK4_ENST00000324464
ADCY1	ADCY1	ADCY1
ADCY10	ADCY10	ADCY10
ADCY2	ADCY2	ADCY2
ADCY2_ENST00000537121	ADCY2_ENST00000537121	ADCY2_ENST00000537121
ADCY6
ADCY7	ADCY7	ADCY7
ADCY8	ADCY8	ADCY8
ADCYAP1R1	ADCYAP1R1	ADCYAP1R1
ADD2	ADD2	ADD2
ADD2_ENST00000264436	ADD2_ENST00000264436	ADD2_ENST00000264436
ADD2_ENST00000430656	ADD2_ENST00000430656	ADD2_ENST00000430656
ADH1A	ADH1A	ADH1A
ADH1B
ADH6	ADH6	ADH6
ADH6_ENST00000394899	ADH6_ENST00000394899	ADH6_ENST00000394899
ADH7	ADH7	ADH7
ADH7_ENST00000476959	ADH7_ENST00000476959	ADH7_ENST00000476959
ADNP2	ADNP2	ADNP2
ADORA1
ADORA2A	ADORA2A	ADORA2A
ADORA3_ENST00000369716	ADORA3_ENST00000369716	ADORA3_ENST00000369716
ADRBK1	ADRBK1	ADRBK1
ADRBK2	ADRBK2	ADRBK2
ADSL	ADSL	ADSL
ADSL_ENST00000216194	ADSL_ENST00000216194	ADSL_ENST00000216194
ADSSL1	ADSSL1	ADSSL1
AEBP1	AEBP1	AEBP1
AFAP1L1	AFAP1L1	AFAP1L1
AFAP1L2	AFAP1L2	AFAP1L2
AFAP1L2_ENST00000545353	AFAP1L2_ENST00000545353	AFAP1L2_ENST00000545353
AFF1_ENST00000395146	AFF1_ENST00000395146	AFF1_ENST00000395146
AFF2	AFF2	AFF2
AFF2_ENST00000286437	AFF2_ENST00000286437	AFF2_ENST00000286437
AFF2_ENST00000370460	AFF2_ENST00000370460	AFF2_ENST00000370460
AFF3	AFF3	AFF3
AFF4	AFF4	AFF4
AFG3L2	AFG3L2	AFG3L2
AFM	AFM	AFM
AFTPH	AFTPH	AFTPH
AFTPH_ENST00000238855	AFTPH_ENST00000238855	AFTPH_ENST00000238855
AGAP1	AGAP1	AGAP1
AGAP2	AGAP2	AGAP2
AGAP2_ENST00000547588	AGAP2_ENST00000547588	AGAP2_ENST00000547588
AGAP3	AGAP3	AGAP3
AGBL1	AGBL1	AGBL1
AGBL1_ENST00000389298	AGBL1_ENST00000389298	AGBL1_ENST00000389298
AGBL1_ENST00000441037	AGBL1_ENST00000441037	AGBL1_ENST00000441037
AGBL2	AGBL2	AGBL2
AGBL4
AGC1	AGC1	AGC1
AGFG2	AGFG2	AGFG2
AGMO	AGMO	AGMO
AGPAT4	AGPAT4	AGPAT4
AGPAT6	AGPAT6	AGPAT6
AGPAT9	AGPAT9	AGPAT9
AGPS	AGPS	AGPS
AGRN	AGRN	AGRN
AGTPBP1_ENST00000357081	AGTPBP1_ENST00000357081	AGTPBP1_ENST00000357081
AGTR1	AGTR1	AGTR1
AGTR2	AGTR2	AGTR2
AGXT	AGXT	AGXT
AGXT2	AGXT2	AGXT2
AHCY	AHCY	AHCY
AHDC1	AHDC1	AHDC1
AHNAK	AHNAK	AHNAK
AHNAK2_ENST00000333244	AHNAK2_ENST00000333244	AHNAK2_ENST00000333244
AHR	AHR	AHR
AHRR	AHRR	AHRR
AHSG	AHSG	AHSG
AICDA	AICDA	AICDA
AIFM1	AIFM1	AIFM1
AIFM3	AIFM3	AIFM3
AIFM3_ENST00000335375	AIFM3_ENST00000335375	AIFM3_ENST00000335375
AIFM3_ENST00000405089	AIFM3_ENST00000405089	AIFM3_ENST00000405089
AIM1	AIM1	AIM1
AIRE	AIRE	AIRE
AJAP1	AJAP1	AJAP1
AK5	AK5	AK5
AK7	AK7	AK7
AK8	AK8	AK8
AKAP1	AKAP1	AKAP1
AKAP11	AKAP11	AKAP11
AKAP12	AKAP12	AKAP12
AKAP12_ENST00000359755	AKAP12_ENST00000359755	AKAP12_ENST00000359755
AKAP13	AKAP13	AKAP13
AKAP13_ENST00000394518	AKAP13_ENST00000394518	AKAP13_ENST00000394518
AKAP17A	AKAP17A	AKAP17A
AKAP17A_ENST00000381261	AKAP17A_ENST00000381261	AKAP17A_ENST00000381261
AKAP2	AKAP2	AKAP2
AKAP3	AKAP3	AKAP3
AKAP3_ENST00000545990	AKAP3_ENST00000545990	AKAP3_ENST00000545990
AKAP4	AKAP4	AKAP4
AKAP6	AKAP6	AKAP6
AKAP8	AKAP8	AKAP8
AKAP8L	AKAP8L	AKAP8L
AKAP8L_ENST00000397410	AKAP8L_ENST00000397410	AKAP8L_ENST00000397410
AKAP9	AKAP9	AKAP9
AKAP9_ENST00000356239	AKAP9_ENST00000356239	AKAP9_ENST00000356239
AKNA	AKNA	AKNA
AKNAD1	AKNAD1	AKNAD1
AKNAD1_ENST00000369995	AKNAD1_ENST00000369995	AKNAD1_ENST00000369995
AKR1D1	AKR1D1	AKR1D1
AKT2
AL589988.1	AL589988.1	AL589988.1
ALAS1
ALAS2	ALAS2	ALAS2
ALAS2_ENST00000330807	ALAS2_ENST00000330807	ALAS2_ENST00000330807
ALAS2_ENST00000396198	ALAS2_ENST00000396198	ALAS2_ENST00000396198
ALB	ALB	ALB
ALCAM	ALCAM	ALCAM
ALDH16A1	ALDH16A1	ALDH16A1
ALDH18A1	ALDH18A1	ALDH18A1
ALDH1A1	ALDH1A1	ALDH1A1
ALDH1A2	ALDH1A2	ALDH1A2
ALDH1A3	ALDH1A3	ALDH1A3
ALDH1B1
ALDH1L1	ALDH1L1	ALDH1L1
ALDH1L2	ALDH1L2	ALDH1L2
ALDH2	ALDH2	ALDH2
ALDH2_ENST00000261733	ALDH2_ENST00000261733	ALDH2_ENST00000261733
ALDH3A1	ALDH3A1	ALDH3A1
ALDH5A1	ALDH5A1	ALDH5A1
ALDH6A1	ALDH6A1	ALDH6A1
ALDH8A1	ALDH8A1	ALDH8A1
ALDOB	ALDOB	ALDOB
ALG1	ALG1	ALG1
ALG10	ALG10	ALG10
ALG10B	ALG10B	ALG10B
ALG13_ENST00000251943	ALG13_ENST00000251943	ALG13_ENST00000251943
ALKBH8_ENST00000428149
ALLC	ALLC	ALLC
ALOX12	ALOX12	ALOX12
ALOX12B	ALOX12B	ALOX12B
ALOX12B_ENST00000319144	ALOX12B_ENST00000319144	ALOX12B_ENST00000319144
ALOX15_ENST00000545513	ALOX15_ENST00000545513	ALOX15_ENST00000545513
ALOX15B	ALOX15B	ALOX15B
ALOX5	ALOX5	ALOX5
ALOXE3	ALOXE3	ALOXE3
ALOXE3_ENST00000318227	ALOXE3_ENST00000318227	ALOXE3_ENST00000318227
ALPK1	ALPK1	ALPK1
ALPK2	ALPK2	ALPK2
ALPK2_ENST00000361673	ALPK2_ENST00000361673	ALPK2_ENST00000361673
ALPK3	ALPK3	ALPK3
ALPK3_ENST00000258888	ALPK3_ENST00000258888	ALPK3_ENST00000258888
ALPP	ALPP	ALPP
ALPPL2	ALPPL2	ALPPL2
ALS2	ALS2	ALS2
ALS2CL	ALS2CL	ALS2CL
ALS2CR11	ALS2CR11	ALS2CR11
ALS2CR11_ENST00000439140	ALS2CR11_ENST00000439140	ALS2CR11_ENST00000439140
ALS2CR11_ENST00000450242	ALS2CR11_ENST00000450242	ALS2CR11_ENST00000450242
ALS2CR8	ALS2CR8	ALS2CR8
ALX1	ALX1	ALX1
AMAC1	AMAC1	AMAC1
AMAC1L2	AMAC1L2	AMAC1L2
AMACR	AMACR	AMACR
AMBN	AMBN	AMBN
AMDHD1	AMDHD1	AMDHD1
AMFR
AMHR2
AMIGO2	AMIGO2	AMIGO2
AMOT	AMOT	AMOT
AMOT_ENST00000371958
AMOT_ENST00000371959	AMOT_ENST00000371959	AMOT_ENST00000371959
AMOTL1	AMOTL1	AMOTL1
AMOTL2	AMOTL2	AMOTL2
AMPD1	AMPD1	AMPD1
AMPD1_ENST00000520113	AMPD1_ENST00000520113	AMPD1_ENST00000520113
AMPD2_ENST00000393688	AMPD2_ENST00000393688	AMPD2_ENST00000393688
AMPD2_ENST00000393689	AMPD2_ENST00000393689	AMPD2_ENST00000393689
AMPD3	AMPD3	AMPD3
AMPH	AMPH	AMPH
AMPH_ENST00000428293	AMPH_ENST00000428293	AMPH_ENST00000428293
AMY2B	AMY2B	AMY2B
ANAPC1	ANAPC1	ANAPC1
ANAPC2	ANAPC2	ANAPC2
ANAPC4	ANAPC4	ANAPC4
ANAPC5	ANAPC5	ANAPC5
ANAPC7
ANGEL1	ANGEL1	ANGEL1
ANGPT2	ANGPT2	ANGPT2
ANGPT2_ENST00000325203	ANGPT2_ENST00000325203	ANGPT2_ENST00000325203
ANGPT4	ANGPT4	ANGPT4
ANGPTL1	ANGPTL1	ANGPTL1
ANGPTL4	ANGPTL4	ANGPTL4
ANGPTL5	ANGPTL5	ANGPTL5
ANK1	ANK1	ANK1
ANK1_ENST00000265709	ANK1_ENST00000265709	ANK1_ENST00000265709
ANK2	ANK2	ANK2
ANK2_ENST00000506722	ANK2_ENST00000506722	ANK2_ENST00000506722
ANK3	ANK3	ANK3
ANK3_ENST00000395293	ANK3_ENST00000395293	ANK3_ENST00000395293
ANKFN1	ANKFN1	ANKFN1
ANKFY1	ANKFY1	ANKFY1
ANKFY1_ENST00000570535	ANKFY1_ENST00000570535	ANKFY1_ENST00000570535
ANKHD1	ANKHD1	ANKHD1
ANKHD1_ENST00000261805	ANKHD1_ENST00000261805	ANKHD1_ENST00000261805
ANKHD1-EIF4EBP3	ANKHD1-EIF4EBP3	ANKHD1-EIF4EBP3
ANKIB1	ANKIB1	ANKIB1
ANKK1	ANKK1	ANKK1
ANKLE1	ANKLE1	ANKLE1
ANKLE2	ANKLE2	ANKLE2
ANKLE2_ENST00000337516
ANKRD11	ANKRD11	ANKRD11
ANKRD13C	ANKRD13C	ANKRD13C
ANKRD13D	ANKRD13D	ANKRD13D
ANKRD13D_ENST00000511455	ANKRD13D_ENST00000511455	ANKRD13D_ENST00000511455
ANKRD17	ANKRD17	ANKRD17
ANKRD18A	ANKRD18A	ANKRD18A
ANKRD18B	ANKRD18B	ANKRD18B
ANKRD20A4	ANKRD20A4	ANKRD20A4
ANKRD24	ANKRD24	ANKRD24
ANKRD24_ENST00000262970	ANKRD24_ENST00000262970	ANKRD24_ENST00000262970
ANKRD24_ENST00000318934	ANKRD24_ENST00000318934	ANKRD24_ENST00000318934
ANKRD26	ANKRD26	ANKRD26
ANKRD26_ENST00000376070	ANKRD26_ENST00000376070	ANKRD26_ENST00000376070
ANKRD27	ANKRD27	ANKRD27
ANKRD30A	ANKRD30A	ANKRD30A
ANKRD30A_ENST00000602533	ANKRD30A_ENST00000602533	ANKRD30A_ENST00000602533
ANKRD30B	ANKRD30B	ANKRD30B
ANKRD30B_ENST00000358984	ANKRD30B_ENST00000358984	ANKRD30B_ENST00000358984
ANKRD32_ENST00000265140	ANKRD32_ENST00000265140	ANKRD32_ENST00000265140
ANKRD34A	ANKRD34A	ANKRD34A
ANKRD34B	ANKRD34B	ANKRD34B
ANKRD35	ANKRD35	ANKRD35
ANKRD36	ANKRD36	ANKRD36
ANKRD44	ANKRD44	ANKRD44
ANKRD44_ENST00000282272	ANKRD44_ENST00000282272	ANKRD44_ENST00000282272
ANKRD44_ENST00000337207	ANKRD44_ENST00000337207	ANKRD44_ENST00000337207
ANKRD44_ENST00000424317	ANKRD44_ENST00000424317	ANKRD44_ENST00000424317
ANKRD5	ANKRD5	ANKRD5
ANKRD52	ANKRD52	ANKRD52
ANKRD55	ANKRD55	ANKRD55
ANKRD6	ANKRD6	ANKRD6
ANKS1A	ANKS1A	ANKS1A
ANKS1A_ENST00000373990	ANKS1A_ENST00000373990	ANKS1A_ENST00000373990
ANKS1B	ANKS1B	ANKS1B
ANKS1B_ENST00000329257	ANKS1B_ENST00000329257	ANKS1B_ENST00000329257
ANKS1B_ENST00000332712	ANKS1B_ENST00000332712	ANKS1B_ENST00000332712
ANKS1B_ENST00000549493	ANKS1B_ENST00000549493	ANKS1B_ENST00000549493
ANKS6	ANKS6	ANKS6
ANKZF1	ANKZF1	ANKZF1
ANLN	ANLN	ANLN
ANO2	ANO2	ANO2
ANO2_ENST00000327087	ANO2_ENST00000327087	ANO2_ENST00000327087
ANO2_ENST00000356134	ANO2_ENST00000356134	ANO2_ENST00000356134
ANO2_ENST00000546188	ANO2_ENST00000546188	ANO2_ENST00000546188
ANO3	ANO3	ANO3
ANO4	ANO4	ANO4
ANO5	ANO5	ANO5
ANO6_ENST00000425752	ANO6_ENST00000425752	ANO6_ENST00000425752
ANO8	ANO8	ANO8
ANPEP	ANPEP	ANPEP
ANTXR2_ENST00000403729	ANTXR2_ENST00000403729	ANTXR2_ENST00000403729
ANUBL1	ANUBL1	ANUBL1
ANXA13	ANXA13	ANXA13
ANXA6	ANXA6	ANXA6
ANXA6_ENST00000354546	ANXA6_ENST00000354546	ANXA6_ENST00000354546
AOAH	AOAH	AOAH
AOC2	AOC2	AOC2
AOC3	AOC3	AOC3
AOF2	AOF2	AOF2
AOX1	AOX1	AOX1
AP1G1	AP1G1	AP1G1
AP1G1_ENST00000393512	AP1G1_ENST00000393512	AP1G1_ENST00000393512
AP1G1_ENST00000423132	AP1G1_ENST00000423132	AP1G1_ENST00000423132
AP1G1_ENST00000433195	AP1G1_ENST00000433195	AP1G1_ENST00000433195
AP1G2	AP1G2	AP1G2
AP1G2_ENST00000535852	AP1G2_ENST00000535852	AP1G2_ENST00000535852
AP2A1	AP2A1	AP2A1
AP2A1_ENST00000359032	AP2A1_ENST00000359032	AP2A1_ENST00000359032
AP2M1	AP2M1	AP2M1
AP3B2	AP3B2	AP3B2
AP3D1	AP3D1	AP3D1
AP3D1_ENST00000355272	AP3D1_ENST00000355272	AP3D1_ENST00000355272
AP3D1_ENST00000356926	AP3D1_ENST00000356926	AP3D1_ENST00000356926
AP4B1	AP4B1	AP4B1
AP4M1	AP4M1	AP4M1
AP5B1	AP5B1	AP5B1
AP5B1_ENST00000532090	AP5B1_ENST00000532090	AP5B1_ENST00000532090
APBA2	APBA2	APBA2
APBB1	APBB1	APBB1
APBB1_ENST00000389906	APBB1_ENST00000389906	APBB1_ENST00000389906
APBB1IP	APBB1IP	APBB1IP
APBB2	APBB2	APBB2
APBB2_ENST00000295974	APBB2_ENST00000295974	APBB2_ENST00000295974
APBB3	APBB3	APBB3
APC2	APC2	APC2
APCDD1L	APCDD1L	APCDD1L
APCDD1L_ENST00000439429	APCDD1L_ENST00000439429	APCDD1L_ENST00000439429
APEH	APEH	APEH
APEX2	APEX2	APEX2
APLP1	APLP1	APLP1
APLP2	APLP2	APLP2
APOA5	APOA5	APOA5
APOB	APOB	APOB
APOBR	APOBR	APOBR
APOBR_ENST00000564831	APOBR_ENST00000564831	APOBR_ENST00000564831
APOH	APOH	APOH
APOL5	APOL5	APOL5
APP	APP	APP
APPBP2	APPBP2	APPBP2
APPL2	APPL2	APPL2
AQP10	AQP10	AQP10
ARAP1_ENST00000393609	ARAP1_ENST00000393609	ARAP1_ENST00000393609
ARAP2	ARAP2	ARAP2
ARAP3	ARAP3	ARAP3
ARC	ARC	ARC
ARFGEF1	ARFGEF1	ARFGEF1
ARFGEF2	ARFGEF2	ARFGEF2
ARHGAP10	ARHGAP10	ARHGAP10
ARHGAP12_ENST00000344936
ARHGAP15	ARHGAP15	ARHGAP15
ARHGAP17	ARHGAP17	ARHGAP17
ARHGAP17_ENST00000289968	ARHGAP17_ENST00000289968	ARHGAP17_ENST00000289968
ARHGAP20	ARHGAP20	ARHGAP20
ARHGAP20_ENST00000533353	ARHGAP20_ENST00000533353	ARHGAP20_ENST00000533353
ARHGAP21	ARHGAP21	ARHGAP21
ARHGAP21_ENST00000320481	ARHGAP21_ENST00000320481	ARHGAP21_ENST00000320481
ARHGAP21_ENST00000376410	ARHGAP21_ENST00000376410	ARHGAP21_ENST00000376410
ARHGAP22	ARHGAP22	ARHGAP22
ARHGAP22_ENST00000417247	ARHGAP22_ENST00000417247	ARHGAP22_ENST00000417247
ARHGAP22_ENST00000417912	ARHGAP22_ENST00000417912	ARHGAP22_ENST00000417912
ARHGAP24	ARHGAP24	ARHGAP24
ARHGAP25	ARHGAP25	ARHGAP25
ARHGAP25_ENST00000409202	ARHGAP25_ENST00000409202	ARHGAP25_ENST00000409202
ARHGAP25_ENST00000497079	ARHGAP25_ENST00000497079	ARHGAP25_ENST00000497079
ARHGAP26	ARHGAP26	ARHGAP26
ARHGAP27	ARHGAP27	ARHGAP27
ARHGAP27_ENST00000428638	ARHGAP27_ENST00000428638	ARHGAP27_ENST00000428638
ARHGAP28	ARHGAP28	ARHGAP28
ARHGAP28_ENST00000400091	ARHGAP28_ENST00000400091	ARHGAP28_ENST00000400091
ARHGAP30	ARHGAP30	ARHGAP30
ARHGAP31	ARHGAP31	ARHGAP31
ARHGAP32	ARHGAP32	ARHGAP32
ARHGAP32_ENST00000310343	ARHGAP32_ENST00000310343	ARHGAP32_ENST00000310343
ARHGAP33	ARHGAP33	ARHGAP33
ARHGAP33_ENST00000378944	ARHGAP33_ENST00000378944	ARHGAP33_ENST00000378944
ARHGAP36	ARHGAP36	ARHGAP36
ARHGAP36_ENST00000276211	ARHGAP36_ENST00000276211	ARHGAP36_ENST00000276211
ARHGAP4	ARHGAP4	ARHGAP4
ARHGAP4_ENST00000370028	ARHGAP4_ENST00000370028	ARHGAP4_ENST00000370028
ARHGAP40_ENST00000373345
ARHGAP42	ARHGAP42	ARHGAP42
ARHGAP44	ARHGAP44	ARHGAP44
ARHGAP5	ARHGAP5	ARHGAP5
ARHGAP6	ARHGAP6	ARHGAP6
ARHGAP6_ENST00000380718	ARHGAP6_ENST00000380718	ARHGAP6_ENST00000380718
ARHGAP6_ENST00000380732	ARHGAP6_ENST00000380732	ARHGAP6_ENST00000380732
ARHGAP6_ENST00000534860
ARHGEF1	ARHGEF1	ARHGEF1
ARHGEF10	ARHGEF10	ARHGEF10
ARHGEF10_ENST00000398560	ARHGEF10_ENST00000398560	ARHGEF10_ENST00000398560
ARHGEF10_ENST00000398564	ARHGEF10_ENST00000398564	ARHGEF10_ENST00000398564
ARHGEF10L	ARHGEF10L	ARHGEF10L
ARHGEF10L_ENST00000361221	ARHGEF10L_ENST00000361221	ARHGEF10L_ENST00000361221
ARHGEF10L_ENST00000375408	ARHGEF10L_ENST00000375408	ARHGEF10L_ENST00000375408
ARHGEF11	ARHGEF11	ARHGEF11
ARHGEF11_ENST00000315174	ARHGEF11_ENST00000315174	ARHGEF11_ENST00000315174
ARHGEF12	ARHGEF12	ARHGEF12
ARHGEF15	ARHGEF15	ARHGEF15
ARHGEF17	ARHGEF17	ARHGEF17
ARHGEF19	ARHGEF19	ARHGEF19
ARHGEF2	ARHGEF2	ARHGEF2
ARHGEF2_ENST00000361247	ARHGEF2_ENST00000361247	ARHGEF2_ENST00000361247
ARHGEF2_ENST00000368315	ARHGEF2_ENST00000368315	ARHGEF2_ENST00000368315
ARHGEF25	ARHGEF25	ARHGEF25
ARHGEF25_ENST00000333972	ARHGEF25_ENST00000333972	ARHGEF25_ENST00000333972
ARHGEF26	ARHGEF26	ARHGEF26
ARHGEF26_ENST00000356448	ARHGEF26_ENST00000356448	ARHGEF26_ENST00000356448
ARHGEF3	ARHGEF3	ARHGEF3
ARHGEF3_ENST00000296315	ARHGEF3_ENST00000296315	ARHGEF3_ENST00000296315
ARHGEF3_ENST00000338458	ARHGEF3_ENST00000338458	ARHGEF3_ENST00000338458
ARHGEF3_ENST00000413728	ARHGEF3_ENST00000413728	ARHGEF3_ENST00000413728
ARHGEF4	ARHGEF4	ARHGEF4
ARHGEF40_ENST00000298694	ARHGEF40_ENST00000298694	ARHGEF40_ENST00000298694
ARHGEF5	ARHGEF5	ARHGEF5
ARHGEF6	ARHGEF6	ARHGEF6
ARHGEF7_ENST00000375736	ARHGEF7_ENST00000375736	ARHGEF7_ENST00000375736
ARHGEF9	ARHGEF9	ARHGEF9
ARHGEF9_ENST00000253401	ARHGEF9_ENST00000253401	ARHGEF9_ENST00000253401
ARHGEF9_ENST00000374878	ARHGEF9_ENST00000374878	ARHGEF9_ENST00000374878
ARID3A	ARID3A	ARID3A
ARID3B	ARID3B	ARID3B
ARID3C	ARID3C	ARID3C
ARID5B	ARID5B	ARID5B
ARMC2	ARMC2	ARMC2
ARMC4	ARMC4	ARMC4
ARMC4_ENST00000434029
ARMC4_ENST00000545014	ARMC4_ENST00000545014	ARMC4_ENST00000545014
ARMC5	ARMC5	ARMC5
ARMC5_ENST00000457010	ARMC5_ENST00000457010	ARMC5_ENST00000457010
ARMC8_ENST00000481646
ARMC9	ARMC9	ARMC9
ARMCX1
ARMCX2	ARMCX2	ARMCX2
ARMCX5	ARMCX5	ARMCX5
ARNT	ARNT	ARNT
ARNT2	ARNT2	ARNT2
ARNTL	ARNTL	ARNTL
ARRB1	ARRB1	ARRB1
ARRB1_ENST00000393505	ARRB1_ENST00000393505	ARRB1_ENST00000393505
ARSB	ARSB	ARSB
ARSD	ARSD	ARSD
ARSE
ARSE_ENST00000540563	ARSE_ENST00000540563	ARSE_ENST00000540563
ARSF	ARSF	ARSF
ARSG	ARSG	ARSG
ARSI	ARSI	ARSI
ARSJ	ARSJ	ARSJ
ARVCF
ASAP1	ASAP1	ASAP1
ASAP2	ASAP2	ASAP2
ASAP3	ASAP3	ASAP3
ASAP3_ENST00000437606	ASAP3_ENST00000437606	ASAP3_ENST00000437606
ASB10	ASB10	ASB10
ASB10_ENST00000420175	ASB10_ENST00000420175	ASB10_ENST00000420175
ASB10_ENST00000422024	ASB10_ENST00000422024	ASB10_ENST00000422024
ASB15_ENST00000451558	ASB15_ENST00000451558	ASB15_ENST00000451558
ASB17	ASB17	ASB17
ASB3	ASB3	ASB3
ASB4	ASB4	ASB4
ASL	ASL	ASL
ASNS	ASNS	ASNS
ASNS_ENST00000394309	ASNS_ENST00000394309	ASNS_ENST00000394309
ASPG	ASPG	ASPG
ASPH	ASPH	ASPH
ASPHD1	ASPHD1	ASPHD1
ASPM	ASPM	ASPM
ASS1	ASS1	ASS1
ASTL	ASTL	ASTL
ASTN1	ASTN1	ASTN1
ASTN1_ENST00000367654	ASTN1_ENST00000367654	ASTN1_ENST00000367654
ASTN2	ASTN2	ASTN2
ASTN2_ENST00000313400	ASTN2_ENST00000313400	ASTN2_ENST00000313400
ASXL3_ENST00000269197	ASXL3_ENST00000269197	ASXL3_ENST00000269197
ASZ1
ATAD3B	ATAD3B	ATAD3B
ATE1	ATE1	ATE1
ATE1_ENST00000224652
ATF2	ATF2	ATF2
ATF6B
ATF7	ATF7	ATF7
ATF7_ENST00000328463	ATF7_ENST00000328463	ATF7_ENST00000328463
ATG16L1	ATG16L1	ATG16L1
ATG2A	ATG2A	ATG2A
ATG2B	ATG2B	ATG2B
ATG4D	ATG4D	ATG4D
ATG7	ATG7	ATG7
ATL1	ATL1	ATL1
ATN1	ATN1	ATN1
ATP10B	ATP10B	ATP10B
ATP10D	ATP10D	ATP10D
ATP11C	ATP11C	ATP11C
ATP11C_ENST00000361648	ATP11C_ENST00000361648	ATP11C_ENST00000361648
ATP11C_ENST00000370543	ATP11C_ENST00000370543	ATP11C_ENST00000370543
ATP11C_ENST00000370557	ATP11C_ENST00000370557	ATP11C_ENST00000370557
ATP12A	ATP12A	ATP12A
ATP12A_ENST00000218548	ATP12A_ENST00000218548	ATP12A_ENST00000218548
ATP13A1	ATP13A1	ATP13A1
ATP13A1_ENST00000291503	ATP13A1_ENST00000291503	ATP13A1_ENST00000291503
ATP13A2	ATP13A2	ATP13A2
ATP13A2_ENST00000341676	ATP13A2_ENST00000341676	ATP13A2_ENST00000341676
ATP13A3	ATP13A3	ATP13A3
ATP13A4	ATP13A4	ATP13A4
ATP13A4_ENST00000295548	ATP13A4_ENST00000295548	ATP13A4_ENST00000295548
ATP13A5	ATP13A5	ATP13A5
ATP1A1	ATP1A1	ATP1A1
ATP1A2	ATP1A2	ATP1A2
ATP1A4	ATP1A4	ATP1A4
ATP1B4	ATP1B4	ATP1B4
ATP1B4_ENST00000218008	ATP1B4_ENST00000218008	ATP1B4_ENST00000218008
ATP2A2	ATP2A2	ATP2A2
ATP2A3	ATP2A3	ATP2A3
ATP2A3_ENST00000352011	ATP2A3_ENST00000352011	ATP2A3_ENST00000352011
ATP2B1	ATP2B1	ATP2B1
ATP2B1_ENST00000359142	ATP2B1_ENST00000359142	ATP2B1_ENST00000359142
ATP2B4	ATP2B4	ATP2B4
ATP2B4_ENST00000367218	ATP2B4_ENST00000367218	ATP2B4_ENST00000367218
ATP2C1	ATP2C1	ATP2C1
ATP2C1_ENST00000393221	ATP2C1_ENST00000393221	ATP2C1_ENST00000393221
ATP2C2	ATP2C2	ATP2C2
ATP4A	ATP4A	ATP4A
ATP5A1	ATP5A1	ATP5A1
ATP5B
ATP6AP1	ATP6AP1	ATP6AP1
ATP6V0A1	ATP6V0A1	ATP6V0A1
ATP6V0A1_ENST00000264649	ATP6V0A1_ENST00000264649	ATP6V0A1_ENST00000264649
ATP6V0A2	ATP6V0A2	ATP6V0A2
ATP6V0A4	ATP6V0A4	ATP6V0A4
ATP6V1C2_ENST00000272238
ATP6V1H_ENST00000359530	ATP6V1H_ENST00000359530	ATP6V1H_ENST00000359530
ATP7A	ATP7A	ATP7A
ATP7A_ENST00000341514	ATP7A_ENST00000341514	ATP7A_ENST00000341514
ATP7B	ATP7B	ATP7B
ATP8A1	ATP8A1	ATP8A1
ATP8A1_ENST00000264449	ATP8A1_ENST00000264449	ATP8A1_ENST00000264449
ATP8A2	ATP8A2	ATP8A2
ATP8B1	ATP8B1	ATP8B1
ATP8B2	ATP8B2	ATP8B2
ATP8B2_ENST00000368487	ATP8B2_ENST00000368487	ATP8B2_ENST00000368487
ATP8B3	ATP8B3	ATP8B3
ATP8B3_ENST00000525591	ATP8B3_ENST00000525591	ATP8B3_ENST00000525591
ATP8B4	ATP8B4	ATP8B4
ATP9B	ATP9B	ATP9B
ATRNL1	ATRNL1	ATRNL1
ATXN1	ATXN1	ATXN1
ATXN2	ATXN2	ATXN2
ATXN7	ATXN7	ATXN7
ATXN7_ENST00000398590	ATXN7_ENST00000398590	ATXN7_ENST00000398590
ATXN7L1_ENST00000419735	ATXN7L1_ENST00000419735	ATXN7L1_ENST00000419735
ATXN7L2	ATXN7L2	ATXN7L2
AURKB
AURKB_ENST00000316199
AURKC	AURKC	AURKC
AURKC_ENST00000302804	AURKC_ENST00000302804	AURKC_ENST00000302804
AUTS2	AUTS2	AUTS2
AVIL	AVIL	AVIL
AZGP1	AZGP1	AZGP1
AZI1	AZI1	AZI1
AZI1_ENST00000450824	AZI1_ENST00000450824	AZI1_ENST00000450824
B3GAT1	B3GAT1	B3GAT1
B3GAT2	B3GAT2	B3GAT2
B3GNT3	B3GNT3	B3GNT3
B3GNT7	B3GNT7	B3GNT7
B3GNT9	B3GNT9	B3GNT9
B3GNTL1	B3GNTL1	B3GNTL1
B4GALNT1	B4GALNT1	B4GALNT1
B4GALNT2	B4GALNT2	B4GALNT2
B4GALNT3	B4GALNT3	B4GALNT3
B4GALNT4	B4GALNT4	B4GALNT4
B4GALT5	B4GALT5	B4GALT5
BAAT	BAAT	BAAT
BACE1	BACE1	BACE1
BACE2	BACE2	BACE2
BACH2	BACH2	BACH2
BACH2_ENST00000257749	BACH2_ENST00000257749	BACH2_ENST00000257749
BAG3	BAG3	BAG3
BAG6_ENST00000404765	BAG6_ENST00000404765	BAG6_ENST00000404765
BAHCC1	BAHCC1	BAHCC1
BAHD1	BAHD1	BAHD1
BAI1	BAI1	BAI1
BAI2	BAI2	BAI2
BAI3	BAI3	BAI3
BAIAP2	BAIAP2	BAIAP2
BAIAP2_ENST00000321300	BAIAP2_ENST00000321300	BAIAP2_ENST00000321300
BAIAP2_ENST00000435091	BAIAP2_ENST00000435091	BAIAP2_ENST00000435091
BAIAP3	BAIAP3	BAIAP3
BAIAP3_ENST00000397488	BAIAP3_ENST00000397488	BAIAP3_ENST00000397488
BANK1	BANK1	BANK1
BANP	BANP	BANP
BANP_ENST00000355163	BANP_ENST00000355163	BANP_ENST00000355163
BANP_ENST00000393207	BANP_ENST00000393207	BANP_ENST00000393207
BARHL1	BARHL1	BARHL1
BASP1	BASP1	BASP1
BAZ1B	BAZ1B	BAZ1B
BAZ2A	BAZ2A	BAZ2A
BAZ2A_ENST00000379441	BAZ2A_ENST00000379441	BAZ2A_ENST00000379441
BAZ2A_ENST00000551812	BAZ2A_ENST00000551812	BAZ2A_ENST00000551812
BAZ2B	BAZ2B	BAZ2B
BBS1	BBS1	BBS1
BBS10	BBS10	BBS10
BBS12	BBS12	BBS12
BBS2	BBS2	BBS2
BBS7	BBS7	BBS7
BBS9	BBS9	BBS9
BBS9_ENST00000242067	BBS9_ENST00000242067	BBS9_ENST00000242067
BBS9_ENST00000354265
BBX_ENST00000325805
BCAM	BCAM	BCAM
BCAN_ENST00000361588	BCAN_ENST00000361588	BCAN_ENST00000361588
BCAR1	BCAR1	BCAR1
BCAR1_ENST00000393420	BCAR1_ENST00000393420	BCAR1_ENST00000393420
BCAR1_ENST00000393422	BCAR1_ENST00000393422	BCAR1_ENST00000393422
BCAR1_ENST00000418647	BCAR1_ENST00000418647	BCAR1_ENST00000418647
BCAR1_ENST00000420641	BCAR1_ENST00000420641	BCAR1_ENST00000420641
BCAR3_ENST00000370247
BCAS1	BCAS1	BCAS1
BCAS1_ENST00000371440	BCAS1_ENST00000371440	BCAS1_ENST00000371440
BCAS3	BCAS3	BCAS3
BCAS3_ENST00000589222	BCAS3_ENST00000589222	BCAS3_ENST00000589222
BCAT1	BCAT1	BCAT1
BCAT2	BCAT2	BCAT2
BCHE	BCHE	BCHE
BCKDHA	BCKDHA	BCKDHA
BCKDK	BCKDK	BCKDK
BCKDK_ENST00000394951	BCKDK_ENST00000394951	BCKDK_ENST00000394951
BCL11B	BCL11B	BCL11B
BCL2
BCL6B	BCL6B	BCL6B
BCL6B_ENST00000293805	BCL6B_ENST00000293805	BCL6B_ENST00000293805
BCL9_ENST00000234739	BCL9_ENST00000234739	BCL9_ENST00000234739
BCL9L_ENST00000334801	BCL9L_ENST00000334801	BCL9L_ENST00000334801
BCO2	BCO2	BCO2
BDP1	BDP1	BDP1
BEGAIN	BEGAIN	BEGAIN
BEND2	BEND2	BEND2
BEND2_ENST00000380030	BEND2_ENST00000380030	BEND2_ENST00000380030
BEND4	BEND4	BEND4
BEND5
BEND5_ENST00000371833	BEND5_ENST00000371833	BEND5_ENST00000371833
BEST3_ENST00000330891	BEST3_ENST00000330891	BEST3_ENST00000330891
BEST3_ENST00000331471	BEST3_ENST00000331471	BEST3_ENST00000331471
BFSP1	BFSP1	BFSP1
BFSP1_ENST00000377868
BFSP2	BFSP2	BFSP2
BHMT
BICD1	BICD1	BICD1
BICD2
BICD2_ENST00000375512
BIRC6	BIRC6	BIRC6
BIRC6_ENST00000421745	BIRC6_ENST00000421745	BIRC6_ENST00000421745
BIRC8	BIRC8	BIRC8
BLK	BLK	BLK
BLNK	BLNK	BLNK
BLNK_ENST00000427367	BLNK_ENST00000427367	BLNK_ENST00000427367
BMP1	BMP1	BMP1
BMP1_ENST00000306349	BMP1_ENST00000306349	BMP1_ENST00000306349
BMP1_ENST00000397814	BMP1_ENST00000397814	BMP1_ENST00000397814
BMP1_ENST00000397816	BMP1_ENST00000397816	BMP1_ENST00000397816
BMP10	BMP10	BMP10
BMP15	BMP15	BMP15
BMP2K_ENST00000335016	BMP2K_ENST00000335016	BMP2K_ENST00000335016
BMP2K_ENST00000502871	BMP2K_ENST00000502871	BMP2K_ENST00000502871
BMP3	BMP3	BMP3
BMP4	BMP4	BMP4
BMP5
BMPER	BMPER	BMPER
BMPR1B_ENST00000440890	BMPR1B_ENST00000440890	BMPR1B_ENST00000440890
BMS1	BMS1	BMS1
BMX	BMX	BMX
BNC1	BNC1	BNC1
BNC2	BNC2	BNC2
BNC2_ENST00000380666	BNC2_ENST00000380666	BNC2_ENST00000380666
BNC2_ENST00000411752	BNC2_ENST00000411752	BNC2_ENST00000411752
BNC2_ENST00000418777	BNC2_ENST00000418777	BNC2_ENST00000418777
BOC	BOC	BOC
BOD1L	BOD1L	BOD1L
BPIFB4	BPIFB4	BPIFB4
BPIL1	BPIL1	BPIL1
BPIL3	BPIL3	BPIL3
BPTF	BPTF	BPTF
BPTF_ENST00000335221	BPTF_ENST00000335221	BPTF_ENST00000335221
BRD1	BRD1	BRD1
BRD1_ENST00000342989	BRD1_ENST00000342989	BRD1_ENST00000342989
BRD2_ENST00000395289	BRD2_ENST00000395289	BRD2_ENST00000395289
BRD8	BRD8	BRD8
BRD8_ENST00000230901	BRD8_ENST00000230901	BRD8_ENST00000230901
BRD9	BRD9	BRD9
BRD9_ENST00000467963	BRD9_ENST00000467963	BRD9_ENST00000467963
BRDT	BRDT	BRDT
BRF1	BRF1	BRF1
BRF1_ENST00000440513	BRF1_ENST00000440513	BRF1_ENST00000440513
BRPF1	BRPF1	BRPF1
BRPF3	BRPF3	BRPF3
BRS3	BRS3	BRS3
BRSK1_ENST00000309383	BRSK1_ENST00000309383	BRSK1_ENST00000309383
BRSK2_ENST00000308219
BRSK2_ENST00000308230
BRSK2_ENST00000382179
BRWD3	BRWD3	BRWD3
BSG	BSG	BSG
BSN	BSN	BSN
BSND	BSND	BSND
BTAF1	BTAF1	BTAF1
BTBD11	BTBD11	BTBD11
BTBD11_ENST00000357167	BTBD11_ENST00000357167	BTBD11_ENST00000357167
BTBD11_ENST00000490090	BTBD11_ENST00000490090	BTBD11_ENST00000490090
BTBD16
BTBD3	BTBD3	BTBD3
BTBD9	BTBD9	BTBD9
BTBD9_ENST00000403056	BTBD9_ENST00000403056	BTBD9_ENST00000403056
BTN1A1	BTN1A1	BTN1A1
BTN2A1	BTN2A1	BTN2A1
BTN2A1_ENST00000265424	BTN2A1_ENST00000265424	BTN2A1_ENST00000265424
BTN2A2	BTN2A2	BTN2A2
BTN3A3	BTN3A3	BTN3A3
BTNL2
BTNL8_ENST00000340184	BTNL8_ENST00000340184	BTNL8_ENST00000340184
BTNL9	BTNL9	BTNL9
BTNL9_ENST00000376842	BTNL9_ENST00000376842	BTNL9_ENST00000376842
BUB1B	BUB1B	BUB1B
BUB1B_ENST00000412359	BUB1B_ENST00000412359	BUB1B_ENST00000412359
BVES	BVES	BVES
BZRAP1	BZRAP1	BZRAP1
BZRAP1_ENST00000355701	BZRAP1_ENST00000355701	BZRAP1_ENST00000355701
C10orf112	C10orf112	C10orf112
C10orf12	C10orf12	C10orf12
C10orf120	C10orf120	C10orf120
C10orf137	C10orf137	C10orf137
C10orf18	C10orf18	C10orf18
C10orf2
C10orf68_ENST00000375025
C10orf71_ENST00000323868	C10orf71_ENST00000323868	C10orf71_ENST00000323868
C10orf71_ENST00000374144	C10orf71_ENST00000374144	C10orf71_ENST00000374144
C10orf90	C10orf90	C10orf90
C10orf90_ENST00000368674	C10orf90_ENST00000368674	C10orf90_ENST00000368674
C10orf90_ENST00000544758	C10orf90_ENST00000544758	C10orf90_ENST00000544758
C10orf92	C10orf92	C10orf92
C10orf93_ENST00000368582	C10orf93_ENST00000368582	C10orf93_ENST00000368582
C11orf30	C11orf30	C11orf30
C11orf35	C11orf35	C11orf35
C11orf41	C11orf41	C11orf41
C11orf41_ENST00000321505	C11orf41_ENST00000321505	C11orf41_ENST00000321505
C11orf63	C11orf63	C11orf63
C11orf63_ENST00000307257	C11orf63_ENST00000307257	C11orf63_ENST00000307257
C11orf66
C11orf82	C11orf82	C11orf82
C12orf40	C12orf40	C12orf40
C12orf40_ENST00000398716	C12orf40_ENST00000398716	C12orf40_ENST00000398716
C12orf42	C12orf42	C12orf42
C12orf50
C12orf51	C12orf51	C12orf51
C12orf51_ENST00000377560	C12orf51_ENST00000377560	C12orf51_ENST00000377560
C12orf56	C12orf56	C12orf56
C12orf63	C12orf63	C12orf63
C13orf23	C13orf23	C13orf23
C13orf40	C13orf40	C13orf40
C14orf101	C14orf101	C14orf101
C14orf102	C14orf102	C14orf102
C14orf159	C14orf159	C14orf159
C14orf166B	C14orf166B	C14orf166B
C14orf21	C14orf21	C14orf21
C14orf37	C14orf37	C14orf37
C14orf38
C14orf49	C14orf49	C14orf49
C14orf50	C14orf50	C14orf50
C15orf2	C15orf2	C15orf2
C15orf39	C15orf39	C15orf39
C15orf39_ENST00000567617	C15orf39_ENST00000567617	C15orf39_ENST00000567617
C15orf42	C15orf42	C15orf42
C16orf62	C16orf62	C16orf62
C16orf62_ENST00000438132	C16orf62_ENST00000438132	C16orf62_ENST00000438132
C16orf62_ENST00000448695	C16orf62_ENST00000448695	C16orf62_ENST00000448695
C16orf7	C16orf7	C16orf7
C16orf71	C16orf71	C16orf71
C16orf78	C16orf78	C16orf78
C16orf89	C16orf89	C16orf89
C16orf96	C16orf96	C16orf96
C17orf101	C17orf101	C17orf101
C17orf47	C17orf47	C17orf47
C17orf53	C17orf53	C17orf53
C17orf56	C17orf56	C17orf56
C17orf74	C17orf74	C17orf74
C17orf80	C17orf80	C17orf80
C17orf97_ENST00000360127
C18orf1	C18orf1	C18orf1
C18orf8	C18orf8	C18orf8
C19orf2	C19orf2	C19orf2
C19orf21	C19orf21	C19orf21
C19orf26
C19orf28	C19orf28	C19orf28
C19orf29	C19orf29	C19orf29
C19orf29_ENST00000429344	C19orf29_ENST00000429344	C19orf29_ENST00000429344
C19orf44
C19orf51	C19orf51	C19orf51
C19orf55	C19orf55	C19orf55
C19orf57	C19orf57	C19orf57
C19orf6
C1orf101_ENST00000366534	C1orf101_ENST00000366534	C1orf101_ENST00000366534
C1orf112	C1orf112	C1orf112
C1orf116	C1orf116	C1orf116
C1orf127	C1orf127	C1orf127
C1orf127_ENST00000377004	C1orf127_ENST00000377004	C1orf127_ENST00000377004
C1orf129	C1orf129	C1orf129
C1orf129_ENST00000367759	C1orf129_ENST00000367759	C1orf129_ENST00000367759
C1orf150	C1orf150	C1orf150
C1orf167_ENST00000433342	C1orf167_ENST00000433342	C1orf167_ENST00000433342
C1orf168	C1orf168	C1orf168
C1orf172	C1orf172	C1orf172
C1orf173	C1orf173	C1orf173
C1orf173_ENST00000420661	C1orf173_ENST00000420661	C1orf173_ENST00000420661
C1orf177	C1orf177	C1orf177
C1orf65	C1orf65	C1orf65
C1orf87	C1orf87	C1orf87
C1R	C1R	C1R
C1RL	C1RL	C1RL
C1S	C1S	C1S
C20orf103	C20orf103	C20orf103
C20orf112	C20orf112	C20orf112
C20orf132_ENST00000400441	C20orf132_ENST00000400441	C20orf132_ENST00000400441
C20orf133	C20orf133	C20orf133
C20orf152	C20orf152	C20orf152
C20orf177	C20orf177	C20orf177
C20orf26	C20orf26	C20orf26
C20orf26_ENST00000377306	C20orf26_ENST00000377306	C20orf26_ENST00000377306
C20orf74	C20orf74	C20orf74
C2CD2	C2CD2	C2CD2
C2CD2L	C2CD2L	C2CD2L
C2CD3	C2CD3	C2CD3
C2CD3_ENST00000334126	C2CD3_ENST00000334126	C2CD3_ENST00000334126
C2orf16	C2orf16	C2orf16
C2orf16_ENST00000408964	C2orf16_ENST00000408964	C2orf16_ENST00000408964
C2orf42
C2orf44	C2orf44	C2orf44
C2orf55	C2orf55	C2orf55
C2orf57	C2orf57	C2orf57
C2orf71	C2orf71	C2orf71
C2orf77	C2orf77	C2orf77
C2orf77_ENST00000447353	C2orf77_ENST00000447353	C2orf77_ENST00000447353
C2orf78	C2orf78	C2orf78
C2orf78_ENST00000409561	C2orf78_ENST00000409561	C2orf78_ENST00000409561
C3	C3	C3
C3AR1	C3AR1	C3AR1
C3orf15	C3orf15	C3orf15
C3orf20	C3orf20	C3orf20
C3orf25	C3orf25	C3orf25
C3orf30	C3orf30	C3orf30
C3orf39	C3orf39	C3orf39
C3orf64
C3orf67_ENST00000482387	C3orf67_ENST00000482387	C3orf67_ENST00000482387
C3orf77	C3orf77	C3orf77
C4BPA	C4BPA	C4BPA
C4orf14	C4orf14	C4orf14
C4orf21	C4orf21	C4orf21
C4orf21_ENST00000505019	C4orf21_ENST00000505019	C4orf21_ENST00000505019
C4orf37	C4orf37	C4orf37
C4orf41	C4orf41	C4orf41
C4orf50_ENST00000531445	C4orf50_ENST00000531445	C4orf50_ENST00000531445
C5	C5	C5
C5orf65
C6	C6	C6
C6orf118	C6orf118	C6orf118
C6orf118_ENST00000543069	C6orf118_ENST00000543069	C6orf118_ENST00000543069
C6orf138	C6orf138	C6orf138
C6orf170	C6orf170	C6orf170
C6orf213	C6orf213	C6orf213
C6orf221	C6orf221	C6orf221
C6orf222	C6orf222	C6orf222
C6orf25
C6orf27	C6orf27	C6orf27
C6orf70	C6orf70	C6orf70
C6orf97	C6orf97	C6orf97
C7	C7	C7
C7_ENST00000313164	C7_ENST00000313164	C7_ENST00000313164
C7orf10	C7orf10	C7orf10
C7orf10_ENST00000309930	C7orf10_ENST00000309930	C7orf10_ENST00000309930
C7orf31	C7orf31	C7orf31
C7orf58
C7orf62	C7orf62	C7orf62
C8B	C8B	C8B
C8orf34	C8orf34	C8orf34
C8orf34_ENST00000518698	C8orf34_ENST00000518698	C8orf34_ENST00000518698
C8orf80	C8orf80	C8orf80
C9	C9	C9
C9orf102	C9orf102	C9orf102
C9orf125	C9orf125	C9orf125
C9orf171	C9orf171	C9orf171
C9orf172	C9orf172	C9orf172
C9orf174	C9orf174	C9orf174
C9orf174_ENST00000395220	C9orf174_ENST00000395220	C9orf174_ENST00000395220
C9orf3	C9orf3	C9orf3
C9orf3_ENST00000375315	C9orf3_ENST00000375315	C9orf3_ENST00000375315
C9orf43	C9orf43	C9orf43
C9orf48	C9orf48	C9orf48
C9orf5	C9orf5	C9orf5
C9orf50	C9orf50	C9orf50
C9orf79	C9orf79	C9orf79
C9orf84	C9orf84	C9orf84
C9orf84_ENST00000374287	C9orf84_ENST00000374287	C9orf84_ENST00000374287
C9orf86	C9orf86	C9orf86
C9orf86_ENST00000371663	C9orf86_ENST00000371663	C9orf86_ENST00000371663
C9orf93	C9orf93	C9orf93
C9orf93_ENST00000380689
C9orf96
C9orf96_ENST00000371957
C9orf98_ENST00000298545	C9orf98_ENST00000298545	C9orf98_ENST00000298545
CA10	CA10	CA10
CA10_ENST00000340813	CA10_ENST00000340813	CA10_ENST00000340813
CA8	CA8	CA8
CA9	CA9	CA9
CABIN1	CABIN1	CABIN1
CABP4	CABP4	CABP4
CABS1	CABS1	CABS1
CACHD1	CACHD1	CACHD1
CACHD1_ENST00000371073	CACHD1_ENST00000371073	CACHD1_ENST00000371073
CACNA1A	CACNA1A	CACNA1A
CACNA1A_ENST00000325084	CACNA1A_ENST00000325084	CACNA1A_ENST00000325084
CACNA1A_ENST00000357018	CACNA1A_ENST00000357018	CACNA1A_ENST00000357018
CACNA1A_ENST00000360228	CACNA1A_ENST00000360228	CACNA1A_ENST00000360228
CACNA1B_ENST00000277549	CACNA1B_ENST00000277549	CACNA1B_ENST00000277549
CACNA1B_ENST00000371355	CACNA1B_ENST00000371355	CACNA1B_ENST00000371355
CACNA1D	CACNA1D	CACNA1D
CACNA1D_ENST00000350061	CACNA1D_ENST00000350061	CACNA1D_ENST00000350061
CACNA1E	CACNA1E	CACNA1E
CACNA1E_ENST00000357570	CACNA1E_ENST00000357570	CACNA1E_ENST00000357570
CACNA1E_ENST00000358338	CACNA1E_ENST00000358338	CACNA1E_ENST00000358338
CACNA1E_ENST00000367567	CACNA1E_ENST00000367567	CACNA1E_ENST00000367567
CACNA1E_ENST00000367573	CACNA1E_ENST00000367573	CACNA1E_ENST00000367573
CACNA1F	CACNA1F	CACNA1F
CACNA1G	CACNA1G	CACNA1G
CACNA1G_ENST00000354983	CACNA1G_ENST00000354983	CACNA1G_ENST00000354983
CACNA1G_ENST00000359106	CACNA1G_ENST00000359106	CACNA1G_ENST00000359106
CACNA1G_ENST00000416767	CACNA1G_ENST00000416767	CACNA1G_ENST00000416767
CACNA1H	CACNA1H	CACNA1H
CACNA1H_ENST00000348261	CACNA1H_ENST00000348261	CACNA1H_ENST00000348261
CACNA1H_ENST00000358590	CACNA1H_ENST00000358590	CACNA1H_ENST00000358590
CACNA1I	CACNA1I	CACNA1I
CACNA1I_ENST00000336649	CACNA1I_ENST00000336649	CACNA1I_ENST00000336649
CACNA1I_ENST00000400164	CACNA1I_ENST00000400164	CACNA1I_ENST00000400164
CACNA1I_ENST00000402142	CACNA1I_ENST00000402142	CACNA1I_ENST00000402142
CACNA2D1_ENST00000356253	CACNA2D1_ENST00000356253	CACNA2D1_ENST00000356253
CACNA2D2	CACNA2D2	CACNA2D2
CACNA2D4_ENST00000382722	CACNA2D4_ENST00000382722	CACNA2D4_ENST00000382722
CACNB2	CACNB2	CACNB2
CACNB2_ENST00000282343	CACNB2_ENST00000282343	CACNB2_ENST00000282343
CACNB2_ENST00000352115	CACNB2_ENST00000352115	CACNB2_ENST00000352115
CACNB2_ENST00000377315	CACNB2_ENST00000377315	CACNB2_ENST00000377315
CACNB2_ENST00000377319	CACNB2_ENST00000377319	CACNB2_ENST00000377319
CACNB2_ENST00000377329	CACNB2_ENST00000377329	CACNB2_ENST00000377329
CACNB3	CACNB3	CACNB3
CACNB4	CACNB4	CACNB4
CACNB4_ENST00000339254	CACNB4_ENST00000339254	CACNB4_ENST00000339254
CACNB4_ENST00000534999	CACNB4_ENST00000534999	CACNB4_ENST00000534999
CACNB4_ENST00000539935	CACNB4_ENST00000539935	CACNB4_ENST00000539935
CACNG3	CACNG3	CACNG3
CACNG5_ENST00000533854	CACNG5_ENST00000533854	CACNG5_ENST00000533854
CACNG7	CACNG7	CACNG7
CAD	CAD	CAD
CADM1	CADM1	CADM1
CADM2_ENST00000383699	CADM2_ENST00000383699	CADM2_ENST00000383699
CADM3	CADM3	CADM3
CADPS	CADPS	CADPS
CADPS_ENST00000383710	CADPS_ENST00000383710	CADPS_ENST00000383710
CADPS2	CADPS2	CADPS2
CADPS2_ENST00000313070	CADPS2_ENST00000313070	CADPS2_ENST00000313070
CAGE1	CAGE1	CAGE1
CAGE1_ENST00000338150	CAGE1_ENST00000338150	CAGE1_ENST00000338150
CAGE1_ENST00000502583	CAGE1_ENST00000502583	CAGE1_ENST00000502583
CALCOCO1	CALCOCO1	CALCOCO1
CALCR	CALCR	CALCR
CALCR_ENST00000359558	CALCR_ENST00000359558	CALCR_ENST00000359558
CALCRL	CALCRL	CALCRL
CALD1	CALD1	CALD1
CALN1	CALN1	CALN1
CALN1_ENST00000395275	CALN1_ENST00000395275	CALN1_ENST00000395275
CALR	CALR	CALR
CALR3	CALR3	CALR3
CAMK1D	CAMK1D	CAMK1D
CAMK1D_ENST00000378847	CAMK1D_ENST00000378847	CAMK1D_ENST00000378847
CAMK2A	CAMK2A	CAMK2A
CAMK2B
CAMK2G	CAMK2G	CAMK2G
CAMK2G_ENST00000322635	CAMK2G_ENST00000322635	CAMK2G_ENST00000322635
CAMK2G_ENST00000322680	CAMK2G_ENST00000322680	CAMK2G_ENST00000322680
CAMK4	CAMK4	CAMK4
CAMKK1	CAMKK1	CAMKK1
CAMKK1_ENST00000158166	CAMKK1_ENST00000158166	CAMKK1_ENST00000158166
CAMKK2	CAMKK2	CAMKK2
CAMKK2_ENST00000392473	CAMKK2_ENST00000392473	CAMKK2_ENST00000392473
CAMKK2_ENST00000392474	CAMKK2_ENST00000392474	CAMKK2_ENST00000392474
CAMKV	CAMKV	CAMKV
CAMKV_ENST00000477224	CAMKV_ENST00000477224	CAMKV_ENST00000477224
CAMSAP1	CAMSAP1	CAMSAP1
CAMSAP1_ENST00000409386	CAMSAP1_ENST00000409386	CAMSAP1_ENST00000409386
CAMSAP3	CAMSAP3	CAMSAP3
CAMSAP3_ENST00000446248	CAMSAP3_ENST00000446248	CAMSAP3_ENST00000446248
CAMTA1_ENST00000439411	CAMTA1_ENST00000439411	CAMTA1_ENST00000439411
CAMTA2	CAMTA2	CAMTA2
CAMTA2_ENST00000381311	CAMTA2_ENST00000381311	CAMTA2_ENST00000381311
CAMTA2_ENST00000414043	CAMTA2_ENST00000414043	CAMTA2_ENST00000414043
CAND1	CAND1	CAND1
CAND2_ENST00000456430	CAND2_ENST00000456430	CAND2_ENST00000456430
CANT1	CANT1	CANT1
CAP2	CAP2	CAP2
CAPN10_ENST00000391984	CAPN10_ENST00000391984	CAPN10_ENST00000391984
CAPN11	CAPN11	CAPN11
CAPN12	CAPN12	CAPN12
CAPN13	CAPN13	CAPN13
CAPN14	CAPN14	CAPN14
CAPN14_ENST00000444918	CAPN14_ENST00000444918	CAPN14_ENST00000444918
CAPN2	CAPN2	CAPN2
CAPN3	CAPN3	CAPN3
CAPN3_ENST00000318023	CAPN3_ENST00000318023	CAPN3_ENST00000318023
CAPN3_ENST00000356316	CAPN3_ENST00000356316	CAPN3_ENST00000356316
CAPN3_ENST00000397163	CAPN3_ENST00000397163	CAPN3_ENST00000397163
CAPN5	CAPN5	CAPN5
CAPN6	CAPN6	CAPN6
CAPN9	CAPN9	CAPN9
CAPN9_ENST00000271971	CAPN9_ENST00000271971	CAPN9_ENST00000271971
CAPRIN2
CARD10	CARD10	CARD10
CARD14	CARD14	CARD14
CARD6	CARD6	CARD6
CARD8_ENST00000391898	CARD8_ENST00000391898	CARD8_ENST00000391898
CARM1	CARM1	CARM1
CARS2
CASC1	CASC1	CASC1
CASC1_ENST00000354189
CASC3	CASC3	CASC3
CASC5	CASC5	CASC5
CASC5_ENST00000346991	CASC5_ENST00000346991	CASC5_ENST00000346991
CASK
CASK_ENST00000318588
CASKIN1	CASKIN1	CASKIN1
CASKIN1_ENST00000382453	CASKIN1_ENST00000382453	CASKIN1_ENST00000382453
CASKIN2	CASKIN2	CASKIN2
CASP2	CASP2	CASP2
CASP5	CASP5	CASP5
CASP8AP2	CASP8AP2	CASP8AP2
CASQ1	CASQ1	CASQ1
CASQ2	CASQ2	CASQ2
CASR	CASR	CASR
CASS4	CASS4	CASS4
CASZ1	CASZ1	CASZ1
CATSPER1	CATSPER1	CATSPER1
CATSPER2	CATSPER2	CATSPER2
CATSPER4	CATSPER4	CATSPER4
CATSPERB	CATSPERB	CATSPERB
CATSPERB_ENST00000256343	CATSPERB_ENST00000256343	CATSPERB_ENST00000256343
CATSPERG	CATSPERG	CATSPERG
CATSPERG_ENST00000409235	CATSPERG_ENST00000409235	CATSPERG_ENST00000409235
CBFA2T2	CBFA2T2	CBFA2T2
CBFA2T2_ENST00000342704	CBFA2T2_ENST00000342704	CBFA2T2_ENST00000342704
CBFA2T3	CBFA2T3	CBFA2T3
CBLB	CBLB	CBLB
CBLB_ENST00000394027	CBLB_ENST00000394027	CBLB_ENST00000394027
CBLN2	CBLN2	CBLN2
CBX8	CBX8	CBX8
CC2D1A	CC2D1A	CC2D1A
CC2D1B	CC2D1B	CC2D1B
CC2D2A	CC2D2A	CC2D2A
CC2D2A_ENST00000424120	CC2D2A_ENST00000424120	CC2D2A_ENST00000424120
CCBE1	CCBE1	CCBE1
CCBL2	CCBL2	CCBL2
CCDC102A	CCDC102A	CCDC102A
CCDC102B
CCDC102B_ENST00000358653
CCDC105	CCDC105	CCDC105
CCDC108	CCDC108	CCDC108
CCDC11
CCDC110	CCDC110	CCDC110
CCDC111	CCDC111	CCDC111
CCDC120	CCDC120	CCDC120
CCDC129	CCDC129	CCDC129
CCDC129_ENST00000451887	CCDC129_ENST00000451887	CCDC129_ENST00000451887
CCDC13	CCDC13	CCDC13
CCDC135	CCDC135	CCDC135
CCDC136	CCDC136	CCDC136
CCDC136_ENST00000297788	CCDC136_ENST00000297788	CCDC136_ENST00000297788
CCDC138	CCDC138	CCDC138
CCDC141	CCDC141	CCDC141
CCDC141_ENST00000420890	CCDC141_ENST00000420890	CCDC141_ENST00000420890
CCDC144A	CCDC144A	CCDC144A
CCDC144A_ENST00000456009
CCDC144B
CCDC146	CCDC146	CCDC146
CCDC147	CCDC147	CCDC147
CCDC150	CCDC150	CCDC150
CCDC151	CCDC151	CCDC151
CCDC155	CCDC155	CCDC155
CCDC157	CCDC157	CCDC157
CCDC157_ENST00000405659	CCDC157_ENST00000405659	CCDC157_ENST00000405659
CCDC158	CCDC158	CCDC158
CCDC164	CCDC164	CCDC164
CCDC165	CCDC165	CCDC165
CCDC166	CCDC166	CCDC166
CCDC33	CCDC33	CCDC33
CCDC33_ENST00000321288	CCDC33_ENST00000321288	CCDC33_ENST00000321288
CCDC37	CCDC37	CCDC37
CCDC38	CCDC38	CCDC38
CCDC39	CCDC39	CCDC39
CCDC39_ENST00000442201	CCDC39_ENST00000442201	CCDC39_ENST00000442201
CCDC40	CCDC40	CCDC40
CCDC40_ENST00000269318	CCDC40_ENST00000269318	CCDC40_ENST00000269318
CCDC40_ENST00000374877	CCDC40_ENST00000374877	CCDC40_ENST00000374877
CCDC50
CCDC54	CCDC54	CCDC54
CCDC57	CCDC57	CCDC57
CCDC57_ENST00000389641	CCDC57_ENST00000389641	CCDC57_ENST00000389641
CCDC60	CCDC60	CCDC60
CCDC62	CCDC62	CCDC62
CCDC62_ENST00000253079	CCDC62_ENST00000253079	CCDC62_ENST00000253079
CCDC63	CCDC63	CCDC63
CCDC64	CCDC64	CCDC64
CCDC64B	CCDC64B	CCDC64B
CCDC71
CCDC8	CCDC8	CCDC8
CCDC80	CCDC80	CCDC80
CCDC81	CCDC81	CCDC81
CCDC81_ENST00000445632	CCDC81_ENST00000445632	CCDC81_ENST00000445632
CCDC83	CCDC83	CCDC83
CCDC85A	CCDC85A	CCDC85A
CCDC87	CCDC87	CCDC87
CCDC88B	CCDC88B	CCDC88B
CCDC88B_ENST00000359902	CCDC88B_ENST00000359902	CCDC88B_ENST00000359902
CCDC88C	CCDC88C	CCDC88C
CCDC88C_ENST00000389857	CCDC88C_ENST00000389857	CCDC88C_ENST00000389857
CCDC93	CCDC93	CCDC93
CCDC96	CCDC96	CCDC96
CCDC99	CCDC99	CCDC99
CCHCR1
CCIN	CCIN	CCIN
CCKAR	CCKAR	CCKAR
CCM2	CCM2	CCM2
CCNA1	CCNA1	CCNA1
CCNB3	CCNB3	CCNB3
CCNL1	CCNL1	CCNL1
CCNL2	CCNL2	CCNL2
CCNT1	CCNT1	CCNT1
CCNT2	CCNT2	CCNT2
CCNT2_ENST00000264157	CCNT2_ENST00000264157	CCNT2_ENST00000264157
CCP110	CCP110	CCP110
CCR3	CCR3	CCR3
CCR3_ENST00000545097	CCR3_ENST00000545097	CCR3_ENST00000545097
CCR5	CCR5	CCR5
CCR9	CCR9	CCR9
CCT5	CCT5	CCT5
CCT6B	CCT6B	CCT6B
CCT8	CCT8	CCT8
CCT8L2	CCT8L2	CCT8L2
CD101	CD101	CD101
CD109	CD109	CD109
CD163	CD163	CD163
CD163_ENST00000396620	CD163_ENST00000396620	CD163_ENST00000396620
CD163L1	CD163L1	CD163L1
CD180	CD180	CD180
CD19	CD19	CD19
CD1A	CD1A	CD1A
CD1B	CD1B	CD1B
CD1C	CD1C	CD1C
CD1E
CD1E_ENST00000434258
CD2	CD2	CD2
CD200R1L	CD200R1L	CD200R1L
CD209	CD209	CD209
CD209_ENST00000315599	CD209_ENST00000315599	CD209_ENST00000315599
CD209_ENST00000601951	CD209_ENST00000601951	CD209_ENST00000601951
CD22	CD22	CD22
CD226	CD226	CD226
CD248	CD248	CD248
CD276	CD276	CD276
CD2AP	CD2AP	CD2AP
CD300LG	CD300LG	CD300LG
CD33	CD33	CD33
CD36	CD36	CD36
CD36_ENST00000433696	CD36_ENST00000433696	CD36_ENST00000433696
CD36_ENST00000435819	CD36_ENST00000435819	CD36_ENST00000435819
CD36_ENST00000447544	CD36_ENST00000447544	CD36_ENST00000447544
CD44	CD44	CD44
CD5	CD5	CD5
CD5L	CD5L	CD5L
CD6	CD6	CD6
CD6_ENST00000313421	CD6_ENST00000313421	CD6_ENST00000313421
CD84	CD84	CD84
CD84_ENST00000311224	CD84_ENST00000311224	CD84_ENST00000311224
CD86
CD96	CD96	CD96
CDAN1	CDAN1	CDAN1
CDC27	CDC27	CDC27
CDC27_ENST00000531206	CDC27_ENST00000531206	CDC27_ENST00000531206
CDC37	CDC37	CDC37
CDC42BPA_ENST00000334218	CDC42BPA_ENST00000334218	CDC42BPA_ENST00000334218
CDC42BPA_ENST00000366765	CDC42BPA_ENST00000366765	CDC42BPA_ENST00000366765
CDC42BPA_ENST00000366766	CDC42BPA_ENST00000366766	CDC42BPA_ENST00000366766
CDC42BPB	CDC42BPB	CDC42BPB
CDC42BPG_ENST00000342711	CDC42BPG_ENST00000342711	CDC42BPG_ENST00000342711
CDC45	CDC45	CDC45
CDC45_ENST00000437685	CDC45_ENST00000437685	CDC45_ENST00000437685
CDCA2	CDCA2	CDCA2
CDCP1	CDCP1	CDCP1
CDH10	CDH10	CDH10
CDH12	CDH12	CDH12
CDH13	CDH13	CDH13
CDH13_ENST00000268613	CDH13_ENST00000268613	CDH13_ENST00000268613
CDH15	CDH15	CDH15
CDH16	CDH16	CDH16
CDH17	CDH17	CDH17
CDH18	CDH18	CDH18
CDH18_ENST00000507958	CDH18_ENST00000507958	CDH18_ENST00000507958
CDH19
CDH2	CDH2	CDH2
CDH20	CDH20	CDH20
CDH22	CDH22	CDH22
CDH23	CDH23	CDH23
CDH23_ENST00000398809
CDH23_ENST00000461841
CDH24	CDH24	CDH24
CDH24_ENST00000397359	CDH24_ENST00000397359	CDH24_ENST00000397359
CDH3_ENST00000429102	CDH3_ENST00000429102	CDH3_ENST00000429102
CDH4	CDH4	CDH4
CDH5	CDH5	CDH5
CDH6	CDH6	CDH6
CDH7	CDH7	CDH7
CDH7_ENST00000323011	CDH7_ENST00000323011	CDH7_ENST00000323011
CDH8	CDH8	CDH8
CDH9	CDH9	CDH9
CDHR1	CDHR1	CDHR1
CDHR1_ENST00000332904	CDHR1_ENST00000332904	CDHR1_ENST00000332904
CDHR2	CDHR2	CDHR2
CDHR4	CDHR4	CDHR4
CDHR5	CDHR5	CDHR5
CDK11A	CDK11A	CDK11A
CDK13	CDK13	CDK13
CDK14	CDK14	CDK14
CDK14_ENST00000380050	CDK14_ENST00000380050	CDK14_ENST00000380050
CDK19	CDK19	CDK19
CDK5RAP1	CDK5RAP1	CDK5RAP1
CDK5RAP2	CDK5RAP2	CDK5RAP2
CDK6	CDK6	CDK6
CDKL5	CDKL5	CDKL5
CDKN2A_ENST00000361570	CDKN2A_ENST00000361570	CDKN2A_ENST00000361570
CDON	CDON	CDON
CDR1	CDR1	CDR1
CDS1
CDYL	CDYL	CDYL
CDYL2	CDYL2	CDYL2
CEACAM20	CEACAM20	CEACAM20
CEACAM5	CEACAM5	CEACAM5
CEACAM6	CEACAM6	CEACAM6
CEACAM7	CEACAM7	CEACAM7
CEACAM8	CEACAM8	CEACAM8
CECR1	CECR1	CECR1
CECR2	CECR2	CECR2
CECR2_ENST00000262608	CECR2_ENST00000262608	CECR2_ENST00000262608
CECR5	CECR5	CECR5
CECR5_ENST00000155674	CECR5_ENST00000155674	CECR5_ENST00000155674
CEL	CEL	CEL
CELF1	CELF1	CELF1
CELF1_ENST00000395292	CELF1_ENST00000395292	CELF1_ENST00000395292
CELF3	CELF3	CELF3
CELF4	CELF4	CELF4
CELF6	CELF6	CELF6
CELSR2	CELSR2	CELSR2
CELSR3	CELSR3	CELSR3
CELSR3_ENST00000544264	CELSR3_ENST00000544264	CELSR3_ENST00000544264
CENPB	CENPB	CENPB
CENPE
CENPF	CENPF	CENPF
CENPJ	CENPJ	CENPJ
CEP104	CEP104	CEP104
CEP112	CEP112	CEP112
CEP112_ENST00000392769	CEP112_ENST00000392769	CEP112_ENST00000392769
CEP120	CEP120	CEP120
CEP128
CEP152	CEP152	CEP152
CEP152_ENST00000380950	CEP152_ENST00000380950	CEP152_ENST00000380950
CEP164	CEP164	CEP164
CEP192	CEP192	CEP192
CEP192_ENST00000506447	CEP192_ENST00000506447	CEP192_ENST00000506447
CEP250	CEP250	CEP250
CEP350	CEP350	CEP350
CEP63	CEP63	CEP63
CEP68	CEP68	CEP68
CEP70	CEP70	CEP70
CEP72	CEP72	CEP72
CEP76	CEP76	CEP76
CEP78	CEP78	CEP78
CEP78_ENST00000376597	CEP78_ENST00000376597	CEP78_ENST00000376597
CEP85L	CEP85L	CEP85L
CEP89	CEP89	CEP89
CEP97	CEP97	CEP97
CEP97_ENST00000327230	CEP97_ENST00000327230	CEP97_ENST00000327230
CER1	CER1	CER1
CERCAM	CERCAM	CERCAM
CERKL	CERKL	CERKL
CERKL_ENST00000339098	CERKL_ENST00000339098	CERKL_ENST00000339098
CES1_ENST00000360526	CES1_ENST00000360526	CES1_ENST00000360526
CES3	CES3	CES3
CES4A
CES4A_ENST00000326686	CES4A_ENST00000326686	CES4A_ENST00000326686
CFB	CFB	CFB
CFH	CFH	CFH
CFHR1	CFHR1	CFHR1
CFHR2_ENST00000367415	CFHR2_ENST00000367415	CFHR2_ENST00000367415
CFHR4	CFHR4	CFHR4
CFHR5
CFHR5_ENST00000367414
CFTR	CFTR	CFTR
CGN	CGN	CGN
CGNL1	CGNL1	CGNL1
CHAD	CHAD	CHAD
CHAF1A	CHAF1A	CHAF1A
CHAF1B	CHAF1B	CHAF1B
CHAT	CHAT	CHAT
CHAT_ENST00000395562	CHAT_ENST00000395562	CHAT_ENST00000395562
CHD3	CHD3	CHD3
CHD4	CHD4	CHD4
CHD4_ENST00000309577	CHD4_ENST00000309577	CHD4_ENST00000309577
CHD4_ENST00000357008	CHD4_ENST00000357008	CHD4_ENST00000357008
CHD6	CHD6	CHD6
CHD7	CHD7	CHD7
CHD9	CHD9	CHD9
CHDH	CHDH	CHDH
CHERP	CHERP	CHERP
CHFR	CHFR	CHFR
CHGB	CHGB	CHGB
CHI3L1
CHIA	CHIA	CHIA
CHIA_ENST00000369740	CHIA_ENST00000369740	CHIA_ENST00000369740
CHIT1	CHIT1	CHIT1
CHL1	CHL1	CHL1
CHML	CHML	CHML
CHN1	CHN1	CHN1
CHN2	CHN2	CHN2
CHN2_ENST00000539406	CHN2_ENST00000539406	CHN2_ENST00000539406
CHPF2	CHPF2	CHPF2
CHRD	CHRD	CHRD
CHRD_ENST00000342610	CHRD_ENST00000342610	CHRD_ENST00000342610
CHRDL2
CHRM1	CHRM1	CHRM1
CHRM2	CHRM2	CHRM2
CHRM3	CHRM3	CHRM3
CHRM5	CHRM5	CHRM5
CHRNA1	CHRNA1	CHRNA1
CHRNA10	CHRNA10	CHRNA10
CHRNA3
CHRNA5	CHRNA5	CHRNA5
CHRNA6	CHRNA6	CHRNA6
CHRNA9	CHRNA9	CHRNA9
CHRNB3	CHRNB3	CHRNB3
CHRNB4	CHRNB4	CHRNB4
CHRND	CHRND	CHRND
CHST1	CHST1	CHST1
CHST13	CHST13	CHST13
CHST2	CHST2	CHST2
CHST5_ENST00000541075	CHST5_ENST00000541075	CHST5_ENST00000541075
CHST6	CHST6	CHST6
CHST8	CHST8	CHST8
CHST9	CHST9	CHST9
CHST9_ENST00000284224	CHST9_ENST00000284224	CHST9_ENST00000284224
CHSY1	CHSY1	CHSY1
CHSY3	CHSY3	CHSY3
CHTF18	CHTF18	CHTF18
CHTF18_ENST00000455171	CHTF18_ENST00000455171	CHTF18_ENST00000455171
CIITA_ENST00000324288	CIITA_ENST00000324288	CIITA_ENST00000324288
CILP	CILP	CILP
CILP2	CILP2	CILP2
CIR1
CIRH1A	CIRH1A	CIRH1A
CIT_ENST00000261833	CIT_ENST00000261833	CIT_ENST00000261833
CIT_ENST00000392521	CIT_ENST00000392521	CIT_ENST00000392521
CKAP2L	CKAP2L	CKAP2L
CKAP4	CKAP4	CKAP4
CKAP5	CKAP5	CKAP5
CKM
CLASP1	CLASP1	CLASP1
CLASP1_ENST00000397587	CLASP1_ENST00000397587	CLASP1_ENST00000397587
CLASP1_ENST00000455322	CLASP1_ENST00000455322	CLASP1_ENST00000455322
CLASP1_ENST00000541859	CLASP1_ENST00000541859	CLASP1_ENST00000541859
CLASP1_ENST00000545861	CLASP1_ENST00000545861	CLASP1_ENST00000545861
CLASP2	CLASP2	CLASP2
CLASP2_ENST00000480013	CLASP2_ENST00000480013	CLASP2_ENST00000480013
CLASRP	CLASRP	CLASRP
CLCA1	CLCA1	CLCA1
CLCA2	CLCA2	CLCA2
CLCA4	CLCA4	CLCA4
CLCN1	CLCN1	CLCN1
CLCN2	CLCN2	CLCN2
CLCN4	CLCN4	CLCN4
CLCN5	CLCN5	CLCN5
CLCN5_ENST00000376088	CLCN5_ENST00000376088	CLCN5_ENST00000376088
CLCN6	CLCN6	CLCN6
CLCNKA	CLCNKA	CLCNKA
CLCNKB	CLCNKB	CLCNKB
CLCNKB_ENST00000375667	CLCNKB_ENST00000375667	CLCNKB_ENST00000375667
CLEC14A	CLEC14A	CLEC14A
CLEC16A
CLEC16A_ENST00000409552	CLEC16A_ENST00000409552	CLEC16A_ENST00000409552
CLEC3A	CLEC3A	CLEC3A
CLEC4F	CLEC4F	CLEC4F
CLEC4M	CLEC4M	CLEC4M
CLIC5_ENST00000185206	CLIC5_ENST00000185206	CLIC5_ENST00000185206
CLIC6	CLIC6	CLIC6
CLINT1
CLINT1_ENST00000523094
CLIP1	CLIP1	CLIP1
CLIP1_ENST00000540338	CLIP1_ENST00000540338	CLIP1_ENST00000540338
CLIP2	CLIP2	CLIP2
CLIP2_ENST00000223398	CLIP2_ENST00000223398	CLIP2_ENST00000223398
CLIP3	CLIP3	CLIP3
CLIP4	CLIP4	CLIP4
CLK1	CLK1	CLK1
CLK1_ENST00000434813	CLK1_ENST00000434813	CLK1_ENST00000434813
CLK2	CLK2	CLK2
CLK3	CLK3	CLK3
CLK3_ENST00000454830	CLK3_ENST00000454830	CLK3_ENST00000454830
CLMN	CLMN	CLMN
CLN3	CLN3	CLN3
CLNK	CLNK	CLNK
CLNK_ENST00000226951	CLNK_ENST00000226951	CLNK_ENST00000226951
CLP1	CLP1	CLP1
CLPB	CLPB	CLPB
CLPTM1	CLPTM1	CLPTM1
CLPTM1L	CLPTM1L	CLPTM1L
CLPX	CLPX	CLPX
CLSTN1	CLSTN1	CLSTN1
CLSTN2	CLSTN2	CLSTN2
CLSTN3	CLSTN3	CLSTN3
CLTC_ENST00000269122	CLTC_ENST00000269122	CLTC_ENST00000269122
CLTCL1	CLTCL1	CLTCL1
CLTCL1_ENST00000427926	CLTCL1_ENST00000427926	CLTCL1_ENST00000427926
CLU	CLU	CLU
CLUL1	CLUL1	CLUL1
CLVS2	CLVS2	CLVS2
CMIP	CMIP	CMIP
CMKLR1	CMKLR1	CMKLR1
CMYA5	CMYA5	CMYA5
CMYA5_ENST00000446378	CMYA5_ENST00000446378	CMYA5_ENST00000446378
CNBD1	CNBD1	CNBD1
CNBD1_ENST00000518476	CNBD1_ENST00000518476	CNBD1_ENST00000518476
CNDP1	CNDP1	CNDP1
CNDP2	CNDP2	CNDP2
CNGA1	CNGA1	CNGA1
CNGA2	CNGA2	CNGA2
CNGA3	CNGA3	CNGA3
CNGA4	CNGA4	CNGA4
CNGB1	CNGB1	CNGB1
CNGB3	CNGB3	CNGB3
CNKSR1	CNKSR1	CNKSR1
CNKSR2	CNKSR2	CNKSR2
CNKSR2_ENST00000279451	CNKSR2_ENST00000279451	CNKSR2_ENST00000279451
CNNM1	CNNM1	CNNM1
CNNM1_ENST00000356713	CNNM1_ENST00000356713	CNNM1_ENST00000356713
CNNM2_ENST00000369878	CNNM2_ENST00000369878	CNNM2_ENST00000369878
CNNM3	CNNM3	CNNM3
CNNM4	CNNM4	CNNM4
CNOT1	CNOT1	CNOT1
CNOT1_ENST00000441024	CNOT1_ENST00000441024	CNOT1_ENST00000441024
CNOT2	CNOT2	CNOT2
CNOT3	CNOT3	CNOT3
CNOT4	CNOT4	CNOT4
CNOT4_ENST00000262563	CNOT4_ENST00000262563	CNOT4_ENST00000262563
CNOT4_ENST00000315544	CNOT4_ENST00000315544	CNOT4_ENST00000315544
CNOT4_ENST00000414802
CNOT4_ENST00000541284	CNOT4_ENST00000541284	CNOT4_ENST00000541284
CNTLN_ENST00000380641	CNTLN_ENST00000380641	CNTLN_ENST00000380641
CNTN1	CNTN1	CNTN1
CNTN2	CNTN2	CNTN2
CNTN3	CNTN3	CNTN3
CNTN4	CNTN4	CNTN4
CNTN4_ENST00000418658	CNTN4_ENST00000418658	CNTN4_ENST00000418658
CNTN5	CNTN5	CNTN5
CNTN5_ENST00000524871	CNTN5_ENST00000524871	CNTN5_ENST00000524871
CNTNAP1	CNTNAP1	CNTNAP1
CNTNAP2	CNTNAP2	CNTNAP2
CNTNAP3	CNTNAP3	CNTNAP3
CNTNAP3_ENST00000358144
CNTNAP4	CNTNAP4	CNTNAP4
CNTNAP4_ENST00000307431	CNTNAP4_ENST00000307431	CNTNAP4_ENST00000307431
CNTNAP4_ENST00000478060	CNTNAP4_ENST00000478060	CNTNAP4_ENST00000478060
CNTNAP5	CNTNAP5	CNTNAP5
CNTRL_ENST00000373851	CNTRL_ENST00000373851	CNTRL_ENST00000373851
COASY	COASY	COASY
COBL
COBL_ENST00000395542
COBRA1
COCH	COCH	COCH
COG1	COG1	COG1
COG2	COG2	COG2
COG3	COG3	COG3
COG4	COG4	COG4
COG5	COG5	COG5
COG6	COG6	COG6
COG6_ENST00000416691	COG6_ENST00000416691	COG6_ENST00000416691
COG7	COG7	COG7
COL10A1	COL10A1	COL10A1
COL11A2	COL11A2	COL11A2
COL12A1	COL12A1	COL12A1
COL13A1	COL13A1	COL13A1
COL13A1_ENST00000356340	COL13A1_ENST00000356340	COL13A1_ENST00000356340
COL13A1_ENST00000398972	COL13A1_ENST00000398972	COL13A1_ENST00000398972
COL13A1_ENST00000398978	COL13A1_ENST00000398978	COL13A1_ENST00000398978
COL14A1	COL14A1	COL14A1
COL15A1	COL15A1	COL15A1
COL16A1	COL16A1	COL16A1
COL16A1_ENST00000271069	COL16A1_ENST00000271069	COL16A1_ENST00000271069
COL17A1	COL17A1	COL17A1
COL1A1	COL1A1	COL1A1
COL1A2	COL1A2	COL1A2
COL21A1	COL21A1	COL21A1
COL22A1	COL22A1	COL22A1
COL24A1	COL24A1	COL24A1
COL25A1	COL25A1	COL25A1
COL25A1_ENST00000399126	COL25A1_ENST00000399126	COL25A1_ENST00000399126
COL27A1	COL27A1	COL27A1
COL2A1	COL2A1	COL2A1
COL2A1_ENST00000380518	COL2A1_ENST00000380518	COL2A1_ENST00000380518
COL3A1	COL3A1	COL3A1
COL3A1_ENST00000317840	COL3A1_ENST00000317840	COL3A1_ENST00000317840
COL4A1	COL4A1	COL4A1
COL4A1_ENST00000375815	COL4A1_ENST00000375815	COL4A1_ENST00000375815
COL4A2	COL4A2	COL4A2
COL4A3	COL4A3	COL4A3
COL4A3_ENST00000328380	COL4A3_ENST00000328380	COL4A3_ENST00000328380
COL4A3BP	COL4A3BP	COL4A3BP
COL4A3BP_ENST00000380494	COL4A3BP_ENST00000380494	COL4A3BP_ENST00000380494
COL4A4	COL4A4	COL4A4
COL4A5	COL4A5	COL4A5
COL4A5_ENST00000328300	COL4A5_ENST00000328300	COL4A5_ENST00000328300
COL4A6	COL4A6	COL4A6
COL4A6_ENST00000394872	COL4A6_ENST00000394872	COL4A6_ENST00000394872
COL5A1	COL5A1	COL5A1
COL5A3	COL5A3	COL5A3
COL6A1	COL6A1	COL6A1
COL6A2	COL6A2	COL6A2
COL6A2_ENST00000310645	COL6A2_ENST00000310645	COL6A2_ENST00000310645
COL6A2_ENST00000357838	COL6A2_ENST00000357838	COL6A2_ENST00000357838
COL6A3	COL6A3	COL6A3
COL6A5	COL6A5	COL6A5
COL6A6	COL6A6	COL6A6
COL6A6_ENST00000358511	COL6A6_ENST00000358511	COL6A6_ENST00000358511
COL7A1	COL7A1	COL7A1
COL8A1	COL8A1	COL8A1
COL8A2	COL8A2	COL8A2
COL9A1	COL9A1	COL9A1
COL9A1_ENST00000320755	COL9A1_ENST00000320755	COL9A1_ENST00000320755
COL9A1_ENST00000370499	COL9A1_ENST00000370499	COL9A1_ENST00000370499
COL9A2	COL9A2	COL9A2
COL9A3	COL9A3	COL9A3
COLEC10
COLEC12	COLEC12	COLEC12
COMP	COMP	COMP
COPA	COPA	COPA
COPA_ENST00000368069	COPA_ENST00000368069	COPA_ENST00000368069
COPB1	COPB1	COPB1
COPG	COPG	COPG
CORIN	CORIN	CORIN
CORO1A	CORO1A	CORO1A
CORO1B	CORO1B	CORO1B
CORO1C	CORO1C	CORO1C
CORO2A	CORO2A	CORO2A
CORO2B	CORO2B	CORO2B
CORO6	CORO6	CORO6
CORO7	CORO7	CORO7
COX10	COX10	COX10
CP	CP	CP
CPA2	CPA2	CPA2
CPA3	CPA3	CPA3
CPA4	CPA4	CPA4
CPA6
CPAMD8	CPAMD8	CPAMD8
CPB1	CPB1	CPB1
CPD	CPD	CPD
CPE	CPE	CPE
CPEB3	CPEB3	CPEB3
CPEB3_ENST00000394210	CPEB3_ENST00000394210	CPEB3_ENST00000394210
CPEB4	CPEB4	CPEB4
CPED1
CPN1	CPN1	CPN1
CPNE3	CPNE3	CPNE3
CPNE4	CPNE4	CPNE4
CPNE4_ENST00000512332	CPNE4_ENST00000512332	CPNE4_ENST00000512332
CPNE6	CPNE6	CPNE6
CPNE6_ENST00000537691	CPNE6_ENST00000537691	CPNE6_ENST00000537691
CPNE8	CPNE8	CPNE8
CPNE9	CPNE9	CPNE9
CPS1	CPS1	CPS1
CPS1_ENST00000430249	CPS1_ENST00000430249	CPS1_ENST00000430249
CPSF2	CPSF2	CPSF2
CPSF7
CPT1A	CPT1A	CPT1A
CPT1A_ENST00000376618	CPT1A_ENST00000376618	CPT1A_ENST00000376618
CPT1B	CPT1B	CPT1B
CPT1C	CPT1C	CPT1C
CPVL	CPVL	CPVL
CPXM1	CPXM1	CPXM1
CPXM2	CPXM2	CPXM2
CPZ	CPZ	CPZ
CR1_ENST00000367049
CR1L	CR1L	CR1L
CR1L_ENST00000508064	CR1L_ENST00000508064	CR1L_ENST00000508064
CRAMP1L	CRAMP1L	CRAMP1L
CRAMP1L_ENST00000436138	CRAMP1L_ENST00000436138	CRAMP1L_ENST00000436138
CRAT	CRAT	CRAT
CRB1	CRB1	CRB1
CRB1_ENST00000535699	CRB1_ENST00000535699	CRB1_ENST00000535699
CRB2	CRB2	CRB2
CRB2_ENST00000359999	CRB2_ENST00000359999	CRB2_ENST00000359999
CREB3L1	CREB3L1	CREB3L1
CREB3L2_ENST00000456390	CREB3L2_ENST00000456390	CREB3L2_ENST00000456390
CREB3L3	CREB3L3	CREB3L3
CREB5	CREB5	CREB5
CREB5_ENST00000396298	CREB5_ENST00000396298	CREB5_ENST00000396298
CRHBP	CRHBP	CRHBP
CRHR1	CRHR1	CRHR1
CRIM1	CRIM1	CRIM1
CRIPAK	CRIPAK	CRIPAK
CRISP3	CRISP3	CRISP3
CRISP3_ENST00000433368	CRISP3_ENST00000433368	CRISP3_ENST00000433368
CRMP1_ENST00000397890	CRMP1_ENST00000397890	CRMP1_ENST00000397890
CRNKL1	CRNKL1	CRNKL1
CRNN	CRNN	CRNN
CROCC	CROCC	CROCC
CRSP3	CRSP3	CRSP3
CRTAM	CRTAM	CRTAM
CRTC2	CRTC2	CRTC2
CRTC3
CRX	CRX	CRX
CRY1
CRY2	CRY2	CRY2
CRY2_ENST00000443527	CRY2_ENST00000443527	CRY2_ENST00000443527
CRYBB1	CRYBB1	CRYBB1
CTAGE1	CTAGE1	CTAGE1
CTAGE1_ENST00000391403	CTAGE1_ENST00000391403	CTAGE1_ENST00000391403
CTAGE5	CTAGE5	CTAGE5
CTAGE5_ENST00000341502	CTAGE5_ENST00000341502	CTAGE5_ENST00000341502
CTAGE5_ENST00000341749	CTAGE5_ENST00000341749	CTAGE5_ENST00000341749
CTBP1	CTBP1	CTBP1
CTBP2	CTBP2	CTBP2
CTC1	CTC1	CTC1
CTCFL	CTCFL	CTCFL
CTCFL_ENST00000423479	CTCFL_ENST00000423479	CTCFL_ENST00000423479
CTCFL_ENST00000426658	CTCFL_ENST00000426658	CTCFL_ENST00000426658
CTIF	CTIF	CTIF
CTIF_ENST00000420275	CTIF_ENST00000420275	CTIF_ENST00000420275
CTNNA1	CTNNA1	CTNNA1
CTNNA2_ENST00000361291	CTNNA2_ENST00000361291	CTNNA2_ENST00000361291
CTNNA2_ENST00000466387	CTNNA2_ENST00000466387	CTNNA2_ENST00000466387
CTNNA3	CTNNA3	CTNNA3
CTNNA3_ENST00000433211	CTNNA3_ENST00000433211	CTNNA3_ENST00000433211
CTNNA3_ENST00000545309	CTNNA3_ENST00000545309	CTNNA3_ENST00000545309
CTPS2	CTPS2	CTPS2
CTSD	CTSD	CTSD
CTSE	CTSE	CTSE
CTTN_ENST00000376561	CTTN_ENST00000376561	CTTN_ENST00000376561
CTTNBP2	CTTNBP2	CTTNBP2
CUBN	CUBN	CUBN
CUL5	CUL5	CUL5
CUL7	CUL7	CUL7
CUL7_ENST00000535468	CUL7_ENST00000535468	CUL7_ENST00000535468
CUL9	CUL9	CUL9
CUX1_ENST00000292538	CUX1_ENST00000292538	CUX1_ENST00000292538
CUX2	CUX2	CUX2
CUZD1	CUZD1	CUZD1
CWC22	CWC22	CWC22
CWH43	CWH43	CWH43
CXCR4	CXCR4	CXCR4
CXCR4_ENST00000241393	CXCR4_ENST00000241393	CXCR4_ENST00000241393
CXorf22	CXorf22	CXorf22
CXorf23_ENST00000379687	CXorf23_ENST00000379687	CXorf23_ENST00000379687
CXorf36_ENST00000398000	CXorf36_ENST00000398000	CXorf36_ENST00000398000
CXorf57	CXorf57	CXorf57
CXorf59	CXorf59	CXorf59
CXorf66	CXorf66	CXorf66
CXorf67	CXorf67	CXorf67
CXorf67_ENST00000342995	CXorf67_ENST00000342995	CXorf67_ENST00000342995
CYBB
CYLC2	CYLC2	CYLC2
CYP11A1	CYP11A1	CYP11A1
CYP11B1
CYP11B2	CYP11B2	CYP11B2
CYP17A1	CYP17A1	CYP17A1
CYP19A1	CYP19A1	CYP19A1
CYP1A1	CYP1A1	CYP1A1
CYP1A2	CYP1A2	CYP1A2
CYP24A1	CYP24A1	CYP24A1
CYP26A1	CYP26A1	CYP26A1
CYP26A1_ENST00000224356	CYP26A1_ENST00000224356	CYP26A1_ENST00000224356
CYP26B1	CYP26B1	CYP26B1
CYP26C1	CYP26C1	CYP26C1
CYP27C1	CYP27C1	CYP27C1
CYP2A13	CYP2A13	CYP2A13
CYP2A6
CYP2A7_ENST00000291764	CYP2A7_ENST00000291764	CYP2A7_ENST00000291764
CYP2B6	CYP2B6	CYP2B6
CYP2C18	CYP2C18	CYP2C18
CYP2C19	CYP2C19	CYP2C19
CYP2C8	CYP2C8	CYP2C8
CYP2C8_ENST00000535898	CYP2C8_ENST00000535898	CYP2C8_ENST00000535898
CYP2C8_ENST00000539050	CYP2C8_ENST00000539050	CYP2C8_ENST00000539050
CYP2C9	CYP2C9	CYP2C9
CYP2D6_ENST00000360608	CYP2D6_ENST00000360608	CYP2D6_ENST00000360608
CYP2E1	CYP2E1	CYP2E1
CYP2S1	CYP2S1	CYP2S1
CYP3A4	CYP3A4	CYP3A4
CYP3A5	CYP3A5	CYP3A5
CYP3A5_ENST00000343703	CYP3A5_ENST00000343703	CYP3A5_ENST00000343703
CYP3A7
CYP46A1	CYP46A1	CYP46A1
CYP4A11	CYP4A11	CYP4A11
CYP4A22	CYP4A22	CYP4A22
CYP4F12	CYP4F12	CYP4F12
CYP4F22	CYP4F22	CYP4F22
CYP4F3	CYP4F3	CYP4F3
CYP4F3_ENST00000585846	CYP4F3_ENST00000585846	CYP4F3_ENST00000585846
CYP4X1	CYP4X1	CYP4X1
CYP4Z1	CYP4Z1	CYP4Z1
CYP8B1	CYP8B1	CYP8B1
CYSLTR1	CYSLTR1	CYSLTR1
CYTH3	CYTH3	CYTH3
CYTH4	CYTH4	CYTH4
CYTIP	CYTIP	CYTIP
CSAD	CSAD	CSAD
CSAD_ENST00000267085	CSAD_ENST00000267085	CSAD_ENST00000267085
CSE1L	CSE1L	CSE1L
CSF1
CSF1_ENST00000329608	CSF1_ENST00000329608	CSF1_ENST00000329608
CSF1R
CSF2RA	CSF2RA	CSF2RA
CSF2RA_ENST00000355432	CSF2RA_ENST00000355432	CSF2RA_ENST00000355432
CSF2RA_ENST00000381509	CSF2RA_ENST00000381509	CSF2RA_ENST00000381509
CSF2RB	CSF2RB	CSF2RB
CSGALNACT1	CSGALNACT1	CSGALNACT1
CSGALNACT2	CSGALNACT2	CSGALNACT2
CSK_ENST00000220003	CSK_ENST00000220003	CSK_ENST00000220003
CSMD1_ENST00000318252	CSMD1_ENST00000318252	CSMD1_ENST00000318252
CSMD1_ENST00000537824	CSMD1_ENST00000537824	CSMD1_ENST00000537824
CSMD1_ENST00000539096	CSMD1_ENST00000539096	CSMD1_ENST00000539096
CSMD2	CSMD2	CSMD2
CSMD2_ENST00000338325	CSMD2_ENST00000338325	CSMD2_ENST00000338325
CSMD2_ENST00000373380	CSMD2_ENST00000373380	CSMD2_ENST00000373380
CSMD2_ENST00000373381	CSMD2_ENST00000373381	CSMD2_ENST00000373381
CSMD2_ENST00000373388	CSMD2_ENST00000373388	CSMD2_ENST00000373388
CSMD3	CSMD3	CSMD3
CSMD3_ENST00000343508	CSMD3_ENST00000343508	CSMD3_ENST00000343508
CSNK1A1L	CSNK1A1L	CSNK1A1L
CSNK1G2	CSNK1G2	CSNK1G2
CSPG4	CSPG4	CSPG4
CSPG5	CSPG5	CSPG5
CSPG5_ENST00000383738	CSPG5_ENST00000383738	CSPG5_ENST00000383738
CSRNP1	CSRNP1	CSRNP1
CSRNP3	CSRNP3	CSRNP3
CSRP2BP	CSRP2BP	CSRP2BP
CSTF1
CSTF2	CSTF2	CSTF2
CSTF2_ENST00000415585	CSTF2_ENST00000415585	CSTF2_ENST00000415585
CSTF2T	CSTF2T	CSTF2T
D2HGDH	D2HGDH	D2HGDH
DAAM1	DAAM1	DAAM1
DAAM2	DAAM2	DAAM2
DAAM2_ENST00000398904	DAAM2_ENST00000398904	DAAM2_ENST00000398904
DAB1	DAB1	DAB1
DAB1_ENST00000371231	DAB1_ENST00000371231	DAB1_ENST00000371231
DAB2	DAB2	DAB2
DAB2IP	DAB2IP	DAB2IP
DAB2IP_ENST00000259371	DAB2IP_ENST00000259371	DAB2IP_ENST00000259371
DACH2	DACH2	DACH2
DACH2_ENST00000373125	DACH2_ENST00000373125	DACH2_ENST00000373125
DACH2_ENST00000373131	DACH2_ENST00000373131	DACH2_ENST00000373131
DACT1	DACT1	DACT1
DACT2_ENST00000366795	DACT2_ENST00000366795	DACT2_ENST00000366795
DAG1	DAG1	DAG1
DAK	DAK	DAK
DAPK1	DAPK1	DAPK1
DAPK1_ENST00000408954	DAPK1_ENST00000408954	DAPK1_ENST00000408954
DAPK1_ENST00000469640	DAPK1_ENST00000469640	DAPK1_ENST00000469640
DARC_ENST00000368121	DARC_ENST00000368121	DARC_ENST00000368121
DBC1	DBC1	DBC1
DBC1_ENST00000373964	DBC1_ENST00000373964	DBC1_ENST00000373964
DBF4	DBF4	DBF4
DBF4B_ENST00000315005	DBF4B_ENST00000315005	DBF4B_ENST00000315005
DBH	DBH	DBH
DBN1	DBN1	DBN1
DBN1_ENST00000292385	DBN1_ENST00000292385	DBN1_ENST00000292385
DBX2	DBX2	DBX2
DCAF12	DCAF12	DCAF12
DCAF12L2	DCAF12L2	DCAF12L2
DCAF13	DCAF13	DCAF13
DCAF4	DCAF4	DCAF4
DCAF4L1	DCAF4L1	DCAF4L1
DCAF4L2	DCAF4L2	DCAF4L2
DCAF5	DCAF5	DCAF5
DCAF6	DCAF6	DCAF6
DCAF6_ENST00000367840	DCAF6_ENST00000367840	DCAF6_ENST00000367840
DCAF8L1	DCAF8L1	DCAF8L1
DCAF8L2	DCAF8L2	DCAF8L2
DCAF8L2_ENST00000451261	DCAF8L2_ENST00000451261	DCAF8L2_ENST00000451261
DCBLD1	DCBLD1	DCBLD1
DCBLD2	DCBLD2	DCBLD2
DCBLD2_ENST00000326857	DCBLD2_ENST00000326857	DCBLD2_ENST00000326857
DCC	DCC	DCC
DCC_ENST00000412726	DCC_ENST00000412726	DCC_ENST00000412726
DCDC1	DCDC1	DCDC1
[truncated: 7,659 more rows]

## Sheet: PG_SOr3-PG_SSIr3
PG_SSIr3_1SD	PG_SOr3_1SD	in both lists			Number of transcripts	%
JUN	JUN	JUN		PG_SSIr3_1SD	9561	94.7913
A1BG	A1BG	A1BG		PG_SOr3_1SD	9403	96.3841
A1CF	A1CF	A1CF		in both lists	9063
A1CF_ENST00000282641	A1CF_ENST00000282641	A1CF_ENST00000282641
A1CF_ENST00000373995	A1CF_ENST00000373995	A1CF_ENST00000373995
A2M	A2M	A2M
A2ML1	A2ML1	A2ML1
AADAC
AADACL3_ENST00000359318	AADACL3_ENST00000359318	AADACL3_ENST00000359318
AAK1	AAK1	AAK1
AAK1_ENST00000409085	AAK1_ENST00000409085	AAK1_ENST00000409085
AARS	AARS	AARS
AARS2	AARS2	AARS2
AASS	AASS	AASS
AATK	AATK	AATK
AATK_ENST00000326724	AATK_ENST00000326724	AATK_ENST00000326724
ABCA1	ABCA1	ABCA1
ABCA10	ABCA10	ABCA10
ABCA12	ABCA12	ABCA12
ABCA12_ENST00000389661	ABCA12_ENST00000389661	ABCA12_ENST00000389661
ABCA13	ABCA13	ABCA13
ABCA13_ENST00000435803	ABCA13_ENST00000435803	ABCA13_ENST00000435803
ABCA3	ABCA3	ABCA3
ABCA4	ABCA4	ABCA4
ABCA4_ENST00000535735	ABCA4_ENST00000535735	ABCA4_ENST00000535735
ABCA7	ABCA7	ABCA7
ABCA8	ABCA8	ABCA8
ABCA8_ENST00000430352	ABCA8_ENST00000430352	ABCA8_ENST00000430352
ABCA9	ABCA9	ABCA9
ABCB1	ABCB1	ABCB1
ABCB10	ABCB10	ABCB10
ABCB11	ABCB11	ABCB11
ABCB11_ENST00000263817	ABCB11_ENST00000263817	ABCB11_ENST00000263817
ABCB4	ABCB4	ABCB4
ABCB4_ENST00000265723	ABCB4_ENST00000265723	ABCB4_ENST00000265723
ABCB5_ENST00000404938	ABCB5_ENST00000404938	ABCB5_ENST00000404938
ABCB6
ABCB6_ENST00000265316	ABCB6_ENST00000265316	ABCB6_ENST00000265316
ABCB7	ABCB7	ABCB7
ABCC11	ABCC11	ABCC11
ABCC12	ABCC12	ABCC12
ABCC2	ABCC2	ABCC2
ABCC3	ABCC3	ABCC3
ABCC4	ABCC4	ABCC4
ABCC4_ENST00000376887	ABCC4_ENST00000376887	ABCC4_ENST00000376887
ABCC5
ABCC9	ABCC9	ABCC9
ABCC9_ENST00000261201	ABCC9_ENST00000261201	ABCC9_ENST00000261201
ABCD1	ABCD1	ABCD1
ABCD4	ABCD4	ABCD4
ABCF2
ABCF2_ENST00000222388
ABCF3	ABCF3	ABCF3
ABCG1	ABCG1	ABCG1
ABCG1_ENST00000398457	ABCG1_ENST00000398457	ABCG1_ENST00000398457
ABCG2	ABCG2	ABCG2
ABCG2_ENST00000237612	ABCG2_ENST00000237612	ABCG2_ENST00000237612
ABCG4	ABCG4	ABCG4
ABHD16A	ABHD16A	ABHD16A
ABHD2
ABI3BP	ABI3BP	ABI3BP
ABI3BP_ENST00000383691	ABI3BP_ENST00000383691	ABI3BP_ENST00000383691
ABI3BP_ENST00000471714	ABI3BP_ENST00000471714	ABI3BP_ENST00000471714
ABL1	ABL1	ABL1
ABL1_ENST00000318560	ABL1_ENST00000318560	ABL1_ENST00000318560
ABL1_ENST00000372348	ABL1_ENST00000372348	ABL1_ENST00000372348
ABL2_ENST00000502732	ABL2_ENST00000502732	ABL2_ENST00000502732
ABLIM1	ABLIM1	ABLIM1
ABLIM1_ENST00000277895	ABLIM1_ENST00000277895	ABLIM1_ENST00000277895
ABLIM1_ENST00000336585	ABLIM1_ENST00000336585	ABLIM1_ENST00000336585
ABLIM2	ABLIM2	ABLIM2
ABLIM2_ENST00000296372	ABLIM2_ENST00000296372	ABLIM2_ENST00000296372
ABLIM2_ENST00000361737	ABLIM2_ENST00000361737	ABLIM2_ENST00000361737
ABLIM3	ABLIM3	ABLIM3
ABLIM3_ENST00000504238	ABLIM3_ENST00000504238	ABLIM3_ENST00000504238
ABP1	ABP1	ABP1
ABP1_ENST00000416793	ABP1_ENST00000416793	ABP1_ENST00000416793
ABR	ABR	ABR
ABR_ENST00000291107	ABR_ENST00000291107	ABR_ENST00000291107
ABRA	ABRA	ABRA
ABTB1	ABTB1	ABTB1
ABTB2	ABTB2	ABTB2
ABTB2_ENST00000435224	ABTB2_ENST00000435224	ABTB2_ENST00000435224
AC013469_8-2	AC013469_8-2	AC013469_8-2
AC022601.1	AC022601.1	AC022601.1
AC022601.1_ENST00000554864	AC022601.1_ENST00000554864	AC022601.1_ENST00000554864
AC099524.1	AC099524.1	AC099524.1
ACACB	ACACB	ACACB
ACACB_ENST00000543201	ACACB_ENST00000543201	ACACB_ENST00000543201
ACAD10	ACAD10	ACAD10
ACAD10_ENST00000455480	ACAD10_ENST00000455480	ACAD10_ENST00000455480
ACAD11	ACAD11	ACAD11
ACAD9	ACAD9	ACAD9
ACADL
ACADS	ACADS	ACADS
ACAN	ACAN	ACAN
ACAP1	ACAP1	ACAP1
ACAP3	ACAP3	ACAP3
ACAP3_ENST00000354700	ACAP3_ENST00000354700	ACAP3_ENST00000354700
ACBD5	ACBD5	ACBD5
ACBD5_ENST00000375888	ACBD5_ENST00000375888	ACBD5_ENST00000375888
ACBD5_ENST00000396271	ACBD5_ENST00000396271	ACBD5_ENST00000396271
ACCN2	ACCN2	ACCN2
ACCN3	ACCN3	ACCN3
ACCN4	ACCN4	ACCN4
ACD	ACD	ACD
ACE	ACE	ACE
ACE_ENST00000290863	ACE_ENST00000290863	ACE_ENST00000290863
ACE_ENST00000428043	ACE_ENST00000428043	ACE_ENST00000428043
ACE_ENST00000490216	ACE_ENST00000490216	ACE_ENST00000490216
ACE2	ACE2	ACE2
ACHE	ACHE	ACHE
ACHE_ENST00000412389	ACHE_ENST00000412389	ACHE_ENST00000412389
ACLY	ACLY	ACLY
ACMSD	ACMSD	ACMSD
ACO1	ACO1	ACO1
ACO1_ENST00000379923	ACO1_ENST00000379923	ACO1_ENST00000379923
ACO2	ACO2	ACO2
ACOT11	ACOT11	ACOT11
ACOT11_ENST00000371316	ACOT11_ENST00000371316	ACOT11_ENST00000371316
ACOX1	ACOX1	ACOX1
ACOX1_ENST00000301608	ACOX1_ENST00000301608	ACOX1_ENST00000301608
ACOX2	ACOX2	ACOX2
ACOXL	ACOXL	ACOXL
ACOXL_ENST00000439055	ACOXL_ENST00000439055	ACOXL_ENST00000439055
ACPL2
ACPP	ACPP	ACPP
ACPP_ENST00000351273	ACPP_ENST00000351273	ACPP_ENST00000351273
ACPT	ACPT	ACPT
ACRC	ACRC	ACRC
ACTB	ACTB	ACTB
ACTBL2	ACTBL2	ACTBL2
ACTC1	ACTC1	ACTC1
ACTG2	ACTG2	ACTG2
ACTL8	ACTL8	ACTL8
ACTN1	ACTN1	ACTN1
ACTN1_ENST00000394419	ACTN1_ENST00000394419	ACTN1_ENST00000394419
ACTN2	ACTN2	ACTN2
ACTN2_ENST00000542672	ACTN2_ENST00000542672	ACTN2_ENST00000542672
ACTN4	ACTN4	ACTN4
ACTR5	ACTR5	ACTR5
ACTR8	ACTR8	ACTR8
ACTRT1	ACTRT1	ACTRT1
ACVR1	ACVR1	ACVR1
ACVR1C	ACVR1C	ACVR1C
ACVR2B	ACVR2B	ACVR2B
ACVR2B_ENST00000352511	ACVR2B_ENST00000352511	ACVR2B_ENST00000352511
ACVRL1	ACVRL1	ACVRL1
ACVRL1_ENST00000550683	ACVRL1_ENST00000550683	ACVRL1_ENST00000550683
ACSBG1	ACSBG1	ACSBG1
ACSBG2	ACSBG2	ACSBG2
ACCS	ACCS	ACCS
ACCSL	ACCSL	ACCSL
ACSF3	ACSF3	ACSF3
ACSL1	ACSL1	ACSL1
ACSL4
ACSL6	ACSL6	ACSL6
ACSL6_ENST00000379249	ACSL6_ENST00000379249	ACSL6_ENST00000379249
ACSL6_ENST00000379264	ACSL6_ENST00000379264	ACSL6_ENST00000379264
ACSL6_ENST00000379272	ACSL6_ENST00000379272	ACSL6_ENST00000379272
ACSM2A	ACSM2A	ACSM2A
ACSM2B	ACSM2B	ACSM2B
ACSM3	ACSM3	ACSM3
ACSM4	ACSM4	ACSM4
ACSM4_ENST00000399422	ACSM4_ENST00000399422	ACSM4_ENST00000399422
ACSM5	ACSM5	ACSM5
ACSS1	ACSS1	ACSS1
ACSS1_ENST00000537502	ACSS1_ENST00000537502	ACSS1_ENST00000537502
ACSS1_ENST00000542618	ACSS1_ENST00000542618	ACSS1_ENST00000542618
ACSS2	ACSS2	ACSS2
ACSS2_ENST00000253382	ACSS2_ENST00000253382	ACSS2_ENST00000253382
ACSS3	ACSS3	ACSS3
ADAD1	ADAD1	ADAD1
ADAD2	ADAD2	ADAD2
ADAM11	ADAM11	ADAM11
ADAM11_ENST00000200557	ADAM11_ENST00000200557	ADAM11_ENST00000200557
ADAM12	ADAM12	ADAM12
ADAM12_ENST00000368676	ADAM12_ENST00000368676	ADAM12_ENST00000368676
ADAM12_ENST00000368679	ADAM12_ENST00000368679	ADAM12_ENST00000368679
ADAM15	ADAM15	ADAM15
ADAM17	ADAM17	ADAM17
ADAM18	ADAM18	ADAM18
ADAM19	ADAM19	ADAM19
ADAM19_ENST00000257527	ADAM19_ENST00000257527	ADAM19_ENST00000257527
ADAM19_ENST00000394020	ADAM19_ENST00000394020	ADAM19_ENST00000394020
ADAM19_ENST00000430702	ADAM19_ENST00000430702	ADAM19_ENST00000430702
ADAM2	ADAM2	ADAM2
ADAM20	ADAM20	ADAM20
ADAM21	ADAM21	ADAM21
ADAM21_ENST00000267499	ADAM21_ENST00000267499	ADAM21_ENST00000267499
ADAM22	ADAM22	ADAM22
ADAM22_ENST00000265727	ADAM22_ENST00000265727	ADAM22_ENST00000265727
ADAM22_ENST00000315984	ADAM22_ENST00000315984	ADAM22_ENST00000315984
ADAM23	ADAM23	ADAM23
ADAM23_ENST00000374415	ADAM23_ENST00000374415	ADAM23_ENST00000374415
ADAM23_ENST00000374416	ADAM23_ENST00000374416	ADAM23_ENST00000374416
ADAM28	ADAM28	ADAM28
ADAM29	ADAM29	ADAM29
ADAM30	ADAM30	ADAM30
ADAM32	ADAM32	ADAM32
ADAM33	ADAM33	ADAM33
ADAM7	ADAM7	ADAM7
ADAM9	ADAM9	ADAM9
ADAMTS1	ADAMTS1	ADAMTS1
ADAMTS10	ADAMTS10	ADAMTS10
ADAMTS12	ADAMTS12	ADAMTS12
ADAMTS13	ADAMTS13	ADAMTS13
ADAMTS14	ADAMTS14	ADAMTS14
ADAMTS14_ENST00000373208	ADAMTS14_ENST00000373208	ADAMTS14_ENST00000373208
ADAMTS15	ADAMTS15	ADAMTS15
ADAMTS16	ADAMTS16	ADAMTS16
ADAMTS16_ENST00000274181	ADAMTS16_ENST00000274181	ADAMTS16_ENST00000274181
ADAMTS17	ADAMTS17	ADAMTS17
ADAMTS18	ADAMTS18	ADAMTS18
ADAMTS19	ADAMTS19	ADAMTS19
ADAMTS19_ENST00000274487	ADAMTS19_ENST00000274487	ADAMTS19_ENST00000274487
ADAMTS2	ADAMTS2	ADAMTS2
ADAMTS2_ENST00000274609	ADAMTS2_ENST00000274609	ADAMTS2_ENST00000274609
ADAMTS20	ADAMTS20	ADAMTS20
ADAMTS20_ENST00000389420	ADAMTS20_ENST00000389420	ADAMTS20_ENST00000389420
ADAMTS20_ENST00000553158	ADAMTS20_ENST00000553158	ADAMTS20_ENST00000553158
ADAMTS4	ADAMTS4	ADAMTS4
ADAMTS5	ADAMTS5	ADAMTS5
ADAMTS6_ENST00000381055	ADAMTS6_ENST00000381055	ADAMTS6_ENST00000381055
ADAMTS8	ADAMTS8	ADAMTS8
ADAMTS8_ENST00000257359
ADAMTS8_ENST00000414575	ADAMTS8_ENST00000414575	ADAMTS8_ENST00000414575
ADAMTS9	ADAMTS9	ADAMTS9
ADAMTSL1	ADAMTSL1	ADAMTSL1
ADAMTSL1_ENST00000380548	ADAMTSL1_ENST00000380548	ADAMTSL1_ENST00000380548
ADAMTSL1_ENST00000380566	ADAMTSL1_ENST00000380566	ADAMTSL1_ENST00000380566
ADAMTSL2	ADAMTSL2	ADAMTSL2
ADAMTSL2_ENST00000393061	ADAMTSL2_ENST00000393061	ADAMTSL2_ENST00000393061
ADAMTSL3	ADAMTSL3	ADAMTSL3
ADAMTSL3_ENST00000567476
ADAMTSL4_ENST00000369039	ADAMTSL4_ENST00000369039	ADAMTSL4_ENST00000369039
ADAMTSL4_ENST00000369041	ADAMTSL4_ENST00000369041	ADAMTSL4_ENST00000369041
ADAR	ADAR	ADAR
ADAR_ENST00000292205	ADAR_ENST00000292205	ADAR_ENST00000292205
ADARB1	ADARB1	ADARB1
ADARB1_ENST00000389863	ADARB1_ENST00000389863	ADARB1_ENST00000389863
ADAT1
ADCK1	ADCK1	ADCK1
ADCK1_ENST00000238561	ADCK1_ENST00000238561	ADCK1_ENST00000238561
ADCK4	ADCK4	ADCK4
ADCK4_ENST00000324464	ADCK4_ENST00000324464	ADCK4_ENST00000324464
ADCK5
ADCY1	ADCY1	ADCY1
ADCY10	ADCY10	ADCY10
ADCY2	ADCY2	ADCY2
ADCY2_ENST00000537121	ADCY2_ENST00000537121	ADCY2_ENST00000537121
ADCY6
ADCY7	ADCY7	ADCY7
ADCY8	ADCY8	ADCY8
ADCYAP1R1	ADCYAP1R1	ADCYAP1R1
ADD2	ADD2	ADD2
ADD2_ENST00000264436	ADD2_ENST00000264436	ADD2_ENST00000264436
ADD2_ENST00000430656	ADD2_ENST00000430656	ADD2_ENST00000430656
ADH1A	ADH1A	ADH1A
ADH1B	ADH1B	ADH1B
ADH6	ADH6	ADH6
ADH6_ENST00000394899	ADH6_ENST00000394899	ADH6_ENST00000394899
ADH7	ADH7	ADH7
ADH7_ENST00000476959	ADH7_ENST00000476959	ADH7_ENST00000476959
ADNP2	ADNP2	ADNP2
ADORA1	ADORA1	ADORA1
ADORA3_ENST00000369716	ADORA3_ENST00000369716	ADORA3_ENST00000369716
ADRBK1	ADRBK1	ADRBK1
ADRBK2	ADRBK2	ADRBK2
ADSL	ADSL	ADSL
ADSL_ENST00000216194	ADSL_ENST00000216194	ADSL_ENST00000216194
ADSSL1	ADSSL1	ADSSL1
AEBP1	AEBP1	AEBP1
AFAP1L1	AFAP1L1	AFAP1L1
AFAP1L2	AFAP1L2	AFAP1L2
AFAP1L2_ENST00000545353	AFAP1L2_ENST00000545353	AFAP1L2_ENST00000545353
AFF1_ENST00000395146	AFF1_ENST00000395146	AFF1_ENST00000395146
AFF2	AFF2	AFF2
AFF2_ENST00000286437	AFF2_ENST00000286437	AFF2_ENST00000286437
AFF2_ENST00000370460	AFF2_ENST00000370460	AFF2_ENST00000370460
AFF3	AFF3	AFF3
AFF4	AFF4	AFF4
AFG3L2	AFG3L2	AFG3L2
AFM	AFM	AFM
AFTPH	AFTPH	AFTPH
AFTPH_ENST00000238855	AFTPH_ENST00000238855	AFTPH_ENST00000238855
AGAP1	AGAP1	AGAP1
AGAP2	AGAP2	AGAP2
AGAP2_ENST00000547588	AGAP2_ENST00000547588	AGAP2_ENST00000547588
AGAP3	AGAP3	AGAP3
AGAP5_ENST00000374094	AGAP5_ENST00000374094	AGAP5_ENST00000374094
AGBL1	AGBL1	AGBL1
AGBL1_ENST00000389298	AGBL1_ENST00000389298	AGBL1_ENST00000389298
AGBL1_ENST00000441037	AGBL1_ENST00000441037	AGBL1_ENST00000441037
AGBL2	AGBL2	AGBL2
AGBL4
AGC1	AGC1	AGC1
AGFG2	AGFG2	AGFG2
AGMO	AGMO	AGMO
AGPAT4	AGPAT4	AGPAT4
AGPAT6	AGPAT6	AGPAT6
AGPAT9	AGPAT9	AGPAT9
AGPS	AGPS	AGPS
AGRN	AGRN	AGRN
AGTPBP1_ENST00000357081	AGTPBP1_ENST00000357081	AGTPBP1_ENST00000357081
AGTR1	AGTR1	AGTR1
AGTR2	AGTR2	AGTR2
AGXT
AGXT2	AGXT2	AGXT2
AHCY	AHCY	AHCY
AHDC1
AHNAK	AHNAK	AHNAK
AHNAK2_ENST00000333244	AHNAK2_ENST00000333244	AHNAK2_ENST00000333244
AHR	AHR	AHR
AHRR	AHRR	AHRR
AHSG	AHSG	AHSG
AICDA	AICDA	AICDA
AIFM1	AIFM1	AIFM1
AIFM3	AIFM3	AIFM3
AIFM3_ENST00000335375	AIFM3_ENST00000335375	AIFM3_ENST00000335375
AIFM3_ENST00000405089	AIFM3_ENST00000405089	AIFM3_ENST00000405089
AIM1	AIM1	AIM1
AIM1L_ENST00000527815	AIM1L_ENST00000527815	AIM1L_ENST00000527815
AIRE	AIRE	AIRE
AJAP1	AJAP1	AJAP1
AK5	AK5	AK5
AK7	AK7	AK7
AK8	AK8	AK8
AKAP1	AKAP1	AKAP1
AKAP12	AKAP12	AKAP12
AKAP12_ENST00000359755	AKAP12_ENST00000359755	AKAP12_ENST00000359755
AKAP13	AKAP13	AKAP13
AKAP13_ENST00000394518	AKAP13_ENST00000394518	AKAP13_ENST00000394518
AKAP17A	AKAP17A	AKAP17A
AKAP17A_ENST00000381261	AKAP17A_ENST00000381261	AKAP17A_ENST00000381261
AKAP2	AKAP2	AKAP2
AKAP3	AKAP3	AKAP3
AKAP3_ENST00000545990	AKAP3_ENST00000545990	AKAP3_ENST00000545990
AKAP4	AKAP4	AKAP4
AKAP6	AKAP6	AKAP6
AKAP8	AKAP8	AKAP8
AKAP8L	AKAP8L	AKAP8L
AKAP8L_ENST00000397410	AKAP8L_ENST00000397410	AKAP8L_ENST00000397410
AKAP9	AKAP9	AKAP9
AKAP9_ENST00000356239	AKAP9_ENST00000356239	AKAP9_ENST00000356239
AKNA	AKNA	AKNA
AKNAD1	AKNAD1	AKNAD1
AKNAD1_ENST00000369995	AKNAD1_ENST00000369995	AKNAD1_ENST00000369995
AKR1D1	AKR1D1	AKR1D1
AKT2	AKT2	AKT2
AL589988.1	AL589988.1	AL589988.1
ALAS1	ALAS1	ALAS1
ALAS2	ALAS2	ALAS2
ALAS2_ENST00000330807	ALAS2_ENST00000330807	ALAS2_ENST00000330807
ALAS2_ENST00000396198	ALAS2_ENST00000396198	ALAS2_ENST00000396198
ALB	ALB	ALB
ALCAM	ALCAM	ALCAM
ALDH16A1	ALDH16A1	ALDH16A1
ALDH18A1	ALDH18A1	ALDH18A1
ALDH1A1	ALDH1A1	ALDH1A1
ALDH1A2	ALDH1A2	ALDH1A2
ALDH1A3	ALDH1A3	ALDH1A3
ALDH1B1	ALDH1B1	ALDH1B1
ALDH1L1	ALDH1L1	ALDH1L1
ALDH1L2	ALDH1L2	ALDH1L2
ALDH2	ALDH2	ALDH2
ALDH2_ENST00000261733	ALDH2_ENST00000261733	ALDH2_ENST00000261733
ALDH3A1	ALDH3A1	ALDH3A1
ALDH4A1
ALDH4A1_ENST00000375341
ALDH5A1	ALDH5A1	ALDH5A1
ALDH6A1	ALDH6A1	ALDH6A1
ALDH8A1	ALDH8A1	ALDH8A1
ALDOB	ALDOB	ALDOB
ALG1	ALG1	ALG1
ALG10B	ALG10B	ALG10B
ALG13_ENST00000251943	ALG13_ENST00000251943	ALG13_ENST00000251943
ALG13_ENST00000394780	ALG13_ENST00000394780	ALG13_ENST00000394780
ALK_ENST00000431873	ALK_ENST00000431873	ALK_ENST00000431873
ALLC	ALLC	ALLC
ALOX12	ALOX12	ALOX12
ALOX12B	ALOX12B	ALOX12B
ALOX12B_ENST00000319144	ALOX12B_ENST00000319144	ALOX12B_ENST00000319144
ALOX15_ENST00000545513	ALOX15_ENST00000545513	ALOX15_ENST00000545513
ALOX15B	ALOX15B	ALOX15B
ALOX5	ALOX5	ALOX5
ALOXE3	ALOXE3	ALOXE3
ALOXE3_ENST00000318227	ALOXE3_ENST00000318227	ALOXE3_ENST00000318227
ALPK1	ALPK1	ALPK1
ALPK2	ALPK2	ALPK2
ALPK2_ENST00000361673	ALPK2_ENST00000361673	ALPK2_ENST00000361673
ALPK3	ALPK3	ALPK3
ALPK3_ENST00000258888	ALPK3_ENST00000258888	ALPK3_ENST00000258888
ALPP	ALPP	ALPP
ALPPL2	ALPPL2	ALPPL2
ALS2	ALS2	ALS2
ALS2CL	ALS2CL	ALS2CL
ALS2CR11	ALS2CR11	ALS2CR11
ALS2CR11_ENST00000439140	ALS2CR11_ENST00000439140	ALS2CR11_ENST00000439140
ALS2CR11_ENST00000450242	ALS2CR11_ENST00000450242	ALS2CR11_ENST00000450242
ALX1	ALX1	ALX1
AMAC1	AMAC1	AMAC1
AMAC1L2	AMAC1L2	AMAC1L2
AMACR	AMACR	AMACR
AMBN	AMBN	AMBN
AMBRA1
AMBRA1_ENST00000458649
AMDHD1	AMDHD1	AMDHD1
AMFR	AMFR	AMFR
AMHR2	AMHR2	AMHR2
AMIGO2	AMIGO2	AMIGO2
AMOT	AMOT	AMOT
AMOT_ENST00000371958
AMOT_ENST00000371959	AMOT_ENST00000371959	AMOT_ENST00000371959
AMOTL1	AMOTL1	AMOTL1
AMOTL2	AMOTL2	AMOTL2
AMPD1	AMPD1	AMPD1
AMPD1_ENST00000520113	AMPD1_ENST00000520113	AMPD1_ENST00000520113
AMPD2_ENST00000393688	AMPD2_ENST00000393688	AMPD2_ENST00000393688
AMPD2_ENST00000393689	AMPD2_ENST00000393689	AMPD2_ENST00000393689
AMPD3	AMPD3	AMPD3
AMPH	AMPH	AMPH
AMPH_ENST00000428293	AMPH_ENST00000428293	AMPH_ENST00000428293
AMY2B	AMY2B	AMY2B
ANAPC1	ANAPC1	ANAPC1
ANAPC2	ANAPC2	ANAPC2
ANAPC4	ANAPC4	ANAPC4
ANAPC5	ANAPC5	ANAPC5
ANAPC7
ANGEL1	ANGEL1	ANGEL1
ANGPT2	ANGPT2	ANGPT2
ANGPT2_ENST00000325203	ANGPT2_ENST00000325203	ANGPT2_ENST00000325203
ANGPT4	ANGPT4	ANGPT4
ANGPTL1	ANGPTL1	ANGPTL1
ANGPTL4	ANGPTL4	ANGPTL4
ANGPTL5	ANGPTL5	ANGPTL5
ANK1	ANK1	ANK1
ANK1_ENST00000265709	ANK1_ENST00000265709	ANK1_ENST00000265709
ANK2	ANK2	ANK2
ANK2_ENST00000506722	ANK2_ENST00000506722	ANK2_ENST00000506722
ANK3	ANK3	ANK3
ANK3_ENST00000395293	ANK3_ENST00000395293	ANK3_ENST00000395293
ANKFN1	ANKFN1	ANKFN1
ANKFY1	ANKFY1	ANKFY1
ANKFY1_ENST00000570535	ANKFY1_ENST00000570535	ANKFY1_ENST00000570535
ANKHD1	ANKHD1	ANKHD1
ANKHD1_ENST00000261805	ANKHD1_ENST00000261805	ANKHD1_ENST00000261805
ANKHD1-EIF4EBP3	ANKHD1-EIF4EBP3	ANKHD1-EIF4EBP3
ANKIB1	ANKIB1	ANKIB1
ANKK1	ANKK1	ANKK1
ANKLE1	ANKLE1	ANKLE1
ANKLE2	ANKLE2	ANKLE2
ANKLE2_ENST00000337516	ANKLE2_ENST00000337516	ANKLE2_ENST00000337516
ANKRD11	ANKRD11	ANKRD11
ANKRD13B
ANKRD13C	ANKRD13C	ANKRD13C
ANKRD13D	ANKRD13D	ANKRD13D
ANKRD13D_ENST00000511455	ANKRD13D_ENST00000511455	ANKRD13D_ENST00000511455
ANKRD17	ANKRD17	ANKRD17
ANKRD18A	ANKRD18A	ANKRD18A
ANKRD18B	ANKRD18B	ANKRD18B
ANKRD20A4	ANKRD20A4	ANKRD20A4
ANKRD24	ANKRD24	ANKRD24
ANKRD24_ENST00000262970	ANKRD24_ENST00000262970	ANKRD24_ENST00000262970
ANKRD24_ENST00000318934	ANKRD24_ENST00000318934	ANKRD24_ENST00000318934
ANKRD26	ANKRD26	ANKRD26
ANKRD26_ENST00000376070	ANKRD26_ENST00000376070	ANKRD26_ENST00000376070
ANKRD27	ANKRD27	ANKRD27
ANKRD30A	ANKRD30A	ANKRD30A
ANKRD30A_ENST00000602533	ANKRD30A_ENST00000602533	ANKRD30A_ENST00000602533
ANKRD30B	ANKRD30B	ANKRD30B
ANKRD30B_ENST00000358984	ANKRD30B_ENST00000358984	ANKRD30B_ENST00000358984
ANKRD32_ENST00000265140	ANKRD32_ENST00000265140	ANKRD32_ENST00000265140
ANKRD34A	ANKRD34A	ANKRD34A
ANKRD34B	ANKRD34B	ANKRD34B
ANKRD35	ANKRD35	ANKRD35
ANKRD36	ANKRD36	ANKRD36
ANKRD44	ANKRD44	ANKRD44
ANKRD44_ENST00000282272	ANKRD44_ENST00000282272	ANKRD44_ENST00000282272
ANKRD44_ENST00000337207	ANKRD44_ENST00000337207	ANKRD44_ENST00000337207
ANKRD44_ENST00000424317	ANKRD44_ENST00000424317	ANKRD44_ENST00000424317
ANKRD5	ANKRD5	ANKRD5
ANKRD52	ANKRD52	ANKRD52
ANKRD55	ANKRD55	ANKRD55
ANKRD6	ANKRD6	ANKRD6
ANKS1A	ANKS1A	ANKS1A
ANKS1A_ENST00000373990	ANKS1A_ENST00000373990	ANKS1A_ENST00000373990
ANKS1B	ANKS1B	ANKS1B
ANKS1B_ENST00000329257	ANKS1B_ENST00000329257	ANKS1B_ENST00000329257
ANKS1B_ENST00000332712	ANKS1B_ENST00000332712	ANKS1B_ENST00000332712
ANKS1B_ENST00000549493	ANKS1B_ENST00000549493	ANKS1B_ENST00000549493
ANKS6	ANKS6	ANKS6
ANKZF1	ANKZF1	ANKZF1
ANLN	ANLN	ANLN
ANO2	ANO2	ANO2
ANO2_ENST00000327087	ANO2_ENST00000327087	ANO2_ENST00000327087
ANO2_ENST00000356134	ANO2_ENST00000356134	ANO2_ENST00000356134
ANO2_ENST00000546188	ANO2_ENST00000546188	ANO2_ENST00000546188
ANO3	ANO3	ANO3
ANO4	ANO4	ANO4
ANO5	ANO5	ANO5
ANO6_ENST00000425752	ANO6_ENST00000425752	ANO6_ENST00000425752
ANO8	ANO8	ANO8
ANPEP	ANPEP	ANPEP
ANTXR2_ENST00000403729	ANTXR2_ENST00000403729	ANTXR2_ENST00000403729
ANUBL1	ANUBL1	ANUBL1
ANXA13	ANXA13	ANXA13
ANXA6	ANXA6	ANXA6
ANXA6_ENST00000354546	ANXA6_ENST00000354546	ANXA6_ENST00000354546
AOAH	AOAH	AOAH
AOC2	AOC2	AOC2
AOC3	AOC3	AOC3
AOF2	AOF2	AOF2
AOX1	AOX1	AOX1
AP1G1	AP1G1	AP1G1
AP1G1_ENST00000393512	AP1G1_ENST00000393512	AP1G1_ENST00000393512
AP1G1_ENST00000423132	AP1G1_ENST00000423132	AP1G1_ENST00000423132
AP1G1_ENST00000433195	AP1G1_ENST00000433195	AP1G1_ENST00000433195
AP1G2	AP1G2	AP1G2
AP1G2_ENST00000535852	AP1G2_ENST00000535852	AP1G2_ENST00000535852
AP2A1	AP2A1	AP2A1
AP2A1_ENST00000359032	AP2A1_ENST00000359032	AP2A1_ENST00000359032
AP2M1	AP2M1	AP2M1
AP3B2	AP3B2	AP3B2
AP3D1	AP3D1	AP3D1
AP3D1_ENST00000355272	AP3D1_ENST00000355272	AP3D1_ENST00000355272
AP3D1_ENST00000356926	AP3D1_ENST00000356926	AP3D1_ENST00000356926
AP4B1	AP4B1	AP4B1
AP4M1	AP4M1	AP4M1
AP5B1	AP5B1	AP5B1
AP5B1_ENST00000532090	AP5B1_ENST00000532090	AP5B1_ENST00000532090
APBA2	APBA2	APBA2
APBB1	APBB1	APBB1
APBB1_ENST00000389906	APBB1_ENST00000389906	APBB1_ENST00000389906
APBB1IP	APBB1IP	APBB1IP
APBB2	APBB2	APBB2
APBB2_ENST00000295974	APBB2_ENST00000295974	APBB2_ENST00000295974
APBB3	APBB3	APBB3
APC2	APC2	APC2
APCDD1L	APCDD1L	APCDD1L
APCDD1L_ENST00000439429	APCDD1L_ENST00000439429	APCDD1L_ENST00000439429
APEH	APEH	APEH
APEX2	APEX2	APEX2
APLP1	APLP1	APLP1
APLP2	APLP2	APLP2
APOA5	APOA5	APOA5
APOB	APOB	APOB
APOBR	APOBR	APOBR
APOBR_ENST00000564831	APOBR_ENST00000564831	APOBR_ENST00000564831
APOH	APOH	APOH
APOL5	APOL5	APOL5
APP	APP	APP
APPBP2	APPBP2	APPBP2
APPL2	APPL2	APPL2
AQP10	AQP10	AQP10
ARAP1_ENST00000393609	ARAP1_ENST00000393609	ARAP1_ENST00000393609
ARAP2	ARAP2	ARAP2
ARAP3	ARAP3	ARAP3
ARC	ARC	ARC
ARFGEF1	ARFGEF1	ARFGEF1
ARFGEF2	ARFGEF2	ARFGEF2
ARHGAP10	ARHGAP10	ARHGAP10
ARHGAP12_ENST00000344936
ARHGAP15	ARHGAP15	ARHGAP15
ARHGAP17	ARHGAP17	ARHGAP17
ARHGAP17_ENST00000289968	ARHGAP17_ENST00000289968	ARHGAP17_ENST00000289968
ARHGAP20	ARHGAP20	ARHGAP20
ARHGAP20_ENST00000533353	ARHGAP20_ENST00000533353	ARHGAP20_ENST00000533353
ARHGAP21	ARHGAP21	ARHGAP21
ARHGAP21_ENST00000320481	ARHGAP21_ENST00000320481	ARHGAP21_ENST00000320481
ARHGAP21_ENST00000376410	ARHGAP21_ENST00000376410	ARHGAP21_ENST00000376410
ARHGAP22	ARHGAP22	ARHGAP22
ARHGAP22_ENST00000417247	ARHGAP22_ENST00000417247	ARHGAP22_ENST00000417247
ARHGAP22_ENST00000417912	ARHGAP22_ENST00000417912	ARHGAP22_ENST00000417912
ARHGAP24	ARHGAP24	ARHGAP24
ARHGAP25	ARHGAP25	ARHGAP25
ARHGAP25_ENST00000409202	ARHGAP25_ENST00000409202	ARHGAP25_ENST00000409202
ARHGAP25_ENST00000497079	ARHGAP25_ENST00000497079	ARHGAP25_ENST00000497079
ARHGAP26	ARHGAP26	ARHGAP26
ARHGAP27	ARHGAP27	ARHGAP27
ARHGAP27_ENST00000428638	ARHGAP27_ENST00000428638	ARHGAP27_ENST00000428638
ARHGAP28	ARHGAP28	ARHGAP28
ARHGAP28_ENST00000400091	ARHGAP28_ENST00000400091	ARHGAP28_ENST00000400091
ARHGAP30	ARHGAP30	ARHGAP30
ARHGAP31	ARHGAP31	ARHGAP31
ARHGAP32	ARHGAP32	ARHGAP32
ARHGAP32_ENST00000310343	ARHGAP32_ENST00000310343	ARHGAP32_ENST00000310343
ARHGAP33	ARHGAP33	ARHGAP33
ARHGAP33_ENST00000378944	ARHGAP33_ENST00000378944	ARHGAP33_ENST00000378944
ARHGAP36	ARHGAP36	ARHGAP36
ARHGAP36_ENST00000276211	ARHGAP36_ENST00000276211	ARHGAP36_ENST00000276211
ARHGAP4	ARHGAP4	ARHGAP4
ARHGAP4_ENST00000370028	ARHGAP4_ENST00000370028	ARHGAP4_ENST00000370028
ARHGAP40_ENST00000373345	ARHGAP40_ENST00000373345	ARHGAP40_ENST00000373345
ARHGAP42	ARHGAP42	ARHGAP42
ARHGAP44	ARHGAP44	ARHGAP44
ARHGAP5	ARHGAP5	ARHGAP5
ARHGAP6	ARHGAP6	ARHGAP6
ARHGAP6_ENST00000380718	ARHGAP6_ENST00000380718	ARHGAP6_ENST00000380718
ARHGAP6_ENST00000380732	ARHGAP6_ENST00000380732	ARHGAP6_ENST00000380732
ARHGAP6_ENST00000534860
ARHGEF1	ARHGEF1	ARHGEF1
ARHGEF10	ARHGEF10	ARHGEF10
ARHGEF10_ENST00000398560	ARHGEF10_ENST00000398560	ARHGEF10_ENST00000398560
ARHGEF10_ENST00000398564	ARHGEF10_ENST00000398564	ARHGEF10_ENST00000398564
ARHGEF10L	ARHGEF10L	ARHGEF10L
ARHGEF10L_ENST00000361221	ARHGEF10L_ENST00000361221	ARHGEF10L_ENST00000361221
ARHGEF10L_ENST00000375408	ARHGEF10L_ENST00000375408	ARHGEF10L_ENST00000375408
ARHGEF11	ARHGEF11	ARHGEF11
ARHGEF11_ENST00000315174	ARHGEF11_ENST00000315174	ARHGEF11_ENST00000315174
ARHGEF12	ARHGEF12	ARHGEF12
ARHGEF15	ARHGEF15	ARHGEF15
ARHGEF17	ARHGEF17	ARHGEF17
ARHGEF19	ARHGEF19	ARHGEF19
ARHGEF2	ARHGEF2	ARHGEF2
ARHGEF2_ENST00000361247	ARHGEF2_ENST00000361247	ARHGEF2_ENST00000361247
ARHGEF2_ENST00000368315	ARHGEF2_ENST00000368315	ARHGEF2_ENST00000368315
ARHGEF25	ARHGEF25	ARHGEF25
ARHGEF25_ENST00000333972	ARHGEF25_ENST00000333972	ARHGEF25_ENST00000333972
ARHGEF26	ARHGEF26	ARHGEF26
ARHGEF26_ENST00000356448	ARHGEF26_ENST00000356448	ARHGEF26_ENST00000356448
ARHGEF3	ARHGEF3	ARHGEF3
ARHGEF3_ENST00000296315	ARHGEF3_ENST00000296315	ARHGEF3_ENST00000296315
ARHGEF3_ENST00000338458	ARHGEF3_ENST00000338458	ARHGEF3_ENST00000338458
ARHGEF3_ENST00000413728	ARHGEF3_ENST00000413728	ARHGEF3_ENST00000413728
ARHGEF4	ARHGEF4	ARHGEF4
ARHGEF4_ENST00000392953	ARHGEF4_ENST00000392953	ARHGEF4_ENST00000392953
ARHGEF40_ENST00000298694	ARHGEF40_ENST00000298694	ARHGEF40_ENST00000298694
ARHGEF5	ARHGEF5	ARHGEF5
ARHGEF6	ARHGEF6	ARHGEF6
ARHGEF7_ENST00000375736	ARHGEF7_ENST00000375736	ARHGEF7_ENST00000375736
ARHGEF9	ARHGEF9	ARHGEF9
ARHGEF9_ENST00000253401	ARHGEF9_ENST00000253401	ARHGEF9_ENST00000253401
ARHGEF9_ENST00000374878	ARHGEF9_ENST00000374878	ARHGEF9_ENST00000374878
ARID3A	ARID3A	ARID3A
ARID3B	ARID3B	ARID3B
ARID3C	ARID3C	ARID3C
ARID5B	ARID5B	ARID5B
ARIH2
ARMC2	ARMC2	ARMC2
ARMC4	ARMC4	ARMC4
ARMC4_ENST00000434029	ARMC4_ENST00000434029	ARMC4_ENST00000434029
ARMC4_ENST00000545014	ARMC4_ENST00000545014	ARMC4_ENST00000545014
ARMC5	ARMC5	ARMC5
ARMC5_ENST00000457010	ARMC5_ENST00000457010	ARMC5_ENST00000457010
ARMC8_ENST00000481646
ARMC9	ARMC9	ARMC9
ARMCX1	ARMCX1	ARMCX1
ARMCX2	ARMCX2	ARMCX2
ARMCX5	ARMCX5	ARMCX5
ARNT	ARNT	ARNT
ARNT2	ARNT2	ARNT2
ARNTL	ARNTL	ARNTL
ARNTL2
ARRB1	ARRB1	ARRB1
ARRB1_ENST00000393505	ARRB1_ENST00000393505	ARRB1_ENST00000393505
ARSB	ARSB	ARSB
ARSD	ARSD	ARSD
ARSF	ARSF	ARSF
ARSG	ARSG	ARSG
ARSI	ARSI	ARSI
ARSJ	ARSJ	ARSJ
ARVCF	ARVCF	ARVCF
ASAP1	ASAP1	ASAP1
ASAP2	ASAP2	ASAP2
ASAP3	ASAP3	ASAP3
ASAP3_ENST00000437606	ASAP3_ENST00000437606	ASAP3_ENST00000437606
ASB10	ASB10	ASB10
ASB10_ENST00000420175	ASB10_ENST00000420175	ASB10_ENST00000420175
ASB10_ENST00000422024	ASB10_ENST00000422024	ASB10_ENST00000422024
ASB15_ENST00000451558	ASB15_ENST00000451558	ASB15_ENST00000451558
ASB17	ASB17	ASB17
ASB3	ASB3	ASB3
ASB4	ASB4	ASB4
ASL	ASL	ASL
ASNS	ASNS	ASNS
ASNS_ENST00000394309	ASNS_ENST00000394309	ASNS_ENST00000394309
ASPG	ASPG	ASPG
ASPH	ASPH	ASPH
ASPHD1	ASPHD1	ASPHD1
ASPM	ASPM	ASPM
ASPSCR1_ENST00000580534
ASS1	ASS1	ASS1
ASTL	ASTL	ASTL
ASTN1	ASTN1	ASTN1
ASTN1_ENST00000367654	ASTN1_ENST00000367654	ASTN1_ENST00000367654
ASTN2	ASTN2	ASTN2
ASTN2_ENST00000288520	ASTN2_ENST00000288520	ASTN2_ENST00000288520
ASTN2_ENST00000313400	ASTN2_ENST00000313400	ASTN2_ENST00000313400
ASXL3_ENST00000269197	ASXL3_ENST00000269197	ASXL3_ENST00000269197
ASZ1	ASZ1	ASZ1
ATAD3A	ATAD3A	ATAD3A
ATAD3B	ATAD3B	ATAD3B
ATE1	ATE1	ATE1
ATE1_ENST00000224652	ATE1_ENST00000224652	ATE1_ENST00000224652
ATF2	ATF2	ATF2
ATF6B
ATF7	ATF7	ATF7
ATF7_ENST00000328463	ATF7_ENST00000328463	ATF7_ENST00000328463
ATF7IP_ENST00000543189
ATG16L1	ATG16L1	ATG16L1
ATG2A	ATG2A	ATG2A
ATG2B	ATG2B	ATG2B
ATG4D	ATG4D	ATG4D
ATG7	ATG7	ATG7
ATL1	ATL1	ATL1
ATN1	ATN1	ATN1
ATP10B	ATP10B	ATP10B
ATP10D	ATP10D	ATP10D
ATP11C	ATP11C	ATP11C
ATP11C_ENST00000361648	ATP11C_ENST00000361648	ATP11C_ENST00000361648
ATP11C_ENST00000370543	ATP11C_ENST00000370543	ATP11C_ENST00000370543
ATP11C_ENST00000370557	ATP11C_ENST00000370557	ATP11C_ENST00000370557
ATP12A	ATP12A	ATP12A
ATP12A_ENST00000218548	ATP12A_ENST00000218548	ATP12A_ENST00000218548
ATP13A1	ATP13A1	ATP13A1
ATP13A1_ENST00000291503	ATP13A1_ENST00000291503	ATP13A1_ENST00000291503
ATP13A2	ATP13A2	ATP13A2
ATP13A2_ENST00000341676	ATP13A2_ENST00000341676	ATP13A2_ENST00000341676
ATP13A3	ATP13A3	ATP13A3
ATP13A4	ATP13A4	ATP13A4
ATP13A4_ENST00000295548	ATP13A4_ENST00000295548	ATP13A4_ENST00000295548
ATP13A5	ATP13A5	ATP13A5
ATP1A1	ATP1A1	ATP1A1
ATP1A2	ATP1A2	ATP1A2
ATP1A4	ATP1A4	ATP1A4
ATP1B4	ATP1B4	ATP1B4
ATP1B4_ENST00000218008	ATP1B4_ENST00000218008	ATP1B4_ENST00000218008
ATP2A1	ATP2A1	ATP2A1
ATP2A1_ENST00000395503	ATP2A1_ENST00000395503	ATP2A1_ENST00000395503
ATP2A2	ATP2A2	ATP2A2
ATP2A3_ENST00000352011	ATP2A3_ENST00000352011	ATP2A3_ENST00000352011
ATP2B1	ATP2B1	ATP2B1
ATP2B1_ENST00000359142	ATP2B1_ENST00000359142	ATP2B1_ENST00000359142
ATP2B4	ATP2B4	ATP2B4
ATP2B4_ENST00000367218	ATP2B4_ENST00000367218	ATP2B4_ENST00000367218
ATP2C1	ATP2C1	ATP2C1
ATP2C1_ENST00000393221	ATP2C1_ENST00000393221	ATP2C1_ENST00000393221
ATP2C2	ATP2C2	ATP2C2
ATP4A	ATP4A	ATP4A
ATP5A1	ATP5A1	ATP5A1
ATP5B	ATP5B	ATP5B
ATP6AP1	ATP6AP1	ATP6AP1
ATP6V0A1	ATP6V0A1	ATP6V0A1
ATP6V0A1_ENST00000264649	ATP6V0A1_ENST00000264649	ATP6V0A1_ENST00000264649
ATP6V0A2	ATP6V0A2	ATP6V0A2
ATP6V0A4	ATP6V0A4	ATP6V0A4
ATP6V1C2_ENST00000272238
ATP6V1H_ENST00000359530	ATP6V1H_ENST00000359530	ATP6V1H_ENST00000359530
ATP7A	ATP7A	ATP7A
ATP7A_ENST00000341514	ATP7A_ENST00000341514	ATP7A_ENST00000341514
ATP7B	ATP7B	ATP7B
ATP8A1	ATP8A1	ATP8A1
ATP8A1_ENST00000264449	ATP8A1_ENST00000264449	ATP8A1_ENST00000264449
ATP8A2	ATP8A2	ATP8A2
ATP8B1	ATP8B1	ATP8B1
ATP8B2	ATP8B2	ATP8B2
ATP8B2_ENST00000368487	ATP8B2_ENST00000368487	ATP8B2_ENST00000368487
ATP8B3	ATP8B3	ATP8B3
ATP8B3_ENST00000525591	ATP8B3_ENST00000525591	ATP8B3_ENST00000525591
ATP8B4	ATP8B4	ATP8B4
ATP9A	ATP9A	ATP9A
ATP9B	ATP9B	ATP9B
ATRIP
ATRNL1	ATRNL1	ATRNL1
ATXN1	ATXN1	ATXN1
ATXN2	ATXN2	ATXN2
ATXN7	ATXN7	ATXN7
ATXN7_ENST00000398590
ATXN7L1_ENST00000419735	ATXN7L1_ENST00000419735	ATXN7L1_ENST00000419735
ATXN7L2	ATXN7L2	ATXN7L2
AURKB	AURKB	AURKB
AURKB_ENST00000316199	AURKB_ENST00000316199	AURKB_ENST00000316199
AURKC	AURKC	AURKC
AURKC_ENST00000302804	AURKC_ENST00000302804	AURKC_ENST00000302804
AUTS2	AUTS2	AUTS2
AVPR1A
AZGP1	AZGP1	AZGP1
AZI1	AZI1	AZI1
AZI1_ENST00000450824	AZI1_ENST00000450824	AZI1_ENST00000450824
B3GALTL
B3GAT2	B3GAT2	B3GAT2
B3GNT3	B3GNT3	B3GNT3
B3GNT7	B3GNT7	B3GNT7
B3GNTL1	B3GNTL1	B3GNTL1
B4GALNT1	B4GALNT1	B4GALNT1
B4GALNT2	B4GALNT2	B4GALNT2
B4GALNT3	B4GALNT3	B4GALNT3
B4GALNT4
B4GALT5	B4GALT5	B4GALT5
BAAT	BAAT	BAAT
BACE1	BACE1	BACE1
BACE2	BACE2	BACE2
BACH2	BACH2	BACH2
BACH2_ENST00000257749	BACH2_ENST00000257749	BACH2_ENST00000257749
BAG3	BAG3	BAG3
BAG6	BAG6	BAG6
BAG6_ENST00000404765	BAG6_ENST00000404765	BAG6_ENST00000404765
BAHCC1	BAHCC1	BAHCC1
BAHD1	BAHD1	BAHD1
BAI1	BAI1	BAI1
BAI2	BAI2	BAI2
BAI3	BAI3	BAI3
BAI3_ENST00000238918
BAIAP2	BAIAP2	BAIAP2
BAIAP2_ENST00000321300	BAIAP2_ENST00000321300	BAIAP2_ENST00000321300
BAIAP2_ENST00000435091	BAIAP2_ENST00000435091	BAIAP2_ENST00000435091
BAIAP3	BAIAP3	BAIAP3
BAIAP3_ENST00000397488	BAIAP3_ENST00000397488	BAIAP3_ENST00000397488
BANK1	BANK1	BANK1
BANP	BANP	BANP
BANP_ENST00000355163	BANP_ENST00000355163	BANP_ENST00000355163
BANP_ENST00000393207	BANP_ENST00000393207	BANP_ENST00000393207
BARHL1	BARHL1	BARHL1
BAT2D1	BAT2D1	BAT2D1
BAZ1B	BAZ1B	BAZ1B
BAZ2A	BAZ2A	BAZ2A
BAZ2A_ENST00000379441	BAZ2A_ENST00000379441	BAZ2A_ENST00000379441
BAZ2A_ENST00000551812	BAZ2A_ENST00000551812	BAZ2A_ENST00000551812
BBS1	BBS1	BBS1
BBS10	BBS10	BBS10
BBS12	BBS12	BBS12
BBS2	BBS2	BBS2
BBS7	BBS7	BBS7
BBS9	BBS9	BBS9
BBS9_ENST00000242067	BBS9_ENST00000242067	BBS9_ENST00000242067
BBS9_ENST00000354265	BBS9_ENST00000354265	BBS9_ENST00000354265
BBX
BBX_ENST00000325805	BBX_ENST00000325805	BBX_ENST00000325805
BCAM	BCAM	BCAM
BCAN
BCAN_ENST00000361588	BCAN_ENST00000361588	BCAN_ENST00000361588
BCAR1	BCAR1	BCAR1
BCAR1_ENST00000393420	BCAR1_ENST00000393420	BCAR1_ENST00000393420
BCAR1_ENST00000393422	BCAR1_ENST00000393422	BCAR1_ENST00000393422
BCAR1_ENST00000418647	BCAR1_ENST00000418647	BCAR1_ENST00000418647
BCAR1_ENST00000420641	BCAR1_ENST00000420641	BCAR1_ENST00000420641
BCAR3	BCAR3	BCAR3
BCAR3_ENST00000370247	BCAR3_ENST00000370247	BCAR3_ENST00000370247
BCAS1	BCAS1	BCAS1
BCAS1_ENST00000371440	BCAS1_ENST00000371440	BCAS1_ENST00000371440
BCAS3	BCAS3	BCAS3
BCAS3_ENST00000589222	BCAS3_ENST00000589222	BCAS3_ENST00000589222
BCAT1	BCAT1	BCAT1
BCAT2	BCAT2	BCAT2
BCKDHA	BCKDHA	BCKDHA
BCKDK	BCKDK	BCKDK
BCKDK_ENST00000394951	BCKDK_ENST00000394951	BCKDK_ENST00000394951
BCL11B	BCL11B	BCL11B
BCL6B	BCL6B	BCL6B
BCL6B_ENST00000293805	BCL6B_ENST00000293805	BCL6B_ENST00000293805
BCL9_ENST00000234739	BCL9_ENST00000234739	BCL9_ENST00000234739
BCL9L_ENST00000334801	BCL9L_ENST00000334801	BCL9L_ENST00000334801
BCO2	BCO2	BCO2
BDP1	BDP1	BDP1
BEGAIN	BEGAIN	BEGAIN
BEND2	BEND2	BEND2
BEND2_ENST00000380030	BEND2_ENST00000380030	BEND2_ENST00000380030
BEND4	BEND4	BEND4
BEND5
BEND5_ENST00000371833	BEND5_ENST00000371833	BEND5_ENST00000371833
BEST3_ENST00000330891	BEST3_ENST00000330891	BEST3_ENST00000330891
BEST3_ENST00000331471	BEST3_ENST00000331471	BEST3_ENST00000331471
BFSP1	BFSP1	BFSP1
BFSP1_ENST00000377868	BFSP1_ENST00000377868	BFSP1_ENST00000377868
BFSP2	BFSP2	BFSP2
BGN
BHLHB9	BHLHB9	BHLHB9
BHMT
BICD1	BICD1	BICD1
BICD2	BICD2	BICD2
BICD2_ENST00000375512	BICD2_ENST00000375512	BICD2_ENST00000375512
BIRC6	BIRC6	BIRC6
BIRC6_ENST00000421745	BIRC6_ENST00000421745	BIRC6_ENST00000421745
BIRC8	BIRC8	BIRC8
BLK	BLK	BLK
BLNK	BLNK	BLNK
BLNK_ENST00000427367	BLNK_ENST00000427367	BLNK_ENST00000427367
BMP1	BMP1	BMP1
BMP1_ENST00000306349	BMP1_ENST00000306349	BMP1_ENST00000306349
BMP1_ENST00000397814	BMP1_ENST00000397814	BMP1_ENST00000397814
BMP1_ENST00000397816	BMP1_ENST00000397816	BMP1_ENST00000397816
BMP10	BMP10	BMP10
BMP15	BMP15	BMP15
BMP2K_ENST00000335016	BMP2K_ENST00000335016	BMP2K_ENST00000335016
BMP2K_ENST00000502871	BMP2K_ENST00000502871	BMP2K_ENST00000502871
BMP3	BMP3	BMP3
BMP4	BMP4	BMP4
BMP5
BMPER	BMPER	BMPER
BMPR1B_ENST00000440890	BMPR1B_ENST00000440890	BMPR1B_ENST00000440890
BMS1	BMS1	BMS1
BMX	BMX	BMX
BNC1	BNC1	BNC1
BNC2	BNC2	BNC2
BNC2_ENST00000380666	BNC2_ENST00000380666	BNC2_ENST00000380666
BNC2_ENST00000411752	BNC2_ENST00000411752	BNC2_ENST00000411752
BNC2_ENST00000418777	BNC2_ENST00000418777	BNC2_ENST00000418777
BOC	BOC	BOC
BOD1L	BOD1L	BOD1L
BPIFB4	BPIFB4	BPIFB4
BPIL3	BPIL3	BPIL3
BPTF	BPTF	BPTF
BPTF_ENST00000335221	BPTF_ENST00000335221	BPTF_ENST00000335221
BRAT1
BRD1	BRD1	BRD1
BRD1_ENST00000342989	BRD1_ENST00000342989	BRD1_ENST00000342989
BRD2_ENST00000395289	BRD2_ENST00000395289	BRD2_ENST00000395289
BRD4_ENST00000360016	BRD4_ENST00000360016	BRD4_ENST00000360016
BRD8	BRD8	BRD8
BRD8_ENST00000230901	BRD8_ENST00000230901	BRD8_ENST00000230901
BRD9	BRD9	BRD9
BRD9_ENST00000467963	BRD9_ENST00000467963	BRD9_ENST00000467963
BRDT	BRDT	BRDT
BRF1	BRF1	BRF1
BRF1_ENST00000440513	BRF1_ENST00000440513	BRF1_ENST00000440513
BRPF1	BRPF1	BRPF1
BRPF3	BRPF3	BRPF3
BRS3	BRS3	BRS3
BRSK1_ENST00000309383	BRSK1_ENST00000309383	BRSK1_ENST00000309383
BRSK2_ENST00000308219	BRSK2_ENST00000308219	BRSK2_ENST00000308219
BRSK2_ENST00000308230	BRSK2_ENST00000308230	BRSK2_ENST00000308230
BRSK2_ENST00000382179	BRSK2_ENST00000382179	BRSK2_ENST00000382179
BRSK2_ENST00000528841
BRWD3	BRWD3	BRWD3
BSG	BSG	BSG
BSN	BSN	BSN
BSND	BSND	BSND
BTAF1	BTAF1	BTAF1
BTBD11	BTBD11	BTBD11
BTBD11_ENST00000357167	BTBD11_ENST00000357167	BTBD11_ENST00000357167
BTBD11_ENST00000490090	BTBD11_ENST00000490090	BTBD11_ENST00000490090
BTBD16
BTBD3	BTBD3	BTBD3
BTBD9	BTBD9	BTBD9
BTBD9_ENST00000403056	BTBD9_ENST00000403056	BTBD9_ENST00000403056
BTN1A1	BTN1A1	BTN1A1
BTN2A1	BTN2A1	BTN2A1
BTN2A1_ENST00000265424	BTN2A1_ENST00000265424	BTN2A1_ENST00000265424
BTN2A2	BTN2A2	BTN2A2
BTN2A3
BTN3A3	BTN3A3	BTN3A3
BTNL2
BTNL8
BTNL8_ENST00000340184	BTNL8_ENST00000340184	BTNL8_ENST00000340184
BTNL9	BTNL9	BTNL9
BTNL9_ENST00000376842	BTNL9_ENST00000376842	BTNL9_ENST00000376842
BUB1B	BUB1B	BUB1B
BUB1B_ENST00000412359	BUB1B_ENST00000412359	BUB1B_ENST00000412359
BUD13
BVES	BVES	BVES
BZRAP1	BZRAP1	BZRAP1
BZRAP1_ENST00000355701	BZRAP1_ENST00000355701	BZRAP1_ENST00000355701
C10orf112	C10orf112	C10orf112
C10orf12	C10orf12	C10orf12
C10orf120	C10orf120	C10orf120
C10orf137	C10orf137	C10orf137
C10orf18	C10orf18	C10orf18
C10orf2
C10orf6	C10orf6	C10orf6
C10orf68_ENST00000375025
C10orf71_ENST00000323868	C10orf71_ENST00000323868	C10orf71_ENST00000323868
C10orf71_ENST00000374144	C10orf71_ENST00000374144	C10orf71_ENST00000374144
C10orf76
C10orf90	C10orf90	C10orf90
C10orf90_ENST00000368674	C10orf90_ENST00000368674	C10orf90_ENST00000368674
C10orf90_ENST00000544758	C10orf90_ENST00000544758	C10orf90_ENST00000544758
C10orf92	C10orf92	C10orf92
C10orf93_ENST00000368582	C10orf93_ENST00000368582	C10orf93_ENST00000368582
C11orf30	C11orf30	C11orf30
C11orf35	C11orf35	C11orf35
C11orf41	C11orf41	C11orf41
C11orf41_ENST00000321505	C11orf41_ENST00000321505	C11orf41_ENST00000321505
C11orf63	C11orf63	C11orf63
C11orf63_ENST00000307257	C11orf63_ENST00000307257	C11orf63_ENST00000307257
C11orf66	C11orf66	C11orf66
C11orf82	C11orf82	C11orf82
C12orf40	C12orf40	C12orf40
C12orf40_ENST00000398716	C12orf40_ENST00000398716	C12orf40_ENST00000398716
C12orf42	C12orf42	C12orf42
C12orf50
C12orf51	C12orf51	C12orf51
C12orf51_ENST00000377560	C12orf51_ENST00000377560	C12orf51_ENST00000377560
C12orf56	C12orf56	C12orf56
C12orf63	C12orf63	C12orf63
C13orf23	C13orf23	C13orf23
C13orf40	C13orf40	C13orf40
C14orf101	C14orf101	C14orf101
C14orf102	C14orf102	C14orf102
C14orf159	C14orf159	C14orf159
C14orf166B	C14orf166B	C14orf166B
C14orf21	C14orf21	C14orf21
C14orf37	C14orf37	C14orf37
C14orf49	C14orf49	C14orf49
C14orf50	C14orf50	C14orf50
C15orf2	C15orf2	C15orf2
C15orf39	C15orf39	C15orf39
C15orf39_ENST00000567617	C15orf39_ENST00000567617	C15orf39_ENST00000567617
C15orf42	C15orf42	C15orf42
C16orf62	C16orf62	C16orf62
C16orf62_ENST00000438132	C16orf62_ENST00000438132	C16orf62_ENST00000438132
C16orf62_ENST00000448695	C16orf62_ENST00000448695	C16orf62_ENST00000448695
C16orf7	C16orf7	C16orf7
C16orf71	C16orf71	C16orf71
C16orf78	C16orf78	C16orf78
C16orf96	C16orf96	C16orf96
C17orf101	C17orf101	C17orf101
C17orf47	C17orf47	C17orf47
C17orf53	C17orf53	C17orf53
C17orf56	C17orf56	C17orf56
C17orf74	C17orf74	C17orf74
C17orf80	C17orf80	C17orf80
C17orf97_ENST00000360127	C17orf97_ENST00000360127	C17orf97_ENST00000360127
C18orf1	C18orf1	C18orf1
C18orf8	C18orf8	C18orf8
C19orf2	C19orf2	C19orf2
C19orf21	C19orf21	C19orf21
C19orf26
C19orf28	C19orf28	C19orf28
C19orf29	C19orf29	C19orf29
C19orf29_ENST00000429344	C19orf29_ENST00000429344	C19orf29_ENST00000429344
C19orf44	C19orf44	C19orf44
C19orf51	C19orf51	C19orf51
C19orf55	C19orf55	C19orf55
C19orf57	C19orf57	C19orf57
C19orf6	C19orf6	C19orf6
C19orf75
C1orf101
C1orf101_ENST00000366534	C1orf101_ENST00000366534	C1orf101_ENST00000366534
C1orf112	C1orf112	C1orf112
C1orf116	C1orf116	C1orf116
C1orf127	C1orf127	C1orf127
C1orf127_ENST00000377004	C1orf127_ENST00000377004	C1orf127_ENST00000377004
C1orf129	C1orf129	C1orf129
C1orf129_ENST00000367759	C1orf129_ENST00000367759	C1orf129_ENST00000367759
C1orf150	C1orf150	C1orf150
C1orf167_ENST00000433342	C1orf167_ENST00000433342	C1orf167_ENST00000433342
C1orf168	C1orf168	C1orf168
C1orf172	C1orf172	C1orf172
C1orf173	C1orf173	C1orf173
C1orf173_ENST00000420661	C1orf173_ENST00000420661	C1orf173_ENST00000420661
C1orf177	C1orf177	C1orf177
C1orf65	C1orf65	C1orf65
C1orf87	C1orf87	C1orf87
C1R	C1R	C1R
C1RL	C1RL	C1RL
C1S	C1S	C1S
C2
C20orf112	C20orf112	C20orf112
C20orf114
C20orf132_ENST00000400441	C20orf132_ENST00000400441	C20orf132_ENST00000400441
C20orf133	C20orf133	C20orf133
C20orf151	C20orf151	C20orf151
C20orf152	C20orf152	C20orf152
C20orf177	C20orf177	C20orf177
C20orf26	C20orf26	C20orf26
C20orf26_ENST00000377306	C20orf26_ENST00000377306	C20orf26_ENST00000377306
C20orf74	C20orf74	C20orf74
C2CD2	C2CD2	C2CD2
C2CD2L	C2CD2L	C2CD2L
C2CD3	C2CD3	C2CD3
C2CD3_ENST00000334126	C2CD3_ENST00000334126	C2CD3_ENST00000334126
C2orf16	C2orf16	C2orf16
C2orf16_ENST00000408964	C2orf16_ENST00000408964	C2orf16_ENST00000408964
C2orf42	C2orf42	C2orf42
C2orf44	C2orf44	C2orf44
C2orf55	C2orf55	C2orf55
C2orf57	C2orf57	C2orf57
C2orf62	C2orf62	C2orf62
C2orf71	C2orf71	C2orf71
C2orf77	C2orf77	C2orf77
C2orf77_ENST00000447353	C2orf77_ENST00000447353	C2orf77_ENST00000447353
C2orf78	C2orf78	C2orf78
C2orf78_ENST00000409561	C2orf78_ENST00000409561	C2orf78_ENST00000409561
C3	C3	C3
C3AR1	C3AR1	C3AR1
C3orf15	C3orf15	C3orf15
C3orf20	C3orf20	C3orf20
C3orf25	C3orf25	C3orf25
C3orf30	C3orf30	C3orf30
C3orf39	C3orf39	C3orf39
C3orf64
C3orf67_ENST00000482387	C3orf67_ENST00000482387	C3orf67_ENST00000482387
C4BPA	C4BPA	C4BPA
C4orf14	C4orf14	C4orf14
C4orf21	C4orf21	C4orf21
C4orf21_ENST00000505019	C4orf21_ENST00000505019	C4orf21_ENST00000505019
C4orf37	C4orf37	C4orf37
C4orf41	C4orf41	C4orf41
C4orf50_ENST00000531445	C4orf50_ENST00000531445	C4orf50_ENST00000531445
C5	C5	C5
C5orf65
C6	C6	C6
C6orf118	C6orf118	C6orf118
C6orf118_ENST00000543069	C6orf118_ENST00000543069	C6orf118_ENST00000543069
C6orf138	C6orf138	C6orf138
C6orf170	C6orf170	C6orf170
C6orf204	C6orf204	C6orf204
C6orf213	C6orf213	C6orf213
C6orf221	C6orf221	C6orf221
C6orf222	C6orf222	C6orf222
C6orf25
C6orf27	C6orf27	C6orf27
C6orf70	C6orf70	C6orf70
C6orf97	C6orf97	C6orf97
C7	C7	C7
C7_ENST00000313164	C7_ENST00000313164	C7_ENST00000313164
C7orf10	C7orf10	C7orf10
C7orf10_ENST00000309930	C7orf10_ENST00000309930	C7orf10_ENST00000309930
C7orf31	C7orf31	C7orf31
C7orf58	C7orf58	C7orf58
C7orf62	C7orf62	C7orf62
C8B	C8B	C8B
C8orf34	C8orf34	C8orf34
C8orf34_ENST00000518698	C8orf34_ENST00000518698	C8orf34_ENST00000518698
C8orf80	C8orf80	C8orf80
C9	C9	C9
C9orf102	C9orf102	C9orf102
C9orf125	C9orf125	C9orf125
C9orf171	C9orf171	C9orf171
C9orf172	C9orf172	C9orf172
C9orf174	C9orf174	C9orf174
C9orf174_ENST00000395220	C9orf174_ENST00000395220	C9orf174_ENST00000395220
C9orf3	C9orf3	C9orf3
C9orf3_ENST00000375315	C9orf3_ENST00000375315	C9orf3_ENST00000375315
C9orf43	C9orf43	C9orf43
C9orf48	C9orf48	C9orf48
C9orf5	C9orf5	C9orf5
C9orf50	C9orf50	C9orf50
C9orf79	C9orf79	C9orf79
C9orf84	C9orf84	C9orf84
C9orf84_ENST00000374287	C9orf84_ENST00000374287	C9orf84_ENST00000374287
C9orf86	C9orf86	C9orf86
C9orf86_ENST00000371663	C9orf86_ENST00000371663	C9orf86_ENST00000371663
C9orf93	C9orf93	C9orf93
C9orf93_ENST00000380689	C9orf93_ENST00000380689	C9orf93_ENST00000380689
C9orf96
C9orf96_ENST00000371957
C9orf98_ENST00000298545	C9orf98_ENST00000298545	C9orf98_ENST00000298545
CA10	CA10	CA10
CA10_ENST00000340813	CA10_ENST00000340813	CA10_ENST00000340813
CA8	CA8	CA8
CA9	CA9	CA9
CABIN1	CABIN1	CABIN1
CABS1	CABS1	CABS1
CACHD1	CACHD1	CACHD1
CACHD1_ENST00000371073	CACHD1_ENST00000371073	CACHD1_ENST00000371073
CACNA1A	CACNA1A	CACNA1A
CACNA1A_ENST00000325084	CACNA1A_ENST00000325084	CACNA1A_ENST00000325084
CACNA1A_ENST00000357018	CACNA1A_ENST00000357018	CACNA1A_ENST00000357018
CACNA1A_ENST00000360228	CACNA1A_ENST00000360228	CACNA1A_ENST00000360228
CACNA1B_ENST00000371355	CACNA1B_ENST00000371355	CACNA1B_ENST00000371355
CACNA1D	CACNA1D	CACNA1D
CACNA1D_ENST00000350061	CACNA1D_ENST00000350061	CACNA1D_ENST00000350061
CACNA1E	CACNA1E	CACNA1E
CACNA1E_ENST00000357570	CACNA1E_ENST00000357570	CACNA1E_ENST00000357570
CACNA1E_ENST00000358338	CACNA1E_ENST00000358338	CACNA1E_ENST00000358338
CACNA1E_ENST00000367567	CACNA1E_ENST00000367567	CACNA1E_ENST00000367567
CACNA1E_ENST00000367573	CACNA1E_ENST00000367573	CACNA1E_ENST00000367573
CACNA1F	CACNA1F	CACNA1F
CACNA1G	CACNA1G	CACNA1G
CACNA1G_ENST00000354983	CACNA1G_ENST00000354983	CACNA1G_ENST00000354983
CACNA1G_ENST00000359106	CACNA1G_ENST00000359106	CACNA1G_ENST00000359106
CACNA1G_ENST00000416767	CACNA1G_ENST00000416767	CACNA1G_ENST00000416767
CACNA1H	CACNA1H	CACNA1H
CACNA1H_ENST00000348261	CACNA1H_ENST00000348261	CACNA1H_ENST00000348261
CACNA1H_ENST00000358590	CACNA1H_ENST00000358590	CACNA1H_ENST00000358590
CACNA1I	CACNA1I	CACNA1I
CACNA1I_ENST00000336649	CACNA1I_ENST00000336649	CACNA1I_ENST00000336649
CACNA1I_ENST00000400164	CACNA1I_ENST00000400164	CACNA1I_ENST00000400164
CACNA1I_ENST00000402142	CACNA1I_ENST00000402142	CACNA1I_ENST00000402142
CACNA2D1_ENST00000356253	CACNA2D1_ENST00000356253	CACNA2D1_ENST00000356253
CACNA2D3	CACNA2D3	CACNA2D3
CACNA2D4	CACNA2D4	CACNA2D4
CACNA2D4_ENST00000382722	CACNA2D4_ENST00000382722	CACNA2D4_ENST00000382722
CACNB2	CACNB2	CACNB2
CACNB2_ENST00000282343	CACNB2_ENST00000282343	CACNB2_ENST00000282343
CACNB2_ENST00000352115	CACNB2_ENST00000352115	CACNB2_ENST00000352115
CACNB2_ENST00000377315	CACNB2_ENST00000377315	CACNB2_ENST00000377315
CACNB2_ENST00000377319	CACNB2_ENST00000377319	CACNB2_ENST00000377319
CACNB2_ENST00000377329	CACNB2_ENST00000377329	CACNB2_ENST00000377329
CACNB3	CACNB3	CACNB3
CACNB4	CACNB4	CACNB4
CACNB4_ENST00000339254	CACNB4_ENST00000339254	CACNB4_ENST00000339254
CACNB4_ENST00000534999	CACNB4_ENST00000534999	CACNB4_ENST00000534999
CACNB4_ENST00000539935	CACNB4_ENST00000539935	CACNB4_ENST00000539935
CACNG3	CACNG3	CACNG3
CACNG5_ENST00000533854	CACNG5_ENST00000533854	CACNG5_ENST00000533854
CAD	CAD	CAD
CADM1	CADM1	CADM1
CADM2_ENST00000383699	CADM2_ENST00000383699	CADM2_ENST00000383699
CADM3	CADM3	CADM3
CADPS	CADPS	CADPS
CADPS_ENST00000383710	CADPS_ENST00000383710	CADPS_ENST00000383710
CADPS2	CADPS2	CADPS2
CADPS2_ENST00000313070	CADPS2_ENST00000313070	CADPS2_ENST00000313070
CAGE1	CAGE1	CAGE1
CAGE1_ENST00000338150	CAGE1_ENST00000338150	CAGE1_ENST00000338150
CAGE1_ENST00000502583	CAGE1_ENST00000502583	CAGE1_ENST00000502583
CALCOCO1	CALCOCO1	CALCOCO1
CALCR	CALCR	CALCR
CALCR_ENST00000359558	CALCR_ENST00000359558	CALCR_ENST00000359558
CALCRL	CALCRL	CALCRL
CALD1	CALD1	CALD1
CALN1	CALN1	CALN1
CALN1_ENST00000395275	CALN1_ENST00000395275	CALN1_ENST00000395275
CALR	CALR	CALR
CALR3	CALR3	CALR3
CAMK1D	CAMK1D	CAMK1D
CAMK1D_ENST00000378847	CAMK1D_ENST00000378847	CAMK1D_ENST00000378847
CAMK2A	CAMK2A	CAMK2A
CAMK2B	CAMK2B	CAMK2B
CAMK2G	CAMK2G	CAMK2G
CAMK2G_ENST00000322635	CAMK2G_ENST00000322635	CAMK2G_ENST00000322635
CAMK2G_ENST00000322680	CAMK2G_ENST00000322680	CAMK2G_ENST00000322680
CAMK4	CAMK4	CAMK4
CAMKK1	CAMKK1	CAMKK1
CAMKK1_ENST00000158166	CAMKK1_ENST00000158166	CAMKK1_ENST00000158166
CAMKK2	CAMKK2	CAMKK2
CAMKK2_ENST00000392473	CAMKK2_ENST00000392473	CAMKK2_ENST00000392473
CAMKK2_ENST00000392474	CAMKK2_ENST00000392474	CAMKK2_ENST00000392474
CAMKV	CAMKV	CAMKV
CAMKV_ENST00000477224	CAMKV_ENST00000477224	CAMKV_ENST00000477224
CAMSAP1	CAMSAP1	CAMSAP1
CAMSAP1_ENST00000409386	CAMSAP1_ENST00000409386	CAMSAP1_ENST00000409386
CAMSAP3	CAMSAP3	CAMSAP3
CAMSAP3_ENST00000446248	CAMSAP3_ENST00000446248	CAMSAP3_ENST00000446248
CAMTA1_ENST00000439411	CAMTA1_ENST00000439411	CAMTA1_ENST00000439411
CAMTA2	CAMTA2	CAMTA2
CAMTA2_ENST00000381311	CAMTA2_ENST00000381311	CAMTA2_ENST00000381311
CAMTA2_ENST00000414043	CAMTA2_ENST00000414043	CAMTA2_ENST00000414043
CAND1	CAND1	CAND1
CAND2_ENST00000456430	CAND2_ENST00000456430	CAND2_ENST00000456430
CANT1	CANT1	CANT1
CAP2	CAP2	CAP2
CAPN11	CAPN11	CAPN11
CAPN12	CAPN12	CAPN12
CAPN13	CAPN13	CAPN13
CAPN14	CAPN14	CAPN14
CAPN14_ENST00000444918	CAPN14_ENST00000444918	CAPN14_ENST00000444918
CAPN2	CAPN2	CAPN2
CAPN3	CAPN3	CAPN3
CAPN3_ENST00000318023	CAPN3_ENST00000318023	CAPN3_ENST00000318023
CAPN3_ENST00000356316	CAPN3_ENST00000356316	CAPN3_ENST00000356316
CAPN3_ENST00000397163	CAPN3_ENST00000397163	CAPN3_ENST00000397163
CAPN5	CAPN5	CAPN5
CAPN6	CAPN6	CAPN6
CAPN9	CAPN9	CAPN9
CAPN9_ENST00000271971	CAPN9_ENST00000271971	CAPN9_ENST00000271971
CAPRIN2	CAPRIN2	CAPRIN2
CAPRIN2_ENST00000417045
CARD10	CARD10	CARD10
CARD14	CARD14	CARD14
CARD6	CARD6	CARD6
CARD8_ENST00000391898	CARD8_ENST00000391898	CARD8_ENST00000391898
CARM1	CARM1	CARM1
CARNS1_ENST00000445895	CARNS1_ENST00000445895	CARNS1_ENST00000445895
CARS2	CARS2	CARS2
CASC1	CASC1	CASC1
CASC1_ENST00000354189
CASC3	CASC3	CASC3
CASC5_ENST00000346991
CASK
CASK_ENST00000318588
CASKIN1	CASKIN1	CASKIN1
CASKIN1_ENST00000382453	CASKIN1_ENST00000382453	CASKIN1_ENST00000382453
CASKIN2	CASKIN2	CASKIN2
CASP2	CASP2	CASP2
CASP5	CASP5	CASP5
CASQ1	CASQ1	CASQ1
CASQ2	CASQ2	CASQ2
CASR	CASR	CASR
CASS4	CASS4	CASS4
CASZ1	CASZ1	CASZ1
CATSPER1	CATSPER1	CATSPER1
CATSPER2	CATSPER2	CATSPER2
CATSPER4	CATSPER4	CATSPER4
CATSPERB	CATSPERB	CATSPERB
CATSPERB_ENST00000256343	CATSPERB_ENST00000256343	CATSPERB_ENST00000256343
CATSPERG	CATSPERG	CATSPERG
CATSPERG_ENST00000409235	CATSPERG_ENST00000409235	CATSPERG_ENST00000409235
CBFA2T2	CBFA2T2	CBFA2T2
CBFA2T2_ENST00000342704	CBFA2T2_ENST00000342704	CBFA2T2_ENST00000342704
CBFA2T3	CBFA2T3	CBFA2T3
CBLB	CBLB	CBLB
CBLB_ENST00000394027	CBLB_ENST00000394027	CBLB_ENST00000394027
CBLN2	CBLN2	CBLN2
CBX8	CBX8	CBX8
CC2D1A	CC2D1A	CC2D1A
CC2D1B	CC2D1B	CC2D1B
CC2D2A	CC2D2A	CC2D2A
CC2D2A_ENST00000424120	CC2D2A_ENST00000424120	CC2D2A_ENST00000424120
CCBE1	CCBE1	CCBE1
CCBL2	CCBL2	CCBL2
CCDC102A	CCDC102A	CCDC102A
CCDC102B
CCDC102B_ENST00000358653
CCDC105	CCDC105	CCDC105
CCDC108	CCDC108	CCDC108
CCDC11	CCDC11	CCDC11
CCDC110	CCDC110	CCDC110
CCDC111	CCDC111	CCDC111
CCDC120	CCDC120	CCDC120
CCDC129	CCDC129	CCDC129
CCDC129_ENST00000451887	CCDC129_ENST00000451887	CCDC129_ENST00000451887
CCDC13	CCDC13	CCDC13
CCDC135	CCDC135	CCDC135
CCDC136	CCDC136	CCDC136
CCDC136_ENST00000297788	CCDC136_ENST00000297788	CCDC136_ENST00000297788
CCDC138	CCDC138	CCDC138
CCDC141	CCDC141	CCDC141
CCDC141_ENST00000420890	CCDC141_ENST00000420890	CCDC141_ENST00000420890
CCDC144A	CCDC144A	CCDC144A
CCDC144A_ENST00000456009	CCDC144A_ENST00000456009	CCDC144A_ENST00000456009
CCDC144B
CCDC146	CCDC146	CCDC146
CCDC147	CCDC147	CCDC147
CCDC150	CCDC150	CCDC150
CCDC151	CCDC151	CCDC151
CCDC155	CCDC155	CCDC155
CCDC157	CCDC157	CCDC157
CCDC157_ENST00000405659	CCDC157_ENST00000405659	CCDC157_ENST00000405659
CCDC158	CCDC158	CCDC158
CCDC164	CCDC164	CCDC164
CCDC165	CCDC165	CCDC165
CCDC166	CCDC166	CCDC166
CCDC27
CCDC33	CCDC33	CCDC33
CCDC33_ENST00000321288	CCDC33_ENST00000321288	CCDC33_ENST00000321288
CCDC37	CCDC37	CCDC37
CCDC38	CCDC38	CCDC38
CCDC39	CCDC39	CCDC39
CCDC39_ENST00000442201	CCDC39_ENST00000442201	CCDC39_ENST00000442201
CCDC40	CCDC40	CCDC40
CCDC40_ENST00000269318	CCDC40_ENST00000269318	CCDC40_ENST00000269318
CCDC40_ENST00000374877	CCDC40_ENST00000374877	CCDC40_ENST00000374877
CCDC48_ENST00000480450
CCDC50	CCDC50	CCDC50
CCDC54	CCDC54	CCDC54
CCDC57	CCDC57	CCDC57
CCDC57_ENST00000389641	CCDC57_ENST00000389641	CCDC57_ENST00000389641
CCDC60	CCDC60	CCDC60
CCDC62	CCDC62	CCDC62
CCDC62_ENST00000253079	CCDC62_ENST00000253079	CCDC62_ENST00000253079
CCDC63	CCDC63	CCDC63
CCDC64	CCDC64	CCDC64
CCDC64B	CCDC64B	CCDC64B
CCDC67
CCDC71
CCDC8	CCDC8	CCDC8
CCDC80	CCDC80	CCDC80
CCDC81	CCDC81	CCDC81
CCDC81_ENST00000445632	CCDC81_ENST00000445632	CCDC81_ENST00000445632
CCDC83	CCDC83	CCDC83
CCDC85A	CCDC85A	CCDC85A
CCDC87	CCDC87	CCDC87
CCDC88B	CCDC88B	CCDC88B
CCDC88B_ENST00000359902	CCDC88B_ENST00000359902	CCDC88B_ENST00000359902
CCDC88C	CCDC88C	CCDC88C
CCDC88C_ENST00000389857	CCDC88C_ENST00000389857	CCDC88C_ENST00000389857
CCDC93	CCDC93	CCDC93
CCDC96	CCDC96	CCDC96
CCDC99	CCDC99	CCDC99
CCHCR1
CCIN	CCIN	CCIN
CCKAR	CCKAR	CCKAR
CCM2	CCM2	CCM2
CCNA1	CCNA1	CCNA1
CCNB3	CCNB3	CCNB3
CCNL1	CCNL1	CCNL1
CCNL2	CCNL2	CCNL2
CCNT1	CCNT1	CCNT1
CCNT2	CCNT2	CCNT2
CCNT2_ENST00000264157	CCNT2_ENST00000264157	CCNT2_ENST00000264157
CCP110	CCP110	CCP110
CCPG1	CCPG1	CCPG1
CCR3	CCR3	CCR3
CCR3_ENST00000545097	CCR3_ENST00000545097	CCR3_ENST00000545097
CCR5	CCR5	CCR5
CCR9	CCR9	CCR9
CCT5	CCT5	CCT5
CCT6B	CCT6B	CCT6B
CCT8	CCT8	CCT8
CCT8L2	CCT8L2	CCT8L2
CD101	CD101	CD101
CD109	CD109	CD109
CD163	CD163	CD163
CD163_ENST00000396620	CD163_ENST00000396620	CD163_ENST00000396620
CD163L1	CD163L1	CD163L1
CD180	CD180	CD180
CD19	CD19	CD19
CD1A	CD1A	CD1A
CD1B	CD1B	CD1B
CD1C	CD1C	CD1C
CD1E
CD1E_ENST00000434258
CD2	CD2	CD2
CD200R1L	CD200R1L	CD200R1L
CD209	CD209	CD209
CD209_ENST00000315599	CD209_ENST00000315599	CD209_ENST00000315599
CD209_ENST00000601951	CD209_ENST00000601951	CD209_ENST00000601951
CD22	CD22	CD22
CD226	CD226	CD226
CD248	CD248	CD248
CD276	CD276	CD276
CD2AP	CD2AP	CD2AP
CD300LG	CD300LG	CD300LG
CD33	CD33	CD33
CD36	CD36	CD36
CD36_ENST00000433696	CD36_ENST00000433696	CD36_ENST00000433696
CD36_ENST00000435819	CD36_ENST00000435819	CD36_ENST00000435819
CD36_ENST00000447544	CD36_ENST00000447544	CD36_ENST00000447544
CD44	CD44	CD44
CD5	CD5	CD5
CD5L	CD5L	CD5L
CD6	CD6	CD6
CD6_ENST00000313421	CD6_ENST00000313421	CD6_ENST00000313421
CD84	CD84	CD84
CD84_ENST00000311224	CD84_ENST00000311224	CD84_ENST00000311224
CD86
CD96	CD96	CD96
CDAN1	CDAN1	CDAN1
CDC27	CDC27	CDC27
CDC27_ENST00000531206	CDC27_ENST00000531206	CDC27_ENST00000531206
CDC37	CDC37	CDC37
CDC42BPA_ENST00000334218	CDC42BPA_ENST00000334218	CDC42BPA_ENST00000334218
CDC42BPA_ENST00000366765	CDC42BPA_ENST00000366765	CDC42BPA_ENST00000366765
CDC42BPA_ENST00000366766	CDC42BPA_ENST00000366766	CDC42BPA_ENST00000366766
CDC42BPA_ENST00000366769	CDC42BPA_ENST00000366769	CDC42BPA_ENST00000366769
CDC42BPB	CDC42BPB	CDC42BPB
CDC42BPG_ENST00000342711	CDC42BPG_ENST00000342711	CDC42BPG_ENST00000342711
CDC45	CDC45	CDC45
CDC45_ENST00000437685	CDC45_ENST00000437685	CDC45_ENST00000437685
CDC5L
CDCA2	CDCA2	CDCA2
CDCP1	CDCP1	CDCP1
CDH10	CDH10	CDH10
CDH12	CDH12	CDH12
CDH13	CDH13	CDH13
CDH13_ENST00000268613	CDH13_ENST00000268613	CDH13_ENST00000268613
CDH15	CDH15	CDH15
CDH16	CDH16	CDH16
CDH17	CDH17	CDH17
CDH18	CDH18	CDH18
CDH18_ENST00000507958	CDH18_ENST00000507958	CDH18_ENST00000507958
CDH19
CDH2	CDH2	CDH2
CDH20	CDH20	CDH20
CDH24	CDH24	CDH24
CDH24_ENST00000397359	CDH24_ENST00000397359	CDH24_ENST00000397359
CDH3_ENST00000429102	CDH3_ENST00000429102	CDH3_ENST00000429102
CDH4	CDH4	CDH4
CDH5	CDH5	CDH5
CDH6	CDH6	CDH6
CDH7	CDH7	CDH7
CDH7_ENST00000323011	CDH7_ENST00000323011	CDH7_ENST00000323011
CDH8	CDH8	CDH8
CDH9	CDH9	CDH9
CDHR1	CDHR1	CDHR1
CDHR1_ENST00000332904	CDHR1_ENST00000332904	CDHR1_ENST00000332904
CDHR2	CDHR2	CDHR2
CDHR4	CDHR4	CDHR4
CDHR5	CDHR5	CDHR5
CDK11A	CDK11A	CDK11A
CDK13	CDK13	CDK13
CDK14	CDK14	CDK14
CDK14_ENST00000380050	CDK14_ENST00000380050	CDK14_ENST00000380050
CDK19	CDK19	CDK19
CDK5RAP1	CDK5RAP1	CDK5RAP1
CDK5RAP2	CDK5RAP2	CDK5RAP2
CDK6	CDK6	CDK6
CDKL5	CDKL5	CDKL5
CDKN2A_ENST00000361570	CDKN2A_ENST00000361570	CDKN2A_ENST00000361570
CDON	CDON	CDON
CDR1	CDR1	CDR1
CDS1
CDYL	CDYL	CDYL
CDYL2	CDYL2	CDYL2
CEACAM20	CEACAM20	CEACAM20
CEACAM5	CEACAM5	CEACAM5
CEACAM6	CEACAM6	CEACAM6
CEACAM7	CEACAM7	CEACAM7
CEACAM8	CEACAM8	CEACAM8
CECR1	CECR1	CECR1
CECR2	CECR2	CECR2
CECR2_ENST00000262608	CECR2_ENST00000262608	CECR2_ENST00000262608
CECR5	CECR5	CECR5
CECR5_ENST00000155674	CECR5_ENST00000155674	CECR5_ENST00000155674
CEL	CEL	CEL
CELF1	CELF1	CELF1
CELF1_ENST00000395292	CELF1_ENST00000395292	CELF1_ENST00000395292
CELF3	CELF3	CELF3
CELF4	CELF4	CELF4
CELF6	CELF6	CELF6
CELSR2	CELSR2	CELSR2
CELSR3	CELSR3	CELSR3
CELSR3_ENST00000544264	CELSR3_ENST00000544264	CELSR3_ENST00000544264
CENPB	CENPB	CENPB
CENPF	CENPF	CENPF
CENPJ	CENPJ	CENPJ
CEP104	CEP104	CEP104
CEP112	CEP112	CEP112
CEP112_ENST00000392769	CEP112_ENST00000392769	CEP112_ENST00000392769
CEP120	CEP120	CEP120
CEP128
CEP152	CEP152	CEP152
CEP152_ENST00000380950	CEP152_ENST00000380950	CEP152_ENST00000380950
CEP164	CEP164	CEP164
CEP192	CEP192	CEP192
CEP192_ENST00000506447	CEP192_ENST00000506447	CEP192_ENST00000506447
CEP250	CEP250	CEP250
CEP350	CEP350	CEP350
CEP63	CEP63	CEP63
CEP68	CEP68	CEP68
CEP70	CEP70	CEP70
CEP72	CEP72	CEP72
CEP76	CEP76	CEP76
CEP78	CEP78	CEP78
CEP78_ENST00000376597	CEP78_ENST00000376597	CEP78_ENST00000376597
CEP85L	CEP85L	CEP85L
CEP89	CEP89	CEP89
CEP97	CEP97	CEP97
CEP97_ENST00000327230	CEP97_ENST00000327230	CEP97_ENST00000327230
CER1	CER1	CER1
CERKL	CERKL	CERKL
CERKL_ENST00000339098	CERKL_ENST00000339098	CERKL_ENST00000339098
CES1_ENST00000360526	CES1_ENST00000360526	CES1_ENST00000360526
CES2	CES2	CES2
CES3	CES3	CES3
CES4A	CES4A	CES4A
CES4A_ENST00000326686	CES4A_ENST00000326686	CES4A_ENST00000326686
CFB	CFB	CFB
CFH	CFH	CFH
CFHR1	CFHR1	CFHR1
CFHR2_ENST00000367415	CFHR2_ENST00000367415	CFHR2_ENST00000367415
CFHR4	CFHR4	CFHR4
CFHR5
CFHR5_ENST00000367414
CFTR	CFTR	CFTR
CGN	CGN	CGN
CGNL1	CGNL1	CGNL1
CHAD	CHAD	CHAD
CHAF1A	CHAF1A	CHAF1A
CHAF1B	CHAF1B	CHAF1B
CHAT	CHAT	CHAT
CHAT_ENST00000395562	CHAT_ENST00000395562	CHAT_ENST00000395562
CHD3	CHD3	CHD3
CHD4	CHD4	CHD4
CHD4_ENST00000309577	CHD4_ENST00000309577	CHD4_ENST00000309577
CHD4_ENST00000357008	CHD4_ENST00000357008	CHD4_ENST00000357008
CHD6	CHD6	CHD6
CHD7	CHD7	CHD7
CHD9	CHD9	CHD9
CHDH	CHDH	CHDH
CHERP	CHERP	CHERP
CHGB	CHGB	CHGB
CHI3L1	CHI3L1	CHI3L1
CHIA	CHIA	CHIA
CHIA_ENST00000369740	CHIA_ENST00000369740	CHIA_ENST00000369740
CHIT1	CHIT1	CHIT1
CHL1	CHL1	CHL1
CHML	CHML	CHML
CHN1	CHN1	CHN1
CHN2	CHN2	CHN2
CHN2_ENST00000539406	CHN2_ENST00000539406	CHN2_ENST00000539406
CHPF2	CHPF2	CHPF2
CHRD	CHRD	CHRD
CHRD_ENST00000342610	CHRD_ENST00000342610	CHRD_ENST00000342610
CHRDL2	CHRDL2	CHRDL2
CHRM1	CHRM1	CHRM1
CHRM2	CHRM2	CHRM2
CHRM3	CHRM3	CHRM3
CHRM5	CHRM5	CHRM5
CHRNA1	CHRNA1	CHRNA1
CHRNA10	CHRNA10	CHRNA10
CHRNA3	CHRNA3	CHRNA3
CHRNA5	CHRNA5	CHRNA5
CHRNA6	CHRNA6	CHRNA6
CHRNA9	CHRNA9	CHRNA9
CHRNB3	CHRNB3	CHRNB3
CHRNB4	CHRNB4	CHRNB4
CHRND	CHRND	CHRND
CHST13	CHST13	CHST13
CHST2	CHST2	CHST2
CHST5_ENST00000541075	CHST5_ENST00000541075	CHST5_ENST00000541075
CHST6	CHST6	CHST6
CHST9	CHST9	CHST9
CHST9_ENST00000284224	CHST9_ENST00000284224	CHST9_ENST00000284224
CHSY1	CHSY1	CHSY1
CHSY3	CHSY3	CHSY3
CHTF18	CHTF18	CHTF18
CHTF18_ENST00000455171	CHTF18_ENST00000455171	CHTF18_ENST00000455171
CILP	CILP	CILP
CILP2	CILP2	CILP2
CIR1
CIRH1A	CIRH1A	CIRH1A
CIT_ENST00000261833	CIT_ENST00000261833	CIT_ENST00000261833
CIT_ENST00000392521	CIT_ENST00000392521	CIT_ENST00000392521
CKAP2L	CKAP2L	CKAP2L
CKAP4	CKAP4	CKAP4
CKAP5	CKAP5	CKAP5
CKM	CKM	CKM
CLASP1	CLASP1	CLASP1
CLASP1_ENST00000397587	CLASP1_ENST00000397587	CLASP1_ENST00000397587
CLASP1_ENST00000455322	CLASP1_ENST00000455322	CLASP1_ENST00000455322
CLASP1_ENST00000541859	CLASP1_ENST00000541859	CLASP1_ENST00000541859
CLASP1_ENST00000545861	CLASP1_ENST00000545861	CLASP1_ENST00000545861
CLASP2	CLASP2	CLASP2
CLASP2_ENST00000480013	CLASP2_ENST00000480013	CLASP2_ENST00000480013
CLASP2_ENST00000539981	CLASP2_ENST00000539981	CLASP2_ENST00000539981
CLCA1	CLCA1	CLCA1
CLCA2	CLCA2	CLCA2
CLCA4	CLCA4	CLCA4
CLCN1	CLCN1	CLCN1
CLCN2	CLCN2	CLCN2
CLCN4	CLCN4	CLCN4
CLCN5	CLCN5	CLCN5
CLCN5_ENST00000376088	CLCN5_ENST00000376088	CLCN5_ENST00000376088
CLCN6	CLCN6	CLCN6
CLCNKA	CLCNKA	CLCNKA
CLCNKB	CLCNKB	CLCNKB
CLCNKB_ENST00000375667	CLCNKB_ENST00000375667	CLCNKB_ENST00000375667
CLEC14A	CLEC14A	CLEC14A
CLEC16A_ENST00000409552	CLEC16A_ENST00000409552	CLEC16A_ENST00000409552
CLEC3A	CLEC3A	CLEC3A
CLEC4F	CLEC4F	CLEC4F
CLEC4M	CLEC4M	CLEC4M
CLGN	CLGN	CLGN
CLIC5_ENST00000185206	CLIC5_ENST00000185206	CLIC5_ENST00000185206
CLIC6	CLIC6	CLIC6
CLINT1
CLINT1_ENST00000523094
CLIP1	CLIP1	CLIP1
CLIP1_ENST00000540338	CLIP1_ENST00000540338	CLIP1_ENST00000540338
CLIP2	CLIP2	CLIP2
CLIP2_ENST00000223398	CLIP2_ENST00000223398	CLIP2_ENST00000223398
CLIP3	CLIP3	CLIP3
CLIP4	CLIP4	CLIP4
CLK1	CLK1	CLK1
CLK1_ENST00000434813	CLK1_ENST00000434813	CLK1_ENST00000434813
CLK2	CLK2	CLK2
CLK3	CLK3	CLK3
CLK3_ENST00000454830	CLK3_ENST00000454830	CLK3_ENST00000454830
CLMN	CLMN	CLMN
CLN3	CLN3	CLN3
CLNK	CLNK	CLNK
CLNK_ENST00000226951	CLNK_ENST00000226951	CLNK_ENST00000226951
CLP1	CLP1	CLP1
CLPB	CLPB	CLPB
CLPTM1	CLPTM1	CLPTM1
CLPTM1L	CLPTM1L	CLPTM1L
CLPX	CLPX	CLPX
CLSTN1	CLSTN1	CLSTN1
CLSTN2	CLSTN2	CLSTN2
CLTC_ENST00000269122	CLTC_ENST00000269122	CLTC_ENST00000269122
CLTCL1	CLTCL1	CLTCL1
CLTCL1_ENST00000427926	CLTCL1_ENST00000427926	CLTCL1_ENST00000427926
CLU	CLU	CLU
CLUL1	CLUL1	CLUL1
CLVS2	CLVS2	CLVS2
CMIP	CMIP	CMIP
CMKLR1	CMKLR1	CMKLR1
CMYA5	CMYA5	CMYA5
CMYA5_ENST00000446378	CMYA5_ENST00000446378	CMYA5_ENST00000446378
CNBD1	CNBD1	CNBD1
CNBD1_ENST00000518476	CNBD1_ENST00000518476	CNBD1_ENST00000518476
CNDP1	CNDP1	CNDP1
CNDP2	CNDP2	CNDP2
CNGA1	CNGA1	CNGA1
CNGA2	CNGA2	CNGA2
CNGA4	CNGA4	CNGA4
CNGB1	CNGB1	CNGB1
CNGB3	CNGB3	CNGB3
CNKSR1	CNKSR1	CNKSR1
CNKSR2	CNKSR2	CNKSR2
CNKSR2_ENST00000279451	CNKSR2_ENST00000279451	CNKSR2_ENST00000279451
CNNM1	CNNM1	CNNM1
CNNM1_ENST00000356713	CNNM1_ENST00000356713	CNNM1_ENST00000356713
CNNM2_ENST00000369878	CNNM2_ENST00000369878	CNNM2_ENST00000369878
CNNM3	CNNM3	CNNM3
CNNM4	CNNM4	CNNM4
CNOT1	CNOT1	CNOT1
CNOT1_ENST00000441024	CNOT1_ENST00000441024	CNOT1_ENST00000441024
CNOT10_ENST00000454516
CNOT2	CNOT2	CNOT2
CNOT3	CNOT3	CNOT3
CNOT4	CNOT4	CNOT4
CNOT4_ENST00000262563	CNOT4_ENST00000262563	CNOT4_ENST00000262563
CNOT4_ENST00000315544	CNOT4_ENST00000315544	CNOT4_ENST00000315544
CNOT4_ENST00000414802
CNOT4_ENST00000541284	CNOT4_ENST00000541284	CNOT4_ENST00000541284
CNTLN_ENST00000380641	CNTLN_ENST00000380641	CNTLN_ENST00000380641
CNTN1	CNTN1	CNTN1
CNTN1_ENST00000547849
CNTN2	CNTN2	CNTN2
CNTN3	CNTN3	CNTN3
CNTN4	CNTN4	CNTN4
CNTN4_ENST00000418658	CNTN4_ENST00000418658	CNTN4_ENST00000418658
CNTN5	CNTN5	CNTN5
CNTN5_ENST00000524871	CNTN5_ENST00000524871	CNTN5_ENST00000524871
CNTNAP1	CNTNAP1	CNTNAP1
CNTNAP2	CNTNAP2	CNTNAP2
CNTNAP3	CNTNAP3	CNTNAP3
CNTNAP3_ENST00000358144
CNTNAP4	CNTNAP4	CNTNAP4
CNTNAP4_ENST00000307431	CNTNAP4_ENST00000307431	CNTNAP4_ENST00000307431
CNTNAP4_ENST00000478060	CNTNAP4_ENST00000478060	CNTNAP4_ENST00000478060
CNTNAP5	CNTNAP5	CNTNAP5
CNTRL_ENST00000373851	CNTRL_ENST00000373851	CNTRL_ENST00000373851
CNTRL_ENST00000373855	CNTRL_ENST00000373855	CNTRL_ENST00000373855
COASY	COASY	COASY
COBL
COBL_ENST00000395542
COBRA1	COBRA1	COBRA1
COCH	COCH	COCH
COG1	COG1	COG1
COG2	COG2	COG2
COG3	COG3	COG3
COG4	COG4	COG4
COG5	COG5	COG5
COG6	COG6	COG6
COG6_ENST00000416691	COG6_ENST00000416691	COG6_ENST00000416691
COG7	COG7	COG7
COL10A1	COL10A1	COL10A1
COL11A2	COL11A2	COL11A2
COL12A1	COL12A1	COL12A1
COL13A1	COL13A1	COL13A1
COL13A1_ENST00000356340	COL13A1_ENST00000356340	COL13A1_ENST00000356340
COL13A1_ENST00000398972	COL13A1_ENST00000398972	COL13A1_ENST00000398972
COL13A1_ENST00000398978	COL13A1_ENST00000398978	COL13A1_ENST00000398978
COL14A1	COL14A1	COL14A1
COL15A1	COL15A1	COL15A1
COL16A1	COL16A1	COL16A1
COL16A1_ENST00000271069	COL16A1_ENST00000271069	COL16A1_ENST00000271069
COL17A1	COL17A1	COL17A1
COL1A1	COL1A1	COL1A1
COL1A2	COL1A2	COL1A2
COL21A1	COL21A1	COL21A1
COL21A1_ENST00000244728
COL22A1	COL22A1	COL22A1
COL24A1	COL24A1	COL24A1
COL25A1	COL25A1	COL25A1
COL25A1_ENST00000399126	COL25A1_ENST00000399126	COL25A1_ENST00000399126
COL27A1	COL27A1	COL27A1
COL2A1	COL2A1	COL2A1
COL2A1_ENST00000380518	COL2A1_ENST00000380518	COL2A1_ENST00000380518
COL3A1	COL3A1	COL3A1
COL3A1_ENST00000317840	COL3A1_ENST00000317840	COL3A1_ENST00000317840
COL4A1	COL4A1	COL4A1
COL4A1_ENST00000375815	COL4A1_ENST00000375815	COL4A1_ENST00000375815
COL4A2	COL4A2	COL4A2
COL4A3	COL4A3	COL4A3
COL4A3_ENST00000328380	COL4A3_ENST00000328380	COL4A3_ENST00000328380
COL4A3BP	COL4A3BP	COL4A3BP
COL4A3BP_ENST00000380494	COL4A3BP_ENST00000380494	COL4A3BP_ENST00000380494
COL4A4	COL4A4	COL4A4
COL4A5	COL4A5	COL4A5
COL4A5_ENST00000328300	COL4A5_ENST00000328300	COL4A5_ENST00000328300
COL4A6	COL4A6	COL4A6
COL4A6_ENST00000394872	COL4A6_ENST00000394872	COL4A6_ENST00000394872
COL5A1	COL5A1	COL5A1
COL5A3	COL5A3	COL5A3
COL6A1	COL6A1	COL6A1
COL6A2	COL6A2	COL6A2
COL6A2_ENST00000310645	COL6A2_ENST00000310645	COL6A2_ENST00000310645
COL6A2_ENST00000357838	COL6A2_ENST00000357838	COL6A2_ENST00000357838
COL6A3	COL6A3	COL6A3
COL6A5	COL6A5	COL6A5
COL6A6	COL6A6	COL6A6
COL6A6_ENST00000358511	COL6A6_ENST00000358511	COL6A6_ENST00000358511
COL7A1	COL7A1	COL7A1
COL8A1	COL8A1	COL8A1
COL8A2	COL8A2	COL8A2
COL9A1	COL9A1	COL9A1
COL9A1_ENST00000320755	COL9A1_ENST00000320755	COL9A1_ENST00000320755
COL9A1_ENST00000370499	COL9A1_ENST00000370499	COL9A1_ENST00000370499
COL9A2	COL9A2	COL9A2
COL9A3	COL9A3	COL9A3
COLEC10	COLEC10	COLEC10
COLEC12	COLEC12	COLEC12
COMP	COMP	COMP
COPA	COPA	COPA
COPA_ENST00000368069	COPA_ENST00000368069	COPA_ENST00000368069
COPB1	COPB1	COPB1
CORIN	CORIN	CORIN
CORO1B	CORO1B	CORO1B
CORO1C	CORO1C	CORO1C
CORO2A	CORO2A	CORO2A
CORO2B	CORO2B	CORO2B
CORO6	CORO6	CORO6
CORO7	CORO7	CORO7
COX10	COX10	COX10
CP	CP	CP
CPA2	CPA2	CPA2
CPA3	CPA3	CPA3
CPA4	CPA4	CPA4
CPA6
CPAMD8	CPAMD8	CPAMD8
CPB1	CPB1	CPB1
CPD	CPD	CPD
CPE	CPE	CPE
CPEB3	CPEB3	CPEB3
CPEB3_ENST00000394210	CPEB3_ENST00000394210	CPEB3_ENST00000394210
CPEB4	CPEB4	CPEB4
CPED1	CPED1	CPED1
CPN1	CPN1	CPN1
CPNE3	CPNE3	CPNE3
CPNE4	CPNE4	CPNE4
CPNE4_ENST00000512332	CPNE4_ENST00000512332	CPNE4_ENST00000512332
CPNE6	CPNE6	CPNE6
CPNE6_ENST00000537691	CPNE6_ENST00000537691	CPNE6_ENST00000537691
CPNE8	CPNE8	CPNE8
CPNE9	CPNE9	CPNE9
CPS1	CPS1	CPS1
CPS1_ENST00000430249	CPS1_ENST00000430249	CPS1_ENST00000430249
CPSF2	CPSF2	CPSF2
CPSF7
CPT1A	CPT1A	CPT1A
CPT1A_ENST00000376618	CPT1A_ENST00000376618	CPT1A_ENST00000376618
CPT1B	CPT1B	CPT1B
CPT1C	CPT1C	CPT1C
CPVL	CPVL	CPVL
CPXCR1
CPXM1	CPXM1	CPXM1
CPXM2	CPXM2	CPXM2
CPZ	CPZ	CPZ
CR1_ENST00000367049
CR1L	CR1L	CR1L
CR1L_ENST00000508064	CR1L_ENST00000508064	CR1L_ENST00000508064
CRAMP1L	CRAMP1L	CRAMP1L
CRAMP1L_ENST00000436138	CRAMP1L_ENST00000436138	CRAMP1L_ENST00000436138
CRAT	CRAT	CRAT
CRB1	CRB1	CRB1
CRB1_ENST00000535699	CRB1_ENST00000535699	CRB1_ENST00000535699
CRB2	CRB2	CRB2
CRB2_ENST00000359999	CRB2_ENST00000359999	CRB2_ENST00000359999
CREB3L1	CREB3L1	CREB3L1
CREB3L2_ENST00000456390	CREB3L2_ENST00000456390	CREB3L2_ENST00000456390
CREB3L3	CREB3L3	CREB3L3
CREB5	CREB5	CREB5
CREB5_ENST00000396298	CREB5_ENST00000396298	CREB5_ENST00000396298
CRHBP	CRHBP	CRHBP
CRHR1	CRHR1	CRHR1
CRIM1	CRIM1	CRIM1
CRIPAK	CRIPAK	CRIPAK
CRISP3	CRISP3	CRISP3
CRISP3_ENST00000433368	CRISP3_ENST00000433368	CRISP3_ENST00000433368
CRNKL1	CRNKL1	CRNKL1
CRNN	CRNN	CRNN
CROCC	CROCC	CROCC
CRSP3	CRSP3	CRSP3
CRTAM	CRTAM	CRTAM
CRTC2	CRTC2	CRTC2
CRTC3	CRTC3	CRTC3
CRX	CRX	CRX
CRY1	CRY1	CRY1
CRY2	CRY2	CRY2
CRY2_ENST00000443527	CRY2_ENST00000443527	CRY2_ENST00000443527
CRYBB1	CRYBB1	CRYBB1
CTAGE1	CTAGE1	CTAGE1
CTAGE1_ENST00000391403	CTAGE1_ENST00000391403	CTAGE1_ENST00000391403
CTAGE5	CTAGE5	CTAGE5
CTAGE5_ENST00000341502	CTAGE5_ENST00000341502	CTAGE5_ENST00000341502
CTAGE5_ENST00000341749	CTAGE5_ENST00000341749	CTAGE5_ENST00000341749
CTBP1	CTBP1	CTBP1
CTC1	CTC1	CTC1
CTCFL	CTCFL	CTCFL
CTCFL_ENST00000423479	CTCFL_ENST00000423479	CTCFL_ENST00000423479
CTCFL_ENST00000426658	CTCFL_ENST00000426658	CTCFL_ENST00000426658
CTIF	CTIF	CTIF
CTIF_ENST00000420275	CTIF_ENST00000420275	CTIF_ENST00000420275
CTNNA1	CTNNA1	CTNNA1
CTNNA2_ENST00000361291	CTNNA2_ENST00000361291	CTNNA2_ENST00000361291
CTNNA2_ENST00000466387	CTNNA2_ENST00000466387	CTNNA2_ENST00000466387
CTNNA3	CTNNA3	CTNNA3
CTNNA3_ENST00000433211	CTNNA3_ENST00000433211	CTNNA3_ENST00000433211
CTNNA3_ENST00000545309	CTNNA3_ENST00000545309	CTNNA3_ENST00000545309
CTNND2	CTNND2	CTNND2
CTPS2	CTPS2	CTPS2
CTSD	CTSD	CTSD
CTSE	CTSE	CTSE
CTTNBP2	CTTNBP2	CTTNBP2
CTU2_ENST00000453996	CTU2_ENST00000453996	CTU2_ENST00000453996
CUBN	CUBN	CUBN
CUL5	CUL5	CUL5
CUL7	CUL7	CUL7
CUL7_ENST00000535468	CUL7_ENST00000535468	CUL7_ENST00000535468
CUL9	CUL9	CUL9
CUX1_ENST00000292538	CUX1_ENST00000292538	CUX1_ENST00000292538
CUX2	CUX2	CUX2
CUZD1	CUZD1	CUZD1
CWC22	CWC22	CWC22
CWH43	CWH43	CWH43
CXCR4	CXCR4	CXCR4
CXCR4_ENST00000241393	CXCR4_ENST00000241393	CXCR4_ENST00000241393
CXorf22	CXorf22	CXorf22
CXorf23_ENST00000379687	CXorf23_ENST00000379687	CXorf23_ENST00000379687
CXorf36_ENST00000398000	CXorf36_ENST00000398000	CXorf36_ENST00000398000
CXorf57	CXorf57	CXorf57
CXorf59	CXorf59	CXorf59
CXorf66	CXorf66	CXorf66
CXorf67	CXorf67	CXorf67
CXorf67_ENST00000342995	CXorf67_ENST00000342995	CXorf67_ENST00000342995
CYBB
CYLC2	CYLC2	CYLC2
CYP11A1	CYP11A1	CYP11A1
CYP11B1	CYP11B1	CYP11B1
CYP11B2	CYP11B2	CYP11B2
CYP17A1	CYP17A1	CYP17A1
CYP19A1	CYP19A1	CYP19A1
CYP1A1	CYP1A1	CYP1A1
CYP1A2	CYP1A2	CYP1A2
CYP24A1	CYP24A1	CYP24A1
CYP26A1	CYP26A1	CYP26A1
CYP26A1_ENST00000224356	CYP26A1_ENST00000224356	CYP26A1_ENST00000224356
CYP26B1	CYP26B1	CYP26B1
CYP26C1	CYP26C1	CYP26C1
CYP27C1	CYP27C1	CYP27C1
CYP2A13	CYP2A13	CYP2A13
CYP2A6	CYP2A6	CYP2A6
CYP2B6	CYP2B6	CYP2B6
CYP2C18	CYP2C18	CYP2C18
CYP2C19	CYP2C19	CYP2C19
CYP2C8	CYP2C8	CYP2C8
CYP2C8_ENST00000535898	CYP2C8_ENST00000535898	CYP2C8_ENST00000535898
CYP2C8_ENST00000539050	CYP2C8_ENST00000539050	CYP2C8_ENST00000539050
CYP2C9	CYP2C9	CYP2C9
CYP2D6_ENST00000360608	CYP2D6_ENST00000360608	CYP2D6_ENST00000360608
CYP2E1	CYP2E1	CYP2E1
CYP2S1	CYP2S1	CYP2S1
CYP3A4	CYP3A4	CYP3A4
CYP3A5	CYP3A5	CYP3A5
CYP3A5_ENST00000343703	CYP3A5_ENST00000343703	CYP3A5_ENST00000343703
CYP3A7
CYP46A1	CYP46A1	CYP46A1
CYP4A11	CYP4A11	CYP4A11
CYP4A22	CYP4A22	CYP4A22
CYP4F12	CYP4F12	CYP4F12
CYP4F22	CYP4F22	CYP4F22
CYP4F3	CYP4F3	CYP4F3
CYP4F3_ENST00000585846	CYP4F3_ENST00000585846	CYP4F3_ENST00000585846
CYP4X1	CYP4X1	CYP4X1
CYP4Z1	CYP4Z1	CYP4Z1
CYP8B1	CYP8B1	CYP8B1
CYSLTR1	CYSLTR1	CYSLTR1
CYTH3	CYTH3	CYTH3
CYTIP	CYTIP	CYTIP
CS
CSAD	CSAD	CSAD
CSAD_ENST00000267085	CSAD_ENST00000267085	CSAD_ENST00000267085
CSE1L	CSE1L	CSE1L
CSF1	CSF1	CSF1
CSF1_ENST00000329608	CSF1_ENST00000329608	CSF1_ENST00000329608
CSF1R	CSF1R	CSF1R
CSF2RA	CSF2RA	CSF2RA
CSF2RA_ENST00000355432	CSF2RA_ENST00000355432	CSF2RA_ENST00000355432
CSF2RA_ENST00000381509	CSF2RA_ENST00000381509	CSF2RA_ENST00000381509
CSF2RB	CSF2RB	CSF2RB
CSGALNACT1	CSGALNACT1	CSGALNACT1
CSGALNACT2	CSGALNACT2	CSGALNACT2
CSK_ENST00000220003	CSK_ENST00000220003	CSK_ENST00000220003
CSMD1_ENST00000318252	CSMD1_ENST00000318252	CSMD1_ENST00000318252
CSMD1_ENST00000537824	CSMD1_ENST00000537824	CSMD1_ENST00000537824
CSMD1_ENST00000539096	CSMD1_ENST00000539096	CSMD1_ENST00000539096
CSMD2	CSMD2	CSMD2
CSMD2_ENST00000338325	CSMD2_ENST00000338325	CSMD2_ENST00000338325
CSMD2_ENST00000373380	CSMD2_ENST00000373380	CSMD2_ENST00000373380
CSMD2_ENST00000373381	CSMD2_ENST00000373381	CSMD2_ENST00000373381
CSMD2_ENST00000373388	CSMD2_ENST00000373388	CSMD2_ENST00000373388
CSMD3	CSMD3	CSMD3
CSMD3_ENST00000343508	CSMD3_ENST00000343508	CSMD3_ENST00000343508
CSNK1A1L	CSNK1A1L	CSNK1A1L
CSNK1G2	CSNK1G2	CSNK1G2
CSPG4	CSPG4	CSPG4
CSPG5	CSPG5	CSPG5
CSPG5_ENST00000383738	CSPG5_ENST00000383738	CSPG5_ENST00000383738
CSRNP1	CSRNP1	CSRNP1
CSRNP3	CSRNP3	CSRNP3
CSRP2BP	CSRP2BP	CSRP2BP
CSTF1
CSTF2	CSTF2	CSTF2
CSTF2_ENST00000415585	CSTF2_ENST00000415585	CSTF2_ENST00000415585
CSTF2T	CSTF2T	CSTF2T
D2HGDH	D2HGDH	D2HGDH
DAAM1	DAAM1	DAAM1
DAAM2	DAAM2	DAAM2
DAAM2_ENST00000398904	DAAM2_ENST00000398904	DAAM2_ENST00000398904
DAB1	DAB1	DAB1
DAB1_ENST00000371231	DAB1_ENST00000371231	DAB1_ENST00000371231
DAB2	DAB2	DAB2
DAB2IP	DAB2IP	DAB2IP
DAB2IP_ENST00000259371	DAB2IP_ENST00000259371	DAB2IP_ENST00000259371
DACH2	DACH2	DACH2
DACH2_ENST00000373125	DACH2_ENST00000373125	DACH2_ENST00000373125
DACH2_ENST00000373131	DACH2_ENST00000373131	DACH2_ENST00000373131
DACT1	DACT1	DACT1
DACT2_ENST00000366795	DACT2_ENST00000366795	DACT2_ENST00000366795
DAG1	DAG1	DAG1
DAK	DAK	DAK
[truncated: 7,902 more rows]

## Sheet: CG_SOf-CG_SSIf
CG_SSIf_2SD	CG_SOf_2SD	in both lists			Number of transcripts	%
AAAS				CG_SSIf_2SD	1211	75.9703
AASDH				CG_SOf_2SD	1060	86.7925
AASDH_ENST00000502617				in both lists	920
ABCB8_ENST00000356058	ABCB8_ENST00000356058	ABCB8_ENST00000356058
ABCG8	ABCG8	ABCG8
ABLIM1_ENST00000392952
ACBD3
ACCN5
ACKR3	ACKR3	ACKR3
ACRBP	ACRBP	ACRBP
ACTA1	ACTA1	ACTA1
ACTL6B
ACVR1B	ACVR1B	ACVR1B
ACVR1B_ENST00000541224	ACVR1B_ENST00000541224	ACVR1B_ENST00000541224
ACVR2A	ACVR2A	ACVR2A
ADD3
ADNP
ADRA1A_ENST00000358857	ADRA1A_ENST00000358857	ADRA1A_ENST00000358857
ADRA1A_ENST00000380572	ADRA1A_ENST00000380572	ADRA1A_ENST00000380572
ADRA1B	ADRA1B	ADRA1B
AFP	AFP	AFP
AGAP6	AGAP6	AGAP6
AGBL3	AGBL3	AGBL3
AGBL3_ENST00000458078	AGBL3_ENST00000458078	AGBL3_ENST00000458078
AGT
AGTPBP1_ENST00000376109	AGTPBP1_ENST00000376109	AGTPBP1_ENST00000376109
AIM2
AKAP7
AKT1	AKT1	AKT1
ALK	ALK	ALK
ALX4
AMER1	AMER1	AMER1
AMIGO3	AMIGO3	AMIGO3
ANGPTL2	ANGPTL2	ANGPTL2
ANKMY1_ENST00000405523	ANKMY1_ENST00000405523	ANKMY1_ENST00000405523
ANKRD31_ENST00000274361	ANKRD31_ENST00000274361	ANKRD31_ENST00000274361
ANKRD56	ANKRD56	ANKRD56
ANKS3	ANKS3	ANKS3
ANO10
ANTXR2
ANXA10
AP1B1	AP1B1	AP1B1
AP1B1_ENST00000415447	AP1B1_ENST00000415447	AP1B1_ENST00000415447
AP1M1	AP1M1	AP1M1
AP2A2
APC	APC	APC
APPL1
AQP7	AQP7	AQP7
AR_ENST00000396043	AR_ENST00000396043	AR_ENST00000396043
ARFGAP3
ARHGAP11A	ARHGAP11A	ARHGAP11A
ARHGEF16
ARID1A	ARID1A	ARID1A
ARID1B	ARID1B	ARID1B
ARID2	ARID2	ARID2
ARID5A	ARID5A	ARID5A
ARL13B_ENST00000394222
ASMTL	ASMTL	ASMTL
ASMTL_ENST00000381317	ASMTL_ENST00000381317	ASMTL_ENST00000381317
ASTE1
ASXL1	ASXL1	ASXL1
ASXL1_ENST00000306058	ASXL1_ENST00000306058	ASXL1_ENST00000306058
ASXL2	ASXL2	ASXL2
ASXL2_ENST00000435504	ASXL2_ENST00000435504	ASXL2_ENST00000435504
ATAD2
ATG14	ATG14	ATG14
ATM	ATM	ATM
ATM_ENST00000278616	ATM_ENST00000278616	ATM_ENST00000278616
ATP11B
ATP6V1B1
ATR	ATR	ATR
ATRX	ATRX	ATRX
ATRX_ENST00000373344	ATRX_ENST00000373344	ATRX_ENST00000373344
AURKA	AURKA	AURKA
AXIN1	AXIN1	AXIN1
AXIN2
B2M	B2M	B2M
B2M_ENST00000544417	B2M_ENST00000544417	B2M_ENST00000544417
B3GALT1	B3GALT1	B3GALT1
BAIAP2L1
BAP1	BAP1	BAP1
BARD1	BARD1	BARD1
BARD1_ENST00000260947	BARD1_ENST00000260947	BARD1_ENST00000260947
BARHL2	BARHL2	BARHL2
BCL11A_ENST00000356842	BCL11A_ENST00000356842	BCL11A_ENST00000356842
BCL6	BCL6	BCL6
BCL9L
BCL9L_ENST00000392849
BCOR	BCOR	BCOR
BCOR_ENST00000378444	BCOR_ENST00000378444	BCOR_ENST00000378444
BCOR_ENST00000378463	BCOR_ENST00000378463	BCOR_ENST00000378463
BCORL1
BDKRB2	BDKRB2	BDKRB2
BICC1_ENST00000263103	BICC1_ENST00000263103	BICC1_ENST00000263103
BIN1	BIN1	BIN1
BIRC2
BIRC3	BIRC3	BIRC3
BMPR2	BMPR2	BMPR2
BPI	BPI	BPI
BRAF	BRAF	BRAF
BRCA1	BRCA1	BRCA1
BRCA1_ENST00000471181	BRCA1_ENST00000471181	BRCA1_ENST00000471181
BRCA2	BRCA2	BRCA2
BRCA2_ENST00000544455	BRCA2_ENST00000544455	BRCA2_ENST00000544455
BRD7	BRD7	BRD7
BRE
BRE_ENST00000342045
BRIP1	BRIP1	BRIP1
BRIP1_ENST00000259008	BRIP1_ENST00000259008	BRIP1_ENST00000259008
BTBD17	BTBD17	BTBD17
BTBD7_ENST00000298896
BTN3A1	BTN3A1	BTN3A1
C10orf68
C12orf26	C12orf26	C12orf26
C14orf39
C14orf43	C14orf43	C14orf43
C15orf27	C15orf27	C15orf27
C15orf33	C15orf33	C15orf33
C16orf88
C17orf28
C17orf63	C17orf63	C17orf63
C17orf63_ENST00000341217	C17orf63_ENST00000341217	C17orf63_ENST00000341217
C17orf70	C17orf70	C17orf70
C17orf70_ENST00000327787	C17orf70_ENST00000327787	C17orf70_ENST00000327787
C18orf34
C18orf34_ENST00000383096
C1orf114
C22orf28
C2orf67
C7orf72	C7orf72	C7orf72
C8orf45	C8orf45	C8orf45
C9orf131
CACNB1	CACNB1	CACNB1
CACNG2	CACNG2	CACNG2
CALB2	CALB2	CALB2
CaMK1b	CaMK1b	CaMK1b
CAPS2_ENST00000409445	CAPS2_ENST00000409445	CAPS2_ENST00000409445
CASP5_ENST00000393141
CASP8	CASP8	CASP8
CASP8_ENST00000264275	CASP8_ENST00000264275	CASP8_ENST00000264275
CASP8_ENST00000358485	CASP8_ENST00000358485	CASP8_ENST00000358485
CBFB_ENST00000290858	CBFB_ENST00000290858	CBFB_ENST00000290858
CBFB_ENST00000412916	CBFB_ENST00000412916	CBFB_ENST00000412916
CBLN4	CBLN4	CBLN4
CBX6	CBX6	CBX6
CCDC116	CCDC116	CCDC116
CCDC28A
CCDC35	CCDC35	CCDC35
CCDC41	CCDC41	CCDC41
CCDC66	CCDC66	CCDC66
CCDC66_ENST00000394672	CCDC66_ENST00000394672	CCDC66_ENST00000394672
CCDC66_ENST00000436465	CCDC66_ENST00000436465	CCDC66_ENST00000436465
CCDC73
CCDC82	CCDC82	CCDC82
CCND2
CCND3	CCND3	CCND3
CCNE1	CCNE1	CCNE1
CCNJL	CCNJL	CCNJL
CCR4	CCR4	CCR4
CCR7	CCR7	CCR7
CCT3
CCT7_ENST00000258091	CCT7_ENST00000258091	CCT7_ENST00000258091
CD79A
CD79B	CD79B	CD79B
CD93
CDC14A
CDC14A_ENST00000361544
CDC23	CDC23	CDC23
CDC7	CDC7	CDC7
CDC73	CDC73	CDC73
CDCA7L	CDCA7L	CDCA7L
CDCP2	CDCP2	CDCP2
CDH1	CDH1	CDH1
CDH26
CDK12	CDK12	CDK12
CDK8	CDK8	CDK8
CDKAL1	CDKAL1	CDKAL1
CDKN1A	CDKN1A	CDKN1A
CDKN1A_ENST00000448526	CDKN1A_ENST00000448526	CDKN1A_ENST00000448526
CDKN1B	CDKN1B	CDKN1B
CDKN2A	CDKN2A	CDKN2A
CDKN2A_ENST00000446177	CDKN2A_ENST00000446177	CDKN2A_ENST00000446177
CDKN2A_ENST00000498124	CDKN2A_ENST00000498124	CDKN2A_ENST00000498124
CEBPA
CENPC1
CEP135	CEP135	CEP135
CEP290
CEP290_ENST00000309041	CEP290_ENST00000309041	CEP290_ENST00000309041
CEP95	CEP95	CEP95
CEP95_ENST00000556440	CEP95_ENST00000556440	CEP95_ENST00000556440
CERK
CES5A	CES5A	CES5A
CES5A_ENST00000521992	CES5A_ENST00000521992	CES5A_ENST00000521992
CETP	CETP	CETP
CFHR3	CFHR3	CFHR3
CFI	CFI	CFI
CHD1L	CHD1L	CHD1L
CHD1L_ENST00000369258	CHD1L_ENST00000369258	CHD1L_ENST00000369258
CHEK1	CHEK1	CHEK1
CHEK2	CHEK2	CHEK2
CHEK2_ENST00000382580	CHEK2_ENST00000382580	CHEK2_ENST00000382580
CHRM4	CHRM4	CHRM4
CHST12	CHST12	CHST12
CHUK	CHUK	CHUK
CKAP2
CLCN3
CLCN7	CLCN7	CLCN7
CLOCK
CNTN6	CNTN6	CNTN6
COBLL1
COIL
COLQ_ENST00000435459	COLQ_ENST00000435459	COLQ_ENST00000435459
CPA6_ENST00000518549	CPA6_ENST00000518549	CPA6_ENST00000518549
CPEB2
CPEB2_ENST00000538197
CPSF6	CPSF6	CPSF6
CPSF6_ENST00000435070	CPSF6_ENST00000435070	CPSF6_ENST00000435070
CREBBP	CREBBP	CREBBP
CRISPLD2	CRISPLD2	CRISPLD2
CRP	CRP	CRP
CRTC1
CRTC1_ENST00000338797
CTCF	CTCF	CTCF
CTLA4
CTNNB1	CTNNB1	CTNNB1
CTNND1	CTNND1	CTNND1
CTNND1_ENST00000399050	CTNND1_ENST00000399050	CTNND1_ENST00000399050
CTSG	CTSG	CTSG
CUL3	CUL3	CUL3
CWF19L2_ENST00000282251
CX3CR1	CX3CR1	CX3CR1
CX3CR1_ENST00000358309	CX3CR1_ENST00000358309	CX3CR1_ENST00000358309
CXorf30
CXorf30_ENST00000378657
CXXC1	CXXC1	CXXC1
CYLD	CYLD	CYLD
CYLD_ENST00000427738	CYLD_ENST00000427738	CYLD_ENST00000427738
CYP27A1	CYP27A1	CYP27A1
CYP39A1	CYP39A1	CYP39A1
CYP4F11
CSNK2A1	CSNK2A1	CSNK2A1
DAGLB	DAGLB	DAGLB
DAXX	DAXX	DAXX
DAZAP1
DDO	DDO	DDO
DDX17	DDX17	DDX17
DDX17_ENST00000381633	DDX17_ENST00000381633	DDX17_ENST00000381633
DDX26B
DDX26B_ENST00000370752
DDX27
DDX3X	DDX3X	DDX3X
DDX4_ENST00000511853	DDX4_ENST00000511853	DDX4_ENST00000511853
DENND1A_ENST00000373618	DENND1A_ENST00000373618	DENND1A_ENST00000373618
DENND1A_ENST00000373620	DENND1A_ENST00000373620	DENND1A_ENST00000373620
DENND4C	DENND4C	DENND4C
DFNA5	DFNA5	DFNA5
DHCR7	DHCR7	DHCR7
DHCR7_ENST00000355527	DHCR7_ENST00000355527	DHCR7_ENST00000355527
DHRS2_ENST00000344777	DHRS2_ENST00000344777	DHRS2_ENST00000344777
DHX16	DHX16	DHX16
DHX16_ENST00000376437
DHX16_ENST00000376442	DHX16_ENST00000376442	DHX16_ENST00000376442
DICER1	DICER1	DICER1
DIS3	DIS3	DIS3
DLAT
DMRT3	DMRT3	DMRT3
DMRTB1
DNA2
DNAJC11	DNAJC11	DNAJC11
DNAJC2
DNMT3A	DNMT3A	DNMT3A
DOCK3
DOCK3_ENST00000266037
DRD2_ENST00000355319	DRD2_ENST00000355319	DRD2_ENST00000355319
DUSP16	DUSP16	DUSP16
DUX4L1	DUX4L1	DUX4L1
DUX4L2	DUX4L2	DUX4L2
DYNC1I2
DYNC1LI1
DYRK1A	DYRK1A	DYRK1A
DYRK1A_ENST00000338785	DYRK1A_ENST00000338785	DYRK1A_ENST00000338785
EED	EED	EED
EEF1D	EEF1D	EEF1D
EEF1D_ENST00000423316	EEF1D_ENST00000423316	EEF1D_ENST00000423316
EFHA2	EFHA2	EFHA2
EGFR	EGFR	EGFR
EGFR_ENST00000342916	EGFR_ENST00000342916	EGFR_ENST00000342916
EGFR_ENST00000344576	EGFR_ENST00000344576	EGFR_ENST00000344576
EGFR_ENST00000442591	EGFR_ENST00000442591	EGFR_ENST00000442591
EGR4	EGR4	EGR4
EHD3	EHD3	EHD3
EHD4	EHD4	EHD4
EIF1AX	EIF1AX	EIF1AX
EIF2AK1	EIF2AK1	EIF2AK1
EIF2AK1_ENST00000536084	EIF2AK1_ENST00000536084	EIF2AK1_ENST00000536084
EME2	EME2	EME2
EME2_ENST00000307394	EME2_ENST00000307394	EME2_ENST00000307394
ENG	ENG	ENG
ENG_ENST00000373203	ENG_ENST00000373203	ENG_ENST00000373203
ENPP4	ENPP4	ENPP4
ENSG00000174501	ENSG00000174501	ENSG00000174501
ENSG00000198064	ENSG00000198064	ENSG00000198064
ENTPD2	ENTPD2	ENTPD2
EP300	EP300	EP300
EPB41L5
EPB41L5_ENST00000443124
EPHA3_ENST00000452448	EPHA3_ENST00000452448	EPHA3_ENST00000452448
ERBB2	ERBB2	ERBB2
ERBB2_ENST00000541774	ERBB2_ENST00000541774	ERBB2_ENST00000541774
ERBB3	ERBB3	ERBB3
ERBB3_ENST00000267101	ERBB3_ENST00000267101	ERBB3_ENST00000267101
ERBB3_ENST00000411731	ERBB3_ENST00000411731	ERBB3_ENST00000411731
ERBB4	ERBB4	ERBB4
ERBB4_ENST00000402597	ERBB4_ENST00000402597	ERBB4_ENST00000402597
ERCC2_ENST00000391945	ERCC2_ENST00000391945	ERCC2_ENST00000391945
ERCC2_ENST00000485403	ERCC2_ENST00000485403	ERCC2_ENST00000485403
ERLEC1	ERLEC1	ERLEC1
ERRFI1
ESR1	ESR1	ESR1
ESRP1
ESRP1_ENST00000433389
ETV1	ETV1	ETV1
ETV4_ENST00000319349	ETV4_ENST00000319349	ETV4_ENST00000319349
ETV6	ETV6	ETV6
EXOC1	EXOC1	EXOC1
EXOSC9
EXT1	EXT1	EXT1
EZH2	EZH2	EZH2
EZH2_ENST00000350995	EZH2_ENST00000350995	EZH2_ENST00000350995
FAM108A1	FAM108A1	FAM108A1
FAM123B_ENST00000330258	FAM123B_ENST00000330258	FAM123B_ENST00000330258
FAM39B	FAM39B	FAM39B
FAM55A	FAM55A	FAM55A
FAM82A1
FAR2
FAS	FAS	FAS
FAT	FAT	FAT
FAT1	FAT1	FAT1
FBRS_ENST00000356166	FBRS_ENST00000356166	FBRS_ENST00000356166
FBXO11	FBXO11	FBXO11
FBXO11_ENST00000403359
FBXO7_ENST00000266087	FBXO7_ENST00000266087	FBXO7_ENST00000266087
FBXO7_ENST00000382058	FBXO7_ENST00000382058	FBXO7_ENST00000382058
FBXW2_ENST00000373926	FBXW2_ENST00000373926	FBXW2_ENST00000373926
FBXW7	FBXW7	FBXW7
FBXW7_ENST00000281708	FBXW7_ENST00000281708	FBXW7_ENST00000281708
FBXW7_ENST00000296555	FBXW7_ENST00000296555	FBXW7_ENST00000296555
FBXW7_ENST00000393956	FBXW7_ENST00000393956	FBXW7_ENST00000393956
FBXW7_ENST00000534231	FBXW7_ENST00000534231	FBXW7_ENST00000534231
FBXW7_NM_018315_2	FBXW7_NM_018315_2	FBXW7_NM_018315_2
FCHO2
FCN2	FCN2	FCN2
FEM1A	FEM1A	FEM1A
FETUB
FGF14_ENST00000376143
FGF3	FGF3	FGF3
FGFR2	FGFR2	FGFR2
FGFR2_ENST00000351936	FGFR2_ENST00000351936	FGFR2_ENST00000351936
FGFR2_ENST00000357555	FGFR2_ENST00000357555	FGFR2_ENST00000357555
FGFR2_ENST00000369056	FGFR2_ENST00000369056	FGFR2_ENST00000369056
FGFR2_ENST00000457416	FGFR2_ENST00000457416	FGFR2_ENST00000457416
FGFR3	FGFR3	FGFR3
FGFR3_ENST00000340107	FGFR3_ENST00000340107	FGFR3_ENST00000340107
FH	FH	FH
FLT3	FLT3	FLT3
FOXA1	FOXA1	FOXA1
FOXD4	FOXD4	FOXD4
FOXG1	FOXG1	FOXG1
FOXI1	FOXI1	FOXI1
FOXL2	FOXL2	FOXL2
FOXP2	FOXP2	FOXP2
FOXP2_ENST00000393500	FOXP2_ENST00000393500	FOXP2_ENST00000393500
FOXP2_ENST00000403559	FOXP2_ENST00000403559	FOXP2_ENST00000403559
FRYL_ENST00000537810
FUBP1_ENST00000370767	FUBP1_ENST00000370767	FUBP1_ENST00000370767
FUBP1_ENST00000370768	FUBP1_ENST00000370768	FUBP1_ENST00000370768
FUBP1_ENST00000436586	FUBP1_ENST00000436586	FUBP1_ENST00000436586
FUBP3
FUS	FUS	FUS
FUS_ENST00000254108	FUS_ENST00000254108	FUS_ENST00000254108
FUT1	FUT1	FUT1
FXR1
FXR2
FZD2	FZD2	FZD2
G2E3	G2E3	G2E3
G3BP2	G3BP2	G3BP2
GAA	GAA	GAA
GABRD	GABRD	GABRD
GALNTL5	GALNTL5	GALNTL5
GAS6_ENST00000355761
GATA1_ENST00000376665	GATA1_ENST00000376665	GATA1_ENST00000376665
GATA2	GATA2	GATA2
GCK_ENST00000395796	GCK_ENST00000395796	GCK_ENST00000395796
GFPT2	GFPT2	GFPT2
GIGYF2	GIGYF2	GIGYF2
GIGYF2_ENST00000409451	GIGYF2_ENST00000409451	GIGYF2_ENST00000409451
GIGYF2_ENST00000452341	GIGYF2_ENST00000452341	GIGYF2_ENST00000452341
GJA3	GJA3	GJA3
GJA8	GJA8	GJA8
GJB4	GJB4	GJB4
GLTSCR1
GNA11	GNA11	GNA11
GNAQ	GNAQ	GNAQ
GNAS	GNAS	GNAS
GNAS_ENST00000371100	GNAS_ENST00000371100	GNAS_ENST00000371100
GNE	GNE	GNE
GNE_ENST00000396594	GNE_ENST00000396594	GNE_ENST00000396594
GP1BA	GP1BA	GP1BA
GP5	GP5	GP5
GP5_ENST00000323007	GP5_ENST00000323007	GP5_ENST00000323007
GPR108	GPR108	GPR108
GPR152	GPR152	GPR152
GPR26	GPR26	GPR26
GPR31	GPR31	GPR31
GPR77	GPR77	GPR77
GPSM2	GPSM2	GPSM2
GRB14
GRK4_ENST00000398052
GRLF1	GRLF1	GRLF1
GRLF1_ENST00000317082	GRLF1_ENST00000317082	GRLF1_ENST00000317082
GRM6	GRM6	GRM6
GRPR	GRPR	GRPR
GSDMB	GSDMB	GSDMB
GSDMB_ENST00000418519	GSDMB_ENST00000418519	GSDMB_ENST00000418519
GSK3B_ENST00000316626	GSK3B_ENST00000316626	GSK3B_ENST00000316626
GTF2E1	GTF2E1	GTF2E1
GTPBP5	GTPBP5	GTPBP5
GUF1
H3F3A	H3F3A	H3F3A
HAPLN4	HAPLN4	HAPLN4
HCRTR1	HCRTR1	HCRTR1
HELLS
HIAT1
HIC1_ENST00000322941
HIST1H3B	HIST1H3B	HIST1H3B
HKR1_ENST00000392153	HKR1_ENST00000392153	HKR1_ENST00000392153
HLA-A	HLA-A	HLA-A
HLA-A_ENST00000376806	HLA-A_ENST00000376806	HLA-A_ENST00000376806
HLA-B	HLA-B	HLA-B
HMGXB4
HMMR
HNF1A
HNF1A_ENST00000543427	HNF1A_ENST00000543427	HNF1A_ENST00000543427
HNRNPA2B1	HNRNPA2B1	HNRNPA2B1
HNRNPA2B1_ENST00000354667	HNRNPA2B1_ENST00000354667	HNRNPA2B1_ENST00000354667
HNRNPK	HNRNPK	HNRNPK
HNRNPL
HNRNPR	HNRNPR	HNRNPR
HNRPL
HNRPR	HNRPR	HNRPR
HOMEZ
HOXA11	HOXA11	HOXA11
HOXB3	HOXB3	HOXB3
HOXD10	HOXD10	HOXD10
HOXD12
HOXD3	HOXD3	HOXD3
HPS6
HRAS	HRAS	HRAS
HRAS_ENST00000397594	HRAS_ENST00000397594	HRAS_ENST00000397594
HS3ST3A1	HS3ST3A1	HS3ST3A1
HSD3B1	HSD3B1	HSD3B1
HSPA2	HSPA2	HSPA2
HTR1F
ICA1
IDH1	IDH1	IDH1
IDH2	IDH2	IDH2
IDH3B	IDH3B	IDH3B
IFT57	IFT57	IFT57
IGF1_ENST00000307046	IGF1_ENST00000307046	IGF1_ENST00000307046
IGSF21	IGSF21	IGSF21
IL12RB1	IL12RB1	IL12RB1
IL12RB1_ENST00000430026	IL12RB1_ENST00000430026	IL12RB1_ENST00000430026
IL12RB1_ENST00000593993	IL12RB1_ENST00000593993	IL12RB1_ENST00000593993
IL2RG
IL2RG_ENST00000374202
IMP5	IMP5	IMP5
ING1	ING1	ING1
ING1_ENST00000338450	ING1_ENST00000338450	ING1_ENST00000338450
IRF2BPL	IRF2BPL	IRF2BPL
IRF3	IRF3	IRF3
IRF4_ENST00000380956
IRGQ	IRGQ	IRGQ
IRS2	IRS2	IRS2
ITGA11	ITGA11	ITGA11
ITGBL1	ITGBL1	ITGBL1
ITPRIP	ITPRIP	ITPRIP
IWS1	IWS1	IWS1
JAK1	JAK1	JAK1
JAK2	JAK2	JAK2
JAK3_ENST00000534444	JAK3_ENST00000534444	JAK3_ENST00000534444
JPH4
KAT8
KBTBD4
KCNC1	KCNC1	KCNC1
KCNC1_ENST00000265969	KCNC1_ENST00000265969	KCNC1_ENST00000265969
KCNG1_ENST00000396017	KCNG1_ENST00000396017	KCNG1_ENST00000396017
KCNG4	KCNG4	KCNG4
KCNJ11	KCNJ11	KCNJ11
KCNJ5	KCNJ5	KCNJ5
KCNK1	KCNK1	KCNK1
KCNK3	KCNK3	KCNK3
KCNN2	KCNN2	KCNN2
KCNN2_ENST00000512097	KCNN2_ENST00000512097	KCNN2_ENST00000512097
KCNN4	KCNN4	KCNN4
KCNQ1	KCNQ1	KCNQ1
KCNQ1_ENST00000335475	KCNQ1_ENST00000335475	KCNQ1_ENST00000335475
KCTD3	KCTD3	KCTD3
KDM5A	KDM5A	KDM5A
KDM5A_ENST00000399788	KDM5A_ENST00000399788	KDM5A_ENST00000399788
KDM5C	KDM5C	KDM5C
KDM5C_ENST00000452825	KDM5C_ENST00000452825	KDM5C_ENST00000452825
KDM6A	KDM6A	KDM6A
KDM6A_ENST00000377967	KDM6A_ENST00000377967	KDM6A_ENST00000377967
KDM6A_ENST00000382899	KDM6A_ENST00000382899	KDM6A_ENST00000382899
KEAP1	KEAP1	KEAP1
KIAA1267	KIAA1267	KIAA1267
KIAA1586
KIAA1731_ENST00000411936	KIAA1731_ENST00000411936	KIAA1731_ENST00000411936
KIT	KIT	KIT
KLF3
KLF4	KLF4	KLF4
KLHDC5
KLHDC8A	KLHDC8A	KLHDC8A
KLHL14_ENST00000358095	KLHL14_ENST00000358095	KLHL14_ENST00000358095
KLHL23	KLHL23	KLHL23
KLHL5	KLHL5	KLHL5
KLHL5_ENST00000359687	KLHL5_ENST00000359687	KLHL5_ENST00000359687
KLHL5_ENST00000381930	KLHL5_ENST00000381930	KLHL5_ENST00000381930
KLHL7	KLHL7	KLHL7
KLK15	KLK15	KLK15
KMO	KMO	KMO
KMT2C	KMT2C	KMT2C
KMT2D	KMT2D	KMT2D
KPNA5	KPNA5	KPNA5
KRAS	KRAS	KRAS
KRAS_ENST00000256078	KRAS_ENST00000256078	KRAS_ENST00000256078
KRT15	KRT15	KRT15
KRT82	KRT82	KRT82
KRT85	KRT85	KRT85
KRTAP5-4	KRTAP5-4	KRTAP5-4
LARGE_ENST00000452586	LARGE_ENST00000452586	LARGE_ENST00000452586
LARP4B
LARP7
LATS1_ENST00000253339	LATS1_ENST00000253339	LATS1_ENST00000253339
LATS1_ENST00000392273	LATS1_ENST00000392273	LATS1_ENST00000392273
LATS1_ENST00000543571	LATS1_ENST00000543571	LATS1_ENST00000543571
LCOR	LCOR	LCOR
LGR6_ENST00000439764	LGR6_ENST00000439764	LGR6_ENST00000439764
LHFPL3	LHFPL3	LHFPL3
LHFPL3_ENST00000543266	LHFPL3_ENST00000543266	LHFPL3_ENST00000543266
LHFPL5	LHFPL5	LHFPL5
LINC00273	LINC00273	LINC00273
LINC00273_ENST00000539813	LINC00273_ENST00000539813	LINC00273_ENST00000539813
LMAN1	LMAN1	LMAN1
LMX1B	LMX1B	LMX1B
LMX1B_ENST00000355497	LMX1B_ENST00000355497	LMX1B_ENST00000355497
LMX1B_ENST00000373474	LMX1B_ENST00000373474	LMX1B_ENST00000373474
LRRC14B
LRRC33	LRRC33	LRRC33
LRRC52	LRRC52	LRRC52
LRRC8A	LRRC8A	LRRC8A
LRRD1	LRRD1	LRRD1
LRRTM2	LRRTM2	LRRTM2
LUC7L2	LUC7L2	LUC7L2
LUC7L2_ENST00000263545	LUC7L2_ENST00000263545	LUC7L2_ENST00000263545
LUC7L2_ENST00000541170	LUC7L2_ENST00000541170	LUC7L2_ENST00000541170
LUM
LUZP4	LUZP4	LUZP4
MAN1A2	MAN1A2	MAN1A2
MANEA	MANEA	MANEA
MAP2K1	MAP2K1	MAP2K1
MAP2K4	MAP2K4	MAP2K4
MAP3K1_ENST00000399503	MAP3K1_ENST00000399503	MAP3K1_ENST00000399503
MAP4_ENST00000395734
MAP7D1
MAPK1	MAPK1	MAPK1
MAPK13	MAPK13	MAPK13
MAPK9_ENST00000452135	MAPK9_ENST00000452135	MAPK9_ENST00000452135
MARCH7	MARCH7	MARCH7
MATR3	MATR3	MATR3
MAX	MAX	MAX
MAX_ENST00000284165	MAX_ENST00000284165	MAX_ENST00000284165
MAX_ENST00000556979	MAX_ENST00000556979	MAX_ENST00000556979
MBD6
MCHR2
MCHR2_ENST00000369212	MCHR2_ENST00000369212	MCHR2_ENST00000369212
MCMDC2	MCMDC2	MCMDC2
MCMDC2_ENST00000313616	MCMDC2_ENST00000313616	MCMDC2_ENST00000313616
MCMDC2_ENST00000422365	MCMDC2_ENST00000422365	MCMDC2_ENST00000422365
MCPH1_ENST00000344683
MDM2	MDM2	MDM2
MDM2_ENST00000462284	MDM2_ENST00000462284	MDM2_ENST00000462284
MDM4	MDM4	MDM4
MED12	MED12	MED12
MED12_ENST00000333646	MED12_ENST00000333646	MED12_ENST00000333646
MED12_ENST00000374080	MED12_ENST00000374080	MED12_ENST00000374080
MEN1	MEN1	MEN1
MESP2	MESP2	MESP2
MFAP3L	MFAP3L	MFAP3L
MFRP
MGA	MGA	MGA
MGAT4C_ENST00000393205	MGAT4C_ENST00000393205	MGAT4C_ENST00000393205
MIS18BP1
MLH1	MLH1	MLH1
MLL2_ENST00000301067	MLL2_ENST00000301067	MLL2_ENST00000301067
MLL3_ENST00000355193	MLL3_ENST00000355193	MLL3_ENST00000355193
MLL4	MLL4	MLL4
MLLT3	MLLT3	MLLT3
MMP13	MMP13	MMP13
MMP14	MMP14	MMP14
MOS
MPL	MPL	MPL
MRE11A
MRE11A_ENST00000323929
MRGPRX1	MRGPRX1	MRGPRX1
MSH2	MSH2	MSH2
MSH3
MSH3_ENST00000265081
MSH6	MSH6	MSH6
MSL2	MSL2	MSL2
MSL3_ENST00000398527
MSN	MSN	MSN
MTF2	MTF2	MTF2
MTMR2	MTMR2	MTMR2
MTMR2_ENST00000346299	MTMR2_ENST00000346299	MTMR2_ENST00000346299
MTNR1A	MTNR1A	MTNR1A
MTOR	MTOR	MTOR
MVK
MXRA8
MYADM	MYADM	MYADM
MYC	MYC	MYC
MYC_ENST00000377970	MYC_ENST00000377970	MYC_ENST00000377970
MYCL1_ENST00000397332	MYCL1_ENST00000397332	MYCL1_ENST00000397332
MYCN	MYCN	MYCN
MYD88	MYD88	MYD88
MYD88_ENST00000417037	MYD88_ENST00000417037	MYD88_ENST00000417037
N4BP2L2	N4BP2L2	N4BP2L2
NAA15	NAA15	NAA15
NAA35	NAA35	NAA35
NARFL	NARFL	NARFL
NBN	NBN	NBN
NCK2	NCK2	NCK2
NCK2_ENST00000233154	NCK2_ENST00000233154	NCK2_ENST00000233154
NCOR1	NCOR1	NCOR1
NCOR1_ENST00000395851	NCOR1_ENST00000395851	NCOR1_ENST00000395851
NCOR1_ENST00000436828	NCOR1_ENST00000436828	NCOR1_ENST00000436828
NDUFS1	NDUFS1	NDUFS1
NEK1_ENST00000507142
NEUROD6	NEUROD6	NEUROD6
NF1	NF1	NF1
NF1_ENST00000358273	NF1_ENST00000358273	NF1_ENST00000358273
NF1_ENST00000444181	NF1_ENST00000444181	NF1_ENST00000444181
NF2	NF2	NF2
NF2_ENST00000403999	NF2_ENST00000403999	NF2_ENST00000403999
NFE2L1	NFE2L1	NFE2L1
NFE2L2	NFE2L2	NFE2L2
NGFR	NGFR	NGFR
NIPBL
NMT2
NMUR2	NMUR2	NMUR2
NONO	NONO	NONO
NOSTRIN_ENST00000444448
NOTCH1	NOTCH1	NOTCH1
NOTCH1_ENST00000277541	NOTCH1_ENST00000277541	NOTCH1_ENST00000277541
NOTCH2	NOTCH2	NOTCH2
NOTCH4	NOTCH4	NOTCH4
NOVA1	NOVA1	NOVA1
NOX5_ENST00000388866
NPEPPS	NPEPPS	NPEPPS
NPTX2	NPTX2	NPTX2
NRAS	NRAS	NRAS
NSUN6	NSUN6	NSUN6
NT5C2	NT5C2	NT5C2
NTNG2	NTNG2	NTNG2
NTNG2_ENST00000360670	NTNG2_ENST00000360670	NTNG2_ENST00000360670
NTNG2_ENST00000372179	NTNG2_ENST00000372179	NTNG2_ENST00000372179
NTRK2	NTRK2	NTRK2
NTRK2_ENST00000304053	NTRK2_ENST00000304053	NTRK2_ENST00000304053
NTRK2_ENST00000376214	NTRK2_ENST00000376214	NTRK2_ENST00000376214
NTRK2_ENST00000395882	NTRK2_ENST00000395882	NTRK2_ENST00000395882
NUB1
NXN	NXN	NXN
NXPE1	NXPE1	NXPE1
ODF2L_ENST00000294678
ODF2L_ENST00000359242
OFD1	OFD1	OFD1
OGT	OGT	OGT
OGT_ENST00000373719	OGT_ENST00000373719	OGT_ENST00000373719
OLAH
OPRL1	OPRL1	OPRL1
OPRM1_ENST00000414028	OPRM1_ENST00000414028	OPRM1_ENST00000414028
OPTN
OR10G7	OR10G7	OR10G7
OR10G8	OR10G8	OR10G8
OR10H1	OR10H1	OR10H1
OR10H2	OR10H2	OR10H2
OR10P1
OR10Z1
OR11G2	OR11G2	OR11G2
OR1C1	OR1C1	OR1C1
OR1F1	OR1F1	OR1F1
OR1G1	OR1G1	OR1G1
OR2A12	OR2A12	OR2A12
OR2A2	OR2A2	OR2A2
OR2A5	OR2A5	OR2A5
OR2B11	OR2B11	OR2B11
OR2C1	OR2C1	OR2C1
OR2J2
OR2L1P	OR2L1P	OR2L1P
OR2T34	OR2T34	OR2T34
OR2Y1
OR3A4	OR3A4	OR3A4
OR4C3	OR4C3	OR4C3
OR4D1	OR4D1	OR4D1
OR4X2	OR4X2	OR4X2
OR52N5
OR5AK2	OR5AK2	OR5AK2
OR6C65	OR6C65	OR6C65
OR6C75
OR6M1	OR6M1	OR6M1
OR7C1
OR7C2
OR8B12	OR8B12	OR8B12
OR9A4	OR9A4	OR9A4
OTX1	OTX1	OTX1
OTX2	OTX2	OTX2
OXSM
PACSIN2	PACSIN2	PACSIN2
PAOX_ENST00000357296	PAOX_ENST00000357296	PAOX_ENST00000357296
PARN	PARN	PARN
PARN_ENST00000437198	PARN_ENST00000437198	PARN_ENST00000437198
PAX2_ENST00000428433
PAX6
PBRM1	PBRM1	PBRM1
PBRM1_ENST00000296302	PBRM1_ENST00000296302	PBRM1_ENST00000296302
PBRM1_ENST00000356770	PBRM1_ENST00000356770	PBRM1_ENST00000356770
PCDHA11	PCDHA11	PCDHA11
PCDHA9	PCDHA9	PCDHA9
PCDHA9_ENST00000532602	PCDHA9_ENST00000532602	PCDHA9_ENST00000532602
PCDHB18	PCDHB18	PCDHB18
PCDHGA12	PCDHGA12	PCDHGA12
PCDHGA12_ENST00000252085	PCDHGA12_ENST00000252085	PCDHGA12_ENST00000252085
PCDHGA3	PCDHGA3	PCDHGA3
PCDHGA3_ENST00000253812	PCDHGA3_ENST00000253812	PCDHGA3_ENST00000253812
PCDHGB1	PCDHGB1	PCDHGB1
PCDHGB1_ENST00000523390	PCDHGB1_ENST00000523390	PCDHGB1_ENST00000523390
PDCD1
PDS5A	PDS5A	PDS5A
PDS5B	PDS5B	PDS5B
PGC	PGC	PGC
PHACTR2	PHACTR2	PHACTR2
PHACTR4
PHF2
PHF6	PHF6	PHF6
PHF6_ENST00000332070	PHF6_ENST00000332070	PHF6_ENST00000332070
PHTF1
PIAS2	PIAS2	PIAS2
PIAS2_ENST00000324794	PIAS2_ENST00000324794	PIAS2_ENST00000324794
PIGB
PIGT
PIK3C2G	PIK3C2G	PIK3C2G
PIK3C2G_ENST00000433979	PIK3C2G_ENST00000433979	PIK3C2G_ENST00000433979
PIK3C2G_ENST00000538779	PIK3C2G_ENST00000538779	PIK3C2G_ENST00000538779
PIK3CA	PIK3CA	PIK3CA
PIK3CA_ENST00000263967	PIK3CA_ENST00000263967	PIK3CA_ENST00000263967
PIK3CB	PIK3CB	PIK3CB
PIK3R1	PIK3R1	PIK3R1
PIK3R1_ENST00000320694	PIK3R1_ENST00000320694	PIK3R1_ENST00000320694
PIK3R1_ENST00000336483	PIK3R1_ENST00000336483	PIK3R1_ENST00000336483
PIK3R3	PIK3R3	PIK3R3
PIK3R3_ENST00000540385	PIK3R3_ENST00000540385	PIK3R3_ENST00000540385
PIP5K1C_ENST00000537021
PITRM1_ENST00000451104	PITRM1_ENST00000451104	PITRM1_ENST00000451104
PKN2	PKN2	PKN2
PLBD2	PLBD2	PLBD2
PLCG1	PLCG1	PLCG1
PLEKHA6
PLEKHS1	PLEKHS1	PLEKHS1
PLK2	PLK2	PLK2
PLUNC	PLUNC	PLUNC
PMS1	PMS1	PMS1
PNCK_ENST00000370145	PNCK_ENST00000370145	PNCK_ENST00000370145
PNCK_ENST00000393831	PNCK_ENST00000393831	PNCK_ENST00000393831
PNCK_ENST00000447676	PNCK_ENST00000447676	PNCK_ENST00000447676
PNISR	PNISR	PNISR
PNKP	PNKP	PNKP
PNKP_ENST00000322344	PNKP_ENST00000322344	PNKP_ENST00000322344
PNMAL2_ENST00000599531	PNMAL2_ENST00000599531	PNMAL2_ENST00000599531
POLE
POLG2	POLG2	POLG2
POLM
POT1	POT1	POT1
POT1_ENST00000357628	POT1_ENST00000357628	POT1_ENST00000357628
POTEM
POTEM_ENST00000551509	POTEM_ENST00000551509	POTEM_ENST00000551509
PPHLN1_ENST00000432191	PPHLN1_ENST00000432191	PPHLN1_ENST00000432191
PPIG
PPM1D	PPM1D	PPM1D
PPP2R1A	PPP2R1A	PPP2R1A
PPP2R3B	PPP2R3B	PPP2R3B
PPP2R3B_ENST00000390665	PPP2R3B_ENST00000390665	PPP2R3B_ENST00000390665
PPP2R5D
PPP6C	PPP6C	PPP6C
PPP6C_ENST00000451402	PPP6C_ENST00000451402	PPP6C_ENST00000451402
PRAM1
PRAMEF2	PRAMEF2	PRAMEF2
PRB3	PRB3	PRB3
PRB3_ENST00000538488	PRB3_ENST00000538488	PRB3_ENST00000538488
PREPL	PREPL	PREPL
PRF1	PRF1	PRF1
PRKACG	PRKACG	PRKACG
PRKAR1B	PRKAR1B	PRKAR1B
PRKCI	PRKCI	PRKCI
PRLHR	PRLHR	PRLHR
PRMT3
PRR5	PRR5	PRR5
PRR5_ENST00000403581	PRR5_ENST00000403581	PRR5_ENST00000403581
PRR5-ARHGAP8	PRR5-ARHGAP8	PRR5-ARHGAP8
PRRT2
PRSS38	PRSS38	PRSS38
PSAPL1_ENST00000319098	PSAPL1_ENST00000319098	PSAPL1_ENST00000319098
PSEN2	PSEN2	PSEN2
PSIP1_ENST00000380733	PSIP1_ENST00000380733	PSIP1_ENST00000380733
PSPC1	PSPC1	PSPC1
PTCH1	PTCH1	PTCH1
PTCH1_ENST00000331920
PTCH1_ENST00000375274
PTCH1_ENST00000430669
PTEN	PTEN	PTEN
PTPN11	PTPN11	PTPN11
PTPN2	PTPN2	PTPN2
PTPRS_ENST00000262963	PTPRS_ENST00000262963	PTPRS_ENST00000262963
PTPRU_ENST00000323874	PTPRU_ENST00000323874	PTPRU_ENST00000323874
PUS7
Q99543-2
QKI
QKI_ENST00000275262
QKI_ENST00000392127
QKI_ENST00000453779
RAB11FIP5
RAC1	RAC1	RAC1
RAC1_ENST00000356142	RAC1_ENST00000356142	RAC1_ENST00000356142
RAD21	RAD21	RAD21
RAD50	RAD50	RAD50
RAD50_ENST00000265335	RAD50_ENST00000265335	RAD50_ENST00000265335
RAD51B_ENST00000487270	RAD51B_ENST00000487270	RAD51B_ENST00000487270
RAD54B	RAD54B	RAD54B
RAF1	RAF1	RAF1
RAF1_ENST00000442415	RAF1_ENST00000442415	RAF1_ENST00000442415
RAPGEF6_ENST00000307984
RAPGEF6_ENST00000509018
RARA	RARA	RARA
RARA_ENST00000394081	RARA_ENST00000394081	RARA_ENST00000394081
RASA1	RASA1	RASA1
RASA1_ENST00000456692	RASA1_ENST00000456692	RASA1_ENST00000456692
RB1	RB1	RB1
RB1_ENST00000267163	RB1_ENST00000267163	RB1_ENST00000267163
RBBP5	RBBP5	RBBP5
RBM10	RBM10	RBM10
RBM25	RBM25	RBM25
RBM27
RBM4	RBM4	RBM4
RBM45	RBM45	RBM45
RBM46	RBM46	RBM46
RBM6
RBPJ	RBPJ	RBPJ
RBPJ_ENST00000348160	RBPJ_ENST00000348160	RBPJ_ENST00000348160
RCOR3
RDBP
RECQL4	RECQL4	RECQL4
REL	REL	REL
RET	RET	RET
RFX5
RGR	RGR	RGR
RHOA	RHOA	RHOA
RICTOR_ENST00000296782	RICTOR_ENST00000296782	RICTOR_ENST00000296782
RINT1
RIOK2	RIOK2	RIOK2
RIT1	RIT1	RIT1
RNF103
RNF111	RNF111	RNF111
RNF111_ENST00000434298	RNF111_ENST00000434298	RNF111_ENST00000434298
RNF128_ENST00000324342
RNF43	RNF43	RNF43
RNF6	RNF6	RNF6
ROCK2
RP11-368J21.2
RP11-368J21.2_ENST00000424340	RP11-368J21.2_ENST00000424340	RP11-368J21.2_ENST00000424340
RP3-402G11_5	RP3-402G11_5	RP3-402G11_5
RPL22
RPN2	RPN2	RPN2
RPS6KL1	RPS6KL1	RPS6KL1
RSF1	RSF1	RSF1
RSL1D1	RSL1D1	RSL1D1
RTDR1	RTDR1	RTDR1
RTKN2
RTKN2_ENST00000395265	RTKN2_ENST00000395265	RTKN2_ENST00000395265
RTN4_ENST00000337526
RTN4RL1	RTN4RL1	RTN4RL1
RUFY2
RUNX1	RUNX1	RUNX1
RUNX1_ENST00000325074	RUNX1_ENST00000325074	RUNX1_ENST00000325074
RUNX1_ENST00000344691	RUNX1_ENST00000344691	RUNX1_ENST00000344691
RUNX1_ENST00000486278	RUNX1_ENST00000486278	RUNX1_ENST00000486278
RUNX2	RUNX2	RUNX2
RUNX2_ENST00000352853	RUNX2_ENST00000352853	RUNX2_ENST00000352853
S1PR3	S1PR3	S1PR3
SAFB2
SAG	SAG	SAG
SAG_ENST00000409110	SAG_ENST00000409110	SAG_ENST00000409110
SAMSN1_ENST00000285670	SAMSN1_ENST00000285670	SAMSN1_ENST00000285670
SARDH_ENST00000371868	SARDH_ENST00000371868	SARDH_ENST00000371868
SASS6	SASS6	SASS6
SBK1_ENST00000341901	SBK1_ENST00000341901	SBK1_ENST00000341901
SBNO1
SCAF4	SCAF4	SCAF4
SCLT1
SCLT1_ENST00000281142
SEC14L4	SEC14L4	SEC14L4
SEC31A_ENST00000395310
SEC31A_ENST00000432794
SEC63
SENP1_ENST00000448372
SENP6	SENP6	SENP6
SENP6_ENST00000370014	SENP6_ENST00000370014	SENP6_ENST00000370014
SENP6_ENST00000447266	SENP6_ENST00000447266	SENP6_ENST00000447266
SERPINA4	SERPINA4	SERPINA4
SERPINA5	SERPINA5	SERPINA5
SERPINB10
SETD2	SETD2	SETD2
SETD2_ENST00000409792	SETD2_ENST00000409792	SETD2_ENST00000409792
SF3B1	SF3B1	SF3B1
SGIP1_ENST00000371039	SGIP1_ENST00000371039	SGIP1_ENST00000371039
SH3BP2
SHQ1	SHQ1	SHQ1
SIN3A	SIN3A	SIN3A
SKOR2	SKOR2	SKOR2
SLAIN1
SLC12A7	SLC12A7	SLC12A7
SLC13A3_ENST00000372121	SLC13A3_ENST00000372121	SLC13A3_ENST00000372121
SLC14A1
SLC14A1_ENST00000436407	SLC14A1_ENST00000436407	SLC14A1_ENST00000436407
SLC16A1
SLC16A12
SLC16A12_ENST00000371790	SLC16A12_ENST00000371790	SLC16A12_ENST00000371790
SLC16A3	SLC16A3	SLC16A3
SLC17A2
SLC18A3	SLC18A3	SLC18A3
SLC1A7	SLC1A7	SLC1A7
SLC20A2	SLC20A2	SLC20A2
SLC22A11	SLC22A11	SLC22A11
SLC22A4
SLC22A9
SLC23A2
SLC25A6	SLC25A6	SLC25A6
SLC26A6	SLC26A6	SLC26A6
SLC26A6_ENST00000383733	SLC26A6_ENST00000383733	SLC26A6_ENST00000383733
SLC27A3
SLC28A1_ENST00000537624	SLC28A1_ENST00000537624	SLC28A1_ENST00000537624
SLC2A1	SLC2A1	SLC2A1
SLC2A8	SLC2A8	SLC2A8
SLC34A2	SLC34A2	SLC34A2
SLC35F3
SLC35F5
SLC3A2
SLC41A1	SLC41A1	SLC41A1
SLC44A3_ENST00000271227
SLC45A1	SLC45A1	SLC45A1
SLC45A1_ENST00000377479	SLC45A1_ENST00000377479	SLC45A1_ENST00000377479
SLC45A4	SLC45A4	SLC45A4
SLC46A2	SLC46A2	SLC46A2
SLC47A1	SLC47A1	SLC47A1
SLC5A2	SLC5A2	SLC5A2
SLC6A18	SLC6A18	SLC6A18
SLC6A20	SLC6A20	SLC6A20
SLC6A20_ENST00000358525	SLC6A20_ENST00000358525	SLC6A20_ENST00000358525
SLC7A10	SLC7A10	SLC7A10
SLC9A3	SLC9A3	SLC9A3
SLCO4A1	SLCO4A1	SLCO4A1
SLFN12
SLITRK6
SMAD2	SMAD2	SMAD2
SMAD2_ENST00000591214	SMAD2_ENST00000591214	SMAD2_ENST00000591214
SMAD3	SMAD3	SMAD3
SMAD4	SMAD4	SMAD4
SMAD4_ENST00000452201	SMAD4_ENST00000452201	SMAD4_ENST00000452201
SMAP1
SMARCA4	SMARCA4	SMARCA4
SMARCA4_ENST00000358026	SMARCA4_ENST00000358026	SMARCA4_ENST00000358026
SMARCB1	SMARCB1	SMARCB1
SMARCD2	SMARCD2	SMARCD2
SMARCD2_ENST00000323347	SMARCD2_ENST00000323347	SMARCD2_ENST00000323347
SMC1A	SMC1A	SMC1A
SMC5	SMC5	SMC5
SMC6
SMO	SMO	SMO
SNX8	SNX8	SNX8
SOX1	SOX1	SOX1
SOX2	SOX2	SOX2
SOX9	SOX9	SOX9
SP140_ENST00000392045
SP3_ENST00000310015	SP3_ENST00000310015	SP3_ENST00000310015
SPATA17	SPATA17	SPATA17
SPECC1_ENST00000261503
SPOP	SPOP	SPOP
SPRED1	SPRED1	SPRED1
SPRYD5_ENST00000327733
SPTY2D1	SPTY2D1	SPTY2D1
SRSF2	SRSF2	SRSF2
SS18L1_ENST00000331758	SS18L1_ENST00000331758	SS18L1_ENST00000331758
SSTR5	SSTR5	SSTR5
SSX2IP_ENST00000370612	SSX2IP_ENST00000370612	SSX2IP_ENST00000370612
SSX5	SSX5	SSX5
ST3GAL1	ST3GAL1	ST3GAL1
STAG2	STAG2	STAG2
STAG2_ENST00000218089	STAG2_ENST00000218089	STAG2_ENST00000218089
STAM2	STAM2	STAM2
STAMBPL1
STAMBPL1_ENST00000371927
STAT2	STAT2	STAT2
STAT5B	STAT5B	STAT5B
STAU2
STAU2_ENST00000521210
STAU2_ENST00000524300
STC2	STC2	STC2
STEAP3_ENST00000409811	STEAP3_ENST00000409811	STEAP3_ENST00000409811
STK11	STK11	STK11
STK11_ENST00000326873	STK11_ENST00000326873	STK11_ENST00000326873
SUFU	SUFU	SUFU
SUSD5	SUSD5	SUSD5
SUZ12	SUZ12	SUZ12
SYN1_ENST00000295987	SYN1_ENST00000295987	SYN1_ENST00000295987
SYT7	SYT7	SYT7
TACR1	TACR1	TACR1
TAF1	TAF1	TAF1
TAF1_ENST00000276072	TAF1_ENST00000276072	TAF1_ENST00000276072
TAF1_ENST00000449580	TAF1_ENST00000449580	TAF1_ENST00000449580
TAF1B
TAP2_ENST00000374897	TAP2_ENST00000374897	TAP2_ENST00000374897
TAS2R41	TAS2R41	TAS2R41
TBC1D10C
TBC1D23_ENST00000394144
TBC1D24	TBC1D24	TBC1D24
TBC1D2B_ENST00000300584
TBL1XR1	TBL1XR1	TBL1XR1
TBP	TBP	TBP
TBR1	TBR1	TBR1
TBRG4
TBX10	TBX10	TBX10
TBX19	TBX19	TBX19
TBX3	TBX3	TBX3
TBXA2R	TBXA2R	TBXA2R
TCEB3
TCERG1
TCF12	TCF12	TCF12
TCF12_ENST00000438423	TCF12_ENST00000438423	TCF12_ENST00000438423
TCF12_ENST00000452095	TCF12_ENST00000452095	TCF12_ENST00000452095
TCF25_ENST00000263347	TCF25_ENST00000263347	TCF25_ENST00000263347
TCF7L2	TCF7L2	TCF7L2
TCF7L2_ENST00000352065	TCF7L2_ENST00000352065	TCF7L2_ENST00000352065
TCF7L2_ENST00000355717	TCF7L2_ENST00000355717	TCF7L2_ENST00000355717
TCF7L2_ENST00000543371	TCF7L2_ENST00000543371	TCF7L2_ENST00000543371
TCHP	TCHP	TCHP
TEAD2
TET2	TET2	TET2
TET2_ENST00000305737	TET2_ENST00000305737	TET2_ENST00000305737
TEX11
TFE3_ENST00000336239
TGFBR1	TGFBR1	TGFBR1
TGFBR2	TGFBR2	TGFBR2
TGFBR2_ENST00000359013	TGFBR2_ENST00000359013	TGFBR2_ENST00000359013
TGIF1
TGIF2LX	TGIF2LX	TGIF2LX
THBD	THBD	THBD
THOC2
TJAP1	TJAP1	TJAP1
TJAP1_ENST00000372445	TJAP1_ENST00000372445	TJAP1_ENST00000372445
TM9SF3
TMEM130	TMEM130	TMEM130
TMEM161B	TMEM161B	TMEM161B
TMEM232_ENST00000455884	TMEM232_ENST00000455884	TMEM232_ENST00000455884
TMEM79	TMEM79	TMEM79
TMPO
TMPO_ENST00000266732
TMTC3	TMTC3	TMTC3
TNFRSF14_ENST00000355716	TNFRSF14_ENST00000355716	TNFRSF14_ENST00000355716
TNPO1
TNRC6B_ENST00000301923	TNRC6B_ENST00000301923	TNRC6B_ENST00000301923
TNRC6B_ENST00000454349	TNRC6B_ENST00000454349	TNRC6B_ENST00000454349
TP53	TP53	TP53
TP53_ENST00000269305	TP53_ENST00000269305	TP53_ENST00000269305
TP53_ENST00000413465	TP53_ENST00000413465	TP53_ENST00000413465
TP53_ENST00000414315	TP53_ENST00000414315	TP53_ENST00000414315
TP53_ENST00000420246	TP53_ENST00000420246	TP53_ENST00000420246
TP53_ENST00000455263	TP53_ENST00000455263	TP53_ENST00000455263
TP53_ENST00000545858	TP53_ENST00000545858	TP53_ENST00000545858
TP73	TP73	TP73
TP73_ENST00000378288	TP73_ENST00000378288	TP73_ENST00000378288
TRAF7	TRAF7	TRAF7
TRAFD1	TRAFD1	TRAFD1
TRAM1L1
TRDN	TRDN	TRDN
TREML2	TREML2	TREML2
TRIB2	TRIB2	TRIB2
TRIM17_ENST00000456946
TRIM22	TRIM22	TRIM22
TRIM23	TRIM23	TRIM23
TRIM48	TRIM48	TRIM48
TRIM48_ENST00000417545	TRIM48_ENST00000417545	TRIM48_ENST00000417545
TRIM50	TRIM50	TRIM50
TRIM50_ENST00000333149	TRIM50_ENST00000333149	TRIM50_ENST00000333149
TROAP	TROAP	TROAP
TRPV1_ENST00000174621	TRPV1_ENST00000174621	TRPV1_ENST00000174621
TRPV4	TRPV4	TRPV4
TSC1	TSC1	TSC1
TSC1_ENST00000403810	TSC1_ENST00000403810	TSC1_ENST00000403810
TSHR	TSHR	TSHR
TSSK6	TSSK6	TSSK6
TTC3_ENST00000540756
TTK
TTK_ENST00000369798
TTLL10
TUBB4	TUBB4	TUBB4
TUBD1	TUBD1	TUBD1
TXLNA	TXLNA	TXLNA
TXNRD1_ENST00000525566	TXNRD1_ENST00000525566	TXNRD1_ENST00000525566
U2AF1	U2AF1	U2AF1
U2AF1_ENST00000380276	U2AF1_ENST00000380276	U2AF1_ENST00000380276
U2AF2	U2AF2	U2AF2
U2SURP	U2SURP	U2SURP
UBC	UBC	UBC
UBQLN2
UBR5
UPF3A	UPF3A	UPF3A
UPF3B	UPF3B	UPF3B
USO1_ENST00000538159	USO1_ENST00000538159	USO1_ENST00000538159
USP28	USP28	USP28
USP35_ENST00000263311
USP43	USP43	USP43
USP45	USP45	USP45
USP8	USP8	USP8
VHL	VHL	VHL
VIPAR	VIPAR	VIPAR
VIPR1	VIPR1	VIPR1
VSIG1_ENST00000415430	VSIG1_ENST00000415430	VSIG1_ENST00000415430
VWC2L	VWC2L	VWC2L
WAC	WAC	WAC
WDR20_ENST00000454394	WDR20_ENST00000454394	WDR20_ENST00000454394
WDR47
WDR47_ENST00000400794
WNT16
WNT16_ENST00000361301
WNT5B_ENST00000397196	WNT5B_ENST00000397196	WNT5B_ENST00000397196
WRAP53
WT1	WT1	WT1
WT1_ENST00000332351	WT1_ENST00000332351	WT1_ENST00000332351
WT1_ENST00000379079	WT1_ENST00000379079	WT1_ENST00000379079
XPO1	XPO1	XPO1
XPOT
XRN1	XRN1	XRN1
XYLT2
YAP1	YAP1	YAP1
YAP1_ENST00000282441	YAP1_ENST00000282441	YAP1_ENST00000282441
YES1	YES1	YES1
YLPM1	YLPM1	YLPM1
YLPM1_ENST00000325680	YLPM1_ENST00000325680	YLPM1_ENST00000325680
YTHDF3	YTHDF3	YTHDF3
ZAN_ENST00000546213
ZBTB26	ZBTB26	ZBTB26
ZC3H13	ZC3H13	ZC3H13
ZC3H13_ENST00000242848	ZC3H13_ENST00000242848	ZC3H13_ENST00000242848
ZC3H18
ZDHHC7_ENST00000564466
ZDHHC8
ZDHHC8_ENST00000405930
ZFP2	ZFP2	ZFP2
ZFP36L2	ZFP36L2	ZFP36L2
ZFP37
ZMYM3
ZNF135	ZNF135	ZNF135
ZNF135_ENST00000401053	ZNF135_ENST00000401053	ZNF135_ENST00000401053
ZNF14	ZNF14	ZNF14
ZNF207
ZNF233
ZNF238	ZNF238	ZNF238
ZNF238_ENST00000358704	ZNF238_ENST00000358704	ZNF238_ENST00000358704
ZNF276	ZNF276	ZNF276
ZNF276_ENST00000443381	ZNF276_ENST00000443381	ZNF276_ENST00000443381
ZNF292	ZNF292	ZNF292
ZNF292_ENST00000369577	ZNF292_ENST00000369577	ZNF292_ENST00000369577
ZNF319	ZNF319	ZNF319
ZNF34
ZNF354B	ZNF354B	ZNF354B
ZNF365
ZNF384_ENST00000361959	ZNF384_ENST00000361959	ZNF384_ENST00000361959
ZNF503	ZNF503	ZNF503
ZNF517	ZNF517	ZNF517
ZNF548_ENST00000336128	ZNF548_ENST00000336128	ZNF548_ENST00000336128
ZNF563
ZNF629	ZNF629	ZNF629
ZNF649
ZNF711	ZNF711	ZNF711
ZNF711_ENST00000373165	ZNF711_ENST00000373165	ZNF711_ENST00000373165
ZNF730	ZNF730	ZNF730
ZNF750	ZNF750	ZNF750
ZNF813	ZNF813	ZNF813
ZNF844	ZNF844	ZNF844
ZNF880
ZNF92	ZNF92	ZNF92
ZNRF4	ZNRF4	ZNRF4
ZRSR2	ZRSR2	ZRSR2
	ACAP2
	ADAM10
	AHCTF1
	AHCTF1_ENST00000326225
	ANKMY1_ENST00000361678
	ANKRD33
	ANKRD34C
	ARHGAP35
	ARID1B_ENST00000346085
	ARMC6_ENST00000535612
	ATF6
	ATF7IP
	AXL
	BCMO1
	BDKRB1
	BIN2
	BTNL3
	C12orf4
	CAPN7
	CAPZA3
	CASD1
	CCAR1
	CCDC102B_ENST00000584156
	CCDC14
	CCDC14_ENST00000488653
	CCDC6
	CENPI
	CFP
	CHRDL1
	CLSPN
	CLSPN_ENST00000251195
	CNR1
	COLQ
	COLQ_ENST00000383781
	CPN2
	DDX4
	DDX4_ENST00000505374
	EDIL3
	EPYC
	FAM126A
	FANCC_ENST00000289081
	FBXO7
	FDXACB1
	FGD4
	FOXP1
	FTSJD1
	GCFC1
	GNPTAB
	GOLGA5_ENST00000163416
	HDX
	HGF
	HOMEZ_ENST00000357460
	IL1RAP_ENST00000443369
	IL1RAPL1
	IL1RAPL1_ENST00000378993
	ING1_ENST00000375774
	KIF25
	KLRAQ1
	KRI1
	LIN54
	LRRFIP2
	LUZP1
	MALT1_ENST00000348428
	MAP4K1_ENST00000396857
	MAP9
	MBOAT1
	MCM6
	MCM7
	MGAM
	MLLT4_ENST00000392108
	MORC4
	MPP5
	MYCBP2_ENST00000360084
	NAPRT1_ENST00000276844
	NAPRT1_ENST00000449291
	NFIX
	NFIX_ENST00000360105
	NGLY1_ENST00000428257
	NXF1
	OPRM1_ENST00000419506
	OR2T4
	OR2W3
	OR9G1
	PAN3
	PAN3_ENST00000380958
	PCDHGA9
	PCDHGA9_ENST00000573521
	PKD2
	PPP1R21
	PRKAR1A
	PRL
	RARS
	RIOK3
	RNF19A
	RNF20
	RSRC2
	SAMSN1
	SELL_ENST00000236147
	SLC35F1
	SMARCD1
	SPATA20
	SPNS3
	STIP1
	SUPT16H
	TAOK1_ENST00000261716
	TARS
	TAS2R1
	TAS2R60
	TCEA3
	TCEB3C
	TNFRSF11B
	TNFRSF11B_ENST00000297350
	TNFSF11
	TNRC6B
	TRIM37
	TRPV1_ENST00000399756
	TSGA10
	UGT2B17
	USP7
	USP9X
	USP9X_ENST00000324545
	VPS53
	WDR20
	XRCC6
	ZFP37_ENST00000553380
	ZMYND10
	ZNF136
	ZNF215
	ZNF224
	ZNF23
	ZNF323
	ZNF418
	ZNF441
	ZNF491
	ZNF626_ENST00000392298
	ZNF71
	ZNF853
	ZNF853_ENST00000457543
	ZNRF3
	ZNRF3_ENST00000544604

## Sheet: CG_SOr2-CG_SSIr2
CG_SSIr2_2SD	CG_SOr2_2SD	in both lists			Number of transcripts	%
AASDH				CG_SSIr2_2SD	861	80.4878
AASDH_ENST00000502617				CG_SOr2_2SD	780	88.8462
ABCB8_ENST00000356058	ABCB8_ENST00000356058	ABCB8_ENST00000356058		in both lists	693
ABCG8	ABCG8	ABCG8
ACKR3	ACKR3	ACKR3
ACTA1	ACTA1	ACTA1
ACVR2A	ACVR2A	ACVR2A
ADD1_ENST00000398125	ADD1_ENST00000398125	ADD1_ENST00000398125
ADD3
ADNP
ADRA1A_ENST00000358857	ADRA1A_ENST00000358857	ADRA1A_ENST00000358857
ADRA1A_ENST00000380572	ADRA1A_ENST00000380572	ADRA1A_ENST00000380572
ADRA1B	ADRA1B	ADRA1B
AGTPBP1_ENST00000376109	AGTPBP1_ENST00000376109	AGTPBP1_ENST00000376109
AIM2
AKAP7
AKT1	AKT1	AKT1
ALPL	ALPL	ALPL
ALX4
AMDHD2_ENST00000413459	AMDHD2_ENST00000413459	AMDHD2_ENST00000413459
AMER1	AMER1	AMER1
AMIGO3	AMIGO3	AMIGO3
ANGPTL2	ANGPTL2	ANGPTL2
ANKMY1_ENST00000361678	ANKMY1_ENST00000361678	ANKMY1_ENST00000361678
ANKMY1_ENST00000405523	ANKMY1_ENST00000405523	ANKMY1_ENST00000405523
ANKRD33	ANKRD33	ANKRD33
ANKS3	ANKS3	ANKS3
ANTXR2
AP1B1	AP1B1	AP1B1
AP1B1_ENST00000415447	AP1B1_ENST00000415447	AP1B1_ENST00000415447
AP1M1	AP1M1	AP1M1
APC	APC	APC
AQP7	AQP7	AQP7
AR_ENST00000396043	AR_ENST00000396043	AR_ENST00000396043
ARFGAP3
ARHGEF16	ARHGEF16	ARHGEF16
ARID1A	ARID1A	ARID1A
ARID2	ARID2	ARID2
ARID5A	ARID5A	ARID5A
ASMTL	ASMTL	ASMTL
ASMTL_ENST00000381317	ASMTL_ENST00000381317	ASMTL_ENST00000381317
ASXL1	ASXL1	ASXL1
ASXL1_ENST00000306058	ASXL1_ENST00000306058	ASXL1_ENST00000306058
ATM	ATM	ATM
ATM_ENST00000278616	ATM_ENST00000278616	ATM_ENST00000278616
ATP6V1B1
ATRX	ATRX	ATRX
ATRX_ENST00000373344	ATRX_ENST00000373344	ATRX_ENST00000373344
AXIN1	AXIN1	AXIN1
B2M	B2M	B2M
B2M_ENST00000544417	B2M_ENST00000544417	B2M_ENST00000544417
B3GALT1	B3GALT1	B3GALT1
BAP1	BAP1	BAP1
BARHL2	BARHL2	BARHL2
BCL11A_ENST00000356842	BCL11A_ENST00000356842	BCL11A_ENST00000356842
BCL9L
BCL9L_ENST00000392849
BCMO1	BCMO1	BCMO1
BCOR	BCOR	BCOR
BCORL1
BDKRB2	BDKRB2	BDKRB2
BIN1	BIN1	BIN1
BIRC3	BIRC3	BIRC3
BMPR2	BMPR2	BMPR2
BPI	BPI	BPI
BRAF	BRAF	BRAF
BRD7	BRD7	BRD7
BTBD17	BTBD17	BTBD17
BTBD7_ENST00000298896
BTN3A1	BTN3A1	BTN3A1
C14orf43
C15orf27	C15orf27	C15orf27
C16orf88
C17orf28	C17orf28	C17orf28
C17orf63	C17orf63	C17orf63
C17orf63_ENST00000341217	C17orf63_ENST00000341217	C17orf63_ENST00000341217
C17orf70	C17orf70	C17orf70
C17orf70_ENST00000327787	C17orf70_ENST00000327787	C17orf70_ENST00000327787
C1orf114
C22orf28
C7orf72	C7orf72	C7orf72
C8orf45	C8orf45	C8orf45
C9orf131
CACNB1	CACNB1	CACNB1
CACNG2	CACNG2	CACNG2
CALB2	CALB2	CALB2
CaMK1b	CaMK1b	CaMK1b
CARD9_ENST00000371734	CARD9_ENST00000371734	CARD9_ENST00000371734
CASP8	CASP8	CASP8
CASP8_ENST00000264275	CASP8_ENST00000264275	CASP8_ENST00000264275
CASP8_ENST00000358485	CASP8_ENST00000358485	CASP8_ENST00000358485
CBFB_ENST00000290858	CBFB_ENST00000290858	CBFB_ENST00000290858
CBFB_ENST00000412916	CBFB_ENST00000412916	CBFB_ENST00000412916
CBLN4	CBLN4	CBLN4
CBX6	CBX6	CBX6
CCDC116	CCDC116	CCDC116
CCDC28A
CCDC41	CCDC41	CCDC41
CCDC66	CCDC66	CCDC66
CCDC66_ENST00000394672	CCDC66_ENST00000394672	CCDC66_ENST00000394672
CCDC66_ENST00000436465	CCDC66_ENST00000436465	CCDC66_ENST00000436465
CCDC73
CCNJL	CCNJL	CCNJL
CCR4	CCR4	CCR4
CCR7	CCR7	CCR7
CCT3
CCT7_ENST00000258091	CCT7_ENST00000258091	CCT7_ENST00000258091
CD79A
CDC14A
CDC7	CDC7	CDC7
CDC73	CDC73	CDC73
CDCP2	CDCP2	CDCP2
CDH1	CDH1	CDH1
CDH26
CDK8	CDK8	CDK8
CDKN1A	CDKN1A	CDKN1A
CDKN1A_ENST00000448526	CDKN1A_ENST00000448526	CDKN1A_ENST00000448526
CDKN1B	CDKN1B	CDKN1B
CDKN2A	CDKN2A	CDKN2A
CDKN2A_ENST00000446177	CDKN2A_ENST00000446177	CDKN2A_ENST00000446177
CDKN2A_ENST00000498124	CDKN2A_ENST00000498124	CDKN2A_ENST00000498124
CEBPA
CENPC1
CEP290_ENST00000309041	CEP290_ENST00000309041	CEP290_ENST00000309041
CERK
CES5A	CES5A	CES5A
CETP	CETP	CETP
CHEK2	CHEK2	CHEK2
CHEK2_ENST00000382580	CHEK2_ENST00000382580	CHEK2_ENST00000382580
CHRM4	CHRM4	CHRM4
CHRNG	CHRNG	CHRNG
CHST12	CHST12	CHST12
CHST4	CHST4	CHST4
CKAP2
CLCN7	CLCN7	CLCN7
CLOCK
CNKSR3	CNKSR3	CNKSR3
CPEB2
CPEB2_ENST00000538197
CPN2	CPN2	CPN2
CRHR2	CRHR2	CRHR2
CRHR2_ENST00000348438	CRHR2_ENST00000348438	CRHR2_ENST00000348438
CRISPLD2	CRISPLD2	CRISPLD2
CRMP1	CRMP1	CRMP1
CRP	CRP	CRP
CRTC1
CRTC1_ENST00000338797
CTCF	CTCF	CTCF
CTNNB1	CTNNB1	CTNNB1
CTNND1	CTNND1	CTNND1
CTNND1_ENST00000399050	CTNND1_ENST00000399050	CTNND1_ENST00000399050
CX3CR1	CX3CR1	CX3CR1
CX3CR1_ENST00000358309	CX3CR1_ENST00000358309	CX3CR1_ENST00000358309
CYLD	CYLD	CYLD
CYP27A1	CYP27A1	CYP27A1
CYP4F11	CYP4F11	CYP4F11
CYP4F2	CYP4F2	CYP4F2
CSNK2A1	CSNK2A1	CSNK2A1
DAGLB	DAGLB	DAGLB
DAZAP1
DDX26B
DDX27
DENND1A_ENST00000373618	DENND1A_ENST00000373618	DENND1A_ENST00000373618
DENND1A_ENST00000373620	DENND1A_ENST00000373620	DENND1A_ENST00000373620
DFNA5	DFNA5	DFNA5
DHCR7	DHCR7	DHCR7
DHCR7_ENST00000355527	DHCR7_ENST00000355527	DHCR7_ENST00000355527
DHRS2	DHRS2	DHRS2
DHRS2_ENST00000344777	DHRS2_ENST00000344777	DHRS2_ENST00000344777
DHX16
DHX16_ENST00000376437
DHX16_ENST00000376442
DLL1	DLL1	DLL1
DMRT3	DMRT3	DMRT3
DRD2_ENST00000355319	DRD2_ENST00000355319	DRD2_ENST00000355319
DUSP16	DUSP16	DUSP16
DUX4L1	DUX4L1	DUX4L1
DUX4L2	DUX4L2	DUX4L2
DYNC1I2
DYNC1LI1
DYRK1A_ENST00000338785	DYRK1A_ENST00000338785	DYRK1A_ENST00000338785
EEF1D	EEF1D	EEF1D
EEF1D_ENST00000423316	EEF1D_ENST00000423316	EEF1D_ENST00000423316
EGFR	EGFR	EGFR
EGR4	EGR4	EGR4
EHD1	EHD1	EHD1
EHD3	EHD3	EHD3
EHD4	EHD4	EHD4
EIF1AX	EIF1AX	EIF1AX
EIF2AK1	EIF2AK1	EIF2AK1
EIF2AK1_ENST00000536084	EIF2AK1_ENST00000536084	EIF2AK1_ENST00000536084
EME2	EME2	EME2
EME2_ENST00000307394	EME2_ENST00000307394	EME2_ENST00000307394
ENG	ENG	ENG
ENG_ENST00000373203	ENG_ENST00000373203	ENG_ENST00000373203
ENPP7	ENPP7	ENPP7
ENSG00000198064	ENSG00000198064	ENSG00000198064
ENSG00000226807	ENSG00000226807	ENSG00000226807
ENTPD2	ENTPD2	ENTPD2
EP300	EP300	EP300
EPB41L5_ENST00000443124
ERBB2	ERBB2	ERBB2
ERBB2_ENST00000541774	ERBB2_ENST00000541774	ERBB2_ENST00000541774
ERBB3	ERBB3	ERBB3
ERBB3_ENST00000267101	ERBB3_ENST00000267101	ERBB3_ENST00000267101
ERBB3_ENST00000411731	ERBB3_ENST00000411731	ERBB3_ENST00000411731
ERCC2_ENST00000485403	ERCC2_ENST00000485403	ERCC2_ENST00000485403
ESRP1
ESRP1_ENST00000433389
ETV4_ENST00000319349	ETV4_ENST00000319349	ETV4_ENST00000319349
EXT1	EXT1	EXT1
EZH2	EZH2	EZH2
EZH2_ENST00000350995	EZH2_ENST00000350995	EZH2_ENST00000350995
FAM108A1	FAM108A1	FAM108A1
FAM123B_ENST00000330258	FAM123B_ENST00000330258	FAM123B_ENST00000330258
FAM181A
FAM39B	FAM39B	FAM39B
FAS	FAS	FAS
FBRS_ENST00000356166	FBRS_ENST00000356166	FBRS_ENST00000356166
FBXO7	FBXO7	FBXO7
FBXO7_ENST00000266087	FBXO7_ENST00000266087	FBXO7_ENST00000266087
FBXO7_ENST00000382058	FBXO7_ENST00000382058	FBXO7_ENST00000382058
FBXW2_ENST00000373926	FBXW2_ENST00000373926	FBXW2_ENST00000373926
FBXW7	FBXW7	FBXW7
FBXW7_ENST00000281708	FBXW7_ENST00000281708	FBXW7_ENST00000281708
FBXW7_ENST00000296555	FBXW7_ENST00000296555	FBXW7_ENST00000296555
FBXW7_ENST00000393956	FBXW7_ENST00000393956	FBXW7_ENST00000393956
FBXW7_ENST00000534231	FBXW7_ENST00000534231	FBXW7_ENST00000534231
FBXW7_NM_018315_2	FBXW7_NM_018315_2	FBXW7_NM_018315_2
FCN2	FCN2	FCN2
FEM1A	FEM1A	FEM1A
FETUB
FGFR3	FGFR3	FGFR3
FH	FH	FH
FLT3	FLT3	FLT3
FOXD4	FOXD4	FOXD4
FOXD4_ENST00000382500	FOXD4_ENST00000382500	FOXD4_ENST00000382500
FOXG1	FOXG1	FOXG1
FOXI1	FOXI1	FOXI1
FOXL2	FOXL2	FOXL2
FOXP2	FOXP2	FOXP2
FOXP2_ENST00000393500	FOXP2_ENST00000393500	FOXP2_ENST00000393500
FOXP2_ENST00000403559	FOXP2_ENST00000403559	FOXP2_ENST00000403559
FUBP1_ENST00000370767	FUBP1_ENST00000370767	FUBP1_ENST00000370767
FUBP1_ENST00000370768	FUBP1_ENST00000370768	FUBP1_ENST00000370768
FUBP1_ENST00000436586	FUBP1_ENST00000436586	FUBP1_ENST00000436586
FUBP3
FURIN	FURIN	FURIN
FUS	FUS	FUS
FUS_ENST00000254108	FUS_ENST00000254108	FUS_ENST00000254108
FUT1	FUT1	FUT1
FXR1
FXR2
FZD2	FZD2	FZD2
GAA	GAA	GAA
GABRD	GABRD	GABRD
GATA2	GATA2	GATA2
GCK_ENST00000395796	GCK_ENST00000395796	GCK_ENST00000395796
GFPT2	GFPT2	GFPT2
GIGYF2	GIGYF2	GIGYF2
GIGYF2_ENST00000409451	GIGYF2_ENST00000409451	GIGYF2_ENST00000409451
GIGYF2_ENST00000452341	GIGYF2_ENST00000452341	GIGYF2_ENST00000452341
GJA3	GJA3	GJA3
GJA8	GJA8	GJA8
GJB4	GJB4	GJB4
GLT6D1	GLT6D1	GLT6D1
GNAS	GNAS	GNAS
GP1BA	GP1BA	GP1BA
GP5	GP5	GP5
GP5_ENST00000323007	GP5_ENST00000323007	GP5_ENST00000323007
GPR108	GPR108	GPR108
GPR152	GPR152	GPR152
GPR26	GPR26	GPR26
GPR31	GPR31	GPR31
GPR77	GPR77	GPR77
GPR97	GPR97	GPR97
GRK4_ENST00000398052
GRM6	GRM6	GRM6
GRPR	GRPR	GRPR
GSDMB	GSDMB	GSDMB
GSDMB_ENST00000418519	GSDMB_ENST00000418519	GSDMB_ENST00000418519
GTPBP5	GTPBP5	GTPBP5
GUF1
H3F3A	H3F3A	H3F3A
HAPLN4	HAPLN4	HAPLN4
HCRTR1	HCRTR1	HCRTR1
HIAT1
HLA-A	HLA-A	HLA-A
HLA-A_ENST00000376806	HLA-A_ENST00000376806	HLA-A_ENST00000376806
HLA-B	HLA-B	HLA-B
HMMR
HNF1A
HNRNPL
HNRNPR	HNRNPR	HNRNPR
HNRPL
HNRPR	HNRPR	HNRPR
HOXA11	HOXA11	HOXA11
HOXB3	HOXB3	HOXB3
HOXD10	HOXD10	HOXD10
HOXD3	HOXD3	HOXD3
HPS6
HRAS	HRAS	HRAS
HRAS_ENST00000397594	HRAS_ENST00000397594	HRAS_ENST00000397594
HS3ST3A1	HS3ST3A1	HS3ST3A1
HSD3B1	HSD3B1	HSD3B1
HSPA2	HSPA2	HSPA2
IDH1	IDH1	IDH1
IDH2	IDH2	IDH2
IFT57	IFT57	IFT57
IGSF21	IGSF21	IGSF21
IL12RB1	IL12RB1	IL12RB1
IL12RB1_ENST00000430026	IL12RB1_ENST00000430026	IL12RB1_ENST00000430026
IL12RB1_ENST00000593993	IL12RB1_ENST00000593993	IL12RB1_ENST00000593993
IMP5	IMP5	IMP5
ING1	ING1	ING1
ING1_ENST00000338450	ING1_ENST00000338450	ING1_ENST00000338450
IRF2BPL	IRF2BPL	IRF2BPL
IRF3	IRF3	IRF3
IRGQ	IRGQ	IRGQ
ITFG3_ENST00000450082	ITFG3_ENST00000450082	ITFG3_ENST00000450082
ITGA11	ITGA11	ITGA11
ITPRIP	ITPRIP	ITPRIP
IWS1	IWS1	IWS1
JAK2	JAK2	JAK2
JAK3_ENST00000534444	JAK3_ENST00000534444	JAK3_ENST00000534444
JPH4
KCNC1	KCNC1	KCNC1
KCNC1_ENST00000265969	KCNC1_ENST00000265969	KCNC1_ENST00000265969
KCNG1_ENST00000396017	KCNG1_ENST00000396017	KCNG1_ENST00000396017
KCNG4	KCNG4	KCNG4
KCNJ11	KCNJ11	KCNJ11
KCNJ5	KCNJ5	KCNJ5
KCNK1	KCNK1	KCNK1
KCNK3	KCNK3	KCNK3
KCNN2	KCNN2	KCNN2
KCNN2_ENST00000512097	KCNN2_ENST00000512097	KCNN2_ENST00000512097
KCNN4	KCNN4	KCNN4
KCNQ1	KCNQ1	KCNQ1
KCNQ1_ENST00000335475	KCNQ1_ENST00000335475	KCNQ1_ENST00000335475
KCTD3
KDM6A	KDM6A	KDM6A
KDM6A_ENST00000377967	KDM6A_ENST00000377967	KDM6A_ENST00000377967
KDM6A_ENST00000382899	KDM6A_ENST00000382899	KDM6A_ENST00000382899
KEAP1	KEAP1	KEAP1
KIT	KIT	KIT
KLF3
KLHDC5
KLHDC8A	KLHDC8A	KLHDC8A
KLHL14_ENST00000358095	KLHL14_ENST00000358095	KLHL14_ENST00000358095
KLHL23	KLHL23	KLHL23
KMT2C	KMT2C	KMT2C
KMT2D	KMT2D	KMT2D
KRAS	KRAS	KRAS
KRAS_ENST00000256078	KRAS_ENST00000256078	KRAS_ENST00000256078
KRT15	KRT15	KRT15
KRT82	KRT82	KRT82
KRT85	KRT85	KRT85
KRTAP27-1	KRTAP27-1	KRTAP27-1
KRTAP5-4	KRTAP5-4	KRTAP5-4
LARP4B
LARP7
LATS1_ENST00000253339	LATS1_ENST00000253339	LATS1_ENST00000253339
LATS1_ENST00000392273	LATS1_ENST00000392273	LATS1_ENST00000392273
LATS1_ENST00000543571	LATS1_ENST00000543571	LATS1_ENST00000543571
LCOR	LCOR	LCOR
LGR6_ENST00000255432	LGR6_ENST00000255432	LGR6_ENST00000255432
LGR6_ENST00000439764	LGR6_ENST00000439764	LGR6_ENST00000439764
LHFPL3	LHFPL3	LHFPL3
LHFPL3_ENST00000543266	LHFPL3_ENST00000543266	LHFPL3_ENST00000543266
LHFPL5	LHFPL5	LHFPL5
LIN54	LIN54	LIN54
LINC00273	LINC00273	LINC00273
LINC00273_ENST00000539813	LINC00273_ENST00000539813	LINC00273_ENST00000539813
LMAN1	LMAN1	LMAN1
LMX1B	LMX1B	LMX1B
LMX1B_ENST00000355497	LMX1B_ENST00000355497	LMX1B_ENST00000355497
LMX1B_ENST00000373474	LMX1B_ENST00000373474	LMX1B_ENST00000373474
LRRC14B	LRRC14B	LRRC14B
LRRC33	LRRC33	LRRC33
LRRC52	LRRC52	LRRC52
LRRC8A	LRRC8A	LRRC8A
LRRD1	LRRD1	LRRD1
LRRTM2	LRRTM2	LRRTM2
LUC7L2	LUC7L2	LUC7L2
LUZP4	LUZP4	LUZP4
MAML2	MAML2	MAML2
MAN1A2	MAN1A2	MAN1A2
MANEA	MANEA	MANEA
MAP2K1	MAP2K1	MAP2K1
MAP2K4	MAP2K4	MAP2K4
MAP3K1_ENST00000399503	MAP3K1_ENST00000399503	MAP3K1_ENST00000399503
MAP4K1_ENST00000396857	MAP4K1_ENST00000396857	MAP4K1_ENST00000396857
MAPK13	MAPK13	MAPK13
MATR3	MATR3	MATR3
MAX	MAX	MAX
MAX_ENST00000284165	MAX_ENST00000284165	MAX_ENST00000284165
MAX_ENST00000556979	MAX_ENST00000556979	MAX_ENST00000556979
MBD6
MCHR2
MCHR2_ENST00000369212	MCHR2_ENST00000369212	MCHR2_ENST00000369212
MCPH1_ENST00000344683
MDM2	MDM2	MDM2
MDM2_ENST00000462284	MDM2_ENST00000462284	MDM2_ENST00000462284
MED12	MED12	MED12
MED12_ENST00000333646	MED12_ENST00000333646	MED12_ENST00000333646
MEN1	MEN1	MEN1
MESP2	MESP2	MESP2
MFAP3L	MFAP3L	MFAP3L
MFRP
MGA	MGA	MGA
MLH1	MLH1	MLH1
MLL2_ENST00000301067	MLL2_ENST00000301067	MLL2_ENST00000301067
MLL3_ENST00000355193	MLL3_ENST00000355193	MLL3_ENST00000355193
MLL4
MLLT3	MLLT3	MLLT3
MMP14	MMP14	MMP14
MOS	MOS	MOS
MRGPRX1	MRGPRX1	MRGPRX1
MSH2	MSH2	MSH2
MSH3
MSH3_ENST00000265081
MSH6	MSH6	MSH6
MSL2	MSL2	MSL2
MSN	MSN	MSN
MTF2
MTMR2	MTMR2	MTMR2
MTMR2_ENST00000346299	MTMR2_ENST00000346299	MTMR2_ENST00000346299
MTNR1A	MTNR1A	MTNR1A
MVK
MXRA8
MYADM	MYADM	MYADM
MYCN	MYCN	MYCN
MYD88	MYD88	MYD88
MYD88_ENST00000417037	MYD88_ENST00000417037	MYD88_ENST00000417037
NARFL	NARFL	NARFL
NBN
NCK2	NCK2	NCK2
NCK2_ENST00000233154	NCK2_ENST00000233154	NCK2_ENST00000233154
NCOR1_ENST00000436828	NCOR1_ENST00000436828	NCOR1_ENST00000436828
NEK1_ENST00000507142
NEUROD6	NEUROD6	NEUROD6
NF1	NF1	NF1
NF1_ENST00000358273	NF1_ENST00000358273	NF1_ENST00000358273
NF1_ENST00000444181	NF1_ENST00000444181	NF1_ENST00000444181
NF2	NF2	NF2
NF2_ENST00000403999	NF2_ENST00000403999	NF2_ENST00000403999
NFE2L1	NFE2L1	NFE2L1
NFE2L2	NFE2L2	NFE2L2
NFIX_ENST00000360105	NFIX_ENST00000360105	NFIX_ENST00000360105
NGFR	NGFR	NGFR
NLRC3	NLRC3	NLRC3
NMUR2	NMUR2	NMUR2
NOSTRIN_ENST00000444448
NOVA1	NOVA1	NOVA1
NPEPPS	NPEPPS	NPEPPS
NPTX2	NPTX2	NPTX2
NRAS	NRAS	NRAS
NSUN6	NSUN6	NSUN6
NTNG2	NTNG2	NTNG2
NTNG2_ENST00000360670	NTNG2_ENST00000360670	NTNG2_ENST00000360670
NTNG2_ENST00000372179	NTNG2_ENST00000372179	NTNG2_ENST00000372179
NUB1
NXN	NXN	NXN
OFD1
OLAH
OPRL1	OPRL1	OPRL1
OPRM1_ENST00000414028	OPRM1_ENST00000414028	OPRM1_ENST00000414028
OPTN
OR10G7	OR10G7	OR10G7
OR10G8	OR10G8	OR10G8
OR10H1	OR10H1	OR10H1
OR10H2	OR10H2	OR10H2
OR11G2	OR11G2	OR11G2
OR1C1	OR1C1	OR1C1
OR1F1	OR1F1	OR1F1
OR1G1	OR1G1	OR1G1
OR2A12	OR2A12	OR2A12
OR2A2	OR2A2	OR2A2
OR2A5	OR2A5	OR2A5
OR2B11	OR2B11	OR2B11
OR2C1	OR2C1	OR2C1
OR2J2
OR2L1P	OR2L1P	OR2L1P
OR2T34	OR2T34	OR2T34
OR2T4	OR2T4	OR2T4
OR2W3	OR2W3	OR2W3
OR2Y1	OR2Y1	OR2Y1
OR3A4	OR3A4	OR3A4
OR4C3	OR4C3	OR4C3
OR4D1	OR4D1	OR4D1
OR4X2	OR4X2	OR4X2
OR5AK2	OR5AK2	OR5AK2
OR5AU1	OR5AU1	OR5AU1
OR5B2	OR5B2	OR5B2
OR5M10	OR5M10	OR5M10
OR6C65	OR6C65	OR6C65
OR6C75
OR6M1	OR6M1	OR6M1
OR8B12	OR8B12	OR8B12
OR9A4	OR9A4	OR9A4
OTX1	OTX1	OTX1
OTX2	OTX2	OTX2
P2RY2	P2RY2	P2RY2
PACSIN2	PACSIN2	PACSIN2
PAOX_ENST00000357296	PAOX_ENST00000357296	PAOX_ENST00000357296
PAX6
PBRM1	PBRM1	PBRM1
PBRM1_ENST00000296302	PBRM1_ENST00000296302	PBRM1_ENST00000296302
PBRM1_ENST00000356770	PBRM1_ENST00000356770	PBRM1_ENST00000356770
PCDHA11	PCDHA11	PCDHA11
PCDHA9	PCDHA9	PCDHA9
PCDHA9_ENST00000532602	PCDHA9_ENST00000532602	PCDHA9_ENST00000532602
PCDHB18	PCDHB18	PCDHB18
PCDHGA12	PCDHGA12	PCDHGA12
PCDHGA12_ENST00000252085	PCDHGA12_ENST00000252085	PCDHGA12_ENST00000252085
PCDHGA3	PCDHGA3	PCDHGA3
PCDHGA3_ENST00000253812	PCDHGA3_ENST00000253812	PCDHGA3_ENST00000253812
PCDHGA9	PCDHGA9	PCDHGA9
PCDHGA9_ENST00000573521	PCDHGA9_ENST00000573521	PCDHGA9_ENST00000573521
PCDHGB1	PCDHGB1	PCDHGB1
PCDHGB1_ENST00000523390	PCDHGB1_ENST00000523390	PCDHGB1_ENST00000523390
PDCD1
PDE6B	PDE6B	PDE6B
PDS5B
PGC	PGC	PGC
PHACTR4
PHF6	PHF6	PHF6
PHF6_ENST00000332070	PHF6_ENST00000332070	PHF6_ENST00000332070
PIGB
PIK3C2G_ENST00000538779	PIK3C2G_ENST00000538779	PIK3C2G_ENST00000538779
PIK3CA	PIK3CA	PIK3CA
PIK3CA_ENST00000263967	PIK3CA_ENST00000263967	PIK3CA_ENST00000263967
PIK3R1	PIK3R1	PIK3R1
PIK3R1_ENST00000320694	PIK3R1_ENST00000320694	PIK3R1_ENST00000320694
PIK3R1_ENST00000336483	PIK3R1_ENST00000336483	PIK3R1_ENST00000336483
PIK3R3	PIK3R3	PIK3R3
PIK3R3_ENST00000540385	PIK3R3_ENST00000540385	PIK3R3_ENST00000540385
PLBD2	PLBD2	PLBD2
PLEKHA6
PLUNC	PLUNC	PLUNC
PNCK_ENST00000370145	PNCK_ENST00000370145	PNCK_ENST00000370145
PNCK_ENST00000393831	PNCK_ENST00000393831	PNCK_ENST00000393831
PNCK_ENST00000447676	PNCK_ENST00000447676	PNCK_ENST00000447676
PNISR	PNISR	PNISR
PNKP	PNKP	PNKP
PNKP_ENST00000322344	PNKP_ENST00000322344	PNKP_ENST00000322344
PNMAL2_ENST00000599531	PNMAL2_ENST00000599531	PNMAL2_ENST00000599531
POLM
PPM1D	PPM1D	PPM1D
PPP2R1A	PPP2R1A	PPP2R1A
PPP2R3B	PPP2R3B	PPP2R3B
PPP2R3B_ENST00000390665	PPP2R3B_ENST00000390665	PPP2R3B_ENST00000390665
PPP6C	PPP6C	PPP6C
PPP6C_ENST00000451402	PPP6C_ENST00000451402	PPP6C_ENST00000451402
PRAMEF2	PRAMEF2	PRAMEF2
PRB3	PRB3	PRB3
PRB3_ENST00000538488	PRB3_ENST00000538488	PRB3_ENST00000538488
PRF1	PRF1	PRF1
PRKACG	PRKACG	PRKACG
PRKAR1B	PRKAR1B	PRKAR1B
PRKCI	PRKCI	PRKCI
PRL	PRL	PRL
PRLHR	PRLHR	PRLHR
PROM2	PROM2	PROM2
PRR5	PRR5	PRR5
PRR5_ENST00000403581	PRR5_ENST00000403581	PRR5_ENST00000403581
PRR5-ARHGAP8	PRR5-ARHGAP8	PRR5-ARHGAP8
PRRT2
PRSS38	PRSS38	PRSS38
PSAPL1_ENST00000319098	PSAPL1_ENST00000319098	PSAPL1_ENST00000319098
PSEN2	PSEN2	PSEN2
PSIP1_ENST00000380733	PSIP1_ENST00000380733	PSIP1_ENST00000380733
PTCH1	PTCH1	PTCH1
PTCH1_ENST00000331920
PTCH1_ENST00000375274
PTCH1_ENST00000430669
PTEN	PTEN	PTEN
PTPN11	PTPN11	PTPN11
PTPRS_ENST00000262963	PTPRS_ENST00000262963	PTPRS_ENST00000262963
PTX4	PTX4	PTX4
PUF60	PUF60	PUF60
PUS7
QKI
QKI_ENST00000275262
QKI_ENST00000392127
QKI_ENST00000453779
QSOX1	QSOX1	QSOX1
RAC1	RAC1	RAC1
RAD50	RAD50	RAD50
RAD50_ENST00000265335	RAD50_ENST00000265335	RAD50_ENST00000265335
RASA1	RASA1	RASA1
RASA1_ENST00000456692	RASA1_ENST00000456692	RASA1_ENST00000456692
RB1	RB1	RB1
RB1_ENST00000267163	RB1_ENST00000267163	RB1_ENST00000267163
RBM10	RBM10	RBM10
RBM27
RBM4	RBM4	RBM4
RBM45
RBM6
RBPJ	RBPJ	RBPJ
RBPJ_ENST00000348160	RBPJ_ENST00000348160	RBPJ_ENST00000348160
RDBP
RFX5
RGR	RGR	RGR
RHOA	RHOA	RHOA
RIT1	RIT1	RIT1
RNF128_ENST00000324342
RNF43	RNF43	RNF43
RNF6	RNF6	RNF6
RP11-368J21.2	RP11-368J21.2	RP11-368J21.2
RP11-368J21.2_ENST00000424340	RP11-368J21.2_ENST00000424340	RP11-368J21.2_ENST00000424340
RP3-402G11_5	RP3-402G11_5	RP3-402G11_5
RPL22
RPN2	RPN2	RPN2
RPS6KL1	RPS6KL1	RPS6KL1
RTDR1	RTDR1	RTDR1
RTKN2
RTN4_ENST00000337526
RTN4RL1	RTN4RL1	RTN4RL1
RUFY2
RUNX1_ENST00000325074	RUNX1_ENST00000325074	RUNX1_ENST00000325074
RUNX1_ENST00000344691	RUNX1_ENST00000344691	RUNX1_ENST00000344691
RUNX1_ENST00000486278	RUNX1_ENST00000486278	RUNX1_ENST00000486278
RUNX2	RUNX2	RUNX2
RUNX2_ENST00000352853	RUNX2_ENST00000352853	RUNX2_ENST00000352853
S1PR3	S1PR3	S1PR3
SAFB2
SARDH	SARDH	SARDH
SARDH_ENST00000371868	SARDH_ENST00000371868	SARDH_ENST00000371868
SBK1_ENST00000341901	SBK1_ENST00000341901	SBK1_ENST00000341901
SCAF4
SCLT1
SCLT1_ENST00000281142
SEC14L4	SEC14L4	SEC14L4
SEC31A_ENST00000395310
SEC31A_ENST00000432794
SEC63
SENP6	SENP6	SENP6
SENP6_ENST00000370014	SENP6_ENST00000370014	SENP6_ENST00000370014
SENP6_ENST00000447266	SENP6_ENST00000447266	SENP6_ENST00000447266
SERPINA4	SERPINA4	SERPINA4
SERPINA5	SERPINA5	SERPINA5
SERPINB10
SETD2	SETD2	SETD2
SETD2_ENST00000409792	SETD2_ENST00000409792	SETD2_ENST00000409792
SF3B1	SF3B1	SF3B1
SH3BP2
SHANK3_ENST00000445220	SHANK3_ENST00000445220	SHANK3_ENST00000445220
SIX6	SIX6	SIX6
SKOR2	SKOR2	SKOR2
SLAIN1
SLC12A7	SLC12A7	SLC12A7
SLC13A3_ENST00000372121	SLC13A3_ENST00000372121	SLC13A3_ENST00000372121
SLC16A1
SLC16A12_ENST00000371790	SLC16A12_ENST00000371790	SLC16A12_ENST00000371790
SLC16A3	SLC16A3	SLC16A3
SLC18A3	SLC18A3	SLC18A3
SLC1A7	SLC1A7	SLC1A7
SLC20A2	SLC20A2	SLC20A2
SLC22A11	SLC22A11	SLC22A11
SLC22A4
SLC22A9
SLC23A2
SLC24A3	SLC24A3	SLC24A3
SLC25A6	SLC25A6	SLC25A6
SLC26A6	SLC26A6	SLC26A6
SLC26A6_ENST00000383733	SLC26A6_ENST00000383733	SLC26A6_ENST00000383733
SLC27A3
SLC28A1_ENST00000537624	SLC28A1_ENST00000537624	SLC28A1_ENST00000537624
SLC2A1	SLC2A1	SLC2A1
SLC2A8	SLC2A8	SLC2A8
SLC34A2	SLC34A2	SLC34A2
SLC35F3	SLC35F3	SLC35F3
SLC35F5
SLC39A4_ENST00000276833	SLC39A4_ENST00000276833	SLC39A4_ENST00000276833
SLC3A2
SLC41A1	SLC41A1	SLC41A1
SLC45A1	SLC45A1	SLC45A1
SLC45A1_ENST00000377479	SLC45A1_ENST00000377479	SLC45A1_ENST00000377479
SLC45A4	SLC45A4	SLC45A4
SLC46A2	SLC46A2	SLC46A2
SLC47A1	SLC47A1	SLC47A1
SLC5A2	SLC5A2	SLC5A2
SLC6A18	SLC6A18	SLC6A18
SLC6A20	SLC6A20	SLC6A20
SLC6A20_ENST00000358525	SLC6A20_ENST00000358525	SLC6A20_ENST00000358525
SLC7A10	SLC7A10	SLC7A10
SLC8A3	SLC8A3	SLC8A3
SLC9A3	SLC9A3	SLC9A3
SLCO4A1	SLCO4A1	SLCO4A1
SLFN12
SLITRK1	SLITRK1	SLITRK1
SMAD2	SMAD2	SMAD2
SMAD2_ENST00000591214	SMAD2_ENST00000591214	SMAD2_ENST00000591214
SMAD4	SMAD4	SMAD4
SMAD4_ENST00000452201	SMAD4_ENST00000452201	SMAD4_ENST00000452201
SMAP1
SMARCB1	SMARCB1	SMARCB1
SMARCD2	SMARCD2	SMARCD2
SMARCD2_ENST00000323347	SMARCD2_ENST00000323347	SMARCD2_ENST00000323347
SMC6
SNX8	SNX8	SNX8
SOX1	SOX1	SOX1
SOX9	SOX9	SOX9
SP3_ENST00000310015	SP3_ENST00000310015	SP3_ENST00000310015
SPATA20	SPATA20	SPATA20
SPNS3	SPNS3	SPNS3
SPOP	SPOP	SPOP
SPRED1	SPRED1	SPRED1
SPRYD5_ENST00000327733
SRSF2	SRSF2	SRSF2
SS18L1_ENST00000331758	SS18L1_ENST00000331758	SS18L1_ENST00000331758
SSTR5	SSTR5	SSTR5
STAG2	STAG2	STAG2
STAG2_ENST00000218089	STAG2_ENST00000218089	STAG2_ENST00000218089
STAMBPL1
STAMBPL1_ENST00000371927
STAU2
STAU2_ENST00000521210
STAU2_ENST00000524300
STC2	STC2	STC2
STEAP3_ENST00000409811	STEAP3_ENST00000409811	STEAP3_ENST00000409811
STK11	STK11	STK11
STK11_ENST00000326873	STK11_ENST00000326873	STK11_ENST00000326873
SUZ12	SUZ12	SUZ12
SYN1_ENST00000295987	SYN1_ENST00000295987	SYN1_ENST00000295987
SYT7	SYT7	SYT7
TACR1	TACR1	TACR1
TAF1B
TAP2_ENST00000374897	TAP2_ENST00000374897	TAP2_ENST00000374897
TAS2R1	TAS2R1	TAS2R1
TBC1D23_ENST00000394144
TBC1D24	TBC1D24	TBC1D24
TBL1XR1	TBL1XR1	TBL1XR1
TBP	TBP	TBP
TBR1	TBR1	TBR1
TBX10	TBX10	TBX10
TBX19	TBX19	TBX19
TBXA2R	TBXA2R	TBXA2R
TBXA2R_ENST00000411851	TBXA2R_ENST00000411851	TBXA2R_ENST00000411851
TCEB3
TCERG1
TCF12	TCF12	TCF12
TCF12_ENST00000438423	TCF12_ENST00000438423	TCF12_ENST00000438423
TCF12_ENST00000452095	TCF12_ENST00000452095	TCF12_ENST00000452095
TCF7L2	TCF7L2	TCF7L2
TCF7L2_ENST00000352065	TCF7L2_ENST00000352065	TCF7L2_ENST00000352065
TCF7L2_ENST00000355717	TCF7L2_ENST00000355717	TCF7L2_ENST00000355717
TCF7L2_ENST00000543371	TCF7L2_ENST00000543371	TCF7L2_ENST00000543371
TEAD2
TET2	TET2	TET2
TET2_ENST00000305737	TET2_ENST00000305737	TET2_ENST00000305737
TFAP2D	TFAP2D	TFAP2D
TFE3_ENST00000336239
TGFBR1	TGFBR1	TGFBR1
TGFBR2	TGFBR2	TGFBR2
TGFBR2_ENST00000359013	TGFBR2_ENST00000359013	TGFBR2_ENST00000359013
TGIF1
TGIF2LX	TGIF2LX	TGIF2LX
THBD	THBD	THBD
TM9SF3
TMEM130	TMEM130	TMEM130
TMEM214	TMEM214	TMEM214
TMEM79	TMEM79	TMEM79
TMPO
TNK1	TNK1	TNK1
TNPO1
TNRC6B_ENST00000301923	TNRC6B_ENST00000301923	TNRC6B_ENST00000301923
TNRC6B_ENST00000454349	TNRC6B_ENST00000454349	TNRC6B_ENST00000454349
TP53	TP53	TP53
TP53_ENST00000269305	TP53_ENST00000269305	TP53_ENST00000269305
TP53_ENST00000413465	TP53_ENST00000413465	TP53_ENST00000413465
TP53_ENST00000414315	TP53_ENST00000414315	TP53_ENST00000414315
TP53_ENST00000420246	TP53_ENST00000420246	TP53_ENST00000420246
TP53_ENST00000455263	TP53_ENST00000455263	TP53_ENST00000455263
TP53_ENST00000545858	TP53_ENST00000545858	TP53_ENST00000545858
TP73_ENST00000378288	TP73_ENST00000378288	TP73_ENST00000378288
TRAM1L1
TRDN	TRDN	TRDN
TREML2	TREML2	TREML2
TRIB2	TRIB2	TRIB2
TRIM17_ENST00000456946
TRIM22	TRIM22	TRIM22
TRIM50	TRIM50	TRIM50
TRIM50_ENST00000333149	TRIM50_ENST00000333149	TRIM50_ENST00000333149
TRIO_ENST00000344135	TRIO_ENST00000344135	TRIO_ENST00000344135
TRPV1_ENST00000174621	TRPV1_ENST00000174621	TRPV1_ENST00000174621
TRPV1_ENST00000399756	TRPV1_ENST00000399756	TRPV1_ENST00000399756
TRPV4	TRPV4	TRPV4
TSC1	TSC1	TSC1
TSC1_ENST00000403810	TSC1_ENST00000403810	TSC1_ENST00000403810
TSC22D2	TSC22D2	TSC22D2
TSSK6	TSSK6	TSSK6
TTK
TTK_ENST00000369798
TTLL10
TUBB4	TUBB4	TUBB4
U2AF1	U2AF1	U2AF1
U2AF1_ENST00000380276	U2AF1_ENST00000380276	U2AF1_ENST00000380276
UBC	UBC	UBC
UBQLN2
UPF3A	UPF3A	UPF3A
USP35_ENST00000263311
USP45	USP45	USP45
VHL	VHL	VHL
VIPR1	VIPR1	VIPR1
VSIG1	VSIG1	VSIG1
VSIG1_ENST00000415430	VSIG1_ENST00000415430	VSIG1_ENST00000415430
VSIG1_ENST00000444426	VSIG1_ENST00000444426	VSIG1_ENST00000444426
WDR18	WDR18	WDR18
WDR20_ENST00000454394	WDR20_ENST00000454394	WDR20_ENST00000454394
WDR47
WNT16
WNT16_ENST00000361301
WNT5B_ENST00000397196	WNT5B_ENST00000397196	WNT5B_ENST00000397196
WNT9B	WNT9B	WNT9B
WT1	WT1	WT1
WT1_ENST00000332351	WT1_ENST00000332351	WT1_ENST00000332351
WT1_ENST00000379079	WT1_ENST00000379079	WT1_ENST00000379079
XPOT
XYLT2
YAP1	YAP1	YAP1
YAP1_ENST00000282441	YAP1_ENST00000282441	YAP1_ENST00000282441
YES1	YES1	YES1
YLPM1	YLPM1	YLPM1
YLPM1_ENST00000325680	YLPM1_ENST00000325680	YLPM1_ENST00000325680
YTHDF3	YTHDF3	YTHDF3
ZAN_ENST00000546213	ZAN_ENST00000546213	ZAN_ENST00000546213
ZBTB26	ZBTB26	ZBTB26
ZC3H13	ZC3H13	ZC3H13
ZC3H18
ZDHHC7_ENST00000564466
ZDHHC8
ZDHHC8_ENST00000405930
ZFP36L2
ZFP37
ZNF135	ZNF135	ZNF135
ZNF135_ENST00000401053	ZNF135_ENST00000401053	ZNF135_ENST00000401053
ZNF14	ZNF14	ZNF14
ZNF207
ZNF224	ZNF224	ZNF224
ZNF233
ZNF238	ZNF238	ZNF238
ZNF238_ENST00000358704	ZNF238_ENST00000358704	ZNF238_ENST00000358704
ZNF276	ZNF276	ZNF276
ZNF276_ENST00000443381	ZNF276_ENST00000443381	ZNF276_ENST00000443381
ZNF319	ZNF319	ZNF319
ZNF365
ZNF384_ENST00000361959	ZNF384_ENST00000361959	ZNF384_ENST00000361959
ZNF503	ZNF503	ZNF503
ZNF517	ZNF517	ZNF517
ZNF563
ZNF629	ZNF629	ZNF629
ZNF71	ZNF71	ZNF71
ZNF730	ZNF730	ZNF730
ZNF750	ZNF750	ZNF750
ZNF813	ZNF813	ZNF813
ZNF880
ZNF92	ZNF92	ZNF92
ZNRF4	ZNRF4	ZNRF4
ZRSR2	ZRSR2	ZRSR2
	ACAP2
	ACVR1B_ENST00000541224
	AGBL3
	AGBL3_ENST00000458078
	AHCTF1_ENST00000326225
	ARHGAP35
	ARID1B
	ASXL2
	ASXL2_ENST00000435504
	ATG14
	BCOR_ENST00000378444
	BCOR_ENST00000378463
	BIN2
	C15orf33
	CAPZA3
	CCDC14
	CCDC14_ENST00000488653
	CCDC82
	CCND3
	CDCA7L
	CEP135
	CEP95
	CEP95_ENST00000556440
	CFI
	CHUK
	COLQ
	COLQ_ENST00000383781
	COLQ_ENST00000435459
	CPA6_ENST00000518549
	CREBBP
	CYLD_ENST00000427738
	DYRK1A
	FAM126A
	FAT
	FAT1
	FGD4
	GNPTAB
	GRLF1
	GRLF1_ENST00000317082
	ING1_ENST00000375774
	KIAA1267
	KLRAQ1
	LUC7L2_ENST00000263545
	LUC7L2_ENST00000541170
	LUZP1
	MBOAT1
	MCM7
	MORC4
	MYCBP2_ENST00000360084
	NAA15
	NCOR1
	NCOR1_ENST00000395851
	NOTCH1
	NOTCH1_ENST00000277541
	PKD2
	PPP1R21
	PTPN2
	RAD21
	RAD54B
	RBBP5
	RBM46
	RTKN2_ENST00000395265
	SAMSN1_ENST00000285670
	SIN3A
	SLC35F1
	SMC5
	SPATA17
	STAT2
	TCEB3C
	TCF25_ENST00000263347
	TMEM232_ENST00000455884
	TNFRSF11B
	TNRC6B
	TSGA10
	UPF3B
	USP28
	USP43
	WAC
	ZC3H13_ENST00000242848
	ZNF292
	ZNF292_ENST00000369577
	ZNF323
	ZNF548_ENST00000336128
	ZNF853
	ZNF853_ENST00000457543
	ZNRF3
	ZNRF3_ENST00000544604

## Sheet: CG_SOr3-CG_SSIr2
CG_SSIr3_2SD	CG_SOr3_2SD	in both lists			Number of transcripts	%
AASDH				CG_SSIr3_2SD	823	80.4374
AASDH_ENST00000502617				CG_SOr3_2SD	751	88.1491
ABCB8_ENST00000356058	ABCB8_ENST00000356058	ABCB8_ENST00000356058		in both lists	662
ABCG8	ABCG8	ABCG8
ACKR3	ACKR3	ACKR3
ACTA1	ACTA1	ACTA1
ACTL9	ACTL9	ACTL9
ACVR1B_ENST00000541224	ACVR1B_ENST00000541224	ACVR1B_ENST00000541224
ACVR2A	ACVR2A	ACVR2A
ADRA1A_ENST00000358857	ADRA1A_ENST00000358857	ADRA1A_ENST00000358857
ADRA1A_ENST00000380572	ADRA1A_ENST00000380572	ADRA1A_ENST00000380572
ADRA1B	ADRA1B	ADRA1B
AGBL3	AGBL3	AGBL3
AGBL3_ENST00000458078	AGBL3_ENST00000458078	AGBL3_ENST00000458078
AGTPBP1_ENST00000376109	AGTPBP1_ENST00000376109	AGTPBP1_ENST00000376109
AIM2
AKAP7
AKT1	AKT1	AKT1
ALPL	ALPL	ALPL
AMDHD2_ENST00000413459	AMDHD2_ENST00000413459	AMDHD2_ENST00000413459
AMER1	AMER1	AMER1
AMIGO3	AMIGO3	AMIGO3
ANGPTL2	ANGPTL2	ANGPTL2
ANKMY1_ENST00000405523	ANKMY1_ENST00000405523	ANKMY1_ENST00000405523
ANKS3	ANKS3	ANKS3
ANTXR2
AP1B1	AP1B1	AP1B1
AP1B1_ENST00000415447	AP1B1_ENST00000415447	AP1B1_ENST00000415447
APC	APC	APC
AQP7	AQP7	AQP7
AQP7_ENST00000539936	AQP7_ENST00000539936	AQP7_ENST00000539936
AR_ENST00000396043	AR_ENST00000396043	AR_ENST00000396043
ARFGAP3
ARHGEF16	ARHGEF16	ARHGEF16
ARID1A	ARID1A	ARID1A
ARID2	ARID2	ARID2
ASMTL	ASMTL	ASMTL
ASMTL_ENST00000381317	ASMTL_ENST00000381317	ASMTL_ENST00000381317
ASXL1	ASXL1	ASXL1
ASXL1_ENST00000306058	ASXL1_ENST00000306058	ASXL1_ENST00000306058
ATHL1	ATHL1	ATHL1
ATM	ATM	ATM
ATM_ENST00000278616	ATM_ENST00000278616	ATM_ENST00000278616
ATP2B3	ATP2B3	ATP2B3
ATP2B3_ENST00000370186	ATP2B3_ENST00000370186	ATP2B3_ENST00000370186
ATP6V1B1
ATRX	ATRX	ATRX
ATRX_ENST00000373344	ATRX_ENST00000373344	ATRX_ENST00000373344
AXIN1	AXIN1	AXIN1
AXIN2
B2M	B2M	B2M
B2M_ENST00000544417	B2M_ENST00000544417	B2M_ENST00000544417
B3GALT1	B3GALT1	B3GALT1
BAP1	BAP1	BAP1
BARHL2	BARHL2	BARHL2
BCL11A	BCL11A	BCL11A
BCL11A_ENST00000356842	BCL11A_ENST00000356842	BCL11A_ENST00000356842
BCL2_ENST00000444484
BCMO1	BCMO1	BCMO1
BCOR	BCOR	BCOR
BDKRB2	BDKRB2	BDKRB2
BIN1	BIN1	BIN1
BIRC3	BIRC3	BIRC3
BMPR2	BMPR2	BMPR2
BPI	BPI	BPI
BRAF	BRAF	BRAF
BRD7	BRD7	BRD7
BRE_ENST00000342045
BTBD17	BTBD17	BTBD17
BTN3A1	BTN3A1	BTN3A1
C14orf43
C15orf27	C15orf27	C15orf27
C16orf88
C17orf28	C17orf28	C17orf28
C17orf63	C17orf63	C17orf63
C17orf63_ENST00000341217	C17orf63_ENST00000341217	C17orf63_ENST00000341217
C17orf70	C17orf70	C17orf70
C17orf70_ENST00000327787	C17orf70_ENST00000327787	C17orf70_ENST00000327787
C22orf28
C5AR1
C9orf131
CACNB1	CACNB1	CACNB1
CACNG2	CACNG2	CACNG2
CACNG5	CACNG5	CACNG5
CALB2	CALB2	CALB2
CaMK1b	CaMK1b	CaMK1b
CARD9_ENST00000371734	CARD9_ENST00000371734	CARD9_ENST00000371734
CASP8	CASP8	CASP8
CASP8_ENST00000264275	CASP8_ENST00000264275	CASP8_ENST00000264275
CASP8_ENST00000358485	CASP8_ENST00000358485	CASP8_ENST00000358485
CBFB_ENST00000290858	CBFB_ENST00000290858	CBFB_ENST00000290858
CBFB_ENST00000412916	CBFB_ENST00000412916	CBFB_ENST00000412916
CBLN4	CBLN4	CBLN4
CBX6	CBX6	CBX6
CCDC116	CCDC116	CCDC116
CCDC28A
CCDC41	CCDC41	CCDC41
CCDC66	CCDC66	CCDC66
CCDC66_ENST00000394672	CCDC66_ENST00000394672	CCDC66_ENST00000394672
CCDC66_ENST00000436465	CCDC66_ENST00000436465	CCDC66_ENST00000436465
CCDC73
CCNJL	CCNJL	CCNJL
CCR4	CCR4	CCR4
CCR7	CCR7	CCR7
CCT7_ENST00000258091	CCT7_ENST00000258091	CCT7_ENST00000258091
CD79A
CDC14A
CDC7	CDC7	CDC7
CDC73	CDC73	CDC73
CDCP2	CDCP2	CDCP2
CDH1	CDH1	CDH1
CDK12	CDK12	CDK12
CDK18_ENST00000429964	CDK18_ENST00000429964	CDK18_ENST00000429964
CDK8	CDK8	CDK8
CDKN1A	CDKN1A	CDKN1A
CDKN1A_ENST00000448526	CDKN1A_ENST00000448526	CDKN1A_ENST00000448526
CDKN1B	CDKN1B	CDKN1B
CDKN2A	CDKN2A	CDKN2A
CDKN2A_ENST00000446177	CDKN2A_ENST00000446177	CDKN2A_ENST00000446177
CDKN2A_ENST00000498124	CDKN2A_ENST00000498124	CDKN2A_ENST00000498124
CEBPA
CENPC1
CEP290
CERK
CETP	CETP	CETP
CHD5_ENST00000262450
CHEK1
CHEK2	CHEK2	CHEK2
CHEK2_ENST00000382580	CHEK2_ENST00000382580	CHEK2_ENST00000382580
CHRM4	CHRM4	CHRM4
CHRNB2	CHRNB2	CHRNB2
CHRNG	CHRNG	CHRNG
CHST11
CHST12	CHST12	CHST12
CKAP2
CLCN7	CLCN7	CLCN7
CLOCK
CNKSR3	CNKSR3	CNKSR3
CPEB2
CPEB2_ENST00000538197
CPN2	CPN2	CPN2
CRHR2	CRHR2	CRHR2
CRHR2_ENST00000348438	CRHR2_ENST00000348438	CRHR2_ENST00000348438
CRISPLD2	CRISPLD2	CRISPLD2
CRMP1	CRMP1	CRMP1
CRP	CRP	CRP
CTCF	CTCF	CTCF
CTNNB1	CTNNB1	CTNNB1
CTNND1	CTNND1	CTNND1
CTNND1_ENST00000399050	CTNND1_ENST00000399050	CTNND1_ENST00000399050
CX3CR1	CX3CR1	CX3CR1
CX3CR1_ENST00000358309	CX3CR1_ENST00000358309	CX3CR1_ENST00000358309
CYLD	CYLD	CYLD
CYP27A1	CYP27A1	CYP27A1
CYP4F11	CYP4F11	CYP4F11
CYP4F2	CYP4F2	CYP4F2
CSNK2A1	CSNK2A1	CSNK2A1
DAGLB	DAGLB	DAGLB
DAZAP1
DDX26B
DDX27
DENND1A_ENST00000373618	DENND1A_ENST00000373618	DENND1A_ENST00000373618
DENND1A_ENST00000373620	DENND1A_ENST00000373620	DENND1A_ENST00000373620
DFNA5	DFNA5	DFNA5
DHCR7	DHCR7	DHCR7
DHCR7_ENST00000355527	DHCR7_ENST00000355527	DHCR7_ENST00000355527
DHRS2_ENST00000344777	DHRS2_ENST00000344777	DHRS2_ENST00000344777
DHX16
DHX16_ENST00000376437
DHX16_ENST00000376442
DIRAS3	DIRAS3	DIRAS3
DLL1	DLL1	DLL1
DMRT3	DMRT3	DMRT3
DRD2
DRD2_ENST00000355319	DRD2_ENST00000355319	DRD2_ENST00000355319
DUSP16	DUSP16	DUSP16
DUX4L1	DUX4L1	DUX4L1
DUX4L2	DUX4L2	DUX4L2
DYNC1I2
DYRK1A_ENST00000338785	DYRK1A_ENST00000338785	DYRK1A_ENST00000338785
EEF1D	EEF1D	EEF1D
EEF1D_ENST00000423316	EEF1D_ENST00000423316	EEF1D_ENST00000423316
EGFR	EGFR	EGFR
EGR4	EGR4	EGR4
EHD1	EHD1	EHD1
EHD3	EHD3	EHD3
EHD4	EHD4	EHD4
EIF1AX	EIF1AX	EIF1AX
EIF2AK1	EIF2AK1	EIF2AK1
EIF2AK1_ENST00000536084	EIF2AK1_ENST00000536084	EIF2AK1_ENST00000536084
EME2	EME2	EME2
EME2_ENST00000307394	EME2_ENST00000307394	EME2_ENST00000307394
ENG	ENG	ENG
ENG_ENST00000373203	ENG_ENST00000373203	ENG_ENST00000373203
ENPP7	ENPP7	ENPP7
ENSG00000198064	ENSG00000198064	ENSG00000198064
ENTPD2	ENTPD2	ENTPD2
EP300	EP300	EP300
EPB41L5_ENST00000443124
EPHB2_ENST00000374627
ERBB2	ERBB2	ERBB2
ERBB2_ENST00000541774	ERBB2_ENST00000541774	ERBB2_ENST00000541774
ERBB3_ENST00000267101	ERBB3_ENST00000267101	ERBB3_ENST00000267101
ERBB3_ENST00000411731	ERBB3_ENST00000411731	ERBB3_ENST00000411731
ERCC2_ENST00000485403	ERCC2_ENST00000485403	ERCC2_ENST00000485403
ESRP1
ESRP1_ENST00000433389
ETV4_ENST00000319349	ETV4_ENST00000319349	ETV4_ENST00000319349
EXT1	EXT1	EXT1
EZH2	EZH2	EZH2
EZH2_ENST00000350995	EZH2_ENST00000350995	EZH2_ENST00000350995
FAM108A1	FAM108A1	FAM108A1
FAM123B_ENST00000330258	FAM123B_ENST00000330258	FAM123B_ENST00000330258
FAM39B	FAM39B	FAM39B
FASTK	FASTK	FASTK
FAT1	FAT1	FAT1
FBRS_ENST00000356166	FBRS_ENST00000356166	FBRS_ENST00000356166
FBXL18	FBXL18	FBXL18
FBXL18_ENST00000382368	FBXL18_ENST00000382368	FBXL18_ENST00000382368
FBXL18_ENST00000453700	FBXL18_ENST00000453700	FBXL18_ENST00000453700
FBXO7_ENST00000382058	FBXO7_ENST00000382058	FBXO7_ENST00000382058
FBXW2_ENST00000373926	FBXW2_ENST00000373926	FBXW2_ENST00000373926
FBXW7	FBXW7	FBXW7
FBXW7_ENST00000281708	FBXW7_ENST00000281708	FBXW7_ENST00000281708
FBXW7_ENST00000296555	FBXW7_ENST00000296555	FBXW7_ENST00000296555
FBXW7_ENST00000393956	FBXW7_ENST00000393956	FBXW7_ENST00000393956
FBXW7_ENST00000534231	FBXW7_ENST00000534231	FBXW7_ENST00000534231
FBXW7_NM_018315_2	FBXW7_NM_018315_2	FBXW7_NM_018315_2
FEM1A	FEM1A	FEM1A
FETUB
FGFR3	FGFR3	FGFR3
FH	FH	FH
FOXD4	FOXD4	FOXD4
FOXD4_ENST00000382500	FOXD4_ENST00000382500	FOXD4_ENST00000382500
FOXG1	FOXG1	FOXG1
FOXI1	FOXI1	FOXI1
FOXL2	FOXL2	FOXL2
FOXP2	FOXP2	FOXP2
FOXP2_ENST00000393500	FOXP2_ENST00000393500	FOXP2_ENST00000393500
FOXP2_ENST00000403559	FOXP2_ENST00000403559	FOXP2_ENST00000403559
FUBP1_ENST00000370767	FUBP1_ENST00000370767	FUBP1_ENST00000370767
FUBP1_ENST00000370768	FUBP1_ENST00000370768	FUBP1_ENST00000370768
FUBP1_ENST00000436586	FUBP1_ENST00000436586	FUBP1_ENST00000436586
FUS	FUS	FUS
FUS_ENST00000254108	FUS_ENST00000254108	FUS_ENST00000254108
FUT1	FUT1	FUT1
FZD2	FZD2	FZD2
G6PD_ENST00000393562	G6PD_ENST00000393562	G6PD_ENST00000393562
GAA	GAA	GAA
GABRD	GABRD	GABRD
GCK_ENST00000395796	GCK_ENST00000395796	GCK_ENST00000395796
GDF6
GFPT2	GFPT2	GFPT2
GHSR_ENST00000427970
GIGYF2	GIGYF2	GIGYF2
GIGYF2_ENST00000409451	GIGYF2_ENST00000409451	GIGYF2_ENST00000409451
GIGYF2_ENST00000452341	GIGYF2_ENST00000452341	GIGYF2_ENST00000452341
GJA3	GJA3	GJA3
GJA8	GJA8	GJA8
GJB4	GJB4	GJB4
GNAS	GNAS	GNAS
GP1BA	GP1BA	GP1BA
GP5	GP5	GP5
GP5_ENST00000323007	GP5_ENST00000323007	GP5_ENST00000323007
GPR108	GPR108	GPR108
GPR26	GPR26	GPR26
GPR31	GPR31	GPR31
GPR77	GPR77	GPR77
GPR97	GPR97	GPR97
GRM6	GRM6	GRM6
GRPR	GRPR	GRPR
GSDMB	GSDMB	GSDMB
GSDMB_ENST00000418519
GTPBP5	GTPBP5	GTPBP5
GUF1
H3F3A	H3F3A	H3F3A
HAPLN3
HAPLN4	HAPLN4	HAPLN4
HCRTR1	HCRTR1	HCRTR1
HIAT1
HIC1	HIC1	HIC1
HIC1_ENST00000322941	HIC1_ENST00000322941	HIC1_ENST00000322941
HLA-A	HLA-A	HLA-A
HLA-A_ENST00000376806	HLA-A_ENST00000376806	HLA-A_ENST00000376806
HLA-B	HLA-B	HLA-B
HMMR
HNF1A
HNRNPL
HNRNPR	HNRNPR	HNRNPR
HNRPL
HNRPR	HNRPR	HNRPR
HOXA11	HOXA11	HOXA11
HOXD10	HOXD10	HOXD10
HOXD3	HOXD3	HOXD3
HRAS	HRAS	HRAS
HRAS_ENST00000397594	HRAS_ENST00000397594	HRAS_ENST00000397594
HS3ST3A1	HS3ST3A1	HS3ST3A1
HSD3B1	HSD3B1	HSD3B1
HSPA2	HSPA2	HSPA2
IDH1	IDH1	IDH1
IDH2	IDH2	IDH2
IFT57	IFT57	IFT57
IGF2BP2_ENST00000421047
IGSF21	IGSF21	IGSF21
IL12RB1	IL12RB1	IL12RB1
IL12RB1_ENST00000430026	IL12RB1_ENST00000430026	IL12RB1_ENST00000430026
IL12RB1_ENST00000593993	IL12RB1_ENST00000593993	IL12RB1_ENST00000593993
IMP5	IMP5	IMP5
ING1_ENST00000338450	ING1_ENST00000338450	ING1_ENST00000338450
IRF2BPL	IRF2BPL	IRF2BPL
IRF3	IRF3	IRF3
IRGQ	IRGQ	IRGQ
ITFG3_ENST00000450082	ITFG3_ENST00000450082	ITFG3_ENST00000450082
ITGA11	ITGA11	ITGA11
ITPRIP	ITPRIP	ITPRIP
IWS1	IWS1	IWS1
JAK1
JAK2	JAK2	JAK2
JAK3_ENST00000534444	JAK3_ENST00000534444	JAK3_ENST00000534444
KCNC1	KCNC1	KCNC1
KCNC1_ENST00000265969	KCNC1_ENST00000265969	KCNC1_ENST00000265969
KCNG1_ENST00000396017	KCNG1_ENST00000396017	KCNG1_ENST00000396017
KCNG4	KCNG4	KCNG4
KCNJ11	KCNJ11	KCNJ11
KCNJ5	KCNJ5	KCNJ5
KCNK3	KCNK3	KCNK3
KCNN2	KCNN2	KCNN2
KCNN2_ENST00000512097	KCNN2_ENST00000512097	KCNN2_ENST00000512097
KCNN4	KCNN4	KCNN4
KCNQ1_ENST00000335475	KCNQ1_ENST00000335475	KCNQ1_ENST00000335475
KCTD3
KDM6A	KDM6A	KDM6A
KDM6A_ENST00000377967	KDM6A_ENST00000377967	KDM6A_ENST00000377967
KDM6A_ENST00000382899	KDM6A_ENST00000382899	KDM6A_ENST00000382899
KEAP1	KEAP1	KEAP1
KIR3DL1_ENST00000402254	KIR3DL1_ENST00000402254	KIR3DL1_ENST00000402254
KLF3
KLHDC8A	KLHDC8A	KLHDC8A
KLHL14_ENST00000358095	KLHL14_ENST00000358095	KLHL14_ENST00000358095
KLHL23	KLHL23	KLHL23
KMT2C	KMT2C	KMT2C
KMT2D	KMT2D	KMT2D
KRAS	KRAS	KRAS
KRAS_ENST00000256078	KRAS_ENST00000256078	KRAS_ENST00000256078
KRT15	KRT15	KRT15
KRT82	KRT82	KRT82
KRT85	KRT85	KRT85
KRTAP27-1
KRTAP5-4	KRTAP5-4	KRTAP5-4
LARP4B
LARP7
LATS1_ENST00000253339	LATS1_ENST00000253339	LATS1_ENST00000253339
LATS1_ENST00000392273	LATS1_ENST00000392273	LATS1_ENST00000392273
LATS1_ENST00000543571	LATS1_ENST00000543571	LATS1_ENST00000543571
LCOR	LCOR	LCOR
LGR6_ENST00000255432	LGR6_ENST00000255432	LGR6_ENST00000255432
LGR6_ENST00000439764	LGR6_ENST00000439764	LGR6_ENST00000439764
LHFPL3	LHFPL3	LHFPL3
LHFPL3_ENST00000543266	LHFPL3_ENST00000543266	LHFPL3_ENST00000543266
LHFPL5	LHFPL5	LHFPL5
LIN54	LIN54	LIN54
LINC00273	LINC00273	LINC00273
LINC00273_ENST00000539813	LINC00273_ENST00000539813	LINC00273_ENST00000539813
LMAN1	LMAN1	LMAN1
LMX1B	LMX1B	LMX1B
LMX1B_ENST00000355497	LMX1B_ENST00000355497	LMX1B_ENST00000355497
LMX1B_ENST00000373474	LMX1B_ENST00000373474	LMX1B_ENST00000373474
LRRC33	LRRC33	LRRC33
LRRC8A	LRRC8A	LRRC8A
LRRD1	LRRD1	LRRD1
LRRTM2	LRRTM2	LRRTM2
LUC7L2	LUC7L2	LUC7L2
LUC7L2_ENST00000541170	LUC7L2_ENST00000541170	LUC7L2_ENST00000541170
MAML2
MAP2K1	MAP2K1	MAP2K1
MAP2K4	MAP2K4	MAP2K4
MAP3K1_ENST00000399503	MAP3K1_ENST00000399503	MAP3K1_ENST00000399503
MAP4K1_ENST00000396857	MAP4K1_ENST00000396857	MAP4K1_ENST00000396857
MAPK13	MAPK13	MAPK13
MATR3	MATR3	MATR3
MAX	MAX	MAX
MAX_ENST00000284165	MAX_ENST00000284165	MAX_ENST00000284165
MAX_ENST00000556979	MAX_ENST00000556979	MAX_ENST00000556979
MBD6
MCPH1_ENST00000344683
MDM2
MED12	MED12	MED12
MED12_ENST00000333646	MED12_ENST00000333646	MED12_ENST00000333646
MEN1	MEN1	MEN1
MESP2	MESP2	MESP2
MFAP3L	MFAP3L	MFAP3L
MGA	MGA	MGA
MLH1	MLH1	MLH1
MLL2_ENST00000301067	MLL2_ENST00000301067	MLL2_ENST00000301067
MLL3_ENST00000355193	MLL3_ENST00000355193	MLL3_ENST00000355193
MLLT3	MLLT3	MLLT3
MMP14	MMP14	MMP14
MOS	MOS	MOS
MRGPRX1	MRGPRX1	MRGPRX1
MSH2	MSH2	MSH2
MSH3
MSH3_ENST00000265081
MSH6	MSH6	MSH6
MSI1
MSL2	MSL2	MSL2
MSN	MSN	MSN
MTF2
MTNR1A	MTNR1A	MTNR1A
MVK
MXRA8
MYADM	MYADM	MYADM
MYCN	MYCN	MYCN
MYD88	MYD88	MYD88
NARFL	NARFL	NARFL
NBN
NCK2	NCK2	NCK2
NCK2_ENST00000233154	NCK2_ENST00000233154	NCK2_ENST00000233154
NCOR1	NCOR1	NCOR1
NCOR1_ENST00000436828	NCOR1_ENST00000436828	NCOR1_ENST00000436828
NDST1	NDST1	NDST1
NEK1_ENST00000507142
NEUROD6	NEUROD6	NEUROD6
NF1	NF1	NF1
NF1_ENST00000358273	NF1_ENST00000358273	NF1_ENST00000358273
NF1_ENST00000444181	NF1_ENST00000444181	NF1_ENST00000444181
NF2	NF2	NF2
NF2_ENST00000403999	NF2_ENST00000403999	NF2_ENST00000403999
NFE2L2	NFE2L2	NFE2L2
NGFR	NGFR	NGFR
NLRC3	NLRC3	NLRC3
NMUR2	NMUR2	NMUR2
NOVA1	NOVA1	NOVA1
NPIPL3	NPIPL3	NPIPL3
NPTX2	NPTX2	NPTX2
NRAS	NRAS	NRAS
NSUN6	NSUN6	NSUN6
NTNG2	NTNG2	NTNG2
NTNG2_ENST00000360670	NTNG2_ENST00000360670	NTNG2_ENST00000360670
NTNG2_ENST00000372179	NTNG2_ENST00000372179	NTNG2_ENST00000372179
NXN	NXN	NXN
OFD1
OLAH
OPRL1	OPRL1	OPRL1
OPTN
OR10G7	OR10G7	OR10G7
OR10G8	OR10G8	OR10G8
OR10H1	OR10H1	OR10H1
OR10H2	OR10H2	OR10H2
OR10P1	OR10P1	OR10P1
OR10R2
OR11G2	OR11G2	OR11G2
OR1C1	OR1C1	OR1C1
OR1F1	OR1F1	OR1F1
OR1G1	OR1G1	OR1G1
OR2A12	OR2A12	OR2A12
OR2A2	OR2A2	OR2A2
OR2A5	OR2A5	OR2A5
OR2B11	OR2B11	OR2B11
OR2C1	OR2C1	OR2C1
OR2J2
OR2L1P	OR2L1P	OR2L1P
OR2T34	OR2T34	OR2T34
OR2T4
OR2W3	OR2W3	OR2W3
OR3A4	OR3A4	OR3A4
OR4C3	OR4C3	OR4C3
OR4D1	OR4D1	OR4D1
OR4D9
OR4X2	OR4X2	OR4X2
OR5AK2	OR5AK2	OR5AK2
OR5AU1	OR5AU1	OR5AU1
OR5B2	OR5B2	OR5B2
OR5M10
OR6C65	OR6C65	OR6C65
OR6C75
OR6M1	OR6M1	OR6M1
OR8B12	OR8B12	OR8B12
OTX1	OTX1	OTX1
P2RY2	P2RY2	P2RY2
PACSIN2	PACSIN2	PACSIN2
PAOX_ENST00000357296	PAOX_ENST00000357296	PAOX_ENST00000357296
PAX6
PBRM1	PBRM1	PBRM1
PBRM1_ENST00000296302	PBRM1_ENST00000296302	PBRM1_ENST00000296302
PBRM1_ENST00000356770	PBRM1_ENST00000356770	PBRM1_ENST00000356770
PCDHA11	PCDHA11	PCDHA11
PCDHA11_ENST00000398640
PCDHA9	PCDHA9	PCDHA9
PCDHA9_ENST00000532602	PCDHA9_ENST00000532602	PCDHA9_ENST00000532602
PCDHB18	PCDHB18	PCDHB18
PCDHGA12	PCDHGA12	PCDHGA12
PCDHGA12_ENST00000252085	PCDHGA12_ENST00000252085	PCDHGA12_ENST00000252085
PCDHGA3	PCDHGA3	PCDHGA3
PCDHGA3_ENST00000253812	PCDHGA3_ENST00000253812	PCDHGA3_ENST00000253812
PCDHGA5	PCDHGA5	PCDHGA5
PCDHGA5_ENST00000518069	PCDHGA5_ENST00000518069	PCDHGA5_ENST00000518069
PCDHGA9	PCDHGA9	PCDHGA9
PCDHGA9_ENST00000573521	PCDHGA9_ENST00000573521	PCDHGA9_ENST00000573521
PCDHGB1	PCDHGB1	PCDHGB1
PCDHGB1_ENST00000523390	PCDHGB1_ENST00000523390	PCDHGB1_ENST00000523390
PDCD1
PDE6B	PDE6B	PDE6B
PDS5B
PGC	PGC	PGC
PHACTR4
PHF6	PHF6	PHF6
PHF6_ENST00000332070	PHF6_ENST00000332070	PHF6_ENST00000332070
PIGB
PIGG_ENST00000453061	PIGG_ENST00000453061	PIGG_ENST00000453061
PIK3C2G_ENST00000538779	PIK3C2G_ENST00000538779	PIK3C2G_ENST00000538779
PIK3CA	PIK3CA	PIK3CA
PIK3CA_ENST00000263967	PIK3CA_ENST00000263967	PIK3CA_ENST00000263967
PIK3R1	PIK3R1	PIK3R1
PIK3R1_ENST00000320694	PIK3R1_ENST00000320694	PIK3R1_ENST00000320694
PIK3R1_ENST00000336483	PIK3R1_ENST00000336483	PIK3R1_ENST00000336483
PIK3R3	PIK3R3	PIK3R3
PIK3R3_ENST00000540385	PIK3R3_ENST00000540385	PIK3R3_ENST00000540385
PLBD2	PLBD2	PLBD2
PLEKHA6
PLUNC	PLUNC	PLUNC
PNCK_ENST00000370145	PNCK_ENST00000370145	PNCK_ENST00000370145
PNCK_ENST00000393831	PNCK_ENST00000393831	PNCK_ENST00000393831
PNCK_ENST00000447676	PNCK_ENST00000447676	PNCK_ENST00000447676
PNISR	PNISR	PNISR
PNKP	PNKP	PNKP
PNKP_ENST00000322344	PNKP_ENST00000322344	PNKP_ENST00000322344
PNMAL2_ENST00000599531	PNMAL2_ENST00000599531	PNMAL2_ENST00000599531
POLM
PPM1D	PPM1D	PPM1D
PPP2R3B	PPP2R3B	PPP2R3B
PPP2R3B_ENST00000390665	PPP2R3B_ENST00000390665	PPP2R3B_ENST00000390665
PPP6C	PPP6C	PPP6C
PPP6C_ENST00000451402	PPP6C_ENST00000451402	PPP6C_ENST00000451402
PRAM1	PRAM1	PRAM1
PRAMEF2	PRAMEF2	PRAMEF2
PRB3	PRB3	PRB3
PRB3_ENST00000538488	PRB3_ENST00000538488	PRB3_ENST00000538488
PRF1	PRF1	PRF1
PRKACG	PRKACG	PRKACG
PRLHR	PRLHR	PRLHR
PROM2	PROM2	PROM2
PRR23C	PRR23C	PRR23C
PRR5	PRR5	PRR5
PRR5_ENST00000403581	PRR5_ENST00000403581	PRR5_ENST00000403581
PRR5-ARHGAP8	PRR5-ARHGAP8	PRR5-ARHGAP8
PRRT2
PRSS38	PRSS38	PRSS38
PSAPL1_ENST00000319098	PSAPL1_ENST00000319098	PSAPL1_ENST00000319098
PSEN2	PSEN2	PSEN2
PSIP1_ENST00000380733	PSIP1_ENST00000380733	PSIP1_ENST00000380733
PTCH1	PTCH1	PTCH1
PTCH1_ENST00000331920
PTCH1_ENST00000375274
PTCH1_ENST00000430669
PTEN	PTEN	PTEN
PTPN11	PTPN11	PTPN11
PTPRS_ENST00000262963	PTPRS_ENST00000262963	PTPRS_ENST00000262963
PUF60	PUF60	PUF60
PUS7
QKI
QKI_ENST00000275262
QKI_ENST00000392127
QKI_ENST00000453779
QSOX1	QSOX1	QSOX1
RAC1	RAC1	RAC1
RAD50	RAD50	RAD50
RAD50_ENST00000265335	RAD50_ENST00000265335	RAD50_ENST00000265335
RASA1	RASA1	RASA1
RASA1_ENST00000456692	RASA1_ENST00000456692	RASA1_ENST00000456692
RB1	RB1	RB1
RB1_ENST00000267163	RB1_ENST00000267163	RB1_ENST00000267163
RBM10	RBM10	RBM10
RBM27
RBM4	RBM4	RBM4
RBM45
RBM6
RDBP
RFX5
RGR	RGR	RGR
RHO	RHO	RHO
RHOA	RHOA	RHOA
RIT1	RIT1	RIT1
RNF128_ENST00000324342
RNF26
RNF43	RNF43	RNF43
RNF6	RNF6	RNF6
RP11-368J21.2	RP11-368J21.2	RP11-368J21.2
RP11-368J21.2_ENST00000424340	RP11-368J21.2_ENST00000424340	RP11-368J21.2_ENST00000424340
RP3-402G11_5	RP3-402G11_5	RP3-402G11_5
RPL22
RPN2	RPN2	RPN2
RPS6KL1	RPS6KL1	RPS6KL1
RTDR1	RTDR1	RTDR1
RTKN2
RTN4_ENST00000337526
RTN4RL1	RTN4RL1	RTN4RL1
RUFY2
RUNX1_ENST00000325074	RUNX1_ENST00000325074	RUNX1_ENST00000325074
RUNX1_ENST00000344691	RUNX1_ENST00000344691	RUNX1_ENST00000344691
RUNX1_ENST00000486278	RUNX1_ENST00000486278	RUNX1_ENST00000486278
RUNX2	RUNX2	RUNX2
RUNX2_ENST00000352853	RUNX2_ENST00000352853	RUNX2_ENST00000352853
S1PR3	S1PR3	S1PR3
S1PR5	S1PR5	S1PR5
SARDH	SARDH	SARDH
SARDH_ENST00000371868	SARDH_ENST00000371868	SARDH_ENST00000371868
SBK1_ENST00000341901	SBK1_ENST00000341901	SBK1_ENST00000341901
SCAF4
SCLT1
SCLT1_ENST00000281142
SEC14L4	SEC14L4	SEC14L4
SEC31A_ENST00000395310
SEC31A_ENST00000432794
SEC63
SENP6	SENP6	SENP6
SERPINA5	SERPINA5	SERPINA5
SERPINA6	SERPINA6	SERPINA6
SERPINA6_ENST00000341584
SERPINB10
SETD2	SETD2	SETD2
SETD2_ENST00000409792	SETD2_ENST00000409792	SETD2_ENST00000409792
SF3B1	SF3B1	SF3B1
SH3BP2
SHANK3_ENST00000445220
SIX6	SIX6	SIX6
SKOR2	SKOR2	SKOR2
SLC13A3_ENST00000372121	SLC13A3_ENST00000372121	SLC13A3_ENST00000372121
SLC16A1
SLC16A3	SLC16A3	SLC16A3
SLC18A3	SLC18A3	SLC18A3
SLC19A3
SLC1A7	SLC1A7	SLC1A7
SLC20A2	SLC20A2	SLC20A2
SLC22A11	SLC22A11	SLC22A11
SLC22A14	SLC22A14	SLC22A14
SLC22A4
SLC23A2
SLC24A3	SLC24A3	SLC24A3
SLC25A6	SLC25A6	SLC25A6
SLC26A6	SLC26A6	SLC26A6
SLC26A6_ENST00000383733	SLC26A6_ENST00000383733	SLC26A6_ENST00000383733
SLC27A3
SLC28A1_ENST00000537624	SLC28A1_ENST00000537624	SLC28A1_ENST00000537624
SLC2A1	SLC2A1	SLC2A1
SLC2A8	SLC2A8	SLC2A8
SLC34A2	SLC34A2	SLC34A2
SLC35F3	SLC35F3	SLC35F3
SLC35F5
SLC39A4_ENST00000276833	SLC39A4_ENST00000276833	SLC39A4_ENST00000276833
SLC3A2
SLC41A1	SLC41A1	SLC41A1
SLC45A1	SLC45A1	SLC45A1
SLC45A1_ENST00000377479	SLC45A1_ENST00000377479	SLC45A1_ENST00000377479
SLC45A4	SLC45A4	SLC45A4
SLC45A4_ENST00000517878	SLC45A4_ENST00000517878	SLC45A4_ENST00000517878
SLC46A2	SLC46A2	SLC46A2
SLC47A1	SLC47A1	SLC47A1
SLC5A2	SLC5A2	SLC5A2
SLC6A18	SLC6A18	SLC6A18
SLC6A20	SLC6A20	SLC6A20
SLC6A20_ENST00000358525	SLC6A20_ENST00000358525	SLC6A20_ENST00000358525
SLC7A10	SLC7A10	SLC7A10
SLC8A3	SLC8A3	SLC8A3
SLC9A3	SLC9A3	SLC9A3
SLCO4A1	SLCO4A1	SLCO4A1
SLITRK1	SLITRK1	SLITRK1
SMAD2	SMAD2	SMAD2
SMAD2_ENST00000591214	SMAD2_ENST00000591214	SMAD2_ENST00000591214
SMAD4	SMAD4	SMAD4
SMAD4_ENST00000452201	SMAD4_ENST00000452201	SMAD4_ENST00000452201
SMAP1
SMARCB1	SMARCB1	SMARCB1
SMARCD2	SMARCD2	SMARCD2
SMARCD2_ENST00000323347	SMARCD2_ENST00000323347	SMARCD2_ENST00000323347
SMC6
SNX8	SNX8	SNX8
SOX1	SOX1	SOX1
SOX9	SOX9	SOX9
SP3_ENST00000310015	SP3_ENST00000310015	SP3_ENST00000310015
SPATA20	SPATA20	SPATA20
SPNS3
SPOP	SPOP	SPOP
SPRED1	SPRED1	SPRED1
SRSF2	SRSF2	SRSF2
SS18L1_ENST00000331758	SS18L1_ENST00000331758	SS18L1_ENST00000331758
SSTR5	SSTR5	SSTR5
ST3GAL1	ST3GAL1	ST3GAL1
ST8SIA5	ST8SIA5	ST8SIA5
STAG2	STAG2	STAG2
STAG2_ENST00000218089	STAG2_ENST00000218089	STAG2_ENST00000218089
STAMBPL1
STAMBPL1_ENST00000371927
STAU2
STAU2_ENST00000521210
STAU2_ENST00000524300
STC2	STC2	STC2
STEAP3_ENST00000393110	STEAP3_ENST00000393110	STEAP3_ENST00000393110
STEAP3_ENST00000409811	STEAP3_ENST00000409811	STEAP3_ENST00000409811
STK11	STK11	STK11
STK11_ENST00000326873	STK11_ENST00000326873	STK11_ENST00000326873
SUZ12	SUZ12	SUZ12
SYN1_ENST00000295987	SYN1_ENST00000295987	SYN1_ENST00000295987
SYT7	SYT7	SYT7
TACR1	TACR1	TACR1
TAF1B
TAP2_ENST00000374897	TAP2_ENST00000374897	TAP2_ENST00000374897
TAS2R1	TAS2R1	TAS2R1
TAS2R38	TAS2R38	TAS2R38
TBC1D23_ENST00000394144
TBC1D24	TBC1D24	TBC1D24
TBL1XR1	TBL1XR1	TBL1XR1
TBP	TBP	TBP
TBR1	TBR1	TBR1
TBX10	TBX10	TBX10
TBX19	TBX19	TBX19
TBXA2R	TBXA2R	TBXA2R
TBXA2R_ENST00000411851	TBXA2R_ENST00000411851	TBXA2R_ENST00000411851
TCEB3
TCF12	TCF12	TCF12
TCF12_ENST00000438423	TCF12_ENST00000438423	TCF12_ENST00000438423
TCF12_ENST00000452095	TCF12_ENST00000452095	TCF12_ENST00000452095
TCF7L2	TCF7L2	TCF7L2
TCF7L2_ENST00000352065	TCF7L2_ENST00000352065	TCF7L2_ENST00000352065
TCF7L2_ENST00000355717	TCF7L2_ENST00000355717	TCF7L2_ENST00000355717
TCF7L2_ENST00000543371	TCF7L2_ENST00000543371	TCF7L2_ENST00000543371
TEAD2
TET2	TET2	TET2
TET2_ENST00000305737	TET2_ENST00000305737	TET2_ENST00000305737
TFAP2D	TFAP2D	TFAP2D
TFE3_ENST00000336239
TGFBR1	TGFBR1	TGFBR1
TGFBR2	TGFBR2	TGFBR2
TGFBR2_ENST00000359013	TGFBR2_ENST00000359013	TGFBR2_ENST00000359013
TGIF1
TGIF2LX	TGIF2LX	TGIF2LX
THBD	THBD	THBD
TM9SF3
TMEM130	TMEM130	TMEM130
TMEM214	TMEM214	TMEM214
TMEM79	TMEM79	TMEM79
TMPO
TNK1	TNK1	TNK1
TNPO1
TP53	TP53	TP53
TP53_ENST00000269305	TP53_ENST00000269305	TP53_ENST00000269305
TP53_ENST00000413465	TP53_ENST00000413465	TP53_ENST00000413465
TP53_ENST00000414315	TP53_ENST00000414315	TP53_ENST00000414315
TP53_ENST00000420246	TP53_ENST00000420246	TP53_ENST00000420246
TP53_ENST00000455263	TP53_ENST00000455263	TP53_ENST00000455263
TP53_ENST00000545858	TP53_ENST00000545858	TP53_ENST00000545858
TRAM1L1
TRDN	TRDN	TRDN
TREML2	TREML2	TREML2
TRIB2	TRIB2	TRIB2
TRIM50	TRIM50	TRIM50
TRIM50_ENST00000333149	TRIM50_ENST00000333149	TRIM50_ENST00000333149
TRIO_ENST00000344135	TRIO_ENST00000344135	TRIO_ENST00000344135
TRPV1_ENST00000174621	TRPV1_ENST00000174621	TRPV1_ENST00000174621
TRPV4	TRPV4	TRPV4
TSC1	TSC1	TSC1
TSC1_ENST00000403810	TSC1_ENST00000403810	TSC1_ENST00000403810
TSC22D2	TSC22D2	TSC22D2
TSSK6	TSSK6	TSSK6
TTK
TTK_ENST00000369798
TTLL10
TTLL8
TTLL8_ENST00000440475	TTLL8_ENST00000440475	TTLL8_ENST00000440475
TUBB4	TUBB4	TUBB4
U2AF1	U2AF1	U2AF1
U2AF1_ENST00000380276	U2AF1_ENST00000380276	U2AF1_ENST00000380276
UBC	UBC	UBC
UPF3B	UPF3B	UPF3B
USP45	USP45	USP45
VHL	VHL	VHL
VIPR1	VIPR1	VIPR1
VSIG1	VSIG1	VSIG1
VSIG1_ENST00000415430	VSIG1_ENST00000415430	VSIG1_ENST00000415430
VSIG1_ENST00000444426	VSIG1_ENST00000444426	VSIG1_ENST00000444426
WDR18	WDR18	WDR18
WDR20_ENST00000454394	WDR20_ENST00000454394	WDR20_ENST00000454394
WDR47
WNT16
WNT16_ENST00000361301
WNT5B_ENST00000397196	WNT5B_ENST00000397196	WNT5B_ENST00000397196
WT1	WT1	WT1
WT1_ENST00000332351	WT1_ENST00000332351	WT1_ENST00000332351
WT1_ENST00000379079	WT1_ENST00000379079	WT1_ENST00000379079
XYLT2
YAP1	YAP1	YAP1
YAP1_ENST00000282441	YAP1_ENST00000282441	YAP1_ENST00000282441
YLPM1	YLPM1	YLPM1
YLPM1_ENST00000325680	YLPM1_ENST00000325680	YLPM1_ENST00000325680
YTHDF3	YTHDF3	YTHDF3
ZAN_ENST00000546213	ZAN_ENST00000546213	ZAN_ENST00000546213
ZBTB26	ZBTB26	ZBTB26
ZC3H13	ZC3H13	ZC3H13
ZC3H18
ZDHHC8
ZDHHC8_ENST00000405930
ZFP36L2
ZFP37
ZNF135	ZNF135	ZNF135
ZNF135_ENST00000401053	ZNF135_ENST00000401053	ZNF135_ENST00000401053
ZNF14	ZNF14	ZNF14
ZNF207
ZNF224
ZNF233
ZNF276	ZNF276	ZNF276
ZNF276_ENST00000443381	ZNF276_ENST00000443381	ZNF276_ENST00000443381
ZNF319	ZNF319	ZNF319
ZNF384_ENST00000361959	ZNF384_ENST00000361959	ZNF384_ENST00000361959
ZNF503	ZNF503	ZNF503
ZNF517	ZNF517	ZNF517
ZNF629	ZNF629	ZNF629
ZNF71	ZNF71	ZNF71
ZNF730	ZNF730	ZNF730
ZNF750	ZNF750	ZNF750
ZNF813	ZNF813	ZNF813
ZNF92	ZNF92	ZNF92
ZNRF4	ZNRF4	ZNRF4
ZRSR2	ZRSR2	ZRSR2
ZSCAN2
	ACAP2
	AHCTF1_ENST00000326225
	AP1M1
	ARHGAP35
	ARID1B
	ASXL2
	ASXL2_ENST00000435504
	ATG14
	BCOR_ENST00000378444
	BCOR_ENST00000378463
	C15orf33
	C8orf45
	CCDC14_ENST00000488653
	CCDC82
	CCND3
	CDCA7L
	CEP135
	CEP290_ENST00000309041
	CEP95
	CEP95_ENST00000556440
	CFI
	CHST4
	CHUK
	COLQ
	COLQ_ENST00000383781
	COLQ_ENST00000435459
	CPA6_ENST00000518549
	CREBBP
	CYLD_ENST00000427738
	FAS
	FAT
	FCN2
	GGN
	GRLF1
	GRLF1_ENST00000317082
	GSK3B_ENST00000316626
	HOXB3
	ING1
	ING1_ENST00000375774
	KCNQ1
	KLRAQ1
	LRRC14B
	LUC7L2_ENST00000263545
	LUZP4
	MAN1A2
	MORC4
	MRGPRD
	MTMR2
	MTMR2_ENST00000346299
	NAA15
	NCOR1_ENST00000395851
	NOTCH1
	NOTCH1_ENST00000277541
	OR2Y1
	PPP1R21
	PRKAR1B
	PTPN2
	PTX4
	RAD21
	RAD54B
	RBBP5
	RBM46
	RBPJ
	RBPJ_ENST00000348160
	RNF111
	RTKN2_ENST00000395265
	SAMSN1_ENST00000285670
	SENP6_ENST00000370014
	SIN3A
	SLC12A7
	SLC16A12_ENST00000371790
	SMARCD1
	SMC5
	SPATA17
	TMEM232_ENST00000455884
	TNRC6B_ENST00000301923
	TNRC6B_ENST00000454349
	TRIM22
	UPF3A
	USP28
	USP43
	WDR1_ENST00000499869
	ZC3H13_ENST00000242848
	ZNF292
	ZNF292_ENST00000369577
	ZNF323
	ZNF548_ENST00000336128
	ZNRF3
	ZNRF3_ENST00000544604
