# Supplementary material for: Use of signals of positive and negative selection to distinguish cancer genes and passenger genes
Source: eLife. 2021 Jan 11;10:e59629. doi: 10.7554/eLife.59629 (PMC7877913; doi:10.7554/eLife.59629)
Supplement: Supplementary file 31. — Transcripts of OGs (oncogenes) and TSGs (tumor suppressor genes) of the cancer gene list of Vogelstein et al., 2013 are highlighted by brick red and blue backgrounds, respectively. Transcripts of CGC (Cancer Gene Census) genes (Sondka et al., 2018) that do not correspond to OGs or TSGs of the cancer gene list of Vogelstein et al., 2013 are highlighted by yellow background. [file elife-59629-supp31.xlsx]

## Sheet: CG_SO lists
Gene symbol (1158)	CG_SOf_2SD	fS	fM	fN	CG_SOr2_2SD	rSM	rNM	rNS	CG_SOr3_2SD	rSMN	rMSN	rNSM
ABCB8_ENST00000356058	ABCB8_ENST00000356058	0.37	0.6	0.03	ABCB8_ENST00000356058	0.616667	0.0810811	0.0810811	ABCB8_ENST00000356058	0.587302	1.5	0.0309278
ABCG8	ABCG8	0.374429	0.584475	0.0410959	ABCG8	0.640625	0.109756	0.109756	ABCG8	0.59854	1.40659	0.0428571
ACAP2	ACAP2	0.208333	0.659722	0.131944	ACAP2	0.315789	0.633333	0.633333	ACAP2	0.263158	1.93878	0.152
ACKR3	ACKR3	0.369048	0.619048	0.0119048	ACKR3	0.596154	0.0322581	0.0322581	ACKR3	0.584906	1.625	0.0120482
ACRBP	ACRBP	0.335938	0.578125	0.0859375
ACTA1	ACTA1	0.370861	0.615894	0.013245	ACTA1	0.602151	0.0357143	0.0357143	ACTA1	0.589474	1.60345	0.0134228
ACTL9									ACTL9	0.572368	1.65556	0.0127119
ACVR1B	ACVR1B	0.114754	0.797814	0.0874317
ACVR1B_ENST00000541224	ACVR1B_ENST00000541224	0.104803	0.742358	0.152838	ACVR1B_ENST00000541224	0.141176	1.45833	1.45833	ACVR1B_ENST00000541224	0.117073	2.88136	0.180412
ACVR2A	ACVR2A	0.126582	0.687764	0.185654	ACVR2A	0.184049	1.46667	1.46667	ACVR2A	0.144928	2.2027	0.227979
ADAM10	ADAM10	0.153846	0.825175	0.020979
ADD1_ENST00000398125					ADD1_ENST00000398125	0.589041	0.139535	0.139535
ADRA1A_ENST00000358857	ADRA1A_ENST00000358857	0.368852	0.581967	0.0491803	ADRA1A_ENST00000358857	0.633803	0.133333	0.133333	ADRA1A_ENST00000358857	0.584416	1.39216	0.0517241
ADRA1A_ENST00000380572	ADRA1A_ENST00000380572	0.366667	0.591667	0.0416667	ADRA1A_ENST00000380572	0.619718	0.113636	0.113636	ADRA1A_ENST00000380572	0.578947	1.44898	0.0434783
ADRA1B	ADRA1B	0.422018	0.577982	0	ADRA1B	0.730159	0	0	ADRA1B	0.730159	1.36957	0
AFP	AFP	0.14876	0.826446	0.0247934
AGAP6	AGAP6	0.117117	0.81982	0.0630631
AGBL3	AGBL3	0.0944882	0.732283	0.173228	AGBL3	0.129032	1.83333	1.83333	AGBL3	0.104348	2.73529	0.209524
AGBL3_ENST00000458078	AGBL3_ENST00000458078	0.103448	0.724138	0.172414	AGBL3_ENST00000458078	0.142857	1.66667	1.66667	AGBL3_ENST00000458078	0.115385	2.625	0.208333
AGTPBP1_ENST00000376109	AGTPBP1_ENST00000376109	0.0840336	0.823529	0.092437	AGTPBP1_ENST00000376109	0.102041	1.1	1.1	AGTPBP1_ENST00000376109	0.0917431	4.66667	0.101852
AHCTF1	AHCTF1	0.196078	0.691176	0.112745
AHCTF1_ENST00000326225	AHCTF1_ENST00000326225	0.174825	0.685315	0.13986	AHCTF1_ENST00000326225	0.255102	0.8	0.8	AHCTF1_ENST00000326225	0.211864	2.17778	0.162602
AKT1	AKT1	0.0667976	0.923379	0.00982318	AKT1	0.0723404	0.147059	0.147059	AKT1	0.0715789	12.0513	0.00992063
ALK	ALK	0.141423	0.82208	0.0364964
ALPL					ALPL	0.594595	0.0606061	0.0606061	ALPL	0.573913	1.58571	0.0225989
AMDHD2_ENST00000413459					AMDHD2_ENST00000413459	0.596774	0.108108	0.108108	AMDHD2_ENST00000413459	0.560606	1.5122	0.040404
AMER1	AMER1	0.0856611	0.582868	0.331471	AMER1	0.146965	3.86957	3.86957	AMER1	0.0936864	1.39732	0.495822
AMIGO3	AMIGO3	0.392405	0.588608	0.0189873	AMIGO3	0.666667	0.0483871	0.0483871	AMIGO3	0.645833	1.43077	0.0193548
ANGPTL2	ANGPTL2	0.363636	0.553719	0.0826446	ANGPTL2	0.656716	0.227273	0.227273	ANGPTL2	0.571429	1.24074	0.0900901
ANKMY1_ENST00000361678	ANKMY1_ENST00000361678	0.350282	0.587571	0.0621469	ANKMY1_ENST00000361678	0.596154	0.177419	0.177419
ANKMY1_ENST00000405523	ANKMY1_ENST00000405523	0.379845	0.542636	0.0775194	ANKMY1_ENST00000405523	0.7	0.204082	0.204082	ANKMY1_ENST00000405523	0.6125	1.18644	0.0840336
ANKRD31_ENST00000274361	ANKRD31_ENST00000274361	0.10989	0.802198	0.0879121
ANKRD33	ANKRD33	0.349593	0.593496	0.0569106	ANKRD33	0.589041	0.162791	0.162791
ANKRD34C	ANKRD34C	0.327731	0.596639	0.0756303
ANKRD56	ANKRD56	0.139344	0.836066	0.0245902
ANKS3	ANKS3	0.37037	0.564815	0.0648148	ANKS3	0.655738	0.175	0.175	ANKS3	0.588235	1.29787	0.0693069
AP1B1	AP1B1	0.373134	0.606965	0.0199005	AP1B1	0.614754	0.0533333	0.0533333	AP1B1	0.595238	1.5443	0.0203046
AP1B1_ENST00000415447	AP1B1_ENST00000415447	0.413978	0.564516	0.0215054	AP1B1_ENST00000415447	0.733333	0.0519481	0.0519481	AP1B1_ENST00000415447	0.706422	1.2963	0.021978
AP1M1	AP1M1	0.376147	0.605505	0.0183486	AP1M1	0.621212	0.0487805	0.0487805	AP1M1	0.602941	1.53488	0.0186916
APC	APC	0.0392203	0.249178	0.711602	APC	0.157399	18.1437	18.1437	APC	0.0408213	0.331874	2.46743
AQP7	AQP7	0.370629	0.622378	0.00699301	AQP7	0.595506	0.0188679	0.0188679	AQP7	0.588889	1.64815	0.00704225
AQP7_ENST00000539936									AQP7_ENST00000539936	0.570621	1.75248	0
AR_ENST00000396043	AR_ENST00000396043	0.0421941	0.894515	0.0632911	AR_ENST00000396043	0.0471698	1.5	1.5	AR_ENST00000396043	0.0440529	8.48	0.0675676
ARHGAP11A	ARHGAP11A	0.115942	0.826087	0.057971
ARHGAP35	ARHGAP35	0.192308	0.674556	0.133136	ARHGAP35	0.285088	0.692308	0.692308	ARHGAP35	0.238095	2.07273	0.153584
ARHGEF16					ARHGEF16	0.592593	0.0416667	0.0416667	ARHGEF16	0.578313	1.62	0.0155039
ARID1A	ARID1A	0.0541327	0.474971	0.470896	ARID1A	0.113971	8.69892	8.69892	ARID1A	0.0572308	0.904656	0.889989
ARID1B	ARID1B	0.152828	0.712395	0.134777	ARID1B	0.214527	0.88189	0.88189	ARID1B	0.180398	2.47699	0.155772
ARID1B_ENST00000346085	ARID1B_ENST00000346085	0.142322	0.732834	0.124844
ARID2	ARID2	0.0856574	0.609562	0.304781	ARID2	0.140523	3.55814	3.55814	ARID2	0.0936819	1.56122	0.438395
ARID5A	ARID5A	0.356522	0.591304	0.0521739	ARID5A	0.602941	0.146341	0.146341
ARMC6_ENST00000535612	ARMC6_ENST00000535612	0.333333	0.590476	0.0761905
ASMTL	ASMTL	0.371429	0.617143	0.0114286	ASMTL	0.601852	0.0307692	0.0307692	ASMTL	0.590909	1.61194	0.0115607
ASMTL_ENST00000381317	ASMTL_ENST00000381317	0.37037	0.617284	0.0123457	ASMTL_ENST00000381317	0.6	0.0333333	0.0333333	ASMTL_ENST00000381317	0.588235	1.6129	0.0125
ASXL1	ASXL1	0.121298	0.619182	0.25952	ASXL1	0.1959	2.13953	2.13953	ASXL1	0.138042	1.62593	0.350476
ASXL1_ENST00000306058	ASXL1_ENST00000306058	0.126214	0.642395	0.231392	ASXL1_ENST00000306058	0.196474	1.83333	1.83333	ASXL1_ENST00000306058	0.144444	1.79638	0.301053
ASXL2	ASXL2	0.135977	0.711048	0.152975	ASXL2	0.191235	1.125	1.125	ASXL2	0.157377	2.46078	0.180602
ASXL2_ENST00000435504	ASXL2_ENST00000435504	0.123134	0.729478	0.147388	ASXL2_ENST00000435504	0.168798	1.19697	1.19697	ASXL2_ENST00000435504	0.140426	2.69655	0.172867
ATF6	ATF6	0.221429	0.664286	0.114286
ATF7IP	ATF7IP	0.19802	0.689769	0.112211
ATG14	ATG14	0.153846	0.711538	0.134615	ATG14	0.216216	0.875	0.875	ATG14	0.181818	2.46667	0.155556
ATHL1									ATHL1	0.564103	1.71111	0.00826446
ATM	ATM	0.0673317	0.772444	0.160224	ATM	0.0871671	2.37963	2.37963	ATM	0.0721925	3.39452	0.190794
ATM_ENST00000278616	ATM_ENST00000278616	0.0661818	0.769455	0.164364	ATM_ENST00000278616	0.0860113	2.48352	2.48352	ATM_ENST00000278616	0.0708723	3.33754	0.196693
ATP2B3									ATP2B3	0.5625	1.64085	0.0190217
ATP2B3_ENST00000370186									ATP2B3_ENST00000370186	0.565401	1.63121	0.0192308
ATR	ATR	0.114943	0.804598	0.0804598
ATRX	ATRX	0.0777027	0.723818	0.19848	ATRX	0.107351	2.55435	2.55435	ATRX	0.0842491	2.6208	0.247629
ATRX_ENST00000373344	ATRX_ENST00000373344	0.0786219	0.726148	0.19523	ATRX_ENST00000373344	0.108273	2.48315	2.48315	ATRX_ENST00000373344	0.0853308	2.65161	0.242591
AURKA	AURKA	0.100629	0.798742	0.100629
AXIN1	AXIN1	0.109091	0.66	0.230909	AXIN1	0.165289	2.11667	2.11667	AXIN1	0.122449	1.94118	0.300236
AXL	AXL	0.149893	0.826552	0.0235546
B2M	B2M	0.0628019	0.68599	0.251208	B2M	0.0915493	4	4	B2M	0.0670103	2.18462	0.335484
B2M_ENST00000544417	B2M_ENST00000544417	0.0941176	0.688235	0.217647	B2M_ENST00000544417	0.136752	2.3125	2.3125	B2M_ENST00000544417	0.103896	2.20755	0.278195
B3GALT1	B3GALT1	0.210526	0.559211	0.230263	B3GALT1	0.376471	1.09375	1.09375	B3GALT1	0.266667	1.26866	0.299145
BAP1	BAP1	0.0681818	0.673077	0.258741	BAP1	0.101299	3.79487	3.79487	BAP1	0.0731707	2.05882	0.349057
BARD1	BARD1	0.111111	0.831276	0.0576132
BARD1_ENST00000260947	BARD1_ENST00000260947	0.114894	0.829787	0.0553191
BARHL2	BARHL2	0.37037	0.614815	0.0148148	BARHL2	0.60241	0.04	0.04	BARHL2	0.588235	1.59615	0.0150376
BCL11A									BCL11A	0.573643	1.67105	0.00995025
BCL11A_ENST00000356842	BCL11A_ENST00000356842	0.376289	0.613402	0.0103093	BCL11A_ENST00000356842	0.613445	0.0273973	0.0273973	BCL11A_ENST00000356842	0.603306	1.58667	0.0104167
BCL6	BCL6	0.133117	0.834416	0.0324675
BCMO1	BCMO1	0.358108	0.594595	0.0472973	BCMO1	0.602273	0.132075	0.132075	BCMO1	0.557895	1.46667	0.0496454
BCOR	BCOR	0.162162	0.691323	0.146515	BCOR	0.234568	0.903509	0.903509	BCOR	0.193548	2.23963	0.171667
BCOR_ENST00000378444	BCOR_ENST00000378444	0.160584	0.70073	0.138686	BCOR_ENST00000378444	0.229167	0.863636	0.863636	BCOR_ENST00000378444	0.191304	2.34146	0.161017
BCOR_ENST00000378463	BCOR_ENST00000378463	0.133574	0.732852	0.133574	BCOR_ENST00000378463	0.182266	1	1	BCOR_ENST00000378463	0.154167	2.74324	0.154167
BDKRB1	BDKRB1	0.336538	0.596154	0.0673077
BDKRB2	BDKRB2	0.37415	0.564626	0.0612245	BDKRB2	0.662651	0.163636	0.163636	BDKRB2	0.597826	1.29687	0.0652174
BICC1_ENST00000263103	BICC1_ENST00000263103	0.137931	0.82069	0.0413793
BIN1	BIN1	0.360656	0.581967	0.057377	BIN1	0.619718	0.159091	0.159091	BIN1	0.564103	1.39216	0.0608696
BIN2	BIN2	0.242604	0.639053	0.118343	BIN2	0.37963	0.487805	0.487805
BIRC3	BIRC3	0.0939227	0.812155	0.0939227	BIRC3	0.115646	1	1	BIRC3	0.103659	4.32353	0.103659
BMPR2	BMPR2	0.170833	0.675	0.154167	BMPR2	0.253086	0.902439	0.902439	BMPR2	0.20603	2.07692	0.182266
BPI	BPI	0.359281	0.586826	0.0538922	BPI	0.612245	0.15	0.15	BPI	0.560748	1.42029	0.056962
BRAF	BRAF	0.0147293	0.980494	0.00477707	BRAF	0.0150223	0.324324	0.324324	BRAF	0.0149495	50.2653	0.0048
BRCA1	BRCA1	0.107937	0.798413	0.0936508
BRCA1_ENST00000471181	BRCA1_ENST00000471181	0.112745	0.808824	0.0784314
BRCA2	BRCA2	0.106667	0.792889	0.100444
BRCA2_ENST00000544455	BRCA2_ENST00000544455	0.108133	0.797597	0.0942699
BRD7	BRD7	0.179641	0.60479	0.215569	BRD7	0.29703	1.2	1.2	BRD7	0.218978	1.5303	0.274809
BRIP1	BRIP1	0.106329	0.837975	0.0556962
BRIP1_ENST00000259008	BRIP1_ENST00000259008	0.108808	0.836788	0.0544041
BTBD17	BTBD17	0.370968	0.620968	0.00806452	BTBD17	0.597403	0.0217391	0.0217391	BTBD17	0.589744	1.6383	0.00813008
BTN3A1	BTN3A1	0.384615	0.57265	0.042735	BTN3A1	0.671642	0.111111	0.111111	BTN3A1	0.625	1.34	0.0446429
BTNL3	BTNL3	0.167832	0.825175	0.00699301
C12orf26	C12orf26	0.11465	0.815287	0.0700637
C12orf4	C12orf4	0.201923	0.682692	0.115385
C14orf43	C14orf43	0.251121	0.636771	0.112108
C15orf27	C15orf27	0.393701	0.598425	0.00787402	C15orf27	0.657895	0.02	0.02	C15orf27	0.649351	1.4902	0.00793651
C15orf33	C15orf33	0.198758	0.670807	0.130435	C15orf33	0.296296	0.65625	0.65625	C15orf33	0.248062	2.03774	0.15
C17orf28					C17orf28	0.607477	0.0769231	0.0769231	C17orf28	0.580357	1.52857	0.0290698
C17orf63	C17orf63	0.471014	0.485507	0.0434783	C17orf63	0.970149	0.0923077	0.0923077	C17orf63	0.890411	0.943662	0.0454545
C17orf63_ENST00000341217	C17orf63_ENST00000341217	0.459854	0.49635	0.0437956	C17orf63_ENST00000341217	0.926471	0.0952381	0.0952381	C17orf63_ENST00000341217	0.851351	0.985507	0.0458015
C17orf70	C17orf70	0.395722	0.593583	0.0106952	C17orf70	0.666667	0.027027	0.027027	C17orf70	0.654867	1.46053	0.0108108
C17orf70_ENST00000327787	C17orf70_ENST00000327787	0.387255	0.598039	0.0147059	C17orf70_ENST00000327787	0.647541	0.0379747	0.0379747	C17orf70_ENST00000327787	0.632	1.4878	0.0149254
C7orf72	C7orf72	0.0980392	0.862745	0.0392157	C7orf72	0.113636	0.4	0.4
C8orf45	C8orf45	0.0948905	0.832117	0.0729927	C8orf45	0.114035	0.769231	0.769231	C8orf45	0.104839	4.95652	0.0787402
CACNB1	CACNB1	0.385321	0.559633	0.0550459	CACNB1	0.688525	0.142857	0.142857	CACNB1	0.626866	1.27083	0.0582524
CACNG2	CACNG2	0.438017	0.495868	0.0661157	CACNG2	0.883333	0.150943	0.150943	CACNG2	0.779412	0.983607	0.0707965
CACNG5									CACNG5	0.567568	1.63636	0.0175439
CALB2	CALB2	0.383178	0.588785	0.0280374	CALB2	0.650794	0.0731707	0.0731707	CALB2	0.621212	1.43182	0.0288462
CaMK1b	CaMK1b	0.407407	0.583333	0.00925926	CaMK1b	0.698413	0.0227273	0.0227273	CaMK1b	0.6875	1.4	0.00934579
CAPN7	CAPN7	0.126866	0.761194	0.11194
CAPS2_ENST00000409445	CAPS2_ENST00000409445	0.113043	0.817391	0.0695652
CAPZA3	CAPZA3	0.190789	0.684211	0.125	CAPZA3	0.278846	0.655172	0.655172
CARD9_ENST00000371734					CARD9_ENST00000371734	0.597561	0.122449	0.122449	CARD9_ENST00000371734	0.556818	1.49091	0.0458015
CASD1	CASD1	0.157303	0.820225	0.0224719
CASP8	CASP8	0.056338	0.711268	0.232394	CASP8	0.0792079	4.125	4.125	CASP8	0.0597015	2.46341	0.302752
CASP8_ENST00000264275	CASP8_ENST00000264275	0.0522193	0.715405	0.232376	CASP8_ENST00000264275	0.0729927	4.45	4.45	CASP8_ENST00000264275	0.0550964	2.51376	0.302721
CASP8_ENST00000358485	CASP8_ENST00000358485	0.047619	0.72381	0.228571	CASP8_ENST00000358485	0.0657895	4.8	4.8	CASP8_ENST00000358485	0.05	2.62069	0.296296
CBFB_ENST00000290858	CBFB_ENST00000290858	0.0956522	0.678261	0.226087	CBFB_ENST00000290858	0.141026	2.36364	2.36364	CBFB_ENST00000290858	0.105769	2.10811	0.292135
CBFB_ENST00000412916	CBFB_ENST00000412916	0.08	0.688	0.232	CBFB_ENST00000412916	0.116279	2.9	2.9	CBFB_ENST00000412916	0.0869565	2.20513	0.302083
CBLN4	CBLN4	0.368932	0.621359	0.00970874	CBLN4	0.59375	0.0263158	0.0263158	CBLN4	0.584615	1.64103	0.00980392
CBX6	CBX6	0.388889	0.611111	0	CBX6	0.636364	0	0	CBX6	0.636364	1.57143	0
CCAR1	CCAR1	0.122807	0.75	0.127193
CCDC102B_ENST00000584156	CCDC102B_ENST00000584156	0.185185	0.697531	0.117284
CCDC116	CCDC116	0.373418	0.620253	0.00632911	CCDC116	0.602041	0.0169492	0.0169492	CCDC116	0.59596	1.63333	0.00636943
CCDC14	CCDC14	0.23741	0.640288	0.122302	CCDC14	0.370787	0.515152	0.515152
CCDC14_ENST00000488653	CCDC14_ENST00000488653	0.221591	0.647727	0.130682	CCDC14_ENST00000488653	0.342105	0.589744	0.589744	CCDC14_ENST00000488653	0.284672	1.83871	0.150327
CCDC35	CCDC35	0.147541	0.827869	0.0245902
CCDC41	CCDC41	0.147541	0.680328	0.172131	CCDC41	0.216867	1.16667	1.16667	CCDC41	0.173077	2.12821	0.207921
CCDC6	CCDC6	0.144231	0.740385	0.115385
CCDC66	CCDC66	0.111111	0.709402	0.179487	CCDC66	0.156627	1.61538	1.61538	CCDC66	0.125	2.44118	0.21875
CCDC66_ENST00000394672	CCDC66_ENST00000394672	0.107438	0.735537	0.157025	CCDC66_ENST00000394672	0.146067	1.46154	1.46154	CCDC66_ENST00000394672	0.12037	2.78125	0.186275
CCDC66_ENST00000436465	CCDC66_ENST00000436465	0.105263	0.72807	0.166667	CCDC66_ENST00000436465	0.144578	1.58333	1.58333	CCDC66_ENST00000436465	0.117647	2.67742	0.2
CCDC82	CCDC82	0.171171	0.684685	0.144144	CCDC82	0.25	0.842105	0.842105	CCDC82	0.206522	2.17143	0.168421
CCND3	CCND3	0.157025	0.702479	0.140496	CCND3	0.223529	0.894737	0.894737	CCND3	0.186275	2.36111	0.163462
CCNE1	CCNE1	0.108696	0.84058	0.0507246
CCNJL	CCNJL	0.373832	0.570093	0.0560748	CCNJL	0.655738	0.15	0.15	CCNJL	0.597015	1.32609	0.0594059
CCR4	CCR4	0.134831	0.421348	0.44382	CCR4	0.32	3.29167	3.29167	CCR4	0.155844	0.728155	0.79798
CCR7	CCR7	0.214286	0.492063	0.293651	CCR7	0.435484	1.37037	1.37037	CCR7	0.272727	0.96875	0.41573
CCT7_ENST00000258091	CCT7_ENST00000258091	0.393162	0.555556	0.0512821	CCT7_ENST00000258091	0.707692	0.130435	0.130435	CCT7_ENST00000258091	0.647887	1.25	0.0540541
CD79B	CD79B	0.114286	0.807143	0.0785714
CDC23	CDC23	0.156522	0.834783	0.00869565
CDC7	CDC7	0.156863	0.705882	0.137255	CDC7	0.222222	0.875	0.875	CDC7	0.186047	2.4	0.159091
CDC73	CDC73	0.064	0.776	0.16	CDC73	0.0824742	2.5	2.5	CDC73	0.0683761	3.46429	0.190476
CDCA7L	CDCA7L	0.133929	0.732143	0.133929	CDCA7L	0.182927	1	1	CDCA7L	0.154639	2.73333	0.154639
CDCP2	CDCP2	0.472222	0.518519	0.00925926	CDCP2	0.910714	0.0196078	0.0196078	CDCP2	0.894737	1.07692	0.00934579
CDH1	CDH1	0.11042	0.656299	0.233281	CDH1	0.168246	2.11268	2.11268	CDH1	0.124126	1.9095	0.30426
CDK12	CDK12	0.137476	0.73258	0.129944					CDK12	0.159389	2.73944	0.149351
CDK18_ENST00000429964									CDK18_ENST00000429964	0.575	1.68085	0.008
CDK8	CDK8	0.0891089	0.767327	0.143564	CDK8	0.116129	1.61111	1.61111	CDK8	0.0978261	3.29787	0.16763
CDKAL1	CDKAL1	0.154545	0.827273	0.0181818
CDKN1A	CDKN1A	0.103704	0.674074	0.222222	CDKN1A	0.153846	2.14286	2.14286	CDKN1A	0.115702	2.06818	0.285714
CDKN1A_ENST00000448526	CDKN1A_ENST00000448526	0.120968	0.669355	0.209677	CDKN1A_ENST00000448526	0.180723	1.73333	1.73333	CDKN1A_ENST00000448526	0.137615	2.02439	0.265306
CDKN1B	CDKN1B	0.0909091	0.554545	0.354545	CDKN1B	0.163934	3.9	3.9	CDKN1B	0.1	1.2449	0.549296
CDKN2A	CDKN2A	0.0729167	0.582465	0.344618	CDKN2A	0.125186	4.72619	4.72619	CDKN2A	0.0786517	1.39501	0.525828
CDKN2A_ENST00000446177	CDKN2A_ENST00000446177	0.0582147	0.554981	0.386805	CDKN2A_ENST00000446177	0.104895	6.64444	6.64444	CDKN2A_ENST00000446177	0.0618132	1.24709	0.630802
CDKN2A_ENST00000498124	CDKN2A_ENST00000498124	0.0563565	0.564875	0.378768	CDKN2A_ENST00000498124	0.099768	6.72093	6.72093	CDKN2A_ENST00000498124	0.0597222	1.29819	0.609705
CENPI	CENPI	0.165605	0.821656	0.0127389
CEP135	CEP135	0.106796	0.752427	0.140777	CEP135	0.141935	1.31818	1.31818	CEP135	0.119565	3.03922	0.163842
CEP290_ENST00000309041	CEP290_ENST00000309041	0.0935961	0.817734	0.08867	CEP290_ENST00000309041	0.114458	0.947368	0.947368	CEP290_ENST00000309041	0.103261	4.48649	0.0972973
CEP95	CEP95	0.155844	0.707792	0.136364	CEP95	0.220183	0.875	0.875	CEP95	0.184615	2.42222	0.157895
CEP95_ENST00000556440	CEP95_ENST00000556440	0.147651	0.711409	0.14094	CEP95_ENST00000556440	0.207547	0.954545	0.954545	CEP95_ENST00000556440	0.173228	2.46512	0.164062
CES5A	CES5A	0.348066	0.563536	0.0883978	CES5A	0.617647	0.253968	0.253968
CES5A_ENST00000521992	CES5A_ENST00000521992	0.334975	0.586207	0.0788177
CETP	CETP	0.4	0.55	0.05	CETP	0.727273	0.125	0.125	CETP	0.666667	1.22222	0.0526316
CFHR3	CFHR3	0.119497	0.823899	0.0566038
CFI	CFI	0.236559	0.634409	0.129032	CFI	0.372881	0.545455	0.545455	CFI	0.309859	1.73529	0.148148
CFP	CFP	0.184	0.704	0.112
CHD1L	CHD1L	0.121387	0.83815	0.0404624
CHD1L_ENST00000369258	CHD1L_ENST00000369258	0.106557	0.852459	0.0409836
CHEK1	CHEK1	0.10219	0.854015	0.0437956
CHEK2	CHEK2	0.0743802	0.834711	0.0909091	CHEK2	0.0891089	1.22222	1.22222	CHEK2	0.0803571	5.05	0.1
CHEK2_ENST00000382580	CHEK2_ENST00000382580	0.0580645	0.83871	0.103226	CHEK2_ENST00000382580	0.0692308	1.77778	1.77778	CHEK2_ENST00000382580	0.0616438	5.2	0.115108
CHRDL1	CHRDL1	0.218045	0.669173	0.112782
CHRM4	CHRM4	0.393103	0.572414	0.0344828	CHRM4	0.686747	0.0877193	0.0877193	CHRM4	0.647727	1.33871	0.0357143
CHRNB2									CHRNB2	0.561983	1.7	0.0106952
CHRNG					CHRNG	0.605634	0.0930233	0.0930233	CHRNG	0.573333	1.51064	0.0350877
CHST12	CHST12	0.409722	0.590278	0	CHST12	0.694118	0	0	CHST12	0.694118	1.44068	0
CHST4					CHST4	0.6	0.0666667	0.0666667	CHST4	0.576923	1.5625	0.025
CHUK	CHUK	0.118421	0.743421	0.138158	CHUK	0.159292	1.16667	1.16667	CHUK	0.134328	2.89744	0.160305
CLCN7	CLCN7	0.382514	0.590164	0.0273224	CLCN7	0.648148	0.0714286	0.0714286	CLCN7	0.619469	1.44	0.0280899
CLSPN	CLSPN	0.166667	0.717172	0.116162
CLSPN_ENST00000251195	CLSPN_ENST00000251195	0.157895	0.726316	0.115789
CNKSR3					CNKSR3	0.594937	0.106383	0.106383	CNKSR3	0.559524	1.51923	0.0396825
CNR1	CNR1	0.344186	0.590698	0.0651163
CNTN6	CNTN6	0.187713	0.696246	0.116041
COLQ	COLQ	0.222222	0.648148	0.12963	COLQ	0.342857	0.583333	0.583333	COLQ	0.285714	1.84211	0.148936
COLQ_ENST00000383781	COLQ_ENST00000383781	0.194175	0.669903	0.135922	COLQ_ENST00000383781	0.289855	0.7	0.7	COLQ_ENST00000383781	0.240964	2.02941	0.157303
COLQ_ENST00000435459	COLQ_ENST00000435459	0.207921	0.643564	0.148515	COLQ_ENST00000435459	0.323077	0.714286	0.714286	COLQ_ENST00000435459	0.2625	1.80556	0.174419
CPA6_ENST00000518549	CPA6_ENST00000518549	0.201923	0.653846	0.144231	CPA6_ENST00000518549	0.308824	0.714286	0.714286	CPA6_ENST00000518549	0.253012	1.88889	0.168539
CPN2	CPN2	0.360656	0.595628	0.0437158	CPN2	0.605505	0.121212	0.121212	CPN2	0.564103	1.47297	0.0457143
CPSF6	CPSF6	0.124088	0.824818	0.0510949
CPSF6_ENST00000435070	CPSF6_ENST00000435070	0.124088	0.824818	0.0510949
CREBBP	CREBBP	0.118508	0.739576	0.141917	CREBBP	0.160237	1.19753	1.19753	CREBBP	0.13444	2.83989	0.165388
CRHR2					CRHR2	0.586207	0.0784314	0.0784314	CRHR2	0.56044	1.58182	0.0289855
CRHR2_ENST00000348438					CRHR2_ENST00000348438	0.597561	0.0816327	0.0816327	CRHR2_ENST00000348438	0.569767	1.54717	0.0305344
CRISPLD2	CRISPLD2	0.392523	0.598131	0.00934579	CRISPLD2	0.65625	0.0238095	0.0238095	CRISPLD2	0.646154	1.48837	0.00943396
CRMP1					CRMP1	0.586826	0.0918367	0.0918367	CRMP1	0.556818	1.56075	0.0339623
CRP	CRP	0.440678	0.550847	0.00847458	CRP	0.8	0.0192308	0.0192308	CRP	0.787879	1.22642	0.00854701
CTCF	CTCF	0.0833333	0.74187	0.174797	CTCF	0.112329	2.09756	2.09756	CTCF	0.0909091	2.87402	0.211823
CTNNB1	CTNNB1	0.0142971	0.971803	0.0138999	CTNNB1	0.0147119	0.972222	0.972222	CTNNB1	0.0145044	34.4648	0.0140959
CTNND1	CTNND1	0.140271	0.710407	0.149321	CTNND1	0.197452	1.06452	1.06452	CTNND1	0.163158	2.45312	0.175532
CTNND1_ENST00000399050	CTNND1_ENST00000399050	0.131818	0.722727	0.145455	CTNND1_ENST00000399050	0.18239	1.10345	1.10345	CTNND1_ENST00000399050	0.151832	2.60656	0.170213
CTSG	CTSG	0.328467	0.583942	0.0875912
CUL3	CUL3	0.111498	0.790941	0.097561
CX3CR1	CX3CR1	0.388889	0.583333	0.0277778	CX3CR1	0.666667	0.0714286	0.0714286	CX3CR1	0.636364	1.4	0.0285714
CX3CR1_ENST00000358309	CX3CR1_ENST00000358309	0.373239	0.598592	0.028169	CX3CR1_ENST00000358309	0.623529	0.0754717	0.0754717	CX3CR1_ENST00000358309	0.595506	1.49123	0.0289855
CXXC1	CXXC1	0.132184	0.83908	0.0287356
CYLD	CYLD	0.183036	0.633929	0.183036	CYLD	0.288732	1	1	CYLD	0.224044	1.73171	0.224044
CYLD_ENST00000427738	CYLD_ENST00000427738	0.179245	0.679245	0.141509	CYLD_ENST00000427738	0.263889	0.789474	0.789474	CYLD_ENST00000427738	0.218391	2.11765	0.164835
CYP27A1	CYP27A1	0.416	0.56	0.024	CYP27A1	0.742857	0.0576923	0.0576923	CYP27A1	0.712329	1.27273	0.0245902
CYP39A1	CYP39A1	0.118812	0.831683	0.049505
CYP4F11					CYP4F11	0.607143	0.0823529	0.0823529	CYP4F11	0.578231	1.52174	0.0311111
CYP4F2					CYP4F2	0.590909	0.102564	0.102564	CYP4F2	0.557143	1.53488	0.0380952
CSNK2A1	CSNK2A1	0.141667	0.675	0.183333	CSNK2A1	0.209877	1.29412	1.29412	CSNK2A1	0.165049	2.07692	0.22449
DAGLB	DAGLB	0.384146	0.591463	0.0243902	DAGLB	0.649485	0.0634921	0.0634921	DAGLB	0.623762	1.44776	0.025
DAXX	DAXX	0.162252	0.711921	0.125828
DDO	DDO	0.304	0.592	0.104
DDX17	DDX17	0.132075	0.823899	0.0440252
DDX17_ENST00000381633	DDX17_ENST00000381633	0.125874	0.832168	0.041958
DDX3X	DDX3X	0.0992908	0.822695	0.0780142
DDX4	DDX4	0.117647	0.782353	0.1
DDX4_ENST00000505374	DDX4_ENST00000505374	0.117284	0.783951	0.0987654
DDX4_ENST00000511853	DDX4_ENST00000511853	0.115385	0.8	0.0846154
DENND1A_ENST00000373618	DENND1A_ENST00000373618	0.372549	0.578431	0.0490196	DENND1A_ENST00000373618	0.644068	0.131579	0.131579	DENND1A_ENST00000373618	0.59375	1.37209	0.0515464
DENND1A_ENST00000373620	DENND1A_ENST00000373620	0.372881	0.584746	0.0423729	DENND1A_ENST00000373620	0.637681	0.113636	0.113636	DENND1A_ENST00000373620	0.594595	1.40816	0.0442478
DENND4C	DENND4C	0.142292	0.837945	0.0197628
DFNA5	DFNA5	0.36	0.584	0.056	DFNA5	0.616438	0.155556	0.155556	DFNA5	0.5625	1.40385	0.059322
DHCR7	DHCR7	0.397059	0.588235	0.0147059	DHCR7	0.675	0.037037	0.037037	DHCR7	0.658537	1.42857	0.0149254
DHCR7_ENST00000355527	DHCR7_ENST00000355527	0.4	0.584615	0.0153846	DHCR7_ENST00000355527	0.684211	0.0384615	0.0384615	DHCR7_ENST00000355527	0.666667	1.40741	0.015625
DHRS2					DHRS2	0.588235	0.125	0.125
DHRS2_ENST00000344777	DHRS2_ENST00000344777	0.362069	0.586207	0.0517241	DHRS2_ENST00000344777	0.617647	0.142857	0.142857	DHRS2_ENST00000344777	0.567568	1.41667	0.0545455
DHX16	DHX16	0.217822	0.663366	0.118812
DHX16_ENST00000376442	DHX16_ENST00000376442	0.229665	0.655502	0.114833
DICER1	DICER1	0.111386	0.829208	0.0594059
DIRAS3									DIRAS3	0.560606	1.64103	0.019802
DIS3	DIS3	0.111821	0.833866	0.0543131
DLL1					DLL1	0.59542	0.0897436	0.0897436	DLL1	0.565217	1.54118	0.0334928
DMRT3	DMRT3	0.378531	0.587571	0.0338983	DMRT3	0.644231	0.0895522	0.0895522	DMRT3	0.609091	1.42466	0.0350877
DNAJC11	DNAJC11	0.323077	0.584615	0.0923077
DNMT3A	DNMT3A	0.103325	0.81829	0.0783848
DRD2_ENST00000355319	DRD2_ENST00000355319	0.372222	0.622222	0.00555556	DRD2_ENST00000355319	0.598214	0.0149254	0.0149254	DRD2_ENST00000355319	0.59292	1.64706	0.00558659
DUSP16	DUSP16	0.262821	0.487179	0.25	DUSP16	0.539474	0.95122	0.95122	DUSP16	0.356522	0.95	0.333333
DUX4L1	DUX4L1	0	0.982759	0.0172414	DUX4L1	0	#DIV/0!	#DIV/0!	DUX4L1	0	57	0.0175439
DUX4L2	DUX4L2	0	1	0	DUX4L2	0	#DIV/0!	#DIV/0!	DUX4L2	0	#DIV/0!	0
DYRK1A	DYRK1A	0.300412	0.576132	0.123457	DYRK1A	0.521429	0.410959	0.410959
DYRK1A_ENST00000338785	DYRK1A_ENST00000338785	0.132353	0.676471	0.191176	DYRK1A_ENST00000338785	0.195652	1.44444	1.44444	DYRK1A_ENST00000338785	0.152542	2.09091	0.236364
EDIL3	EDIL3	0.165854	0.707317	0.126829
EED	EED	0.104478	0.813433	0.0820896
EEF1D	EEF1D	0.387097	0.604839	0.00806452	EEF1D	0.64	0.0208333	0.0208333	EEF1D	0.631579	1.53061	0.00813008
EEF1D_ENST00000423316	EEF1D_ENST00000423316	0.404762	0.587302	0.00793651	EEF1D_ENST00000423316	0.689189	0.0196078	0.0196078	EEF1D_ENST00000423316	0.68	1.42308	0.008
EFHA2	EFHA2	0.109489	0.766423	0.124088
EGFR	EGFR	0.0814815	0.906349	0.0121693	EGFR	0.0899008	0.149351	0.149351	EGFR	0.0887097	9.67797	0.0123192
EGFR_ENST00000342916	EGFR_ENST00000342916	0.113971	0.875	0.0110294
EGFR_ENST00000344576	EGFR_ENST00000344576	0.14786	0.836576	0.0155642
EGFR_ENST00000442591	EGFR_ENST00000442591	0.122867	0.863481	0.0136519
EGR4	EGR4	0.394495	0.577982	0.0275229	EGR4	0.68254	0.0697674	0.0697674	EGR4	0.651515	1.36957	0.0283019
EHD1					EHD1	0.602273	0.0754717	0.0754717	EHD1	0.576087	1.54386	0.0283688
EHD3	EHD3	0.389744	0.579487	0.0307692	EHD3	0.672566	0.0789474	0.0789474	EHD3	0.638655	1.37805	0.031746
EHD4	EHD4	0.377778	0.577778	0.0444444	EHD4	0.653846	0.117647	0.117647	EHD4	0.607143	1.36842	0.0465116
EIF1AX	EIF1AX	0.0396825	0.928571	0.031746	EIF1AX	0.042735	0.8	0.8	EIF1AX	0.0413223	13	0.0327869
EIF2AK1	EIF2AK1	0.227848	0.639241	0.132911	EIF2AK1	0.356436	0.583333	0.583333	EIF2AK1	0.295082	1.77193	0.153285
EIF2AK1_ENST00000536084	EIF2AK1_ENST00000536084	0.224	0.616	0.16	EIF2AK1_ENST00000536084	0.363636	0.714286	0.714286	EIF2AK1_ENST00000536084	0.28866	1.60417	0.190476
EME2	EME2	0.368932	0.563107	0.0679612	EME2	0.655172	0.184211	0.184211	EME2	0.584615	1.28889	0.0729167
EME2_ENST00000307394	EME2_ENST00000307394	0.401961	0.578431	0.0196078	EME2_ENST00000307394	0.694915	0.0487805	0.0487805	EME2_ENST00000307394	0.672131	1.37209	0.02
ENG	ENG	0.412281	0.535088	0.0526316	ENG	0.770492	0.12766	0.12766	ENG	0.701493	1.15094	0.0555556
ENG_ENST00000373203	ENG_ENST00000373203	0.389381	0.557522	0.0530973	ENG_ENST00000373203	0.698413	0.136364	0.136364	ENG_ENST00000373203	0.637681	1.26	0.0560748
ENPP4	ENPP4	0.140741	0.82963	0.0296296
ENPP7					ENPP7	0.596154	0.0806452	0.0806452	ENPP7	0.568807	1.55224	0.0301205
ENSG00000174501	ENSG00000174501	0.131387	0.843066	0.0255474
ENSG00000198064	ENSG00000198064	0.386555	0.613445	0	ENSG00000198064	0.630137	0	0	ENSG00000198064	0.630137	1.58696	0
ENSG00000226807					ENSG00000226807	0.58642	0.0947368	0.0947368
ENTPD2	ENTPD2	0.481481	0.481481	0.037037	ENTPD2	1	0.0769231	0.0769231	ENTPD2	0.928571	0.928571	0.0384615
EP300	EP300	0.0795974	0.78957	0.130833	EP300	0.100811	1.64368	1.64368	EP300	0.0864811	3.75217	0.150526
EPHA3_ENST00000452448	EPHA3_ENST00000452448	0.112051	0.788584	0.0993658
EPYC	EPYC	0.235849	0.650943	0.113208
ERBB2	ERBB2	0.0897833	0.895769	0.0144479	ERBB2	0.10023	0.16092	0.16092	ERBB2	0.0986395	8.59406	0.0146597
ERBB2_ENST00000541774	ERBB2_ENST00000541774	0.0692042	0.918685	0.0121107	ERBB2_ENST00000541774	0.0753296	0.175	0.175	ERBB2_ENST00000541774	0.0743494	11.2979	0.0122592
ERBB3	ERBB3	0.100737	0.872236	0.027027	ERBB3	0.115493	0.268293	0.268293
ERBB3_ENST00000267101	ERBB3_ENST00000267101	0.0925684	0.886571	0.0208605	ERBB3_ENST00000267101	0.104412	0.225352	0.225352	ERBB3_ENST00000267101	0.102011	7.81609	0.0213049
ERBB3_ENST00000411731	ERBB3_ENST00000411731	0.0758621	0.889655	0.0344828	ERBB3_ENST00000411731	0.0852713	0.454545	0.454545	ERBB3_ENST00000411731	0.0820896	8.0625	0.0357143
ERBB4	ERBB4	0.112807	0.812553	0.0746395
ERBB4_ENST00000402597	ERBB4_ENST00000402597	0.116194	0.806953	0.0768527
ERCC2_ENST00000391945	ERCC2_ENST00000391945	0.114613	0.873926	0.0114613
ERCC2_ENST00000485403	ERCC2_ENST00000485403	0.0652174	0.929348	0.00543478	ERCC2_ENST00000485403	0.0701754	0.0833333	0.0833333	ERCC2_ENST00000485403	0.0697674	13.1538	0.00546448
ERLEC1	ERLEC1	0.158416	0.821782	0.019802
ESR1	ESR1	0.105058	0.867704	0.0272374
ETV1	ETV1	0.117424	0.829545	0.0530303
ETV4_ENST00000319349	ETV4_ENST00000319349	0.368932	0.572816	0.0582524	ETV4_ENST00000319349	0.644068	0.157895	0.157895	ETV4_ENST00000319349	0.584615	1.34091	0.0618557
ETV6	ETV6	0.114379	0.820261	0.0653595
EXOC1	EXOC1	0.117347	0.821429	0.0612245
EXT1	EXT1	0.48368	0.489614	0.0267062	EXT1	0.987879	0.0552147	0.0552147	EXT1	0.936782	0.959302	0.027439
EZH2	EZH2	0.0792291	0.862955	0.0578158	EZH2	0.0918114	0.72973	0.72973	EZH2	0.0860465	6.29687	0.0613636
EZH2_ENST00000350995	EZH2_ENST00000350995	0.0902439	0.853659	0.0560976	EZH2_ENST00000350995	0.105714	0.621622	0.621622	EZH2_ENST00000350995	0.0991957	5.83333	0.0594315
FAM108A1	FAM108A1	0.509259	0.490741	0	FAM108A1	1.03774	0	0	FAM108A1	1.03774	0.963636	0
FAM123B_ENST00000330258	FAM123B_ENST00000330258	0.0955519	0.621087	0.283361	FAM123B_ENST00000330258	0.153846	2.96552	2.96552	FAM123B_ENST00000330258	0.105647	1.63913	0.395402
FAM126A	FAM126A	0.183333	0.691667	0.125	FAM126A	0.26506	0.681818	0.681818
FAM39B	FAM39B	0.422535	0.570423	0.00704225	FAM39B	0.740741	0.0166667	0.0166667	FAM39B	0.731707	1.32787	0.0070922
FAM55A	FAM55A	0.116788	0.854015	0.0291971
FANCC_ENST00000289081	FANCC_ENST00000289081	0.138728	0.820809	0.0404624
FAS	FAS	0.190909	0.672727	0.136364	FAS	0.283784	0.714286	0.714286	FAS	0.235955	2.05556	0.157895
FASTK									FASTK	0.558824	1.71795	0.00952381
FAT	FAT	0.149777	0.693764	0.156459	FAT	0.215891	1.04461	1.04461	FAT	0.176162	2.26545	0.185479
FAT1	FAT1	0.149165	0.690361	0.160474	FAT1	0.216069	1.07581	1.07581	FAT1	0.175316	2.22957	0.191148
FBRS_ENST00000356166	FBRS_ENST00000356166	0.368852	0.57377	0.057377	FBRS_ENST00000356166	0.642857	0.155556	0.155556	FBRS_ENST00000356166	0.584416	1.34615	0.0608696
FBXL18									FBXL18	0.57377	1.66667	0.0105263
FBXL18_ENST00000382368									FBXL18_ENST00000382368	0.56391	1.7013	0.00970874
FBXL18_ENST00000453700									FBXL18_ENST00000453700	0.568	1.64865	0.015544
FBXO11	FBXO11	0.138462	0.830769	0.0307692
FBXO7	FBXO7	0.350427	0.589744	0.0598291	FBXO7	0.594203	0.170732	0.170732
FBXO7_ENST00000266087	FBXO7_ENST00000266087	0.353448	0.586207	0.0603448	FBXO7_ENST00000266087	0.602941	0.170732	0.170732
FBXO7_ENST00000382058	FBXO7_ENST00000382058	0.383178	0.560748	0.0560748	FBXO7_ENST00000382058	0.683333	0.146341	0.146341	FBXO7_ENST00000382058	0.621212	1.2766	0.0594059
FBXW2_ENST00000373926	FBXW2_ENST00000373926	0.466102	0.516949	0.0169492	FBXW2_ENST00000373926	0.901639	0.0363636	0.0363636	FBXW2_ENST00000373926	0.873016	1.07018	0.0172414
FBXW7	FBXW7	0.027027	0.804054	0.168919	FBXW7	0.0336134	6.25	6.25	FBXW7	0.0277778	4.10345	0.203252
FBXW7_ENST00000281708	FBXW7_ENST00000281708	0.0311388	0.798043	0.170819	FBXW7_ENST00000281708	0.039019	5.48571	5.48571	FBXW7_ENST00000281708	0.0321396	3.95154	0.206009
FBXW7_ENST00000296555	FBXW7_ENST00000296555	0.0304519	0.804519	0.165029	FBXW7_ENST00000296555	0.037851	5.41935	5.41935	FBXW7_ENST00000296555	0.0314083	4.11558	0.197647
FBXW7_ENST00000393956	FBXW7_ENST00000393956	0.00890869	0.859688	0.131403	FBXW7_ENST00000393956	0.0103627	14.75	14.75	FBXW7_ENST00000393956	0.00898876	6.12698	0.151282
FBXW7_ENST00000534231	FBXW7_ENST00000534231	0.0278884	0.817729	0.154382	FBXW7_ENST00000534231	0.0341048	5.53571	5.53571	FBXW7_ENST00000534231	0.0286885	4.48634	0.182568
FBXW7_NM_018315_2	FBXW7_NM_018315_2	0.0370028	0.802035	0.160962	FBXW7_NM_018315_2	0.0461361	4.35	4.35	FBXW7_NM_018315_2	0.0384246	4.0514	0.191841
FCN2	FCN2	0.370079	0.614173	0.015748	FCN2	0.602564	0.0425532	0.0425532	FCN2	0.5875	1.59184	0.016
FDXACB1	FDXACB1	0.322581	0.58871	0.0887097
FEM1A	FEM1A	0.373913	0.573913	0.0521739	FEM1A	0.651515	0.139535	0.139535	FEM1A	0.597222	1.34694	0.0550459
FGD4	FGD4	0.197368	0.677632	0.125	FGD4	0.291262	0.633333	0.633333
FGF3	FGF3	0.14966	0.823129	0.0272109
FGFR2	FGFR2	0.106383	0.864157	0.0294599
FGFR2_ENST00000351936	FGFR2_ENST00000351936	0.114519	0.854806	0.0306748
FGFR2_ENST00000357555	FGFR2_ENST00000357555	0.103448	0.862069	0.0344828
FGFR2_ENST00000369056	FGFR2_ENST00000369056	0.104651	0.860465	0.0348837
FGFR2_ENST00000457416	FGFR2_ENST00000457416	0.111562	0.855984	0.0324544
FGFR3	FGFR3	0.0700935	0.928349	0.00155763	FGFR3	0.0755034	0.0222222	0.0222222	FGFR3	0.0753769	12.9565	0.00156006
FGFR3_ENST00000340107	FGFR3_ENST00000340107	0.130217	0.864775	0.00500835
FH	FH	0.091954	0.862069	0.045977	FH	0.106667	0.5	0.5	FH	0.101266	6.25	0.0481928
FLT3	FLT3	0.101987	0.864901	0.0331126	FLT3	0.117917	0.324675	0.324675
FOXA1	FOXA1	0.132597	0.861878	0.00552486
FOXD4	FOXD4	0.390244	0.585366	0.0243902	FOXD4	0.666667	0.0625	0.0625	FOXD4	0.64	1.41176	0.025
FOXD4_ENST00000382500					FOXD4_ENST00000382500	0.5875	0.0638298	0.0638298	FOXD4_ENST00000382500	0.566265	1.6	0.023622
FOXG1	FOXG1	0.46519	0.515823	0.0189873	FOXG1	0.90184	0.0408163	0.0408163	FOXG1	0.869822	1.06536	0.0193548
FOXI1	FOXI1	0.385542	0.590361	0.0240964	FOXI1	0.653061	0.0625	0.0625	FOXI1	0.627451	1.44118	0.0246914
FOXL2	FOXL2	0.0783582	0.914179	0.00746269	FOXL2	0.0857143	0.0952381	0.0952381	FOXL2	0.0850202	10.6522	0.0075188
FOXP1	FOXP1	0.178788	0.709091	0.112121
FOXP2	FOXP2	0.372014	0.580205	0.0477816	FOXP2	0.641176	0.12844	0.12844	FOXP2	0.592391	1.38211	0.0501792
FOXP2_ENST00000393500	FOXP2_ENST00000393500	0.563758	0.402685	0.033557	FOXP2_ENST00000393500	1.4	0.0595238	0.0595238	FOXP2_ENST00000393500	1.29231	0.674157	0.0347222
FOXP2_ENST00000403559	FOXP2_ENST00000403559	0.389961	0.563707	0.046332	FOXP2_ENST00000403559	0.691781	0.118812	0.118812	FOXP2_ENST00000403559	0.639241	1.29204	0.048583
FTSJD1	FTSJD1	0.147651	0.731544	0.120805
FUBP1_ENST00000370767	FUBP1_ENST00000370767	0.139013	0.686099	0.174888	FUBP1_ENST00000370767	0.202614	1.25806	1.25806	FUBP1_ENST00000370767	0.161458	2.18571	0.211957
FUBP1_ENST00000370768	FUBP1_ENST00000370768	0.134783	0.691304	0.173913	FUBP1_ENST00000370768	0.194969	1.29032	1.29032	FUBP1_ENST00000370768	0.155779	2.23944	0.210526
FUBP1_ENST00000436586	FUBP1_ENST00000436586	0.140351	0.684211	0.175439	FUBP1_ENST00000436586	0.205128	1.25	1.25	FUBP1_ENST00000436586	0.163265	2.16667	0.212766
FURIN					FURIN	0.585366	0.125	0.125
FUS	FUS	0.380282	0.570423	0.0492958	FUS	0.666667	0.12963	0.12963	FUS	0.613636	1.32787	0.0518519
FUS_ENST00000254108	FUS_ENST00000254108	0.388889	0.555556	0.0555556	FUS_ENST00000254108	0.7	0.142857	0.142857	FUS_ENST00000254108	0.636364	1.25	0.0588235
FUT1	FUT1	0.376623	0.603896	0.0194805	FUT1	0.623656	0.0517241	0.0517241	FUT1	0.604167	1.52459	0.0198675
FZD2	FZD2	0.385787	0.588832	0.0253807	FZD2	0.655172	0.0657895	0.0657895	FZD2	0.628099	1.4321	0.0260417
G2E3	G2E3	0.144928	0.731884	0.123188
G3BP2	G3BP2	0.125	0.830357	0.0446429
G6PD_ENST00000393562									G6PD_ENST00000393562	0.556818	1.74	0.00735294
GAA	GAA	0.386266	0.596567	0.0171674	GAA	0.647482	0.0444444	0.0444444	GAA	0.629371	1.47872	0.0174672
GABRD	GABRD	0.380645	0.619355	0	GABRD	0.614583	0	0	GABRD	0.614583	1.62712	0
GALNTL5	GALNTL5	0.129771	0.824427	0.0458015
GATA1_ENST00000376665	GATA1_ENST00000376665	0.122951	0.860656	0.0163934
GATA2	GATA2	0.10231	0.864686	0.0330033	GATA2	0.118321	0.322581	0.322581
GCFC1	GCFC1	0.184211	0.694737	0.121053
GCK_ENST00000395796	GCK_ENST00000395796	0.372222	0.611111	0.0166667	GCK_ENST00000395796	0.609091	0.0447761	0.0447761	GCK_ENST00000395796	0.59292	1.57143	0.0169492
GFPT2	GFPT2	0.397849	0.586022	0.016129	GFPT2	0.678899	0.0405405	0.0405405	GFPT2	0.660714	1.41558	0.0163934
GGN									GGN	0.566038	1.72131	0.00606061
GIGYF2	GIGYF2	0.159091	0.662338	0.178571	GIGYF2	0.240196	1.12245	1.12245	GIGYF2	0.189189	1.96154	0.217391
GIGYF2_ENST00000409451	GIGYF2_ENST00000409451	0.159722	0.673611	0.166667	GIGYF2_ENST00000409451	0.237113	1.04348	1.04348	GIGYF2_ENST00000409451	0.190083	2.06383	0.2
GIGYF2_ENST00000452341	GIGYF2_ENST00000452341	0.173913	0.614907	0.21118	GIGYF2_ENST00000452341	0.282828	1.21429	1.21429	GIGYF2_ENST00000452341	0.210526	1.59677	0.267717
GJA3	GJA3	0.408333	0.533333	0.0583333	GJA3	0.765625	0.142857	0.142857	GJA3	0.690141	1.14286	0.0619469
GJA8	GJA8	0.388278	0.589744	0.021978	GJA8	0.658385	0.0566038	0.0566038	GJA8	0.634731	1.4375	0.0224719
GJB4	GJB4	0.405405	0.585586	0.00900901	GJB4	0.692308	0.0222222	0.0222222	GJB4	0.681818	1.41304	0.00909091
GLT6D1					GLT6D1	0.585366	0.104167	0.104167
GNA11	GNA11	0.135417	0.850694	0.0138889
GNAQ	GNAQ	0.125424	0.823729	0.0508475
GNAS	GNAS	0.0345304	0.94337	0.0220994	GNAS	0.0366032	0.64	0.64	GNAS	0.0357654	16.6585	0.0225989
GNAS_ENST00000371100	GNAS_ENST00000371100	0.132075	0.843666	0.0242588
GNE	GNE	0.139706	0.838235	0.0220588
GNE_ENST00000396594	GNE_ENST00000396594	0.141791	0.835821	0.0223881
GNPTAB	GNPTAB	0.212963	0.662037	0.125	GNPTAB	0.321678	0.586957	0.586957
GOLGA5_ENST00000163416	GOLGA5_ENST00000163416	0.126667	0.76	0.113333
GP1BA	GP1BA	0.369565	0.594203	0.0362319	GP1BA	0.621951	0.0980392	0.0980392	GP1BA	0.586207	1.46429	0.037594
GP5	GP5	0.434783	0.538043	0.0271739	GP5	0.808081	0.0625	0.0625	GP5	0.769231	1.16471	0.027933
GP5_ENST00000323007	GP5_ENST00000323007	0.426316	0.547368	0.0263158	GP5_ENST00000323007	0.778846	0.0617284	0.0617284	GP5_ENST00000323007	0.743119	1.2093	0.027027
GPR108	GPR108	0.388889	0.563492	0.047619	GPR108	0.690141	0.122449	0.122449	GPR108	0.636364	1.29091	0.05
GPR152	GPR152	0.348485	0.55303	0.0984848	GPR152	0.630137	0.282609	0.282609
GPR26	GPR26	0.381944	0.604167	0.0138889	GPR26	0.632184	0.0363636	0.0363636	GPR26	0.617978	1.52632	0.0140845
GPR31	GPR31	0.42	0.58	0	GPR31	0.724138	0	0	GPR31	0.724138	1.38095	0
GPR77	GPR77	0.385246	0.598361	0.0163934	GPR77	0.643836	0.0425532	0.0425532	GPR77	0.626667	1.4898	0.0166667
GPR97					GPR97	0.59375	0.0701754	0.0701754	GPR97	0.57	1.57377	0.0261438
GPSM2	GPSM2	0.113043	0.808696	0.0782609
GRLF1	GRLF1	0.175202	0.679245	0.145553	GRLF1	0.257937	0.830769	0.830769	GRLF1	0.212418	2.11765	0.170347
GRLF1_ENST00000317082	GRLF1_ENST00000317082	0.17602	0.67602	0.147959	GRLF1_ENST00000317082	0.260377	0.84058	0.84058	GRLF1_ENST00000317082	0.213622	2.08661	0.173653
GRM6	GRM6	0.376847	0.583744	0.0394089	GRM6	0.64557	0.104575	0.104575	GRM6	0.604743	1.40237	0.0410256
GRPR	GRPR	0.405594	0.58042	0.013986	GRPR	0.698795	0.0344828	0.0344828	GRPR	0.682353	1.38333	0.0141844
GSDMB	GSDMB	0.359223	0.563107	0.0776699	GSDMB	0.637931	0.216216	0.216216	GSDMB	0.560606	1.28889	0.0842105
GSDMB_ENST00000418519	GSDMB_ENST00000418519	0.35514	0.570093	0.0747664	GSDMB_ENST00000418519	0.622951	0.210526	0.210526
GSK3B_ENST00000316626	GSK3B_ENST00000316626	0.100629	0.767296	0.132075					GSK3B_ENST00000316626	0.111888	3.2973	0.152174
GTF2E1	GTF2E1	0.144144	0.828829	0.027027
GTPBP5	GTPBP5	0.40367	0.568807	0.0275229	GTPBP5	0.709677	0.0681818	0.0681818	GTPBP5	0.676923	1.31915	0.0283019
H3F3A	H3F3A	0.0264151	0.969811	0.00377358	H3F3A	0.0272374	0.142857	0.142857	H3F3A	0.0271318	32.125	0.00378788
HAPLN4	HAPLN4	0.416667	0.555556	0.0277778	HAPLN4	0.75	0.0666667	0.0666667	HAPLN4	0.714286	1.25	0.0285714
HCRTR1	HCRTR1	0.387931	0.577586	0.0344828	HCRTR1	0.671642	0.0888889	0.0888889	HCRTR1	0.633803	1.36735	0.0357143
HDX	HDX	0.132597	0.823204	0.0441989
HGF	HGF	0.118729	0.795987	0.0852843
HIC1									HIC1	0.5625	1.77778	0
HIC1_ENST00000322941									HIC1_ENST00000322941	0.575	1.73913	0
HIST1H3B	HIST1H3B	0.115385	0.863248	0.0213675
HKR1_ENST00000392153	HKR1_ENST00000392153	0.336283	0.584071	0.079646
HLA-A	HLA-A	0.122807	0.608187	0.269006	HLA-A	0.201923	2.19048	2.19048	HLA-A	0.14	1.55224	0.368
HLA-A_ENST00000376806	HLA-A_ENST00000376806	0.0896552	0.634483	0.275862	HLA-A_ENST00000376806	0.141304	3.07692	3.07692	HLA-A_ENST00000376806	0.0984848	1.73585	0.380952
HLA-B	HLA-B	0.125654	0.706806	0.167539	HLA-B	0.177778	1.33333	1.33333	HLA-B	0.143713	2.41071	0.201258
HNF1A_ENST00000543427	HNF1A_ENST00000543427	0.10929	0.852459	0.0382514
HNRNPA2B1	HNRNPA2B1	0.0990991	0.828829	0.0720721
HNRNPA2B1_ENST00000354667	HNRNPA2B1_ENST00000354667	0.0990991	0.828829	0.0720721
HNRNPK	HNRNPK	0.125	0.841667	0.0333333
HNRNPR	HNRNPR	0.395522	0.589552	0.0149254	HNRNPR	0.670886	0.0377358	0.0377358	HNRNPR	0.654321	1.43636	0.0151515
HNRPR	HNRPR	0.395522	0.589552	0.0149254	HNRPR	0.670886	0.0377358	0.0377358	HNRPR	0.654321	1.43636	0.0151515
HOMEZ_ENST00000357460	HOMEZ_ENST00000357460	0.141509	0.820755	0.0377358
HOXA11	HOXA11	0.4	0.52381	0.0761905	HOXA11	0.763636	0.190476	0.190476	HOXA11	0.666667	1.1	0.0824742
HOXB3	HOXB3	0.384615	0.589744	0.025641	HOXB3	0.652174	0.0666667	0.0666667	HOXB3	0.625	1.4375	0.0263158
HOXD10	HOXD10	0.531792	0.445087	0.0231214	HOXD10	1.19481	0.0434783	0.0434783	HOXD10	1.1358	0.802083	0.0236686
HOXD3	HOXD3	0.398693	0.575163	0.0261438	HOXD3	0.693182	0.0655738	0.0655738	HOXD3	0.663043	1.35385	0.0268456
HRAS	HRAS	0.0149254	0.979647	0.00542741	HRAS	0.0152355	0.363636	0.363636	HRAS	0.0151515	48.1333	0.00545703
HRAS_ENST00000397594	HRAS_ENST00000397594	0.0243902	0.96206	0.0135501	HRAS_ENST00000397594	0.0253521	0.555556	0.555556	HRAS_ENST00000397594	0.025	25.3571	0.0137363
HS3ST3A1	HS3ST3A1	0.380531	0.610619	0.00884956	HS3ST3A1	0.623188	0.0232558	0.0232558	HS3ST3A1	0.614286	1.56818	0.00892857
HSD3B1	HSD3B1	0.36	0.584	0.056	HSD3B1	0.616438	0.155556	0.155556	HSD3B1	0.5625	1.40385	0.059322
HSPA2	HSPA2	0.387435	0.60733	0.0052356	HSPA2	0.637931	0.0135135	0.0135135	HSPA2	0.632479	1.54667	0.00526316
IDH1	IDH1	0.00732218	0.989017	0.00366109	IDH1	0.00740349	0.5	0.5	IDH1	0.00737619	90.0476	0.00367454
IDH2	IDH2	0.0420792	0.935644	0.0222772	IDH2	0.0449735	0.529412	0.529412	IDH2	0.0439276	14.5385	0.0227848
IDH3B	IDH3B	0.135922	0.84466	0.0194175
IFT57	IFT57	0.192308	0.644231	0.163462	IFT57	0.298507	0.85	0.85	IFT57	0.238095	1.81081	0.195402
IGF1_ENST00000307046	IGF1_ENST00000307046	0.122951	0.844262	0.0327869
IGSF21	IGSF21	0.386364	0.590909	0.0227273	IGSF21	0.653846	0.0588235	0.0588235	IGSF21	0.62963	1.44444	0.0232558
IL12RB1	IL12RB1	0.369369	0.54955	0.0810811	IL12RB1	0.672131	0.219512	0.219512	IL12RB1	0.585714	1.22	0.0882353
IL12RB1_ENST00000430026	IL12RB1_ENST00000430026	0.360406	0.57868	0.0609137	IL12RB1_ENST00000430026	0.622807	0.169014	0.169014	IL12RB1_ENST00000430026	0.563492	1.37349	0.0648649
IL12RB1_ENST00000593993	IL12RB1_ENST00000593993	0.361257	0.570681	0.0680628	IL12RB1_ENST00000593993	0.633028	0.188406	0.188406	IL12RB1_ENST00000593993	0.565574	1.32927	0.0730337
IL1RAP_ENST00000443369	IL1RAP_ENST00000443369	0.212766	0.673759	0.113475
IL1RAPL1	IL1RAPL1	0.222642	0.660377	0.116981
IL1RAPL1_ENST00000378993	IL1RAPL1_ENST00000378993	0.221374	0.664122	0.114504
IMP5	IMP5	0.384146	0.609756	0.00609756	IMP5	0.63	0.015873	0.015873	IMP5	0.623762	1.5625	0.00613497
ING1	ING1	0.206349	0.626984	0.166667	ING1	0.329114	0.807692	0.807692	ING1	0.26	1.68085	0.2
ING1_ENST00000338450	ING1_ENST00000338450	0.2	0.617391	0.182609	ING1_ENST00000338450	0.323944	0.913043	0.913043	ING1_ENST00000338450	0.25	1.61364	0.223404
ING1_ENST00000375774	ING1_ENST00000375774	0.188312	0.681818	0.12987	ING1_ENST00000375774	0.27619	0.689655	0.689655	ING1_ENST00000375774	0.232	2.14286	0.149254
IRF2BPL	IRF2BPL	0.37415	0.62585	0	IRF2BPL	0.597826	0	0	IRF2BPL	0.597826	1.67273	0
IRF3	IRF3	0.407407	0.564815	0.0277778	IRF3	0.721311	0.0681818	0.0681818	IRF3	0.6875	1.29787	0.0285714
IRGQ	IRGQ	0.373016	0.571429	0.0555556	IRGQ	0.652778	0.148936	0.148936	IRGQ	0.594937	1.33333	0.0588235
IRS2	IRS2	0.138015	0.854722	0.00726392
ITFG3_ENST00000450082					ITFG3_ENST00000450082	0.594937	0.0851064	0.0851064	ITFG3_ENST00000450082	0.566265	1.54902	0.031746
ITGA11	ITGA11	0.401294	0.576052	0.0226537	ITGA11	0.696629	0.0564516	0.0564516	ITGA11	0.67027	1.35878	0.0231788
ITGBL1	ITGBL1	0.128866	0.845361	0.0257732
ITPRIP	ITPRIP	0.38255	0.610738	0.00671141	ITPRIP	0.626374	0.0175439	0.0175439	ITPRIP	0.619565	1.56897	0.00675676
IWS1	IWS1	0.167665	0.694611	0.137725	IWS1	0.241379	0.821429	0.821429	IWS1	0.201439	2.27451	0.159722
JAK1	JAK1	0.10325	0.81262	0.08413
JAK2	JAK2	0.0291314	0.947564	0.0233051	JAK2	0.0307434	0.8	0.8	JAK2	0.0300055	18.0707	0.0238612
JAK3_ENST00000534444	JAK3_ENST00000534444	0.0658436	0.868313	0.0658436	JAK3_ENST00000534444	0.0758294	1	1	JAK3_ENST00000534444	0.0704846	6.59375	0.0704846
KCNC1	KCNC1	0.412037	0.578704	0.00925926	KCNC1	0.712	0.0224719	0.0224719	KCNC1	0.700787	1.37363	0.00934579
KCNC1_ENST00000265969	KCNC1_ENST00000265969	0.408889	0.591111	0	KCNC1_ENST00000265969	0.691729	0	0	KCNC1_ENST00000265969	0.691729	1.44565	0
KCNG1_ENST00000396017	KCNG1_ENST00000396017	0.387755	0.585034	0.0272109	KCNG1_ENST00000396017	0.662791	0.0701754	0.0701754	KCNG1_ENST00000396017	0.633333	1.40984	0.027972
KCNG4	KCNG4	0.398104	0.554502	0.0473934	KCNG4	0.717949	0.119048	0.119048	KCNG4	0.661417	1.24468	0.0497512
KCNJ11	KCNJ11	0.390909	0.590909	0.0181818	KCNJ11	0.661538	0.0465116	0.0465116	KCNJ11	0.641791	1.44444	0.0185185
KCNJ5	KCNJ5	0.0720461	0.919308	0.00864553	KCNJ5	0.0783699	0.12	0.12	KCNJ5	0.0776398	11.3929	0.00872093
KCNK1	KCNK1	0.340741	0.577778	0.0814815	KCNK1	0.589744	0.23913	0.23913
KCNK3	KCNK3	0.384615	0.589744	0.025641	KCNK3	0.652174	0.0666667	0.0666667	KCNK3	0.625	1.4375	0.0263158
KCNN2	KCNN2	0.372807	0.578947	0.0482456	KCNN2	0.643939	0.129412	0.129412	KCNN2	0.594406	1.375	0.0506912
KCNN2_ENST00000512097	KCNN2_ENST00000512097	0.409091	0.539773	0.0511364	KCNN2_ENST00000512097	0.757895	0.125	0.125	KCNN2_ENST00000512097	0.692308	1.17284	0.0538922
KCNN4	KCNN4	0.378378	0.585586	0.036036	KCNN4	0.646154	0.0952381	0.0952381	KCNN4	0.608696	1.41304	0.0373832
KCNQ1	KCNQ1	0.368098	0.601227	0.0306748	KCNQ1	0.612245	0.0833333	0.0833333	KCNQ1	0.582524	1.50769	0.0316456
KCNQ1_ENST00000335475	KCNQ1_ENST00000335475	0.384058	0.57971	0.0362319	KCNQ1_ENST00000335475	0.6625	0.0943396	0.0943396	KCNQ1_ENST00000335475	0.623529	1.37931	0.037594
KCTD3	KCTD3	0.160221	0.723757	0.116022
KDM5A	KDM5A	0.101664	0.824399	0.0739372
KDM5A_ENST00000399788	KDM5A_ENST00000399788	0.101664	0.824399	0.0739372
KDM5C	KDM5C	0.121053	0.75614	0.122807
KDM5C_ENST00000452825	KDM5C_ENST00000452825	0.122845	0.758621	0.118534
KDM6A	KDM6A	0.127714	0.586207	0.286079	KDM6A	0.217865	2.24	2.24	KDM6A	0.146413	1.41667	0.400716
KDM6A_ENST00000377967	KDM6A_ENST00000377967	0.148359	0.592011	0.259629	KDM6A_ENST00000377967	0.250602	1.75	1.75	KDM6A_ENST00000377967	0.174204	1.45105	0.350674
KDM6A_ENST00000382899	KDM6A_ENST00000382899	0.151297	0.587896	0.260807	KDM6A_ENST00000382899	0.257353	1.72381	1.72381	KDM6A_ENST00000382899	0.178268	1.42657	0.352827
KEAP1	KEAP1	0.0797546	0.842025	0.0782209	KEAP1	0.0947177	0.980769	0.980769	KEAP1	0.0866667	5.3301	0.0848586
KIAA1267	KIAA1267	0.202206	0.672794	0.125	KIAA1267	0.300546	0.618182	0.618182
KIAA1731_ENST00000411936	KIAA1731_ENST00000411936	0.110599	0.797235	0.0921659
KIF25	KIF25	0.337748	0.589404	0.0728477
KIR3DL1_ENST00000402254									KIR3DL1_ENST00000402254	0.563636	1.6875	0.0117647
KIT	KIT	0.0980574	0.884366	0.0175763	KIT	0.110879	0.179245	0.179245
KLF4	KLF4	0.133641	0.857143	0.00921659
KLHDC8A	KLHDC8A	0.376	0.584	0.04	KLHDC8A	0.643836	0.106383	0.106383	KLHDC8A	0.602564	1.40385	0.0416667
KLHL14_ENST00000358095	KLHL14_ENST00000358095	0.384058	0.572464	0.0434783	KLHL14_ENST00000358095	0.670886	0.113208	0.113208	KLHL14_ENST00000358095	0.623529	1.33898	0.0454545
KLHL23	KLHL23	0.09	0.89	0.02	KLHL23	0.101124	0.222222	0.222222	KLHL23	0.0989011	8.09091	0.0204082
KLHL5	KLHL5	0.125	0.845238	0.0297619
KLHL5_ENST00000359687	KLHL5_ENST00000359687	0.118421	0.855263	0.0263158
KLHL5_ENST00000381930	KLHL5_ENST00000381930	0.121622	0.851351	0.027027
KLHL7	KLHL7	0.125	0.825	0.05
KLK15	KLK15	0.167832	0.825175	0.00699301
KLRAQ1	KLRAQ1	0.233333	0.633333	0.133333	KLRAQ1	0.368421	0.571429	0.571429	KLRAQ1	0.304348	1.72727	0.153846
KMO	KMO	0.131944	0.840278	0.0277778
KMT2C	KMT2C	0.111469	0.690926	0.197605	KMT2C	0.161333	1.77273	1.77273	KMT2C	0.125454	2.23547	0.246269
KMT2D	KMT2D	0.112883	0.661759	0.225358	KMT2D	0.170581	1.99638	1.99638	KMT2D	0.127248	1.95647	0.290919
KPNA5	KPNA5	0.132231	0.826446	0.0413223
KRAS	KRAS	0.00384579	0.995498	0.000656599	KRAS	0.00386319	0.170732	0.170732	KRAS	0.00386064	221.104	0.00065703
KRAS_ENST00000256078	KRAS_ENST00000256078	0.00743494	0.991945	0.000619579	KRAS_ENST00000256078	0.00749532	0.0833333	0.0833333	KRAS_ENST00000256078	0.00749064	123.154	0.000619963
KRI1	KRI1	0.345912	0.597484	0.0566038
KRT15	KRT15	0.372222	0.605556	0.0222222	KRT15	0.614679	0.0597015	0.0597015	KRT15	0.59292	1.53521	0.0227273
KRT82	KRT82	0.375	0.583333	0.0416667	KRT82	0.642857	0.111111	0.111111	KRT82	0.6	1.4	0.0434783
KRT85	KRT85	0.378698	0.597633	0.0236686	KRT85	0.633663	0.0625	0.0625	KRT85	0.609524	1.48529	0.0242424
KRTAP27-1					KRTAP27-1	0.590164	0.111111	0.111111
KRTAP5-4	KRTAP5-4	0.429752	0.570248	0	KRTAP5-4	0.753623	0	0	KRTAP5-4	0.753623	1.32692	0
LARGE_ENST00000452586	LARGE_ENST00000452586	0.168224	0.831776	0
LATS1_ENST00000253339	LATS1_ENST00000253339	0.0784314	0.775599	0.145969	LATS1_ENST00000253339	0.101124	1.86111	1.86111	LATS1_ENST00000253339	0.0851064	3.45631	0.170918
LATS1_ENST00000392273	LATS1_ENST00000392273	0.0881226	0.750958	0.16092	LATS1_ENST00000392273	0.117347	1.82609	1.82609	LATS1_ENST00000392273	0.0966387	3.01538	0.191781
LATS1_ENST00000543571	LATS1_ENST00000543571	0.0803571	0.770089	0.149554	LATS1_ENST00000543571	0.104348	1.86111	1.86111	LATS1_ENST00000543571	0.0873786	3.34951	0.175853
LCOR	LCOR	0.442623	0.532787	0.0245902	LCOR	0.830769	0.0555556	0.0555556	LCOR	0.794118	1.14035	0.0252101
LGR6_ENST00000255432					LGR6_ENST00000255432	0.610169	0.0972222	0.0972222	LGR6_ENST00000255432	0.576	1.49367	0.0368421
LGR6_ENST00000439764	LGR6_ENST00000439764	0.372549	0.581699	0.0457516	LGR6_ENST00000439764	0.640449	0.122807	0.122807	LGR6_ENST00000439764	0.59375	1.39063	0.0479452
LHFPL3	LHFPL3	0.428571	0.526786	0.0446429	LHFPL3	0.813559	0.104167	0.104167	LHFPL3	0.75	1.11321	0.046729
LHFPL3_ENST00000543266	LHFPL3_ENST00000543266	0.419048	0.542857	0.0380952	LHFPL3_ENST00000543266	0.77193	0.0909091	0.0909091	LHFPL3_ENST00000543266	0.721311	1.1875	0.039604
LHFPL5	LHFPL5	0.38835	0.592233	0.0194175	LHFPL5	0.655738	0.05	0.05	LHFPL5	0.634921	1.45238	0.019802
LIN54	LIN54	0.36019	0.597156	0.042654	LIN54	0.603175	0.118421	0.118421	LIN54	0.562963	1.48235	0.0445545
LINC00273	LINC00273	0.437956	0.547445	0.0145985	LINC00273	0.8	0.0333333	0.0333333	LINC00273	0.779221	1.20968	0.0148148
LINC00273_ENST00000539813	LINC00273_ENST00000539813	0.437956	0.547445	0.0145985	LINC00273_ENST00000539813	0.8	0.0333333	0.0333333	LINC00273_ENST00000539813	0.779221	1.20968	0.0148148
LMAN1	LMAN1	0.178218	0.653465	0.168317	LMAN1	0.272727	0.944444	0.944444	LMAN1	0.216867	1.88571	0.202381
LMX1B	LMX1B	0.385185	0.577778	0.037037	LMX1B	0.666667	0.0961538	0.0961538	LMX1B	0.626506	1.36842	0.0384615
LMX1B_ENST00000355497	LMX1B_ENST00000355497	0.382353	0.580882	0.0367647	LMX1B_ENST00000355497	0.658228	0.0961538	0.0961538	LMX1B_ENST00000355497	0.619048	1.38596	0.0381679
LMX1B_ENST00000373474	LMX1B_ENST00000373474	0.375	0.59375	0.03125	LMX1B_ENST00000373474	0.631579	0.0833333	0.0833333	LMX1B_ENST00000373474	0.6	1.46154	0.0322581
LRRC14B					LRRC14B	0.605634	0.0930233	0.0930233	LRRC14B	0.573333	1.51064	0.0350877
LRRC33	LRRC33	0.369668	0.611374	0.0189573	LRRC33	0.604651	0.0512821	0.0512821	LRRC33	0.586466	1.57317	0.0193237
LRRC52	LRRC52	0.344828	0.586207	0.0689655	LRRC52	0.588235	0.2	0.2
LRRC8A	LRRC8A	0.406091	0.563452	0.0304569	LRRC8A	0.720721	0.075	0.075	LRRC8A	0.683761	1.2907	0.0314136
LRRD1	LRRD1	0.08	0.81	0.11	LRRD1	0.0987654	1.375	1.375	LRRD1	0.0869565	4.26316	0.123596
LRRFIP2	LRRFIP2	0.184	0.704	0.112
LRRTM2	LRRTM2	0.402878	0.553957	0.0431655	LRRTM2	0.727273	0.107143	0.107143	LRRTM2	0.674699	1.24194	0.0451128
LUC7L2	LUC7L2	0.106195	0.716814	0.176991	LUC7L2	0.148148	1.66667	1.66667	LUC7L2	0.118812	2.53125	0.215054
LUC7L2_ENST00000263545	LUC7L2_ENST00000263545	0.0980392	0.745098	0.156863	LUC7L2_ENST00000263545	0.131579	1.6	1.6	LUC7L2_ENST00000263545	0.108696	2.92308	0.186047
LUC7L2_ENST00000541170	LUC7L2_ENST00000541170	0.108911	0.732673	0.158416	LUC7L2_ENST00000541170	0.148649	1.45455	1.45455	LUC7L2_ENST00000541170	0.122222	2.74074	0.188235
LUZP1	LUZP1	0.194872	0.682051	0.123077	LUZP1	0.285714	0.631579	0.631579
LUZP4	LUZP4	0.0948276	0.818966	0.0862069	LUZP4	0.115789	0.909091	0.909091	LUZP4	0.104762	4.52381	0.0943396
MALT1_ENST00000348428	MALT1_ENST00000348428	0.126316	0.757895	0.115789
MAML2					MAML2	0.59375	0.126316	0.126316
MAN1A2	MAN1A2	0.207692	0.638462	0.153846	MAN1A2	0.325301	0.740741	0.740741	MAN1A2	0.262136	1.76596	0.181818
MANEA	MANEA	0.0961538	0.836538	0.0673077	MANEA	0.114943	0.7	0.7
MAP2K1	MAP2K1	0.0772059	0.900735	0.0220588	MAP2K1	0.0857143	0.285714	0.285714	MAP2K1	0.0836653	9.07407	0.0225564
MAP2K4	MAP2K4	0.0802469	0.743827	0.175926	MAP2K4	0.107884	2.19231	2.19231	MAP2K4	0.0872483	2.90361	0.213483
MAP3K1_ENST00000399503	MAP3K1_ENST00000399503	0.094162	0.728814	0.177024	MAP3K1_ENST00000399503	0.129199	1.88	1.88	MAP3K1_ENST00000399503	0.10395	2.6875	0.215103
MAP4K1_ENST00000396857	MAP4K1_ENST00000396857	0.360577	0.596154	0.0432692	MAP4K1_ENST00000396857	0.604839	0.12	0.12	MAP4K1_ENST00000396857	0.56391	1.47619	0.0452261
MAP9	MAP9	0.143713	0.820359	0.0359281
MAPK1	MAPK1	0.136986	0.835616	0.0273973
MAPK13	MAPK13	0.411765	0.578431	0.00980392	MAPK13	0.711864	0.0238095	0.0238095	MAPK13	0.7	1.37209	0.00990099
MAPK9_ENST00000452135	MAPK9_ENST00000452135	0.148515	0.821782	0.029703
MARCH7	MARCH7	0.115702	0.818182	0.0661157
MATR3	MATR3	0.425	0.545833	0.0291667	MATR3	0.778626	0.0686275	0.0686275	MATR3	0.73913	1.20183	0.0300429
MAX	MAX	0.0571429	0.821429	0.121429	MAX	0.0695652	2.125	2.125	MAX	0.0606061	4.6	0.138211
MAX_ENST00000284165	MAX_ENST00000284165	0.0263158	0.850877	0.122807	MAX_ENST00000284165	0.0309278	4.66667	4.66667	MAX_ENST00000284165	0.027027	5.70588	0.14
MAX_ENST00000556979	MAX_ENST00000556979	0.0186916	0.850467	0.130841	MAX_ENST00000556979	0.021978	7	7	MAX_ENST00000556979	0.0190476	5.6875	0.150538
MBOAT1	MBOAT1	0.293578	0.59633	0.110092	MBOAT1	0.492308	0.375	0.375
MCHR2_ENST00000369212	MCHR2_ENST00000369212	0.35	0.585	0.065	MCHR2_ENST00000369212	0.598291	0.185714	0.185714
MCM6	MCM6	0.217391	0.664596	0.118012
MCM7	MCM7	0.26087	0.623188	0.115942	MCM7	0.418605	0.444444	0.444444
MCMDC2	MCMDC2	0.111888	0.832168	0.0559441
MCMDC2_ENST00000313616	MCMDC2_ENST00000313616	0.12	0.824	0.056
MCMDC2_ENST00000422365	MCMDC2_ENST00000422365	0.111888	0.832168	0.0559441
MDM2	MDM2	0.0958084	0.868263	0.0359281	MDM2	0.110345	0.375	0.375
MDM2_ENST00000462284	MDM2_ENST00000462284	0.101911	0.859873	0.0382166	MDM2_ENST00000462284	0.118519	0.375	0.375
MDM4	MDM4	0.127389	0.834395	0.0382166
MED12	MED12	0.0525533	0.923153	0.0242935	MED12	0.056928	0.462264	0.462264	MED12	0.0554683	12.0129	0.0248984
MED12_ENST00000333646	MED12_ENST00000333646	0.0917108	0.850088	0.0582011	MED12_ENST00000333646	0.107884	0.634615	0.634615	MED12_ENST00000333646	0.100971	5.67059	0.0617978
MED12_ENST00000374080	MED12_ENST00000374080	0.121573	0.822408	0.0560191
MEN1	MEN1	0.114583	0.664062	0.221354	MEN1	0.172549	1.93182	1.93182	MEN1	0.129412	1.97674	0.284281
MESP2	MESP2	0.405405	0.585586	0.00900901	MESP2	0.692308	0.0222222	0.0222222	MESP2	0.681818	1.41304	0.00909091
MFAP3L	MFAP3L	0.417323	0.566929	0.015748	MFAP3L	0.736111	0.0377358	0.0377358	MFAP3L	0.716216	1.30909	0.016
MGA	MGA	0.138286	0.682286	0.179429	MGA	0.20268	1.29752	1.29752	MGA	0.160477	2.14748	0.218663
MGAM	MGAM	0.175	0.708333	0.116667
MGAT4C_ENST00000393205	MGAT4C_ENST00000393205	0.148649	0.824324	0.027027
MLH1	MLH1	0.129032	0.683871	0.187097	MLH1	0.188679	1.45	1.45	MLH1	0.148148	2.16327	0.230159
MLL2_ENST00000301067	MLL2_ENST00000301067	0.122057	0.662088	0.215856	MLL2_ENST00000301067	0.184351	1.76849	1.76849	MLL2_ENST00000301067	0.139025	1.95935	0.275275
MLL3_ENST00000355193	MLL3_ENST00000355193	0.112722	0.694107	0.193171	MLL3_ENST00000355193	0.162399	1.71369	1.71369	MLL3_ENST00000355193	0.127043	2.26911	0.23942
MLL4	MLL4	0.215088	0.672552	0.11236
MLLT3	MLLT3	0.626866	0.354478	0.0186567	MLLT3	1.76842	0.0297619	0.0297619	MLLT3	1.68	0.549133	0.0190114
MLLT4_ENST00000392108	MLLT4_ENST00000392108	0.163435	0.720222	0.116343
MMP13	MMP13	0.165644	0.822086	0.0122699
MMP14	MMP14	0.408759	0.576642	0.0145985	MMP14	0.708861	0.0357143	0.0357143	MMP14	0.691358	1.36207	0.0148148
MORC4	MORC4	0.175676	0.695946	0.128378	MORC4	0.252427	0.730769	0.730769	MORC4	0.213115	2.28889	0.147287
MOS					MOS	0.606383	0.0877193	0.0877193	MOS	0.575758	1.51613	0.0331126
MPL	MPL	0.121622	0.831081	0.0472973
MPP5	MPP5	0.177966	0.70339	0.118644
MRGPRD									MRGPRD	0.558824	1.65	0.0192308
MRGPRX1	MRGPRX1	0.388	0.588	0.024	MRGPRX1	0.659864	0.0618557	0.0618557	MRGPRX1	0.633987	1.42718	0.0245902
MSH2	MSH2	0.122563	0.649025	0.228412	MSH2	0.188841	1.86364	1.86364	MSH2	0.139683	1.84921	0.296029
MSH6	MSH6	0.107527	0.744086	0.148387	MSH6	0.144509	1.38	1.38	MSH6	0.120482	2.90756	0.174242
MSL2	MSL2	0.434483	0.517241	0.0482759	MSL2	0.84	0.111111	0.111111	MSL2	0.768293	1.07143	0.0507246
MSN	MSN	0.369318	0.573864	0.0568182	MSN	0.643564	0.153846	0.153846	MSN	0.585586	1.34667	0.060241
MTF2	MTF2	0.125	0.759615	0.115385
MTMR2	MTMR2	0.23301	0.61165	0.15534	MTMR2	0.380952	0.666667	0.666667	MTMR2	0.303797	1.575	0.183908
MTMR2_ENST00000346299	MTMR2_ENST00000346299	0.238938	0.60177	0.159292	MTMR2_ENST00000346299	0.397059	0.666667	0.666667	MTMR2_ENST00000346299	0.313953	1.51111	0.189474
MTNR1A	MTNR1A	0.438356	0.527397	0.0342466	MTNR1A	0.831169	0.078125	0.078125	MTNR1A	0.780488	1.11594	0.035461
MTOR	MTOR	0.133215	0.824156	0.0426288
MYADM	MYADM	0.397059	0.602941	0	MYADM	0.658537	0	0	MYADM	0.658537	1.51852	0
MYC	MYC	0.159091	0.824675	0.0162338
MYC_ENST00000377970	MYC_ENST00000377970	0.160494	0.824074	0.0154321
MYCBP2_ENST00000360084	MYCBP2_ENST00000360084	0.186275	0.686275	0.127451	MYCBP2_ENST00000360084	0.271429	0.684211	0.684211
MYCL1_ENST00000397332	MYCL1_ENST00000397332	0.109091	0.818182	0.0727273
MYCN	MYCN	0.0909091	0.888112	0.020979	MYCN	0.102362	0.230769	0.230769	MYCN	0.1	7.9375	0.0214286
MYD88	MYD88	0.0309524	0.954762	0.0142857	MYD88	0.032419	0.461538	0.461538	MYD88	0.031941	21.1053	0.0144928
MYD88_ENST00000417037	MYD88_ENST00000417037	0.0992366	0.854962	0.0458015	MYD88_ENST00000417037	0.116071	0.461538	0.461538
N4BP2L2	N4BP2L2	0.135922	0.834951	0.0291262
NAA15	NAA15	0.115646	0.727891	0.156463	NAA15	0.158879	1.35294	1.35294	NAA15	0.130769	2.675	0.185484
NAA35	NAA35	0.106195	0.823009	0.0707965
NAPRT1_ENST00000276844	NAPRT1_ENST00000276844	0.205607	0.682243	0.11215
NAPRT1_ENST00000449291	NAPRT1_ENST00000449291	0.174757	0.708738	0.116505
NARFL	NARFL	0.423423	0.540541	0.036036	NARFL	0.783333	0.0851064	0.0851064	NARFL	0.734375	1.17647	0.0373832
NBN	NBN	0.108696	0.821739	0.0695652
NCK2	NCK2	0.380282	0.591549	0.028169	NCK2	0.642857	0.0740741	0.0740741	NCK2	0.613636	1.44828	0.0289855
NCK2_ENST00000233154	NCK2_ENST00000233154	0.372549	0.601307	0.0261438	NCK2_ENST00000233154	0.619565	0.0701754	0.0701754	NCK2_ENST00000233154	0.59375	1.5082	0.0268456
NCOR1	NCOR1	0.1323	0.709178	0.158522	NCOR1	0.186555	1.1982	1.1982	NCOR1	0.152473	2.43852	0.188385
NCOR1_ENST00000395851	NCOR1_ENST00000395851	0.132051	0.701282	0.166667	NCOR1_ENST00000395851	0.1883	1.26214	1.26214	NCOR1_ENST00000395851	0.152142	2.34764	0.2
NCOR1_ENST00000436828	NCOR1_ENST00000436828	0.0542636	0.75969	0.186047	NCOR1_ENST00000436828	0.0714286	3.42857	3.42857	NCOR1_ENST00000436828	0.057377	3.16129	0.228571
NDST1									NDST1	0.563492	1.62667	0.0207254
NDUFS1	NDUFS1	0.110169	0.847458	0.0423729
NEUROD6	NEUROD6	0.4329	0.515152	0.0519481	NEUROD6	0.840336	0.12	0.12	NEUROD6	0.763359	1.0625	0.0547945
NF1	NF1	0.101621	0.597257	0.301122	NF1	0.170146	2.96319	2.96319	NF1	0.113116	1.48297	0.430865
NF1_ENST00000358273	NF1_ENST00000358273	0.105449	0.619958	0.274593	NF1_ENST00000358273	0.170091	2.60403	2.60403	NF1_ENST00000358273	0.11788	1.63128	0.378537
NF1_ENST00000444181	NF1_ENST00000444181	0.0861244	0.626794	0.287081	NF1_ENST00000444181	0.137405	3.33333	3.33333	NF1_ENST00000444181	0.0942408	1.67949	0.402685
NF2	NF2	0.0433925	0.392505	0.564103	NF2	0.110553	13	13	NF2	0.0453608	0.646104	1.29412
NF2_ENST00000403999	NF2_ENST00000403999	0.0503597	0.564748	0.384892	NF2_ENST00000403999	0.089172	7.64286	7.64286	NF2_ENST00000403999	0.0530303	1.29752	0.625731
NFE2L1	NFE2L1	0.35503	0.585799	0.0591716	NFE2L1	0.606061	0.166667	0.166667
NFE2L2	NFE2L2	0.0409836	0.934426	0.0245902	NFE2L2	0.0438596	0.6	0.6	NFE2L2	0.042735	14.25	0.0252101
NFIX	NFIX	0.346774	0.596774	0.0564516
NFIX_ENST00000360105	NFIX_ENST00000360105	0.352459	0.590164	0.057377	NFIX_ENST00000360105	0.597222	0.162791	0.162791
NGFR	NGFR	0.374046	0.603053	0.0229008	NGFR	0.620253	0.0612245	0.0612245	NGFR	0.597561	1.51923	0.0234375
NGLY1_ENST00000428257	NGLY1_ENST00000428257	0.153285	0.722628	0.124088
NLRC3					NLRC3	0.592593	0.107143	0.107143	NLRC3	0.557214	1.52419	0.0398671
NMUR2	NMUR2	0.373134	0.604478	0.0223881	NMUR2	0.617284	0.06	0.06	NMUR2	0.595238	1.5283	0.0229008
NONO	NONO	0.103175	0.825397	0.0714286
NOTCH1	NOTCH1	0.111111	0.750765	0.138124	NOTCH1	0.147997	1.24312	1.24312	NOTCH1	0.125	3.01227	0.16026
NOTCH1_ENST00000277541	NOTCH1_ENST00000277541	0.115364	0.748787	0.135849	NOTCH1_ENST00000277541	0.154068	1.17757	1.17757	NOTCH1_ENST00000277541	0.130408	2.98069	0.157205
NOTCH2	NOTCH2	0.115044	0.762045	0.122911
NOTCH4	NOTCH4	0.119745	0.831847	0.0484076
NOVA1	NOVA1	0.431548	0.517857	0.0505952	NOVA1	0.833333	0.117241	0.117241	NOVA1	0.759162	1.07407	0.0532915
NPEPPS	NPEPPS	0.352201	0.584906	0.0628931	NPEPPS	0.602151	0.178571	0.178571
NPIPL3									NPIPL3	0.568627	1.66667	0.0126582
NPTX2	NPTX2	0.390244	0.597561	0.0121951	NPTX2	0.653061	0.03125	0.03125	NPTX2	0.64	1.48485	0.0123457
NRAS	NRAS	0.00759144	0.988958	0.00345066	NRAS	0.0076762	0.454545	0.454545	NRAS	0.00764951	89.5625	0.0034626
NSUN6	NSUN6	0.154545	0.681818	0.163636	NSUN6	0.226667	1.05882	1.05882	NSUN6	0.182796	2.14286	0.195652
NT5C2	NT5C2	0.139706	0.838235	0.0220588
NTNG2	NTNG2	0.396476	0.585903	0.0176211	NTNG2	0.676692	0.0444444	0.0444444	NTNG2	0.656934	1.41489	0.0179372
NTNG2_ENST00000360670	NTNG2_ENST00000360670	0.414747	0.56682	0.0184332	NTNG2_ENST00000360670	0.731707	0.0444444	0.0444444	NTNG2_ENST00000360670	0.708661	1.30851	0.0187793
NTNG2_ENST00000372179	NTNG2_ENST00000372179	0.43956	0.554945	0.00549451	NTNG2_ENST00000372179	0.792079	0.0125	0.0125	NTNG2_ENST00000372179	0.784314	1.24691	0.00552486
NTRK2	NTRK2	0.132653	0.82398	0.0433673
NTRK2_ENST00000304053	NTRK2_ENST00000304053	0.140351	0.828947	0.0307018
NTRK2_ENST00000376214	NTRK2_ENST00000376214	0.131234	0.824147	0.0446194
NTRK2_ENST00000395882	NTRK2_ENST00000395882	0.145251	0.826816	0.027933
NXF1	NXF1	0.21519	0.670886	0.113924
NXN	NXN	0.380952	0.587302	0.031746	NXN	0.648649	0.0833333	0.0833333	NXN	0.615385	1.42308	0.0327869
NXPE1	NXPE1	0.118056	0.854167	0.0277778
OFD1	OFD1	0.151376	0.733945	0.114679
OGT	OGT	0.125654	0.853403	0.0209424
OGT_ENST00000373719	OGT_ENST00000373719	0.132979	0.845745	0.0212766
OPRL1	OPRL1	0.424837	0.568627	0.00653595	OPRL1	0.747126	0.0153846	0.0153846	OPRL1	0.738636	1.31818	0.00657895
OPRM1_ENST00000414028	OPRM1_ENST00000414028	0.353448	0.577586	0.0689655	OPRM1_ENST00000414028	0.61194	0.195122	0.195122
OPRM1_ENST00000419506	OPRM1_ENST00000419506	0.324324	0.594595	0.0810811
OR10G7	OR10G7	0.375661	0.613757	0.010582	OR10G7	0.612069	0.028169	0.028169	OR10G7	0.601695	1.58904	0.0106952
OR10G8	OR10G8	0.38835	0.597087	0.0145631	OR10G8	0.650407	0.0375	0.0375	OR10G8	0.634921	1.48193	0.0147783
OR10H1	OR10H1	0.375	0.618056	0.00694444	OR10H1	0.606742	0.0185185	0.0185185	OR10H1	0.6	1.61818	0.00699301
OR10H2	OR10H2	0.407407	0.562963	0.0296296	OR10H2	0.723684	0.0727273	0.0727273	OR10H2	0.6875	1.28814	0.0305344
OR10P1									OR10P1	0.575342	1.7381	0
OR11G2	OR11G2	0.368421	0.573684	0.0578947	OR11G2	0.642202	0.157143	0.157143	OR11G2	0.583333	1.34568	0.0614525
OR1C1	OR1C1	0.383085	0.59204	0.0248756	OR1C1	0.647059	0.0649351	0.0649351	OR1C1	0.620968	1.45122	0.0255102
OR1F1	OR1F1	0.386861	0.605839	0.00729927	OR1F1	0.638554	0.0188679	0.0188679	OR1F1	0.630952	1.53704	0.00735294
OR1G1	OR1G1	0.396226	0.603774	0	OR1G1	0.65625	0	0	OR1G1	0.65625	1.52381	0
OR2A12	OR2A12	0.380117	0.590643	0.0292398	OR2A12	0.643564	0.0769231	0.0769231	OR2A12	0.613208	1.44286	0.0301205
OR2A2	OR2A2	0.40678	0.570621	0.0225989	OR2A2	0.712871	0.0555556	0.0555556	OR2A2	0.685714	1.32895	0.0231214
OR2A5	OR2A5	0.384259	0.606481	0.00925926	OR2A5	0.633588	0.0240964	0.0240964	OR2A5	0.62406	1.54118	0.00934579
OR2B11	OR2B11	0.383234	0.57485	0.0419162	OR2B11	0.666667	0.109375	0.109375	OR2B11	0.621359	1.35211	0.04375
OR2C1	OR2C1	0.385321	0.605505	0.00917431	OR2C1	0.636364	0.0238095	0.0238095	OR2C1	0.626866	1.53488	0.00925926
OR2L1P	OR2L1P	0.367925	0.622642	0.00943396	OR2L1P	0.590909	0.025641	0.025641	OR2L1P	0.58209	1.65	0.00952381
OR2T34	OR2T34	0.384615	0.589744	0.025641	OR2T34	0.652174	0.0666667	0.0666667	OR2T34	0.625	1.4375	0.0263158
OR2T4	OR2T4	0.356589	0.593023	0.0503876	OR2T4	0.601307	0.141304	0.141304
OR2W3	OR2W3	0.372197	0.605381	0.0224215	OR2W3	0.614815	0.060241	0.060241	OR2W3	0.592857	1.53409	0.0229358
OR2Y1					OR2Y1	0.590909	0.0769231	0.0769231	OR2Y1	0.565217	1.57143	0.0285714
OR3A4	OR3A4	0.377358	0.613208	0.00943396	OR3A4	0.615385	0.025	0.025	OR3A4	0.606061	1.58537	0.00952381
OR4C3	OR4C3	0.40099	0.574257	0.0247525	OR4C3	0.698276	0.0617284	0.0617284	OR4C3	0.669421	1.34884	0.0253807
OR4D1	OR4D1	0.409091	0.536364	0.0545455	OR4D1	0.762712	0.133333	0.133333	OR4D1	0.692308	1.15686	0.0576923
OR4X2	OR4X2	0.417112	0.566845	0.0160428	OR4X2	0.735849	0.0384615	0.0384615	OR4X2	0.715596	1.30864	0.0163043
OR5AK2	OR5AK2	0.405797	0.586957	0.00724638	OR5AK2	0.691358	0.0178571	0.0178571	OR5AK2	0.682927	1.42105	0.00729927
OR5AU1					OR5AU1	0.590909	0.0512821	0.0512821	OR5AU1	0.573529	1.60976	0.0190476
OR5B2					OR5B2	0.5875	0.0425532	0.0425532	OR5B2	0.573171	1.63265	0.015748
OR5M10					OR5M10	0.586207	0.0980392	0.0980392
OR6C65	OR6C65	0.373984	0.601626	0.0243902	OR6C65	0.621622	0.0652174	0.0652174	OR6C65	0.597403	1.5102	0.025
OR6M1	OR6M1	0.395522	0.567164	0.0373134	OR6M1	0.697368	0.0943396	0.0943396	OR6M1	0.654321	1.31034	0.0387597
OR8B12	OR8B12	0.378882	0.614907	0.00621118	OR8B12	0.616162	0.0163934	0.0163934	OR8B12	0.61	1.59677	0.00625
OR9A4	OR9A4	0.352273	0.596591	0.0511364	OR9A4	0.590476	0.145161	0.145161
OR9G1	OR9G1	0.328244	0.59542	0.0763359
OTX1	OTX1	0.368	0.608	0.024	OTX1	0.605263	0.0652174	0.0652174	OTX1	0.582278	1.55102	0.0245902
OTX2	OTX2	0.355705	0.577181	0.0671141	OTX2	0.616279	0.188679	0.188679
P2RY2					P2RY2	0.586207	0.0784314	0.0784314	P2RY2	0.56044	1.58182	0.0289855
PACSIN2	PACSIN2	0.4	0.530769	0.0692308	PACSIN2	0.753623	0.173077	0.173077	PACSIN2	0.666667	1.13115	0.0743802
PAN3	PAN3	0.19375	0.6875	0.11875
PAN3_ENST00000380958	PAN3_ENST00000380958	0.178771	0.703911	0.117318
PAOX_ENST00000357296	PAOX_ENST00000357296	0.372727	0.6	0.0272727	PAOX_ENST00000357296	0.621212	0.0731707	0.0731707	PAOX_ENST00000357296	0.594203	1.5	0.0280374
PARN	PARN	0.110092	0.834862	0.0550459
PARN_ENST00000437198	PARN_ENST00000437198	0.104762	0.838095	0.0571429
PBRM1	PBRM1	0.0651659	0.61019	0.324645	PBRM1	0.106796	4.98182	4.98182	PBRM1	0.0697085	1.56535	0.480702
PBRM1_ENST00000296302	PBRM1_ENST00000296302	0.0722611	0.629371	0.298368	PBRM1_ENST00000296302	0.114815	4.12903	4.12903	PBRM1_ENST00000296302	0.0778894	1.69811	0.425249
PBRM1_ENST00000356770	PBRM1_ENST00000356770	0.0734745	0.627646	0.298879	PBRM1_ENST00000356770	0.117063	4.0678	4.0678	PBRM1_ENST00000356770	0.0793011	1.68562	0.426288
PCDHA11	PCDHA11	0.370656	0.600386	0.0289575	PCDHA11	0.617363	0.078125	0.078125	PCDHA11	0.588957	1.50242	0.0298211
PCDHA9	PCDHA9	0.389961	0.594595	0.015444	PCDHA9	0.655844	0.039604	0.039604	PCDHA9	0.639241	1.46667	0.0156863
PCDHA9_ENST00000532602	PCDHA9_ENST00000532602	0.371622	0.611486	0.0168919	PCDHA9_ENST00000532602	0.607735	0.0454545	0.0454545	PCDHA9_ENST00000532602	0.591398	1.57391	0.0171821
PCDHB18	PCDHB18	0.459893	0.518717	0.0213904	PCDHB18	0.886598	0.0465116	0.0465116	PCDHB18	0.851485	1.07778	0.0218579
PCDHGA12	PCDHGA12	0.389034	0.608355	0.00261097	PCDHGA12	0.639485	0.00671141	0.00671141	PCDHGA12	0.636752	1.55333	0.0026178
PCDHGA12_ENST00000252085	PCDHGA12_ENST00000252085	0.388021	0.609375	0.00260417	PCDHGA12_ENST00000252085	0.636752	0.00671141	0.00671141	PCDHGA12_ENST00000252085	0.634043	1.56	0.00261097
PCDHGA3	PCDHGA3	0.365	0.5975	0.0375	PCDHGA3	0.610879	0.10274	0.10274	PCDHGA3	0.574803	1.48447	0.038961
PCDHGA3_ENST00000253812	PCDHGA3_ENST00000253812	0.37156	0.594037	0.0344037	PCDHGA3_ENST00000253812	0.625483	0.0925926	0.0925926	PCDHGA3_ENST00000253812	0.591241	1.46328	0.0356295
PCDHGA5									PCDHGA5	0.564286	1.63855	0.0186047
PCDHGA5_ENST00000518069									PCDHGA5_ENST00000518069	0.562724	1.65854	0.016317
PCDHGA9	PCDHGA9	0.362963	0.596296	0.0407407	PCDHGA9	0.608696	0.112245	0.112245	PCDHGA9	0.569767	1.47706	0.042471
PCDHGA9_ENST00000573521	PCDHGA9_ENST00000573521	0.362963	0.596296	0.0407407	PCDHGA9_ENST00000573521	0.608696	0.112245	0.112245	PCDHGA9_ENST00000573521	0.569767	1.47706	0.042471
PCDHGB1	PCDHGB1	0.36802	0.609137	0.0228426	PCDHGB1	0.604167	0.062069	0.062069	PCDHGB1	0.582329	1.55844	0.0233766
PCDHGB1_ENST00000523390	PCDHGB1_ENST00000523390	0.370558	0.609137	0.0203046	PCDHGB1_ENST00000523390	0.608333	0.0547945	0.0547945	PCDHGB1_ENST00000523390	0.58871	1.55844	0.0207254
PDE6B					PDE6B	0.594937	0.0744681	0.0744681	PDE6B	0.569697	1.56436	0.0277778
PDS5A	PDS5A	0.139442	0.820717	0.0398406
PDS5B	PDS5B	0.174216	0.710801	0.114983
PGC	PGC	0.370968	0.596774	0.0322581	PGC	0.621622	0.0869565	0.0869565	PGC	0.589744	1.48	0.0333333
PHACTR2	PHACTR2	0.137405	0.832061	0.0305344
PHF6	PHF6	0.0632911	0.626582	0.310127	PHF6	0.10101	4.9	4.9	PHF6	0.0675676	1.67797	0.449541
PHF6_ENST00000332070	PHF6_ENST00000332070	0.0787402	0.637795	0.283465	PHF6_ENST00000332070	0.123457	3.6	3.6	PHF6_ENST00000332070	0.0854701	1.76087	0.395604
PIAS2	PIAS2	0.110294	0.867647	0.0220588
PIAS2_ENST00000324794	PIAS2_ENST00000324794	0.139344	0.836066	0.0245902
PIGG_ENST00000453061									PIGG_ENST00000453061	0.567901	1.76087	0
PIK3C2G	PIK3C2G	0.12202	0.824684	0.0532959
PIK3C2G_ENST00000433979	PIK3C2G_ENST00000433979	0.119488	0.823613	0.056899
PIK3C2G_ENST00000538779	PIK3C2G_ENST00000538779	0.0912698	0.859127	0.0496032	PIK3C2G_ENST00000538779	0.106236	0.543478	0.543478	PIK3C2G_ENST00000538779	0.100437	6.09859	0.0521921
PIK3CA	PIK3CA	0.0101045	0.98373	0.00616544	PIK3CA	0.0102716	0.610169	0.610169	PIK3CA	0.0102076	60.4632	0.00620369
PIK3CA_ENST00000263967	PIK3CA_ENST00000263967	0.0103749	0.98208	0.00754539	PIK3CA_ENST00000263967	0.0105642	0.727273	0.727273	PIK3CA_ENST00000263967	0.0104837	54.8026	0.00760276
PIK3CB	PIK3CB	0.113314	0.82153	0.0651558
PIK3R1	PIK3R1	0.0573248	0.700637	0.242038	PIK3R1	0.0818182	4.22222	4.22222	PIK3R1	0.0608108	2.34043	0.319328
PIK3R1_ENST00000320694	PIK3R1_ENST00000320694	0.0412979	0.713864	0.244838	PIK3R1_ENST00000320694	0.0578512	5.92857	5.92857	PIK3R1_ENST00000320694	0.0430769	2.49485	0.324219
PIK3R1_ENST00000336483	PIK3R1_ENST00000336483	0.0410557	0.715543	0.243402	PIK3R1_ENST00000336483	0.057377	5.92857	5.92857	PIK3R1_ENST00000336483	0.0428135	2.51546	0.321705
PIK3R3	PIK3R3	0.0705128	0.826923	0.102564	PIK3R3	0.0852713	1.45455	1.45455	PIK3R3	0.0758621	4.77778	0.114286
PIK3R3_ENST00000540385	PIK3R3_ENST00000540385	0.0775862	0.775862	0.146552	PIK3R3_ENST00000540385	0.1	1.88889	1.88889	PIK3R3_ENST00000540385	0.0841121	3.46154	0.171717
PITRM1_ENST00000451104	PITRM1_ENST00000451104	0.157609	0.820652	0.0217391
PKD2	PKD2	0.21547	0.657459	0.127072	PKD2	0.327731	0.589744	0.589744
PKN2	PKN2	0.104046	0.82659	0.0693642
PLBD2	PLBD2	0.382609	0.556522	0.0608696	PLBD2	0.6875	0.159091	0.159091	PLBD2	0.619718	1.2549	0.0648148
PLCG1	PLCG1	0.15	0.822	0.028
PLEKHS1	PLEKHS1	0.138889	0.824074	0.037037
PLK2	PLK2	0.102222	0.8	0.0977778
PLUNC	PLUNC	0.39823	0.566372	0.0353982	PLUNC	0.703125	0.0888889	0.0888889	PLUNC	0.661765	1.30612	0.0366972
PMS1	PMS1	0.106383	0.787234	0.106383
PNCK_ENST00000370145	PNCK_ENST00000370145	0.415094	0.575472	0.00943396	PNCK_ENST00000370145	0.721311	0.0227273	0.0227273	PNCK_ENST00000370145	0.709677	1.35556	0.00952381
PNCK_ENST00000393831	PNCK_ENST00000393831	0.415929	0.575221	0.00884956	PNCK_ENST00000393831	0.723077	0.0212766	0.0212766	PNCK_ENST00000393831	0.712121	1.35417	0.00892857
PNCK_ENST00000447676	PNCK_ENST00000447676	0.389831	0.576271	0.0338983	PNCK_ENST00000447676	0.676471	0.0869565	0.0869565	PNCK_ENST00000447676	0.638889	1.36	0.0350877
PNISR	PNISR	0.118012	0.73913	0.142857	PNISR	0.159664	1.21053	1.21053	PNISR	0.133803	2.83333	0.166667
PNKP	PNKP	0.383929	0.571429	0.0446429	PNKP	0.671875	0.116279	0.116279	PNKP	0.623188	1.33333	0.046729
PNKP_ENST00000322344	PNKP_ENST00000322344	0.387387	0.567568	0.045045	PNKP_ENST00000322344	0.68254	0.116279	0.116279	PNKP_ENST00000322344	0.632353	1.3125	0.0471698
PNMAL2_ENST00000599531	PNMAL2_ENST00000599531	0.369318	0.602273	0.0284091	PNMAL2_ENST00000599531	0.613208	0.0769231	0.0769231	PNMAL2_ENST00000599531	0.585586	1.51429	0.0292398
POLG2	POLG2	0.128713	0.851485	0.019802
POT1	POT1	0.108209	0.809701	0.0820896
POT1_ENST00000357628	POT1_ENST00000357628	0.111111	0.813492	0.0753968
POTEM_ENST00000551509	POTEM_ENST00000551509	0.140845	0.838028	0.0211268
PPHLN1_ENST00000432191	PPHLN1_ENST00000432191	0.129032	0.830645	0.0403226
PPM1D	PPM1D	0.110132	0.594714	0.295154	PPM1D	0.185185	2.68	2.68	PPM1D	0.123762	1.46739	0.41875
PPP1R21	PPP1R21	0.227586	0.641379	0.131034	PPP1R21	0.354839	0.575758	0.575758	PPP1R21	0.294643	1.78846	0.150794
PPP2R1A	PPP2R1A	0.0997732	0.875283	0.0249433	PPP2R1A	0.11399	0.25	0.25
PPP2R3B	PPP2R3B	0.490196	0.496732	0.0130719	PPP2R3B	0.986842	0.0266667	0.0266667	PPP2R3B	0.961538	0.987013	0.013245
PPP2R3B_ENST00000390665	PPP2R3B_ENST00000390665	0.486842	0.5	0.0131579	PPP2R3B_ENST00000390665	0.973684	0.027027	0.027027	PPP2R3B_ENST00000390665	0.948718	1	0.0133333
PPP6C	PPP6C	0.0823529	0.794118	0.123529	PPP6C	0.103704	1.5	1.5	PPP6C	0.0897436	3.85714	0.14094
PPP6C_ENST00000451402	PPP6C_ENST00000451402	0.0787879	0.8	0.121212	PPP6C_ENST00000451402	0.0984848	1.53846	1.53846	PPP6C_ENST00000451402	0.0855263	4	0.137931
PRAM1									PRAM1	0.576271	1.73529	0
PRAMEF2	PRAMEF2	0.375	0.590909	0.0340909	PRAMEF2	0.634615	0.0909091	0.0909091	PRAMEF2	0.6	1.44444	0.0352941
PRB3	PRB3	0.0533333	0.906667	0.04	PRB3	0.0588235	0.75	0.75	PRB3	0.056338	9.71429	0.0416667
PRB3_ENST00000538488	PRB3_ENST00000538488	0.0671141	0.885906	0.0469799	PRB3_ENST00000538488	0.0757576	0.7	0.7	PRB3_ENST00000538488	0.0719424	7.76471	0.0492958
PREPL	PREPL	0.11811	0.850394	0.0314961
PRF1	PRF1	0.383333	0.594444	0.0222222	PRF1	0.64486	0.057971	0.057971	PRF1	0.621622	1.46575	0.0227273
PRKACG	PRKACG	0.409091	0.590909	0	PRKACG	0.692308	0	0	PRKACG	0.692308	1.44444	0
PRKAR1A	PRKAR1A	0.166667	0.717391	0.115942
PRKAR1B	PRKAR1B	0.372727	0.590909	0.0363636	PRKAR1B	0.630769	0.097561	0.097561	PRKAR1B	0.594203	1.44444	0.0377358
PRKCI	PRKCI	0.0987654	0.851852	0.0493827	PRKCI	0.115942	0.5	0.5
PRL	PRL	0.35	0.59	0.06	PRL	0.59322	0.171429	0.171429
PRLHR	PRLHR	0.416149	0.571429	0.0124224	PRLHR	0.728261	0.0298507	0.0298507	PRLHR	0.712766	1.33333	0.0125786
PROM2					PROM2	0.590604	0.0909091	0.0909091	PROM2	0.56051	1.55208	0.0337553
PRR23C									PRR23C	0.567568	1.63636	0.0175439
PRR5	PRR5	0.37963	0.583333	0.037037	PRR5	0.650794	0.097561	0.097561	PRR5	0.61194	1.4	0.0384615
PRR5_ENST00000403581	PRR5_ENST00000403581	0.366071	0.5625	0.0714286	PRR5_ENST00000403581	0.650794	0.195122	0.195122	PRR5_ENST00000403581	0.577465	1.28571	0.0769231
PRR5-ARHGAP8	PRR5-ARHGAP8	0.368421	0.596491	0.0350877	PRR5-ARHGAP8	0.617647	0.0952381	0.0952381	PRR5-ARHGAP8	0.583333	1.47826	0.0363636
PRSS38	PRSS38	0.378378	0.560811	0.0608108	PRSS38	0.674699	0.160714	0.160714	PRSS38	0.608696	1.27692	0.0647482
PSAPL1_ENST00000319098	PSAPL1_ENST00000319098	0.424528	0.518868	0.0566038	PSAPL1_ENST00000319098	0.818182	0.133333	0.133333	PSAPL1_ENST00000319098	0.737705	1.07843	0.06
PSEN2	PSEN2	0.385321	0.59633	0.0183486	PSEN2	0.646154	0.047619	0.047619	PSEN2	0.626866	1.47727	0.0186916
PSIP1_ENST00000380733	PSIP1_ENST00000380733	0.162162	0.648649	0.189189	PSIP1_ENST00000380733	0.25	1.16667	1.16667	PSIP1_ENST00000380733	0.193548	1.84615	0.233333
PSPC1	PSPC1	0.112903	0.822581	0.0645161
PTCH1	PTCH1	0.16206	0.670854	0.167085	PTCH1	0.241573	1.03101	1.03101	PTCH1	0.193403	2.03817	0.200603
PTEN	PTEN	0.0194772	0.697078	0.283444	PTEN	0.0279412	14.5526	14.5526	PTEN	0.0198641	2.30118	0.395565
PTPN11	PTPN11	0.0910816	0.880455	0.028463	PTPN11	0.103448	0.3125	0.3125	PTPN11	0.100209	7.36508	0.0292969
PTPN2	PTPN2	0.148515	0.70297	0.148515	PTPN2	0.211268	1	1	PTPN2	0.174419	2.36667	0.174419
PTPRS_ENST00000262963	PTPRS_ENST00000262963	0.0865385	0.887019	0.0264423	PTPRS_ENST00000262963	0.097561	0.305556	0.305556	PTPRS_ENST00000262963	0.0947368	7.85106	0.0271605
PTPRU_ENST00000323874	PTPRU_ENST00000323874	0.175	0.825	0
PTX4					PTX4	0.591837	0.0689655	0.0689655	PTX4	0.568627	1.58065	0.025641
PUF60					PUF60	0.585714	0.0243902	0.0243902	PUF60	0.577465	1.66667	0.00900901
QSOX1					QSOX1	0.605263	0.0724638	0.0724638	QSOX1	0.579832	1.54054	0.0273224
RAC1	RAC1	0.101796	0.892216	0.00598802	RAC1	0.114094	0.0588235	0.0588235	RAC1	0.113333	8.27778	0.0060241
RAC1_ENST00000356142	RAC1_ENST00000356142	0.115854	0.878049	0.00609756
RAD21	RAD21	0.105839	0.755474	0.138686	RAD21	0.140097	1.31034	1.31034	RAD21	0.118367	3.08955	0.161017
RAD50	RAD50	0.0909091	0.824047	0.085044	RAD50	0.11032	0.935484	0.935484	RAD50	0.1	4.68333	0.0929487
RAD50_ENST00000265335	RAD50_ENST00000265335	0.0861619	0.835509	0.078329	RAD50_ENST00000265335	0.103125	0.909091	0.909091	RAD50_ENST00000265335	0.0942857	5.07937	0.0849858
RAD51B_ENST00000487270	RAD51B_ENST00000487270	0.141509	0.820755	0.0377358
RAD54B	RAD54B	0.180645	0.683871	0.135484	RAD54B	0.264151	0.75	0.75	RAD54B	0.220472	2.16327	0.156716
RAF1	RAF1	0.125448	0.835125	0.0394265
RAF1_ENST00000442415	RAF1_ENST00000442415	0.12963	0.82963	0.0407407
RARA	RARA	0.125	0.865741	0.00925926
RARA_ENST00000394081	RARA_ENST00000394081	0.112299	0.877005	0.0106952
RARS	RARS	0.176	0.712	0.112
RASA1	RASA1	0.0758294	0.718009	0.206161	RASA1	0.105611	2.71875	2.71875	RASA1	0.0820513	2.54622	0.259701
RASA1_ENST00000456692	RASA1_ENST00000456692	0.0791557	0.704485	0.216359	RASA1_ENST00000456692	0.11236	2.73333	2.73333	RASA1_ENST00000456692	0.0859599	2.38393	0.276094
RB1	RB1	0.0442584	0.399522	0.55622	RB1	0.110778	12.5676	12.5676	RB1	0.0463079	0.665339	1.25337
RB1_ENST00000267163	RB1_ENST00000267163	0.0495751	0.413598	0.536827	RB1_ENST00000267163	0.119863	10.8286	10.8286	RB1_ENST00000267163	0.052161	0.705314	1.15902
RBBP5	RBBP5	0.193277	0.655462	0.151261	RBBP5	0.294872	0.782609	0.782609	RBBP5	0.239583	1.90244	0.178218
RBM10	RBM10	0.0760456	0.589354	0.334601	RBM10	0.129032	4.4	4.4	RBM10	0.0823045	1.43519	0.502857
RBM25	RBM25	0.137755	0.831633	0.0306122
RBM4	RBM4	0.401639	0.590164	0.00819672	RBM4	0.680556	0.0204082	0.0204082	RBM4	0.671233	1.44	0.00826446
RBM45	RBM45	0.211538	0.673077	0.115385
RBM46	RBM46	0.193878	0.658163	0.147959	RBM46	0.294574	0.763158	0.763158	RBM46	0.240506	1.92537	0.173653
RBPJ	RBPJ	0.257812	0.609375	0.132812	RBPJ	0.423077	0.515152	0.515152	RBPJ	0.347368	1.56	0.153153
RBPJ_ENST00000348160	RBPJ_ENST00000348160	0.260504	0.596639	0.142857	RBPJ_ENST00000348160	0.43662	0.548387	0.548387	RBPJ_ENST00000348160	0.352273	1.47917	0.166667
RECQL4	RECQL4	0.110795	0.866477	0.0227273
REL	REL	0.112994	0.847458	0.039548
RET	RET	0.133464	0.839058	0.0274779
RGR	RGR	0.44	0.54	0.02	RGR	0.814815	0.0454545	0.0454545	RGR	0.785714	1.17391	0.0204082
RHO									RHO	0.566265	1.65306	0.015625
RHOA	RHOA	0.0487013	0.941558	0.00974026	RHOA	0.0517241	0.2	0.2	RHOA	0.0511945	16.1111	0.00983607
RICTOR_ENST00000296782	RICTOR_ENST00000296782	0.11976	0.818363	0.0618762
RIOK2	RIOK2	0.110169	0.805085	0.0847458
RIOK3	RIOK3	0.165289	0.826446	0.00826446
RIT1	RIT1	0.0917431	0.853211	0.0550459	RIT1	0.107527	0.6	0.6	RIT1	0.10101	5.8125	0.0582524
RNF111	RNF111	0.142857	0.729064	0.128079					RNF111	0.166667	2.69091	0.146893
RNF111_ENST00000434298	RNF111_ENST00000434298	0.142132	0.736041	0.121827
RNF19A	RNF19A	0.147727	0.829545	0.0227273
RNF20	RNF20	0.174157	0.707865	0.117978
RNF43	RNF43	0.0889831	0.680085	0.230932	RNF43	0.130841	2.59524	2.59524	RNF43	0.0976744	2.12583	0.300275
RNF6	RNF6	0.161074	0.677852	0.161074	RNF6	0.237624	1	1	RNF6	0.192	2.10417	0.192
RP11-368J21.2					RP11-368J21.2	0.587413	0.0238095	0.0238095	RP11-368J21.2	0.57931	1.66279	0.00881057
RP11-368J21.2_ENST00000424340	RP11-368J21.2_ENST00000424340	0.368421	0.622807	0.00877193	RP11-368J21.2_ENST00000424340	0.591549	0.0238095	0.0238095	RP11-368J21.2_ENST00000424340	0.583333	1.65116	0.00884956
RP3-402G11_5	RP3-402G11_5	0.387387	0.576577	0.036036	RP3-402G11_5	0.671875	0.0930233	0.0930233	RP3-402G11_5	0.632353	1.3617	0.0373832
RPN2	RPN2	0.383929	0.544643	0.0714286	RPN2	0.704918	0.186047	0.186047	RPN2	0.623188	1.19608	0.0769231
RPS6KL1	RPS6KL1	0.366337	0.594059	0.039604	RPS6KL1	0.616667	0.108108	0.108108	RPS6KL1	0.578125	1.46341	0.0412371
RSF1	RSF1	0.155235	0.729242	0.115523
RSL1D1	RSL1D1	0.106195	0.867257	0.0265487
RSRC2	RSRC2	0.135135	0.738739	0.126126
RTDR1	RTDR1	0.409091	0.563636	0.0272727	RTDR1	0.725806	0.0666667	0.0666667	RTDR1	0.692308	1.29167	0.0280374
RTKN2_ENST00000395265	RTKN2_ENST00000395265	0.233333	0.625	0.141667	RTKN2_ENST00000395265	0.373333	0.607143	0.607143	RTKN2_ENST00000395265	0.304348	1.66667	0.165049
RTN4RL1	RTN4RL1	0.377049	0.598361	0.0245902	RTN4RL1	0.630137	0.0652174	0.0652174	RTN4RL1	0.605263	1.4898	0.0252101
RUNX1	RUNX1	0.1	0.776316	0.123684
RUNX1_ENST00000325074	RUNX1_ENST00000325074	0.0364964	0.875912	0.0875912	RUNX1_ENST00000325074	0.0416667	2.4	2.4	RUNX1_ENST00000325074	0.0378788	7.05882	0.096
RUNX1_ENST00000344691	RUNX1_ENST00000344691	0.035461	0.879433	0.0851064	RUNX1_ENST00000344691	0.0403226	2.4	2.4	RUNX1_ENST00000344691	0.0367647	7.29412	0.0930233
RUNX1_ENST00000486278	RUNX1_ENST00000486278	0.0479042	0.856287	0.0958084	RUNX1_ENST00000486278	0.0559441	2	2	RUNX1_ENST00000486278	0.0503145	5.95833	0.10596
RUNX2	RUNX2	0.507246	0.444444	0.0483092	RUNX2	1.1413	0.0952381	0.0952381	RUNX2	1.02941	0.8	0.0507614
RUNX2_ENST00000352853	RUNX2_ENST00000352853	0.511848	0.440758	0.0473934	RUNX2_ENST00000352853	1.16129	0.0925926	0.0925926	RUNX2_ENST00000352853	1.04854	0.788136	0.0497512
S1PR3	S1PR3	0.375	0.601562	0.0234375	S1PR3	0.623377	0.0625	0.0625	S1PR3	0.6	1.5098	0.024
S1PR5									S1PR5	0.569444	1.7561	0
SAG	SAG	0.141509	0.830189	0.0283019
SAG_ENST00000409110	SAG_ENST00000409110	0.137615	0.834862	0.0275229
SAMSN1	SAMSN1	0.179012	0.697531	0.123457
SAMSN1_ENST00000285670	SAMSN1_ENST00000285670	0.188679	0.672956	0.138365	SAMSN1_ENST00000285670	0.280374	0.733333	0.733333	SAMSN1_ENST00000285670	0.232558	2.05769	0.160584
SARDH					SARDH	0.596774	0.108108	0.108108	SARDH	0.560606	1.5122	0.040404
SARDH_ENST00000371868	SARDH_ENST00000371868	0.396396	0.585586	0.018018	SARDH_ENST00000371868	0.676923	0.0454545	0.0454545	SARDH_ENST00000371868	0.656716	1.41304	0.0183486
SASS6	SASS6	0.191304	0.695652	0.113043
SBK1_ENST00000341901	SBK1_ENST00000341901	0.411765	0.563025	0.0252101	SBK1_ENST00000341901	0.731343	0.0612245	0.0612245	SBK1_ENST00000341901	0.7	1.28846	0.0258621
SCAF4	SCAF4	0.156352	0.71987	0.123779
SEC14L4	SEC14L4	0.369748	0.596639	0.0336134	SEC14L4	0.619718	0.0909091	0.0909091	SEC14L4	0.586667	1.47917	0.0347826
SELL_ENST00000236147	SELL_ENST00000236147	0.31405	0.595041	0.0909091
SENP6	SENP6	0.207447	0.659574	0.132979	SENP6	0.314516	0.641026	0.641026	SENP6	0.261745	1.9375	0.153374
SENP6_ENST00000370014	SENP6_ENST00000370014	0.21118	0.658385	0.130435	SENP6_ENST00000370014	0.320755	0.617647	0.617647	SENP6_ENST00000370014	0.267717	1.92727	0.15
SENP6_ENST00000447266	SENP6_ENST00000447266	0.220339	0.655367	0.124294	SENP6_ENST00000447266	0.336207	0.564103	0.564103
SERPINA4	SERPINA4	0.343195	0.573964	0.0828402	SERPINA4	0.597938	0.241379	0.241379
SERPINA5	SERPINA5	0.372671	0.596273	0.0310559	SERPINA5	0.625	0.0833333	0.0833333	SERPINA5	0.594059	1.47692	0.0320513
SERPINA6									SERPINA6	0.566265	1.65306	0.015625
SETD2	SETD2	0.0634921	0.67619	0.260317	SETD2	0.0938967	4.1	4.1	SETD2	0.0677966	2.08824	0.351931
SETD2_ENST00000409792	SETD2_ENST00000409792	0.0682243	0.670093	0.261682	SETD2_ENST00000409792	0.101813	3.83562	3.83562	SETD2_ENST00000409792	0.0732197	2.03116	0.35443
SF3B1	SF3B1	0.0430108	0.945409	0.0115798	SF3B1	0.0454943	0.269231	0.269231	SF3B1	0.0449438	17.3182	0.0117155
SGIP1_ENST00000371039	SGIP1_ENST00000371039	0.114286	0.84	0.0457143
SHANK3_ENST00000445220					SHANK3_ENST00000445220	0.588235	0.1	0.1
SHQ1	SHQ1	0.0985915	0.809859	0.0915493
SIN3A	SIN3A	0.188623	0.673653	0.137725	SIN3A	0.28	0.730159	0.730159	SIN3A	0.232472	2.06422	0.159722
SIX6					SIX6	0.59375	0.105263	0.105263	SIX6	0.558824	1.52381	0.0392157
SKOR2	SKOR2	0.359223	0.582524	0.0582524	SKOR2	0.616667	0.162162	0.162162	SKOR2	0.560606	1.39535	0.0618557
SLC12A7	SLC12A7	0.370107	0.597865	0.0320285	SLC12A7	0.619048	0.0865385	0.0865385	SLC12A7	0.587571	1.48673	0.0330882
SLC13A3_ENST00000372121	SLC13A3_ENST00000372121	0.396396	0.504505	0.0990991	SLC13A3_ENST00000372121	0.785714	0.25	0.25	SLC13A3_ENST00000372121	0.656716	1.01818	0.11
SLC14A1_ENST00000436407	SLC14A1_ENST00000436407	0.142857	0.827068	0.0300752
SLC16A12_ENST00000371790	SLC16A12_ENST00000371790	0.369369	0.576577	0.0540541	SLC16A12_ENST00000371790	0.640625	0.146341	0.146341	SLC16A12_ENST00000371790	0.585714	1.3617	0.0571429
SLC16A3	SLC16A3	0.441176	0.5	0.0588235	SLC16A3	0.882353	0.133333	0.133333	SLC16A3	0.789474	1	0.0625
SLC18A3	SLC18A3	0.416988	0.567568	0.015444	SLC18A3	0.734694	0.037037	0.037037	SLC18A3	0.715232	1.3125	0.0156863
SLC1A7	SLC1A7	0.388889	0.6	0.0111111	SLC1A7	0.648148	0.0285714	0.0285714	SLC1A7	0.636364	1.5	0.011236
SLC20A2	SLC20A2	0.370787	0.595506	0.0337079	SLC20A2	0.622642	0.0909091	0.0909091	SLC20A2	0.589286	1.47222	0.0348837
SLC22A11	SLC22A11	0.374332	0.59893	0.026738	SLC22A11	0.625	0.0714286	0.0714286	SLC22A11	0.598291	1.49333	0.0274725
SLC22A14									SLC22A14	0.557692	1.6129	0.0253165
SLC24A3					SLC24A3	0.592357	0.0430108	0.0430108	SLC24A3	0.57764	1.61856	0.016
SLC25A6	SLC25A6	0.409836	0.54918	0.0409836	SLC25A6	0.746269	0.1	0.1	SLC25A6	0.694444	1.21818	0.042735
SLC26A6	SLC26A6	0.37013	0.61039	0.0194805	SLC26A6	0.606383	0.0526316	0.0526316	SLC26A6	0.587629	1.56667	0.0198675
SLC26A6_ENST00000383733	SLC26A6_ENST00000383733	0.390411	0.582192	0.0273973	SLC26A6_ENST00000383733	0.670588	0.0701754	0.0701754	SLC26A6_ENST00000383733	0.640449	1.39344	0.028169
SLC28A1_ENST00000537624	SLC28A1_ENST00000537624	0.361446	0.584337	0.0542169	SLC28A1_ENST00000537624	0.618557	0.15	0.15	SLC28A1_ENST00000537624	0.566038	1.4058	0.0573248
SLC2A1	SLC2A1	0.397059	0.588235	0.0147059	SLC2A1	0.675	0.037037	0.037037	SLC2A1	0.658537	1.42857	0.0149254
SLC2A8	SLC2A8	0.398148	0.583333	0.0185185	SLC2A8	0.68254	0.0465116	0.0465116	SLC2A8	0.661538	1.4	0.0188679
SLC34A2	SLC34A2	0.368231	0.602888	0.0288809	SLC34A2	0.610778	0.0784314	0.0784314	SLC34A2	0.582857	1.51818	0.0297398
SLC35F1	SLC35F1	0.261146	0.617834	0.121019	SLC35F1	0.42268	0.463415	0.463415
SLC35F3					SLC35F3	0.609023	0.0864198	0.0864198	SLC35F3	0.578571	1.51136	0.0327103
SLC39A4_ENST00000276833					SLC39A4_ENST00000276833	0.592593	0.104167	0.104167	SLC39A4_ENST00000276833	0.55814	1.5283	0.0387597
SLC41A1	SLC41A1	0.367188	0.585938	0.046875	SLC41A1	0.626667	0.12766	0.12766	SLC41A1	0.580247	1.41509	0.0491803
SLC45A1	SLC45A1	0.391705	0.585253	0.0230415	SLC45A1	0.669291	0.0588235	0.0588235	SLC45A1	0.643939	1.41111	0.0235849
SLC45A1_ENST00000377479	SLC45A1_ENST00000377479	0.38191	0.59799	0.0201005	SLC45A1_ENST00000377479	0.638655	0.0526316	0.0526316	SLC45A1_ENST00000377479	0.617886	1.4875	0.0205128
SLC45A4	SLC45A4	0.393836	0.59589	0.010274	SLC45A4	0.66092	0.026087	0.026087	SLC45A4	0.649718	1.47458	0.0103806
SLC45A4_ENST00000517878									SLC45A4_ENST00000517878	0.575949	1.67742	0.00809717
SLC46A2	SLC46A2	0.373832	0.598131	0.0280374	SLC46A2	0.625	0.075	0.075	SLC46A2	0.597015	1.48837	0.0288462
SLC47A1	SLC47A1	0.390977	0.548872	0.0601504	SLC47A1	0.712329	0.153846	0.153846	SLC47A1	0.641975	1.21667	0.064
SLC5A2	SLC5A2	0.375661	0.582011	0.042328	SLC5A2	0.645455	0.112676	0.112676	SLC5A2	0.601695	1.39241	0.0441989
SLC6A18	SLC6A18	0.385965	0.605263	0.00877193	SLC6A18	0.637681	0.0227273	0.0227273	SLC6A18	0.628571	1.53333	0.00884956
SLC6A20	SLC6A20	0.404762	0.559524	0.0357143	SLC6A20	0.723404	0.0882353	0.0882353	SLC6A20	0.68	1.27027	0.037037
SLC6A20_ENST00000358525	SLC6A20_ENST00000358525	0.394444	0.572222	0.0333333	SLC6A20_ENST00000358525	0.68932	0.084507	0.084507	SLC6A20_ENST00000358525	0.651376	1.33766	0.0344828
SLC7A10	SLC7A10	0.389706	0.602941	0.00735294	SLC7A10	0.646341	0.0188679	0.0188679	SLC7A10	0.638554	1.51852	0.00740741
SLC8A3					SLC8A3	0.59761	0.106667	0.106667	SLC8A3	0.561798	1.51205	0.0399002
SLC9A3	SLC9A3	0.38785	0.588785	0.0233645	SLC9A3	0.65873	0.060241	0.060241	SLC9A3	0.633588	1.43182	0.0239234
SLCO4A1	SLCO4A1	0.393204	0.597087	0.00970874	SLCO4A1	0.658537	0.0246914	0.0246914	SLCO4A1	0.648	1.48193	0.00980392
SLITRK1					SLITRK1	0.606811	0.0969388	0.0969388	SLITRK1	0.573099	1.50233	0.0366089
SMAD2	SMAD2	0.05625	0.66875	0.275	SMAD2	0.0841121	4.88889	4.88889	SMAD2	0.0596026	2.01887	0.37931
SMAD2_ENST00000591214	SMAD2_ENST00000591214	0.0751174	0.732394	0.192488	SMAD2_ENST00000591214	0.102564	2.5625	2.5625	SMAD2_ENST00000591214	0.0812183	2.73684	0.238372
SMAD3	SMAD3	0.107937	0.796825	0.0952381
SMAD4	SMAD4	0.0246599	0.761905	0.213435	SMAD4	0.0323661	8.65517	8.65517	SMAD4	0.0252833	3.2	0.271351
SMAD4_ENST00000452201	SMAD4_ENST00000452201	0.0629371	0.706294	0.230769	SMAD4_ENST00000452201	0.0891089	3.66667	3.66667	SMAD4_ENST00000452201	0.0671642	2.40476	0.3
SMARCA4	SMARCA4	0.113576	0.792369	0.094055
SMARCA4_ENST00000358026	SMARCA4_ENST00000358026	0.116367	0.801325	0.0823084
SMARCB1	SMARCB1	0.103943	0.691756	0.204301	SMARCB1	0.150259	1.96552	1.96552	SMARCB1	0.116	2.24419	0.256757
SMARCD1	SMARCD1	0.125	0.742188	0.132812					SMARCD1	0.142857	2.87879	0.153153
SMARCD2	SMARCD2	0.173913	0.626087	0.2	SMARCD2	0.277778	1.15	1.15	SMARCD2	0.210526	1.67442	0.25
SMARCD2_ENST00000323347	SMARCD2_ENST00000323347	0.2	0.6	0.2	SMARCD2_ENST00000323347	0.333333	1	1	SMARCD2_ENST00000323347	0.25	1.5	0.25
SMC1A	SMC1A	0.125	0.83871	0.0362903
SMC5	SMC5	0.111628	0.748837	0.139535	SMC5	0.149068	1.25	1.25	SMC5	0.125654	2.98148	0.162162
SMO	SMO	0.112426	0.857988	0.0295858
SNX8	SNX8	0.396825	0.571429	0.031746	SNX8	0.694444	0.08	0.08	SNX8	0.657895	1.33333	0.0327869
SOX1	SOX1	0.456897	0.543103	0	SOX1	0.84127	0	0	SOX1	0.84127	1.18868	0
SOX2	SOX2	0.147887	0.823944	0.028169
SOX9	SOX9	0.106667	0.636667	0.256667	SOX9	0.167539	2.40625	2.40625	SOX9	0.119403	1.75229	0.345291
SP3_ENST00000310015	SP3_ENST00000310015	0.386047	0.553488	0.0604651	SP3_ENST00000310015	0.697479	0.156627	0.156627	SP3_ENST00000310015	0.628788	1.23958	0.0643564
SPATA17	SPATA17	0.224638	0.630435	0.144928	SPATA17	0.356322	0.645161	0.645161	SPATA17	0.28972	1.70588	0.169492
SPATA20	SPATA20	0.364078	0.597087	0.038835	SPATA20	0.609756	0.106667	0.106667	SPATA20	0.572519	1.48193	0.040404
SPNS3	SPNS3	0.356061	0.590909	0.0530303	SPNS3	0.602564	0.148936	0.148936
SPOP	SPOP	0.0283688	0.940898	0.0307329	SPOP	0.0301508	1.08333	1.08333	SPOP	0.0291971	15.92	0.0317073
SPRED1	SPRED1	0.169811	0.641509	0.188679	SPRED1	0.264706	1.11111	1.11111	SPRED1	0.204545	1.78947	0.232558
SPTY2D1	SPTY2D1	0.192547	0.689441	0.118012
SRSF2	SRSF2	0.0620438	0.923358	0.0145985	SRSF2	0.0671937	0.235294	0.235294	SRSF2	0.0661479	12.0476	0.0148148
SS18L1_ENST00000331758	SS18L1_ENST00000331758	0.366972	0.577982	0.0550459	SS18L1_ENST00000331758	0.634921	0.15	0.15	SS18L1_ENST00000331758	0.57971	1.36957	0.0582524
SSTR5	SSTR5	0.390476	0.6	0.00952381	SSTR5	0.650794	0.0243902	0.0243902	SSTR5	0.640625	1.5	0.00961538
SSX2IP_ENST00000370612	SSX2IP_ENST00000370612	0.119266	0.816514	0.0642202
SSX5	SSX5	0.131034	0.868966	0
ST3GAL1	ST3GAL1	0.367925	0.632075	0					ST3GAL1	0.58209	1.71795	0
ST8SIA5									ST8SIA5	0.56383	1.72222	0.00684932
STAG2	STAG2	0.0940299	0.655224	0.250746	STAG2	0.143508	2.66667	2.66667	STAG2	0.103789	1.90043	0.334661
STAG2_ENST00000218089	STAG2_ENST00000218089	0.0913462	0.674679	0.233974	STAG2_ENST00000218089	0.135392	2.5614	2.5614	STAG2_ENST00000218089	0.100529	2.07389	0.305439
STAM2	STAM2	0.12963	0.824074	0.0462963
STAT2	STAT2	0.307692	0.576923	0.115385	STAT2	0.533333	0.375	0.375
STAT5B	STAT5B	0.112903	0.842742	0.0443548
STC2	STC2	0.367742	0.574194	0.0580645	STC2	0.640449	0.157895	0.157895	STC2	0.581633	1.34848	0.0616438
STEAP3_ENST00000393110									STEAP3_ENST00000393110	0.560976	1.61224	0.024
STEAP3_ENST00000409811	STEAP3_ENST00000409811	0.415094	0.556604	0.0283019	STEAP3_ENST00000409811	0.745763	0.0681818	0.0681818	STEAP3_ENST00000409811	0.709677	1.25532	0.0291262
STIP1	STIP1	0.165217	0.721739	0.113043
STK11	STK11	0.064877	0.635347	0.299776	STK11	0.102113	4.62069	4.62069	STK11	0.069378	1.74233	0.428115
STK11_ENST00000326873	STK11_ENST00000326873	0.0473373	0.64497	0.307692	STK11_ENST00000326873	0.0733945	6.5	6.5	STK11_ENST00000326873	0.0496894	1.81667	0.444444
SUFU	SUFU	0.1375	0.825	0.0375
SUPT16H	SUPT16H	0.139423	0.822115	0.0384615
SUSD5	SUSD5	0.314103	0.583333	0.102564
SUZ12	SUZ12	0.0753769	0.824121	0.100503	SUZ12	0.0914634	1.33333	1.33333	SUZ12	0.0815217	4.68571	0.111732
SYN1_ENST00000295987	SYN1_ENST00000295987	0.37037	0.607407	0.0222222	SYN1_ENST00000295987	0.609756	0.06	0.06	SYN1_ENST00000295987	0.588235	1.54717	0.0227273
SYT7	SYT7	0.386076	0.588608	0.0253165	SYT7	0.655914	0.0655738	0.0655738	SYT7	0.628866	1.43077	0.025974
TACR1	TACR1	0.358779	0.572519	0.0687023	TACR1	0.626667	0.191489	0.191489	TACR1	0.559524	1.33929	0.0737705
TAF1	TAF1	0.121622	0.849099	0.0292793
TAF1_ENST00000276072	TAF1_ENST00000276072	0.127711	0.845783	0.026506
TAF1_ENST00000449580	TAF1_ENST00000449580	0.137838	0.832432	0.0297297
TAOK1_ENST00000261716	TAOK1_ENST00000261716	0.152709	0.73399	0.1133
TAP2_ENST00000374897	TAP2_ENST00000374897	0.22807	0.640351	0.131579	TAP2_ENST00000374897	0.356164	0.576923	0.576923	TAP2_ENST00000374897	0.295455	1.78049	0.151515
TARS	TARS	0.131429	0.748571	0.12
TAS2R1	TAS2R1	0.361111	0.597222	0.0416667	TAS2R1	0.604651	0.115385	0.115385	TAS2R1	0.565217	1.48276	0.0434783
TAS2R38									TAS2R38	0.557895	1.64286	0.0206897
TAS2R41	TAS2R41	0.328125	0.585938	0.0859375
TAS2R60	TAS2R60	0.344156	0.590909	0.0649351
TBC1D24	TBC1D24	0.398649	0.560811	0.0405405	TBC1D24	0.710843	0.101695	0.101695	TBC1D24	0.662921	1.27692	0.0422535
TBL1XR1	TBL1XR1	0.0933333	0.871111	0.0355556	TBL1XR1	0.107143	0.380952	0.380952	TBL1XR1	0.102941	6.75862	0.0368664
TBP	TBP	0.573913	0.417391	0.00869565	TBP	1.375	0.0151515	0.0151515	TBP	1.34694	0.716418	0.00877193
TBR1	TBR1	0.396135	0.57971	0.0241546	TBR1	0.683333	0.0609756	0.0609756	TBR1	0.656	1.37931	0.0247525
TBX10	TBX10	0.384615	0.576923	0.0384615	TBX10	0.666667	0.1	0.1	TBX10	0.625	1.36364	0.04
TBX19	TBX19	0.371212	0.537879	0.0909091	TBX19	0.690141	0.244898	0.244898	TBX19	0.590361	1.16393	0.1
TBX3	TBX3	0.116883	0.820346	0.0627706
TBXA2R	TBXA2R	0.394161	0.569343	0.0364964	TBXA2R	0.692308	0.0925926	0.0925926	TBXA2R	0.650602	1.32203	0.0378788
TBXA2R_ENST00000411851					TBXA2R_ENST00000411851	0.604396	0.109091	0.109091	TBXA2R_ENST00000411851	0.56701	1.4918	0.0410959
TCEA3	TCEA3	0.156863	0.72549	0.117647
TCEB3C	TCEB3C	0.230769	0.644231	0.125	TCEB3C	0.358209	0.541667	0.541667
TCF12	TCF12	0.0779221	0.831169	0.0909091	TCF12	0.09375	1.16667	1.16667	TCF12	0.084507	4.92308	0.1
TCF12_ENST00000438423	TCF12_ENST00000438423	0.0791367	0.834532	0.0863309	TCF12_ENST00000438423	0.0948276	1.09091	1.09091	TCF12_ENST00000438423	0.0859375	5.04348	0.0944882
TCF12_ENST00000452095	TCF12_ENST00000452095	0.0785714	0.842857	0.0785714	TCF12_ENST00000452095	0.0932203	1	1	TCF12_ENST00000452095	0.0852713	5.36364	0.0852713
TCF25_ENST00000263347	TCF25_ENST00000263347	0.302752	0.577982	0.119266	TCF25_ENST00000263347	0.52381	0.393939	0.393939
TCF7L2	TCF7L2	0.15727	0.694362	0.148368	TCF7L2	0.226496	0.943396	0.943396	TCF7L2	0.18662	2.27184	0.174216
TCF7L2_ENST00000352065	TCF7L2_ENST00000352065	0.097561	0.721951	0.180488	TCF7L2_ENST00000352065	0.135135	1.85	1.85	TCF7L2_ENST00000352065	0.108108	2.59649	0.220238
TCF7L2_ENST00000355717	TCF7L2_ENST00000355717	0.157191	0.662207	0.180602	TCF7L2_ENST00000355717	0.237374	1.14894	1.14894	TCF7L2_ENST00000355717	0.186508	1.9604	0.220408
TCF7L2_ENST00000543371	TCF7L2_ENST00000543371	0.137363	0.714286	0.148352	TCF7L2_ENST00000543371	0.192308	1.08	1.08	TCF7L2_ENST00000543371	0.159236	2.5	0.174194
TCHP	TCHP	0.116505	0.786408	0.0970874
TET2	TET2	0.0507881	0.632224	0.316988	TET2	0.0803324	6.24138	6.24138	TET2	0.0535055	1.71905	0.464103
TET2_ENST00000305737	TET2_ENST00000305737	0.0787234	0.617021	0.304255	TET2_ENST00000305737	0.127586	3.86486	3.86486	TET2_ENST00000305737	0.0854503	1.61111	0.437309
TFAP2D					TFAP2D	0.594286	0.0865385	0.0865385	TFAP2D	0.565217	1.54867	0.0322581
TGFBR1	TGFBR1	0.062069	0.796552	0.141379	TGFBR1	0.0779221	2.27778	2.27778	TGFBR1	0.0661765	3.91525	0.164659
TGFBR2	TGFBR2	0.0665138	0.809633	0.123853	TGFBR2	0.082153	1.86207	1.86207	TGFBR2	0.0712531	4.25301	0.141361
TGFBR2_ENST00000359013	TGFBR2_ENST00000359013	0.0629723	0.828715	0.108312	TGFBR2_ENST00000359013	0.0759878	1.72	1.72	TGFBR2_ENST00000359013	0.0672043	4.83824	0.121469
TGIF2LX	TGIF2LX	0.357724	0.585366	0.0569106	TGIF2LX	0.611111	0.159091	0.159091	TGIF2LX	0.556962	1.41176	0.0603448
THBD	THBD	0.392857	0.592857	0.0142857	THBD	0.662651	0.0363636	0.0363636	THBD	0.647059	1.45614	0.0144928
TJAP1	TJAP1	0.169643	0.821429	0.00892857
TJAP1_ENST00000372445	TJAP1_ENST00000372445	0.168317	0.821782	0.00990099
TMEM130	TMEM130	0.4	0.571429	0.0285714	TMEM130	0.7	0.0714286	0.0714286	TMEM130	0.666667	1.33333	0.0294118
TMEM161B	TMEM161B	0.152542	0.822034	0.0254237
TMEM214					TMEM214	0.592105	0.0888889	0.0888889	TMEM214	0.5625	1.55102	0.0330579
TMEM232_ENST00000455884	TMEM232_ENST00000455884	0.159292	0.707965	0.132743	TMEM232_ENST00000455884	0.225	0.833333	0.833333	TMEM232_ENST00000455884	0.189474	2.42424	0.153061
TMEM79	TMEM79	0.412281	0.561404	0.0263158	TMEM79	0.734375	0.0638298	0.0638298	TMEM79	0.701493	1.28	0.027027
TMTC3	TMTC3	0.116129	0.845161	0.0387097
TNFRSF11B	TNFRSF11B	0.24031	0.643411	0.116279	TNFRSF11B	0.373494	0.483871	0.483871
TNFRSF11B_ENST00000297350	TNFRSF11B_ENST00000297350	0.24	0.648	0.112
TNFRSF14_ENST00000355716	TNFRSF14_ENST00000355716	0.106796	0.776699	0.116505
TNFSF11	TNFSF11	0.21	0.67	0.12
TNK1					TNK1	0.587302	0.027027	0.027027	TNK1	0.578125	1.65789	0.01
TNRC6B	TNRC6B	0.278997	0.605016	0.115987	TNRC6B	0.46114	0.41573	0.41573
TNRC6B_ENST00000301923	TNRC6B_ENST00000301923	0.262931	0.599138	0.137931	TNRC6B_ENST00000301923	0.438849	0.52459	0.52459	TNRC6B_ENST00000301923	0.356725	1.49462	0.16
TNRC6B_ENST00000454349	TNRC6B_ENST00000454349	0.280591	0.578059	0.14135	TNRC6B_ENST00000454349	0.485401	0.503759	0.503759	TNRC6B_ENST00000454349	0.390029	1.37	0.164619
TP53	TP53	0.0110118	0.820061	0.168928	TP53	0.013428	15.3406	15.3406	TP53	0.0111344	4.55743	0.203265
TP53_ENST00000269305	TP53_ENST00000269305	0.0106335	0.81805	0.171317	TP53_ENST00000269305	0.0129986	16.1111	16.1111	TP53_ENST00000269305	0.0107477	4.496	0.206734
TP53_ENST00000413465	TP53_ENST00000413465	0.0108537	0.83415	0.154997	TP53_ENST00000413465	0.0130117	14.2805	14.2805	TP53_ENST00000413465	0.0109728	5.02953	0.183427
TP53_ENST00000414315	TP53_ENST00000414315	0.00459301	0.784129	0.211278	TP53_ENST00000414315	0.00585747	46	46	TP53_ENST00000414315	0.0046142	3.63239	0.267874
TP53_ENST00000420246	TP53_ENST00000420246	0.0126841	0.837152	0.150164	TP53_ENST00000420246	0.0151515	11.8387	11.8387	TP53_ENST00000420246	0.0128471	5.1407	0.176697
TP53_ENST00000455263	TP53_ENST00000455263	0.011532	0.839547	0.148921	TP53_ENST00000455263	0.0137359	12.9138	12.9138	TP53_ENST00000455263	0.0116665	5.23234	0.17498
TP53_ENST00000545858	TP53_ENST00000545858	0.00472633	0.857448	0.137826	TP53_ENST00000545858	0.00551209	29.1613	29.1613	TP53_ENST00000545858	0.00474877	6.01497	0.159859
TP73	TP73	0.333333	0.590643	0.0760234
TP73_ENST00000378288	TP73_ENST00000378288	0.348684	0.572368	0.0789474	TP73_ENST00000378288	0.609195	0.226415	0.226415
TRAF7	TRAF7	0.107843	0.866013	0.0261438
TRAFD1	TRAFD1	0.12	0.85	0.03
TRDN	TRDN	0.0884956	0.823009	0.0884956	TRDN	0.107527	1	1	TRDN	0.0970874	4.65	0.0970874
TREML2	TREML2	0.367647	0.602941	0.0294118	TREML2	0.609756	0.08	0.08	TREML2	0.581395	1.51852	0.030303
TRIB2	TRIB2	0.386139	0.60396	0.00990099	TRIB2	0.639344	0.025641	0.025641	TRIB2	0.629032	1.525	0.01
TRIM22	TRIM22	0.230769	0.623932	0.145299	TRIM22	0.369863	0.62963	0.62963	TRIM22	0.3	1.65909	0.17
TRIM23	TRIM23	0.12844	0.834862	0.0366972
TRIM37	TRIM37	0.175258	0.701031	0.123711
TRIM48	TRIM48	0.157895	0.837719	0.00438596
TRIM48_ENST00000417545	TRIM48_ENST00000417545	0.155844	0.835498	0.00865801
TRIM50	TRIM50	0.414062	0.554688	0.03125	TRIM50	0.746479	0.0754717	0.0754717	TRIM50	0.706667	1.24561	0.0322581
TRIM50_ENST00000333149	TRIM50_ENST00000333149	0.412698	0.555556	0.031746	TRIM50_ENST00000333149	0.742857	0.0769231	0.0769231	TRIM50_ENST00000333149	0.702703	1.25	0.0327869
TRIO_ENST00000344135					TRIO_ENST00000344135	0.597561	0.102041	0.102041	TRIO_ENST00000344135	0.563218	1.51852	0.0381679
TROAP	TROAP	0.115789	0.857895	0.0263158
TRPV1_ENST00000174621	TRPV1_ENST00000174621	0.375	0.58125	0.04375	TRPV1_ENST00000174621	0.645161	0.116667	0.116667	TRPV1_ENST00000174621	0.6	1.38806	0.0457516
TRPV1_ENST00000399756	TRPV1_ENST00000399756	0.353659	0.597561	0.0487805	TRPV1_ENST00000399756	0.591837	0.137931	0.137931
TRPV4	TRPV4	0.389121	0.585774	0.0251046	TRPV4	0.664286	0.0645161	0.0645161	TRPV4	0.636986	1.41414	0.0257511
TSC1	TSC1	0.158	0.672	0.17	TSC1	0.235119	1.07595	1.07595	TSC1	0.187648	2.04878	0.204819
TSC1_ENST00000403810	TSC1_ENST00000403810	0.0985915	0.697183	0.204225	TSC1_ENST00000403810	0.141414	2.07143	2.07143	TSC1_ENST00000403810	0.109375	2.30233	0.256637
TSC22D2					TSC22D2	0.597561	0.102041	0.102041	TSC22D2	0.563218	1.51852	0.0381679
TSGA10	TSGA10	0.177665	0.695431	0.126904	TSGA10	0.255474	0.714286	0.714286
TSHR	TSHR	0.124197	0.850107	0.0256959
TSSK6	TSSK6	0.411765	0.54902	0.0392157	TSSK6	0.75	0.0952381	0.0952381	TSSK6	0.7	1.21739	0.0408163
TTLL8_ENST00000440475									TTLL8_ENST00000440475	0.565217	1.63415	0.0188679
TUBB4	TUBB4	0.378855	0.585903	0.0352423	TUBB4	0.646617	0.0930233	0.0930233	TUBB4	0.609929	1.41489	0.0365297
TUBD1	TUBD1	0.117647	0.794118	0.0882353
TXLNA	TXLNA	0.118182	0.872727	0.00909091
TXNRD1_ENST00000525566	TXNRD1_ENST00000525566	0.12844	0.825688	0.0458716
U2AF1	U2AF1	0.0534125	0.931751	0.0148368	U2AF1	0.0573248	0.277778	0.277778	U2AF1	0.0564263	13.6522	0.0150602
U2AF1_ENST00000380276	U2AF1_ENST00000380276	0.0685921	0.913357	0.0180505	U2AF1_ENST00000380276	0.0750988	0.263158	0.263158	U2AF1_ENST00000380276	0.0736434	10.5417	0.0183824
U2AF2	U2AF2	0.151515	0.840909	0.00757576
U2SURP	U2SURP	0.119171	0.84456	0.0362694
UBC	UBC	0.509434	0.462264	0.0283019	UBC	1.10204	0.0555556	0.0555556	UBC	1.03846	0.859649	0.0291262
UGT2B17	UGT2B17	0.206349	0.674603	0.119048
UPF3A	UPF3A	0.382609	0.582609	0.0347826	UPF3A	0.656716	0.0909091	0.0909091	UPF3A	0.619718	1.39583	0.036036
UPF3B	UPF3B	0.0916667	0.766667	0.141667	UPF3B	0.119565	1.54545	1.54545	UPF3B	0.100917	3.28571	0.165049
USO1_ENST00000538159	USO1_ENST00000538159	0.117188	0.8125	0.0703125
USP28	USP28	0.143836	0.712329	0.143836	USP28	0.201923	1	1	USP28	0.168	2.47619	0.168
USP43	USP43	0.185185	0.666667	0.148148	USP43	0.277778	0.8	0.8	USP43	0.227273	2	0.173913
USP45	USP45	0.138686	0.678832	0.182482	USP45	0.204301	1.31579	1.31579	USP45	0.161017	2.11364	0.223214
USP7	USP7	0.188679	0.694969	0.116352
USP8	USP8	0.121849	0.831933	0.0462185
USP9X	USP9X	0.168443	0.710021	0.121535
USP9X_ENST00000324545	USP9X_ENST00000324545	0.163717	0.714602	0.121681
VHL	VHL	0.0462606	0.736315	0.217425	VHL	0.0628272	4.7	4.7	VHL	0.0485044	2.7924	0.277833
VIPAR	VIPAR	0.316239	0.581197	0.102564
VIPR1	VIPR1	0.37037	0.601852	0.0277778	VIPR1	0.615385	0.075	0.075	VIPR1	0.588235	1.51163	0.0285714
VPS53	VPS53	0.19685	0.685039	0.11811
VSIG1					VSIG1	0.585714	0.0731707	0.0731707	VSIG1	0.561644	1.59091	0.027027
VSIG1_ENST00000415430	VSIG1_ENST00000415430	0.373913	0.6	0.026087	VSIG1_ENST00000415430	0.623188	0.0697674	0.0697674	VSIG1_ENST00000415430	0.597222	1.5	0.0267857
VSIG1_ENST00000444426					VSIG1_ENST00000444426	0.589041	0.0697674	0.0697674	VSIG1_ENST00000444426	0.565789	1.58696	0.0258621
VWC2L	VWC2L	0.140496	0.826446	0.0330579
WAC	WAC	0.301775	0.585799	0.112426	WAC	0.515152	0.372549	0.372549
WDR1_ENST00000499869									WDR1_ENST00000499869	0.556962	1.73333	0.00819672
WDR18					WDR18	0.591549	0.0714286	0.0714286	WDR18	0.567568	1.57778	0.0265487
WDR20	WDR20	0.336066	0.590164	0.0737705
WDR20_ENST00000454394	WDR20_ENST00000454394	0.357798	0.577982	0.0642202	WDR20_ENST00000454394	0.619048	0.179487	0.179487	WDR20_ENST00000454394	0.557143	1.36957	0.0686275
WNT5B_ENST00000397196	WNT5B_ENST00000397196	0.369369	0.576577	0.0540541	WNT5B_ENST00000397196	0.640625	0.146341	0.146341	WNT5B_ENST00000397196	0.585714	1.3617	0.0571429
WNT9B					WNT9B	0.584615	0.131579	0.131579
WT1	WT1	0.102689	0.677262	0.220049	WT1	0.151625	2.14286	2.14286	WT1	0.114441	2.09848	0.282132
WT1_ENST00000332351	WT1_ENST00000332351	0.103152	0.719198	0.17765	WT1_ENST00000332351	0.143426	1.72222	1.72222	WT1_ENST00000332351	0.115016	2.56122	0.216028
WT1_ENST00000379079	WT1_ENST00000379079	0.100372	0.70632	0.193309	WT1_ENST00000379079	0.142105	1.92593	1.92593	WT1_ENST00000379079	0.11157	2.40506	0.239631
XPO1	XPO1	0.121387	0.84104	0.0375723
XRCC6	XRCC6	0.151261	0.823529	0.0252101
XRN1	XRN1	0.114754	0.809836	0.0754098
YAP1	YAP1	0.0887097	0.862903	0.0483871	YAP1	0.102804	0.545455	0.545455	YAP1	0.0973451	6.29412	0.0508475
YAP1_ENST00000282441	YAP1_ENST00000282441	0.0915033	0.869281	0.0392157	YAP1_ENST00000282441	0.105263	0.428571	0.428571	YAP1_ENST00000282441	0.100719	6.65	0.0408163
YES1	YES1	0.0971429	0.822857	0.08	YES1	0.118056	0.823529	0.823529
YLPM1	YLPM1	0.188095	0.664286	0.147619	YLPM1	0.283154	0.78481	0.78481	YLPM1	0.231672	1.97872	0.173184
YLPM1_ENST00000325680	YLPM1_ENST00000325680	0.192149	0.665289	0.142562	YLPM1_ENST00000325680	0.28882	0.741935	0.741935	YLPM1_ENST00000325680	0.237852	1.98765	0.166265
YTHDF3	YTHDF3	0.585034	0.387755	0.0272109	YTHDF3	1.50877	0.0465116	0.0465116	YTHDF3	1.40984	0.633333	0.027972
ZAN_ENST00000546213					ZAN_ENST00000546213	0.60355	0.0686275	0.0686275	ZAN_ENST00000546213	0.579545	1.55046	0.0258303
ZBTB26	ZBTB26	0.514706	0.477941	0.00735294	ZBTB26	1.07692	0.0142857	0.0142857	ZBTB26	1.06061	0.915493	0.00740741
ZC3H13	ZC3H13	0.142191	0.724942	0.132867	ZC3H13	0.196141	0.934426	0.934426	ZC3H13	0.165761	2.63559	0.153226
ZC3H13_ENST00000242848	ZC3H13_ENST00000242848	0.141844	0.718676	0.13948	ZC3H13_ENST00000242848	0.197368	0.983333	0.983333	ZC3H13_ENST00000242848	0.165289	2.55462	0.162088
ZFP2	ZFP2	0.120805	0.825503	0.0536913
ZFP36L2	ZFP36L2	0.115789	0.815789	0.0684211
ZFP37_ENST00000553380	ZFP37_ENST00000553380	0.138158	0.828947	0.0328947
ZMYND10	ZMYND10	0.307692	0.596154	0.0961538
ZNF135	ZNF135	0.388889	0.532407	0.0787037	ZNF135	0.730435	0.202381	0.202381	ZNF135	0.636364	1.13861	0.0854271
ZNF135_ENST00000401053	ZNF135_ENST00000401053	0.384259	0.537037	0.0787037	ZNF135_ENST00000401053	0.715517	0.204819	0.204819	ZNF135_ENST00000401053	0.62406	1.16	0.0854271
ZNF136	ZNF136	0.132231	0.743802	0.123967
ZNF14	ZNF14	0.151163	0.674419	0.174419	ZNF14	0.224138	1.15385	1.15385	ZNF14	0.178082	2.07143	0.211268
ZNF215	ZNF215	0.16129	0.725806	0.112903
ZNF224	ZNF224	0.356164	0.59589	0.0479452	ZNF224	0.597701	0.134615	0.134615
ZNF23	ZNF23	0.232143	0.651786	0.116071
ZNF238	ZNF238	0.340136	0.564626	0.0952381	ZNF238	0.60241	0.28	0.28
ZNF238_ENST00000358704	ZNF238_ENST00000358704	0.35	0.557143	0.0928571	ZNF238_ENST00000358704	0.628205	0.265306	0.265306
ZNF276	ZNF276	0.22695	0.539007	0.234043	ZNF276	0.421053	1.03125	1.03125	ZNF276	0.293578	1.16923	0.305556
ZNF276_ENST00000443381	ZNF276_ENST00000443381	0.209459	0.567568	0.222973	ZNF276_ENST00000443381	0.369048	1.06452	1.06452	ZNF276_ENST00000443381	0.264957	1.3125	0.286957
ZNF292	ZNF292	0.15914	0.707527	0.133333	ZNF292	0.224924	0.837838	0.837838	ZNF292	0.189258	2.41912	0.153846
ZNF292_ENST00000369577	ZNF292_ENST00000369577	0.163223	0.698347	0.13843	ZNF292_ENST00000369577	0.233728	0.848101	0.848101	ZNF292_ENST00000369577	0.195062	2.31507	0.160671
ZNF319	ZNF319	0.43662	0.542254	0.0211268	ZNF319	0.805195	0.0483871	0.0483871	ZNF319	0.775	1.18462	0.0215827
ZNF323	ZNF323	0.184466	0.679612	0.135922	ZNF323	0.271429	0.736842	0.736842	ZNF323	0.22619	2.12121	0.157303
ZNF354B	ZNF354B	0.12844	0.834862	0.0366972
ZNF384_ENST00000361959	ZNF384_ENST00000361959	0.494253	0.477011	0.0287356	ZNF384_ENST00000361959	1.03614	0.0581395	0.0581395	ZNF384_ENST00000361959	0.977273	0.912088	0.0295858
ZNF418	ZNF418	0.2	0.681818	0.118182
ZNF441	ZNF441	0.178295	0.705426	0.116279
ZNF491	ZNF491	0.15534	0.718447	0.126214
ZNF503	ZNF503	0.398148	0.592593	0.00925926	ZNF503	0.671875	0.0232558	0.0232558	ZNF503	0.661538	1.45455	0.00934579
ZNF517	ZNF517	0.4	0.6	0	ZNF517	0.666667	0	0	ZNF517	0.666667	1.5	0
ZNF548_ENST00000336128	ZNF548_ENST00000336128	0.268293	0.601626	0.130081	ZNF548_ENST00000336128	0.445946	0.484848	0.484848	ZNF548_ENST00000336128	0.366667	1.5102	0.149533
ZNF626_ENST00000392298	ZNF626_ENST00000392298	0.134897	0.821114	0.0439883
ZNF629	ZNF629	0.4	0.572727	0.0272727	ZNF629	0.698413	0.0681818	0.0681818	ZNF629	0.666667	1.34043	0.0280374
ZNF71	ZNF71	0.364407	0.59322	0.0423729	ZNF71	0.614286	0.116279	0.116279	ZNF71	0.573333	1.45833	0.0442478
ZNF711	ZNF711	0.104072	0.841629	0.0542986
ZNF711_ENST00000373165	ZNF711_ENST00000373165	0.117647	0.828054	0.0542986
ZNF730	ZNF730	0.374046	0.618321	0.00763359	ZNF730	0.604938	0.0204082	0.0204082	ZNF730	0.597561	1.62	0.00769231
ZNF750	ZNF750	0.204167	0.595833	0.2	ZNF750	0.342657	0.979592	0.979592	ZNF750	0.256545	1.47423	0.25
ZNF813	ZNF813	0.37013	0.61039	0.0194805	ZNF813	0.606383	0.0526316	0.0526316	ZNF813	0.587629	1.56667	0.0198675
ZNF844	ZNF844	0.106838	0.871795	0.0213675
ZNF853	ZNF853	0.241935	0.637097	0.120968	ZNF853	0.379747	0.5	0.5
ZNF853_ENST00000457543	ZNF853_ENST00000457543	0.241935	0.637097	0.120968	ZNF853_ENST00000457543	0.379747	0.5	0.5
ZNF92	ZNF92	0.438053	0.539823	0.0221239	ZNF92	0.811475	0.0505051	0.0505051	ZNF92	0.779528	1.17308	0.0226244
ZNRF3	ZNRF3	0.209524	0.661905	0.128571	ZNRF3	0.316547	0.613636	0.613636	ZNRF3	0.26506	1.95775	0.147541
ZNRF3_ENST00000544604	ZNRF3_ENST00000544604	0.217822	0.653465	0.128713	ZNRF3_ENST00000544604	0.333333	0.590909	0.590909	ZNRF3_ENST00000544604	0.278481	1.88571	0.147727
ZNRF4	ZNRF4	0.393035	0.58209	0.0248756	ZNRF4	0.675214	0.0632911	0.0632911	ZNRF4	0.647541	1.39286	0.0255102
ZRSR2	ZRSR2	0.107595	0.727848	0.164557	ZRSR2	0.147826	1.52941	1.52941	ZRSR2	0.120567	2.67442	0.19697

## Sheet: CG_SSI lists
Gene symbol (1333)	CG_SSIf_2SD	indel_fS	indel_fM	indel_fN	CG_SSIr2_2SD	indel_rSM	indel_rNM	indel_rNS	CG_SSIr3_2SD	indel_rSMN	indel_rMNS	indel_rNSM
AAAS	AAAS	0.209524	0.647619	0.142857
AASDH	AASDH	0.170984	0.65285	0.176166	AASDH	0.261905	0.269841	1.0303	AASDH	0.20625	1.8806	0.213836
AASDH_ENST00000502617	AASDH_ENST00000502617	0.134615	0.673077	0.192308	AASDH_ENST00000502617	0.2	0.285714	1.42857	AASDH_ENST00000502617	0.155556	2.05882	0.238095
ABCB8_ENST00000356058	ABCB8_ENST00000356058	0.359223	0.582524	0.0582524	ABCB8_ENST00000356058	0.616667	0.1	0.162162	ABCB8_ENST00000356058	0.560606	1.39535	0.0618557
ABCG8	ABCG8	0.374429	0.584475	0.0410959	ABCG8	0.640625	0.0703125	0.109756	ABCG8	0.59854	1.40659	0.0428571
ABLIM1_ENST00000392952	ABLIM1_ENST00000392952	0.13	0.82	0.05
ACBD3	ACBD3	0.214953	0.635514	0.149533
ACCN5	ACCN5	0.16129	0.819355	0.0193548
ACKR3	ACKR3	0.369048	0.619048	0.0119048	ACKR3	0.596154	0.0192308	0.0322581	ACKR3	0.584906	1.625	0.0120482
ACRBP	ACRBP	0.335938	0.578125	0.0859375
ACTA1	ACTA1	0.368421	0.611842	0.0197368	ACTA1	0.602151	0.0322581	0.0535714	ACTA1	0.583333	1.57627	0.0201342
ACTL6B	ACTL6B	0.299213	0.582677	0.11811
ACTL9									ACTL9	0.568627	1.63736	0.0169492
ACVR1B	ACVR1B	0.111702	0.776596	0.111702
ACVR1B_ENST00000541224	ACVR1B_ENST00000541224	0.102564	0.726496	0.17094					ACVR1B_ENST00000541224	0.114286	2.65625	0.206186
ACVR2A	ACVR2A	0.0663717	0.360619	0.573009	ACVR2A	0.184049	1.58896	8.63333	ACVR2A	0.07109	0.564014	1.34197
ADD1_ENST00000398125					ADD1_ENST00000398125	0.589041	0.0821918	0.139535
ADD3	ADD3	0.195652	0.641304	0.163043	ADD3	0.305085	0.254237	0.833333
ADNP	ADNP	0.171548	0.665272	0.16318	ADNP	0.257862	0.245283	0.95122
ADRA1A_ENST00000358857	ADRA1A_ENST00000358857	0.368852	0.581967	0.0491803	ADRA1A_ENST00000358857	0.633803	0.084507	0.133333	ADRA1A_ENST00000358857	0.584416	1.39216	0.0517241
ADRA1A_ENST00000380572	ADRA1A_ENST00000380572	0.366667	0.591667	0.0416667	ADRA1A_ENST00000380572	0.619718	0.0704225	0.113636	ADRA1A_ENST00000380572	0.578947	1.44898	0.0434783
ADRA1B	ADRA1B	0.422018	0.577982	0	ADRA1B	0.730159	0	0	ADRA1B	0.730159	1.36957	0
AFP	AFP	0.147541	0.819672	0.0327869
AGAP6	AGAP6	0.117117	0.81982	0.0630631
AGBL3	AGBL3	0.0944882	0.732283	0.173228					AGBL3	0.104348	2.73529	0.209524
AGBL3_ENST00000458078	AGBL3_ENST00000458078	0.103448	0.724138	0.172414					AGBL3_ENST00000458078	0.115385	2.625	0.208333
AGT	AGT	0.323171	0.560976	0.115854
AGTPBP1_ENST00000376109	AGTPBP1_ENST00000376109	0.0840336	0.823529	0.092437	AGTPBP1_ENST00000376109	0.102041	0.112245	1.1	AGTPBP1_ENST00000376109	0.0917431	4.66667	0.101852
AIM2	AIM2	0.119048	0.674603	0.206349	AIM2	0.176471	0.305882	1.73333	AIM2	0.135135	2.07317	0.26
AKAP7	AKAP7	0.13913	0.408696	0.452174	AKAP7	0.340426	1.10638	3.25	AKAP7	0.161616	0.691176	0.825397
AKT1	AKT1	0.0667976	0.923379	0.00982318	AKT1	0.0723404	0.0106383	0.147059	AKT1	0.0715789	12.0513	0.00992063
ALK	ALK	0.140781	0.818347	0.0408719
ALPL					ALPL	0.594595	0.045045	0.0757576	ALPL	0.568966	1.56338	0.0282486
ALX4	ALX4	0.244048	0.589286	0.166667	ALX4	0.414141	0.282828	0.682927
AMDHD2_ENST00000413459					AMDHD2_ENST00000413459	0.596774	0.0645161	0.108108	AMDHD2_ENST00000413459	0.560606	1.5122	0.040404
AMER1	AMER1	0.0836364	0.569091	0.347273	AMER1	0.146965	0.610224	4.15217	AMER1	0.0912698	1.32068	0.532033
AMIGO3	AMIGO3	0.392405	0.588608	0.0189873	AMIGO3	0.666667	0.0322581	0.0483871	AMIGO3	0.645833	1.43077	0.0193548
ANGPTL2	ANGPTL2	0.357724	0.544715	0.097561	ANGPTL2	0.656716	0.179104	0.272727	ANGPTL2	0.556962	1.19643	0.108108
ANKMY1_ENST00000361678					ANKMY1_ENST00000361678	0.596154	0.105769	0.177419
ANKMY1_ENST00000405523	ANKMY1_ENST00000405523	0.379845	0.542636	0.0775194	ANKMY1_ENST00000405523	0.7	0.142857	0.204082	ANKMY1_ENST00000405523	0.6125	1.18644	0.0840336
ANKRD31_ENST00000274361	ANKRD31_ENST00000274361	0.107527	0.784946	0.107527
ANKRD33					ANKRD33	0.589041	0.109589	0.186047
ANKRD56	ANKRD56	0.139344	0.836066	0.0245902
ANKS3	ANKS3	0.366972	0.559633	0.0733945	ANKS3	0.655738	0.131148	0.2	ANKS3	0.57971	1.27083	0.0792079
ANO10	ANO10	0.164384	0.691781	0.143836
ANTXR2	ANTXR2	0.174242	0.651515	0.174242	ANTXR2	0.267442	0.267442	1	ANTXR2	0.211009	1.86957	0.211009
ANXA10	ANXA10	0.12605	0.815126	0.0588235
AP1B1	AP1B1	0.371287	0.60396	0.0247525	AP1B1	0.614754	0.0409836	0.0666667	AP1B1	0.590551	1.525	0.0253807
AP1B1_ENST00000415447	AP1B1_ENST00000415447	0.411765	0.561497	0.026738	AP1B1_ENST00000415447	0.733333	0.047619	0.0649351	AP1B1_ENST00000415447	0.7	1.28049	0.0274725
AP1M1	AP1M1	0.353448	0.568966	0.0775862	AP1M1	0.621212	0.136364	0.219512
AP2A2	AP2A2	0.248756	0.606965	0.144279
APC	APC	0.0341863	0.217195	0.748618	APC	0.157399	3.44675	21.8982	APC	0.0353964	0.277458	2.97801
APPL1	APPL1	0.157534	0.691781	0.150685
AQP7	AQP7	0.370629	0.622378	0.00699301	AQP7	0.595506	0.011236	0.0188679	AQP7	0.588889	1.64815	0.00704225
AQP7_ENST00000539936									AQP7_ENST00000539936	0.570621	1.75248	0
AR_ENST00000396043	AR_ENST00000396043	0.0421941	0.894515	0.0632911	AR_ENST00000396043	0.0471698	0.0707547	1.5	AR_ENST00000396043	0.0440529	8.48	0.0675676
ARFGAP3	ARFGAP3	0.196078	0.588235	0.215686	ARFGAP3	0.333333	0.366667	1.1	ARFGAP3	0.243902	1.42857	0.275
ARHGAP11A	ARHGAP11A	0.115942	0.826087	0.057971
ARHGEF16	ARHGEF16	0.366412	0.618321	0.0152672	ARHGEF16	0.592593	0.0246914	0.0416667	ARHGEF16	0.578313	1.62	0.0155039
ARID1A	ARID1A	0.0472561	0.414634	0.53811	ARID1A	0.113971	1.29779	11.3871	ARID1A	0.0496	0.708333	1.16502
ARID1B	ARID1B	0.149588	0.697291	0.153121
ARID2	ARID2	0.0839844	0.597656	0.318359	ARID2	0.140523	0.53268	3.7907	ARID2	0.0916844	1.48544	0.467049
ARID5A	ARID5A	0.353448	0.586207	0.0603448	ARID5A	0.602941	0.102941	0.170732
ARL13B_ENST00000394222	ARL13B_ENST00000394222	0.144231	0.701923	0.153846
ASMTL	ASMTL	0.369318	0.613636	0.0170455	ASMTL	0.601852	0.0277778	0.0461538	ASMTL	0.585586	1.58824	0.017341
ASMTL_ENST00000381317	ASMTL_ENST00000381317	0.368098	0.613497	0.0184049	ASMTL_ENST00000381317	0.6	0.03	0.05	ASMTL_ENST00000381317	0.582524	1.5873	0.01875
ASTE1	ASTE1	0.193103	0.662069	0.144828
ASXL1	ASXL1	0.112861	0.576115	0.311024	ASXL1	0.1959	0.539863	2.75581	ASXL1	0.127219	1.35913	0.451429
ASXL1_ENST00000306058	ASXL1_ENST00000306058	0.118361	0.602428	0.279211	ASXL1_ENST00000306058	0.196474	0.463476	2.35897	ASXL1_ENST00000306058	0.134251	1.51527	0.387368
ASXL2	ASXL2	0.134831	0.705056	0.160112
ASXL2_ENST00000435504	ASXL2_ENST00000435504	0.122449	0.725417	0.152134
ATAD2	ATAD2	0.135447	0.717579	0.146974
ATG14	ATG14	0.150943	0.698113	0.150943
ATHL1									ATHL1	0.564103	1.71111	0.00826446
ATM	ATM	0.0652568	0.74864	0.186103	ATM	0.0871671	0.248588	2.85185	ATM	0.0698125	2.97837	0.228656
ATM_ENST00000278616	ATM_ENST00000278616	0.0641749	0.746121	0.189704	ATM_ENST00000278616	0.0860113	0.254253	2.95604	ATM_ENST00000278616	0.0685757	2.93889	0.234117
ATP11B	ATP11B	0.143939	0.708333	0.147727
ATP2B3									ATP2B3	0.560166	1.62937	0.0217391
ATP2B3_ENST00000370186									ATP2B3_ENST00000370186	0.563025	1.61972	0.021978
ATP6V1B1	ATP6V1B1	0.24375	0.53125	0.225	ATP6V1B1	0.458824	0.423529	0.923077	ATP6V1B1	0.322314	1.13333	0.290323
ATR	ATR	0.111483	0.780379	0.108138
ATRX	ATRX	0.0754098	0.702459	0.222131	ATRX	0.107351	0.316219	2.94565	ATRX	0.0815603	2.36088	0.285564
ATRX_ENST00000373344	ATRX_ENST00000373344	0.0765262	0.706793	0.216681	ATRX_ENST00000373344	0.108273	0.306569	2.83146	ATRX_ENST00000373344	0.0828678	2.41056	0.276619
AURKA	AURKA	0.100629	0.798742	0.100629
AXIN1	AXIN1	0.10274	0.621575	0.275685	AXIN1	0.165289	0.443526	2.68333	AXIN1	0.114504	1.64253	0.380615
AXIN2	AXIN2	0.120853	0.708531	0.170616					AXIN2	0.137466	2.43089	0.205714
B2M	B2M	0.0565217	0.617391	0.326087	B2M	0.0915493	0.528169	5.76923	B2M	0.0599078	1.61364	0.483871
B2M_ENST00000544417	B2M_ENST00000544417	0.0869565	0.63587	0.277174	B2M_ENST00000544417	0.136752	0.435897	3.1875	B2M_ENST00000544417	0.0952381	1.74627	0.383459
B3GALT1	B3GALT1	0.207792	0.551948	0.24026	B3GALT1	0.376471	0.435294	1.15625	B3GALT1	0.262295	1.23188	0.316239
BAIAP2L1	BAIAP2L1	0.305195	0.577922	0.116883
BAP1	BAP1	0.0645695	0.637417	0.298013	BAP1	0.101299	0.467532	4.61538	BAP1	0.0690265	1.75799	0.424528
BARD1	BARD1	0.108434	0.811245	0.0803213
BARD1_ENST00000260947	BARD1_ENST00000260947	0.112033	0.809129	0.0788382
BARHL2	BARHL2	0.367647	0.610294	0.0220588	BARHL2	0.60241	0.0361446	0.06	BARHL2	0.581395	1.56604	0.0225564
BCL11A									BCL11A	0.558491	1.59748	0.0273632
BCL11A_ENST00000356842	BCL11A_ENST00000356842	0.36962	0.602532	0.0278481	BCL11A_ENST00000356842	0.613445	0.0462185	0.0753425	BCL11A_ENST00000356842	0.586345	1.51592	0.0286458
BCL2_ENST00000444484									BCL2_ENST00000444484	0.550725	1.7913	0.003125
BCL6	BCL6	0.133117	0.834416	0.0324675
BCL9L	BCL9L	0.225446	0.620536	0.154018	BCL9L	0.363309	0.248201	0.683168
BCL9L_ENST00000392849	BCL9L_ENST00000392849	0.215496	0.619855	0.164649	BCL9L_ENST00000392849	0.347656	0.265625	0.764045
BCMO1					BCMO1	0.602273	0.0795455	0.132075	BCMO1	0.557895	1.46667	0.0496454
BCOR	BCOR	0.155102	0.661224	0.183673	BCOR	0.234568	0.277778	1.18421	BCOR	0.183575	1.95181	0.225
BCOR_ENST00000378444	BCOR_ENST00000378444	0.157819	0.688666	0.153515
BCOR_ENST00000378463	BCOR_ENST00000378463	0.130282	0.714789	0.15493
BCORL1	BCORL1	0.25	0.598077	0.151923	BCORL1	0.418006	0.254019	0.607692
BDKRB2	BDKRB2	0.37415	0.564626	0.0612245	BDKRB2	0.662651	0.108434	0.163636	BDKRB2	0.597826	1.29687	0.0652174
BICC1_ENST00000263103	BICC1_ENST00000263103	0.136986	0.815068	0.0479452
BIN1	BIN1	0.354839	0.572581	0.0725806	BIN1	0.619718	0.126761	0.204545	BIN1	0.55	1.33962	0.0782609
BIRC2	BIRC2	0.145455	0.818182	0.0363636
BIRC3	BIRC3	0.0894737	0.773684	0.136842	BIRC3	0.115646	0.176871	1.52941	BIRC3	0.0982659	3.4186	0.158537
BMPR2	BMPR2	0.13141	0.519231	0.349359	BMPR2	0.253086	0.67284	2.65854	BMPR2	0.151292	1.08	0.536946
BPI	BPI	0.359281	0.586826	0.0538922	BPI	0.612245	0.0918367	0.15	BPI	0.560748	1.42029	0.056962
BRAF	BRAF	0.0147	0.978546	0.00675407	BRAF	0.0150223	0.00690215	0.459459	BRAF	0.0149194	45.6111	0.0068
BRCA1	BRCA1	0.1051	0.777434	0.117465
BRCA1_ENST00000471181	BRCA1_ENST00000471181	0.11147	0.799677	0.088853
BRCA2	BRCA2	0.102389	0.761092	0.136519
BRCA2_ENST00000544455	BRCA2_ENST00000544455	0.104371	0.769848	0.125781
BRD7	BRD7	0.17341	0.583815	0.242775	BRD7	0.29703	0.415842	1.4	BRD7	0.20979	1.40278	0.320611
BRE	BRE	0.151786	0.696429	0.151786
BRE_ENST00000342045	BRE_ENST00000342045	0.128713	0.70297	0.168317					BRE_ENST00000342045	0.147727	2.36667	0.202381
BRIP1	BRIP1	0.106329	0.837975	0.0556962
BRIP1_ENST00000259008	BRIP1_ENST00000259008	0.108808	0.836788	0.0544041
BTBD17	BTBD17	0.370968	0.620968	0.00806452	BTBD17	0.597403	0.012987	0.0217391	BTBD17	0.589744	1.6383	0.00813008
BTBD7_ENST00000298896	BTBD7_ENST00000298896	0.306306	0.54955	0.144144	BTBD7_ENST00000298896	0.557377	0.262295	0.470588
BTN3A1	BTN3A1	0.378151	0.563025	0.0588235	BTN3A1	0.671642	0.104478	0.155556	BTN3A1	0.608108	1.28846	0.0625
C10orf68	C10orf68	0.172414	0.678161	0.149425
C12orf26	C12orf26	0.113924	0.810127	0.0759494
C14orf39	C14orf39	0.144796	0.701357	0.153846
C14orf43	C14orf43	0.212928	0.539924	0.247148	C14orf43	0.394366	0.457746	1.16071	C14orf43	0.270531	1.17355	0.328283
C15orf27	C15orf27	0.393701	0.598425	0.00787402	C15orf27	0.657895	0.0131579	0.02	C15orf27	0.649351	1.4902	0.00793651
C15orf33	C15orf33	0.195122	0.658537	0.146341
C16orf88	C16orf88	0.230159	0.571429	0.198413	C16orf88	0.402778	0.347222	0.862069	C16orf88	0.298969	1.33333	0.247525
C17orf28	C17orf28	0.365169	0.601124	0.0337079	C17orf28	0.607477	0.0560748	0.0923077	C17orf28	0.575221	1.50704	0.0348837
C17orf63	C17orf63	0.457746	0.471831	0.0704225	C17orf63	0.970149	0.149254	0.153846	C17orf63	0.844156	0.893333	0.0757576
C17orf63_ENST00000341217	C17orf63_ENST00000341217	0.446809	0.48227	0.070922	C17orf63_ENST00000341217	0.926471	0.147059	0.15873	C17orf63_ENST00000341217	0.807692	0.931507	0.0763359
C17orf70	C17orf70	0.393617	0.590426	0.0159574	C17orf70	0.666667	0.027027	0.0405405	C17orf70	0.649123	1.44156	0.0162162
C17orf70_ENST00000327787	C17orf70_ENST00000327787	0.385366	0.595122	0.0195122	C17orf70_ENST00000327787	0.647541	0.0327869	0.0506329	C17orf70_ENST00000327787	0.626984	1.46988	0.0199005
C18orf34	C18orf34	0.129412	0.714706	0.155882
C18orf34_ENST00000383096	C18orf34_ENST00000383096	0.134078	0.709497	0.156425
C1orf114	C1orf114	0.160256	0.673077	0.166667	C1orf114	0.238095	0.247619	1.04
C22orf28	C22orf28	0.190476	0.609524	0.2	C22orf28	0.3125	0.328125	1.05	C22orf28	0.235294	1.56098	0.25
C2orf67	C2orf67	0.174603	0.671958	0.153439
C5AR1									C5AR1	0.551724	1.8125	0
C7orf72	C7orf72	0.0970874	0.854369	0.0485437	C7orf72	0.113636	0.0568182	0.5
C8orf45	C8orf45	0.0942029	0.826087	0.0797101	C8orf45	0.114035	0.0964912	0.846154
C9orf131	C9orf131	0.151786	0.674107	0.174107	C9orf131	0.225166	0.258278	1.14706	C9orf131	0.178947	2.06849	0.210811
CACNB1	CACNB1	0.385321	0.559633	0.0550459	CACNB1	0.688525	0.0983607	0.142857	CACNB1	0.626866	1.27083	0.0582524
CACNG2	CACNG2	0.438017	0.495868	0.0661157	CACNG2	0.883333	0.133333	0.150943	CACNG2	0.779412	0.983607	0.0707965
CACNG5									CACNG5	0.567568	1.63636	0.0175439
CALB2	CALB2	0.37963	0.583333	0.037037	CALB2	0.650794	0.0634921	0.097561	CALB2	0.61194	1.4	0.0384615
CaMK1b	CaMK1b	0.407407	0.583333	0.00925926	CaMK1b	0.698413	0.015873	0.0227273	CaMK1b	0.6875	1.4	0.00934579
CAPS2_ENST00000409445	CAPS2_ENST00000409445	0.113043	0.817391	0.0695652
CARD9_ENST00000371734					CARD9_ENST00000371734	0.597561	0.0731707	0.122449	CARD9_ENST00000371734	0.556818	1.49091	0.0458015
CASP5_ENST00000393141	CASP5_ENST00000393141	0.173653	0.670659	0.155689
CASP8	CASP8	0.0536913	0.677852	0.268456	CASP8	0.0792079	0.39604	5	CASP8	0.0567376	2.10417	0.366972
CASP8_ENST00000264275	CASP8_ENST00000264275	0.0498753	0.683292	0.266833	CASP8_ENST00000264275	0.0729927	0.390511	5.35	CASP8_ENST00000264275	0.0524934	2.15748	0.363946
CASP8_ENST00000358485	CASP8_ENST00000358485	0.0454545	0.690909	0.263636	CASP8_ENST00000358485	0.0657895	0.381579	5.8	CASP8_ENST00000358485	0.047619	2.23529	0.358025
CBFB_ENST00000290858	CBFB_ENST00000290858	0.0956522	0.678261	0.226087	CBFB_ENST00000290858	0.141026	0.333333	2.36364	CBFB_ENST00000290858	0.105769	2.10811	0.292135
CBFB_ENST00000412916	CBFB_ENST00000412916	0.08	0.688	0.232	CBFB_ENST00000412916	0.116279	0.337209	2.9	CBFB_ENST00000412916	0.0869565	2.20513	0.302083
CBLN4	CBLN4	0.368932	0.621359	0.00970874	CBLN4	0.59375	0.015625	0.0263158	CBLN4	0.584615	1.64103	0.00980392
CBX6	CBX6	0.385321	0.605505	0.00917431	CBX6	0.636364	0.0151515	0.0238095	CBX6	0.626866	1.53488	0.00925926
CCDC116	CCDC116	0.373418	0.620253	0.00632911	CCDC116	0.602041	0.0102041	0.0169492	CCDC116	0.59596	1.63333	0.00636943
CCDC28A	CCDC28A	0.192	0.56	0.248	CCDC28A	0.342857	0.442857	1.29167	CCDC28A	0.237624	1.27273	0.329787
CCDC35	CCDC35	0.147541	0.827869	0.0245902
CCDC41	CCDC41	0.147541	0.680328	0.172131	CCDC41	0.216867	0.253012	1.16667	CCDC41	0.173077	2.12821	0.207921
CCDC66	CCDC66	0.104839	0.669355	0.225806	CCDC66	0.156627	0.337349	2.15385	CCDC66	0.117117	2.02439	0.291667
CCDC66_ENST00000394672	CCDC66_ENST00000394672	0.0970149	0.664179	0.238806	CCDC66_ENST00000394672	0.146067	0.359551	2.46154	CCDC66_ENST00000394672	0.107438	1.97778	0.313725
CCDC66_ENST00000436465	CCDC66_ENST00000436465	0.102564	0.709402	0.188034	CCDC66_ENST00000436465	0.144578	0.26506	1.83333	CCDC66_ENST00000436465	0.114286	2.44118	0.231579
CCDC73	CCDC73	0.172285	0.636704	0.191011	CCDC73	0.270588	0.3	1.1087	CCDC73	0.208145	1.75258	0.236111
CCDC82	CCDC82	0.169643	0.678571	0.151786
CCND2	CCND2	0.14094	0.818792	0.0402685
CCND3	CCND3	0.154472	0.691057	0.154472
CCNE1	CCNE1	0.108696	0.84058	0.0507246
CCNJL	CCNJL	0.373832	0.570093	0.0560748	CCNJL	0.655738	0.0983607	0.15	CCNJL	0.597015	1.32609	0.0594059
CCR4	CCR4	0.134831	0.421348	0.44382	CCR4	0.32	1.05333	3.29167	CCR4	0.155844	0.728155	0.79798
CCR7	CCR7	0.214286	0.492063	0.293651	CCR7	0.435484	0.596774	1.37037	CCR7	0.272727	0.96875	0.41573
CCT3	CCT3	0.174242	0.659091	0.166667	CCT3	0.264368	0.252874	0.956522
CCT7_ENST00000258091	CCT7_ENST00000258091	0.380165	0.53719	0.0826446	CCT7_ENST00000258091	0.707692	0.153846	0.217391	CCT7_ENST00000258091	0.613333	1.16071	0.0900901
CD79A	CD79A	0.145631	0.650485	0.203883	CD79A	0.223881	0.313433	1.4	CD79A	0.170455	1.86111	0.256098
CD79B	CD79B	0.113475	0.801418	0.0851064
CD93	CD93	0.314465	0.559748	0.125786
CDC14A	CDC14A	0.2125	0.61875	0.16875	CDC14A	0.343434	0.272727	0.794118	CDC14A	0.269841	1.62295	0.203008
CDC14A_ENST00000361544	CDC14A_ENST00000361544	0.224638	0.623188	0.152174
CDC23	CDC23	0.155172	0.827586	0.0172414
CDC7	CDC7	0.134454	0.605042	0.260504	CDC7	0.222222	0.430556	1.9375	CDC7	0.15534	1.53191	0.352273
CDC73	CDC73	0.0608365	0.737643	0.201521	CDC73	0.0824742	0.273196	3.3125	CDC73	0.0647773	2.81159	0.252381
CDCA7L	CDCA7L	0.132743	0.725664	0.141593
CDCP2	CDCP2	0.46789	0.513761	0.0183486	CDCP2	0.910714	0.0357143	0.0392157	CDCP2	0.87931	1.0566	0.0186916
CDH1	CDH1	0.104566	0.621502	0.273932	CDH1	0.168246	0.440758	2.61972	CDH1	0.116776	1.64202	0.377282
CDH26	CDH26	0.27931	0.562069	0.158621	CDH26	0.496933	0.282209	0.567901
CDK12	CDK12	0.131532	0.700901	0.167568					CDK12	0.151452	2.34337	0.201299
CDK18_ENST00000429964									CDK18_ENST00000429964	0.567901	1.64583	0.016
CDK8	CDK8	0.0891089	0.767327	0.143564	CDK8	0.116129	0.187097	1.61111	CDK8	0.0978261	3.29787	0.16763
CDKAL1	CDKAL1	0.154545	0.827273	0.0181818
CDKN1A	CDKN1A	0.102941	0.669118	0.227941	CDKN1A	0.153846	0.340659	2.21429	CDKN1A	0.114754	2.02222	0.295238
CDKN1A_ENST00000448526	CDKN1A_ENST00000448526	0.12	0.664	0.216	CDKN1A_ENST00000448526	0.180723	0.325301	1.8	CDKN1A_ENST00000448526	0.136364	1.97619	0.27551
CDKN1B	CDKN1B	0.0769231	0.469231	0.453846	CDKN1B	0.163934	0.967213	5.9	CDKN1B	0.0833333	0.884058	0.830986
CDKN2A	CDKN2A	0.0705882	0.563866	0.365546	CDKN2A	0.125186	0.648286	5.17857	CDKN2A	0.0759494	1.29287	0.576159
CDKN2A_ENST00000446177	CDKN2A_ENST00000446177	0.0577664	0.550706	0.391528	CDKN2A_ENST00000446177	0.104895	0.710956	6.77778	CDKN2A_ENST00000446177	0.0613079	1.22571	0.64346
CDKN2A_ENST00000498124	CDKN2A_ENST00000498124	0.0562092	0.563399	0.380392	CDKN2A_ENST00000498124	0.099768	0.675174	6.76744	CDKN2A_ENST00000498124	0.0595568	1.29042	0.613924
CEBPA	CEBPA	0.115942	0.623188	0.26087	CEBPA	0.186047	0.418605	2.25	CEBPA	0.131148	1.65385	0.352941
CENPC1	CENPC1	0.130435	0.664596	0.204969	CENPC1	0.196262	0.308411	1.57143	CENPC1	0.15	1.98148	0.257812
CEP135	CEP135	0.10628	0.748792	0.144928
CEP290	CEP290	0.134021	0.695876	0.170103					CEP290	0.154762	2.28814	0.204969
CEP290_ENST00000309041	CEP290_ENST00000309041	0.0935961	0.817734	0.08867	CEP290_ENST00000309041	0.114458	0.108434	0.947368
CEP95	CEP95	0.154839	0.703226	0.141935
CEP95_ENST00000556440	CEP95_ENST00000556440	0.146667	0.706667	0.146667
CERK	CERK	0.206612	0.595041	0.198347	CERK	0.347222	0.333333	0.96	CERK	0.260417	1.46939	0.247423
CES5A	CES5A	0.346154	0.56044	0.0934066	CES5A	0.617647	0.166667	0.269841
CES5A_ENST00000521992	CES5A_ENST00000521992	0.333333	0.583333	0.0833333
CETP	CETP	0.393443	0.540984	0.0655738	CETP	0.727273	0.121212	0.166667	CETP	0.648649	1.17857	0.0701754
CFHR3	CFHR3	0.119497	0.823899	0.0566038
CFI	CFI	0.231579	0.621053	0.147368
CHD1L	CHD1L	0.121387	0.83815	0.0404624
CHD1L_ENST00000369258	CHD1L_ENST00000369258	0.106557	0.852459	0.0409836
CHD5_ENST00000262450									CHD5_ENST00000262450	0.551313	1.62097	0.0268562
CHEK1	CHEK1	0.0897436	0.75	0.160256					CHEK1	0.0985915	3	0.19084
CHEK2	CHEK2	0.0740741	0.831276	0.0946502	CHEK2	0.0891089	0.113861	1.27778	CHEK2	0.08	4.92683	0.104545
CHEK2_ENST00000382580	CHEK2_ENST00000382580	0.0580645	0.83871	0.103226	CHEK2_ENST00000382580	0.0692308	0.123077	1.77778	CHEK2_ENST00000382580	0.0616438	5.2	0.115108
CHRM4	CHRM4	0.385135	0.560811	0.0540541	CHRM4	0.686747	0.0963855	0.140351	CHRM4	0.626374	1.27692	0.0571429
CHRNB2									CHRNB2	0.561983	1.7	0.0106952
CHRNG					CHRNG	0.605634	0.0704225	0.116279	CHRNG	0.565789	1.47917	0.0438596
CHST11									CHST11	0.552941	1.64	0.0232558
CHST12	CHST12	0.40411	0.582192	0.0136986	CHST12	0.694118	0.0235294	0.0338983	CHST12	0.678161	1.39344	0.0138889
CHST4					CHST4	0.6	0.0933333	0.155556
CHUK	CHUK	0.116129	0.729032	0.154839
CKAP2	CKAP2	0.1875	0.585938	0.226562	CKAP2	0.32	0.386667	1.20833	CKAP2	0.230769	1.41509	0.292929
CLCN3	CLCN3	0.202128	0.648936	0.148936
CLCN7	CLCN7	0.382514	0.590164	0.0273224	CLCN7	0.648148	0.0462963	0.0714286	CLCN7	0.619469	1.44	0.0280899
CLOCK	CLOCK	0.143713	0.670659	0.185629	CLOCK	0.214286	0.276786	1.29167	CLOCK	0.167832	2.03636	0.227941
CNKSR3					CNKSR3	0.594937	0.0759494	0.12766	CNKSR3	0.552941	1.49057	0.047619
CNTN6	CNTN6	0.180033	0.667758	0.152209
COBLL1	COBLL1	0.146179	0.694352	0.159468
COIL	COIL	0.134328	0.701493	0.164179
COLQ_ENST00000435459	COLQ_ENST00000435459	0.207921	0.643564	0.148515
CPA6_ENST00000518549	CPA6_ENST00000518549	0.201923	0.653846	0.144231
CPEB2	CPEB2	0.139535	0.633721	0.226744	CPEB2	0.220183	0.357798	1.625	CPEB2	0.162162	1.73016	0.293233
CPEB2_ENST00000538197	CPEB2_ENST00000538197	0.17	0.635	0.195	CPEB2_ENST00000538197	0.267717	0.307087	1.14706	CPEB2_ENST00000538197	0.204819	1.73973	0.242236
CPN2					CPN2	0.605505	0.0733945	0.121212	CPN2	0.564103	1.47297	0.0457143
CPSF6	CPSF6	0.124088	0.824818	0.0510949
CPSF6_ENST00000435070	CPSF6_ENST00000435070	0.124088	0.824818	0.0510949
CREBBP	CREBBP	0.115467	0.720599	0.163934
CRHR2					CRHR2	0.586207	0.045977	0.0784314	CRHR2	0.56044	1.58182	0.0289855
CRHR2_ENST00000348438					CRHR2_ENST00000348438	0.597561	0.0487805	0.0816327	CRHR2_ENST00000348438	0.569767	1.54717	0.0305344
CRISPLD2	CRISPLD2	0.392523	0.598131	0.00934579	CRISPLD2	0.65625	0.015625	0.0238095	CRISPLD2	0.646154	1.48837	0.00943396
CRMP1					CRMP1	0.586826	0.0598802	0.102041	CRMP1	0.553672	1.5463	0.0377358
CRP	CRP	0.440678	0.550847	0.00847458	CRP	0.8	0.0153846	0.0192308	CRP	0.787879	1.22642	0.00854701
CRTC1	CRTC1	0.231527	0.605911	0.162562	CRTC1	0.382114	0.268293	0.702128
CRTC1_ENST00000338797	CRTC1_ENST00000338797	0.226601	0.615764	0.157635	CRTC1_ENST00000338797	0.368	0.256	0.695652
CTCF	CTCF	0.0759259	0.675926	0.248148	CTCF	0.112329	0.367123	3.26829	CTCF	0.0821643	2.08571	0.330049
CTLA4	CTLA4	0.161905	0.685714	0.152381
CTNNB1	CTNNB1	0.0142914	0.971417	0.0142914	CTNNB1	0.0147119	0.0147119	1	CTNNB1	0.0144986	33.9861	0.0144986
CTNND1	CTNND1	0.135965	0.688596	0.175439	CTNND1	0.197452	0.254777	1.29032	CTNND1	0.15736	2.21127	0.212766
CTNND1_ENST00000399050	CTNND1_ENST00000399050	0.127753	0.700441	0.171806	CTNND1_ENST00000399050	0.18239	0.245283	1.34483	CTNND1_ENST00000399050	0.146465	2.33824	0.207447
CTSG	CTSG	0.328467	0.583942	0.0875912
CUL3	CUL3	0.111111	0.788194	0.100694
CWF19L2_ENST00000282251	CWF19L2_ENST00000282251	0.140541	0.708108	0.151351
CX3CR1	CX3CR1	0.388889	0.583333	0.0277778	CX3CR1	0.666667	0.047619	0.0714286	CX3CR1	0.636364	1.4	0.0285714
CX3CR1_ENST00000358309	CX3CR1_ENST00000358309	0.373239	0.598592	0.028169	CX3CR1_ENST00000358309	0.623529	0.0470588	0.0754717	CX3CR1_ENST00000358309	0.595506	1.49123	0.0289855
CXorf30	CXorf30	0.138158	0.815789	0.0460526
CXorf30_ENST00000378657	CXorf30_ENST00000378657	0.130719	0.816993	0.0522876
CXXC1	CXXC1	0.130682	0.829545	0.0397727
CYLD	CYLD	0.172996	0.599156	0.227848	CYLD	0.288732	0.380282	1.31707	CYLD	0.209184	1.49474	0.295082
CYLD_ENST00000427738	CYLD_ENST00000427738	0.179245	0.679245	0.141509
CYP27A1	CYP27A1	0.416	0.56	0.024	CYP27A1	0.742857	0.0428571	0.0576923	CYP27A1	0.712329	1.27273	0.0245902
CYP39A1	CYP39A1	0.118812	0.831683	0.049505
CYP4F11	CYP4F11	0.366379	0.603448	0.0301724	CYP4F11	0.607143	0.05	0.0823529	CYP4F11	0.578231	1.52174	0.0311111
CYP4F2					CYP4F2	0.590909	0.0606061	0.102564	CYP4F2	0.557143	1.53488	0.0380952
CSNK2A1	CSNK2A1	0.141667	0.675	0.183333	CSNK2A1	0.209877	0.271605	1.29412	CSNK2A1	0.165049	2.07692	0.22449
DAGLB	DAGLB	0.384146	0.591463	0.0243902	DAGLB	0.649485	0.0412371	0.0634921	DAGLB	0.623762	1.44776	0.025
DAXX	DAXX	0.157051	0.689103	0.153846
DAZAP1	DAZAP1	0.179104	0.58209	0.238806	DAZAP1	0.307692	0.410256	1.33333	DAZAP1	0.218182	1.39286	0.313725
DDO	DDO	0.299213	0.582677	0.11811
DDX17	DDX17	0.117978	0.735955	0.146067
DDX17_ENST00000381633	DDX17_ENST00000381633	0.111111	0.734568	0.154321
DDX26B	DDX26B	0.22	0.61	0.17	DDX26B	0.360656	0.278689	0.772727	DDX26B	0.282051	1.5641	0.204819
DDX26B_ENST00000370752	DDX26B_ENST00000370752	0.23301	0.621359	0.145631
DDX27	DDX27	0.172566	0.646018	0.181416	DDX27	0.267123	0.280822	1.05128	DDX27	0.208556	1.825	0.221622
DDX3X	DDX3X	0.0989399	0.819788	0.0812721
DDX4_ENST00000511853	DDX4_ENST00000511853	0.115385	0.8	0.0846154
DENND1A_ENST00000373618	DENND1A_ENST00000373618	0.372549	0.578431	0.0490196	DENND1A_ENST00000373618	0.644068	0.0847458	0.131579	DENND1A_ENST00000373618	0.59375	1.37209	0.0515464
DENND1A_ENST00000373620	DENND1A_ENST00000373620	0.372881	0.584746	0.0423729	DENND1A_ENST00000373620	0.637681	0.0724638	0.113636	DENND1A_ENST00000373620	0.594595	1.40816	0.0442478
DENND4C	DENND4C	0.141176	0.831373	0.027451
DFNA5	DFNA5	0.357143	0.579365	0.0634921	DFNA5	0.616438	0.109589	0.177778	DFNA5	0.555556	1.37736	0.0677966
DHCR7	DHCR7	0.397059	0.588235	0.0147059	DHCR7	0.675	0.025	0.037037	DHCR7	0.658537	1.42857	0.0149254
DHCR7_ENST00000355527	DHCR7_ENST00000355527	0.4	0.584615	0.0153846	DHCR7_ENST00000355527	0.684211	0.0263158	0.0384615	DHCR7_ENST00000355527	0.666667	1.40741	0.015625
DHRS2					DHRS2	0.588235	0.0735294	0.125
DHRS2_ENST00000344777	DHRS2_ENST00000344777	0.362069	0.586207	0.0517241	DHRS2_ENST00000344777	0.617647	0.0882353	0.142857	DHRS2_ENST00000344777	0.567568	1.41667	0.0545455
DHX16	DHX16	0.199095	0.606335	0.19457	DHX16	0.328358	0.320896	0.977273	DHX16	0.248588	1.54023	0.241573
DHX16_ENST00000376437	DHX16_ENST00000376437	0.20354	0.566372	0.230088	DHX16_ENST00000376437	0.359375	0.40625	1.13043	DHX16_ENST00000376437	0.255556	1.30612	0.298851
DHX16_ENST00000376442	DHX16_ENST00000376442	0.210526	0.600877	0.188596	DHX16_ENST00000376442	0.350365	0.313869	0.895833	DHX16_ENST00000376442	0.266667	1.50549	0.232432
DICER1	DICER1	0.110974	0.826141	0.0628853
DIRAS3									DIRAS3	0.560606	1.64103	0.019802
DIS3	DIS3	0.109718	0.818182	0.0721003
DLAT	DLAT	0.155039	0.689922	0.155039
DLL1					DLL1	0.59542	0.0687023	0.115385	DLL1	0.557143	1.50575	0.0430622
DMRT3	DMRT3	0.376404	0.58427	0.0393258	DMRT3	0.644231	0.0673077	0.104478	DMRT3	0.603604	1.40541	0.0409357
DMRTB1	DMRTB1	0.326531	0.585034	0.0884354
DNA2	DNA2	0.194595	0.659459	0.145946
DNAJC11	DNAJC11	0.315789	0.571429	0.112782
DNAJC2	DNAJC2	0.186992	0.658537	0.154472
DNMT3A	DNMT3A	0.0998852	0.791045	0.10907
DOCK3	DOCK3	0.212575	0.642216	0.14521
DOCK3_ENST00000266037	DOCK3_ENST00000266037	0.211429	0.645714	0.142857
DRD2									DRD2	0.555556	1.75758	0.00552486
DRD2_ENST00000355319	DRD2_ENST00000355319	0.372222	0.622222	0.00555556	DRD2_ENST00000355319	0.598214	0.00892857	0.0149254	DRD2_ENST00000355319	0.59292	1.64706	0.00558659
DUSP16	DUSP16	0.262821	0.487179	0.25	DUSP16	0.539474	0.513158	0.95122	DUSP16	0.356522	0.95	0.333333
DUX4L1	DUX4L1	0	0.982759	0.0172414	DUX4L1	0	0.0175439	#DIV/0!	DUX4L1	0	57	0.0175439
DUX4L2	DUX4L2	0	1	0	DUX4L2	0	0	#DIV/0!	DUX4L2	0	#DIV/0!	0
DYNC1I2	DYNC1I2	0.162602	0.609756	0.227642	DYNC1I2	0.266667	0.373333	1.4	DYNC1I2	0.194175	1.5625	0.294737
DYNC1LI1	DYNC1LI1	0.273585	0.575472	0.150943	DYNC1LI1	0.47541	0.262295	0.551724
DYRK1A	DYRK1A	0.300412	0.576132	0.123457
DYRK1A_ENST00000338785	DYRK1A_ENST00000338785	0.132353	0.676471	0.191176	DYRK1A_ENST00000338785	0.195652	0.282609	1.44444	DYRK1A_ENST00000338785	0.152542	2.09091	0.236364
EED	EED	0.104478	0.813433	0.0820896
EEF1D	EEF1D	0.380952	0.595238	0.0238095	EEF1D	0.64	0.04	0.0625	EEF1D	0.615385	1.47059	0.0243902
EEF1D_ENST00000423316	EEF1D_ENST00000423316	0.404762	0.587302	0.00793651	EEF1D_ENST00000423316	0.689189	0.0135135	0.0196078	EEF1D_ENST00000423316	0.68	1.42308	0.008
EFHA2	EFHA2	0.108696	0.76087	0.130435
EGFR	EGFR	0.0813524	0.904913	0.0137348	EGFR	0.0899008	0.0151781	0.168831	EGFR	0.0885566	9.51667	0.0139261
EGFR_ENST00000342916	EGFR_ENST00000342916	0.113971	0.875	0.0110294
EGFR_ENST00000344576	EGFR_ENST00000344576	0.147573	0.834951	0.0174757
EGFR_ENST00000442591	EGFR_ENST00000442591	0.122867	0.863481	0.0136519
EGR4	EGR4	0.394495	0.577982	0.0275229	EGR4	0.68254	0.047619	0.0697674	EGR4	0.651515	1.36957	0.0283019
EHD1					EHD1	0.602273	0.0681818	0.113208	EHD1	0.56383	1.49153	0.0425532
EHD3	EHD3	0.389744	0.579487	0.0307692	EHD3	0.672566	0.0530973	0.0789474	EHD3	0.638655	1.37805	0.031746
EHD4	EHD4	0.366906	0.561151	0.0719424	EHD4	0.653846	0.128205	0.196078	EHD4	0.579545	1.27869	0.0775194
EIF1AX	EIF1AX	0.0396825	0.928571	0.031746	EIF1AX	0.042735	0.034188	0.8	EIF1AX	0.0413223	13	0.0327869
EIF2AK1	EIF2AK1	0.215569	0.60479	0.179641	EIF2AK1	0.356436	0.29703	0.833333	EIF2AK1	0.274809	1.5303	0.218978
EIF2AK1_ENST00000536084	EIF2AK1_ENST00000536084	0.208955	0.574627	0.216418	EIF2AK1_ENST00000536084	0.363636	0.376623	1.03571	EIF2AK1_ENST00000536084	0.264151	1.35088	0.27619
EME2	EME2	0.365385	0.557692	0.0769231	EME2	0.655172	0.137931	0.210526	EME2	0.575758	1.26087	0.0833333
EME2_ENST00000307394	EME2_ENST00000307394	0.398058	0.572816	0.0291262	EME2_ENST00000307394	0.694915	0.0508475	0.0731707	EME2_ENST00000307394	0.66129	1.34091	0.03
ENG	ENG	0.405172	0.525862	0.0689655	ENG	0.770492	0.131148	0.170213	ENG	0.681159	1.10909	0.0740741
ENG_ENST00000373203	ENG_ENST00000373203	0.389381	0.557522	0.0530973	ENG_ENST00000373203	0.698413	0.0952381	0.136364	ENG_ENST00000373203	0.637681	1.26	0.0560748
ENPP4	ENPP4	0.140741	0.82963	0.0296296
ENPP7					ENPP7	0.596154	0.0480769	0.0806452	ENPP7	0.568807	1.55224	0.0301205
ENSG00000174501	ENSG00000174501	0.131387	0.843066	0.0255474
ENSG00000198064	ENSG00000198064	0.386555	0.613445	0	ENSG00000198064	0.630137	0	0	ENSG00000198064	0.630137	1.58696	0
ENSG00000226807					ENSG00000226807	0.58642	0.0740741	0.126316
ENTPD2	ENTPD2	0.448276	0.448276	0.103448	ENTPD2	1	0.230769	0.230769	ENTPD2	0.8125	0.8125	0.115385
EP300	EP300	0.0778872	0.772605	0.149508	EP300	0.100811	0.193511	1.91954	EP300	0.084466	3.39764	0.175789
EPB41L5	EPB41L5	0.176471	0.673203	0.150327
EPB41L5_ENST00000443124	EPB41L5_ENST00000443124	0.144231	0.673077	0.182692	EPB41L5_ENST00000443124	0.214286	0.271429	1.26667	EPB41L5_ENST00000443124	0.168539	2.05882	0.223529
EPHA3_ENST00000452448	EPHA3_ENST00000452448	0.111814	0.78692	0.101266
EPHB2_ENST00000374627									EPHB2_ENST00000374627	0.553763	1.70093	0.0140351
ERBB2	ERBB2	0.0893224	0.89117	0.0195072	ERBB2	0.10023	0.0218894	0.218391	ERBB2	0.0980834	8.18868	0.0198953
ERBB2_ENST00000541774	ERBB2_ENST00000541774	0.0692042	0.918685	0.0121107	ERBB2_ENST00000541774	0.0753296	0.0131827	0.175	ERBB2_ENST00000541774	0.0743494	11.2979	0.0122592
ERBB3	ERBB3	0.10049	0.870098	0.0294118	ERBB3	0.115493	0.0338028	0.292683
ERBB3_ENST00000267101	ERBB3_ENST00000267101	0.0924479	0.885417	0.0221354	ERBB3_ENST00000267101	0.104412	0.025	0.239437	ERBB3_ENST00000267101	0.101865	7.72727	0.0226365
ERBB3_ENST00000411731	ERBB3_ENST00000411731	0.0758621	0.889655	0.0344828	ERBB3_ENST00000411731	0.0852713	0.0387597	0.454545	ERBB3_ENST00000411731	0.0820896	8.0625	0.0357143
ERBB4	ERBB4	0.112712	0.811864	0.0754237
ERBB4_ENST00000402597	ERBB4_ENST00000402597	0.116194	0.806953	0.0768527
ERCC2_ENST00000391945	ERCC2_ENST00000391945	0.114613	0.873926	0.0114613
ERCC2_ENST00000485403	ERCC2_ENST00000485403	0.0652174	0.929348	0.00543478	ERCC2_ENST00000485403	0.0701754	0.00584795	0.0833333	ERCC2_ENST00000485403	0.0697674	13.1538	0.00546448
ERLEC1	ERLEC1	0.158416	0.821782	0.019802
ERRFI1	ERRFI1	0.112676	0.739437	0.147887
ESR1	ESR1	0.104854	0.866019	0.0291262
ESRP1	ESRP1	0.167364	0.585774	0.246862	ESRP1	0.285714	0.421429	1.475	ESRP1	0.201005	1.41414	0.327778
ESRP1_ENST00000433389	ESRP1_ENST00000433389	0.174107	0.611607	0.214286	ESRP1_ENST00000433389	0.284672	0.350365	1.23077	ESRP1_ENST00000433389	0.210811	1.57471	0.272727
ETV1	ETV1	0.113971	0.805147	0.0808824
ETV4_ENST00000319349	ETV4_ENST00000319349	0.368932	0.572816	0.0582524	ETV4_ENST00000319349	0.644068	0.101695	0.157895	ETV4_ENST00000319349	0.584615	1.34091	0.0618557
ETV6	ETV6	0.11254	0.807074	0.0803859
EXOC1	EXOC1	0.115578	0.809045	0.0753769
EXOSC9	EXOSC9	0.193277	0.655462	0.151261
EXT1	EXT1	0.480826	0.486726	0.0324484	EXT1	0.987879	0.0666667	0.0674847	EXT1	0.926136	0.948276	0.0335366
EZH2	EZH2	0.0782241	0.852008	0.0697674	EZH2	0.0918114	0.0818859	0.891892	EZH2	0.0848624	5.75714	0.075
EZH2_ENST00000350995	EZH2_ENST00000350995	0.0895884	0.847458	0.062954	EZH2_ENST00000350995	0.105714	0.0742857	0.702703	EZH2_ENST00000350995	0.0984043	5.55556	0.0671835
FAM108A1	FAM108A1	0.509259	0.490741	0	FAM108A1	1.03774	0	0	FAM108A1	1.03774	0.963636	0
FAM123B_ENST00000330258	FAM123B_ENST00000330258	0.0941558	0.612013	0.293831	FAM123B_ENST00000330258	0.153846	0.480106	3.12069	FAM123B_ENST00000330258	0.103943	1.57741	0.416092
FAM181A					FAM181A	0.584416	0.0649351	0.111111
FAM39B	FAM39B	0.422535	0.570423	0.00704225	FAM39B	0.740741	0.0123457	0.0166667	FAM39B	0.731707	1.32787	0.0070922
FAM55A	FAM55A	0.116788	0.854015	0.0291971
FAM82A1	FAM82A1	0.194444	0.648148	0.157407
FAR2	FAR2	0.22069	0.627586	0.151724
FAS	FAS	0.184211	0.649123	0.166667	FAS	0.283784	0.256757	0.904762
FASTK									FASTK	0.550725	1.675	0.0190476
FAT	FAT	0.148866	0.689541	0.161594
FAT1	FAT1	0.148049	0.685195	0.166756					FAT1	0.173777	2.17657	0.200128
FBRS_ENST00000356166	FBRS_ENST00000356166	0.368852	0.57377	0.057377	FBRS_ENST00000356166	0.642857	0.1	0.155556	FBRS_ENST00000356166	0.584416	1.34615	0.0608696
FBXL18									FBXL18	0.57377	1.66667	0.0105263
FBXL18_ENST00000382368									FBXL18_ENST00000382368	0.56391	1.7013	0.00970874
FBXL18_ENST00000453700									FBXL18_ENST00000453700	0.568	1.64865	0.015544
FBXO11	FBXO11	0.138462	0.830769	0.0307692
FBXO11_ENST00000403359	FBXO11_ENST00000403359	0.134328	0.81592	0.0497512
FBXO7					FBXO7	0.594203	0.101449	0.170732
FBXO7_ENST00000266087	FBXO7_ENST00000266087	0.353448	0.586207	0.0603448	FBXO7_ENST00000266087	0.602941	0.102941	0.170732
FBXO7_ENST00000382058	FBXO7_ENST00000382058	0.383178	0.560748	0.0560748	FBXO7_ENST00000382058	0.683333	0.1	0.146341	FBXO7_ENST00000382058	0.621212	1.2766	0.0594059
FBXW2_ENST00000373926	FBXW2_ENST00000373926	0.466102	0.516949	0.0169492	FBXW2_ENST00000373926	0.901639	0.0327869	0.0363636	FBXW2_ENST00000373926	0.873016	1.07018	0.0172414
FBXW7	FBXW7	0.0264317	0.786344	0.187225	FBXW7	0.0336134	0.238095	7.08333	FBXW7	0.0271493	3.68041	0.230352
FBXW7_ENST00000281708	FBXW7_ENST00000281708	0.0303819	0.778646	0.190972	FBXW7_ENST00000281708	0.039019	0.245262	6.28571	FBXW7_ENST00000281708	0.0313339	3.51765	0.236052
FBXW7_ENST00000296555	FBXW7_ENST00000296555	0.0297505	0.785988	0.184261	FBXW7_ENST00000296555	0.037851	0.234432	6.19355	FBXW7_ENST00000296555	0.0306627	3.67265	0.225882
FBXW7_ENST00000393956	FBXW7_ENST00000393956	0.00890869	0.859688	0.131403	FBXW7_ENST00000393956	0.0103627	0.15285	14.75	FBXW7_ENST00000393956	0.00898876	6.12698	0.151282
FBXW7_ENST00000534231	FBXW7_ENST00000534231	0.0271318	0.795543	0.177326	FBXW7_ENST00000534231	0.0341048	0.222899	6.53571	FBXW7_ENST00000534231	0.0278884	3.891	0.215548
FBXW7_NM_018315_2	FBXW7_NM_018315_2	0.0359712	0.779676	0.184353	FBXW7_NM_018315_2	0.0461361	0.236448	5.125	FBXW7_NM_018315_2	0.0373134	3.53878	0.22602
FCHO2	FCHO2	0.20155	0.643411	0.155039
FCN2	FCN2	0.350746	0.58209	0.0671642	FCN2	0.602564	0.115385	0.191489
FEM1A	FEM1A	0.373913	0.573913	0.0521739	FEM1A	0.651515	0.0909091	0.139535	FEM1A	0.597222	1.34694	0.0550459
FETUB	FETUB	0.173333	0.653333	0.173333	FETUB	0.265306	0.265306	1	FETUB	0.209677	1.88462	0.209677
FGF14_ENST00000376143	FGF14_ENST00000376143	0.175439	0.815789	0.00877193
FGF3	FGF3	0.14966	0.823129	0.0272109
FGFR2	FGFR2	0.106383	0.864157	0.0294599
FGFR2_ENST00000351936	FGFR2_ENST00000351936	0.114519	0.854806	0.0306748
FGFR2_ENST00000357555	FGFR2_ENST00000357555	0.103448	0.862069	0.0344828
FGFR2_ENST00000369056	FGFR2_ENST00000369056	0.104651	0.860465	0.0348837
FGFR2_ENST00000457416	FGFR2_ENST00000457416	0.111562	0.855984	0.0324544
FGFR3	FGFR3	0.0698758	0.925466	0.00465839	FGFR3	0.0755034	0.00503356	0.0666667	FGFR3	0.0751252	12.4167	0.00468019
FGFR3_ENST00000340107	FGFR3_ENST00000340107	0.129568	0.860465	0.00996678
FH	FH	0.091954	0.862069	0.045977	FH	0.106667	0.0533333	0.5	FH	0.101266	6.25	0.0481928
FLT3	FLT3	0.101987	0.864901	0.0331126	FLT3	0.117917	0.0382848	0.324675
FOXA1	FOXA1	0.132231	0.859504	0.00826446
FOXD4	FOXD4	0.390244	0.585366	0.0243902	FOXD4	0.666667	0.0416667	0.0625	FOXD4	0.64	1.41176	0.025
FOXD4_ENST00000382500					FOXD4_ENST00000382500	0.5875	0.0375	0.0638298	FOXD4_ENST00000382500	0.566265	1.6	0.023622
FOXG1	FOXG1	0.46519	0.515823	0.0189873	FOXG1	0.90184	0.0368098	0.0408163	FOXG1	0.869822	1.06536	0.0193548
FOXI1	FOXI1	0.380952	0.583333	0.0357143	FOXI1	0.653061	0.0612245	0.09375	FOXI1	0.615385	1.4	0.037037
FOXL2	FOXL2	0.0783582	0.914179	0.00746269	FOXL2	0.0857143	0.00816327	0.0952381	FOXL2	0.0850202	10.6522	0.0075188
FOXP2	FOXP2	0.372014	0.580205	0.0477816	FOXP2	0.641176	0.0823529	0.12844	FOXP2	0.592391	1.38211	0.0501792
FOXP2_ENST00000393500	FOXP2_ENST00000393500	0.563758	0.402685	0.033557	FOXP2_ENST00000393500	1.4	0.0833333	0.0595238	FOXP2_ENST00000393500	1.29231	0.674157	0.0347222
FOXP2_ENST00000403559	FOXP2_ENST00000403559	0.389961	0.563707	0.046332	FOXP2_ENST00000403559	0.691781	0.0821918	0.118812	FOXP2_ENST00000403559	0.639241	1.29204	0.048583
FRYL_ENST00000537810	FRYL_ENST00000537810	0.139896	0.818653	0.0414508
FUBP1_ENST00000370767	FUBP1_ENST00000370767	0.130802	0.64557	0.223629	FUBP1_ENST00000370767	0.202614	0.346405	1.70968	FUBP1_ENST00000370767	0.150485	1.82143	0.288043
FUBP1_ENST00000370768	FUBP1_ENST00000370768	0.123506	0.633466	0.243028	FUBP1_ENST00000370768	0.194969	0.383648	1.96774	FUBP1_ENST00000370768	0.140909	1.72826	0.321053
FUBP1_ENST00000436586	FUBP1_ENST00000436586	0.132231	0.644628	0.22314	FUBP1_ENST00000436586	0.205128	0.346154	1.6875	FUBP1_ENST00000436586	0.152381	1.81395	0.287234
FUBP3	FUBP3	0.204724	0.629921	0.165354	FUBP3	0.325	0.2625	0.807692
FURIN					FURIN	0.585366	0.0894309	0.152778
FUS	FUS	0.377622	0.566434	0.0559441	FUS	0.666667	0.0987654	0.148148	FUS	0.606742	1.30645	0.0592593
FUS_ENST00000254108	FUS_ENST00000254108	0.388889	0.555556	0.0555556	FUS_ENST00000254108	0.7	0.1	0.142857	FUS_ENST00000254108	0.636364	1.25	0.0588235
FUT1	FUT1	0.374194	0.6	0.0258065	FUT1	0.623656	0.0430108	0.0689655	FUT1	0.597938	1.5	0.0264901
FXR1	FXR1	0.186047	0.651163	0.162791	FXR1	0.285714	0.25	0.875
FXR2	FXR2	0.22314	0.619835	0.157025	FXR2	0.36	0.253333	0.703704
FZD2	FZD2	0.385787	0.588832	0.0253807	FZD2	0.655172	0.0431034	0.0657895	FZD2	0.628099	1.4321	0.0260417
G2E3	G2E3	0.138889	0.701389	0.159722
G3BP2	G3BP2	0.125	0.830357	0.0446429
G6PD_ENST00000393562									G6PD_ENST00000393562	0.550562	1.70588	0.0147059
GAA	GAA	0.381356	0.588983	0.029661	GAA	0.647482	0.0503597	0.0777778	GAA	0.616438	1.43299	0.0305677
GABRD	GABRD	0.380645	0.619355	0	GABRD	0.614583	0	0	GABRD	0.614583	1.62712	0
GALNTL5	GALNTL5	0.128788	0.818182	0.0530303
GAS6_ENST00000355761	GAS6_ENST00000355761	0.318182	0.571429	0.11039
GATA1_ENST00000376665	GATA1_ENST00000376665	0.122951	0.860656	0.0163934
GATA2	GATA2	0.101307	0.856209	0.0424837	GATA2	0.118321	0.0496183	0.419355
GCK_ENST00000395796	GCK_ENST00000395796	0.372222	0.611111	0.0166667	GCK_ENST00000395796	0.609091	0.0272727	0.0447761	GCK_ENST00000395796	0.59292	1.57143	0.0169492
GDF6									GDF6	0.552846	1.76812	0.00526316
GFPT2	GFPT2	0.395722	0.582888	0.0213904	GFPT2	0.678899	0.0366972	0.0540541	GFPT2	0.654867	1.39744	0.0218579
GHSR_ENST00000427970									GHSR_ENST00000427970	0.554217	1.63265	0.0238095
GIGYF2	GIGYF2	0.158065	0.658065	0.183871	GIGYF2	0.240196	0.279412	1.16327	GIGYF2	0.187739	1.92453	0.225296
GIGYF2_ENST00000409451	GIGYF2_ENST00000409451	0.158621	0.668966	0.172414	GIGYF2_ENST00000409451	0.237113	0.257732	1.08696	GIGYF2_ENST00000409451	0.188525	2.02083	0.208333
GIGYF2_ENST00000452341	GIGYF2_ENST00000452341	0.173913	0.614907	0.21118	GIGYF2_ENST00000452341	0.282828	0.343434	1.21429	GIGYF2_ENST00000452341	0.210526	1.59677	0.267717
GJA3	GJA3	0.408333	0.533333	0.0583333	GJA3	0.765625	0.109375	0.142857	GJA3	0.690141	1.14286	0.0619469
GJA8	GJA8	0.388278	0.589744	0.021978	GJA8	0.658385	0.0372671	0.0566038	GJA8	0.634731	1.4375	0.0224719
GJB4	GJB4	0.405405	0.585586	0.00900901	GJB4	0.692308	0.0153846	0.0222222	GJB4	0.681818	1.41304	0.00909091
GLT6D1					GLT6D1	0.585366	0.0731707	0.125
GLTSCR1	GLTSCR1	0.221239	0.634218	0.144543
GNA11	GNA11	0.134021	0.841924	0.024055
GNAQ	GNAQ	0.125424	0.823729	0.0508475
GNAS	GNAS	0.0345304	0.94337	0.0220994	GNAS	0.0366032	0.0234261	0.64	GNAS	0.0357654	16.6585	0.0225989
GNAS_ENST00000371100	GNAS_ENST00000371100	0.132075	0.843666	0.0242588
GNE	GNE	0.137681	0.826087	0.0362319
GNE_ENST00000396594	GNE_ENST00000396594	0.140741	0.82963	0.0296296
GP1BA	GP1BA	0.359155	0.577465	0.0633803	GP1BA	0.621951	0.109756	0.176471	GP1BA	0.56044	1.36667	0.0676692
GP5	GP5	0.432432	0.535135	0.0324324	GP5	0.808081	0.0606061	0.075	GP5	0.761905	1.15116	0.0335196
GP5_ENST00000323007	GP5_ENST00000323007	0.424084	0.544503	0.0314136	GP5_ENST00000323007	0.778846	0.0576923	0.0740741	GP5_ENST00000323007	0.736364	1.1954	0.0324324
GPR108	GPR108	0.388889	0.563492	0.047619	GPR108	0.690141	0.084507	0.122449	GPR108	0.636364	1.29091	0.05
GPR152	GPR152	0.348485	0.55303	0.0984848	GPR152	0.630137	0.178082	0.282609
GPR26	GPR26	0.371622	0.587838	0.0405405	GPR26	0.632184	0.0689655	0.109091	GPR26	0.591398	1.42623	0.0422535
GPR31	GPR31	0.42	0.58	0	GPR31	0.724138	0	0	GPR31	0.724138	1.38095	0
GPR77	GPR77	0.385246	0.598361	0.0163934	GPR77	0.643836	0.0273973	0.0425532	GPR77	0.626667	1.4898	0.0166667
GPR97					GPR97	0.59375	0.0416667	0.0701754	GPR97	0.57	1.57377	0.0261438
GPSM2	GPSM2	0.112069	0.801724	0.0862069
GRB14	GRB14	0.190476	0.654762	0.154762
GRK4_ENST00000398052	GRK4_ENST00000398052	0.210526	0.62406	0.165414	GRK4_ENST00000398052	0.337349	0.26506	0.785714
GRLF1	GRLF1	0.173797	0.673797	0.152406
GRLF1_ENST00000317082	GRLF1_ENST00000317082	0.174242	0.669192	0.156566
GRM6	GRM6	0.375	0.580882	0.0441176	GRM6	0.64557	0.0759494	0.117647	GRM6	0.6	1.38596	0.0461538
GRPR	GRPR	0.405594	0.58042	0.013986	GRPR	0.698795	0.0240964	0.0344828	GRPR	0.682353	1.38333	0.0141844
GSDMB	GSDMB	0.359223	0.563107	0.0776699	GSDMB	0.637931	0.137931	0.216216	GSDMB	0.560606	1.28889	0.0842105
GSDMB_ENST00000418519	GSDMB_ENST00000418519	0.35514	0.570093	0.0747664	GSDMB_ENST00000418519	0.622951	0.131148	0.210526	GSDMB_ENST00000418519	0.550725	1.32609	0.0808081
GSK3B_ENST00000316626	GSK3B_ENST00000316626	0.100629	0.767296	0.132075
GTF2E1	GTF2E1	0.144144	0.828829	0.027027
GTPBP5	GTPBP5	0.40367	0.568807	0.0275229	GTPBP5	0.709677	0.0483871	0.0681818	GTPBP5	0.676923	1.31915	0.0283019
GUF1	GUF1	0.226277	0.591241	0.182482	GUF1	0.382716	0.308642	0.806452	GUF1	0.292453	1.44643	0.223214
H3F3A	H3F3A	0.0264151	0.969811	0.00377358	H3F3A	0.0272374	0.00389105	0.142857	H3F3A	0.0271318	32.125	0.00378788
HAPLN3									HAPLN3	0.552239	1.81081	0
HAPLN4	HAPLN4	0.408163	0.544218	0.047619	HAPLN4	0.75	0.0875	0.116667	HAPLN4	0.689655	1.19403	0.05
HCRTR1	HCRTR1	0.387931	0.577586	0.0344828	HCRTR1	0.671642	0.0597015	0.0888889	HCRTR1	0.633803	1.36735	0.0357143
HELLS	HELLS	0.187879	0.660606	0.151515
HIAT1	HIAT1	0.1875	0.625	0.1875	HIAT1	0.3	0.3	1	HIAT1	0.230769	1.66667	0.230769
HIC1									HIC1	0.5625	1.77778	0
HIC1_ENST00000322941	HIC1_ENST00000322941	0.365079	0.634921	0					HIC1_ENST00000322941	0.575	1.73913	0
HIST1H3B	HIST1H3B	0.114894	0.859574	0.0255319
HKR1_ENST00000392153	HKR1_ENST00000392153	0.336283	0.584071	0.079646
HLA-A	HLA-A	0.112903	0.55914	0.327957	HLA-A	0.201923	0.586538	2.90476	HLA-A	0.127273	1.26829	0.488
HLA-A_ENST00000376806	HLA-A_ENST00000376806	0.0890411	0.630137	0.280822	HLA-A_ENST00000376806	0.141304	0.445652	3.15385	HLA-A_ENST00000376806	0.0977444	1.7037	0.390476
HLA-B	HLA-B	0.117647	0.661765	0.220588	HLA-B	0.177778	0.333333	1.875	HLA-B	0.133333	1.95652	0.283019
HMGXB4	HMGXB4	0.190476	0.666667	0.142857
HMMR	HMMR	0.174497	0.637584	0.187919	HMMR	0.273684	0.294737	1.07692	HMMR	0.211382	1.75926	0.231405
HNF1A	HNF1A	0.117391	0.686957	0.195652	HNF1A	0.170886	0.28481	1.66667	HNF1A	0.133005	2.19444	0.243243
HNF1A_ENST00000543427	HNF1A_ENST00000543427	0.10582	0.825397	0.0687831
HNRNPA2B1	HNRNPA2B1	0.0964912	0.807018	0.0964912
HNRNPA2B1_ENST00000354667	HNRNPA2B1_ENST00000354667	0.0964912	0.807018	0.0964912
HNRNPK	HNRNPK	0.125	0.841667	0.0333333
HNRNPL	HNRNPL	0.210526	0.592105	0.197368	HNRNPL	0.355556	0.333333	0.9375	HNRNPL	0.266667	1.45161	0.245902
HNRNPR	HNRNPR	0.395522	0.589552	0.0149254	HNRNPR	0.670886	0.0253165	0.0377358	HNRNPR	0.654321	1.43636	0.0151515
HNRPL	HNRPL	0.191176	0.588235	0.220588	HNRPL	0.325	0.375	1.15385	HNRPL	0.236364	1.42857	0.283019
HNRPR	HNRPR	0.395522	0.589552	0.0149254	HNRPR	0.670886	0.0253165	0.0377358	HNRPR	0.654321	1.43636	0.0151515
HOMEZ	HOMEZ	0.144231	0.817308	0.0384615
HOXA11	HOXA11	0.385321	0.504587	0.110092	HOXA11	0.763636	0.218182	0.285714	HOXA11	0.626866	1.01852	0.123711
HOXB3	HOXB3	0.352941	0.541176	0.105882	HOXB3	0.652174	0.195652	0.3
HOXD10	HOXD10	0.531792	0.445087	0.0231214	HOXD10	1.19481	0.0519481	0.0434783	HOXD10	1.1358	0.802083	0.0236686
HOXD12	HOXD12	0.330189	0.584906	0.0849057
HOXD3	HOXD3	0.393548	0.567742	0.0387097	HOXD3	0.693182	0.0681818	0.0983607	HOXD3	0.648936	1.31343	0.0402685
HPS6	HPS6	0.226087	0.608696	0.165217	HPS6	0.371429	0.271429	0.730769
HRAS	HRAS	0.0149051	0.97832	0.00677507	HRAS	0.0152355	0.00692521	0.454545	HRAS	0.0151307	45.125	0.00682128
HRAS_ENST00000397594	HRAS_ENST00000397594	0.0243243	0.959459	0.0162162	HRAS_ENST00000397594	0.0253521	0.0169014	0.666667	HRAS_ENST00000397594	0.0249307	23.6667	0.0164835
HS3ST3A1	HS3ST3A1	0.380531	0.610619	0.00884956	HS3ST3A1	0.623188	0.0144928	0.0232558	HS3ST3A1	0.614286	1.56818	0.00892857
HSD3B1	HSD3B1	0.36	0.584	0.056	HSD3B1	0.616438	0.0958904	0.155556	HSD3B1	0.5625	1.40385	0.059322
HSPA2	HSPA2	0.375635	0.588832	0.035533	HSPA2	0.637931	0.0603448	0.0945946	HSPA2	0.601626	1.4321	0.0368421
HTR1F	HTR1F	0.211864	0.644068	0.144068
ICA1	ICA1	0.213415	0.634146	0.152439
IDH1	IDH1	0.00729927	0.985923	0.00677789	IDH1	0.00740349	0.00687467	0.928571	IDH1	0.00735294	70.037	0.00682415
IDH2	IDH2	0.0414634	0.921951	0.0365854	IDH2	0.0449735	0.0396825	0.882353	IDH2	0.043257	11.8125	0.0379747
IDH3B	IDH3B	0.135922	0.84466	0.0194175
IFT57	IFT57	0.190476	0.638095	0.171429	IFT57	0.298507	0.268657	0.9	IFT57	0.235294	1.76316	0.206897
IGF1_ENST00000307046	IGF1_ENST00000307046	0.122951	0.844262	0.0327869
IGF2BP2_ENST00000421047									IGF2BP2_ENST00000421047	0.554217	1.63265	0.0238095
IGSF21	IGSF21	0.384615	0.588235	0.0271493	IGSF21	0.653846	0.0461538	0.0705882	IGSF21	0.625	1.42857	0.027907
IL12RB1	IL12RB1	0.366071	0.544643	0.0892857	IL12RB1	0.672131	0.163934	0.243902	IL12RB1	0.577465	1.19608	0.0980392
IL12RB1_ENST00000430026	IL12RB1_ENST00000430026	0.358586	0.575758	0.0656566	IL12RB1_ENST00000430026	0.622807	0.114035	0.183099	IL12RB1_ENST00000430026	0.559055	1.35714	0.0702703
IL12RB1_ENST00000593993	IL12RB1_ENST00000593993	0.361257	0.570681	0.0680628	IL12RB1_ENST00000593993	0.633028	0.119266	0.188406	IL12RB1_ENST00000593993	0.565574	1.32927	0.0730337
IL2RG	IL2RG	0.238532	0.614679	0.146789
IL2RG_ENST00000374202	IL2RG_ENST00000374202	0.238532	0.614679	0.146789
IMP5	IMP5	0.384146	0.609756	0.00609756	IMP5	0.63	0.01	0.015873	IMP5	0.623762	1.5625	0.00613497
ING1	ING1	0.206349	0.626984	0.166667	ING1	0.329114	0.265823	0.807692
ING1_ENST00000338450	ING1_ENST00000338450	0.2	0.617391	0.182609	ING1_ENST00000338450	0.323944	0.295775	0.913043	ING1_ENST00000338450	0.25	1.61364	0.223404
IRF2BPL	IRF2BPL	0.366667	0.613333	0.02	IRF2BPL	0.597826	0.0326087	0.0545455	IRF2BPL	0.578947	1.58621	0.0204082
IRF3	IRF3	0.4	0.554545	0.0454545	IRF3	0.721311	0.0819672	0.113636	IRF3	0.666667	1.2449	0.047619
IRF4_ENST00000380956	IRF4_ENST00000380956	0.130303	0.815152	0.0545455
IRGQ	IRGQ	0.373016	0.571429	0.0555556	IRGQ	0.652778	0.0972222	0.148936	IRGQ	0.594937	1.33333	0.0588235
IRS2	IRS2	0.137681	0.852657	0.00966184
ITFG3_ENST00000450082					ITFG3_ENST00000450082	0.594937	0.0506329	0.0851064	ITFG3_ENST00000450082	0.566265	1.54902	0.031746
ITGA11	ITGA11	0.394904	0.566879	0.0382166	ITGA11	0.696629	0.0674157	0.0967742	ITGA11	0.652632	1.30882	0.0397351
ITGBL1	ITGBL1	0.128866	0.845361	0.0257732
ITPRIP	ITPRIP	0.377483	0.602649	0.0198675	ITPRIP	0.626374	0.032967	0.0526316	ITPRIP	0.606383	1.51667	0.0202703
IWS1	IWS1	0.152174	0.630435	0.217391	IWS1	0.241379	0.344828	1.42857	IWS1	0.179487	1.70588	0.277778
JAK1	JAK1	0.09375	0.737847	0.168403					JAK1	0.103448	2.81457	0.202505
JAK2	JAK2	0.0290851	0.94606	0.0248546	JAK2	0.0307434	0.0262717	0.854545	JAK2	0.0299564	17.5392	0.0254881
JAK3_ENST00000534444	JAK3_ENST00000534444	0.0658436	0.868313	0.0658436	JAK3_ENST00000534444	0.0758294	0.0758294	1	JAK3_ENST00000534444	0.0704846	6.59375	0.0704846
JPH4	JPH4	0.256831	0.590164	0.153005	JPH4	0.435185	0.259259	0.595745
KAT8	KAT8	0.168067	0.815126	0.0168067
KBTBD4	KBTBD4	0.173554	0.669421	0.157025
KCNC1	KCNC1	0.408257	0.573394	0.0183486	KCNC1	0.712	0.032	0.0449438	KCNC1	0.689922	1.34409	0.0186916
KCNC1_ENST00000265969	KCNC1_ENST00000265969	0.405286	0.585903	0.00881057	KCNC1_ENST00000265969	0.691729	0.0150376	0.0217391	KCNC1_ENST00000265969	0.681481	1.41489	0.00888889
KCNG1_ENST00000396017	KCNG1_ENST00000396017	0.387755	0.585034	0.0272109	KCNG1_ENST00000396017	0.662791	0.0465116	0.0701754	KCNG1_ENST00000396017	0.633333	1.40984	0.027972
KCNG4	KCNG4	0.398104	0.554502	0.0473934	KCNG4	0.717949	0.0854701	0.119048	KCNG4	0.661417	1.24468	0.0497512
KCNJ11	KCNJ11	0.387387	0.585586	0.027027	KCNJ11	0.661538	0.0461538	0.0697674	KCNJ11	0.632353	1.41304	0.0277778
KCNJ5	KCNJ5	0.0719424	0.917986	0.0100719	KCNJ5	0.0783699	0.0109718	0.14	KCNJ5	0.0775194	11.193	0.0101744
KCNK1	KCNK1	0.340741	0.577778	0.0814815	KCNK1	0.589744	0.141026	0.23913
KCNK3	KCNK3	0.384615	0.589744	0.025641	KCNK3	0.652174	0.0434783	0.0666667	KCNK3	0.625	1.4375	0.0263158
KCNN2	KCNN2	0.372807	0.578947	0.0482456	KCNN2	0.643939	0.0833333	0.129412	KCNN2	0.594406	1.375	0.0506912
KCNN2_ENST00000512097	KCNN2_ENST00000512097	0.409091	0.539773	0.0511364	KCNN2_ENST00000512097	0.757895	0.0947368	0.125	KCNN2_ENST00000512097	0.692308	1.17284	0.0538922
KCNN4	KCNN4	0.378378	0.585586	0.036036	KCNN4	0.646154	0.0615385	0.0952381	KCNN4	0.608696	1.41304	0.0373832
KCNQ1	KCNQ1	0.346821	0.566474	0.0867052	KCNQ1	0.612245	0.153061	0.25
KCNQ1_ENST00000335475	KCNQ1_ENST00000335475	0.365517	0.551724	0.0827586	KCNQ1_ENST00000335475	0.6625	0.15	0.226415	KCNQ1_ENST00000335475	0.576087	1.23077	0.0902256
KCTD3	KCTD3	0.147959	0.668367	0.183673	KCTD3	0.221374	0.274809	1.24138	KCTD3	0.173653	2.01538	0.225
KDM5A	KDM5A	0.0971731	0.787986	0.114841
KDM5A_ENST00000399788	KDM5A_ENST00000399788	0.0971731	0.787986	0.114841
KDM5C	KDM5C	0.116751	0.729272	0.153976
KDM5C_ENST00000452825	KDM5C_ENST00000452825	0.118998	0.734864	0.146138
KDM6A	KDM6A	0.125313	0.575188	0.299499	KDM6A	0.217865	0.520697	2.39	KDM6A	0.143266	1.35398	0.427549
KDM6A_ENST00000377967	KDM6A_ENST00000377967	0.148148	0.591168	0.260684	KDM6A_ENST00000377967	0.250602	0.440964	1.75962	KDM6A_ENST00000377967	0.173913	1.44599	0.352601
KDM6A_ENST00000382899	KDM6A_ENST00000382899	0.151079	0.58705	0.261871	KDM6A_ENST00000382899	0.257353	0.446078	1.73333	KDM6A_ENST00000382899	0.177966	1.4216	0.354776
KEAP1	KEAP1	0.0790274	0.834347	0.0866261	KEAP1	0.0947177	0.103825	1.09615	KEAP1	0.0858086	5.0367	0.0948419
KIAA1267	KIAA1267	0.19573	0.651246	0.153025
KIAA1586	KIAA1586	0.210084	0.647059	0.142857
KIAA1731_ENST00000411936	KIAA1731_ENST00000411936	0.110092	0.793578	0.0963303
KIR3DL1_ENST00000402254									KIR3DL1_ENST00000402254	0.553571	1.63636	0.0235294
KIT	KIT	0.0976959	0.882028	0.0202765	KIT	0.110763	0.0229885	0.207547
KLF3	KLF3	0.189189	0.63964	0.171171	KLF3	0.295775	0.267606	0.904762	KLF3	0.233333	1.775	0.206522
KLF4	KLF4	0.133641	0.857143	0.00921659
KLHDC5	KLHDC5	0.253846	0.592308	0.153846	KLHDC5	0.428571	0.25974	0.606061
KLHDC8A	KLHDC8A	0.376	0.584	0.04	KLHDC8A	0.643836	0.0684932	0.106383	KLHDC8A	0.602564	1.40385	0.0416667
KLHL14_ENST00000358095	KLHL14_ENST00000358095	0.365517	0.544828	0.0896552	KLHL14_ENST00000358095	0.670886	0.164557	0.245283	KLHL14_ENST00000358095	0.576087	1.19697	0.0984848
KLHL23	KLHL23	0.09	0.89	0.02	KLHL23	0.101124	0.0224719	0.222222	KLHL23	0.0989011	8.09091	0.0204082
KLHL5	KLHL5	0.121387	0.820809	0.0578035
KLHL5_ENST00000359687	KLHL5_ENST00000359687	0.118421	0.855263	0.0263158
KLHL5_ENST00000381930	KLHL5_ENST00000381930	0.121622	0.851351	0.027027
KLHL7	KLHL7	0.125	0.825	0.05
KLK15	KLK15	0.166667	0.819444	0.0138889
KMO	KMO	0.130137	0.828767	0.0410959
KMT2C	KMT2C	0.10852	0.672646	0.218834	KMT2C	0.161333	0.325333	2.01653	KMT2C	0.12173	2.05479	0.280138
KMT2D	KMT2D	0.107855	0.632278	0.259867	KMT2D	0.170581	0.411001	2.40942	KMT2D	0.120894	1.71945	0.351109
KPNA5	KPNA5	0.132231	0.826446	0.0413223
KRAS	KRAS	0.00384543	0.995404	0.000750328	KRAS	0.00386319	0.000753793	0.195122	KRAS	0.00386028	216.592	0.000750892
KRAS_ENST00000256078	KRAS_ENST00000256078	0.00743187	0.991536	0.0010322	KRAS_ENST00000256078	0.00749532	0.00104102	0.138889	KRAS_ENST00000256078	0.00748752	117.146	0.00103327
KRT15	KRT15	0.36612	0.595628	0.0382514	KRT15	0.614679	0.0642202	0.104478	KRT15	0.577586	1.47297	0.0397727
KRT82	KRT82	0.375	0.583333	0.0416667	KRT82	0.642857	0.0714286	0.111111	KRT82	0.6	1.4	0.0434783
KRT85	KRT85	0.378698	0.597633	0.0236686	KRT85	0.633663	0.039604	0.0625	KRT85	0.609524	1.48529	0.0242424
KRTAP27-1					KRTAP27-1	0.590164	0.0655738	0.111111	KRTAP27-1	0.553846	1.525	0.0412371
KRTAP5-4	KRTAP5-4	0.42623	0.565574	0.00819672	KRTAP5-4	0.753623	0.0144928	0.0192308	KRTAP5-4	0.742857	1.30189	0.00826446
LARGE_ENST00000452586	LARGE_ENST00000452586	0.168224	0.831776	0
LARP4B	LARP4B	0.169565	0.543478	0.286957	LARP4B	0.312	0.528	1.69231	LARP4B	0.204188	1.19048	0.402439
LARP7	LARP7	0.163934	0.614754	0.221311	LARP7	0.266667	0.36	1.35	LARP7	0.196078	1.59574	0.284211
LATS1_ENST00000253339	LATS1_ENST00000253339	0.0775862	0.767241	0.155172	LATS1_ENST00000253339	0.101124	0.202247	2	LATS1_ENST00000253339	0.0841121	3.2963	0.183673
LATS1_ENST00000392273	LATS1_ENST00000392273	0.0877863	0.748092	0.164122	LATS1_ENST00000392273	0.117347	0.219388	1.86957	LATS1_ENST00000392273	0.0962343	2.9697	0.196347
LATS1_ENST00000543571	LATS1_ENST00000543571	0.0792952	0.759912	0.160793	LATS1_ENST00000543571	0.104348	0.211594	2.02778	LATS1_ENST00000543571	0.0861244	3.16514	0.191601
LCOR	LCOR	0.432	0.52	0.048	LCOR	0.830769	0.0923077	0.111111	LCOR	0.760563	1.08333	0.0504202
LGR6_ENST00000255432					LGR6_ENST00000255432	0.610169	0.0847458	0.138889	LGR6_ENST00000255432	0.5625	1.43902	0.0526316
LGR6_ENST00000439764	LGR6_ENST00000439764	0.365385	0.570513	0.0641026	LGR6_ENST00000439764	0.640449	0.11236	0.175439	LGR6_ENST00000439764	0.575758	1.32836	0.0684932
LHFPL3	LHFPL3	0.424779	0.522124	0.0530973	LHFPL3	0.813559	0.101695	0.125	LHFPL3	0.738462	1.09259	0.0560748
LHFPL3_ENST00000543266	LHFPL3_ENST00000543266	0.419048	0.542857	0.0380952	LHFPL3_ENST00000543266	0.77193	0.0701754	0.0909091	LHFPL3_ENST00000543266	0.721311	1.1875	0.039604
LHFPL5	LHFPL5	0.38835	0.592233	0.0194175	LHFPL5	0.655738	0.0327869	0.05	LHFPL5	0.634921	1.45238	0.019802
LIN54					LIN54	0.603175	0.0714286	0.118421	LIN54	0.562963	1.48235	0.0445545
LINC00273	LINC00273	0.437956	0.547445	0.0145985	LINC00273	0.8	0.0266667	0.0333333	LINC00273	0.779221	1.20968	0.0148148
LINC00273_ENST00000539813	LINC00273_ENST00000539813	0.437956	0.547445	0.0145985	LINC00273_ENST00000539813	0.8	0.0266667	0.0333333	LINC00273_ENST00000539813	0.779221	1.20968	0.0148148
LMAN1	LMAN1	0.15	0.55	0.3	LMAN1	0.272727	0.545455	2	LMAN1	0.176471	1.22222	0.428571
LMX1B	LMX1B	0.385185	0.577778	0.037037	LMX1B	0.666667	0.0641026	0.0961538	LMX1B	0.626506	1.36842	0.0384615
LMX1B_ENST00000355497	LMX1B_ENST00000355497	0.382353	0.580882	0.0367647	LMX1B_ENST00000355497	0.658228	0.0632911	0.0961538	LMX1B_ENST00000355497	0.619048	1.38596	0.0381679
LMX1B_ENST00000373474	LMX1B_ENST00000373474	0.375	0.59375	0.03125	LMX1B_ENST00000373474	0.631579	0.0526316	0.0833333	LMX1B_ENST00000373474	0.6	1.46154	0.0322581
LRRC14B	LRRC14B	0.352459	0.581967	0.0655738	LRRC14B	0.605634	0.112676	0.186047
LRRC33	LRRC33	0.367925	0.608491	0.0235849	LRRC33	0.604651	0.0387597	0.0641026	LRRC33	0.58209	1.55422	0.0241546
LRRC52	LRRC52	0.344828	0.586207	0.0689655	LRRC52	0.588235	0.117647	0.2
LRRC8A	LRRC8A	0.406091	0.563452	0.0304569	LRRC8A	0.720721	0.0540541	0.075	LRRC8A	0.683761	1.2907	0.0314136
LRRD1	LRRD1	0.08	0.81	0.11	LRRD1	0.0987654	0.135802	1.375	LRRD1	0.0869565	4.26316	0.123596
LRRTM2	LRRTM2	0.4	0.55	0.05	LRRTM2	0.727273	0.0909091	0.125	LRRTM2	0.666667	1.22222	0.0526316
LUC7L2	LUC7L2	0.106195	0.716814	0.176991	LUC7L2	0.148148	0.246914	1.66667	LUC7L2	0.118812	2.53125	0.215054
LUC7L2_ENST00000263545	LUC7L2_ENST00000263545	0.0980392	0.745098	0.156863
LUC7L2_ENST00000541170	LUC7L2_ENST00000541170	0.106796	0.718447	0.174757					LUC7L2_ENST00000541170	0.119565	2.55172	0.211765
LUM	LUM	0.151261	0.815126	0.0336134
LUZP4	LUZP4	0.0948276	0.818966	0.0862069	LUZP4	0.115789	0.105263	0.909091
MAML2					MAML2	0.59375	0.075	0.126316	MAML2	0.552326	1.49533	0.0470588
MAN1A2	MAN1A2	0.204545	0.628788	0.166667	MAN1A2	0.325301	0.26506	0.814815
MANEA	MANEA	0.0952381	0.828571	0.0761905	MANEA	0.114943	0.091954	0.8
MAP2K1	MAP2K1	0.0772059	0.900735	0.0220588	MAP2K1	0.0857143	0.0244898	0.285714	MAP2K1	0.0836653	9.07407	0.0225564
MAP2K4	MAP2K4	0.0795107	0.737003	0.183486	MAP2K4	0.107884	0.248963	2.30769	MAP2K4	0.0863787	2.80233	0.224719
MAP3K1_ENST00000399503	MAP3K1_ENST00000399503	0.0919118	0.711397	0.196691	MAP3K1_ENST00000399503	0.129199	0.276486	2.14	MAP3K1_ENST00000399503	0.101215	2.46497	0.244851
MAP4_ENST00000395734	MAP4_ENST00000395734	0.331683	0.584158	0.0841584
MAP4K1_ENST00000396857					MAP4K1_ENST00000396857	0.604839	0.0725806	0.12	MAP4K1_ENST00000396857	0.56391	1.47619	0.0452261
MAP7D1	MAP7D1	0.168317	0.673267	0.158416
MAPK1	MAPK1	0.136986	0.835616	0.0273973
MAPK13	MAPK13	0.407767	0.572816	0.0194175	MAPK13	0.711864	0.0338983	0.047619	MAPK13	0.688525	1.34091	0.019802
MAPK9_ENST00000452135	MAPK9_ENST00000452135	0.148515	0.821782	0.029703
MARCH7	MARCH7	0.112	0.792	0.096
MATR3	MATR3	0.421488	0.541322	0.0371901	MATR3	0.778626	0.0687023	0.0882353	MATR3	0.728571	1.18018	0.0386266
MAX	MAX	0.0567376	0.815603	0.12766	MAX	0.0695652	0.156522	2.25	MAX	0.0601504	4.42308	0.146341
MAX_ENST00000284165	MAX_ENST00000284165	0.0263158	0.850877	0.122807	MAX_ENST00000284165	0.0309278	0.14433	4.66667	MAX_ENST00000284165	0.027027	5.70588	0.14
MAX_ENST00000556979	MAX_ENST00000556979	0.0186916	0.850467	0.130841	MAX_ENST00000556979	0.021978	0.153846	7	MAX_ENST00000556979	0.0190476	5.6875	0.150538
MBD6	MBD6	0.196653	0.58159	0.221757	MBD6	0.338129	0.381295	1.12766	MBD6	0.244792	1.39	0.284946
MCHR2	MCHR2	0.295455	0.563636	0.140909	MCHR2	0.524194	0.25	0.476923
MCHR2_ENST00000369212	MCHR2_ENST00000369212	0.35	0.585	0.065	MCHR2_ENST00000369212	0.598291	0.111111	0.185714
MCMDC2	MCMDC2	0.111111	0.826389	0.0625
MCMDC2_ENST00000313616	MCMDC2_ENST00000313616	0.12	0.824	0.056
MCMDC2_ENST00000422365	MCMDC2_ENST00000422365	0.111111	0.826389	0.0625
MCPH1_ENST00000344683	MCPH1_ENST00000344683	0.234375	0.59375	0.171875	MCPH1_ENST00000344683	0.394737	0.289474	0.733333	MCPH1_ENST00000344683	0.306122	1.46154	0.207547
MDM2	MDM2	0.0924855	0.83815	0.0693642	MDM2	0.110345	0.0827586	0.75	MDM2	0.101911	5.17857	0.0745342
MDM2_ENST00000462284	MDM2_ENST00000462284	0.0981595	0.828221	0.0736196	MDM2_ENST00000462284	0.118519	0.0888889	0.75
MDM4	MDM4	0.125786	0.823899	0.0503145
MED12	MED12	0.0510843	0.924819	0.0240964	MED12	0.0552371	0.0260552	0.471698	MED12	0.0538344	12.3013	0.0246914
MED12_ENST00000333646	MED12_ENST00000333646	0.0917108	0.850088	0.0582011	MED12_ENST00000333646	0.107884	0.0684647	0.634615	MED12_ENST00000333646	0.100971	5.67059	0.0617978
MED12_ENST00000374080	MED12_ENST00000374080	0.121284	0.820452	0.058264
MEN1	MEN1	0.0973451	0.564159	0.338496	MEN1	0.172549	0.6	3.47727	MEN1	0.107843	1.29442	0.511706
MESP2	MESP2	0.391304	0.565217	0.0434783	MESP2	0.692308	0.0769231	0.111111	MESP2	0.642857	1.3	0.0454545
MFAP3L	MFAP3L	0.417323	0.566929	0.015748	MFAP3L	0.736111	0.0277778	0.0377358	MFAP3L	0.716216	1.30909	0.016
MFRP	MFRP	0.246575	0.59589	0.157534	MFRP	0.413793	0.264368	0.638889
MGA	MGA	0.13565	0.669283	0.195067	MGA	0.20268	0.291457	1.43802	MGA	0.156939	2.02373	0.24234
MGAT4C_ENST00000393205	MGAT4C_ENST00000393205	0.148649	0.824324	0.027027
MIS18BP1	MIS18BP1	0.136752	0.700855	0.162393
MLH1	MLH1	0.121581	0.644377	0.234043	MLH1	0.188679	0.363208	1.925	MLH1	0.138408	1.81197	0.305556
MLL2_ENST00000301067	MLL2_ENST00000301067	0.115958	0.629008	0.255034	MLL2_ENST00000301067	0.184351	0.405453	2.19936	MLL2_ENST00000301067	0.131168	1.69548	0.342342
MLL3_ENST00000355193	MLL3_ENST00000355193	0.109795	0.676082	0.214123	MLL3_ENST00000355193	0.162399	0.316712	1.95021	MLL3_ENST00000355193	0.123337	2.0872	0.272464
MLL4	MLL4	0.204268	0.63872	0.157012	MLL4	0.319809	0.245823	0.768657
MLLT3	MLLT3	0.610909	0.345455	0.0436364	MLLT3	1.76842	0.126316	0.0714286	MLLT3	1.57009	0.527778	0.0456274
MMP13	MMP13	0.165644	0.822086	0.0122699
MMP14	MMP14	0.408759	0.576642	0.0145985	MMP14	0.708861	0.0253165	0.0357143	MMP14	0.691358	1.36207	0.0148148
MOS	MOS	0.365385	0.602564	0.0320513	MOS	0.606383	0.0531915	0.0877193	MOS	0.575758	1.51613	0.0331126
MPL	MPL	0.121212	0.828283	0.0505051
MRE11A	MRE11A	0.120623	0.723735	0.155642
MRE11A_ENST00000323929	MRE11A_ENST00000323929	0.114504	0.729008	0.156489
MRGPRX1	MRGPRX1	0.388	0.588	0.024	MRGPRX1	0.659864	0.0408163	0.0618557	MRGPRX1	0.633987	1.42718	0.0245902
MSH2	MSH2	0.118919	0.62973	0.251351	MSH2	0.188841	0.399142	2.11364	MSH2	0.134969	1.70073	0.33574
MSH3	MSH3	0.202479	0.599174	0.198347	MSH3	0.337931	0.331034	0.979592	MSH3	0.253886	1.49485	0.247423
MSH3_ENST00000265081	MSH3_ENST00000265081	0.209607	0.593886	0.196507	MSH3_ENST00000265081	0.352941	0.330882	0.9375	MSH3_ENST00000265081	0.265193	1.46237	0.244565
MSH6	MSH6	0.0924214	0.639556	0.268022	MSH6	0.144509	0.419075	2.9	MSH6	0.101833	1.77436	0.366162
MSI1									MSI1	0.552239	1.66667	0.0196078
MSL2	MSL2	0.422819	0.503356	0.0738255	MSL2	0.84	0.146667	0.174603	MSL2	0.732558	1.01351	0.0797101
MSL3_ENST00000398527	MSL3_ENST00000398527	0.134615	0.817308	0.0480769
MSN	MSN	0.369318	0.573864	0.0568182	MSN	0.643564	0.0990099	0.153846	MSN	0.585586	1.34667	0.060241
MTF2	MTF2	0.116071	0.705357	0.178571	MTF2	0.164557	0.253165	1.53846	MTF2	0.131313	2.39394	0.217391
MTMR2	MTMR2	0.23301	0.61165	0.15534	MTMR2	0.380952	0.253968	0.666667
MTMR2_ENST00000346299	MTMR2_ENST00000346299	0.238938	0.60177	0.159292	MTMR2_ENST00000346299	0.397059	0.264706	0.666667
MTNR1A	MTNR1A	0.438356	0.527397	0.0342466	MTNR1A	0.831169	0.0649351	0.078125	MTNR1A	0.780488	1.11594	0.035461
MTOR	MTOR	0.132743	0.821239	0.0460177
MVK	MVK	0.206612	0.504132	0.289256	MVK	0.409836	0.57377	1.4	MVK	0.260417	1.01667	0.406977
MXRA8	MXRA8	0.18254	0.52381	0.293651	MXRA8	0.348485	0.560606	1.6087	MXRA8	0.223301	1.1	0.41573
MYADM	MYADM	0.397059	0.602941	0	MYADM	0.658537	0	0	MYADM	0.658537	1.51852	0
MYC	MYC	0.158576	0.822006	0.0194175
MYC_ENST00000377970	MYC_ENST00000377970	0.16	0.821538	0.0184615
MYCL1_ENST00000397332	MYCL1_ENST00000397332	0.109091	0.818182	0.0727273
MYCN	MYCN	0.0890411	0.869863	0.0410959	MYCN	0.102362	0.0472441	0.461538	MYCN	0.0977444	6.68421	0.0428571
MYD88	MYD88	0.0309524	0.954762	0.0142857	MYD88	0.032419	0.0149626	0.461538	MYD88	0.031941	21.1053	0.0144928
MYD88_ENST00000417037	MYD88_ENST00000417037	0.0992366	0.854962	0.0458015	MYD88_ENST00000417037	0.116071	0.0535714	0.461538
N4BP2L2	N4BP2L2	0.135922	0.834951	0.0291262
NAA15	NAA15	0.115646	0.727891	0.156463
NAA35	NAA35	0.102564	0.794872	0.102564
NARFL	NARFL	0.412281	0.526316	0.0614035	NARFL	0.783333	0.116667	0.148936	NARFL	0.701493	1.11111	0.0654206
NBN	NBN	0.0943396	0.713208	0.192453	NBN	0.132275	0.269841	2.04	NBN	0.104167	2.48684	0.238318
NCK2	NCK2	0.380282	0.591549	0.028169	NCK2	0.642857	0.047619	0.0740741	NCK2	0.613636	1.44828	0.0289855
NCK2_ENST00000233154	NCK2_ENST00000233154	0.372549	0.601307	0.0261438	NCK2_ENST00000233154	0.619565	0.0434783	0.0701754	NCK2_ENST00000233154	0.59375	1.5082	0.0268456
NCOR1	NCOR1	0.130435	0.699177	0.170388					NCOR1	0.15	2.32422	0.205382
NCOR1_ENST00000395851	NCOR1_ENST00000395851	0.132051	0.701282	0.166667
NCOR1_ENST00000436828	NCOR1_ENST00000436828	0.0542636	0.75969	0.186047	NCOR1_ENST00000436828	0.0714286	0.244898	3.42857	NCOR1_ENST00000436828	0.057377	3.16129	0.228571
NDST1									NDST1	0.563492	1.62667	0.0207254
NDUFS1	NDUFS1	0.110169	0.847458	0.0423729
NEK1_ENST00000507142	NEK1_ENST00000507142	0.171946	0.656109	0.171946	NEK1_ENST00000507142	0.262069	0.262069	1	NEK1_ENST00000507142	0.20765	1.90789	0.20765
NEUROD6	NEUROD6	0.41841	0.497908	0.083682	NEUROD6	0.840336	0.168067	0.2	NEUROD6	0.719424	0.991667	0.0913242
NF1	NF1	0.0967359	0.569139	0.334125	NF1	0.169969	0.58707	3.45399	NF1	0.107096	1.32094	0.501783
NF1_ENST00000358273	NF1_ENST00000358273	0.103616	0.609179	0.287204	NF1_ENST00000358273	0.170091	0.471461	2.77181	NF1_ENST00000358273	0.115593	1.55872	0.402927
NF1_ENST00000444181	NF1_ENST00000444181	0.0857143	0.62381	0.290476	NF1_ENST00000444181	0.137405	0.465649	3.38889	NF1_ENST00000444181	0.09375	1.65823	0.409396
NF2	NF2	0.0332829	0.301059	0.665658	NF2	0.110553	2.21106	20	NF2	0.0344288	0.430736	1.99095
NF2_ENST00000403999	NF2_ENST00000403999	0.0456026	0.511401	0.442997	NF2_ENST00000403999	0.089172	0.866242	9.71429	NF2_ENST00000403999	0.0477816	1.04667	0.795322
NFE2L1	NFE2L1	0.337079	0.55618	0.106742	NFE2L1	0.606061	0.191919	0.316667
NFE2L2	NFE2L2	0.0409836	0.934426	0.0245902	NFE2L2	0.0438596	0.0263158	0.6	NFE2L2	0.042735	14.25	0.0252101
NFIX_ENST00000360105					NFIX_ENST00000360105	0.597222	0.0972222	0.162791
NGFR	NGFR	0.374046	0.603053	0.0229008	NGFR	0.620253	0.0379747	0.0612245	NGFR	0.597561	1.51923	0.0234375
NIPBL	NIPBL	0.173077	0.679487	0.147436
NLRC3					NLRC3	0.592593	0.0634921	0.107143	NLRC3	0.557214	1.52419	0.0398671
NMT2	NMT2	0.126214	0.815534	0.0582524
NMUR2	NMUR2	0.373134	0.604478	0.0223881	NMUR2	0.617284	0.037037	0.06	NMUR2	0.595238	1.5283	0.0229008
NONO	NONO	0.102362	0.818898	0.0787402
NOSTRIN_ENST00000444448	NOSTRIN_ENST00000444448	0.196078	0.637255	0.166667	NOSTRIN_ENST00000444448	0.307692	0.261538	0.85
NOTCH1	NOTCH1	0.110157	0.744315	0.145528
NOTCH1_ENST00000277541	NOTCH1_ENST00000277541	0.114684	0.744373	0.140943
NOTCH2	NOTCH2	0.114035	0.755361	0.130604
NOTCH4	NOTCH4	0.118537	0.823455	0.0580076
NOVA1	NOVA1	0.426471	0.511765	0.0617647	NOVA1	0.833333	0.12069	0.144828	NOVA1	0.74359	1.04819	0.0658307
NOX5_ENST00000388866	NOX5_ENST00000388866	0.152174	0.818841	0.0289855
NPEPPS	NPEPPS	0.352201	0.584906	0.0628931	NPEPPS	0.602151	0.107527	0.178571
NPIPL3									NPIPL3	0.568627	1.66667	0.0126582
NPTX2	NPTX2	0.387879	0.593939	0.0181818	NPTX2	0.653061	0.0306122	0.046875	NPTX2	0.633663	1.46269	0.0185185
NRAS	NRAS	0.00759144	0.988958	0.00345066	NRAS	0.0076762	0.00348918	0.454545	NRAS	0.00764951	89.5625	0.0034626
NSUN6	NSUN6	0.147826	0.652174	0.2	NSUN6	0.226667	0.306667	1.35294	NSUN6	0.173469	1.875	0.25
NT5C2	NT5C2	0.138686	0.832117	0.0291971
NTNG2	NTNG2	0.394737	0.583333	0.0219298	NTNG2	0.676692	0.037594	0.0555556	NTNG2	0.652174	1.4	0.0224215
NTNG2_ENST00000360670	NTNG2_ENST00000360670	0.414747	0.56682	0.0184332	NTNG2_ENST00000360670	0.731707	0.0325203	0.0444444	NTNG2_ENST00000360670	0.708661	1.30851	0.0187793
NTNG2_ENST00000372179	NTNG2_ENST00000372179	0.43956	0.554945	0.00549451	NTNG2_ENST00000372179	0.792079	0.00990099	0.0125	NTNG2_ENST00000372179	0.784314	1.24691	0.00552486
NTRK2	NTRK2	0.132653	0.82398	0.0433673
NTRK2_ENST00000304053	NTRK2_ENST00000304053	0.140351	0.828947	0.0307018
NTRK2_ENST00000376214	NTRK2_ENST00000376214	0.131234	0.824147	0.0446194
NTRK2_ENST00000395882	NTRK2_ENST00000395882	0.145251	0.826816	0.027933
NUB1	NUB1	0.285714	0.553571	0.160714	NUB1	0.516129	0.290323	0.5625
NXN	NXN	0.380952	0.587302	0.031746	NXN	0.648649	0.0540541	0.0833333	NXN	0.615385	1.42308	0.0327869
NXPE1	NXPE1	0.118056	0.854167	0.0277778
ODF2L_ENST00000294678	ODF2L_ENST00000294678	0.1	0.77	0.13
ODF2L_ENST00000359242	ODF2L_ENST00000359242	0.11	0.77	0.12
OFD1	OFD1	0.141026	0.683761	0.175214	OFD1	0.20625	0.25625	1.24242	OFD1	0.164179	2.16216	0.212435
OGT	OGT	0.124352	0.84456	0.0310881
OGT_ENST00000373719	OGT_ENST00000373719	0.131579	0.836842	0.0315789
OLAH	OLAH	0.137255	0.637255	0.22549	OLAH	0.215385	0.353846	1.64286	OLAH	0.159091	1.75676	0.291139
OPRL1	OPRL1	0.424837	0.568627	0.00653595	OPRL1	0.747126	0.0114943	0.0153846	OPRL1	0.738636	1.31818	0.00657895
OPRM1_ENST00000414028	OPRM1_ENST00000414028	0.353448	0.577586	0.0689655	OPRM1_ENST00000414028	0.61194	0.119403	0.195122
OPTN	OPTN	0.176991	0.637168	0.185841	OPTN	0.277778	0.291667	1.05	OPTN	0.215054	1.7561	0.228261
OR10G7	OR10G7	0.375661	0.613757	0.010582	OR10G7	0.612069	0.0172414	0.028169	OR10G7	0.601695	1.58904	0.0106952
OR10G8	OR10G8	0.38835	0.597087	0.0145631	OR10G8	0.650407	0.0243902	0.0375	OR10G8	0.634921	1.48193	0.0147783
OR10H1	OR10H1	0.372414	0.613793	0.0137931	OR10H1	0.606742	0.0224719	0.037037	OR10H1	0.593407	1.58929	0.013986
OR10H2	OR10H2	0.40146	0.554745	0.0437956	OR10H2	0.723684	0.0789474	0.109091	OR10H2	0.670732	1.2459	0.0458015
OR10P1	OR10P1	0.365217	0.634783	0					OR10P1	0.575342	1.7381	0
OR10R2									OR10R2	0.55303	1.69737	0.0148515
OR10Z1	OR10Z1	0.315068	0.584475	0.100457
OR11G2	OR11G2	0.368421	0.573684	0.0578947	OR11G2	0.642202	0.100917	0.157143	OR11G2	0.583333	1.34568	0.0614525
OR1C1	OR1C1	0.383085	0.59204	0.0248756	OR1C1	0.647059	0.0420168	0.0649351	OR1C1	0.620968	1.45122	0.0255102
OR1F1	OR1F1	0.386861	0.605839	0.00729927	OR1F1	0.638554	0.0120482	0.0188679	OR1F1	0.630952	1.53704	0.00735294
OR1G1	OR1G1	0.396226	0.603774	0	OR1G1	0.65625	0	0	OR1G1	0.65625	1.52381	0
OR2A12	OR2A12	0.380117	0.590643	0.0292398	OR2A12	0.643564	0.049505	0.0769231	OR2A12	0.613208	1.44286	0.0301205
OR2A2	OR2A2	0.40678	0.570621	0.0225989	OR2A2	0.712871	0.039604	0.0555556	OR2A2	0.685714	1.32895	0.0231214
OR2A5	OR2A5	0.380734	0.600917	0.0183486	OR2A5	0.633588	0.0305344	0.0481928	OR2A5	0.614815	1.50575	0.0186916
OR2B11	OR2B11	0.378698	0.568047	0.0532544	OR2B11	0.666667	0.09375	0.140625	OR2B11	0.609524	1.31507	0.05625
OR2C1	OR2C1	0.385321	0.605505	0.00917431	OR2C1	0.636364	0.0151515	0.0238095	OR2C1	0.626866	1.53488	0.00925926
OR2J2	OR2J2	0.193939	0.636364	0.169697	OR2J2	0.304762	0.266667	0.875	OR2J2	0.240602	1.75	0.20438
OR2L1P	OR2L1P	0.367925	0.622642	0.00943396	OR2L1P	0.590909	0.0151515	0.025641	OR2L1P	0.58209	1.65	0.00952381
OR2T34	OR2T34	0.384615	0.589744	0.025641	OR2T34	0.652174	0.0434783	0.0666667	OR2T34	0.625	1.4375	0.0263158
OR2T4					OR2T4	0.601307	0.0849673	0.141304	OR2T4	0.554217	1.45714	0.0530612
OR2W3					OR2W3	0.614815	0.0740741	0.120482	OR2W3	0.572414	1.45161	0.0458716
OR2Y1	OR2Y1	0.319672	0.540984	0.139344	OR2Y1	0.590909	0.257576	0.435897
OR3A4	OR3A4	0.377358	0.613208	0.00943396	OR3A4	0.615385	0.0153846	0.025	OR3A4	0.606061	1.58537	0.00952381
OR4C3	OR4C3	0.40099	0.574257	0.0247525	OR4C3	0.698276	0.0431034	0.0617284	OR4C3	0.669421	1.34884	0.0253807
OR4D1	OR4D1	0.409091	0.536364	0.0545455	OR4D1	0.762712	0.101695	0.133333	OR4D1	0.692308	1.15686	0.0576923
OR4D9									OR4D9	0.554348	1.80392	0
OR4X2	OR4X2	0.417112	0.566845	0.0160428	OR4X2	0.735849	0.0283019	0.0384615	OR4X2	0.715596	1.30864	0.0163043
OR52N5	OR52N5	0.317829	0.55814	0.124031
OR5AK2	OR5AK2	0.4	0.578571	0.0214286	OR5AK2	0.691358	0.037037	0.0535714	OR5AK2	0.666667	1.37288	0.0218978
OR5AU1					OR5AU1	0.590909	0.0454545	0.0769231	OR5AU1	0.565217	1.57143	0.0285714
OR5B2					OR5B2	0.5875	0.0375	0.0638298	OR5B2	0.566265	1.6	0.023622
OR5M10					OR5M10	0.586207	0.0574713	0.0980392	OR5M10	0.554348	1.55357	0.0362319
OR6C65	OR6C65	0.362205	0.582677	0.0551181	OR6C65	0.621622	0.0945946	0.152174	OR6C65	0.567901	1.39623	0.0583333
OR6C75	OR6C75	0.180328	0.639344	0.180328	OR6C75	0.282051	0.282051	1	OR6C75	0.22	1.77273	0.22
OR6M1	OR6M1	0.395522	0.567164	0.0373134	OR6M1	0.697368	0.0657895	0.0943396	OR6M1	0.654321	1.31034	0.0387597
OR7C1	OR7C1	0.302521	0.571429	0.12605
OR7C2	OR7C2	0.313043	0.582609	0.104348
OR8B12	OR8B12	0.378882	0.614907	0.00621118	OR8B12	0.616162	0.010101	0.0163934	OR8B12	0.61	1.59677	0.00625
OR9A4	OR9A4	0.321244	0.544041	0.134715	OR9A4	0.590476	0.247619	0.419355
OTX1	OTX1	0.368	0.608	0.024	OTX1	0.605263	0.0394737	0.0652174	OTX1	0.582278	1.55102	0.0245902
OTX2	OTX2	0.335443	0.544304	0.120253	OTX2	0.616279	0.22093	0.358491
OXSM	OXSM	0.128713	0.712871	0.158416
P2RY2					P2RY2	0.586207	0.045977	0.0784314	P2RY2	0.56044	1.58182	0.0289855
PACSIN2	PACSIN2	0.4	0.530769	0.0692308	PACSIN2	0.753623	0.130435	0.173077	PACSIN2	0.666667	1.13115	0.0743802
PAOX_ENST00000357296	PAOX_ENST00000357296	0.369369	0.594595	0.036036	PAOX_ENST00000357296	0.621212	0.0606061	0.097561	PAOX_ENST00000357296	0.585714	1.46667	0.0373832
PARN	PARN	0.110092	0.834862	0.0550459
PARN_ENST00000437198	PARN_ENST00000437198	0.104762	0.838095	0.0571429
PAX2_ENST00000428433	PAX2_ENST00000428433	0.224	0.632	0.144
PAX6	PAX6	0.173611	0.604167	0.222222	PAX6	0.287356	0.367816	1.28	PAX6	0.210084	1.52632	0.285714
PBRM1	PBRM1	0.0563525	0.527664	0.415984	PBRM1	0.106796	0.78835	7.38182	PBRM1	0.0597177	1.11714	0.712281
PBRM1_ENST00000296302	PBRM1_ENST00000296302	0.0634596	0.552712	0.383828	PBRM1_ENST00000296302	0.114815	0.694444	6.04839	PBRM1_ENST00000296302	0.0677596	1.2357	0.622924
PBRM1_ENST00000356770	PBRM1_ENST00000356770	0.0645514	0.551422	0.384026	PBRM1_ENST00000356770	0.117063	0.696429	5.94915	PBRM1_ENST00000356770	0.0690058	1.22927	0.623446
PCDHA11	PCDHA11	0.370656	0.600386	0.0289575	PCDHA11	0.617363	0.0482315	0.078125	PCDHA11	0.588957	1.50242	0.0298211
PCDHA11_ENST00000398640									PCDHA11_ENST00000398640	0.552311	1.5935	0.0306947
PCDHA9	PCDHA9	0.388462	0.592308	0.0192308	PCDHA9	0.655844	0.0324675	0.049505	PCDHA9	0.63522	1.45283	0.0196078
PCDHA9_ENST00000532602	PCDHA9_ENST00000532602	0.371622	0.611486	0.0168919	PCDHA9_ENST00000532602	0.607735	0.0276243	0.0454545	PCDHA9_ENST00000532602	0.591398	1.57391	0.0171821
PCDHB18	PCDHB18	0.457447	0.515957	0.0265957	PCDHB18	0.886598	0.0515464	0.0581395	PCDHB18	0.843137	1.06593	0.0273224
PCDHGA12	PCDHGA12	0.389034	0.608355	0.00261097	PCDHGA12	0.639485	0.00429185	0.00671141	PCDHGA12	0.636752	1.55333	0.0026178
PCDHGA12_ENST00000252085	PCDHGA12_ENST00000252085	0.388021	0.609375	0.00260417	PCDHGA12_ENST00000252085	0.636752	0.0042735	0.00671141	PCDHGA12_ENST00000252085	0.634043	1.56	0.00261097
PCDHGA3	PCDHGA3	0.365	0.5975	0.0375	PCDHGA3	0.610879	0.0627615	0.10274	PCDHGA3	0.574803	1.48447	0.038961
PCDHGA3_ENST00000253812	PCDHGA3_ENST00000253812	0.370709	0.592677	0.0366133	PCDHGA3_ENST00000253812	0.625483	0.0617761	0.0987654	PCDHGA3_ENST00000253812	0.589091	1.45506	0.0380048
PCDHGA5									PCDHGA5	0.564286	1.63855	0.0186047
PCDHGA5_ENST00000518069									PCDHGA5_ENST00000518069	0.560714	1.64848	0.018648
PCDHGA9					PCDHGA9	0.608696	0.068323	0.112245	PCDHGA9	0.569767	1.47706	0.042471
PCDHGA9_ENST00000573521					PCDHGA9_ENST00000573521	0.608696	0.068323	0.112245	PCDHGA9_ENST00000573521	0.569767	1.47706	0.042471
PCDHGB1	PCDHGB1	0.36802	0.609137	0.0228426	PCDHGB1	0.604167	0.0375	0.062069	PCDHGB1	0.582329	1.55844	0.0233766
PCDHGB1_ENST00000523390	PCDHGB1_ENST00000523390	0.370558	0.609137	0.0203046	PCDHGB1_ENST00000523390	0.608333	0.0333333	0.0547945	PCDHGB1_ENST00000523390	0.58871	1.55844	0.0207254
PDCD1	PDCD1	0.111111	0.703704	0.185185	PDCD1	0.157895	0.263158	1.66667	PDCD1	0.125	2.375	0.227273
PDE6B					PDE6B	0.594937	0.0443038	0.0744681	PDE6B	0.569697	1.56436	0.0277778
PDS5A	PDS5A	0.139442	0.820717	0.0398406
PDS5B	PDS5B	0.159236	0.649682	0.191083	PDS5B	0.245098	0.294118	1.2	PDS5B	0.189394	1.85455	0.23622
PGC	PGC	0.370968	0.596774	0.0322581	PGC	0.621622	0.0540541	0.0869565	PGC	0.589744	1.48	0.0333333
PHACTR2	PHACTR2	0.136364	0.825758	0.0378788
PHACTR4	PHACTR4	0.140127	0.611465	0.248408	PHACTR4	0.229167	0.40625	1.77273	PHACTR4	0.162963	1.57377	0.330508
PHF2	PHF2	0.296703	0.582418	0.120879
PHF6	PHF6	0.0613497	0.607362	0.331288	PHF6	0.10101	0.545455	5.4	PHF6	0.0653595	1.54688	0.495413
PHF6_ENST00000332070	PHF6_ENST00000332070	0.0757576	0.613636	0.310606	PHF6_ENST00000332070	0.123457	0.506173	4.1	PHF6_ENST00000332070	0.0819672	1.58824	0.450549
PHTF1	PHTF1	0.143791	0.699346	0.156863
PIAS2	PIAS2	0.110294	0.867647	0.0220588
PIAS2_ENST00000324794	PIAS2_ENST00000324794	0.139344	0.836066	0.0245902
PIGB	PIGB	0.174757	0.631068	0.194175	PIGB	0.276923	0.307692	1.11111	PIGB	0.211765	1.71053	0.240964
PIGG_ENST00000453061									PIGG_ENST00000453061	0.567901	1.76087	0
PIGT	PIGT	0.305085	0.584746	0.110169
PIK3C2G	PIK3C2G	0.121849	0.823529	0.0546218
PIK3C2G_ENST00000433979	PIK3C2G_ENST00000433979	0.119318	0.822443	0.0582386
PIK3C2G_ENST00000538779	PIK3C2G_ENST00000538779	0.0912698	0.859127	0.0496032	PIK3C2G_ENST00000538779	0.106236	0.0577367	0.543478	PIK3C2G_ENST00000538779	0.100437	6.09859	0.0521921
PIK3CA	PIK3CA	0.0100889	0.983071	0.00683995	PIK3CA	0.0102627	0.00695773	0.677966	PIK3CA	0.0101917	58.0707	0.00688705
PIK3CA_ENST00000263967	PIK3CA_ENST00000263967	0.0103749	0.98208	0.00754539	PIK3CA_ENST00000263967	0.0105642	0.00768307	0.727273	PIK3CA_ENST00000263967	0.0104837	54.8026	0.00760276
PIK3CB	PIK3CB	0.113314	0.82153	0.0651558
PIK3R1	PIK3R1	0.0561331	0.692308	0.251559	PIK3R1	0.0810811	0.363363	4.48148	PIK3R1	0.0594714	2.25	0.336111
PIK3R1_ENST00000320694	PIK3R1_ENST00000320694	0.0406977	0.703488	0.255814	PIK3R1_ENST00000320694	0.0578512	0.363636	6.28571	PIK3R1_ENST00000320694	0.0424242	2.37255	0.34375
PIK3R1_ENST00000336483	PIK3R1_ENST00000336483	0.0404624	0.705202	0.254335	PIK3R1_ENST00000336483	0.057377	0.360656	6.28571	PIK3R1_ENST00000336483	0.0421687	2.39216	0.341085
PIK3R3	PIK3R3	0.0679012	0.796296	0.135802	PIK3R3	0.0852713	0.170543	2	PIK3R3	0.0728477	3.90909	0.157143
PIK3R3_ENST00000540385	PIK3R3_ENST00000540385	0.0775862	0.775862	0.146552	PIK3R3_ENST00000540385	0.1	0.188889	1.88889	PIK3R3_ENST00000540385	0.0841121	3.46154	0.171717
PIP5K1C_ENST00000537021	PIP5K1C_ENST00000537021	0.181818	0.818182	0
PITRM1_ENST00000451104	PITRM1_ENST00000451104	0.157609	0.820652	0.0217391
PKN2	PKN2	0.100559	0.798883	0.100559
PLBD2	PLBD2	0.382609	0.556522	0.0608696	PLBD2	0.6875	0.109375	0.159091	PLBD2	0.619718	1.2549	0.0648148
PLCG1	PLCG1	0.15	0.822	0.028
PLEKHA6	PLEKHA6	0.195965	0.605187	0.198847	PLEKHA6	0.32381	0.328571	1.01471	PLEKHA6	0.243728	1.53285	0.248201
PLEKHS1	PLEKHS1	0.138889	0.824074	0.037037
PLK2	PLK2	0.0966387	0.756303	0.147059
PLUNC	PLUNC	0.391304	0.556522	0.0521739	PLUNC	0.703125	0.09375	0.133333	PLUNC	0.642857	1.2549	0.0550459
PMS1	PMS1	0.105263	0.778947	0.115789
PNCK_ENST00000370145	PNCK_ENST00000370145	0.415094	0.575472	0.00943396	PNCK_ENST00000370145	0.721311	0.0163934	0.0227273	PNCK_ENST00000370145	0.709677	1.35556	0.00952381
PNCK_ENST00000393831	PNCK_ENST00000393831	0.415929	0.575221	0.00884956	PNCK_ENST00000393831	0.723077	0.0153846	0.0212766	PNCK_ENST00000393831	0.712121	1.35417	0.00892857
PNCK_ENST00000447676	PNCK_ENST00000447676	0.389831	0.576271	0.0338983	PNCK_ENST00000447676	0.676471	0.0588235	0.0869565	PNCK_ENST00000447676	0.638889	1.36	0.0350877
PNISR	PNISR	0.112426	0.704142	0.183432	PNISR	0.159664	0.260504	1.63158	PNISR	0.126667	2.38	0.224638
PNKP	PNKP	0.383929	0.571429	0.0446429	PNKP	0.671875	0.078125	0.116279	PNKP	0.623188	1.33333	0.046729
PNKP_ENST00000322344	PNKP_ENST00000322344	0.387387	0.567568	0.045045	PNKP_ENST00000322344	0.68254	0.0793651	0.116279	PNKP_ENST00000322344	0.632353	1.3125	0.0471698
PNMAL2_ENST00000599531	PNMAL2_ENST00000599531	0.369318	0.602273	0.0284091	PNMAL2_ENST00000599531	0.613208	0.0471698	0.0769231	PNMAL2_ENST00000599531	0.585586	1.51429	0.0292398
POLE	POLE	0.140102	0.819289	0.0406091
POLG2	POLG2	0.128713	0.851485	0.019802
POLM	POLM	0.171875	0.640625	0.1875	POLM	0.268293	0.292683	1.09091	POLM	0.207547	1.78261	0.230769
POT1	POT1	0.108209	0.809701	0.0820896
POT1_ENST00000357628	POT1_ENST00000357628	0.111111	0.813492	0.0753968
POTEM	POTEM	0.164384	0.815068	0.0205479
POTEM_ENST00000551509	POTEM_ENST00000551509	0.140845	0.838028	0.0211268
PPHLN1_ENST00000432191	PPHLN1_ENST00000432191	0.129032	0.830645	0.0403226
PPIG	PPIG	0.141509	0.698113	0.160377
PPM1D	PPM1D	0.0988142	0.533597	0.367589	PPM1D	0.185185	0.688889	3.72	PPM1D	0.109649	1.14407	0.58125
PPP2R1A	PPP2R1A	0.0990991	0.869369	0.0315315	PPP2R1A	0.11399	0.0362694	0.318182
PPP2R3B	PPP2R3B	0.441176	0.447059	0.111765	PPP2R3B	0.986842	0.25	0.253333	PPP2R3B	0.789474	0.808511	0.125828
PPP2R3B_ENST00000390665	PPP2R3B_ENST00000390665	0.43787	0.449704	0.112426	PPP2R3B_ENST00000390665	0.973684	0.25	0.256757	PPP2R3B_ENST00000390665	0.778947	0.817204	0.126667
PPP2R5D	PPP2R5D	0.326531	0.585034	0.0884354
PPP6C	PPP6C	0.0823529	0.794118	0.123529	PPP6C	0.103704	0.155556	1.5	PPP6C	0.0897436	3.85714	0.14094
PPP6C_ENST00000451402	PPP6C_ENST00000451402	0.0787879	0.8	0.121212	PPP6C_ENST00000451402	0.0984848	0.151515	1.53846	PPP6C_ENST00000451402	0.0855263	4	0.137931
PRAM1	PRAM1	0.365591	0.634409	0					PRAM1	0.576271	1.73529	0
PRAMEF2	PRAMEF2	0.375	0.590909	0.0340909	PRAMEF2	0.634615	0.0576923	0.0909091	PRAMEF2	0.6	1.44444	0.0352941
PRB3	PRB3	0.0529801	0.900662	0.0463576	PRB3	0.0588235	0.0514706	0.875	PRB3	0.0559441	9.06667	0.0486111
PRB3_ENST00000538488	PRB3_ENST00000538488	0.0671141	0.885906	0.0469799	PRB3_ENST00000538488	0.0757576	0.0530303	0.7	PRB3_ENST00000538488	0.0719424	7.76471	0.0492958
PREPL	PREPL	0.11811	0.850394	0.0314961
PRF1	PRF1	0.372973	0.578378	0.0486486	PRF1	0.64486	0.0841121	0.130435	PRF1	0.594828	1.37179	0.0511364
PRKACG	PRKACG	0.402235	0.581006	0.0167598	PRKACG	0.692308	0.0288462	0.0416667	PRKACG	0.672897	1.38667	0.0170455
PRKAR1B	PRKAR1B	0.344538	0.546218	0.109244	PRKAR1B	0.630769	0.2	0.317073
PRKCI	PRKCI	0.0958084	0.826347	0.0778443	PRKCI	0.115942	0.0942029	0.8125
PRL					PRL	0.59322	0.101695	0.171429
PRLHR	PRLHR	0.41358	0.567901	0.0185185	PRLHR	0.728261	0.0326087	0.0447761	PRLHR	0.705263	1.31429	0.0188679
PRMT3	PRMT3	0.284314	0.578431	0.137255
PROM2					PROM2	0.590604	0.0536913	0.0909091	PROM2	0.56051	1.55208	0.0337553
PRR23C									PRR23C	0.567568	1.63636	0.0175439
PRR5	PRR5	0.37963	0.583333	0.037037	PRR5	0.650794	0.0634921	0.097561	PRR5	0.61194	1.4	0.0384615
PRR5_ENST00000403581	PRR5_ENST00000403581	0.366071	0.5625	0.0714286	PRR5_ENST00000403581	0.650794	0.126984	0.195122	PRR5_ENST00000403581	0.577465	1.28571	0.0769231
PRR5-ARHGAP8	PRR5-ARHGAP8	0.368421	0.596491	0.0350877	PRR5-ARHGAP8	0.617647	0.0588235	0.0952381	PRR5-ARHGAP8	0.583333	1.47826	0.0363636
PRRT2	PRRT2	0.2	0.514286	0.285714	PRRT2	0.388889	0.555556	1.42857	PRRT2	0.25	1.05882	0.4
PRSS38	PRSS38	0.378378	0.560811	0.0608108	PRSS38	0.674699	0.108434	0.160714	PRSS38	0.608696	1.27692	0.0647482
PSAPL1_ENST00000319098	PSAPL1_ENST00000319098	0.424528	0.518868	0.0566038	PSAPL1_ENST00000319098	0.818182	0.109091	0.133333	PSAPL1_ENST00000319098	0.737705	1.07843	0.06
PSEN2	PSEN2	0.385321	0.59633	0.0183486	PSEN2	0.646154	0.0307692	0.047619	PSEN2	0.626866	1.47727	0.0186916
PSIP1_ENST00000380733	PSIP1_ENST00000380733	0.162162	0.648649	0.189189	PSIP1_ENST00000380733	0.25	0.291667	1.16667	PSIP1_ENST00000380733	0.193548	1.84615	0.233333
PSPC1	PSPC1	0.112903	0.822581	0.0645161
PTCH1	PTCH1	0.148789	0.615917	0.235294	PTCH1	0.241573	0.382022	1.5814	PTCH1	0.174797	1.6036	0.307692
PTCH1_ENST00000331920	PTCH1_ENST00000331920	0.17192	0.647564	0.180516	PTCH1_ENST00000331920	0.265487	0.278761	1.05	PTCH1_ENST00000331920	0.207612	1.8374	0.22028
PTCH1_ENST00000375274	PTCH1_ENST00000375274	0.178994	0.650888	0.170118	PTCH1_ENST00000375274	0.275	0.261364	0.950413	PTCH1_ENST00000375274	0.218018	1.86441	0.204991
PTCH1_ENST00000430669	PTCH1_ENST00000430669	0.180672	0.648459	0.170868	PTCH1_ENST00000430669	0.278618	0.263499	0.945736	PTCH1_ENST00000430669	0.220513	1.84462	0.206081
PTEN	PTEN	0.0171558	0.613995	0.368849	PTEN	0.0279412	0.600735	21.5	PTEN	0.0174552	1.59064	0.584406
PTPN11	PTPN11	0.0910816	0.880455	0.028463	PTPN11	0.103448	0.0323276	0.3125	PTPN11	0.100209	7.36508	0.0292969
PTPN2	PTPN2	0.147059	0.696078	0.156863
PTPRS_ENST00000262963	PTPRS_ENST00000262963	0.0865385	0.887019	0.0264423	PTPRS_ENST00000262963	0.097561	0.0298103	0.305556	PTPRS_ENST00000262963	0.0947368	7.85106	0.0271605
PTPRU_ENST00000323874	PTPRU_ENST00000323874	0.175	0.825	0
PTX4					PTX4	0.591837	0.102041	0.172414
PUF60					PUF60	0.585714	0.0285714	0.0487805	PUF60	0.569444	1.62791	0.018018
PUS7	PUS7	0.148649	0.675676	0.175676	PUS7	0.22	0.26	1.18182	PUS7	0.174603	2.08333	0.213115
Q99543-2	Q99543-2	0.173554	0.669421	0.157025
QKI	QKI	0.15748	0.566929	0.275591	QKI	0.277778	0.486111	1.75	QKI	0.186916	1.30909	0.380435
QKI_ENST00000275262	QKI_ENST00000275262	0.119403	0.5	0.380597	QKI_ENST00000275262	0.238806	0.761194	3.1875	QKI_ENST00000275262	0.135593	1	0.614458
QKI_ENST00000392127	QKI_ENST00000392127	0.147059	0.558824	0.294118	QKI_ENST00000392127	0.263158	0.526316	2	QKI_ENST00000392127	0.172414	1.26667	0.416667
QKI_ENST00000453779	QKI_ENST00000453779	0.156863	0.54902	0.294118	QKI_ENST00000453779	0.285714	0.535714	1.875	QKI_ENST00000453779	0.186047	1.21739	0.416667
QSOX1					QSOX1	0.605263	0.0614035	0.101449	QSOX1	0.570248	1.5	0.0382514
RAB11FIP5	RAB11FIP5	0.305195	0.577922	0.116883
RAC1	RAC1	0.10119	0.886905	0.0119048	RAC1	0.114094	0.0134228	0.117647	RAC1	0.112583	7.84211	0.0120482
RAC1_ENST00000356142	RAC1_ENST00000356142	0.115152	0.872727	0.0121212
RAD21	RAD21	0.105455	0.752727	0.141818
RAD50	RAD50	0.0868347	0.787115	0.12605	RAD50	0.11032	0.160142	1.45161	RAD50	0.095092	3.69737	0.144231
RAD50_ENST00000265335	RAD50_ENST00000265335	0.0827068	0.802005	0.115288	RAD50_ENST00000265335	0.103125	0.14375	1.39394	RAD50_ENST00000265335	0.0901639	4.05063	0.130312
RAD51B_ENST00000487270	RAD51B_ENST00000487270	0.141509	0.820755	0.0377358
RAD54B	RAD54B	0.177215	0.670886	0.151899
RAF1	RAF1	0.125448	0.835125	0.0394265
RAF1_ENST00000442415	RAF1_ENST00000442415	0.12963	0.82963	0.0407407
RAPGEF6_ENST00000307984	RAPGEF6_ENST00000307984	0.170819	0.669039	0.160142
RAPGEF6_ENST00000509018	RAPGEF6_ENST00000509018	0.188742	0.655629	0.155629
RARA	RARA	0.123288	0.853881	0.0228311
RARA_ENST00000394081	RARA_ENST00000394081	0.110526	0.863158	0.0263158
RASA1	RASA1	0.0751174	0.711268	0.213615	RASA1	0.105611	0.30033	2.84375	RASA1	0.0812183	2.46341	0.271642
RASA1_ENST00000456692	RASA1_ENST00000456692	0.078329	0.697128	0.224543	RASA1_ENST00000456692	0.11236	0.322097	2.86667	RASA1_ENST00000456692	0.0849858	2.30172	0.289562
RB1	RB1	0.0423826	0.382589	0.575029	RB1	0.110778	1.50299	13.5676	RB1	0.0442584	0.619666	1.3531
RB1_ENST00000267163	RB1_ENST00000267163	0.0483425	0.403315	0.548343	RB1_ENST00000267163	0.119863	1.35959	11.3429	RB1_ENST00000267163	0.0507983	0.675926	1.21407
RBBP5	RBBP5	0.191667	0.65	0.158333
RBM10	RBM10	0.0756144	0.586011	0.338374	RBM10	0.129032	0.577419	4.475	RBM10	0.0817996	1.41553	0.511429
RBM25	RBM25	0.137755	0.831633	0.0306122
RBM27	RBM27	0.178261	0.626087	0.195652	RBM27	0.284722	0.3125	1.09756	RBM27	0.216931	1.67442	0.243243
RBM4	RBM4	0.401639	0.590164	0.00819672	RBM4	0.680556	0.0138889	0.0204082	RBM4	0.671233	1.44	0.00826446
RBM45	RBM45	0.181818	0.578512	0.239669	RBM45	0.314286	0.414286	1.31818	RBM45	0.222222	1.37255	0.315217
RBM46	RBM46	0.191919	0.651515	0.156566
RBM6	RBM6	0.185965	0.645614	0.168421	RBM6	0.288043	0.26087	0.90566	RBM6	0.228448	1.82178	0.202532
RBPJ	RBPJ	0.251908	0.59542	0.152672	RBPJ	0.423077	0.25641	0.606061
RBPJ_ENST00000348160	RBPJ_ENST00000348160	0.254098	0.581967	0.163934	RBPJ_ENST00000348160	0.43662	0.28169	0.645161
RCOR3	RCOR3	0.14	0.82	0.04
RDBP	RDBP	0.211009	0.568807	0.220183	RDBP	0.370968	0.387097	1.04348	RDBP	0.267442	1.31915	0.282353
RECQL4	RECQL4	0.110482	0.864023	0.0254958
REL	REL	0.112994	0.847458	0.039548
RET	RET	0.133333	0.838235	0.0284314
RFX5	RFX5	0.166667	0.641975	0.191358	RFX5	0.259615	0.298077	1.14815	RFX5	0.2	1.7931	0.236641
RGR	RGR	0.44	0.54	0.02	RGR	0.814815	0.037037	0.0454545	RGR	0.785714	1.17391	0.0204082
RHO									RHO	0.566265	1.65306	0.015625
RHOA	RHOA	0.0487013	0.941558	0.00974026	RHOA	0.0517241	0.0103448	0.2	RHOA	0.0511945	16.1111	0.00983607
RICTOR_ENST00000296782	RICTOR_ENST00000296782	0.11976	0.818363	0.0618762
RINT1	RINT1	0.197279	0.659864	0.142857
RIOK2	RIOK2	0.109244	0.798319	0.092437
RIT1	RIT1	0.0917431	0.853211	0.0550459	RIT1	0.107527	0.0645161	0.6	RIT1	0.10101	5.8125	0.0582524
RNF103	RNF103	0.202614	0.653595	0.143791
RNF111	RNF111	0.137441	0.701422	0.161137
RNF111_ENST00000434298	RNF111_ENST00000434298	0.136585	0.707317	0.156098
RNF128_ENST00000324342	RNF128_ENST00000324342	0.17931	0.565517	0.255172	RNF128_ENST00000324342	0.317073	0.45122	1.42308	RNF128_ENST00000324342	0.218487	1.30159	0.342593
RNF26									RNF26	0.552239	1.6	0.029703
RNF43	RNF43	0.0601719	0.459885	0.479943	RNF43	0.130841	1.04361	7.97619	RNF43	0.0640244	0.851459	0.922865
RNF6	RNF6	0.155844	0.655844	0.188312	RNF6	0.237624	0.287129	1.20833	RNF6	0.184615	1.90566	0.232
ROCK2	ROCK2	0.131944	0.722222	0.145833
RP11-368J21.2	RP11-368J21.2	0.366812	0.624454	0.00873362	RP11-368J21.2	0.587413	0.013986	0.0238095	RP11-368J21.2	0.57931	1.66279	0.00881057
RP11-368J21.2_ENST00000424340	RP11-368J21.2_ENST00000424340	0.368421	0.622807	0.00877193	RP11-368J21.2_ENST00000424340	0.591549	0.0140845	0.0238095	RP11-368J21.2_ENST00000424340	0.583333	1.65116	0.00884956
RP3-402G11_5	RP3-402G11_5	0.387387	0.576577	0.036036	RP3-402G11_5	0.671875	0.0625	0.0930233	RP3-402G11_5	0.632353	1.3617	0.0373832
RPL22	RPL22	0.00813008	0.252033	0.739837	RPL22	0.0322581	2.93548	91	RPL22	0.00819672	0.336957	2.84375
RPN2	RPN2	0.383929	0.544643	0.0714286	RPN2	0.704918	0.131148	0.186047	RPN2	0.623188	1.19608	0.0769231
RPS6KL1	RPS6KL1	0.366337	0.594059	0.039604	RPS6KL1	0.616667	0.0666667	0.108108	RPS6KL1	0.578125	1.46341	0.0412371
RSF1	RSF1	0.148276	0.696552	0.155172
RSL1D1	RSL1D1	0.106195	0.867257	0.0265487
RTDR1	RTDR1	0.409091	0.563636	0.0272727	RTDR1	0.725806	0.0483871	0.0666667	RTDR1	0.692308	1.29167	0.0280374
RTKN2	RTKN2	0.189024	0.567073	0.243902	RTKN2	0.333333	0.430108	1.29032	RTKN2	0.233083	1.30986	0.322581
RTKN2_ENST00000395265	RTKN2_ENST00000395265	0.233333	0.625	0.141667
RTN4_ENST00000337526	RTN4_ENST00000337526	0.139423	0.663462	0.197115	RTN4_ENST00000337526	0.210145	0.297101	1.41379	RTN4_ENST00000337526	0.162011	1.97143	0.245509
RTN4RL1	RTN4RL1	0.377049	0.598361	0.0245902	RTN4RL1	0.630137	0.0410959	0.0652174	RTN4RL1	0.605263	1.4898	0.0252101
RUFY2	RUFY2	0.162162	0.666667	0.171171	RUFY2	0.243243	0.256757	1.05556	RUFY2	0.193548	2	0.206522
RUNX1	RUNX1	0.0974359	0.75641	0.146154
RUNX1_ENST00000325074	RUNX1_ENST00000325074	0.0364964	0.875912	0.0875912	RUNX1_ENST00000325074	0.0416667	0.1	2.4	RUNX1_ENST00000325074	0.0378788	7.05882	0.096
RUNX1_ENST00000344691	RUNX1_ENST00000344691	0.035461	0.879433	0.0851064	RUNX1_ENST00000344691	0.0403226	0.0967742	2.4	RUNX1_ENST00000344691	0.0367647	7.29412	0.0930233
RUNX1_ENST00000486278	RUNX1_ENST00000486278	0.047619	0.85119	0.10119	RUNX1_ENST00000486278	0.0559441	0.118881	2.125	RUNX1_ENST00000486278	0.05	5.72	0.112583
RUNX2	RUNX2	0.486111	0.425926	0.087963	RUNX2	1.1413	0.206522	0.180952	RUNX2	0.945946	0.741935	0.0964467
RUNX2_ENST00000352853	RUNX2_ENST00000352853	0.486486	0.418919	0.0945946	RUNX2_ENST00000352853	1.16129	0.225806	0.194444	RUNX2_ENST00000352853	0.947368	0.72093	0.104478
S1PR3	S1PR3	0.375	0.601562	0.0234375	S1PR3	0.623377	0.038961	0.0625	S1PR3	0.6	1.5098	0.024
S1PR5									S1PR5	0.569444	1.7561	0
SAFB2	SAFB2	0.25	0.595455	0.154545	SAFB2	0.419847	0.259542	0.618182
SAG	SAG	0.140187	0.82243	0.0373832
SAG_ENST00000409110	SAG_ENST00000409110	0.136364	0.827273	0.0363636
SAMSN1_ENST00000285670	SAMSN1_ENST00000285670	0.1875	0.66875	0.14375
SARDH					SARDH	0.596774	0.0645161	0.108108	SARDH	0.560606	1.5122	0.040404
SARDH_ENST00000371868	SARDH_ENST00000371868	0.396396	0.585586	0.018018	SARDH_ENST00000371868	0.676923	0.0307692	0.0454545	SARDH_ENST00000371868	0.656716	1.41304	0.0183486
SASS6	SASS6	0.181818	0.661157	0.157025
SBK1_ENST00000341901	SBK1_ENST00000341901	0.408333	0.558333	0.0333333	SBK1_ENST00000341901	0.731343	0.0597015	0.0816327	SBK1_ENST00000341901	0.690141	1.26415	0.0344828
SBNO1	SBNO1	0.147059	0.705882	0.147059
SCAF4	SCAF4	0.147692	0.68	0.172308	SCAF4	0.217195	0.253394	1.16667	SCAF4	0.173285	2.125	0.208178
SCLT1	SCLT1	0.175758	0.654545	0.169697	SCLT1	0.268519	0.259259	0.965517	SCLT1	0.213235	1.89474	0.20438
SCLT1_ENST00000281142	SCLT1_ENST00000281142	0.177143	0.605714	0.217143	SCLT1_ENST00000281142	0.292453	0.358491	1.22581	SCLT1_ENST00000281142	0.215278	1.53623	0.277372
SEC14L4	SEC14L4	0.369748	0.596639	0.0336134	SEC14L4	0.619718	0.056338	0.0909091	SEC14L4	0.586667	1.47917	0.0347826
SEC31A_ENST00000395310	SEC31A_ENST00000395310	0.189723	0.612648	0.197628	SEC31A_ENST00000395310	0.309677	0.322581	1.04167	SEC31A_ENST00000395310	0.234146	1.58163	0.246305
SEC31A_ENST00000432794	SEC31A_ENST00000432794	0.19403	0.58209	0.223881	SEC31A_ENST00000432794	0.333333	0.384615	1.15385	SEC31A_ENST00000432794	0.240741	1.39286	0.288462
SEC63	SEC63	0.150838	0.653631	0.195531	SEC63	0.230769	0.299145	1.2963	SEC63	0.177632	1.8871	0.243056
SENP1_ENST00000448372	SENP1_ENST00000448372	0.148438	0.6875	0.164062
SENP6	SENP6	0.19598	0.623116	0.180905	SENP6	0.314516	0.290323	0.923077	SENP6	0.24375	1.65333	0.220859
SENP6_ENST00000370014	SENP6_ENST00000370014	0.202381	0.630952	0.166667	SENP6_ENST00000370014	0.320755	0.264151	0.823529
SENP6_ENST00000447266	SENP6_ENST00000447266	0.211957	0.630435	0.157609	SENP6_ENST00000447266	0.336207	0.25	0.74359
SERPINA4	SERPINA4	0.341176	0.570588	0.0882353	SERPINA4	0.597938	0.154639	0.258621
SERPINA5	SERPINA5	0.372671	0.596273	0.0310559	SERPINA5	0.625	0.0520833	0.0833333	SERPINA5	0.594059	1.47692	0.0320513
SERPINA6									SERPINA6	0.566265	1.65306	0.015625
SERPINA6_ENST00000341584									SERPINA6_ENST00000341584	0.55	1.69565	0.0163934
SERPINB10	SERPINB10	0.181102	0.637795	0.181102	SERPINB10	0.283951	0.283951	1	SERPINB10	0.221154	1.76087	0.221154
SETD2	SETD2	0.0614754	0.654713	0.283811	SETD2	0.0938967	0.43349	4.61667	SETD2	0.0655022	1.89614	0.39628
SETD2_ENST00000409792	SETD2_ENST00000409792	0.0660633	0.648869	0.285068	SETD2_ENST00000409792	0.101813	0.439331	4.31507	SETD2_ENST00000409792	0.0707364	1.84794	0.398734
SF3B1	SF3B1	0.0429043	0.943069	0.0140264	SF3B1	0.0454943	0.0148731	0.326923	SF3B1	0.0448276	16.5652	0.0142259
SGIP1_ENST00000371039	SGIP1_ENST00000371039	0.113636	0.835227	0.0511364
SH3BP2	SH3BP2	0.355769	0.567308	0.0769231	SH3BP2	0.627119	0.135593	0.216216	SH3BP2	0.552239	1.31111	0.0833333
SHANK3_ENST00000445220					SHANK3_ENST00000445220	0.588235	0.0588235	0.1	SHANK3_ENST00000445220	0.555556	1.54545	0.037037
SHQ1	SHQ1	0.0985915	0.809859	0.0915493
SIN3A	SIN3A	0.186391	0.66568	0.147929
SIX6					SIX6	0.59375	0.0625	0.105263	SIX6	0.558824	1.52381	0.0392157
SKOR2	SKOR2	0.359223	0.582524	0.0582524	SKOR2	0.616667	0.1	0.162162	SKOR2	0.560606	1.39535	0.0618557
SLAIN1	SLAIN1	0.231481	0.601852	0.166667	SLAIN1	0.384615	0.276923	0.72
SLC12A7	SLC12A7	0.351351	0.567568	0.0810811	SLC12A7	0.619048	0.142857	0.230769
SLC13A3_ENST00000372121	SLC13A3_ENST00000372121	0.396396	0.504505	0.0990991	SLC13A3_ENST00000372121	0.785714	0.196429	0.25	SLC13A3_ENST00000372121	0.656716	1.01818	0.11
SLC14A1	SLC14A1	0.147541	0.819672	0.0327869
SLC14A1_ENST00000436407	SLC14A1_ENST00000436407	0.142857	0.827068	0.0300752
SLC16A1	SLC16A1	0.19802	0.613861	0.188119	SLC16A1	0.322581	0.306452	0.95	SLC16A1	0.246914	1.58974	0.231707
SLC16A12	SLC16A12	0.315315	0.576577	0.108108
SLC16A12_ENST00000371790	SLC16A12_ENST00000371790	0.344538	0.537815	0.117647	SLC16A12_ENST00000371790	0.640625	0.21875	0.341463
SLC16A3	SLC16A3	0.441176	0.5	0.0588235	SLC16A3	0.882353	0.117647	0.133333	SLC16A3	0.789474	1	0.0625
SLC17A2	SLC17A2	0.302703	0.572973	0.124324
SLC18A3	SLC18A3	0.415385	0.565385	0.0192308	SLC18A3	0.734694	0.0340136	0.0462963	SLC18A3	0.710526	1.30088	0.0196078
SLC19A3									SLC19A3	0.554217	1.63265	0.0238095
SLC1A7	SLC1A7	0.388889	0.6	0.0111111	SLC1A7	0.648148	0.0185185	0.0285714	SLC1A7	0.636364	1.5	0.011236
SLC20A2	SLC20A2	0.368715	0.592179	0.0391061	SLC20A2	0.622642	0.0660377	0.106061	SLC20A2	0.584071	1.45205	0.0406977
SLC22A11	SLC22A11	0.374332	0.59893	0.026738	SLC22A11	0.625	0.0446429	0.0714286	SLC22A11	0.598291	1.49333	0.0274725
SLC22A14									SLC22A14	0.557692	1.6129	0.0253165
SLC22A4	SLC22A4	0.196721	0.622951	0.180328	SLC22A4	0.315789	0.289474	0.916667	SLC22A4	0.244898	1.65217	0.22
SLC22A9	SLC22A9	0.221622	0.616216	0.162162	SLC22A9	0.359649	0.263158	0.731707
SLC23A2	SLC23A2	0.22043	0.580645	0.198925	SLC23A2	0.37963	0.342593	0.902439	SLC23A2	0.282759	1.38462	0.248322
SLC24A3					SLC24A3	0.592357	0.0382166	0.0645161	SLC24A3	0.570552	1.58586	0.024
SLC25A6	SLC25A6	0.390625	0.523438	0.0859375	SLC25A6	0.746269	0.164179	0.22	SLC25A6	0.641026	1.09836	0.0940171
SLC26A6	SLC26A6	0.367742	0.606452	0.0258065	SLC26A6	0.606383	0.0425532	0.0701754	SLC26A6	0.581633	1.54098	0.0264901
SLC26A6_ENST00000383733	SLC26A6_ENST00000383733	0.390411	0.582192	0.0273973	SLC26A6_ENST00000383733	0.670588	0.0470588	0.0701754	SLC26A6_ENST00000383733	0.640449	1.39344	0.028169
SLC27A3	SLC27A3	0.11194	0.679104	0.208955	SLC27A3	0.164835	0.307692	1.86667	SLC27A3	0.12605	2.11628	0.264151
SLC28A1_ENST00000537624	SLC28A1_ENST00000537624	0.359281	0.580838	0.0598802	SLC28A1_ENST00000537624	0.618557	0.103093	0.166667	SLC28A1_ENST00000537624	0.560748	1.38571	0.0636943
SLC2A1	SLC2A1	0.397059	0.588235	0.0147059	SLC2A1	0.675	0.025	0.037037	SLC2A1	0.658537	1.42857	0.0149254
SLC2A8	SLC2A8	0.394495	0.577982	0.0275229	SLC2A8	0.68254	0.047619	0.0697674	SLC2A8	0.651515	1.36957	0.0283019
SLC34A2	SLC34A2	0.368231	0.602888	0.0288809	SLC34A2	0.610778	0.0479042	0.0784314	SLC34A2	0.582857	1.51818	0.0297398
SLC35F3	SLC35F3	0.366516	0.60181	0.0316742	SLC35F3	0.609023	0.0526316	0.0864198	SLC35F3	0.578571	1.51136	0.0327103
SLC35F5	SLC35F5	0.150442	0.681416	0.168142	SLC35F5	0.220779	0.246753	1.11765	SLC35F5	0.177083	2.13889	0.202128
SLC39A4_ENST00000276833					SLC39A4_ENST00000276833	0.592593	0.0617284	0.104167	SLC39A4_ENST00000276833	0.55814	1.5283	0.0387597
SLC3A2	SLC3A2	0.159091	0.628788	0.212121	SLC3A2	0.253012	0.337349	1.33333	SLC3A2	0.189189	1.69388	0.269231
SLC41A1	SLC41A1	0.364341	0.581395	0.0542636	SLC41A1	0.626667	0.0933333	0.148936	SLC41A1	0.573171	1.38889	0.057377
SLC44A3_ENST00000271227	SLC44A3_ENST00000271227	0.184397	0.673759	0.141844
SLC45A1	SLC45A1	0.389908	0.582569	0.0275229	SLC45A1	0.669291	0.0472441	0.0705882	SLC45A1	0.639098	1.3956	0.0283019
SLC45A1_ENST00000377479	SLC45A1_ENST00000377479	0.38191	0.59799	0.0201005	SLC45A1_ENST00000377479	0.638655	0.0336134	0.0526316	SLC45A1_ENST00000377479	0.617886	1.4875	0.0205128
SLC45A4	SLC45A4	0.387205	0.585859	0.026936	SLC45A4	0.66092	0.045977	0.0695652	SLC45A4	0.631868	1.41463	0.0276817
SLC45A4_ENST00000517878									SLC45A4_ENST00000517878	0.561728	1.60825	0.0242915
SLC46A2	SLC46A2	0.37037	0.592593	0.037037	SLC46A2	0.625	0.0625	0.1	SLC46A2	0.588235	1.45455	0.0384615
SLC47A1	SLC47A1	0.390977	0.548872	0.0601504	SLC47A1	0.712329	0.109589	0.153846	SLC47A1	0.641975	1.21667	0.064
SLC5A2	SLC5A2	0.375661	0.582011	0.042328	SLC5A2	0.645455	0.0727273	0.112676	SLC5A2	0.601695	1.39241	0.0441989
SLC6A18	SLC6A18	0.384279	0.60262	0.0131004	SLC6A18	0.637681	0.0217391	0.0340909	SLC6A18	0.624113	1.51648	0.0132743
SLC6A20	SLC6A20	0.404762	0.559524	0.0357143	SLC6A20	0.723404	0.0638298	0.0882353	SLC6A20	0.68	1.27027	0.037037
SLC6A20_ENST00000358525	SLC6A20_ENST00000358525	0.394444	0.572222	0.0333333	SLC6A20_ENST00000358525	0.68932	0.0582524	0.084507	SLC6A20_ENST00000358525	0.651376	1.33766	0.0344828
SLC7A10	SLC7A10	0.365517	0.565517	0.0689655	SLC7A10	0.646341	0.121951	0.188679	SLC7A10	0.576087	1.30159	0.0740741
SLC8A3					SLC8A3	0.59761	0.063745	0.106667	SLC8A3	0.561798	1.51205	0.0399002
SLC9A3	SLC9A3	0.386047	0.586047	0.027907	SLC9A3	0.65873	0.047619	0.0722892	SLC9A3	0.628788	1.41573	0.0287081
SLCO4A1	SLCO4A1	0.393204	0.597087	0.00970874	SLCO4A1	0.658537	0.0162602	0.0246914	SLCO4A1	0.648	1.48193	0.00980392
SLFN12	SLFN12	0.258993	0.582734	0.158273	SLFN12	0.444444	0.271605	0.611111
SLITRK1					SLITRK1	0.606811	0.0681115	0.112245	SLITRK1	0.568116	1.48165	0.0423892
SLITRK6	SLITRK6	0.138418	0.816384	0.0451977
SMAD2	SMAD2	0.05625	0.66875	0.275	SMAD2	0.0841121	0.411215	4.88889	SMAD2	0.0596026	2.01887	0.37931
SMAD2_ENST00000591214	SMAD2_ENST00000591214	0.0751174	0.732394	0.192488	SMAD2_ENST00000591214	0.102564	0.262821	2.5625	SMAD2_ENST00000591214	0.0812183	2.73684	0.238372
SMAD3	SMAD3	0.107937	0.796825	0.0952381
SMAD4	SMAD4	0.0243697	0.752941	0.222689	SMAD4	0.0323661	0.295759	9.13793	SMAD4	0.0249785	3.04762	0.286486
SMAD4_ENST00000452201	SMAD4_ENST00000452201	0.0629371	0.706294	0.230769	SMAD4_ENST00000452201	0.0891089	0.326733	3.66667	SMAD4_ENST00000452201	0.0671642	2.40476	0.3
SMAP1	SMAP1	0.217822	0.60396	0.178218	SMAP1	0.360656	0.295082	0.818182	SMAP1	0.278481	1.525	0.216867
SMARCA4	SMARCA4	0.110823	0.77316	0.116017
SMARCA4_ENST00000358026	SMARCA4_ENST00000358026	0.114206	0.786444	0.09935
SMARCB1	SMARCB1	0.0914826	0.608833	0.299685	SMARCB1	0.150259	0.492228	3.27586	SMARCB1	0.100694	1.55645	0.427928
SMARCD2	SMARCD2	0.17094	0.615385	0.213675	SMARCD2	0.277778	0.347222	1.25	SMARCD2	0.206186	1.6	0.271739
SMARCD2_ENST00000323347	SMARCD2_ENST00000323347	0.2	0.6	0.2	SMARCD2_ENST00000323347	0.333333	0.333333	1	SMARCD2_ENST00000323347	0.25	1.5	0.25
SMC1A	SMC1A	0.125	0.83871	0.0362903
SMC5	SMC5	0.111111	0.74537	0.143519
SMC6	SMC6	0.152381	0.67619	0.171429	SMC6	0.225352	0.253521	1.125	SMC6	0.179775	2.08824	0.206897
SMO	SMO	0.106443	0.812325	0.0812325
SNX8	SNX8	0.396825	0.571429	0.031746	SNX8	0.694444	0.0555556	0.08	SNX8	0.657895	1.33333	0.0327869
SOX1	SOX1	0.456897	0.543103	0	SOX1	0.84127	0	0	SOX1	0.84127	1.18868	0
SOX2	SOX2	0.147887	0.823944	0.028169
SOX9	SOX9	0.100629	0.600629	0.298742	SOX9	0.167539	0.497382	2.96875	SOX9	0.111888	1.50394	0.426009
SP140_ENST00000392045	SP140_ENST00000392045	0.233553	0.625	0.141447
SP3_ENST00000310015	SP3_ENST00000310015	0.384259	0.550926	0.0648148	SP3_ENST00000310015	0.697479	0.117647	0.168675	SP3_ENST00000310015	0.62406	1.2268	0.0693069
SPATA17	SPATA17	0.223022	0.625899	0.151079
SPATA20					SPATA20	0.609756	0.0731707	0.12	SPATA20	0.568182	1.46429	0.0454545
SPECC1_ENST00000261503	SPECC1_ENST00000261503	0.228873	0.623239	0.147887
SPNS3					SPNS3	0.602564	0.0897436	0.148936	SPNS3	0.552941	1.44444	0.056
SPOP	SPOP	0.0283688	0.940898	0.0307329	SPOP	0.0301508	0.0326633	1.08333	SPOP	0.0291971	15.92	0.0317073
SPRED1	SPRED1	0.160714	0.607143	0.232143	SPRED1	0.264706	0.382353	1.44444	SPRED1	0.191489	1.54545	0.302326
SPRYD5_ENST00000327733	SPRYD5_ENST00000327733	0.193676	0.644269	0.162055	SPRYD5_ENST00000327733	0.300613	0.251534	0.836735
SPTY2D1	SPTY2D1	0.185629	0.664671	0.149701
SRSF2	SRSF2	0.0620438	0.923358	0.0145985	SRSF2	0.0671937	0.0158103	0.235294	SRSF2	0.0661479	12.0476	0.0148148
SS18L1_ENST00000331758	SS18L1_ENST00000331758	0.363636	0.572727	0.0636364	SS18L1_ENST00000331758	0.634921	0.111111	0.175	SS18L1_ENST00000331758	0.571429	1.34043	0.0679612
SSTR5	SSTR5	0.390476	0.6	0.00952381	SSTR5	0.650794	0.015873	0.0243902	SSTR5	0.640625	1.5	0.00961538
SSX2IP_ENST00000370612	SSX2IP_ENST00000370612	0.119266	0.816514	0.0642202
SSX5	SSX5	0.131034	0.868966	0
ST3GAL1	ST3GAL1	0.367925	0.632075	0					ST3GAL1	0.58209	1.71795	0
ST8SIA5									ST8SIA5	0.56383	1.72222	0.00684932
STAG2	STAG2	0.0922401	0.642753	0.265007	STAG2	0.143508	0.412301	2.87302	STAG2	0.101613	1.79918	0.360558
STAG2_ENST00000218089	STAG2_ENST00000218089	0.0896226	0.66195	0.248428	STAG2_ENST00000218089	0.135392	0.375297	2.77193	STAG2_ENST00000218089	0.0984456	1.95814	0.330544
STAM2	STAM2	0.12963	0.824074	0.0462963
STAMBPL1	STAMBPL1	0.121951	0.560976	0.317073	STAMBPL1	0.217391	0.565217	2.6	STAMBPL1	0.138889	1.27778	0.464286
STAMBPL1_ENST00000371927	STAMBPL1_ENST00000371927	0.133858	0.551181	0.314961	STAMBPL1_ENST00000371927	0.242857	0.571429	2.35294	STAMBPL1_ENST00000371927	0.154545	1.22807	0.45977
STAT2	STAT2	0.307692	0.576923	0.115385
STAT5B	STAT5B	0.103704	0.774074	0.122222
STAU2	STAU2	0.174497	0.644295	0.181208	STAU2	0.270833	0.28125	1.03846	STAU2	0.211382	1.81132	0.221311
STAU2_ENST00000521210	STAU2_ENST00000521210	0.176471	0.632353	0.191176	STAU2_ENST00000521210	0.27907	0.302326	1.08333	STAU2_ENST00000521210	0.214286	1.72	0.236364
STAU2_ENST00000524300	STAU2_ENST00000524300	0.180645	0.645161	0.174194	STAU2_ENST00000524300	0.28	0.27	0.964286	STAU2_ENST00000524300	0.220472	1.81818	0.210938
STC2	STC2	0.367742	0.574194	0.0580645	STC2	0.640449	0.101124	0.157895	STC2	0.581633	1.34848	0.0616438
STEAP3_ENST00000393110									STEAP3_ENST00000393110	0.560976	1.61224	0.024
STEAP3_ENST00000409811	STEAP3_ENST00000409811	0.415094	0.556604	0.0283019	STEAP3_ENST00000409811	0.745763	0.0508475	0.0681818	STEAP3_ENST00000409811	0.709677	1.25532	0.0291262
STK11	STK11	0.0605428	0.592902	0.346555	STK11	0.102113	0.584507	5.72414	STK11	0.0644444	1.45641	0.530351
STK11_ENST00000326873	STK11_ENST00000326873	0.045977	0.626437	0.327586	STK11_ENST00000326873	0.0733945	0.522936	7.125	STK11_ENST00000326873	0.0481928	1.67692	0.487179
SUFU	SUFU	0.136646	0.819876	0.0434783
SUSD5	SUSD5	0.314103	0.583333	0.102564
SUZ12	SUZ12	0.075	0.82	0.105	SUZ12	0.0914634	0.128049	1.4	SUZ12	0.0810811	4.55556	0.117318
SYN1_ENST00000295987	SYN1_ENST00000295987	0.37037	0.607407	0.0222222	SYN1_ENST00000295987	0.609756	0.0365854	0.06	SYN1_ENST00000295987	0.588235	1.54717	0.0227273
SYT7	SYT7	0.386076	0.588608	0.0253165	SYT7	0.655914	0.0430108	0.0655738	SYT7	0.628866	1.43077	0.025974
TACR1	TACR1	0.358779	0.572519	0.0687023	TACR1	0.626667	0.12	0.191489	TACR1	0.559524	1.33929	0.0737705
TAF1	TAF1	0.120805	0.8434	0.0357942
TAF1_ENST00000276072	TAF1_ENST00000276072	0.127711	0.845783	0.026506
TAF1_ENST00000449580	TAF1_ENST00000449580	0.137838	0.832432	0.0297297
TAF1B	TAF1B	0.125984	0.622047	0.251969	TAF1B	0.202532	0.405063	2	TAF1B	0.144144	1.64583	0.336842
TAP2_ENST00000374897	TAP2_ENST00000374897	0.206349	0.579365	0.214286	TAP2_ENST00000374897	0.356164	0.369863	1.03846	TAP2_ENST00000374897	0.26	1.37736	0.272727
TAS2R1					TAS2R1	0.604651	0.0813953	0.134615	TAS2R1	0.55914	1.45763	0.0507246
TAS2R38									TAS2R38	0.552083	1.61404	0.0275862
TAS2R41	TAS2R41	0.323077	0.576923	0.1
TBC1D10C	TBC1D10C	0.251613	0.606452	0.141935
TBC1D23_ENST00000394144	TBC1D23_ENST00000394144	0.205674	0.588652	0.205674	TBC1D23_ENST00000394144	0.349398	0.349398	1	TBC1D23_ENST00000394144	0.258929	1.43103	0.258929
TBC1D24	TBC1D24	0.398649	0.560811	0.0405405	TBC1D24	0.710843	0.0722892	0.101695	TBC1D24	0.662921	1.27692	0.0422535
TBC1D2B_ENST00000300584	TBC1D2B_ENST00000300584	0.166667	0.818182	0.0151515
TBL1XR1	TBL1XR1	0.0909091	0.848485	0.0606061	TBL1XR1	0.107143	0.0714286	0.666667	TBL1XR1	0.1	5.6	0.0645161
TBP	TBP	0.573913	0.417391	0.00869565	TBP	1.375	0.0208333	0.0151515	TBP	1.34694	0.716418	0.00877193
TBR1	TBR1	0.394231	0.576923	0.0288462	TBR1	0.683333	0.05	0.0731707	TBR1	0.650794	1.36364	0.029703
TBRG4	TBRG4	0.153285	0.817518	0.0291971
TBX10	TBX10	0.373832	0.560748	0.0654206	TBX10	0.666667	0.116667	0.175	TBX10	0.597015	1.2766	0.07
TBX19	TBX19	0.368421	0.533835	0.0977444	TBX19	0.690141	0.183099	0.265306	TBX19	0.583333	1.14516	0.108333
TBX3	TBX3	0.114894	0.806383	0.0787234
TBXA2R	TBXA2R	0.394161	0.569343	0.0364964	TBXA2R	0.692308	0.0641026	0.0925926	TBXA2R	0.650602	1.32203	0.0378788
TBXA2R_ENST00000411851					TBXA2R_ENST00000411851	0.604396	0.0659341	0.109091	TBXA2R_ENST00000411851	0.56701	1.4918	0.0410959
TCEB3	TCEB3	0.169697	0.606061	0.224242	TCEB3	0.28	0.37	1.32143	TCEB3	0.20438	1.53846	0.289062
TCERG1	TCERG1	0.236162	0.601476	0.162362	TCERG1	0.392638	0.269939	0.6875
TCF12	TCF12	0.0779221	0.831169	0.0909091	TCF12	0.09375	0.109375	1.16667	TCF12	0.084507	4.92308	0.1
TCF12_ENST00000438423	TCF12_ENST00000438423	0.0791367	0.834532	0.0863309	TCF12_ENST00000438423	0.0948276	0.103448	1.09091	TCF12_ENST00000438423	0.0859375	5.04348	0.0944882
TCF12_ENST00000452095	TCF12_ENST00000452095	0.0785714	0.842857	0.0785714	TCF12_ENST00000452095	0.0932203	0.0932203	1	TCF12_ENST00000452095	0.0852713	5.36364	0.0852713
TCF25_ENST00000263347	TCF25_ENST00000263347	0.302752	0.577982	0.119266
TCF7L2	TCF7L2	0.138021	0.609375	0.252604	TCF7L2	0.226496	0.41453	1.83019	TCF7L2	0.160121	1.56	0.337979
TCF7L2_ENST00000352065	TCF7L2_ENST00000352065	0.0943396	0.698113	0.207547	TCF7L2_ENST00000352065	0.135135	0.297297	2.2	TCF7L2_ENST00000352065	0.104167	2.3125	0.261905
TCF7L2_ENST00000355717	TCF7L2_ENST00000355717	0.129477	0.545455	0.325069	TCF7L2_ENST00000355717	0.237374	0.59596	2.51064	TCF7L2_ENST00000355717	0.148734	1.2	0.481633
TCF7L2_ENST00000543371	TCF7L2_ENST00000543371	0.121655	0.632603	0.245742	TCF7L2_ENST00000543371	0.192308	0.388462	2.02	TCF7L2_ENST00000543371	0.138504	1.72185	0.325806
TCHP	TCHP	0.110092	0.743119	0.146789
TEAD2	TEAD2	0.234483	0.551724	0.213793	TEAD2	0.425	0.3875	0.911765	TEAD2	0.306306	1.23077	0.27193
TET2	TET2	0.0451362	0.561868	0.392996	TET2	0.0803324	0.699446	8.7069	TET2	0.0472698	1.28242	0.647436
TET2_ENST00000305737	TET2_ENST00000305737	0.0695489	0.545113	0.385338	TET2_ENST00000305737	0.127586	0.706897	5.54054	TET2_ENST00000305737	0.0747475	1.19835	0.626911
TEX11	TEX11	0.218274	0.634518	0.147208
TFAP2D					TFAP2D	0.594286	0.0514286	0.0865385	TFAP2D	0.565217	1.54867	0.0322581
TFE3_ENST00000336239	TFE3_ENST00000336239	0.205128	0.602564	0.192308	TFE3_ENST00000336239	0.340426	0.319149	0.9375	TFE3_ENST00000336239	0.258065	1.51613	0.238095
TGFBR1	TGFBR1	0.062069	0.796552	0.141379	TGFBR1	0.0779221	0.177489	2.27778	TGFBR1	0.0661765	3.91525	0.164659
TGFBR2	TGFBR2	0.0631808	0.769063	0.167756	TGFBR2	0.082153	0.21813	2.65517	TGFBR2	0.0674419	3.33019	0.201571
TGFBR2_ENST00000359013	TGFBR2_ENST00000359013	0.0596659	0.785203	0.155131	TGFBR2_ENST00000359013	0.0759878	0.197568	2.6	TGFBR2_ENST00000359013	0.0634518	3.65556	0.183616
TGIF1	TGIF1	0.147826	0.643478	0.208696	TGIF1	0.22973	0.324324	1.41176	TGIF1	0.173469	1.80488	0.263736
TGIF2LX	TGIF2LX	0.357724	0.585366	0.0569106	TGIF2LX	0.611111	0.0972222	0.159091	TGIF2LX	0.556962	1.41176	0.0603448
THBD	THBD	0.390071	0.588652	0.0212766	THBD	0.662651	0.0361446	0.0545455	THBD	0.639535	1.43103	0.0217391
THOC2	THOC2	0.145897	0.817629	0.0364742
TJAP1	TJAP1	0.169643	0.821429	0.00892857
TJAP1_ENST00000372445	TJAP1_ENST00000372445	0.168317	0.821782	0.00990099
TM9SF3	TM9SF3	0.165217	0.6	0.234783	TM9SF3	0.275362	0.391304	1.42105	TM9SF3	0.197917	1.5	0.306818
TMEM130	TMEM130	0.4	0.571429	0.0285714	TMEM130	0.7	0.05	0.0714286	TMEM130	0.666667	1.33333	0.0294118
TMEM161B	TMEM161B	0.151261	0.815126	0.0336134
TMEM214					TMEM214	0.592105	0.0526316	0.0888889	TMEM214	0.5625	1.55102	0.0330579
TMEM232_ENST00000455884	TMEM232_ENST00000455884	0.156522	0.695652	0.147826
TMEM79	TMEM79	0.405172	0.551724	0.0431034	TMEM79	0.734375	0.078125	0.106383	TMEM79	0.681159	1.23077	0.045045
TMPO	TMPO	0.117647	0.647059	0.235294	TMPO	0.181818	0.363636	2	TMPO	0.133333	1.83333	0.307692
TMPO_ENST00000266732	TMPO_ENST00000266732	0.134921	0.706349	0.15873
TMTC3	TMTC3	0.109091	0.793939	0.0969697
TNFRSF14_ENST00000355716	TNFRSF14_ENST00000355716	0.105769	0.769231	0.125
TNK1					TNK1	0.587302	0.031746	0.0540541	TNK1	0.569231	1.61538	0.02
TNPO1	TNPO1	0.136095	0.680473	0.183432	TNPO1	0.2	0.269565	1.34783	TNPO1	0.157534	2.12963	0.224638
TNRC6B_ENST00000301923	TNRC6B_ENST00000301923	0.259574	0.591489	0.148936	TNRC6B_ENST00000301923	0.438849	0.251799	0.57377
TNRC6B_ENST00000454349	TNRC6B_ENST00000454349	0.275934	0.568465	0.155602	TNRC6B_ENST00000454349	0.485401	0.273723	0.56391
TP53	TP53	0.0105812	0.787993	0.201426	TP53	0.013428	0.255619	19.0362	TP53	0.0106944	3.71682	0.252232
TP53_ENST00000269305	TP53_ENST00000269305	0.0102993	0.792342	0.197359	TP53_ENST00000269305	0.0129986	0.249083	19.1624	TP53_ENST00000269305	0.0104065	3.8156	0.245887
TP53_ENST00000413465	TP53_ENST00000413465	0.0105061	0.807431	0.182063	TP53_ENST00000413465	0.0130117	0.225484	17.3293	TP53_ENST00000413465	0.0106176	4.19295	0.222588
TP53_ENST00000414315	TP53_ENST00000414315	0.00449214	0.766908	0.2286	TP53_ENST00000414315	0.00585747	0.29808	50.8889	TP53_ENST00000414315	0.00451241	3.29015	0.296344
TP53_ENST00000420246	TP53_ENST00000420246	0.0125354	0.827335	0.160129	TP53_ENST00000420246	0.0151515	0.193548	12.7742	TP53_ENST00000420246	0.0126945	4.79157	0.19066
TP53_ENST00000455263	TP53_ENST00000455263	0.0113547	0.826644	0.162001	TP53_ENST00000455263	0.0137359	0.195974	14.2672	TP53_ENST00000455263	0.0114851	4.76849	0.193319
TP53_ENST00000545858	TP53_ENST00000545858	0.00463447	0.840783	0.154582	TP53_ENST00000545858	0.00551209	0.183855	33.3548	TP53_ENST00000545858	0.00465605	5.28075	0.182847
TP73	TP73	0.320225	0.567416	0.11236
TP73_ENST00000378288	TP73_ENST00000378288	0.33758	0.55414	0.10828	TP73_ENST00000378288	0.609195	0.195402	0.320755
TRAF7	TRAF7	0.106796	0.857605	0.0355987
TRAFD1	TRAFD1	0.12	0.85	0.03
TRAM1L1	TRAM1L1	0.17931	0.641379	0.17931	TRAM1L1	0.27957	0.27957	1	TRAM1L1	0.218487	1.78846	0.218487
TRDN	TRDN	0.0840336	0.781513	0.134454	TRDN	0.107527	0.172043	1.6	TRDN	0.0917431	3.57692	0.15534
TREML2	TREML2	0.364964	0.59854	0.0364964	TREML2	0.609756	0.0609756	0.1	TREML2	0.574713	1.49091	0.0378788
TRIB2	TRIB2	0.386139	0.60396	0.00990099	TRIB2	0.639344	0.0163934	0.025641	TRIB2	0.629032	1.525	0.01
TRIM17_ENST00000456946	TRIM17_ENST00000456946	0.320388	0.543689	0.135922	TRIM17_ENST00000456946	0.589286	0.25	0.424242
TRIM22	TRIM22	0.228814	0.618644	0.152542	TRIM22	0.369863	0.246575	0.666667
TRIM23	TRIM23	0.12844	0.834862	0.0366972
TRIM48	TRIM48	0.157895	0.837719	0.00438596
TRIM48_ENST00000417545	TRIM48_ENST00000417545	0.155844	0.835498	0.00865801
TRIM50	TRIM50	0.410853	0.550388	0.0387597	TRIM50	0.746479	0.0704225	0.0943396	TRIM50	0.697368	1.22414	0.0403226
TRIM50_ENST00000333149	TRIM50_ENST00000333149	0.409449	0.551181	0.0393701	TRIM50_ENST00000333149	0.742857	0.0714286	0.0961538	TRIM50_ENST00000333149	0.693333	1.22807	0.0409836
TRIO_ENST00000344135					TRIO_ENST00000344135	0.597561	0.0609756	0.102041	TRIO_ENST00000344135	0.563218	1.51852	0.0381679
TROAP	TROAP	0.115789	0.857895	0.0263158
TRPV1_ENST00000174621	TRPV1_ENST00000174621	0.372671	0.57764	0.0496894	TRPV1_ENST00000174621	0.645161	0.0860215	0.133333	TRPV1_ENST00000174621	0.594059	1.36765	0.0522876
TRPV1_ENST00000399756					TRPV1_ENST00000399756	0.591837	0.0918367	0.155172
TRPV4	TRPV4	0.3875	0.583333	0.0291667	TRPV4	0.664286	0.05	0.0752688	TRPV4	0.632653	1.4	0.0300429
TSC1	TSC1	0.15251	0.648649	0.198842	TSC1	0.235119	0.306548	1.3038	TSC1	0.179954	1.84615	0.248193
TSC1_ENST00000403810	TSC1_ENST00000403810	0.0985915	0.697183	0.204225	TSC1_ENST00000403810	0.141414	0.292929	2.07143	TSC1_ENST00000403810	0.109375	2.30233	0.256637
TSC22D2					TSC22D2	0.597561	0.0609756	0.102041	TSC22D2	0.563218	1.51852	0.0381679
TSHR	TSHR	0.124197	0.850107	0.0256959
TSSK6	TSSK6	0.411765	0.54902	0.0392157	TSSK6	0.75	0.0714286	0.0952381	TSSK6	0.7	1.21739	0.0408163
TTC3_ENST00000540756	TTC3_ENST00000540756	0.142857	0.815126	0.0420168
TTK	TTK	0.133333	0.595833	0.270833	TTK	0.223776	0.454545	2.03125	TTK	0.153846	1.47423	0.371429
TTK_ENST00000369798	TTK_ENST00000369798	0.139013	0.627803	0.233184	TTK_ENST00000369798	0.221429	0.371429	1.67742	TTK_ENST00000369798	0.161458	1.68675	0.304094
TTLL10	TTLL10	0.230769	0.598291	0.17094	TTLL10	0.385714	0.285714	0.740741	TTLL10	0.3	1.48936	0.206186
TTLL8									TTLL8	0.554054	1.61364	0.0267857
TTLL8_ENST00000440475									TTLL8_ENST00000440475	0.565217	1.63415	0.0188679
TUBB4	TUBB4	0.373913	0.578261	0.0478261	TUBB4	0.646617	0.0827068	0.127907	TUBB4	0.597222	1.37113	0.0502283
TUBD1	TUBD1	0.116505	0.786408	0.0970874
TXLNA	TXLNA	0.114035	0.842105	0.0438596
TXNRD1_ENST00000525566	TXNRD1_ENST00000525566	0.12844	0.825688	0.0458716
U2AF1	U2AF1	0.0534125	0.931751	0.0148368	U2AF1	0.0573248	0.0159236	0.277778	U2AF1	0.0564263	13.6522	0.0150602
U2AF1_ENST00000380276	U2AF1_ENST00000380276	0.0685921	0.913357	0.0180505	U2AF1_ENST00000380276	0.0750988	0.0197628	0.263158	U2AF1_ENST00000380276	0.0736434	10.5417	0.0183824
U2AF2	U2AF2	0.147059	0.816176	0.0367647
U2SURP	U2SURP	0.116751	0.827411	0.0558376
UBC	UBC	0.507042	0.460094	0.0328638	UBC	1.10204	0.0714286	0.0648148	UBC	1.02857	0.852174	0.0339806
UBQLN2	UBQLN2	0.203008	0.631579	0.165414	UBQLN2	0.321429	0.261905	0.814815
UBR5	UBR5	0.201754	0.653509	0.144737
UPF3A	UPF3A	0.335878	0.51145	0.152672	UPF3A	0.656716	0.298507	0.454545
UPF3B	UPF3B	0.0916667	0.766667	0.141667					UPF3B	0.100917	3.28571	0.165049
USO1_ENST00000538159	USO1_ENST00000538159	0.116279	0.806202	0.0775194
USP28	USP28	0.14094	0.697987	0.161074
USP35_ENST00000263311	USP35_ENST00000263311	0.25	0.595833	0.154167	USP35_ENST00000263311	0.41958	0.258741	0.616667
USP43	USP43	0.184502	0.664207	0.151292
USP45	USP45	0.134752	0.659574	0.205674	USP45	0.204301	0.311828	1.52632	USP45	0.155738	1.9375	0.258929
USP8	USP8	0.121849	0.831933	0.0462185
VHL	VHL	0.0357143	0.568452	0.395833	VHL	0.0628272	0.696335	11.0833	VHL	0.037037	1.31724	0.655172
VIPAR	VIPAR	0.316239	0.581197	0.102564
VIPR1	VIPR1	0.37037	0.601852	0.0277778	VIPR1	0.615385	0.0461538	0.075	VIPR1	0.588235	1.51163	0.0285714
VSIG1					VSIG1	0.585714	0.0428571	0.0731707	VSIG1	0.561644	1.59091	0.027027
VSIG1_ENST00000415430	VSIG1_ENST00000415430	0.373913	0.6	0.026087	VSIG1_ENST00000415430	0.623188	0.0434783	0.0697674	VSIG1_ENST00000415430	0.597222	1.5	0.0267857
VSIG1_ENST00000444426					VSIG1_ENST00000444426	0.589041	0.0410959	0.0697674	VSIG1_ENST00000444426	0.565789	1.58696	0.0258621
VWC2L	VWC2L	0.140496	0.826446	0.0330579
WAC	WAC	0.301775	0.585799	0.112426
WDR18					WDR18	0.591549	0.0422535	0.0714286	WDR18	0.567568	1.57778	0.0265487
WDR20_ENST00000454394	WDR20_ENST00000454394	0.357798	0.577982	0.0642202	WDR20_ENST00000454394	0.619048	0.111111	0.179487	WDR20_ENST00000454394	0.557143	1.36957	0.0686275
WDR47	WDR47	0.146893	0.677966	0.175141	WDR47	0.216667	0.258333	1.19231	WDR47	0.172185	2.10526	0.212329
WDR47_ENST00000400794	WDR47_ENST00000400794	0.146341	0.707317	0.146341
WNT16	WNT16	0.149123	0.535088	0.315789	WNT16	0.278689	0.590164	2.11765	WNT16	0.175258	1.15094	0.461538
WNT16_ENST00000361301	WNT16_ENST00000361301	0.152381	0.580952	0.266667	WNT16_ENST00000361301	0.262295	0.459016	1.75	WNT16_ENST00000361301	0.179775	1.38636	0.363636
WNT5B_ENST00000397196	WNT5B_ENST00000397196	0.369369	0.576577	0.0540541	WNT5B_ENST00000397196	0.640625	0.09375	0.146341	WNT5B_ENST00000397196	0.585714	1.3617	0.0571429
WNT9B					WNT9B	0.584615	0.0769231	0.131579
WRAP53	WRAP53	0.300971	0.582524	0.116505
WT1	WT1	0.0997625	0.657957	0.24228	WT1	0.151625	0.368231	2.42857	WT1	0.110818	1.92361	0.319749
WT1_ENST00000332351	WT1_ENST00000332351	0.103152	0.719198	0.17765	WT1_ENST00000332351	0.143426	0.247012	1.72222	WT1_ENST00000332351	0.115016	2.56122	0.216028
WT1_ENST00000379079	WT1_ENST00000379079	0.1	0.703704	0.196296	WT1_ENST00000379079	0.142105	0.278947	1.96296	WT1_ENST00000379079	0.111111	2.375	0.24424
XPO1	XPO1	0.121387	0.84104	0.0375723
XPOT	XPOT	0.273438	0.574219	0.152344	XPOT	0.47619	0.265306	0.557143
XRN1	XRN1	0.110063	0.77673	0.113208
XYLT2	XYLT2	0.164502	0.528139	0.307359	XYLT2	0.311475	0.581967	1.86842	XYLT2	0.196891	1.11927	0.44375
YAP1	YAP1	0.0887097	0.862903	0.0483871	YAP1	0.102804	0.0560748	0.545455	YAP1	0.0973451	6.29412	0.0508475
YAP1_ENST00000282441	YAP1_ENST00000282441	0.0915033	0.869281	0.0392157	YAP1_ENST00000282441	0.105263	0.0451128	0.428571	YAP1_ENST00000282441	0.100719	6.65	0.0408163
YES1	YES1	0.0971429	0.822857	0.08	YES1	0.118056	0.0972222	0.823529
YLPM1	YLPM1	0.179138	0.632653	0.188209	YLPM1	0.283154	0.297491	1.05063	YLPM1	0.218232	1.72222	0.231844
YLPM1_ENST00000325680	YLPM1_ENST00000325680	0.184158	0.637624	0.178218	YLPM1_ENST00000325680	0.28882	0.279503	0.967742	YLPM1_ENST00000325680	0.225728	1.75956	0.216867
YTHDF3	YTHDF3	0.585034	0.387755	0.0272109	YTHDF3	1.50877	0.0701754	0.0465116	YTHDF3	1.40984	0.633333	0.027972
ZAN_ENST00000546213	ZAN_ENST00000546213	0.366906	0.607914	0.0251799	ZAN_ENST00000546213	0.60355	0.0414201	0.0686275	ZAN_ENST00000546213	0.579545	1.55046	0.0258303
ZBTB26	ZBTB26	0.510949	0.474453	0.0145985	ZBTB26	1.07692	0.0307692	0.0285714	ZBTB26	1.04478	0.902778	0.0148148
ZC3H13	ZC3H13	0.135857	0.69265	0.171492	ZC3H13	0.196141	0.247588	1.2623	ZC3H13	0.157216	2.25362	0.206989
ZC3H13_ENST00000242848	ZC3H13_ENST00000242848	0.140187	0.71028	0.149533
ZC3H18	ZC3H18	0.217557	0.549618	0.232824	ZC3H18	0.395833	0.423611	1.07018	ZC3H18	0.278049	1.22034	0.303483
ZDHHC7_ENST00000564466	ZDHHC7_ENST00000564466	0.277228	0.564356	0.158416	ZDHHC7_ENST00000564466	0.491228	0.280702	0.571429
ZDHHC8	ZDHHC8	0.248927	0.532189	0.218884	ZDHHC8	0.467742	0.41129	0.87931	ZDHHC8	0.331429	1.13761	0.28022
ZDHHC8_ENST00000405930	ZDHHC8_ENST00000405930	0.231481	0.583333	0.185185	ZDHHC8_ENST00000405930	0.396825	0.31746	0.8	ZDHHC8_ENST00000405930	0.301205	1.4	0.227273
ZFP2	ZFP2	0.120805	0.825503	0.0536913
ZFP36L2	ZFP36L2	0.0990991	0.698198	0.202703	ZFP36L2	0.141935	0.290323	2.04545	ZFP36L2	0.11	2.31343	0.254237
ZFP37	ZFP37	0.135417	0.677083	0.1875	ZFP37	0.2	0.276923	1.38462	ZFP37	0.156627	2.09677	0.230769
ZMYM3	ZMYM3	0.197059	0.655882	0.147059
ZNF135	ZNF135	0.388889	0.532407	0.0787037	ZNF135	0.730435	0.147826	0.202381	ZNF135	0.636364	1.13861	0.0854271
ZNF135_ENST00000401053	ZNF135_ENST00000401053	0.384259	0.537037	0.0787037	ZNF135_ENST00000401053	0.715517	0.146552	0.204819	ZNF135_ENST00000401053	0.62406	1.16	0.0854271
ZNF14	ZNF14	0.144444	0.644444	0.211111	ZNF14	0.224138	0.327586	1.46154	ZNF14	0.168831	1.8125	0.267606
ZNF207	ZNF207	0.0490196	0.843137	0.107843	ZNF207	0.0581395	0.127907	2.2	ZNF207	0.0515464	5.375	0.120879
ZNF224					ZNF224	0.597701	0.0804598	0.134615	ZNF224	0.553191	1.47458	0.0503597
ZNF233	ZNF233	0.192308	0.50641	0.301282	ZNF233	0.379747	0.594937	1.56667	ZNF233	0.238095	1.02597	0.431193
ZNF238	ZNF238	0.337838	0.560811	0.101351	ZNF238	0.60241	0.180723	0.3
ZNF238_ENST00000358704	ZNF238_ENST00000358704	0.347518	0.553191	0.0992908	ZNF238_ENST00000358704	0.628205	0.179487	0.285714
ZNF276	ZNF276	0.22695	0.539007	0.234043	ZNF276	0.421053	0.434211	1.03125	ZNF276	0.293578	1.16923	0.305556
ZNF276_ENST00000443381	ZNF276_ENST00000443381	0.209459	0.567568	0.222973	ZNF276_ENST00000443381	0.369048	0.392857	1.06452	ZNF276_ENST00000443381	0.264957	1.3125	0.286957
ZNF292	ZNF292	0.154489	0.686848	0.158664
ZNF292_ENST00000369577	ZNF292_ENST00000369577	0.158635	0.678715	0.162651
ZNF319	ZNF319	0.43662	0.542254	0.0211268	ZNF319	0.805195	0.038961	0.0483871	ZNF319	0.775	1.18462	0.0215827
ZNF34	ZNF34	0.306569	0.583942	0.109489
ZNF354B	ZNF354B	0.12844	0.834862	0.0366972
ZNF365	ZNF365	0.270677	0.571429	0.157895	ZNF365	0.473684	0.276316	0.583333
ZNF384_ENST00000361959	ZNF384_ENST00000361959	0.488636	0.471591	0.0397727	ZNF384_ENST00000361959	1.03614	0.0843373	0.0813953	ZNF384_ENST00000361959	0.955556	0.892473	0.0414201
ZNF503	ZNF503	0.394495	0.587156	0.0183486	ZNF503	0.671875	0.03125	0.0465116	ZNF503	0.651515	1.42222	0.0186916
ZNF517	ZNF517	0.4	0.6	0	ZNF517	0.666667	0	0	ZNF517	0.666667	1.5	0
ZNF548_ENST00000336128	ZNF548_ENST00000336128	0.264	0.592	0.144
ZNF563	ZNF563	0.194118	0.647059	0.158824	ZNF563	0.3	0.245455	0.818182
ZNF629	ZNF629	0.4	0.572727	0.0272727	ZNF629	0.698413	0.047619	0.0681818	ZNF629	0.666667	1.34043	0.0280374
ZNF649	ZNF649	0.174242	0.818182	0.00757576
ZNF71					ZNF71	0.614286	0.0714286	0.116279	ZNF71	0.573333	1.45833	0.0442478
ZNF711	ZNF711	0.102679	0.830357	0.0669643
ZNF711_ENST00000373165	ZNF711_ENST00000373165	0.116071	0.816964	0.0669643
ZNF730	ZNF730	0.371212	0.613636	0.0151515	ZNF730	0.604938	0.0246914	0.0408163	ZNF730	0.590361	1.58824	0.0153846
ZNF750	ZNF750	0.204167	0.595833	0.2	ZNF750	0.342657	0.335664	0.979592	ZNF750	0.256545	1.47423	0.25
ZNF813	ZNF813	0.37013	0.61039	0.0194805	ZNF813	0.606383	0.0319149	0.0526316	ZNF813	0.587629	1.56667	0.0198675
ZNF844	ZNF844	0.106383	0.868085	0.0255319
ZNF880	ZNF880	0.292683	0.560976	0.146341	ZNF880	0.521739	0.26087	0.5
ZNF92	ZNF92	0.438053	0.539823	0.0221239	ZNF92	0.811475	0.0409836	0.0505051	ZNF92	0.779528	1.17308	0.0226244
ZNRF4	ZNRF4	0.389163	0.576355	0.0344828	ZNRF4	0.675214	0.0598291	0.0886076	ZNRF4	0.637097	1.36047	0.0357143
ZRSR2	ZRSR2	0.10303	0.69697	0.2	ZRSR2	0.147826	0.286957	1.94118	ZRSR2	0.114865	2.3	0.25
ZSCAN2									ZSCAN2	0.554054	1.67442	0.0176991

## Sheet: CG_SO_SSI list
Genes symbol (combined list: 1457)	fS	fM	fN	rSM	rNM	rNS	rSMN	rMSN	rNSM	indel_fS	indel_fM	indel_fN	indel_rSM	indel_rNM	indel_rNS	indel_rSMN	indel_rMSN	indel_rNSM
AAAS	0.22	0.68	0.1	0.323529	0.147059	0.454545	0.282051	2.125	0.111111	0.209524	0.647619	0.142857	0.323529	0.220588	0.681818	0.26506	1.83784	0.166667
AASDH	0.189655	0.724138	0.0862069	0.261905	0.119048	0.454545	0.234043	2.625	0.0943396	0.170984	0.65285	0.176166	0.261905	0.269841	1.0303	0.20625	1.8806	0.213836
AASDH_ENST00000502617	0.151079	0.755396	0.0935252	0.2	0.12381	0.619048	0.177966	3.08824	0.103175	0.134615	0.673077	0.192308	0.2	0.285714	1.42857	0.155556	2.05882	0.238095
ABCB8_ENST00000356058	0.37	0.6	0.03	0.616667	0.05	0.0810811	0.587302	1.5	0.0309278	0.359223	0.582524	0.0582524	0.616667	0.1	0.162162	0.560606	1.39535	0.0618557
ABCG8	0.374429	0.584475	0.0410959	0.640625	0.0703125	0.109756	0.59854	1.40659	0.0428571	0.374429	0.584475	0.0410959	0.640625	0.0703125	0.109756	0.59854	1.40659	0.0428571
ABLIM1_ENST00000392952	0.13	0.82	0.05	0.158537	0.0609756	0.384615	0.149425	4.55556	0.0526316	0.13	0.82	0.05	0.158537	0.0609756	0.384615	0.149425	4.55556	0.0526316
ACAP2	0.208333	0.659722	0.131944	0.315789	0.2	0.633333	0.263158	1.93878	0.152	0.206897	0.655172	0.137931	0.315789	0.210526	0.666667	0.26087	1.9	0.16
ACBD3	0.227723	0.673267	0.0990099	0.338235	0.147059	0.434783	0.294872	2.06061	0.10989	0.214953	0.635514	0.149533	0.338235	0.235294	0.695652	0.27381	1.74359	0.175824
ACCN5	0.16129	0.819355	0.0193548	0.19685	0.023622	0.12	0.192308	4.53571	0.0197368	0.16129	0.819355	0.0193548	0.19685	0.023622	0.12	0.192308	4.53571	0.0197368
ACKR3	0.369048	0.619048	0.0119048	0.596154	0.0192308	0.0322581	0.584906	1.625	0.0120482	0.369048	0.619048	0.0119048	0.596154	0.0192308	0.0322581	0.584906	1.625	0.0120482
ACRBP	0.335938	0.578125	0.0859375	0.581081	0.148649	0.255814	0.505882	1.37037	0.0940171	0.335938	0.578125	0.0859375	0.581081	0.148649	0.255814	0.505882	1.37037	0.0940171
ACTA1	0.370861	0.615894	0.013245	0.602151	0.0215054	0.0357143	0.589474	1.60345	0.0134228	0.368421	0.611842	0.0197368	0.602151	0.0322581	0.0535714	0.583333	1.57627	0.0201342
ACTL6B	0.31405	0.61157	0.0743802	0.513514	0.121622	0.236842	0.457831	1.57447	0.0803571	0.299213	0.582677	0.11811	0.513514	0.202703	0.394737	0.426966	1.39623	0.133929
ACTL9	0.364017	0.623431	0.0125523	0.583893	0.0201342	0.0344828	0.572368	1.65556	0.0127119	0.3625	0.620833	0.0166667	0.583893	0.0268456	0.045977	0.568627	1.63736	0.0169492
ACVR1B	0.114754	0.797814	0.0874317	0.143836	0.109589	0.761905	0.12963	3.94595	0.0958084	0.111702	0.776596	0.111702	0.143836	0.143836	1	0.125749	3.47619	0.125749
ACVR1B_ENST00000541224	0.104803	0.742358	0.152838	0.141176	0.205882	1.45833	0.117073	2.88136	0.180412	0.102564	0.726496	0.17094	0.141176	0.235294	1.66667	0.114286	2.65625	0.206186
ACVR2A	0.126582	0.687764	0.185654	0.184049	0.269939	1.46667	0.144928	2.2027	0.227979	0.0663717	0.360619	0.573009	0.184049	1.58896	8.63333	0.07109	0.564014	1.34197
ADAM10	0.153846	0.825175	0.020979	0.186441	0.0254237	0.136364	0.181818	4.72	0.0214286	0.150685	0.808219	0.0410959	0.186441	0.0508475	0.272727	0.177419	4.21429	0.0428571
ADD1_ENST00000398125	0.352459	0.598361	0.0491803	0.589041	0.0821918	0.139535	0.544304	1.4898	0.0517241	0.352459	0.598361	0.0491803	0.589041	0.0821918	0.139535	0.544304	1.4898	0.0517241
ADD3	0.222222	0.728395	0.0493827	0.305085	0.0677966	0.222222	0.285714	2.68182	0.0519481	0.195652	0.641304	0.163043	0.305085	0.254237	0.833333	0.243243	1.78788	0.194805
ADNP	0.189815	0.736111	0.0740741	0.257862	0.100629	0.390244	0.234286	2.78947	0.08	0.171548	0.665272	0.16318	0.257862	0.245283	0.95122	0.207071	1.9875	0.195
ADRA1A_ENST00000358857	0.368852	0.581967	0.0491803	0.633803	0.084507	0.133333	0.584416	1.39216	0.0517241	0.368852	0.581967	0.0491803	0.633803	0.084507	0.133333	0.584416	1.39216	0.0517241
ADRA1A_ENST00000380572	0.366667	0.591667	0.0416667	0.619718	0.0704225	0.113636	0.578947	1.44898	0.0434783	0.366667	0.591667	0.0416667	0.619718	0.0704225	0.113636	0.578947	1.44898	0.0434783
ADRA1B	0.422018	0.577982	0	0.730159	0	0	0.730159	1.36957	0	0.422018	0.577982	0	0.730159	0	0	0.730159	1.36957	0
AFP	0.14876	0.826446	0.0247934	0.18	0.03	0.166667	0.174757	4.7619	0.0254237	0.147541	0.819672	0.0327869	0.18	0.04	0.222222	0.173077	4.54545	0.0338983
AGAP6	0.117117	0.81982	0.0630631	0.142857	0.0769231	0.538462	0.132653	4.55	0.0673077	0.117117	0.81982	0.0630631	0.142857	0.0769231	0.538462	0.132653	4.55	0.0673077
AGBL3	0.0944882	0.732283	0.173228	0.129032	0.236559	1.83333	0.104348	2.73529	0.209524	0.0944882	0.732283	0.173228	0.129032	0.236559	1.83333	0.104348	2.73529	0.209524
AGBL3_ENST00000458078	0.103448	0.724138	0.172414	0.142857	0.238095	1.66667	0.115385	2.625	0.208333	0.103448	0.724138	0.172414	0.142857	0.238095	1.66667	0.115385	2.625	0.208333
AGT	0.348684	0.605263	0.0460526	0.576087	0.076087	0.132075	0.535354	1.53333	0.0482759	0.323171	0.560976	0.115854	0.576087	0.206522	0.358491	0.477477	1.27778	0.131034
AGTPBP1_ENST00000376109	0.0840336	0.823529	0.092437	0.102041	0.112245	1.1	0.0917431	4.66667	0.101852	0.0840336	0.823529	0.092437	0.102041	0.112245	1.1	0.0917431	4.66667	0.101852
AHCTF1	0.196078	0.691176	0.112745	0.283688	0.163121	0.575	0.243902	2.2381	0.127072	0.194647	0.686131	0.119221	0.283688	0.173759	0.6125	0.241692	2.18605	0.135359
AHCTF1_ENST00000326225	0.174825	0.685315	0.13986	0.255102	0.204082	0.8	0.211864	2.17778	0.162602	0.174825	0.685315	0.13986	0.255102	0.204082	0.8	0.211864	2.17778	0.162602
AIM2	0.137615	0.779817	0.0825688	0.176471	0.105882	0.6	0.159574	3.54167	0.09	0.119048	0.674603	0.206349	0.176471	0.305882	1.73333	0.135135	2.07317	0.26
AKAP7										0.13913	0.408696	0.452174	0.340426	1.10638	3.25	0.161616	0.691176	0.825397
AKT1	0.0667976	0.923379	0.00982318	0.0723404	0.0106383	0.147059	0.0715789	12.0513	0.00992063	0.0667976	0.923379	0.00982318	0.0723404	0.0106383	0.147059	0.0715789	12.0513	0.00992063
ALK	0.141423	0.82208	0.0364964	0.172031	0.0443951	0.258065	0.164718	4.62051	0.0378788	0.140781	0.818347	0.0408719	0.172031	0.0499445	0.290323	0.163848	4.505	0.0426136
ALPL	0.364641	0.61326	0.0220994	0.594595	0.036036	0.0606061	0.573913	1.58571	0.0225989	0.362637	0.60989	0.0274725	0.594595	0.045045	0.0757576	0.568966	1.56338	0.0282486
ALX4	0.273333	0.66	0.0666667	0.414141	0.10101	0.243902	0.376147	1.94118	0.0714286	0.244048	0.589286	0.166667	0.414141	0.282828	0.682927	0.322835	1.43478	0.2
AMDHD2_ENST00000413459	0.359223	0.601942	0.038835	0.596774	0.0645161	0.108108	0.560606	1.5122	0.040404	0.359223	0.601942	0.038835	0.596774	0.0645161	0.108108	0.560606	1.5122	0.040404
AMER1	0.0856611	0.582868	0.331471	0.146965	0.56869	3.86957	0.0936864	1.39732	0.495822	0.0836364	0.569091	0.347273	0.146965	0.610224	4.15217	0.0912698	1.32068	0.532033
AMIGO3	0.392405	0.588608	0.0189873	0.666667	0.0322581	0.0483871	0.645833	1.43077	0.0193548	0.392405	0.588608	0.0189873	0.666667	0.0322581	0.0483871	0.645833	1.43077	0.0193548
ANGPTL2	0.363636	0.553719	0.0826446	0.656716	0.149254	0.227273	0.571429	1.24074	0.0900901	0.357724	0.544715	0.097561	0.656716	0.179104	0.272727	0.556962	1.19643	0.108108
ANKMY1_ENST00000361678	0.350282	0.587571	0.0621469	0.596154	0.105769	0.177419	0.53913	1.42466	0.0662651	0.350282	0.587571	0.0621469	0.596154	0.105769	0.177419	0.53913	1.42466	0.0662651
ANKMY1_ENST00000405523	0.379845	0.542636	0.0775194	0.7	0.142857	0.204082	0.6125	1.18644	0.0840336	0.379845	0.542636	0.0775194	0.7	0.142857	0.204082	0.6125	1.18644	0.0840336
ANKRD31_ENST00000274361	0.10989	0.802198	0.0879121	0.136986	0.109589	0.8	0.123457	4.05556	0.0963855	0.107527	0.784946	0.107527	0.136986	0.136986	1	0.120482	3.65	0.120482
ANKRD33	0.349593	0.593496	0.0569106	0.589041	0.0958904	0.162791	0.5375	1.46	0.0603448	0.346774	0.58871	0.0645161	0.589041	0.109589	0.186047	0.530864	1.43137	0.0689655
ANKRD34C	0.327731	0.596639	0.0756303	0.549296	0.126761	0.230769	0.4875	1.47917	0.0818182	0.325	0.591667	0.0833333	0.549296	0.140845	0.25641	0.481481	1.44898	0.0909091
ANKRD56	0.139344	0.836066	0.0245902	0.166667	0.0294118	0.176471	0.161905	5.1	0.0252101	0.139344	0.836066	0.0245902	0.166667	0.0294118	0.176471	0.161905	5.1	0.0252101
ANKS3	0.37037	0.564815	0.0648148	0.655738	0.114754	0.175	0.588235	1.29787	0.0693069	0.366972	0.559633	0.0733945	0.655738	0.131148	0.2	0.57971	1.27083	0.0792079
ANO10	0.180451	0.759398	0.0601504	0.237624	0.0792079	0.333333	0.220183	3.15625	0.064	0.164384	0.691781	0.143836	0.237624	0.207921	0.875	0.196721	2.24444	0.168
ANTXR2	0.198276	0.741379	0.0603448	0.267442	0.0813953	0.304348	0.247312	2.86667	0.0642202	0.174242	0.651515	0.174242	0.267442	0.267442	1	0.211009	1.86957	0.211009
ANXA10	0.12605	0.815126	0.0588235	0.154639	0.0721649	0.466667	0.144231	4.40909	0.0625	0.12605	0.815126	0.0588235	0.154639	0.0721649	0.466667	0.144231	4.40909	0.0625
AP1B1	0.373134	0.606965	0.0199005	0.614754	0.0327869	0.0533333	0.595238	1.5443	0.0203046	0.371287	0.60396	0.0247525	0.614754	0.0409836	0.0666667	0.590551	1.525	0.0253807
AP1B1_ENST00000415447	0.413978	0.564516	0.0215054	0.733333	0.0380952	0.0519481	0.706422	1.2963	0.021978	0.411765	0.561497	0.026738	0.733333	0.047619	0.0649351	0.7	1.28049	0.0274725
AP1M1	0.376147	0.605505	0.0183486	0.621212	0.030303	0.0487805	0.602941	1.53488	0.0186916	0.353448	0.568966	0.0775862	0.621212	0.136364	0.219512	0.546667	1.32	0.0841121
AP2A2	0.277778	0.677778	0.0444444	0.409836	0.0655738	0.16	0.384615	2.10345	0.0465116	0.248756	0.606965	0.144279	0.409836	0.237705	0.58	0.331126	1.5443	0.168605
APC	0.0392203	0.249178	0.711602	0.157399	2.8558	18.1437	0.0408213	0.331874	2.46743	0.0341863	0.217195	0.748618	0.157399	3.44675	21.8982	0.0353964	0.277458	2.97801
APPL1	0.167883	0.737226	0.0948905	0.227723	0.128713	0.565217	0.201754	2.80556	0.104839	0.157534	0.691781	0.150685	0.227723	0.217822	0.956522	0.186992	2.24444	0.177419
AQP7	0.370629	0.622378	0.00699301	0.595506	0.011236	0.0188679	0.588889	1.64815	0.00704225	0.370629	0.622378	0.00699301	0.595506	0.011236	0.0188679	0.588889	1.64815	0.00704225
AQP7_ENST00000539936	0.363309	0.636691	0	0.570621	0	0	0.570621	1.75248	0	0.363309	0.636691	0	0.570621	0	0	0.570621	1.75248	0
AR_ENST00000396043	0.0421941	0.894515	0.0632911	0.0471698	0.0707547	1.5	0.0440529	8.48	0.0675676	0.0421941	0.894515	0.0632911	0.0471698	0.0707547	1.5	0.0440529	8.48	0.0675676
ARFGAP3										0.196078	0.588235	0.215686	0.333333	0.366667	1.1	0.243902	1.42857	0.275
ARHGAP11A	0.115942	0.826087	0.057971	0.140351	0.0701754	0.5	0.131148	4.75	0.0615385	0.115942	0.826087	0.057971	0.140351	0.0701754	0.5	0.131148	4.75	0.0615385
ARHGAP35	0.192308	0.674556	0.133136	0.285088	0.197368	0.692308	0.238095	2.07273	0.153584	0.191176	0.670588	0.138235	0.285088	0.20614	0.723077	0.236364	2.03571	0.16041
ARHGEF16	0.366412	0.618321	0.0152672	0.592593	0.0246914	0.0416667	0.578313	1.62	0.0155039	0.366412	0.618321	0.0152672	0.592593	0.0246914	0.0416667	0.578313	1.62	0.0155039
ARID1A	0.0541327	0.474971	0.470896	0.113971	0.991422	8.69892	0.0572308	0.904656	0.889989	0.0472561	0.414634	0.53811	0.113971	1.29779	11.3871	0.0496	0.708333	1.16502
ARID1B	0.152828	0.712395	0.134777	0.214527	0.189189	0.88189	0.180398	2.47699	0.155772	0.149588	0.697291	0.153121	0.214527	0.219595	1.02362	0.1759	2.3035	0.180807
ARID1B_ENST00000346085	0.142322	0.732834	0.124844	0.194208	0.170358	0.877193	0.165939	2.74299	0.142653	0.139706	0.719363	0.140931	0.194208	0.195911	1.00877	0.162393	2.56332	0.164051
ARID2	0.0856574	0.609562	0.304781	0.140523	0.5	3.55814	0.0936819	1.56122	0.438395	0.0839844	0.597656	0.318359	0.140523	0.53268	3.7907	0.0916844	1.48544	0.467049
ARID5A	0.356522	0.591304	0.0521739	0.602941	0.0882353	0.146341	0.554054	1.44681	0.0550459	0.353448	0.586207	0.0603448	0.602941	0.102941	0.170732	0.546667	1.41667	0.0642202
ARL13B_ENST00000394222										0.144231	0.701923	0.153846	0.205479	0.219178	1.06667	0.168539	2.35484	0.181818
ARMC6_ENST00000535612	0.333333	0.590476	0.0761905	0.564516	0.129032	0.228571	0.5	1.44186	0.0824742	0.333333	0.590476	0.0761905	0.564516	0.129032	0.228571	0.5	1.44186	0.0824742
ASMTL	0.371429	0.617143	0.0114286	0.601852	0.0185185	0.0307692	0.590909	1.61194	0.0115607	0.369318	0.613636	0.0170455	0.601852	0.0277778	0.0461538	0.585586	1.58824	0.017341
ASMTL_ENST00000381317	0.37037	0.617284	0.0123457	0.6	0.02	0.0333333	0.588235	1.6129	0.0125	0.368098	0.613497	0.0184049	0.6	0.03	0.05	0.582524	1.5873	0.01875
ASTE1	0.208955	0.716418	0.0746269	0.291667	0.104167	0.357143	0.264151	2.52632	0.0806452	0.193103	0.662069	0.144828	0.291667	0.21875	0.75	0.239316	1.95918	0.169355
ASXL1	0.121298	0.619182	0.25952	0.1959	0.419134	2.13953	0.138042	1.62593	0.350476	0.112861	0.576115	0.311024	0.1959	0.539863	2.75581	0.127219	1.35913	0.451429
ASXL1_ENST00000306058	0.126214	0.642395	0.231392	0.196474	0.360202	1.83333	0.144444	1.79638	0.301053	0.118361	0.602428	0.279211	0.196474	0.463476	2.35897	0.134251	1.51527	0.387368
ASXL2	0.135977	0.711048	0.152975	0.191235	0.215139	1.125	0.157377	2.46078	0.180602	0.134831	0.705056	0.160112	0.191235	0.227092	1.1875	0.155844	2.39048	0.190635
ASXL2_ENST00000435504	0.123134	0.729478	0.147388	0.168798	0.202046	1.19697	0.140426	2.69655	0.172867	0.122449	0.725417	0.152134	0.168798	0.209719	1.24242	0.139535	2.64189	0.179431
ATAD2	0.142857	0.756839	0.100304	0.188755	0.13253	0.702128	0.166667	3.1125	0.111486	0.135447	0.717579	0.146974	0.188755	0.204819	1.08511	0.156667	2.54082	0.172297
ATF6	0.221429	0.664286	0.114286	0.333333	0.172043	0.516129	0.284404	1.97872	0.129032	0.219858	0.659574	0.120567	0.333333	0.182796	0.548387	0.281818	1.9375	0.137097
ATF7IP	0.19802	0.689769	0.112211	0.287081	0.162679	0.566667	0.246914	2.2234	0.126394	0.196721	0.685246	0.118033	0.287081	0.172249	0.6	0.244898	2.17708	0.133829
ATG14	0.153846	0.711538	0.134615	0.216216	0.189189	0.875	0.181818	2.46667	0.155556	0.150943	0.698113	0.150943	0.216216	0.216216	1	0.177778	2.3125	0.177778
ATHL1	0.360656	0.631148	0.00819672	0.571429	0.012987	0.0227273	0.564103	1.71111	0.00826446	0.360656	0.631148	0.00819672	0.571429	0.012987	0.0227273	0.564103	1.71111	0.00826446
ATM	0.0673317	0.772444	0.160224	0.0871671	0.207425	2.37963	0.0721925	3.39452	0.190794	0.0652568	0.74864	0.186103	0.0871671	0.248588	2.85185	0.0698125	2.97837	0.228656
ATM_ENST00000278616	0.0661818	0.769455	0.164364	0.0860113	0.213611	2.48352	0.0708723	3.33754	0.196693	0.0641749	0.746121	0.189704	0.0860113	0.254253	2.95604	0.0685757	2.93889	0.234117
ATP11B	0.152	0.748	0.1	0.203209	0.13369	0.657895	0.179245	2.96825	0.111111	0.143939	0.708333	0.147727	0.203209	0.208556	1.02632	0.168142	2.42857	0.173333
ATP2B3	0.36	0.621333	0.0186667	0.579399	0.0300429	0.0518519	0.5625	1.64085	0.0190217	0.359043	0.619681	0.0212766	0.579399	0.0343348	0.0592593	0.560166	1.62937	0.0217391
ATP2B3_ENST00000370186	0.361186	0.619946	0.0188679	0.582609	0.0304348	0.0522388	0.565401	1.63121	0.0192308	0.360215	0.61828	0.0215054	0.582609	0.0347826	0.0597015	0.563025	1.61972	0.021978
ATP6V1B1	0.284672	0.620438	0.0948905	0.458824	0.152941	0.333333	0.397959	1.63462	0.104839	0.24375	0.53125	0.225	0.458824	0.423529	0.923077	0.322314	1.13333	0.290323
ATR	0.114943	0.804598	0.0804598	0.142857	0.1	0.7	0.12987	4.11765	0.0875	0.111483	0.780379	0.108138	0.142857	0.138571	0.97	0.125471	3.5533	0.12125
ATRX	0.0777027	0.723818	0.19848	0.107351	0.274212	2.55435	0.0842491	2.6208	0.247629	0.0754098	0.702459	0.222131	0.107351	0.316219	2.94565	0.0815603	2.36088	0.285564
ATRX_ENST00000373344	0.0786219	0.726148	0.19523	0.108273	0.268856	2.48315	0.0853308	2.65161	0.242591	0.0765262	0.706793	0.216681	0.108273	0.306569	2.83146	0.0828678	2.41056	0.276619
AURKA	0.100629	0.798742	0.100629	0.125984	0.125984	1	0.111888	3.96875	0.111888	0.100629	0.798742	0.100629	0.125984	0.125984	1	0.111888	3.96875	0.111888
AXIN1	0.109091	0.66	0.230909	0.165289	0.349862	2.11667	0.122449	1.94118	0.300236	0.10274	0.621575	0.275685	0.165289	0.443526	2.68333	0.114504	1.64253	0.380615
AXIN2	0.138587	0.8125	0.048913	0.170569	0.0602007	0.352941	0.160883	4.33333	0.0514286	0.120853	0.708531	0.170616	0.170569	0.240803	1.41176	0.137466	2.43089	0.205714
AXL	0.149893	0.826552	0.0235546	0.181347	0.0284974	0.157143	0.176322	4.76543	0.0241228	0.143149	0.789366	0.0674847	0.181347	0.0854922	0.471429	0.167064	3.74757	0.0723684
B2M	0.0628019	0.68599	0.251208	0.0915493	0.366197	4	0.0670103	2.18462	0.335484	0.0565217	0.617391	0.326087	0.0915493	0.528169	5.76923	0.0599078	1.61364	0.483871
B2M_ENST00000544417	0.0941176	0.688235	0.217647	0.136752	0.316239	2.3125	0.103896	2.20755	0.278195	0.0869565	0.63587	0.277174	0.136752	0.435897	3.1875	0.0952381	1.74627	0.383459
B3GALT1	0.210526	0.559211	0.230263	0.376471	0.411765	1.09375	0.266667	1.26866	0.299145	0.207792	0.551948	0.24026	0.376471	0.435294	1.15625	0.262295	1.23188	0.316239
BAIAP2L1	0.326389	0.618056	0.0555556	0.52809	0.0898876	0.170213	0.484536	1.61818	0.0588235	0.305195	0.577922	0.116883	0.52809	0.202247	0.382979	0.439252	1.36923	0.132353
BAP1	0.0681818	0.673077	0.258741	0.101299	0.384416	3.79487	0.0731707	2.05882	0.349057	0.0645695	0.637417	0.298013	0.101299	0.467532	4.61538	0.0690265	1.75799	0.424528
BARD1	0.111111	0.831276	0.0576132	0.133663	0.0693069	0.518519	0.125	4.92683	0.0611354	0.108434	0.811245	0.0803213	0.133663	0.0990099	0.740741	0.121622	4.29787	0.0873362
BARD1_ENST00000260947	0.114894	0.829787	0.0553191	0.138462	0.0666667	0.481481	0.129808	4.875	0.0585586	0.112033	0.809129	0.0788382	0.138462	0.0974359	0.703704	0.126168	4.23913	0.0855856
BARHL2	0.37037	0.614815	0.0148148	0.60241	0.0240964	0.04	0.588235	1.59615	0.0150376	0.367647	0.610294	0.0220588	0.60241	0.0361446	0.06	0.581395	1.56604	0.0225564
BCL11A	0.364532	0.625616	0.00985222	0.582677	0.015748	0.027027	0.573643	1.67105	0.00995025	0.358354	0.615012	0.0266344	0.582677	0.0433071	0.0743243	0.558491	1.59748	0.0273632
BCL11A_ENST00000356842	0.376289	0.613402	0.0103093	0.613445	0.0168067	0.0273973	0.603306	1.58667	0.0104167	0.36962	0.602532	0.0278481	0.613445	0.0462185	0.0753425	0.586345	1.51592	0.0286458
BCL2_ENST00000444484	0.35514	0.641745	0.00311526	0.553398	0.00485437	0.00877193	0.550725	1.7913	0.003125	0.35514	0.641745	0.00311526	0.553398	0.00485437	0.00877193	0.550725	1.7913	0.003125
BCL6	0.133117	0.834416	0.0324675	0.159533	0.0389105	0.243902	0.153558	5.03922	0.033557	0.133117	0.834416	0.0324675	0.159533	0.0389105	0.243902	0.153558	5.03922	0.033557
BCL9L	0.253133	0.696742	0.0501253	0.363309	0.0719424	0.19802	0.338926	2.29752	0.0527704	0.225446	0.620536	0.154018	0.363309	0.248201	0.683168	0.291066	1.63529	0.182058
BCL9L_ENST00000392849	0.243836	0.70137	0.0547945	0.347656	0.078125	0.224719	0.322464	2.34862	0.057971	0.215496	0.619855	0.164649	0.347656	0.265625	0.764045	0.274691	1.63057	0.197101
BCMO1	0.358108	0.594595	0.0472973	0.602273	0.0795455	0.132075	0.557895	1.46667	0.0496454	0.358108	0.594595	0.0472973	0.602273	0.0795455	0.132075	0.557895	1.46667	0.0496454
BCOR	0.162162	0.691323	0.146515	0.234568	0.211934	0.903509	0.193548	2.23963	0.171667	0.155102	0.661224	0.183673	0.234568	0.277778	1.18421	0.183575	1.95181	0.225
BCOR_ENST00000378444	0.160584	0.70073	0.138686	0.229167	0.197917	0.863636	0.191304	2.34146	0.161017	0.157819	0.688666	0.153515	0.229167	0.222917	0.972727	0.187394	2.21198	0.181356
BCOR_ENST00000378463	0.133574	0.732852	0.133574	0.182266	0.182266	1	0.154167	2.74324	0.154167	0.130282	0.714789	0.15493	0.182266	0.216749	1.18919	0.149798	2.50617	0.183333
BCORL1	0.269151	0.643892	0.0869565	0.418006	0.135048	0.323077	0.368272	1.80814	0.0952381	0.25	0.598077	0.151923	0.418006	0.254019	0.607692	0.333333	1.48804	0.179138
BDKRB1	0.336538	0.596154	0.0673077	0.564516	0.112903	0.2	0.507246	1.47619	0.0721649	0.336538	0.596154	0.0673077	0.564516	0.112903	0.2	0.507246	1.47619	0.0721649
BDKRB2	0.37415	0.564626	0.0612245	0.662651	0.108434	0.163636	0.597826	1.29687	0.0652174	0.37415	0.564626	0.0612245	0.662651	0.108434	0.163636	0.597826	1.29687	0.0652174
BICC1_ENST00000263103	0.137931	0.82069	0.0413793	0.168067	0.0504202	0.3	0.16	4.57692	0.0431655	0.136986	0.815068	0.0479452	0.168067	0.0588235	0.35	0.15873	4.40741	0.0503597
BIN1	0.360656	0.581967	0.057377	0.619718	0.0985915	0.159091	0.564103	1.39216	0.0608696	0.354839	0.572581	0.0725806	0.619718	0.126761	0.204545	0.55	1.33962	0.0782609
BIN2	0.242604	0.639053	0.118343	0.37963	0.185185	0.487805	0.320312	1.77049	0.134228	0.242604	0.639053	0.118343	0.37963	0.185185	0.487805	0.320312	1.77049	0.134228
BIRC2	0.145455	0.818182	0.0363636	0.177778	0.0444444	0.25	0.170213	4.5	0.0377358	0.145455	0.818182	0.0363636	0.177778	0.0444444	0.25	0.170213	4.5	0.0377358
BIRC3	0.0939227	0.812155	0.0939227	0.115646	0.115646	1	0.103659	4.32353	0.103659	0.0894737	0.773684	0.136842	0.115646	0.176871	1.52941	0.0982659	3.4186	0.158537
BMPR2	0.170833	0.675	0.154167	0.253086	0.228395	0.902439	0.20603	2.07692	0.182266	0.13141	0.519231	0.349359	0.253086	0.67284	2.65854	0.151292	1.08	0.536946
BPI	0.359281	0.586826	0.0538922	0.612245	0.0918367	0.15	0.560748	1.42029	0.056962	0.359281	0.586826	0.0538922	0.612245	0.0918367	0.15	0.560748	1.42029	0.056962
BRAF	0.0147293	0.980494	0.00477707	0.0150223	0.00487211	0.324324	0.0149495	50.2653	0.0048	0.0147	0.978546	0.00675407	0.0150223	0.00690215	0.459459	0.0149194	45.6111	0.0068
BRCA1	0.107937	0.798413	0.0936508	0.135189	0.117296	0.867647	0.120996	3.96063	0.103327	0.1051	0.777434	0.117465	0.135189	0.151093	1.11765	0.117444	3.49306	0.1331
BRCA1_ENST00000471181	0.112745	0.808824	0.0784314	0.139394	0.0969697	0.695652	0.127072	4.23077	0.0851064	0.11147	0.799677	0.088853	0.139394	0.111111	0.797101	0.125455	3.99194	0.0975177
BRCA2	0.106667	0.792889	0.100444	0.134529	0.126682	0.941667	0.119403	3.82833	0.11166	0.102389	0.761092	0.136519	0.134529	0.179372	1.33333	0.114068	3.18571	0.158103
BRCA2_ENST00000544455	0.108133	0.797597	0.0942699	0.135574	0.118192	0.871795	0.121244	3.94064	0.104082	0.104371	0.769848	0.125781	0.135574	0.163384	1.20513	0.116534	3.34496	0.143878
BRD7	0.179641	0.60479	0.215569	0.29703	0.356436	1.2	0.218978	1.5303	0.274809	0.17341	0.583815	0.242775	0.29703	0.415842	1.4	0.20979	1.40278	0.320611
BRE	0.166667	0.764706	0.0686275	0.217949	0.0897436	0.411765	0.2	3.25	0.0736842	0.151786	0.696429	0.151786	0.217949	0.217949	1	0.178947	2.29412	0.178947
BRE_ENST00000342045										0.128713	0.70297	0.168317	0.183099	0.239437	1.30769	0.147727	2.36667	0.202381
BRIP1	0.106329	0.837975	0.0556962	0.126888	0.0664653	0.52381	0.11898	5.17188	0.0589812	0.106329	0.837975	0.0556962	0.126888	0.0664653	0.52381	0.11898	5.17188	0.0589812
BRIP1_ENST00000259008	0.108808	0.836788	0.0544041	0.130031	0.0650155	0.5	0.122093	5.12698	0.0575342	0.108808	0.836788	0.0544041	0.130031	0.0650155	0.5	0.122093	5.12698	0.0575342
BTBD17	0.370968	0.620968	0.00806452	0.597403	0.012987	0.0217391	0.589744	1.6383	0.00813008	0.370968	0.620968	0.00806452	0.597403	0.012987	0.0217391	0.589744	1.6383	0.00813008
BTBD7_ENST00000298896	0.333333	0.598039	0.0686275	0.557377	0.114754	0.205882	0.5	1.4878	0.0736842	0.306306	0.54955	0.144144	0.557377	0.262295	0.470588	0.441558	1.22	0.168421
BTN3A1	0.384615	0.57265	0.042735	0.671642	0.0746269	0.111111	0.625	1.34	0.0446429	0.378151	0.563025	0.0588235	0.671642	0.104478	0.155556	0.608108	1.28846	0.0625
BTNL3	0.167832	0.825175	0.00699301	0.20339	0.00847458	0.0416667	0.201681	4.72	0.00704225	0.162162	0.797297	0.0405405	0.20339	0.0508475	0.25	0.193548	3.93333	0.0422535
C10orf68	0.184049	0.723926	0.0920245	0.254237	0.127119	0.5	0.225564	2.62222	0.101351	0.172414	0.678161	0.149425	0.254237	0.220339	0.866667	0.208333	2.10714	0.175676
C12orf26	0.11465	0.815287	0.0700637	0.140625	0.0859375	0.611111	0.129496	4.41379	0.0753425	0.113924	0.810127	0.0759494	0.140625	0.09375	0.666667	0.128571	4.26667	0.0821918
C12orf4	0.201923	0.682692	0.115385	0.295775	0.169014	0.571429	0.253012	2.15152	0.130435	0.2	0.67619	0.12381	0.295775	0.183099	0.619048	0.25	2.08824	0.141304
C14orf39	0.156863	0.759804	0.0833333	0.206452	0.109677	0.53125	0.186047	3.16327	0.0909091	0.144796	0.701357	0.153846	0.206452	0.219355	1.0625	0.169312	2.34848	0.181818
C14orf43	0.251121	0.636771	0.112108	0.394366	0.176056	0.446429	0.335329	1.75309	0.126263	0.212928	0.539924	0.247148	0.394366	0.457746	1.16071	0.270531	1.17355	0.328283
C15orf27	0.393701	0.598425	0.00787402	0.657895	0.0131579	0.02	0.649351	1.4902	0.00793651	0.393701	0.598425	0.00787402	0.657895	0.0131579	0.02	0.649351	1.4902	0.00793651
C15orf33	0.198758	0.670807	0.130435	0.296296	0.194444	0.65625	0.248062	2.03774	0.15	0.195122	0.658537	0.146341	0.296296	0.222222	0.75	0.242424	1.92857	0.171429
C16orf88	0.273585	0.679245	0.0471698	0.402778	0.0694444	0.172414	0.376623	2.11765	0.049505	0.230159	0.571429	0.198413	0.402778	0.347222	0.862069	0.298969	1.33333	0.247525
C17orf28	0.367232	0.60452	0.0282486	0.607477	0.046729	0.0769231	0.580357	1.52857	0.0290698	0.365169	0.601124	0.0337079	0.607477	0.0560748	0.0923077	0.575221	1.50704	0.0348837
C17orf63	0.471014	0.485507	0.0434783	0.970149	0.0895522	0.0923077	0.890411	0.943662	0.0454545	0.457746	0.471831	0.0704225	0.970149	0.149254	0.153846	0.844156	0.893333	0.0757576
C17orf63_ENST00000341217	0.459854	0.49635	0.0437956	0.926471	0.0882353	0.0952381	0.851351	0.985507	0.0458015	0.446809	0.48227	0.070922	0.926471	0.147059	0.15873	0.807692	0.931507	0.0763359
C17orf70	0.395722	0.593583	0.0106952	0.666667	0.018018	0.027027	0.654867	1.46053	0.0108108	0.393617	0.590426	0.0159574	0.666667	0.027027	0.0405405	0.649123	1.44156	0.0162162
C17orf70_ENST00000327787	0.387255	0.598039	0.0147059	0.647541	0.0245902	0.0379747	0.632	1.4878	0.0149254	0.385366	0.595122	0.0195122	0.647541	0.0327869	0.0506329	0.626984	1.46988	0.0199005
C18orf34	0.138801	0.766562	0.0946372	0.18107	0.123457	0.681818	0.161172	3.28378	0.10453	0.129412	0.714706	0.155882	0.18107	0.218107	1.20455	0.148649	2.50515	0.184669
C18orf34_ENST00000383096	0.144578	0.76506	0.0903614	0.188976	0.11811	0.625	0.169014	3.25641	0.0993377	0.134078	0.709497	0.156425	0.188976	0.220472	1.16667	0.154839	2.44231	0.18543
C1orf114	0.176056	0.739437	0.084507	0.238095	0.114286	0.48	0.213675	2.83784	0.0923077	0.160256	0.673077	0.166667	0.238095	0.247619	1.04	0.19084	2.05882	0.2
C22orf28										0.190476	0.609524	0.2	0.3125	0.328125	1.05	0.235294	1.56098	0.25
C2orf67	0.198795	0.76506	0.0361446	0.259843	0.0472441	0.181818	0.24812	3.25641	0.0375	0.174603	0.671958	0.153439	0.259843	0.228346	0.878788	0.211538	2.04839	0.18125
C5AR1	0.355556	0.644444	0	0.551724	0	0	0.551724	1.8125	0	0.355556	0.644444	0	0.551724	0	0	0.551724	1.8125	0
C7orf72	0.0980392	0.862745	0.0392157	0.113636	0.0454545	0.4	0.108696	6.28571	0.0408163	0.0970874	0.854369	0.0485437	0.113636	0.0568182	0.5	0.107527	5.86667	0.0510204
C8orf45	0.0948905	0.832117	0.0729927	0.114035	0.0877193	0.769231	0.104839	4.95652	0.0787402	0.0942029	0.826087	0.0797101	0.114035	0.0964912	0.846154	0.104	4.75	0.0866142
C9orf131	0.171717	0.762626	0.0656566	0.225166	0.0860927	0.382353	0.207317	3.21277	0.0702703	0.151786	0.674107	0.174107	0.225166	0.258278	1.14706	0.178947	2.06849	0.210811
CACNB1	0.385321	0.559633	0.0550459	0.688525	0.0983607	0.142857	0.626866	1.27083	0.0582524	0.385321	0.559633	0.0550459	0.688525	0.0983607	0.142857	0.626866	1.27083	0.0582524
CACNG2	0.438017	0.495868	0.0661157	0.883333	0.133333	0.150943	0.779412	0.983607	0.0707965	0.438017	0.495868	0.0661157	0.883333	0.133333	0.150943	0.779412	0.983607	0.0707965
CACNG5	0.362069	0.62069	0.0172414	0.583333	0.0277778	0.047619	0.567568	1.63636	0.0175439	0.362069	0.62069	0.0172414	0.583333	0.0277778	0.047619	0.567568	1.63636	0.0175439
CALB2	0.383178	0.588785	0.0280374	0.650794	0.047619	0.0731707	0.621212	1.43182	0.0288462	0.37963	0.583333	0.037037	0.650794	0.0634921	0.097561	0.61194	1.4	0.0384615
CaMK1b	0.407407	0.583333	0.00925926	0.698413	0.015873	0.0227273	0.6875	1.4	0.00934579	0.407407	0.583333	0.00925926	0.698413	0.015873	0.0227273	0.6875	1.4	0.00934579
CAPN7	0.126866	0.761194	0.11194	0.166667	0.147059	0.882353	0.145299	3.1875	0.12605	0.125	0.75	0.125	0.166667	0.166667	1	0.142857	3	0.142857
CAPS2_ENST00000409445	0.113043	0.817391	0.0695652	0.138298	0.0851064	0.615385	0.127451	4.47619	0.0747664	0.113043	0.817391	0.0695652	0.138298	0.0851064	0.615385	0.127451	4.47619	0.0747664
CAPZA3	0.190789	0.684211	0.125	0.278846	0.182692	0.655172	0.235772	2.16667	0.142857	0.190789	0.684211	0.125	0.278846	0.182692	0.655172	0.235772	2.16667	0.142857
CARD9_ENST00000371734	0.357664	0.59854	0.0437956	0.597561	0.0731707	0.122449	0.556818	1.49091	0.0458015	0.357664	0.59854	0.0437956	0.597561	0.0731707	0.122449	0.556818	1.49091	0.0458015
CASD1	0.157303	0.820225	0.0224719	0.191781	0.0273973	0.142857	0.186667	4.5625	0.0229885	0.14359	0.748718	0.107692	0.191781	0.143836	0.75	0.167665	2.97959	0.12069
CASP5_ENST00000393141	0.2	0.772414	0.0275862	0.258929	0.0357143	0.137931	0.25	3.39394	0.0283688	0.173653	0.670659	0.155689	0.258929	0.232143	0.896552	0.210145	2.03636	0.184397
CASP8	0.056338	0.711268	0.232394	0.0792079	0.326733	4.125	0.0597015	2.46341	0.302752	0.0536913	0.677852	0.268456	0.0792079	0.39604	5	0.0567376	2.10417	0.366972
CASP8_ENST00000264275	0.0522193	0.715405	0.232376	0.0729927	0.324818	4.45	0.0550964	2.51376	0.302721	0.0498753	0.683292	0.266833	0.0729927	0.390511	5.35	0.0524934	2.15748	0.363946
CASP8_ENST00000358485	0.047619	0.72381	0.228571	0.0657895	0.315789	4.8	0.05	2.62069	0.296296	0.0454545	0.690909	0.263636	0.0657895	0.381579	5.8	0.047619	2.23529	0.358025
CBFB_ENST00000290858	0.0956522	0.678261	0.226087	0.141026	0.333333	2.36364	0.105769	2.10811	0.292135	0.0956522	0.678261	0.226087	0.141026	0.333333	2.36364	0.105769	2.10811	0.292135
CBFB_ENST00000412916	0.08	0.688	0.232	0.116279	0.337209	2.9	0.0869565	2.20513	0.302083	0.08	0.688	0.232	0.116279	0.337209	2.9	0.0869565	2.20513	0.302083
CBLN4	0.368932	0.621359	0.00970874	0.59375	0.015625	0.0263158	0.584615	1.64103	0.00980392	0.368932	0.621359	0.00970874	0.59375	0.015625	0.0263158	0.584615	1.64103	0.00980392
CBX6	0.388889	0.611111	0	0.636364	0	0	0.636364	1.57143	0	0.385321	0.605505	0.00917431	0.636364	0.0151515	0.0238095	0.626866	1.53488	0.00925926
CCAR1	0.122807	0.75	0.127193	0.163743	0.169591	1.03571	0.14	3	0.145729	0.122807	0.75	0.127193	0.163743	0.169591	1.03571	0.14	3	0.145729
CCDC102B_ENST00000584156	0.185185	0.697531	0.117284	0.265487	0.168142	0.633333	0.227273	2.30612	0.132867	0.182927	0.689024	0.128049	0.265487	0.185841	0.7	0.223881	2.21569	0.146853
CCDC116	0.373418	0.620253	0.00632911	0.602041	0.0102041	0.0169492	0.59596	1.63333	0.00636943	0.373418	0.620253	0.00632911	0.602041	0.0102041	0.0169492	0.59596	1.63333	0.00636943
CCDC14	0.23741	0.640288	0.122302	0.370787	0.191011	0.515152	0.311321	1.78	0.139344	0.235714	0.635714	0.128571	0.370787	0.202247	0.545455	0.308411	1.7451	0.147541
CCDC14_ENST00000488653	0.221591	0.647727	0.130682	0.342105	0.201754	0.589744	0.284672	1.83871	0.150327	0.221591	0.647727	0.130682	0.342105	0.201754	0.589744	0.284672	1.83871	0.150327
CCDC28A	0.23301	0.679612	0.0873786	0.342857	0.128571	0.375	0.303797	2.12121	0.0957447	0.192	0.56	0.248	0.342857	0.442857	1.29167	0.237624	1.27273	0.329787
CCDC35	0.147541	0.827869	0.0245902	0.178218	0.029703	0.166667	0.173077	4.80952	0.0252101	0.147541	0.827869	0.0245902	0.178218	0.029703	0.166667	0.173077	4.80952	0.0252101
CCDC41	0.147541	0.680328	0.172131	0.216867	0.253012	1.16667	0.173077	2.12821	0.207921	0.147541	0.680328	0.172131	0.216867	0.253012	1.16667	0.173077	2.12821	0.207921
CCDC6	0.144231	0.740385	0.115385	0.194805	0.155844	0.8	0.168539	2.85185	0.130435	0.144231	0.740385	0.115385	0.194805	0.155844	0.8	0.168539	2.85185	0.130435
CCDC66	0.111111	0.709402	0.179487	0.156627	0.253012	1.61538	0.125	2.44118	0.21875	0.104839	0.669355	0.225806	0.156627	0.337349	2.15385	0.117117	2.02439	0.291667
CCDC66_ENST00000394672	0.107438	0.735537	0.157025	0.146067	0.213483	1.46154	0.12037	2.78125	0.186275	0.0970149	0.664179	0.238806	0.146067	0.359551	2.46154	0.107438	1.97778	0.313725
CCDC66_ENST00000436465	0.105263	0.72807	0.166667	0.144578	0.228916	1.58333	0.117647	2.67742	0.2	0.102564	0.709402	0.188034	0.144578	0.26506	1.83333	0.114286	2.44118	0.231579
CCDC73	0.197425	0.729614	0.0729614	0.270588	0.1	0.369565	0.245989	2.69841	0.0787037	0.172285	0.636704	0.191011	0.270588	0.3	1.1087	0.208145	1.75258	0.236111
CCDC82	0.171171	0.684685	0.144144	0.25	0.210526	0.842105	0.206522	2.17143	0.168421	0.169643	0.678571	0.151786	0.25	0.223684	0.894737	0.204301	2.11111	0.178947
CCND2	0.14094	0.818792	0.0402685	0.172131	0.0491803	0.285714	0.164062	4.51852	0.041958	0.14094	0.818792	0.0402685	0.172131	0.0491803	0.285714	0.164062	4.51852	0.041958
CCND3	0.157025	0.702479	0.140496	0.223529	0.2	0.894737	0.186275	2.36111	0.163462	0.154472	0.691057	0.154472	0.223529	0.223529	1	0.182692	2.23684	0.182692
CCNE1	0.108696	0.84058	0.0507246	0.12931	0.0603448	0.466667	0.121951	5.27273	0.0534351	0.108696	0.84058	0.0507246	0.12931	0.0603448	0.466667	0.121951	5.27273	0.0534351
CCNJL	0.373832	0.570093	0.0560748	0.655738	0.0983607	0.15	0.597015	1.32609	0.0594059	0.373832	0.570093	0.0560748	0.655738	0.0983607	0.15	0.597015	1.32609	0.0594059
CCR4	0.134831	0.421348	0.44382	0.32	1.05333	3.29167	0.155844	0.728155	0.79798	0.134831	0.421348	0.44382	0.32	1.05333	3.29167	0.155844	0.728155	0.79798
CCR7	0.214286	0.492063	0.293651	0.435484	0.596774	1.37037	0.272727	0.96875	0.41573	0.214286	0.492063	0.293651	0.435484	0.596774	1.37037	0.272727	0.96875	0.41573
CCT3	0.193277	0.731092	0.0756303	0.264368	0.103448	0.391304	0.239583	2.71875	0.0818182	0.174242	0.659091	0.166667	0.264368	0.252874	0.956522	0.211009	1.93333	0.2
CCT7_ENST00000258091	0.393162	0.555556	0.0512821	0.707692	0.0923077	0.130435	0.647887	1.25	0.0540541	0.380165	0.53719	0.0826446	0.707692	0.153846	0.217391	0.613333	1.16071	0.0900901
CD79A										0.145631	0.650485	0.203883	0.223881	0.313433	1.4	0.170455	1.86111	0.256098
CD79B	0.114286	0.807143	0.0785714	0.141593	0.0973451	0.6875	0.129032	4.18519	0.0852713	0.113475	0.801418	0.0851064	0.141593	0.106195	0.75	0.128	4.03571	0.0930233
CD93	0.341297	0.607509	0.0511945	0.561798	0.0842697	0.15	0.518135	1.54783	0.0539568	0.314465	0.559748	0.125786	0.561798	0.224719	0.4	0.458716	1.27143	0.143885
CDC14A	0.237762	0.692308	0.0699301	0.343434	0.10101	0.294118	0.311927	2.25	0.075188	0.2125	0.61875	0.16875	0.343434	0.272727	0.794118	0.269841	1.62295	0.203008
CDC14A_ENST00000361544	0.244094	0.677165	0.0787402	0.360465	0.116279	0.322581	0.322917	2.09756	0.0854701	0.224638	0.623188	0.152174	0.360465	0.244186	0.677419	0.28972	1.65385	0.179487
CDC23	0.156522	0.834783	0.00869565	0.1875	0.0104167	0.0555556	0.185567	5.05263	0.00877193	0.155172	0.827586	0.0172414	0.1875	0.0208333	0.111111	0.183673	4.8	0.0175439
CDC7	0.156863	0.705882	0.137255	0.222222	0.194444	0.875	0.186047	2.4	0.159091	0.134454	0.605042	0.260504	0.222222	0.430556	1.9375	0.15534	1.53191	0.352273
CDC73	0.064	0.776	0.16	0.0824742	0.206186	2.5	0.0683761	3.46429	0.190476	0.0608365	0.737643	0.201521	0.0824742	0.273196	3.3125	0.0647773	2.81159	0.252381
CDCA7L	0.133929	0.732143	0.133929	0.182927	0.182927	1	0.154639	2.73333	0.154639	0.132743	0.725664	0.141593	0.182927	0.195122	1.06667	0.153061	2.64516	0.164948
CDCP2	0.472222	0.518519	0.00925926	0.910714	0.0178571	0.0196078	0.894737	1.07692	0.00934579	0.46789	0.513761	0.0183486	0.910714	0.0357143	0.0392157	0.87931	1.0566	0.0186916
CDH1	0.11042	0.656299	0.233281	0.168246	0.35545	2.11268	0.124126	1.9095	0.30426	0.104566	0.621502	0.273932	0.168246	0.440758	2.61972	0.116776	1.64202	0.377282
CDH26	0.306818	0.617424	0.0757576	0.496933	0.122699	0.246914	0.442623	1.61386	0.0819672	0.27931	0.562069	0.158621	0.496933	0.282209	0.567901	0.38756	1.28346	0.188525
CDK12	0.137476	0.73258	0.129944	0.187661	0.177378	0.945205	0.159389	2.73944	0.149351	0.131532	0.700901	0.167568	0.187661	0.239075	1.27397	0.151452	2.34337	0.201299
CDK18_ENST00000429964	0.365079	0.626984	0.00793651	0.582278	0.0126582	0.0217391	0.575	1.68085	0.008	0.362205	0.622047	0.015748	0.582278	0.0253165	0.0434783	0.567901	1.64583	0.016
CDK8	0.0891089	0.767327	0.143564	0.116129	0.187097	1.61111	0.0978261	3.29787	0.16763	0.0891089	0.767327	0.143564	0.116129	0.187097	1.61111	0.0978261	3.29787	0.16763
CDKAL1	0.154545	0.827273	0.0181818	0.186813	0.021978	0.117647	0.182796	4.78947	0.0185185	0.154545	0.827273	0.0181818	0.186813	0.021978	0.117647	0.182796	4.78947	0.0185185
CDKN1A	0.103704	0.674074	0.222222	0.153846	0.32967	2.14286	0.115702	2.06818	0.285714	0.102941	0.669118	0.227941	0.153846	0.340659	2.21429	0.114754	2.02222	0.295238
CDKN1A_ENST00000448526	0.120968	0.669355	0.209677	0.180723	0.313253	1.73333	0.137615	2.02439	0.265306	0.12	0.664	0.216	0.180723	0.325301	1.8	0.136364	1.97619	0.27551
CDKN1B	0.0909091	0.554545	0.354545	0.163934	0.639344	3.9	0.1	1.2449	0.549296	0.0769231	0.469231	0.453846	0.163934	0.967213	5.9	0.0833333	0.884058	0.830986
CDKN2A	0.0729167	0.582465	0.344618	0.125186	0.591654	4.72619	0.0786517	1.39501	0.525828	0.0705882	0.563866	0.365546	0.125186	0.648286	5.17857	0.0759494	1.29287	0.576159
CDKN2A_ENST00000446177	0.0582147	0.554981	0.386805	0.104895	0.69697	6.64444	0.0618132	1.24709	0.630802	0.0577664	0.550706	0.391528	0.104895	0.710956	6.77778	0.0613079	1.22571	0.64346
CDKN2A_ENST00000498124	0.0563565	0.564875	0.378768	0.099768	0.670534	6.72093	0.0597222	1.29819	0.609705	0.0562092	0.563399	0.380392	0.099768	0.675174	6.76744	0.0595568	1.29042	0.613924
CEBPA	0.145455	0.781818	0.0727273	0.186047	0.0930233	0.5	0.170213	3.58333	0.0784314	0.115942	0.623188	0.26087	0.186047	0.418605	2.25	0.131148	1.65385	0.352941
CENPC1	0.15	0.764286	0.0857143	0.196262	0.11215	0.571429	0.176471	3.24242	0.09375	0.130435	0.664596	0.204969	0.196262	0.308411	1.57143	0.15	1.98148	0.257812
CENPI	0.165605	0.821656	0.0127389	0.20155	0.0155039	0.0769231	0.198473	4.60714	0.0129032	0.163522	0.811321	0.0251572	0.20155	0.0310078	0.153846	0.195489	4.3	0.0258065
CEP135	0.106796	0.752427	0.140777	0.141935	0.187097	1.31818	0.119565	3.03922	0.163842	0.10628	0.748792	0.144928	0.141935	0.193548	1.36364	0.118919	2.98077	0.169492
CEP290	0.146067	0.758427	0.0955056	0.192593	0.125926	0.653846	0.171053	3.13953	0.10559	0.134021	0.695876	0.170103	0.192593	0.244444	1.26923	0.154762	2.28814	0.204969
CEP290_ENST00000309041	0.0935961	0.817734	0.08867	0.114458	0.108434	0.947368	0.103261	4.48649	0.0972973	0.0935961	0.817734	0.08867	0.114458	0.108434	0.947368	0.103261	4.48649	0.0972973
CEP95	0.155844	0.707792	0.136364	0.220183	0.192661	0.875	0.184615	2.42222	0.157895	0.154839	0.703226	0.141935	0.220183	0.201835	0.916667	0.183206	2.36957	0.165414
CEP95_ENST00000556440	0.147651	0.711409	0.14094	0.207547	0.198113	0.954545	0.173228	2.46512	0.164062	0.146667	0.706667	0.146667	0.207547	0.207547	1	0.171875	2.40909	0.171875
CERK	0.235849	0.679245	0.0849057	0.347222	0.125	0.36	0.308642	2.11765	0.0927835	0.206612	0.595041	0.198347	0.347222	0.333333	0.96	0.260417	1.46939	0.247423
CES5A	0.348066	0.563536	0.0883978	0.617647	0.156863	0.253968	0.533898	1.29114	0.0969697	0.346154	0.56044	0.0934066	0.617647	0.166667	0.269841	0.529412	1.275	0.10303
CES5A_ENST00000521992	0.334975	0.586207	0.0788177	0.571429	0.134454	0.235294	0.503704	1.41667	0.0855615	0.333333	0.583333	0.0833333	0.571429	0.142857	0.25	0.5	1.4	0.0909091
CETP	0.4	0.55	0.05	0.727273	0.0909091	0.125	0.666667	1.22222	0.0526316	0.393443	0.540984	0.0655738	0.727273	0.121212	0.166667	0.648649	1.17857	0.0701754
CFHR3	0.119497	0.823899	0.0566038	0.145038	0.0687023	0.473684	0.135714	4.67857	0.06	0.119497	0.823899	0.0566038	0.145038	0.0687023	0.473684	0.135714	4.67857	0.06
CFI	0.236559	0.634409	0.129032	0.372881	0.20339	0.545455	0.309859	1.73529	0.148148	0.231579	0.621053	0.147368	0.372881	0.237288	0.636364	0.30137	1.63889	0.17284
CFP	0.184	0.704	0.112	0.261364	0.159091	0.608696	0.22549	2.37838	0.126126	0.18254	0.698413	0.119048	0.261364	0.170455	0.652174	0.223301	2.31579	0.135135
CHD1L	0.121387	0.83815	0.0404624	0.144828	0.0482759	0.333333	0.138158	5.17857	0.0421687	0.121387	0.83815	0.0404624	0.144828	0.0482759	0.333333	0.138158	5.17857	0.0421687
CHD1L_ENST00000369258	0.106557	0.852459	0.0409836	0.125	0.0480769	0.384615	0.119266	5.77778	0.042735	0.106557	0.852459	0.0409836	0.125	0.0480769	0.384615	0.119266	5.77778	0.042735
CHD5_ENST00000262450	0.355932	0.619414	0.0246533	0.574627	0.039801	0.0692641	0.552632	1.62753	0.0252765	0.355385	0.618462	0.0261538	0.574627	0.0422886	0.0735931	0.551313	1.62097	0.0268562
CHEK1	0.10219	0.854015	0.0437956	0.119658	0.0512821	0.428571	0.113821	5.85	0.0458015	0.0897436	0.75	0.160256	0.119658	0.213675	1.78571	0.0985915	3	0.19084
CHEK2	0.0743802	0.834711	0.0909091	0.0891089	0.108911	1.22222	0.0803571	5.05	0.1	0.0740741	0.831276	0.0946502	0.0891089	0.113861	1.27778	0.08	4.92683	0.104545
CHEK2_ENST00000382580	0.0580645	0.83871	0.103226	0.0692308	0.123077	1.77778	0.0616438	5.2	0.115108	0.0580645	0.83871	0.103226	0.0692308	0.123077	1.77778	0.0616438	5.2	0.115108
CHRDL1	0.218045	0.669173	0.112782	0.325843	0.168539	0.517241	0.278846	2.02273	0.127119	0.216418	0.664179	0.119403	0.325843	0.179775	0.551724	0.27619	1.97778	0.135593
CHRM4	0.393103	0.572414	0.0344828	0.686747	0.060241	0.0877193	0.647727	1.33871	0.0357143	0.385135	0.560811	0.0540541	0.686747	0.0963855	0.140351	0.626374	1.27692	0.0571429
CHRNB2	0.359788	0.62963	0.010582	0.571429	0.0168067	0.0294118	0.561983	1.7	0.0106952	0.359788	0.62963	0.010582	0.571429	0.0168067	0.0294118	0.561983	1.7	0.0106952
CHRNG	0.364407	0.601695	0.0338983	0.605634	0.056338	0.0930233	0.573333	1.51064	0.0350877	0.361345	0.596639	0.0420168	0.605634	0.0704225	0.116279	0.565789	1.47917	0.0438596
CHST11	0.356061	0.621212	0.0227273	0.573171	0.0365854	0.0638298	0.552941	1.64	0.0232558	0.356061	0.621212	0.0227273	0.573171	0.0365854	0.0638298	0.552941	1.64	0.0232558
CHST12	0.409722	0.590278	0	0.694118	0	0	0.694118	1.44068	0	0.40411	0.582192	0.0136986	0.694118	0.0235294	0.0338983	0.678161	1.39344	0.0138889
CHST4	0.365854	0.609756	0.0243902	0.6	0.04	0.0666667	0.576923	1.5625	0.025	0.354331	0.590551	0.0551181	0.6	0.0933333	0.155556	0.54878	1.44231	0.0583333
CHUK	0.118421	0.743421	0.138158	0.159292	0.185841	1.16667	0.134328	2.89744	0.160305	0.116129	0.729032	0.154839	0.159292	0.212389	1.33333	0.131387	2.69048	0.183206
CKAP2	0.23301	0.728155	0.038835	0.32	0.0533333	0.166667	0.303797	2.67857	0.040404	0.1875	0.585938	0.226562	0.32	0.386667	1.20833	0.230769	1.41509	0.292929
CLCN3	0.228916	0.73494	0.0361446	0.311475	0.0491803	0.157895	0.296875	2.77273	0.0375	0.202128	0.648936	0.148936	0.311475	0.229508	0.736842	0.253333	1.84848	0.175
CLCN7	0.382514	0.590164	0.0273224	0.648148	0.0462963	0.0714286	0.619469	1.44	0.0280899	0.382514	0.590164	0.0273224	0.648148	0.0462963	0.0714286	0.619469	1.44	0.0280899
CLOCK	0.164384	0.767123	0.0684932	0.214286	0.0892857	0.416667	0.196721	3.29412	0.0735294	0.143713	0.670659	0.185629	0.214286	0.276786	1.29167	0.167832	2.03636	0.227941
CLSPN	0.166667	0.717172	0.116162	0.232394	0.161972	0.69697	0.2	2.53571	0.131429	0.165829	0.713568	0.120603	0.232394	0.169014	0.727273	0.198795	2.49123	0.137143
CLSPN_ENST00000251195	0.157895	0.726316	0.115789	0.217391	0.15942	0.733333	0.1875	2.65385	0.130952	0.157068	0.722513	0.120419	0.217391	0.166667	0.766667	0.186335	2.60377	0.136905
CNKSR3	0.358779	0.603053	0.0381679	0.594937	0.0632911	0.106383	0.559524	1.51923	0.0396825	0.356061	0.598485	0.0454545	0.594937	0.0759494	0.12766	0.552941	1.49057	0.047619
CNR1	0.344186	0.590698	0.0651163	0.582677	0.110236	0.189189	0.524823	1.44318	0.0696517	0.344186	0.590698	0.0651163	0.582677	0.110236	0.189189	0.524823	1.44318	0.0696517
CNTN6	0.187713	0.696246	0.116041	0.269608	0.166667	0.618182	0.231092	2.29213	0.131274	0.180033	0.667758	0.152209	0.269608	0.227941	0.845455	0.219561	2.00985	0.179537
COBLL1	0.161765	0.768382	0.0698529	0.210526	0.0909091	0.431818	0.192982	3.31746	0.0750988	0.146179	0.694352	0.159468	0.210526	0.229665	1.09091	0.171206	2.27174	0.189723
COIL	0.156522	0.817391	0.026087	0.191489	0.0319149	0.166667	0.185567	4.47619	0.0267857	0.134328	0.701493	0.164179	0.191489	0.234043	1.22222	0.155172	2.35	0.196429
COLQ	0.222222	0.648148	0.12963	0.342857	0.2	0.583333	0.285714	1.84211	0.148936	0.222222	0.648148	0.12963	0.342857	0.2	0.583333	0.285714	1.84211	0.148936
COLQ_ENST00000383781	0.194175	0.669903	0.135922	0.289855	0.202899	0.7	0.240964	2.02941	0.157303	0.194175	0.669903	0.135922	0.289855	0.202899	0.7	0.240964	2.02941	0.157303
COLQ_ENST00000435459	0.207921	0.643564	0.148515	0.323077	0.230769	0.714286	0.2625	1.80556	0.174419	0.207921	0.643564	0.148515	0.323077	0.230769	0.714286	0.2625	1.80556	0.174419
CPA6_ENST00000518549	0.201923	0.653846	0.144231	0.308824	0.220588	0.714286	0.253012	1.88889	0.168539	0.201923	0.653846	0.144231	0.308824	0.220588	0.714286	0.253012	1.88889	0.168539
CPEB2	0.165517	0.751724	0.0827586	0.220183	0.110092	0.5	0.198347	3.02778	0.0902256	0.139535	0.633721	0.226744	0.220183	0.357798	1.625	0.162162	1.73016	0.293233
CPEB2_ENST00000538197	0.195402	0.729885	0.0747126	0.267717	0.102362	0.382353	0.242857	2.70213	0.0807453	0.17	0.635	0.195	0.267717	0.307087	1.14706	0.204819	1.73973	0.242236
CPN2	0.360656	0.595628	0.0437158	0.605505	0.0733945	0.121212	0.564103	1.47297	0.0457143	0.360656	0.595628	0.0437158	0.605505	0.0733945	0.121212	0.564103	1.47297	0.0457143
CPSF6	0.124088	0.824818	0.0510949	0.150442	0.0619469	0.411765	0.141667	4.70833	0.0538462	0.124088	0.824818	0.0510949	0.150442	0.0619469	0.411765	0.141667	4.70833	0.0538462
CPSF6_ENST00000435070	0.124088	0.824818	0.0510949	0.150442	0.0619469	0.411765	0.141667	4.70833	0.0538462	0.124088	0.824818	0.0510949	0.150442	0.0619469	0.411765	0.141667	4.70833	0.0538462
CREBBP	0.118508	0.739576	0.141917	0.160237	0.191889	1.19753	0.13444	2.83989	0.165388	0.115467	0.720599	0.163934	0.160237	0.227498	1.41975	0.13054	2.57908	0.196078
CRHR2	0.359155	0.612676	0.028169	0.586207	0.045977	0.0784314	0.56044	1.58182	0.0289855	0.359155	0.612676	0.028169	0.586207	0.045977	0.0784314	0.56044	1.58182	0.0289855
CRHR2_ENST00000348438	0.362963	0.607407	0.0296296	0.597561	0.0487805	0.0816327	0.569767	1.54717	0.0305344	0.362963	0.607407	0.0296296	0.597561	0.0487805	0.0816327	0.569767	1.54717	0.0305344
CRISPLD2	0.392523	0.598131	0.00934579	0.65625	0.015625	0.0238095	0.646154	1.48837	0.00943396	0.392523	0.598131	0.00934579	0.65625	0.015625	0.0238095	0.646154	1.48837	0.00943396
CRMP1	0.357664	0.609489	0.0328467	0.586826	0.0538922	0.0918367	0.556818	1.56075	0.0339623	0.356364	0.607273	0.0363636	0.586826	0.0598802	0.102041	0.553672	1.5463	0.0377358
CRP	0.440678	0.550847	0.00847458	0.8	0.0153846	0.0192308	0.787879	1.22642	0.00854701	0.440678	0.550847	0.00847458	0.8	0.0153846	0.0192308	0.787879	1.22642	0.00854701
CRTC1	0.270115	0.706897	0.0229885	0.382114	0.0325203	0.0851064	0.370079	2.41176	0.0235294	0.231527	0.605911	0.162562	0.382114	0.268293	0.702128	0.301282	1.5375	0.194118
CRTC1_ENST00000338797	0.262857	0.714286	0.0228571	0.368	0.032	0.0869565	0.356589	2.5	0.0233918	0.226601	0.615764	0.157635	0.368	0.256	0.695652	0.292994	1.60256	0.187135
CSNK2A1	0.141667	0.675	0.183333	0.209877	0.271605	1.29412	0.165049	2.07692	0.22449	0.141667	0.675	0.183333	0.209877	0.271605	1.29412	0.165049	2.07692	0.22449
CTCF	0.0833333	0.74187	0.174797	0.112329	0.235616	2.09756	0.0909091	2.87402	0.211823	0.0759259	0.675926	0.248148	0.112329	0.367123	3.26829	0.0821643	2.08571	0.330049
CTLA4										0.161905	0.685714	0.152381	0.236111	0.222222	0.941176	0.193182	2.18182	0.179775
CTNNB1	0.0142971	0.971803	0.0138999	0.0147119	0.0143032	0.972222	0.0145044	34.4648	0.0140959	0.0142914	0.971417	0.0142914	0.0147119	0.0147119	1	0.0144986	33.9861	0.0144986
CTNND1	0.140271	0.710407	0.149321	0.197452	0.210191	1.06452	0.163158	2.45312	0.175532	0.135965	0.688596	0.175439	0.197452	0.254777	1.29032	0.15736	2.21127	0.212766
CTNND1_ENST00000399050	0.131818	0.722727	0.145455	0.18239	0.201258	1.10345	0.151832	2.60656	0.170213	0.127753	0.700441	0.171806	0.18239	0.245283	1.34483	0.146465	2.33824	0.207447
CTSG	0.328467	0.583942	0.0875912	0.5625	0.15	0.266667	0.48913	1.40351	0.096	0.328467	0.583942	0.0875912	0.5625	0.15	0.266667	0.48913	1.40351	0.096
CUL3	0.111498	0.790941	0.097561	0.140969	0.123348	0.875	0.12549	3.78333	0.108108	0.111111	0.788194	0.100694	0.140969	0.127753	0.90625	0.125	3.72131	0.111969
CWF19L2_ENST00000282251	0.150289	0.757225	0.0924855	0.198473	0.122137	0.615385	0.176871	3.11905	0.101911	0.140541	0.708108	0.151351	0.198473	0.21374	1.07692	0.163522	2.42593	0.178344
CX3CR1	0.388889	0.583333	0.0277778	0.666667	0.047619	0.0714286	0.636364	1.4	0.0285714	0.388889	0.583333	0.0277778	0.666667	0.047619	0.0714286	0.636364	1.4	0.0285714
CX3CR1_ENST00000358309	0.373239	0.598592	0.028169	0.623529	0.0470588	0.0754717	0.595506	1.49123	0.0289855	0.373239	0.598592	0.028169	0.623529	0.0470588	0.0754717	0.595506	1.49123	0.0289855
CXorf30	0.138158	0.815789	0.0460526	0.169355	0.0564516	0.333333	0.160305	4.42857	0.0482759	0.138158	0.815789	0.0460526	0.169355	0.0564516	0.333333	0.160305	4.42857	0.0482759
CXorf30_ENST00000378657	0.130719	0.816993	0.0522876	0.16	0.064	0.4	0.150376	4.46429	0.0551724	0.130719	0.816993	0.0522876	0.16	0.064	0.4	0.150376	4.46429	0.0551724
CXXC1	0.132184	0.83908	0.0287356	0.157534	0.0342466	0.217391	0.152318	5.21429	0.0295858	0.130682	0.829545	0.0397727	0.157534	0.0479452	0.304348	0.150327	4.86667	0.0414201
CYLD	0.183036	0.633929	0.183036	0.288732	0.288732	1	0.224044	1.73171	0.224044	0.172996	0.599156	0.227848	0.288732	0.380282	1.31707	0.209184	1.49474	0.295082
CYLD_ENST00000427738	0.179245	0.679245	0.141509	0.263889	0.208333	0.789474	0.218391	2.11765	0.164835	0.179245	0.679245	0.141509	0.263889	0.208333	0.789474	0.218391	2.11765	0.164835
CYP27A1	0.416	0.56	0.024	0.742857	0.0428571	0.0576923	0.712329	1.27273	0.0245902	0.416	0.56	0.024	0.742857	0.0428571	0.0576923	0.712329	1.27273	0.0245902
CYP39A1	0.118812	0.831683	0.049505	0.142857	0.0595238	0.416667	0.134831	4.94118	0.0520833	0.118812	0.831683	0.049505	0.142857	0.0595238	0.416667	0.134831	4.94118	0.0520833
CYP4F11	0.366379	0.603448	0.0301724	0.607143	0.05	0.0823529	0.578231	1.52174	0.0311111	0.366379	0.603448	0.0301724	0.607143	0.05	0.0823529	0.578231	1.52174	0.0311111
CYP4F2	0.357798	0.605505	0.0366972	0.590909	0.0606061	0.102564	0.557143	1.53488	0.0380952	0.357798	0.605505	0.0366972	0.590909	0.0606061	0.102564	0.557143	1.53488	0.0380952
DAGLB	0.384146	0.591463	0.0243902	0.649485	0.0412371	0.0634921	0.623762	1.44776	0.025	0.384146	0.591463	0.0243902	0.649485	0.0412371	0.0634921	0.623762	1.44776	0.025
DAXX	0.162252	0.711921	0.125828	0.227907	0.176744	0.77551	0.193676	2.47126	0.143939	0.157051	0.689103	0.153846	0.227907	0.223256	0.979592	0.186312	2.21649	0.181818
DAZAP1	0.216216	0.702703	0.0810811	0.307692	0.115385	0.375	0.275862	2.36364	0.0882353	0.179104	0.58209	0.238806	0.307692	0.410256	1.33333	0.218182	1.39286	0.313725
DDO	0.304	0.592	0.104	0.513514	0.175676	0.342105	0.436782	1.45098	0.116071	0.299213	0.582677	0.11811	0.513514	0.202703	0.394737	0.426966	1.39623	0.133929
DDX17	0.132075	0.823899	0.0440252	0.160305	0.0534351	0.333333	0.152174	4.67857	0.0460526	0.117978	0.735955	0.146067	0.160305	0.198473	1.2381	0.133758	2.78723	0.171053
DDX17_ENST00000381633	0.125874	0.832168	0.041958	0.151261	0.0504202	0.333333	0.144	4.95833	0.0437956	0.111111	0.734568	0.154321	0.151261	0.210084	1.38889	0.125	2.76744	0.182482
DDX26B										0.22	0.61	0.17	0.360656	0.278689	0.772727	0.282051	1.5641	0.204819
DDX26B_ENST00000370752	0.256684	0.684492	0.0588235	0.375	0.0859375	0.229167	0.345324	2.16949	0.0625	0.23301	0.621359	0.145631	0.375	0.234375	0.625	0.303797	1.64103	0.170455
DDX27	0.2	0.748718	0.0512821	0.267123	0.0684932	0.25641	0.25	2.97959	0.0540541	0.172566	0.646018	0.181416	0.267123	0.280822	1.05128	0.208556	1.825	0.221622
DDX3X	0.0992908	0.822695	0.0780142	0.12069	0.0948276	0.785714	0.110236	4.64	0.0846154	0.0989399	0.819788	0.0812721	0.12069	0.0991379	0.821429	0.109804	4.54902	0.0884615
DDX4	0.117647	0.782353	0.1	0.150376	0.12782	0.85	0.133333	3.59459	0.111111	0.117647	0.782353	0.1	0.150376	0.12782	0.85	0.133333	3.59459	0.111111
DDX4_ENST00000505374	0.117284	0.783951	0.0987654	0.149606	0.125984	0.842105	0.132867	3.62857	0.109589	0.117284	0.783951	0.0987654	0.149606	0.125984	0.842105	0.132867	3.62857	0.109589
DDX4_ENST00000511853	0.115385	0.8	0.0846154	0.144231	0.105769	0.733333	0.130435	4	0.092437	0.115385	0.8	0.0846154	0.144231	0.105769	0.733333	0.130435	4	0.092437
DENND1A_ENST00000373618	0.372549	0.578431	0.0490196	0.644068	0.0847458	0.131579	0.59375	1.37209	0.0515464	0.372549	0.578431	0.0490196	0.644068	0.0847458	0.131579	0.59375	1.37209	0.0515464
DENND1A_ENST00000373620	0.372881	0.584746	0.0423729	0.637681	0.0724638	0.113636	0.594595	1.40816	0.0442478	0.372881	0.584746	0.0423729	0.637681	0.0724638	0.113636	0.594595	1.40816	0.0442478
DENND4C	0.142292	0.837945	0.0197628	0.169811	0.0235849	0.138889	0.165899	5.17073	0.0201613	0.141176	0.831373	0.027451	0.169811	0.0330189	0.194444	0.164384	4.93023	0.0282258
DFNA5	0.36	0.584	0.056	0.616438	0.0958904	0.155556	0.5625	1.40385	0.059322	0.357143	0.579365	0.0634921	0.616438	0.109589	0.177778	0.555556	1.37736	0.0677966
DHCR7	0.397059	0.588235	0.0147059	0.675	0.025	0.037037	0.658537	1.42857	0.0149254	0.397059	0.588235	0.0147059	0.675	0.025	0.037037	0.658537	1.42857	0.0149254
DHCR7_ENST00000355527	0.4	0.584615	0.0153846	0.684211	0.0263158	0.0384615	0.666667	1.40741	0.015625	0.4	0.584615	0.0153846	0.684211	0.0263158	0.0384615	0.666667	1.40741	0.015625
DHRS2	0.353982	0.60177	0.0442478	0.588235	0.0735294	0.125	0.547945	1.51111	0.0462963	0.353982	0.60177	0.0442478	0.588235	0.0735294	0.125	0.547945	1.51111	0.0462963
DHRS2_ENST00000344777	0.362069	0.586207	0.0517241	0.617647	0.0882353	0.142857	0.567568	1.41667	0.0545455	0.362069	0.586207	0.0517241	0.617647	0.0882353	0.142857	0.567568	1.41667	0.0545455
DHX16	0.217822	0.663366	0.118812	0.328358	0.179104	0.545455	0.278481	1.97059	0.134831	0.199095	0.606335	0.19457	0.328358	0.320896	0.977273	0.248588	1.54023	0.241573
DHX16_ENST00000376437										0.20354	0.566372	0.230088	0.359375	0.40625	1.13043	0.255556	1.30612	0.298851
DHX16_ENST00000376442	0.229665	0.655502	0.114833	0.350365	0.175182	0.5	0.298137	1.90278	0.12973	0.210526	0.600877	0.188596	0.350365	0.313869	0.895833	0.266667	1.50549	0.232432
DICER1	0.111386	0.829208	0.0594059	0.134328	0.0716418	0.533333	0.125348	4.85507	0.0631579	0.110974	0.826141	0.0628853	0.134328	0.0761194	0.566667	0.124827	4.75177	0.0671053
DIRAS3	0.359223	0.621359	0.0194175	0.578125	0.03125	0.0540541	0.560606	1.64103	0.019802	0.359223	0.621359	0.0194175	0.578125	0.03125	0.0540541	0.560606	1.64103	0.019802
DIS3	0.111821	0.833866	0.0543131	0.1341	0.0651341	0.485714	0.125899	5.01923	0.0574324	0.109718	0.818182	0.0721003	0.1341	0.0881226	0.657143	0.123239	4.5	0.0777027
DLAT	0.178571	0.794643	0.0267857	0.224719	0.0337079	0.15	0.217391	3.86957	0.0275229	0.155039	0.689922	0.155039	0.224719	0.224719	1	0.183486	2.225	0.183486
DLL1	0.361111	0.606481	0.0324074	0.59542	0.0534351	0.0897436	0.565217	1.54118	0.0334928	0.357798	0.600917	0.0412844	0.59542	0.0687023	0.115385	0.557143	1.50575	0.0430622
DMRT3	0.378531	0.587571	0.0338983	0.644231	0.0576923	0.0895522	0.609091	1.42466	0.0350877	0.376404	0.58427	0.0393258	0.644231	0.0673077	0.104478	0.603604	1.40541	0.0409357
DMRTB1	0.347826	0.623188	0.0289855	0.55814	0.0465116	0.0833333	0.533333	1.65385	0.0298507	0.326531	0.585034	0.0884354	0.55814	0.151163	0.270833	0.484848	1.40984	0.0970149
DNA2	0.222222	0.753086	0.0246914	0.295082	0.0327869	0.111111	0.285714	3.05	0.0253165	0.194595	0.659459	0.145946	0.295082	0.221311	0.75	0.241611	1.93651	0.170886
DNAJC11	0.323077	0.584615	0.0923077	0.552632	0.157895	0.285714	0.477273	1.40741	0.101695	0.315789	0.571429	0.112782	0.552632	0.197368	0.357143	0.461538	1.33333	0.127119
DNAJC2	0.201754	0.710526	0.0877193	0.283951	0.123457	0.434783	0.252747	2.45455	0.0961538	0.186992	0.658537	0.154472	0.283951	0.234568	0.826087	0.23	1.92857	0.182692
DNMT3A	0.103325	0.81829	0.0783848	0.12627	0.095791	0.758621	0.115232	4.50327	0.0850515	0.0998852	0.791045	0.10907	0.12627	0.137881	1.09195	0.110969	3.78571	0.122423
DOCK3	0.237062	0.716194	0.0467446	0.331002	0.0652681	0.197183	0.310722	2.52353	0.0490368	0.212575	0.642216	0.14521	0.331002	0.226107	0.683099	0.269962	1.79498	0.169877
DOCK3_ENST00000266037	0.234921	0.71746	0.047619	0.327434	0.0663717	0.202703	0.307054	2.53933	0.05	0.211429	0.645714	0.142857	0.327434	0.221239	0.675676	0.268116	1.82258	0.166667
DRD2	0.357143	0.637363	0.00549451	0.560345	0.00862069	0.0153846	0.555556	1.75758	0.00552486	0.357143	0.637363	0.00549451	0.560345	0.00862069	0.0153846	0.555556	1.75758	0.00552486
DRD2_ENST00000355319	0.372222	0.622222	0.00555556	0.598214	0.00892857	0.0149254	0.59292	1.64706	0.00558659	0.372222	0.622222	0.00555556	0.598214	0.00892857	0.0149254	0.59292	1.64706	0.00558659
DUSP16	0.262821	0.487179	0.25	0.539474	0.513158	0.95122	0.356522	0.95	0.333333	0.262821	0.487179	0.25	0.539474	0.513158	0.95122	0.356522	0.95	0.333333
DUX4L1	0	0.982759	0.0172414	0	0.0175439	#DIV/0!	0	57	0.0175439	0	0.982759	0.0172414	0	0.0175439	#DIV/0!	0	57	0.0175439
DUX4L2	0	1	0	0	0	#DIV/0!	0	#DIV/0!	0	0	1	0	0	0	#DIV/0!	0	#DIV/0!	0
DYNC1I2	0.19802	0.742574	0.0594059	0.266667	0.08	0.3	0.246914	2.88462	0.0631579	0.162602	0.609756	0.227642	0.266667	0.373333	1.4	0.194175	1.5625	0.294737
DYNC1LI1										0.273585	0.575472	0.150943	0.47541	0.262295	0.551724	0.376623	1.35556	0.177778
DYRK1A	0.300412	0.576132	0.123457	0.521429	0.214286	0.410959	0.429412	1.35922	0.140845	0.300412	0.576132	0.123457	0.521429	0.214286	0.410959	0.429412	1.35922	0.140845
DYRK1A_ENST00000338785	0.132353	0.676471	0.191176	0.195652	0.282609	1.44444	0.152542	2.09091	0.236364	0.132353	0.676471	0.191176	0.195652	0.282609	1.44444	0.152542	2.09091	0.236364
EDIL3	0.165854	0.707317	0.126829	0.234483	0.17931	0.764706	0.19883	2.41667	0.145251	0.165854	0.707317	0.126829	0.234483	0.17931	0.764706	0.19883	2.41667	0.145251
EED	0.104478	0.813433	0.0820896	0.12844	0.100917	0.785714	0.116667	4.36	0.0894309	0.104478	0.813433	0.0820896	0.12844	0.100917	0.785714	0.116667	4.36	0.0894309
EEF1D	0.387097	0.604839	0.00806452	0.64	0.0133333	0.0208333	0.631579	1.53061	0.00813008	0.380952	0.595238	0.0238095	0.64	0.04	0.0625	0.615385	1.47059	0.0243902
EEF1D_ENST00000423316	0.404762	0.587302	0.00793651	0.689189	0.0135135	0.0196078	0.68	1.42308	0.008	0.404762	0.587302	0.00793651	0.689189	0.0135135	0.0196078	0.68	1.42308	0.008
EFHA2	0.109489	0.766423	0.124088	0.142857	0.161905	1.13333	0.122951	3.28125	0.141667	0.108696	0.76087	0.130435	0.142857	0.171429	1.2	0.121951	3.18182	0.15
EGFR	0.0814815	0.906349	0.0121693	0.0899008	0.0134267	0.149351	0.0887097	9.67797	0.0123192	0.0813524	0.904913	0.0137348	0.0899008	0.0151781	0.168831	0.0885566	9.51667	0.0139261
EGFR_ENST00000342916	0.113971	0.875	0.0110294	0.130252	0.012605	0.0967742	0.128631	7	0.0111524	0.113971	0.875	0.0110294	0.130252	0.012605	0.0967742	0.128631	7	0.0111524
EGFR_ENST00000344576	0.14786	0.836576	0.0155642	0.176744	0.0186047	0.105263	0.173516	5.11905	0.0158103	0.147573	0.834951	0.0174757	0.176744	0.0209302	0.118421	0.173121	5.05882	0.0177866
EGFR_ENST00000442591	0.122867	0.863481	0.0136519	0.142292	0.0158103	0.111111	0.140078	6.325	0.0138408	0.122867	0.863481	0.0136519	0.142292	0.0158103	0.111111	0.140078	6.325	0.0138408
EGR4	0.394495	0.577982	0.0275229	0.68254	0.047619	0.0697674	0.651515	1.36957	0.0283019	0.394495	0.577982	0.0275229	0.68254	0.047619	0.0697674	0.651515	1.36957	0.0283019
EHD1	0.365517	0.606897	0.0275862	0.602273	0.0454545	0.0754717	0.576087	1.54386	0.0283688	0.360544	0.598639	0.0408163	0.602273	0.0681818	0.113208	0.56383	1.49153	0.0425532
EHD3	0.389744	0.579487	0.0307692	0.672566	0.0530973	0.0789474	0.638655	1.37805	0.031746	0.389744	0.579487	0.0307692	0.672566	0.0530973	0.0789474	0.638655	1.37805	0.031746
EHD4	0.377778	0.577778	0.0444444	0.653846	0.0769231	0.117647	0.607143	1.36842	0.0465116	0.366906	0.561151	0.0719424	0.653846	0.128205	0.196078	0.579545	1.27869	0.0775194
EIF1AX	0.0396825	0.928571	0.031746	0.042735	0.034188	0.8	0.0413223	13	0.0327869	0.0396825	0.928571	0.031746	0.042735	0.034188	0.8	0.0413223	13	0.0327869
EIF2AK1	0.227848	0.639241	0.132911	0.356436	0.207921	0.583333	0.295082	1.77193	0.153285	0.215569	0.60479	0.179641	0.356436	0.29703	0.833333	0.274809	1.5303	0.218978
EIF2AK1_ENST00000536084	0.224	0.616	0.16	0.363636	0.25974	0.714286	0.28866	1.60417	0.190476	0.208955	0.574627	0.216418	0.363636	0.376623	1.03571	0.264151	1.35088	0.27619
EME2	0.368932	0.563107	0.0679612	0.655172	0.12069	0.184211	0.584615	1.28889	0.0729167	0.365385	0.557692	0.0769231	0.655172	0.137931	0.210526	0.575758	1.26087	0.0833333
EME2_ENST00000307394	0.401961	0.578431	0.0196078	0.694915	0.0338983	0.0487805	0.672131	1.37209	0.02	0.398058	0.572816	0.0291262	0.694915	0.0508475	0.0731707	0.66129	1.34091	0.03
ENG	0.412281	0.535088	0.0526316	0.770492	0.0983607	0.12766	0.701493	1.15094	0.0555556	0.405172	0.525862	0.0689655	0.770492	0.131148	0.170213	0.681159	1.10909	0.0740741
ENG_ENST00000373203	0.389381	0.557522	0.0530973	0.698413	0.0952381	0.136364	0.637681	1.26	0.0560748	0.389381	0.557522	0.0530973	0.698413	0.0952381	0.136364	0.637681	1.26	0.0560748
ENPP4	0.140741	0.82963	0.0296296	0.169643	0.0357143	0.210526	0.163793	4.86957	0.0305344	0.140741	0.82963	0.0296296	0.169643	0.0357143	0.210526	0.163793	4.86957	0.0305344
ENPP7	0.362573	0.608187	0.0292398	0.596154	0.0480769	0.0806452	0.568807	1.55224	0.0301205	0.362573	0.608187	0.0292398	0.596154	0.0480769	0.0806452	0.568807	1.55224	0.0301205
ENSG00000174501	0.131387	0.843066	0.0255474	0.155844	0.030303	0.194444	0.151261	5.37209	0.0262172	0.131387	0.843066	0.0255474	0.155844	0.030303	0.194444	0.151261	5.37209	0.0262172
ENSG00000198064	0.386555	0.613445	0	0.630137	0	0	0.630137	1.58696	0	0.386555	0.613445	0	0.630137	0	0	0.630137	1.58696	0
ENSG00000226807	0.357143	0.609023	0.0338346	0.58642	0.0555556	0.0947368	0.555556	1.55769	0.0350195	0.35316	0.60223	0.0446097	0.58642	0.0740741	0.126316	0.545977	1.51402	0.0466926
ENTPD2	0.481481	0.481481	0.037037	1	0.0769231	0.0769231	0.928571	0.928571	0.0384615	0.448276	0.448276	0.103448	1	0.230769	0.230769	0.8125	0.8125	0.115385
EP300	0.0795974	0.78957	0.130833	0.100811	0.165701	1.64368	0.0864811	3.75217	0.150526	0.0778872	0.772605	0.149508	0.100811	0.193511	1.91954	0.084466	3.39764	0.175789
EPB41L5	0.184932	0.705479	0.109589	0.262136	0.15534	0.592593	0.226891	2.39535	0.123077	0.176471	0.673203	0.150327	0.262136	0.223301	0.851852	0.214286	2.06	0.176923
EPB41L5_ENST00000443124										0.144231	0.673077	0.182692	0.214286	0.271429	1.26667	0.168539	2.05882	0.223529
EPHA3_ENST00000452448	0.112051	0.788584	0.0993658	0.142091	0.126005	0.886792	0.12619	3.73	0.110329	0.111814	0.78692	0.101266	0.142091	0.128686	0.90566	0.125891	3.69307	0.112676
EPHB2_ENST00000374627	0.356401	0.629758	0.0138408	0.565934	0.021978	0.038835	0.553763	1.70093	0.0140351	0.356401	0.629758	0.0138408	0.565934	0.021978	0.038835	0.553763	1.70093	0.0140351
EPYC	0.235849	0.650943	0.113208	0.362319	0.173913	0.48	0.308642	1.86486	0.12766	0.235849	0.650943	0.113208	0.362319	0.173913	0.48	0.308642	1.86486	0.12766
ERBB2	0.0897833	0.895769	0.0144479	0.10023	0.016129	0.16092	0.0986395	8.59406	0.0146597	0.0893224	0.89117	0.0195072	0.10023	0.0218894	0.218391	0.0980834	8.18868	0.0198953
ERBB2_ENST00000541774	0.0692042	0.918685	0.0121107	0.0753296	0.0131827	0.175	0.0743494	11.2979	0.0122592	0.0692042	0.918685	0.0121107	0.0753296	0.0131827	0.175	0.0743494	11.2979	0.0122592
ERBB3	0.100737	0.872236	0.027027	0.115493	0.0309859	0.268293	0.112022	6.82692	0.0277778	0.10049	0.870098	0.0294118	0.115493	0.0338028	0.292683	0.111717	6.69811	0.030303
ERBB3_ENST00000267101	0.0925684	0.886571	0.0208605	0.104412	0.0235294	0.225352	0.102011	7.81609	0.0213049	0.0924479	0.885417	0.0221354	0.104412	0.025	0.239437	0.101865	7.72727	0.0226365
ERBB3_ENST00000411731	0.0758621	0.889655	0.0344828	0.0852713	0.0387597	0.454545	0.0820896	8.0625	0.0357143	0.0758621	0.889655	0.0344828	0.0852713	0.0387597	0.454545	0.0820896	8.0625	0.0357143
ERBB4	0.112807	0.812553	0.0746395	0.138831	0.091858	0.661654	0.127151	4.33484	0.0806599	0.112712	0.811864	0.0754237	0.138831	0.0929019	0.669173	0.12703	4.31532	0.0815765
ERBB4_ENST00000402597	0.116194	0.806953	0.0768527	0.143991	0.0952381	0.661417	0.13147	4.18009	0.0832507	0.116194	0.806953	0.0768527	0.143991	0.0952381	0.661417	0.13147	4.18009	0.0832507
ERCC2_ENST00000391945	0.114613	0.873926	0.0114613	0.131148	0.0131148	0.1	0.12945	6.93182	0.0115942	0.114613	0.873926	0.0114613	0.131148	0.0131148	0.1	0.12945	6.93182	0.0115942
ERCC2_ENST00000485403	0.0652174	0.929348	0.00543478	0.0701754	0.00584795	0.0833333	0.0697674	13.1538	0.00546448	0.0652174	0.929348	0.00543478	0.0701754	0.00584795	0.0833333	0.0697674	13.1538	0.00546448
ERLEC1	0.158416	0.821782	0.019802	0.192771	0.0240964	0.125	0.188235	4.61111	0.020202	0.158416	0.821782	0.019802	0.192771	0.0240964	0.125	0.188235	4.61111	0.020202
ERRFI1	0.122137	0.801527	0.0763359	0.152381	0.0952381	0.625	0.13913	4.03846	0.0826446	0.112676	0.739437	0.147887	0.152381	0.2	1.3125	0.126984	2.83784	0.173554
ESR1	0.105058	0.867704	0.0272374	0.121076	0.0313901	0.259259	0.117391	6.55882	0.028	0.104854	0.866019	0.0291262	0.121076	0.0336323	0.277778	0.117137	6.46377	0.03
ESRP1	0.206186	0.721649	0.0721649	0.285714	0.1	0.35	0.25974	2.59259	0.0777778	0.167364	0.585774	0.246862	0.285714	0.421429	1.475	0.201005	1.41414	0.327778
ESRP1_ENST00000433389	0.205263	0.721053	0.0736842	0.284672	0.10219	0.358974	0.258278	2.58491	0.0795455	0.174107	0.611607	0.214286	0.284672	0.350365	1.23077	0.210811	1.57471	0.272727
ETV1	0.117424	0.829545	0.0530303	0.141553	0.0639269	0.451613	0.133047	4.86667	0.056	0.113971	0.805147	0.0808824	0.141553	0.100457	0.709677	0.128631	4.13208	0.088
ETV4_ENST00000319349	0.368932	0.572816	0.0582524	0.644068	0.101695	0.157895	0.584615	1.34091	0.0618557	0.368932	0.572816	0.0582524	0.644068	0.101695	0.157895	0.584615	1.34091	0.0618557
ETV6	0.114379	0.820261	0.0653595	0.139442	0.0796813	0.571429	0.129151	4.56364	0.0699301	0.11254	0.807074	0.0803859	0.139442	0.0996016	0.714286	0.126812	4.18333	0.0874126
EXOC1	0.117347	0.821429	0.0612245	0.142857	0.0745342	0.521739	0.132948	4.6	0.0652174	0.115578	0.809045	0.0753769	0.142857	0.0931677	0.652174	0.130682	4.23684	0.0815217
EXOSC9	0.221154	0.75	0.0288462	0.294872	0.0384615	0.130435	0.283951	3	0.029703	0.193277	0.655462	0.151261	0.294872	0.230769	0.782609	0.239583	1.90244	0.178218
EXT1	0.48368	0.489614	0.0267062	0.987879	0.0545455	0.0552147	0.936782	0.959302	0.027439	0.480826	0.486726	0.0324484	0.987879	0.0666667	0.0674847	0.926136	0.948276	0.0335366
EZH2	0.0792291	0.862955	0.0578158	0.0918114	0.0669975	0.72973	0.0860465	6.29687	0.0613636	0.0782241	0.852008	0.0697674	0.0918114	0.0818859	0.891892	0.0848624	5.75714	0.075
EZH2_ENST00000350995	0.0902439	0.853659	0.0560976	0.105714	0.0657143	0.621622	0.0991957	5.83333	0.0594315	0.0895884	0.847458	0.062954	0.105714	0.0742857	0.702703	0.0984043	5.55556	0.0671835
FAM108A1	0.509259	0.490741	0	1.03774	0	0	1.03774	0.963636	0	0.509259	0.490741	0	1.03774	0	0	1.03774	0.963636	0
FAM123B_ENST00000330258	0.0955519	0.621087	0.283361	0.153846	0.456233	2.96552	0.105647	1.63913	0.395402	0.0941558	0.612013	0.293831	0.153846	0.480106	3.12069	0.103943	1.57741	0.416092
FAM126A	0.183333	0.691667	0.125	0.26506	0.180723	0.681818	0.22449	2.24324	0.142857	0.183333	0.691667	0.125	0.26506	0.180723	0.681818	0.22449	2.24324	0.142857
FAM181A	0.354331	0.606299	0.0393701	0.584416	0.0649351	0.111111	0.54878	1.54	0.0409836	0.354331	0.606299	0.0393701	0.584416	0.0649351	0.111111	0.54878	1.54	0.0409836
FAM39B	0.422535	0.570423	0.00704225	0.740741	0.0123457	0.0166667	0.731707	1.32787	0.0070922	0.422535	0.570423	0.00704225	0.740741	0.0123457	0.0166667	0.731707	1.32787	0.0070922
FAM55A	0.116788	0.854015	0.0291971	0.136752	0.034188	0.25	0.132231	5.85	0.0300752	0.116788	0.854015	0.0291971	0.136752	0.034188	0.25	0.132231	5.85	0.0300752
FAM82A1										0.194444	0.648148	0.157407	0.3	0.242857	0.809524	0.241379	1.84211	0.186813
FANCC_ENST00000289081	0.138728	0.820809	0.0404624	0.169014	0.0492958	0.291667	0.161074	4.58065	0.0421687	0.137143	0.811429	0.0514286	0.169014	0.0633803	0.375	0.15894	4.30303	0.0542169
FAR2	0.253968	0.722222	0.0238095	0.351648	0.032967	0.09375	0.340426	2.6	0.0243902	0.22069	0.627586	0.151724	0.351648	0.241758	0.6875	0.283186	1.68519	0.178862
FAS	0.190909	0.672727	0.136364	0.283784	0.202703	0.714286	0.235955	2.05556	0.157895	0.184211	0.649123	0.166667	0.283784	0.256757	0.904762	0.225806	1.85	0.2
FASTK	0.358491	0.632075	0.00943396	0.567164	0.0149254	0.0263158	0.558824	1.71795	0.00952381	0.35514	0.626168	0.0186916	0.567164	0.0298507	0.0526316	0.550725	1.675	0.0190476
FAT	0.149777	0.693764	0.156459	0.215891	0.225522	1.04461	0.176162	2.26545	0.185479	0.148866	0.689541	0.161594	0.215891	0.23435	1.0855	0.174902	2.22103	0.192739
FAT1	0.149165	0.690361	0.160474	0.216069	0.232449	1.07581	0.175316	2.22957	0.191148	0.148049	0.685195	0.166756	0.216069	0.24337	1.12635	0.173777	2.17657	0.200128
FBRS_ENST00000356166	0.368852	0.57377	0.057377	0.642857	0.1	0.155556	0.584416	1.34615	0.0608696	0.368852	0.57377	0.057377	0.642857	0.1	0.155556	0.584416	1.34615	0.0608696
FBXL18	0.364583	0.625	0.0104167	0.583333	0.0166667	0.0285714	0.57377	1.66667	0.0105263	0.364583	0.625	0.0104167	0.583333	0.0166667	0.0285714	0.57377	1.66667	0.0105263
FBXL18_ENST00000382368	0.360577	0.629808	0.00961538	0.572519	0.0152672	0.0266667	0.56391	1.7013	0.00970874	0.360577	0.629808	0.00961538	0.572519	0.0152672	0.0266667	0.56391	1.7013	0.00970874
FBXL18_ENST00000453700	0.362245	0.622449	0.0153061	0.581967	0.0245902	0.0422535	0.568	1.64865	0.015544	0.362245	0.622449	0.0153061	0.581967	0.0245902	0.0422535	0.568	1.64865	0.015544
FBXO11	0.138462	0.830769	0.0307692	0.166667	0.037037	0.222222	0.160714	4.90909	0.031746	0.138462	0.830769	0.0307692	0.166667	0.037037	0.222222	0.160714	4.90909	0.031746
FBXO11_ENST00000403359	0.134328	0.81592	0.0497512	0.164634	0.0609756	0.37037	0.155172	4.43243	0.052356	0.134328	0.81592	0.0497512	0.164634	0.0609756	0.37037	0.155172	4.43243	0.052356
FBXO7	0.350427	0.589744	0.0598291	0.594203	0.101449	0.170732	0.539474	1.4375	0.0636364	0.350427	0.589744	0.0598291	0.594203	0.101449	0.170732	0.539474	1.4375	0.0636364
FBXO7_ENST00000266087	0.353448	0.586207	0.0603448	0.602941	0.102941	0.170732	0.546667	1.41667	0.0642202	0.353448	0.586207	0.0603448	0.602941	0.102941	0.170732	0.546667	1.41667	0.0642202
FBXO7_ENST00000382058	0.383178	0.560748	0.0560748	0.683333	0.1	0.146341	0.621212	1.2766	0.0594059	0.383178	0.560748	0.0560748	0.683333	0.1	0.146341	0.621212	1.2766	0.0594059
FBXW2_ENST00000373926	0.466102	0.516949	0.0169492	0.901639	0.0327869	0.0363636	0.873016	1.07018	0.0172414	0.466102	0.516949	0.0169492	0.901639	0.0327869	0.0363636	0.873016	1.07018	0.0172414
FBXW7	0.027027	0.804054	0.168919	0.0336134	0.210084	6.25	0.0277778	4.10345	0.203252	0.0264317	0.786344	0.187225	0.0336134	0.238095	7.08333	0.0271493	3.68041	0.230352
FBXW7_ENST00000281708	0.0311388	0.798043	0.170819	0.039019	0.214047	5.48571	0.0321396	3.95154	0.206009	0.0303819	0.778646	0.190972	0.039019	0.245262	6.28571	0.0313339	3.51765	0.236052
FBXW7_ENST00000296555	0.0304519	0.804519	0.165029	0.037851	0.205128	5.41935	0.0314083	4.11558	0.197647	0.0297505	0.785988	0.184261	0.037851	0.234432	6.19355	0.0306627	3.67265	0.225882
FBXW7_ENST00000393956	0.00890869	0.859688	0.131403	0.0103627	0.15285	14.75	0.00898876	6.12698	0.151282	0.00890869	0.859688	0.131403	0.0103627	0.15285	14.75	0.00898876	6.12698	0.151282
FBXW7_ENST00000534231	0.0278884	0.817729	0.154382	0.0341048	0.188794	5.53571	0.0286885	4.48634	0.182568	0.0271318	0.795543	0.177326	0.0341048	0.222899	6.53571	0.0278884	3.891	0.215548
FBXW7_NM_018315_2	0.0370028	0.802035	0.160962	0.0461361	0.200692	4.35	0.0384246	4.0514	0.191841	0.0359712	0.779676	0.184353	0.0461361	0.236448	5.125	0.0373134	3.53878	0.22602
FCHO2	0.218487	0.697479	0.0840336	0.313253	0.120482	0.384615	0.27957	2.30556	0.0917431	0.20155	0.643411	0.155039	0.313253	0.240964	0.769231	0.252427	1.80435	0.183486
FCN2	0.370079	0.614173	0.015748	0.602564	0.025641	0.0425532	0.5875	1.59184	0.016	0.350746	0.58209	0.0671642	0.602564	0.115385	0.191489	0.54023	1.39286	0.072
FDXACB1	0.322581	0.58871	0.0887097	0.547945	0.150685	0.275	0.47619	1.43137	0.0973451	0.322581	0.58871	0.0887097	0.547945	0.150685	0.275	0.47619	1.43137	0.0973451
FEM1A	0.373913	0.573913	0.0521739	0.651515	0.0909091	0.139535	0.597222	1.34694	0.0550459	0.373913	0.573913	0.0521739	0.651515	0.0909091	0.139535	0.597222	1.34694	0.0550459
FETUB	0.203125	0.765625	0.03125	0.265306	0.0408163	0.153846	0.254902	3.26667	0.0322581	0.173333	0.653333	0.173333	0.265306	0.265306	1	0.209677	1.88462	0.209677
FGD4	0.197368	0.677632	0.125	0.291262	0.184466	0.633333	0.245902	2.10204	0.142857	0.196078	0.673203	0.130719	0.291262	0.194175	0.666667	0.243902	2.06	0.150376
FGF14_ENST00000376143	0.175439	0.815789	0.00877193	0.215054	0.0107527	0.05	0.212766	4.42857	0.00884956	0.175439	0.815789	0.00877193	0.215054	0.0107527	0.05	0.212766	4.42857	0.00884956
FGF3	0.14966	0.823129	0.0272109	0.181818	0.0330579	0.181818	0.176	4.65385	0.027972	0.14966	0.823129	0.0272109	0.181818	0.0330579	0.181818	0.176	4.65385	0.027972
FGFR2	0.106383	0.864157	0.0294599	0.123106	0.0340909	0.276923	0.119048	6.36145	0.0303541	0.106383	0.864157	0.0294599	0.123106	0.0340909	0.276923	0.119048	6.36145	0.0303541
FGFR2_ENST00000351936	0.114519	0.854806	0.0306748	0.133971	0.0358852	0.267857	0.12933	5.88732	0.0316456	0.114519	0.854806	0.0306748	0.133971	0.0358852	0.267857	0.12933	5.88732	0.0316456
FGFR2_ENST00000357555	0.103448	0.862069	0.0344828	0.12	0.04	0.333333	0.115385	6.25	0.0357143	0.103448	0.862069	0.0344828	0.12	0.04	0.333333	0.115385	6.25	0.0357143
FGFR2_ENST00000369056	0.104651	0.860465	0.0348837	0.121622	0.0405405	0.333333	0.116883	6.16667	0.0361446	0.104651	0.860465	0.0348837	0.121622	0.0405405	0.333333	0.116883	6.16667	0.0361446
FGFR2_ENST00000457416	0.111562	0.855984	0.0324544	0.130332	0.0379147	0.290909	0.125571	5.94366	0.033543	0.111562	0.855984	0.0324544	0.130332	0.0379147	0.290909	0.125571	5.94366	0.033543
FGFR3	0.0700935	0.928349	0.00155763	0.0755034	0.00167785	0.0222222	0.0753769	12.9565	0.00156006	0.0698758	0.925466	0.00465839	0.0755034	0.00503356	0.0666667	0.0751252	12.4167	0.00468019
FGFR3_ENST00000340107	0.130217	0.864775	0.00500835	0.150579	0.00579151	0.0384615	0.149712	6.39506	0.00503356	0.129568	0.860465	0.00996678	0.150579	0.011583	0.0769231	0.148855	6.16667	0.0100671
FH	0.091954	0.862069	0.045977	0.106667	0.0533333	0.5	0.101266	6.25	0.0481928	0.091954	0.862069	0.045977	0.106667	0.0533333	0.5	0.101266	6.25	0.0481928
FLT3	0.101987	0.864901	0.0331126	0.117917	0.0382848	0.324675	0.113569	6.40196	0.0342466	0.101987	0.864901	0.0331126	0.117917	0.0382848	0.324675	0.113569	6.40196	0.0342466
FOXA1	0.132597	0.861878	0.00552486	0.153846	0.00641026	0.0416667	0.152866	6.24	0.00555556	0.132231	0.859504	0.00826446	0.153846	0.00961538	0.0625	0.152381	6.11765	0.00833333
FOXD4	0.390244	0.585366	0.0243902	0.666667	0.0416667	0.0625	0.64	1.41176	0.025	0.390244	0.585366	0.0243902	0.666667	0.0416667	0.0625	0.64	1.41176	0.025
FOXD4_ENST00000382500	0.361538	0.615385	0.0230769	0.5875	0.0375	0.0638298	0.566265	1.6	0.023622	0.361538	0.615385	0.0230769	0.5875	0.0375	0.0638298	0.566265	1.6	0.023622
FOXG1	0.46519	0.515823	0.0189873	0.90184	0.0368098	0.0408163	0.869822	1.06536	0.0193548	0.46519	0.515823	0.0189873	0.90184	0.0368098	0.0408163	0.869822	1.06536	0.0193548
FOXI1	0.385542	0.590361	0.0240964	0.653061	0.0408163	0.0625	0.627451	1.44118	0.0246914	0.380952	0.583333	0.0357143	0.653061	0.0612245	0.09375	0.615385	1.4	0.037037
FOXL2	0.0783582	0.914179	0.00746269	0.0857143	0.00816327	0.0952381	0.0850202	10.6522	0.0075188	0.0783582	0.914179	0.00746269	0.0857143	0.00816327	0.0952381	0.0850202	10.6522	0.0075188
FOXP1	0.178788	0.709091	0.112121	0.252137	0.15812	0.627119	0.217712	2.4375	0.12628	0.176647	0.700599	0.122754	0.252137	0.175214	0.694915	0.214545	2.34	0.139932
FOXP2	0.372014	0.580205	0.0477816	0.641176	0.0823529	0.12844	0.592391	1.38211	0.0501792	0.372014	0.580205	0.0477816	0.641176	0.0823529	0.12844	0.592391	1.38211	0.0501792
FOXP2_ENST00000393500	0.563758	0.402685	0.033557	1.4	0.0833333	0.0595238	1.29231	0.674157	0.0347222	0.563758	0.402685	0.033557	1.4	0.0833333	0.0595238	1.29231	0.674157	0.0347222
FOXP2_ENST00000403559	0.389961	0.563707	0.046332	0.691781	0.0821918	0.118812	0.639241	1.29204	0.048583	0.389961	0.563707	0.046332	0.691781	0.0821918	0.118812	0.639241	1.29204	0.048583
FRYL_ENST00000537810	0.139896	0.818653	0.0414508	0.170886	0.0506329	0.296296	0.162651	4.51429	0.0432432	0.139896	0.818653	0.0414508	0.170886	0.0506329	0.296296	0.162651	4.51429	0.0432432
FTSJD1	0.147651	0.731544	0.120805	0.201835	0.165138	0.818182	0.173228	2.725	0.137405	0.144737	0.717105	0.138158	0.201835	0.192661	0.954545	0.169231	2.53488	0.160305
FUBP1_ENST00000370767	0.139013	0.686099	0.174888	0.202614	0.254902	1.25806	0.161458	2.18571	0.211957	0.130802	0.64557	0.223629	0.202614	0.346405	1.70968	0.150485	1.82143	0.288043
FUBP1_ENST00000370768	0.134783	0.691304	0.173913	0.194969	0.251572	1.29032	0.155779	2.23944	0.210526	0.123506	0.633466	0.243028	0.194969	0.383648	1.96774	0.140909	1.72826	0.321053
FUBP1_ENST00000436586	0.140351	0.684211	0.175439	0.205128	0.25641	1.25	0.163265	2.16667	0.212766	0.132231	0.644628	0.22314	0.205128	0.346154	1.6875	0.152381	1.81395	0.287234
FUBP3	0.218487	0.672269	0.109244	0.325	0.1625	0.5	0.27957	2.05128	0.122642	0.204724	0.629921	0.165354	0.325	0.2625	0.807692	0.257426	1.70213	0.198113
FURIN	0.352941	0.602941	0.0441176	0.585366	0.0731707	0.125	0.545455	1.51852	0.0461538	0.349515	0.597087	0.0533981	0.585366	0.0894309	0.152778	0.537313	1.48193	0.0564103
FUS	0.380282	0.570423	0.0492958	0.666667	0.0864198	0.12963	0.613636	1.32787	0.0518519	0.377622	0.566434	0.0559441	0.666667	0.0987654	0.148148	0.606742	1.30645	0.0592593
FUS_ENST00000254108	0.388889	0.555556	0.0555556	0.7	0.1	0.142857	0.636364	1.25	0.0588235	0.388889	0.555556	0.0555556	0.7	0.1	0.142857	0.636364	1.25	0.0588235
FUT1	0.376623	0.603896	0.0194805	0.623656	0.0322581	0.0517241	0.604167	1.52459	0.0198675	0.374194	0.6	0.0258065	0.623656	0.0430108	0.0689655	0.597938	1.5	0.0264901
FXR1	0.205128	0.717949	0.0769231	0.285714	0.107143	0.375	0.258065	2.54545	0.0833333	0.186047	0.651163	0.162791	0.285714	0.25	0.875	0.228571	1.86667	0.194444
FXR2	0.238938	0.663717	0.0973451	0.36	0.146667	0.407407	0.313953	1.97368	0.107843	0.22314	0.619835	0.157025	0.36	0.253333	0.703704	0.287234	1.63043	0.186275
FZD2	0.385787	0.588832	0.0253807	0.655172	0.0431034	0.0657895	0.628099	1.4321	0.0260417	0.385787	0.588832	0.0253807	0.655172	0.0431034	0.0657895	0.628099	1.4321	0.0260417
G2E3	0.144928	0.731884	0.123188	0.19802	0.168317	0.85	0.169492	2.72973	0.140496	0.138889	0.701389	0.159722	0.19802	0.227723	1.15	0.16129	2.34884	0.190083
G3BP2	0.125	0.830357	0.0446429	0.150538	0.0537634	0.357143	0.142857	4.89474	0.046729	0.125	0.830357	0.0446429	0.150538	0.0537634	0.357143	0.142857	4.89474	0.046729
G6PD_ENST00000393562	0.357664	0.635036	0.00729927	0.563218	0.0114943	0.0204082	0.556818	1.74	0.00735294	0.355072	0.630435	0.0144928	0.563218	0.0229885	0.0408163	0.550562	1.70588	0.0147059
GAA	0.386266	0.596567	0.0171674	0.647482	0.028777	0.0444444	0.629371	1.47872	0.0174672	0.381356	0.588983	0.029661	0.647482	0.0503597	0.0777778	0.616438	1.43299	0.0305677
GABRD	0.380645	0.619355	0	0.614583	0	0	0.614583	1.62712	0	0.380645	0.619355	0	0.614583	0	0	0.614583	1.62712	0
GALNTL5	0.129771	0.824427	0.0458015	0.157407	0.0555556	0.352941	0.149123	4.69565	0.048	0.128788	0.818182	0.0530303	0.157407	0.0648148	0.411765	0.147826	4.5	0.056
GAS6_ENST00000355761	0.347518	0.624113	0.0283688	0.556818	0.0454545	0.0816327	0.532609	1.66038	0.0291971	0.318182	0.571429	0.11039	0.556818	0.193182	0.346939	0.466667	1.33333	0.124088
GATA1_ENST00000376665	0.122951	0.860656	0.0163934	0.142857	0.0190476	0.133333	0.140187	6.17647	0.0166667	0.122951	0.860656	0.0163934	0.142857	0.0190476	0.133333	0.140187	6.17647	0.0166667
GATA2	0.10231	0.864686	0.0330033	0.118321	0.0381679	0.322581	0.113971	6.39024	0.0341297	0.101307	0.856209	0.0424837	0.118321	0.0496183	0.419355	0.112727	5.95455	0.0443686
GCFC1	0.184211	0.694737	0.121053	0.265152	0.174242	0.657143	0.225806	2.27586	0.137725	0.183246	0.691099	0.125654	0.265152	0.181818	0.685714	0.224359	2.23729	0.143713
GCK_ENST00000395796	0.372222	0.611111	0.0166667	0.609091	0.0272727	0.0447761	0.59292	1.57143	0.0169492	0.372222	0.611111	0.0166667	0.609091	0.0272727	0.0447761	0.59292	1.57143	0.0169492
GDF6	0.356021	0.638743	0.0052356	0.557377	0.00819672	0.0147059	0.552846	1.76812	0.00526316	0.356021	0.638743	0.0052356	0.557377	0.00819672	0.0147059	0.552846	1.76812	0.00526316
GFPT2	0.397849	0.586022	0.016129	0.678899	0.0275229	0.0405405	0.660714	1.41558	0.0163934	0.395722	0.582888	0.0213904	0.678899	0.0366972	0.0540541	0.654867	1.39744	0.0218579
GGN	0.361446	0.63253	0.0060241	0.571429	0.00952381	0.0166667	0.566038	1.72131	0.00606061	0.352941	0.617647	0.0294118	0.571429	0.047619	0.0833333	0.545455	1.61538	0.030303
GHSR_ENST00000427970	0.356589	0.620155	0.0232558	0.575	0.0375	0.0652174	0.554217	1.63265	0.0238095	0.356589	0.620155	0.0232558	0.575	0.0375	0.0652174	0.554217	1.63265	0.0238095
GIGYF2	0.159091	0.662338	0.178571	0.240196	0.269608	1.12245	0.189189	1.96154	0.217391	0.158065	0.658065	0.183871	0.240196	0.279412	1.16327	0.187739	1.92453	0.225296
GIGYF2_ENST00000409451	0.159722	0.673611	0.166667	0.237113	0.247423	1.04348	0.190083	2.06383	0.2	0.158621	0.668966	0.172414	0.237113	0.257732	1.08696	0.188525	2.02083	0.208333
GIGYF2_ENST00000452341	0.173913	0.614907	0.21118	0.282828	0.343434	1.21429	0.210526	1.59677	0.267717	0.173913	0.614907	0.21118	0.282828	0.343434	1.21429	0.210526	1.59677	0.267717
GJA3	0.408333	0.533333	0.0583333	0.765625	0.109375	0.142857	0.690141	1.14286	0.0619469	0.408333	0.533333	0.0583333	0.765625	0.109375	0.142857	0.690141	1.14286	0.0619469
GJA8	0.388278	0.589744	0.021978	0.658385	0.0372671	0.0566038	0.634731	1.4375	0.0224719	0.388278	0.589744	0.021978	0.658385	0.0372671	0.0566038	0.634731	1.4375	0.0224719
GJB4	0.405405	0.585586	0.00900901	0.692308	0.0153846	0.0222222	0.681818	1.41304	0.00909091	0.405405	0.585586	0.00900901	0.692308	0.0153846	0.0222222	0.681818	1.41304	0.00909091
GLT6D1	0.355556	0.607407	0.037037	0.585366	0.0609756	0.104167	0.551724	1.54717	0.0384615	0.352941	0.602941	0.0441176	0.585366	0.0731707	0.125	0.545455	1.51852	0.0461538
GLTSCR1	0.2443	0.700326	0.0553746	0.348837	0.0790698	0.226667	0.323276	2.33696	0.0586207	0.221239	0.634218	0.144543	0.348837	0.227907	0.653333	0.284091	1.73387	0.168966
GNA11	0.135417	0.850694	0.0138889	0.159184	0.0163265	0.102564	0.156627	5.69767	0.0140845	0.134021	0.841924	0.024055	0.159184	0.0285714	0.179487	0.154762	5.32609	0.0246479
GNAQ	0.125424	0.823729	0.0508475	0.152263	0.0617284	0.405405	0.143411	4.67308	0.0535714	0.125424	0.823729	0.0508475	0.152263	0.0617284	0.405405	0.143411	4.67308	0.0535714
GNAS	0.0345304	0.94337	0.0220994	0.0366032	0.0234261	0.64	0.0357654	16.6585	0.0225989	0.0345304	0.94337	0.0220994	0.0366032	0.0234261	0.64	0.0357654	16.6585	0.0225989
GNAS_ENST00000371100	0.132075	0.843666	0.0242588	0.15655	0.028754	0.183673	0.152174	5.39655	0.0248619	0.132075	0.843666	0.0242588	0.15655	0.028754	0.183673	0.152174	5.39655	0.0248619
GNE	0.139706	0.838235	0.0220588	0.166667	0.0263158	0.157895	0.162393	5.18182	0.0225564	0.137681	0.826087	0.0362319	0.166667	0.0438596	0.263158	0.159664	4.75	0.037594
GNE_ENST00000396594	0.141791	0.835821	0.0223881	0.169643	0.0267857	0.157895	0.165217	5.09091	0.0229008	0.140741	0.82963	0.0296296	0.169643	0.0357143	0.210526	0.163793	4.86957	0.0305344
GNPTAB	0.212963	0.662037	0.125	0.321678	0.188811	0.586957	0.270588	1.9589	0.142857	0.211009	0.655963	0.133028	0.321678	0.202797	0.630435	0.267442	1.90667	0.153439
GOLGA5_ENST00000163416	0.126667	0.76	0.113333	0.166667	0.149123	0.894737	0.145038	3.16667	0.12782	0.126667	0.76	0.113333	0.166667	0.149123	0.894737	0.145038	3.16667	0.12782
GP1BA	0.369565	0.594203	0.0362319	0.621951	0.0609756	0.0980392	0.586207	1.46429	0.037594	0.359155	0.577465	0.0633803	0.621951	0.109756	0.176471	0.56044	1.36667	0.0676692
GP5	0.434783	0.538043	0.0271739	0.808081	0.0505051	0.0625	0.769231	1.16471	0.027933	0.432432	0.535135	0.0324324	0.808081	0.0606061	0.075	0.761905	1.15116	0.0335196
GP5_ENST00000323007	0.426316	0.547368	0.0263158	0.778846	0.0480769	0.0617284	0.743119	1.2093	0.027027	0.424084	0.544503	0.0314136	0.778846	0.0576923	0.0740741	0.736364	1.1954	0.0324324
GPR108	0.388889	0.563492	0.047619	0.690141	0.084507	0.122449	0.636364	1.29091	0.05	0.388889	0.563492	0.047619	0.690141	0.084507	0.122449	0.636364	1.29091	0.05
GPR152	0.348485	0.55303	0.0984848	0.630137	0.178082	0.282609	0.534884	1.23729	0.109244	0.348485	0.55303	0.0984848	0.630137	0.178082	0.282609	0.534884	1.23729	0.109244
GPR26	0.381944	0.604167	0.0138889	0.632184	0.0229885	0.0363636	0.617978	1.52632	0.0140845	0.371622	0.587838	0.0405405	0.632184	0.0689655	0.109091	0.591398	1.42623	0.0422535
GPR31	0.42	0.58	0	0.724138	0	0	0.724138	1.38095	0	0.42	0.58	0	0.724138	0	0	0.724138	1.38095	0
GPR77	0.385246	0.598361	0.0163934	0.643836	0.0273973	0.0425532	0.626667	1.4898	0.0166667	0.385246	0.598361	0.0163934	0.643836	0.0273973	0.0425532	0.626667	1.4898	0.0166667
GPR97	0.363057	0.611465	0.0254777	0.59375	0.0416667	0.0701754	0.57	1.57377	0.0261438	0.363057	0.611465	0.0254777	0.59375	0.0416667	0.0701754	0.57	1.57377	0.0261438
GPSM2	0.113043	0.808696	0.0782609	0.139785	0.0967742	0.692308	0.127451	4.22727	0.0849057	0.112069	0.801724	0.0862069	0.139785	0.107527	0.769231	0.126214	4.04348	0.0943396
GRB14	0.213333	0.733333	0.0533333	0.290909	0.0727273	0.25	0.271186	2.75	0.056338	0.190476	0.654762	0.154762	0.290909	0.236364	0.8125	0.235294	1.89655	0.183099
GRK4_ENST00000398052	0.237288	0.70339	0.059322	0.337349	0.0843373	0.25	0.311111	2.37143	0.0630631	0.210526	0.62406	0.165414	0.337349	0.26506	0.785714	0.266667	1.66	0.198198
GRLF1	0.175202	0.679245	0.145553	0.257937	0.214286	0.830769	0.212418	2.11765	0.170347	0.173797	0.673797	0.152406	0.257937	0.22619	0.876923	0.210356	2.06557	0.179811
GRLF1_ENST00000317082	0.17602	0.67602	0.147959	0.260377	0.218868	0.84058	0.213622	2.08661	0.173653	0.174242	0.669192	0.156566	0.260377	0.233962	0.898551	0.211009	2.0229	0.185629
GRM6	0.376847	0.583744	0.0394089	0.64557	0.0675105	0.104575	0.604743	1.40237	0.0410256	0.375	0.580882	0.0441176	0.64557	0.0759494	0.117647	0.6	1.38596	0.0461538
GRPR	0.405594	0.58042	0.013986	0.698795	0.0240964	0.0344828	0.682353	1.38333	0.0141844	0.405594	0.58042	0.013986	0.698795	0.0240964	0.0344828	0.682353	1.38333	0.0141844
GSDMB	0.359223	0.563107	0.0776699	0.637931	0.137931	0.216216	0.560606	1.28889	0.0842105	0.359223	0.563107	0.0776699	0.637931	0.137931	0.216216	0.560606	1.28889	0.0842105
GSDMB_ENST00000418519	0.35514	0.570093	0.0747664	0.622951	0.131148	0.210526	0.550725	1.32609	0.0808081	0.35514	0.570093	0.0747664	0.622951	0.131148	0.210526	0.550725	1.32609	0.0808081
GSK3B_ENST00000316626	0.100629	0.767296	0.132075	0.131148	0.172131	1.3125	0.111888	3.2973	0.152174	0.100629	0.767296	0.132075	0.131148	0.172131	1.3125	0.111888	3.2973	0.152174
GTF2E1	0.144144	0.828829	0.027027	0.173913	0.0326087	0.1875	0.168421	4.84211	0.0277778	0.144144	0.828829	0.027027	0.173913	0.0326087	0.1875	0.168421	4.84211	0.0277778
GTPBP5	0.40367	0.568807	0.0275229	0.709677	0.0483871	0.0681818	0.676923	1.31915	0.0283019	0.40367	0.568807	0.0275229	0.709677	0.0483871	0.0681818	0.676923	1.31915	0.0283019
GUF1	0.252033	0.658537	0.0894309	0.382716	0.135802	0.354839	0.336957	1.92857	0.0982143	0.226277	0.591241	0.182482	0.382716	0.308642	0.806452	0.292453	1.44643	0.223214
H3F3A	0.0264151	0.969811	0.00377358	0.0272374	0.00389105	0.142857	0.0271318	32.125	0.00378788	0.0264151	0.969811	0.00377358	0.0272374	0.00389105	0.142857	0.0271318	32.125	0.00378788
HAPLN3	0.355769	0.644231	0	0.552239	0	0	0.552239	1.81081	0	0.355769	0.644231	0	0.552239	0	0	0.552239	1.81081	0
HAPLN4	0.416667	0.555556	0.0277778	0.75	0.05	0.0666667	0.714286	1.25	0.0285714	0.408163	0.544218	0.047619	0.75	0.0875	0.116667	0.689655	1.19403	0.05
HCRTR1	0.387931	0.577586	0.0344828	0.671642	0.0597015	0.0888889	0.633803	1.36735	0.0357143	0.387931	0.577586	0.0344828	0.671642	0.0597015	0.0888889	0.633803	1.36735	0.0357143
HDX	0.132597	0.823204	0.0441989	0.161074	0.0536913	0.333333	0.152866	4.65625	0.0462428	0.131148	0.814208	0.0546448	0.161074	0.0671141	0.416667	0.150943	4.38235	0.0578035
HELLS	0.2	0.703226	0.0967742	0.284404	0.137615	0.483871	0.25	2.36957	0.107143	0.187879	0.660606	0.151515	0.284404	0.229358	0.806452	0.231343	1.94643	0.178571
HGF	0.118729	0.795987	0.0852843	0.14916	0.107143	0.71831	0.134725	3.90164	0.0932358	0.118729	0.795987	0.0852843	0.14916	0.107143	0.71831	0.134725	3.90164	0.0932358
HIAT1										0.1875	0.625	0.1875	0.3	0.3	1	0.230769	1.66667	0.230769
HIC1	0.36	0.64	0	0.5625	0	0	0.5625	1.77778	0	0.36	0.64	0	0.5625	0	0	0.5625	1.77778	0
HIC1_ENST00000322941	0.365079	0.634921	0	0.575	0	0	0.575	1.73913	0	0.365079	0.634921	0	0.575	0	0	0.575	1.73913	0
HIST1H3B	0.115385	0.863248	0.0213675	0.133663	0.0247525	0.185185	0.130435	6.3125	0.0218341	0.114894	0.859574	0.0255319	0.133663	0.029703	0.222222	0.129808	6.12121	0.0262009
HKR1_ENST00000392153	0.336283	0.584071	0.079646	0.575758	0.136364	0.236842	0.506667	1.40426	0.0865385	0.336283	0.584071	0.079646	0.575758	0.136364	0.236842	0.506667	1.40426	0.0865385
HLA-A	0.122807	0.608187	0.269006	0.201923	0.442308	2.19048	0.14	1.55224	0.368	0.112903	0.55914	0.327957	0.201923	0.586538	2.90476	0.127273	1.26829	0.488
HLA-A_ENST00000376806	0.0896552	0.634483	0.275862	0.141304	0.434783	3.07692	0.0984848	1.73585	0.380952	0.0890411	0.630137	0.280822	0.141304	0.445652	3.15385	0.0977444	1.7037	0.390476
HLA-B	0.125654	0.706806	0.167539	0.177778	0.237037	1.33333	0.143713	2.41071	0.201258	0.117647	0.661765	0.220588	0.177778	0.333333	1.875	0.133333	1.95652	0.283019
HMGXB4										0.190476	0.666667	0.142857	0.285714	0.214286	0.75	0.235294	2	0.166667
HMMR	0.19403	0.708955	0.0970149	0.273684	0.136842	0.5	0.240741	2.4359	0.107438	0.174497	0.637584	0.187919	0.273684	0.294737	1.07692	0.211382	1.75926	0.231405
HNF1A	0.13602	0.79597	0.0680101	0.170886	0.085443	0.5	0.157434	3.90123	0.072973	0.117391	0.686957	0.195652	0.170886	0.28481	1.66667	0.133005	2.19444	0.243243
HNF1A_ENST00000543427	0.10929	0.852459	0.0382514	0.128205	0.0448718	0.35	0.122699	5.77778	0.0397727	0.10582	0.825397	0.0687831	0.128205	0.0833333	0.65	0.118343	4.72727	0.0738636
HNRNPA2B1	0.0990991	0.828829	0.0720721	0.119565	0.0869565	0.727273	0.11	4.84211	0.0776699	0.0964912	0.807018	0.0964912	0.119565	0.119565	1	0.106796	4.18182	0.106796
HNRNPA2B1_ENST00000354667	0.0990991	0.828829	0.0720721	0.119565	0.0869565	0.727273	0.11	4.84211	0.0776699	0.0964912	0.807018	0.0964912	0.119565	0.119565	1	0.106796	4.18182	0.106796
HNRNPK	0.125	0.841667	0.0333333	0.148515	0.039604	0.266667	0.142857	5.31579	0.0344828	0.125	0.841667	0.0333333	0.148515	0.039604	0.266667	0.142857	5.31579	0.0344828
HNRNPL	0.248062	0.697674	0.0542636	0.355556	0.0777778	0.21875	0.329897	2.30769	0.057377	0.210526	0.592105	0.197368	0.355556	0.333333	0.9375	0.266667	1.45161	0.245902
HNRNPR	0.395522	0.589552	0.0149254	0.670886	0.0253165	0.0377358	0.654321	1.43636	0.0151515	0.395522	0.589552	0.0149254	0.670886	0.0253165	0.0377358	0.654321	1.43636	0.0151515
HNRPL	0.230088	0.707965	0.0619469	0.325	0.0875	0.269231	0.298851	2.42424	0.0660377	0.191176	0.588235	0.220588	0.325	0.375	1.15385	0.236364	1.42857	0.283019
HNRPR	0.395522	0.589552	0.0149254	0.670886	0.0253165	0.0377358	0.654321	1.43636	0.0151515	0.395522	0.589552	0.0149254	0.670886	0.0253165	0.0377358	0.654321	1.43636	0.0151515
HOMEZ	0.144231	0.817308	0.0384615	0.176471	0.0470588	0.266667	0.168539	4.47368	0.04	0.144231	0.817308	0.0384615	0.176471	0.0470588	0.266667	0.168539	4.47368	0.04
HOMEZ_ENST00000357460	0.141509	0.820755	0.0377358	0.172414	0.045977	0.266667	0.164835	4.57895	0.0392157	0.132743	0.769912	0.0973451	0.172414	0.126437	0.733333	0.153061	3.34615	0.107843
HOXA11	0.4	0.52381	0.0761905	0.763636	0.145455	0.190476	0.666667	1.1	0.0824742	0.385321	0.504587	0.110092	0.763636	0.218182	0.285714	0.626866	1.01852	0.123711
HOXB3	0.384615	0.589744	0.025641	0.652174	0.0434783	0.0666667	0.625	1.4375	0.0263158	0.352941	0.541176	0.105882	0.652174	0.195652	0.3	0.545455	1.17949	0.118421
HOXD10	0.531792	0.445087	0.0231214	1.19481	0.0519481	0.0434783	1.1358	0.802083	0.0236686	0.531792	0.445087	0.0231214	1.19481	0.0519481	0.0434783	1.1358	0.802083	0.0236686
HOXD12	0.343137	0.607843	0.0490196	0.564516	0.0806452	0.142857	0.522388	1.55	0.0515464	0.330189	0.584906	0.0849057	0.564516	0.145161	0.257143	0.492958	1.40909	0.0927835
HOXD3	0.398693	0.575163	0.0261438	0.693182	0.0454545	0.0655738	0.663043	1.35385	0.0268456	0.393548	0.567742	0.0387097	0.693182	0.0681818	0.0983607	0.648936	1.31343	0.0402685
HPS6	0.252427	0.679612	0.0679612	0.371429	0.1	0.269231	0.337662	2.12121	0.0729167	0.226087	0.608696	0.165217	0.371429	0.271429	0.730769	0.292135	1.55556	0.197917
HRAS	0.0149254	0.979647	0.00542741	0.0152355	0.00554017	0.363636	0.0151515	48.1333	0.00545703	0.0149051	0.97832	0.00677507	0.0152355	0.00692521	0.454545	0.0151307	45.125	0.00682128
HRAS_ENST00000397594	0.0243902	0.96206	0.0135501	0.0253521	0.0140845	0.555556	0.025	25.3571	0.0137363	0.0243243	0.959459	0.0162162	0.0253521	0.0169014	0.666667	0.0249307	23.6667	0.0164835
HS3ST3A1	0.380531	0.610619	0.00884956	0.623188	0.0144928	0.0232558	0.614286	1.56818	0.00892857	0.380531	0.610619	0.00884956	0.623188	0.0144928	0.0232558	0.614286	1.56818	0.00892857
HSD3B1	0.36	0.584	0.056	0.616438	0.0958904	0.155556	0.5625	1.40385	0.059322	0.36	0.584	0.056	0.616438	0.0958904	0.155556	0.5625	1.40385	0.059322
HSPA2	0.387435	0.60733	0.0052356	0.637931	0.00862069	0.0135135	0.632479	1.54667	0.00526316	0.375635	0.588832	0.035533	0.637931	0.0603448	0.0945946	0.601626	1.4321	0.0368421
HTR1F	0.227273	0.690909	0.0818182	0.328947	0.118421	0.36	0.294118	2.23529	0.0891089	0.211864	0.644068	0.144068	0.328947	0.223684	0.68	0.268817	1.80952	0.168317
ICA1	0.225806	0.670968	0.103226	0.336538	0.153846	0.457143	0.291667	2.03922	0.115108	0.213415	0.634146	0.152439	0.336538	0.240385	0.714286	0.271318	1.73333	0.179856
IDH1	0.00732218	0.989017	0.00366109	0.00740349	0.00370175	0.5	0.00737619	90.0476	0.00367454	0.00729927	0.985923	0.00677789	0.00740349	0.00687467	0.928571	0.00735294	70.037	0.00682415
IDH2	0.0420792	0.935644	0.0222772	0.0449735	0.0238095	0.529412	0.0439276	14.5385	0.0227848	0.0414634	0.921951	0.0365854	0.0449735	0.0396825	0.882353	0.043257	11.8125	0.0379747
IDH3B	0.135922	0.84466	0.0194175	0.16092	0.0229885	0.142857	0.157303	5.4375	0.019802	0.135922	0.84466	0.0194175	0.16092	0.0229885	0.142857	0.157303	5.4375	0.019802
IFT57	0.192308	0.644231	0.163462	0.298507	0.253731	0.85	0.238095	1.81081	0.195402	0.190476	0.638095	0.171429	0.298507	0.268657	0.9	0.235294	1.76316	0.206897
IGF1_ENST00000307046	0.122951	0.844262	0.0327869	0.145631	0.038835	0.266667	0.140187	5.42105	0.0338983	0.122951	0.844262	0.0327869	0.145631	0.038835	0.266667	0.140187	5.42105	0.0338983
IGF2BP2_ENST00000421047	0.356589	0.620155	0.0232558	0.575	0.0375	0.0652174	0.554217	1.63265	0.0238095	0.356589	0.620155	0.0232558	0.575	0.0375	0.0652174	0.554217	1.63265	0.0238095
IGSF21	0.386364	0.590909	0.0227273	0.653846	0.0384615	0.0588235	0.62963	1.44444	0.0232558	0.384615	0.588235	0.0271493	0.653846	0.0461538	0.0705882	0.625	1.42857	0.027907
IL12RB1	0.369369	0.54955	0.0810811	0.672131	0.147541	0.219512	0.585714	1.22	0.0882353	0.366071	0.544643	0.0892857	0.672131	0.163934	0.243902	0.577465	1.19608	0.0980392
IL12RB1_ENST00000430026	0.360406	0.57868	0.0609137	0.622807	0.105263	0.169014	0.563492	1.37349	0.0648649	0.358586	0.575758	0.0656566	0.622807	0.114035	0.183099	0.559055	1.35714	0.0702703
IL12RB1_ENST00000593993	0.361257	0.570681	0.0680628	0.633028	0.119266	0.188406	0.565574	1.32927	0.0730337	0.361257	0.570681	0.0680628	0.633028	0.119266	0.188406	0.565574	1.32927	0.0730337
IL1RAP_ENST00000443369	0.212766	0.673759	0.113475	0.315789	0.168421	0.533333	0.27027	2.06522	0.128	0.211268	0.669014	0.119718	0.315789	0.178947	0.566667	0.267857	2.02128	0.136
IL1RAPL1	0.222642	0.660377	0.116981	0.337143	0.177143	0.525424	0.286408	1.94444	0.132479	0.221805	0.657895	0.120301	0.337143	0.182857	0.542373	0.285024	1.92308	0.136752
IL1RAPL1_ENST00000378993	0.221374	0.664122	0.114504	0.333333	0.172414	0.517241	0.284314	1.97727	0.12931	0.220532	0.661597	0.117871	0.333333	0.178161	0.534483	0.282927	1.95506	0.133621
IL2RG										0.238532	0.614679	0.146789	0.38806	0.238806	0.615385	0.313253	1.59524	0.172043
IL2RG_ENST00000374202										0.238532	0.614679	0.146789	0.38806	0.238806	0.615385	0.313253	1.59524	0.172043
IMP5	0.384146	0.609756	0.00609756	0.63	0.01	0.015873	0.623762	1.5625	0.00613497	0.384146	0.609756	0.00609756	0.63	0.01	0.015873	0.623762	1.5625	0.00613497
ING1	0.206349	0.626984	0.166667	0.329114	0.265823	0.807692	0.26	1.68085	0.2	0.206349	0.626984	0.166667	0.329114	0.265823	0.807692	0.26	1.68085	0.2
ING1_ENST00000338450	0.2	0.617391	0.182609	0.323944	0.295775	0.913043	0.25	1.61364	0.223404	0.2	0.617391	0.182609	0.323944	0.295775	0.913043	0.25	1.61364	0.223404
ING1_ENST00000375774	0.188312	0.681818	0.12987	0.27619	0.190476	0.689655	0.232	2.14286	0.149254	0.188312	0.681818	0.12987	0.27619	0.190476	0.689655	0.232	2.14286	0.149254
IRF2BPL	0.37415	0.62585	0	0.597826	0	0	0.597826	1.67273	0	0.366667	0.613333	0.02	0.597826	0.0326087	0.0545455	0.578947	1.58621	0.0204082
IRF3	0.407407	0.564815	0.0277778	0.721311	0.0491803	0.0681818	0.6875	1.29787	0.0285714	0.4	0.554545	0.0454545	0.721311	0.0819672	0.113636	0.666667	1.2449	0.047619
IRF4_ENST00000380956	0.130303	0.815152	0.0545455	0.159851	0.0669145	0.418605	0.149826	4.40984	0.0576923	0.130303	0.815152	0.0545455	0.159851	0.0669145	0.418605	0.149826	4.40984	0.0576923
IRGQ	0.373016	0.571429	0.0555556	0.652778	0.0972222	0.148936	0.594937	1.33333	0.0588235	0.373016	0.571429	0.0555556	0.652778	0.0972222	0.148936	0.594937	1.33333	0.0588235
IRS2	0.138015	0.854722	0.00726392	0.161473	0.00849858	0.0526316	0.160112	5.88333	0.00731707	0.137681	0.852657	0.00966184	0.161473	0.0113314	0.0701754	0.159664	5.78689	0.0097561
ITFG3_ENST00000450082	0.361538	0.607692	0.0307692	0.594937	0.0506329	0.0851064	0.566265	1.54902	0.031746	0.361538	0.607692	0.0307692	0.594937	0.0506329	0.0851064	0.566265	1.54902	0.031746
ITGA11	0.401294	0.576052	0.0226537	0.696629	0.0393258	0.0564516	0.67027	1.35878	0.0231788	0.394904	0.566879	0.0382166	0.696629	0.0674157	0.0967742	0.652632	1.30882	0.0397351
ITGBL1	0.128866	0.845361	0.0257732	0.152439	0.0304878	0.2	0.147929	5.46667	0.026455	0.128866	0.845361	0.0257732	0.152439	0.0304878	0.2	0.147929	5.46667	0.026455
ITPRIP	0.38255	0.610738	0.00671141	0.626374	0.010989	0.0175439	0.619565	1.56897	0.00675676	0.377483	0.602649	0.0198675	0.626374	0.032967	0.0526316	0.606383	1.51667	0.0202703
IWS1	0.167665	0.694611	0.137725	0.241379	0.198276	0.821429	0.201439	2.27451	0.159722	0.152174	0.630435	0.217391	0.241379	0.344828	1.42857	0.179487	1.70588	0.277778
JAK1	0.10325	0.81262	0.08413	0.127059	0.103529	0.814815	0.115139	4.33673	0.091858	0.09375	0.737847	0.168403	0.127059	0.228235	1.7963	0.103448	2.81457	0.202505
JAK2	0.0291314	0.947564	0.0233051	0.0307434	0.0245947	0.8	0.0300055	18.0707	0.0238612	0.0290851	0.94606	0.0248546	0.0307434	0.0262717	0.854545	0.0299564	17.5392	0.0254881
JAK3_ENST00000534444	0.0658436	0.868313	0.0658436	0.0758294	0.0758294	1	0.0704846	6.59375	0.0704846	0.0658436	0.868313	0.0658436	0.0758294	0.0758294	1	0.0704846	6.59375	0.0704846
JPH4	0.290123	0.666667	0.0432099	0.435185	0.0648148	0.148936	0.408696	2	0.0451613	0.256831	0.590164	0.153005	0.435185	0.259259	0.595745	0.345588	1.44	0.180645
KAT8	0.168067	0.815126	0.0168067	0.206186	0.0206186	0.1	0.20202	4.40909	0.017094	0.168067	0.815126	0.0168067	0.206186	0.0206186	0.1	0.20202	4.40909	0.017094
KBTBD4	0.192661	0.743119	0.0642202	0.259259	0.0864198	0.333333	0.238636	2.89286	0.0686275	0.173554	0.669421	0.157025	0.259259	0.234568	0.904762	0.21	2.025	0.186275
KCNC1	0.412037	0.578704	0.00925926	0.712	0.016	0.0224719	0.700787	1.37363	0.00934579	0.408257	0.573394	0.0183486	0.712	0.032	0.0449438	0.689922	1.34409	0.0186916
KCNC1_ENST00000265969	0.408889	0.591111	0	0.691729	0	0	0.691729	1.44565	0	0.405286	0.585903	0.00881057	0.691729	0.0150376	0.0217391	0.681481	1.41489	0.00888889
KCNG1_ENST00000396017	0.387755	0.585034	0.0272109	0.662791	0.0465116	0.0701754	0.633333	1.40984	0.027972	0.387755	0.585034	0.0272109	0.662791	0.0465116	0.0701754	0.633333	1.40984	0.027972
KCNG4	0.398104	0.554502	0.0473934	0.717949	0.0854701	0.119048	0.661417	1.24468	0.0497512	0.398104	0.554502	0.0473934	0.717949	0.0854701	0.119048	0.661417	1.24468	0.0497512
KCNJ11	0.390909	0.590909	0.0181818	0.661538	0.0307692	0.0465116	0.641791	1.44444	0.0185185	0.387387	0.585586	0.027027	0.661538	0.0461538	0.0697674	0.632353	1.41304	0.0277778
KCNJ5	0.0720461	0.919308	0.00864553	0.0783699	0.00940439	0.12	0.0776398	11.3929	0.00872093	0.0719424	0.917986	0.0100719	0.0783699	0.0109718	0.14	0.0775194	11.193	0.0101744
KCNK1	0.340741	0.577778	0.0814815	0.589744	0.141026	0.23913	0.516854	1.36842	0.0887097	0.340741	0.577778	0.0814815	0.589744	0.141026	0.23913	0.516854	1.36842	0.0887097
KCNK3	0.384615	0.589744	0.025641	0.652174	0.0434783	0.0666667	0.625	1.4375	0.0263158	0.384615	0.589744	0.025641	0.652174	0.0434783	0.0666667	0.625	1.4375	0.0263158
KCNN2	0.372807	0.578947	0.0482456	0.643939	0.0833333	0.129412	0.594406	1.375	0.0506912	0.372807	0.578947	0.0482456	0.643939	0.0833333	0.129412	0.594406	1.375	0.0506912
KCNN2_ENST00000512097	0.409091	0.539773	0.0511364	0.757895	0.0947368	0.125	0.692308	1.17284	0.0538922	0.409091	0.539773	0.0511364	0.757895	0.0947368	0.125	0.692308	1.17284	0.0538922
KCNN4	0.378378	0.585586	0.036036	0.646154	0.0615385	0.0952381	0.608696	1.41304	0.0373832	0.378378	0.585586	0.036036	0.646154	0.0615385	0.0952381	0.608696	1.41304	0.0373832
KCNQ1	0.368098	0.601227	0.0306748	0.612245	0.0510204	0.0833333	0.582524	1.50769	0.0316456	0.346821	0.566474	0.0867052	0.612245	0.153061	0.25	0.530973	1.30667	0.0949367
KCNQ1_ENST00000335475	0.384058	0.57971	0.0362319	0.6625	0.0625	0.0943396	0.623529	1.37931	0.037594	0.365517	0.551724	0.0827586	0.6625	0.15	0.226415	0.576087	1.23077	0.0902256
KCTD3	0.160221	0.723757	0.116022	0.221374	0.160305	0.724138	0.190789	2.62	0.13125	0.147959	0.668367	0.183673	0.221374	0.274809	1.24138	0.173653	2.01538	0.225
KDM5A	0.101664	0.824399	0.0739372	0.123318	0.0896861	0.727273	0.113169	4.69474	0.0798403	0.0971731	0.787986	0.114841	0.123318	0.14574	1.18182	0.107632	3.71667	0.129741
KDM5A_ENST00000399788	0.101664	0.824399	0.0739372	0.123318	0.0896861	0.727273	0.113169	4.69474	0.0798403	0.0971731	0.787986	0.114841	0.123318	0.14574	1.18182	0.107632	3.71667	0.129741
KDM5C	0.121053	0.75614	0.122807	0.160093	0.162413	1.01449	0.137725	3.10072	0.14	0.116751	0.729272	0.153976	0.160093	0.211137	1.31884	0.132184	2.69375	0.182
KDM5C_ENST00000452825	0.122845	0.758621	0.118534	0.161932	0.15625	0.964912	0.140049	3.14286	0.134474	0.118998	0.734864	0.146138	0.161932	0.198864	1.22807	0.135071	2.77165	0.171149
KDM6A	0.127714	0.586207	0.286079	0.217865	0.488017	2.24	0.146413	1.41667	0.400716	0.125313	0.575188	0.299499	0.217865	0.520697	2.39	0.143266	1.35398	0.427549
KDM6A_ENST00000377967	0.148359	0.592011	0.259629	0.250602	0.438554	1.75	0.174204	1.45105	0.350674	0.148148	0.591168	0.260684	0.250602	0.440964	1.75962	0.173913	1.44599	0.352601
KDM6A_ENST00000382899	0.151297	0.587896	0.260807	0.257353	0.443627	1.72381	0.178268	1.42657	0.352827	0.151079	0.58705	0.261871	0.257353	0.446078	1.73333	0.177966	1.4216	0.354776
KEAP1	0.0797546	0.842025	0.0782209	0.0947177	0.0928962	0.980769	0.0866667	5.3301	0.0848586	0.0790274	0.834347	0.0866261	0.0947177	0.103825	1.09615	0.0858086	5.0367	0.0948419
KIAA1267	0.202206	0.672794	0.125	0.300546	0.185792	0.618182	0.253456	2.05618	0.142857	0.19573	0.651246	0.153025	0.300546	0.234973	0.781818	0.243363	1.86735	0.180672
KIAA1586	0.221239	0.681416	0.0973451	0.324675	0.142857	0.44	0.284091	2.13889	0.107843	0.210084	0.647059	0.142857	0.324675	0.220779	0.68	0.265957	1.83333	0.166667
KIAA1731_ENST00000411936	0.110599	0.797235	0.0921659	0.138728	0.115607	0.833333	0.124352	3.93182	0.101523	0.110092	0.793578	0.0963303	0.138728	0.121387	0.875	0.123711	3.84444	0.106599
KIF25	0.337748	0.589404	0.0728477	0.573034	0.123596	0.215686	0.51	1.43548	0.0785714	0.337748	0.589404	0.0728477	0.573034	0.123596	0.215686	0.51	1.43548	0.0785714
KIR3DL1_ENST00000402254	0.360465	0.627907	0.0116279	0.574074	0.0185185	0.0322581	0.563636	1.6875	0.0117647	0.356322	0.62069	0.0229885	0.574074	0.037037	0.0645161	0.553571	1.63636	0.0235294
KIT	0.0980574	0.884366	0.0175763	0.110879	0.0198745	0.179245	0.108718	7.648	0.0178908	0.0976959	0.882028	0.0202765	0.110763	0.0229885	0.207547	0.108274	7.47656	0.0206961
KLF3										0.189189	0.63964	0.171171	0.295775	0.267606	0.904762	0.233333	1.775	0.206522
KLF4	0.133641	0.857143	0.00921659	0.155914	0.0107527	0.0689655	0.154255	6	0.00930233	0.133641	0.857143	0.00921659	0.155914	0.0107527	0.0689655	0.154255	6	0.00930233
KLHDC5	0.284483	0.663793	0.0517241	0.428571	0.0779221	0.181818	0.39759	1.97436	0.0545455	0.253846	0.592308	0.153846	0.428571	0.25974	0.606061	0.340206	1.45283	0.181818
KLHDC8A	0.376	0.584	0.04	0.643836	0.0684932	0.106383	0.602564	1.40385	0.0416667	0.376	0.584	0.04	0.643836	0.0684932	0.106383	0.602564	1.40385	0.0416667
KLHL14_ENST00000358095	0.384058	0.572464	0.0434783	0.670886	0.0759494	0.113208	0.623529	1.33898	0.0454545	0.365517	0.544828	0.0896552	0.670886	0.164557	0.245283	0.576087	1.19697	0.0984848
KLHL23	0.09	0.89	0.02	0.101124	0.0224719	0.222222	0.0989011	8.09091	0.0204082	0.09	0.89	0.02	0.101124	0.0224719	0.222222	0.0989011	8.09091	0.0204082
KLHL5	0.125	0.845238	0.0297619	0.147887	0.0352113	0.238095	0.142857	5.46154	0.0306748	0.121387	0.820809	0.0578035	0.147887	0.0704225	0.47619	0.138158	4.58065	0.0613497
KLHL5_ENST00000359687	0.118421	0.855263	0.0263158	0.138462	0.0307692	0.222222	0.134328	5.90909	0.027027	0.118421	0.855263	0.0263158	0.138462	0.0307692	0.222222	0.134328	5.90909	0.027027
KLHL5_ENST00000381930	0.121622	0.851351	0.027027	0.142857	0.031746	0.222222	0.138462	5.72727	0.0277778	0.121622	0.851351	0.027027	0.142857	0.031746	0.222222	0.138462	5.72727	0.0277778
KLHL7	0.125	0.825	0.05	0.151515	0.0606061	0.4	0.142857	4.71429	0.0526316	0.125	0.825	0.05	0.151515	0.0606061	0.4	0.142857	4.71429	0.0526316
KLK15	0.167832	0.825175	0.00699301	0.20339	0.00847458	0.0416667	0.201681	4.72	0.00704225	0.166667	0.819444	0.0138889	0.20339	0.0169492	0.0833333	0.2	4.53846	0.0140845
KLRAQ1	0.233333	0.633333	0.133333	0.368421	0.210526	0.571429	0.304348	1.72727	0.153846	0.233333	0.633333	0.133333	0.368421	0.210526	0.571429	0.304348	1.72727	0.153846
KMO	0.131944	0.840278	0.0277778	0.157025	0.0330579	0.210526	0.152	5.26087	0.0285714	0.130137	0.828767	0.0410959	0.157025	0.0495868	0.315789	0.149606	4.84	0.0428571
KMT2C	0.111469	0.690926	0.197605	0.161333	0.286	1.77273	0.125454	2.23547	0.246269	0.10852	0.672646	0.218834	0.161333	0.325333	2.01653	0.12173	2.05479	0.280138
KMT2D	0.112883	0.661759	0.225358	0.170581	0.340544	1.99638	0.127248	1.95647	0.290919	0.107855	0.632278	0.259867	0.170581	0.411001	2.40942	0.120894	1.71945	0.351109
KPNA5	0.132231	0.826446	0.0413223	0.16	0.05	0.3125	0.152381	4.7619	0.0431034	0.132231	0.826446	0.0413223	0.16	0.05	0.3125	0.152381	4.7619	0.0431034
KRAS	0.00384579	0.995498	0.000656599	0.00386319	0.000659568	0.170732	0.00386064	221.104	0.00065703	0.00384543	0.995404	0.000750328	0.00386319	0.000753793	0.195122	0.00386028	216.592	0.000750892
KRAS_ENST00000256078	0.00743494	0.991945	0.000619579	0.00749532	0.00062461	0.0833333	0.00749064	123.154	0.000619963	0.00743187	0.991536	0.0010322	0.00749532	0.00104102	0.138889	0.00748752	117.146	0.00103327
KRI1	0.345912	0.597484	0.0566038	0.578947	0.0947368	0.163636	0.528846	1.48438	0.06	0.34375	0.59375	0.0625	0.578947	0.105263	0.181818	0.52381	1.46154	0.0666667
KRT15	0.372222	0.605556	0.0222222	0.614679	0.0366972	0.0597015	0.59292	1.53521	0.0227273	0.36612	0.595628	0.0382514	0.614679	0.0642202	0.104478	0.577586	1.47297	0.0397727
KRT82	0.375	0.583333	0.0416667	0.642857	0.0714286	0.111111	0.6	1.4	0.0434783	0.375	0.583333	0.0416667	0.642857	0.0714286	0.111111	0.6	1.4	0.0434783
KRT85	0.378698	0.597633	0.0236686	0.633663	0.039604	0.0625	0.609524	1.48529	0.0242424	0.378698	0.597633	0.0236686	0.633663	0.039604	0.0625	0.609524	1.48529	0.0242424
KRTAP27-1	0.356436	0.60396	0.039604	0.590164	0.0655738	0.111111	0.553846	1.525	0.0412371	0.356436	0.60396	0.039604	0.590164	0.0655738	0.111111	0.553846	1.525	0.0412371
KRTAP5-4	0.429752	0.570248	0	0.753623	0	0	0.753623	1.32692	0	0.42623	0.565574	0.00819672	0.753623	0.0144928	0.0192308	0.742857	1.30189	0.00826446
LARGE_ENST00000452586	0.168224	0.831776	0	0.202247	0	0	0.202247	4.94444	0	0.168224	0.831776	0	0.202247	0	0	0.202247	4.94444	0
LARP4B	0.213115	0.68306	0.103825	0.312	0.152	0.487179	0.270833	2.15517	0.115854	0.169565	0.543478	0.286957	0.312	0.528	1.69231	0.204188	1.19048	0.402439
LARP7										0.163934	0.614754	0.221311	0.266667	0.36	1.35	0.196078	1.59574	0.284211
LATS1_ENST00000253339	0.0784314	0.775599	0.145969	0.101124	0.188202	1.86111	0.0851064	3.45631	0.170918	0.0775862	0.767241	0.155172	0.101124	0.202247	2	0.0841121	3.2963	0.183673
LATS1_ENST00000392273	0.0881226	0.750958	0.16092	0.117347	0.214286	1.82609	0.0966387	3.01538	0.191781	0.0877863	0.748092	0.164122	0.117347	0.219388	1.86957	0.0962343	2.9697	0.196347
LATS1_ENST00000543571	0.0803571	0.770089	0.149554	0.104348	0.194203	1.86111	0.0873786	3.34951	0.175853	0.0792952	0.759912	0.160793	0.104348	0.211594	2.02778	0.0861244	3.16514	0.191601
LCOR	0.442623	0.532787	0.0245902	0.830769	0.0461538	0.0555556	0.794118	1.14035	0.0252101	0.432	0.52	0.048	0.830769	0.0923077	0.111111	0.760563	1.08333	0.0504202
LGR6_ENST00000255432	0.365482	0.598985	0.035533	0.610169	0.059322	0.0972222	0.576	1.49367	0.0368421	0.36	0.59	0.05	0.610169	0.0847458	0.138889	0.5625	1.43902	0.0526316
LGR6_ENST00000439764	0.372549	0.581699	0.0457516	0.640449	0.0786517	0.122807	0.59375	1.39063	0.0479452	0.365385	0.570513	0.0641026	0.640449	0.11236	0.175439	0.575758	1.32836	0.0684932
LHFPL3	0.428571	0.526786	0.0446429	0.813559	0.0847458	0.104167	0.75	1.11321	0.046729	0.424779	0.522124	0.0530973	0.813559	0.101695	0.125	0.738462	1.09259	0.0560748
LHFPL3_ENST00000543266	0.419048	0.542857	0.0380952	0.77193	0.0701754	0.0909091	0.721311	1.1875	0.039604	0.419048	0.542857	0.0380952	0.77193	0.0701754	0.0909091	0.721311	1.1875	0.039604
LHFPL5	0.38835	0.592233	0.0194175	0.655738	0.0327869	0.05	0.634921	1.45238	0.019802	0.38835	0.592233	0.0194175	0.655738	0.0327869	0.05	0.634921	1.45238	0.019802
LIN54	0.36019	0.597156	0.042654	0.603175	0.0714286	0.118421	0.562963	1.48235	0.0445545	0.36019	0.597156	0.042654	0.603175	0.0714286	0.118421	0.562963	1.48235	0.0445545
LINC00273	0.437956	0.547445	0.0145985	0.8	0.0266667	0.0333333	0.779221	1.20968	0.0148148	0.437956	0.547445	0.0145985	0.8	0.0266667	0.0333333	0.779221	1.20968	0.0148148
LINC00273_ENST00000539813	0.437956	0.547445	0.0145985	0.8	0.0266667	0.0333333	0.779221	1.20968	0.0148148	0.437956	0.547445	0.0145985	0.8	0.0266667	0.0333333	0.779221	1.20968	0.0148148
LMAN1	0.178218	0.653465	0.168317	0.272727	0.257576	0.944444	0.216867	1.88571	0.202381	0.15	0.55	0.3	0.272727	0.545455	2	0.176471	1.22222	0.428571
LMX1B	0.385185	0.577778	0.037037	0.666667	0.0641026	0.0961538	0.626506	1.36842	0.0384615	0.385185	0.577778	0.037037	0.666667	0.0641026	0.0961538	0.626506	1.36842	0.0384615
LMX1B_ENST00000355497	0.382353	0.580882	0.0367647	0.658228	0.0632911	0.0961538	0.619048	1.38596	0.0381679	0.382353	0.580882	0.0367647	0.658228	0.0632911	0.0961538	0.619048	1.38596	0.0381679
LMX1B_ENST00000373474	0.375	0.59375	0.03125	0.631579	0.0526316	0.0833333	0.6	1.46154	0.0322581	0.375	0.59375	0.03125	0.631579	0.0526316	0.0833333	0.6	1.46154	0.0322581
LRRC14B	0.364407	0.601695	0.0338983	0.605634	0.056338	0.0930233	0.573333	1.51064	0.0350877	0.352459	0.581967	0.0655738	0.605634	0.112676	0.186047	0.544304	1.39216	0.0701754
LRRC33	0.369668	0.611374	0.0189573	0.604651	0.0310078	0.0512821	0.586466	1.57317	0.0193237	0.367925	0.608491	0.0235849	0.604651	0.0387597	0.0641026	0.58209	1.55422	0.0241546
LRRC52	0.344828	0.586207	0.0689655	0.588235	0.117647	0.2	0.526316	1.41667	0.0740741	0.344828	0.586207	0.0689655	0.588235	0.117647	0.2	0.526316	1.41667	0.0740741
LRRC8A	0.406091	0.563452	0.0304569	0.720721	0.0540541	0.075	0.683761	1.2907	0.0314136	0.406091	0.563452	0.0304569	0.720721	0.0540541	0.075	0.683761	1.2907	0.0314136
LRRD1	0.08	0.81	0.11	0.0987654	0.135802	1.375	0.0869565	4.26316	0.123596	0.08	0.81	0.11	0.0987654	0.135802	1.375	0.0869565	4.26316	0.123596
LRRFIP2	0.184	0.704	0.112	0.261364	0.159091	0.608696	0.22549	2.37838	0.126126	0.178295	0.682171	0.139535	0.261364	0.204545	0.782609	0.216981	2.14634	0.162162
LRRTM2	0.402878	0.553957	0.0431655	0.727273	0.0779221	0.107143	0.674699	1.24194	0.0451128	0.4	0.55	0.05	0.727273	0.0909091	0.125	0.666667	1.22222	0.0526316
LUC7L2	0.106195	0.716814	0.176991	0.148148	0.246914	1.66667	0.118812	2.53125	0.215054	0.106195	0.716814	0.176991	0.148148	0.246914	1.66667	0.118812	2.53125	0.215054
LUC7L2_ENST00000263545	0.0980392	0.745098	0.156863	0.131579	0.210526	1.6	0.108696	2.92308	0.186047	0.0980392	0.745098	0.156863	0.131579	0.210526	1.6	0.108696	2.92308	0.186047
LUC7L2_ENST00000541170	0.108911	0.732673	0.158416	0.148649	0.216216	1.45455	0.122222	2.74074	0.188235	0.106796	0.718447	0.174757	0.148649	0.243243	1.63636	0.119565	2.55172	0.211765
LUM	0.151261	0.815126	0.0336134	0.185567	0.0412371	0.222222	0.178218	4.40909	0.0347826	0.151261	0.815126	0.0336134	0.185567	0.0412371	0.222222	0.178218	4.40909	0.0347826
LUZP1	0.194872	0.682051	0.123077	0.285714	0.180451	0.631579	0.242038	2.14516	0.140351	0.191919	0.671717	0.136364	0.285714	0.203008	0.710526	0.2375	2.04615	0.157895
LUZP4	0.0948276	0.818966	0.0862069	0.115789	0.105263	0.909091	0.104762	4.52381	0.0943396	0.0948276	0.818966	0.0862069	0.115789	0.105263	0.909091	0.104762	4.52381	0.0943396
MALT1_ENST00000348428	0.126316	0.757895	0.115789	0.166667	0.152778	0.916667	0.144578	3.13043	0.130952	0.125	0.75	0.125	0.166667	0.166667	1	0.142857	3	0.142857
MAML2	0.355805	0.599251	0.0449438	0.59375	0.075	0.126316	0.552326	1.49533	0.0470588	0.355805	0.599251	0.0449438	0.59375	0.075	0.126316	0.552326	1.49533	0.0470588
MAN1A2	0.207692	0.638462	0.153846	0.325301	0.240964	0.740741	0.262136	1.76596	0.181818	0.204545	0.628788	0.166667	0.325301	0.26506	0.814815	0.257143	1.69388	0.2
MANEA	0.0961538	0.836538	0.0673077	0.114943	0.0804598	0.7	0.106383	5.11765	0.0721649	0.0952381	0.828571	0.0761905	0.114943	0.091954	0.8	0.105263	4.83333	0.0824742
MAP2K1	0.0772059	0.900735	0.0220588	0.0857143	0.0244898	0.285714	0.0836653	9.07407	0.0225564	0.0772059	0.900735	0.0220588	0.0857143	0.0244898	0.285714	0.0836653	9.07407	0.0225564
MAP2K4	0.0802469	0.743827	0.175926	0.107884	0.236515	2.19231	0.0872483	2.90361	0.213483	0.0795107	0.737003	0.183486	0.107884	0.248963	2.30769	0.0863787	2.80233	0.224719
MAP3K1_ENST00000399503	0.094162	0.728814	0.177024	0.129199	0.242894	1.88	0.10395	2.6875	0.215103	0.0919118	0.711397	0.196691	0.129199	0.276486	2.14	0.101215	2.46497	0.244851
MAP4_ENST00000395734	0.345361	0.608247	0.0463918	0.567797	0.0762712	0.134328	0.527559	1.55263	0.0486486	0.331683	0.584158	0.0841584	0.567797	0.144068	0.253731	0.496296	1.40476	0.0918919
MAP4K1_ENST00000396857	0.360577	0.596154	0.0432692	0.604839	0.0725806	0.12	0.56391	1.47619	0.0452261	0.360577	0.596154	0.0432692	0.604839	0.0725806	0.12	0.56391	1.47619	0.0452261
MAP7D1	0.194286	0.777143	0.0285714	0.25	0.0367647	0.147059	0.241135	3.48718	0.0294118	0.168317	0.673267	0.158416	0.25	0.235294	0.941176	0.202381	2.06061	0.188235
MAP9	0.143713	0.820359	0.0359281	0.175182	0.0437956	0.25	0.167832	4.56667	0.0372671	0.138728	0.791908	0.0693642	0.175182	0.0875912	0.5	0.161074	3.80556	0.0745342
MAPK1	0.136986	0.835616	0.0273973	0.163934	0.0327869	0.2	0.15873	5.08333	0.028169	0.136986	0.835616	0.0273973	0.163934	0.0327869	0.2	0.15873	5.08333	0.028169
MAPK13	0.411765	0.578431	0.00980392	0.711864	0.0169492	0.0238095	0.7	1.37209	0.00990099	0.407767	0.572816	0.0194175	0.711864	0.0338983	0.047619	0.688525	1.34091	0.019802
MAPK9_ENST00000452135	0.148515	0.821782	0.029703	0.180723	0.0361446	0.2	0.174419	4.61111	0.0306122	0.148515	0.821782	0.029703	0.180723	0.0361446	0.2	0.174419	4.61111	0.0306122
MARCH7	0.115702	0.818182	0.0661157	0.141414	0.0808081	0.571429	0.130841	4.5	0.0707965	0.112	0.792	0.096	0.141414	0.121212	0.857143	0.126126	3.80769	0.106195
MATR3	0.425	0.545833	0.0291667	0.778626	0.0534351	0.0686275	0.73913	1.20183	0.0300429	0.421488	0.541322	0.0371901	0.778626	0.0687023	0.0882353	0.728571	1.18018	0.0386266
MAX	0.0571429	0.821429	0.121429	0.0695652	0.147826	2.125	0.0606061	4.6	0.138211	0.0567376	0.815603	0.12766	0.0695652	0.156522	2.25	0.0601504	4.42308	0.146341
MAX_ENST00000284165	0.0263158	0.850877	0.122807	0.0309278	0.14433	4.66667	0.027027	5.70588	0.14	0.0263158	0.850877	0.122807	0.0309278	0.14433	4.66667	0.027027	5.70588	0.14
MAX_ENST00000556979	0.0186916	0.850467	0.130841	0.021978	0.153846	7	0.0190476	5.6875	0.150538	0.0186916	0.850467	0.130841	0.021978	0.153846	7	0.0190476	5.6875	0.150538
MBD6	0.235	0.695	0.07	0.338129	0.100719	0.297872	0.30719	2.27869	0.0752688	0.196653	0.58159	0.221757	0.338129	0.381295	1.12766	0.244792	1.39	0.284946
MBOAT1	0.293578	0.59633	0.110092	0.492308	0.184615	0.375	0.415584	1.47727	0.123711	0.293578	0.59633	0.110092	0.492308	0.184615	0.375	0.415584	1.47727	0.123711
MCHR2	0.317073	0.604878	0.0780488	0.524194	0.129032	0.246154	0.464286	1.53086	0.0846561	0.295455	0.563636	0.140909	0.524194	0.25	0.476923	0.419355	1.29167	0.164021
MCHR2_ENST00000369212	0.35	0.585	0.065	0.598291	0.111111	0.185714	0.538462	1.40964	0.0695187	0.35	0.585	0.065	0.598291	0.111111	0.185714	0.538462	1.40964	0.0695187
MCM6	0.217391	0.664596	0.118012	0.327103	0.17757	0.542857	0.277778	1.98148	0.133803	0.213415	0.652439	0.134146	0.327103	0.205607	0.628571	0.271318	1.87719	0.15493
MCM7	0.26087	0.623188	0.115942	0.418605	0.186047	0.444444	0.352941	1.65385	0.131148	0.258993	0.618705	0.122302	0.418605	0.197674	0.472222	0.349515	1.62264	0.139344
MCMDC2	0.111888	0.832168	0.0559441	0.134454	0.0672269	0.5	0.125984	4.95833	0.0592593	0.111111	0.826389	0.0625	0.134454	0.0756303	0.5625	0.125	4.76	0.0666667
MCMDC2_ENST00000313616	0.12	0.824	0.056	0.145631	0.0679612	0.466667	0.136364	4.68182	0.059322	0.12	0.824	0.056	0.145631	0.0679612	0.466667	0.136364	4.68182	0.059322
MCMDC2_ENST00000422365	0.111888	0.832168	0.0559441	0.134454	0.0672269	0.5	0.125984	4.95833	0.0592593	0.111111	0.826389	0.0625	0.134454	0.0756303	0.5625	0.125	4.76	0.0666667
MCPH1_ENST00000344683	0.277778	0.703704	0.0185185	0.394737	0.0263158	0.0666667	0.384615	2.375	0.0188679	0.234375	0.59375	0.171875	0.394737	0.289474	0.733333	0.306122	1.46154	0.207547
MDM2	0.0958084	0.868263	0.0359281	0.110345	0.0413793	0.375	0.10596	6.59091	0.0372671	0.0924855	0.83815	0.0693642	0.110345	0.0827586	0.75	0.101911	5.17857	0.0745342
MDM2_ENST00000462284	0.101911	0.859873	0.0382166	0.118519	0.0444444	0.375	0.113475	6.13636	0.0397351	0.0981595	0.828221	0.0736196	0.118519	0.0888889	0.75	0.108844	4.82143	0.0794702
MDM4	0.127389	0.834395	0.0382166	0.152672	0.0458015	0.3	0.145985	5.03846	0.0397351	0.125786	0.823899	0.0503145	0.152672	0.0610687	0.4	0.143885	4.67857	0.0529801
MED12	0.0525533	0.923153	0.0242935	0.056928	0.0263158	0.462264	0.0554683	12.0129	0.0248984	0.0510843	0.924819	0.0240964	0.0552371	0.0260552	0.471698	0.0538344	12.3013	0.0246914
MED12_ENST00000333646	0.0917108	0.850088	0.0582011	0.107884	0.0684647	0.634615	0.100971	5.67059	0.0617978	0.0917108	0.850088	0.0582011	0.107884	0.0684647	0.634615	0.100971	5.67059	0.0617978
MED12_ENST00000374080	0.121573	0.822408	0.0560191	0.147826	0.0681159	0.460784	0.138399	4.63087	0.0593434	0.121284	0.820452	0.058264	0.147826	0.0710145	0.480392	0.138024	4.56954	0.0618687
MEN1	0.114583	0.664062	0.221354	0.172549	0.333333	1.93182	0.129412	1.97674	0.284281	0.0973451	0.564159	0.338496	0.172549	0.6	3.47727	0.107843	1.29442	0.511706
MESP2	0.405405	0.585586	0.00900901	0.692308	0.0153846	0.0222222	0.681818	1.41304	0.00909091	0.391304	0.565217	0.0434783	0.692308	0.0769231	0.111111	0.642857	1.3	0.0454545
MFAP3L	0.417323	0.566929	0.015748	0.736111	0.0277778	0.0377358	0.716216	1.30909	0.016	0.417323	0.566929	0.015748	0.736111	0.0277778	0.0377358	0.716216	1.30909	0.016
MFRP	0.27907	0.674419	0.0465116	0.413793	0.0689655	0.166667	0.387097	2.07143	0.0487805	0.246575	0.59589	0.157534	0.413793	0.264368	0.638889	0.327273	1.47458	0.186992
MGA	0.138286	0.682286	0.179429	0.20268	0.262982	1.29752	0.160477	2.14748	0.218663	0.13565	0.669283	0.195067	0.20268	0.291457	1.43802	0.156939	2.02373	0.24234
MGAM	0.175	0.708333	0.116667	0.247059	0.164706	0.666667	0.212121	2.42857	0.132075	0.173554	0.702479	0.123967	0.247059	0.176471	0.714286	0.21	2.36111	0.141509
MGAT4C_ENST00000393205	0.148649	0.824324	0.027027	0.180328	0.0327869	0.181818	0.174603	4.69231	0.0277778	0.148649	0.824324	0.027027	0.180328	0.0327869	0.181818	0.174603	4.69231	0.0277778
MIS18BP1	0.157635	0.807882	0.0344828	0.195122	0.0426829	0.21875	0.187135	4.20513	0.0357143	0.136752	0.700855	0.162393	0.195122	0.231707	1.1875	0.158416	2.34286	0.193878
MLH1	0.129032	0.683871	0.187097	0.188679	0.273585	1.45	0.148148	2.16327	0.230159	0.121581	0.644377	0.234043	0.188679	0.363208	1.925	0.138408	1.81197	0.305556
MLL2_ENST00000301067	0.122057	0.662088	0.215856	0.184351	0.326023	1.76849	0.139025	1.95935	0.275275	0.115958	0.629008	0.255034	0.184351	0.405453	2.19936	0.131168	1.69548	0.342342
MLL3_ENST00000355193	0.112722	0.694107	0.193171	0.162399	0.278302	1.71369	0.127043	2.26911	0.23942	0.109795	0.676082	0.214123	0.162399	0.316712	1.95021	0.123337	2.0872	0.272464
MLL4	0.215088	0.672552	0.11236	0.319809	0.167064	0.522388	0.274029	2.05392	0.126582	0.204268	0.63872	0.157012	0.319809	0.245823	0.768657	0.256705	1.76793	0.186257
MLLT3	0.626866	0.354478	0.0186567	1.76842	0.0526316	0.0297619	1.68	0.549133	0.0190114	0.610909	0.345455	0.0436364	1.76842	0.126316	0.0714286	1.57009	0.527778	0.0456274
MLLT4_ENST00000392108	0.163435	0.720222	0.116343	0.226923	0.161538	0.711864	0.195364	2.57426	0.131661	0.161644	0.712329	0.126027	0.226923	0.176923	0.779661	0.19281	2.47619	0.144201
MMP13	0.165644	0.822086	0.0122699	0.201493	0.0149254	0.0740741	0.198529	4.62069	0.0124224	0.165644	0.822086	0.0122699	0.201493	0.0149254	0.0740741	0.198529	4.62069	0.0124224
MMP14	0.408759	0.576642	0.0145985	0.708861	0.0253165	0.0357143	0.691358	1.36207	0.0148148	0.408759	0.576642	0.0145985	0.708861	0.0253165	0.0357143	0.691358	1.36207	0.0148148
MORC4	0.175676	0.695946	0.128378	0.252427	0.184466	0.730769	0.213115	2.28889	0.147287	0.175676	0.695946	0.128378	0.252427	0.184466	0.730769	0.213115	2.28889	0.147287
MOS	0.365385	0.602564	0.0320513	0.606383	0.0531915	0.0877193	0.575758	1.51613	0.0331126	0.365385	0.602564	0.0320513	0.606383	0.0531915	0.0877193	0.575758	1.51613	0.0331126
MPL	0.121622	0.831081	0.0472973	0.146341	0.0569106	0.388889	0.138462	4.92	0.0496454	0.121212	0.828283	0.0505051	0.146341	0.0609756	0.416667	0.137931	4.82353	0.0531915
MPP5	0.177966	0.70339	0.118644	0.253012	0.168675	0.666667	0.216495	2.37143	0.134615	0.175	0.691667	0.133333	0.253012	0.192771	0.761905	0.212121	2.24324	0.153846
MRE11A	0.131915	0.791489	0.0765957	0.166667	0.0967742	0.580645	0.151961	3.79592	0.0829493	0.120623	0.723735	0.155642	0.166667	0.215054	1.29032	0.137168	2.61972	0.184332
MRE11A_ENST00000323929	0.125523	0.799163	0.0753138	0.157068	0.0942408	0.6	0.143541	3.97917	0.081448	0.114504	0.729008	0.156489	0.157068	0.21466	1.36667	0.12931	2.69014	0.18552
MRGPRD	0.358491	0.622642	0.0188679	0.575758	0.030303	0.0526316	0.558824	1.65	0.0192308	0.351852	0.611111	0.037037	0.575758	0.0606061	0.105263	0.542857	1.57143	0.0384615
MRGPRX1	0.388	0.588	0.024	0.659864	0.0408163	0.0618557	0.633987	1.42718	0.0245902	0.388	0.588	0.024	0.659864	0.0408163	0.0618557	0.633987	1.42718	0.0245902
MSH2	0.122563	0.649025	0.228412	0.188841	0.351931	1.86364	0.139683	1.84921	0.296029	0.118919	0.62973	0.251351	0.188841	0.399142	2.11364	0.134969	1.70073	0.33574
MSH3	0.239024	0.707317	0.0536585	0.337931	0.0758621	0.22449	0.314103	2.41667	0.056701	0.202479	0.599174	0.198347	0.337931	0.331034	0.979592	0.253886	1.49485	0.247423
MSH3_ENST00000265081	0.247423	0.701031	0.0515464	0.352941	0.0735294	0.208333	0.328767	2.34483	0.0543478	0.209607	0.593886	0.196507	0.352941	0.330882	0.9375	0.265193	1.46237	0.244565
MSH6	0.107527	0.744086	0.148387	0.144509	0.199422	1.38	0.120482	2.90756	0.174242	0.0924214	0.639556	0.268022	0.144509	0.419075	2.9	0.101833	1.77436	0.366162
MSI1	0.355769	0.625	0.0192308	0.569231	0.0307692	0.0540541	0.552239	1.66667	0.0196078	0.355769	0.625	0.0192308	0.569231	0.0307692	0.0540541	0.552239	1.66667	0.0196078
MSL2	0.434483	0.517241	0.0482759	0.84	0.0933333	0.111111	0.768293	1.07143	0.0507246	0.422819	0.503356	0.0738255	0.84	0.146667	0.174603	0.732558	1.01351	0.0797101
MSL3_ENST00000398527	0.134615	0.817308	0.0480769	0.164706	0.0588235	0.357143	0.155556	4.47368	0.0505051	0.134615	0.817308	0.0480769	0.164706	0.0588235	0.357143	0.155556	4.47368	0.0505051
MSN	0.369318	0.573864	0.0568182	0.643564	0.0990099	0.153846	0.585586	1.34667	0.060241	0.369318	0.573864	0.0568182	0.643564	0.0990099	0.153846	0.585586	1.34667	0.060241
MTF2	0.125	0.759615	0.115385	0.164557	0.151899	0.923077	0.142857	3.16	0.130435	0.116071	0.705357	0.178571	0.164557	0.253165	1.53846	0.131313	2.39394	0.217391
MTMR2	0.23301	0.61165	0.15534	0.380952	0.253968	0.666667	0.303797	1.575	0.183908	0.23301	0.61165	0.15534	0.380952	0.253968	0.666667	0.303797	1.575	0.183908
MTMR2_ENST00000346299	0.238938	0.60177	0.159292	0.397059	0.264706	0.666667	0.313953	1.51111	0.189474	0.238938	0.60177	0.159292	0.397059	0.264706	0.666667	0.313953	1.51111	0.189474
MTNR1A	0.438356	0.527397	0.0342466	0.831169	0.0649351	0.078125	0.780488	1.11594	0.035461	0.438356	0.527397	0.0342466	0.831169	0.0649351	0.078125	0.780488	1.11594	0.035461
MTOR	0.133215	0.824156	0.0426288	0.161638	0.0517241	0.32	0.153689	4.68687	0.0445269	0.132743	0.821239	0.0460177	0.161638	0.0560345	0.346667	0.153061	4.59406	0.0482375
MVK										0.206612	0.504132	0.289256	0.409836	0.57377	1.4	0.260417	1.01667	0.406977
MXRA8										0.18254	0.52381	0.293651	0.348485	0.560606	1.6087	0.223301	1.1	0.41573
MYADM	0.397059	0.602941	0	0.658537	0	0	0.658537	1.51852	0	0.397059	0.602941	0	0.658537	0	0	0.658537	1.51852	0
MYC	0.159091	0.824675	0.0162338	0.192913	0.019685	0.102041	0.189189	4.7037	0.0165017	0.158576	0.822006	0.0194175	0.192913	0.023622	0.122449	0.188462	4.61818	0.019802
MYC_ENST00000377970	0.160494	0.824074	0.0154321	0.194757	0.0187266	0.0961538	0.191176	4.68421	0.015674	0.16	0.821538	0.0184615	0.194757	0.0224719	0.115385	0.190476	4.60345	0.0188088
MYCBP2_ENST00000360084	0.186275	0.686275	0.127451	0.271429	0.185714	0.684211	0.228916	2.1875	0.146067	0.186275	0.686275	0.127451	0.271429	0.185714	0.684211	0.228916	2.1875	0.146067
MYCL1_ENST00000397332	0.109091	0.818182	0.0727273	0.133333	0.0888889	0.666667	0.122449	4.5	0.0784314	0.109091	0.818182	0.0727273	0.133333	0.0888889	0.666667	0.122449	4.5	0.0784314
MYCN	0.0909091	0.888112	0.020979	0.102362	0.023622	0.230769	0.1	7.9375	0.0214286	0.0890411	0.869863	0.0410959	0.102362	0.0472441	0.461538	0.0977444	6.68421	0.0428571
MYD88	0.0309524	0.954762	0.0142857	0.032419	0.0149626	0.461538	0.031941	21.1053	0.0144928	0.0309524	0.954762	0.0142857	0.032419	0.0149626	0.461538	0.031941	21.1053	0.0144928
MYD88_ENST00000417037	0.0992366	0.854962	0.0458015	0.116071	0.0535714	0.461538	0.110169	5.89474	0.048	0.0992366	0.854962	0.0458015	0.116071	0.0535714	0.461538	0.110169	5.89474	0.048
N4BP2L2	0.135922	0.834951	0.0291262	0.162791	0.0348837	0.214286	0.157303	5.05882	0.03	0.135922	0.834951	0.0291262	0.162791	0.0348837	0.214286	0.157303	5.05882	0.03
NAA15	0.115646	0.727891	0.156463	0.158879	0.214953	1.35294	0.130769	2.675	0.185484	0.115646	0.727891	0.156463	0.158879	0.214953	1.35294	0.130769	2.675	0.185484
NAA35	0.106195	0.823009	0.0707965	0.129032	0.0860215	0.666667	0.118812	4.65	0.0761905	0.102564	0.794872	0.102564	0.129032	0.129032	1	0.114286	3.875	0.114286
NAPRT1_ENST00000276844	0.205607	0.682243	0.11215	0.30137	0.164384	0.545455	0.258824	2.14706	0.126316	0.205607	0.682243	0.11215	0.30137	0.164384	0.545455	0.258824	2.14706	0.126316
NAPRT1_ENST00000449291	0.174757	0.708738	0.116505	0.246575	0.164384	0.666667	0.211765	2.43333	0.131868	0.171429	0.695238	0.133333	0.246575	0.191781	0.777778	0.206897	2.28125	0.153846
NARFL	0.423423	0.540541	0.036036	0.783333	0.0666667	0.0851064	0.734375	1.17647	0.0373832	0.412281	0.526316	0.0614035	0.783333	0.116667	0.148936	0.701493	1.11111	0.0654206
NBN	0.108696	0.821739	0.0695652	0.132275	0.0846561	0.64	0.121951	4.60976	0.0747664	0.0943396	0.713208	0.192453	0.132275	0.269841	2.04	0.104167	2.48684	0.238318
NCK2	0.380282	0.591549	0.028169	0.642857	0.047619	0.0740741	0.613636	1.44828	0.0289855	0.380282	0.591549	0.028169	0.642857	0.047619	0.0740741	0.613636	1.44828	0.0289855
NCK2_ENST00000233154	0.372549	0.601307	0.0261438	0.619565	0.0434783	0.0701754	0.59375	1.5082	0.0268456	0.372549	0.601307	0.0261438	0.619565	0.0434783	0.0701754	0.59375	1.5082	0.0268456
NCOR1	0.1323	0.709178	0.158522	0.186555	0.223529	1.1982	0.152473	2.43852	0.188385	0.130435	0.699177	0.170388	0.186555	0.243697	1.30631	0.15	2.32422	0.205382
NCOR1_ENST00000395851	0.132051	0.701282	0.166667	0.1883	0.23766	1.26214	0.152142	2.34764	0.2	0.132051	0.701282	0.166667	0.1883	0.23766	1.26214	0.152142	2.34764	0.2
NCOR1_ENST00000436828	0.0542636	0.75969	0.186047	0.0714286	0.244898	3.42857	0.057377	3.16129	0.228571	0.0542636	0.75969	0.186047	0.0714286	0.244898	3.42857	0.057377	3.16129	0.228571
NDST1	0.360406	0.619289	0.0203046	0.581967	0.0327869	0.056338	0.563492	1.62667	0.0207254	0.360406	0.619289	0.0203046	0.581967	0.0327869	0.056338	0.563492	1.62667	0.0207254
NDUFS1	0.110169	0.847458	0.0423729	0.13	0.05	0.384615	0.12381	5.55556	0.0442478	0.110169	0.847458	0.0423729	0.13	0.05	0.384615	0.12381	5.55556	0.0442478
NEK1_ENST00000507142	0.190955	0.728643	0.080402	0.262069	0.110345	0.421053	0.236025	2.68519	0.0874317	0.171946	0.656109	0.171946	0.262069	0.262069	1	0.20765	1.90789	0.20765
NEUROD6	0.4329	0.515152	0.0519481	0.840336	0.10084	0.12	0.763359	1.0625	0.0547945	0.41841	0.497908	0.083682	0.840336	0.168067	0.2	0.719424	0.991667	0.0913242
NF1	0.101621	0.597257	0.301122	0.170146	0.504175	2.96319	0.113116	1.48297	0.430865	0.0967359	0.569139	0.334125	0.169969	0.58707	3.45399	0.107096	1.32094	0.501783
NF1_ENST00000358273	0.105449	0.619958	0.274593	0.170091	0.442922	2.60403	0.11788	1.63128	0.378537	0.103616	0.609179	0.287204	0.170091	0.471461	2.77181	0.115593	1.55872	0.402927
NF1_ENST00000444181	0.0861244	0.626794	0.287081	0.137405	0.458015	3.33333	0.0942408	1.67949	0.402685	0.0857143	0.62381	0.290476	0.137405	0.465649	3.38889	0.09375	1.65823	0.409396
NF2	0.0433925	0.392505	0.564103	0.110553	1.43719	13	0.0453608	0.646104	1.29412	0.0332829	0.301059	0.665658	0.110553	2.21106	20	0.0344288	0.430736	1.99095
NF2_ENST00000403999	0.0503597	0.564748	0.384892	0.089172	0.681529	7.64286	0.0530303	1.29752	0.625731	0.0456026	0.511401	0.442997	0.089172	0.866242	9.71429	0.0477816	1.04667	0.795322
NFE2L1	0.35503	0.585799	0.0591716	0.606061	0.10101	0.166667	0.550459	1.41429	0.0628931	0.337079	0.55618	0.106742	0.606061	0.191919	0.316667	0.508475	1.25316	0.119497
NFE2L2	0.0409836	0.934426	0.0245902	0.0438596	0.0263158	0.6	0.042735	14.25	0.0252101	0.0409836	0.934426	0.0245902	0.0438596	0.0263158	0.6	0.042735	14.25	0.0252101
NFIX	0.346774	0.596774	0.0564516	0.581081	0.0945946	0.162791	0.530864	1.48	0.0598291	0.346774	0.596774	0.0564516	0.581081	0.0945946	0.162791	0.530864	1.48	0.0598291
NFIX_ENST00000360105	0.352459	0.590164	0.057377	0.597222	0.0972222	0.162791	0.544304	1.44	0.0608696	0.352459	0.590164	0.057377	0.597222	0.0972222	0.162791	0.544304	1.44	0.0608696
NGFR	0.374046	0.603053	0.0229008	0.620253	0.0379747	0.0612245	0.597561	1.51923	0.0234375	0.374046	0.603053	0.0229008	0.620253	0.0379747	0.0612245	0.597561	1.51923	0.0234375
NGLY1_ENST00000428257	0.153285	0.722628	0.124088	0.212121	0.171717	0.809524	0.181034	2.60526	0.141667	0.153285	0.722628	0.124088	0.212121	0.171717	0.809524	0.181034	2.60526	0.141667
NIPBL	0.182741	0.717428	0.0998308	0.254717	0.139151	0.546296	0.223602	2.53892	0.110902	0.173077	0.679487	0.147436	0.254717	0.216981	0.851852	0.209302	2.12	0.172932
NLRC3	0.357827	0.603834	0.0383387	0.592593	0.0634921	0.107143	0.557214	1.52419	0.0398671	0.357827	0.603834	0.0383387	0.592593	0.0634921	0.107143	0.557214	1.52419	0.0398671
NMT2	0.126214	0.815534	0.0582524	0.154762	0.0714286	0.461538	0.144444	4.42105	0.0618557	0.126214	0.815534	0.0582524	0.154762	0.0714286	0.461538	0.144444	4.42105	0.0618557
NMUR2	0.373134	0.604478	0.0223881	0.617284	0.037037	0.06	0.595238	1.5283	0.0229008	0.373134	0.604478	0.0223881	0.617284	0.037037	0.06	0.595238	1.5283	0.0229008
NONO	0.103175	0.825397	0.0714286	0.125	0.0865385	0.692308	0.115044	4.72727	0.0769231	0.102362	0.818898	0.0787402	0.125	0.0961538	0.769231	0.114035	4.52174	0.0854701
NOSTRIN_ENST00000444448										0.196078	0.637255	0.166667	0.307692	0.261538	0.85	0.243902	1.75676	0.2
NOTCH1	0.111111	0.750765	0.138124	0.147997	0.183978	1.24312	0.125	3.01227	0.16026	0.110157	0.744315	0.145528	0.147997	0.195519	1.3211	0.123793	2.91107	0.170313
NOTCH1_ENST00000277541	0.115364	0.748787	0.135849	0.154068	0.181425	1.17757	0.130408	2.98069	0.157205	0.114684	0.744373	0.140943	0.154068	0.189345	1.22897	0.12954	2.91195	0.164067
NOTCH2	0.115044	0.762045	0.122911	0.150968	0.16129	1.06838	0.13	3.20248	0.140135	0.114035	0.755361	0.130604	0.150968	0.172903	1.1453	0.128713	3.08765	0.150224
NOTCH4	0.119745	0.831847	0.0484076	0.143951	0.058193	0.404255	0.136035	4.94697	0.0508701	0.118537	0.823455	0.0580076	0.143951	0.0704441	0.489362	0.134478	4.66429	0.0615797
NOVA1	0.431548	0.517857	0.0505952	0.833333	0.0977011	0.117241	0.759162	1.07407	0.0532915	0.426471	0.511765	0.0617647	0.833333	0.12069	0.144828	0.74359	1.04819	0.0658307
NOX5_ENST00000388866	0.152174	0.818841	0.0289855	0.185841	0.0353982	0.190476	0.179487	4.52	0.0298507	0.152174	0.818841	0.0289855	0.185841	0.0353982	0.190476	0.179487	4.52	0.0298507
NPEPPS	0.352201	0.584906	0.0628931	0.602151	0.107527	0.178571	0.543689	1.40909	0.0671141	0.352201	0.584906	0.0628931	0.602151	0.107527	0.178571	0.543689	1.40909	0.0671141
NPIPL3	0.3625	0.625	0.0125	0.58	0.02	0.0344828	0.568627	1.66667	0.0126582	0.3625	0.625	0.0125	0.58	0.02	0.0344828	0.568627	1.66667	0.0126582
NPTX2	0.390244	0.597561	0.0121951	0.653061	0.0204082	0.03125	0.64	1.48485	0.0123457	0.387879	0.593939	0.0181818	0.653061	0.0306122	0.046875	0.633663	1.46269	0.0185185
NRAS	0.00759144	0.988958	0.00345066	0.0076762	0.00348918	0.454545	0.00764951	89.5625	0.0034626	0.00759144	0.988958	0.00345066	0.0076762	0.00348918	0.454545	0.00764951	89.5625	0.0034626
NSUN6	0.154545	0.681818	0.163636	0.226667	0.24	1.05882	0.182796	2.14286	0.195652	0.147826	0.652174	0.2	0.226667	0.306667	1.35294	0.173469	1.875	0.25
NT5C2	0.139706	0.838235	0.0220588	0.166667	0.0263158	0.157895	0.162393	5.18182	0.0225564	0.138686	0.832117	0.0291971	0.166667	0.0350877	0.210526	0.161017	4.95652	0.0300752
NTNG2	0.396476	0.585903	0.0176211	0.676692	0.0300752	0.0444444	0.656934	1.41489	0.0179372	0.394737	0.583333	0.0219298	0.676692	0.037594	0.0555556	0.652174	1.4	0.0224215
NTNG2_ENST00000360670	0.414747	0.56682	0.0184332	0.731707	0.0325203	0.0444444	0.708661	1.30851	0.0187793	0.414747	0.56682	0.0184332	0.731707	0.0325203	0.0444444	0.708661	1.30851	0.0187793
NTNG2_ENST00000372179	0.43956	0.554945	0.00549451	0.792079	0.00990099	0.0125	0.784314	1.24691	0.00552486	0.43956	0.554945	0.00549451	0.792079	0.00990099	0.0125	0.784314	1.24691	0.00552486
NTRK2	0.132653	0.82398	0.0433673	0.160991	0.0526316	0.326923	0.152941	4.68116	0.0453333	0.132653	0.82398	0.0433673	0.160991	0.0526316	0.326923	0.152941	4.68116	0.0453333
NTRK2_ENST00000304053	0.140351	0.828947	0.0307018	0.169312	0.037037	0.21875	0.163265	4.84615	0.0316742	0.140351	0.828947	0.0307018	0.169312	0.037037	0.21875	0.163265	4.84615	0.0316742
NTRK2_ENST00000376214	0.131234	0.824147	0.0446194	0.159236	0.0541401	0.34	0.151057	4.68657	0.0467033	0.131234	0.824147	0.0446194	0.159236	0.0541401	0.34	0.151057	4.68657	0.0467033
NTRK2_ENST00000395882	0.145251	0.826816	0.027933	0.175676	0.0337838	0.192308	0.169935	4.77419	0.0287356	0.145251	0.826816	0.027933	0.175676	0.0337838	0.192308	0.169935	4.77419	0.0287356
NUB1										0.285714	0.553571	0.160714	0.516129	0.290323	0.5625	0.4	1.24	0.191489
NXF1	0.21519	0.670886	0.113924	0.320755	0.169811	0.529412	0.274194	2.03846	0.128571	0.21519	0.670886	0.113924	0.320755	0.169811	0.529412	0.274194	2.03846	0.128571
NXN	0.380952	0.587302	0.031746	0.648649	0.0540541	0.0833333	0.615385	1.42308	0.0327869	0.380952	0.587302	0.031746	0.648649	0.0540541	0.0833333	0.615385	1.42308	0.0327869
NXPE1	0.118056	0.854167	0.0277778	0.138211	0.0325203	0.235294	0.133858	5.85714	0.0285714	0.118056	0.854167	0.0277778	0.138211	0.0325203	0.235294	0.133858	5.85714	0.0285714
ODF2L_ENST00000294678										0.1	0.77	0.13	0.12987	0.168831	1.3	0.111111	3.34783	0.149425
ODF2L_ENST00000359242										0.11	0.77	0.12	0.142857	0.155844	1.09091	0.123596	3.34783	0.136364
OFD1	0.151376	0.733945	0.114679	0.20625	0.15625	0.757576	0.178378	2.75862	0.129534	0.141026	0.683761	0.175214	0.20625	0.25625	1.24242	0.164179	2.16216	0.212435
OGT	0.125654	0.853403	0.0209424	0.147239	0.0245399	0.166667	0.143713	5.82143	0.0213904	0.124352	0.84456	0.0310881	0.147239	0.0368098	0.25	0.142012	5.43333	0.0320856
OGT_ENST00000373719	0.132979	0.845745	0.0212766	0.157233	0.0251572	0.16	0.153374	5.48276	0.0217391	0.131579	0.836842	0.0315789	0.157233	0.0377358	0.24	0.151515	5.12903	0.0326087
OLAH										0.137255	0.637255	0.22549	0.215385	0.353846	1.64286	0.159091	1.75676	0.291139
OPRL1	0.424837	0.568627	0.00653595	0.747126	0.0114943	0.0153846	0.738636	1.31818	0.00657895	0.424837	0.568627	0.00653595	0.747126	0.0114943	0.0153846	0.738636	1.31818	0.00657895
OPRM1_ENST00000414028	0.353448	0.577586	0.0689655	0.61194	0.119403	0.195122	0.546667	1.36735	0.0740741	0.353448	0.577586	0.0689655	0.61194	0.119403	0.195122	0.546667	1.36735	0.0740741
OPRM1_ENST00000419506	0.324324	0.594595	0.0810811	0.545455	0.136364	0.25	0.48	1.46667	0.0882353	0.324324	0.594595	0.0810811	0.545455	0.136364	0.25	0.48	1.46667	0.0882353
OPTN	0.196078	0.705882	0.0980392	0.277778	0.138889	0.5	0.243902	2.4	0.108696	0.176991	0.637168	0.185841	0.277778	0.291667	1.05	0.215054	1.7561	0.228261
OR10G7	0.375661	0.613757	0.010582	0.612069	0.0172414	0.028169	0.601695	1.58904	0.0106952	0.375661	0.613757	0.010582	0.612069	0.0172414	0.028169	0.601695	1.58904	0.0106952
OR10G8	0.38835	0.597087	0.0145631	0.650407	0.0243902	0.0375	0.634921	1.48193	0.0147783	0.38835	0.597087	0.0145631	0.650407	0.0243902	0.0375	0.634921	1.48193	0.0147783
OR10H1	0.375	0.618056	0.00694444	0.606742	0.011236	0.0185185	0.6	1.61818	0.00699301	0.372414	0.613793	0.0137931	0.606742	0.0224719	0.037037	0.593407	1.58929	0.013986
OR10H2	0.407407	0.562963	0.0296296	0.723684	0.0526316	0.0727273	0.6875	1.28814	0.0305344	0.40146	0.554745	0.0437956	0.723684	0.0789474	0.109091	0.670732	1.2459	0.0458015
OR10P1	0.365217	0.634783	0	0.575342	0	0	0.575342	1.7381	0	0.365217	0.634783	0	0.575342	0	0	0.575342	1.7381	0
OR10R2	0.356098	0.629268	0.0146341	0.565891	0.0232558	0.0410959	0.55303	1.69737	0.0148515	0.356098	0.629268	0.0146341	0.565891	0.0232558	0.0410959	0.55303	1.69737	0.0148515
OR10Z1	0.333333	0.618357	0.0483092	0.539062	0.078125	0.144928	0.5	1.62025	0.0507614	0.315068	0.584475	0.100457	0.539062	0.171875	0.318841	0.46	1.40659	0.111675
OR11G2	0.368421	0.573684	0.0578947	0.642202	0.100917	0.157143	0.583333	1.34568	0.0614525	0.368421	0.573684	0.0578947	0.642202	0.100917	0.157143	0.583333	1.34568	0.0614525
OR1C1	0.383085	0.59204	0.0248756	0.647059	0.0420168	0.0649351	0.620968	1.45122	0.0255102	0.383085	0.59204	0.0248756	0.647059	0.0420168	0.0649351	0.620968	1.45122	0.0255102
OR1F1	0.386861	0.605839	0.00729927	0.638554	0.0120482	0.0188679	0.630952	1.53704	0.00735294	0.386861	0.605839	0.00729927	0.638554	0.0120482	0.0188679	0.630952	1.53704	0.00735294
OR1G1	0.396226	0.603774	0	0.65625	0	0	0.65625	1.52381	0	0.396226	0.603774	0	0.65625	0	0	0.65625	1.52381	0
OR2A12	0.380117	0.590643	0.0292398	0.643564	0.049505	0.0769231	0.613208	1.44286	0.0301205	0.380117	0.590643	0.0292398	0.643564	0.049505	0.0769231	0.613208	1.44286	0.0301205
OR2A2	0.40678	0.570621	0.0225989	0.712871	0.039604	0.0555556	0.685714	1.32895	0.0231214	0.40678	0.570621	0.0225989	0.712871	0.039604	0.0555556	0.685714	1.32895	0.0231214
OR2A5	0.384259	0.606481	0.00925926	0.633588	0.0152672	0.0240964	0.62406	1.54118	0.00934579	0.380734	0.600917	0.0183486	0.633588	0.0305344	0.0481928	0.614815	1.50575	0.0186916
OR2B11	0.383234	0.57485	0.0419162	0.666667	0.0729167	0.109375	0.621359	1.35211	0.04375	0.378698	0.568047	0.0532544	0.666667	0.09375	0.140625	0.609524	1.31507	0.05625
OR2C1	0.385321	0.605505	0.00917431	0.636364	0.0151515	0.0238095	0.626866	1.53488	0.00925926	0.385321	0.605505	0.00917431	0.636364	0.0151515	0.0238095	0.626866	1.53488	0.00925926
OR2J2	0.214765	0.704698	0.0805369	0.304762	0.114286	0.375	0.273504	2.38636	0.0875912	0.193939	0.636364	0.169697	0.304762	0.266667	0.875	0.240602	1.75	0.20438
OR2L1P	0.367925	0.622642	0.00943396	0.590909	0.0151515	0.025641	0.58209	1.65	0.00952381	0.367925	0.622642	0.00943396	0.590909	0.0151515	0.025641	0.58209	1.65	0.00952381
OR2T34	0.384615	0.589744	0.025641	0.652174	0.0434783	0.0666667	0.625	1.4375	0.0263158	0.384615	0.589744	0.025641	0.652174	0.0434783	0.0666667	0.625	1.4375	0.0263158
OR2T4	0.356589	0.593023	0.0503876	0.601307	0.0849673	0.141304	0.554217	1.45714	0.0530612	0.356589	0.593023	0.0503876	0.601307	0.0849673	0.141304	0.554217	1.45714	0.0530612
OR2W3	0.372197	0.605381	0.0224215	0.614815	0.037037	0.060241	0.592857	1.53409	0.0229358	0.364035	0.592105	0.0438596	0.614815	0.0740741	0.120482	0.572414	1.45161	0.0458716
OR2Y1	0.361111	0.611111	0.0277778	0.590909	0.0454545	0.0769231	0.565217	1.57143	0.0285714	0.319672	0.540984	0.139344	0.590909	0.257576	0.435897	0.46988	1.17857	0.161905
OR3A4	0.377358	0.613208	0.00943396	0.615385	0.0153846	0.025	0.606061	1.58537	0.00952381	0.377358	0.613208	0.00943396	0.615385	0.0153846	0.025	0.606061	1.58537	0.00952381
OR4C3	0.40099	0.574257	0.0247525	0.698276	0.0431034	0.0617284	0.669421	1.34884	0.0253807	0.40099	0.574257	0.0247525	0.698276	0.0431034	0.0617284	0.669421	1.34884	0.0253807
OR4D1	0.409091	0.536364	0.0545455	0.762712	0.101695	0.133333	0.692308	1.15686	0.0576923	0.409091	0.536364	0.0545455	0.762712	0.101695	0.133333	0.692308	1.15686	0.0576923
OR4D9	0.356643	0.643357	0	0.554348	0	0	0.554348	1.80392	0	0.356643	0.643357	0	0.554348	0	0	0.554348	1.80392	0
OR4X2	0.417112	0.566845	0.0160428	0.735849	0.0283019	0.0384615	0.715596	1.30864	0.0163043	0.417112	0.566845	0.0160428	0.735849	0.0283019	0.0384615	0.715596	1.30864	0.0163043
OR52N5	0.356522	0.626087	0.0173913	0.569444	0.0277778	0.0487805	0.554054	1.67442	0.0176991	0.317829	0.55814	0.124031	0.569444	0.222222	0.390244	0.465909	1.26316	0.141593
OR5AK2	0.405797	0.586957	0.00724638	0.691358	0.0123457	0.0178571	0.682927	1.42105	0.00729927	0.4	0.578571	0.0214286	0.691358	0.037037	0.0535714	0.666667	1.37288	0.0218978
OR5AU1	0.364486	0.616822	0.0186916	0.590909	0.030303	0.0512821	0.573529	1.60976	0.0190476	0.361111	0.611111	0.0277778	0.590909	0.0454545	0.0769231	0.565217	1.57143	0.0285714
OR5B2	0.364341	0.620155	0.0155039	0.5875	0.025	0.0425532	0.573171	1.63265	0.015748	0.361538	0.615385	0.0230769	0.5875	0.0375	0.0638298	0.566265	1.6	0.023622
OR5M10	0.356643	0.608392	0.034965	0.586207	0.0574713	0.0980392	0.554348	1.55357	0.0362319	0.356643	0.608392	0.034965	0.586207	0.0574713	0.0980392	0.554348	1.55357	0.0362319
OR6C65	0.373984	0.601626	0.0243902	0.621622	0.0405405	0.0652174	0.597403	1.5102	0.025	0.362205	0.582677	0.0551181	0.621622	0.0945946	0.152174	0.567901	1.39623	0.0583333
OR6C75	0.215686	0.764706	0.0196078	0.282051	0.025641	0.0909091	0.275	3.25	0.02	0.180328	0.639344	0.180328	0.282051	0.282051	1	0.22	1.77273	0.22
OR6M1	0.395522	0.567164	0.0373134	0.697368	0.0657895	0.0943396	0.654321	1.31034	0.0387597	0.395522	0.567164	0.0373134	0.697368	0.0657895	0.0943396	0.654321	1.31034	0.0387597
OR7C1	0.339623	0.641509	0.0188679	0.529412	0.0294118	0.0555556	0.514286	1.78947	0.0192308	0.302521	0.571429	0.12605	0.529412	0.220588	0.416667	0.433735	1.33333	0.144231
OR7C2	0.342857	0.638095	0.0190476	0.537313	0.0298507	0.0555556	0.521739	1.76316	0.0194175	0.313043	0.582609	0.104348	0.537313	0.179104	0.333333	0.455696	1.39583	0.116505
OR8B12	0.378882	0.614907	0.00621118	0.616162	0.010101	0.0163934	0.61	1.59677	0.00625	0.378882	0.614907	0.00621118	0.616162	0.010101	0.0163934	0.61	1.59677	0.00625
OR9A4	0.352273	0.596591	0.0511364	0.590476	0.0857143	0.145161	0.54386	1.47887	0.0538922	0.321244	0.544041	0.134715	0.590476	0.247619	0.419355	0.473282	1.19318	0.155689
OR9G1	0.328244	0.59542	0.0763359	0.551282	0.128205	0.232558	0.488636	1.4717	0.0826446	0.328244	0.59542	0.0763359	0.551282	0.128205	0.232558	0.488636	1.4717	0.0826446
OTX1	0.368	0.608	0.024	0.605263	0.0394737	0.0652174	0.582278	1.55102	0.0245902	0.368	0.608	0.024	0.605263	0.0394737	0.0652174	0.582278	1.55102	0.0245902
OTX2	0.355705	0.577181	0.0671141	0.616279	0.116279	0.188679	0.552083	1.36508	0.0719424	0.335443	0.544304	0.120253	0.616279	0.22093	0.358491	0.504762	1.19444	0.136691
OXSM										0.128713	0.712871	0.158416	0.180556	0.222222	1.23077	0.147727	2.48276	0.188235
P2RY2	0.359155	0.612676	0.028169	0.586207	0.045977	0.0784314	0.56044	1.58182	0.0289855	0.359155	0.612676	0.028169	0.586207	0.045977	0.0784314	0.56044	1.58182	0.0289855
PACSIN2	0.4	0.530769	0.0692308	0.753623	0.130435	0.173077	0.666667	1.13115	0.0743802	0.4	0.530769	0.0692308	0.753623	0.130435	0.173077	0.666667	1.13115	0.0743802
PAN3	0.19375	0.6875	0.11875	0.281818	0.172727	0.612903	0.24031	2.2	0.134752	0.19375	0.6875	0.11875	0.281818	0.172727	0.612903	0.24031	2.2	0.134752
PAN3_ENST00000380958	0.178771	0.703911	0.117318	0.253968	0.166667	0.65625	0.217687	2.37736	0.132911	0.178771	0.703911	0.117318	0.253968	0.166667	0.65625	0.217687	2.37736	0.132911
PAOX_ENST00000357296	0.372727	0.6	0.0272727	0.621212	0.0454545	0.0731707	0.594203	1.5	0.0280374	0.369369	0.594595	0.036036	0.621212	0.0606061	0.097561	0.585714	1.46667	0.0373832
PARN	0.110092	0.834862	0.0550459	0.131868	0.0659341	0.5	0.123711	5.05556	0.0582524	0.110092	0.834862	0.0550459	0.131868	0.0659341	0.5	0.123711	5.05556	0.0582524
PARN_ENST00000437198	0.104762	0.838095	0.0571429	0.125	0.0681818	0.545455	0.117021	5.17647	0.0606061	0.104762	0.838095	0.0571429	0.125	0.0681818	0.545455	0.117021	5.17647	0.0606061
PAX2_ENST00000428433	0.259259	0.731481	0.00925926	0.35443	0.0126582	0.0357143	0.35	2.72414	0.00934579	0.224	0.632	0.144	0.35443	0.227848	0.642857	0.28866	1.71739	0.168224
PAX6	0.211864	0.737288	0.0508475	0.287356	0.0689655	0.24	0.268817	2.80645	0.0535714	0.173611	0.604167	0.222222	0.287356	0.367816	1.28	0.210084	1.52632	0.285714
PBRM1	0.0651659	0.61019	0.324645	0.106796	0.532039	4.98182	0.0697085	1.56535	0.480702	0.0563525	0.527664	0.415984	0.106796	0.78835	7.38182	0.0597177	1.11714	0.712281
PBRM1_ENST00000296302	0.0722611	0.629371	0.298368	0.114815	0.474074	4.12903	0.0778894	1.69811	0.425249	0.0634596	0.552712	0.383828	0.114815	0.694444	6.04839	0.0677596	1.2357	0.622924
PBRM1_ENST00000356770	0.0734745	0.627646	0.298879	0.117063	0.47619	4.0678	0.0793011	1.68562	0.426288	0.0645514	0.551422	0.384026	0.117063	0.696429	5.94915	0.0690058	1.22927	0.623446
PCDHA11	0.370656	0.600386	0.0289575	0.617363	0.0482315	0.078125	0.588957	1.50242	0.0298211	0.370656	0.600386	0.0289575	0.617363	0.0482315	0.078125	0.588957	1.50242	0.0298211
PCDHA11_ENST00000398640	0.356358	0.615385	0.0282575	0.579082	0.0459184	0.0792952	0.553659	1.6	0.0290792	0.355799	0.61442	0.0297806	0.579082	0.0484694	0.0837004	0.552311	1.5935	0.0306947
PCDHA9	0.389961	0.594595	0.015444	0.655844	0.025974	0.039604	0.639241	1.46667	0.0156863	0.388462	0.592308	0.0192308	0.655844	0.0324675	0.049505	0.63522	1.45283	0.0196078
PCDHA9_ENST00000532602	0.371622	0.611486	0.0168919	0.607735	0.0276243	0.0454545	0.591398	1.57391	0.0171821	0.371622	0.611486	0.0168919	0.607735	0.0276243	0.0454545	0.591398	1.57391	0.0171821
PCDHB18	0.459893	0.518717	0.0213904	0.886598	0.0412371	0.0465116	0.851485	1.07778	0.0218579	0.457447	0.515957	0.0265957	0.886598	0.0515464	0.0581395	0.843137	1.06593	0.0273224
PCDHGA12	0.389034	0.608355	0.00261097	0.639485	0.00429185	0.00671141	0.636752	1.55333	0.0026178	0.389034	0.608355	0.00261097	0.639485	0.00429185	0.00671141	0.636752	1.55333	0.0026178
PCDHGA12_ENST00000252085	0.388021	0.609375	0.00260417	0.636752	0.0042735	0.00671141	0.634043	1.56	0.00261097	0.388021	0.609375	0.00260417	0.636752	0.0042735	0.00671141	0.634043	1.56	0.00261097
PCDHGA3	0.365	0.5975	0.0375	0.610879	0.0627615	0.10274	0.574803	1.48447	0.038961	0.365	0.5975	0.0375	0.610879	0.0627615	0.10274	0.574803	1.48447	0.038961
PCDHGA3_ENST00000253812	0.37156	0.594037	0.0344037	0.625483	0.0579151	0.0925926	0.591241	1.46328	0.0356295	0.370709	0.592677	0.0366133	0.625483	0.0617761	0.0987654	0.589091	1.45506	0.0380048
PCDHGA5	0.360731	0.621005	0.0182648	0.580882	0.0294118	0.0506329	0.564286	1.63855	0.0186047	0.360731	0.621005	0.0182648	0.580882	0.0294118	0.0506329	0.564286	1.63855	0.0186047
PCDHGA5_ENST00000518069	0.360092	0.623853	0.016055	0.577206	0.0257353	0.044586	0.562724	1.65854	0.016317	0.359268	0.622426	0.0183066	0.577206	0.0294118	0.0509554	0.560714	1.64848	0.018648
PCDHGA9	0.362963	0.596296	0.0407407	0.608696	0.068323	0.112245	0.569767	1.47706	0.042471	0.362963	0.596296	0.0407407	0.608696	0.068323	0.112245	0.569767	1.47706	0.042471
PCDHGA9_ENST00000573521	0.362963	0.596296	0.0407407	0.608696	0.068323	0.112245	0.569767	1.47706	0.042471	0.362963	0.596296	0.0407407	0.608696	0.068323	0.112245	0.569767	1.47706	0.042471
PCDHGB1	0.36802	0.609137	0.0228426	0.604167	0.0375	0.062069	0.582329	1.55844	0.0233766	0.36802	0.609137	0.0228426	0.604167	0.0375	0.062069	0.582329	1.55844	0.0233766
PCDHGB1_ENST00000523390	0.370558	0.609137	0.0203046	0.608333	0.0333333	0.0547945	0.58871	1.55844	0.0207254	0.370558	0.609137	0.0203046	0.608333	0.0333333	0.0547945	0.58871	1.55844	0.0207254
PDCD1	0.123288	0.780822	0.0958904	0.157895	0.122807	0.777778	0.140625	3.5625	0.106061	0.111111	0.703704	0.185185	0.157895	0.263158	1.66667	0.125	2.375	0.227273
PDE6B	0.362934	0.610039	0.027027	0.594937	0.0443038	0.0744681	0.569697	1.56436	0.0277778	0.362934	0.610039	0.027027	0.594937	0.0443038	0.0744681	0.569697	1.56436	0.0277778
PDS5A	0.139442	0.820717	0.0398406	0.169903	0.0485437	0.285714	0.162037	4.57778	0.0414938	0.139442	0.820717	0.0398406	0.169903	0.0485437	0.285714	0.162037	4.57778	0.0414938
PDS5B	0.174216	0.710801	0.114983	0.245098	0.161765	0.66	0.21097	2.45783	0.129921	0.159236	0.649682	0.191083	0.245098	0.294118	1.2	0.189394	1.85455	0.23622
PGC	0.370968	0.596774	0.0322581	0.621622	0.0540541	0.0869565	0.589744	1.48	0.0333333	0.370968	0.596774	0.0322581	0.621622	0.0540541	0.0869565	0.589744	1.48	0.0333333
PHACTR2	0.137405	0.832061	0.0305344	0.165138	0.0366972	0.222222	0.159292	4.95455	0.0314961	0.136364	0.825758	0.0378788	0.165138	0.0458716	0.277778	0.157895	4.73913	0.0393701
PHACTR4	0.173228	0.755906	0.0708661	0.229167	0.09375	0.409091	0.209524	3.09677	0.0762712	0.140127	0.611465	0.248408	0.229167	0.40625	1.77273	0.162963	1.57377	0.330508
PHF2	0.333333	0.654321	0.0123457	0.509434	0.0188679	0.037037	0.5	1.89286	0.0125	0.296703	0.582418	0.120879	0.509434	0.207547	0.407407	0.421875	1.39474	0.1375
PHF6	0.0632911	0.626582	0.310127	0.10101	0.494949	4.9	0.0675676	1.67797	0.449541	0.0613497	0.607362	0.331288	0.10101	0.545455	5.4	0.0653595	1.54688	0.495413
PHF6_ENST00000332070	0.0787402	0.637795	0.283465	0.123457	0.444444	3.6	0.0854701	1.76087	0.395604	0.0757576	0.613636	0.310606	0.123457	0.506173	4.1	0.0819672	1.58824	0.450549
PHTF1	0.151724	0.737931	0.110345	0.205607	0.149533	0.727273	0.178862	2.81579	0.124031	0.143791	0.699346	0.156863	0.205607	0.224299	1.09091	0.167939	2.32609	0.186047
PIAS2	0.110294	0.867647	0.0220588	0.127119	0.0254237	0.2	0.123967	6.55556	0.0225564	0.110294	0.867647	0.0220588	0.127119	0.0254237	0.2	0.123967	6.55556	0.0225564
PIAS2_ENST00000324794	0.139344	0.836066	0.0245902	0.166667	0.0294118	0.176471	0.161905	5.1	0.0252101	0.139344	0.836066	0.0245902	0.166667	0.0294118	0.176471	0.161905	5.1	0.0252101
PIGB										0.174757	0.631068	0.194175	0.276923	0.307692	1.11111	0.211765	1.71053	0.240964
PIGG_ENST00000453061	0.362205	0.637795	0	0.567901	0	0	0.567901	1.76087	0	0.362205	0.637795	0	0.567901	0	0	0.567901	1.76087	0
PIGT	0.321429	0.616071	0.0625	0.521739	0.101449	0.194444	0.473684	1.60465	0.0666667	0.305085	0.584746	0.110169	0.521739	0.188406	0.361111	0.439024	1.40816	0.12381
PIK3C2G	0.12202	0.824684	0.0532959	0.147959	0.0646259	0.436782	0.138978	4.704	0.0562963	0.121849	0.823529	0.0546218	0.147959	0.0663265	0.448276	0.138756	4.66667	0.0577778
PIK3C2G_ENST00000433979	0.119488	0.823613	0.056899	0.145078	0.0690846	0.47619	0.135703	4.66935	0.0603318	0.119318	0.822443	0.0582386	0.145078	0.0708117	0.488095	0.135484	4.632	0.0618401
PIK3C2G_ENST00000538779	0.0912698	0.859127	0.0496032	0.106236	0.0577367	0.543478	0.100437	6.09859	0.0521921	0.0912698	0.859127	0.0496032	0.106236	0.0577367	0.543478	0.100437	6.09859	0.0521921
PIK3CA	0.0101045	0.98373	0.00616544	0.0102716	0.00626741	0.610169	0.0102076	60.4632	0.00620369	0.0100889	0.983071	0.00683995	0.0102627	0.00695773	0.677966	0.0101917	58.0707	0.00688705
PIK3CA_ENST00000263967	0.0103749	0.98208	0.00754539	0.0105642	0.00768307	0.727273	0.0104837	54.8026	0.00760276	0.0103749	0.98208	0.00754539	0.0105642	0.00768307	0.727273	0.0104837	54.8026	0.00760276
PIK3CB	0.113314	0.82153	0.0651558	0.137931	0.0793103	0.575	0.127796	4.60317	0.069697	0.113314	0.82153	0.0651558	0.137931	0.0793103	0.575	0.127796	4.60317	0.069697
PIK3R1	0.0573248	0.700637	0.242038	0.0818182	0.345455	4.22222	0.0608108	2.34043	0.319328	0.0561331	0.692308	0.251559	0.0810811	0.363363	4.48148	0.0594714	2.25	0.336111
PIK3R1_ENST00000320694	0.0412979	0.713864	0.244838	0.0578512	0.342975	5.92857	0.0430769	2.49485	0.324219	0.0406977	0.703488	0.255814	0.0578512	0.363636	6.28571	0.0424242	2.37255	0.34375
PIK3R1_ENST00000336483	0.0410557	0.715543	0.243402	0.057377	0.340164	5.92857	0.0428135	2.51546	0.321705	0.0404624	0.705202	0.254335	0.057377	0.360656	6.28571	0.0421687	2.39216	0.341085
PIK3R3	0.0705128	0.826923	0.102564	0.0852713	0.124031	1.45455	0.0758621	4.77778	0.114286	0.0679012	0.796296	0.135802	0.0852713	0.170543	2	0.0728477	3.90909	0.157143
PIK3R3_ENST00000540385	0.0775862	0.775862	0.146552	0.1	0.188889	1.88889	0.0841121	3.46154	0.171717	0.0775862	0.775862	0.146552	0.1	0.188889	1.88889	0.0841121	3.46154	0.171717
PIP5K1C_ENST00000537021	0.181818	0.818182	0	0.222222	0	0	0.222222	4.5	0	0.181818	0.818182	0	0.222222	0	0	0.222222	4.5	0
PITRM1_ENST00000451104	0.157609	0.820652	0.0217391	0.192053	0.0264901	0.137931	0.187097	4.57576	0.0222222	0.157609	0.820652	0.0217391	0.192053	0.0264901	0.137931	0.187097	4.57576	0.0222222
PKD2	0.21547	0.657459	0.127072	0.327731	0.193277	0.589744	0.274648	1.91935	0.14557	0.213115	0.650273	0.136612	0.327731	0.210084	0.641026	0.270833	1.85938	0.158228
PKN2	0.104046	0.82659	0.0693642	0.125874	0.0839161	0.666667	0.116129	4.76667	0.0745342	0.100559	0.798883	0.100559	0.125874	0.125874	1	0.111801	3.97222	0.111801
PLBD2	0.382609	0.556522	0.0608696	0.6875	0.109375	0.159091	0.619718	1.2549	0.0648148	0.382609	0.556522	0.0608696	0.6875	0.109375	0.159091	0.619718	1.2549	0.0648148
PLCG1	0.15	0.822	0.028	0.182482	0.0340633	0.186667	0.176471	4.61798	0.0288066	0.15	0.822	0.028	0.182482	0.0340633	0.186667	0.176471	4.61798	0.0288066
PLEKHA6	0.226667	0.7	0.0733333	0.32381	0.104762	0.323529	0.293103	2.33333	0.0791367	0.195965	0.605187	0.198847	0.32381	0.328571	1.01471	0.243728	1.53285	0.248201
PLEKHS1	0.138889	0.824074	0.037037	0.168539	0.0449438	0.266667	0.16129	4.68421	0.0384615	0.138889	0.824074	0.037037	0.168539	0.0449438	0.266667	0.16129	4.68421	0.0384615
PLK2	0.102222	0.8	0.0977778	0.127778	0.122222	0.956522	0.113861	4	0.108374	0.0966387	0.756303	0.147059	0.127778	0.194444	1.52174	0.106977	3.10345	0.172414
PLUNC	0.39823	0.566372	0.0353982	0.703125	0.0625	0.0888889	0.661765	1.30612	0.0366972	0.391304	0.556522	0.0521739	0.703125	0.09375	0.133333	0.642857	1.2549	0.0550459
PMS1	0.106383	0.787234	0.106383	0.135135	0.135135	1	0.119048	3.7	0.119048	0.105263	0.778947	0.115789	0.135135	0.148649	1.1	0.117647	3.52381	0.130952
PNCK_ENST00000370145	0.415094	0.575472	0.00943396	0.721311	0.0163934	0.0227273	0.709677	1.35556	0.00952381	0.415094	0.575472	0.00943396	0.721311	0.0163934	0.0227273	0.709677	1.35556	0.00952381
PNCK_ENST00000393831	0.415929	0.575221	0.00884956	0.723077	0.0153846	0.0212766	0.712121	1.35417	0.00892857	0.415929	0.575221	0.00884956	0.723077	0.0153846	0.0212766	0.712121	1.35417	0.00892857
PNCK_ENST00000447676	0.389831	0.576271	0.0338983	0.676471	0.0588235	0.0869565	0.638889	1.36	0.0350877	0.389831	0.576271	0.0338983	0.676471	0.0588235	0.0869565	0.638889	1.36	0.0350877
PNISR	0.118012	0.73913	0.142857	0.159664	0.193277	1.21053	0.133803	2.83333	0.166667	0.112426	0.704142	0.183432	0.159664	0.260504	1.63158	0.126667	2.38	0.224638
PNKP	0.383929	0.571429	0.0446429	0.671875	0.078125	0.116279	0.623188	1.33333	0.046729	0.383929	0.571429	0.0446429	0.671875	0.078125	0.116279	0.623188	1.33333	0.046729
PNKP_ENST00000322344	0.387387	0.567568	0.045045	0.68254	0.0793651	0.116279	0.632353	1.3125	0.0471698	0.387387	0.567568	0.045045	0.68254	0.0793651	0.116279	0.632353	1.3125	0.0471698
PNMAL2_ENST00000599531	0.369318	0.602273	0.0284091	0.613208	0.0471698	0.0769231	0.585586	1.51429	0.0292398	0.369318	0.602273	0.0284091	0.613208	0.0471698	0.0769231	0.585586	1.51429	0.0292398
POLE	0.140244	0.820122	0.0396341	0.171004	0.0483271	0.282609	0.163121	4.55932	0.0412698	0.140102	0.819289	0.0406091	0.171004	0.0495663	0.289855	0.162928	4.53371	0.042328
POLG2	0.128713	0.851485	0.019802	0.151163	0.0232558	0.153846	0.147727	5.73333	0.020202	0.128713	0.851485	0.019802	0.151163	0.0232558	0.153846	0.147727	5.73333	0.020202
POLM	0.203704	0.759259	0.037037	0.268293	0.0487805	0.181818	0.255814	3.15385	0.0384615	0.171875	0.640625	0.1875	0.268293	0.292683	1.09091	0.207547	1.78261	0.230769
POT1	0.108209	0.809701	0.0820896	0.133641	0.101382	0.758621	0.121339	4.2549	0.0894309	0.108209	0.809701	0.0820896	0.133641	0.101382	0.758621	0.121339	4.2549	0.0894309
POT1_ENST00000357628	0.111111	0.813492	0.0753968	0.136585	0.0926829	0.678571	0.125	4.3617	0.0815451	0.111111	0.813492	0.0753968	0.136585	0.0926829	0.678571	0.125	4.3617	0.0815451
POTEM	0.164384	0.815068	0.0205479	0.201681	0.0252101	0.125	0.196721	4.40741	0.020979	0.164384	0.815068	0.0205479	0.201681	0.0252101	0.125	0.196721	4.40741	0.020979
POTEM_ENST00000551509	0.140845	0.838028	0.0211268	0.168067	0.0252101	0.15	0.163934	5.17391	0.0215827	0.140845	0.838028	0.0211268	0.168067	0.0252101	0.15	0.163934	5.17391	0.0215827
PPHLN1_ENST00000432191	0.129032	0.830645	0.0403226	0.15534	0.0485437	0.3125	0.148148	4.90476	0.0420168	0.129032	0.830645	0.0403226	0.15534	0.0485437	0.3125	0.148148	4.90476	0.0420168
PPIG	0.151515	0.747475	0.10101	0.202703	0.135135	0.666667	0.178571	2.96	0.11236	0.141509	0.698113	0.160377	0.202703	0.22973	1.13333	0.164835	2.3125	0.191011
PPM1D	0.110132	0.594714	0.295154	0.185185	0.496296	2.68	0.123762	1.46739	0.41875	0.0988142	0.533597	0.367589	0.185185	0.688889	3.72	0.109649	1.14407	0.58125
PPP1R21	0.227586	0.641379	0.131034	0.354839	0.204301	0.575758	0.294643	1.78846	0.150794	0.227586	0.641379	0.131034	0.354839	0.204301	0.575758	0.294643	1.78846	0.150794
PPP2R1A	0.0997732	0.875283	0.0249433	0.11399	0.0284974	0.25	0.110831	7.01818	0.0255814	0.0990991	0.869369	0.0315315	0.11399	0.0362694	0.318182	0.11	6.65517	0.0325581
PPP2R3B	0.490196	0.496732	0.0130719	0.986842	0.0263158	0.0266667	0.961538	0.987013	0.013245	0.441176	0.447059	0.111765	0.986842	0.25	0.253333	0.789474	0.808511	0.125828
PPP2R3B_ENST00000390665	0.486842	0.5	0.0131579	0.973684	0.0263158	0.027027	0.948718	1	0.0133333	0.43787	0.449704	0.112426	0.973684	0.25	0.256757	0.778947	0.817204	0.126667
PPP2R5D	0.347826	0.623188	0.0289855	0.55814	0.0465116	0.0833333	0.533333	1.65385	0.0298507	0.326531	0.585034	0.0884354	0.55814	0.151163	0.270833	0.484848	1.40984	0.0970149
PPP6C	0.0823529	0.794118	0.123529	0.103704	0.155556	1.5	0.0897436	3.85714	0.14094	0.0823529	0.794118	0.123529	0.103704	0.155556	1.5	0.0897436	3.85714	0.14094
PPP6C_ENST00000451402	0.0787879	0.8	0.121212	0.0984848	0.151515	1.53846	0.0855263	4	0.137931	0.0787879	0.8	0.121212	0.0984848	0.151515	1.53846	0.0855263	4	0.137931
PRAM1	0.365591	0.634409	0	0.576271	0	0	0.576271	1.73529	0	0.365591	0.634409	0	0.576271	0	0	0.576271	1.73529	0
PRAMEF2	0.375	0.590909	0.0340909	0.634615	0.0576923	0.0909091	0.6	1.44444	0.0352941	0.375	0.590909	0.0340909	0.634615	0.0576923	0.0909091	0.6	1.44444	0.0352941
PRB3	0.0533333	0.906667	0.04	0.0588235	0.0441176	0.75	0.056338	9.71429	0.0416667	0.0529801	0.900662	0.0463576	0.0588235	0.0514706	0.875	0.0559441	9.06667	0.0486111
PRB3_ENST00000538488	0.0671141	0.885906	0.0469799	0.0757576	0.0530303	0.7	0.0719424	7.76471	0.0492958	0.0671141	0.885906	0.0469799	0.0757576	0.0530303	0.7	0.0719424	7.76471	0.0492958
PREPL	0.11811	0.850394	0.0314961	0.138889	0.037037	0.266667	0.133929	5.68421	0.0325203	0.11811	0.850394	0.0314961	0.138889	0.037037	0.266667	0.133929	5.68421	0.0325203
PRF1	0.383333	0.594444	0.0222222	0.64486	0.0373832	0.057971	0.621622	1.46575	0.0227273	0.372973	0.578378	0.0486486	0.64486	0.0841121	0.130435	0.594828	1.37179	0.0511364
PRKACG	0.409091	0.590909	0	0.692308	0	0	0.692308	1.44444	0	0.402235	0.581006	0.0167598	0.692308	0.0288462	0.0416667	0.672897	1.38667	0.0170455
PRKAR1A	0.166667	0.717391	0.115942	0.232323	0.161616	0.695652	0.2	2.53846	0.131148	0.165468	0.71223	0.122302	0.232323	0.171717	0.73913	0.198276	2.475	0.139344
PRKAR1B	0.372727	0.590909	0.0363636	0.630769	0.0615385	0.097561	0.594203	1.44444	0.0377358	0.344538	0.546218	0.109244	0.630769	0.2	0.317073	0.525641	1.2037	0.122642
PRKCI	0.0987654	0.851852	0.0493827	0.115942	0.057971	0.5	0.109589	5.75	0.0519481	0.0958084	0.826347	0.0778443	0.115942	0.0942029	0.8125	0.10596	4.75862	0.0844156
PRL	0.35	0.59	0.06	0.59322	0.101695	0.171429	0.538462	1.43902	0.0638298	0.35	0.59	0.06	0.59322	0.101695	0.171429	0.538462	1.43902	0.0638298
PRLHR	0.416149	0.571429	0.0124224	0.728261	0.0217391	0.0298507	0.712766	1.33333	0.0125786	0.41358	0.567901	0.0185185	0.728261	0.0326087	0.0447761	0.705263	1.31429	0.0188679
PRMT3										0.284314	0.578431	0.137255	0.491525	0.237288	0.482759	0.39726	1.37209	0.159091
PROM2	0.359184	0.608163	0.0326531	0.590604	0.0536913	0.0909091	0.56051	1.55208	0.0337553	0.359184	0.608163	0.0326531	0.590604	0.0536913	0.0909091	0.56051	1.55208	0.0337553
PRR23C	0.362069	0.62069	0.0172414	0.583333	0.0277778	0.047619	0.567568	1.63636	0.0175439	0.362069	0.62069	0.0172414	0.583333	0.0277778	0.047619	0.567568	1.63636	0.0175439
[truncated: 480 more rows]
