# Supplementary material for: Use of signals of positive and negative selection to distinguish cancer genes and passenger genes
Source: eLife. 2021 Jan 11;10:e59629. doi: 10.7554/eLife.59629 (PMC7877913; doi:10.7554/eLife.59629)
Supplement: Supplementary file 32. — Transcripts of OGs (oncogenes) and TSGs (tumor suppressor genes) of the cancer gene list of Vogelstein et al., 2013 are highlighted by brick red and blue backgrounds, respectively. [file elife-59629-supp32.xlsx]

## Sheet: Supplementary file 32
Gene symbol	rS*s	rM*s	rN*s	rSM*s	rNM*s	rNS*s	rSMN*s	rMSN*s	rNSM*s	PG*1SD	rS*	rM*	rN*	rSM*	rNM*	rNS*	rSMN*	rMSN*	rNSM*	CG*2SD	rS*	rM*	rN*	rSM*	rNM*	rNS*	rSMN*	rMSN*	rNSM*
MLLT3	2.68786	0.486633	0.486482	5.52338	0.999689	0.180992	5.52346	0.204727	0.476719	MLLT3										MLLT3	2.68786	0.486633	0.486482	5.52338	0.999689	0.180992	5.52346	0.204727	0.476719
YTHDF3	2.46538	0.551259	0.458855	4.47227	0.832377	0.18612	4.53132	0.267057	0.443719	YTHDF3										YTHDF3	2.46538	0.551259	0.458855	4.47227	0.832377	0.18612	4.53132	0.267057	0.443719
TBP	2.23114	0.6152	0.135221	3.62668	0.2198	0.0606063	3.8894	0.339523	0.127635	TBP										TBP	2.23114	0.6152	0.135221	3.62668	0.2198	0.0606063	3.8894	0.339523	0.127635
ZBTB26	2.3484	0.653193	0.149672	3.59527	0.229139	0.0637335	3.77853	0.335693	0.143373	ZBTB26										ZBTB26	2.3484	0.653193	0.149672	3.59527	0.229139	0.0637335	3.77853	0.335693	0.143373
HOXD10	2.094	0.636499	0.4944	3.28987	0.776749	0.236103	3.33656	0.344941	0.482433	HOXD10										HOXD10	2.094	0.636499	0.4944	3.28987	0.776749	0.236103	3.33656	0.344941	0.482433
RUNX2	1.94767	0.636702	1.16349	3.059	1.82737	0.597375	2.92321	0.346064	1.17179	RUNX2										RUNX2	1.94767	0.636702	1.16349	3.059	1.82737	0.597375	2.92321	0.346064	1.17179
ZNF92	2.04846	0.747254	0.347065	2.74131	0.464454	0.169428	2.86576	0.450764	0.332293	ZNF92										ZNF92	2.04846	0.747254	0.347065	2.74131	0.464454	0.169428	2.86576	0.450764	0.332293
ZNF384_ENST00000361959	1.82626	0.703126	0.564031	2.59734	0.802178	0.308846	2.63373	0.43235	0.551133	ZNF384_ENST00000361959										ZNF384_ENST00000361959	1.82626	0.703126	0.564031	2.59734	0.802178	0.308846	2.63373	0.43235	0.551133
EXT1	1.79482	0.718293	0.54639	2.49872	0.760678	0.304426	2.53939	0.448051	0.533943	EXT1										EXT1	1.79482	0.718293	0.54639	2.49872	0.760678	0.304426	2.53939	0.448051	0.533943
LCOR	1.84012	0.755363	0.454353	2.43608	0.601503	0.246914	2.50728	0.476391	0.440597	LCOR										LCOR	1.84012	0.755363	0.454353	2.43608	0.601503	0.246914	2.50728	0.476391	0.440597
PPP2R3B	1.76295	0.726848	0.339175	2.42547	0.466638	0.192391	2.49655	0.457244	0.330422	PPP2R3B										PPP2R3B	1.76295	0.726848	0.339175	2.42547	0.466638	0.192391	2.49655	0.457244	0.330422
MATR3	1.8558	0.753674	0.623777	2.46233	0.827648	0.336123	2.48834	0.457631	0.612474	MATR3										MATR3	1.8558	0.753674	0.623777	2.46233	0.827648	0.336123	2.48834	0.457631	0.612474
SOX1	1.78541	0.75949	0	2.3508	0	0	2.44615	0.4736	0	SOX1										SOX1	1.78541	0.75949	0	2.3508	0	0	2.44615	0.4736	0
KRTAP5-4	1.82093	0.787494	0	2.31231	0	0	2.4396	0.505514	0	KRTAP5-4										KRTAP5-4	1.82093	0.787494	0	2.31231	0	0	2.4396	0.505514	0
MSL2	1.80603	0.718298	1.22732	2.51432	1.70864	0.679564	2.4253	0.416475	1.23885	MSL2										MSL2	1.80603	0.718298	1.22732	2.51432	1.70864	0.679564	2.4253	0.416475	1.23885
UBC	1.68727	0.700081	0.749295	2.41011	1.0703	0.444086	2.40098	0.442255	0.741993	UBC										UBC	1.68727	0.700081	0.749295	2.41011	1.0703	0.444086	2.40098	0.442255	0.741993
FOXG1	1.70378	0.739448	0.646091	2.30413	0.873748	0.37921	2.31595	0.461866	0.639241	FOXG1										FOXG1	1.70378	0.739448	0.646091	2.30413	0.873748	0.37921	2.31595	0.461866	0.639241
ENTPD2	1.67856	0.710734	1.03703	2.36172	1.4591	0.617812	2.30864	0.44213	1.03846	ENTPD2										ENTPD2	1.67856	0.710734	1.03703	2.36172	1.4591	0.617812	2.30864	0.44213	1.03846
ZNF730	1.78412	0.852513	0.11734	2.09277	0.13764	0.0657694	2.25267	0.613585	0.110551	ZNF730										ZNF730	1.78412	0.852513	0.11734	2.09277	0.13764	0.0657694	2.25267	0.613585	0.110551
NEUROD6	1.693	0.740095	1.07691	2.28754	1.45509	0.636094	2.22201	0.463945	1.08112	NEUROD6										NEUROD6	1.693	0.740095	1.07691	2.28754	1.45509	0.636094	2.22201	0.463945	1.08112
CDCP2	1.60383	0.77197	0.273272	2.07758	0.353993	0.170387	2.1441	0.526398	0.26648	CDCP2										CDCP2	1.60383	0.77197	0.273272	2.07758	0.353993	0.170387	2.1441	0.526398	0.26648
FOXP2_ENST00000403559	1.68536	0.817347	0.58693	2.06199	0.718092	0.348252	2.12347	0.581352	0.566862	FOXP2_ENST00000403559										FOXP2_ENST00000403559	1.68536	0.817347	0.58693	2.06199	0.718092	0.348252	2.12347	0.581352	0.566862
ZNF319	1.61251	0.788018	0.513955	2.04628	0.652213	0.31873	2.0872	0.536901	0.503465	ZNF319										ZNF319	1.61251	0.788018	0.513955	2.04628	0.652213	0.31873	2.0872	0.536901	0.503465
CRP	1.59756	0.813817	0.179218	1.96304	0.220219	0.112183	2.06836	0.58548	0.172203	CRP										CRP	1.59756	0.813817	0.179218	1.96304	0.220219	0.112183	2.06836	0.58548	0.172203
HNRNPR	1.63184	0.855372	0.218249	1.90775	0.255151	0.133744	2.04527	0.647633	0.206405	HNRNPR										HNRNPR	1.63184	0.855372	0.218249	1.90775	0.255151	0.133744	2.04527	0.647633	0.206405
NTNG2_ENST00000372179	1.57998	0.812057	0.143043	1.94565	0.176149	0.0905352	2.03486	0.577709	0.138309	NTNG2_ENST00000372179										NTNG2_ENST00000372179	1.57998	0.812057	0.143043	1.94565	0.176149	0.0905352	2.03486	0.577709	0.138309
DSPP	1.6992	0.833193	1.17992	2.03938	1.41614	0.694395	2.01728	0.506529	1.1846	DSPP										DSPP	1.6992	0.833193	1.17992	2.03938	1.41614	0.694395	2.01728	0.506529	1.1846
ZNF813	1.6392	0.844962	0.375975	1.93997	0.444961	0.229365	2.01481	0.602068	0.363577	ZNF813										ZNF813	1.6392	0.844962	0.375975	1.93997	0.444961	0.229365	2.01481	0.602068	0.363577
NOVA1	1.56529	0.755306	1.30818	2.07239	1.73199	0.835746	1.99444	0.492486	1.32461	NOVA1										NOVA1	1.56529	0.755306	1.30818	2.07239	1.73199	0.835746	1.99444	0.492486	1.32461
FOXP2	1.61071	0.839328	0.61444	1.91904	0.732061	0.381472	1.97248	0.617262	0.595093	FOXP2										FOXP2	1.61071	0.839328	0.61444	1.91904	0.732061	0.381472	1.97248	0.617262	0.595093
CACNG2	1.52768	0.730617	1.91179	2.09095	2.61668	1.25143	1.93896	0.46565	1.97634	CACNG2										CACNG2	1.52768	0.730617	1.91179	2.09095	2.61668	1.25143	1.93896	0.46565	1.97634
ZNF224	1.59965	0.828304	0.827524	1.93124	0.999059	0.517315	1.93137	0.575124	0.818838	ZNF224										ZNF224	1.59965	0.828304	0.827524	1.93124	0.999059	0.517315	1.93137	0.575124	0.818838
PACSIN2	1.54193	0.767214	1.41948	2.00978	1.85017	0.920582	1.90322	0.503899	1.45068	PACSIN2										PACSIN2	1.54193	0.767214	1.41948	2.00978	1.85017	0.920582	1.90322	0.503899	1.45068
OR5AK2	1.53403	0.8431	0.184478	1.81951	0.218809	0.120257	1.89873	0.620136	0.178525	OR5AK2										OR5AK2	1.53403	0.8431	0.184478	1.81951	0.218809	0.120257	1.89873	0.620136	0.178525
RGR	1.50323	0.801046	0.602799	1.87659	0.752515	0.401002	1.89863	0.567491	0.594693	RGR										RGR	1.50323	0.801046	0.602799	1.87659	0.752515	0.401002	1.89863	0.567491	0.594693
ZNF135	1.54773	0.762273	1.56501	2.03042	2.05308	1.01116	1.89629	0.491595	1.61328	ZNF135										ZNF135	1.54773	0.762273	1.56501	2.03042	2.05308	1.01116	1.89629	0.491595	1.61328
LRRTM2	1.5343	0.806575	0.852781	1.90224	1.05729	0.555813	1.89479	0.566354	0.84614	LRRTM2										LRRTM2	1.5343	0.806575	0.852781	1.90224	1.05729	0.555813	1.89479	0.566354	0.84614
MFAP3L	1.51126	0.825771	0.422054	1.83012	0.511102	0.279272	1.87744	0.597689	0.412806	MFAP3L										MFAP3L	1.51126	0.825771	0.422054	1.83012	0.511102	0.279272	1.87744	0.597689	0.412806
LHFPL3	1.49088	0.788341	1.00736	1.89116	1.27782	0.675682	1.85904	0.55272	1.0077	LHFPL3										LHFPL3	1.49088	0.788341	1.00736	1.89116	1.27782	0.675682	1.85904	0.55272	1.0077
SLC16A3	1.47915	0.737801	2.44624	2.00481	3.31558	1.65381	1.85742	0.475602	2.53663	SLC16A3										SLC16A3	1.47915	0.737801	2.44624	2.00481	3.31558	1.65381	1.85742	0.475602	2.53663
KRTAP27-1	1.54929	0.843268	0.737202	1.83724	0.87422	0.475833	1.85351	0.604253	0.726365	KRTAP27-1										KRTAP27-1	1.54929	0.843268	0.737202	1.83724	0.87422	0.475833	1.85351	0.604253	0.726365
OR4X2	1.47956	0.82684	0.493191	1.78942	0.596476	0.333335	1.82274	0.600236	0.484927	OR4X2										OR4X2	1.47956	0.82684	0.493191	1.78942	0.596476	0.333335	1.82274	0.600236	0.484927
ZNF682	1.54505	0.848893	0.847441	1.82008	0.998291	0.548487	1.82033	0.61181	0.838786	ZNF682										ZNF682	1.54505	0.848893	0.847441	1.82008	0.998291	0.548487	1.82033	0.61181	0.838786
GP5	1.46323	0.795028	1.04114	1.84047	1.30957	0.71154	1.81955	0.556297	1.04229	GP5										GP5	1.46323	0.795028	1.04114	1.84047	1.30957	0.71154	1.81955	0.556297	1.04229
MTNR1A	1.45254	0.794777	0.98879	1.8276	1.24411	0.680733	1.80574	0.565761	0.988392	MTNR1A										MTNR1A	1.45254	0.794777	0.98879	1.8276	1.24411	0.680733	1.80574	0.565761	0.988392
TRIM50	1.47178	0.810448	0.912563	1.81601	1.126	0.620042	1.80517	0.574339	0.909743	TRIM50										TRIM50	1.47178	0.810448	0.912563	1.81601	1.126	0.620042	1.80517	0.574339	0.909743
MESP2	1.4778	0.868654	0.174799	1.70125	0.20123	0.118283	1.80357	0.683056	0.167297	MESP2										MESP2	1.4778	0.868654	0.174799	1.70125	0.20123	0.118283	1.80357	0.683056	0.167297
UPF3A	1.49023	0.83773	0.727757	1.77889	0.868725	0.488351	1.79404	0.611227	0.717946	UPF3A										UPF3A	1.49023	0.83773	0.727757	1.77889	0.868725	0.488351	1.79404	0.611227	0.717946
STEAP3_ENST00000409811	1.45845	0.822263	0.735713	1.7737	0.894742	0.504449	1.7838	0.599145	0.728015	STEAP3_ENST00000409811										STEAP3_ENST00000409811	1.45845	0.822263	0.735713	1.7737	0.894742	0.504449	1.7838	0.599145	0.728015
MMP14	1.46172	0.853736	0.324968	1.71214	0.380642	0.222319	1.78093	0.654514	0.314968	MMP14										MMP14	1.46172	0.853736	0.324968	1.71214	0.380642	0.222319	1.78093	0.654514	0.314968
HOXA11	1.46578	0.76379	1.84461	1.91908	2.41507	1.25845	1.77629	0.50396	1.91427	HOXA11										HOXA11	1.46578	0.76379	1.84461	1.91908	2.41507	1.25845	1.77629	0.50396	1.91427
ZNF629	1.46328	0.83166	0.717955	1.75947	0.863279	0.490646	1.77214	0.606013	0.710047	ZNF629										ZNF629	1.46328	0.83166	0.717955	1.75947	0.863279	0.490646	1.77214	0.606013	0.710047
OR6C65	1.4829	0.845551	0.672211	1.75377	0.794997	0.453308	1.77139	0.612302	0.664016	OR6C65										OR6C65	1.4829	0.845551	0.672211	1.75377	0.794997	0.453308	1.77139	0.612302	0.664016
ENG	1.45241	0.782273	1.63842	1.85665	2.09443	1.12807	1.76977	0.531682	1.67388	ENG										ENG	1.45241	0.782273	1.63842	1.85665	2.09443	1.12807	1.76977	0.531682	1.67388
CYP27A1	1.4484	0.840165	0.518922	1.72394	0.617643	0.358274	1.7678	0.636738	0.507092	CYP27A1										CYP27A1	1.4484	0.840165	0.518922	1.72394	0.617643	0.358274	1.7678	0.636738	0.507092
PNCK_ENST00000370145	1.44547	0.849685	0.265338	1.70118	0.312278	0.183565	1.76161	0.645925	0.258341	PNCK_ENST00000370145										PNCK_ENST00000370145	1.44547	0.849685	0.265338	1.70118	0.312278	0.183565	1.76161	0.645925	0.258341
MAPK13	1.44225	0.858601	0.240245	1.67977	0.27981	0.166576	1.75183	0.664588	0.232723	MAPK13										MAPK13	1.44225	0.858601	0.240245	1.67977	0.27981	0.166576	1.75183	0.664588	0.232723
NTNG2	1.45256	0.851581	0.451463	1.70572	0.530147	0.310806	1.74986	0.641583	0.441623	NTNG2										NTNG2	1.45256	0.851581	0.451463	1.70572	0.530147	0.310806	1.74986	0.641583	0.441623
RBM4	1.44782	0.873186	0.175455	1.65809	0.200937	0.121185	1.74842	0.690574	0.168641	RBM4										RBM4	1.44782	0.873186	0.175455	1.65809	0.200937	0.121185	1.74842	0.690574	0.168641
OPRL1	1.42831	0.841378	0.244504	1.69759	0.2906	0.171184	1.74468	0.632286	0.239534	OPRL1										OPRL1	1.42831	0.841378	0.244504	1.69759	0.2906	0.171184	1.74468	0.632286	0.239534
OR4C3	1.44589	0.829868	0.806748	1.74231	0.972141	0.557961	1.74437	0.600387	0.801843	OR4C3										OR4C3	1.44589	0.829868	0.806748	1.74231	0.972141	0.557961	1.74437	0.600387	0.801843
TBR1	1.44912	0.846523	0.577532	1.71185	0.682241	0.39854	1.74374	0.63483	0.567075	TBR1										TBR1	1.44912	0.846523	0.577532	1.71185	0.682241	0.39854	1.74374	0.63483	0.567075
ZNF30	1.49767	0.874846	0.656636	1.71193	0.750574	0.438437	1.7431	0.658954	0.643555	ZNF30										ZNF30	1.49767	0.874846	0.656636	1.71193	0.750574	0.438437	1.7431	0.658954	0.643555
KCNC1	1.43591	0.851799	0.275096	1.68574	0.322959	0.191583	1.74139	0.648227	0.268322	KCNC1										KCNC1	1.43591	0.851799	0.275096	1.68574	0.322959	0.191583	1.74139	0.648227	0.268322
CRISPLD2	1.44977	0.878225	0.193958	1.6508	0.220852	0.133785	1.7404	0.69698	0.186354	CRISPLD2										CRISPLD2	1.44977	0.878225	0.193958	1.6508	0.220852	0.133785	1.7404	0.69698	0.186354
CHST12	1.4357	0.869117	0	1.6519	0	0	1.73812	0.680558	0	CHST12										CHST12	1.4357	0.869117	0	1.6519	0	0	1.73812	0.680558	0
LMX1B	1.45226	0.836859	0.834979	1.73537	0.997754	0.57495	1.73561	0.613614	0.828632	LMX1B										LMX1B	1.45226	0.836859	0.834979	1.73537	0.997754	0.57495	1.73561	0.613614	0.828632
BTN3A1	1.4514	0.829037	0.965468	1.75071	1.16457	0.665197	1.73353	0.599946	0.963927	BTN3A1										BTN3A1	1.4514	0.829037	0.965468	1.75071	1.16457	0.665197	1.73353	0.599946	0.963927
THBD	1.44536	0.852091	0.440561	1.69625	0.517035	0.304811	1.73353	0.636715	0.432453	THBD										THBD	1.44536	0.852091	0.440561	1.69625	0.517035	0.304811	1.73353	0.636715	0.432453
IRF3	1.43436	0.8381	0.660711	1.71144	0.788344	0.460632	1.73298	0.627974	0.651017	IRF3										IRF3	1.43436	0.8381	0.660711	1.71144	0.788344	0.460632	1.73298	0.627974	0.651017
HAPLN4	1.42644	0.829961	0.721077	1.71869	0.868808	0.505507	1.73104	0.617412	0.713108	HAPLN4										HAPLN4	1.42644	0.829961	0.721077	1.71869	0.868808	0.505507	1.73104	0.617412	0.713108
ZNF33A_ENST00000432900	1.49729	0.842251	1.13839	1.77773	1.35161	0.760302	1.72818	0.595768	1.14932	ZNF33A_ENST00000432900										ZNF33A_ENST00000432900	1.49729	0.842251	1.13839	1.77773	1.35161	0.760302	1.72818	0.595768	1.14932
TSSK6	1.42583	0.812467	1.10573	1.75493	1.36095	0.775501	1.7239	0.584167	1.11004	TSSK6										TSSK6	1.42583	0.812467	1.10573	1.75493	1.36095	0.775501	1.7239	0.584167	1.11004
LIN54	1.46032	0.851241	0.822853	1.71552	0.966651	0.563473	1.71947	0.630727	0.81496	LIN54										LIN54	1.46032	0.851241	0.822853	1.71552	0.966651	0.563473	1.71947	0.630727	0.81496
GJA3	1.42194	0.784274	1.77855	1.81306	2.26777	1.25079	1.71313	0.537729	1.82678	GJA3										GJA3	1.42194	0.784274	1.77855	1.81306	2.26777	1.25079	1.71313	0.537729	1.82678
ZNF517	1.42774	0.877221	0	1.62757	0	0	1.71291	0.693053	0	ZNF517										ZNF517	1.42774	0.877221	0	1.62757	0	0	1.71291	0.693053	0
OR4D1	1.41948	0.789403	1.68618	1.79818	2.13602	1.18788	1.7099	0.545771	1.72576	OR4D1										OR4D1	1.41948	0.789403	1.68618	1.79818	2.13602	1.18788	1.7099	0.545771	1.72576
TMEM130	1.42347	0.836095	0.803748	1.70253	0.961312	0.564638	1.70579	0.617554	0.797976	TMEM130										TMEM130	1.42347	0.836095	0.803748	1.70253	0.961312	0.564638	1.70579	0.617554	0.797976
ZSCAN2	1.4503	0.887409	0.357465	1.63431	0.402819	0.246476	1.6998	0.698884	0.346092	ZSCAN2										ZSCAN2	1.4503	0.887409	0.357465	1.63431	0.402819	0.246476	1.6998	0.698884	0.346092
OR2A2	1.41472	0.838883	0.700704	1.68644	0.835282	0.495293	1.69911	0.624768	0.693784	OR2A2										OR2A2	1.41472	0.838883	0.700704	1.68644	0.835282	0.495293	1.69911	0.624768	0.693784
PRKACG	1.41183	0.882259	0	1.60024	0	0	1.69694	0.712189	0	PRKACG										PRKACG	1.41183	0.882259	0	1.60024	0	0	1.69694	0.712189	0
NCBP1	1.4496	0.857179	0.846077	1.69113	0.987049	0.583661	1.69263	0.638186	0.839017	NCBP1										NCBP1	1.4496	0.857179	0.846077	1.69113	0.987049	0.583661	1.69263	0.638186	0.839017
ADRA1B	1.39893	0.862882	0	1.62123	0	0	1.69021	0.675089	0	ADRA1B										ADRA1B	1.39893	0.862882	0	1.62123	0	0	1.69021	0.675089	0
SLC18A3	1.39989	0.842254	0.546502	1.66207	0.648857	0.39039	1.6859	0.635213	0.539389	SLC18A3										SLC18A3	1.39989	0.842254	0.546502	1.66207	0.648857	0.39039	1.6859	0.635213	0.539389
ZNF83	1.46544	0.914282	0.360878	1.60283	0.394713	0.24626	1.68298	0.748435	0.346353	ZNF83										ZNF83	1.46544	0.914282	0.360878	1.60283	0.394713	0.24626	1.68298	0.748435	0.346353
AP1B1_ENST00000415447	1.39818	0.839483	0.683584	1.66553	0.814292	0.488909	1.67947	0.631405	0.67663	AP1B1_ENST00000415447										AP1B1_ENST00000415447	1.39818	0.839483	0.683584	1.66553	0.814292	0.488909	1.67947	0.631405	0.67663
TMEM79	1.39907	0.844129	0.653807	1.65742	0.774535	0.467315	1.67902	0.644614	0.644451	TMEM79										TMEM79	1.39907	0.844129	0.653807	1.65742	0.774535	0.467315	1.67902	0.644614	0.644451
ANKMY1_ENST00000405523	1.42063	0.782048	2.00012	1.81656	2.55754	1.40791	1.67827	0.52346	2.08416	ANKMY1_ENST00000405523										ANKMY1_ENST00000405523	1.42063	0.782048	2.00012	1.81656	2.55754	1.40791	1.67827	0.52346	2.08416
BTBD7_ENST00000298896	1.44909	0.829538	1.3994	1.74687	1.68697	0.965709	1.67364	0.575923	1.42883	BTBD7_ENST00000298896										BTBD7_ENST00000298896	1.44909	0.829538	1.3994	1.74687	1.68697	0.965709	1.67364	0.575923	1.42883
FUS	1.41641	0.843691	0.889604	1.67882	1.05442	0.628071	1.67193	0.636134	0.88388	FUS										FUS	1.41641	0.843691	0.889604	1.67882	1.05442	0.628071	1.67193	0.636134	0.88388
BCL11A_ENST00000356842	1.41906	0.875981	0.29807	1.61997	0.34027	0.210047	1.67189	0.679203	0.290758	BCL11A_ENST00000356842										BCL11A_ENST00000356842	1.41906	0.875981	0.29807	1.61997	0.34027	0.210047	1.67189	0.679203	0.290758
GFPT2	1.40183	0.86524	0.414633	1.62016	0.479212	0.29578	1.66733	0.674476	0.405037	GFPT2										GFPT2	1.40183	0.86524	0.414633	1.62016	0.479212	0.29578	1.66733	0.674476	0.405037
LMX1B_ENST00000373474	1.41658	0.858781	0.711988	1.64953	0.829069	0.50261	1.66653	0.652383	0.702698	LMX1B_ENST00000373474										LMX1B_ENST00000373474	1.41658	0.858781	0.711988	1.64953	0.829069	0.50261	1.66653	0.652383	0.702698
PRLHR	1.38698	0.854169	0.401071	1.62378	0.469546	0.289168	1.66281	0.659727	0.393538	PRLHR										PRLHR	1.38698	0.854169	0.401071	1.62378	0.469546	0.289168	1.66281	0.659727	0.393538
CALB2	1.40754	0.872929	0.526279	1.61244	0.602889	0.3739	1.66071	0.690987	0.512614	CALB2										CALB2	1.40754	0.872929	0.526279	1.61244	0.602889	0.3739	1.66071	0.690987	0.512614
SLC45A4	1.39832	0.871847	0.294634	1.60386	0.337942	0.210705	1.65712	0.682875	0.287312	SLC45A4										SLC45A4	1.39832	0.871847	0.294634	1.60386	0.337942	0.210705	1.65712	0.682875	0.287312
GPR31	1.37999	0.870612	0	1.58508	0	0	1.65515	0.691932	0	GPR31										GPR31	1.37999	0.870612	0	1.58508	0	0	1.65515	0.691932	0
SLC25A6	1.38624	0.822435	1.11961	1.68553	1.36134	0.807663	1.65446	0.60613	1.12473	SLC25A6										SLC25A6	1.38624	0.822435	1.11961	1.68553	1.36134	0.807663	1.65446	0.60613	1.12473
FAF1	1.43624	0.875571	0.824781	1.64035	0.941992	0.574264	1.64982	0.682262	0.813013	FAF1										FAF1	1.43624	0.875571	0.824781	1.64035	0.941992	0.574264	1.64982	0.682262	0.813013
KCNG4	1.38904	0.814318	1.46028	1.70577	1.79326	1.05129	1.64636	0.583203	1.48318	KCNG4										KCNG4	1.38904	0.814318	1.46028	1.70577	1.79326	1.05129	1.64636	0.583203	1.48318
ITGA11	1.38531	0.853698	0.637261	1.62271	0.746472	0.460015	1.64357	0.654906	0.628854	ITGA11										ITGA11	1.38531	0.853698	0.637261	1.62271	0.746472	0.460015	1.64357	0.654906	0.628854
ZNF443	1.44754	0.900328	0.608558	1.60779	0.675929	0.420408	1.64283	0.702864	0.595765	ZNF443										ZNF443	1.44754	0.900328	0.608558	1.60779	0.675929	0.420408	1.64283	0.702864	0.595765
MAML2	1.41202	0.880559	0.66601	1.60355	0.756349	0.471672	1.63959	0.701955	0.650293	MAML2										MAML2	1.41202	0.880559	0.66601	1.60355	0.756349	0.471672	1.63959	0.701955	0.650293
ZFP14	1.44623	0.934811	0.330914	1.54709	0.353991	0.228811	1.63816	0.798369	0.315474	ZFP14										ZFP14	1.44623	0.934811	0.330914	1.54709	0.353991	0.228811	1.63816	0.798369	0.315474
HOXD3	1.38107	0.85853	0.631851	1.60865	0.735969	0.457508	1.63374	0.667002	0.621968	HOXD3										HOXD3	1.38107	0.85853	0.631851	1.60865	0.735969	0.457508	1.63374	0.667002	0.621968
NGFR	1.39552	0.865712	0.647486	1.61199	0.747924	0.463975	1.63187	0.661697	0.639224	NGFR										NGFR	1.39552	0.865712	0.647486	1.61199	0.747924	0.463975	1.63187	0.661697	0.639224
ZNRF4	1.3835	0.853891	0.726903	1.62023	0.851283	0.52541	1.63183	0.650382	0.719936	ZNRF4										ZNRF4	1.3835	0.853891	0.726903	1.62023	0.851283	0.52541	1.63183	0.650382	0.719936
ZNF681	1.43704	0.908388	0.568299	1.58196	0.625613	0.395466	1.63153	0.733842	0.55207	ZNF681										ZNF681	1.43704	0.908388	0.568299	1.58196	0.625613	0.395466	1.63153	0.733842	0.55207
CETP	1.37787	0.815781	1.40858	1.68902	1.72666	1.02229	1.62979	0.590625	1.43008	CETP										CETP	1.37787	0.815781	1.40858	1.68902	1.72666	1.02229	1.62979	0.590625	1.43008
GRPR	1.37418	0.858766	0.482776	1.60018	0.562174	0.35132	1.6295	0.663393	0.47544	GRPR										GRPR	1.37418	0.858766	0.482776	1.60018	0.562174	0.35132	1.6295	0.663393	0.47544
TBC1D24	1.37779	0.833718	1.06692	1.65258	1.27971	0.77437	1.62823	0.621389	1.06974	TBC1D24										TBC1D24	1.37779	0.833718	1.06692	1.65258	1.27971	0.77437	1.62823	0.621389	1.06974
ZNF519	1.43369	0.916889	0.526526	1.56365	0.574253	0.367253	1.62688	0.759734	0.507959	ZNF519										ZNF519	1.43369	0.916889	0.526526	1.56365	0.574253	0.367253	1.62688	0.759734	0.507959
DAGLB	1.38559	0.865485	0.619567	1.60094	0.715861	0.44715	1.62611	0.670739	0.610056	DAGLB										DAGLB	1.38559	0.865485	0.619567	1.60094	0.715861	0.44715	1.62611	0.670739	0.610056
EEF1D	1.38372	0.887082	0.209909	1.55985	0.236629	0.1517	1.62607	0.714248	0.203486	EEF1D										EEF1D	1.38372	0.887082	0.209909	1.55985	0.236629	0.1517	1.62607	0.714248	0.203486
SNX8	1.37235	0.845071	0.916123	1.62395	1.08408	0.667558	1.61732	0.6385	0.913373	SNX8										SNX8	1.37235	0.845071	0.916123	1.62395	1.08408	0.667558	1.61732	0.6385	0.913373
KCNN2	1.38593	0.834725	1.28903	1.66035	1.54426	0.930084	1.61533	0.607472	1.30368	KCNN2										KCNN2	1.38593	0.834725	1.28903	1.66035	1.54426	0.930084	1.61533	0.607472	1.30368
NCK2	1.38125	0.866807	0.666942	1.59349	0.769423	0.482854	1.6152	0.673907	0.657288	NCK2										NCK2	1.38125	0.866807	0.666942	1.59349	0.769423	0.482854	1.6152	0.673907	0.657288
OR1G1	1.37129	0.890251	0	1.54034	0	0	1.61495	0.723015	0	OR1G1										OR1G1	1.37129	0.890251	0	1.54034	0	0	1.61495	0.723015	0
FOXI1	1.37777	0.859134	0.729957	1.60368	0.849643	0.529809	1.61481	0.65612	0.723289	FOXI1										FOXI1	1.37777	0.859134	0.729957	1.60368	0.849643	0.529809	1.61481	0.65612	0.723289
NPEPPS	1.39801	0.835491	1.3104	1.67328	1.56842	0.937331	1.61441	0.603682	1.33123	NPEPPS										NPEPPS	1.39801	0.835491	1.3104	1.67328	1.56842	0.937331	1.61441	0.603682	1.33123
PRF1	1.37808	0.867628	0.605565	1.58833	0.697954	0.439428	1.6131	0.673603	0.5966	PRF1										PRF1	1.37808	0.867628	0.605565	1.58833	0.697954	0.439428	1.6131	0.673603	0.5966
SLC6A20	1.36482	0.848246	0.815245	1.60899	0.961095	0.597328	1.6129	0.655478	0.808402	SLC6A20										SLC6A20	1.36482	0.848246	0.815245	1.60899	0.961095	0.597328	1.6129	0.655478	0.808402
SLC2A8	1.36796	0.859785	0.607513	1.59105	0.706587	0.444102	1.61138	0.663483	0.600107	SLC2A8										SLC2A8	1.36796	0.859785	0.607513	1.59105	0.706587	0.444102	1.61138	0.663483	0.600107
BCL11A	1.38694	0.890426	0.285036	1.55761	0.320112	0.205515	1.6089	0.707322	0.277922	BCL11A										BCL11A	1.38694	0.890426	0.285036	1.55761	0.320112	0.205515	1.6089	0.707322	0.277922
PCDHGA12	1.37181	0.895261	0.0707959	1.5323	0.0790786	0.0516077	1.60856	0.732566	0.0683635	PCDHGA12										PCDHGA12	1.37181	0.895261	0.0707959	1.5323	0.0790786	0.0516077	1.60856	0.732566	0.0683635
BARHL2	1.383	0.879377	0.448258	1.57271	0.509745	0.32412	1.6083	0.686844	0.439961	BARHL2										BARHL2	1.383	0.879377	0.448258	1.57271	0.509745	0.32412	1.6083	0.686844	0.439961
OR10H2	1.35951	0.833759	1.1797	1.63058	1.41491	0.867738	1.60667	0.619618	1.18518	OR10H2										OR10H2	1.35951	0.833759	1.1797	1.63058	1.41491	0.867738	1.60667	0.619618	1.18518
WDR20_ENST00000454394	1.38882	0.820797	1.68106	1.69204	2.04809	1.21042	1.60545	0.575368	1.7278	WDR20_ENST00000454394										WDR20_ENST00000454394	1.38882	0.820797	1.68106	1.69204	2.04809	1.21042	1.60545	0.575368	1.7278
NPTX2	1.36814	0.878256	0.354846	1.55779	0.404035	0.259365	1.60374	0.697485	0.346881	NPTX2										NPTX2	1.36814	0.878256	0.354846	1.55779	0.404035	0.259365	1.60374	0.697485	0.346881
DENND1A_ENST00000373620	1.3786	0.84808	1.05859	1.62555	1.24822	0.767876	1.60371	0.634152	1.06118	DENND1A_ENST00000373620										DENND1A_ENST00000373620	1.3786	0.84808	1.05859	1.62555	1.24822	0.767876	1.60371	0.634152	1.06118
CX3CR1	1.36891	0.855738	0.811253	1.59968	0.948015	0.592627	1.60367	0.653771	0.80586	CX3CR1										CX3CR1	1.36891	0.855738	0.811253	1.59968	0.948015	0.592627	1.60367	0.653771	0.80586
ANKS3	1.37681	0.8172	1.6271	1.68478	1.99107	1.18179	1.59846	0.57995	1.67056	ANKS3										ANKS3	1.37681	0.8172	1.6271	1.68478	1.99107	1.18179	1.59846	0.57995	1.67056
SLCO4A1	1.36256	0.883441	0.273046	1.54233	0.309071	0.200392	1.5975	0.710709	0.265919	SLCO4A1										SLCO4A1	1.36256	0.883441	0.273046	1.54233	0.309071	0.200392	1.5975	0.710709	0.265919
RPN2	1.36797	0.795414	2.06352	1.71982	2.59427	1.50846	1.59728	0.550713	2.14533	RPN2										RPN2	1.36797	0.795414	2.06352	1.71982	2.59427	1.50846	1.59728	0.550713	2.14533
HOXB3	1.36706	0.863895	0.712266	1.58244	0.824482	0.52102	1.59648	0.668245	0.704694	HOXB3										HOXB3	1.36706	0.863895	0.712266	1.58244	0.824482	0.52102	1.59648	0.668245	0.704694
FOXD4	1.36275	0.862966	0.690625	1.57915	0.800292	0.506788	1.59491	0.669505	0.682891	FOXD4										FOXD4	1.36275	0.862966	0.690625	1.57915	0.800292	0.506788	1.59491	0.669505	0.682891
OR1C1	1.36443	0.853915	0.960045	1.59786	1.12429	0.703622	1.59073	0.641913	0.959026	OR1C1										OR1C1	1.36443	0.853915	0.960045	1.59786	1.12429	0.703622	1.59073	0.641913	0.959026
GJB4	1.3512	0.881111	0.25472	1.53352	0.28909	0.188514	1.59066	0.713116	0.247945	GJB4										GJB4	1.3512	0.881111	0.25472	1.53352	0.28909	0.188514	1.59066	0.713116	0.247945
GCK_ENST00000395796	1.36893	0.880662	0.487759	1.55443	0.553855	0.356307	1.58767	0.693131	0.479077	GCK_ENST00000395796										GCK_ENST00000395796	1.36893	0.880662	0.487759	1.55443	0.553855	0.356307	1.58767	0.693131	0.479077
GTF3C3	1.3939	0.873782	0.942749	1.59525	1.07893	0.676338	1.58634	0.667398	0.939655	GTF3C3										GTF3C3	1.3939	0.873782	0.942749	1.59525	1.07893	0.676338	1.58634	0.667398	0.939655
SARDH_ENST00000371868	1.3539	0.866581	0.572428	1.56235	0.660559	0.422799	1.58631	0.678055	0.564583	SARDH_ENST00000371868										SARDH_ENST00000371868	1.3539	0.866581	0.572428	1.56235	0.660559	0.422799	1.58631	0.678055	0.564583
ZNF33A	1.41029	0.862882	1.19114	1.63439	1.38042	0.84461	1.58474	0.635024	1.20717	ZNF33A										ZNF33A	1.41029	0.862882	1.19114	1.63439	1.38042	0.84461	1.58474	0.635024	1.20717
EGR4	1.35388	0.846297	1.07236	1.59977	1.26712	0.792065	1.58444	0.635792	1.07441	EGR4										EGR4	1.35388	0.846297	1.07236	1.59977	1.26712	0.792065	1.58444	0.635792	1.07441
CACNB1	1.35765	0.827414	1.38235	1.64083	1.67069	1.0182	1.58184	0.608086	1.40463	CACNB1										CACNB1	1.35765	0.827414	1.38235	1.64083	1.67069	1.0182	1.58184	0.608086	1.40463
ZNF503	1.35001	0.872245	0.360429	1.54774	0.41322	0.266982	1.58156	0.686418	0.354451	ZNF503										ZNF503	1.35001	0.872245	0.360429	1.54774	0.41322	0.266982	1.58156	0.686418	0.354451
IL12RB1	1.36623	0.805781	1.70211	1.69554	2.11237	1.24584	1.58074	0.568835	1.76406	IL12RB1										IL12RB1	1.36623	0.805781	1.70211	1.69554	2.11237	1.24584	1.58074	0.568835	1.76406
PCDHA9	1.35192	0.877727	0.452586	1.54025	0.515634	0.334773	1.57688	0.698393	0.443999	PCDHA9										PCDHA9	1.35192	0.877727	0.452586	1.54025	0.515634	0.334773	1.57688	0.698393	0.443999
CCDC116	1.36101	0.895756	0.190659	1.51939	0.212847	0.140087	1.57615	0.725491	0.185504	CCDC116										CCDC116	1.36101	0.895756	0.190659	1.51939	0.212847	0.140087	1.57615	0.725491	0.185504
AMIGO3	1.34857	0.863825	0.687342	1.56116	0.795696	0.509683	1.57368	0.668991	0.68129	AMIGO3										AMIGO3	1.34857	0.863825	0.687342	1.56116	0.795696	0.509683	1.57368	0.668991	0.68129
ITPRIP	1.35414	0.894219	0.194476	1.51432	0.217481	0.143616	1.57355	0.728253	0.189033	ITPRIP										ITPRIP	1.35414	0.894219	0.194476	1.51432	0.217481	0.143616	1.57355	0.728253	0.189033
TRIB2	1.35179	0.895324	0.248899	1.50984	0.277998	0.184125	1.57308	0.735694	0.241388	TRIB2										TRIB2	1.35179	0.895324	0.248899	1.50984	0.277998	0.184125	1.57308	0.735694	0.241388
TFAP2D	1.36607	0.877565	0.72268	1.55666	0.823506	0.529022	1.57298	0.687953	0.713734	TFAP2D										TFAP2D	1.36607	0.877565	0.72268	1.55666	0.823506	0.529022	1.57298	0.687953	0.713734
ADAM28_ENST00000437154	1.38841	0.884847	0.854912	1.5691	0.966169	0.615747	1.57208	0.678248	0.849362	ADAM28_ENST00000437154										ADAM28_ENST00000437154	1.38841	0.884847	0.854912	1.5691	0.966169	0.615747	1.57208	0.678248	0.849362
VSIG1	1.36577	0.887051	0.592054	1.53968	0.667441	0.433495	1.5712	0.707358	0.581029	VSIG1										VSIG1	1.36577	0.887051	0.592054	1.53968	0.667441	0.433495	1.5712	0.707358	0.581029
RASSF6	1.38814	0.89785	0.69951	1.54608	0.779094	0.503917	1.57113	0.715636	0.687369	RASSF6										RASSF6	1.38814	0.89785	0.69951	1.54608	0.779094	0.503917	1.57113	0.715636	0.687369
FUT1	1.35413	0.879183	0.556788	1.54021	0.633301	0.411178	1.56808	0.694987	0.547982	FUT1										FUT1	1.35413	0.879183	0.556788	1.54021	0.633301	0.411178	1.56808	0.694987	0.547982
DENND1A_ENST00000373618	1.3556	0.84365	1.23949	1.60683	1.4692	0.914346	1.56674	0.629124	1.25183	DENND1A_ENST00000373618										DENND1A_ENST00000373618	1.3556	0.84365	1.23949	1.60683	1.4692	0.914346	1.56674	0.629124	1.25183
DMRT3	1.35203	0.860994	0.901679	1.57031	1.04725	0.666908	1.56645	0.662958	0.898229	DMRT3										DMRT3	1.35203	0.860994	0.901679	1.57031	1.04725	0.666908	1.56645	0.662958	0.898229
CHST4	1.35852	0.89229	0.515258	1.52251	0.577456	0.379279	1.56536	0.723993	0.503139	CHST4										CHST4	1.35852	0.89229	0.515258	1.52251	0.577456	0.379279	1.56536	0.723993	0.503139
TBXA2R	1.34129	0.842347	1.20716	1.59233	1.43309	0.899995	1.56334	0.633925	1.215	TBXA2R										TBXA2R	1.34129	0.842347	1.20716	1.59233	1.43309	0.899995	1.56334	0.633925	1.215
GAA	1.34551	0.880405	0.48608	1.52829	0.552109	0.361261	1.56296	0.703558	0.477103	GAA										GAA	1.34551	0.880405	0.48608	1.52829	0.552109	0.361261	1.56296	0.703558	0.477103
GJA8	1.3439	0.892377	0.437707	1.50597	0.490496	0.3257	1.56218	0.737668	0.425072	GJA8										GJA8	1.3439	0.892377	0.437707	1.50597	0.490496	0.3257	1.56218	0.737668	0.425072
KCNJ11	1.34228	0.866245	0.682989	1.54953	0.788448	0.508829	1.56194	0.673043	0.677119	KCNJ11										KCNJ11	1.34228	0.866245	0.682989	1.54953	0.788448	0.508829	1.56194	0.673043	0.677119
MSN	1.35437	0.847484	1.13241	1.5981	1.3362	0.836115	1.56188	0.642095	1.14038	MSN										MSN	1.35437	0.847484	1.13241	1.5981	1.3362	0.836115	1.56188	0.642095	1.14038
GSDMB	1.35927	0.810341	1.90262	1.67741	2.34793	1.39974	1.56068	0.565892	1.97863	GSDMB										GSDMB	1.35927	0.810341	1.90262	1.67741	2.34793	1.39974	1.56068	0.565892	1.97863
OTX1	1.35359	0.881362	0.62682	1.53579	0.711194	0.463081	1.55947	0.697353	0.617643	OTX1										OTX1	1.35359	0.881362	0.62682	1.53579	0.711194	0.463081	1.55947	0.697353	0.617643
OR2T34	1.34393	0.863662	0.827839	1.55609	0.958522	0.615982	1.55889	0.667677	0.823309	OR2T34										OR2T34	1.34393	0.863662	0.827839	1.55609	0.958522	0.615982	1.55889	0.667677	0.823309
DHCR7	1.33644	0.897173	0.311268	1.48962	0.346943	0.232908	1.558	0.750278	0.300989	DHCR7										DHCR7	1.33644	0.897173	0.311268	1.48962	0.346943	0.232908	1.558	0.750278	0.300989
OR6M1	1.33642	0.846823	1.08825	1.57815	1.2851	0.814309	1.55654	0.646109	1.09168	OR6M1										OR6M1	1.33642	0.846823	1.08825	1.57815	1.2851	0.814309	1.55654	0.646109	1.09168
SLC47A1	1.33873	0.817748	1.63676	1.63709	2.00154	1.22262	1.55619	0.596009	1.67751	SLC47A1										SLC47A1	1.33873	0.817748	1.63676	1.63709	2.00154	1.22262	1.55619	0.596009	1.67751
KLHL14_ENST00000358095	1.34252	0.850092	1.07316	1.57927	1.2624	0.79936	1.55609	0.649369	1.07648	KLHL14_ENST00000358095										KLHL14_ENST00000358095	1.34252	0.850092	1.07316	1.57927	1.2624	0.79936	1.55609	0.649369	1.07648
PRR5	1.34392	0.852358	1.11745	1.57671	1.31101	0.831488	1.55438	0.645658	1.12197	PRR5										PRR5	1.34392	0.852358	1.11745	1.57671	1.31101	0.831488	1.55438	0.645658	1.12197
TGIF2LX	1.35593	0.851347	1.17095	1.59269	1.3754	0.863574	1.55417	0.641483	1.18126	TGIF2LX										TGIF2LX	1.35593	0.851347	1.17095	1.59269	1.3754	0.863574	1.55417	0.641483	1.18126
OR1F1	1.33862	0.882404	0.298896	1.51701	0.338729	0.223287	1.55227	0.701654	0.293741	OR1F1										OR1F1	1.33862	0.882404	0.298896	1.51701	0.338729	0.223287	1.55227	0.701654	0.293741
SIAH3	1.35643	0.883867	0.655584	1.53466	0.741723	0.483314	1.55038	0.687333	0.648897	SIAH3										SIAH3	1.35643	0.883867	0.655584	1.53466	0.741723	0.483314	1.55038	0.687333	0.648897
FZD2	1.33754	0.872922	0.685654	1.53226	0.785469	0.512623	1.54955	0.690935	0.677468	FZD2										FZD2	1.33754	0.872922	0.685654	1.53226	0.785469	0.512623	1.54955	0.690935	0.677468
SYT7	1.33702	0.866855	0.785584	1.54238	0.906247	0.587564	1.54896	0.676355	0.780015	SYT7										SYT7	1.33702	0.866855	0.785584	1.54238	0.906247	0.587564	1.54896	0.676355	0.780015
TBX19	1.34429	0.78276	2.47687	1.71738	3.16427	1.84251	1.54755	0.529906	2.62455	TBX19										TBX19	1.34429	0.78276	2.47687	1.71738	3.16427	1.84251	1.54755	0.529906	2.62455
SLC26A6_ENST00000383733	1.33227	0.863506	0.83685	1.54286	0.96913	0.62814	1.54507	0.673309	0.832254	SLC26A6_ENST00000383733										SLC26A6_ENST00000383733	1.33227	0.863506	0.83685	1.54286	0.96913	0.62814	1.54507	0.673309	0.832254
STC2	1.34423	0.833186	1.55775	1.61336	1.86963	1.15884	1.54444	0.60824	1.59213	STC2										STC2	1.34423	0.833186	1.55775	1.61336	1.86963	1.15884	1.54444	0.60824	1.59213
PLBD2	1.33594	0.828991	1.43971	1.61152	1.73671	1.07768	1.54413	0.614392	1.46821	PLBD2										PLBD2	1.33594	0.828991	1.43971	1.61152	1.73671	1.07768	1.54413	0.614392	1.46821
OTX2	1.34954	0.845815	1.24221	1.59555	1.46865	0.920469	1.54251	0.63534	1.25963	OTX2										OTX2	1.34954	0.845815	1.24221	1.59555	1.46865	0.920469	1.54251	0.63534	1.25963
CCNJL	1.33914	0.835592	1.45353	1.60262	1.73952	1.08543	1.5416	0.617573	1.48047	CCNJL										CCNJL	1.33914	0.835592	1.45353	1.60262	1.73952	1.08543	1.5416	0.617573	1.48047
IRF2BPL	1.33839	0.914223	0	1.46396	0	0	1.54068	0.770742	0	IRF2BPL										IRF2BPL	1.33839	0.914223	0	1.46396	0	0	1.54068	0.770742	0
SERPINA5	1.33909	0.864103	0.981238	1.54969	1.13556	0.732765	1.54053	0.663393	0.980637	SERPINA5										SERPINA5	1.33909	0.864103	0.981238	1.54969	1.13556	0.732765	1.54053	0.663393	0.980637
ADAMTS12_ENST00000515401	1.35026	0.921041	0.202351	1.46601	0.219698	0.149861	1.54039	0.781343	0.194896	ADAMTS12_ENST00000515401										ADAMTS12_ENST00000515401	1.35026	0.921041	0.202351	1.46601	0.219698	0.149861	1.54039	0.781343	0.194896
DLL1	1.34507	0.874708	0.848887	1.53773	0.970481	0.631112	1.5401	0.681612	0.843826	DLL1										DLL1	1.34507	0.874708	0.848887	1.53773	0.970481	0.631112	1.5401	0.681612	0.843826
NXN	1.33414	0.867631	0.845291	1.53768	0.974252	0.633584	1.53977	0.67926	0.840219	NXN										NXN	1.33414	0.867631	0.845291	1.53768	0.974252	0.633584	1.53977	0.67926	0.840219
TSC22D2	1.34516	0.870351	0.933158	1.54554	1.07216	0.693716	1.53956	0.673475	0.930606	TSC22D2										TSC22D2	1.34516	0.870351	0.933158	1.54554	1.07216	0.693716	1.53956	0.673475	0.930606
LRRC8A	1.32032	0.85877	0.838713	1.53745	0.976645	0.635237	1.53933	0.676485	0.833647	LRRC8A										LRRC8A	1.32032	0.85877	0.838713	1.53745	0.976645	0.635237	1.53933	0.676485	0.833647
HKR1_ENST00000392153	1.3578	0.84051	1.38679	1.61545	1.64994	1.02135	1.53909	0.616545	1.42027	HKR1_ENST00000392153										HKR1_ENST00000392153	1.3578	0.84051	1.38679	1.61545	1.64994	1.02135	1.53909	0.616545	1.42027
OR8B12	1.33194	0.884747	0.302498	1.50545	0.341903	0.227111	1.53442	0.700715	0.298138	OR8B12										OR8B12				1.50545	0.341903	0.227111	1.53442	0.700715	0.298138
CNTNAP3B	1.34564	0.933746	0	1.44112	0	0	1.53417	0.812279	0	CNTNAP3B										CNTNAP3B	1.34564	0.933746	0				1.53417	0.812279	0
OR10G8	1.3263	0.878551	0.528309	1.50964	0.601342	0.398334	1.53347	0.698572	0.521338	OR10G8										OR10G8				1.50964	0.601342	0.398334	1.53347	0.698572	0.521338
HS3ST3A1	1.32838	0.895473	0.279689	1.48344	0.312337	0.21055	1.53009	0.731555	0.273258	HS3ST3A1										HS3ST3A1				1.48344	0.312337	0.21055	1.53009	0.731555	0.273258
ZNF564	1.38002	0.892314	1.05177	1.54656	1.1787	0.762143	1.52872	0.679445	1.05477	ZNF564										ZNF564	1.38002	0.892314	1.05177	1.54656	1.1787	0.762143	1.52872	0.679445	1.05477
ZDHHC11_ENST00000424784	1.36287	0.911895	0.672452	1.49455	0.737422	0.493409	1.52823	0.752877	0.657563	ZDHHC11_ENST00000424784										ZDHHC11_ENST00000424784	1.36287	0.911895	0.672452	1.49455	0.737422	0.493409	1.52823	0.752877	0.657563
KRT85	1.32775	0.883191	0.62111	1.50336	0.703256	0.467791	1.52752	0.709695	0.611924	KRT85										KRT85				1.50336	0.703256	0.467791	1.52752	0.709695	0.611924
IL12RB1_ENST00000593993	1.33622	0.836765	1.42882	1.59689	1.70755	1.0693	1.52638	0.619782	1.46014	IL12RB1_ENST00000593993										IL12RB1_ENST00000593993	1.33622	0.836765	1.42882	1.59689	1.70755	1.0693	1.52638	0.619782	1.46014
CBX6	1.32153	0.898878	0	1.4702	0	0	1.52613	0.739972	0	CBX6										CBX6				1.4702	0	0	1.52613	0.739972	0
PNKP	1.32348	0.845926	1.29761	1.56454	1.53396	0.980454	1.52507	0.640494	1.31152	PNKP										PNKP	1.32348	0.845926	1.29761	1.56454	1.53396	0.980454	1.52507	0.640494	1.31152
TBX10	1.32156	0.851899	1.21145	1.55131	1.42206	0.916686	1.52253	0.649943	1.21991	TBX10										TBX10	1.32156	0.851899	1.21145	1.55131	1.42206	0.916686	1.52253	0.649943	1.21991
EPC2	1.35614	0.915881	0.542126	1.48069	0.591918	0.399758	1.52253	0.75714	0.528969	EPC2										EPC2	1.35614	0.915881	0.542126	1.48069	0.591918	0.399758	1.52253	0.75714	0.528969
EHD3	1.3185	0.861674	0.964816	1.53016	1.1197	0.731751	1.52192	0.671054	0.963699	EHD3										EHD3	1.3185	0.861674	0.964816	1.53016	1.1197	0.731751	1.52192	0.671054	0.963699
TDRD12	1.35827	0.893296	0.898027	1.52052	1.0053	0.661154	1.51993	0.704703	0.892612	TDRD12										TDRD12	1.35827	0.893296	0.898027	1.52052	1.0053	0.661154	1.51993	0.704703	0.892612
SOX11	1.33818	0.880933	0.872542	1.51905	0.990475	0.652037	1.51964	0.683047	0.869079	SOX11										SOX11	1.33818	0.880933	0.872542	1.51905	0.990475	0.652037	1.51964	0.683047	0.869079
MYADM	1.31297	0.904197	0	1.45208	0	0	1.51907	0.758719	0	MYADM										MYADM							1.51907	0.758719	0
HSPD1	1.35043	0.848389	1.64514	1.59176	1.93914	1.21824	1.51903	0.609787	1.68903	HSPD1										HSPD1	1.35043	0.848389	1.64514	1.59176	1.93914	1.21824	1.51903	0.609787	1.68903
KCNQ1_ENST00000335475	1.31956	0.860502	1.02747	1.53348	1.19404	0.778647	1.51882	0.668092	1.02851	KCNQ1_ENST00000335475										KCNQ1_ENST00000335475	1.31956	0.860502	1.02747	1.53348	1.19404	0.778647	1.51882	0.668092	1.02851
ZNF71	1.32963	0.864732	1.06153	1.53762	1.22759	0.798368	1.51861	0.667466	1.06425	ZNF71										ZNF71	1.32963	0.864732	1.06153	1.53762	1.22759	0.798368	1.51861	0.667466	1.06425
CHRM4	1.31421	0.855433	1.08668	1.53631	1.27033	0.826868	1.51774	0.661901	1.08978	CHRM4										CHRM4	1.31421	0.855433	1.08668	1.53631	1.27033	0.826868	1.51774	0.661901	1.08978
TBX5_ENST00000526441	1.33796	0.896663	0.650443	1.49216	0.725404	0.486144	1.5176	0.725511	0.63985	TBX5_ENST00000526441										TBX5_ENST00000526441	1.33796	0.896663	0.650443	1.49216	0.725404	0.486144	1.5176	0.725511	0.63985
LHFPL5	1.31655	0.885001	0.541832	1.48763	0.612239	0.411553	1.51754	0.717978	0.532759	LHFPL5										LHFPL5				1.48763	0.612239	0.411553	1.51754	0.717978	0.532759
HSPA2	1.31692	0.89995	0.169136	1.46333	0.187939	0.128433	1.51737	0.745206	0.164763	HSPA2										HSPA2				1.46333	0.187939	0.128433	1.51737	0.745206	0.164763
ZNF880	1.3496	0.861849	1.27694	1.56593	1.48163	0.946166	1.51305	0.645202	1.29805	ZNF880										ZNF880	1.3496	0.861849	1.27694	1.56593	1.48163	0.946166	1.51305	0.645202	1.29805
MRGPRX1	1.31394	0.880259	0.653603	1.49267	0.742512	0.497438	1.51297	0.709368	0.645085	MRGPRX1										MRGPRX1				1.49267	0.742512	0.497438	1.51297	0.709368	0.645085
PCDHGB1	1.32347	0.887428	0.643084	1.49136	0.72466	0.485907	1.51184	0.711991	0.63474	PCDHGB1										PCDHGB1				1.49136	0.72466	0.485907	1.51184	0.711991	0.63474
SLC6A18	1.31329	0.905675	0.232014	1.45007	0.256178	0.176666	1.51022	0.761043	0.225217	SLC6A18										SLC6A18							1.51022	0.761043	0.225217
SLC24A3	1.32293	0.896435	0.46712	1.47576	0.521086	0.353096	1.50946	0.728809	0.458594	SLC24A3										SLC24A3				1.47576	0.521086	0.353096	1.50946	0.728809	0.458594
KCNN4	1.3163	0.86639	0.983169	1.5193	1.13479	0.746917	1.50884	0.677592	0.98254	KCNN4										KCNN4	1.3163	0.86639	0.983169	1.5193	1.13479	0.746917	1.50884	0.677592	0.98254
OR2A5	1.31322	0.903572	0.255869	1.45337	0.283175	0.19484	1.50869	0.754959	0.248914	OR2A5										OR2A5							1.50869	0.754959	0.248914
PRAMEF2	1.31736	0.881951	0.751922	1.49369	0.852567	0.570779	1.50778	0.711437	0.743167	PRAMEF2										PRAMEF2				1.49369	0.852567	0.570779	1.50778	0.711437	0.743167
OR2A12	1.31436	0.877691	0.772603	1.49752	0.880267	0.587816	1.50713	0.701217	0.765753	OR2A12										OR2A12				1.49752	0.880267	0.587816	1.50713	0.701217	0.765753
TRPV4	1.30916	0.873134	0.787368	1.49938	0.901772	0.601428	1.5061	0.693728	0.781892	TRPV4										TRPV4				1.49938	0.901772	0.601428	1.5061	0.693728	0.781892
ZNF816	1.35579	0.913071	0.741854	1.48486	0.812482	0.547177	1.50584	0.744111	0.730238	ZNF816										ZNF816	1.35579	0.913071	0.741854	1.48486	0.812482	0.547177	1.50584	0.744111	0.730238
KRT15	1.31756	0.89383	0.555468	1.47406	0.621447	0.421589	1.50584	0.730836	0.545365	KRT15										KRT15				1.47406	0.621447	0.421589	1.50584	0.730836	0.545365
ZSCAN21	1.33542	0.908927	0.585116	1.46923	0.643744	0.438151	1.50564	0.751396	0.572416	ZSCAN21										ZSCAN21	1.33542	0.908927	0.585116	1.46923	0.643744	0.438151	1.50564	0.751396	0.572416
C16orf46_ENST00000378611	1.32852	0.882544	0.881718	1.50533	0.999064	0.663682	1.50542	0.69883	0.87679	C16orf46_ENST00000378611										C16orf46_ENST00000378611				1.50533	0.999064	0.663682	1.50542	0.69883	0.87679
TRIM49B	1.34145	0.931157	0.295902	1.44062	0.317779	0.220585	1.50505	0.796341	0.285844	TRIM49B										TRIM49B	1.34145	0.931157	0.295902				1.50505	0.796341	0.285844
GRM6	1.31252	0.85907	1.18077	1.52784	1.37448	0.899625	1.50151	0.661434	1.18819	GRM6										GRM6	1.31252	0.85907	1.18077	1.52784	1.37448	0.899625	1.50151	0.661434	1.18819
FBXO7	1.32563	0.85868	1.22478	1.5438	1.42635	0.923923	1.50129	0.655533	1.23908	FBXO7										FBXO7	1.32563	0.85868	1.22478	1.5438	1.42635	0.923923	1.50129	0.655533	1.23908
ZNF257	1.35493	0.918346	0.730039	1.4754	0.79495	0.538802	1.49995	0.756894	0.717081	ZNF257										ZNF257	1.35493	0.918346	0.730039	1.4754	0.79495	0.538802	1.49995	0.756894	0.717081
KCNK3	1.30755	0.876154	0.783067	1.49237	0.893755	0.598883	1.49976	0.698125	0.777358	KCNK3										KCNK3				1.49237	0.893755	0.598883	1.49976	0.698125	0.777358
PSEN2	1.30707	0.898264	0.443932	1.4551	0.494211	0.33964	1.49956	0.747972	0.433538	PSEN2										PSEN2							1.49956	0.747972	0.433538
ZNF506	1.35148	0.966003	0.143026	1.39904	0.14806	0.105829	1.49722	0.887324	0.135574	ZNF506										ZNF506	1.35148	0.966003	0.143026				1.49722	0.887324	0.135574
PGC	1.31247	0.885357	0.744958	1.48242	0.841421	0.5676	1.49674	0.715685	0.736456	PGC										PGC				1.48242	0.841421	0.5676	1.49674	0.715685	0.736456
ST8SIA1	1.32394	0.896923	0.729515	1.47609	0.813353	0.551017	1.49491	0.730037	0.719308	ST8SIA1										ST8SIA1				1.47609	0.813353	0.551017	1.49491	0.730037	0.719308
CYP4F11	1.3134	0.887949	0.727984	1.47914	0.819849	0.554275	1.49462	0.717435	0.719521	CYP4F11										CYP4F11				1.47914	0.819849	0.554275	1.49462	0.717435	0.719521
MAP4	1.32187	0.864955	1.26147	1.52825	1.45842	0.954306	1.49421	0.658004	1.27412	MAP4										MAP4	1.32187	0.864955	1.26147	1.52825	1.45842	0.954306	1.49421	0.658004	1.27412
TREML2	1.31174	0.881785	0.818108	1.48759	0.927786	0.623683	1.49298	0.702272	0.812596	TREML2										TREML2				1.48759	0.927786	0.623683	1.49298	0.702272	0.812596
SERPINI1	1.33628	0.870689	1.24291	1.53474	1.42751	0.93013	1.49295	0.659568	1.25897	SERPINI1										SERPINI1	1.33628	0.870689	1.24291	1.53474	1.42751	0.93013	1.49295	0.659568	1.25897
PCDHGA9	1.31397	0.872543	1.00927	1.50591	1.1567	0.768104	1.49286	0.684282	1.00966	PCDHGA9										PCDHGA9	1.31397	0.872543	1.00927	1.50591	1.1567	0.768104	1.49286	0.684282	1.00966
ZP2	1.3233	0.894949	0.744093	1.47863	0.831436	0.562301	1.49235	0.718657	0.736167	ZP2										ZP2				1.47863	0.831436	0.562301	1.49235	0.718657	0.736167
GPR108	1.30087	0.849185	1.27029	1.53191	1.4959	0.976492	1.49234	0.654496	1.28381	GPR108										GPR108	1.30087	0.849185	1.27029	1.53191	1.4959	0.976492	1.49234	0.654496	1.28381
SPATA20	1.31231	0.880677	0.871138	1.49011	0.989168	0.663823	1.49111	0.703849	0.865931	SPATA20										SPATA20				1.49011	0.989168	0.663823	1.49111	0.703849	0.865931
ADD1_ENST00000398125	1.31735	0.867408	1.15386	1.51872	1.33024	0.875898	1.49008	0.669874	1.16182	ADD1_ENST00000398125										ADD1_ENST00000398125	1.31735	0.867408	1.15386	1.51872	1.33024	0.875898	1.49008	0.669874	1.16182
PAOX_ENST00000357296	1.30691	0.875329	0.929357	1.49305	1.06172	0.711112	1.48927	0.688323	0.927377	PAOX_ENST00000357296										PAOX_ENST00000357296				1.49305	1.06172	0.711112	1.48927	0.688323	0.927377
SSTR5	1.29759	0.892032	0.360006	1.45465	0.40358	0.277442	1.48824	0.73008	0.353852	SSTR5										SSTR5							1.48824	0.73008	0.353852
EHD4	1.30318	0.860621	1.14666	1.51423	1.33236	0.879895	1.48725	0.669891	1.15348	EHD4										EHD4	1.30318	0.860621	1.14666	1.51423	1.33236	0.879895	1.48725	0.669891	1.15348
ZNF468	1.34141	0.949901	0.301244	1.41216	0.317132	0.224573	1.48693	0.841506	0.288985	ZNF468										ZNF468	1.34141	0.949901	0.301244				1.48693	0.841506	0.288985
SLC45A1	1.29598	0.871642	0.875568	1.48683	1.0045	0.675602	1.48657	0.690514	0.872633	SLC45A1										SLC45A1	1.29598	0.871642	0.875568	1.48683	1.0045	0.675602	1.48657	0.690514	0.872633
IGSF21	1.29816	0.876867	0.797736	1.48046	0.909757	0.614511	1.4859	0.699008	0.793032	IGSF21										IGSF21				1.48046	0.909757	0.614511	1.4859	0.699008	0.793032
PRKAR1B	1.30475	0.874064	0.949856	1.49274	1.08671	0.727996	1.48584	0.692156	0.947963	PRKAR1B										PRKAR1B				1.49274	1.08671	0.727996	1.48584	0.692156	0.947963
HDAC1	1.31427	0.918539	0.483366	1.43083	0.526233	0.367783	1.4845	0.784711	0.469015	HDAC1										HDAC1							1.4845	0.784711	0.469015
CNKSR3	1.31054	0.883459	0.8748	1.48341	0.990198	0.667513	1.48429	0.706407	0.869832	CNKSR3										CNKSR3				1.48341	0.990198	0.667513	1.48429	0.706407	0.869832
CETN1	1.3124	0.925013	0	1.41879	0	0	1.48401	0.788498	0	CETN1										CETN1							1.48401	0.788498	0
SLC16A12	1.31946	0.892551	0.838674	1.47831	0.939638	0.635618	1.48389	0.716223	0.832156	SLC16A12										SLC16A12				1.47831	0.939638	0.635618	1.48389	0.716223	0.832156
ARHGEF16	1.30581	0.909064	0.389206	1.43644	0.42814	0.298057	1.48267	0.761747	0.379737	ARHGEF16										ARHGEF16							1.48267	0.761747	0.379737
SLC8A3	1.30901	0.874551	1.03863	1.49677	1.18761	0.793446	1.48261	0.684867	1.04017	SLC8A3										SLC8A3				1.49677	1.18761	0.793446	1.48261	0.684867	1.04017
KRT82	1.30149	0.864006	1.13474	1.50634	1.31334	0.871874	1.48238	0.673615	1.14059	KRT82										KRT82	1.30149	0.864006	1.13474	1.50634	1.31334	0.871874	1.48238	0.673615	1.14059
RTN4RL1	1.30039	0.879966	0.817807	1.47778	0.929362	0.628892	1.48221	0.70114	0.813214	RTN4RL1										RTN4RL1				1.47778	0.929362	0.628892	1.48221	0.70114	0.813214
EME2	1.3042	0.826246	1.90927	1.57846	2.31078	1.46394	1.48204	0.602297	1.97557	EME2										EME2	1.3042	0.826246	1.90927	1.57846	2.31078	1.46394	1.48204	0.602297	1.97557
WDFY1	1.3227	0.910921	0.613595	1.45204	0.673599	0.463897	1.48177	0.751517	0.602341	WDFY1										WDFY1							1.48177	0.751517	0.602341
ZNF431	1.34494	0.976102	0.161794	1.37787	0.165755	0.120298	1.48138	0.918747	0.152732	ZNF431										ZNF431	1.34494	0.976102	0.161794				1.48138	0.918747	0.152732
WAC	1.33572	0.814127	2.06172	1.64067	2.53243	1.54353	1.48082	0.551249	2.1962	WAC										WAC	1.33572	0.814127	2.06172	1.64067	2.53243	1.54353	1.48082	0.551249	2.1962
ZNF461	1.34807	0.874361	1.30986	1.54178	1.49808	0.97166	1.48049	0.653126	1.33925	ZNF461										ZNF461	1.34807	0.874361	1.30986	1.54178	1.49808	0.97166	1.48049	0.653126	1.33925
SEC14L4	1.30259	0.886953	0.773414	1.46862	0.87199	0.593749	1.48012	0.719737	0.765532	SEC14L4										SEC14L4				1.46862	0.87199	0.593749	1.48012	0.719737	0.765532
PRR23C	1.30583	0.90566	0.461188	1.44186	0.509228	0.353175	1.47941	0.751286	0.451735	PRR23C										PRR23C							1.47941	0.751286	0.451735
FEM1A	1.30009	0.845568	1.54987	1.53753	1.83293	1.19213	1.47931	0.637558	1.58014	FEM1A										FEM1A	1.30009	0.845568	1.54987	1.53753	1.83293	1.19213	1.47931	0.637558	1.58014
PREP	1.31582	0.89522	0.80682	1.46983	0.901254	0.61317	1.4793	0.724149	0.79903	PREP										PREP				1.46983	0.901254	0.61317	1.4793	0.724149	0.79903
KRI1	1.31335	0.875664	1.04249	1.49983	1.19052	0.793769	1.47906	0.691103	1.04504	KRI1										KRI1				1.49983	1.19052	0.793769	1.47906	0.691103	1.04504
CTAGE1	1.33722	0.940048	0.478605	1.4225	0.509128	0.357912	1.47785	0.814268	0.46332	CTAGE1										CTAGE1	1.33722	0.940048	0.478605				1.47785	0.814268	0.46332
RPS6KL1	1.30277	0.871036	1.07659	1.49565	1.23599	0.82639	1.4778	0.682308	1.07975	RPS6KL1										RPS6KL1	1.30277	0.871036	1.07659	1.49565	1.23599	0.82639	1.4778	0.682308	1.07975
SLCO1B7	1.32545	0.8746	1.23778	1.5155	1.41525	0.933855	1.47662	0.667254	1.25288	SLCO1B7										SLCO1B7				1.5155	1.41525	0.933855	1.47662	0.667254	1.25288
PAG1	1.31911	0.848259	1.61111	1.55508	1.89931	1.22136	1.47654	0.622334	1.65812	PAG1										PAG1	1.31911	0.848259	1.61111	1.55508	1.89931	1.22136	1.47654	0.622334	1.65812
BTBD17	1.29961	0.914176	0.228531	1.42162	0.249985	0.175846	1.4763	0.77357	0.222259	BTBD17										BTBD17							1.4763	0.77357	0.222259
RNF219	1.33393	0.903648	0.906988	1.47616	1.0037	0.679936	1.47578	0.722987	0.902125	RNF219										RNF219	1.33393	0.903648	0.906988	1.47616	1.0037	0.679936	1.47578	0.722987	0.902125
ASMTL	1.29891	0.906887	0.34075	1.43228	0.375736	0.262335	1.47554	0.756793	0.333129	ASMTL										ASMTL							1.47554	0.756793	0.333129
PRSS38	1.29527	0.839106	1.53817	1.54363	1.83311	1.18753	1.475	0.633658	1.57302	PRSS38										PRSS38	1.29527	0.839106	1.53817	1.54363	1.83311	1.18753	1.475	0.633658	1.57302
ZNF493	1.34239	0.932287	0.647626	1.43989	0.694663	0.482441	1.47488	0.787628	0.632999	ZNF493										ZNF493	1.34239	0.932287	0.647626				1.47488	0.787628	0.632999
MSI1	1.30498	0.901144	0.56874	1.44814	0.631131	0.435823	1.4734	0.736385	0.560284	MSI1										MSI1							1.4734	0.736385	0.560284
TCTN2	1.31194	0.878124	1.08077	1.49402	1.23077	0.823793	1.47294	0.687555	1.08499	TCTN2										TCTN2				1.49402	1.23077	0.823793	1.47294	0.687555	1.08499
VIPR1	1.29743	0.895267	0.657053	1.44921	0.733918	0.506425	1.47239	0.73695	0.647254	VIPR1										VIPR1							1.47239	0.73695	0.647254
RNF113B	1.30631	0.915898	0.387229	1.42627	0.422786	0.296429	1.47208	0.770471	0.377729	RNF113B										RNF113B							1.47208	0.770471	0.377729
GPR26	1.29158	0.891065	0.529037	1.44947	0.593712	0.409605	1.47176	0.724797	0.522403	GPR26										GPR26							1.47176	0.724797	0.522403
OR11G2	1.29765	0.833639	2.07389	1.5566	2.48776	1.59819	1.47127	0.609769	2.13988	OR11G2										OR11G2	1.29765	0.833639	2.07389	1.5566	2.48776	1.59819	1.47127	0.609769	2.13988
WDR18	1.30005	0.891137	0.746267	1.45887	0.837432	0.57403	1.47035	0.719375	0.73953	WDR18										WDR18							1.47035	0.719375	0.73953
BIN1	1.3002	0.851778	1.45712	1.52645	1.71068	1.12069	1.46954	0.64543	1.48494	BIN1										BIN1	1.3002	0.851778	1.45712	1.52645	1.71068	1.12069	1.46954	0.64543	1.48494
APBA1	1.30516	0.902429	0.661008	1.44628	0.732477	0.506456	1.46839	0.740334	0.651503	APBA1										APBA1							1.46839	0.740334	0.651503
SLC22A11	1.293	0.885577	0.782346	1.46006	0.883431	0.605064	1.4683	0.714705	0.776367	SLC22A11										SLC22A11				1.46006	0.883431	0.605064	1.4683	0.714705	0.776367
GCK	1.3024	0.897892	0.665063	1.45051	0.740693	0.510643	1.46758	0.727712	0.65762	GCK										GCK							1.46758	0.727712	0.65762
SLC9A3	1.28622	0.878887	0.81877	1.46346	0.931598	0.63657	1.46757	0.705476	0.814434	SLC9A3										SLC9A3				1.46346	0.931598	0.63657	1.46757	0.705476	0.814434
SKOR2	1.29949	0.841364	1.86648	1.54451	2.2184	1.43631	1.46739	0.620012	1.92008	SKOR2										SKOR2	1.29949	0.841364	1.86648	1.54451	2.2184	1.43631	1.46739	0.620012	1.92008
ZNF429	1.332	0.939496	0.537538	1.41779	0.572155	0.403556	1.46664	0.811698	0.521861	ZNF429										ZNF429							1.46664	0.811698	0.521861
MAGEB6	1.30554	0.899999	0.745449	1.4506	0.828277	0.57099	1.46626	0.736033	0.736454	MAGEB6										MAGEB6							1.46626	0.736033	0.736454
MAP4_ENST00000395734	1.30521	0.868992	1.30854	1.50199	1.50582	1.00255	1.46623	0.665584	1.32355	MAP4_ENST00000395734										MAP4_ENST00000395734	1.30521	0.868992	1.30854	1.50199	1.50582	1.00255	1.46623	0.665584	1.32355
TNRC6B_ENST00000301923	1.02819	0.864065	2.71077	1.18994	3.13722	2.63645	1.03824	0.660893	2.98449	TNRC6B_ENST00000301923										TNRC6B_ENST00000301923	1.02819	0.864065	2.71077	1.18994	3.13722	2.63645	1.03824	0.660893	2.98449
COBL	0.995728	0.908152	2.83674	1.09643	3.12364	2.84891	0.994165	0.750618	3.04184	COBL										COBL	0.995728	0.908152	2.83674	1.09643	3.12364	2.84891	0.994165	0.750618	3.04184
DUSP16	0.992738	0.706636	5.45592	1.40488	7.72098	5.49583	0.990148	0.42794	6.94123	DUSP16										DUSP16	0.992738	0.706636	5.45592	1.40488	7.72098	5.49583	0.990148	0.42794	6.94123
MTMR2	0.984104	0.863029	2.85021	1.14029	3.30256	2.89624	0.979275	0.6473	3.19047	MTMR2										MTMR2	0.984104	0.863029	2.85021	1.14029	3.30256	2.89624	0.979275	0.6473	3.19047
ATP6V1B1	0.984466	0.91445	2.93286	1.07657	3.20724	2.97914	0.978284	0.774608	3.1355	ATP6V1B1										ATP6V1B1	0.984466	0.91445	2.93286	1.07657	3.20724	2.97914	0.978284	0.774608	3.1355
EPYC	0.904717	0.927923	2.99445	0.974991	3.22704	3.30982	0.875309	0.793509	3.24906	EPYC										EPYC	0.904717	0.927923	2.99445	0.974991	3.22704	3.30982	0.875309	0.793509	3.24906
TRIM22	0.903796	0.902077	2.7412	1.00191	3.03877	3.03299	0.874935	0.739614	3.03721	TRIM22										TRIM22	0.903796	0.902077	2.7412	1.00191	3.03877	3.03299	0.874935	0.739614	3.03721
RBM46	0.865364	0.904001	3.08874	0.957259	3.41675	3.5693	0.832983	0.719168	3.45146	RBM46										RBM46	0.865364	0.904001	3.08874	0.957259	3.41675	3.5693	0.832983	0.719168	3.45146
ELF4	0.869846	0.948756	3.24699	0.916828	3.42236	3.73283	0.827861	0.852562	3.50684	ELF4										ELF4	0.869846	0.948756	3.24699	0.916828	3.42236	3.73283	0.827861	0.852562	3.50684
GFI1	0.846982	0.97868	2.82775	0.865433	2.88935	3.33862	0.799288	0.934748	3.00655	GFI1										GFI1	0.846982	0.97868	2.82775	0.865433	2.88935	3.33862	0.799288	0.934748	3.00655
ZNF276	0.837633	0.778819	6.32977	1.07552	8.12739	7.55673	0.789966	0.520207	7.95831	ZNF276										ZNF276	0.837633	0.778819	6.32977	1.07552	8.12739	7.55673	0.789966	0.520207	7.95831
AMBRA1	0.833497	0.962081	2.80683	0.866348	2.91746	3.36754	0.785379	0.886646	3.03088	AMBRA1										AMBRA1	0.833497	0.962081	2.80683	0.866348	2.91746	3.36754	0.785379	0.886646	3.03088
B3GALT1	0.81916	0.800105	5.2243	1.02382	6.52952	6.37763	0.770936	0.546506	6.48797	B3GALT1										B3GALT1	0.81916	0.800105	5.2243	1.02382	6.52952	6.37763	0.770936	0.546506	6.48797
FAS	0.801134	0.944799	2.74541	0.847941	2.90581	3.4269	0.754211	0.831331	3.021	FAS										FAS	0.801134	0.944799	2.74541	0.847941	2.90581	3.4269	0.754211	0.831331	3.021
SF3B4	0.798723	0.985522	3.87065	0.810457	3.92751	4.84604	0.740212	0.954084	4.15487	SF3B4										SF3B4	0.798723	0.985522	3.87065	0.810457	3.92751	4.84604	0.740212	0.954084	4.15487
IFT57	0.785165	0.921764	2.9105	0.851808	3.15753	3.70686	0.734014	0.780093	3.28381	IFT57										IFT57	0.785165	0.921764	2.9105	0.851808	3.15753	3.70686	0.734014	0.780093	3.28381
SH2B1_ENST00000359285	0.79299	0.987121	3.07327	0.803336	3.11337	3.87555	0.732402	0.96062	3.30525	SH2B1_ENST00000359285										SH2B1_ENST00000359285	0.79299	0.987121	3.07327	0.803336	3.11337	3.87555	0.732402	0.96062	3.30525
ELL	0.789924	0.989616	2.88128	0.798212	2.91151	3.64754	0.728026	0.968632	3.09835	ELL										ELL	0.789924	0.989616	2.88128	0.798212	2.91151	3.64754	0.728026	0.968632	3.09835
YLPM1	0.77574	0.945204	2.69711	0.820712	2.85347	3.47682	0.723786	0.836779	2.99102	YLPM1										YLPM1	0.77574	0.945204	2.69711	0.820712	2.85347	3.47682	0.723786	0.836779	2.99102
COLQ	0.781569	0.95842	3.28973	0.815477	3.43245	4.20913	0.719161	0.881825	3.63075	COLQ										COLQ	0.781569	0.95842	3.28973	0.815477	3.43245	4.20913	0.719161	0.881825	3.63075
IWS1	0.761377	0.951329	2.77447	0.800329	2.91642	3.64402	0.713308	0.840627	3.0579	IWS1										IWS1	0.761377	0.951329	2.77447	0.800329	2.91642	3.64402	0.713308	0.840627	3.0579
SPRED1	0.758986	0.890165	3.39339	0.852636	3.81209	4.47095	0.709688	0.693618	3.94999	SPRED1										SPRED1	0.758986	0.890165	3.39339	0.852636	3.81209	4.47095	0.709688	0.693618	3.94999
CYLD	0.759862	0.899344	3.37447	0.844906	3.75215	4.4409	0.70606	0.725039	3.90646	CYLD										CYLD	0.759862	0.899344	3.37447	0.844906	3.75215	4.4409	0.70606	0.725039	3.90646
LHX3	0.768058	0.998641	2.90908	0.769103	2.91304	3.78758	0.70363	0.995738	3.12462	LHX3										LHX3	0.768058	0.998641	2.90908	0.769103	2.91304	3.78758	0.70363	0.995738	3.12462
GGT7	0.765614	1.01679	3.07314	0.75297	3.02238	4.01395	0.697862	1.05433	3.26535	GGT7										GGT7	0.765614	1.01679	3.07314	0.75297	3.02238	4.01395	0.697862	1.05433	3.26535
BRD7	0.748897	0.848403	4.56044	0.882714	5.37532	6.08955	0.693911	0.616415	5.53889	BRD7										BRD7	0.748897	0.848403	4.56044	0.882714	5.37532	6.08955	0.693911	0.616415	5.53889
GATA3	0.755186	1.00467	3.08315	0.751678	3.06882	4.08263	0.690804	1.01539	3.30211	GATA3										GATA3	0.755186	1.00467	3.08315	0.751678	3.06882	4.08263	0.690804	1.01539	3.30211
ING1	0.75304	0.914618	4.11888	0.823338	4.50338	5.46967	0.688831	0.771105	4.74265	ING1										ING1	0.75304	0.914618	4.11888	0.823338	4.50338	5.46967	0.688831	0.771105	4.74265
ZNRF3	0.750924	0.961619	3.93722	0.780896	4.09437	5.24317	0.684904	0.886478	4.37058	ZNRF3										ZNRF3	0.750924	0.961619	3.93722	0.780896	4.09437	5.24317	0.684904	0.886478	4.37058
SLC16A8	0.754153	1.0262	3.82606	0.734899	3.72839	5.07333	0.683064	1.0876	4.05443	SLC16A8										SLC16A8	0.754153	1.0262	3.82606	0.734899	3.72839	5.07333	0.683064	1.0876	4.05443
PAN3	0.73895	0.983738	3.04967	0.751165	3.10008	4.12703	0.676217	0.947962	3.32587	PAN3										PAN3	0.73895	0.983738	3.04967	0.751165	3.10008	4.12703	0.676217	0.947962	3.32587
ZNF14	0.724241	0.925466	2.78861	0.78257	3.01319	3.85038	0.675134	0.771073	3.16648	ZNF14										ZNF14	0.724241	0.925466	2.78861	0.78257	3.01319	3.85038	0.675134	0.771073	3.16648
ARHGAP35	0.734489	0.971638	3.03074	0.755928	3.1192	4.12632	0.671272	0.912852	3.34263	ARHGAP35										ARHGAP35	0.734489	0.971638	3.03074	0.755928	3.1192	4.12632	0.671272	0.912852	3.34263
ING1_ENST00000338450	0.735886	0.893913	4.86215	0.823219	5.43918	6.60721	0.669857	0.722727	5.72497	ING1_ENST00000338450										ING1_ENST00000338450	0.735886	0.893913	4.86215	0.823219	5.43918	6.60721	0.669857	0.722727	5.72497
RNF6	0.722653	0.944854	2.6984	0.76483	2.85589	3.73402	0.669402	0.828816	3.0245	RNF6										RNF6	0.722653	0.944854	2.6984	0.76483	2.85589	3.73402	0.669402	0.828816	3.0245
LMAN1	0.72618	0.937168	2.93721	0.774867	3.13414	4.04475	0.666798	0.818684	3.32927	LMAN1										LMAN1	0.72618	0.937168	2.93721	0.774867	3.13414	4.04475	0.666798	0.818684	3.32927
SLC16A1	0.7321	0.893211	4.45082	0.819627	4.98294	6.07952	0.665952	0.723445	5.2504	SLC16A1										SLC16A1	0.7321	0.893211	4.45082	0.819627	4.98294	6.07952	0.665952	0.723445	5.2504
ZNF750	0.727696	0.874646	5.23476	0.831989	5.985	7.19361	0.657837	0.689846	6.29345	ZNF750										ZNF750	0.727696	0.874646	5.23476	0.831989	5.985	7.19361	0.657837	0.689846	6.29345
RIC8A	0.726891	1.02617	3.02873	0.708353	2.95149	4.1667	0.656948	1.08985	3.22297	RIC8A										RIC8A	0.726891	1.02617	3.02873	0.708353	2.95149	4.1667	0.656948	1.08985	3.22297
CDC7	0.70654	0.968768	2.78153	0.729318	2.8712	3.93683	0.651942	0.893811	3.06495	CDC7										CDC7	0.70654	0.968768	2.78153	0.729318	2.8712	3.93683	0.651942	0.893811	3.06495
BMPR2	0.703672	0.949867	3.30827	0.740811	3.48287	4.70143	0.64262	0.845746	3.72899	BMPR2										BMPR2	0.703672	0.949867	3.30827	0.740811	3.48287	4.70143	0.64262	0.845746	3.72899
CCR7	0.717366	0.736563	8.83555	0.973937	11.9956	12.3167	0.640284	0.481359	12.093	CCR7										CCR7	0.717366	0.736563	8.83555	0.973937	11.9956	12.3167	0.640284	0.481359	12.093
SMARCD2_ENST00000323347	0.708064	0.891674	4.47948	0.794084	5.02367	6.32637	0.63508	0.729185	5.34935	SMARCD2_ENST00000323347										SMARCD2_ENST00000323347	0.708064	0.891674	4.47948	0.794084	5.02367	6.32637	0.63508	0.729185	5.34935
PRRT2	0.701686	0.756064	8.22022	0.928078	10.8724	11.715	0.627107	0.497779	11.1083	PRRT2										PRRT2	0.701686	0.756064	8.22022	0.928078	10.8724	11.715	0.627107	0.497779	11.1083
COLQ_ENST00000383781	0.680097	0.995561	3.26737	0.683129	3.28194	4.80427	0.603012	0.986554	3.62403	COLQ_ENST00000383781										COLQ_ENST00000383781	0.680097	0.995561	3.26737	0.683129	3.28194	4.80427	0.603012	0.986554	3.62403
USP43	0.667268	0.976093	3.75274	0.683611	3.84465	5.62403	0.591647	0.928279	4.23147	USP43										USP43	0.667268	0.976093	3.75274	0.683611	3.84465	5.62403	0.591647	0.928279	4.23147
NSUN6	0.649897	0.96085	3.11092	0.676377	3.23768	4.78679	0.585899	0.876956	3.52393	NSUN6										NSUN6	0.649897	0.96085	3.11092	0.676377	3.23768	4.78679	0.585899	0.876956	3.52393
WNT10B	0.659913	1.04584	2.9505	0.630987	2.82117	4.47104	0.582285	1.16188	3.16085	WNT10B										WNT10B	0.659913	1.04584	2.9505	0.630987	2.82117	4.47104	0.582285	1.16188	3.16085
USP45	0.634608	0.933865	3.34485	0.67955	3.58172	5.27073	0.575774	0.794081	3.86825	USP45										USP45	0.634608	0.933865	3.34485	0.67955	3.58172	5.27073	0.575774	0.794081	3.86825
KDM6A_ENST00000382899	0.628851	0.834996	4.71312	0.753119	5.64449	7.49482	0.562687	0.599605	6.02321	KDM6A_ENST00000382899										KDM6A_ENST00000382899	0.628851	0.834996	4.71312	0.753119	5.64449	7.49482	0.562687	0.599605	6.02321
TSC2	0.62851	1.05267	3.14924	0.597062	2.99167	5.01065	0.545957	1.18351	3.40191	TSC2										TSC2	0.62851	1.05267	3.14924	0.597062	2.99167	5.01065	0.545957	1.18351	3.40191
TSC1	0.617257	0.957526	4.02655	0.644637	4.20516	6.5233	0.545435	0.870505	4.64645	TSC1										TSC1	0.617257	0.957526	4.02655	0.644637	4.20516	6.5233	0.545435	0.870505	4.64645
TCEA3	0.604515	1.03575	2.93611	0.583647	2.83475	4.85697	0.530937	1.13025	3.19426	TCEA3										TCEA3	0.604515	1.03575	2.93611	0.583647	2.83475	4.85697	0.530937	1.13025	3.19426
BCOR	0.606025	0.997253	3.7386	0.607695	3.74889	6.16904	0.529772	0.991101	4.20872	BCOR										BCOR	0.606025	0.997253	3.7386	0.607695	3.74889	6.16904	0.529772	0.991101	4.20872
DAXX	0.600739	1.03474	3.00333	0.580569	2.90249	4.99939	0.523412	1.1206	3.29169	DAXX										DAXX	0.600739	1.03474	3.00333	0.580569	2.90249	4.99939	0.523412	1.1206	3.29169
FUBP1_ENST00000370767	0.589225	0.976903	2.832	0.603156	2.89896	4.80632	0.522902	0.926421	3.22031	FUBP1_ENST00000370767										FUBP1_ENST00000370767	0.589225	0.976903	2.832	0.603156	2.89896	4.80632	0.522902	0.926421	3.22031
SMARCD2	0.603633	0.932929	4.90298	0.64703	5.25547	8.12245	0.520188	0.820625	5.87873	SMARCD2										SMARCD2	0.603633	0.932929	4.90298	0.64703	5.25547	8.12245	0.520188	0.820625	5.87873
FAT1	0.587074	0.980584	3.83112	0.598698	3.90698	6.52579	0.514681	0.937294	4.37229	FAT1										FAT1	0.587074	0.980584	3.83112	0.598698	3.90698	6.52579	0.514681	0.937294	4.37229
TCF7L2_ENST00000355717	0.589668	0.967998	3.66147	0.609162	3.78252	6.20938	0.513138	0.90526	4.24808	TCF7L2_ENST00000355717										TCF7L2_ENST00000355717	0.589668	0.967998	3.66147	0.609162	3.78252	6.20938	0.513138	0.90526	4.24808
ARID1B	0.580375	1.02987	2.99914	0.563543	2.91217	5.1676	0.504675	1.10385	3.31055	ARID1B										ARID1B	0.580375	1.02987	2.99914	0.563543	2.91217	5.1676	0.504675	1.10385	3.31055
PTCH1	0.584651	0.981631	4.24065	0.595591	4.32	7.25331	0.504321	0.944193	4.89074	PTCH1										PTCH1	0.584651	0.981631	4.24065	0.595591	4.32	7.25331	0.504321	0.944193	4.89074
MGA	0.570462	0.962109	3.70466	0.592928	3.85056	6.49414	0.50153	0.880738	4.29607	MGA										MGA	0.570462	0.962109	3.70466	0.592928	3.85056	6.49414	0.50153	0.880738	4.29607
TCF7L2	0.571515	1.02238	3.24965	0.559005	3.17851	5.68602	0.491552	1.07322	3.64157	TCF7L2										TCF7L2	0.571515	1.02238	3.24965	0.559005	3.17851	5.68602	0.491552	1.07322	3.64157
CSNK2A1	0.556359	0.974911	3.45926	0.570677	3.54829	6.21768	0.483137	0.922804	4.01134	CSNK2A1										CSNK2A1	0.556359	0.974911	3.45926	0.570677	3.54829	6.21768	0.483137	0.922804	4.01134
ASXL2	0.550655	1.01047	3.09799	0.544952	3.06591	5.62602	0.479938	1.03622	3.47689	ASXL2										ASXL2	0.550655	1.01047	3.09799	0.544952	3.06591	5.62602	0.479938	1.03622	3.47689
CCND3	0.559164	1.02957	3.81002	0.543105	3.70059	6.81377	0.477048	1.09939	4.26935	CCND3										CCND3	0.559164	1.02957	3.81002	0.543105	3.70059	6.81377	0.477048	1.09939	4.26935
ACVR2A	0.542236	0.96215	3.58854	0.563567	3.72971	6.61804	0.475894	0.878777	4.17867	ACVR2A										ACVR2A	0.542236	0.96215	3.58854	0.563567	3.72971	6.61804	0.475894	0.878777	4.17867
DYRK1A_ENST00000338785	0.542598	0.959213	3.76028	0.56567	3.92017	6.93014	0.472825	0.873933	4.41271	DYRK1A_ENST00000338785										DYRK1A_ENST00000338785	0.542598	0.959213	3.76028	0.56567	3.92017	6.93014	0.472825	0.873933	4.41271
NCOR1	0.539716	1.01032	2.99451	0.534203	2.96392	5.54831	0.469536	1.03549	3.37025	NCOR1										NCOR1	0.539716	1.01032	2.99451	0.534203	2.96392	5.54831	0.469536	1.03549	3.37025
NCOR1_ENST00000395851	0.539129	0.998702	3.15226	0.539829	3.15636	5.84696	0.469011	0.995656	3.58272	NCOR1_ENST00000395851										NCOR1_ENST00000395851	0.539129	0.998702	3.15226	0.539829	3.15636	5.84696	0.469011	0.995656	3.58272
CEBPA	0.538246	1.10986	2.87106	0.484968	2.58687	5.33411	0.459649	1.50352	3.01781	CEBPA										CEBPA	0.538246	1.10986	2.87106				0.459649	1.50352	3.01781
MSH2	0.524829	0.927442	3.42599	0.565889	3.69402	6.52782	0.458456	0.793268	4.14416	MSH2										MSH2	0.524829	0.927442	3.42599	0.565889	3.69402	6.52782	0.458456	0.793268	4.14416
KDM6A	0.527382	0.834288	5.18345	0.632134	6.21303	9.82865	0.458185	0.599529	6.85983	KDM6A										KDM6A	0.527382	0.834288	5.18345	0.632134	6.21303	9.82865	0.458185	0.599529	6.85983
CDCA7L	0.530096	1.04313	2.94485	0.508179	2.82309	5.5553	0.457431	1.16102	3.2456	CDCA7L										CDCA7L	0.530096	1.04313	2.94485	0.508179	2.82309	5.5553	0.457431	1.16102	3.2456
CTNND1	0.533048	1.02693	3.31308	0.519072	3.22621	6.21534	0.456862	1.09298	3.7191	CTNND1										CTNND1	0.533048	1.02693	3.31308	0.519072	3.22621	6.21534	0.456862	1.09298	3.7191
TGIF1	0.536482	0.931395	6.21549	0.575999	6.67332	11.5857	0.456076	0.80757	7.59101	TGIF1										TGIF1	0.536482	0.931395	6.21549	0.575999	6.67332	11.5857	0.456076	0.80757	7.59101
CDK12	0.522077	1.0571	2.97581	0.493875	2.81507	5.69995	0.445901	1.21353	3.2709	CDK12										CDK12	0.522077	1.0571	2.97581	0.493875	2.81507	5.69995	0.445901	1.21353	3.2709
BCOR_ENST00000378463	0.516275	1.05346	2.9286	0.490077	2.77999	5.67255	0.441701	1.20011	3.22592	BCOR_ENST00000378463										BCOR_ENST00000378463	0.516275	1.05346	2.9286	0.490077	2.77999	5.67255	0.441701	1.20011	3.22592
NAA15	0.496514	1.02722	2.67545	0.483356	2.60455	5.38847	0.430673	1.10004	2.98622	NAA15										NAA15	0.496514	1.02722	2.67545				0.430673	1.10004	2.98622
MLH1	0.502947	0.978746	4.18322	0.513869	4.27406	8.31741	0.429309	0.932766	4.91586	MLH1										MLH1	0.502947	0.978746	4.18322	0.513869	4.27406	8.31741	0.429309	0.932766	4.91586
ASXL2_ENST00000435504	0.498625	1.0401	2.85103	0.479403	2.74112	5.71777	0.42822	1.14822	3.17101	ASXL2_ENST00000435504										ASXL2_ENST00000435504	0.498625	1.0401	2.85103	0.479403	2.74112	5.71777	0.42822	1.14822	3.17101
LUC7L2_ENST00000541170	0.487947	1.01048	3.06273	0.482885	3.03096	6.27677	0.425362	1.03921	3.45101	LUC7L2_ENST00000541170										LUC7L2_ENST00000541170	0.487947	1.01048	3.06273	0.482885	3.03096	6.27677	0.425362	1.03921	3.45101
TCF7L2_ENST00000543371	0.499427	1.05097	3.27367	0.475204	3.1149	6.55486	0.419718	1.1784	3.66973	TCF7L2_ENST00000543371										TCF7L2_ENST00000543371	0.499427	1.05097	3.27367	0.475204	3.1149	6.55486	0.419718	1.1784	3.66973
ASXL1_ENST00000306058	0.486312	0.918019	5.68443	0.529741	6.19206	11.6888	0.412113	0.77075	7.09469	ASXL1_ENST00000306058										ASXL1_ENST00000306058	0.486312	0.918019	5.68443	0.529741	6.19206	11.6888	0.412113	0.77075	7.09469
LUC7L2	0.47223	0.988804	3.52638	0.477577	3.56631	7.46751	0.409525	0.960465	4.06969	LUC7L2										LUC7L2	0.47223	0.988804	3.52638	0.477577	3.56631	7.46751	0.409525	0.960465	4.06969
KMT2C	0.473462	0.972068	3.67393	0.487066	3.7795	7.75972	0.407405	0.909626	4.33243	KMT2C										KMT2C	0.473462	0.972068	3.67393	0.487066	3.7795	7.75972	0.407405	0.909626	4.33243
RAD21	0.463129	1.04724	2.76963	0.442237	2.6447	5.98027	0.399581	1.1932	3.05458	RAD21										RAD21	0.463129	1.04724	2.76963				0.399581	1.1932	3.05458
ASXL1	0.466782	0.88539	6.35949	0.527205	7.1827	13.6241	0.393176	0.699043	8.23786	ASXL1										ASXL1	0.466782	0.88539	6.35949	0.527205	7.1827	13.6241	0.393176	0.699043	8.23786
NOTCH2	0.459938	1.07808	2.85735	0.426627	2.6504	6.21246	0.38973	1.32813	3.11762	NOTCH2										NOTCH2	0.459938	1.07808	2.85735				0.38973	1.32813	3.11762
HLA-B	0.464676	1.03428	3.62577	0.449274	3.5056	7.80281	0.387743	1.11693	4.15423	HLA-B										HLA-B	0.464676	1.03428	3.62577	0.449274	3.5056	7.80281	0.387743	1.11693	4.15423
HLA-A	0.459169	0.884094	6.02834	0.519367	6.81867	13.1288	0.383453	0.70418	7.87877	HLA-A										HLA-A	0.459169	0.884094	6.02834	0.519367	6.81867	13.1288	0.383453	0.70418	7.87877
CCR4	0.466182	0.631166	10.2728	0.738604	16.2759	22.036	0.382989	0.362598	17.6723	CCR4										CCR4	0.466182	0.631166	10.2728	0.738604	16.2759	22.036	0.382989	0.362598	17.6723
LUC7L2_ENST00000263545	0.439239	1.02762	3.0327	0.427434	2.9512	6.90445	0.378287	1.10834	3.41088	LUC7L2_ENST00000263545										LUC7L2_ENST00000263545	0.439239	1.02762	3.0327	0.427434	2.9512	6.90445	0.378287	1.10834	3.41088
CREBBP	0.449398	1.07751	2.84292	0.417072	2.63843	6.32606	0.375375	1.29761	3.14772	CREBBP										CREBBP	0.449398	1.07751	2.84292				0.375375	1.29761	3.14772
STAG2	0.43059	0.902682	4.49669	0.477012	4.98148	10.4431	0.371492	0.717736	5.6669	STAG2										STAG2	0.43059	0.902682	4.49669	0.477012	4.98148	10.4431	0.371492	0.717736	5.6669
PPM1D	0.435868	0.847579	6.46336	0.514251	7.62567	14.8287	0.36605	0.623919	8.75114	PPM1D										PPM1D	0.435868	0.847579	6.46336	0.514251	7.62567	14.8287	0.36605	0.623919	8.75114
FGFR2_ENST00000351936	0.436855	1.23145	0.701812	0.354749	0.569908	1.60651	0.364023	2.59406	0.692376	FGFR2_ENST00000351936										FGFR2_ENST00000351936	0.436855	1.23145	0.701812	0.354749	0.569908	1.60651	0.364023	2.59406	0.692376
KDM5C_ENST00000452825	0.441916	1.11564	2.82026	0.396111	2.52793	6.38188	0.363757	1.47907	3.06503	KDM5C_ENST00000452825										KDM5C_ENST00000452825	0.441916	1.11564	2.82026				0.363757	1.47907	3.06503
SMAD3_ENST00000439724	0.44153	1.14889	2.28045	0.384308	1.9849	5.16487	0.36349	1.68178	2.41609	SMAD3_ENST00000439724										SMAD3_ENST00000439724	0.44153	1.14889	2.28045				0.36349	1.68178	2.41609
PDCD1	0.441337	1.14668	2.41483	0.384882	2.10593	5.47162	0.362775	1.66923	2.56489	PDCD1										PDCD1	0.441337	1.14668	2.41483				0.362775	1.66923	2.56489
RARA	0.4383	1.26793	0.289286	0.345682	0.228157	0.660018	0.358057	2.9956	0.282644	RARA										RARA	0.4383	1.26793	0.289286	0.345682	0.228157	0.660018	0.358057	2.9956	0.282644
YES1	0.41849	1.16371	1.31637	0.359618	1.13118	3.14551	0.355923	1.92415	1.34388	YES1										YES1	0.41849	1.16371	1.31637	0.359618	1.13118	3.14551	0.355923	1.92415	1.34388
KDM5C	0.43367	1.1148	2.88337	0.389011	2.58644	6.64875	0.355673	1.47077	3.14704	KDM5C										KDM5C	0.43367	1.1148	2.88337				0.355673	1.47077	3.14704
ETV6	0.429061	1.1898	1.48515	0.360616	1.24824	3.4614	0.355323	2.05598	1.51908	ETV6										ETV6	0.429061	1.1898	1.48515	0.360616	1.24824	3.4614	0.355323	2.05598	1.51908
MPL	0.433183	1.24994	0.870421	0.346565	0.696373	2.00936	0.354701	2.47962	0.863988	MPL										MPL	0.433183	1.24994	0.870421	0.346565	0.696373	2.00936	0.354701	2.47962	0.863988
TBX3	0.42931	1.17249	2.2354	0.366153	1.90654	5.20695	0.353778	1.96012	2.31814	TBX3										TBX3	0.42931	1.17249	2.2354	0.366153	1.90654	5.20695	0.353778	1.96012	2.31814
FLT3	0.419206	1.2442	0.53783	0.336929	0.432271	1.28297	0.353246	2.80754	0.522002	FLT3										FLT3	0.419206	1.2442	0.53783	0.336929	0.432271	1.28297	0.353246	2.80754	0.522002
KDM5A	0.418492	1.16799	1.44284	0.358301	1.23532	3.44772	0.352683	1.95666	1.4782	KDM5A										KDM5A	0.418492	1.16799	1.44284	0.358301	1.23532	3.44772	0.352683	1.95666	1.4782
ACVR1B	0.426922	1.15778	2.07602	0.368743	1.79311	4.86276	0.352634	1.78036	2.17911	ACVR1B										ACVR1B	0.426922	1.15778	2.07602	0.368743	1.79311	4.86276	0.352634	1.78036	2.17911
GATA1_ENST00000376665	0.431768	1.26715	0.454984	0.340741	0.359062	1.05377	0.35211	2.91716	0.4459	GATA1_ENST00000376665										GATA1_ENST00000376665	0.431768	1.26715	0.454984	0.340741	0.359062	1.05377	0.35211	2.91716	0.4459
CIC	0.435888	1.1818	2.64963	0.368834	2.24203	6.0787	0.351605	1.89405	2.78023	CIC										CIC	0.435888	1.1818	2.64963	0.368834	2.24203	6.0787	0.351605	1.89405	2.78023
TBL1XR1	0.411357	1.20488	0.70936	0.341408	0.588739	1.72444	0.350761	2.5896	0.698645	TBL1XR1										TBL1XR1	0.411357	1.20488	0.70936	0.341408	0.588739	1.72444	0.350761	2.5896	0.698645
RSL1D1	0.419524	1.23708	0.57943	0.339123	0.468384	1.38116	0.350556	2.78602	0.56796	RSL1D1										RSL1D1	0.419524	1.23708	0.57943	0.339123	0.468384	1.38116	0.350556	2.78602	0.56796
NF1	0.414761	0.8447	6.28321	0.491015	7.43839	15.149	0.348561	0.614394	8.55956	NF1										NF1	0.414761	0.8447	6.28321	0.491015	7.43839	15.149	0.348561	0.614394	8.55956
PLK2	0.414595	1.13515	2.00827	0.365235	1.76917	4.84393	0.347941	1.67574	2.11754	PLK2										PLK2	0.414595	1.13515	2.00827	0.365235	1.76917	4.84393	0.347941	1.67574	2.11754
BIRC3	0.408765	1.13738	1.67208	0.359392	1.47011	4.09055	0.347479	1.73135	1.74174	BIRC3										BIRC3	0.408765	1.13738	1.67208	0.359392	1.47011	4.09055	0.347479	1.73135	1.74174
CHEK1	0.413917	1.22206	0.806774	0.338704	0.660174	1.94912	0.347208	2.52113	0.797924	CHEK1										CHEK1	0.413917	1.22206	0.806774	0.338704	0.660174	1.94912	0.347208	2.52113	0.797924
TROAP	0.422766	1.25543	0.615295	0.336749	0.490105	1.4554	0.347176	2.7975	0.604897	TROAP										TROAP	0.422766	1.25543	0.615295	0.336749	0.490105	1.4554	0.347176	2.7975	0.604897
AURKA	0.412437	1.14876	1.65772	0.359029	1.44306	4.01934	0.346695	1.73913	1.73131	AURKA										AURKA	0.412437	1.14876	1.65772	0.359029	1.44306	4.01934	0.346695	1.73913	1.73131
CDKN1A_ENST00000448526	0.425224	0.9906	5.26645	0.429259	5.31642	12.3851	0.346127	0.971571	6.39836	CDKN1A_ENST00000448526										CDKN1A_ENST00000448526	0.425224	0.9906	5.26645	0.429259	5.31642	12.3851	0.346127	0.971571	6.39836
RAD50	0.405187	1.16366	1.2602	0.348201	1.08296	3.11016	0.345706	1.93012	1.28438	RAD50										RAD50	0.405187	1.16366	1.2602	0.348201	1.08296	3.11016	0.345706	1.93012	1.28438
EGFR_ENST00000342916	0.419649	1.27106	0.275646	0.330157	0.216863	0.656848	0.344998	3.16848	0.267568	EGFR_ENST00000342916										EGFR_ENST00000342916	0.419649	1.27106	0.275646	0.330157	0.216863	0.656848	0.344998	3.16848	0.267568
DDX3X	0.405184	1.16282	1.64414	0.348449	1.41392	4.05777	0.339613	1.91831	1.69865	DDX3X										DDX3X	0.405184	1.16282	1.64414	0.348449	1.41392	4.05777	0.339613	1.91831	1.69865
HNRNPA2B1	0.404616	1.17499	1.45059	0.344358	1.23456	3.58511	0.339124	2.02229	1.48559	HNRNPA2B1										HNRNPA2B1	0.404616	1.17499	1.45059	0.344358	1.23456	3.58511	0.339124	2.02229	1.48559
NOTCH1	0.412507	1.07864	3.98997	0.382431	3.69907	9.6725	0.339071	1.31554	4.46915	NOTCH1										NOTCH1	0.412507	1.07864	3.98997	0.382431	3.69907	9.6725	0.339071	1.31554	4.46915
MANEA	0.400398	1.18581	1.23734	0.337657	1.04346	3.09028	0.33661	2.13672	1.25447	MANEA										MANEA	0.400398	1.18581	1.23734	0.337657	1.04346	3.09028	0.33661	2.13672	1.25447
TRDN	0.395303	1.15649	1.37224	0.341812	1.18655	3.47136	0.336595	1.88418	1.40838	TRDN										TRDN	0.395303	1.15649	1.37224	0.341812	1.18655	3.47136	0.336595	1.88418	1.40838
UPF3B	0.397351	1.07648	2.48084	0.369122	2.30459	6.24345	0.336533	1.32775	2.72525	UPF3B										UPF3B	0.397351	1.07648	2.48084	0.369122	2.30459	6.24345	0.336533	1.32775	2.72525
NONO	0.40488	1.19229	1.35048	0.339583	1.13268	3.33551	0.336414	2.10127	1.37744	NONO										NONO	0.40488	1.19229	1.35048	0.339583	1.13268	3.33551	0.336414	2.10127	1.37744
AGBL3	0.398976	1.03643	3.05887	0.384951	2.95135	7.6668	0.336261	1.13609	3.49025	AGBL3										AGBL3	0.398976	1.03643	3.05887	0.384951	2.95135	7.6668	0.336261	1.13609	3.49025
SHQ1	0.401596	1.15966	1.63073	0.346306	1.40621	4.06061	0.336146	1.83968	1.69429	SHQ1										SHQ1	0.401596	1.15966	1.63073	0.346306	1.40621	4.06061	0.336146	1.83968	1.69429
FGFR2	0.405931	1.24685	0.656745	0.325564	0.526722	1.61787	0.335208	2.81719	0.646326	FGFR2										FGFR2	0.405931	1.24685	0.656745	0.325564	0.526722	1.61787	0.335208	2.81719	0.646326
WT1_ENST00000379079	0.401816	1.0078	3.917	0.398706	3.88668	9.74823	0.335076	1.02656	4.616	WT1_ENST00000379079										WT1_ENST00000379079	0.401816	1.0078	3.917	0.398706	3.88668	9.74823	0.335076	1.02656	4.616
STAT5B	0.408795	1.25494	0.848508	0.325749	0.676135	2.07563	0.33355	2.62115	0.841476	STAT5B										STAT5B	0.408795	1.25494	0.848508	0.325749	0.676135	2.07563	0.33355	2.62115	0.841476
ZFP36L2	0.409543	1.17222	3.20714	0.349375	2.73596	7.83103	0.332221	1.93489	3.36925	ZFP36L2										ZFP36L2	0.409543	1.17222	3.20714	0.349375	2.73596	7.83103	0.332221	1.93489	3.36925
SMARCA4	0.407523	1.16178	2.3951	0.350776	2.06158	5.87721	0.33161	1.77916	2.53994	SMARCA4										SMARCA4	0.407523	1.16178	2.3951	0.350776	2.06158	5.87721	0.33161	1.77916	2.53994
SLC27A3	0.416224	1.16732	2.99609	0.356565	2.56665	7.19827	0.331208	1.73124	3.22207	SLC27A3										SLC27A3	0.416224	1.16732	2.99609	0.356565	2.56665	7.19827	0.331208	1.73124	3.22207
CDH1	0.403954	0.952321	6.2216	0.424178	6.53309	15.4018	0.329969	0.861278	7.81032	CDH1										CDH1	0.403954	0.952321	6.2216	0.424178	6.53309	15.4018	0.329969	0.861278	7.81032
AXIN1	0.400621	0.955267	6.27664	0.419381	6.57057	15.6673	0.327227	0.868431	7.86088	AXIN1										AXIN1	0.400621	0.955267	6.27664	0.419381	6.57057	15.6673	0.327227	0.868431	7.86088
CD79B	0.403969	1.19971	1.77325	0.336723	1.47807	4.38957	0.327061	2.03552	1.83918	CD79B										CD79B	0.403969	1.19971	1.77325	0.336723	1.47807	4.38957	0.327061	2.03552	1.83918
KMT2D	0.402386	0.978958	5.18276	0.411035	5.29416	12.8801	0.326341	0.93779	6.3996	KMT2D										KMT2D	0.402386	0.978958	5.18276	0.411035	5.29416	12.8801	0.326341	0.93779	6.3996
CBFB_ENST00000290858	0.390128	0.970366	4.04853	0.402043	4.17217	10.3774	0.325623	0.907893	4.93911	CBFB_ENST00000290858										CBFB_ENST00000290858	0.390128	0.970366	4.04853	0.402043	4.17217	10.3774	0.325623	0.907893	4.93911
SOX9	0.396824	0.924847	5.99731	0.42907	6.48465	15.1133	0.324803	0.793157	7.72284	SOX9										SOX9	0.396824	0.924847	5.99731	0.42907	6.48465	15.1133	0.324803	0.793157	7.72284
LATS1_ENST00000392273	0.383141	1.0544	2.78476	0.363374	2.64109	7.26824	0.323529	1.21843	3.12705	LATS1_ENST00000392273										LATS1_ENST00000392273	0.383141	1.0544	2.78476	0.363374	2.64109	7.26824	0.323529	1.21843	3.12705
FGFR2_ENST00000369056	0.394318	1.24532	0.7993	0.31664	0.641843	2.02704	0.323524	2.75812	0.792046	FGFR2_ENST00000369056										FGFR2_ENST00000369056	0.394318	1.24532	0.7993	0.31664	0.641843	2.02704	0.323524	2.75812	0.792046
WT1	0.391234	0.97622	5.02798	0.400765	5.15045	12.8516	0.321566	0.926317	6.16439	WT1										WT1	0.391234	0.97622	5.02798	0.400765	5.15045	12.8516	0.321566	0.926317	6.16439
KIT	0.387086	1.25446	0.42151	0.308569	0.33601	1.08893	0.320451	3.20054	0.41116	KIT										KIT	0.387086	1.25446	0.42151	0.308569	0.33601	1.08893	0.320451	3.20054	0.41116
RECQL4	0.395675	1.27416	0.568944	0.310538	0.446525	1.43791	0.320376	3.05329	0.55892	RECQL4										RECQL4	0.395675	1.27416	0.568944	0.310538	0.446525	1.43791	0.320376	3.05329	0.55892
FGFR2_ENST00000357555	0.39002	1.24246	0.842615	0.313909	0.678181	2.16044	0.319638	2.75786	0.836994	FGFR2_ENST00000357555										FGFR2_ENST00000357555	0.39002	1.24246	0.842615	0.313909	0.678181	2.16044	0.319638	2.75786	0.836994
KLHL23	0.380738	1.26086	0.346309	0.301966	0.27466	0.909574	0.319492	3.37149	0.332969	KLHL23										KLHL23	0.380738	1.26086	0.346309	0.301966	0.27466	0.909574	0.319492	3.37149	0.332969
RARA_ENST00000394081	0.39555	1.28588	0.313938	0.307609	0.244142	0.793676	0.319083	3.32437	0.306522	RARA_ENST00000394081										RARA_ENST00000394081	0.39555	1.28588	0.313938	0.307609	0.244142	0.793676	0.319083	3.32437	0.306522
MEN1	0.397018	0.990175	5.43355	0.400958	5.48747	13.6859	0.318985	0.970753	6.69393	MEN1										MEN1	0.397018	0.990175	5.43355	0.400958	5.48747	13.6859	0.318985	0.970753	6.69393
JAK1	0.387417	1.18885	1.68404	0.325875	1.41652	4.34683	0.316885	2.00785	1.74687	JAK1										JAK1	0.387417	1.18885	1.68404	0.325875	1.41652	4.34683	0.316885	2.00785	1.74687
EZH2_ENST00000350995	0.377685	1.20101	1.11576	0.314473	0.929017	2.95421	0.315954	2.37358	1.12264	EZH2_ENST00000350995										EZH2_ENST00000350995	0.377685	1.20101	1.11576	0.314473	0.929017	2.95421	0.315954	2.37358	1.12264
ATRX	0.366737	0.99311	3.34791	0.369281	3.37114	9.12892	0.313385	0.975052	3.92932	ATRX										ATRX	0.366737	0.99311	3.34791	0.369281	3.37114	9.12892	0.313385	0.975052	3.92932
DNMT3A	0.384193	1.19916	1.61055	0.320386	1.34307	4.19203	0.313232	2.096	1.66247	DNMT3A										DNMT3A	0.384193	1.19916	1.61055	0.320386	1.34307	4.19203	0.313232	2.096	1.66247
SMO	0.388868	1.2702	0.835382	0.306146	0.657676	2.14824	0.311458	2.90268	0.830363	SMO										SMO	0.388868	1.2702	0.835382	0.306146	0.657676	2.14824	0.311458	2.90268	0.830363
HNF1A_ENST00000543427	0.386579	1.2519	1.05204	0.308793	0.840349	2.7214	0.311312	2.70734	1.0541	HNF1A_ENST00000543427										HNF1A_ENST00000543427	0.386579	1.2519	1.05204	0.308793	0.840349	2.7214	0.311312	2.70734	1.0541
TSC1_ENST00000403810	0.379049	0.998826	4.87471	0.379495	4.88044	12.8604	0.311133	0.996122	5.8691	TSC1_ENST00000403810										TSC1_ENST00000403810	0.379049	0.998826	4.87471	0.379495	4.88044	12.8604	0.311133	0.996122	5.8691
PTPN11	0.373528	1.2515	0.540742	0.298465	0.432076	1.44766	0.31075	3.1038	0.527287	PTPN11										PTPN11	0.373528	1.2515	0.540742	0.298465	0.432076	1.44766	0.31075	3.1038	0.527287
HIST1H3B	0.390122	1.29439	0.572553	0.301394	0.442334	1.46763	0.310572	3.15273	0.56322	HIST1H3B										HIST1H3B	0.390122	1.29439	0.572553	0.301394	0.442334	1.46763	0.310572	3.15273	0.56322
TRAF7	0.38358	1.26607	0.75053	0.302969	0.592804	1.95665	0.309068	2.98579	0.743833	TRAF7										TRAF7	0.38358	1.26607	0.75053	0.302969	0.592804	1.95665	0.309068	2.98579	0.743833
ERBB3	0.377651	1.25954	0.66326	0.299833	0.52659	1.75628	0.307934	3.03138	0.653906	ERBB3										ERBB3	0.377651	1.25954	0.66326	0.299833	0.52659	1.75628	0.307934	3.03138	0.653906
ARID2	0.365558	0.861366	5.25381	0.424393	6.0994	14.372	0.306122	0.644926	7.11866	ARID2										ARID2	0.365558	0.861366	5.25381	0.424393	6.0994	14.372	0.306122	0.644926	7.11866
ESR1	0.378538	1.26793	0.714628	0.298548	0.563619	1.88786	0.305583	3.02522	0.706637	ESR1										ESR1	0.378538	1.26793	0.714628	0.298548	0.563619	1.88786	0.305583	3.02522	0.706637
FH	0.368229	1.21333	1.15572	0.303486	0.952516	3.13858	0.304252	2.54664	1.16322	FH										FH	0.368229	1.21333	1.15572	0.303486	0.952516	3.13858	0.304252	2.54664	1.16322
SMAD3	0.378057	1.18158	2.37365	0.31996	2.00888	6.27855	0.302804	1.8937	2.51825	SMAD3										SMAD3	0.378057	1.18158	2.37365	0.31996	2.00888	6.27855	0.302804	1.8937	2.51825
CDK8	0.364067	1.09756	2.55823	0.331707	2.33084	7.0268	0.301857	1.41929	2.81943	CDK8										CDK8	0.364067	1.09756	2.55823	0.331707	2.33084	7.0268	0.301857	1.41929	2.81943
B2M_ENST00000544417	0.365371	0.999767	4.0298	0.365456	4.03074	11.0294	0.299435	0.999252	4.87268	B2M_ENST00000544417										B2M_ENST00000544417	0.365371	0.999767	4.0298	0.365456	4.03074	11.0294	0.299435	0.999252	4.87268
RIT1	0.363028	1.21938	1.15708	0.297716	0.948911	3.18731	0.298687	2.49451	1.16623	RIT1										RIT1	0.363028	1.21938	1.15708	0.297716	0.948911	3.18731	0.298687	2.49451	1.16623
SMARCB1	0.368849	1.02387	4.79927	0.360249	4.68737	13.0115	0.295636	1.07744	5.77476	SMARCB1										SMARCB1	0.368849	1.02387	4.79927	0.360249	4.68737	13.0115	0.295636	1.07744	5.77476
TCF7L2_ENST00000352065	0.362616	1.05689	3.77094	0.343097	3.56796	10.3993	0.29371	1.20461	4.38121	TCF7L2_ENST00000352065										TCF7L2_ENST00000352065	0.362616	1.05689	3.77094	0.343097	3.56796	10.3993	0.29371	1.20461	4.38121
CTCF	0.352475	1.03107	3.96711	0.341854	3.84757	11.255	0.293609	1.12036	4.59562	CTCF										CTCF	0.352475	1.03107	3.96711	0.341854	3.84757	11.255	0.293609	1.12036	4.59562
RASA1_ENST00000456692	0.347633	0.980149	4.04048	0.354674	4.12232	11.6228	0.291556	0.932826	4.87995	RASA1_ENST00000456692										RASA1_ENST00000456692	0.347633	0.980149	4.04048	0.354674	4.12232	11.6228	0.291556	0.932826	4.87995
LRRD1	0.348024	1.14408	1.77023	0.304196	1.54729	5.08651	0.291331	1.75832	1.86542	LRRD1										LRRD1	0.348024	1.14408	1.77023	0.304196	1.54729	5.08651	0.291331	1.75832	1.86542
CDKN1A	0.364538	0.997584	5.58154	0.365421	5.59505	15.3113	0.291013	0.992588	6.89055	CDKN1A										CDKN1A	0.364538	0.997584	5.58154	0.365421	5.59505	15.3113	0.291013	0.992588	6.89055
GATA2	0.363437	1.25969	1.02932	0.288513	0.817122	2.83218	0.290887	2.91916	1.03032	GATA2										GATA2	0.363437	1.25969	1.02932	0.288513	0.817122	2.83218	0.290887	2.91916	1.03032
CDKN1B	0.354118	0.796724	7.50391	0.444468	9.41846	21.1904	0.28953	0.543665	11.0765	CDKN1B										CDKN1B	0.354118	0.796724	7.50391	0.444468	9.41846	21.1904	0.28953	0.543665	11.0765
YAP1_ENST00000282441	0.353849	1.24689	0.886253	0.283785	0.710769	2.5046	0.288769	2.88874	0.88161	YAP1_ENST00000282441										YAP1_ENST00000282441	0.353849	1.24689	0.886253	0.283785	0.710769	2.5046	0.288769	2.88874	0.88161
RAC1	0.361069	1.31435	0.152581	0.274712	0.116088	0.422583	0.288656	3.91651	0.147476	RAC1										RAC1	0.361069	1.31435	0.152581	0.274712	0.116088	0.422583	0.288656	3.91651	0.147476
LATS1_ENST00000253339	0.343603	1.0882	2.47386	0.315753	2.27334	7.19976	0.28774	1.39306	2.72577	LATS1_ENST00000253339										LATS1_ENST00000253339	0.343603	1.0882	2.47386	0.315753	2.27334	7.19976	0.28774	1.39306	2.72577
TET2_ENST00000305737	0.343309	0.876744	4.54604	0.391573	5.18514	13.2418	0.287195	0.678164	6.09675	TET2_ENST00000305737										TET2_ENST00000305737	0.343309	0.876744	4.54604	0.391573	5.18514	13.2418	0.287195	0.678164	6.09675
RUNX1	0.357586	1.13203	3.57767	0.315882	3.16041	10.005	0.286207	1.59023	3.94148	RUNX1										RUNX1	0.357586	1.13203	3.57767	0.315882	3.16041	10.005	0.286207	1.59023	3.94148
YAP1	0.342751	1.23817	1.0931	0.27682	0.882833	3.18919	0.278771	2.73725	1.09783	YAP1										YAP1	0.342751	1.23817	1.0931	0.27682	0.882833	3.18919	0.278771	2.73725	1.09783
SUZ12	0.3321	1.14214	1.95258	0.29077	1.70958	5.87949	0.277652	1.80817	2.05901	SUZ12										SUZ12	0.3321	1.14214	1.95258	0.29077	1.70958	5.87949	0.277652	1.80817	2.05901
MED12_ENST00000333646	0.341758	1.24785	1.15458	0.273877	0.925258	3.37836	0.275295	2.65331	1.16414	MED12_ENST00000333646										MED12_ENST00000333646	0.341758	1.24785	1.15458	0.273877	0.925258	3.37836	0.275295	2.65331	1.16414
EZH2	0.331544	1.21432	1.14753	0.273028	0.944998	3.46117	0.274026	2.56388	1.15659	EZH2										EZH2	0.331544	1.21432	1.14753	0.273028	0.944998	3.46117	0.274026	2.56388	1.15659
AMER1	0.33498	0.834174	7.27813	0.401571	8.72496	21.7271	0.272677	0.602461	10.391	AMER1										AMER1	0.33498	0.834174	7.27813	0.401571	8.72496	21.7271	0.272677	0.602461	10.391
TCF12	0.328603	1.16222	1.90527	0.282737	1.63933	5.79808	0.271866	1.96086	1.9958	TCF12										TCF12	0.328603	1.16222	1.90527	0.282737	1.63933	5.79808	0.271866	1.96086	1.9958
MAP2K4	0.328919	1.04538	3.95395	0.314639	3.7823	12.0211	0.270368	1.17716	4.58457	MAP2K4										MAP2K4	0.328919	1.04538	3.95395	0.314639	3.7823	12.0211	0.270368	1.17716	4.58457
PPP2R1A	0.34169	1.29406	0.78896	0.264045	0.609678	2.30899	0.268729	3.35782	0.783561	PPP2R1A										PPP2R1A	0.34169	1.29406	0.78896	0.264045	0.609678	2.30899	0.268729	3.35782	0.783561
HLA-A_ENST00000376806	0.334243	0.923431	6.17502	0.361958	6.68704	18.4746	0.268676	0.790519	8.14646	HLA-A_ENST00000376806										HLA-A_ENST00000376806	0.334243	0.923431	6.17502	0.361958	6.68704	18.4746	0.268676	0.790519	8.14646
PPP6C	0.327974	1.13246	2.59136	0.289612	2.28827	7.90113	0.267664	1.64336	2.81565	PPP6C										PPP6C	0.327974	1.13246	2.59136	0.289612	2.28827	7.90113	0.267664	1.64336	2.81565
EP300	0.320513	1.13083	2.44847	0.283431	2.1652	7.63923	0.26175	1.62173	2.6665	EP300										EP300	0.320513	1.13083	2.44847	0.283431	2.1652	7.63923	0.26175	1.62173	2.6665
MYCN	0.327474	1.28602	0.659599	0.25464	0.512897	2.0142	0.260221	3.55635	0.652305	MYCN										MYCN	0.327474	1.28602	0.659599	0.25464	0.512897	2.0142	0.260221	3.55635	0.652305
RASA1	0.312118	1.01193	4.34007	0.30844	4.28893	13.9052	0.255677	1.04229	5.2075	RASA1										RASA1	0.312118	1.01193	4.34007	0.30844	4.28893	13.9052	0.255677	1.04229	5.2075
RNF43	0.320744	1.00129	5.32552	0.320331	5.31866	16.6037	0.254398	1.00403	6.62437	RNF43										RNF43	0.320744	1.00129	5.32552	0.320331	5.31866	16.6037	0.254398	1.00403	6.62437
SMAD2_ENST00000591214	0.310224	1.04056	3.56378	0.298132	3.42487	11.4878	0.254201	1.15156	4.17491	SMAD2_ENST00000591214										SMAD2_ENST00000591214	0.310224	1.04056	3.56378	0.298132	3.42487	11.4878	0.254201	1.15156	4.17491
ERBB2	0.320068	1.31325	0.386433	0.243721	0.294256	1.20735	0.253	4.00537	0.377439	ERBB2										ERBB2	0.320068	1.31325	0.386433	0.243721	0.294256	1.20735	0.253	4.00537	0.377439
PHF6	0.298093	0.867709	4.72979	0.34354	5.4509	15.8668	0.250667	0.645729	6.40649	PHF6										PHF6	0.298093	0.867709	4.72979	0.34354	5.4509	15.8668	0.250667	0.645729	6.40649
PIK3R3	0.30175	1.18183	1.53952	0.255325	1.30266	5.10198	0.248779	2.05055	1.60118	PIK3R3										PIK3R3	0.30175	1.18183	1.53952	0.255325	1.30266	5.10198	0.248779	2.05055	1.60118
PBRM1_ENST00000356770	0.303126	0.888205	5.86443	0.34128	6.60256	19.3465	0.247863	0.69976	7.93807	PBRM1_ENST00000356770										PBRM1_ENST00000356770	0.303126	0.888205	5.86443	0.34128	6.60256	19.3465	0.247863	0.69976	7.93807
PTPRS_ENST00000262963	0.3096	1.29978	0.694983	0.238193	0.534691	2.24478	0.244194	3.65341	0.686698	PTPRS_ENST00000262963										PTPRS_ENST00000262963	0.3096	1.29978	0.694983	0.238193	0.534691	2.24478	0.244194	3.65341	0.686698
ATM	0.295023	1.08206	2.76668	0.272649	2.55686	9.37783	0.244129	1.36062	3.10375	ATM										ATM	0.295023	1.08206	2.76668	0.272649	2.55686	9.37783	0.244129	1.36062	3.10375
CHEK2	0.299475	1.19022	1.80658	0.251614	1.51786	6.03249	0.243183	2.15081	1.88724	CHEK2										CHEK2	0.299475	1.19022	1.80658	0.251614	1.51786	6.03249	0.243183	2.15081	1.88724
PBRM1_ENST00000296302	0.296572	0.891678	5.90621	0.3326	6.6237	19.9149	0.241782	0.707734	7.99257	PBRM1_ENST00000296302										PBRM1_ENST00000296302	0.296572	0.891678	5.90621	0.3326	6.6237	19.9149	0.241782	0.707734	7.99257
EGFR	0.29647	1.32351	0.301578	0.224004	0.227863	1.01723	0.23406	4.45439	0.292974	EGFR										EGFR	0.29647	1.32351	0.301578	0.224004	0.227863	1.01723	0.23406	4.45439	0.292974
SETD2	0.28025	0.940984	4.74635	0.297827	5.04403	16.9361	0.231454	0.817744	6.0648	SETD2										SETD2	0.28025	0.940984	4.74635	0.297827	5.04403	16.9361	0.231454	0.817744	6.0648
KEAP1	0.28781	1.2332	1.95082	0.233384	1.58191	6.77815	0.226087	2.47619	2.03151	KEAP1										KEAP1	0.28781	1.2332	1.95082	0.233384	1.58191	6.77815	0.226087	2.47619	2.03151
RBM10	0.280341	0.865947	6.94902	0.32374	8.02476	24.7877	0.22111	0.673557	9.94052	RBM10										RBM10	0.280341	0.865947	6.94902	0.32374	8.02476	24.7877	0.22111	0.673557	9.94052
CDC73	0.27032	1.1029	2.68254	0.245099	2.43225	9.92357	0.220427	1.45938	3.00302	CDC73										CDC73	0.27032	1.1029	2.68254	0.245099	2.43225	9.92357	0.220427	1.45938	3.00302
PBRM1	0.269267	0.861991	6.47942	0.312377	7.5168	24.0632	0.218328	0.64596	9.11338	PBRM1										PBRM1	0.269267	0.861991	6.47942	0.312377	7.5168	24.0632	0.218328	0.64596	9.11338
FOXL2	0.278165	1.33104	0.237012	0.208984	0.178066	0.852055	0.216795	4.85731	0.231275	FOXL2										FOXL2	0.278165	1.33104	0.237012	0.208984	0.178066	0.852055	0.216795	4.85731	0.231275
MAP2K1	0.277146	1.31436	0.610677	0.21086	0.464619	2.20345	0.216668	4.16689	0.601896	MAP2K1										MAP2K1	0.277146	1.31436	0.610677	0.21086	0.464619	2.20345	0.216668	4.16689	0.601896
TGFBR1	0.261211	1.11757	2.84879	0.23373	2.54909	10.9061	0.21232	1.5779	3.15321	TGFBR1										TGFBR1	0.261211	1.11757	2.84879	0.23373	2.54909	10.9061	0.21232	1.5779	3.15321
CDKN2A	0.263985	0.83323	13.9294	0.316821	16.7174	52.766	0.206096	0.600585	20.7281	CDKN2A										CDKN2A	0.263985	0.83323	13.9294	0.316821	16.7174	52.766	0.206096	0.600585	20.7281
ERBB3_ENST00000411731	0.265581	1.31163	0.955926	0.202482	0.728808	3.59938	0.205293	3.82415	0.954352	ERBB3_ENST00000411731										ERBB3_ENST00000411731	0.265581	1.31163	0.955926	0.202482	0.728808	3.59938	0.205293	3.82415	0.954352
KCNJ5	0.262089	1.33544	0.235489	0.196258	0.176339	0.898507	0.204798	5.15701	0.228822	KCNJ5										KCNJ5	0.262089	1.33544	0.235489	0.196258	0.176339	0.898507	0.204798	5.15701	0.228822
U2AF1_ENST00000380276	0.259274	1.31731	0.428804	0.196821	0.325515	1.65386	0.204725	4.66228	0.418304	U2AF1_ENST00000380276										U2AF1_ENST00000380276	0.259274	1.31731	0.428804	0.196821	0.325515	1.65386	0.204725	4.66228	0.418304
ERBB2_ENST00000541774	0.246919	1.34681	0.322012	0.183336	0.239092	1.30412	0.190927	5.26502	0.3137	ERBB2_ENST00000541774										ERBB2_ENST00000541774	0.246919	1.34681	0.322012	0.183336	0.239092	1.30412	0.190927	5.26502	0.3137
B2M	0.24129	0.998615	4.75934	0.241624	4.76594	19.7246	0.190448	0.995589	6.02054	B2M										B2M	0.24129	0.998615	4.75934	0.241624	4.76594	19.7246	0.190448	0.995589	6.02054
FGFR3	0.2471	1.35595	0.0491572	0.182234	0.036253	0.198937	0.190349	5.96781	0.0476739	FGFR3										FGFR3	0.2471	1.35595	0.0491572	0.182234	0.036253	0.198937	0.190349	5.96781	0.0476739
PIK3R1	0.235362	1.00638	4.01757	0.233869	3.99209	17.0698	0.188863	1.02132	4.98116	PIK3R1										PIK3R1	0.235362	1.00638	4.01757	0.233869	3.99209	17.0698	0.188863	1.02132	4.98116
TGFBR2	0.242792	1.17569	3.31141	0.20651	2.81657	13.6389	0.188839	1.92291	3.63815	TGFBR2										TGFBR2	0.242792	1.17569	3.31141	0.20651	2.81657	13.6389	0.188839	1.92291	3.63815
SMAD2	0.233811	0.953253	4.75153	0.245277	4.98454	20.3221	0.188145	0.858876	6.17452	SMAD2										SMAD2	0.233811	0.953253	4.75153	0.245277	4.98454	20.3221	0.188145	0.858876	6.17452
AKT1	0.240528	1.35341	0.245408	0.17772	0.181325	1.02029	0.186166	5.61249	0.237922	AKT1										AKT1	0.240528	1.35341	0.245408	0.17772	0.181325	1.02029	0.186166	5.61249	0.237922
BAP1	0.239268	0.986535	7.89405	0.242534	8.00179	32.9925	0.183605	0.958814	10.3005	BAP1										BAP1	0.239268	0.986535	7.89405	0.242534	8.00179	32.9925	0.183605	0.958814	10.3005
JAK3_ENST00000534444	0.232538	1.2748	1.84378	0.182411	1.44633	7.92894	0.178444	3.08676	1.90325	JAK3_ENST00000534444										JAK3_ENST00000534444	0.232538	1.2748	1.84378	0.182411	1.44633	7.92894	0.178444	3.08676	1.90325
MAX	0.22144	1.1958	2.20691	0.185181	1.84555	9.96618	0.174254	2.0965	2.37372	MAX										MAX	0.22144	1.1958	2.20691	0.185181	1.84555	9.96618	0.174254	2.0965	2.37372
STK11	0.225904	0.938957	8.29031	0.24059	8.82928	36.6984	0.172199	0.832599	11.4114	STK11										STK11	0.225904	0.938957	8.29031	0.24059	8.82928	36.6984	0.172199	0.832599	11.4114
ERCC2_ENST00000485403	0.223859	1.38013	0.15401	0.162202	0.111591	0.687978	0.169709	6.38025	0.149387	ERCC2_ENST00000485403										ERCC2_ENST00000485403	0.223859	1.38013	0.15401	0.162202	0.111591	0.687978	0.169709	6.38025	0.149387
TET2	0.211665	0.902381	5.33321	0.234562	5.91016	25.1965	0.169484	0.73457	7.34427	TET2										TET2	0.211665	0.902381	5.33321	0.234562	5.91016	25.1965	0.169484	0.73457	7.34427
CASP8	0.216079	1.03168	4.66258	0.209445	4.51942	21.5781	0.169278	1.10971	5.77144	CASP8										CASP8	0.216079	1.03168	4.66258	0.209445	4.51942	21.5781	0.169278	1.10971	5.77144
SRSF2	0.216626	1.35106	0.484086	0.160338	0.358302	2.23466	0.164807	5.58046	0.476443	SRSF2										SRSF2	0.216626	1.35106	0.484086	0.160338	0.358302	2.23466	0.164807	5.58046	0.476443
ARID1A	0.203891	0.684985	11.458	0.297657	16.7274	56.197	0.158329	0.400004	20.7656	ARID1A										ARID1A	0.203891	0.684985	11.458	0.297657	16.7274	56.197	0.158329	0.400004	20.7656
CASP8_ENST00000264275	0.200948	1.04077	4.40497	0.193076	4.23242	21.921	0.156923	1.14325	5.43573	CASP8_ENST00000264275										CASP8_ENST00000264275	0.200948	1.04077	4.40497	0.193076	4.23242	21.921	0.156923	1.14325	5.43573
U2AF1	0.200348	1.34397	0.369841	0.149072	0.275186	1.84599	0.155226	6.03984	0.36035	U2AF1										U2AF1	0.200348	1.34397	0.369841	0.149072	0.275186	1.84599	0.155226	6.03984	0.36035
RB1	0.190756	0.559417	10.3367	0.340991	18.4776	54.188	0.153282	0.266281	22.039	RB1										RB1	0.190756	0.559417	10.3367	0.340991	18.4776	54.188	0.153282	0.266281	22.039
MED12	0.195102	1.35603	0.487228	0.143878	0.359305	2.49729	0.150456	5.63297	0.474461	MED12										MED12	0.195102	1.35603	0.487228	0.143878	0.359305	2.49729	0.150456	5.63297	0.474461
NF2_ENST00000403999	0.188517	0.824601	8.02033	0.228616	9.72631	42.5443	0.145484	0.597018	12.4132	NF2_ENST00000403999										NF2_ENST00000403999	0.188517	0.824601	8.02033	0.228616	9.72631	42.5443	0.145484	0.597018	12.4132
APC	0.178713	0.345093	12.1684	0.517868	35.2612	68.0892	0.145187	0.127747	39.7256	APC										APC	0.178713	0.345093	12.1684	0.517868	35.2612	68.0892	0.145187	0.127747	39.7256
NFE2L2	0.178665	1.30314	0.459136	0.137103	0.352329	2.56981	0.143565	5.62296	0.445501	NFE2L2										NFE2L2	0.178665	1.30314	0.459136	0.137103	0.352329	2.56981	0.143565	5.62296	0.445501
SF3B1	0.180198	1.32601	0.239539	0.135894	0.180646	1.32931	0.143353	6.97196	0.23063	SF3B1										SF3B1	0.180198	1.32601	0.239539	0.135894	0.180646	1.32931	0.143353	6.97196	0.23063
RHOA	0.183994	1.34674	0.269272	0.136622	0.199943	1.46348	0.142219	6.93314	0.262084	RHOA										RHOA	0.183994	1.34674	0.269272	0.136622	0.199943	1.46348	0.142219	6.93314	0.262084
PIK3R1_ENST00000336483	0.174276	1.02336	3.73246	0.170298	3.64726	21.4169	0.138924	1.08212	4.6115	PIK3R1_ENST00000336483										PIK3R1_ENST00000336483	0.174276	1.02336	3.73246	0.170298	3.64726	21.4169	0.138924	1.08212	4.6115
PIK3R1_ENST00000320694	0.172684	1.02793	3.68834	0.167991	3.58811	21.359	0.137045	1.09763	4.55996	PIK3R1_ENST00000320694										PIK3R1_ENST00000320694	0.172684	1.02793	3.68834	0.167991	3.58811	21.359	0.137045	1.09763	4.55996
EIF1AX	0.167364	1.29464	0.695366	0.129275	0.537112	4.1548	0.132958	5.12494	0.685378	EIF1AX										EIF1AX	0.167364	1.29464	0.695366	0.129275	0.537112	4.1548	0.132958	5.12494	0.685378
VHL	0.172766	1.06914	4.9939	0.161594	4.67095	28.9056	0.132642	1.26221	6.10354	VHL										VHL	0.172766	1.06914	4.9939	0.161594	4.67095	28.9056	0.132642	1.26221	6.10354
PRB3	0.170754	1.46378	0.585988	0.116653	0.400324	3.43176	0.124036	5.96911	0.568737	PRB3										PRB3	0.170754	1.46378	0.585988	0.116653	0.400324	3.43176	0.124036	5.96911	0.568737
NF2	0.161671	0.573452	11.9667	0.281925	20.8678	74.0189	0.123643	0.297858	26.1589	NF2										NF2	0.161671	0.573452	11.9667	0.281925	20.8678	74.0189	0.123643	0.297858	26.1589
AR_ENST00000396043	0.159169	1.29887	1.36929	0.122545	1.05422	8.60273	0.122128	3.83326	1.39424	AR_ENST00000396043										AR_ENST00000396043	0.159169	1.29887	1.36929	0.122545	1.05422	8.60273	0.122128	3.83326	1.39424
FBXW7_ENST00000281708	0.139163	1.1122	2.90978	0.125124	2.61624	20.9092	0.111496	1.55555	3.30321	FBXW7_ENST00000281708										FBXW7_ENST00000281708	0.139163	1.1122	2.90978	0.125124	2.61624	20.9092	0.111496	1.55555	3.30321
IDH2	0.1487	1.37261	0.629847	0.108334	0.458867	4.23568	0.111305	6.78985	0.621413	IDH2										IDH2	0.1487	1.37261	0.629847	0.108334	0.458867	4.23568	0.111305	6.78985	0.621413
FBXW7_ENST00000296555	0.130948	1.12669	3.09071	0.116224	2.74318	23.6025	0.103653	1.64809	3.50393	FBXW7_ENST00000296555										FBXW7_ENST00000296555	0.130948	1.12669	3.09071	0.116224	2.74318	23.6025	0.103653	1.64809	3.50393
JAK2	0.126925	1.3231	0.429064	0.0959302	0.324287	3.38044	0.100728	7.16178	0.415441	JAK2										JAK2	0.126925	1.3231	0.429064	0.0959302	0.324287	3.38044	0.100728	7.16178	0.415441
FBXW7	0.120787	1.12058	2.87742	0.10779	2.5678	23.8223	0.0963641	1.61535	3.25901	FBXW7										FBXW7	0.120787	1.12058	2.87742	0.10779	2.5678	23.8223	0.0963641	1.61535	3.25901
RUNX1_ENST00000344691	0.125179	1.28546	2.61254	0.0973809	2.03238	20.8704	0.0930163	3.3676	2.76254	RUNX1_ENST00000344691										RUNX1_ENST00000344691	0.125179	1.28546	2.61254	0.0973809	2.03238	20.8704	0.0930163	3.3676	2.76254
GNAS	0.122945	1.37714	0.647744	0.0892754	0.470355	5.26858	0.0915764	7.65974	0.639783	GNAS										GNAS	0.122945	1.37714	0.647744	0.0892754	0.470355	5.26858	0.0915764	7.65974	0.639783
MAX_ENST00000284165	0.110059	1.21547	2.01812	0.0905491	1.66037	18.3367	0.0860068	2.44489	2.16066	MAX_ENST00000284165										MAX_ENST00000284165	0.110059	1.21547	2.01812	0.0905491	1.66037	18.3367	0.0860068	2.44489	2.16066
SPOP	0.110318	1.35341	0.645138	0.0815111	0.476677	5.848	0.0843416	6.97965	0.633887	SPOP										SPOP	0.110318	1.35341	0.645138	0.0815111	0.476677	5.848	0.0843416	6.97965	0.633887
MYD88	0.10866	1.41065	0.372795	0.0770287	0.264272	3.43083	0.0801901	10.0775	0.363705	MYD88										MYD88	0.10866	1.41065	0.372795	0.0770287	0.264272	3.43083	0.0801901	10.0775	0.363705
SMAD4	0.10239	1.07351	4.31835	0.0953788	4.02264	42.1755	0.0796955	1.30874	5.21879	SMAD4										SMAD4	0.10239	1.07351	4.31835	0.0953788	4.02264	42.1755	0.0796955	1.30874	5.21879
H3F3A	0.0939248	1.41221	0.117815	0.0665091	0.0834263	1.25436	0.0693413	14.6544	0.114474	H3F3A										H3F3A	0.0939248	1.41221	0.117815	0.0665091	0.0834263	1.25436	0.0693413	14.6544	0.114474
HRAS_ENST00000397594	0.0882213	1.40521	0.34839	0.0627817	0.247928	3.94904	0.0654268	11.6801	0.339439	HRAS_ENST00000397594										HRAS_ENST00000397594	0.0882213	1.40521	0.34839	0.0627817	0.247928	3.94904	0.0654268	11.6801	0.339439
PTEN	0.0835528	0.970625	5.81864	0.0860815	5.99473	69.6402	0.0653485	0.903029	7.72473	PTEN										PTEN	0.0835528	0.970625	5.81864	0.0860815	5.99473	69.6402	0.0653485	0.903029	7.72473
MAX_ENST00000556979	0.07659	1.22168	2.18782	0.0626925	1.79083	28.5653	0.0590012	2.48246	2.36663	MAX_ENST00000556979										MAX_ENST00000556979	0.07659	1.22168	2.18782	0.0626925	1.79083	28.5653	0.0590012	2.48246	2.36663
BRAF	0.0585923	1.41054	0.089296	0.0415388	0.063306	1.52402	0.0445188	22.0467	0.0849246	BRAF										BRAF	0.0585923	1.41054	0.089296	0.0415388	0.063306	1.52402	0.0445188	22.0467	0.0849246
CTNNB1	0.0574826	1.37049	0.329469	0.0419431	0.240403	5.73164	0.0438119	14.1394	0.320018	CTNNB1										CTNNB1	0.0574826	1.37049	0.329469	0.0419431	0.240403	5.73164	0.0438119	14.1394	0.320018
HRAS	0.0525322	1.44661	0.14032	0.036314	0.0969995	2.67113	0.0381766	22.9434	0.135629	HRAS										HRAS	0.0525322	1.44661	0.14032	0.036314	0.0969995	2.67113	0.0381766	22.9434	0.135629
TP53_ENST00000420246	0.0474865	1.21014	3.65299	0.0392406	3.01866	76.927	0.0352495	2.29039	4.12177	TP53_ENST00000420246										TP53_ENST00000420246	0.0474865	1.21014	3.65299	0.0392406	3.01866	76.927	0.0352495	2.29039	4.12177
PIK3CA	0.0432188	1.38811	0.107188	0.031135	0.0772188	2.48013	0.0334524	24.8545	0.10165	PIK3CA										PIK3CA	0.0432188	1.38811	0.107188	0.031135	0.0772188	2.48013	0.0334524	24.8545	0.10165
TP53_ENST00000455263	0.0426668	1.21952	3.60607	0.0349865	2.95695	84.5169	0.0314981	2.36813	4.06208	TP53_ENST00000455263										TP53_ENST00000455263	0.0426668	1.21952	3.60607	0.0349865	2.95695	84.5169	0.0314981	2.36813	4.06208
TP53_ENST00000413465	0.0407942	1.20771	3.58344	0.0337781	2.96713	87.842	0.030269	2.25241	4.05732	TP53_ENST00000413465										TP53_ENST00000413465	0.0407942	1.20771	3.58344	0.0337781	2.96713	87.842	0.030269	2.25241	4.05732
TP53	0.0406721	1.1872	4.38751	0.0342589	3.69568	107.875	0.0299906	2.04035	5.07608	TP53										TP53	0.0406721	1.1872	4.38751	0.0342589	3.69568	107.875	0.0299906	2.04035	5.07608
FBXW7_ENST00000393956	0.0379237	1.20751	2.47278	0.0314064	2.04783	65.2042	0.0292758	2.47894	2.69559	FBXW7_ENST00000393956										FBXW7_ENST00000393956	0.0379237	1.20751	2.47278	0.0314064	2.04783	65.2042	0.0292758	2.47894	2.69559
NRAS	0.0314795	1.40894	0.060611	0.0223426	0.0430187	1.92541	0.0240708	38.0351	0.0573582	NRAS										NRAS	0.0314795	1.40894	0.060611	0.0223426	0.0430187	1.92541	0.0240708	38.0351	0.0573582
IDH1	0.0290073	1.42162	0.0705701	0.0204044	0.0496405	2.43284	0.0218451	39.3877	0.0671548	IDH1										IDH1	0.0290073	1.42162	0.0705701	0.0204044	0.0496405	2.43284	0.0218451	39.3877	0.0671548
KRAS	0.0177326	1.36436	0.012278	0.012997	0.00899906	0.692395	0.0139404	81.9257	0.011629	KRAS										KRAS	0.0177326	1.36436	0.012278	0.012997	0.00899906	0.692395	0.0139404	81.9257	0.011629
A1BG	0.868653	1.09171	0.266282	0.795682	0.243913	0.306545	0.824362	1.35155	0.259845	A1BG				0.795682	0.243913	0.306545	0.824362	1.35155	0.259845	A1BG
A1CF	0.83159	1.04688	1.25123	0.794351	1.1952	1.50462	0.784669	1.16969	1.2668	A1CF	0.83159	1.04688	1.25123	0.794351	1.1952	1.50462	0.784669	1.16969	1.2668	A1CF
A1CF_ENST00000282641	0.851738	1.03787	1.27372	0.82066	1.22724	1.49543	0.808971	1.13354	1.29109	A1CF_ENST00000282641	0.851738	1.03787	1.27372	0.82066	1.22724	1.49543	0.808971	1.13354	1.29109	A1CF_ENST00000282641
A1CF_ENST00000373995	0.861944	1.03763	1.22281	0.830688	1.17847	1.41867	0.821467	1.13277	1.2362	A1CF_ENST00000373995	0.861944	1.03763	1.22281	0.830688	1.17847	1.41867	0.821467	1.13277	1.2362	A1CF_ENST00000373995
A2M	0.926852	1.01594	1.18824	0.912312	1.1696	1.28202	0.902613	1.05244	1.19921	A2M	0.926852	1.01594	1.18824	0.912312	1.1696	1.28202	0.902613	1.05244	1.19921	A2M
A2ML1	0.982439	1.00439	1.03729	0.978145	1.03276	1.05583	0.976077	1.01394	1.03921	A2ML1	0.982439	1.00439	1.03729	0.978145	1.03276	1.05583	0.976077	1.01394	1.03921	A2ML1
A4GALT	1.18325	0.923095	0.955914	1.28183	1.03555	0.807874	1.27957	0.796628	0.954381	A4GALT										A4GALT
AAAS	0.795994	0.998204	2.3589	0.797425	2.36315	2.96347	0.738453	0.994389	2.50989	AAAS										AAAS
AACS	1.15049	0.929169	1.1613	1.23819	1.24983	1.0094	1.2215	0.806692	1.16904	AACS										AACS
AADAC	0.878898	0.956169	2.27501	0.919187	2.3793	2.58848	0.845325	0.865376	2.43023	AADAC										AADAC
AADACL2	0.656299	1.07222	1.54178	0.612095	1.43794	2.3492	0.595646	1.32097	1.58571	AADACL2										AADACL2
AADACL4	1.17026	0.924215	1.05286	1.26622	1.1392	0.899682	1.25808	0.797905	1.05476	AADACL4										AADACL4
AAK1	0.970992	1.05615	0.394402	0.919371	0.373434	0.406185	0.961062	1.20405	0.381958	AAK1	0.970992	1.05615	0.394402	0.919371	0.373434	0.406185	0.961062	1.20405	0.381958	AAK1
AARS	0.995592	0.999282	1.04641	0.996307	1.04717	1.05105	0.993909	0.99772	1.04828	AARS	0.995592	0.999282	1.04641	0.996307	1.04717	1.05105	0.993909	0.99772	1.04828	AARS
AARS2	1.06589	0.977209	0.918235	1.09075	0.939651	0.861475	1.09441	0.932679	0.915142	AARS2	1.06589	0.977209	0.918235	1.09075	0.939651	0.861475	1.09441	0.932679	0.915142	AARS2
AARSD1	0.610295	1.15177	0.970324	0.529875	0.842462	1.58993	0.533961	1.76546	0.969265	AARSD1										AARSD1
AASDH	0.818932	1.01307	1.60789	0.808369	1.58715	1.9634	0.776555	1.04737	1.66524	AASDH	0.818932	1.01307	1.60789	0.808369	1.58715	1.9634	0.776555	1.04737	1.66524	AASDH
AASDH_ENST00000502617	0.649421	1.05494	1.82291	0.615602	1.72798	2.80698	0.58703	1.22459	1.90782	AASDH_ENST00000502617										AASDH_ENST00000502617
AASS	0.86503	1.01832	1.48825	0.849468	1.46148	1.72046	0.82801	1.06589	1.52096	AASS	0.86503	1.01832	1.48825	0.849468	1.46148	1.72046	0.82801	1.06589	1.52096	AASS
AATK	0.975355	1.02995	0.570071	0.946996	0.553495	0.584475	0.96619	1.10349	0.56205	AATK	0.975355	1.02995	0.570071	0.946996	0.553495	0.584475	0.96619	1.10349	0.56205	AATK
ABAT	0.610041	1.19289	0.469382	0.511398	0.393483	0.769426	0.527323	2.00638	0.460388	ABAT										ABAT	0.610041	1.19289	0.469382
ABCA1	0.815768	1.07618	0.968891	0.75802	0.900303	1.1877	0.762438	1.28715	0.967567	ABCA1	0.815768	1.07618	0.968891	0.75802	0.900303	1.1877	0.762438	1.28715	0.967567	ABCA1
ABCA10	0.835327	1.00723	1.64242	0.829328	1.63063	1.9662	0.794299	1.02521	1.70397	ABCA10	0.835327	1.00723	1.64242	0.829328	1.63063	1.9662	0.794299	1.02521	1.70397	ABCA10
ABCA12	0.857802	1.05551	0.961857	0.812687	0.91127	1.1213	0.817205	1.2083	0.960084	ABCA12	0.857802	1.05551	0.961857	0.812687	0.91127	1.1213	0.817205	1.2083	0.960084	ABCA12
ABCA12_ENST00000389661	0.847853	1.05484	1.02612	0.803775	0.972775	1.21026	0.805105	1.20654	1.02739	ABCA12_ENST00000389661	0.847853	1.05484	1.02612	0.803775	0.972775	1.21026	0.805105	1.20654	1.02739	ABCA12_ENST00000389661
ABCA13	0.964425	1.02286	0.863839	0.942874	0.844537	0.895704	0.953059	1.07975	0.857502	ABCA13	0.964425	1.02286	0.863839	0.942874	0.844537	0.895704	0.953059	1.07975	0.857502	ABCA13
ABCA2	1.10854	0.975109	0.559131	1.13683	0.573404	0.504388	1.16052	0.927391	0.55062	ABCA2	1.10854	0.975109	0.559131	1.13683	0.573404	0.504388	1.16052	0.927391	0.55062	ABCA2
ABCA3	1.04309	0.972668	1.16754	1.0724	1.20035	1.11931	1.06202	0.92089	1.17458	ABCA3	1.04309	0.972668	1.16754	1.0724	1.20035	1.11931	1.06202	0.92089	1.17458	ABCA3
ABCA4	0.958427	0.985532	1.5313	0.972497	1.55378	1.59772	0.942667	0.957105	1.56666	ABCA4	0.958427	0.985532	1.5313	0.972497	1.55378	1.59772	0.942667	0.957105	1.56666	ABCA4
ABCA5	0.699859	1.04116	1.69921	0.672193	1.63204	2.42793	0.643375	1.16362	1.77105	ABCA5				0.672193	1.63204	2.42793	0.643375	1.16362	1.77105	ABCA5
ABCA6	0.827115	1.01694	1.59312	0.81334	1.56659	1.92612	0.78242	1.05861	1.64717	ABCA6	0.827115	1.01694	1.59312	0.81334	1.56659	1.92612	0.78242	1.05861	1.64717	ABCA6
ABCA7	0.93719	1.01217	1.32623	0.925917	1.31028	1.41511	0.913223	1.03827	1.3405	ABCA7	0.93719	1.01217	1.32623	0.925917	1.31028	1.41511	0.913223	1.03827	1.3405	ABCA7
ABCA8	1.19007	0.970421	0.43819	1.22635	0.451546	0.368204	1.27316	0.909278	0.425629	ABCA8										ABCA8
ABCA8_ENST00000430352	1.19214	0.952739	0.673188	1.25128	0.706582	0.564687	1.27645	0.860429	0.661804	ABCA8_ENST00000430352										ABCA8_ENST00000430352
ABCA9	0.858125	1.03607	1.20547	0.828254	1.16351	1.40477	0.818643	1.12776	1.21966	ABCA9	0.858125	1.03607	1.20547	0.828254	1.16351	1.40477	0.818643	1.12776	1.21966	ABCA9
ABCB1	0.758059	1.06769	1.35998	0.709997	1.27375	1.79402	0.698459	1.26206	1.38322	ABCB1	0.758059	1.06769	1.35998	0.709997	1.27375	1.79402	0.698459	1.26206	1.38322	ABCB1
ABCB10	0.655203	1.14037	1.2201	0.574551	1.06992	1.86218	0.572596	1.59659	1.22976	ABCB10										ABCB10
ABCB11	0.835277	1.02439	1.52195	0.81539	1.48572	1.82209	0.790725	1.08536	1.56295	ABCB11	0.835277	1.02439	1.52195	0.81539	1.48572	1.82209	0.790725	1.08536	1.56295	ABCB11
ABCB4	0.881447	0.99412	1.75637	0.88666	1.76676	1.9926	0.845096	0.981471	1.82454	ABCB4				0.88666	1.76676	1.9926	0.845096	0.981471	1.82454	ABCB4
ABCB5	0.673897	1.07964	1.54978	0.624186	1.43546	2.29973	0.607091	1.32513	1.59431	ABCB5										ABCB5
ABCB6	1.09842	0.968968	0.811627	1.1336	0.83762	0.738901	1.14441	0.911831	0.805094	ABCB6	1.09842	0.968968	0.811627	1.1336	0.83762	0.738901	1.14441	0.911831	0.805094	ABCB6
ABCB7	0.948538	1.02454	0.905827	0.92582	0.884133	0.954972	0.932455	1.08771	0.901733	ABCB7	0.948538	1.02454	0.905827	0.92582	0.884133	0.954972	0.932455	1.08771	0.901733	ABCB7
ABCB8	1.1517	0.932627	1.06738	1.2349	1.14449	0.926782	1.22691	0.815778	1.06977	ABCB8										ABCB8
ABCB8_ENST00000542328	1.14663	0.948887	0.737437	1.20839	0.77716	0.643136	1.21994	0.856245	0.73147	ABCB8_ENST00000542328										ABCB8_ENST00000542328
ABCB9	1.0408	0.968204	1.2774	1.07498	1.31935	1.22733	1.05888	0.909154	1.28982	ABCB9	1.0408	0.968204	1.2774	1.07498	1.31935	1.22733	1.05888	0.909154	1.28982	ABCB9
ABCC1	1.07237	0.959434	1.15015	1.11771	1.19878	1.07253	1.10543	0.88703	1.1573	ABCC1	1.07237	0.959434	1.15015	1.11771	1.19878	1.07253	1.10543	0.88703	1.1573	ABCC1
ABCC1_ENST00000399408	1.09839	0.941085	1.28962	1.16715	1.37036	1.1741	1.14531	0.840682	1.30387	ABCC1_ENST00000399408				1.16715	1.37036	1.1741	1.14531	0.840682	1.30387	ABCC1_ENST00000399408
ABCC10	1.09914	0.96873	0.748317	1.13462	0.772472	0.680822	1.14848	0.913139	0.741148	ABCC10	1.09914	0.96873	0.748317	1.13462	0.772472	0.680822	1.14848	0.913139	0.741148	ABCC10
ABCC11	0.935081	1.02553	1.03058	0.911806	1.00493	1.10213	0.911559	1.08331	1.03187	ABCC11	0.935081	1.02553	1.03058	0.911806	1.00493	1.10213	0.911559	1.08331	1.03187	ABCC11
ABCC12	1.08091	0.989673	0.621946	1.09219	0.628436	0.575389	1.11511	0.967929	0.612275	ABCC12	1.08091	0.989673	0.621946	1.09219	0.628436	0.575389	1.11511	0.967929	0.612275	ABCC12
ABCC2	0.847698	1.08232	0.69213	0.783227	0.63949	0.816481	0.800733	1.30946	0.682509	ABCC2	0.847698	1.08232	0.69213	0.783227	0.63949	0.816481	0.800733	1.30946	0.682509	ABCC2
ABCC3	0.976982	1.03426	0.557252	0.944623	0.538796	0.570381	0.967644	1.11091	0.5481	ABCC3	0.976982	1.03426	0.557252	0.944623	0.538796	0.570381	0.967644	1.11091	0.5481	ABCC3
ABCC3_ENST00000427699	1.1718	0.961426	0.328321	1.21881	0.341493	0.280185	1.26535	0.894429	0.319597	ABCC3_ENST00000427699										ABCC3_ENST00000427699
ABCC4	0.826186	1.10053	0.541579	0.750715	0.492106	0.655517	0.778719	1.41388	0.528184	ABCC4	0.826186	1.10053	0.541579	0.750715	0.492106	0.655517	0.778719	1.41388	0.528184	ABCC4
ABCC4_ENST00000376887	0.821814	1.10179	0.546754	0.74589	0.496241	0.665301	0.77348	1.42055	0.533379	ABCC4_ENST00000376887				0.74589	0.496241	0.665301	0.77348	1.42055	0.533379	ABCC4_ENST00000376887
ABCC5	1.11522	0.935008	1.30803	1.19274	1.39895	1.17289	1.16734	0.820888	1.32473	ABCC5							1.16734	0.820888	1.32473	ABCC5
ABCC6	1.18995	0.904531	1.24247	1.31554	1.37361	1.04414	1.28928	0.756187	1.25475	ABCC6										ABCC6
ABCC8	1.08263	0.967021	0.924931	1.11955	0.956474	0.854338	1.12198	0.90706	0.922429	ABCC8	1.08263	0.967021	0.924931	1.11955	0.956474	0.854338	1.12198	0.90706	0.922429	ABCC8
ABCC9	0.842935	1.04493	1.17431	0.806692	1.12382	1.39313	0.800562	1.16841	1.18432	ABCC9	0.842935	1.04493	1.17431	0.806692	1.12382	1.39313	0.800562	1.16841	1.18432	ABCC9
ABCC9_ENST00000261201	0.869447	1.03537	1.17834	0.839744	1.13808	1.35528	0.832747	1.12955	1.18844	ABCC9_ENST00000261201	0.869447	1.03537	1.17834	0.839744	1.13808	1.35528	0.832747	1.12955	1.18844	ABCC9_ENST00000261201
ABCD1	0.87582	1.05456	0.988276	0.830509	0.937147	1.1284	0.833366	1.18621	0.98781	ABCD1	0.87582	1.05456	0.988276	0.830509	0.937147	1.1284	0.833366	1.18621	0.98781	ABCD1
ABCD2	0.641857	1.13243	0.915482	0.566797	0.808425	1.4263	0.574148	1.64592	0.911405	ABCD2										ABCD2
ABCD3	0.600657	1.16115	0.773331	0.517297	0.666007	1.28748	0.530669	1.83502	0.762934	ABCD3										ABCD3
ABCD4	0.930031	1.08031	0.189354	0.860895	0.175278	0.2036	0.904451	1.2914	0.18292	ABCD4							0.904451	1.2914	0.18292	ABCD4
ABCE1	0.584431	1.08638	1.83538	0.53796	1.68944	3.14046	0.515805	1.3783	1.9146	ABCE1										ABCE1
ABCF1	0.66872	1.15481	0.751046	0.579072	0.650361	1.12311	0.593665	1.69445	0.741153	ABCF1										ABCF1
ABCF2	1.05684	0.904969	2.15192	1.16782	2.3779	2.03618	1.08025	0.752093	2.26817	ABCF2										ABCF2
ABCF3	0.798996	1.09068	0.911316	0.732565	0.835545	1.14058	0.739323	1.34212	0.90799	ABCF3	0.798996	1.09068	0.911316	0.732565	0.835545	1.14058	0.739323	1.34212	0.90799	ABCF3
ABCG1	1.02764	1.00757	0.605938	1.01992	0.601385	0.58964	1.03937	1.0238	0.597813	ABCG1	1.02764	1.00757	0.605938	1.01992	0.601385	0.58964	1.03937	1.0238	0.597813	ABCG1
ABCG1_ENST00000398437	1.13857	0.976973	0.334481	1.16541	0.342365	0.293773	1.20538	0.931742	0.326365	ABCG1_ENST00000398437				1.16541	0.342365	0.293773				ABCG1_ENST00000398437
ABCG1_ENST00000398457	1.0327	1.01408	0.44892	1.01836	0.442688	0.434706	1.04664	1.04477	0.440264	ABCG1_ENST00000398457	1.0327	1.01408	0.44892	1.01836	0.442688	0.434706	1.04664	1.04477	0.440264	ABCG1_ENST00000398457
ABCG2	0.764685	1.08244	1.16179	0.706445	1.07331	1.51931	0.703299	1.31877	1.17062	ABCG2	0.764685	1.08244	1.16179	0.706445	1.07331	1.51931	0.703299	1.31877	1.17062	ABCG2
ABCG4	1.01371	1.02552	0.313887	0.988484	0.306076	0.309642	1.01961	1.08214	0.30716	ABCG4				0.988484	0.306076	0.309642	1.01961	1.08214	0.30716	ABCG4
ABCG5	1.10783	0.956565	0.946864	1.15813	0.989858	0.854702	1.15869	0.876804	0.945104	ABCG5	1.10783	0.956565	0.946864	1.15813	0.989858	0.854702	1.15869	0.876804	0.945104	ABCG5
ABCG8	1.26755	0.873689	1.15338	1.4508	1.32013	0.909928	1.42769	0.696021	1.15995	ABCG8										ABCG8
ABHD16A	0.708495	1.11282	1.18882	0.636666	1.06829	1.67795	0.634068	1.44376	1.19893	ABHD16A										ABHD16A
ABHD2	0.915344	1.09818	0	0.833508	0	0	0.886382	1.38518	0	ABHD2										ABHD2
ABHD8	1.16612	0.927234	1.02643	1.25763	1.10698	0.88021	1.25204	0.803978	1.02726	ABHD8										ABHD8
ABI3	1.18556	0.964785	0	1.22883	0	0	1.28526	0.899245	0	ABI3										ABI3
ABI3BP	0.808109	1.07426	0.933984	0.752246	0.86942	1.15577	0.758652	1.29705	0.930867	ABI3BP	0.808109	1.07426	0.933984	0.752246	0.86942	1.15577	0.758652	1.29705	0.930867	ABI3BP
ABI3BP_ENST00000471714	0.817968	1.07772	0.7984	0.758977	0.74082	0.976077	0.770802	1.3223	0.791008	ABI3BP_ENST00000471714	0.817968	1.07772	0.7984	0.758977	0.74082	0.976077	0.770802	1.3223	0.791008	ABI3BP_ENST00000471714
ABL1	0.647071	1.08458	2.16315	0.596609	1.99446	3.34299	0.568072	1.32371	2.26208	ABL1										ABL1
ABL1_ENST00000318560	0.632579	1.07967	2.4033	0.585902	2.22596	3.79921	0.552096	1.29992	2.53523	ABL1_ENST00000318560										ABL1_ENST00000318560
ABL2	1.03434	0.92443	1.98131	1.1189	2.14328	1.91553	1.0474	0.791395	2.07458	ABL2										ABL2
ABL2_ENST00000392043	1.06958	0.911337	1.74224	1.17364	1.91175	1.6289	1.09623	0.764772	1.82472	ABL2_ENST00000392043							1.09623	0.764772	1.82472	ABL2_ENST00000392043
ABL2_ENST00000512653	1.07936	0.902893	2.03524	1.19545	2.25413	1.88559	1.11093	0.741388	2.13876	ABL2_ENST00000512653										ABL2_ENST00000512653
ABLIM1	0.810803	1.08829	0.726446	0.745024	0.667511	0.895959	0.75975	1.36222	0.717622	ABLIM1	0.810803	1.08829	0.726446	0.745024	0.667511	0.895959	0.75975	1.36222	0.717622	ABLIM1
ABLIM1_ENST00000392952	0.504212	1.17943	1.06564	0.427505	0.903519	2.11347	0.430129	1.99683	1.06909	ABLIM1_ENST00000392952										ABLIM1_ENST00000392952	0.504212	1.17943	1.06564
ABLIM2	1.012	0.972622	1.37543	1.04048	1.41414	1.35912	1.01658	0.917867	1.39801	ABLIM2	1.012	0.972622	1.37543	1.04048	1.41414	1.35912	1.01658	0.917867	1.39801	ABLIM2
ABLIM2_ENST00000361737	1.06756	0.945257	1.44401	1.12938	1.52764	1.35263	1.09546	0.845293	1.47313	ABLIM2_ENST00000361737				1.12938	1.52764	1.35263	1.09546	0.845293	1.47313	ABLIM2_ENST00000361737
ABLIM3	0.739098	1.11026	0.930078	0.665701	0.837715	1.2584	0.673047	1.44552	0.926748	ABLIM3				0.665701	0.837715	1.2584	0.673047	1.44552	0.926748	ABLIM3
ABLIM3_ENST00000504238	0.747313	1.08939	1.16399	0.685993	1.06848	1.55756	0.682852	1.34359	1.17388	ABLIM3_ENST00000504238	0.747313	1.08939	1.16399	0.685993	1.06848	1.55756	0.682852	1.34359	1.17388	ABLIM3_ENST00000504238
ABR	0.994196	1.02346	0.630669	0.971404	0.616211	0.634351	0.991843	1.07508	0.621572	ABR	0.994196	1.02346	0.630669	0.971404	0.616211	0.634351	0.991843	1.07508	0.621572	ABR
ABR_ENST00000291107	0.970146	1.02764	0.73903	0.944054	0.719154	0.761772	0.958344	1.08884	0.731574	ABR_ENST00000291107	0.970146	1.02764	0.73903	0.944054	0.719154	0.761772	0.958344	1.08884	0.731574	ABR_ENST00000291107
ABRA	1.1377	0.988036	0.467826	1.15148	0.473491	0.411204	1.19369	0.961715	0.455054	ABRA				1.15148	0.473491	0.411204				ABRA
ABTB1	1.02732	1.01065	0.5566	1.01649	0.550737	0.541801	1.03861	1.0342	0.548074	ABTB1	1.02732	1.01065	0.5566	1.01649	0.550737	0.541801	1.03861	1.0342	0.548074	ABTB1
ABTB2	0.714042	1.13415	0.685774	0.629585	0.604661	0.960412	0.641517	1.59506	0.678337	ABTB2							0.641517	1.59506	0.678337	ABTB2
ACACB	0.901427	1.04433	0.94193	0.863167	0.901951	1.04493	0.867653	1.15242	0.939786	ACACB	0.901427	1.04433	0.94193	0.863167	0.901951	1.04493	0.867653	1.15242	0.939786	ACACB
ACAD10	1.09736	0.935733	1.41006	1.17273	1.5069	1.28495	1.13926	0.821565	1.43592	ACAD10				1.17273	1.5069	1.28495	1.13926	0.821565	1.43592	ACAD10
ACAD11	0.871903	1.09376	0.399597	0.797162	0.365343	0.458305	0.835988	1.38924	0.386156	ACAD11	0.871903	1.09376	0.399597	0.797162	0.365343	0.458305	0.835988	1.38924	0.386156	ACAD11
ACAD9	0.783957	1.10246	0.765156	0.711095	0.694042	0.976018	0.721545	1.40986	0.758921	ACAD9				0.711095	0.694042	0.976018	0.721545	1.40986	0.758921	ACAD9
ACADS	0.649164	1.18225	0.283561	0.549091	0.239848	0.436809	0.569808	1.9386	0.276537	ACADS										ACADS	0.649164	1.18225	0.283561
ACAN	0.933803	1.0459	0.626207	0.892826	0.598728	0.670598	0.911556	1.16691	0.61724	ACAN	0.933803	1.0459	0.626207	0.892826	0.598728	0.670598	0.911556	1.16691	0.61724	ACAN
ACAP1	1.06971	0.939729	1.57528	1.13831	1.67631	1.47263	1.10004	0.833179	1.61074	ACAP1				1.13831	1.67631	1.47263	1.10004	0.833179	1.61074	ACAP1
ACAP2	0.901332	0.929197	2.24132	0.970012	2.41211	2.48668	0.875367	0.791926	2.43	ACAP2										ACAP2
ACAP3	0.850717	1.05863	1.04396	0.803599	0.986137	1.22715	0.804141	1.21369	1.04563	ACAP3	0.850717	1.05863	1.04396	0.803599	0.986137	1.22715	0.804141	1.21369	1.04563	ACAP3
ACBD3	0.941717	1.00792	1.0976	0.934318	1.08898	1.16553	0.924531	1.02424	1.10832	ACBD3	0.941717	1.00792	1.0976	0.934318	1.08898	1.16553	0.924531	1.02424	1.10832	ACBD3
ACBD5	0.993477	1.03909	0.563197	0.956102	0.542009	0.566895	0.991614	1.15246	0.547735	ACBD5	0.993477	1.03909	0.563197	0.956102	0.542009	0.566895	0.991614	1.15246	0.547735	ACBD5
ACBD5_ENST00000375888	1.03295	1.04082	0.404166	0.992443	0.388316	0.391273	1.04287	1.15932	0.389018	ACBD5_ENST00000375888	1.03295	1.04082	0.404166	0.992443	0.388316	0.391273	1.04287	1.15932	0.389018	ACBD5_ENST00000375888
ACCS	0.854717	1.10655	0.224536	0.772417	0.202916	0.262702	0.809876	1.43439	0.217151	ACCS							0.809876	1.43439	0.217151	ACCS
ACCSL	0.775673	1.09886	0.857809	0.705892	0.780639	1.10589	0.714643	1.39772	0.8527	ACCSL	0.775673	1.09886	0.857809	0.705892	0.780639	1.10589	0.714643	1.39772	0.8527	ACCSL
ACD	0.874502	1.09081	0.214031	0.801701	0.196213	0.244746	0.833899	1.36056	0.208165	ACD							0.833899	1.36056	0.208165	ACD
ACE	0.884783	1.07586	0.607323	0.822394	0.564498	0.686409	0.846377	1.27254	0.595865	ACE	0.884783	1.07586	0.607323	0.822394	0.564498	0.686409	0.846377	1.27254	0.595865	ACE
ACE_ENST00000290863	0.922874	1.04476	0.805472	0.883338	0.770965	0.872786	0.896094	1.15233	0.79819	ACE_ENST00000290863	0.922874	1.04476	0.805472	0.883338	0.770965	0.872786	0.896094	1.15233	0.79819	ACE_ENST00000290863
ACE_ENST00000428043	0.6834	1.18615	0.253459	0.57615	0.213682	0.370879	0.607794	1.90885	0.244355	ACE_ENST00000428043										ACE_ENST00000428043	0.6834	1.18615	0.253459
ACE2	0.970892	1.01867	0.895126	0.953094	0.878716	0.921962	0.962012	1.06536	0.88938	ACE2	0.970892	1.01867	0.895126	0.953094	0.878716	0.921962	0.962012	1.06536	0.88938	ACE2
ACHE	0.9495	1.01246	1.17987	0.937819	1.16535	1.24262	0.930104	1.039	1.18773	ACHE	0.9495	1.01246	1.17987	0.937819	1.16535	1.24262	0.930104	1.039	1.18773	ACHE
ACHE_ENST00000412389	0.9109	1.02721	1.1834	0.886775	1.15206	1.29916	0.879304	1.08807	1.19247	ACHE_ENST00000412389	0.9109	1.02721	1.1834	0.886775	1.15206	1.29916	0.879304	1.08807	1.19247	ACHE_ENST00000412389
ACIN1	0.802851	1.02418	1.64466	0.783896	1.60583	2.04852	0.752616	1.08415	1.704	ACIN1	0.802851	1.02418	1.64466	0.783896	1.60583	2.04852	0.752616	1.08415	1.704	ACIN1
ACIN1_ENST00000338631	0.879496	0.988241	1.85039	0.889961	1.87241	2.10392	0.843457	0.962852	1.93074	ACIN1_ENST00000338631				0.889961	1.87241	2.10392	0.843457	0.962852	1.93074	ACIN1_ENST00000338631
ACKR3	1.22749	0.935336	0.317435	1.31236	0.339381	0.258605	1.36055	0.830256	0.309212	ACKR3										ACKR3
ACLY	0.986381	0.989866	1.31702	0.996479	1.3305	1.3352	0.981089	0.968783	1.33188	ACLY	0.986381	0.989866	1.31702	0.996479	1.3305	1.3352	0.981089	0.968783	1.33188	ACLY
ACMSD	0.71019	1.12503	0.751639	0.631261	0.668104	1.05836	0.644748	1.57015	0.742608	ACMSD							0.644748	1.57015	0.742608	ACMSD
ACO1	0.995132	0.989819	1.2089	1.00537	1.22134	1.21482	0.993321	0.968112	1.21948	ACO1	0.995132	0.989819	1.2089	1.00537	1.22134	1.21482	0.993321	0.968112	1.21948	ACO1
ACO1_ENST00000379923	0.997043	0.987332	1.23875	1.00984	1.25465	1.24243	0.99594	0.960533	1.25116	ACO1_ENST00000379923	0.997043	0.987332	1.23875	1.00984	1.25465	1.24243	0.99594	0.960533	1.25116	ACO1_ENST00000379923
ACO2	0.694081	1.08683	1.95115	0.638627	1.79526	2.81112	0.615052	1.3198	2.0186	ACO2										ACO2
ACOT11	1.02329	1.01297	0.605993	1.01019	0.598233	0.5922	1.0328	1.04136	0.596442	ACOT11	1.02329	1.01297	0.605993	1.01019	0.598233	0.5922	1.0328	1.04136	0.596442	ACOT11
ACOT12	0.673305	1.05046	2.05608	0.640959	1.95731	3.05372	0.608529	1.20042	2.15587	ACOT12										ACOT12
ACOX1	1.02681	1.00052	0.815414	1.02627	0.814988	0.794123	1.03686	1.00171	0.809103	ACOX1	1.02681	1.00052	0.815414	1.02627	0.814988	0.794123	1.03686	1.00171	0.809103	ACOX1
ACOX1_ENST00000301608	1.07369	0.984148	0.795411	1.09099	0.808223	0.740818	1.10317	0.950357	0.788295	ACOX1_ENST00000301608	1.07369	0.984148	0.795411	1.09099	0.808223	0.740818	1.10317	0.950357	0.788295	ACOX1_ENST00000301608
ACOX2	0.931789	1.02041	1.10793	0.913151	1.08577	1.18903	0.908152	1.06609	1.11379	ACOX2	0.931789	1.02041	1.10793	0.913151	1.08577	1.18903	0.908152	1.06609	1.11379	ACOX2
ACOX3	1.10086	0.980165	0.611773	1.12314	0.624153	0.555721	1.14687	0.941203	0.602187	ACOX3	1.10086	0.980165	0.611773	1.12314	0.624153	0.555721	1.14687	0.941203	0.602187	ACOX3
ACOXL	0.977646	1.02131	0.792199	0.957251	0.775672	0.810312	0.969288	1.07013	0.785408	ACOXL	0.977646	1.02131	0.792199	0.957251	0.775672	0.810312	0.969288	1.07013	0.785408	ACOXL
ACPP	0.88465	1.04531	0.984625	0.846305	0.941947	1.11301	0.849606	1.16092	0.98384	ACPP	0.88465	1.04531	0.984625	0.846305	0.941947	1.11301	0.849606	1.16092	0.98384	ACPP
ACRBP	1.28615	0.845617	1.55876	1.52096	1.84335	1.21196	1.43091	0.634055	1.6113	ACRBP										ACRBP	1.28615	0.845617	1.55876	1.52096	1.84335	1.21196
ACSBG1	0.839867	1.02829	1.56713	0.81676	1.52402	1.86593	0.790683	1.09245	1.6105	ACSBG1	0.839867	1.02829	1.56713	0.81676	1.52402	1.86593	0.790683	1.09245	1.6105	ACSBG1
ACSBG2	0.976075	0.970369	1.61509	1.00588	1.66441	1.65468	0.967214	0.912989	1.66158	ACSBG2	0.976075	0.970369	1.61509	1.00588	1.66441	1.65468	0.967214	0.912989	1.66158	ACSBG2
ACSF2	1.08073	0.947	1.33579	1.14122	1.41055	1.23601	1.11661	0.852357	1.35394	ACSF2				1.14122	1.41055	1.23601	1.11661	0.852357	1.35394	ACSF2
ACSF3	0.68332	1.14905	0.71099	0.594683	0.618764	1.04049	0.607653	1.67312	0.702489	ACSF3										ACSF3
ACSL1	0.883631	1.01095	1.50891	0.87406	1.49257	1.70763	0.848305	1.03634	1.54633	ACSL1	0.883631	1.01095	1.50891	0.87406	1.49257	1.70763	0.848305	1.03634	1.54633	ACSL1
ACSL3	0.606522	1.08893	1.66778	0.556989	1.53158	2.74974	0.537299	1.37647	1.7311	ACSL3										ACSL3
ACSL4	0.987925	0.919331	2.35783	1.07461	2.56473	2.38665	0.983943	0.770826	2.51544	ACSL4										ACSL4
ACSL5	0.612753	1.15311	1.05742	0.531394	0.917022	1.72569	0.534181	1.70599	1.06033	ACSL5										ACSL5
ACSL6	0.854578	1.0315	1.41759	0.82848	1.37429	1.65881	0.810061	1.10611	1.44542	ACSL6	0.854578	1.0315	1.41759	0.82848	1.37429	1.65881	0.810061	1.10611	1.44542	ACSL6
ACSM1	1.15791	0.938692	0.963248	1.23353	1.02616	0.831888	1.23133	0.832134	0.961402	ACSM1										ACSM1
ACSM2A	0.844739	1.00293	1.82973	0.842268	1.82438	2.16603	0.798885	1.00928	1.90979	ACSM2A				0.842268	1.82438	2.16603	0.798885	1.00928	1.90979	ACSM2A
ACSM2B	0.681039	1.08272	1.6192	0.629005	1.49548	2.37754	0.608966	1.31485	1.67189	ACSM2B										ACSM2B
ACSM3	0.756342	1.06332	1.3133	0.7113	1.23509	1.73638	0.699629	1.24474	1.33685	ACSM3	0.756342	1.06332	1.3133	0.7113	1.23509	1.73638	0.699629	1.24474	1.33685	ACSM3
ACSM4	0.775708	1.09678	0.810711	0.707263	0.739177	1.04512	0.719952	1.40354	0.802676	ACSM4	0.775708	1.09678	0.810711	0.707263	0.739177	1.04512	0.719952	1.40354	0.802676	ACSM4
ACSM5	0.738373	1.09771	1.13926	0.672646	1.03785	1.54293	0.671139	1.38571	1.14641	ACSM5	0.738373	1.09771	1.13926	0.672646	1.03785	1.54293	0.671139	1.38571	1.14641	ACSM5
ACSS1	0.964448	0.989686	1.49718	0.974499	1.51278	1.55237	0.950905	0.968515	1.5243	ACSS1	0.964448	0.989686	1.49718	0.974499	1.51278	1.55237	0.950905	0.968515	1.5243	ACSS1
ACSS1_ENST00000537502	0.965045	0.985025	1.58062	0.979716	1.60465	1.63787	0.951855	0.954452	1.61428	ACSS1_ENST00000537502	0.965045	0.985025	1.58062	0.979716	1.60465	1.63787	0.951855	0.954452	1.61428	ACSS1_ENST00000537502
ACSS2	0.920388	1.05873	0.576197	0.869333	0.544235	0.626037	0.894152	1.21473	0.565044	ACSS2	0.920388	1.05873	0.576197	0.869333	0.544235	0.626037	0.894152	1.21473	0.565044	ACSS2
ACSS3	0.788969	1.10359	0.621114	0.714908	0.562809	0.787247	0.735143	1.44603	0.609785	ACSS3				0.714908	0.562809	0.787247	0.735143	1.44603	0.609785	ACSS3
ACTA1	1.23973	0.923295	0.391949	1.34273	0.424511	0.316156	1.38105	0.800302	0.383787	ACTA1										ACTA1
ACTB	0.839501	1.09287	0.432787	0.768158	0.396008	0.515529	0.788475	1.36509	0.425224	ACTB	0.839501	1.09287	0.432787	0.768158	0.396008	0.515529	0.788475	1.36509	0.425224	ACTB
ACTBL2	0.814555	1.05696	1.33718	0.770661	1.26513	1.64161	0.760932	1.21015	1.35371	ACTBL2	0.814555	1.05696	1.33718	0.770661	1.26513	1.64161	0.760932	1.21015	1.35371	ACTBL2
ACTC1	0.812919	1.10978	0.29646	0.732506	0.267134	0.364685	0.758106	1.46427	0.289459	ACTC1				0.732506	0.267134	0.364685	0.758106	1.46427	0.289459	ACTC1
ACTG1	0.613293	1.15389	1.19037	0.531499	1.03161	1.94094	0.530664	1.70493	1.19877	ACTG1										ACTG1
ACTG2	1.09038	0.947442	1.32671	1.15087	1.4003	1.21674	1.12978	0.849066	1.34197	ACTG2				1.15087	1.4003	1.21674	1.12978	0.849066	1.34197	ACTG2
ACTL6B	1.10574	0.903343	1.90838	1.22406	2.11257	1.72588	1.15416	0.75116	1.98137	ACTL6B							1.15416	0.75116	1.98137	ACTL6B
ACTL7A	1.22012	0.905873	1.06705	1.3469	1.17792	0.874548	1.33315	0.754832	1.07018	ACTL7A										ACTL7A
ACTL7B	1.23273	0.934121	0.336164	1.31967	0.359872	0.272699	1.35879	0.818095	0.328909	ACTL7B										ACTL7B
ACTL8	0.823621	1.11332	0.34887	0.739789	0.313361	0.423581	0.770374	1.45994	0.339295	ACTL8				0.739789	0.313361	0.423581	0.770374	1.45994	0.339295	ACTL8
ACTL9	1.23463	0.928214	0.37453	1.33011	0.403496	0.303355	1.36892	0.809369	0.366579	ACTL9										ACTL9
ACTN1	0.912531	1.04302	0.892486	0.874895	0.855677	0.978034	0.882326	1.14626	0.888305	ACTN1	0.912531	1.04302	0.892486	0.874895	0.855677	0.978034	0.882326	1.14626	0.888305	ACTN1
ACTN2	1.08297	0.956461	1.12699	1.13226	1.1783	1.04065	1.11768	0.877355	1.1351	ACTN2	1.08297	0.956461	1.12699	1.13226	1.1783	1.04065	1.11768	0.877355	1.1351	ACTN2
ACTN4	0.890721	1.04254	1.04437	0.85438	1.00176	1.1725	0.854295	1.14544	1.04634	ACTN4	0.890721	1.04254	1.04437	0.85438	1.00176	1.1725	0.854295	1.14544	1.04634	ACTN4
ACTR1B	1.06858	0.967123	1.05933	1.1049	1.09534	0.99135	1.09948	0.905935	1.06173	ACTR1B	1.06858	0.967123	1.05933	1.1049	1.09534	0.99135	1.09948	0.905935	1.06173	ACTR1B
ACTR5	1.01081	1.00777	0.824579	1.00302	0.818225	0.815765	1.01495	1.02456	0.817515	ACTR5	1.01081	1.00777	0.824579	1.00302	0.818225	0.815765	1.01495	1.02456	0.817515	ACTR5
ACTR8	0.976513	0.967944	1.52545	1.00885	1.57597	1.56214	0.968873	0.902052	1.57227	ACTR8	0.976513	0.967944	1.52545	1.00885	1.57597	1.56214	0.968873	0.902052	1.57227	ACTR8
ACTRT1	0.85015	0.996567	2.12914	0.853078	2.13647	2.50443	0.805443	0.98895	2.22846	ACTRT1										ACTRT1
ACTRT2	1.19032	0.945775	0.460638	1.25856	0.487048	0.386987	1.29089	0.850084	0.451892	ACTRT2										ACTRT2
ACVR1	0.760779	1.10759	0.690374	0.686878	0.623313	0.907457	0.703821	1.47759	0.679819	ACVR1				0.686878	0.623313	0.907457	0.703821	1.47759	0.679819	ACVR1
ACVR1C	0.988606	0.976886	1.37179	1.012	1.40425	1.3876	0.98484	0.927421	1.3998	ACVR1C	0.988606	0.976886	1.37179	1.012	1.40425	1.3876	0.98484	0.927421	1.3998	ACVR1C
ACVR2B	0.951723	1.0474	0.560364	0.908654	0.535005	0.588789	0.934407	1.16458	0.549553	ACVR2B	0.951723	1.0474	0.560364	0.908654	0.535005	0.588789	0.934407	1.16458	0.549553	ACVR2B
ACVRL1	1.02598	1.00735	0.667429	1.0185	0.662558	0.650525	1.0367	1.02321	0.658956	ACVRL1	1.02598	1.00735	0.667429	1.0185	0.662558	0.650525	1.0367	1.02321	0.658956	ACVRL1
ACVRL1_ENST00000550683	1.04798	0.992354	0.766097	1.05605	0.772	0.731023	1.06841	0.976574	0.759414	ACVRL1_ENST00000550683	1.04798	0.992354	0.766097	1.05605	0.772	0.731023	1.06841	0.976574	0.759414	ACVRL1_ENST00000550683
ADAD1	0.988308	1.02668	0.730776	0.962627	0.711787	0.739422	0.98483	1.09766	0.718414	ADAD1	0.988308	1.02668	0.730776	0.962627	0.711787	0.739422	0.98483	1.09766	0.718414	ADAD1
ADAD2	0.79955	1.11329	0.527774	0.71819	0.474069	0.660088	0.737623	1.44485	0.518808	ADAD2				0.71819	0.474069	0.660088	0.737623	1.44485	0.518808	ADAD2
ADAM10	0.676188	1.14248	0.417771	0.591857	0.365669	0.617833	0.617313	1.81501	0.405295	ADAM10										ADAM10
ADAM11	1.02222	0.97271	1.33186	1.0509	1.36922	1.3029	1.03128	0.919449	1.34902	ADAM11	1.02222	0.97271	1.33186	1.0509	1.36922	1.3029	1.03128	0.919449	1.34902	ADAM11
ADAM12	0.813988	1.07414	0.961229	0.757802	0.89488	1.18089	0.762135	1.28956	0.959695	ADAM12	0.813988	1.07414	0.961229	0.757802	0.89488	1.18089	0.762135	1.28956	0.959695	ADAM12
ADAM12_ENST00000368676	0.870489	1.06363	0.742892	0.81841	0.698447	0.85342	0.832473	1.24694	0.73473	ADAM12_ENST00000368676	0.870489	1.06363	0.742892	0.81841	0.698447	0.85342	0.832473	1.24694	0.73473	ADAM12_ENST00000368676
ADAM15	0.906699	1.05764	0.645795	0.857286	0.6106	0.712248	0.873729	1.20343	0.637744	ADAM15	0.906699	1.05764	0.645795	0.857286	0.6106	0.712248	0.873729	1.20343	0.637744	ADAM15
ADAM17	0.873112	1.03928	1.04317	0.840113	1.00375	1.19478	0.839908	1.15151	1.04553	ADAM17	0.873112	1.03928	1.04317	0.840113	1.00375	1.19478	0.839908	1.15151	1.04553	ADAM17
ADAM18	0.909526	1.05557	0.6523	0.861643	0.617959	0.717186	0.886825	1.23313	0.638644	ADAM18	0.909526	1.05557	0.6523	0.861643	0.617959	0.717186	0.886825	1.23313	0.638644	ADAM18
ADAM19	0.891043	1.01083	1.55533	0.881494	1.53866	1.74551	0.855896	1.03533	1.59249	ADAM19	0.891043	1.01083	1.55533	0.881494	1.53866	1.74551	0.855896	1.03533	1.59249	ADAM19
ADAM2	1.08923	0.981167	0.914063	1.11014	0.931608	0.839183	1.11613	0.934637	0.908917	ADAM2	1.08923	0.981167	0.914063	1.11014	0.931608	0.839183	1.11613	0.934637	0.908917	ADAM2
ADAM20	1.16794	0.907973	1.5133	1.28631	1.66668	1.2957	1.23308	0.740065	1.55464	ADAM20										ADAM20
ADAM21	0.841691	1.04078	1.18862	0.80871	1.14204	1.41218	0.801395	1.15634	1.20022	ADAM21	0.841691	1.04078	1.18862	0.80871	1.14204	1.41218	0.801395	1.15634	1.20022	ADAM21
ADAM22	0.991424	0.982952	1.28169	1.00862	1.30391	1.29277	0.988736	0.943741	1.30107	ADAM22	0.991424	0.982952	1.28169	1.00862	1.30391	1.29277	0.988736	0.943741	1.30107	ADAM22
ADAM23	0.954289	1.02655	0.85283	0.929609	0.830774	0.893681	0.93979	1.09427	0.846567	ADAM23	0.954289	1.02655	0.85283	0.929609	0.830774	0.893681	0.93979	1.09427	0.846567	ADAM23
ADAM23_ENST00000374415	1.04862	0.998433	0.768802	1.05027	0.770009	0.733156	1.06605	0.994791	0.759909	ADAM23_ENST00000374415	1.04862	0.998433	0.768802	1.05027	0.770009	0.733156	1.06605	0.994791	0.759909	ADAM23_ENST00000374415
ADAM28	1.2053	0.927791	1.08922	1.29911	1.17399	0.903693	1.28592	0.781944	1.09383	ADAM28										ADAM28
ADAM29	0.829821	1.05726	0.982595	0.78488	0.92938	1.1841	0.788426	1.23517	0.981721	ADAM29	0.829821	1.05726	0.982595	0.78488	0.92938	1.1841	0.788426	1.23517	0.981721	ADAM29
ADAM30	0.855987	1.04709	1.00783	0.817488	0.9625	1.17739	0.820187	1.1764	1.0084	ADAM30	0.855987	1.04709	1.00783	0.817488	0.9625	1.17739	0.820187	1.1764	1.0084	ADAM30
ADAM32	0.999574	1.03368	0.629784	0.967002	0.609262	0.630053	0.999453	1.12835	0.614068	ADAM32	0.999574	1.03368	0.629784	0.967002	0.609262	0.630053	0.999453	1.12835	0.614068	ADAM32
ADAM33	1.00648	0.990625	1.12956	1.016	1.14025	1.12229	1.00891	0.970184	1.13513	ADAM33	1.00648	0.990625	1.12956	1.016	1.14025	1.12229	1.00891	0.970184	1.13513	ADAM33
ADAM7	0.94804	1.03056	0.829542	0.91993	0.804946	0.875007	0.932489	1.11164	0.821816	ADAM7	0.94804	1.03056	0.829542	0.91993	0.804946	0.875007	0.932489	1.11164	0.821816	ADAM7
ADAM9	0.808266	1.0675	0.98316	0.75716	0.920995	1.21638	0.760955	1.27574	0.982332	ADAM9	0.808266	1.0675	0.98316	0.75716	0.920995	1.21638	0.760955	1.27574	0.982332	ADAM9
ADAMTS1	0.944902	1.03445	0.777862	0.913437	0.751959	0.823219	0.926996	1.12336	0.770052	ADAMTS1	0.944902	1.03445	0.777862	0.913437	0.751959	0.823219	0.926996	1.12336	0.770052	ADAMTS1
ADAMTS10	0.986998	1.00466	1.01008	0.982418	1.00539	1.02339	0.982144	1.01506	1.01048	ADAMTS10	0.986998	1.00466	1.01008	0.982418	1.00539	1.02339	0.982144	1.01506	1.01048	ADAMTS10
ADAMTS12	0.982269	1.03303	0.607127	0.950858	0.587712	0.618086	0.97638	1.1188	0.595509	ADAMTS12	0.982269	1.03303	0.607127	0.950858	0.587712	0.618086	0.97638	1.1188	0.595509	ADAMTS12
ADAMTS13	0.802969	1.07456	1.06446	0.747251	0.990599	1.32566	0.747623	1.28653	1.06721	ADAMTS13	0.802969	1.07456	1.06446	0.747251	0.990599	1.32566	0.747623	1.28653	1.06721	ADAMTS13
ADAMTS14	0.87901	1.05017	0.962376	0.837016	0.916399	1.09484	0.840848	1.18052	0.960883	ADAMTS14	0.87901	1.05017	0.962376	0.837016	0.916399	1.09484	0.840848	1.18052	0.960883	ADAMTS14
ADAMTS15	0.953352	1.04066	0.588228	0.916106	0.565247	0.617011	0.936124	1.13997	0.579504	ADAMTS15	0.953352	1.04066	0.588228	0.916106	0.565247	0.617011	0.936124	1.13997	0.579504	ADAMTS15
ADAMTS16	0.956351	1.02031	0.942836	0.937315	0.924069	0.985868	0.941894	1.0692	0.940164	ADAMTS16	0.956351	1.02031	0.942836	0.937315	0.924069	0.985868	0.941894	1.0692	0.940164	ADAMTS16
ADAMTS17	1.10489	0.924898	1.544	1.1946	1.66937	1.39743	1.14942	0.793811	1.58258	ADAMTS17							1.14942	0.793811	1.58258	ADAMTS17
ADAMTS18	0.894575	1.04679	0.915516	0.854592	0.874596	1.02341	0.862777	1.1653	0.910946	ADAMTS18	0.894575	1.04679	0.915516	0.854592	0.874596	1.02341	0.862777	1.1653	0.910946	ADAMTS18
ADAMTS19	0.892298	1.02966	1.1056	0.866596	1.07375	1.23904	0.862167	1.10717	1.11212	ADAMTS19	0.892298	1.02966	1.1056	0.866596	1.07375	1.23904	0.862167	1.10717	1.11212	ADAMTS19
ADAMTS19_ENST00000274487	1.03036	0.992126	0.963565	1.03854	0.971213	0.935172	1.04062	0.974016	0.961627	ADAMTS19_ENST00000274487	1.03036	0.992126	0.963565	1.03854	0.971213	0.935172	1.04062	0.974016	0.961627	ADAMTS19_ENST00000274487
ADAMTS2	1.01713	0.998843	0.892995	1.01831	0.89403	0.877956	1.02369	0.996258	0.889428	ADAMTS2	1.01713	0.998843	0.892995	1.01831	0.89403	0.877956	1.02369	0.996258	0.889428	ADAMTS2
ADAMTS2_ENST00000274609	0.870122	1.07101	0.576885	0.812435	0.538639	0.662993	0.828132	1.27167	0.569548	ADAMTS2_ENST00000274609	0.870122	1.07101	0.576885	0.812435	0.538639	0.662993	0.828132	1.27167	0.569548	ADAMTS2_ENST00000274609
ADAMTS20	0.935329	1.01305	1.08159	0.923283	1.06766	1.15637	0.918305	1.04732	1.08748	ADAMTS20	0.935329	1.01305	1.08159	0.923283	1.06766	1.15637	0.918305	1.04732	1.08748	ADAMTS20
ADAMTS20_ENST00000553158	0.95026	0.986125	1.34415	0.96363	1.36307	1.41451	0.936805	0.952993	1.375	ADAMTS20_ENST00000553158	0.95026	0.986125	1.34415	0.96363	1.36307	1.41451	0.936805	0.952993	1.375	ADAMTS20_ENST00000553158
ADAMTS3	0.731415	1.10162	0.852136	0.663944	0.773529	1.16505	0.673861	1.46512	0.845651	ADAMTS3				0.663944	0.773529	1.16505	0.673861	1.46512	0.845651	ADAMTS3
ADAMTS4	1.027	0.968106	1.39613	1.06083	1.44212	1.35942	1.03847	0.907952	1.41621	ADAMTS4	1.027	0.968106	1.39613	1.06083	1.44212	1.35942	1.03847	0.907952	1.41621	ADAMTS4
ADAMTS5	0.982426	1.00229	1.07899	0.980184	1.07653	1.0983	0.975927	1.00727	1.08268	ADAMTS5	0.982426	1.00229	1.07899	0.980184	1.07653	1.0983	0.975927	1.00727	1.08268	ADAMTS5
ADAMTS7	1.1659	0.932161	1.03708	1.25075	1.11255	0.889506	1.24352	0.810328	1.03858	ADAMTS7										ADAMTS7
ADAMTS8	1.08245	0.944931	1.40845	1.14553	1.49053	1.30117	1.11825	0.844091	1.43016	ADAMTS8				1.14553	1.49053	1.30117	1.11825	0.844091	1.43016	ADAMTS8
ADAMTS9	0.837119	1.0255	1.4043	0.816304	1.36938	1.67754	0.795593	1.09169	1.43706	ADAMTS9	0.837119	1.0255	1.4043	0.816304	1.36938	1.67754	0.795593	1.09169	1.43706	ADAMTS9
ADAMTSL1	0.982383	1.01492	0.877622	0.967944	0.864722	0.89336	0.975966	1.04878	0.872677	ADAMTSL1	0.982383	1.01492	0.877622	0.967944	0.864722	0.89336	0.975966	1.04878	0.872677	ADAMTSL1
ADAMTSL1_ENST00000380566	1.12727	0.959252	0.902175	1.17516	0.940498	0.800315	1.17976	0.878642	0.897694	ADAMTSL1_ENST00000380566				1.17516	0.940498	0.800315	1.17976	0.878642	0.897694	ADAMTSL1_ENST00000380566
ADAMTSL2	0.881495	1.07555	0.475116	0.819578	0.441743	0.538989	0.845258	1.29841	0.464957	ADAMTSL2	0.881495	1.07555	0.475116	0.819578	0.441743	0.538989	0.845258	1.29841	0.464957	ADAMTSL2
ADAMTSL2_ENST00000393061	0.890428	1.07215	0.472935	0.830508	0.44111	0.531133	0.855966	1.28001	0.463053	ADAMTSL2_ENST00000393061	0.890428	1.07215	0.472935	0.830508	0.44111	0.531133	0.855966	1.28001	0.463053	ADAMTSL2_ENST00000393061
ADAMTSL3	0.976188	0.979852	1.37782	0.996261	1.40615	1.41143	0.968641	0.935745	1.40752	ADAMTSL3	0.976188	0.979852	1.37782	0.996261	1.40615	1.41143	0.968641	0.935745	1.40752	ADAMTSL3
ADAMTSL3_ENST00000567476	0.849089	0.987656	1.88251	0.859702	1.90603	2.21709	0.808846	0.960021	1.97865	ADAMTSL3_ENST00000567476							0.808846	0.960021	1.97865	ADAMTSL3_ENST00000567476
ADAMTSL4	1.0426	0.98686	0.936252	1.05648	0.948718	0.898	1.0595	0.959189	0.933742	ADAMTSL4	1.0426	0.98686	0.936252	1.05648	0.948718	0.898	1.0595	0.959189	0.933742	ADAMTSL4
ADAMTSL4_ENST00000369041	1.08133	0.966336	1.01529	1.119	1.05066	0.938925	1.11594	0.900492	1.01592	ADAMTSL4_ENST00000369041	1.08133	0.966336	1.01529	1.119	1.05066	0.938925	1.11594	0.900492	1.01592	ADAMTSL4_ENST00000369041
ADAR	1.01143	1.02697	0.567987	0.984865	0.553071	0.56157	1.01562	1.09086	0.55542	ADAR	1.01143	1.02697	0.567987	0.984865	0.553071	0.56157	1.01562	1.09086	0.55542	ADAR
ADARB1	0.954879	1.03658	0.637689	0.921179	0.615183	0.667821	0.93838	1.12632	0.629592	ADARB1	0.954879	1.03658	0.637689	0.921179	0.615183	0.667821	0.93838	1.12632	0.629592	ADARB1
ADARB1_ENST00000389863	0.926639	1.0532	0.523552	0.879829	0.497104	0.565001	0.901021	1.19244	0.514993	ADARB1_ENST00000389863	0.926639	1.0532	0.523552	0.879829	0.497104	0.565001	0.901021	1.19244	0.514993	ADARB1_ENST00000389863
ADARB2	1.12586	0.975536	0.327541	1.15409	0.335755	0.290926	1.18508	0.925694	0.321276	ADARB2				1.15409	0.335755	0.290926	1.18508	0.925694	0.321276	ADARB2
ADAT1	0.691801	1.09258	1.31725	0.633182	1.20563	1.90408	0.624493	1.37743	1.33968	ADAT1										ADAT1
ADCK1	0.877899	1.07709	0.559612	0.815066	0.519559	0.637445	0.836807	1.28198	0.549898	ADCK1	0.877899	1.07709	0.559612	0.815066	0.519559	0.637445	0.836807	1.28198	0.549898	ADCK1
ADCK2	1.0683	0.993843	0.530937	1.07492	0.534226	0.496991	1.09895	0.981197	0.522485	ADCK2	1.0683	0.993843	0.530937	1.07492	0.534226	0.496991	1.09895	0.981197	0.522485	ADCK2
ADCK5	0.627886	1.17503	0.562888	0.534359	0.479043	0.896482	0.546992	1.89105	0.554941	ADCK5										ADCK5
ADCY1	0.871846	1.06562	0.783218	0.818159	0.734989	0.898345	0.828273	1.23493	0.777526	ADCY1	0.871846	1.06562	0.783218	0.818159	0.734989	0.898345	0.828273	1.23493	0.777526	ADCY1
ADCY10	1.01327	1.00134	0.92044	1.01192	0.919211	0.908385	1.01807	1.00423	0.916182	ADCY10	1.01327	1.00134	0.92044	1.01192	0.919211	0.908385	1.01807	1.00423	0.916182	ADCY10
ADCY2	1.03651	1.01	0.572976	1.02626	0.567305	0.552791	1.05157	1.03175	0.562967	ADCY2	1.03651	1.01	0.572976	1.02626	0.567305	0.552791	1.05157	1.03175	0.562967	ADCY2
ADCY3	1.13027	0.936979	1.12308	1.20629	1.19862	0.993642	1.19472	0.829543	1.12804	ADCY3										ADCY3
ADCY4	1.1815	0.9434	0.553137	1.25239	0.586323	0.468164	1.27949	0.847241	0.544055	ADCY4										ADCY4
ADCY5	1.06562	0.944972	1.60879	1.12768	1.70247	1.50972	1.09466	0.845415	1.64028	ADCY5				1.12768	1.70247	1.50972	1.09466	0.845415	1.64028	ADCY5
ADCY6	0.836399	1.11131	0.109373	0.752624	0.0984177	0.130766	0.784106	1.45308	0.10628	ADCY6										ADCY6
ADCY7	0.964863	1.03497	0.579986	0.932262	0.56039	0.601108	0.951209	1.11715	0.572001	ADCY7	0.964863	1.03497	0.579986	0.932262	0.56039	0.601108	0.951209	1.11715	0.572001	ADCY7
ADCY8	1.01938	1.00561	0.76933	1.01369	0.765036	0.754705	1.02732	1.01745	0.761937	ADCY8	1.01938	1.00561	0.76933	1.01369	0.765036	0.754705	1.02732	1.01745	0.761937	ADCY8
ADCY9	1.11242	0.96801	0.726035	1.14918	0.750028	0.652663	1.16391	0.906059	0.718612	ADCY9	1.11242	0.96801	0.726035	1.14918	0.750028	0.652663	1.16391	0.906059	0.718612	ADCY9
ADCYAP1R1	1.04221	0.962086	1.31608	1.08328	1.36795	1.26278	1.05931	0.890689	1.33575	ADCYAP1R1	1.04221	0.962086	1.31608	1.08328	1.36795	1.26278	1.05931	0.890689	1.33575	ADCYAP1R1
ADD1	1.26055	0.905851	0.887148	1.39156	0.979353	0.703781	1.3931	0.746974	0.883069	ADD1										ADD1
ADD2	0.86737	1.05052	1.02915	0.825654	0.979651	1.18652	0.826561	1.18324	1.03038	ADD2	0.86737	1.05052	1.02915	0.825654	0.979651	1.18652	0.826561	1.18324	1.03038	ADD2
ADD2_ENST00000430656	0.875816	1.05249	0.944714	0.832139	0.897601	1.07867	0.836566	1.19045	0.942683	ADD2_ENST00000430656	0.875816	1.05249	0.944714	0.832139	0.897601	1.07867	0.836566	1.19045	0.942683	ADD2_ENST00000430656
ADD3	0.914514	1.03424	0.936592	0.884236	0.905583	1.02414	0.890089	1.12607	0.933298	ADD3	0.914514	1.03424	0.936592	0.884236	0.905583	1.02414	0.890089	1.12607	0.933298	ADD3
ADGB	0.569018	1.12482	1.25278	0.505873	1.11376	2.20165	0.501594	1.60331	1.27228	ADGB										ADGB
ADH1A	0.778112	1.07615	1.18121	0.723053	1.09762	1.51804	0.720048	1.31152	1.18818	ADH1A	0.778112	1.07615	1.18121	0.723053	1.09762	1.51804	0.720048	1.31152	1.18818	ADH1A
ADH1B	0.996702	1.03303	0.207915	0.96483	0.201266	0.208602	0.995462	1.11837	0.203282	ADH1B							0.995462	1.11837	0.203282	ADH1B
ADH6	0.911006	1.01738	1.31423	0.895447	1.29178	1.44261	0.882482	1.05965	1.33026	ADH6	0.911006	1.01738	1.31423	0.895447	1.29178	1.44261	0.882482	1.05965	1.33026	ADH6
ADH7	0.761307	1.07604	1.2142	0.707508	1.12839	1.59488	0.703442	1.32252	1.22327	ADH7	0.761307	1.07604	1.2142	0.707508	1.12839	1.59488	0.703442	1.32252	1.22327	ADH7
ADHFE1	0.587758	1.1362	1.57723	0.517301	1.38817	2.68348	0.507969	1.62993	1.61022	ADHFE1										ADHFE1
ADNP	0.799854	1.03502	1.43877	0.77279	1.39009	1.79879	0.752963	1.13271	1.47387	ADNP	0.799854	1.03502	1.43877	0.77279	1.39009	1.79879	0.752963	1.13271	1.47387	ADNP
ADNP2	0.923892	1.00502	1.44216	0.919277	1.43496	1.56096	0.899133	1.01673	1.46767	ADNP2	0.923892	1.00502	1.44216	0.919277	1.43496	1.56096	0.899133	1.01673	1.46767	ADNP2
ADORA1	0.734925	1.16309	0.252457	0.631872	0.217056	0.343513	0.653173	1.67156	0.247079	ADORA1							0.653173	1.67156	0.247079	ADORA1
ADORA2A	1.02808	0.998529	0.780144	1.02959	0.781293	0.758837	1.04068	0.995627	0.774148	ADORA2A	1.02808	0.998529	0.780144	1.02959	0.781293	0.758837	1.04068	0.995627	0.774148	ADORA2A
ADRA1A	1.11463	0.961994	0.784484	1.15866	0.815477	0.703809	1.16996	0.892835	0.778031	ADRA1A	1.11463	0.961994	0.784484	1.15866	0.815477	0.703809	1.16996	0.892835	0.778031	ADRA1A
ADRA1A_ENST00000354550	1.08504	0.978865	0.726296	1.10846	0.741978	0.669375	1.12439	0.938675	0.71834	ADRA1A_ENST00000354550	1.08504	0.978865	0.726296	1.10846	0.741978	0.669375	1.12439	0.938675	0.71834	ADRA1A_ENST00000354550
ADRA1A_ENST00000380572	1.22749	0.892687	1.08238	1.37506	1.2125	0.881784	1.3592	0.737192	1.08597	ADRA1A_ENST00000380572										ADRA1A_ENST00000380572
ADRA1A_ENST00000380573	1.13299	0.957378	0.726916	1.18343	0.759278	0.641592	1.19893	0.881313	0.719158	ADRA1A_ENST00000380573				1.18343	0.759278	0.641592				ADRA1A_ENST00000380573
ADRA1A_ENST00000380582	1.10215	0.968226	0.760516	1.13831	0.785473	0.690031	1.15149	0.910316	0.753472	ADRA1A_ENST00000380582	1.10215	0.968226	0.760516	1.13831	0.785473	0.690031	1.15149	0.910316	0.753472	ADRA1A_ENST00000380582
ADRA1D	1.10056	0.969331	0.707079	1.13538	0.729451	0.642474	1.14676	0.907992	0.701553	ADRA1D	1.10056	0.969331	0.707079	1.13538	0.729451	0.642474	1.14676	0.907992	0.701553	ADRA1D
ADRA2A	1.16284	0.941097	0.709429	1.23562	0.753832	0.610083	1.24864	0.83915	0.703158	ADRA2A										ADRA2A
ADRB2	1.23485	0.926086	0.646548	1.3334	0.698151	0.523585	1.3571	0.799891	0.63673	ADRB2										ADRB2
ADSL	0.920322	1.04794	0.68839	0.878221	0.656899	0.747988	0.895423	1.17977	0.679225	ADSL	0.920322	1.04794	0.68839	0.878221	0.656899	0.747988	0.895423	1.17977	0.679225	ADSL
ADSL_ENST00000216194	0.926525	1.04743	0.67281	0.88457	0.642343	0.726164	0.903274	1.17617	0.663091	ADSL_ENST00000216194	0.926525	1.04743	0.67281	0.88457	0.642343	0.726164	0.903274	1.17617	0.663091	ADSL_ENST00000216194
ADSSL1	0.786622	1.05637	1.62228	0.744649	1.53572	2.06234	0.724473	1.19728	1.66211	ADSSL1	0.786622	1.05637	1.62228	0.744649	1.53572	2.06234	0.724473	1.19728	1.66211	ADSSL1
AEBP1	1.01841	1.00673	0.768682	1.0116	0.763541	0.754783	1.02571	1.0213	0.760972	AEBP1	1.01841	1.00673	0.768682	1.0116	0.763541	0.754783	1.02571	1.0213	0.760972	AEBP1
AFAP1	1.12586	0.923208	1.42886	1.21951	1.54772	1.26913	1.18354	0.793252	1.45485	AFAP1							1.18354	0.793252	1.45485	AFAP1
AFAP1L1	0.861038	1.01762	1.65368	0.846132	1.62505	1.92056	0.816954	1.05703	1.70142	AFAP1L1	0.861038	1.01762	1.65368	0.846132	1.62505	1.92056	0.816954	1.05703	1.70142	AFAP1L1
AFAP1L2	0.854031	1.05387	1.09424	0.810379	1.03831	1.28127	0.808597	1.19045	1.09873	AFAP1L2	0.854031	1.05387	1.09424	0.810379	1.03831	1.28127	0.808597	1.19045	1.09873	AFAP1L2
AFF2	0.87037	1.0732	0.5856	0.811002	0.545656	0.672817	0.832988	1.29387	0.574856	AFF2	0.87037	1.0732	0.5856	0.811002	0.545656	0.672817	0.832988	1.29387	0.574856	AFF2
AFF2_ENST00000286437	0.8434	1.08557	0.496672	0.776922	0.457524	0.588892	0.79879	1.35625	0.487198	AFF2_ENST00000286437	0.8434	1.08557	0.496672	0.776922	0.457524	0.588892	0.79879	1.35625	0.487198	AFF2_ENST00000286437
AFF3	1.15966	0.946987	0.874986	1.22458	0.923968	0.754521	1.22984	0.84481	0.870282	AFF3										AFF3
AFF4	0.780921	1.05878	1.2185	0.737567	1.15086	1.56034	0.730279	1.23608	1.23275	AFF4	0.780921	1.05878	1.2185	0.737567	1.15086	1.56034	0.730279	1.23608	1.23275	AFF4
AFG3L2	1.00569	1.00275	0.92578	1.00294	0.923245	0.920541	1.00776	1.00888	0.922492	AFG3L2	1.00569	1.00275	0.92578	1.00294	0.923245	0.920541	1.00776	1.00888	0.922492	AFG3L2
AFM	0.89272	1.04709	0.83646	0.852574	0.798844	0.936979	0.864258	1.18635	0.82911	AFM	0.89272	1.04709	0.83646	0.852574	0.798844	0.936979	0.864258	1.18635	0.82911	AFM
AFP	0.620803	1.18396	0.397726	0.524345	0.335929	0.640664	0.554535	2.05995	0.382414	AFP										AFP	0.620803	1.18396	0.397726
AFTPH	0.959614	0.993907	1.28348	0.965497	1.29135	1.33749	0.948741	0.977658	1.30177	AFTPH	0.959614	0.993907	1.28348	0.965497	1.29135	1.33749	0.948741	0.977658	1.30177	AFTPH
AGAP1	0.981929	1.00722	1.00384	0.974892	0.996641	1.02231	0.975067	1.02299	1.00399	AGAP1	0.981929	1.00722	1.00384	0.974892	0.996641	1.02231	0.975067	1.02299	1.00399	AGAP1
AGAP2	0.982989	0.986244	1.46469	0.996699	1.48512	1.49004	0.976208	0.958317	1.48659	AGAP2	0.982989	0.986244	1.46469	0.996699	1.48512	1.49004	0.976208	0.958317	1.48659	AGAP2
AGAP3	0.800242	1.10775	0.513332	0.722403	0.463401	0.641471	0.741096	1.43856	0.504794	AGAP3				0.722403	0.463401	0.641471	0.741096	1.43856	0.504794	AGAP3
AGAP5	0.6556	1.13385	0.883901	0.578206	0.779556	1.34823	0.585239	1.6518	0.879601	AGAP5										AGAP5
AGAP6	0.454827	1.16863	1.53891	0.389197	1.31685	3.38351	0.382508	1.93589	1.57519	AGAP6										AGAP6	0.454827	1.16863	1.53891
AGBL1	0.931081	1.03588	0.838154	0.898829	0.80912	0.900194	0.908405	1.12745	0.832461	AGBL1	0.931081	1.03588	0.838154	0.898829	0.80912	0.900194	0.908405	1.12745	0.832461	AGBL1
AGBL1_ENST00000441037	0.825038	1.08316	0.726268	0.761694	0.670508	0.880284	0.775752	1.33387	0.718004	AGBL1_ENST00000441037	0.825038	1.08316	0.726268	0.761694	0.670508	0.880284	0.775752	1.33387	0.718004	AGBL1_ENST00000441037
AGBL2	0.733573	1.12099	0.717092	0.654399	0.639697	0.977533	0.671951	1.53412	0.705711	AGBL2				0.654399	0.639697	0.977533	0.671951	1.53412	0.705711	AGBL2
AGBL4	0.763773	1.01714	1.94914	0.750902	1.91629	2.55199	0.703028	1.05518	2.06175	AGBL4										AGBL4
AGBL5	0.566383	1.16274	1.24319	0.487109	1.06918	2.19496	0.485377	1.79892	1.25499	AGBL5										AGBL5
AGBL5_ENST00000323064	0.653849	1.12268	1.26371	0.5824	1.12562	1.93273	0.578281	1.53059	1.27819	AGBL5_ENST00000323064										AGBL5_ENST00000323064
AGFG2	0.815462	1.1056	0.309107	0.737573	0.279582	0.379057	0.759672	1.43806	0.302882	AGFG2				0.737573	0.279582	0.379057	0.759672	1.43806	0.302882	AGFG2
AGGF1	0.675664	1.08977	1.14129	0.620006	1.04728	1.68914	0.617836	1.41348	1.15124	AGGF1										AGGF1
AGK	0.627398	1.10758	1.40647	0.566457	1.26985	2.24175	0.556426	1.46775	1.43706	AGK										AGK
AGL	0.740742	1.08519	0.958939	0.682594	0.883662	1.29457	0.690018	1.36604	0.955891	AGL	0.740742	1.08519	0.958939	0.682594	0.883662	1.29457	0.690018	1.36604	0.955891	AGL
AGMO	0.818549	1.04938	1.15719	0.780034	1.10274	1.41371	0.773884	1.18602	1.16864	AGMO	0.818549	1.04938	1.15719	0.780034	1.10274	1.41371	0.773884	1.18602	1.16864	AGMO
AGPAT4	0.852225	1.04322	1.30393	0.816921	1.24992	1.53003	0.804074	1.14165	1.3231	AGPAT4	0.852225	1.04322	1.30393	0.816921	1.24992	1.53003	0.804074	1.14165	1.3231	AGPAT4
AGPS	0.816533	1.0531	1.14495	0.775361	1.08721	1.4022	0.771022	1.20851	1.15353	AGPS	0.816533	1.0531	1.14495	0.775361	1.08721	1.4022	0.771022	1.20851	1.15353	AGPS
AGRN	0.906682	1.0406	0.959957	0.871308	0.922505	1.05876	0.874236	1.14113	0.958733	AGRN	0.906682	1.0406	0.959957	0.871308	0.922505	1.05876	0.874236	1.14113	0.958733	AGRN
AGT	1.1592	0.904276	1.54182	1.28191	1.70503	1.33006	1.24443	0.757499	1.56797	AGT										AGT
AGTPBP1	0.692741	1.07415	1.391	0.644918	1.29497	2.00797	0.632865	1.31996	1.41983	AGTPBP1				0.644918	1.29497	2.00797				AGTPBP1
AGTPBP1_ENST00000357081	0.784085	1.02997	1.54724	0.761271	1.50222	1.97331	0.736472	1.11504	1.59472	AGTPBP1_ENST00000357081	0.784085	1.02997	1.54724	0.761271	1.50222	1.97331	0.736472	1.11504	1.59472	AGTPBP1_ENST00000357081
AGTR1	0.691973	1.12324	0.975086	0.616052	0.868103	1.40914	0.620693	1.54007	0.97404	AGTR1										AGTR1
AGTR2	1.15503	0.922626	1.31479	1.25189	1.42505	1.13832	1.2204	0.782616	1.33464	AGTR2										AGTR2
AGXT	1.06138	0.996443	0.525336	1.06517	0.527211	0.494955	1.08935	0.989236	0.516935	AGXT	1.06138	0.996443	0.525336	1.06517	0.527211	0.494955	1.08935	0.989236	0.516935	AGXT
AGXT2	0.783557	1.1236	0.27216	0.697363	0.242221	0.347339	0.729446	1.58367	0.263495	AGXT2				0.697363	0.242221	0.347339	0.729446	1.58367	0.263495	AGXT2
AHCTF1	0.882646	0.985177	1.47813	0.895926	1.50037	1.67465	0.854023	0.952002	1.53888	AHCTF1	0.882646	0.985177	1.47813	0.895926	1.50037	1.67465	0.854023	0.952002	1.53888	AHCTF1
AHCY	1.03869	1.00564	0.525483	1.03287	0.522538	0.505911	1.05507	1.01795	0.517508	AHCY	1.03869	1.00564	0.525483	1.03287	0.522538	0.505911	1.05507	1.01795	0.517508	AHCY
AHCYL2	0.54201	1.14279	1.52232	0.474288	1.33211	2.80865	0.464922	1.67395	1.5603	AHCYL2										AHCYL2
AHCYL2_ENST00000474594	0.584805	1.12592	1.37959	0.5194	1.2253	2.35906	0.511535	1.57238	1.40816	AHCYL2_ENST00000474594										AHCYL2_ENST00000474594
AHDC1	1.02811	0.983071	1.10894	1.04581	1.12804	1.07862	1.04063	0.949969	1.11234	AHDC1	1.02811	0.983071	1.10894	1.04581	1.12804	1.07862	1.04063	0.949969	1.11234	AHDC1
AHI1	0.587006	1.06755	1.77361	0.549862	1.66139	3.02146	0.524808	1.29323	1.85907	AHI1										AHI1
AHI1_ENST00000327035	0.547718	1.08099	1.73451	0.506683	1.60456	3.16679	0.485762	1.37345	1.81285	AHI1_ENST00000327035										AHI1_ENST00000327035
AHNAK	1.15368	0.947302	0.876121	1.21786	0.924859	0.759411	1.22117	0.839532	0.873172	AHNAK										AHNAK
AHNAK2	0.566771	1.15934	1.11958	0.488874	0.965705	1.97536	0.489562	1.86188	1.12374	AHNAK2										AHNAK2
AHR	0.859307	1.0449	1.03477	0.822383	0.990309	1.2042	0.822969	1.17062	1.03691	AHR	0.859307	1.0449	1.03477	0.822383	0.990309	1.2042	0.822969	1.17062	1.03691	AHR
AHRR	0.922328	1.06239	0.370057	0.868163	0.348325	0.401221	0.895848	1.23372	0.361947	AHRR				0.868163	0.348325	0.401221	0.895848	1.23372	0.361947	AHRR
AHSG	0.734162	1.11888	0.793441	0.656158	0.709138	1.08074	0.667032	1.50832	0.786556	AHSG				0.656158	0.709138	1.08074	0.667032	1.50832	0.786556	AHSG
AICDA	0.760402	1.0696	1.37026	0.710925	1.2811	1.80202	0.697211	1.25011	1.39795	AICDA	0.760402	1.0696	1.37026	0.710925	1.2811	1.80202	0.697211	1.25011	1.39795	AICDA
AIFM1	0.880629	1.0669	0.692636	0.82541	0.649205	0.786525	0.844189	1.25138	0.682391	AIFM1	0.880629	1.0669	0.692636	0.82541	0.649205	0.786525	0.844189	1.25138	0.682391	AIFM1
AIFM3	0.87993	1.06711	0.666326	0.824592	0.624421	0.757249	0.838763	1.24263	0.659072	AIFM3	0.87993	1.06711	0.666326	0.824592	0.624421	0.757249	0.838763	1.24263	0.659072	AIFM3
AIFM3_ENST00000405089	0.886332	1.06501	0.651769	0.832232	0.611986	0.735355	0.847026	1.23402	0.644359	AIFM3_ENST00000405089	0.886332	1.06501	0.651769	0.832232	0.611986	0.735355	0.847026	1.23402	0.644359	AIFM3_ENST00000405089
AIM2	0.557631	1.10306	1.78492	0.50553	1.61815	3.2009	0.48704	1.46807	1.85557	AIM2										AIM2
AIPL1	1.09419	0.926602	1.56669	1.18086	1.69079	1.43183	1.137	0.804273	1.60447	AIPL1				1.18086	1.69079	1.43183	1.137	0.804273	1.60447	AIPL1
AIRE	0.773339	1.10342	0.805599	0.700856	0.730092	1.04171	0.708828	1.42125	0.800828	AIRE				0.700856	0.730092	1.04171	0.708828	1.42125	0.800828	AIRE
AJAP1	0.998421	1.02164	0.548939	0.97727	0.53731	0.549807	0.997796	1.07183	0.54092	AJAP1	0.998421	1.02164	0.548939	0.97727	0.53731	0.549807	0.997796	1.07183	0.54092	AJAP1
AK5	0.886329	1.0645	0.726118	0.832622	0.682119	0.819242	0.853356	1.24225	0.714283	AK5	0.886329	1.0645	0.726118	0.832622	0.682119	0.819242	0.853356	1.24225	0.714283	AK5
AK7	0.958206	1.0495	0.541031	0.91301	0.515513	0.56463	0.94479	1.18264	0.527792	AK7	0.958206	1.0495	0.541031	0.91301	0.515513	0.56463	0.94479	1.18264	0.527792	AK7
AK8	0.815496	1.06849	1.16835	0.763223	1.09346	1.43268	0.759245	1.24428	1.1766	AK8	0.815496	1.06849	1.16835	0.763223	1.09346	1.43268	0.759245	1.24428	1.1766	AK8
AKAP1	0.760468	1.06549	1.4994	0.713726	1.40724	1.97168	0.697613	1.24286	1.53229	AKAP1	0.760468	1.06549	1.4994	0.713726	1.40724	1.97168	0.697613	1.24286	1.53229	AKAP1
AKAP1_ENST00000314126	0.568596	1.11165	2.10811	0.511489	1.89638	3.70757	0.489257	1.47916	2.20142	AKAP1_ENST00000314126										AKAP1_ENST00000314126
AKAP11	0.791727	1.03487	1.404	0.765052	1.3567	1.77334	0.746981	1.13902	1.43627	AKAP11	0.791727	1.03487	1.404	0.765052	1.3567	1.77334	0.746981	1.13902	1.43627	AKAP11
AKAP12	1.22045	0.967381	0.466368	1.2616	0.482094	0.382128	1.31039	0.896561	0.452366	AKAP12										AKAP12
AKAP12_ENST00000359755	1.10509	1.00625	0.479621	1.09822	0.476641	0.434011	1.14181	1.02189	0.465299	AKAP12_ENST00000359755	1.10509	1.00625	0.479621	1.09822	0.476641	0.434011	1.14181	1.02189	0.465299	AKAP12_ENST00000359755
AKAP13	0.955133	1.01201	1.06026	0.943796	1.04767	1.11006	0.941112	1.04204	1.06327	AKAP13	0.955133	1.01201	1.06026	0.943796	1.04767	1.11006	0.941112	1.04204	1.06327	AKAP13
AKAP13_ENST00000394518	0.983444	1.00144	1.06961	0.982035	1.06808	1.08762	0.978071	1.0049	1.07311	AKAP13_ENST00000394518	0.983444	1.00144	1.06961	0.982035	1.06808	1.08762	0.978071	1.0049	1.07311	AKAP13_ENST00000394518
AKAP17A	0.917561	1.06805	0.325816	0.859099	0.305057	0.35509	0.889442	1.25593	0.317931	AKAP17A				0.859099	0.305057	0.35509	0.889442	1.25593	0.317931	AKAP17A
AKAP17A_ENST00000381261	1.03237	1.01739	0.451113	1.01472	0.443402	0.43697	1.04578	1.05604	0.441483	AKAP17A_ENST00000381261	1.03237	1.01739	0.451113	1.01472	0.443402	0.43697	1.04578	1.05604	0.441483	AKAP17A_ENST00000381261
AKAP2	0.788385	1.07537	1.05963	0.733131	0.985363	1.34405	0.733775	1.29892	1.06257	AKAP2	0.788385	1.07537	1.05963	0.733131	0.985363	1.34405	0.733775	1.29892	1.06257	AKAP2
AKAP3	0.714984	1.06835	1.57866	0.669244	1.47767	2.20797	0.650855	1.27008	1.6218	AKAP3	0.714984	1.06835	1.57866	0.669244	1.47767	2.20797	0.650855	1.27008	1.6218	AKAP3
AKAP3_ENST00000545990	0.751807	1.06198	1.46467	0.707928	1.37919	1.9482	0.692399	1.2407	1.49665	AKAP3_ENST00000545990	0.751807	1.06198	1.46467	0.707928	1.37919	1.9482	0.692399	1.2407	1.49665	AKAP3_ENST00000545990
AKAP4	1.06368	0.981512	0.945175	1.08372	0.962979	0.888588	1.08638	0.940323	0.942468	AKAP4	1.06368	0.981512	0.945175	1.08372	0.962979	0.888588	1.08638	0.940323	0.942468	AKAP4
AKAP6	0.884326	1.02004	1.24192	0.86695	1.21752	1.40437	0.854219	1.07376	1.2588	AKAP6	0.884326	1.02004	1.24192	0.86695	1.21752	1.40437	0.854219	1.07376	1.2588	AKAP6
AKAP8	0.739544	1.12255	0.579899	0.658807	0.51659	0.78413	0.676807	1.56307	0.569776	AKAP8				0.658807	0.51659	0.78413	0.676807	1.56307	0.569776	AKAP8
AKAP8L	1.02891	1.02942	0.363698	0.999506	0.353305	0.353479	1.03928	1.10506	0.353352	AKAP8L				0.999506	0.353305	0.353479	1.03928	1.10506	0.353352	AKAP8L
AKAP9	0.936325	1.02763	0.919264	0.911154	0.894551	0.981779	0.920762	1.10297	0.91301	AKAP9	0.936325	1.02763	0.919264	0.911154	0.894551	0.981779	0.920762	1.10297	0.91301	AKAP9
AKNA	0.887803	1.00993	1.59318	0.879076	1.57752	1.79453	0.851899	1.0324	1.63373	AKNA	0.887803	1.00993	1.59318	0.879076	1.57752	1.79453	0.851899	1.0324	1.63373	AKNA
AKNAD1	0.848829	1.07651	0.725965	0.788501	0.67437	0.855255	0.812633	1.31315	0.711197	AKNAD1	0.848829	1.07651	0.725965	0.788501	0.67437	0.855255	0.812633	1.31315	0.711197	AKNAD1
AKNAD1_ENST00000369995	0.848447	1.06806	0.810113	0.794381	0.758489	0.954818	0.812028	1.27225	0.798795	AKNAD1_ENST00000369995	0.848447	1.06806	0.810113	0.794381	0.758489	0.954818	0.812028	1.27225	0.798795	AKNAD1_ENST00000369995
AKR1D1	0.816958	1.10123	0.60215	0.741862	0.5468	0.737064	0.766213	1.40807	0.589419	AKR1D1				0.741862	0.5468	0.737064	0.766213	1.40807	0.589419	AKR1D1
AKT2	0.674612	1.16012	0.444259	0.581503	0.382943	0.658539	0.599523	1.78827	0.435437	AKT2										AKT2
AKT3	0.594896	1.08743	1.43012	0.547065	1.31513	2.40398	0.533636	1.39681	1.47213	AKT3										AKT3
AKT3_ENST00000336199	0.563735	1.09399	1.45872	0.515302	1.33339	2.58759	0.50174	1.43395	1.50529	AKT3_ENST00000336199										AKT3_ENST00000336199
AKT3_ENST00000366539	0.595906	1.08277	1.4803	0.550355	1.36714	2.48411	0.53468	1.37002	1.52902	AKT3_ENST00000366539										AKT3_ENST00000366539
ALAS1	0.804091	1.11775	0.217353	0.719383	0.194455	0.270308	0.751427	1.53441	0.210663	ALAS1							0.751427	1.53441	0.210663	ALAS1
ALAS2	0.703845	1.13875	0.64146	0.618084	0.5633	0.911364	0.631153	1.63364	0.633432	ALAS2										ALAS2
ALAS2_ENST00000396198	0.706164	1.12537	0.880224	0.627496	0.782166	1.24649	0.634091	1.55162	0.876481	ALAS2_ENST00000396198										ALAS2_ENST00000396198
ALB	1.0188	0.987819	1.08599	1.03137	1.09938	1.06595	1.02482	0.958803	1.09082	ALB	1.0188	0.987819	1.08599	1.03137	1.09938	1.06595	1.02482	0.958803	1.09082	ALB
ALCAM	0.829848	1.06014	1.00668	0.782772	0.949571	1.21309	0.785394	1.23388	1.00703	ALCAM	0.829848	1.06014	1.00668	0.782772	0.949571	1.21309	0.785394	1.23388	1.00703	ALCAM
ALDH16A1	0.87191	1.03282	1.42695	0.844204	1.38161	1.63658	0.828342	1.10776	1.44978	ALDH16A1	0.87191	1.03282	1.42695	0.844204	1.38161	1.63658	0.828342	1.10776	1.44978	ALDH16A1
ALDH18A1	0.970913	1.01621	0.908014	0.955426	0.89353	0.935217	0.9606	1.05489	0.904821	ALDH18A1	0.970913	1.01621	0.908014	0.955426	0.89353	0.935217	0.9606	1.05489	0.904821	ALDH18A1
ALDH1A1	0.983415	0.999335	1.10025	0.984069	1.10098	1.1188	0.977791	0.997822	1.10574	ALDH1A1	0.983415	0.999335	1.10025	0.984069	1.10098	1.1188	0.977791	0.997822	1.10574	ALDH1A1
ALDH1A2	1.1029	0.940432	1.31466	1.17276	1.39793	1.192	1.14615	0.830791	1.33337	ALDH1A2				1.17276	1.39793	1.192	1.14615	0.830791	1.33337	ALDH1A2
ALDH1A3	0.835838	1.07515	0.883995	0.777417	0.822208	1.05762	0.784647	1.27782	0.880062	ALDH1A3	0.835838	1.07515	0.883995	0.777417	0.822208	1.05762	0.784647	1.27782	0.880062	ALDH1A3
ALDH1B1	0.830591	1.11526	0.195084	0.744753	0.174923	0.234873	0.776688	1.46423	0.189494	ALDH1B1							0.776688	1.46423	0.189494	ALDH1B1
ALDH1L1	1.0319	0.954342	1.66375	1.08127	1.74334	1.61231	1.04529	0.869741	1.70237	ALDH1L1	1.0319	0.954342	1.66375	1.08127	1.74334	1.61231	1.04529	0.869741	1.70237	ALDH1L1
ALDH1L2	0.762679	1.05867	1.4607	0.720415	1.37976	1.91523	0.7041	1.22226	1.49325	ALDH1L2	0.762679	1.05867	1.4607	0.720415	1.37976	1.91523	0.7041	1.22226	1.49325	ALDH1L2
ALDH2	0.963909	1.03499	0.646873	0.931326	0.625007	0.671094	0.950375	1.11759	0.637895	ALDH2	0.963909	1.03499	0.646873	0.931326	0.625007	0.671094	0.950375	1.11759	0.637895	ALDH2
ALDH3A1	0.718129	1.11372	1.1465	0.644802	1.02944	1.59651	0.643789	1.45096	1.15316	ALDH3A1				0.644802	1.02944	1.59651	0.643789	1.45096	1.15316	ALDH3A1
ALDH3B2	1.15029	0.955935	0.585611	1.20332	0.612605	0.509097	1.22786	0.878174	0.576602	ALDH3B2										ALDH3B2
ALDH4A1	1.03261	0.962096	1.45105	1.07329	1.50822	1.40522	1.04715	0.894222	1.47479	ALDH4A1	1.03261	0.962096	1.45105	1.07329	1.50822	1.40522	1.04715	0.894222	1.47479	ALDH4A1
ALDH5A1	1.01646	1.00396	0.807405	1.01245	0.80422	0.794334	1.02293	1.01266	0.80134	ALDH5A1	1.01646	1.00396	0.807405	1.01245	0.80422	0.794334	1.02293	1.01266	0.80134	ALDH5A1
ALDH6A1	0.952448	1.01983	0.979849	0.933931	0.9608	1.02877	0.935963	1.06675	0.979018	ALDH6A1	0.952448	1.01983	0.979849	0.933931	0.9608	1.02877	0.935963	1.06675	0.979018	ALDH6A1
ALDH8A1	1.01775	1.02483	0.436067	0.993089	0.425502	0.428463	1.02464	1.08371	0.426344	ALDH8A1	1.01775	1.02483	0.436067	0.993089	0.425502	0.428463	1.02464	1.08371	0.426344	ALDH8A1
ALDOB	0.885664	1.01854	1.48019	0.86954	1.45324	1.67128	0.847552	1.05966	1.51128	ALDOB	0.885664	1.01854	1.48019	0.86954	1.45324	1.67128	0.847552	1.05966	1.51128	ALDOB
ALG1	0.781212	1.03138	2.01607	0.757447	1.95474	2.58069	0.719503	1.10459	2.10442	ALG1										ALG1
ALG10	0.739557	1.1116	0.78267	0.66531	0.704094	1.0583	0.679873	1.48773	0.773054	ALG10				0.66531	0.704094	1.0583	0.679873	1.48773	0.773054	ALG10
ALG10B	1.11027	1.00155	0.453818	1.10855	0.453116	0.408747	1.15315	1.0051	0.440388	ALG10B	1.11027	1.00155	0.453818	1.10855	0.453116	0.408747	1.15315	1.0051	0.440388	ALG10B
ALG13_ENST00000251943	0.778864	1.05009	1.30959	0.741714	1.24713	1.68141	0.728537	1.19381	1.33399	ALG13_ENST00000251943	0.778864	1.05009	1.30959	0.741714	1.24713	1.68141	0.728537	1.19381	1.33399	ALG13_ENST00000251943
ALK	0.491093	1.22339	0.911223	0.401421	0.744837	1.8555	0.407266	2.25555	0.907861	ALK										ALK	0.491093	1.22339	0.911223
ALKBH8_ENST00000428149	0.735457	1.02855	1.77454	0.715039	1.72527	2.41284	0.680087	1.10606	1.85694	ALKBH8_ENST00000428149				0.715039	1.72527	2.41284	0.680087	1.10606	1.85694	ALKBH8_ENST00000428149
ALLC	0.886941	1.08382	0.442363	0.818351	0.408154	0.498751	0.852914	1.33033	0.429593	ALLC	0.886941	1.08382	0.442363	0.818351	0.408154	0.498751	0.852914	1.33033	0.429593	ALLC
ALOX12	0.791444	1.07082	1.2165	0.739099	1.13604	1.53707	0.732419	1.25347	1.23003	ALOX12	0.791444	1.07082	1.2165	0.739099	1.13604	1.53707	0.732419	1.25347	1.23003	ALOX12
ALOX12B	0.806857	1.07694	1.11586	0.749213	1.03614	1.38298	0.747667	1.27494	1.12136	ALOX12B	0.806857	1.07694	1.11586	0.749213	1.03614	1.38298	0.747667	1.27494	1.12136	ALOX12B
ALOX15	1.15721	0.943476	0.853629	1.22654	0.90477	0.73766	1.23334	0.843728	0.848247	ALOX15										ALOX15
ALOX15B	1.04611	0.990808	0.816266	1.05582	0.823839	0.780286	1.06637	0.972778	0.810101	ALOX15B	1.04611	0.990808	0.816266	1.05582	0.823839	0.780286	1.06637	0.972778	0.810101	ALOX15B
ALOX5	0.884514	1.04182	1.10187	0.849005	1.05763	1.24573	0.845796	1.13802	1.10745	ALOX5	0.884514	1.04182	1.10187	0.849005	1.05763	1.24573	0.845796	1.13802	1.10745	ALOX5
ALOXE3	0.912167	1.07338	0.420678	0.849809	0.391919	0.461186	0.881708	1.2664	0.410081	ALOXE3	0.912167	1.07338	0.420678	0.849809	0.391919	0.461186	0.881708	1.2664	0.410081	ALOXE3
ALPI	1.12021	0.928613	1.38013	1.20632	1.48623	1.23203	1.17791	0.808601	1.39957	ALPI							1.17791	0.808601	1.39957	ALPI
ALPK1	0.917347	1.02251	1.09771	0.897151	1.07354	1.19661	0.892632	1.07849	1.10357	ALPK1	0.917347	1.02251	1.09771	0.897151	1.07354	1.19661	0.892632	1.07849	1.10357	ALPK1
ALPK2	0.904319	1.03532	0.965337	0.87347	0.932407	1.06747	0.877504	1.13146	0.963522	ALPK2	0.904319	1.03532	0.965337	0.87347	0.932407	1.06747	0.877504	1.13146	0.963522	ALPK2
ALPK3	0.97913	1.01728	0.843906	0.962498	0.829571	0.861894	0.971371	1.05689	0.838628	ALPK3	0.97913	1.01728	0.843906	0.962498	0.829571	0.861894	0.971371	1.05689	0.838628	ALPK3
ALPL	1.26757	0.901203	0.694065	1.40653	0.770154	0.547556	1.42113	0.744539	0.687152	ALPL										ALPL
ALPP	0.949071	1.02867	0.848244	0.922621	0.824604	0.893763	0.929483	1.0946	0.844313	ALPP	0.949071	1.02867	0.848244	0.922621	0.824604	0.893763	0.929483	1.0946	0.844313	ALPP
ALS2	0.993763	1.00083	1.01953	0.992935	1.01868	1.02592	0.991694	1.00278	1.02058	ALS2	0.993763	1.00083	1.01953	0.992935	1.01868	1.02592	0.991694	1.00278	1.02058	ALS2
ALS2CL	1.05293	0.96779	1.15759	1.08797	1.19612	1.0994	1.07495	0.906736	1.16616	ALS2CL	1.05293	0.96779	1.15759	1.08797	1.19612	1.0994	1.07495	0.906736	1.16616	ALS2CL
ALX1	0.76689	1.07003	1.15844	0.716702	1.08263	1.51057	0.713095	1.29048	1.16741	ALX1	0.76689	1.07003	1.15844	0.716702	1.08263	1.51057	0.713095	1.29048	1.16741	ALX1
ALX4	1.01237	0.960212	1.56284	1.05432	1.6276	1.54375	1.01702	0.882977	1.60304	ALX4	1.01237	0.960212	1.56284	1.05432	1.6276	1.54375	1.01702	0.882977	1.60304	ALX4
AMACR	0.862216	1.05343	1.03423	0.818481	0.981772	1.1995	0.819271	1.19275	1.03564	AMACR	0.862216	1.05343	1.03423	0.818481	0.981772	1.1995	0.819271	1.19275	1.03564	AMACR
AMBN	0.971599	0.987592	1.34252	0.983806	1.35938	1.38176	0.962132	0.960294	1.36535	AMBN	0.971599	0.987592	1.34252	0.983806	1.35938	1.38176	0.962132	0.960294	1.36535	AMBN
AMBP	1.18565	0.927135	0.948762	1.27884	1.02333	0.800201	1.2771	0.803068	0.946627	AMBP										AMBP
AMBRA1_ENST00000458649	0.852593	0.963064	2.60566	0.885292	2.70559	3.05616	0.808842	0.889582	2.7953	AMBRA1_ENST00000458649										AMBRA1_ENST00000458649	0.852593	0.963064	2.60566
AMDHD1	0.975332	1.00217	1.12719	0.973216	1.12474	1.1557	0.966713	1.00716	1.13313	AMDHD1	0.975332	1.00217	1.12719	0.973216	1.12474	1.1557	0.966713	1.00716	1.13313	AMDHD1
AMFR	0.805518	1.00757	2.10098	0.79947	2.08521	2.60824	0.752808	1.02509	2.20753	AMFR										AMFR
AMHR2	0.886948	0.985759	1.94072	0.899761	1.96876	2.18809	0.848955	0.957795	2.02911	AMHR2							0.848955	0.957795	2.02911	AMHR2
AMIGO2	0.963488	0.971092	1.93857	0.99217	1.99628	2.01204	0.950521	0.910814	2.00068	AMIGO2							0.950521	0.910814	2.00068	AMIGO2
AMOT	0.726529	1.08412	1.33948	0.670153	1.23554	1.84367	0.660115	1.32528	1.36239	AMOT	0.726529	1.08412	1.33948	0.670153	1.23554	1.84367	0.660115	1.32528	1.36239	AMOT
AMOT_ENST00000371958	0.786942	1.02336	1.73977	0.768981	1.70006	2.2108	0.731581	1.07786	1.8163	AMOT_ENST00000371958				0.768981	1.70006	2.2108	0.731581	1.07786	1.8163	AMOT_ENST00000371958
AMOTL1	0.867289	1.06201	0.839406	0.816647	0.790393	0.967851	0.827476	1.23033	0.832983	AMOTL1	0.867289	1.06201	0.839406	0.816647	0.790393	0.967851	0.827476	1.23033	0.832983	AMOTL1
AMOTL2	0.914592	0.976451	1.95804	0.93665	2.00526	2.14088	0.885542	0.929709	2.04272	AMOTL2										AMOTL2
AMPD1	0.784697	1.09914	0.725646	0.713922	0.660197	0.924746	0.729596	1.417	0.716	AMPD1	0.784697	1.09914	0.725646	0.713922	0.660197	0.924746	0.729596	1.417	0.716	AMPD1
AMPD2_ENST00000393688	0.788698	1.1264	0.439812	0.700193	0.390458	0.557643	0.726853	1.51532	0.429039	AMPD2_ENST00000393688				0.700193	0.390458	0.557643	0.726853	1.51532	0.429039	AMPD2_ENST00000393688
AMPD3	0.671709	1.14687	0.818031	0.585689	0.713272	1.21783	0.595499	1.66092	0.811662	AMPD3										AMPD3
AMPH	0.728379	1.0798	1.34472	0.674547	1.24534	1.84618	0.66388	1.31082	1.36863	AMPH	0.728379	1.0798	1.34472	0.674547	1.24534	1.84618	0.66388	1.31082	1.36863	AMPH
AMY2B	0.958865	1.00243	1.13829	0.956536	1.13553	1.18712	0.947617	1.00882	1.14733	AMY2B	0.958865	1.00243	1.13829	0.956536	1.13553	1.18712	0.947617	1.00882	1.14733	AMY2B
AMZ1	1.18864	0.91823	1.10573	1.29449	1.20419	0.930246	1.28187	0.778539	1.10996	AMZ1										AMZ1
ANAPC1	0.883917	1.05558	0.781464	0.837374	0.740317	0.884093	0.851742	1.21769	0.772762	ANAPC1	0.883917	1.05558	0.781464	0.837374	0.740317	0.884093	0.851742	1.21769	0.772762	ANAPC1
ANAPC2	0.84305	1.07855	0.776284	0.781652	0.719749	0.920804	0.793434	1.29134	0.769505	ANAPC2	0.84305	1.07855	0.776284	0.781652	0.719749	0.920804	0.793434	1.29134	0.769505	ANAPC2
ANAPC4	1.06129	0.952929	1.36	1.11371	1.42718	1.28146	1.08071	0.850942	1.38927	ANAPC4	1.06129	0.952929	1.36	1.11371	1.42718	1.28146	1.08071	0.850942	1.38927	ANAPC4
ANAPC5	0.93104	0.999585	1.4002	0.931426	1.40078	1.50391	0.908253	0.998677	1.42819	ANAPC5	0.93104	0.999585	1.4002	0.931426	1.40078	1.50391	0.908253	0.998677	1.42819	ANAPC5
ANAPC7	0.697	1.04091	2.11532	0.669605	2.03218	3.03489	0.630058	1.14813	2.23272	ANAPC7										ANAPC7
ANGEL1	0.743394	1.06312	1.55297	0.699256	1.46077	2.08903	0.678643	1.2286	1.59756	ANGEL1	0.743394	1.06312	1.55297	0.699256	1.46077	2.08903	0.678643	1.2286	1.59756	ANGEL1
ANGPT2	1.17604	0.978724	0.573969	1.20161	0.586446	0.488051	1.24741	0.934921	0.556927	ANGPT2										ANGPT2
ANGPT4	0.92678	1.04303	0.824613	0.888547	0.790594	0.889761	0.901532	1.14467	0.81711	ANGPT4	0.92678	1.04303	0.824613	0.888547	0.790594	0.889761	0.901532	1.14467	0.81711	ANGPT4
ANGPTL1	0.903376	1.0689	0.655709	0.845148	0.613445	0.725843	0.876171	1.25984	0.639314	ANGPTL1	0.903376	1.0689	0.655709	0.845148	0.613445	0.725843	0.876171	1.25984	0.639314	ANGPTL1
ANGPTL2	1.28855	0.832278	1.57452	1.54822	1.89181	1.22193	1.45344	0.624178	1.62627	ANGPTL2										ANGPTL2	1.28855	0.832278	1.57452	1.54822	1.89181	1.22193
ANGPTL4	1.06636	0.979882	0.898819	1.08825	0.917272	0.842885	1.09363	0.939055	0.89473	ANGPTL4	1.06636	0.979882	0.898819	1.08825	0.917272	0.842885	1.09363	0.939055	0.89473	ANGPTL4
ANGPTL5	0.877997	1.001	1.4602	0.877124	1.45875	1.6631	0.849843	1.00372	1.50041	ANGPTL5	0.877997	1.001	1.4602	0.877124	1.45875	1.6631	0.849843	1.00372	1.50041	ANGPTL5
ANK1	0.960153	1.03159	0.71684	0.930753	0.69489	0.746589	0.945319	1.10626	0.70929	ANK1	0.960153	1.03159	0.71684	0.930753	0.69489	0.746589	0.945319	1.10626	0.70929	ANK1
ANK2	0.876741	1.04814	0.907857	0.836477	0.866163	1.03549	0.843389	1.18873	0.903808	ANK2	0.876741	1.04814	0.907857	0.836477	0.866163	1.03549	0.843389	1.18873	0.903808	ANK2
ANK2_ENST00000506722	0.888617	1.04522	0.938101	0.850175	0.897518	1.05569	0.855017	1.16743	0.935634	ANK2_ENST00000506722	0.888617	1.04522	0.938101	0.850175	0.897518	1.05569	0.855017	1.16743	0.935634	ANK2_ENST00000506722
ANK3	0.9505	1.00665	1.15061	0.944221	1.14301	1.21053	0.935971	1.02367	1.1592	ANK3	0.9505	1.00665	1.15061	0.944221	1.14301	1.21053	0.935971	1.02367	1.1592	ANK3
ANK3_ENST00000355288	0.86409	0.981742	2.01533	0.88016	2.05281	2.33231	0.828324	0.938987	2.11686	ANK3_ENST00000355288										ANK3_ENST00000355288
ANKAR	0.68946	1.11713	0.841496	0.61717	0.753265	1.22052	0.628632	1.55458	0.833607	ANKAR										ANKAR
ANKFN1	1.19611	0.976838	0.407603	1.22447	0.417268	0.340775	1.27863	0.927272	0.394096	ANKFN1										ANKFN1
ANKFY1	0.833538	1.0399	1.5399	0.801556	1.48081	1.84742	0.783503	1.14027	1.57031	ANKFY1	0.833538	1.0399	1.5399	0.801556	1.48081	1.84742	0.783503	1.14027	1.57031	ANKFY1
ANKH	1.07104	0.970029	0.992921	1.10413	1.0236	0.927065	1.10305	0.911799	0.992708	ANKH	1.07104	0.970029	0.992921	1.10413	1.0236	0.927065	1.10305	0.911799	0.992708	ANKH
ANKHD1	0.767168	1.0805	1.00012	0.710011	0.925607	1.30365	0.713083	1.34671	1.00013	ANKHD1	0.767168	1.0805	1.00012	0.710011	0.925607	1.30365	0.713083	1.34671	1.00013	ANKHD1
ANKHD1-EIF4EBP3	0.766451	1.08243	0.984666	0.708084	0.909681	1.28471	0.711805	1.35453	0.983979	ANKHD1-EIF4EBP3	0.766451	1.08243	0.984666	0.708084	0.909681	1.28471	0.711805	1.35453	0.983979	ANKHD1-EIF4EBP3
ANKIB1	0.940576	1.04902	0.577656	0.89662	0.55066	0.614151	0.924404	1.2011	0.564661	ANKIB1	0.940576	1.04902	0.577656	0.89662	0.55066	0.614151	0.924404	1.2011	0.564661	ANKIB1
ANKK1	0.955434	0.984915	1.61267	0.970067	1.63737	1.6879	0.938859	0.954471	1.65195	ANKK1	0.955434	0.984915	1.61267	0.970067	1.63737	1.6879	0.938859	0.954471	1.65195	ANKK1
ANKLE1	0.917405	1.02351	1.21541	0.89633	1.18749	1.32484	0.887907	1.07658	1.22529	ANKLE1	0.917405	1.02351	1.21541	0.89633	1.18749	1.32484	0.887907	1.07658	1.22529	ANKLE1
ANKLE2	1.00193	0.965409	1.55178	1.03783	1.60738	1.54879	1.00263	0.896228	1.5906	ANKLE2	1.00193	0.965409	1.55178	1.03783	1.60738	1.54879	1.00263	0.896228	1.5906	ANKLE2
ANKMY1	1.15549	0.916959	1.34234	1.26014	1.4639	1.1617	1.22905	0.777956	1.36144	ANKMY1										ANKMY1
ANKMY1_ENST00000361678	1.27226	0.856762	1.59867	1.48497	1.86595	1.25656	1.41905	0.652697	1.63834	ANKMY1_ENST00000361678										ANKMY1_ENST00000361678	1.27226	0.856762	1.59867	1.48497	1.86595	1.25656
ANKRD11	0.838049	1.05912	1.08111	0.791268	1.02076	1.29003	0.790403	1.2199	1.08462	ANKRD11	0.838049	1.05912	1.08111	0.791268	1.02076	1.29003	0.790403	1.2199	1.08462	ANKRD11
ANKRD12	0.802823	1.0422	1.15386	0.770316	1.10714	1.43725	0.763874	1.17797	1.16583	ANKRD12	0.802823	1.0422	1.15386	0.770316	1.10714	1.43725	0.763874	1.17797	1.16583	ANKRD12
ANKRD13B	0.844812	1.11662	0	0.756583	0	0	0.797062	1.49561	0	ANKRD13B										ANKRD13B
ANKRD13C	0.942189	1.0021	1.20675	0.940214	1.20422	1.2808	0.924783	1.00687	1.22337	ANKRD13C	0.942189	1.0021	1.20675	0.940214	1.20422	1.2808	0.924783	1.00687	1.22337	ANKRD13C
ANKRD13D	0.809648	1.08265	0.84282	0.747837	0.778476	1.04097	0.756349	1.33061	0.837749	ANKRD13D	0.809648	1.08265	0.84282	0.747837	0.778476	1.04097	0.756349	1.33061	0.837749	ANKRD13D
ANKRD17	1.03953	1.01504	0.525089	1.02413	0.51731	0.505124	1.0533	1.05349	0.514087	ANKRD17	1.03953	1.01504	0.525089	1.02413	0.51731	0.505124	1.0533	1.05349	0.514087	ANKRD17
ANKRD18A	1.13079	0.968912	0.862229	1.16707	0.889894	0.762501	1.17707	0.900517	0.854804	ANKRD18A				1.16707	0.889894	0.762501	1.17707	0.900517	0.854804	ANKRD18A
ANKRD18B	1.31583	0.922452	0.720653	1.42645	0.781237	0.547679	1.45084	0.773413	0.708169	ANKRD18B										ANKRD18B
ANKRD20A4	0.842216	1.10073	0.414275	0.765145	0.376365	0.491887	0.805267	1.46766	0.398861	ANKRD20A4	0.842216	1.10073	0.414275	0.765145	0.376365	0.491887	0.805267	1.46766	0.398861	ANKRD20A4
ANKRD24	1.06311	0.944597	1.53477	1.12546	1.62479	1.44366	1.08906	0.842155	1.56866	ANKRD24				1.12546	1.62479	1.44366	1.08906	0.842155	1.56866	ANKRD24
ANKRD24_ENST00000262970	1.07094	0.947976	1.42614	1.12971	1.5044	1.33167	1.10076	0.851264	1.45037	ANKRD24_ENST00000262970				1.12971	1.5044	1.33167	1.10076	0.851264	1.45037	ANKRD24_ENST00000262970
ANKRD24_ENST00000318934	1.02411	0.957534	1.58114	1.06953	1.65126	1.54391	1.03352	0.875867	1.61916	ANKRD24_ENST00000318934	1.02411	0.957534	1.58114	1.06953	1.65126	1.54391	1.03352	0.875867	1.61916	ANKRD24_ENST00000318934
ANKRD26	0.912223	1.03817	0.874196	0.878682	0.842053	0.958315	0.890658	1.14937	0.866403	ANKRD26	0.912223	1.03817	0.874196	0.878682	0.842053	0.958315	0.890658	1.14937	0.866403	ANKRD26
ANKRD26_ENST00000436985	0.720253	1.09977	0.842107	0.654913	0.765713	1.16918	0.668341	1.4683	0.832648	ANKRD26_ENST00000436985	0.720253	1.09977	0.842107	0.654913	0.765713	1.16918	0.668341	1.4683	0.832648	ANKRD26_ENST00000436985
ANKRD27	1.11875	0.973071	0.700945	1.14971	0.720344	0.626544	1.16955	0.918579	0.691337	ANKRD27	1.11875	0.973071	0.700945	1.14971	0.720344	0.626544	1.16955	0.918579	0.691337	ANKRD27
ANKRD30A	1.11426	1.00466	0.569455	1.10908	0.566812	0.511064	1.15014	1.01691	0.552978	ANKRD30A	1.11426	1.00466	0.569455	1.10908	0.566812	0.511064	1.15014	1.01691	0.552978	ANKRD30A
ANKRD30A_ENST00000602533	1.10293	1.01127	0.533398	1.09064	0.527452	0.483617	1.13483	1.04158	0.516711	ANKRD30A_ENST00000602533	1.10293	1.01127	0.533398	1.09064	0.527452	0.483617	1.13483	1.04158	0.516711	ANKRD30A_ENST00000602533
ANKRD30B	1.05379	0.996565	0.846252	1.05742	0.849169	0.803056	1.07	0.987865	0.837909	ANKRD30B	1.05379	0.996565	0.846252	1.05742	0.849169	0.803056	1.07	0.987865	0.837909	ANKRD30B
ANKRD33	1.2856	0.864532	1.36886	1.48705	1.58336	1.06477	1.43911	0.666748	1.39112	ANKRD33										ANKRD33	1.2856	0.864532	1.36886	1.48705	1.58336	1.06477
ANKRD34A	0.997824	1.00813	0.835893	0.989773	0.829149	0.837716	0.996887	1.02501	0.831791	ANKRD34A	0.997824	1.00813	0.835893	0.989773	0.829149	0.837716	0.996887	1.02501	0.831791	ANKRD34A
ANKRD34B	0.846067	1.06546	0.843449	0.794084	0.791627	0.996906	0.805485	1.25998	0.836387	ANKRD34B	0.846067	1.06546	0.843449	0.794084	0.791627	0.996906	0.805485	1.25998	0.836387	ANKRD34B
ANKRD34C	1.24903	0.847813	2.23272	1.47324	2.6335	1.78756	1.37044	0.622703	2.33358	ANKRD34C										ANKRD34C	1.24903	0.847813	2.23272	1.47324	2.6335	1.78756
ANKRD35	0.908516	1.0761	0.55841	0.844265	0.518918	0.614639	0.877029	1.26499	0.544216	ANKRD35	0.908516	1.0761	0.55841	0.844265	0.518918	0.614639	0.877029	1.26499	0.544216	ANKRD35
ANKRD36	0.83937	1.02919	1.26841	0.815562	1.23244	1.51115	0.80189	1.11174	1.28926	ANKRD36	0.83937	1.02919	1.26841	0.815562	1.23244	1.51115	0.80189	1.11174	1.28926	ANKRD36
ANKRD36C	0.764099	1.10512	0.614951	0.691419	0.556458	0.804806	0.71538	1.50731	0.600557	ANKRD36C				0.691419	0.556458	0.804806	0.71538	1.50731	0.600557	ANKRD36C
ANKRD44	0.947233	1.03046	0.789923	0.919229	0.76657	0.833927	0.929913	1.11044	0.783708	ANKRD44	0.947233	1.03046	0.789923	0.919229	0.76657	0.833927	0.929913	1.11044	0.783708	ANKRD44
ANKRD50	0.718562	1.07443	1.2054	0.668785	1.12189	1.67751	0.662984	1.3214	1.22007	ANKRD50	0.718562	1.07443	1.2054	0.668785	1.12189	1.67751	0.662984	1.3214	1.22007	ANKRD50
ANKRD52	0.883892	1.03016	1.46638	0.858018	1.42345	1.659	0.844262	1.10235	1.4859	ANKRD52	0.883892	1.03016	1.46638	0.858018	1.42345	1.659	0.844262	1.10235	1.4859	ANKRD52
ANKRD55	1.05131	0.950654	1.50247	1.10588	1.58046	1.42914	1.0707	0.853636	1.53617	ANKRD55	1.05131	0.950654	1.50247	1.10588	1.58046	1.42914	1.0707	0.853636	1.53617	ANKRD55
ANKRD6	0.960357	1.04355	0.539518	0.92028	0.517003	0.561788	0.946871	1.15726	0.52864	ANKRD6	0.960357	1.04355	0.539518	0.92028	0.517003	0.561788	0.946871	1.15726	0.52864	ANKRD6
ANKS1A	1.02885	0.998215	0.812817	1.03069	0.81427	0.790021	1.04026	0.994288	0.807193	ANKS1A	1.02885	0.998215	0.812817	1.03069	0.81427	0.790021	1.04026	0.994288	0.807193	ANKS1A
ANKS1B	0.999847	0.977741	1.32617	1.02261	1.35636	1.32637	0.999797	0.927915	1.34852	ANKS1B	0.999847	0.977741	1.32617	1.02261	1.35636	1.32637	0.999797	0.927915	1.34852	ANKS1B
ANKS1B_ENST00000329257	1.00984	0.986579	1.13757	1.02357	1.15304	1.12649	1.01299	0.955544	1.14619	ANKS1B_ENST00000329257	1.00984	0.986579	1.13757	1.02357	1.15304	1.12649	1.01299	0.955544	1.14619	ANKS1B_ENST00000329257
ANKS1B_ENST00000549493	1.16907	0.966266	0.632745	1.20989	0.654835	0.541237	1.24177	0.899501	0.619439	ANKS1B_ENST00000549493										ANKS1B_ENST00000549493
ANKS4B	0.630551	1.14082	1.01095	0.552717	0.886158	1.60328	0.556662	1.66125	1.01148	ANKS4B										ANKS4B
ANKS6	0.978692	0.967039	1.99295	1.01205	2.06088	2.03634	0.970648	0.900639	2.05375	ANKS6										ANKS6
ANKZF1	0.84284	1.06544	0.97098	0.791075	0.911344	1.15203	0.795692	1.2363	0.969575	ANKZF1	0.84284	1.06544	0.97098	0.791075	0.911344	1.15203	0.795692	1.2363	0.969575	ANKZF1
ANLN	0.783841	1.05647	1.16953	0.741942	1.10701	1.49205	0.736309	1.23085	1.18119	ANLN	0.783841	1.05647	1.16953	0.741942	1.10701	1.49205	0.736309	1.23085	1.18119	ANLN
ANO1	1.17594	0.941187	0.687667	1.24942	0.730637	0.584782	1.26795	0.840965	0.679192	ANO1										ANO1
ANO1_ENST00000316296	1.12637	0.96534	0.660098	1.16681	0.683798	0.586038	1.18718	0.901062	0.651211	ANO1_ENST00000316296				1.16681	0.683798	0.586038	1.18718	0.901062	0.651211	ANO1_ENST00000316296
ANO10	0.668362	1.12087	1.14565	0.596287	1.0221	1.71411	0.595341	1.50238	1.15497	ANO10										ANO10
ANO2	0.925654	1.01734	1.21315	0.909873	1.19247	1.31059	0.899567	1.05564	1.22483	ANO2	0.925654	1.01734	1.21315	0.909873	1.19247	1.31059	0.899567	1.05564	1.22483	ANO2
ANO2_ENST00000327087	0.93668	1.01835	1.12462	0.919805	1.10436	1.20065	0.914115	1.05899	1.13094	ANO2_ENST00000327087	0.93668	1.01835	1.12462	0.919805	1.10436	1.20065	0.914115	1.05899	1.13094	ANO2_ENST00000327087
ANO2_ENST00000546188	0.948248	1.00458	1.26988	0.943924	1.26409	1.33919	0.929494	1.01433	1.2852	ANO2_ENST00000546188	0.948248	1.00458	1.26988	0.943924	1.26409	1.33919	0.929494	1.01433	1.2852	ANO2_ENST00000546188
ANO3	0.826132	1.03501	1.33896	0.798187	1.29367	1.62076	0.779884	1.12077	1.36836	ANO3	0.826132	1.03501	1.33896	0.798187	1.29367	1.62076	0.779884	1.12077	1.36836	ANO3
ANO4	0.850198	1.02156	1.40836	0.832258	1.37864	1.6565	0.809059	1.07305	1.44369	ANO4	0.850198	1.02156	1.40836	0.832258	1.37864	1.6565	0.809059	1.07305	1.44369	ANO4
ANO5	0.78667	1.05705	1.19184	0.744213	1.12751	1.51504	0.736841	1.21912	1.2065	ANO5	0.78667	1.05705	1.19184	0.744213	1.12751	1.51504	0.736841	1.21912	1.2065	ANO5
ANO6	0.678674	1.12406	0.984532	0.60377	0.875871	1.45067	0.609406	1.53584	0.983646	ANO6										ANO6
ANO6_ENST00000425752	0.693762	1.11232	1.05831	0.623708	0.951442	1.52546	0.625924	1.47125	1.06183	ANO6_ENST00000425752										ANO6_ENST00000425752
ANO6_ENST00000441606	0.663285	1.12093	1.10083	0.591729	0.982074	1.65967	0.592546	1.51216	1.10755	ANO6_ENST00000441606										ANO6_ENST00000441606
ANO7	1.16413	0.965032	0.420092	1.20631	0.435314	0.360864	1.24568	0.899731	0.410179	ANO7										ANO7
ANO7_ENST00000402430	1.12414	0.977442	0.490819	1.15008	0.502146	0.436618	1.18266	0.933616	0.480736	ANO7_ENST00000402430	1.12414	0.977442	0.490819	1.15008	0.502146	0.436618	1.18266	0.933616	0.480736	ANO7_ENST00000402430
ANO8	0.925886	1.03989	0.828024	0.890365	0.796258	0.894305	0.899857	1.13721	0.822552	ANO8	0.925886	1.03989	0.828024	0.890365	0.796258	0.894305	0.899857	1.13721	0.822552	ANO8
ANO9	1.09694	0.976003	0.682888	1.12391	0.699679	0.622541	1.14152	0.929419	0.674757	ANO9	1.09694	0.976003	0.682888	1.12391	0.699679	0.622541	1.14152	0.929419	0.674757	ANO9
ANPEP	0.767151	1.11405	0.774812	0.688615	0.695492	1.00999	0.701178	1.45035	0.767255	ANPEP				0.688615	0.695492	1.00999	0.701178	1.45035	0.767255	ANPEP
ANTXR1	1.15662	0.935415	0.991114	1.23648	1.05955	0.856903	1.23214	0.824244	0.990723	ANTXR1										ANTXR1
ANTXR2	0.778956	1.0668	1.19492	0.730183	1.1201	1.534	0.72429	1.25828	1.20744	ANTXR2	0.778956	1.0668	1.19492	0.730183	1.1201	1.534	0.72429	1.25828	1.20744	ANTXR2
ANTXR2_ENST00000403729	0.783472	1.07613	1.06064	0.728044	0.985602	1.35377	0.728745	1.29928	1.06401	ANTXR2_ENST00000403729	0.783472	1.07613	1.06064	0.728044	0.985602	1.35377	0.728745	1.29928	1.06401	ANTXR2_ENST00000403729
ANXA10	0.513675	1.1678	1.03912	0.439865	0.889813	2.02292	0.443532	1.90764	1.04157	ANXA10										ANXA10
ANXA13	0.971304	1.01538	0.948494	0.956597	0.934132	0.976516	0.961196	1.04945	0.945759	ANXA13	0.971304	1.01538	0.948494	0.956597	0.934132	0.976516	0.961196	1.04945	0.945759	ANXA13
ANXA6	0.897623	1.0157	1.53004	0.88375	1.50639	1.70454	0.86316	1.05169	1.55903	ANXA6	0.897623	1.0157	1.53004	0.88375	1.50639	1.70454	0.86316	1.05169	1.55903	ANXA6
AOAH	0.94558	1.00725	1.17786	0.938772	1.16938	1.24565	0.928036	1.0239	1.18916	AOAH	0.94558	1.00725	1.17786	0.938772	1.16938	1.24565	0.928036	1.0239	1.18916	AOAH
AOC2	0.871453	1.07012	0.737252	0.814352	0.688945	0.846004	0.828603	1.25125	0.729386	AOC2	0.871453	1.07012	0.737252	0.814352	0.688945	0.846004	0.828603	1.25125	0.729386	AOC2
AOC3	0.782403	1.10384	0.811839	0.708804	0.735471	1.03762	0.719576	1.4043	0.805461	AOC3				0.708804	0.735471	1.03762	0.719576	1.4043	0.805461	AOC3
AOX1	0.972419	1.0604	0.228816	0.917034	0.215784	0.235306	0.963003	1.22809	0.220804	AOX1				0.917034	0.215784	0.235306	0.963003	1.22809	0.220804	AOX1
AP1B1	1.26465	0.901365	0.630436	1.40304	0.699424	0.498506	1.42218	0.749042	0.622933	AP1B1										AP1B1
AP1G1	0.860502	1.0464	1.06446	0.822346	1.01726	1.23702	0.821525	1.17551	1.06757	AP1G1	0.860502	1.0464	1.06446	0.822346	1.01726	1.23702	0.821525	1.17551	1.06757	AP1G1
AP1G2	0.724876	1.13162	0.713808	0.640565	0.630784	0.984731	0.651927	1.5636	0.706785	AP1G2							0.651927	1.5636	0.706785	AP1G2
AP1M1	1.27284	0.908289	0.484912	1.40136	0.533873	0.380968	1.43734	0.767524	0.475284	AP1M1										AP1M1
AP2A1	0.81365	1.08396	0.958909	0.750629	0.884636	1.17853	0.754423	1.31028	0.957664	AP2A1	0.81365	1.08396	0.958909	0.750629	0.884636	1.17853	0.754423	1.31028	0.957664	AP2A1
AP2A2	0.941163	1.01129	1.28283	0.930657	1.26851	1.36303	0.918534	1.03504	1.29599	AP2A2	0.941163	1.01129	1.28283	0.930657	1.26851	1.36303	0.918534	1.03504	1.29599	AP2A2
AP2M1	0.792234	1.08184	1.09373	0.732299	1.01098	1.38056	0.731837	1.30282	1.09815	AP2M1	0.792234	1.08184	1.09373	0.732299	1.01098	1.38056	0.731837	1.30282	1.09815	AP2M1
AP3B1	0.656652	1.10281	1.17855	0.595437	1.06868	1.79478	0.592917	1.48466	1.18905	AP3B1										AP3B1
AP3B2	1.07745	0.967118	1.02087	1.11408	1.05558	0.947488	1.11101	0.902966	1.02166	AP3B2	1.07745	0.967118	1.02087	1.11408	1.05558	0.947488	1.11101	0.902966	1.02166	AP3B2
AP3D1	0.986124	1.03854	0.362403	0.949526	0.348953	0.367503	0.980606	1.12974	0.354298	AP3D1				0.949526	0.348953	0.367503	0.980606	1.12974	0.354298	AP3D1
AP3D1_ENST00000355272	0.988385	1.03927	0.329332	0.951036	0.316887	0.333202	0.983751	1.13242	0.321594	AP3D1_ENST00000355272				0.951036	0.316887	0.333202	0.983751	1.13242	0.321594	AP3D1_ENST00000355272
AP4B1	0.877059	1.09533	0.381641	0.800727	0.348426	0.435137	0.840836	1.38396	0.368577	AP4B1	0.877059	1.09533	0.381641	0.800727	0.348426	0.435137	0.840836	1.38396	0.368577	AP4B1
AP4E1	0.743191	1.09426	0.847914	0.679172	0.774874	1.14091	0.690059	1.4341	0.840629	AP4E1	0.743191	1.09426	0.847914	0.679172	0.774874	1.14091	0.690059	1.4341	0.840629	AP4E1
AP4M1	0.934644	0.995756	1.5733	0.938628	1.58	1.68331	0.911426	0.986753	1.60876	AP4M1	0.934644	0.995756	1.5733	0.938628	1.58	1.68331	0.911426	0.986753	1.60876	AP4M1
AP5B1	0.901283	1.04176	1.08042	0.865151	1.03711	1.19876	0.863676	1.13457	1.0833	AP5B1	0.901283	1.04176	1.08042	0.865151	1.03711	1.19876	0.863676	1.13457	1.0833	AP5B1
APAF1	0.757318	1.04566	1.40274	0.724251	1.34149	1.85225	0.707394	1.18526	1.43579	APAF1	0.757318	1.04566	1.40274	0.724251	1.34149	1.85225	0.707394	1.18526	1.43579	APAF1
APBA2	1.00801	0.999045	0.96011	1.00898	0.961027	0.952476	1.01107	0.996951	0.958576	APBA2	1.00801	0.999045	0.96011	1.00898	0.961027	0.952476	1.01107	0.996951	0.958576	APBA2
APBB1	0.978099	1.02086	0.798073	0.958114	0.781767	0.815943	0.97009	1.0694	0.791228	APBB1	0.978099	1.02086	0.798073	0.958114	0.781767	0.815943	0.97009	1.0694	0.791228	APBB1
APBB1_ENST00000389906	1.03306	0.993711	0.883784	1.0396	0.889378	0.8555	1.04612	0.980302	0.879426	APBB1_ENST00000389906	1.03306	0.993711	0.883784	1.0396	0.889378	0.8555	1.04612	0.980302	0.879426	APBB1_ENST00000389906
APBB1IP	0.788422	1.06058	1.30184	0.743385	1.22747	1.65119	0.73366	1.23152	1.31977	APBB1IP	0.788422	1.06058	1.30184	0.743385	1.22747	1.65119	0.73366	1.23152	1.31977	APBB1IP
APBB2	0.849932	1.02058	1.60914	0.832797	1.5767	1.89325	0.807413	1.07202	1.65144	APBB2	0.849932	1.02058	1.60914	0.832797	1.5767	1.89325	0.807413	1.07202	1.65144	APBB2
APBB2_ENST00000295974	0.896319	0.997356	1.71184	0.898695	1.71638	1.90985	0.864875	0.991243	1.76475	APBB2_ENST00000295974	0.896319	0.997356	1.71184	0.898695	1.71638	1.90985	0.864875	0.991243	1.76475	APBB2_ENST00000295974
APBB3	0.683807	1.14114	0.692938	0.599234	0.607236	1.01335	0.611347	1.66616	0.684928	APBB3										APBB3
APC2	0.815466	1.05824	1.45871	0.770584	1.37842	1.7888	0.759527	1.21356	1.47787	APC2	0.815466	1.05824	1.45871	0.770584	1.37842	1.7888	0.759527	1.21356	1.47787	APC2
APCDD1	1.2409	0.944405	0.315293	1.31394	0.333854	0.254085	1.36485	0.842313	0.306401	APCDD1										APCDD1
APCDD1L	1.02538	0.995382	0.882775	1.03014	0.886871	0.860923	1.03571	0.985536	0.879135	APCDD1L	1.02538	0.995382	0.882775	1.03014	0.886871	0.860923	1.03571	0.985536	0.879135	APCDD1L
APCS	1.13081	0.931442	1.14234	1.21404	1.22642	1.0102	1.19367	0.822371	1.15165	APCS										APCS
APEH	1.08704	1.00195	0.417703	1.08493	0.416891	0.384257	1.12434	1.00612	0.40692	APEH	1.08704	1.00195	0.417703	1.08493	0.416891	0.384257	1.12434	1.00612	0.40692	APEH
APEX2	0.915186	1.04948	0.718238	0.872037	0.684375	0.7848	0.886574	1.17717	0.710411	APEX2	0.915186	1.04948	0.718238	0.872037	0.684375	0.7848	0.886574	1.17717	0.710411	APEX2
APLNR	1.16811	0.956882	0.523532	1.22074	0.547122	0.448188	1.25091	0.876806	0.513808	APLNR										APLNR
APLP1	0.838318	1.07041	0.905654	0.783175	0.846082	1.08032	0.789543	1.2646	0.9023	APLP1	0.838318	1.07041	0.905654	0.783175	0.846082	1.08032	0.789543	1.2646	0.9023	APLP1
APLP2	1.10426	1.0093	0.278291	1.09408	0.275725	0.252017	1.1445	1.03196	0.269038	APLP2				1.09408	0.275725	0.252017	1.1445	1.03196	0.269038	APLP2
APOA4	1.2275	0.908919	0.940666	1.3505	1.03493	0.766327	1.3475	0.765552	0.937989	APOA4										APOA4
APOA5	0.854201	1.07224	0.756959	0.796652	0.705962	0.886161	0.810771	1.27541	0.748721	APOA5	0.854201	1.07224	0.756959	0.796652	0.705962	0.886161	0.810771	1.27541	0.748721	APOA5
APOB	0.959568	1.03762	0.71178	0.924781	0.685976	0.741771	0.945994	1.13023	0.700546	APOB	0.959568	1.03762	0.71178	0.924781	0.685976	0.741771	0.945994	1.13023	0.700546	APOB
APOBR	0.85067	1.08134	0.617444	0.786678	0.570997	0.725833	0.808922	1.32814	0.605852	APOBR	0.85067	1.08134	0.617444	0.786678	0.570997	0.725833	0.808922	1.32814	0.605852	APOBR
APOH	1.00541	1.0145	0.712244	0.991044	0.702063	0.708408	1.00722	1.052	0.703696	APOH	1.00541	1.0145	0.712244	0.991044	0.702063	0.708408	1.00722	1.052	0.703696	APOH
APOL5	0.782641	1.02149	2.02388	0.766175	1.9813	2.58597	0.725027	1.07279	2.11987	APOL5										APOL5
APP	1.1068	0.943097	1.27945	1.17358	1.35665	1.15599	1.14805	0.831801	1.29719	APP				1.17358	1.35665	1.15599	1.14805	0.831801	1.29719	APP
APPBP2	0.784305	1.05693	1.21509	0.742057	1.14964	1.54926	0.73371	1.21898	1.23128	APPBP2	0.784305	1.05693	1.21509	0.742057	1.14964	1.54926	0.73371	1.21898	1.23128	APPBP2
APPL1	0.744765	1.0315	1.58496	0.722021	1.53655	2.12813	0.69327	1.11988	1.64628	APPL1	0.744765	1.0315	1.58496	0.722021	1.53655	2.12813	0.69327	1.11988	1.64628	APPL1
APPL2	0.886586	1.05793	0.774459	0.838037	0.73205	0.87353	0.854041	1.21984	0.764929	APPL2	0.886586	1.05793	0.774459	0.838037	0.73205	0.87353	0.854041	1.21984	0.764929	APPL2
AQP10	0.734532	1.11694	1.2109	0.657628	1.08412	1.64853	0.655457	1.44584	1.21804	AQP10				0.657628	1.08412	1.64853	0.655457	1.44584	1.21804	AQP10
AQP8	1.09253	0.990621	0.29615	1.10287	0.298953	0.271068	1.13879	0.972624	0.289572	AQP8				1.10287	0.298953	0.271068	1.13879	0.972624	0.289572	AQP8
AQR	0.667493	1.07347	1.55143	0.621808	1.44524	2.32426	0.603849	1.30697	1.59852	AQR										AQR
AR	0.528745	1.18412	1.05658	0.44653	0.89229	1.99827	0.449691	1.94973	1.05957	AR										AR	0.528745	1.18412	1.05658
ARAF	0.540831	1.18411	1.04819	0.456741	0.885215	1.93811	0.459433	1.97315	1.05013	ARAF										ARAF	0.540831	1.18411	1.04819
ARAP1	1.09037	0.960329	1.03679	1.13541	1.07962	0.950866	1.13073	0.885796	1.03827	ARAP1	1.09037	0.960329	1.03679	1.13541	1.07962	0.950866	1.13073	0.885796	1.03827	ARAP1
ARAP2	0.926045	1.00664	1.21381	0.919937	1.20581	1.31075	0.905707	1.02315	1.23018	ARAP2	0.926045	1.00664	1.21381	0.919937	1.20581	1.31075	0.905707	1.02315	1.23018	ARAP2
ARAP3	0.966913	0.996018	1.32462	0.970779	1.32992	1.36995	0.954382	0.987712	1.34149	ARAP3	0.966913	0.996018	1.32462	0.970779	1.32992	1.36995	0.954382	0.987712	1.34149	ARAP3
ARC	0.98266	0.994791	1.17186	0.987806	1.17799	1.19253	0.976325	0.98392	1.18212	ARC	0.98266	0.994791	1.17186	0.987806	1.17799	1.19253	0.976325	0.98392	1.18212	ARC
ARFGAP2	0.680487	1.08638	1.60542	0.62638	1.47777	2.35922	0.609897	1.34884	1.64866	ARFGAP2										ARFGAP2
ARFGEF1	0.862788	1.01232	1.39841	0.852289	1.38139	1.6208	0.828839	1.04427	1.433	ARFGEF1	0.862788	1.01232	1.39841	0.852289	1.38139	1.6208	0.828839	1.04427	1.433	ARFGEF1
ARFGEF2	0.895572	1.04145	0.966522	0.859931	0.928058	1.07922	0.864001	1.14854	0.964876	ARFGEF2	0.895572	1.04145	0.966522	0.859931	0.928058	1.07922	0.864001	1.14854	0.964876	ARFGEF2
ARHGAP10	0.820172	1.03239	1.49482	0.794443	1.44793	1.82257	0.771757	1.1137	1.53363	ARHGAP10	0.820172	1.03239	1.49482	0.794443	1.44793	1.82257	0.771757	1.1137	1.53363	ARHGAP10
ARHGAP11A	0.509075	1.14482	1.1442	0.444676	0.999456	2.24761	0.444692	1.83273	1.15307	ARHGAP11A										ARHGAP11A
ARHGAP12	0.733895	1.04149	1.50262	0.70466	1.44276	2.04746	0.680245	1.15851	1.55474	ARHGAP12	0.733895	1.04149	1.50262	0.70466	1.44276	2.04746	0.680245	1.15851	1.55474	ARHGAP12
ARHGAP15	0.927388	1.03255	0.908993	0.898151	0.880335	0.980164	0.905977	1.11742	0.904253	ARHGAP15	0.927388	1.03255	0.908993	0.898151	0.880335	0.980164	0.905977	1.11742	0.904253	ARHGAP15
ARHGAP17	0.930502	1.03256	0.89493	0.901156	0.866706	0.961771	0.907988	1.11551	0.890867	ARHGAP17	0.930502	1.03256	0.89493	0.901156	0.866706	0.961771	0.907988	1.11551	0.890867	ARHGAP17
ARHGAP18	0.659161	1.08639	1.42206	0.606744	1.30897	2.15737	0.592803	1.35341	1.4595	ARHGAP18										ARHGAP18
ARHGAP20	0.924316	1.02911	0.958805	0.898169	0.931682	1.03731	0.902097	1.10661	0.956814	ARHGAP20	0.924316	1.02911	0.958805	0.898169	0.931682	1.03731	0.902097	1.10661	0.956814	ARHGAP20
ARHGAP20_ENST00000533353	1.00913	1.01134	0.789547	0.997813	0.780691	0.782402	1.01211	1.03986	0.781129	ARHGAP20_ENST00000533353	1.00913	1.01134	0.789547	0.997813	0.780691	0.782402	1.01211	1.03986	0.781129	ARHGAP20_ENST00000533353
ARHGAP21	0.933996	1.00117	1.28578	0.932907	1.28428	1.37664	0.915105	1.00403	1.30631	ARHGAP21	0.933996	1.00117	1.28578	0.932907	1.28428	1.37664	0.915105	1.00403	1.30631	ARHGAP21
ARHGAP21_ENST00000320481	0.95253	0.972939	1.59608	0.979023	1.64047	1.67562	0.938788	0.911602	1.64906	ARHGAP21_ENST00000320481	0.95253	0.972939	1.59608	0.979023	1.64047	1.67562	0.938788	0.911602	1.64906	ARHGAP21_ENST00000320481
ARHGAP21_ENST00000376410	0.885421	1.0052	1.41537	0.880842	1.40805	1.59853	0.855155	1.01802	1.45129	ARHGAP21_ENST00000376410	0.885421	1.0052	1.41537	0.880842	1.40805	1.59853	0.855155	1.01802	1.45129	ARHGAP21_ENST00000376410
ARHGAP22	0.742313	1.11403	0.796853	0.666329	0.715286	1.07347	0.675899	1.48815	0.790853	ARHGAP22				0.666329	0.715286	1.07347	0.675899	1.48815	0.790853	ARHGAP22
ARHGAP22_ENST00000417247	0.827903	1.0818	0.731362	0.765302	0.676061	0.883391	0.777286	1.32392	0.724402	ARHGAP22_ENST00000417247	0.827903	1.0818	0.731362	0.765302	0.676061	0.883391	0.777286	1.32392	0.724402	ARHGAP22_ENST00000417247
ARHGAP24	0.803425	1.06629	1.04844	0.75348	0.983263	1.30496	0.754282	1.26514	1.05099	ARHGAP24	0.803425	1.06629	1.04844	0.75348	0.983263	1.30496	0.754282	1.26514	1.05099	ARHGAP24
ARHGAP25	1.04058	1.0007	0.765743	1.03985	0.765207	0.735883	1.0556	1.00229	0.756985	ARHGAP25	1.04058	1.0007	0.765743	1.03985	0.765207	0.735883	1.0556	1.00229	0.756985	ARHGAP25
ARHGAP25_ENST00000497079	1.08724	0.980641	0.776879	1.1087	0.792215	0.714543	1.12255	0.939885	0.76905	ARHGAP25_ENST00000497079	1.08724	0.980641	0.776879	1.1087	0.792215	0.714543	1.12255	0.939885	0.76905	ARHGAP25_ENST00000497079
ARHGAP26	0.99659	0.969226	1.50009	1.02823	1.54772	1.50522	0.995382	0.906236	1.53581	ARHGAP26	0.99659	0.969226	1.50009	1.02823	1.54772	1.50522	0.995382	0.906236	1.53581	ARHGAP26
ARHGAP27	0.656351	1.0826	2.03722	0.606273	1.88179	3.10387	0.579535	1.31816	2.12366	ARHGAP27										ARHGAP27
ARHGAP28	0.815038	1.05814	1.07573	0.770254	1.01662	1.31986	0.769415	1.23133	1.08001	ARHGAP28	0.815038	1.05814	1.07573	0.770254	1.01662	1.31986	0.769415	1.23133	1.08001	ARHGAP28
ARHGAP29	0.770623	1.10803	0.685779	0.69549	0.618918	0.889902	0.722572	1.47908	0.668442	ARHGAP29				0.69549	0.618918	0.889902	0.722572	1.47908	0.668442	ARHGAP29
ARHGAP30	0.765373	1.11084	0.773567	0.689007	0.696384	1.01071	0.705634	1.44862	0.763117	ARHGAP30				0.689007	0.696384	1.01071	0.705634	1.44862	0.763117	ARHGAP30
ARHGAP31	0.968727	0.984769	1.42064	0.98371	1.44261	1.4665	0.957932	0.95242	1.44916	ARHGAP31	0.968727	0.984769	1.42064	0.98371	1.44261	1.4665	0.957932	0.95242	1.44916	ARHGAP31
ARHGAP32	1.11092	0.975925	0.751521	1.13833	0.770061	0.676485	1.15378	0.922705	0.743098	ARHGAP32	1.11092	0.975925	0.751521	1.13833	0.770061	0.676485	1.15378	0.922705	0.743098	ARHGAP32
ARHGAP33	0.886532	1.06257	0.735016	0.834327	0.691733	0.829092	0.847211	1.22103	0.728017	ARHGAP33	0.886532	1.06257	0.735016	0.834327	0.691733	0.829092	0.847211	1.22103	0.728017	ARHGAP33
ARHGAP33_ENST00000378944	0.887509	1.07438	0.502009	0.826068	0.467256	0.565639	0.847844	1.26776	0.493349	ARHGAP33_ENST00000378944	0.887509	1.07438	0.502009	0.826068	0.467256	0.565639	0.847844	1.26776	0.493349	ARHGAP33_ENST00000378944
ARHGAP36	0.869002	1.06409	0.801864	0.81666	0.753566	0.922742	0.827031	1.23558	0.79586	ARHGAP36	0.869002	1.06409	0.801864	0.81666	0.753566	0.922742	0.827031	1.23558	0.79586	ARHGAP36
ARHGAP39	1.1225	0.948408	1.04197	1.18357	1.09865	0.92825	1.17707	0.852785	1.04382	ARHGAP39				1.18357	1.09865	0.92825	1.17707	0.852785	1.04382	ARHGAP39
ARHGAP4	1.02215	0.991806	0.984847	1.0306	0.992984	0.963502	1.03098	0.974597	0.984255	ARHGAP4	1.02215	0.991806	0.984847	1.0306	0.992984	0.963502	1.03098	0.974597	0.984255	ARHGAP4
ARHGAP42	0.896957	1.01786	1.2142	0.881217	1.19289	1.35369	0.868473	1.06232	1.23034	ARHGAP42	0.896957	1.01786	1.2142	0.881217	1.19289	1.35369	0.868473	1.06232	1.23034	ARHGAP42
ARHGAP44	1.01171	0.984411	1.17189	1.02773	1.19045	1.15833	1.01614	0.952119	1.18116	ARHGAP44	1.01171	0.984411	1.17189	1.02773	1.19045	1.15833	1.01614	0.952119	1.18116	ARHGAP44
ARHGAP5	1.19326	0.91842	1.30291	1.29926	1.41864	1.09188	1.26211	0.755824	1.32621	ARHGAP5										ARHGAP5
ARHGAP6	0.938419	1.01198	1.18691	0.927307	1.17286	1.2648	0.917499	1.03901	1.19749	ARHGAP6	0.938419	1.01198	1.18691	0.927307	1.17286	1.2648	0.917499	1.03901	1.19749	ARHGAP6
ARHGAP6_ENST00000380718	0.94543	0.984383	1.57613	0.960429	1.60114	1.66711	0.926491	0.952317	1.61941	ARHGAP6_ENST00000380718	0.94543	0.984383	1.57613	0.960429	1.60114	1.66711	0.926491	0.952317	1.61941	ARHGAP6_ENST00000380718
ARHGAP8	1.10271	0.960314	0.907356	1.14828	0.944854	0.822844	1.15195	0.8901	0.903793	ARHGAP8	1.10271	0.960314	0.907356	1.14828	0.944854	0.822844	1.15195	0.8901	0.903793	ARHGAP8
ARHGAP9	0.594121	1.16389	1.0441	0.510463	0.897076	1.75738	0.513466	1.78582	1.04607	ARHGAP9										ARHGAP9
ARHGEF1	0.790729	1.10325	0.6345	0.716727	0.575119	0.802424	0.731436	1.4259	0.626413	ARHGEF1				0.716727	0.575119	0.802424	0.731436	1.4259	0.626413	ARHGEF1
ARHGEF10	1.04696	0.987025	0.919041	1.06072	0.931122	0.877821	1.06503	0.959159	0.915693	ARHGEF10	1.04696	0.987025	0.919041	1.06072	0.931122	0.877821	1.06503	0.959159	0.915693	ARHGEF10
ARHGEF10_ENST00000398560	1.09708	0.985356	0.683892	1.11339	0.694056	0.623373	1.1357	0.953815	0.673267	ARHGEF10_ENST00000398560	1.09708	0.985356	0.683892	1.11339	0.694056	0.623373	1.1357	0.953815	0.673267	ARHGEF10_ENST00000398560
ARHGEF10_ENST00000398564	1.06642	0.979301	0.923295	1.08896	0.942811	0.865789	1.09265	0.93593	0.920099	ARHGEF10_ENST00000398564	1.06642	0.979301	0.923295	1.08896	0.942811	0.865789	1.09265	0.93593	0.920099	ARHGEF10_ENST00000398564
ARHGEF10L	0.911686	1.05018	0.740566	0.868124	0.70518	0.812304	0.880172	1.17456	0.73406	ARHGEF10L	0.911686	1.05018	0.740566	0.868124	0.70518	0.812304	0.880172	1.17456	0.73406	ARHGEF10L
ARHGEF10L_ENST00000375408	0.854601	1.08746	0.508495	0.785868	0.467599	0.595009	0.805863	1.32661	0.500129	ARHGEF10L_ENST00000375408	0.854601	1.08746	0.508495	0.785868	0.467599	0.595009	0.805863	1.32661	0.500129	ARHGEF10L_ENST00000375408
ARHGEF11	0.884724	1.05383	0.898667	0.839533	0.852765	1.01576	0.846954	1.18864	0.894603	ARHGEF11	0.884724	1.05383	0.898667	0.839533	0.852765	1.01576	0.846954	1.18864	0.894603	ARHGEF11
ARHGEF12	0.853438	1.03479	1.20499	0.824749	1.16448	1.41192	0.81523	1.12808	1.21919	ARHGEF12	0.853438	1.03479	1.20499	0.824749	1.16448	1.41192	0.81523	1.12808	1.21919	ARHGEF12
ARHGEF15	1.0143	0.995744	0.963919	1.01863	0.968039	0.950333	1.02019	0.986898	0.962694	ARHGEF15	1.0143	0.995744	0.963919	1.01863	0.968039	0.950333	1.02019	0.986898	0.962694	ARHGEF15
ARHGEF17	0.807417	1.08956	0.783255	0.741052	0.718876	0.970075	0.750712	1.35367	0.777526	ARHGEF17	0.807417	1.08956	0.783255	0.741052	0.718876	0.970075	0.750712	1.35367	0.777526	ARHGEF17
ARHGEF18	1.14833	0.961413	0.609409	1.19442	0.633867	0.530692	1.21837	0.88794	0.599974	ARHGEF18										ARHGEF18
ARHGEF19	0.992458	1.01084	0.877976	0.981815	0.868561	0.884648	0.989463	1.03376	0.873308	ARHGEF19	0.992458	1.01084	0.877976	0.981815	0.868561	0.884648	0.989463	1.03376	0.873308	ARHGEF19
ARHGEF2	0.860308	1.07242	0.805838	0.80221	0.751418	0.936686	0.814273	1.25677	0.798965	ARHGEF2	0.860308	1.07242	0.805838	0.80221	0.751418	0.936686	0.814273	1.25677	0.798965	ARHGEF2
ARHGEF2_ENST00000368315	0.819885	1.09341	0.837563	0.749839	0.766007	1.02156	0.761552	1.32978	0.831037	ARHGEF2_ENST00000368315	0.819885	1.09341	0.837563	0.749839	0.766007	1.02156	0.761552	1.32978	0.831037	ARHGEF2_ENST00000368315
ARHGEF25	0.878152	1.0328	1.26831	0.850264	1.22803	1.44429	0.838987	1.11032	1.28364	ARHGEF25	0.878152	1.0328	1.26831	0.850264	1.22803	1.44429	0.838987	1.11032	1.28364	ARHGEF25
ARHGEF26	0.838911	1.06392	0.944956	0.788512	0.888187	1.12641	0.793806	1.24544	0.942563	ARHGEF26	0.838911	1.06392	0.944956	0.788512	0.888187	1.12641	0.793806	1.24544	0.942563	ARHGEF26
ARHGEF3	1.01351	1.02957	0.531749	0.984397	0.516476	0.524662	1.01822	1.1035	0.518651	ARHGEF3	1.01351	1.02957	0.531749	0.984397	0.516476	0.524662	1.01822	1.1035	0.518651	ARHGEF3
ARHGEF3_ENST00000296315	0.994007	1.03347	0.56284	0.961813	0.544611	0.566234	0.991878	1.11556	0.550439	ARHGEF3_ENST00000296315	0.994007	1.03347	0.56284	0.961813	0.544611	0.566234	0.991878	1.11556	0.550439	ARHGEF3_ENST00000296315
ARHGEF3_ENST00000413728	1.07742	1.00023	0.598841	1.07717	0.598705	0.555812	1.10725	1.00074	0.586402	ARHGEF3_ENST00000413728	1.07742	1.00023	0.598841	1.07717	0.598705	0.555812	1.10725	1.00074	0.586402	ARHGEF3_ENST00000413728
ARHGEF33	1.27851	0.949134	0.384203	1.34703	0.404793	0.300508	1.41777	0.857576	0.369184	ARHGEF33										ARHGEF33
ARHGEF33_ENST00000398800	1.24655	0.971984	0.268942	1.28248	0.276694	0.215749	1.36526	0.918001	0.256551	ARHGEF33_ENST00000398800										ARHGEF33_ENST00000398800
ARHGEF37	0.574387	1.19879	0.759661	0.479138	0.633688	1.32256	0.490107	2.00225	0.751444	ARHGEF37										ARHGEF37	0.574387	1.19879	0.759661
ARHGEF4	1.09552	0.941557	1.33147	1.16352	1.41412	1.21538	1.13636	0.835526	1.35108	ARHGEF4				1.16352	1.41412	1.21538	1.13636	0.835526	1.35108	ARHGEF4
ARHGEF4_ENST00000355771	1.16821	0.94499	0.801634	1.23621	0.8483	0.686208	1.24727	0.84449	0.79465	ARHGEF4_ENST00000355771										ARHGEF4_ENST00000355771
ARHGEF5	0.849334	1.05465	1.04288	0.805326	0.988843	1.22788	0.805899	1.20037	1.04509	ARHGEF5	0.849334	1.05465	1.04288	0.805326	0.988843	1.22788	0.805899	1.20037	1.04509	ARHGEF5
ARHGEF6	0.785586	1.0401	1.41666	0.755295	1.36203	1.80331	0.734993	1.14705	1.45378	ARHGEF6	0.785586	1.0401	1.41666	0.755295	1.36203	1.80331	0.734993	1.14705	1.45378	ARHGEF6
ARHGEF7	0.666486	1.14139	0.794035	0.583923	0.695671	1.19137	0.595169	1.66559	0.786283	ARHGEF7										ARHGEF7
ARHGEF7_ENST00000375736	0.797024	1.10842	0.54969	0.719061	0.49592	0.689678	0.744933	1.46655	0.536637	ARHGEF7_ENST00000375736				0.719061	0.49592	0.689678	0.744933	1.46655	0.536637	ARHGEF7_ENST00000375736
ARHGEF9	0.959661	1.06902	0.287238	0.8977	0.268692	0.299312	0.946082	1.25883	0.27652	ARHGEF9				0.8977	0.268692	0.299312	0.946082	1.25883	0.27652	ARHGEF9
ARHGEF9_ENST00000374878	0.96273	1.05114	0.481734	0.915888	0.458296	0.500384	0.950439	1.18803	0.46899	ARHGEF9_ENST00000374878	0.96273	1.05114	0.481734	0.915888	0.458296	0.500384	0.950439	1.18803	0.46899	ARHGEF9_ENST00000374878
ARID3A	0.702177	1.14495	0.603927	0.613283	0.527471	0.860078	0.628404	1.6571	0.594993	ARID3A										ARID3A
ARID3B	0.997116	1.04588	0.233039	0.953374	0.222816	0.233713	0.996007	1.15984	0.225871	ARID3B				0.953374	0.222816	0.233713	0.996007	1.15984	0.225871	ARID3B
ARID3C	0.787658	1.1005	0.887782	0.715726	0.806707	1.12712	0.722322	1.37967	0.884382	ARID3C	0.787658	1.1005	0.887782	0.715726	0.806707	1.12712	0.722322	1.37967	0.884382	ARID3C
ARID4A	0.729913	1.05155	1.33965	0.694128	1.27397	1.83535	0.679947	1.21818	1.36925	ARID4A	0.729913	1.05155	1.33965	0.694128	1.27397	1.83535	0.679947	1.21818	1.36925	ARID4A
ARID4B_ENST00000264183	1.11791	0.98286	0.865006	1.1374	0.88009	0.773772	1.15351	0.945027	0.853291	ARID4B_ENST00000264183	1.11791	0.98286	0.865006	1.1374	0.88009	0.773772	1.15351	0.945027	0.853291	ARID4B_ENST00000264183
ARID5A	1.24169	0.866765	1.70075	1.43256	1.96218	1.3697	1.3756	0.673999	1.73932	ARID5A										ARID5A	1.24169	0.866765	1.70075
ARID5B	0.718163	1.07863	1.41582	0.665812	1.31262	1.97145	0.653002	1.3103	1.44502	ARID5B	0.718163	1.07863	1.41582	0.665812	1.31262	1.97145	0.653002	1.3103	1.44502	ARID5B
ARID5B_ENST00000309334	0.66394	1.09072	1.53925	0.608718	1.41123	2.31836	0.593774	1.37422	1.57965	ARID5B_ENST00000309334										ARID5B_ENST00000309334
ARIH2	0.71995	1.11316	0.849333	0.646762	0.762993	1.17971	0.659724	1.49181	0.840885	ARIH2				0.646762	0.762993	1.17971	0.659724	1.49181	0.840885	ARIH2
ARMC2	0.894823	1.04915	0.84961	0.852904	0.80981	0.949473	0.863004	1.18138	0.843554	ARMC2	0.894823	1.04915	0.84961	0.852904	0.80981	0.949473	0.863004	1.18138	0.843554	ARMC2
ARMC3	0.67038	1.06823	1.75064	0.627559	1.63881	2.61141	0.604456	1.27808	1.81476	ARMC3										ARMC3
ARMC3_ENST00000409049	0.682862	1.07628	1.56333	0.634465	1.45253	2.28938	0.617993	1.31917	1.6052	ARMC3_ENST00000409049										ARMC3_ENST00000409049
ARMC4	0.868545	1.03802	1.11682	0.836734	1.07592	1.28585	0.832294	1.13819	1.12414	ARMC4	0.868545	1.03802	1.11682	0.836734	1.07592	1.28585	0.832294	1.13819	1.12414	ARMC4
ARMC5	0.891732	1.05767	0.810853	0.843112	0.766643	0.909302	0.851131	1.19518	0.806455	ARMC5	0.891732	1.05767	0.810853	0.843112	0.766643	0.909302	0.851131	1.19518	0.806455	ARMC5
ARMC5_ENST00000457010	0.851379	1.07282	0.883672	0.793589	0.823691	1.03793	0.799214	1.25613	0.88075	ARMC5_ENST00000457010	0.851379	1.07282	0.883672	0.793589	0.823691	1.03793	0.799214	1.25613	0.88075	ARMC5_ENST00000457010
ARMC6	1.21071	0.87631	1.72354	1.3816	1.96681	1.42358	1.32078	0.692284	1.76876	ARMC6										ARMC6
ARMC9	1.01869	1.01086	0.712418	1.00775	0.704764	0.699345	1.02594	1.03497	0.703201	ARMC9	1.01869	1.01086	0.712418	1.00775	0.704764	0.699345	1.02594	1.03497	0.703201	ARMC9
ARMCX1	0.765037	1.13488	0.227528	0.674111	0.200486	0.297408	0.704317	1.62945	0.220569	ARMCX1							0.704317	1.62945	0.220569	ARMCX1
ARMCX2	0.71387	1.13593	0.499544	0.628446	0.439767	0.699768	0.64536	1.64658	0.490865	ARMCX2							0.64536	1.64658	0.490865	ARMCX2
ARMCX5	1.10158	0.967111	0.963084	1.13904	0.995836	0.874274	1.13935	0.896496	0.961275	ARMCX5	1.10158	0.967111	0.963084	1.13904	0.995836	0.874274	1.13935	0.896496	0.961275	ARMCX5
ARNT	0.767106	1.08044	1.04369	0.709997	0.965992	1.36056	0.711489	1.33381	1.0459	ARNT	0.767106	1.08044	1.04369	0.709997	0.965992	1.36056	0.711489	1.33381	1.0459	ARNT
ARNT2	0.932246	1.01687	1.12618	0.916782	1.1075	1.20803	0.910603	1.05723	1.13319	ARNT2	0.932246	1.01687	1.12618	0.916782	1.1075	1.20803	0.910603	1.05723	1.13319	ARNT2
ARNTL	0.885227	0.993428	1.87765	0.891083	1.89007	2.1211	0.852585	0.977559	1.94516	ARNTL							0.852585	0.977559	1.94516	ARNTL
ARNTL2	0.786353	1.05666	1.14444	0.744189	1.08308	1.45538	0.740272	1.24226	1.15308	ARNTL2	0.786353	1.05666	1.14444	0.744189	1.08308	1.45538	0.740272	1.24226	1.15308	ARNTL2
ARPP21	0.637543	1.09966	1.37251	0.579765	1.24812	2.1528	0.568843	1.41696	1.40475	ARPP21										ARPP21
ARRB1	0.923048	1.0373	0.901459	0.88986	0.869047	0.976611	0.894649	1.12615	0.898819	ARRB1	0.923048	1.0373	0.901459	0.88986	0.869047	0.976611	0.894649	1.12615	0.898819	ARRB1
ARSB	0.851321	1.04239	1.28107	0.816703	1.22898	1.5048	0.805432	1.14493	1.29793	ARSB	0.851321	1.04239	1.28107	0.816703	1.22898	1.5048	0.805432	1.14493	1.29793	ARSB
ARSD	1.0136	0.965581	1.51892	1.04973	1.57306	1.49854	1.0188	0.89729	1.55117	ARSD	1.0136	0.965581	1.51892	1.04973	1.57306	1.49854	1.0188	0.89729	1.55117	ARSD
ARSE	1.17014	0.984915	0.183393	1.18806	0.186201	0.156728	1.24575	0.952169	0.177062	ARSE										ARSE
ARSE_ENST00000540563	1.18187	0.972833	0.363514	1.21487	0.373665	0.307575	1.26223	0.915783	0.35308	ARSE_ENST00000540563										ARSE_ENST00000540563
ARSF	1.02052	0.980441	1.17756	1.04088	1.20105	1.15388	1.02825	0.940063	1.18742	ARSF	1.02052	0.980441	1.17756	1.04088	1.20105	1.15388	1.02825	0.940063	1.18742	ARSF
ARSG	0.696266	1.13817	0.717651	0.611743	0.630532	1.03071	0.62502	1.62803	0.708918	ARSG										ARSG
ARSH	1.17023	0.98487	0.155502	1.18821	0.157891	0.132882	1.25034	0.953683	0.149834	ARSH										ARSH
ARSI	0.876048	1.04639	1.10423	0.837207	1.05527	1.26047	0.8344	1.15496	1.10948	ARSI	0.876048	1.04639	1.10423	0.837207	1.05527	1.26047	0.8344	1.15496	1.10948	ARSI
ARSJ	1.08981	1.0138	0.407033	1.07497	0.401491	0.373491	1.12611	1.04444	0.393243	ARSJ	1.08981	1.0138	0.407033	1.07497	0.401491	0.373491	1.12611	1.04444	0.393243	ARSJ
ARVCF	0.99615	1.03673	0.169117	0.960857	0.163126	0.169771	0.99462	1.127	0.165024	ARVCF							0.99462	1.127	0.165024	ARVCF
ASAP1	0.975911	1.01491	0.918433	0.961577	0.904942	0.941103	0.967518	1.04936	0.914712	ASAP1	0.975911	1.01491	0.918433	0.961577	0.904942	0.941103	0.967518	1.04936	0.914712	ASAP1
ASAP2	0.880153	1.05072	0.947892	0.837667	0.902137	1.07696	0.842579	1.18125	0.945656	ASAP2	0.880153	1.05072	0.947892	0.837667	0.902137	1.07696	0.842579	1.18125	0.945656	ASAP2
ASAP3	1.02402	0.982837	1.11818	1.0419	1.13771	1.09196	1.03355	0.948239	1.12406	ASAP3	1.02402	0.982837	1.11818	1.0419	1.13771	1.09196	1.03355	0.948239	1.12406	ASAP3
ASAP3_ENST00000437606	1.05141	0.992963	0.76947	1.05886	0.774923	0.731846	1.07271	0.978337	0.761887	ASAP3_ENST00000437606	1.05141	0.992963	0.76947	1.05886	0.774923	0.731846	1.07271	0.978337	0.761887	ASAP3_ENST00000437606
ASB10	0.99077	1.01411	0.76505	0.976987	0.754407	0.772177	0.987138	1.0462	0.759543	ASB10	0.99077	1.01411	0.76505	0.976987	0.754407	0.772177	0.987138	1.0462	0.759543	ASB10
ASB10_ENST00000377867	1.09451	0.971474	0.768346	1.12665	0.790908	0.702002	1.13768	0.915849	0.762303	ASB10_ENST00000377867	1.09451	0.971474	0.768346	1.12665	0.790908	0.702002	1.13768	0.915849	0.762303	ASB10_ENST00000377867
ASB17	0.958955	1.06123	0.470762	0.903625	0.443601	0.490912	0.946128	1.22961	0.455196	ASB17	0.958955	1.06123	0.470762	0.903625	0.443601	0.490912	0.946128	1.22961	0.455196	ASB17
ASB2	1.11624	0.97106	0.614589	1.14951	0.632905	0.550589	1.17192	0.916501	0.605626	ASB2	1.11624	0.97106	0.614589	1.14951	0.632905	0.550589	1.17192	0.916501	0.605626	ASB2
ASB3	0.955502	1.00605	1.13008	0.949756	1.12329	1.18271	0.941633	1.02037	1.1383	ASB3	0.955502	1.00605	1.13008	0.949756	1.12329	1.18271	0.941633	1.02037	1.1383	ASB3
ASB4	0.971337	1.01693	0.900375	0.955165	0.885385	0.926944	0.961616	1.05794	0.896336	ASB4	0.971337	1.01693	0.900375	0.955165	0.885385	0.926944	0.961616	1.05794	0.896336	ASB4
ASB5	0.695652	1.11734	0.934383	0.622598	0.836259	1.34318	0.630435	1.51147	0.930715	ASB5										ASB5
ASCC2	1.15249	0.937421	1.01899	1.22942	1.08701	0.884163	1.22338	0.825822	1.01982	ASCC2										ASCC2
ASCC3	0.718919	1.05479	1.53983	0.681577	1.45984	2.14186	0.660956	1.21864	1.58653	ASCC3	0.718919	1.05479	1.53983	0.681577	1.45984	2.14186	0.660956	1.21864	1.58653	ASCC3
ASH1L	0.695784	1.10151	1.03849	0.631666	0.942795	1.49255	0.634134	1.45714	1.04067	ASH1L										ASH1L
ASH2L	0.60134	1.1297	1.24809	0.532299	1.1048	2.07552	0.528856	1.61314	1.26328	ASH2L										ASH2L
ASL	0.992016	1.04609	0.240439	0.948309	0.229845	0.242374	0.989047	1.16438	0.233273	ASL				0.948309	0.229845	0.242374	0.989047	1.16438	0.233273	ASL
ASMT	1.24233	0.968383	0	1.28289	0	0	1.37062	0.908663	0	ASMT										ASMT
ASNS	0.834807	1.07219	0.790791	0.7786	0.737547	0.947274	0.79192	1.29553	0.782489	ASNS	0.834807	1.07219	0.790791	0.7786	0.737547	0.947274	0.79192	1.29553	0.782489	ASNS
ASNS_ENST00000394309	0.857375	1.06666	0.756158	0.803797	0.708905	0.881945	0.819078	1.26859	0.746921	ASNS_ENST00000394309	0.857375	1.06666	0.756158	0.803797	0.708905	0.881945	0.819078	1.26859	0.746921	ASNS_ENST00000394309
ASNSD1	0.709916	1.0752	1.22287	0.660264	1.13734	1.72256	0.654131	1.33303	1.23824	ASNSD1				0.660264	1.13734	1.72256	0.654131	1.33303	1.23824	ASNSD1
ASPG	0.802028	1.04579	2.04696	0.766914	1.95734	2.55223	0.740657	1.15784	2.10606	ASPG										ASPG
ASPH	0.985357	1.02111	0.794961	0.964986	0.778526	0.806775	0.9809	1.076	0.785424	ASPH	0.985357	1.02111	0.794961	0.964986	0.778526	0.806775	0.9809	1.076	0.785424	ASPH
ASPHD1	0.969986	0.965968	1.92266	1.00416	1.9904	1.98215	0.958138	0.902503	1.9879	ASPHD1							0.958138	0.902503	1.9879	ASPHD1
ASPM	0.884263	1.01533	1.2207	0.870916	1.20227	1.38047	0.856644	1.05649	1.23953	ASPM	0.884263	1.01533	1.2207	0.870916	1.20227	1.38047	0.856644	1.05649	1.23953	ASPM
ASPRV1	1.1332	0.891765	2.16556	1.27074	2.42839	1.91101	1.19599	0.721294	2.25054	ASPRV1										ASPRV1
ASPSCR1_ENST00000580534	1.04182	1.03252	0	1.00901	0	0	1.06005	1.10713	0	ASPSCR1_ENST00000580534										ASPSCR1_ENST00000580534
ASS1	1.04645	0.980739	0.989665	1.067	1.0091	0.945735	1.06642	0.943791	0.989212	ASS1	1.04645	0.980739	0.989665	1.067	1.0091	0.945735	1.06642	0.943791	0.989212	ASS1
ASTE1	0.80367	1.03294	1.60733	0.778039	1.55607	1.99998	0.751809	1.11617	1.6563	ASTE1	0.80367	1.03294	1.60733	0.778039	1.55607	1.99998	0.751809	1.11617	1.6563	ASTE1
ASTL	0.92839	0.992472	1.78265	0.935432	1.79617	1.92015	0.902407	0.976814	1.83122	ASTL				0.935432	1.79617	1.92015	0.902407	0.976814	1.83122	ASTL
ASTN1	0.994439	1.00427	0.967185	0.990206	0.963068	0.972593	0.992331	1.01355	0.965797	ASTN1	0.994439	1.00427	0.967185	0.990206	0.963068	0.972593	0.992331	1.01355	0.965797	ASTN1
ASTN2	0.920615	1.00695	1.44872	0.914263	1.43872	1.57364	0.893387	1.02233	1.47521	ASTN2	0.920615	1.00695	1.44872	0.914263	1.43872	1.57364	0.893387	1.02233	1.47521	ASTN2
ASTN2_ENST00000288520	1.10459	0.907609	1.79722	1.21703	1.98017	1.62705	1.14941	0.755947	1.8652	ASTN2_ENST00000288520							1.14941	0.755947	1.8652	ASTN2_ENST00000288520
ASTN2_ENST00000313400	0.923763	1.00954	1.38287	0.915031	1.3698	1.497	0.897386	1.03077	1.40433	ASTN2_ENST00000313400	0.923763	1.00954	1.38287	0.915031	1.3698	1.497	0.897386	1.03077	1.40433	ASTN2_ENST00000313400
ASTN2_ENST00000361477	1.15799	0.887919	1.73978	1.30416	1.95939	1.50242	1.2316	0.7165	1.80195	ASTN2_ENST00000361477										ASTN2_ENST00000361477
ASXL3	0.742197	1.0836	1.06452	0.684935	0.982394	1.43429	0.685692	1.36295	1.06796	ASXL3	0.742197	1.0836	1.06452	0.684935	0.982394	1.43429	0.685692	1.36295	1.06796	ASXL3
ASZ1	1.07772	0.928706	1.66059	1.16045	1.78807	1.54085	1.10362	0.786117	1.72065	ASZ1				1.16045	1.78807	1.54085	1.10362	0.786117	1.72065	ASZ1
ATAD2	0.626327	1.05185	1.91475	0.59545	1.82035	3.0571	0.564048	1.21325	2.01673	ATAD2										ATAD2
ATAD3A	0.668603	1.17752	0.36198	0.567804	0.307408	0.541398	0.593136	1.88052	0.351521	ATAD3A										ATAD3A	0.668603	1.17752	0.36198
ATAD3B	0.951828	1.03235	0.797933	0.921999	0.772926	0.838316	0.934311	1.10784	0.790965	ATAD3B	0.951828	1.03235	0.797933	0.921999	0.772926	0.838316	0.934311	1.10784	0.790965	ATAD3B
ATAD5	0.799897	1.00121	1.79555	0.798926	1.79337	2.24473	0.757533	1.00448	1.88067	ATAD5				0.798926	1.79337	2.24473	0.757533	1.00448	1.88067	ATAD5
ATCAY	1.17031	0.96167	0.410692	1.21696	0.427061	0.350924	1.25449	0.889269	0.401484	ATCAY										ATCAY
ATE1	0.890528	1.00303	1.43391	0.887834	1.42957	1.61018	0.85925	1.00993	1.47336	ATE1	0.890528	1.00303	1.43391	0.887834	1.42957	1.61018	0.85925	1.00993	1.47336	ATE1
ATF2	1.12074	0.9407	1.28649	1.19139	1.36759	1.14789	1.16439	0.818894	1.30541	ATF2							1.16439	0.818894	1.30541	ATF2
ATF6	0.911554	0.951407	1.94124	0.958112	2.04038	2.12959	0.8864	0.855255	2.06268	ATF6										ATF6
ATF6B	0.991319	0.917757	2.6574	1.08015	2.89553	2.68067	0.987922	0.780685	2.82885	ATF6B										ATF6B	0.991319	0.917757	2.6574	1.08015	2.89553	2.68067
ATF7	0.810971	1.04109	1.63117	0.77896	1.56678	2.01138	0.758589	1.15021	1.66904	ATF7	0.810971	1.04109	1.63117	0.77896	1.56678	2.01138	0.758589	1.15021	1.66904	ATF7
ATF7IP	0.850828	0.954115	2.53178	0.891745	2.65354	2.97567	0.813995	0.852094	2.72539	ATF7IP										ATF7IP	0.850828	0.954115	2.53178
ATF7IP_ENST00000543189	0.947776	0.932396	2.43782	1.0165	2.61457	2.57214	0.933304	0.789234	2.6043	ATF7IP_ENST00000543189										ATF7IP_ENST00000543189	0.947776	0.932396	2.43782
ATG14	0.612828	1.018	2.69247	0.601995	2.64487	4.39351	0.542433	1.06239	2.95574	ATG14										ATG14	0.612828	1.018	2.69247
ATG16L1	0.75644	1.04347	1.69946	0.724926	1.62866	2.24666	0.697196	1.15787	1.76005	ATG16L1	0.75644	1.04347	1.69946	0.724926	1.62866	2.24666	0.697196	1.15787	1.76005	ATG16L1
ATG2A	0.97679	1.01846	0.826553	0.95909	0.811575	0.846193	0.967793	1.06002	0.821525	ATG2A	0.97679	1.01846	0.826553	0.95909	0.811575	0.846193	0.967793	1.06002	0.821525	ATG2A
ATG2B	0.846203	1.04849	1.03718	0.807068	0.989213	1.22569	0.80762	1.19342	1.03914	ATG2B	0.846203	1.04849	1.03718	0.807068	0.989213	1.22569	0.80762	1.19342	1.03914	ATG2B
ATG4D	1.06557	0.980989	0.876962	1.08622	0.893957	0.822998	1.09243	0.941465	0.872607	ATG4D	1.06557	0.980989	0.876962	1.08622	0.893957	0.822998	1.09243	0.941465	0.872607	ATG4D
ATG7	0.960501	0.99794	1.28521	0.962484	1.28786	1.33806	0.946979	0.993327	1.30139	ATG7	0.960501	0.99794	1.28521	0.962484	1.28786	1.33806	0.946979	0.993327	1.30139	ATG7
ATG9A	1.12051	0.961619	0.807226	1.16524	0.839445	0.720408	1.17629	0.890427	0.800462	ATG9A	1.12051	0.961619	0.807226	1.16524	0.839445	0.720408	1.17629	0.890427	0.800462	ATG9A
ATL1	0.735114	1.10928	0.885547	0.662696	0.798309	1.20464	0.672947	1.45595	0.879575	ATL1				0.662696	0.798309	1.20464	0.672947	1.45595	0.879575	ATL1
ATMIN	0.694296	1.12217	0.784909	0.618708	0.699457	1.13051	0.629449	1.58642	0.777492	ATMIN										ATMIN
ATN1	0.899505	1.06024	0.651918	0.848398	0.614879	0.724752	0.864182	1.21357	0.644096	ATN1	0.899505	1.06024	0.651918	0.848398	0.614879	0.724752	0.864182	1.21357	0.644096	ATN1
ATP10A	1.09438	0.950934	1.1658	1.15084	1.22595	1.06527	1.1367	0.862039	1.1738	ATP10A	1.09438	0.950934	1.1658	1.15084	1.22595	1.06527	1.1367	0.862039	1.1738	ATP10A
ATP10B	0.902952	1.02656	1.18362	0.879593	1.153	1.31084	0.871518	1.08944	1.19375	ATP10B	0.902952	1.02656	1.18362	0.879593	1.153	1.31084	0.871518	1.08944	1.19375	ATP10B
ATP10D	0.916519	1.05286	0.679436	0.870509	0.645327	0.741322	0.891086	1.19834	0.668507	ATP10D	0.916519	1.05286	0.679436	0.870509	0.645327	0.741322	0.891086	1.19834	0.668507	ATP10D
ATP11A	1.12964	0.945029	1.01518	1.19535	1.07423	0.89868	1.18976	0.848581	1.01592	ATP11A							1.18976	0.848581	1.01592	ATP11A
ATP11A_ENST00000375630	1.1212	0.944514	1.077	1.18706	1.14027	0.960578	1.17668	0.847064	1.08095	ATP11A_ENST00000375630				1.18706	1.14027	0.960578	1.17668	0.847064	1.08095	ATP11A_ENST00000375630
ATP11B	0.659939	1.0458	1.837	0.631035	1.75654	2.78358	0.598984	1.18176	1.92999	ATP11B										ATP11B
ATP11C	1.17774	0.930941	1.10987	1.26511	1.1922	0.942374	1.24828	0.798764	1.11676	ATP11C										ATP11C
ATP11C_ENST00000361648	1.17654	0.953191	0.817508	1.23432	0.857653	0.694839	1.24677	0.857318	0.809213	ATP11C_ENST00000361648										ATP11C_ENST00000361648
ATP11C_ENST00000370557	1.21055	0.925975	1.02051	1.30733	1.10209	0.843011	1.29801	0.787177	1.02169	ATP11C_ENST00000370557										ATP11C_ENST00000370557
ATP12A	1.02508	1.01491	0.539404	1.01002	0.53148	0.526205	1.03557	1.04732	0.529893	ATP12A	1.02508	1.01491	0.539404	1.01002	0.53148	0.526205	1.03557	1.04732	0.529893	ATP12A
ATP13A1	1.00518	0.952719	1.9388	1.05506	2.03502	1.92882	1.00736	0.868436	2.00139	ATP13A1							1.00736	0.868436	2.00139	ATP13A1
ATP13A1_ENST00000291503	0.995609	0.975917	1.53599	1.02018	1.57389	1.54276	0.993764	0.930363	1.5642	ATP13A1_ENST00000291503	0.995609	0.975917	1.53599	1.02018	1.57389	1.54276	0.993764	0.930363	1.5642	ATP13A1_ENST00000291503
ATP13A2	0.893415	1.04192	1.17018	0.85747	1.1231	1.30978	0.853139	1.13624	1.17607	ATP13A2	0.893415	1.04192	1.17018	0.85747	1.1231	1.30978	0.853139	1.13624	1.17607	ATP13A2
ATP13A2_ENST00000341676	0.878017	1.05795	0.951952	0.829926	0.899811	1.08421	0.83366	1.19557	0.950484	ATP13A2_ENST00000341676	0.878017	1.05795	0.951952	0.829926	0.899811	1.08421	0.83366	1.19557	0.950484	ATP13A2_ENST00000341676
ATP13A3	0.851587	1.05671	0.884058	0.805884	0.836612	1.03813	0.814672	1.23252	0.878631	ATP13A3	0.851587	1.05671	0.884058	0.805884	0.836612	1.03813	0.814672	1.23252	0.878631	ATP13A3
ATP13A4	0.913935	1.04934	0.741635	0.870963	0.706765	0.811475	0.887389	1.18241	0.732337	ATP13A4	0.913935	1.04934	0.741635	0.870963	0.706765	0.811475	0.887389	1.18241	0.732337	ATP13A4
ATP13A4_ENST00000295548	0.797873	1.05286	1.31635	0.757815	1.25026	1.64982	0.745897	1.19794	1.33744	ATP13A4_ENST00000295548	0.797873	1.05286	1.31635	0.757815	1.25026	1.64982	0.745897	1.19794	1.33744	ATP13A4_ENST00000295548
ATP13A5	1.02225	1.00892	0.775985	1.01322	0.769128	0.759096	1.03051	1.02856	0.766294	ATP13A5	1.02225	1.00892	0.775985	1.01322	0.769128	0.759096	1.03051	1.02856	0.766294	ATP13A5
ATP1A1	0.728124	1.10866	1.07432	0.656761	0.969029	1.47547	0.657915	1.43654	1.07772	ATP1A1				0.656761	0.969029	1.47547	0.657915	1.43654	1.07772	ATP1A1
ATP1A2	0.924801	1.04783	0.734285	0.882586	0.700767	0.793992	0.895718	1.15733	0.727437	ATP1A2	0.924801	1.04783	0.734285	0.882586	0.700767	0.793992	0.895718	1.15733	0.727437	ATP1A2
ATP1A3	1.09024	0.975761	0.668827	1.11733	0.685441	0.613466	1.13335	0.929621	0.661672	ATP1A3	1.09024	0.975761	0.668827	1.11733	0.685441	0.613466	1.13335	0.929621	0.661672	ATP1A3
ATP1A4	0.972521	1.03605	0.575064	0.938683	0.555056	0.591313	0.961387	1.11635	0.56574	ATP1A4	0.972521	1.03605	0.575064	0.938683	0.555056	0.591313	0.961387	1.11635	0.56574	ATP1A4
ATP1B4	0.862067	1.0752	0.726242	0.801771	0.675446	0.842443	0.821836	1.28258	0.714739	ATP1B4	0.862067	1.0752	0.726242	0.801771	0.675446	0.842443	0.821836	1.28258	0.714739	ATP1B4
ATP2A1	1.02182	0.966487	1.52789	1.05726	1.58087	1.49526	1.03121	0.903604	1.55386	ATP2A1	1.02182	0.966487	1.52789	1.05726	1.58087	1.49526	1.03121	0.903604	1.55386	ATP2A1
ATP2A1_ENST00000395503	1.02848	0.955947	1.69654	1.07588	1.77472	1.64956	1.0409	0.8761	1.73463	ATP2A1_ENST00000395503	1.02848	0.955947	1.69654	1.07588	1.77472	1.64956	1.0409	0.8761	1.73463	ATP2A1_ENST00000395503
ATP2A2	1.13413	0.930042	1.33628	1.21944	1.4368	1.17824	1.19225	0.802093	1.35441	ATP2A2										ATP2A2
ATP2A3	1.05178	0.978778	0.975711	1.07458	0.996867	0.92768	1.07473	0.93719	0.974942	ATP2A3	1.05178	0.978778	0.975711	1.07458	0.996867	0.92768	1.07473	0.93719	0.974942	ATP2A3
ATP2A3_ENST00000352011	1.01699	0.989751	1.06401	1.02753	1.07502	1.04623	1.02416	0.968912	1.06619	ATP2A3_ENST00000352011	1.01699	0.989751	1.06401	1.02753	1.07502	1.04623	1.02416	0.968912	1.06619	ATP2A3_ENST00000352011
ATP2B1	0.8265	1.06141	0.928601	0.778684	0.874878	1.12353	0.784958	1.25732	0.925201	ATP2B1	0.8265	1.06141	0.928601	0.778684	0.874878	1.12353	0.784958	1.25732	0.925201	ATP2B1
ATP2B1_ENST00000359142	0.820831	1.0627	0.940426	0.772403	0.884943	1.1457	0.778127	1.26289	0.937552	ATP2B1_ENST00000359142	0.820831	1.0627	0.940426	0.772403	0.884943	1.1457	0.778127	1.26289	0.937552	ATP2B1_ENST00000359142
ATP2B2	1.11815	0.977073	0.428093	1.14439	0.438137	0.382856	1.17478	0.93217	0.419972	ATP2B2	1.11815	0.977073	0.428093	1.14439	0.438137	0.382856	1.17478	0.93217	0.419972	ATP2B2
ATP2B3	1.23664	0.918104	0.580929	1.34695	0.632749	0.469763	1.36976	0.783725	0.572958	ATP2B3										ATP2B3
ATP2B3_ENST00000349466	1.14504	0.960286	0.522418	1.1924	0.544024	0.456244	1.21756	0.886569	0.514265	ATP2B3_ENST00000349466										ATP2B3_ENST00000349466
ATP2B3_ENST00000370186	1.24093	0.915652	0.591752	1.35524	0.646263	0.476862	1.37715	0.778063	0.583901	ATP2B3_ENST00000370186										ATP2B3_ENST00000370186
ATP2B4	0.797443	1.11154	0.636277	0.717421	0.572427	0.797896	0.734549	1.42684	0.627184	ATP2B4				0.717421	0.572427	0.797896	0.734549	1.42684	0.627184	ATP2B4
ATP2B4_ENST00000367218	0.777141	1.11022	0.809999	0.699991	0.729587	1.04228	0.710066	1.42197	0.804153	ATP2B4_ENST00000367218				0.699991	0.729587	1.04228	0.710066	1.42197	0.804153	ATP2B4_ENST00000367218
ATP2C1	0.853957	1.04392	1.07763	0.818031	1.03229	1.26192	0.816431	1.17281	1.08169	ATP2C1	0.853957	1.04392	1.07763	0.818031	1.03229	1.26192	0.816431	1.17281	1.08169	ATP2C1
ATP2C2	0.980573	1.01438	0.875853	0.966672	0.863436	0.893205	0.97311	1.04669	0.871958	ATP2C2	0.980573	1.01438	0.875853	0.966672	0.863436	0.893205	0.97311	1.04669	0.871958	ATP2C2
ATP4A	0.870822	1.07016	0.730843	0.813734	0.682931	0.839256	0.826327	1.24967	0.724	ATP4A	0.870822	1.07016	0.730843	0.813734	0.682931	0.839256	0.826327	1.24967	0.724	ATP4A
ATP6AP1	0.704775	1.14954	0.475839	0.613095	0.41394	0.675164	0.631762	1.69385	0.466643	ATP6AP1										ATP6AP1
ATP6V0A1	1.02118	1.01427	0.625262	1.00681	0.616464	0.612295	1.02938	1.04676	0.615269	ATP6V0A1	1.02118	1.01427	0.625262	1.00681	0.616464	0.612295	1.02938	1.04676	0.615269	ATP6V0A1
ATP6V0A2	0.96404	0.993152	1.31051	0.970687	1.31954	1.35939	0.95126	0.978809	1.33067	ATP6V0A2	0.96404	0.993152	1.31051	0.970687	1.31954	1.35939	0.95126	0.978809	1.33067	ATP6V0A2
ATP6V0A4	0.90768	1.01627	1.30645	0.893148	1.28553	1.43933	0.876906	1.05225	1.3265	ATP6V0A4	0.90768	1.01627	1.30645	0.893148	1.28553	1.43933	0.876906	1.05225	1.3265	ATP6V0A4
ATP6V0D2	0.660903	1.0966	1.5054	0.602684	1.37278	2.27779	0.588755	1.3933	1.54354	ATP6V0D2										ATP6V0D2
ATP6V1A	0.640055	1.12494	1.00978	0.568968	0.897627	1.57764	0.572033	1.62886	1.01018	ATP6V1A										ATP6V1A
ATP6V1B2	0.619349	1.11317	1.58059	0.556382	1.41989	2.55201	0.543219	1.48503	1.62206	ATP6V1B2										ATP6V1B2
ATP6V1H	0.722547	1.12695	0.61065	0.641155	0.541863	0.845135	0.665795	1.61165	0.595382	ATP6V1H							0.665795	1.61165	0.595382	ATP6V1H
ATP7A	0.920137	1.02208	1.08385	0.900256	1.06043	1.17792	0.89712	1.08143	1.08803	ATP7A	0.920137	1.02208	1.08385	0.900256	1.06043	1.17792	0.89712	1.08143	1.08803	ATP7A
ATP7B	0.912555	1.01705	1.36453	0.897255	1.34165	1.49528	0.883407	1.05772	1.38189	ATP7B	0.912555	1.01705	1.36453	0.897255	1.34165	1.49528	0.883407	1.05772	1.38189	ATP7B
ATP8A1	0.920342	1.02315	1.07183	0.899522	1.04758	1.1646	0.896415	1.07996	1.07629	ATP8A1	0.920342	1.02315	1.07183	0.899522	1.04758	1.1646	0.896415	1.07996	1.07629	ATP8A1
ATP8A1_ENST00000264449	0.907103	1.02766	1.07371	0.882692	1.04481	1.18367	0.879801	1.09665	1.07833	ATP8A1_ENST00000264449	0.907103	1.02766	1.07371	0.882692	1.04481	1.18367	0.879801	1.09665	1.07833	ATP8A1_ENST00000264449
ATP8A2	0.931698	1.02233	1.07821	0.911351	1.05467	1.15726	0.908408	1.07424	1.08202	ATP8A2	0.931698	1.02233	1.07821	0.911351	1.05467	1.15726	0.908408	1.07424	1.08202	ATP8A2
ATP8B1	0.772612	1.05469	1.44157	0.732546	1.36682	1.86584	0.714863	1.19942	1.4757	ATP8B1	0.772612	1.05469	1.44157	0.732546	1.36682	1.86584	0.714863	1.19942	1.4757	ATP8B1
ATP8B2	0.808478	1.08517	0.961443	0.745027	0.885987	1.1892	0.749367	1.31492	0.960062	ATP8B2	0.808478	1.08517	0.961443	0.745027	0.885987	1.1892	0.749367	1.31492	0.960062	ATP8B2
ATP8B2_ENST00000368487	0.871292	0.995844	1.98642	0.874928	1.99471	2.27985	0.828389	0.987406	2.07219	ATP8B2_ENST00000368487										ATP8B2_ENST00000368487
ATP8B3	0.951268	1.01367	1.1363	0.938436	1.12098	1.19451	0.932559	1.04282	1.14227	ATP8B3	0.951268	1.01367	1.1363	0.938436	1.12098	1.19451	0.932559	1.04282	1.14227	ATP8B3
ATP8B3_ENST00000525591	0.949249	1.01196	1.17955	0.938031	1.16561	1.24261	0.929858	1.03728	1.18789	ATP8B3_ENST00000525591	0.949249	1.01196	1.17955	0.938031	1.16561	1.24261	0.929858	1.03728	1.18789	ATP8B3_ENST00000525591
ATP8B4	0.945224	1.00692	1.17625	0.938724	1.16816	1.24441	0.928265	1.02343	1.18732	ATP8B4	0.945224	1.00692	1.17625	0.938724	1.16816	1.24441	0.928265	1.02343	1.18732	ATP8B4
ATP9A	1.07089	0.943526	1.41462	1.13498	1.49929	1.32098	1.10174	0.845073	1.44169	ATP9A				1.13498	1.49929	1.32098	1.10174	0.845073	1.44169	ATP9A
ATP9B	0.832052	1.09651	0.525392	0.758815	0.479148	0.631442	0.784066	1.39228	0.513816	ATP9B	0.832052	1.09651	0.525392	0.758815	0.479148	0.631442	0.784066	1.39228	0.513816	ATP9B
ATR	0.492176	1.12671	1.53703	0.436826	1.36417	3.12292	0.426225	1.64845	1.58402	ATR										ATR	0.492176	1.12671	1.53703
ATRIP	1.16621	0.941742	0.918658	1.23836	0.975488	0.787727	1.24009	0.831699	0.915404	ATRIP										ATRIP
ATRN	0.686424	1.0651	1.72383	0.644471	1.61847	2.51131	0.620327	1.25522	1.7876	ATRN				0.644471	1.61847	2.51131				ATRN
ATRNL1	0.91297	0.997284	1.39156	0.915457	1.39535	1.52421	0.890151	0.99047	1.42436	ATRNL1	0.91297	0.997284	1.39156	0.915457	1.39535	1.52421	0.890151	0.99047	1.42436	ATRNL1
ATXN1	0.95308	1.03505	0.737292	0.920805	0.712325	0.773589	0.936018	1.11815	0.729167	ATXN1	0.95308	1.03505	0.737292	0.920805	0.712325	0.773589	0.936018	1.11815	0.729167	ATXN1
ATXN2	1.20431	0.923405	1.05551	1.30421	1.14306	0.876438	1.2931	0.781386	1.05827	ATXN2										ATXN2
ATXN2L	0.966771	0.999558	1.2425	0.967199	1.24305	1.28521	0.95447	0.998614	1.25503	ATXN2L	0.966771	0.999558	1.2425	0.967199	1.24305	1.28521	0.95447	0.998614	1.25503	ATXN2L
ATXN2L_ENST00000325215	1.00976	0.984236	1.19592	1.02594	1.21508	1.18436	1.01363	0.952515	1.20593	ATXN2L_ENST00000325215	1.00976	0.984236	1.19592	1.02594	1.21508	1.18436	1.01363	0.952515	1.20593	ATXN2L_ENST00000325215
ATXN2L_ENST00000340394	0.978253	0.995215	1.22689	0.982957	1.23279	1.25416	0.970082	0.985209	1.23893	ATXN2L_ENST00000340394	0.978253	0.995215	1.22689	0.982957	1.23279	1.25416	0.970082	0.985209	1.23893	ATXN2L_ENST00000340394
ATXN7	1.17458	0.95533	0.625171	1.2295	0.654403	0.532252	1.25151	0.864396	0.616139	ATXN7										ATXN7
ATXN7L2	1.05645	0.96344	1.33752	1.09654	1.38828	1.26605	1.08016	0.890319	1.35072	ATXN7L2	1.05645	0.96344	1.33752	1.09654	1.38828	1.26605	1.08016	0.890319	1.35072	ATXN7L2
AURKB	0.894297	1.08805	0.226562	0.821925	0.208227	0.253341	0.857848	1.33233	0.219894	AURKB							0.857848	1.33233	0.219894	AURKB
AURKC	0.972003	1.04633	0.445854	0.928962	0.426111	0.458696	0.961459	1.15843	0.435197	AURKC	0.972003	1.04633	0.445854	0.928962	0.426111	0.458696	0.961459	1.15843	0.435197	AURKC
AUTS2	0.993974	0.998008	1.09587	0.995958	1.09806	1.10252	0.99171	0.993528	1.09932	AUTS2	0.993974	0.998008	1.09587	0.995958	1.09806	1.10252	0.99171	0.993528	1.09932	AUTS2
AVIL	1.11764	0.986001	0.518452	1.13351	0.525812	0.463882	1.16969	0.957745	0.506337	AVIL	1.11764	0.986001	0.518452	1.13351	0.525812	0.463882	1.16969	0.957745	0.506337	AVIL
AVPR1A	1.14575	0.941821	0.980936	1.21652	1.04153	0.856153	1.2136	0.837863	0.980117	AVPR1A										AVPR1A
AVPR1B	1.07126	0.964814	1.04173	1.11033	1.07973	0.97244	1.10647	0.902856	1.04309	AVPR1B	1.07126	0.964814	1.04173	1.11033	1.07973	0.97244	1.10647	0.902856	1.04309	AVPR1B
AXDND1	0.799162	1.09938	0.750628	0.726923	0.682776	0.939268	0.756125	1.40123	0.731509	AXDND1	0.799162	1.09938	0.750628	0.726923	0.682776	0.939268	0.756125	1.40123	0.731509	AXDND1
AXIN2	0.516799	1.17053	1.29733	0.44151	1.10833	2.51032	0.43906	1.90947	1.31262	AXIN2										AXIN2
AXL	0.538122	1.21509	0.57157	0.442867	0.470394	1.06216	0.456682	2.24007	0.561235	AXL										AXL	0.538122	1.21509	0.57157
AZGP1	0.896625	1.11326	0.155451	0.805407	0.139637	0.173374	0.863789	1.45303	0.147843	AZGP1							0.863789	1.45303	0.147843	AZGP1
B3GAT1	1.06592	1.00495	0.329818	1.06067	0.328194	0.309422	1.09569	1.01536	0.322288	B3GAT1				1.06067	0.328194	0.309422	1.09569	1.01536	0.322288	B3GAT1
B3GAT2	0.85174	1.0804	0.673933	0.788357	0.623782	0.791243	0.804567	1.30085	0.665277	B3GAT2	0.85174	1.0804	0.673933	0.788357	0.623782	0.791243	0.804567	1.30085	0.665277	B3GAT2
B3GNT3	0.954827	1.03186	0.752822	0.925346	0.729578	0.788438	0.937173	1.10419	0.746538	B3GNT3	0.954827	1.03186	0.752822	0.925346	0.729578	0.788438	0.937173	1.10419	0.746538	B3GNT3
B3GNT7	0.921358	1.03909	0.914626	0.886701	0.880222	0.992694	0.892586	1.12875	0.911464	B3GNT7	0.921358	1.03909	0.914626	0.886701	0.880222	0.992694	0.892586	1.12875	0.911464	B3GNT7
B3GNT9	1.05819	1.00433	0.333563	1.05362	0.332124	0.315221	1.08433	1.01354	0.326832	B3GNT9				1.05362	0.332124	0.315221	1.08433	1.01354	0.326832	B3GNT9
B3GNTL1	0.738686	1.06497	1.62373	0.693624	1.52468	2.19813	0.67264	1.23891	1.6708	B3GNTL1	0.738686	1.06497	1.62373	0.693624	1.52468	2.19813	0.67264	1.23891	1.6708	B3GNTL1
B4GALNT1	0.942879	1.0172	1.14491	0.926939	1.12556	1.21427	0.921194	1.05452	1.15099	B4GALNT1	0.942879	1.0172	1.14491	0.926939	1.12556	1.21427	0.921194	1.05452	1.15099	B4GALNT1
B4GALNT2	0.865769	1.00125	1.94973	0.864687	1.94729	2.25202	0.822623	1.00392	2.02748	B4GALNT2							0.822623	1.00392	2.02748	B4GALNT2
B4GALNT3	1.03002	0.978093	1.14145	1.05309	1.16701	1.10819	1.04195	0.935071	1.14934	B4GALNT3	1.03002	0.978093	1.14145	1.05309	1.16701	1.10819	1.04195	0.935071	1.14934	B4GALNT3
B4GALNT4	1.10889	0.98389	0.424076	1.12705	0.43102	0.382432	1.1587	0.950953	0.415544	B4GALNT4	1.10889	0.98389	0.424076	1.12705	0.43102	0.382432	1.1587	0.950953	0.415544	B4GALNT4
B4GALT5	0.897796	1.05113	0.827405	0.854124	0.787157	0.921596	0.86539	1.18407	0.820767	B4GALT5	0.897796	1.05113	0.827405	0.854124	0.787157	0.921596	0.86539	1.18407	0.820767	B4GALT5
BAAT	0.760725	1.09715	0.937247	0.693366	0.854258	1.23204	0.699818	1.3943	0.934394	BAAT	0.760725	1.09715	0.937247	0.693366	0.854258	1.23204	0.699818	1.3943	0.934394	BAAT
BACE1	0.754637	1.12053	0.70805	0.673464	0.631888	0.938265	0.687995	1.49658	0.699291	BACE1				0.673464	0.631888	0.938265	0.687995	1.49658	0.699291	BACE1
BACE2	1.01089	0.992783	1.04506	1.01824	1.05266	1.03381	1.01534	0.978174	1.04696	BACE2	1.01089	0.992783	1.04506	1.01824	1.05266	1.03381	1.01534	0.978174	1.04696	BACE2
BACH1	0.748316	1.08549	0.950987	0.689382	0.876091	1.27084	0.695882	1.37563	0.948125	BACH1	0.748316	1.08549	0.950987	0.689382	0.876091	1.27084	0.695882	1.37563	0.948125	BACH1
BACH2	1.0059	1.02135	0.588743	0.984865	0.576433	0.585292	1.008	1.07462	0.578816	BACH2	1.0059	1.02135	0.588743	0.984865	0.576433	0.585292	1.008	1.07462	0.578816	BACH2
BAG3	0.662371	1.06792	2.1861	0.620246	2.04706	3.30041	0.586132	1.24976	2.30014	BAG3										BAG3
BAG6	0.933644	1.00909	1.35025	0.925234	1.33808	1.44621	0.910249	1.0295	1.36767	BAG6	0.933644	1.00909	1.35025	0.925234	1.33808	1.44621	0.910249	1.0295	1.36767	BAG6
BAHCC1	0.93815	1.04139	0.635944	0.900863	0.610668	0.67787	0.915733	1.14521	0.628892	BAHCC1	0.93815	1.04139	0.635944	0.900863	0.610668	0.67787	0.915733	1.14521	0.628892	BAHCC1
BAHD1	0.813638	1.07872	0.98639	0.754261	0.914407	1.21232	0.757417	1.29584	0.985906	BAHD1	0.813638	1.07872	0.98639	0.754261	0.914407	1.21232	0.757417	1.29584	0.985906	BAHD1
BAIAP2	0.947469	1.00101	1.38741	0.946514	1.38601	1.46433	0.928599	1.00321	1.4078	BAIAP2	0.947469	1.00101	1.38741	0.946514	1.38601	1.46433	0.928599	1.00321	1.4078	BAIAP2
BAIAP2_ENST00000435091	0.910951	1.0201	1.30267	0.893	1.277	1.43001	0.880636	1.06665	1.3178	BAIAP2_ENST00000435091	0.910951	1.0201	1.30267	0.893	1.277	1.43001	0.880636	1.06665	1.3178	BAIAP2_ENST00000435091
BAIAP2L1	1.20337	0.899127	1.34268	1.33838	1.49331	1.11576	1.30191	0.735897	1.36283	BAIAP2L1										BAIAP2L1
BAIAP3	0.957499	1.01584	1.04233	0.942571	1.02608	1.0886	0.941386	1.05097	1.04391	BAIAP3	0.957499	1.01584	1.04233	0.942571	1.02608	1.0886	0.941386	1.05097	1.04391	BAIAP3
BAIAP3_ENST00000397488	0.815738	1.07181	1.11296	0.761086	1.03839	1.36436	0.759658	1.26379	1.11753	BAIAP3_ENST00000397488	0.815738	1.07181	1.11296	0.761086	1.03839	1.36436	0.759658	1.26379	1.11753	BAIAP3_ENST00000397488
BANK1	0.899793	1.02844	1.04958	0.874912	1.02056	1.16647	0.873548	1.10577	1.05282	BANK1	0.899793	1.02844	1.04958	0.874912	1.02056	1.16647	0.873548	1.10577	1.05282	BANK1
BANP	0.947508	0.992392	1.4722	0.954772	1.48348	1.55376	0.929109	0.976269	1.50291	BANP	0.947508	0.992392	1.4722	0.954772	1.48348	1.55376	0.929109	0.976269	1.50291	BANP
BARD1	0.461021	1.17063	1.17867	0.393822	1.00686	2.55664	0.393648	2.0113	1.18959	BARD1										BARD1	0.461021	1.17063	1.17867
BARHL1	0.845543	1.08329	0.605081	0.780533	0.558559	0.715612	0.796767	1.32034	0.597021	BARHL1	0.845543	1.08329	0.605081	0.780533	0.558559	0.715612	0.796767	1.32034	0.597021	BARHL1
BASP1	1.18284	0.969999	0.244471	1.21942	0.252032	0.206682	1.26704	0.907497	0.237602	BASP1										BASP1
BAZ1A	0.790378	1.07487	0.893147	0.735324	0.830934	1.13003	0.744976	1.32403	0.887163	BAZ1A	0.790378	1.07487	0.893147	0.735324	0.830934	1.13003	0.744976	1.32403	0.887163	BAZ1A
BAZ1B	0.76843	1.09382	0.848492	0.702519	0.775714	1.10419	0.71313	1.39934	0.841822	BAZ1B	0.76843	1.09382	0.848492	0.702519	0.775714	1.10419	0.71313	1.39934	0.841822	BAZ1B
BAZ2A	0.779743	1.08541	1.00417	0.718384	0.925152	1.28782	0.721733	1.33617	1.00437	BAZ2A	0.779743	1.08541	1.00417	0.718384	0.925152	1.28782	0.721733	1.33617	1.00437	BAZ2A
BAZ2A_ENST00000379441	0.775439	1.08616	1.01944	0.71393	0.938577	1.31466	0.716667	1.33937	1.02039	BAZ2A_ENST00000379441	0.775439	1.08616	1.01944	0.71393	0.938577	1.31466	0.716667	1.33937	1.02039	BAZ2A_ENST00000379441
BAZ2B	0.783297	1.04655	1.25923	0.748453	1.20322	1.60761	0.736901	1.18503	1.28033	BAZ2B	0.783297	1.04655	1.25923	0.748453	1.20322	1.60761	0.736901	1.18503	1.28033	BAZ2B
BBS1	0.824643	1.07627	1.02947	0.766201	0.956509	1.24838	0.76777	1.27347	1.0305	BBS1	0.824643	1.07627	1.02947	0.766201	0.956509	1.24838	0.76777	1.27347	1.0305	BBS1
BBS10	0.906056	1.05056	0.706998	0.862453	0.672974	0.780302	0.881503	1.20785	0.696045	BBS10	0.906056	1.05056	0.706998	0.862453	0.672974	0.780302	0.881503	1.20785	0.696045	BBS10
BBS12	0.955966	1.03473	0.744142	0.923878	0.719163	0.778418	0.943557	1.13236	0.73277	BBS12	0.955966	1.03473	0.744142	0.923878	0.719163	0.778418	0.943557	1.13236	0.73277	BBS12
BBS2	0.908092	1.03936	0.901776	0.873699	0.867622	0.993045	0.879433	1.14553	0.898447	BBS2	0.908092	1.03936	0.901776	0.873699	0.867622	0.993045	0.879433	1.14553	0.898447	BBS2
BBS7	0.81897	1.07331	0.813399	0.76303	0.75784	0.993197	0.775221	1.3121	0.80557	BBS7	0.81897	1.07331	0.813399	0.76303	0.75784	0.993197	0.775221	1.3121	0.80557	BBS7
BBS9	0.778519	1.03625	1.48937	0.751288	1.43727	1.91308	0.727987	1.13486	1.53366	BBS9	0.778519	1.03625	1.48937	0.751288	1.43727	1.91308	0.727987	1.13486	1.53366	BBS9
BBX	1.02447	0.927151	1.92173	1.10497	2.07273	1.87583	1.03218	0.783449	2.02049	BBX							1.03218	0.783449	2.02049	BBX
BCAM	0.934668	1.04725	0.521151	0.892495	0.497637	0.557579	0.911801	1.17175	0.513428	BCAM	0.934668	1.04725	0.521151	0.892495	0.497637	0.557579	0.911801	1.17175	0.513428	BCAM
BCAN	1.08307	0.978914	0.809772	1.1064	0.827214	0.747663	1.12016	0.939719	0.801608	BCAN	1.08307	0.978914	0.809772	1.1064	0.827214	0.747663	1.12016	0.939719	0.801608	BCAN
BCAN_ENST00000361588	1.06078	1.0109	0.48661	1.04934	0.481361	0.458727	1.08735	1.0333	0.474313	BCAN_ENST00000361588	1.06078	1.0109	0.48661	1.04934	0.481361	0.458727	1.08735	1.0333	0.474313	BCAN_ENST00000361588
BCAR1	0.963639	1.04405	0.451201	0.922985	0.432166	0.468227	0.949736	1.15056	0.442302	BCAR1	0.963639	1.04405	0.451201	0.922985	0.432166	0.468227	0.949736	1.15056	0.442302	BCAR1
BCAR1_ENST00000393420	0.956136	1.04686	0.456691	0.913337	0.436248	0.477642	0.939565	1.16141	0.447784	BCAR1_ENST00000393420	0.956136	1.04686	0.456691	0.913337	0.436248	0.477642	0.939565	1.16141	0.447784	BCAR1_ENST00000393420
BCAR1_ENST00000393422	0.944145	1.05776	0.328108	0.892587	0.310191	0.347519	0.923362	1.20448	0.32043	BCAR1_ENST00000393422				0.892587	0.310191	0.347519	0.923362	1.20448	0.32043	BCAR1_ENST00000393422
BCAR1_ENST00000420641	0.731983	1.13616	0.565186	0.644261	0.497453	0.772129	0.660739	1.592	0.556312	BCAR1_ENST00000420641				0.644261	0.497453	0.772129	0.660739	1.592	0.556312	BCAR1_ENST00000420641
BCAR3	1.07084	0.925457	1.76514	1.15709	1.90731	1.64837	1.10015	0.796248	1.82554	BCAR3							1.10015	0.796248	1.82554	BCAR3
BCAR3_ENST00000370247	1.05642	0.919907	1.87294	1.1484	2.03601	1.77292	1.07965	0.786419	1.9523	BCAR3_ENST00000370247							1.07965	0.786419	1.9523	BCAR3_ENST00000370247
BCAS1	0.950844	1.02999	0.831282	0.92316	0.807079	0.874257	0.935008	1.10549	0.82414	BCAS1	0.950844	1.02999	0.831282	0.92316	0.807079	0.874257	0.935008	1.10549	0.82414	BCAS1
BCAS3	0.718541	1.07514	1.41379	0.668323	1.31498	1.96758	0.656888	1.31534	1.43954	BCAS3	0.718541	1.07514	1.41379	0.668323	1.31498	1.96758	0.656888	1.31534	1.43954	BCAS3
BCAS3_ENST00000589222	0.857847	1.02306	1.43705	0.838513	1.40467	1.67519	0.819514	1.08405	1.46592	BCAS3_ENST00000589222	0.857847	1.02306	1.43705	0.838513	1.40467	1.67519	0.819514	1.08405	1.46592	BCAS3_ENST00000589222
BCAT1	0.965728	0.992517	1.27095	0.973009	1.28053	1.31605	0.954673	0.975779	1.2898	BCAT1	0.965728	0.992517	1.27095	0.973009	1.28053	1.31605	0.954673	0.975779	1.2898	BCAT1
BCAT2	0.888307	1.07216	0.597048	0.828522	0.556865	0.672119	0.850258	1.25892	0.586889	BCAT2	0.888307	1.07216	0.597048	0.828522	0.556865	0.672119	0.850258	1.25892	0.586889	BCAT2
BCHE	0.769972	1.05128	1.28833	0.732416	1.22549	1.67321	0.719965	1.2015	1.31201	BCHE	0.769972	1.05128	1.28833	0.732416	1.22549	1.67321	0.719965	1.2015	1.31201	BCHE
BCKDHA	0.908233	1.08733	0.217578	0.835289	0.200104	0.239562	0.876511	1.32823	0.210334	BCKDHA							0.876511	1.32823	0.210334	BCKDHA
BCKDK	0.753902	1.0619	1.98954	0.709952	1.87356	2.639	0.684489	1.22109	2.05271	BCKDK				0.709952	1.87356	2.639				BCKDK
BCL11B	1.02455	0.9928	0.936326	1.03198	0.943116	0.913892	1.03417	0.976552	0.93467	BCL11B	1.02455	0.9928	0.936326	1.03198	0.943116	0.913892	1.03417	0.976552	0.93467	BCL11B
BCL2	1.08803	0.996865	0.254427	1.09145	0.255227	0.233843	1.12697	0.990031	0.248617	BCL2				1.09145	0.255227	0.233843	1.12697	0.990031	0.248617	BCL2
BCL2L12	1.07778	0.963334	1.04508	1.1188	1.08485	0.969656	1.11401	0.896757	1.04683	BCL2L12	1.07778	0.963334	1.04508	1.1188	1.08485	0.969656	1.11401	0.896757	1.04683	BCL2L12
BCL6	0.492635	1.19969	0.947637	0.410634	0.7899	1.92361	0.414725	2.20599	0.94588	BCL6										BCL6	0.492635	1.19969	0.947637
BCL6B	1.03195	1.02487	0.255457	1.00691	0.249258	0.247547	1.0453	1.08192	0.248749	BCL6B				1.00691	0.249258	0.247547	1.0453	1.08192	0.248749	BCL6B
BCL9L	0.933419	1.00102	1.5292	0.932468	1.52765	1.63828	0.910853	1.00336	1.55713	BCL9L	0.933419	1.00102	1.5292	0.932468	1.52765	1.63828	0.910853	1.00336	1.55713	BCL9L
BCO2	0.82721	1.05899	1.07803	0.781131	1.01798	1.30321	0.780279	1.22504	1.08201	BCO2	0.82721	1.05899	1.07803	0.781131	1.01798	1.30321	0.780279	1.22504	1.08201	BCO2
BCORL1	0.970375	0.936768	2.46499	1.03588	2.63138	2.54025	0.959465	0.822436	2.60451	BCORL1										BCORL1	0.970375	0.936768	2.46499
BCR	1.12276	0.957892	0.842294	1.17211	0.879321	0.750203	1.17946	0.878729	0.837207	BCR	1.12276	0.957892	0.842294	1.17211	0.879321	0.750203	1.17946	0.878729	0.837207	BCR
BDKRB1	1.10028	0.914071	1.60499	1.20371	1.75587	1.45871	1.15114	0.787224	1.64865	BDKRB1							1.15114	0.787224	1.64865	BDKRB1
BDKRB2	1.28888	0.84204	1.56324	1.53067	1.85649	1.21286	1.46159	0.637185	1.59998	BDKRB2										BDKRB2	1.28888	0.84204	1.56324	1.53067	1.85649	1.21286
BDP1	1.01997	0.997582	0.952837	1.02244	0.955146	0.934181	1.0257	0.991233	0.95021	BDP1	1.01997	0.997582	0.952837	1.02244	0.955146	0.934181	1.0257	0.991233	0.95021	BDP1
BEGAIN	1.10873	0.986251	0.415952	1.12418	0.421751	0.375162	1.15629	0.956878	0.407363	BEGAIN	1.10873	0.986251	0.415952	1.12418	0.421751	0.375162	1.15629	0.956878	0.407363	BEGAIN
BEND2	1.08524	0.951592	1.28733	1.14045	1.35281	1.18621	1.11495	0.849681	1.30683	BEND2	1.08524	0.951592	1.28733	1.14045	1.35281	1.18621	1.11495	0.849681	1.30683	BEND2
BEND2_ENST00000380030	1.08423	0.964963	1.10238	1.1236	1.1424	1.01674	1.11315	0.887382	1.1084	BEND2_ENST00000380030	1.08423	0.964963	1.10238	1.1236	1.1424	1.01674	1.11315	0.887382	1.1084	BEND2_ENST00000380030
BEND3	1.12312	0.952461	0.924234	1.17918	0.970364	0.822915	1.18106	0.866297	0.921441	BEND3	1.12312	0.952461	0.924234	1.17918	0.970364	0.822915	1.18106	0.866297	0.921441	BEND3
BEND4	1.04658	0.981058	1.02197	1.06678	1.04171	0.976492	1.06376	0.941036	1.02318	BEND4	1.04658	0.981058	1.02197	1.06678	1.04171	0.976492	1.06376	0.941036	1.02318	BEND4
BEST2	1.12593	0.927201	1.3456	1.21433	1.45125	1.1951	1.18621	0.805403	1.36392	BEST2							1.18621	0.805403	1.36392	BEST2
BEST3_ENST00000331471	0.974499	1.0759	0.159652	0.905753	0.148389	0.16383	0.966196	1.29836	0.152215	BEST3_ENST00000331471							0.966196	1.29836	0.152215	BEST3_ENST00000331471
BFSP1	0.859879	1.00149	1.81472	0.858601	1.81202	2.11044	0.818451	1.00482	1.88608	BFSP1				0.858601	1.81202	2.11044	0.818451	1.00482	1.88608	BFSP1
BFSP1_ENST00000377868	0.867328	0.989804	1.92932	0.876262	1.9492	2.22444	0.828441	0.967459	2.01751	BFSP1_ENST00000377868							0.828441	0.967459	2.01751	BFSP1_ENST00000377868
BFSP2	1.04536	0.980762	1.02541	1.06586	1.04552	0.980916	1.0628	0.940878	1.02668	BFSP2	1.04536	0.980762	1.02541	1.06586	1.04552	0.980916	1.0628	0.940878	1.02668	BFSP2
BGN	0.990082	1.04902	0	0.943817	0	0	0.985851	1.16391	0	BGN										BGN
BHLHB9	1.14488	0.950993	1.0139	1.20388	1.06614	0.88559	1.19921	0.845978	1.01456	BHLHB9										BHLHB9
BHMT	0.978432	1.08974	0	0.897859	0	0	0.970854	1.34515	0	BHMT										BHMT
BICC1	0.697977	1.11237	0.925663	0.627469	0.832155	1.32621	0.633797	1.51904	0.922466	BICC1										BICC1
BICC1_ENST00000263103	0.544599	1.16057	1.04527	0.46925	0.900653	1.91934	0.471735	1.8955	1.04723	BICC1_ENST00000263103										BICC1_ENST00000263103
BICD1	0.989592	0.979582	1.356	1.01022	1.38427	1.37026	0.985914	0.937199	1.38036	BICD1	0.989592	0.979582	1.356	1.01022	1.38427	1.37026	0.985914	0.937199	1.38036	BICD1
BICD2	1.04699	1.03086	0.110853	1.01564	0.107535	0.105878	1.06704	1.10171	0.107037	BICD2										BICD2
BICD2_ENST00000375512	0.976241	1.06108	0.11851	0.920043	0.111688	0.121395	0.966951	1.21379	0.114429	BICD2_ENST00000375512										BICD2_ENST00000375512
BIN2	0.939802	0.924523	2.33732	1.01653	2.52814	2.48704	0.92052	0.790892	2.51683	BIN2										BIN2
BIRC2	0.644422	1.13826	0.655367	0.566147	0.575763	1.01698	0.583898	1.76043	0.642362	BIRC2										BIRC2
BIRC6	0.793638	1.02894	1.49074	0.771319	1.44882	1.87837	0.747517	1.10957	1.53424	BIRC6	0.793638	1.02894	1.49074	0.771319	1.44882	1.87837	0.747517	1.10957	1.53424	BIRC6
BIRC8	0.833866	1.07249	0.769524	0.777502	0.717509	0.922838	0.794138	1.30609	0.758951	BIRC8	0.833866	1.07249	0.769524	0.777502	0.717509	0.922838	0.794138	1.30609	0.758951	BIRC8
BIVM	0.687103	1.15422	0.462816	0.595296	0.400977	0.673576	0.625962	1.80195	0.44686	BIVM										BIVM
BLK	0.863187	1.08394	0.60759	0.796345	0.56054	0.703892	0.819256	1.30992	0.596378	BLK	0.863187	1.08394	0.60759	0.796345	0.56054	0.703892	0.819256	1.30992	0.596378	BLK
BLM	0.66038	1.10651	0.979509	0.596812	0.885222	1.48325	0.601227	1.54087	0.978463	BLM										BLM
BLNK	1.06113	1.00992	0.59123	1.05071	0.585422	0.557168	1.08306	1.03351	0.577716	BLNK	1.06113	1.00992	0.59123	1.05071	0.585422	0.557168	1.08306	1.03351	0.577716	BLNK
BLNK_ENST00000427367	1.05356	0.991696	0.865351	1.06238	0.872597	0.821362	1.07258	0.973272	0.858482	BLNK_ENST00000427367	1.05356	0.991696	0.865351	1.06238	0.872597	0.821362	1.07258	0.973272	0.858482	BLNK_ENST00000427367
BMP1	0.983961	1.01906	0.777239	0.965557	0.762702	0.789908	0.977988	1.06322	0.770314	BMP1	0.983961	1.01906	0.777239	0.965557	0.762702	0.789908	0.977988	1.06322	0.770314	BMP1
BMP1_ENST00000306349	1.02201	0.998537	0.865567	1.02351	0.866836	0.846927	1.03085	0.995428	0.860932	BMP1_ENST00000306349	1.02201	0.998537	0.865567	1.02351	0.866836	0.846927	1.03085	0.995428	0.860932	BMP1_ENST00000306349
BMP1_ENST00000397814	1.00188	0.995995	1.06831	1.00591	1.0726	1.0663	1.00263	0.987444	1.07075	BMP1_ENST00000397814	1.00188	0.995995	1.06831	1.00591	1.0726	1.0663	1.00263	0.987444	1.07075	BMP1_ENST00000397814
BMP10	1.00906	0.977966	1.28362	1.0318	1.31254	1.2721	1.0124	0.932601	1.30099	BMP10	1.00906	0.977966	1.28362	1.0318	1.31254	1.2721	1.0124	0.932601	1.30099	BMP10
BMP15	0.741682	1.08012	1.2405	0.686665	1.14848	1.67255	0.67991	1.31496	1.25623	BMP15	0.741682	1.08012	1.2405	0.686665	1.14848	1.67255	0.67991	1.31496	1.25623	BMP15
BMP2	1.20348	0.89049	1.56109	1.35147	1.75307	1.29715	1.29683	0.711081	1.59979	BMP2										BMP2
BMP2K_ENST00000502871	1.00941	1.03011	0.634416	0.979906	0.615872	0.628501	1.01242	1.10668	0.619055	BMP2K_ENST00000502871	1.00941	1.03011	0.634416	0.979906	0.615872	0.628501	1.01242	1.10668	0.619055	BMP2K_ENST00000502871
BMP3	1.04944	1.01129	0.547589	1.03773	0.541478	0.521793	1.06845	1.03724	0.535868	BMP3	1.04944	1.01129	0.547589	1.03773	0.541478	0.521793	1.06845	1.03724	0.535868	BMP3
BMP4	1.05687	0.963546	1.26581	1.09686	1.3137	1.1977	1.07916	0.889565	1.27937	BMP4	1.05687	0.963546	1.26581	1.09686	1.3137	1.1977	1.07916	0.889565	1.27937	BMP4
BMP5	0.740458	1.02229	2.00557	0.724314	1.96184	2.70855	0.681889	1.07915	2.11417	BMP5										BMP5
BMP6	1.20999	0.956776	0.407377	1.26465	0.425781	0.336677	1.31117	0.874188	0.396265	BMP6										BMP6
BMP7	1.18737	0.976264	0	1.21624	0	0	1.28027	0.928389	0	BMP7										BMP7
BMPER	0.722426	1.06933	1.51274	0.675586	1.41466	2.09397	0.658885	1.272	1.55052	BMPER	0.722426	1.06933	1.51274	0.675586	1.41466	2.09397	0.658885	1.272	1.55052	BMPER
BMPR1A	0.58662	1.0957	1.69104	0.535385	1.54335	2.88269	0.514442	1.39342	1.76324	BMPR1A										BMPR1A
BMPR1B	0.644553	1.14096	0.767413	0.56492	0.672601	1.19061	0.577307	1.71566	0.758256	BMPR1B										BMPR1B
BMPR1B_ENST00000515059	0.658627	1.12434	0.93819	0.585792	0.834439	1.42446	0.592249	1.59405	0.935175	BMPR1B_ENST00000515059										BMPR1B_ENST00000515059
BMS1	0.820053	1.09017	0.617324	0.752224	0.566263	0.752785	0.773723	1.38465	0.605621	BMS1	0.820053	1.09017	0.617324	0.752224	0.566263	0.752785	0.773723	1.38465	0.605621	BMS1
BMX	0.760925	1.10487	0.782837	0.688702	0.708535	1.0288	0.705616	1.44367	0.771772	BMX				0.688702	0.708535	1.0288	0.705616	1.44367	0.771772	BMX
BNC1	0.93192	1.02715	0.959664	0.907286	0.934297	1.02977	0.910577	1.09769	0.958015	BNC1	0.93192	1.02715	0.959664	0.907286	0.934297	1.02977	0.910577	1.09769	0.958015	BNC1
BNC2	0.996402	1.00368	0.953765	0.992752	0.950271	0.957209	0.995195	1.01284	0.952077	BNC2	0.996402	1.00368	0.953765	0.992752	0.950271	0.957209	0.995195	1.01284	0.952077	BNC2
BOC	0.873199	1.07286	0.636039	0.813898	0.592844	0.728401	0.832325	1.27116	0.626733	BOC	0.873199	1.07286	0.636039	0.813898	0.592844	0.728401	0.832325	1.27116	0.626733	BOC
BPI	1.26952	0.858869	1.59736	1.47812	1.85985	1.25825	1.42065	0.658421	1.63139	BPI										BPI	1.26952	0.858869	1.59736	1.47812	1.85985	1.25825
BPIFB4	0.695902	1.08948	2.12873	0.63875	1.9539	3.05894	0.615066	1.33139	2.20077	BPIFB4										BPIFB4
BPTF	0.826911	1.05454	1.04799	0.784141	0.993785	1.26735	0.784513	1.21173	1.0511	BPTF	0.826911	1.05454	1.04799	0.784141	0.993785	1.26735	0.784513	1.21173	1.0511	BPTF
BPTF_ENST00000335221	0.861926	1.03258	1.18502	0.83473	1.14763	1.37485	0.826961	1.12541	1.19635	BPTF_ENST00000335221	0.861926	1.03258	1.18502	0.83473	1.14763	1.37485	0.826961	1.12541	1.19635	BPTF_ENST00000335221
BRAP	0.656712	1.04495	2.08073	0.628464	1.99123	3.16841	0.590156	1.16964	2.20425	BRAP										BRAP
BRAT1	0.811576	1.1276	0	0.719739	0	0	0.754934	1.55206	0	BRAT1										BRAT1
BRCA1	0.477092	1.10858	1.74887	0.430364	1.57758	3.66569	0.413822	1.53862	1.82625	BRCA1										BRCA1	0.477092	1.10858	1.74887
BRCA2	0.503408	1.08731	1.70557	0.462984	1.56861	3.38804	0.444114	1.42157	1.78435	BRCA2										BRCA2	0.503408	1.08731	1.70557
BRCA2_ENST00000544455	0.510329	1.09377	1.60072	0.466578	1.46349	3.13664	0.450959	1.46328	1.66324	BRCA2_ENST00000544455										BRCA2_ENST00000544455
BRD1	0.937326	1.04528	0.62362	0.896719	0.596604	0.665319	0.915568	1.16128	0.614729	BRD1	0.937326	1.04528	0.62362	0.896719	0.596604	0.665319	0.915568	1.16128	0.614729	BRD1
BRD3	1.16525	0.945676	0.774195	1.23218	0.818668	0.664405	1.24422	0.846209	0.767247	BRD3										BRD3
BRD3_ENST00000371834	1.16376	0.956413	0.547606	1.21679	0.572563	0.470551	1.24325	0.874174	0.538559	BRD3_ENST00000371834										BRD3_ENST00000371834
BRD4	0.576253	1.18669	0.753789	0.485596	0.635202	1.30809	0.496801	1.97373	0.745167	BRD4										BRD4	0.576253	1.18669	0.753789
BRD4_ENST00000360016	0.670691	1.14583	0.749888	0.58533	0.654448	1.11808	0.596672	1.68311	0.742163	BRD4_ENST00000360016										BRD4_ENST00000360016
BRD8	0.772719	1.04039	1.54681	0.742723	1.48676	2.00177	0.720734	1.15549	1.59025	BRD8	0.772719	1.04039	1.54681	0.742723	1.48676	2.00177	0.720734	1.15549	1.59025	BRD8
BRD8_ENST00000230901	0.752097	1.09587	0.83863	0.686302	0.765265	1.11506	0.695589	1.4327	0.832616	BRD8_ENST00000230901	0.752097	1.09587	0.83863	0.686302	0.765265	1.11506	0.695589	1.4327	0.832616	BRD8_ENST00000230901
BRD9	1.0869	0.98848	0.584134	1.09956	0.590941	0.537432	1.12217	0.962822	0.575158	BRD9	1.0869	0.98848	0.584134	1.09956	0.590941	0.537432	1.12217	0.962822	0.575158	BRD9
BRDT	0.958464	1.05469	0.623017	0.908763	0.59071	0.650016	0.947942	1.21722	0.603324	BRDT	0.958464	1.05469	0.623017	0.908763	0.59071	0.650016	0.947942	1.21722	0.603324	BRDT
BRF1	0.896982	1.01962	1.44406	0.879721	1.41628	1.60991	0.863266	1.06662	1.46643	BRF1	0.896982	1.01962	1.44406	0.879721	1.41628	1.60991	0.863266	1.06662	1.46643	BRF1
BRF1_ENST00000440513	1.04557	0.966225	1.32257	1.08212	1.3688	1.26492	1.06351	0.897105	1.33805	BRF1_ENST00000440513	1.04557	0.966225	1.32257	1.08212	1.3688	1.26492	1.06351	0.897105	1.33805	BRF1_ENST00000440513
BRIP1	0.474041	1.17117	0.925232	0.404757	0.790003	1.9518	0.411462	2.05647	0.920822	BRIP1										BRIP1	0.474041	1.17117	0.925232
BRPF1	1.02629	1.00129	0.812778	1.02498	0.811735	0.791955	1.03642	1.00411	0.806038	BRPF1	1.02629	1.00129	0.812778	1.02498	0.811735	0.791955	1.03642	1.00411	0.806038	BRPF1
BRPF3	0.894088	1.06993	0.536486	0.835652	0.501422	0.600037	0.858949	1.25883	0.526518	BRPF3	0.894088	1.06993	0.536486	0.835652	0.501422	0.600037	0.858949	1.25883	0.526518	BRPF3
BRS3	0.899587	1.04608	0.897398	0.859961	0.857869	0.997567	0.86754	1.16325	0.893087	BRS3	0.899587	1.04608	0.897398	0.859961	0.857869	0.997567	0.86754	1.16325	0.893087	BRS3
BRSK2_ENST00000308219	0.875113	1.09025	0.188097	0.802673	0.172527	0.214941	0.832516	1.34696	0.183377	BRSK2_ENST00000308219							0.832516	1.34696	0.183377	BRSK2_ENST00000308219
BRSK2_ENST00000528841	0.717779	1.16456	0	0.616354	0	0	0.644156	1.79535	0	BRSK2_ENST00000528841										BRSK2_ENST00000528841
BRWD1	0.750257	1.05942	1.20832	0.708179	1.14055	1.61054	0.701527	1.26171	1.22251	BRWD1	0.750257	1.05942	1.20832	0.708179	1.14055	1.61054	0.701527	1.26171	1.22251	BRWD1
BRWD3	0.910378	1.00021	1.36748	0.910188	1.3672	1.50211	0.887113	1.00074	1.39725	BRWD3	0.910378	1.00021	1.36748	0.910188	1.3672	1.50211	0.887113	1.00074	1.39725	BRWD3
BSG	0.928882	1.04089	0.765299	0.892396	0.735238	0.823892	0.904298	1.14376	0.758656	BSG	0.928882	1.04089	0.765299	0.892396	0.735238	0.823892	0.904298	1.14376	0.758656	BSG
BSN	0.900508	1.05751	0.708159	0.851535	0.669646	0.786399	0.866696	1.20497	0.70008	BSN	0.900508	1.05751	0.708159	0.851535	0.669646	0.786399	0.866696	1.20497	0.70008	BSN
BSND	0.717547	1.08939	1.23982	0.658666	1.13808	1.72786	0.652889	1.36473	1.25481	BSND	0.717547	1.08939	1.23982	0.658666	1.13808	1.72786	0.652889	1.36473	1.25481	BSND
BTAF1	0.796394	1.04172	1.31041	0.764501	1.25794	1.64543	0.751148	1.16586	1.33367	BTAF1	0.796394	1.04172	1.31041	0.764501	1.25794	1.64543	0.751148	1.16586	1.33367	BTAF1
BTBD11	0.955174	1.01717	1.02177	0.939051	1.00452	1.06972	0.938856	1.05712	1.02253	BTBD11	0.955174	1.01717	1.02177	0.939051	1.00452	1.06972	0.938856	1.05712	1.02253	BTBD11
BTBD11_ENST00000357167	1.07114	0.956869	1.26645	1.11943	1.32353	1.18233	1.10118	0.874529	1.27955	BTBD11_ENST00000357167	1.07114	0.956869	1.26645	1.11943	1.32353	1.18233	1.10118	0.874529	1.27955	BTBD11_ENST00000357167
BTBD11_ENST00000490090	0.722828	1.08159	1.64283	0.668301	1.51891	2.27279	0.652952	1.31992	1.67931	BTBD11_ENST00000490090	0.722828	1.08159	1.64283	0.668301	1.51891	2.27279	0.652952	1.31992	1.67931	BTBD11_ENST00000490090
BTBD16	0.978799	0.925384	2.30056	1.05772	2.48606	2.35039	0.970514	0.803728	2.44374	BTBD16										BTBD16
BTBD2	1.17513	0.923648	1.08049	1.27227	1.1698	0.919461	1.264	0.791579	1.08295	BTBD2										BTBD2
BTBD3	0.77885	1.11465	0.477284	0.69874	0.428192	0.612806	0.723082	1.51592	0.466163	BTBD3				0.69874	0.428192	0.612806	0.723082	1.51592	0.466163	BTBD3
BTBD7	0.972731	0.984334	1.38019	0.988212	1.40216	1.41888	0.964218	0.948197	1.40641	BTBD7	0.972731	0.984334	1.38019	0.988212	1.40216	1.41888	0.964218	0.948197	1.40641	BTBD7
BTBD9	1.06533	0.97287	1.05922	1.09504	1.08876	0.99427	1.08866	0.914089	1.06251	BTBD9	1.06533	0.97287	1.05922	1.09504	1.08876	0.99427	1.08866	0.914089	1.06251	BTBD9
BTBD9_ENST00000403056	1.10316	0.955977	1.11396	1.15396	1.16526	1.00979	1.14173	0.865178	1.12052	BTBD9_ENST00000403056	1.10316	0.955977	1.11396	1.15396	1.16526	1.00979	1.14173	0.865178	1.12052	BTBD9_ENST00000403056
BTK	0.606345	1.12159	1.30685	0.54061	1.16517	2.15529	0.534041	1.53428	1.33081	BTK										BTK
BTN1A1	1.08422	0.961035	1.08717	1.12818	1.13125	1.00272	1.11952	0.886056	1.09143	BTN1A1	1.08422	0.961035	1.08717	1.12818	1.13125	1.00272	1.11952	0.886056	1.09143	BTN1A1
BTN2A1	1.04702	1.00005	0.705992	1.04697	0.70596	0.674287	1.06533	1.00015	0.696804	BTN2A1	1.04702	1.00005	0.705992	1.04697	0.70596	0.674287	1.06533	1.00015	0.696804	BTN2A1
BTN2A2	0.815535	1.04767	1.39911	0.778424	1.33545	1.71557	0.763089	1.16879	1.42507	BTN2A2	0.815535	1.04767	1.39911	0.778424	1.33545	1.71557	0.763089	1.16879	1.42507	BTN2A2
BTN3A3	0.841941	1.07948	0.716334	0.779948	0.663589	0.850813	0.795453	1.30859	0.70747	BTN3A3	0.841941	1.07948	0.716334	0.779948	0.663589	0.850813	0.795453	1.30859	0.70747	BTN3A3
BTNL3	0.632627	1.19988	0.148816	0.527242	0.124026	0.235235	0.558535	2.14331	0.142822	BTNL3										BTNL3	0.632627	1.19988	0.148816
BTNL8	1.17288	0.896602	1.53792	1.30814	1.71528	1.31123	1.25147	0.730684	1.5793	BTNL8										BTNL8
BTNL9	1.06957	0.996064	0.605283	1.07379	0.607675	0.565914	1.09855	0.987674	0.595075	BTNL9	1.06957	0.996064	0.605283	1.07379	0.607675	0.565914	1.09855	0.987674	0.595075	BTNL9
BTRC	0.674831	1.09783	1.19344	0.614697	1.08709	1.7685	0.610909	1.42799	1.20673	BTRC										BTRC
BUB1	0.743134	1.1322	0.410604	0.656364	0.362661	0.552531	0.689134	1.67043	0.396436	BUB1				0.656364	0.362661	0.552531	0.689134	1.67043	0.396436	BUB1
BUB1B	0.838666	1.05587	0.99288	0.794288	0.940341	1.18388	0.798059	1.21418	0.992427	BUB1B	0.838666	1.05587	0.99288	0.794288	0.940341	1.18388	0.798059	1.21418	0.992427	BUB1B
BUB1B_ENST00000412359	0.87404	1.0435	0.995793	0.837602	0.954278	1.1393	0.840642	1.16145	0.995525	BUB1B_ENST00000412359	0.87404	1.0435	0.995793	0.837602	0.954278	1.1393	0.840642	1.16145	0.995525	BUB1B_ENST00000412359
BUD13	0.712916	1.11658	0.759296	0.638484	0.680022	1.06506	0.650382	1.55149	0.751205	BUD13							0.650382	1.55149	0.751205	BUD13
BVES	0.890075	1.04222	0.940346	0.854019	0.902254	1.05648	0.859398	1.16014	0.937506	BVES	0.890075	1.04222	0.940346	0.854019	0.902254	1.05648	0.859398	1.16014	0.937506	BVES
C10orf120	1.16589	0.91296	1.33282	1.27704	1.45989	1.14318	1.23323	0.762314	1.36076	C10orf120										C10orf120
C10orf90	1.03097	1.01291	0.619855	1.01783	0.611958	0.601238	1.04212	1.04412	0.609038	C10orf90	1.03097	1.01291	0.619855	1.01783	0.611958	0.601238	1.04212	1.04412	0.609038	C10orf90
C11orf80	0.658289	1.15994	0.460383	0.56752	0.396903	0.699364	0.588299	1.84178	0.44937	C11orf80										C11orf80
C12orf4	0.915509	0.952943	1.83042	0.960718	1.9208	1.99934	0.894132	0.851698	1.93873	C12orf4							0.894132	0.851698	1.93873	C12orf4
C12orf40	0.885619	1.04181	0.881563	0.850079	0.846186	0.99542	0.859492	1.1775	0.875384	C12orf40	0.885619	1.04181	0.881563	0.850079	0.846186	0.99542	0.859492	1.1775	0.875384	C12orf40
C12orf42	1.20538	0.959204	0.366501	1.25665	0.382089	0.304055	1.29536	0.871661	0.357998	C12orf42										C12orf42
C12orf50	0.919876	0.974659	1.55753	0.943793	1.59803	1.6932	0.899085	0.917331	1.61982	C12orf50	0.919876	0.974659	1.55753	0.943793	1.59803	1.6932	0.899085	0.917331	1.61982	C12orf50
C12orf56	1.07375	0.989679	0.746623	1.08495	0.75441	0.695342	1.10306	0.967856	0.736971	C12orf56	1.07375	0.989679	0.746623	1.08495	0.75441	0.695342	1.10306	0.967856	0.736971	C12orf56
C14orf39	0.824256	1.0348	1.10462	0.796535	1.06747	1.34014	0.791559	1.14489	1.11413	C14orf39	0.824256	1.0348	1.10462	0.796535	1.06747	1.34014	0.791559	1.14489	1.11413	C14orf39
C15orf39	0.81922	1.08558	0.885172	0.75464	0.815392	1.08051	0.761314	1.3144	0.881671	C15orf39	0.81922	1.08558	0.885172	0.75464	0.815392	1.08051	0.761314	1.3144	0.881671	C15orf39
C15orf39_ENST00000567617	0.842248	1.06598	1.07903	0.790119	1.01224	1.28113	0.789664	1.23092	1.08195	C15orf39_ENST00000567617	0.842248	1.06598	1.07903	0.790119	1.01224	1.28113	0.789664	1.23092	1.08195	C15orf39_ENST00000567617
C16orf46	1.21322	0.926143	0.881779	1.30997	0.952099	0.726811	1.31373	0.794397	0.877003	C16orf46										C16orf46
C16orf71	0.776948	1.06117	1.3815	0.732165	1.30187	1.77811	0.719386	1.23085	1.40577	C16orf71	0.776948	1.06117	1.3815	0.732165	1.30187	1.77811	0.719386	1.23085	1.40577	C16orf71
C16orf78	0.888097	1.0455	0.950043	0.849446	0.908696	1.06975	0.854418	1.16479	0.947702	C16orf78	0.888097	1.0455	0.950043	0.849446	0.908696	1.06975	0.854418	1.16479	0.947702	C16orf78
C16orf89	1.11481	0.98829	0.555686	1.12802	0.562271	0.498457	1.16566	0.965213	0.542085	C16orf89	1.11481	0.98829	0.555686	1.12802	0.562271	0.498457	1.16566	0.965213	0.542085	C16orf89
C16orf96	0.921223	1.04514	0.763351	0.881434	0.73038	0.828627	0.894144	1.15846	0.756265	C16orf96	0.921223	1.04514	0.763351	0.881434	0.73038	0.828627	0.894144	1.15846	0.756265	C16orf96
C17orf47	0.709647	1.12772	0.768516	0.629278	0.68148	1.08296	0.644643	1.56609	0.758195	C17orf47							0.644643	1.56609	0.758195	C17orf47
C17orf53	0.843756	1.07994	0.67556	0.781296	0.62555	0.800657	0.797802	1.31407	0.666463	C17orf53	0.843756	1.07994	0.67556	0.781296	0.62555	0.800657	0.797802	1.31407	0.666463	C17orf53
C17orf80	0.758489	1.03932	1.59058	0.729795	1.5304	2.09703	0.704217	1.14779	1.64373	C17orf80	0.758489	1.03932	1.59058	0.729795	1.5304	2.09703	0.704217	1.14779	1.64373	C17orf80
C19orf44	0.823622	1.10764	0.206653	0.74358	0.18657	0.250907	0.776	1.48824	0.200356	C19orf44							0.776	1.48824	0.200356	C19orf44
C19orf57	0.956318	1.04172	0.568142	0.918019	0.545389	0.594093	0.940749	1.14655	0.558473	C19orf57	0.956318	1.04172	0.568142	0.918019	0.545389	0.594093	0.940749	1.14655	0.558473	C19orf57
C1orf112	1.02282	1.01995	0.670928	1.00281	0.657802	0.655959	1.03027	1.06984	0.65733	C1orf112	1.02282	1.01995	0.670928	1.00281	0.657802	0.655959	1.03027	1.06984	0.65733	C1orf112
C1orf116	0.9326	1.04538	0.700528	0.89212	0.670121	0.751155	0.90885	1.15715	0.691847	C1orf116	0.9326	1.04538	0.700528	0.89212	0.670121	0.751155	0.90885	1.15715	0.691847	C1orf116
C1orf127	0.856581	1.02535	1.48108	0.835403	1.44446	1.72906	0.812035	1.08275	1.51694	C1orf127	0.856581	1.02535	1.48108	0.835403	1.44446	1.72906	0.812035	1.08275	1.51694	C1orf127
C1orf141	0.77319	1.06254	1.05189	0.727679	0.989977	1.36046	0.728327	1.2622	1.056	C1orf141	0.77319	1.06254	1.05189	0.727679	0.989977	1.36046	0.728327	1.2622	1.056	C1orf141
C1orf87	1.03842	0.971718	1.18485	1.06865	1.21934	1.14101	1.05222	0.913522	1.19726	C1orf87	1.03842	0.971718	1.18485	1.06865	1.21934	1.14101	1.05222	0.913522	1.19726	C1orf87
C1orf94	1.12935	0.939957	1.11215	1.20149	1.1832	0.984777	1.19004	0.833795	1.11706	C1orf94							1.19004	0.833795	1.11706	C1orf94
C1QTNF2	1.11077	0.966023	0.717519	1.14984	0.742755	0.645964	1.16477	0.903733	0.710213	C1QTNF2	1.11077	0.966023	0.717519	1.14984	0.742755	0.645964	1.16477	0.903733	0.710213	C1QTNF2
C1R	0.947993	1.07045	0.29879	0.885606	0.279127	0.315182	0.929171	1.25184	0.288844	C1R				0.885606	0.279127	0.315182	0.929171	1.25184	0.288844	C1R
C1RL	1.00654	0.989991	1.12008	1.01671	1.1314	1.1128	1.00894	0.968455	1.12614	C1RL	1.00654	0.989991	1.12008	1.01671	1.1314	1.1128	1.00894	0.968455	1.12614	C1RL
C1S	1.0726	0.998301	0.649996	1.07443	0.651102	0.606	1.09983	0.994427	0.638394	C1S	1.0726	0.998301	0.649996	1.07443	0.651102	0.606	1.09983	0.994427	0.638394	C1S
C2	0.982589	1.05891	0	0.927926	0	0	0.976174	1.21881	0	C2										C2
C20orf194	0.564894	1.15035	1.18135	0.491065	1.02695	2.09128	0.490243	1.74859	1.19178	C20orf194										C20orf194
C2CD2	0.895096	1.0728	0.478469	0.834357	0.446001	0.534545	0.859842	1.26968	0.468691	C2CD2	0.895096	1.0728	0.478469	0.834357	0.446001	0.534545	0.859842	1.26968	0.468691	C2CD2
C2CD2L	0.727099	1.12177	0.763468	0.64817	0.680591	1.05002	0.657482	1.53493	0.757555	C2CD2L				0.64817	0.680591	1.05002	0.657482	1.53493	0.757555	C2CD2L
C2CD3	0.921523	1.03375	0.925314	0.89144	0.895107	1.00411	0.897331	1.12107	0.921949	C2CD3	0.921523	1.03375	0.925314	0.89144	0.895107	1.00411	0.897331	1.12107	0.921949	C2CD3
C2orf16	0.922244	1.02478	0.999665	0.899939	0.975488	1.08395	0.901537	1.09314	0.999645	C2orf16	0.922244	1.02478	0.999665	0.899939	0.975488	1.08395	0.901537	1.09314	0.999645	C2orf16
C2orf42	0.783643	1.14706	0.169712	0.683178	0.147955	0.216568	0.725483	1.6674	0.162616	C2orf42							0.725483	1.6674	0.162616	C2orf42
C2orf78	0.954551	1.02256	0.923983	0.933487	0.903594	0.967977	0.939747	1.07699	0.920199	C2orf78	0.954551	1.02256	0.923983	0.933487	0.903594	0.967977	0.939747	1.07699	0.920199	C2orf78
C3	0.884934	1.04582	1.05183	0.84616	1.00574	1.1886	0.84587	1.15363	1.05426	C3	0.884934	1.04582	1.05183	0.84616	1.00574	1.1886	0.84587	1.15363	1.05426	C3
C3AR1	0.911672	1.04069	0.884404	0.876023	0.849821	0.970089	0.883687	1.14628	0.879888	C3AR1	0.911672	1.04069	0.884404	0.876023	0.849821	0.970089	0.883687	1.14628	0.879888	C3AR1
C3orf20	0.871659	1.05541	0.962979	0.825895	0.91242	1.10476	0.829982	1.19508	0.96148	C3orf20	0.871659	1.05541	0.962979	0.825895	0.91242	1.10476	0.829982	1.19508	0.96148	C3orf20
C3orf30	0.959447	1.04058	0.657504	0.922033	0.631864	0.685294	0.948238	1.15927	0.643895	C3orf30	0.959447	1.04058	0.657504	0.922033	0.631864	0.685294	0.948238	1.15927	0.643895	C3orf30
C3orf67	0.661818	1.12706	0.840838	0.587205	0.746042	1.2705	0.59858	1.61838	0.832822	C3orf67										C3orf67
C3orf67_ENST00000482387	0.782883	1.10368	0.656086	0.709339	0.594453	0.838038	0.731504	1.45394	0.642858	C3orf67_ENST00000482387				0.709339	0.594453	0.838038	0.731504	1.45394	0.642858	C3orf67_ENST00000482387
C4BPA	0.92021	1.01675	1.10046	0.905054	1.08234	1.19588	0.898706	1.05877	1.10833	C4BPA	0.92021	1.01675	1.10046	0.905054	1.08234	1.19588	0.898706	1.05877	1.10833	C4BPA
C5	0.927545	1.01564	1.12396	0.913265	1.10666	1.21176	0.906346	1.05445	1.13199	C5	0.927545	1.01564	1.12396	0.913265	1.10666	1.21176	0.906346	1.05445	1.13199	C5
C5AR1	1.14306	0.980939	0	1.16527	0	0	1.22199	0.94639	0	C5AR1										C5AR1
C5orf34	0.77618	1.0557	1.14196	0.735231	1.08171	1.47126	0.730454	1.23103	1.15288	C5orf34	0.77618	1.0557	1.14196	0.735231	1.08171	1.47126	0.730454	1.23103	1.15288	C5orf34
C6	1.03973	0.972518	1.16052	1.06912	1.19331	1.11617	1.05291	0.913923	1.17265	C6	1.03973	0.972518	1.16052	1.06912	1.19331	1.11617	1.05291	0.913923	1.17265	C6
C6orf118	1.00621	1.02796	0.573795	0.978841	0.558188	0.570255	1.0085	1.09408	0.56153	C6orf118	1.00621	1.02796	0.573795	0.978841	0.558188	0.570255	1.0085	1.09408	0.56153	C6orf118
C6orf222	0.945105	1.06826	0.264781	0.884716	0.247862	0.28016	0.926664	1.25938	0.25608	C6orf222				0.884716	0.247862	0.28016	0.926664	1.25938	0.25608	C6orf222
C7	0.907702	1.03765	0.920172	0.874766	0.886784	1.01374	0.882692	1.13995	0.915451	C7	0.907702	1.03765	0.920172	0.874766	0.886784	1.01374	0.882692	1.13995	0.915451	C7
C7orf31	0.994318	1.04096	0.513777	0.955194	0.493562	0.516714	0.992532	1.15277	0.499263	C7orf31	0.994318	1.04096	0.513777	0.955194	0.493562	0.516714	0.992532	1.15277	0.499263	C7orf31
C8A	0.616602	1.12196	1.20825	0.549577	1.07691	1.95953	0.546558	1.55558	1.22273	C8A										C8A
C8B	0.776622	1.09001	0.875188	0.712492	0.802919	1.12692	0.723947	1.36916	0.868202	C8B	0.776622	1.09001	0.875188	0.712492	0.802919	1.12692	0.723947	1.36916	0.868202	C8B
C8orf34	0.854349	1.0252	1.35417	0.833349	1.32089	1.58504	0.815219	1.08925	1.38107	C8orf34	0.854349	1.0252	1.35417	0.833349	1.32089	1.58504	0.815219	1.08925	1.38107	C8orf34
C9	0.901147	1.01335	1.25498	0.889274	1.23844	1.39265	0.874598	1.04781	1.27346	C9	0.901147	1.01335	1.25498	0.889274	1.23844	1.39265	0.874598	1.04781	1.27346	C9
C9orf131	0.669807	1.09655	1.36342	0.61083	1.24337	2.03554	0.601352	1.40675	1.38896	C9orf131										C9orf131
C9orf131_ENST00000421362	0.650049	1.12112	1.114	0.579821	0.993653	1.71372	0.580058	1.55054	1.12043	C9orf131_ENST00000421362										C9orf131_ENST00000421362
C9orf3	0.926797	1.0347	0.868938	0.895717	0.839798	0.937572	0.905388	1.12848	0.862936	C9orf3	0.926797	1.0347	0.868938	0.895717	0.839798	0.937572	0.905388	1.12848	0.862936	C9orf3
C9orf43	0.818222	1.055	1.14401	0.775564	1.08437	1.39817	0.771094	1.20779	1.15301	C9orf43	0.818222	1.055	1.14401	0.775564	1.08437	1.39817	0.771094	1.20779	1.15301	C9orf43
C9orf50	0.700939	1.11262	1.25826	0.629992	1.1309	1.7951	0.625387	1.44671	1.27197	C9orf50										C9orf50
CA10	0.837734	1.09801	0.463495	0.762954	0.422121	0.553272	0.792238	1.4069	0.451484	CA10	0.837734	1.09801	0.463495	0.762954	0.422121	0.553272	0.792238	1.4069	0.451484	CA10
CA4	1.25441	0.934947	0.391489	1.34169	0.418728	0.31209	1.39415	0.825468	0.38022	CA4										CA4
CA8	0.860221	1.02243	1.39773	0.841349	1.36707	1.62485	0.819309	1.0743	1.4302	CA8	0.860221	1.02243	1.39773	0.841349	1.36707	1.62485	0.819309	1.0743	1.4302	CA8
CA9	0.651161	1.14309	1.06478	0.569648	0.931486	1.6352	0.571722	1.6337	1.0675	CA9										CA9
CABIN1	0.811186	1.08279	0.89216	0.749162	0.823944	1.09982	0.756351	1.3186	0.888271	CABIN1	0.811186	1.08279	0.89216	0.749162	0.823944	1.09982	0.756351	1.3186	0.888271	CABIN1
CABP4	1.12364	0.953921	0.929281	1.17792	0.97417	0.827028	1.17912	0.862975	0.927352	CABP4	1.12364	0.953921	0.929281	1.17792	0.97417	0.827028	1.17912	0.862975	0.927352	CABP4
CABS1	1.12211	0.951781	1.21512	1.17896	1.27668	1.08289	1.16363	0.838466	1.22521	CABS1	1.12211	0.951781	1.21512	1.17896	1.27668	1.08289	1.16363	0.838466	1.22521	CABS1
CACHD1	1.04287	0.975647	1.14346	1.0689	1.172	1.09645	1.05857	0.922998	1.15072	CACHD1	1.04287	0.975647	1.14346	1.0689	1.172	1.09645	1.05857	0.922998	1.15072	CACHD1
CACNA1A	1.05241	0.993979	0.720152	1.05878	0.724514	0.684291	1.074	0.981101	0.712453	CACNA1A	1.05241	0.993979	0.720152	1.05878	0.724514	0.684291	1.074	0.981101	0.712453	CACNA1A
CACNA1A_ENST00000360228	1.05758	0.991533	0.72674	1.06662	0.732946	0.687169	1.08148	0.973562	0.719149	CACNA1A_ENST00000360228	1.05758	0.991533	0.72674	1.06662	0.732946	0.687169	1.08148	0.973562	0.719149	CACNA1A_ENST00000360228
CACNA1B	1.09624	0.983993	0.484066	1.11407	0.49194	0.441569	1.14057	0.951663	0.4758	CACNA1B	1.09624	0.983993	0.484066	1.11407	0.49194	0.441569	1.14057	0.951663	0.4758	CACNA1B
CACNA1B_ENST00000277549	1.06183	1.00163	0.428069	1.0601	0.427373	0.403144	1.08897	1.0051	0.419875	CACNA1B_ENST00000277549	1.06183	1.00163	0.428069	1.0601	0.427373	0.403144	1.08897	1.0051	0.419875	CACNA1B_ENST00000277549
CACNA1B_ENST00000371355	0.975368	1.02626	0.669471	0.950408	0.652339	0.686378	0.965757	1.08683	0.662105	CACNA1B_ENST00000371355	0.975368	1.02626	0.669471	0.950408	0.652339	0.686378	0.965757	1.08683	0.662105	CACNA1B_ENST00000371355
CACNA1C	1.12241	0.921166	1.50234	1.21846	1.63091	1.3385	1.18214	0.792404	1.52978	CACNA1C							1.18214	0.792404	1.52978	CACNA1C
CACNA1C_ENST00000344100	1.0968	0.931981	1.50877	1.17684	1.61889	1.37562	1.14242	0.817321	1.53668	CACNA1C_ENST00000344100				1.17684	1.61889	1.37562	1.14242	0.817321	1.53668	CACNA1C_ENST00000344100
CACNA1C_ENST00000399617	1.12814	0.926363	1.35479	1.21781	1.46248	1.20091	1.19095	0.804026	1.37222	CACNA1C_ENST00000399617										CACNA1C_ENST00000399617
CACNA1C_ENST00000399634	1.12908	0.921688	1.44109	1.22501	1.56353	1.27634	1.19243	0.793216	1.46406	CACNA1C_ENST00000399634										CACNA1C_ENST00000399634
CACNA1D	1.04037	0.986085	0.968492	1.05505	0.982159	0.930909	1.05619	0.957039	0.967095	CACNA1D	1.04037	0.986085	0.968492	1.05505	0.982159	0.930909	1.05619	0.957039	0.967095	CACNA1D
CACNA1D_ENST00000350061	1.09078	0.958975	1.08192	1.13744	1.1282	0.991879	1.12889	0.880146	1.08592	CACNA1D_ENST00000350061	1.09078	0.958975	1.08192	1.13744	1.1282	0.991879	1.12889	0.880146	1.08592	CACNA1D_ENST00000350061
CACNA1E	0.940775	1.02784	0.948715	0.915298	0.923023	1.00844	0.919019	1.09147	0.946819	CACNA1E	0.940775	1.02784	0.948715	0.915298	0.923023	1.00844	0.919019	1.09147	0.946819	CACNA1E
CACNA1E_ENST00000357570	0.808614	1.07547	1.09003	0.75187	1.01354	1.34803	0.751331	1.27784	1.09391	CACNA1E_ENST00000357570	0.808614	1.07547	1.09003	0.75187	1.01354	1.34803	0.751331	1.27784	1.09391	CACNA1E_ENST00000357570
CACNA1E_ENST00000358338	0.733355	1.10189	1.20995	0.665544	1.09807	1.64989	0.662132	1.39785	1.21991	CACNA1E_ENST00000358338				0.665544	1.09807	1.64989	0.662132	1.39785	1.21991	CACNA1E_ENST00000358338
CACNA1E_ENST00000367567	0.922562	1.04685	0.746174	0.881274	0.71278	0.808806	0.894753	1.16036	0.738882	CACNA1E_ENST00000367567	0.922562	1.04685	0.746174	0.881274	0.71278	0.808806	0.894753	1.16036	0.738882	CACNA1E_ENST00000367567
CACNA1F	0.830566	1.07637	0.899609	0.771638	0.835782	1.08313	0.777702	1.28464	0.896452	CACNA1F	0.830566	1.07637	0.899609	0.771638	0.835782	1.08313	0.777702	1.28464	0.896452	CACNA1F
CACNA1G	0.971845	0.9902	1.47158	0.981463	1.48614	1.51421	0.960892	0.969957	1.49439	CACNA1G	0.971845	0.9902	1.47158	0.981463	1.48614	1.51421	0.960892	0.969957	1.49439	CACNA1G
CACNA1G_ENST00000354983	0.965368	0.995398	1.4208	0.969831	1.42737	1.47177	0.952001	0.985742	1.44031	CACNA1G_ENST00000354983	0.965368	0.995398	1.4208	0.969831	1.42737	1.47177	0.952001	0.985742	1.44031	CACNA1G_ENST00000354983
CACNA1G_ENST00000416767	1.02009	0.956921	1.77232	1.06601	1.85211	1.73742	1.02841	0.875956	1.81657	CACNA1G_ENST00000416767				1.06601	1.85211	1.73742	1.02841	0.875956	1.81657	CACNA1G_ENST00000416767
CACNA1H	0.913931	1.00849	1.64913	0.906234	1.63524	1.80444	0.883203	1.02728	1.68201	CACNA1H	0.913931	1.00849	1.64913	0.906234	1.63524	1.80444	0.883203	1.02728	1.68201	CACNA1H
CACNA1H_ENST00000358590	0.919012	1.00714	1.6298	0.9125	1.61825	1.77342	0.889862	1.02284	1.66138	CACNA1H_ENST00000358590	0.919012	1.00714	1.6298	0.9125	1.61825	1.77342	0.889862	1.02284	1.66138	CACNA1H_ENST00000358590
CACNA1I	0.917997	1.05582	0.511856	0.869465	0.484795	0.557578	0.888365	1.19902	0.504409	CACNA1I	0.917997	1.05582	0.511856	0.869465	0.484795	0.557578	0.888365	1.19902	0.504409	CACNA1I
CACNA1S	1.10862	0.952189	0.955062	1.16429	1.00302	0.861485	1.16411	0.871341	0.953504	CACNA1S	1.10862	0.952189	0.955062	1.16429	1.00302	0.861485	1.16411	0.871341	0.953504	CACNA1S
CACNA2D1	0.730993	1.0797	1.15237	0.677036	1.06731	1.57644	0.673931	1.33913	1.16209	CACNA2D1	0.730993	1.0797	1.15237	0.677036	1.06731	1.57644	0.673931	1.33913	1.16209	CACNA2D1
CACNA2D1_ENST00000356253	0.80752	1.04345	1.297	0.773894	1.24299	1.60615	0.761325	1.16677	1.31832	CACNA2D1_ENST00000356253	0.80752	1.04345	1.297	0.773894	1.24299	1.60615	0.761325	1.16677	1.31832	CACNA2D1_ENST00000356253
CACNA2D2	1.07682	1.01302	0.21788	1.06298	0.215081	0.202338	1.11117	1.04099	0.211109	CACNA2D2							1.11117	1.04099	0.211109	CACNA2D2
CACNA2D3	1.15766	0.903622	1.57304	1.28113	1.74082	1.35881	1.22761	0.743209	1.61486	CACNA2D3										CACNA2D3
CACNA2D4	1.06953	0.93767	1.57401	1.14062	1.67864	1.47169	1.09924	0.827948	1.61252	CACNA2D4				1.14062	1.67864	1.47169	1.09924	0.827948	1.61252	CACNA2D4
CACNB2	0.847713	1.05396	0.99645	0.804313	0.945435	1.17546	0.806974	1.21055	0.996282	CACNB2	0.847713	1.05396	0.99645	0.804313	0.945435	1.17546	0.806974	1.21055	0.996282	CACNB2
CACNB2_ENST00000282343	0.784606	1.03999	1.55291	0.754439	1.4932	1.97922	0.732532	1.15061	1.59503	CACNB2_ENST00000282343	0.784606	1.03999	1.55291	0.754439	1.4932	1.97922	0.732532	1.15061	1.59503	CACNB2_ENST00000282343
CACNB2_ENST00000352115	0.794008	1.07426	0.977251	0.739123	0.909699	1.23078	0.743413	1.30417	0.97613	CACNB2_ENST00000352115	0.794008	1.07426	0.977251	0.739123	0.909699	1.23078	0.743413	1.30417	0.97613	CACNB2_ENST00000352115
CACNB2_ENST00000377315	0.871364	1.03965	1.09178	0.838133	1.05014	1.25295	0.835632	1.14889	1.0965	CACNB2_ENST00000377315	0.871364	1.03965	1.09178	0.838133	1.05014	1.25295	0.835632	1.14889	1.0965	CACNB2_ENST00000377315
CACNB2_ENST00000377319	0.810172	1.07669	0.861048	0.752468	0.799721	1.0628	0.762027	1.31587	0.855189	CACNB2_ENST00000377319	0.810172	1.07669	0.861048	0.752468	0.799721	1.0628	0.762027	1.31587	0.855189	CACNB2_ENST00000377319
CACNB2_ENST00000377329	0.829204	1.05864	1.01713	0.783271	0.960791	1.22664	0.785127	1.23337	1.01796	CACNB2_ENST00000377329	0.829204	1.05864	1.01713	0.783271	0.960791	1.22664	0.785127	1.23337	1.01796	CACNB2_ENST00000377329
CACNB3	0.816498	1.0221	1.82321	0.798841	1.78379	2.23297	0.763741	1.07344	1.89253	CACNB3				0.798841	1.78379	2.23297	0.763741	1.07344	1.89253	CACNB3
CACNB4	0.955186	1.01078	1.07512	0.945004	1.06366	1.12556	0.941035	1.03673	1.07935	CACNB4	0.955186	1.01078	1.07512	0.945004	1.06366	1.12556	0.941035	1.03673	1.07935	CACNB4
CACNB4_ENST00000534999	0.947209	1.00009	1.24558	0.94712	1.24546	1.315	0.931121	1.00031	1.26284	CACNB4_ENST00000534999	0.947209	1.00009	1.24558	0.94712	1.24546	1.315	0.931121	1.00031	1.26284	CACNB4_ENST00000534999
CACNG3	1.03108	0.979963	1.14885	1.05217	1.17234	1.11421	1.04362	0.938682	1.15495	CACNG3	1.03108	0.979963	1.14885	1.05217	1.17234	1.11421	1.04362	0.938682	1.15495	CACNG3
CACNG4	1.1078	0.975479	0.511953	1.13565	0.524822	0.462134	1.16104	0.929355	0.503751	CACNG4	1.1078	0.975479	0.511953	1.13565	0.524822	0.462134	1.16104	0.929355	0.503751	CACNG4
CACNG5	1.25332	0.919387	0.478931	1.36321	0.520924	0.38213	1.3971	0.787476	0.46979	CACNG5										CACNG5
CACNG7	1.07571	0.993997	0.522278	1.0822	0.525432	0.48552	1.10936	0.981638	0.512911	CACNG7	1.07571	0.993997	0.522278	1.0822	0.525432	0.48552	1.10936	0.981638	0.512911	CACNG7
CACNG8	1.10241	0.950526	1.19287	1.15978	1.25495	1.08206	1.1501	0.856928	1.19843	CACNG8	1.10241	0.950526	1.19287	1.15978	1.25495	1.08206	1.1501	0.856928	1.19843	CACNG8
CAD	0.869645	1.0681	0.776216	0.814197	0.726725	0.892566	0.825012	1.24203	0.770168	CAD	0.869645	1.0681	0.776216	0.814197	0.726725	0.892566	0.825012	1.24203	0.770168	CAD
CADM1	1.04264	0.996706	0.752088	1.04609	0.754574	0.721331	1.0597	0.989518	0.744797	CADM1	1.04264	0.996706	0.752088	1.04609	0.754574	0.721331	1.0597	0.989518	0.744797	CADM1
CADM2	0.707699	1.0738	1.51045	0.659062	1.40664	2.13431	0.644891	1.30995	1.54374	CADM2				0.659062	1.40664	2.13431	0.644891	1.30995	1.54374	CADM2
CADM2_ENST00000383699	0.732304	1.06646	1.41305	0.686669	1.325	1.9296	0.672951	1.26782	1.44256	CADM2_ENST00000383699	0.732304	1.06646	1.41305	0.686669	1.325	1.9296	0.672951	1.26782	1.44256	CADM2_ENST00000383699
CADM3	0.991387	1.0038	0.997532	0.987637	0.993759	1.0062	0.987997	1.01172	0.997425	CADM3	0.991387	1.0038	0.997532	0.987637	0.993759	1.0062	0.987997	1.01172	0.997425	CADM3
CADPS	0.870722	1.02373	1.3366	0.850539	1.30562	1.53505	0.833523	1.08188	1.36053	CADPS	0.870722	1.02373	1.3366	0.850539	1.30562	1.53505	0.833523	1.08188	1.36053	CADPS
CADPS2	1.04259	1.00305	0.784995	1.03942	0.782607	0.752929	1.05667	1.0104	0.774885	CADPS2	1.04259	1.00305	0.784995	1.03942	0.782607	0.752929	1.05667	1.0104	0.774885	CADPS2
CADPS2_ENST00000313070	1.05659	0.976161	1.06176	1.08239	1.08769	1.00489	1.07509	0.922966	1.06591	CADPS2_ENST00000313070	1.05659	0.976161	1.06176	1.08239	1.08769	1.00489	1.07509	0.922966	1.06591	CADPS2_ENST00000313070
CAGE1	0.952002	1.02413	0.901904	0.929575	0.880657	0.947376	0.938993	1.08868	0.895773	CAGE1	0.952002	1.02413	0.901904	0.929575	0.880657	0.947376	0.938993	1.08868	0.895773	CAGE1
CAGE1_ENST00000338150	0.919838	1.01955	1.06696	0.902203	1.0465	1.15994	0.898675	1.07019	1.07197	CAGE1_ENST00000338150	0.919838	1.01955	1.06696	0.902203	1.0465	1.15994	0.898675	1.07019	1.07197	CAGE1_ENST00000338150
CALCOCO1	0.934855	0.999063	1.37162	0.935732	1.37291	1.4672	0.913139	0.99704	1.39816	CALCOCO1	0.934855	0.999063	1.37162	0.935732	1.37291	1.4672	0.913139	0.99704	1.39816	CALCOCO1
CALCR	1.03427	0.960884	1.31449	1.07637	1.36801	1.27094	1.04724	0.887481	1.33925	CALCR	1.03427	0.960884	1.31449	1.07637	1.36801	1.27094	1.04724	0.887481	1.33925	CALCR
CALCRL	0.855122	1.07779	0.693609	0.793403	0.643547	0.811123	0.816707	1.30931	0.680204	CALCRL	0.855122	1.07779	0.693609	0.793403	0.643547	0.811123	0.816707	1.30931	0.680204	CALCRL
CALD1	0.880398	1.04548	0.942859	0.8421	0.901843	1.07095	0.848847	1.17034	0.939325	CALD1	0.880398	1.04548	0.942859	0.8421	0.901843	1.07095	0.848847	1.17034	0.939325	CALD1
CALD1_ENST00000393118	0.593202	1.11969	1.35102	0.529791	1.2066	2.2775	0.521834	1.53462	1.37933	CALD1_ENST00000393118										CALD1_ENST00000393118
CALN1	1.12573	0.960937	0.849634	1.17149	0.884172	0.75474	1.17916	0.882812	0.844166	CALN1	1.12573	0.960937	0.849634	1.17149	0.884172	0.75474	1.17916	0.882812	0.844166	CALN1
CALR	0.814748	1.01806	1.78705	0.800298	1.75535	2.19337	0.764048	1.06069	1.85795	CALR				0.800298	1.75535	2.19337	0.764048	1.06069	1.85795	CALR
CALR3	1.05315	1.03259	0.395379	1.01991	0.382902	0.375426	1.07237	1.11273	0.380868	CALR3	1.05315	1.03259	0.395379	1.01991	0.382902	0.375426	1.07237	1.11273	0.380868	CALR3
CAMK1D	0.956302	1.02476	0.878305	0.933196	0.857083	0.918439	0.941176	1.08387	0.873485	CAMK1D	0.956302	1.02476	0.878305	0.933196	0.857083	0.918439	0.941176	1.08387	0.873485	CAMK1D
CAMK1G	1.12248	0.953744	0.923896	1.17692	0.968704	0.823086	1.17924	0.870913	0.920587	CAMK1G	1.12248	0.953744	0.923896	1.17692	0.968704	0.823086	1.17924	0.870913	0.920587	CAMK1G
CAMK2A	1.01214	0.990079	1.07763	1.02228	1.08843	1.06471	1.01714	0.970452	1.08119	CAMK2A	1.01214	0.990079	1.07763	1.02228	1.08843	1.06471	1.01714	0.970452	1.08119	CAMK2A
CAMK2B	1.02872	1.02928	0.171304	0.99946	0.166431	0.166521	1.04083	1.09685	0.166458	CAMK2B							1.04083	1.09685	0.166458	CAMK2B
CAMK2G	0.948291	1.03638	0.739792	0.915002	0.713822	0.780132	0.929675	1.1237	0.731907	CAMK2G	0.948291	1.03638	0.739792	0.915002	0.713822	0.780132	0.929675	1.1237	0.731907	CAMK2G
CAMK2G_ENST00000322635	0.976398	1.01402	0.927702	0.962899	0.914876	0.950127	0.967436	1.04494	0.924948	CAMK2G_ENST00000322635	0.976398	1.01402	0.927702	0.962899	0.914876	0.950127	0.967436	1.04494	0.924948	CAMK2G_ENST00000322635
CAMK4	0.896183	1.0727	0.485679	0.835445	0.452763	0.541943	0.864296	1.28307	0.474186	CAMK4	0.896183	1.0727	0.485679	0.835445	0.452763	0.541943	0.864296	1.28307	0.474186	CAMK4
CAMKK1	0.98938	1.00398	1.0109	0.985455	1.00689	1.02175	0.985105	1.01229	1.01132	CAMKK1	0.98938	1.00398	1.0109	0.985455	1.00689	1.02175	0.985105	1.01229	1.01132	CAMKK1
CAMKK2	0.910734	1.05048	0.751413	0.866967	0.715302	0.825063	0.879867	1.17731	0.74431	CAMKK2	0.910734	1.05048	0.751413	0.866967	0.715302	0.825063	0.879867	1.17731	0.74431	CAMKK2
CAMKK2_ENST00000392473	0.902565	1.04948	0.840028	0.860009	0.80042	0.930712	0.868761	1.17189	0.835029	CAMKK2_ENST00000392473	0.902565	1.04948	0.840028	0.860009	0.80042	0.930712	0.868761	1.17189	0.835029	CAMKK2_ENST00000392473
CAMKK2_ENST00000392474	0.80221	1.08948	0.875245	0.736324	0.803361	1.09104	0.74368	1.34436	0.871188	CAMKK2_ENST00000392474	0.80221	1.08948	0.875245	0.736324	0.803361	1.09104	0.74368	1.34436	0.871188	CAMKK2_ENST00000392474
CAMKV	0.749285	1.11749	0.69963	0.670509	0.626075	0.933731	0.682768	1.50235	0.692183	CAMKV				0.670509	0.626075	0.933731	0.682768	1.50235	0.692183	CAMKV
CAMSAP1	0.953647	1.03244	0.730072	0.923684	0.707133	0.765558	0.937852	1.11513	0.722403	CAMSAP1	0.953647	1.03244	0.730072	0.923684	0.707133	0.765558	0.937852	1.11513	0.722403	CAMSAP1
CAMSAP1_ENST00000409386	0.980149	1.02665	0.653699	0.954705	0.63673	0.666939	0.973134	1.09315	0.64482	CAMSAP1_ENST00000409386	0.980149	1.02665	0.653699	0.954705	0.63673	0.666939	0.973134	1.09315	0.64482	CAMSAP1_ENST00000409386
CAMSAP2	0.849962	1.04568	1.00617	0.812836	0.96222	1.18378	0.81592	1.17321	1.0067	CAMSAP2	0.849962	1.04568	1.00617	0.812836	0.96222	1.18378	0.81592	1.17321	1.0067	CAMSAP2
CAMSAP3	0.948425	0.998616	1.4873	0.949739	1.48936	1.56818	0.929027	0.995697	1.512	CAMSAP3	0.948425	0.998616	1.4873	0.949739	1.48936	1.56818	0.929027	0.995697	1.512	CAMSAP3
CAMTA1	1.18593	0.935869	0.864864	1.2672	0.924129	0.72927	1.27262	0.818612	0.85988	CAMTA1										CAMTA1
CAMTA2	0.929521	1.02712	1.04097	0.904977	1.01349	1.1199	0.90432	1.08934	1.04269	CAMTA2	0.929521	1.02712	1.04097	0.904977	1.01349	1.1199	0.90432	1.08934	1.04269	CAMTA2
CAMTA2_ENST00000381311	0.886128	1.04983	0.966724	0.844069	0.920839	1.09095	0.847697	1.17199	0.965432	CAMTA2_ENST00000381311	0.886128	1.04983	0.966724	0.844069	0.920839	1.09095	0.847697	1.17199	0.965432	CAMTA2_ENST00000381311
CAND1	0.791881	1.05781	1.16797	0.748603	1.10414	1.47493	0.744014	1.24105	1.17734	CAND1	0.791881	1.05781	1.16797	0.748603	1.10414	1.47493	0.744014	1.24105	1.17734	CAND1
CAND2	1.08672	0.959162	1.07625	1.13299	1.12207	0.990365	1.12735	0.883385	1.0787	CAND2	1.08672	0.959162	1.07625	1.13299	1.12207	0.990365	1.12735	0.883385	1.0787	CAND2
CANT1	0.994435	0.999926	1.03962	0.994508	1.0397	1.04544	0.992274	0.999772	1.04137	CANT1	0.994435	0.999926	1.03962	0.994508	1.0397	1.04544	0.992274	0.999772	1.04137	CANT1
CANX	1.18935	0.941274	0.95244	1.26356	1.01186	0.800805	1.26257	0.820367	0.950038	CANX										CANX
CAP2	0.897798	1.09201	0.246999	0.822151	0.226187	0.275116	0.867885	1.385	0.237406	CAP2				0.822151	0.226187	0.275116	0.867885	1.385	0.237406	CAP2
CAPN1	1.07548	0.925227	1.69315	1.1624	1.82998	1.57432	1.1086	0.801076	1.74606	CAPN1				1.1624	1.82998	1.57432	1.1086	0.801076	1.74606	CAPN1
CAPN10	1.12669	0.956481	0.870966	1.17795	0.910593	0.773033	1.18412	0.87517	0.86605	CAPN10				1.17795	0.910593	0.773033	1.18412	0.87517	0.86605	CAPN10
CAPN11	1.02974	0.971777	1.25227	1.05965	1.28863	1.2161	1.04113	0.915331	1.26735	CAPN11	1.02974	0.971777	1.25227	1.05965	1.28863	1.2161	1.04113	0.915331	1.26735	CAPN11
CAPN12	1.0323	0.971906	1.28849	1.06214	1.32573	1.24818	1.04516	0.915225	1.30256	CAPN12	1.0323	0.971906	1.28849	1.06214	1.32573	1.24818	1.04516	0.915225	1.30256	CAPN12
CAPN13	0.925934	1.06915	0.43972	0.866048	0.41128	0.474893	0.901671	1.25763	0.427324	CAPN13	0.925934	1.06915	0.43972	0.866048	0.41128	0.474893	0.901671	1.25763	0.427324	CAPN13
CAPN14	0.718878	1.11261	1.05076	0.646117	0.944411	1.46167	0.648597	1.44657	1.05356	CAPN14				0.646117	0.944411	1.46167	0.648597	1.44657	1.05356	CAPN14
CAPN2	0.748036	1.14643	0.502771	0.652494	0.438555	0.672122	0.679882	1.61341	0.4896	CAPN2				0.652494	0.438555	0.672122	0.679882	1.61341	0.4896	CAPN2
CAPN3	0.858767	1.07981	0.602707	0.795293	0.558159	0.701827	0.815935	1.30952	0.592454	CAPN3	0.858767	1.07981	0.602707	0.795293	0.558159	0.701827	0.815935	1.30952	0.592454	CAPN3
CAPN3_ENST00000318023	0.780952	1.13535	0.219177	0.687854	0.193048	0.280653	0.72168	1.60906	0.211879	CAPN3_ENST00000318023							0.72168	1.60906	0.211879	CAPN3_ENST00000318023
CAPN3_ENST00000356316	0.940084	1.02596	0.944013	0.916293	0.920122	1.00418	0.919507	1.09088	0.942277	CAPN3_ENST00000356316	0.940084	1.02596	0.944013	0.916293	0.920122	1.00418	0.919507	1.09088	0.942277	CAPN3_ENST00000356316
CAPN5	0.976748	1.0025	1.11869	0.974315	1.1159	1.14532	0.96789	1.00776	1.12441	CAPN5	0.976748	1.0025	1.11869	0.974315	1.1159	1.14532	0.96789	1.00776	1.12441	CAPN5
CAPN6	0.90398	1.05999	0.66423	0.852821	0.626639	0.734783	0.873868	1.22196	0.653298	CAPN6	0.90398	1.05999	0.66423	0.852821	0.626639	0.734783	0.873868	1.22196	0.653298	CAPN6
CAPN7	0.524456	1.0902	1.86922	0.481064	1.71457	3.56411	0.45536	1.37772	1.97879	CAPN7										CAPN7
CAPN9	0.77187	1.09598	0.934765	0.704275	0.852906	1.21104	0.710931	1.37778	0.931817	CAPN9	0.77187	1.09598	0.934765	0.704275	0.852906	1.21104	0.710931	1.37778	0.931817	CAPN9
CAPRIN1	0.575815	1.15152	0.958592	0.500049	0.83246	1.66476	0.506931	1.7632	0.956004	CAPRIN1										CAPRIN1
CAPRIN1_ENST00000389645	0.496775	1.16767	1.08426	0.425441	0.928564	2.18259	0.427958	1.89202	1.09037	CAPRIN1_ENST00000389645										CAPRIN1_ENST00000389645	0.496775	1.16767	1.08426
CAPRIN2	1.05351	0.956508	1.27172	1.10141	1.32955	1.20713	1.07124	0.86898	1.29631	CAPRIN2	1.05351	0.956508	1.27172	1.10141	1.32955	1.20713	1.07124	0.86898	1.29631	CAPRIN2
CAPRIN2_ENST00000417045	1.0879	0.915294	1.56251	1.18858	1.70711	1.43626	1.11825	0.766543	1.62935	CAPRIN2_ENST00000417045							1.11825	0.766543	1.62935	CAPRIN2_ENST00000417045
CAPSL	0.71333	1.08559	1.1503	0.657089	1.05961	1.61258	0.654826	1.38845	1.15835	CAPSL				0.657089	1.05961	1.61258	0.654826	1.38845	1.15835	CAPSL
CAPZA3	0.787538	0.98007	2.09676	0.803553	2.1394	2.66243	0.737446	0.93689	2.25345	CAPZA3										CAPZA3
CARD10	0.789182	1.09348	0.909272	0.721718	0.831543	1.15217	0.728949	1.35858	0.905643	CARD10	0.789182	1.09348	0.909272	0.721718	0.831543	1.15217	0.728949	1.35858	0.905643	CARD10
CARD11	0.584232	1.18545	0.826098	0.492835	0.696864	1.41399	0.501379	1.93006	0.82012	CARD11										CARD11	0.584232	1.18545	0.826098
CARD14	0.894049	1.05094	0.860529	0.850718	0.818822	0.962507	0.858953	1.18082	0.85579	CARD14	0.894049	1.05094	0.860529	0.850718	0.818822	0.962507	0.858953	1.18082	0.85579	CARD14
CARD6	0.877851	1.04845	0.914244	0.837288	0.871999	1.04146	0.845198	1.18511	0.909656	CARD6	0.877851	1.04845	0.914244	0.837288	0.871999	1.04146	0.845198	1.18511	0.909656	CARD6
CARD9	1.1252	0.947644	1.03228	1.18737	1.08932	0.91742	1.18128	0.851481	1.03374	CARD9				1.18737	1.08932	0.91742	1.18128	0.851481	1.03374	CARD9
CARD9_ENST00000371734	1.28726	0.87941	1.05441	1.46378	1.199	0.819113	1.44721	0.699622	1.0569	CARD9_ENST00000371734										CARD9_ENST00000371734				1.46378	1.199	0.819113
CARM1	0.969796	1.02572	0.739849	0.945474	0.721295	0.762892	0.958639	1.08689	0.732818	CARM1	0.969796	1.02572	0.739849	0.945474	0.721295	0.762892	0.958639	1.08689	0.732818	CARM1
CARS	1.24227	0.917204	0.820882	1.35441	0.894983	0.660791	1.36341	0.776872	0.813858	CARS										CARS
CARS2	1.08424	1.01863	0.164154	1.06441	0.161152	0.1514	1.11927	1.06195	0.158268	CARS2							1.11927	1.06195	0.158268	CARS2
CASC1	0.952274	0.983728	1.36888	0.968026	1.39152	1.43748	0.939356	0.945	1.40219	CASC1	0.952274	0.983728	1.36888	0.968026	1.39152	1.43748	0.939356	0.945	1.40219	CASC1
CASC1_ENST00000354189	1.06708	0.925448	1.58746	1.15304	1.71535	1.48767	1.08864	0.783653	1.65372	CASC1_ENST00000354189				1.15304	1.71535	1.48767	1.08864	0.783653	1.65372	CASC1_ENST00000354189
CASC3	0.922776	0.982885	1.75138	0.938845	1.78188	1.89794	0.897271	0.947197	1.81306	CASC3				0.938845	1.78188	1.89794	0.897271	0.947197	1.81306	CASC3
CASD1	0.638687	1.17631	0.398288	0.542959	0.338591	0.623604	0.571242	1.98072	0.384455	CASD1										CASD1
CASK	0.848322	0.971	2.22688	0.873658	2.29339	2.62505	0.807732	0.90842	2.37167	CASK										CASK
CASKIN1	0.911116	1.03425	1.09515	0.880942	1.05888	1.20198	0.879031	1.11654	1.09796	CASKIN1	0.911116	1.03425	1.09515	0.880942	1.05888	1.20198	0.879031	1.11654	1.09796	CASKIN1
CASKIN2	0.746297	1.1411	0.312815	0.654018	0.274136	0.419156	0.675136	1.61729	0.306207	CASKIN2				0.654018	0.274136	0.419156	0.675136	1.61729	0.306207	CASKIN2
CASP2	0.841411	1.10585	0.236442	0.760875	0.213811	0.281007	0.794994	1.44879	0.22917	CASP2							0.794994	1.44879	0.22917	CASP2
CASP5	0.770573	1.10567	0.670838	0.696931	0.606727	0.87057	0.712244	1.45996	0.661694	CASP5				0.696931	0.606727	0.87057	0.712244	1.45996	0.661694	CASP5
CASP8AP2	0.84674	1.0116	1.42805	0.83703	1.41167	1.68652	0.813502	1.04506	1.46487	CASP8AP2	0.84674	1.0116	1.42805	0.83703	1.41167	1.68652	0.813502	1.04506	1.46487	CASP8AP2
CASQ1	1.10783	0.983409	0.679898	1.12652	0.691368	0.613719	1.15265	0.949768	0.667704	CASQ1	1.10783	0.983409	0.679898	1.12652	0.691368	0.613719	1.15265	0.949768	0.667704	CASQ1
CASQ2	0.840602	1.11088	0.301587	0.756701	0.271485	0.358775	0.799904	1.50321	0.289545	CASQ2				0.756701	0.271485	0.358775	0.799904	1.50321	0.289545	CASQ2
CASR	0.997209	1.00611	0.918648	0.991155	0.913071	0.921219	0.996095	1.01892	0.915487	CASR	0.997209	1.00611	0.918648	0.991155	0.913071	0.921219	0.996095	1.01892	0.915487	CASR
CASS4	0.943218	1.03737	0.736576	0.909238	0.71004	0.780918	0.924291	1.13328	0.728315	CASS4	0.943218	1.03737	0.736576	0.909238	0.71004	0.780918	0.924291	1.13328	0.728315	CASS4
CAST	0.672381	1.1172	0.952135	0.601844	0.85225	1.41606	0.607577	1.55543	0.949834	CAST										CAST
CASZ1	1.08146	0.932371	1.81051	1.1599	1.94184	1.67414	1.11637	0.809046	1.85693	CASZ1							1.11637	0.809046	1.85693	CASZ1
CATSPER1	1.09817	0.988702	0.56571	1.11072	0.572175	0.515139	1.13936	0.964677	0.554898	CATSPER1	1.09817	0.988702	0.56571	1.11072	0.572175	0.515139	1.13936	0.964677	0.554898	CATSPER1
CATSPER2	0.969451	1.0525	0.489674	0.921093	0.465249	0.505105	0.958904	1.18539	0.475756	CATSPER2	0.969451	1.0525	0.489674	0.921093	0.465249	0.505105	0.958904	1.18539	0.475756	CATSPER2
CATSPER3	1.21054	0.91649	0.929088	1.32085	1.01375	0.767496	1.31992	0.77794	0.926578	CATSPER3										CATSPER3
CATSPER4	1.02765	1.01607	0.611392	1.0114	0.601722	0.594941	1.03959	1.04857	0.599616	CATSPER4	1.02765	1.01607	0.611392	1.0114	0.601722	0.594941	1.03959	1.04857	0.599616	CATSPER4
CATSPERB	0.816588	1.06476	0.939208	0.766919	0.882081	1.15016	0.773106	1.26938	0.93609	CATSPERB	0.816588	1.06476	0.939208	0.766919	0.882081	1.15016	0.773106	1.26938	0.93609	CATSPERB
CATSPERG	0.858127	1.04249	1.24785	0.823155	1.19699	1.45415	0.812807	1.14162	1.26308	CATSPERG	0.858127	1.04249	1.24785	0.823155	1.19699	1.45415	0.812807	1.14162	1.26308	CATSPERG
CBFA2T2	0.786144	1.10426	0.604763	0.711916	0.547662	0.769278	0.731355	1.45281	0.594081	CBFA2T2				0.711916	0.547662	0.769278	0.731355	1.45281	0.594081	CBFA2T2
CBFA2T2_ENST00000342704	0.808053	1.09265	0.652193	0.739534	0.596891	0.807117	0.756756	1.38913	0.642464	CBFA2T2_ENST00000342704	0.808053	1.09265	0.652193	0.739534	0.596891	0.807117	0.756756	1.38913	0.642464	CBFA2T2_ENST00000342704
CBFA2T3	0.794256	1.06027	1.50263	0.74911	1.41722	1.89187	0.736052	1.226	1.52695	CBFA2T3	0.794256	1.06027	1.50263	0.74911	1.41722	1.89187	0.736052	1.226	1.52695	CBFA2T3
CBL	0.515093	1.13785	1.7212	0.45269	1.51268	3.34154	0.440166	1.67393	1.77608	CBL										CBL
CBLB	0.779618	1.06581	1.17415	0.731478	1.10165	1.50606	0.72724	1.27111	1.18346	CBLB	0.779618	1.06581	1.17415	0.731478	1.10165	1.50606	0.72724	1.27111	1.18346	CBLB
CBLC	1.09265	0.954321	1.10724	1.14495	1.16024	1.01335	1.13429	0.871901	1.11247	CBLC	1.09265	0.954321	1.10724	1.14495	1.16024	1.01335	1.13429	0.871901	1.11247	CBLC
CBLL1	0.733954	1.05972	1.503	0.692592	1.4183	2.04781	0.676571	1.24684	1.53769	CBLL1	0.733954	1.05972	1.503	0.692592	1.4183	2.04781	0.676571	1.24684	1.53769	CBLL1
CBLN2	0.925163	1.03121	0.985433	0.897165	0.955612	1.06515	0.898554	1.10878	0.985066	CBLN2	0.925163	1.03121	0.985433	0.897165	0.955612	1.06515	0.898554	1.10878	0.985066	CBLN2
CBLN4	1.23678	0.926097	0.315685	1.33547	0.340877	0.255248	1.3752	0.80482	0.308976	CBLN4										CBLN4
CBS	1.11562	0.980118	0.426103	1.13825	0.434746	0.381943	1.16974	0.940354	0.417663	CBS	1.11562	0.980118	0.426103	1.13825	0.434746	0.381943	1.16974	0.940354	0.417663	CBS
CBX2	1.18203	0.913543	1.32722	1.2939	1.45282	1.12282	1.2718	0.764403	1.33968	CBX2										CBX2
CBX4	1.21642	0.933169	0.577348	1.30354	0.618696	0.47463	1.32671	0.812635	0.569115	CBX4										CBX4
CBX8	0.786925	1.09	0.963112	0.72195	0.883589	1.22389	0.726828	1.34615	0.961575	CBX8	0.786925	1.09	0.963112	0.72195	0.883589	1.22389	0.726828	1.34615	0.961575	CBX8
CC2D1A	0.987585	1.03572	0.436479	0.953529	0.421427	0.441966	0.982619	1.11843	0.42739	CC2D1A	0.987585	1.03572	0.436479	0.953529	0.421427	0.441966	0.982619	1.11843	0.42739	CC2D1A
CC2D1B	0.825231	1.08093	0.904221	0.763442	0.836518	1.09572	0.771968	1.29179	0.899835	CC2D1B	0.825231	1.08093	0.904221	0.763442	0.836518	1.09572	0.771968	1.29179	0.899835	CC2D1B
CC2D2A	0.844301	1.03894	1.21263	0.812657	1.16718	1.43625	0.803011	1.14154	1.22753	CC2D2A	0.844301	1.03894	1.21263	0.812657	1.16718	1.43625	0.803011	1.14154	1.22753	CC2D2A
CCAR1	0.554741	1.05448	1.88785	0.526078	1.79031	3.40312	0.492405	1.21794	2.01724	CCAR1										CCAR1
CCBE1	0.830544	1.05811	1.18881	0.784928	1.12352	1.43137	0.779341	1.20625	1.19869	CCBE1	0.830544	1.05811	1.18881	0.784928	1.12352	1.43137	0.779341	1.20625	1.19869	CCBE1
CCDC102A	1.05177	0.976732	1.05055	1.07683	1.07557	0.998834	1.07262	0.928786	1.05263	CCDC102A	1.05177	0.976732	1.05055	1.07683	1.07557	0.998834	1.07262	0.928786	1.05263	CCDC102A
CCDC102B	0.890735	1.00366	1.30203	0.887489	1.29729	1.46175	0.862719	1.01215	1.33445	CCDC102B	0.890735	1.00366	1.30203	0.887489	1.29729	1.46175	0.862719	1.01215	1.33445	CCDC102B
CCDC102B_ENST00000584156	0.809665	1.00117	1.57287	0.808718	1.57103	1.94261	0.766407	1.00387	1.64898	CCDC102B_ENST00000584156	0.809665	1.00117	1.57287	0.808718	1.57103	1.94261	0.766407	1.00387	1.64898	CCDC102B_ENST00000584156
CCDC105	0.720881	1.07852	1.56902	0.668397	1.45479	2.17653	0.651569	1.29806	1.60826	CCDC105	0.720881	1.07852	1.56902	0.668397	1.45479	2.17653	0.651569	1.29806	1.60826	CCDC105
CCDC110	1.00131	1.03822	0.604864	0.964446	0.582595	0.604073	1.00165	1.15289	0.587247	CCDC110	1.00131	1.03822	0.604864	0.964446	0.582595	0.604073	1.00165	1.15289	0.587247	CCDC110
CCDC114	1.2695	0.907952	0.653343	1.39821	0.719579	0.514645	1.41597	0.753382	0.645862	CCDC114										CCDC114
CCDC120	0.640193	1.13468	1.43711	0.564204	1.26653	2.2448	0.557669	1.58218	1.4576	CCDC120										CCDC120
CCDC13	1.03666	0.976901	1.12309	1.06117	1.14964	1.08337	1.05115	0.9311	1.12984	CCDC13	1.03666	0.976901	1.12309	1.06117	1.14964	1.08337	1.05115	0.9311	1.12984	CCDC13
CCDC136	0.927281	1.06164	0.579304	0.873443	0.54567	0.624734	0.905586	1.23363	0.564478	CCDC136	0.927281	1.06164	0.579304	0.873443	0.54567	0.624734	0.905586	1.23363	0.564478	CCDC136
CCDC138	0.898855	1.0176	1.20336	0.88331	1.18255	1.33877	0.872291	1.0647	1.21727	CCDC138	0.898855	1.0176	1.20336	0.88331	1.18255	1.33877	0.872291	1.0647	1.21727	CCDC138
CCDC14	1.02165	0.900446	2.16304	1.1346	2.40219	2.11722	1.02838	0.723241	2.32511	CCDC14										CCDC14
CCDC14_ENST00000433542	0.970865	0.934685	1.94115	1.03871	2.0768	1.99941	0.962377	0.805243	2.05719	CCDC14_ENST00000433542										CCDC14_ENST00000433542
CCDC141	1.00605	1.02191	0.770868	0.984474	0.754338	0.766234	1.00783	1.07719	0.757207	CCDC141	1.00605	1.02191	0.770868	0.984474	0.754338	0.766234	1.00783	1.07719	0.757207	CCDC141
CCDC144A	0.943892	1.00134	1.16741	0.942627	1.16584	1.2368	0.929218	1.00468	1.18182	CCDC144A	0.943892	1.00134	1.16741	0.942627	1.16584	1.2368	0.929218	1.00468	1.18182	CCDC144A
CCDC144A_ENST00000456009	1.00443	0.966266	1.36011	1.0395	1.40759	1.3541	1.00568	0.890124	1.39473	CCDC144A_ENST00000456009	1.00443	0.966266	1.36011	1.0395	1.40759	1.3541	1.00568	0.890124	1.39473	CCDC144A_ENST00000456009
CCDC146	0.819982	1.03712	1.2612	0.790636	1.21607	1.53809	0.776075	1.13284	1.28495	CCDC146	0.819982	1.03712	1.2612	0.790636	1.21607	1.53809	0.776075	1.13284	1.28495	CCDC146
CCDC148	0.617627	1.13478	0.861482	0.544271	0.759162	1.39483	0.557253	1.66955	0.851863	CCDC148										CCDC148
CCDC15	0.709216	1.13557	0.594621	0.624545	0.523631	0.83842	0.651059	1.65955	0.578218	CCDC15							0.651059	1.65955	0.578218	CCDC15
CCDC150	0.810456	1.05557	1.09314	0.767788	1.03559	1.34879	0.765389	1.20928	1.10052	CCDC150	0.810456	1.05557	1.09314	0.767788	1.03559	1.34879	0.765389	1.20928	1.10052	CCDC150
CCDC151	1.05036	0.983445	0.928795	1.06804	0.94443	0.884262	1.07167	0.950997	0.925786	CCDC151	1.05036	0.983445	0.928795	1.06804	0.94443	0.884262	1.07167	0.950997	0.925786	CCDC151
CCDC155	0.839885	1.08961	0.636165	0.770816	0.583849	0.757443	0.791548	1.34349	0.625304	CCDC155	0.839885	1.08961	0.636165	0.770816	0.583849	0.757443	0.791548	1.34349	0.625304	CCDC155
CCDC157	0.703392	1.12148	0.990052	0.627199	0.882808	1.40754	0.631581	1.51195	0.989612	CCDC157										CCDC157
CCDC158	0.809093	1.0771	0.82189	0.751176	0.763057	1.01582	0.765457	1.32687	0.812548	CCDC158	0.809093	1.0771	0.82189	0.751176	0.763057	1.01582	0.765457	1.32687	0.812548	CCDC158
CCDC166	0.919458	1.01585	1.31615	0.905114	1.29561	1.43144	0.89116	1.05112	1.33279	CCDC166	0.919458	1.01585	1.31615	0.905114	1.29561	1.43144	0.89116	1.05112	1.33279	CCDC166
CCDC175	0.713197	1.03848	1.56175	0.686768	1.50387	2.18978	0.656377	1.13964	1.63134	CCDC175				0.686768	1.50387	2.18978	0.656377	1.13964	1.63134	CCDC175
CCDC18	0.839804	1.09651	0.735684	0.76589	0.670933	0.876018	0.80672	1.36939	0.709514	CCDC18	0.839804	1.09651	0.735684	0.76589	0.670933	0.876018	0.80672	1.36939	0.709514	CCDC18
CCDC27	1.18843	0.962924	0.611909	1.23419	0.63547	0.514889	1.27246	0.892779	0.596837	CCDC27										CCDC27
CCDC28A	0.963518	0.959332	1.75651	1.00436	1.83097	1.82301	0.952435	0.873065	1.82894	CCDC28A				1.00436	1.83097	1.82301	0.952435	0.873065	1.82894	CCDC28A
CCDC30	0.653625	1.1635	0.693616	0.561776	0.596147	1.06118	0.596373	1.74365	0.667691	CCDC30										CCDC30
CCDC33	0.994385	1.01998	0.728982	0.974904	0.714701	0.733099	0.992146	1.06309	0.720117	CCDC33	0.994385	1.01998	0.728982	0.974904	0.714701	0.733099	0.992146	1.06309	0.720117	CCDC33
CCDC38	0.888283	1.04114	0.952699	0.853183	0.915054	1.07252	0.859413	1.15359	0.949546	CCDC38	0.888283	1.04114	0.952699	0.853183	0.915054	1.07252	0.859413	1.15359	0.949546	CCDC38
CCDC39	0.956237	1.00064	1.13346	0.955629	1.13274	1.18533	0.944596	1.00221	1.14472	CCDC39	0.956237	1.00064	1.13346	0.955629	1.13274	1.18533	0.944596	1.00221	1.14472	CCDC39
CCDC40	0.961085	1.05959	0.345751	0.907037	0.326307	0.35975	0.947223	1.21397	0.335232	CCDC40				0.907037	0.326307	0.35975	0.947223	1.21397	0.335232	CCDC40
CCDC40_ENST00000269318	0.979053	1.04063	0.521657	0.94083	0.501291	0.532818	0.971687	1.14277	0.509698	CCDC40_ENST00000269318	0.979053	1.04063	0.521657	0.94083	0.501291	0.532818	0.971687	1.14277	0.509698	CCDC40_ENST00000269318
CCDC40_ENST00000374877	0.942412	1.06399	0.384902	0.88573	0.361751	0.408422	0.922762	1.2352	0.373839	CCDC40_ENST00000374877	0.942412	1.06399	0.384902	0.88573	0.361751	0.408422	0.922762	1.2352	0.373839	CCDC40_ENST00000374877
CCDC50	1.08605	0.939918	1.33411	1.15547	1.41939	1.22841	1.11594	0.825217	1.36553	CCDC50				1.15547	1.41939	1.22841	1.11594	0.825217	1.36553	CCDC50
CCDC54	1.10251	0.968135	0.972791	1.1388	1.00481	0.88234	1.13839	0.898781	0.97119	CCDC54	1.10251	0.968135	0.972791	1.1388	1.00481	0.88234	1.13839	0.898781	0.97119	CCDC54
CCDC57	0.707721	1.09774	1.24468	0.644705	1.13385	1.75872	0.638949	1.38833	1.26064	CCDC57				0.644705	1.13385	1.75872				CCDC57
CCDC57_ENST00000389641	0.722175	1.08743	1.31747	0.66411	1.21154	1.82431	0.655114	1.34028	1.33863	CCDC57_ENST00000389641	0.722175	1.08743	1.31747	0.66411	1.21154	1.82431	0.655114	1.34028	1.33863	CCDC57_ENST00000389641
CCDC6	0.558611	1.07247	2.24261	0.520863	2.09106	4.01461	0.48422	1.27915	2.40468	CCDC6										CCDC6
CCDC60	0.967445	1.03269	0.693605	0.936822	0.67165	0.716945	0.955806	1.11122	0.683955	CCDC60	0.967445	1.03269	0.693605	0.936822	0.67165	0.716945	0.955806	1.11122	0.683955	CCDC60
CCDC61	0.629677	1.13901	1.22625	0.552828	1.0766	1.94744	0.550619	1.62554	1.23724	CCDC61										CCDC61
CCDC62	0.890099	1.06415	0.695381	0.836443	0.653463	0.78124	0.86086	1.25293	0.681535	CCDC62	0.890099	1.06415	0.695381	0.836443	0.653463	0.78124	0.86086	1.25293	0.681535	CCDC62
CCDC63	0.915347	1.06395	0.551054	0.860331	0.517934	0.602017	0.88516	1.22382	0.540553	CCDC63	0.915347	1.06395	0.551054	0.860331	0.517934	0.602017	0.88516	1.22382	0.540553	CCDC63
CCDC66	0.509865	1.00384	2.38088	0.507916	2.37178	4.66964	0.448598	1.0132	2.68295	CCDC66										CCDC66
CCDC68	0.600997	1.15143	0.755847	0.521955	0.656439	1.25765	0.536642	1.81775	0.743995	CCDC68										CCDC68
CCDC73	0.961212	1.01086	1.00178	0.950887	0.99102	1.04221	0.95167	1.04016	1.00192	CCDC73	0.961212	1.01086	1.00178	0.950887	0.99102	1.04221	0.95167	1.04016	1.00192	CCDC73
CCDC8	1.04518	1.00992	0.53959	1.03491	0.53429	0.516264	1.06333	1.03211	0.529006	CCDC8	1.04518	1.00992	0.53959	1.03491	0.53429	0.516264	1.06333	1.03211	0.529006	CCDC8
CCDC80	0.687203	1.11211	1.1594	0.617927	1.04252	1.68713	0.616381	1.47785	1.16779	CCDC80										CCDC80
CCDC81	0.822316	1.09676	0.616389	0.74977	0.56201	0.749577	0.775454	1.3974	0.602565	CCDC81	0.822316	1.09676	0.616389	0.74977	0.56201	0.749577	0.775454	1.3974	0.602565	CCDC81
CCDC82	0.869502	0.930809	2.13362	0.934135	2.29222	2.45384	0.842551	0.780566	2.32454	CCDC82										CCDC82
CCDC83	0.810194	1.04308	1.22394	0.776729	1.17339	1.51068	0.766053	1.1631	1.24222	CCDC83	0.810194	1.04308	1.22394	0.776729	1.17339	1.51068	0.766053	1.1631	1.24222	CCDC83
CCDC85A	1.08953	0.937829	1.48294	1.16176	1.58125	1.36108	1.12475	0.819532	1.51497	CCDC85A				1.16176	1.58125	1.36108	1.12475	0.819532	1.51497	CCDC85A
CCDC87	0.904638	1.01886	1.33981	0.88789	1.31501	1.48105	0.871755	1.0603	1.36013	CCDC87	0.904638	1.01886	1.33981	0.88789	1.31501	1.48105	0.871755	1.0603	1.36013	CCDC87
CCDC88A	0.768878	1.07591	0.958193	0.714632	0.89059	1.24622	0.721586	1.32217	0.95525	CCDC88A	0.768878	1.07591	0.958193	0.714632	0.89059	1.24622	0.721586	1.32217	0.95525	CCDC88A
CCDC88B	0.775307	1.08365	1.16112	0.715459	1.07149	1.49762	0.712251	1.30799	1.17004	CCDC88B	0.775307	1.08365	1.16112	0.715459	1.07149	1.49762	0.712251	1.30799	1.17004	CCDC88B
CCDC88B_ENST00000359902	0.693335	1.0799	1.61918	0.642037	1.49938	2.33535	0.621563	1.29898	1.67126	CCDC88B_ENST00000359902										CCDC88B_ENST00000359902
CCDC88C	1.06008	0.996761	0.640424	1.06353	0.642505	0.604128	1.08517	0.989891	0.630899	CCDC88C	1.06008	0.996761	0.640424	1.06353	0.642505	0.604128	1.08517	0.989891	0.630899	CCDC88C
CCDC9	0.657463	1.18259	0.183791	0.555952	0.155414	0.279546	0.585003	2.00027	0.177262	CCDC9										CCDC9	0.657463	1.18259	0.183791
CCDC93	0.850025	1.02222	1.40745	0.831547	1.37685	1.65577	0.808366	1.07479	1.44274	CCDC93	0.850025	1.02222	1.40745	0.831547	1.37685	1.65577	0.808366	1.07479	1.44274	CCDC93
CCDC96	0.914079	1.04544	0.829307	0.874344	0.793258	0.907261	0.886182	1.15984	0.82234	CCDC96	0.914079	1.04544	0.829307	0.874344	0.793258	0.907261	0.886182	1.15984	0.82234	CCDC96
CCHCR1	0.668207	1.12193	1.11598	0.595585	0.994696	1.67012	0.595816	1.5106	1.12335	CCHCR1										CCHCR1
CCIN	0.909378	1.06317	0.534854	0.855347	0.503075	0.588154	0.877581	1.22623	0.525613	CCIN	0.909378	1.06317	0.534854	0.855347	0.503075	0.588154	0.877581	1.22623	0.525613	CCIN
CCKAR	1.0389	0.999951	0.652728	1.03895	0.65276	0.628285	1.05545	0.999847	0.645299	CCKAR	1.0389	0.999951	0.652728	1.03895	0.65276	0.628285	1.05545	0.999847	0.645299	CCKAR
CCKBR	1.04365	0.983126	0.941546	1.06156	0.957706	0.902166	1.06359	0.950835	0.939759	CCKBR	1.04365	0.983126	0.941546	1.06156	0.957706	0.902166	1.06359	0.950835	0.939759	CCKBR
CCKBR_ENST00000525462	1.13921	0.938295	1.0025	1.21413	1.06843	0.879999	1.21003	0.834166	1.00259	CCKBR_ENST00000525462										CCKBR_ENST00000525462
CCM2	1.02438	0.997046	0.85338	1.02741	0.855909	0.833074	1.03406	0.990528	0.849231	CCM2	1.02438	0.997046	0.85338	1.02741	0.855909	0.833074	1.03406	0.990528	0.849231	CCM2
CCNA1	0.884804	1.06737	0.672113	0.828954	0.629689	0.759618	0.849997	1.25406	0.660872	CCNA1	0.884804	1.06737	0.672113	0.828954	0.629689	0.759618	0.849997	1.25406	0.660872	CCNA1
CCNB3	0.827279	1.11773	0.217487	0.740143	0.19458	0.262895	0.778083	1.50893	0.209872	CCNB3							0.778083	1.50893	0.209872	CCNB3
CCND1	0.480376	1.16711	1.80246	0.411595	1.54437	3.75217	0.400434	1.83555	1.85977	CCND1										CCND1	0.480376	1.16711	1.80246
CCND2	0.494107	1.21911	0.933714	0.405302	0.765899	1.8897	0.411109	2.20915	0.930932	CCND2										CCND2	0.494107	1.21911	0.933714
CCNE1	0.440183	1.1968	1.00025	0.3678	0.835773	2.27236	0.371913	2.23448	1.00027	CCNE1										CCNE1	0.440183	1.1968	1.00025	0.3678	0.835773	2.27236
CCNF	1.18098	0.949135	0.628492	1.24427	0.662173	0.532179	1.26868	0.855634	0.618611	CCNF										CCNF
CCNL1	0.731187	1.05131	1.67611	0.6955	1.5943	2.29231	0.671099	1.19764	1.73245	CCNL1	0.731187	1.05131	1.67611	0.6955	1.5943	2.29231	0.671099	1.19764	1.73245	CCNL1
CCNL2	0.810178	1.06134	1.34082	0.763357	1.26333	1.65497	0.753232	1.21928	1.35836	CCNL2	0.810178	1.06134	1.34082	0.763357	1.26333	1.65497	0.753232	1.21928	1.35836	CCNL2
CCNT1	0.763677	1.0776	1.06611	0.708684	0.989343	1.39603	0.709141	1.32865	1.06949	CCNT1	0.763677	1.0776	1.06611	0.708684	0.989343	1.39603	0.709141	1.32865	1.06949	CCNT1
CCNT2	1.04607	0.959979	1.36554	1.08968	1.42246	1.3054	1.06091	0.871283	1.39188	CCNT2	1.04607	0.959979	1.36554	1.08968	1.42246	1.3054	1.06091	0.871283	1.39188	CCNT2
CCP110	1.00386	1.02006	0.738829	0.984116	0.7243	0.735991	1.00493	1.07689	0.726957	CCP110	1.00386	1.02006	0.738829	0.984116	0.7243	0.735991	1.00493	1.07689	0.726957	CCP110
CCPG1	0.954521	0.981883	1.36408	0.972133	1.38925	1.42908	0.942869	0.937413	1.39813	CCPG1	0.954521	0.981883	1.36408	0.972133	1.38925	1.42908	0.942869	0.937413	1.39813	CCPG1
CCR2	1.18325	0.921285	1.00745	1.28435	1.09353	0.851429	1.27803	0.792192	1.00775	CCR2										CCR2
CCR2_ENST00000445132	1.08172	0.913922	1.88701	1.1836	2.06474	1.74446	1.11972	0.778656	1.95524	CCR2_ENST00000445132							1.11972	0.778656	1.95524	CCR2_ENST00000445132
CCR3	0.850406	1.07572	0.752344	0.790544	0.699384	0.884688	0.802261	1.28091	0.74571	CCR3	0.850406	1.07572	0.752344	0.790544	0.699384	0.884688	0.802261	1.28091	0.74571	CCR3
CCR5	1.02471	1.00215	0.81235	1.02252	0.810608	0.792758	1.03526	1.00639	0.805062	CCR5	1.02471	1.00215	0.81235	1.02252	0.810608	0.792758	1.03526	1.00639	0.805062	CCR5
CCR6	1.07902	0.954948	1.18157	1.12993	1.23731	1.09504	1.11396	0.874039	1.19135	CCR6	1.07902	0.954948	1.18157	1.12993	1.23731	1.09504	1.11396	0.874039	1.19135	CCR6
CCR9	0.940426	0.982528	1.71554	0.957149	1.74604	1.82421	0.918979	0.947583	1.76826	CCR9	0.940426	0.982528	1.71554	0.957149	1.74604	1.82421	0.918979	0.947583	1.76826	CCR9
CCSER2	0.630497	1.09749	1.21531	0.574489	1.10735	1.92754	0.570252	1.47416	1.23038	CCSER2										CCSER2
CCT3	0.70988	1.06675	1.78436	0.665462	1.67271	2.5136	0.640372	1.24822	1.84853	CCT3				0.665462	1.67271	2.5136	0.640372	1.24822	1.84853	CCT3
CCT5	0.863623	1.04958	0.979479	0.822825	0.933208	1.13415	0.825565	1.19479	0.978704	CCT5	0.863623	1.04958	0.979479	0.822825	0.933208	1.13415	0.825565	1.19479	0.978704	CCT5
CCT6A	0.734122	1.13107	0.252904	0.649051	0.223597	0.344499	0.674374	1.68031	0.245986	CCT6A				0.649051	0.223597	0.344499	0.674374	1.68031	0.245986	CCT6A
CCT6B	0.819408	1.05924	0.995356	0.773584	0.939692	1.21473	0.776067	1.25329	0.995161	CCT6B	0.819408	1.05924	0.995356	0.773584	0.939692	1.21473	0.776067	1.25329	0.995161	CCT6B
CCT8	1.11524	1.00754	0.229808	1.10689	0.228088	0.206062	1.15618	1.02775	0.222258	CCT8				1.10689	0.228088	0.206062	1.15618	1.02775	0.222258	CCT8
CCT8L2	0.987776	1.03266	0.511665	0.956539	0.495484	0.517997	0.983067	1.10968	0.50187	CCT8L2	0.987776	1.03266	0.511665	0.956539	0.495484	0.517997	0.983067	1.10968	0.50187	CCT8L2
CD101	0.919712	1.05097	0.745487	0.875109	0.709334	0.810566	0.894704	1.18257	0.734422	CD101	0.919712	1.05097	0.745487	0.875109	0.709334	0.810566	0.894704	1.18257	0.734422	CD101
CD109	0.788595	1.08591	0.801178	0.726203	0.737791	1.01596	0.739326	1.37315	0.792626	CD109	0.788595	1.08591	0.801178	0.726203	0.737791	1.01596	0.739326	1.37315	0.792626	CD109
CD163	1.02755	1.01645	0.67574	1.01091	0.664803	0.657626	1.0364	1.05853	0.662989	CD163	1.02755	1.01645	0.67574	1.01091	0.664803	0.657626	1.0364	1.05853	0.662989	CD163
CD163_ENST00000396620	1.0483	1.00905	0.676693	1.03889	0.670622	0.645515	1.06428	1.03166	0.664138	CD163_ENST00000396620	1.0483	1.00905	0.676693	1.03889	0.670622	0.645515	1.06428	1.03166	0.664138	CD163_ENST00000396620
CD163L1	0.973066	0.99383	1.20839	0.979107	1.21589	1.24184	0.964939	0.979045	1.22231	CD163L1	0.973066	0.99383	1.20839	0.979107	1.21589	1.24184	0.964939	0.979045	1.22231	CD163L1
CD180	0.875526	1.03552	1.19674	0.845491	1.15569	1.36688	0.838083	1.12631	1.20709	CD180	0.875526	1.03552	1.19674	0.845491	1.15569	1.36688	0.838083	1.12631	1.20709	CD180
CD19	0.757885	1.09667	0.969696	0.691079	0.884219	1.27948	0.695559	1.39603	0.968454	CD19	0.757885	1.09667	0.969696	0.691079	0.884219	1.27948	0.695559	1.39603	0.968454	CD19
CD1A	0.992707	1.0259	0.700759	0.967645	0.683067	0.705907	0.990094	1.08616	0.689323	CD1A	0.992707	1.0259	0.700759	0.967645	0.683067	0.705907	0.990094	1.08616	0.689323	CD1A
CD1B	0.847212	1.07005	0.913261	0.791747	0.853473	1.07796	0.800809	1.24659	0.908586	CD1B	0.847212	1.07005	0.913261	0.791747	0.853473	1.07796	0.800809	1.24659	0.908586	CD1B
CD1C	0.827462	1.07194	0.943791	0.771931	0.880452	1.14058	0.778997	1.26455	0.940668	CD1C	0.827462	1.07194	0.943791	0.771931	0.880452	1.14058	0.778997	1.26455	0.940668	CD1C
CD1D	1.10671	0.972377	0.787481	1.13815	0.809852	0.71155	1.15414	0.920875	0.778298	CD1D	1.10671	0.972377	0.787481	1.13815	0.809852	0.71155	1.15414	0.920875	0.778298	CD1D
CD1E	0.793592	1.01784	1.81259	0.77968	1.78082	2.28403	0.73557	1.05573	1.9036	CD1E				0.77968	1.78082	2.28403	0.73557	1.05573	1.9036	CD1E
CD2	0.969431	0.990365	1.32929	0.978862	1.34222	1.3712	0.95933	0.968637	1.34987	CD2	0.969431	0.990365	1.32929	0.978862	1.34222	1.3712	0.95933	0.968637	1.34987	CD2
CD200R1L	0.974921	1.04791	0.421918	0.930346	0.402627	0.432772	0.966671	1.17923	0.41024	CD200R1L	0.974921	1.04791	0.421918	0.930346	0.402627	0.432772	0.966671	1.17923	0.41024	CD200R1L
CD209	0.958654	1.07708	0.346815	0.890046	0.321995	0.361773	0.943593	1.26769	0.332843	CD209				0.890046	0.321995	0.361773	0.943593	1.26769	0.332843	CD209
CD209_ENST00000601951	0.797664	1.14235	0.383135	0.698266	0.335392	0.480321	0.740516	1.58329	0.36809	CD209_ENST00000601951				0.698266	0.335392	0.480321	0.740516	1.58329	0.36809	CD209_ENST00000601951
CD22	1.11972	0.942716	1.14307	1.18776	1.21253	1.02085	1.17068	0.839141	1.15181	CD22							1.17068	0.839141	1.15181	CD22
CD226	0.797036	1.06092	1.15084	0.751269	1.08476	1.4439	0.746921	1.23665	1.16037	CD226	0.797036	1.06092	1.15084	0.751269	1.08476	1.4439	0.746921	1.23665	1.16037	CD226
CD248	1.04238	0.985075	0.95996	1.05817	0.974505	0.920932	1.05958	0.954041	0.958462	CD248	1.04238	0.985075	0.95996	1.05817	0.974505	0.920932	1.05958	0.954041	0.958462	CD248
CD276	0.660543	1.15045	0.861958	0.57416	0.749235	1.30492	0.580844	1.68916	0.857957	CD276										CD276
CD2AP	1.06371	0.971178	1.09925	1.09528	1.13188	1.03341	1.08556	0.90764	1.10522	CD2AP	1.06371	0.971178	1.09925	1.09528	1.13188	1.03341	1.08556	0.90764	1.10522	CD2AP
CD300LB	0.637932	1.16038	0.758944	0.549759	0.654046	1.18969	0.563773	1.76373	0.7489	CD300LB										CD300LB
CD300LG	0.698527	1.11254	1.23099	0.627867	1.10647	1.76227	0.623969	1.45016	1.24359	CD300LG										CD300LG
CD33	0.946268	1.06167	0.303554	0.891298	0.28592	0.32079	0.927201	1.22524	0.295163	CD33				0.891298	0.28592	0.32079	0.927201	1.22524	0.295163	CD33
CD36	0.98066	1.04646	0.460306	0.937123	0.43987	0.469384	0.974414	1.17353	0.447249	CD36	0.98066	1.04646	0.460306	0.937123	0.43987	0.469384	0.974414	1.17353	0.447249	CD36
CD36_ENST00000433696	1.01567	1.03255	0.482259	0.983659	0.467058	0.474817	1.02107	1.11583	0.469096	CD36_ENST00000433696	1.01567	1.03255	0.482259	0.983659	0.467058	0.474817	1.02107	1.11583	0.469096	CD36_ENST00000433696
CD36_ENST00000447544	0.995497	1.04964	0.34489	0.948413	0.328578	0.34645	0.994013	1.18699	0.333086	CD36_ENST00000447544				0.948413	0.328578	0.34645	0.994013	1.18699	0.333086	CD36_ENST00000447544
CD4	1.16428	0.985364	0.187633	1.18158	0.19042	0.161157	1.24437	0.956457	0.180748	CD4										CD4
CD44	1.14125	0.952299	0.988837	1.19842	1.03837	0.866451	1.19558	0.852809	0.988295	CD44										CD44
CD5	1.06926	0.972045	0.999566	1.10001	1.02831	0.934818	1.09805	0.917646	0.999545	CD5	1.06926	0.972045	0.999566	1.10001	1.02831	0.934818	1.09805	0.917646	0.999545	CD5
CD5L	0.827052	1.07797	0.855069	0.767231	0.793221	1.03387	0.780867	1.2947	0.846826	CD5L	0.827052	1.07797	0.855069	0.767231	0.793221	1.03387	0.780867	1.2947	0.846826	CD5L
CD6	1.12819	0.977614	0.53167	1.15402	0.543844	0.47126	1.18427	0.931349	0.521262	CD6				1.15402	0.543844	0.47126	1.18427	0.931349	0.521262	CD6
CD84	0.89836	1.07822	0.524757	0.833187	0.486688	0.584128	0.865734	1.28861	0.511048	CD84	0.89836	1.07822	0.524757	0.833187	0.486688	0.584128	0.865734	1.28861	0.511048	CD84
CD86	0.825542	0.999984	1.845	0.825555	1.84503	2.2349	0.782343	0.999945	1.93021	CD86				0.825555	1.84503	2.2349	0.782343	0.999945	1.93021	CD86
CD93	1.2387	0.881496	1.45059	1.40522	1.6456	1.17106	1.36237	0.698074	1.4749	CD93										CD93
CD96	0.854555	1.09525	0.39781	0.780241	0.363215	0.465517	0.817211	1.4218	0.384575	CD96	0.854555	1.09525	0.39781	0.780241	0.363215	0.465517	0.817211	1.4218	0.384575	CD96
CDAN1	0.813837	1.11114	0.373247	0.732435	0.335914	0.458627	0.757988	1.45484	0.364622	CDAN1				0.732435	0.335914	0.458627	0.757988	1.45484	0.364622	CDAN1
CDC14A	0.906829	0.999802	1.54153	0.907009	1.54183	1.69991	0.877767	0.999356	1.58224	CDC14A	0.906829	0.999802	1.54153	0.907009	1.54183	1.69991	0.877767	0.999356	1.58224	CDC14A
CDC16	0.598873	1.14921	0.802762	0.521115	0.698531	1.34045	0.532708	1.80292	0.793631	CDC16										CDC16
CDC20B	0.696036	1.07448	1.43751	0.647791	1.33787	2.06529	0.633052	1.30242	1.4728	CDC20B				0.647791	1.33787	2.06529				CDC20B
CDC20B_ENST00000322374	0.692523	1.0888	1.26132	0.636042	1.15845	1.82134	0.629219	1.37664	1.2795	CDC20B_ENST00000322374										CDC20B_ENST00000322374
CDC23	0.605492	1.20992	0.168692	0.50044	0.139424	0.278603	0.532285	2.27056	0.1614	CDC23										CDC23	0.605492	1.20992	0.168692
CDC25B	0.57294	1.15962	1.1709	0.494075	1.00973	2.04367	0.493855	1.81726	1.17785	CDC25B										CDC25B
CDC27	0.992279	1.02975	0.69232	0.96361	0.672317	0.697707	0.98996	1.10854	0.678445	CDC27	0.992279	1.02975	0.69232	0.96361	0.672317	0.697707	0.98996	1.10854	0.678445	CDC27
CDC37	0.918544	1.07292	0.371549	0.856113	0.346295	0.404497	0.893264	1.28667	0.360326	CDC37				0.856113	0.346295	0.404497	0.893264	1.28667	0.360326	CDC37
CDC40	0.550657	1.13359	1.13238	0.485765	0.998934	2.05641	0.485803	1.70609	1.14129	CDC40										CDC40
CDC42BPA	0.770993	1.13681	0.496083	0.678205	0.43638	0.643434	0.722687	1.63302	0.474026	CDC42BPA				0.678205	0.43638	0.643434	0.722687	1.63302	0.474026	CDC42BPA
CDC42BPA_ENST00000334218	0.800571	1.11112	0.622613	0.720509	0.560348	0.777711	0.756503	1.47664	0.601851	CDC42BPA_ENST00000334218				0.720509	0.560348	0.777711	0.756503	1.47664	0.601851	CDC42BPA_ENST00000334218
CDC42BPA_ENST00000366766	0.780594	1.11843	0.576602	0.697937	0.515545	0.738671	0.73157	1.52742	0.558079	CDC42BPA_ENST00000366766				0.697937	0.515545	0.738671	0.73157	1.52742	0.558079	CDC42BPA_ENST00000366766
CDC42BPB	1.10542	0.93154	1.42151	1.18666	1.52598	1.28594	1.15001	0.809941	1.44984	CDC42BPB				1.18666	1.52598	1.28594	1.15001	0.809941	1.44984	CDC42BPB
CDC45	1.09099	0.976016	0.829108	1.1178	0.849482	0.759961	1.12688	0.924052	0.823295	CDC45	1.09099	0.976016	0.829108	1.1178	0.849482	0.759961	1.12688	0.924052	0.823295	CDC45
CDC5L	1.16642	0.899385	1.57547	1.2969	1.75171	1.35069	1.22734	0.720108	1.63343	CDC5L										CDC5L
CDCA2	0.84284	1.03588	1.21963	0.813647	1.17738	1.44704	0.804834	1.14202	1.23312	CDCA2	0.84284	1.03588	1.21963	0.813647	1.17738	1.44704	0.804834	1.14202	1.23312	CDCA2
CDCA7	0.649259	1.0762	1.66857	0.603287	1.55042	2.56996	0.583082	1.32005	1.7262	CDCA7										CDCA7
CDCP1	0.887089	1.05484	0.857103	0.840971	0.812544	0.966197	0.849007	1.19365	0.852536	CDCP1	0.887089	1.05484	0.857103	0.840971	0.812544	0.966197	0.849007	1.19365	0.852536	CDCP1
CDH10	0.834979	1.06153	0.943355	0.786577	0.888671	1.1298	0.791773	1.24685	0.940885	CDH10	0.834979	1.06153	0.943355	0.786577	0.888671	1.1298	0.791773	1.24685	0.940885	CDH10
CDH11	1.20927	0.945838	0.468711	1.27852	0.495551	0.387598	1.31221	0.843946	0.459328	CDH11										CDH11
CDH11_ENST00000394156	1.26997	0.925854	0.373482	1.37167	0.403392	0.294088	1.41257	0.793374	0.365106	CDH11_ENST00000394156										CDH11_ENST00000394156
CDH12	0.876778	1.04349	1.01691	0.840233	0.974527	1.15983	0.841525	1.16218	1.01772	CDH12	0.876778	1.04349	1.01691	0.840233	0.974527	1.15983	0.841525	1.16218	1.01772	CDH12
CDH13	0.846723	1.07079	0.797236	0.790748	0.744533	0.941555	0.800555	1.27304	0.791443	CDH13	0.846723	1.07079	0.797236	0.790748	0.744533	0.941555	0.800555	1.27304	0.791443	CDH13
CDH15	0.966262	1.00778	1.14017	0.958801	1.13137	1.17998	0.953371	1.02496	1.1453	CDH15	0.966262	1.00778	1.14017	0.958801	1.13137	1.17998	0.953371	1.02496	1.1453	CDH15
CDH16	0.92486	1.02162	1.17666	0.90529	1.15177	1.27226	0.898744	1.07238	1.18416	CDH16	0.92486	1.02162	1.17666	0.90529	1.15177	1.27226	0.898744	1.07238	1.18416	CDH16
CDH17	0.941818	1.00165	1.33546	0.940268	1.33326	1.41796	0.922901	1.00547	1.35527	CDH17	0.941818	1.00165	1.33546	0.940268	1.33326	1.41796	0.922901	1.00547	1.35527	CDH17
CDH18	0.900502	1.03797	0.956885	0.867563	0.921883	1.06261	0.871398	1.14238	0.955072	CDH18	0.900502	1.03797	0.956885	0.867563	0.921883	1.06261	0.871398	1.14238	0.955072	CDH18
CDH19	0.744994	1.07061	1.21815	0.695859	1.13781	1.63512	0.689511	1.29354	1.23253	CDH19	0.744994	1.07061	1.21815	0.695859	1.13781	1.63512	0.689511	1.29354	1.23253	CDH19
CDH2	0.924762	1.03616	0.863658	0.892491	0.833519	0.933924	0.901144	1.13108	0.858427	CDH2	0.924762	1.03616	0.863658	0.892491	0.833519	0.933924	0.901144	1.13108	0.858427	CDH2
CDH20	1.00629	0.983905	1.22838	1.02275	1.24847	1.2207	1.00863	0.949927	1.24055	CDH20	1.00629	0.983905	1.22838	1.02275	1.24847	1.2207	1.00863	0.949927	1.24055	CDH20
CDH22	1.10604	0.972529	0.607984	1.13728	0.625158	0.549694	1.1544	0.91687	0.601107	CDH22	1.10604	0.972529	0.607984	1.13728	0.625158	0.549694	1.1544	0.91687	0.601107	CDH22
CDH23	1.03441	1.00519	0.529023	1.02906	0.526292	0.511427	1.04961	1.01612	0.521664	CDH23	1.03441	1.00519	0.529023	1.02906	0.526292	0.511427	1.04961	1.01612	0.521664	CDH23
CDH23_ENST00000299366	1.10677	0.98188	0.262406	1.1272	0.267248	0.237091	1.15906	0.946015	0.257266	CDH23_ENST00000299366				1.1272	0.267248	0.237091	1.15906	0.946015	0.257266	CDH23_ENST00000299366
CDH23_ENST00000398809	1.06236	1.00533	0.240644	1.05673	0.239368	0.226519	1.09099	1.01657	0.235296	CDH23_ENST00000398809				1.05673	0.239368	0.226519	1.09099	1.01657	0.235296	CDH23_ENST00000398809
CDH23_ENST00000442677	1.11704	0.984227	0.182575	1.13495	0.185501	0.163445	1.17418	0.952682	0.178227	CDH23_ENST00000442677							1.17418	0.952682	0.178227	CDH23_ENST00000442677
CDH23_ENST00000461841	1.04802	1.00957	0.268629	1.03809	0.266082	0.25632	1.0699	1.02986	0.263003	CDH23_ENST00000461841				1.03809	0.266082	0.25632	1.0699	1.02986	0.263003	CDH23_ENST00000461841
CDH24	0.888507	0.99513	2.00442	0.892855	2.01423	2.25594	0.850808	0.984903	2.07989	CDH24										CDH24
CDH26	1.17406	0.889538	1.69959	1.31986	1.91064	1.44761	1.25111	0.711267	1.75693	CDH26										CDH26
CDH3	1.11658	0.941529	1.2055	1.18592	1.28037	1.07964	1.17038	0.836089	1.21428	CDH3				1.18592	1.28037	1.07964	1.17038	0.836089	1.21428	CDH3
CDH3_ENST00000429102	1.05821	0.946874	1.57934	1.11758	1.66795	1.49246	1.08315	0.849861	1.61231	CDH3_ENST00000429102				1.11758	1.66795	1.49246	1.08315	0.849861	1.61231	CDH3_ENST00000429102
CDH4	1.03243	1.01383	0.417175	1.01835	0.411484	0.404071	1.04613	1.04456	0.409253	CDH4	1.03243	1.01383	0.417175	1.01835	0.411484	0.404071	1.04613	1.04456	0.409253	CDH4
CDH5	0.919238	1.01559	1.3397	0.905127	1.31913	1.4574	0.890666	1.05027	1.35712	CDH5	0.919238	1.01559	1.3397	0.905127	1.31913	1.4574	0.890666	1.05027	1.35712	CDH5
CDH6	0.968516	1.02535	0.803392	0.94457	0.783529	0.829508	0.957659	1.08631	0.795775	CDH6	0.968516	1.02535	0.803392	0.94457	0.783529	0.829508	0.957659	1.08631	0.795775	CDH6
CDH7	0.873334	1.06571	0.729726	0.819489	0.684735	0.835564	0.836233	1.25187	0.720119	CDH7	0.873334	1.06571	0.729726	0.819489	0.684735	0.835564	0.836233	1.25187	0.720119	CDH7
CDH7_ENST00000323011	0.870488	1.06643	0.73477	0.816266	0.689001	0.84409	0.832714	1.25513	0.725275	CDH7_ENST00000323011	0.870488	1.06643	0.73477	0.816266	0.689001	0.84409	0.832714	1.25513	0.725275	CDH7_ENST00000323011
CDH8	1.04358	0.978519	1.10131	1.06649	1.12548	1.05532	1.05907	0.930322	1.10619	CDH8	1.04358	0.978519	1.10131	1.06649	1.12548	1.05532	1.05907	0.930322	1.10619	CDH8
CDH9	0.85332	1.03662	1.1888	0.823175	1.1468	1.39314	0.816047	1.14274	1.19956	CDH9	0.85332	1.03662	1.1888	0.823175	1.1468	1.39314	0.816047	1.14274	1.19956	CDH9
CDHR1	1.0092	1.00903	0.69491	1.00017	0.688693	0.688576	1.01294	1.02919	0.688658	CDHR1	1.0092	1.00903	0.69491	1.00017	0.688693	0.688576	1.01294	1.02919	0.688658	CDHR1
CDHR1_ENST00000332904	1.01685	1.00747	0.676424	1.00931	0.671412	0.665217	1.02373	1.02401	0.669576	CDHR1_ENST00000332904	1.01685	1.00747	0.676424	1.00931	0.671412	0.665217	1.02373	1.02401	0.669576	CDHR1_ENST00000332904
CDHR2	0.937486	1.03637	0.796492	0.904584	0.768538	0.849604	0.914044	1.12206	0.79122	CDHR2	0.937486	1.03637	0.796492	0.904584	0.768538	0.849604	0.914044	1.12206	0.79122	CDHR2
CDHR3	1.14263	0.938286	1.08986	1.21778	1.16154	0.953816	1.20736	0.825912	1.09383	CDHR3										CDHR3
CDHR4	1.06049	1.00858	0.388609	1.05148	0.385305	0.366442	1.08606	1.02752	0.379618	CDHR4	1.06049	1.00858	0.388609	1.05148	0.385305	0.366442	1.08606	1.02752	0.379618	CDHR4
CDHR5	0.989157	0.990491	1.30392	0.998654	1.31644	1.31821	0.984858	0.97075	1.31696	CDHR5	0.989157	0.990491	1.30392	0.998654	1.31644	1.31821	0.984858	0.97075	1.31696	CDHR5
CDK11A	0.76846	1.15221	0.369084	0.666946	0.320328	0.48029	0.713092	1.69406	0.352032	CDK11A				0.666946	0.320328	0.48029	0.713092	1.69406	0.352032	CDK11A
CDK13	0.857965	1.02318	1.4866	0.838529	1.45292	1.7327	0.81623	1.0791	1.52095	CDK13	0.857965	1.02318	1.4866	0.838529	1.45292	1.7327	0.81623	1.0791	1.52095	CDK13
CDK14	0.924967	1.05986	0.48799	0.872725	0.460429	0.527576	0.900874	1.22684	0.477097	CDK14	0.924967	1.05986	0.48799	0.872725	0.460429	0.527576	0.900874	1.22684	0.477097	CDK14
CDK15	1.02439	0.928191	1.84169	1.10364	1.98417	1.79783	1.03346	0.802987	1.92846	CDK15							1.03346	0.802987	1.92846	CDK15
CDK17	0.683229	1.09259	1.24252	0.625332	1.13723	1.81859	0.619235	1.39349	1.25999	CDK17										CDK17
CDK17_ENST00000543119	0.697519	1.06165	1.58198	0.657012	1.49011	2.26801	0.634502	1.23839	1.63688	CDK17_ENST00000543119				0.657012	1.49011	2.26801				CDK17_ENST00000543119
CDK18	1.19743	0.953441	0.2198	1.2559	0.230533	0.18356	1.30408	0.870023	0.213934	CDK18										CDK18
CDK18_ENST00000429964	1.25114	0.93126	0.227159	1.34349	0.243926	0.181562	1.39554	0.815719	0.220976	CDK18_ENST00000429964										CDK18_ENST00000429964
CDK19	0.721396	1.10367	0.976382	0.653635	0.884671	1.35346	0.658852	1.44429	0.975139	CDK19				0.653635	0.884671	1.35346	0.658852	1.44429	0.975139	CDK19
CDK5RAP1	0.847401	1.04816	1.14536	0.808464	1.09274	1.35162	0.804617	1.18328	1.15202	CDK5RAP1	0.847401	1.04816	1.14536	0.808464	1.09274	1.35162	0.804617	1.18328	1.15202	CDK5RAP1
CDK5RAP2	0.815216	1.05931	1.11243	0.769575	1.05015	1.36459	0.766739	1.22052	1.11975	CDK5RAP2	0.815216	1.05931	1.11243	0.769575	1.05015	1.36459	0.766739	1.22052	1.11975	CDK5RAP2
CDK6	0.891361	1.04855	0.907336	0.85009	0.865326	1.01792	0.857053	1.17339	0.903475	CDK6	0.891361	1.04855	0.907336	0.85009	0.865326	1.01792	0.857053	1.17339	0.903475	CDK6
CDKAL1	0.631587	1.17399	0.359045	0.537983	0.305833	0.568481	0.564243	2.00732	0.347176	CDKAL1										CDKAL1
CDKL2	0.766306	1.05772	1.31006	0.72449	1.23857	1.70957	0.714098	1.23706	1.33015	CDKL2	0.766306	1.05772	1.31006	0.72449	1.23857	1.70957	0.714098	1.23706	1.33015	CDKL2
CDKL5	0.88189	1.04418	0.978543	0.844579	0.937142	1.1096	0.847988	1.16375	0.97749	CDKL5	0.88189	1.04418	0.978543	0.844579	0.937142	1.1096	0.847988	1.16375	0.97749	CDKL5
CDON	1.0012	1.00311	0.940846	0.998092	0.937928	0.939721	1.00161	1.0106	0.938402	CDON	1.0012	1.00311	0.940846	0.998092	0.937928	0.939721	1.00161	1.0106	0.938402	CDON
CDR1	0.884528	1.01254	1.33518	0.873576	1.31865	1.50948	0.852303	1.04221	1.36385	CDR1	0.884528	1.01254	1.33518	0.873576	1.31865	1.50948	0.852303	1.04221	1.36385	CDR1
CDS1	0.943722	1.09661	0	0.860583	0	0	0.92576	1.39931	0	CDS1										CDS1
CDX4	1.23489	0.919226	0.905256	1.34341	0.984802	0.733064	1.34451	0.772177	0.901681	CDX4										CDX4
CDYL	1.01	0.982256	1.26396	1.02825	1.28679	1.25144	1.01362	0.94322	1.27694	CDYL	1.01	0.982256	1.26396	1.02825	1.28679	1.25144	1.01362	0.94322	1.27694	CDYL
CDYL2	0.959389	1.00838	1.14194	0.951418	1.13245	1.19028	0.944506	1.02671	1.1487	CDYL2	0.959389	1.00838	1.14194	0.951418	1.13245	1.19028	0.944506	1.02671	1.1487	CDYL2
CEACAM1	1.12732	0.939303	1.14956	1.20017	1.22385	1.01973	1.18391	0.830915	1.15765	CEACAM1							1.18391	0.830915	1.15765	CEACAM1
CEACAM16	1.12191	0.949009	0.989328	1.18219	1.04249	0.881829	1.17965	0.857226	0.988933	CEACAM16	1.12191	0.949009	0.989328	1.18219	1.04249	0.881829	1.17965	0.857226	0.988933	CEACAM16
CEACAM18	1.18192	0.908465	1.41918	1.30101	1.56217	1.20074	1.26305	0.748866	1.44408	CEACAM18										CEACAM18
CEACAM20	0.836243	1.03308	1.53428	0.809467	1.48516	1.83474	0.788079	1.11415	1.5699	CEACAM20	0.836243	1.03308	1.53428	0.809467	1.48516	1.83474	0.788079	1.11415	1.5699	CEACAM20
CEACAM5	0.942905	1.03869	0.752761	0.907781	0.72472	0.798342	0.922589	1.13155	0.744674	CEACAM5	0.942905	1.03869	0.752761	0.907781	0.72472	0.798342	0.922589	1.13155	0.744674	CEACAM5
CEACAM6	0.732701	1.13485	0.651124	0.645637	0.573753	0.888662	0.663401	1.57312	0.640552	CEACAM6				0.645637	0.573753	0.888662	0.663401	1.57312	0.640552	CEACAM6
CEACAM7	0.742572	1.10332	1.00482	0.673035	0.910722	1.35316	0.677086	1.41041	1.00507	CEACAM7				0.673035	0.910722	1.35316	0.677086	1.41041	1.00507	CEACAM7
CEACAM8	1.04501	0.985646	0.948581	1.06023	0.962396	0.907721	1.0627	0.955805	0.946286	CEACAM8	1.04501	0.985646	0.948581	1.06023	0.962396	0.907721	1.0627	0.955805	0.946286	CEACAM8
CEBPZ	0.900756	1.01214	1.20726	0.889951	1.19278	1.34027	0.876143	1.04404	1.22453	CEBPZ	0.900756	1.01214	1.20726	0.889951	1.19278	1.34027	0.876143	1.04404	1.22453	CEBPZ
CECR2	0.942726	0.995579	1.37565	0.946913	1.38176	1.45922	0.924163	0.985759	1.40205	CECR2	0.942726	0.995579	1.37565	0.946913	1.38176	1.45922	0.924163	0.985759	1.40205	CECR2
CECR2_ENST00000262608	0.943879	0.987449	1.48784	0.955876	1.50675	1.5763	0.925651	0.960298	1.5251	CECR2_ENST00000262608	0.943879	0.987449	1.48784	0.955876	1.50675	1.5763	0.925651	0.960298	1.5251	CECR2_ENST00000262608
CEL	1.01227	1.01462	0.517085	0.997692	0.509636	0.510815	1.01728	1.04802	0.509983	CEL	1.01227	1.01462	0.517085	0.997692	0.509636	0.510815	1.01728	1.04802	0.509983	CEL
CELF1	0.733113	1.06544	1.57066	0.688085	1.47419	2.14245	0.669831	1.25332	1.61142	CELF1	0.733113	1.06544	1.57066	0.688085	1.47419	2.14245	0.669831	1.25332	1.61142	CELF1
CELF1_ENST00000395292	0.740754	1.06647	1.51739	0.694586	1.42282	2.04845	0.677906	1.25549	1.55339	CELF1_ENST00000395292	0.740754	1.06647	1.51739	0.694586	1.42282	2.04845	0.677906	1.25549	1.55339	CELF1_ENST00000395292
[truncated: 8,395 more rows]

## Sheet: Two-Sample t-Tests 1
Two sample t-Tests of passenger genes (PG) and known oncogenes (OG) or known tumor suppressor genes (TSG)
Parameters: observed/expected ratios rS*, rM*, rN*; rSM*, rNM*, rNS*; rSMN*, rMSN* and rNSM*
rS*, rM* and rN*parameters of PGs and OGs
		N	Mean	SD	SEM	Median
rS*_PG1SD		6018	0.92868	0.09853	0.00127	0.92959							Null Hypothesis: mean1-mean2 = 0
rS*_OG		71	0.36673	0.2211	0.02624	0.38419			t Statistic	DF	Prob>|t|		Alternative Hypothesis: mean1-mean2 <> 0
	Difference		0.56195		0.01203			Equal Variance Assumed	46.7044	6087	0		At 0.05 level, when equal variance is assumed, Mean1 - Mean2 is significantly different from 0
	Overall	6089	0.92212	0.11746	0.00151	0.92742		Equal Variance NOT Assumed (Welch Correction)	21.3908	70.3284	1.67374e-32		At 0.05 level, when equal variance is NOT assumed, Mean1 - Mean2 is significantly different from 0
		N	Mean	SD	SEM	Median
rM*_PG1SD		6018	1.02689	0.03669	0.000472982	1.02709							Null Hypothesis: mean1-mean2 = 0
rM*_OG		71	1.26042	0.1023	0.01214	1.25446			t Statistic	DF	Prob>|t|		Alternative Hypothesis: mean1-mean2 <> 0
	Difference		-0.23354		0.00455			Equal Variance Assumed	-51.3546	6087	0		At 0.05 level, when equal variance is assumed, Mean1 - Mean2 is significantly different from 0
	Overall	6089	1.02961	0.0456	0.000584403	1.02761		Equal Variance NOT Assumed (Welch Correction)	-19.2217	70.2127	1.10562e-29		At 0.05 level, when equal variance is NOT assumed, Mean1 - Mean2 is significantly different from 0
		N	Mean	SD	SEM	Median
rN*_PG1SD		6018	0.9882	0.31388	0.00405	0.9713							Null Hypothesis: mean1-mean2 = 0
rN*_OG		71	0.75514	0.5536	0.0657	0.64514			t Statistic	DF	Prob>|t|		Alternative Hypothesis: mean1-mean2 <> 0
	Difference		0.23306		0.03792			Equal Variance Assumed	6.1457	6087	8.46556e-10		At 0.05 level, when equal variance is assumed, Mean1 - Mean2 is significantly different from 0
	Overall	6089	0.98548	0.31862	0.00408	0.96919		Equal Variance NOT Assumed (Welch Correction)	3.54058	70.532	0.000711906		At 0.05 level, when equal variance is NOT assumed, Mean1 - Mean2 is significantly different from 0
rSM*, rNM* and rNS* parameters of PGs and OGs
		N	Mean	SD	SEM	Median
rSM*_PG1SD		7111	0.90418	0.13916	0.00165	0.89987							Null Hypothesis: mean1-mean2 = 0
rSM*_OG		71	0.30695	0.21137	0.02508	0.30615			t Statistic	DF	Prob>|t|		Alternative Hypothesis: mean1-mean2 <> 0
	Difference		0.59723		0.0167			Equal Variance Assumed	35.7565	7180	7.6352e-258		At 0.05 level, when equal variance is assumed, Mean1 - Mean2 is significantly different from 0
	Overall	7182	0.89828	0.15199	0.00179	0.89779		Equal Variance NOT Assumed (Welch Correction)	23.7573	70.6072	2.10572e-35		At 0.05 level, when equal variance is NOT assumed, Mean1 - Mean2 is significantly different from 0
		N	Mean	SD	SEM	Median
rNM*_PG1SD		7111	0.95067	0.37201	0.00441	0.92938							Null Hypothesis: mean1-mean2 = 0
rNM*_OG		71	0.62749	0.49724	0.05901	0.47035			t Statistic	DF	Prob>|t|		Alternative Hypothesis: mean1-mean2 <> 0
	Difference		0.32318		0.04454			Equal Variance Assumed	7.25621	7180	4.39827e-13		At 0.05 level, when equal variance is assumed, Mean1 - Mean2 is significantly different from 0
	Overall	7182	0.94748	0.37477	0.00442	0.92647		Equal Variance NOT Assumed (Welch Correction)	5.46137	70.7846	6.63151e-07		At 0.05 level, when equal variance is NOT assumed, Mean1 - Mean2 is significantly different from 0
		N	Mean	SD	SEM	Median
rNS*_PG1SD		7111	1.07765	0.45834	0.00544	1.02916							Null Hypothesis: mean1-mean2 = 0
rNS*_OG		71	2.36785	1.61075	0.19116	2.00936			t Statistic	DF	Prob>|t|		Alternative Hypothesis: mean1-mean2 <> 0
	Difference		-1.2902		0.05761			Equal Variance Assumed	-22.3949	7180	1.97163e-107		At 0.05 level, when equal variance is assumed, Mean1 - Mean2 is significantly different from 0
	Overall	7182	1.0904	0.49959	0.0059	1.03252		Equal Variance NOT Assumed (Welch Correction)	-6.74656	70.1132	3.58445e-09		At 0.05 level, when equal variance is NOT assumed, Mean1 - Mean2 is significantly different from 0
rSMN*, rMSN* and rNSM*parameters of PGs and OGs
		N	Mean	SD	SEM	Median
rSMN*_PG1SD		7330	0.90664	0.14049	0.00164	0.9026							Null Hypothesis: mean1-mean2 = 0
rSMN*_OG		71	0.31062	0.21155	0.02511	0.31146			t Statistic	DF	Prob>|t|		Alternative Hypothesis: mean1-mean2 <> 0
	Difference		0.59602		0.01685			Equal Variance Assumed	35.364	7399	2.97368e-253		At 0.05 level, when equal variance is assumed, Mean1 - Mean2 is significantly different from 0
	Overall	7401	0.90092	0.1528	0.00178	0.90069		Equal Variance NOT Assumed (Welch Correction)	23.689	70.5993	2.53684e-35		At 0.05 level, when equal variance is NOT assumed, Mean1 - Mean2 is significantly different from 0
		N	Mean	SD	SEM	Median
rMSN*_PG1SD		7330	1.1205	0.1755	0.00205	1.10019							Null Hypothesis: mean1-mean2 = 0
rMSN*_OG		71	6.73052	11.7139	1.39018	2.90268			t Statistic	DF	Prob>|t|		Alternative Hypothesis: mean1-mean2 <> 0
	Difference		-5.61002		0.13746			Equal Variance Assumed	-40.8125	7399	0		At 0.05 level, when equal variance is assumed, Mean1 - Mean2 is significantly different from 0
	Overall	7401	1.17432	1.27575	0.01483	1.10293		Equal Variance NOT Assumed (Welch Correction)	-4.03546	70.0003	0.000137303		At 0.05 level, when equal variance is NOT assumed, Mean1 - Mean2 is significantly different from 0
		N	Mean	SD	SEM	Median
rNSM*_PG1SD		7330	0.98106	0.40331	0.00471	0.9538							Null Hypothesis: mean1-mean2 = 0
rNSM*_OG		71	0.76072	0.57935	0.06876	0.63389			t Statistic	DF	Prob>|t|		Alternative Hypothesis: mean1-mean2 <> 0
	Difference		0.22034		0.04834			Equal Variance Assumed	4.55853	7399	5.23412e-06		At 0.05 level, when equal variance is assumed, Mean1 - Mean2 is significantly different from 0
	Overall	7401	0.97895	0.40587	0.00472	0.95066		Equal Variance NOT Assumed (Welch Correction)	3.19718	70.6587	0.00208		At 0.05 level, when equal variance is NOT assumed, Mean1 - Mean2 is significantly different from 0
rS*, rM* and rN* parameters of PGs and TSGs
		N	Mean	SD	SEM	Median
rS*_PG1SD		6020	0.92865	0.09854	0.00127	0.92959							Null Hypothesis: mean1-mean2 = 0
rS*_TSG		94	0.37184	0.17764	0.01832	0.38891			t Statistic	DF	Prob>|t|		Alternative Hypothesis: mean1-mean2 <> 0
	Difference		0.55681		0.01042			Equal Variance Assumed	53.4527	6112	0		At 0.05 level, when equal variance is assumed, Mean1 - Mean2 is significantly different from 0
	Overall	6114	0.92009	0.12139	0.00155	0.92703		Equal Variance NOT Assumed (Welch Correction)	30.3176	93.8959	2.74503e-50		At 0.05 level, when equal variance is NOT assumed, Mean1 - Mean2 is significantly different from 0
		N	Mean	SD	SEM	Median
rM*_PG1SD		6020	1.0269	0.0367	0.000472972	1.02709							Null Hypothesis: mean1-mean2 = 0
rM*_TSG		94	1.01318	0.15169	0.01565	1.02322			t Statistic	DF	Prob>|t|		Alternative Hypothesis: mean1-mean2 <> 0
	Difference		0.01371		0.00426			Equal Variance Assumed	3.22242	6112	0.00128		At 0.05 level, when equal variance is assumed, Mean1 - Mean2 is significantly different from 0
	Overall	6114	1.02669	0.04097	0.000524023	1.02706		Equal Variance NOT Assumed (Welch Correction)	0.87612	93.1701	0.38322		At 0.05 level, when equal variance is NOT assumed, Mean1 - Mean2 is NOT significantly different from 0
		N	Mean	SD	SEM	Median
rN*_PG1SD		6020	0.98826	0.31385	0.00405	0.97163							Null Hypothesis: mean1-mean2 = 0
rN*_TSG		94	4.23687	2.45051	0.25275	3.7104			t Statistic	DF	Prob>|t|		Alternative Hypothesis: mean1-mean2 <> 0
	Difference		-3.24861		0.04511			Equal Variance Assumed	-72.0093	6112	0		At 0.05 level, when equal variance is assumed, Mean1 - Mean2 is significantly different from 0
	Overall	6114	1.0382	0.59002	0.00755	0.97851		Equal Variance NOT Assumed (Welch Correction)	-12.8514	93.0477	2.44751e-22		At 0.05 level, when equal variance is NOT assumed, Mean1 - Mean2 is significantly different from 0
rSM*, rNM* and rNS* parameters of PGs and TSGs
		N	Mean	SD	SEM	Median
rSM*_PG1SD		7115	0.90415	0.13918	0.00165	0.89987							Null Hypothesis: mean1-mean2 = 0
rSM*_TSG		94	0.37429	0.17737	0.01829	0.37439			t Statistic	DF	Prob>|t|		Alternative Hypothesis: mean1-mean2 <> 0
	Difference		0.52986		0.01451			Equal Variance Assumed	36.5221	7207	4.23764e-268		At 0.05 level, when equal variance is assumed, Mean1 - Mean2 is significantly different from 0
	Overall	7209	0.89725	0.15211	0.00179	0.89679		Equal Variance NOT Assumed (Welch Correction)	28.8456	94.5191	1.21436e-48		At 0.05 level, when equal variance is NOT assumed, Mean1 - Mean2 is significantly different from 0
		N	Mean	SD	SEM	Median
rNM*_PG1SD		7115	0.95054	0.37207	0.00441	0.92938							Null Hypothesis: mean1-mean2 = 0
rNM*_TSG		94	4.78345	4.72281	0.48712	3.69485			t Statistic	DF	Prob>|t|		Alternative Hypothesis: mean1-mean2 <> 0
	Difference		-3.83291		0.06764			Equal Variance Assumed	-56.665	7207	0		At 0.05 level, when equal variance is assumed, Mean1 - Mean2 is significantly different from 0
	Overall	7209	1.00051	0.78327	0.00923	0.9349		Equal Variance NOT Assumed (Welch Correction)	-7.86819	93.0152	6.37771e-12		At 0.05 level, when equal variance is NOT assumed, Mean1 - Mean2 is significantly different from 0
		N	Mean	SD	SEM	Median
rNS*_PG1SD		7115	1.07754	0.45843	0.00543	1.02916							Null Hypothesis: mean1-mean2 = 0
rNS*_TSG		94	19.1857	21.9724	2.26628	11.2586			t Statistic	DF	Prob>|t|		Alternative Hypothesis: mean1-mean2 <> 0
	Difference		-18.1081		0.26342			Equal Variance Assumed	-68.7436	7207	0		At 0.05 level, when equal variance is assumed, Mean1 - Mean2 is significantly different from 0
	Overall	7209	1.31366	3.2645	0.03845	1.03599		Equal Variance NOT Assumed (Welch Correction)	-7.99021	93.0011	3.55247e-12		At 0.05 level, when equal variance is NOT assumed, Mean1 - Mean2 is significantly different from 0
rSMN*, rMSN* and rNSM*parameters of PGs and TSGs
		N	Mean	SD	SEM	Median
rSMN*_PG1SD		7334	0.90662	0.14051	0.00164	0.9026							Null Hypothesis: mean1-mean2 = 0
rSMN*_TSG		94	0.31353	0.16223	0.01673	0.31619			t Statistic	DF	Prob>|t|		Alternative Hypothesis: mean1-mean2 <> 0
	Difference		0.59309		0.01462			Equal Variance Assumed	40.5783	7426	0		At 0.05 level, when equal variance is assumed, Mean1 - Mean2 is significantly different from 0
	Overall	7428	0.89911	0.15563	0.00181	0.89985		Equal Variance NOT Assumed (Welch Correction)	35.2765	94.797	2.61111e-56		At 0.05 level, when equal variance is NOT assumed, Mean1 - Mean2 is significantly different from 0
		N	Mean	SD	SEM	Median
rMSN*_PG1SD		7334	1.12056	0.17554	0.00205	1.10019							Null Hypothesis: mean1-mean2 = 0
rMSN*_TSG		94	1.22494	0.60622	0.06253	1.07712			t Statistic	DF	Prob>|t|		Alternative Hypothesis: mean1-mean2 <> 0
	Difference		-0.10438		0.01943			Equal Variance Assumed	-5.37288	7426	7.98397e-08		At 0.05 level, when equal variance is assumed, Mean1 - Mean2 is significantly different from 0
	Overall	7428	1.12188	0.18752	0.00218	1.10002		Equal Variance NOT Assumed (Welch Correction)	-1.66854	93.2	0.09856		At 0.05 level, when equal variance is NOT assumed, Mean1 - Mean2 is NOT significantly different from 0
		N	Mean	SD	SEM	Median
rNSM*_PG1SD		7334	0.98093	0.40336	0.00471	0.9538							Null Hypothesis: mean1-mean2 = 0
rNSM*_TSG		94	5.76139	5.58718	0.57627	4.33893			t Statistic	DF	Prob>|t|		Alternative Hypothesis: mean1-mean2 <> 0
	Difference		-4.78046		0.07709			Equal Variance Assumed	-62.0087	7426	0		At 0.05 level, when equal variance is assumed, Mean1 - Mean2 is significantly different from 0
	Overall	7428	1.04143	0.91494	0.01062	0.95887		Equal Variance NOT Assumed (Welch Correction)	-8.29518	93.0124	8.15773e-13		At 0.05 level, when equal variance is NOT assumed, Mean1 - Mean2 is significantly different from 0

## Sheet: Two-Sample t-Tests 2
Two sample t-Tests of passenger genes (PG) and candidate oncogenes (OG), candidate tumor suppressor genes (TSG), candidate tumor essential genes (TEG)
Parameters: observed/expected ratios rS*, rM*, rN*; rSM*, rNM*, rNS*; rSMN*, rMSN* and rNSM*
rS*, rM* and rN* parameters of PGs and candidate OGs
		N	Mean	SD	SEM	Median
rS*_PG1SD		6020	0.92865	0.09854	0.00127	0.92959							Null Hypothesis: mean1-mean2 = 0
rS*_CG2SD_rMSN>1.50		121	0.29354	0.13217	0.01202	0.34176			t Statistic	DF	Prob>|t|		Alternative Hypothesis: mean1-mean2 <> 0
	Difference		0.63511		0.00912			Equal Variance Assumed	69.6513	6139	0		At 0.05 level, when equal variance is assumed, Mean1 - Mean2 is significantly different from 0
	Overall	6141	0.91613	0.13287	0.0017	0.92636		Equal Variance NOT Assumed (Welch Correction)	52.5662	122.696	5.36868e-86		At 0.05 level, when equal variance is NOT assumed, Mean1 - Mean2 is significantly different from 0
		N	Mean	SD	SEM	Median
rM*_PG1SD		6020	1.0269	0.0367	0.000472972	1.02709							Null Hypothesis: mean1-mean2 = 0
rM*_CG2SD_rMSN>1.50		121	1.2504	0.08475	0.0077	1.24685			t Statistic	DF	Prob>|t|		Alternative Hypothesis: mean1-mean2 <> 0
	Difference		-0.2235		0.00351			Equal Variance Assumed	-63.6882	6139	0		At 0.05 level, when equal variance is assumed, Mean1 - Mean2 is significantly different from 0
	Overall	6141	1.0313	0.04925	0.000628471	1.02813		Equal Variance NOT Assumed (Welch Correction)	-28.9536	120.906	3.25747e-56		At 0.05 level, when equal variance is NOT assumed, Mean1 - Mean2 is significantly different from 0
		N	Mean	SD	SEM	Median
rN*_PG1SD		6020	0.98826	0.31385	0.00405	0.97163							Null Hypothesis: mean1-mean2 = 0
rN*_CG2SD_rMSN>1.50		121	1.26395	1.00177	0.09107	0.88625			t Statistic	DF	Prob>|t|		Alternative Hypothesis: mean1-mean2 <> 0
	Difference		-0.27569		0.0313			Equal Variance Assumed	-8.8087	6139	1.62464e-18		At 0.05 level, when equal variance is assumed, Mean1 - Mean2 is significantly different from 0
	Overall	6141	0.99369	0.34299	0.00438	0.97109		Equal Variance NOT Assumed (Welch Correction)	-3.02429	120.474	0.00305		At 0.05 level, when equal variance is NOT assumed, Mean1 - Mean2 is significantly different from 0
rSM*, rNM* and rNS* parameters of PGs and candidate OGs
		N	Mean	SD	SEM	Median
rSM*_PG1SD		7115	0.90415	0.13918	0.00165	0.89987							Null Hypothesis: mean1-mean2 = 0
rSM*_CG2SD_rMSN>1.50		121	0.23936	0.11331	0.0103	0.28343			t Statistic	DF	Prob>|t|		Alternative Hypothesis: mean1-mean2 <> 0
	Difference		0.66479		0.01272			Equal Variance Assumed	52.2462	7234	0		At 0.05 level, when equal variance is assumed, Mean1 - Mean2 is significantly different from 0
	Overall	7236	0.89304	0.16287	0.00191	0.89624		Equal Variance NOT Assumed (Welch Correction)	63.7268	126.236	7.41131e-98		At 0.05 level, when equal variance is NOT assumed, Mean1 - Mean2 is significantly different from 0
		N	Mean	SD	SEM	Median
rNM*_PG1SD		7115	0.95054	0.37207	0.00441	0.92938							Null Hypothesis: mean1-mean2 = 0
rNM*_CG2SD_rMSN>1.50		121	1.05583	0.87103	0.07918	0.71077			t Statistic	DF	Prob>|t|		Alternative Hypothesis: mean1-mean2 <> 0
	Difference		-0.1053		0.03536			Equal Variance Assumed	-2.97814	7234	0.00291		At 0.05 level, when equal variance is assumed, Mean1 - Mean2 is significantly different from 0
	Overall	7236	0.9523	0.38586	0.00454	0.92866		Equal Variance NOT Assumed (Welch Correction)	-1.32769	120.746	0.18679		At 0.05 level, when equal variance is NOT assumed, Mean1 - Mean2 is NOT significantly different from 0
		N	Mean	SD	SEM	Median
rNS*_PG1SD		7115	1.07754	0.45843	0.00543	1.02916							Null Hypothesis: mean1-mean2 = 0
rNS*_CG2SD_rMSN>1.50		121	7.76525	16.9553	1.54139	3.18919			t Statistic	DF	Prob>|t|		Alternative Hypothesis: mean1-mean2 <> 0
	Difference		-6.68771		0.2045			Equal Variance Assumed	-32.7032	7234	6.63057e-219		At 0.05 level, when equal variance is assumed, Mean1 - Mean2 is significantly different from 0
	Overall	7236	1.18937	2.38962	0.02809	1.03666		Equal Variance NOT Assumed (Welch Correction)	-4.33873	120.003	3.00516e-05		At 0.05 level, when equal variance is NOT assumed, Mean1 - Mean2 is significantly different from 0
rSMN*, rMSN* and rNSM* parameters of PGs and candidate OGs
		N	Mean	SD	SEM	Median
rSMN*_PG1SD		7334	0.90662	0.14051	0.00164	0.9026							Null Hypothesis: mean1-mean2 = 0
rSMN*_CG2SD_rMSN>1.50		121	0.23845	0.11178	0.01016	0.27765			t Statistic	DF	Prob>|t|		Alternative Hypothesis: mean1-mean2 <> 0
	Difference		0.66817		0.01284			Equal Variance Assumed	52.0344	7453	0		At 0.05 level, when equal variance is assumed, Mean1 - Mean2 is significantly different from 0
	Overall	7455	0.89577	0.16357	0.00189	0.89877		Equal Variance NOT Assumed (Welch Correction)	64.9097	126.337	6.83798e-99		At 0.05 level, when equal variance is NOT assumed, Mean1 - Mean2 is significantly different from 0
		N	Mean	SD	SEM	Median
rMSN*_PG1SD		7334	1.12056	0.17554	0.00205	1.10019							Null Hypothesis: mean1-mean2 = 0
rMSN*_CG2SD_rMSN>1.50		121	5.13801	9.17713	0.83428	2.75786			t Statistic	DF	Prob>|t|		Alternative Hypothesis: mean1-mean2 <> 0
	Difference		-4.01745		0.10792			Equal Variance Assumed	-37.2268	7453	2.3333e-278		At 0.05 level, when equal variance is assumed, Mean1 - Mean2 is significantly different from 0
	Overall	7455	1.18577	1.28214	0.01485	1.10438		Equal Variance NOT Assumed (Welch Correction)	-4.81543	120.001	4.32871e-06		At 0.05 level, when equal variance is NOT assumed, Mean1 - Mean2 is significantly different from 0
		N	Mean	SD	SEM	Median
rNSM*_PG1SD		7334	0.98093	0.40336	0.00471	0.9538							Null Hypothesis: mean1-mean2 = 0
rNSM*_CG2SD_rMSN>1.50		121	1.32951	1.11826	0.10166	0.88161			t Statistic	DF	Prob>|t|		Alternative Hypothesis: mean1-mean2 <> 0
	Difference		-0.34858		0.03891			Equal Variance Assumed	-8.9586	7453	4.09679e-19		At 0.05 level, when equal variance is assumed, Mean1 - Mean2 is significantly different from 0
	Overall	7455	0.98659	0.42677	0.00494	0.9535		Equal Variance NOT Assumed (Welch Correction)	-3.42519	120.516	0.00084057		At 0.05 level, when equal variance is NOT assumed, Mean1 - Mean2 is significantly different from 0
rS*, rM* and rN*parameters of PGs and candidate TSGs
		N	Mean	SD	SEM	Median
rS*_PG1SD		6020	0.92865	0.09854	0.00127	0.92959							Null Hypothesis: mean1-mean2 = 0
rS*_CG2SD_rNSM>3.0		164	0.49503	0.22555	0.01761	0.47285			t Statistic	DF	Prob>|t|		Alternative Hypothesis: mean1-mean2 <> 0
	Difference		0.43362		0.00822			Equal Variance Assumed	52.7305	6182	0		At 0.05 level, when equal variance is assumed, Mean1 - Mean2 is significantly different from 0
	Overall	6184	0.91715	0.1251	0.00159	0.9256		Equal Variance NOT Assumed (Welch Correction)	24.5564	164.7	6.21095e-57		At 0.05 level, when equal variance is NOT assumed, Mean1 - Mean2 is significantly different from 0
		N	Mean	SD	SEM	Median
rM*_PG1SD		6020	1.0269	0.0367	0.000472972	1.02709							Null Hypothesis: mean1-mean2 = 0
rM*_CG2SD_rNSM>3.0		164	0.96579	0.11798	0.00921	0.97871			t Statistic	DF	Prob>|t|		Alternative Hypothesis: mean1-mean2 <> 0
	Difference		0.06111		0.00324			Equal Variance Assumed	18.8488	6182	4.22427e-77		At 0.05 level, when equal variance is assumed, Mean1 - Mean2 is significantly different from 0
	Overall	6184	1.02528	0.04212	0.000535655	1.02631		Equal Variance NOT Assumed (Welch Correction)	6.62459	163.86	4.77335e-10		At 0.05 level, when equal variance is NOT assumed, Mean1 - Mean2 is significantly different from 0
		N	Mean	SD	SEM	Median
rN*_PG1SD		6020	0.98826	0.31385	0.00405	0.97163							Null Hypothesis: mean1-mean2 = 0
rN*_CG2SD_rNSM>3.0		164	4.38577	1.97135	0.15394	3.73553			t Statistic	DF	Prob>|t|		Alternative Hypothesis: mean1-mean2 <> 0
	Difference		-3.39751		0.03525			Equal Variance Assumed	-96.3847	6182	0		At 0.05 level, when equal variance is assumed, Mean1 - Mean2 is significantly different from 0
	Overall	6184	1.07836	0.70455	0.00896	0.98476		Equal Variance NOT Assumed (Welch Correction)	-22.0632	163.225	7.55733e-51		At 0.05 level, when equal variance is NOT assumed, Mean1 - Mean2 is significantly different from 0
rSM*, rNM* and rNS* parameters of PGs and candidate TSGs
		N	Mean	SD	SEM	Median
rSM*_PG1SD		7115	0.90415	0.13918	0.00165	0.89987							Null Hypothesis: mean1-mean2 = 0
rSM*_CG2SD_rNSM>3.0		164	0.52501	0.25612	0.02	0.49055			t Statistic	DF	Prob>|t|		Alternative Hypothesis: mean1-mean2 <> 0
	Difference		0.37914		0.01128			Equal Variance Assumed	33.6037	7277	2.90136e-230		At 0.05 level, when equal variance is assumed, Mean1 - Mean2 is significantly different from 0
	Overall	7279	0.89561	0.15353	0.0018	0.89549		Equal Variance NOT Assumed (Welch Correction)	18.8929	165.226	3.88404e-43		At 0.05 level, when equal variance is NOT assumed, Mean1 - Mean2 is significantly different from 0
		N	Mean	SD	SEM	Median
rNM*_PG1SD		7115	0.95054	0.37207	0.00441	0.92938							Null Hypothesis: mean1-mean2 = 0
rNM*_CG2SD_rNSM>3.0		164	4.91348	3.78792	0.29579	3.7393			t Statistic	DF	Prob>|t|		Alternative Hypothesis: mean1-mean2 <> 0
	Difference		-3.96294		0.05338			Equal Variance Assumed	-74.2438	7277	0		At 0.05 level, when equal variance is assumed, Mean1 - Mean2 is significantly different from 0
	Overall	7279	1.03982	0.89587	0.0105	0.93873		Equal Variance NOT Assumed (Welch Correction)	-13.3965	163.073	4.48402e-28		At 0.05 level, when equal variance is NOT assumed, Mean1 - Mean2 is significantly different from 0
		N	Mean	SD	SEM	Median
rNS*_PG1SD		7115	1.07754	0.45843	0.00543	1.02916							Null Hypothesis: mean1-mean2 = 0
rNS*_CG2SD_rNSM>3.0		164	14.1674	17.2553	1.34741	7.52577			t Statistic	DF	Prob>|t|		Alternative Hypothesis: mean1-mean2 <> 0
	Difference		-13.0899		0.20709			Equal Variance Assumed	-63.2093	7277	0		At 0.05 level, when equal variance is assumed, Mean1 - Mean2 is significantly different from 0
	Overall	7279	1.37246	3.26311	0.03825	1.04266		Equal Variance NOT Assumed (Welch Correction)	-9.71475	163.005	6.92532e-18		At 0.05 level, when equal variance is NOT assumed, Mean1 - Mean2 is significantly different from 0
rSMN*, rMSN* and rNSM* parameters of PGs and candidate TSGs
		N	Mean	SD	SEM	Median
rSMN*_PG1SD		7334	0.90662	0.14051	0.00164	0.9026							Null Hypothesis: mean1-mean2 = 0
rSMN*_CG2SD_rNSM>3.0		164	0.43596	0.22344	0.01745	0.40847			t Statistic	DF	Prob>|t|		Alternative Hypothesis: mean1-mean2 <> 0
	Difference		0.47066		0.01128			Equal Variance Assumed	41.7358	7496	0		At 0.05 level, when equal variance is assumed, Mean1 - Mean2 is significantly different from 0
	Overall	7498	0.89632	0.15855	0.00183	0.89736		Equal Variance NOT Assumed (Welch Correction)	26.8569	165.895	2.72132e-62		At 0.05 level, when equal variance is NOT assumed, Mean1 - Mean2 is significantly different from 0
		N	Mean	SD	SEM	Median
rMSN*_PG1SD		7334	1.12056	0.17554	0.00205	1.10019							Null Hypothesis: mean1-mean2 = 0
rMSN*_CG2SD_rNSM>3.0		164	0.97388	0.35462	0.02769	0.9328			t Statistic	DF	Prob>|t|		Alternative Hypothesis: mean1-mean2 <> 0
	Difference		0.14668		0.01432			Equal Variance Assumed	10.2454	7496	1.79789e-24		At 0.05 level, when equal variance is assumed, Mean1 - Mean2 is significantly different from 0
	Overall	7498	1.11735	0.18258	0.00211	1.09739		Equal Variance NOT Assumed (Welch Correction)	5.28254	164.791	3.98352e-07		At 0.05 level, when equal variance is NOT assumed, Mean1 - Mean2 is significantly different from 0
		N	Mean	SD	SEM	Median
rNSM*_PG1SD		7334	0.98093	0.40336	0.00471	0.9538							Null Hypothesis: mean1-mean2 = 0
rNSM*_CG2SD_rNSM>3.0		164	5.68238	4.44841	0.34736	4.25871			t Statistic	DF	Prob>|t|		Alternative Hypothesis: mean1-mean2 <> 0
	Difference		-4.70145		0.06062			Equal Variance Assumed	-77.5576	7496	0		At 0.05 level, when equal variance is assumed, Mean1 - Mean2 is significantly different from 0
	Overall	7498	1.08376	1.0307	0.0119	0.96385		Equal Variance NOT Assumed (Welch Correction)	-13.5335	163.06	1.8658e-28		At 0.05 level, when equal variance is NOT assumed, Mean1 - Mean2 is significantly different from 0
rS*, rM* and rN* parameters of PGs and candidate TEGs
		N	Mean	SD	SEM	Median
rS*_PG1SD		6020	0.92865	0.09854	0.00127	0.92959							Null Hypothesis: mean1-mean2 = 0
rS*_CG2SD_ rSMN>1.50		231	1.44688	0.18834	0.01239	1.38372			t Statistic	DF	Prob>|t|		Alternative Hypothesis: mean1-mean2 <> 0
	Difference		-0.51823		0.00692			Equal Variance Assumed	-74.8676	6249	0		At 0.05 level, when equal variance is assumed, Mean1 - Mean2 is significantly different from 0
	Overall	6251	0.9478	0.14218	0.0018	0.93577		Equal Variance NOT Assumed (Welch Correction)	-41.6024	234.857	2.47109e-110		At 0.05 level, when equal variance is NOT assumed, Mean1 - Mean2 is significantly different from 0
		N	Mean	SD	SEM	Median
rM*_PG1SD		6020	1.0269	0.0367	0.000472972	1.02709							Null Hypothesis: mean1-mean2 = 0
rM*_CG2SD_ rSMN>1.50		231	0.84218	0.06087	0.00401	0.85417			t Statistic	DF	Prob>|t|		Alternative Hypothesis: mean1-mean2 <> 0
	Difference		0.18471		0.00254			Equal Variance Assumed	72.7661	6249	0		At 0.05 level, when equal variance is assumed, Mean1 - Mean2 is significantly different from 0
	Overall	6251	1.02007	0.05146	0.000650821	1.0249		Equal Variance NOT Assumed (Welch Correction)	45.8009	236.458	1.4897e-119		At 0.05 level, when equal variance is NOT assumed, Mean1 - Mean2 is significantly different from 0
		N	Mean	SD	SEM	Median
rN*_PG1SD		6020	0.98826	0.31385	0.00405	0.97163							Null Hypothesis: mean1-mean2 = 0
rN*_CG2SD_ rSMN>1.50		231	0.75058	0.47564	0.0313	0.68299			t Statistic	DF	Prob>|t|		Alternative Hypothesis: mean1-mean2 <> 0
	Difference		0.23768		0.02154			Equal Variance Assumed	11.035	6249	4.69676e-28		At 0.05 level, when equal variance is assumed, Mean1 - Mean2 is significantly different from 0
	Overall	6251	0.97947	0.32434	0.0041	0.96308		Equal Variance NOT Assumed (Welch Correction)	7.53203	237.747	1.03714e-12		At 0.05 level, when equal variance is NOT assumed, Mean1 - Mean2 is significantly different from 0
rSM*, rNM*and rNS* parameters of PGs and candidate TEGs
		N	Mean	SD	SEM	Median
rSM*_PG1SD		7115	0.90415	0.13918	0.00165	0.89987							Null Hypothesis: mean1-mean2 = 0
rSM*_CG2SD_ rSMN>1.50		231	1.74712	0.44684	0.0294	1.61244			t Statistic	DF	Prob>|t|		Alternative Hypothesis: mean1-mean2 <> 0
	Difference		-0.84297		0.01057			Equal Variance Assumed	-79.7176	7344	0		At 0.05 level, when equal variance is assumed, Mean1 - Mean2 is significantly different from 0
	Overall	7346	0.93066	0.21601	0.00252	0.90708		Equal Variance NOT Assumed (Welch Correction)	-28.6273	231.451	5.31918e-78		At 0.05 level, when equal variance is NOT assumed, Mean1 - Mean2 is significantly different from 0
		N	Mean	SD	SEM	Median
rNM*_PG1SD		7115	0.95054	0.37207	0.00441	0.92938							Null Hypothesis: mean1-mean2 = 0
rNM*_CG2SD_ rSMN>1.50		231	0.90689	0.60298	0.03967	0.80218			t Statistic	DF	Prob>|t|		Alternative Hypothesis: mean1-mean2 <> 0
	Difference		0.04365		0.0255			Equal Variance Assumed	1.71155	7344	0.08702		At 0.05 level, when equal variance is assumed, Mean1 - Mean2 is NOT significantly different from 0
	Overall	7346	0.94916	0.38148	0.00445	0.9261		Equal Variance NOT Assumed (Welch Correction)	1.09339	235.721	0.27534		At 0.05 level, when equal variance is NOT assumed, Mean1 - Mean2 is NOT significantly different from 0
		N	Mean	SD	SEM	Median
rNS*_PG1SD		7115	1.07754	0.45843	0.00543	1.02916							Null Hypothesis: mean1-mean2 = 0
rNS*_CG2SD_ rSMN>1.50		231	0.5301	0.34404	0.02264	0.48835			t Statistic	DF	Prob>|t|		Alternative Hypothesis: mean1-mean2 <> 0
	Difference		0.54744		0.03044			Equal Variance Assumed	17.9856	7344	8.22102e-71		At 0.05 level, when equal variance is assumed, Mean1 - Mean2 is significantly different from 0
	Overall	7346	1.06033	0.46517	0.00543	1.01598		Equal Variance NOT Assumed (Welch Correction)	23.5162	257.254	4.87686e-66		At 0.05 level, when equal variance is NOT assumed, Mean1 - Mean2 is significantly different from 0
rSMN*, rMSN* and rNSM* parameters of PGs and candidate TEGs
		N	Mean	SD	SEM	Median
rSMN*_PG1SD		7334	0.90662	0.14051	0.00164	0.9026							Null Hypothesis: mean1-mean2 = 0
rSMN*_CG2SD_ rSMN>1.50		231	1.75857	0.4565	0.03004	1.61533			t Statistic	DF	Prob>|t|		Alternative Hypothesis: mean1-mean2 <> 0
	Difference		-0.85195		0.01067			Equal Variance Assumed	-79.8688	7563	0		At 0.05 level, when equal variance is assumed, Mean1 - Mean2 is significantly different from 0
	Overall	7565	0.93263	0.21672	0.00249	0.90929		Equal Variance NOT Assumed (Welch Correction)	-28.3225	231.375	3.76523e-77		At 0.05 level, when equal variance is NOT assumed, Mean1 - Mean2 is significantly different from 0
		N	Mean	SD	SEM	Median
rMSN*_PG1SD		7334	1.12056	0.17554	0.00205	1.10019							Null Hypothesis: mean1-mean2 = 0
rMSN*_CG2SD_ rSMN>1.50		231	0.63329	0.09397	0.00618	0.65038			t Statistic	DF	Prob>|t|		Alternative Hypothesis: mean1-mean2 <> 0
	Difference		0.48727		0.0116			Equal Variance Assumed	41.998	7563	0		At 0.05 level, when equal variance is assumed, Mean1 - Mean2 is significantly different from 0
	Overall	7565	1.10568	0.1928	0.00222	1.0916		Equal Variance NOT Assumed (Welch Correction)	74.8069	283.231	1.42048e-188		At 0.05 level, when equal variance is NOT assumed, Mean1 - Mean2 is significantly different from 0
		N	Mean	SD	SEM	Median
rNSM*_PG1SD		7334	0.98093	0.40336	0.00471	0.9538							Null Hypothesis: mean1-mean2 = 0
rNSM*_CG2SD_ rSMN>1.50		231	0.75179	0.49247	0.0324	0.67663			t Statistic	DF	Prob>|t|		Alternative Hypothesis: mean1-mean2 <> 0
	Difference		0.22914		0.02715			Equal Variance Assumed	8.43823	7563	3.82348e-17		At 0.05 level, when equal variance is assumed, Mean1 - Mean2 is significantly different from 0
	Overall	7565	0.97393	0.40824	0.00469	0.94687		Equal Variance NOT Assumed (Welch Correction)	6.99806	239.819	2.57994e-11		At 0.05 level, when equal variance is NOT assumed, Mean1 - Mean2 is significantly different from 0

## Sheet: Two-Sample t-Tests 3
Two sample t-Tests of passenger genes (PG) and novel oncogenes (OG), novel tumor suppressor genes (TSG), and tumor essential genes (TEG)
Parameters: observed/expected ratios rS*, rM*, rN*; rSM*, rNM*, rNS*; rSMN*, rMSN* and rNSM*
rS*, rM* and rN*parameters of PGs and novel OGs
		N	Mean	SD	SEM	Median
rS*_PG1SD		6020	0.92865	0.09854	0.00127	0.92959							Null Hypothesis: mean1-mean2 = 0
rS*_novel OG		8	0.41105	0.07313	0.02586	0.38825			t Statistic	DF	Prob>|t|		Alternative Hypothesis: mean1-mean2 <> 0
	Difference		0.51759		0.03485			Equal Variance Assumed	14.8502	6026	5.06403e-49		At 0.05 level, when equal variance is assumed, Mean1 - Mean2 is significantly different from 0
	Overall	6028	0.92796	0.1003	0.00129	0.9295		Equal Variance NOT Assumed (Welch Correction)	19.9948	7.03382	1.855e-07		At 0.05 level, when equal variance is NOT assumed, Mean1 - Mean2 is significantly different from 0
		N	Mean	SD	SEM	Median
rM*_PG1SD		6020	1.0269	0.0367	0.000472972	1.02709							Null Hypothesis: mean1-mean2 = 0
rM*_novel OG		8	1.18381	0.05664	0.02002	1.19154			t Statistic	DF	Prob>|t|		Alternative Hypothesis: mean1-mean2 <> 0
	Difference		-0.15691		0.01299			Equal Variance Assumed	-12.0761	6026	3.40809e-33		At 0.05 level, when equal variance is assumed, Mean1 - Mean2 is significantly different from 0
	Overall	6028	1.02711	0.03717	0.000478687	1.02714		Equal Variance NOT Assumed (Welch Correction)	-7.83397	7.00781	0.000103576		At 0.05 level, when equal variance is NOT assumed, Mean1 - Mean2 is significantly different from 0
		N	Mean	SD	SEM	Median
rN*_PG1SD		6020	0.98826	0.31385	0.00405	0.97163							Null Hypothesis: mean1-mean2 = 0
rN*_novel OG		8	1.29155	0.59211	0.20934	1.12509			t Statistic	DF	Prob>|t|		Alternative Hypothesis: mean1-mean2 <> 0
	Difference		-0.3033		0.1112			Equal Variance Assumed	-2.72749	6026	0.0064		At 0.05 level, when equal variance is assumed, Mean1 - Mean2 is significantly different from 0
	Overall	6028	0.98866	0.31448	0.00405	0.97198		Equal Variance NOT Assumed (Welch Correction)	-1.44854	7.00523	0.1907		At 0.05 level, when equal variance is NOT assumed, Mean1 - Mean2 is NOT significantly different from 0
rSM*, rNM* and rNS* parameters of PGs and novel OGs
		N	Mean	SD	SEM	Median
rSM*_PG1SD		7115	0.90415	0.13918	0.00165	0.89987							Null Hypothesis: mean1-mean2 = 0
rSM*_novel OG		8	0.34881	0.07001	0.02475	0.34537			t Statistic	DF	Prob>|t|		Alternative Hypothesis: mean1-mean2 <> 0
	Difference		0.55534		0.04922			Equal Variance Assumed	11.2835	7121	2.80275e-29		At 0.05 level, when equal variance is assumed, Mean1 - Mean2 is significantly different from 0
	Overall	7123	0.90353	0.14036	0.00166	0.89956		Equal Variance NOT Assumed (Welch Correction)	22.3868	7.06235	8.06698e-08		At 0.05 level, when equal variance is NOT assumed, Mean1 - Mean2 is significantly different from 0
		N	Mean	SD	SEM	Median
rNM*_PG1SD		7115	0.95054	0.37207	0.00441	0.92938							Null Hypothesis: mean1-mean2 = 0
rNM*_novel OG		8	1.10953	0.56369	0.19929	0.9267			t Statistic	DF	Prob>|t|		Alternative Hypothesis: mean1-mean2 <> 0
	Difference		-0.15899		0.13171			Equal Variance Assumed	-1.20717	7121	0.22741		At 0.05 level, when equal variance is assumed, Mean1 - Mean2 is NOT significantly different from 0
	Overall	7123	0.95071	0.37232	0.00441	0.92938		Equal Variance NOT Assumed (Welch Correction)	-0.79758	7.00686	0.45129		At 0.05 level, when equal variance is NOT assumed, Mean1 - Mean2 is NOT significantly different from 0
		N	Mean	SD	SEM	Median
rNS*_PG1SD		7115	1.07754	0.45843	0.00543	1.02916							Null Hypothesis: mean1-mean2 = 0
rNS*_novel OG		8	3.28205	1.73413	0.61311	3.16641			t Statistic	DF	Prob>|t|		Alternative Hypothesis: mean1-mean2 <> 0
	Difference		-2.20451		0.16323			Equal Variance Assumed	-13.5058	7121	4.61629e-41		At 0.05 level, when equal variance is assumed, Mean1 - Mean2 is significantly different from 0
	Overall	7123	1.08002	0.46726	0.00554	1.0293		Equal Variance NOT Assumed (Welch Correction)	-3.59549	7.0011	0.00879		At 0.05 level, when equal variance is NOT assumed, Mean1 - Mean2 is significantly different from 0
rSMN*, rMSN* and rNSM* parameters of PGs and novel OGs
		N	Mean	SD	SEM	Median
rSMN*_PG1SD		7334	0.90662	0.14051	0.00164	0.9026							Null Hypothesis: mean1-mean2 = 0
rSMN*_novel OG		8	0.34555	0.07254	0.02565	0.32428			t Statistic	DF	Prob>|t|		Alternative Hypothesis: mean1-mean2 <> 0
	Difference		0.56107		0.04969			Equal Variance Assumed	11.2917	7340	2.51618e-29		At 0.05 level, when equal variance is assumed, Mean1 - Mean2 is significantly different from 0
	Overall	7342	0.90601	0.14167	0.00165	0.90234		Equal Variance NOT Assumed (Welch Correction)	21.8336	7.05743	9.6848e-08		At 0.05 level, when equal variance is NOT assumed, Mean1 - Mean2 is significantly different from 0
		N	Mean	SD	SEM	Median
rMSN*_PG1SD		7334	1.12056	0.17554	0.00205	1.10019							Null Hypothesis: mean1-mean2 = 0
rMSN*_novel OG		8	2.17192	0.54303	0.19199	2.19777			t Statistic	DF	Prob>|t|		Alternative Hypothesis: mean1-mean2 <> 0
	Difference		-1.05136		0.06235			Equal Variance Assumed	-16.8622	7340	1.27505e-62		At 0.05 level, when equal variance is assumed, Mean1 - Mean2 is significantly different from 0
	Overall	7342	1.12171	0.17963	0.0021	1.10061		Equal Variance NOT Assumed (Welch Correction)	-5.47577	7.0016	0.000929426		At 0.05 level, when equal variance is NOT assumed, Mean1 - Mean2 is significantly different from 0
		N	Mean	SD	SEM	Median
rNSM*_PG1SD		7334	0.98093	0.40336	0.00471	0.9538							Null Hypothesis: mean1-mean2 = 0
rNSM*_novel OG		8	1.33729	0.68	0.24042	1.13203			t Statistic	DF	Prob>|t|		Alternative Hypothesis: mean1-mean2 <> 0
	Difference		-0.35636		0.14281			Equal Variance Assumed	-2.49528	7340	0.01261		At 0.05 level, when equal variance is assumed, Mean1 - Mean2 is significantly different from 0
	Overall	7342	0.98132	0.40386	0.00471	0.95427		Equal Variance NOT Assumed (Welch Correction)	-1.48198	7.00537	0.18187		At 0.05 level, when equal variance is NOT assumed, Mean1 - Mean2 is NOT significantly different from 0
rS*, rM* and rN* parameters of PGs and novel TSGs
		N	Mean	SD	SEM	Median
rS*_PG1SD		6020	0.92865	0.09854	0.00127	0.92959							Null Hypothesis: mean1-mean2 = 0
rS*novel_TSG		21	0.72118	0.20468	0.04466	0.73589			t Statistic	DF	Prob>|t|		Alternative Hypothesis: mean1-mean2 <> 0
	Difference		0.20747		0.02166			Equal Variance Assumed	9.57895	6039	1.39476e-21		At 0.05 level, when equal variance is assumed, Mean1 - Mean2 is significantly different from 0
	Overall	6041	0.92793	0.09982	0.00128	0.92927		Equal Variance NOT Assumed (Welch Correction)	4.64332	20.0324	0.000156143		At 0.05 level, when equal variance is NOT assumed, Mean1 - Mean2 is significantly different from 0
		N	Mean	SD	SEM	Median
rM*_PG1SD		6020	1.0269	0.0367	0.000472972	1.02709							Null Hypothesis: mean1-mean2 = 0
rM*novel_TSG		21	0.92747	0.09969	0.02175	0.91462			t Statistic	DF	Prob>|t|		Alternative Hypothesis: mean1-mean2 <> 0
	Difference		0.09943		0.00811			Equal Variance Assumed	12.2655	6039	3.52829e-34		At 0.05 level, when equal variance is assumed, Mean1 - Mean2 is significantly different from 0
	Overall	6041	1.02655	0.03754	0.000482977	1.02698		Equal Variance NOT Assumed (Welch Correction)	4.56953	20.0189	0.000185675		At 0.05 level, when equal variance is NOT assumed, Mean1 - Mean2 is significantly different from 0
		N	Mean	SD	SEM	Median
rN*_PG1SD		6020	0.98826	0.31385	0.00405	0.97163							Null Hypothesis: mean1-mean2 = 0
rN*novel_TSG		21	3.89949	1.81999	0.39715	4.04048			t Statistic	DF	Prob>|t|		Alternative Hypothesis: mean1-mean2 <> 0
	Difference		-2.91123		0.07222			Equal Variance Assumed	-40.3117	6039	0		At 0.05 level, when equal variance is assumed, Mean1 - Mean2 is significantly different from 0
	Overall	6041	0.99838	0.37214	0.00479	0.97341		Equal Variance NOT Assumed (Welch Correction)	-7.32985	20.0041	4.37653e-07		At 0.05 level, when equal variance is NOT assumed, Mean1 - Mean2 is significantly different from 0
rSM*, rNM* and rNS*parameters of PGs and novel TSGs
		N	Mean	SD	SEM	Median
rSM*_PG1SD		7115	0.90415	0.13918	0.00165	0.89987							Null Hypothesis: mean1-mean2 = 0
rSM*novel_TSG		21	0.79505	0.25834	0.05637	0.82334			t Statistic	DF	Prob>|t|		Alternative Hypothesis: mean1-mean2 <> 0
	Difference		0.10911		0.03052			Equal Variance Assumed	3.57489	7134	0.000352689		At 0.05 level, when equal variance is assumed, Mean1 - Mean2 is significantly different from 0
	Overall	7136	0.90383	0.13977	0.00165	0.89954		Equal Variance NOT Assumed (Welch Correction)	1.93459	20.0343	0.06729		At 0.05 level, when equal variance is NOT assumed, Mean1 - Mean2 is NOT significantly different from 0
		N	Mean	SD	SEM	Median
rNM*_PG1SD		7115	0.95054	0.37207	0.00441	0.92938							Null Hypothesis: mean1-mean2 = 0
rNM*novel_TSG		21	4.38728	2.41416	0.52681	4.12232			t Statistic	DF	Prob>|t|		Alternative Hypothesis: mean1-mean2 <> 0
	Difference		-3.43675		0.08587			Equal Variance Assumed	-40.0227	7134	0		At 0.05 level, when equal variance is assumed, Mean1 - Mean2 is significantly different from 0
	Overall	7136	0.96065	0.43478	0.00515	0.93104		Equal Variance NOT Assumed (Welch Correction)	-6.52341	20.0028	2.33438e-06		At 0.05 level, when equal variance is NOT assumed, Mean1 - Mean2 is significantly different from 0
		N	Mean	SD	SEM	Median
rNS*_PG1SD		7115	1.07754	0.45843	0.00543	1.02916							Null Hypothesis: mean1-mean2 = 0
rNS*novel_TSG		21	6.18089	3.67205	0.80131	6.08955			t Statistic	DF	Prob>|t|		Alternative Hypothesis: mean1-mean2 <> 0
	Difference		-5.10334		0.10869			Equal Variance Assumed	-46.9519	7134	0		At 0.05 level, when equal variance is assumed, Mean1 - Mean2 is significantly different from 0
	Overall	7136	1.09256	0.569	0.00674	1.02971		Equal Variance NOT Assumed (Welch Correction)	-6.36863	20.0018	3.2513e-06		At 0.05 level, when equal variance is NOT assumed, Mean1 - Mean2 is significantly different from 0
rSMN*, rMSN* and rNSM* parameters of PGs and novel TSGs
		N	Mean	SD	SEM	Median
rSMN*_PG1SD		7334	0.90662	0.14051	0.00164	0.9026							Null Hypothesis: mean1-mean2 = 0
rSMN*novel_TSG		21	0.67214	0.22783	0.04972	0.66986			t Statistic	DF	Prob>|t|		Alternative Hypothesis: mean1-mean2 <> 0
	Difference		0.23448		0.03077			Equal Variance Assumed	7.61915	7353	2.8729e-14		At 0.05 level, when equal variance is assumed, Mean1 - Mean2 is significantly different from 0
	Overall	7355	0.90595	0.14137	0.00165	0.90207		Equal Variance NOT Assumed (Welch Correction)	4.71361	20.0436	0.000132441		At 0.05 level, when equal variance is NOT assumed, Mean1 - Mean2 is significantly different from 0
		N	Mean	SD	SEM	Median
rMSN*_PG1SD		7334	1.12056	0.17554	0.00205	1.10019							Null Hypothesis: mean1-mean2 = 0
rMSN*_novel OG		8	2.17192	0.54303	0.19199	2.19777			t Statistic	DF	Prob>|t|		Alternative Hypothesis: mean1-mean2 <> 0
	Difference		-1.05136		0.06235			Equal Variance Assumed	-16.8622	7340	1.27505e-62		At 0.05 level, when equal variance is assumed, Mean1 - Mean2 is significantly different from 0
	Overall	7342	1.12171	0.17963	0.0021	1.10061		Equal Variance NOT Assumed (Welch Correction)	-5.47577	7.0016	0.000929426		At 0.05 level, when equal variance is NOT assumed, Mean1 - Mean2 is significantly different from 0
		N	Mean	SD	SEM	Median
rNSM*_PG1SD		7334	0.98093	0.40336	0.00471	0.9538							Null Hypothesis: mean1-mean2 = 0
rNSM*novel_TSGs		21	4.64167	2.47494	0.54008	4.74265			t Statistic	DF	Prob>|t|		Alternative Hypothesis: mean1-mean2 <> 0
	Difference		-3.66074		0.09244			Equal Variance Assumed	-39.6028	7353	0		At 0.05 level, when equal variance is assumed, Mean1 - Mean2 is significantly different from 0
	Overall	7355	0.99138	0.46589	0.00543	0.95514		Equal Variance NOT Assumed (Welch Correction)	-6.77794	20.003	1.36353e-06		At 0.05 level, when equal variance is NOT assumed, Mean1 - Mean2 is significantly different from 0
rS*, rM* and rN*parameters of PGs and TEGs
		N	Mean	SD	SEM	Median
rS*_PG1SD		6020	0.92865	0.09854	0.00127	0.92959							Null Hypothesis: mean1-mean2 = 0
rS*novel TEG		18	1.47774	0.27933	0.06584	1.40558			t Statistic	DF	Prob>|t|		Alternative Hypothesis: mean1-mean2 <> 0
	Difference		-0.54909		0.02349			Equal Variance Assumed	-23.3747	6036	9.39689e-116		At 0.05 level, when equal variance is assumed, Mean1 - Mean2 is significantly different from 0
	Overall	6038	0.93029	0.10391	0.00134	0.93003		Equal Variance NOT Assumed (Welch Correction)	-8.33837	17.0127	2.05577e-07		At 0.05 level, when equal variance is NOT assumed, Mean1 - Mean2 is significantly different from 0
		N	Mean	SD	SEM	Median
rM*_PG1SD		6020	1.0269	0.0367	0.000472972	1.02709							Null Hypothesis: mean1-mean2 = 0
rM*novel TEG		18	0.82336	0.09524	0.02245	0.84602			t Statistic	DF	Prob>|t|		Alternative Hypothesis: mean1-mean2 <> 0
	Difference		0.20354		0.00873			Equal Variance Assumed	23.3091	6036	3.83682e-115		At 0.05 level, when equal variance is assumed, Mean1 - Mean2 is significantly different from 0
	Overall	6038	1.02629	0.03862	0.000496989	1.02698		Equal Variance NOT Assumed (Welch Correction)	9.06485	17.0151	6.35116e-08		At 0.05 level, when equal variance is NOT assumed, Mean1 - Mean2 is significantly different from 0
		N	Mean	SD	SEM	Median
rN*_PG1SD		6020	0.98826	0.31385	0.00405	0.97163							Null Hypothesis: mean1-mean2 = 0
rN*novel TEG		18	0.89015	0.78533	0.1851	0.61098			t Statistic	DF	Prob>|t|		Alternative Hypothesis: mean1-mean2 <> 0
	Difference		0.09811		0.07463			Equal Variance Assumed	1.31454	6036	0.18872		At 0.05 level, when equal variance is assumed, Mean1 - Mean2 is NOT significantly different from 0
	Overall	6038	0.98796	0.31618	0.00407	0.97097		Equal Variance NOT Assumed (Welch Correction)	0.52988	17.0162	0.60304		At 0.05 level, when equal variance is NOT assumed, Mean1 - Mean2 is NOT significantly different from 0
rSM*, rNM* and rNS* parameters of PGs and TEGs
		N	Mean	SD	SEM	Median
rSM*_PG1SD		7115	0.90415	0.13918	0.00165	0.89987							Null Hypothesis: mean1-mean2 = 0
rSM*novel TEG		18	1.85873	0.62433	0.14716	1.63973			t Statistic	DF	Prob>|t|		Alternative Hypothesis: mean1-mean2 <> 0
	Difference		-0.95458		0.03359			Equal Variance Assumed	-28.421	7131	2.04985e-168		At 0.05 level, when equal variance is assumed, Mean1 - Mean2 is significantly different from 0
	Overall	7133	0.90656	0.15015	0.00178	0.90026		Equal Variance NOT Assumed (Welch Correction)	-6.48644	17.0043	5.57968e-06		At 0.05 level, when equal variance is NOT assumed, Mean1 - Mean2 is significantly different from 0
		N	Mean	SD	SEM	Median
rNM*_PG1SD		7115	0.95054	0.37207	0.00441	0.92938							Null Hypothesis: mean1-mean2 = 0
rNM*novel TEG		18	1.11539	1.00195	0.23616	0.72508			t Statistic	DF	Prob>|t|		Alternative Hypothesis: mean1-mean2 <> 0
	Difference		-0.16485		0.08846			Equal Variance Assumed	-1.86352	7131	0.06243		At 0.05 level, when equal variance is assumed, Mean1 - Mean2 is NOT significantly different from 0
	Overall	7133	0.95095	0.3749	0.00444	0.92931		Equal Variance NOT Assumed (Welch Correction)	-0.69792	17.0119	0.49466		At 0.05 level, when equal variance is NOT assumed, Mean1 - Mean2 is NOT significantly different from 0
		N	Mean	SD	SEM	Median
rNS*_PG1SD		7115	1.07754	0.45843	0.00543	1.02916							Null Hypothesis: mean1-mean2 = 0
rNS*novel TEG		18	0.63522	0.61173	0.14419	0.41279			t Statistic	DF	Prob>|t|		Alternative Hypothesis: mean1-mean2 <> 0
	Difference		0.44232		0.10829			Equal Variance Assumed	4.08459	7131	4.46382e-05		At 0.05 level, when equal variance is assumed, Mean1 - Mean2 is significantly different from 0
	Overall	7133	1.07643	0.45936	0.00544	1.02841		Equal Variance NOT Assumed (Welch Correction)	3.06553	17.0483	0.00699		At 0.05 level, when equal variance is NOT assumed, Mean1 - Mean2 is significantly different from 0
rSMN*, rMSN* and rNSM* parameters of PGs and TEGs
		N	Mean	SD	SEM	Median
rSMN*_PG1SD		7334	0.90662	0.14051	0.00164	0.9026							Null Hypothesis: mean1-mean2 = 0
rSMN*novel TEG		18	1.86577	0.65538	0.15448	1.6816			t Statistic	DF	Prob>|t|		Alternative Hypothesis: mean1-mean2 <> 0
	Difference		-0.95915		0.03395			Equal Variance Assumed	-28.2546	7350	7.99045e-167		At 0.05 level, when equal variance is assumed, Mean1 - Mean2 is significantly different from 0
	Overall	7352	0.90897	0.15145	0.00177	0.90302		Equal Variance NOT Assumed (Welch Correction)	-6.20875	17.0038	9.52162e-06		At 0.05 level, when equal variance is NOT assumed, Mean1 - Mean2 is significantly different from 0
		N	Mean	SD	SEM	Median
rMSN*_PG1SD		7334	1.12056	0.17554	0.00205	1.10019							Null Hypothesis: mean1-mean2 = 0
rMSN*novel_TSG		21	0.85359	0.32247	0.07037	0.7711			t Statistic	DF	Prob>|t|		Alternative Hypothesis: mean1-mean2 <> 0
	Difference		0.26697		0.03848			Equal Variance Assumed	6.93706	7353	4.34407e-12		At 0.05 level, when equal variance is assumed, Mean1 - Mean2 is significantly different from 0
	Overall	7355	1.1198	0.17667	0.00206	1.09963		Equal Variance NOT Assumed (Welch Correction)	3.79221	20.034	0.00114		At 0.05 level, when equal variance is NOT assumed, Mean1 - Mean2 is significantly different from 0
		N	Mean	SD	SEM	Median
rNSM*_PG1SD		7334	0.98093	0.40336	0.00471	0.9538							Null Hypothesis: mean1-mean2 = 0
rNSM*novel TEG		18	0.90407	0.82674	0.19486	0.5976			t Statistic	DF	Prob>|t|		Alternative Hypothesis: mean1-mean2 <> 0
	Difference		0.07686		0.09554			Equal Variance Assumed	0.80443	7350	0.42117		At 0.05 level, when equal variance is assumed, Mean1 - Mean2 is NOT significantly different from 0
	Overall	7352	0.98074	0.40485	0.00472	0.95324		Equal Variance NOT Assumed (Welch Correction)	0.3943	17.0199	0.69826		At 0.05 level, when equal variance is NOT assumed, Mean1 - Mean2 is NOT significantly different from 0
