# Supplementary material for: Use of signals of positive and negative selection to distinguish cancer genes and passenger genes
Source: eLife. 2021 Jan 11;10:e59629. doi: 10.7554/eLife.59629 (PMC7877913; doi:10.7554/eLife.59629)
Supplement: Supplementary file 33. — Transcripts of OGs (oncogenes) and TSGs (tumor suppressor genes) of the cancer gene list of Vogelstein et al., 2013 are highlighted by brick red and blue backgrounds, respectively. [file elife-59629-supp33.xlsx]

## Sheet: Supplementary file 33
Gene symbol	rS**	rM**	rN**	rSM**	rNM**	rNS**	rSMN**	rMSN**	rNSM**
A1CF	1.09446	0.96415	0.928545	1.13516	0.963071	0.848403	1.13747	0.897401	0.925834
A2M	1.07728	1.00731	0.306464	1.06947	0.304241	0.28448	1.111	1.02315	0.298166
A2ML1	1.05817	0.989971	0.757327	1.06889	0.764999	0.715694	1.08316	0.969686	0.749721
A4GALT	1.26945	0.89853	0.822252	1.41281	0.915108	0.647721	1.41784	0.732875	0.817744
AAAS	1.0755	0.9848	0.695941	1.0921	0.706683	0.647084	1.10948	0.954866	0.687685
AACS	1.04858	0.99538	0.686781	1.05344	0.689969	0.654965	1.06871	0.985374	0.679472
AADAC	1.03756	1.00135	0.729422	1.03616	0.728438	0.703019	1.05215	1.00436	0.721107
AADACL2	1.05124	0.964329	1.28432	1.09012	1.33183	1.22172	1.07003	0.889395	1.30059
AADACL4	0.805854	1.10092	0.652462	0.731983	0.592652	0.809653	0.744752	1.39012	0.645621
AAK1	1.19711	0.96687	0.278967	1.23812	0.288526	0.233035	1.29745	0.905402	0.269562
AARS2	0.975918	1.0135	0.93847	0.962917	0.925968	0.961628	0.96642	1.0428	0.936394
AASDH	1.02781	1.0049	0.765054	1.0228	0.761326	0.744356	1.03777	1.01642	0.75669
AASS	1.01832	1.00177	0.820755	1.01652	0.819305	0.805986	1.02535	1.00579	0.815506
AATK	1.30428	0.899644	0.482022	1.44977	0.535793	0.36957	1.47486	0.73024	0.475307
ABAT	1.17555	0.943438	0.599952	1.24603	0.635921	0.510358	1.26575	0.841867	0.59251
ABCA1	1.14889	0.963322	0.519635	1.19264	0.53942	0.452291	1.22087	0.893556	0.510485
ABCA10	0.999022	1.00655	0.903492	0.992518	0.89761	0.904376	0.998676	1.02173	0.899453
ABCA12	1.09202	0.989031	0.541749	1.10413	0.547757	0.496098	1.13175	0.966014	0.53184
ABCA13	0.982419	1.0215	0.773128	0.961744	0.756858	0.786964	0.97612	1.07213	0.765081
ABCA2	1.4237	0.854872	0.297086	1.6654	0.347521	0.208672	1.70976	0.647325	0.291082
ABCA3	1.18304	0.941757	0.565638	1.2562	0.600619	0.478124	1.27695	0.83617	0.558389
ABCA4	0.95511	1.01354	1.11208	0.942347	1.09722	1.16435	0.937837	1.04275	1.11663
ABCA5	1.01006	1.01742	0.678059	0.992769	0.66645	0.671304	1.01352	1.06071	0.667731
ABCA6	0.910518	1.05432	0.703496	0.863608	0.667252	0.772633	0.881431	1.19642	0.693937
ABCA7	1.09268	0.960812	0.980305	1.13725	1.02029	0.897157	1.13636	0.887071	0.979765
ABCA8	0.950538	1.02742	0.878349	0.925174	0.854912	0.924055	0.933042	1.0919	0.873673
ABCA9	1.02097	0.994924	0.950308	1.02618	0.955156	0.930789	1.02905	0.984203	0.948071
ABCB1	1.06656	0.99562	0.580273	1.07125	0.582826	0.544059	1.09496	0.986343	0.570975
ABCB10	1.11384	0.952162	0.903598	1.1698	0.948996	0.811249	1.1723	0.869149	0.900996
ABCB11	1.08716	0.984163	0.680328	1.10465	0.691275	0.625784	1.12407	0.95129	0.671239
ABCB4	1.0832	0.983173	0.691328	1.10174	0.70316	0.638229	1.12021	0.94983	0.682603
ABCB5	0.941478	1.02509	0.974442	0.918436	0.950594	1.03501	0.92102	1.08387	0.973374
ABCB6	1.10003	0.970464	0.740257	1.13351	0.762786	0.672943	1.14747	0.915263	0.733087
ABCB7	1.4001	0.89063	0.106819	1.57204	0.119936	0.0762934	1.65051	0.718931	0.103066
ABCB8	1.05792	0.982937	0.823791	1.07628	0.838091	0.77869	1.08306	0.947566	0.819693
ABCB9	1.14216	0.95497	0.661603	1.19601	0.692799	0.579257	1.21069	0.869087	0.655162
ABCC1	1.30214	0.903381	0.363311	1.44141	0.402169	0.279011	1.48353	0.750603	0.355394
ABCC10	1.03762	0.99395	0.769602	1.04394	0.774287	0.7417	1.0551	0.982323	0.763683
ABCC11	0.979137	1.02139	0.743798	0.95863	0.72822	0.759647	0.970939	1.06972	0.73731
ABCC12	1.01103	0.992033	1.06893	1.01915	1.07752	1.05727	1.01543	0.975215	1.07153
ABCC2	0.938264	1.03387	0.865253	0.907525	0.836906	0.922185	0.915488	1.11201	0.86067
ABCC3	0.990348	1.02149	0.628835	0.969511	0.615605	0.634964	0.986387	1.06917	0.62135
ABCC4	1.20843	0.955477	0.383403	1.26474	0.401269	0.317274	1.31337	0.873517	0.372651
ABCC5	1.28022	0.899578	0.640644	1.42313	0.712161	0.500418	1.4425	0.74122	0.632815
ABCC6	1.05317	0.972542	1.0943	1.0829	1.1252	1.03905	1.07642	0.919642	1.09797
ABCC8	1.17847	0.932988	0.762251	1.26311	0.816999	0.646814	1.27307	0.818608	0.756654
ABCC9	1.37284	0.879458	0.540933	1.561	0.615075	0.394026	1.5941	0.693819	0.53096
ABCD1	1.17078	0.942156	0.728802	1.24265	0.773547	0.622495	1.25552	0.837186	0.722239
ABCD2	1.23657	0.927919	0.655561	1.33262	0.706486	0.530147	1.3559	0.801558	0.645661
ABCD3	1.14388	0.98088	0.436327	1.16617	0.444832	0.381446	1.2094	0.942641	0.424583
ABCD4	1.17921	0.932161	0.843936	1.26503	0.905355	0.715677	1.27108	0.816221	0.839069
ABCE1	1.49393	0.830134	0.558539	1.79963	0.67283	0.373872	1.83249	0.604013	0.548477
ABCF1	1.12073	0.962849	0.776752	1.16398	0.806722	0.693075	1.17769	0.895042	0.769034
ABCF2	1.41243	0.844212	0.659449	1.67307	0.781142	0.46689	1.69167	0.635467	0.651201
ABCF3	1.10758	0.974584	0.562157	1.13646	0.576818	0.507554	1.15943	0.926069	0.553867
ABCG1	1.23007	0.912608	0.78233	1.34787	0.857247	0.636003	1.35523	0.766051	0.777608
ABCG2	0.903798	1.04432	0.945674	0.865446	0.905545	1.04633	0.86971	1.14945	0.943711
ABCG4	1.27819	0.887436	0.807767	1.44032	0.910225	0.63196	1.44498	0.715256	0.803744
ABCG5	1.01618	1.01004	0.609375	1.00608	0.603318	0.599671	1.02304	1.0318	0.602212
ABCG8	0.92693	1.03317	0.958695	0.897173	0.927918	1.03427	0.90004	1.1109	0.957415
ABHD16A	1.26177	0.916694	0.468796	1.37643	0.511398	0.37154	1.41226	0.782124	0.459444
ABHD2	1.47064	0.826787	0.546102	1.77874	0.660511	0.371336	1.80934	0.604498	0.537091
ABHD8	1.40225	0.859267	0.145577	1.63191	0.16942	0.103817	1.68011	0.65851	0.142522
ABI3	0.996602	1.00945	0.790201	0.987273	0.782804	0.792895	0.995161	1.02971	0.785871
ABI3BP	0.989548	1.02763	0.611297	0.962939	0.594859	0.617754	0.985554	1.09167	0.601352
ABL1	1.30028	0.910614	0.150668	1.42792	0.165457	0.115873	1.48024	0.764314	0.146793
ABL2	1.14198	0.968247	0.471903	1.17943	0.487379	0.413234	1.21078	0.907548	0.462757
ABLIM1	1.07585	1.00205	0.368584	1.07365	0.36783	0.342599	1.10796	1.0066	0.360225
ABLIM2	1.24489	0.927829	0.475743	1.34172	0.512749	0.382158	1.37364	0.800082	0.466997
ABLIM3	0.972595	1.04498	0.423239	0.930731	0.405022	0.435165	0.96243	1.15646	0.413318
ABR	1.35963	0.875549	0.454115	1.55288	0.518663	0.334	1.58671	0.689988	0.446146
ABRA	1.07822	0.987692	0.713611	1.09166	0.722503	0.661839	1.10978	0.961331	0.70451
ABTB1	1.16379	0.936914	0.894989	1.24215	0.955252	0.76903	1.24432	0.822122	0.892292
ABTB2	1.15585	0.951069	0.667357	1.21531	0.701691	0.577374	1.22963	0.856139	0.660981
ACACB	1.11666	0.965432	0.697451	1.15664	0.722424	0.624589	1.17106	0.898377	0.690605
ACAD10	0.994243	1.00075	1.03147	0.993496	1.0307	1.03745	0.991953	1.00234	1.03269
ACAD11	1.03518	1.00475	0.724878	1.03029	0.721449	0.700242	1.04917	1.01492	0.715204
ACAD9	1.00149	1.01278	0.666228	0.988858	0.657824	0.665236	1.0021	1.0413	0.660022
ACADS	1.07609	0.974763	0.863068	1.10396	0.885413	0.802037	1.10912	0.923033	0.859524
ACAN	1.04928	1.00506	0.387344	1.044	0.385395	0.369154	1.07051	1.0162	0.380449
ACAP1	1.093	0.978613	0.60255	1.11689	0.615719	0.551282	1.13629	0.936464	0.594856
ACAP2	1.28209	0.939562	0.406521	1.36457	0.432671	0.317076	1.41917	0.826102	0.394078
ACAP3	1.31293	0.899236	0.487215	1.46005	0.54181	0.37109	1.48805	0.730114	0.479649
ACBD3	1.26297	0.978041	0.23399	1.29132	0.239244	0.18527	1.3923	0.936563	0.221152
ACBD5	1.25856	0.956306	0.358909	1.31607	0.375308	0.285173	1.37478	0.867027	0.34683
ACCS	1.06526	0.982737	0.818767	1.08398	0.83315	0.768605	1.09294	0.947167	0.813357
ACCSL	1.04143	0.976416	1.12637	1.06658	1.15358	1.08157	1.05885	0.929464	1.13141
ACD	1.09272	0.983841	0.466266	1.11067	0.473924	0.426701	1.13542	0.95089	0.458828
ACE	1.18476	0.937579	0.776027	1.26364	0.827693	0.655006	1.27606	0.827701	0.768723
ACE2	1.07677	1.02219	0.295227	1.05339	0.288818	0.274179	1.1068	1.07497	0.28464
ACHE	1.33294	0.886542	0.339645	1.50353	0.383112	0.254809	1.54463	0.715684	0.332721
ACIN1	1.20355	0.965764	0.236279	1.24622	0.244655	0.196318	1.30275	0.898573	0.228659
ACKR3	1.50278	0.822271	0.207948	1.8276	0.252895	0.138376	1.88781	0.59607	0.202914
ACLY	1.20463	0.927086	0.681348	1.29937	0.734936	0.565608	1.31331	0.800935	0.675038
ACMSD	1.07624	0.982518	0.777843	1.09539	0.791683	0.722744	1.10813	0.946397	0.770694
ACO1	0.97809	1.02125	0.765543	0.95774	0.749615	0.782691	0.969364	1.06836	0.759287
ACO2	1.5406	0.788768	0.342316	1.95318	0.433988	0.222196	1.99942	0.54952	0.335793
ACOT11	0.973209	1.00542	1.11269	0.967965	1.1067	1.14332	0.963179	1.01749	1.11706
ACOT12	1.03669	1.01031	0.526742	1.02611	0.521369	0.508101	1.05046	1.03532	0.517677
ACOX1	1.251	0.910921	0.74004	1.37334	0.812408	0.591557	1.386	0.762888	0.733112
ACOX2	1.07304	0.980994	0.804409	1.09383	0.819993	0.749653	1.1049	0.943402	0.797922
ACOX3	1.01344	1.00844	0.709222	1.00496	0.703287	0.699819	1.01909	1.0264	0.702236
ACOXL	1.0229	0.992815	0.95001	1.0303	0.956885	0.928744	1.03245	0.978038	0.948319
ACRBP	1.09871	0.972379	0.836236	1.12992	0.85999	0.761109	1.14016	0.917542	0.829552
ACSBG1	1.257	0.918448	0.581741	1.36861	0.633396	0.462801	1.39589	0.781465	0.572178
ACSBG2	0.968919	1.03387	0.6348	0.937172	0.614001	0.655163	0.95688	1.11169	0.625777
ACSF2	1.14373	0.954306	0.686274	1.1985	0.719134	0.60003	1.21406	0.869771	0.679109
ACSF3	1.06372	0.981261	0.850559	1.08403	0.866803	0.799611	1.0908	0.942663	0.846171
ACSL1	1.21284	0.930344	0.692371	1.30365	0.74421	0.570868	1.32161	0.809015	0.683989
ACSL3	1.27019	0.933271	0.335316	1.36101	0.359292	0.263988	1.41377	0.815256	0.325745
ACSL4	1.27614	0.927359	0.289363	1.3761	0.312029	0.226749	1.42544	0.799045	0.281783
ACSL5	1.01884	1.02549	0.414674	0.993514	0.404367	0.407007	1.02677	1.0816	0.405162
ACSL6	1.18554	0.948476	0.518995	1.24994	0.547189	0.437773	1.2803	0.855882	0.509464
ACSM1	0.990582	0.995639	1.13046	0.994921	1.13541	1.14121	0.986907	0.986755	1.13712
ACSM2A	0.911828	1.03424	1.04005	0.881643	1.00562	1.14063	0.881352	1.11383	1.04189
ACSM2B	0.963347	1.0125	1.04579	0.951451	1.03287	1.08558	0.949603	1.03943	1.04792
ACSM3	0.906575	1.06983	0.514116	0.8474	0.480558	0.567097	0.876004	1.25856	0.502408
ACSM4	1.602	0.771733	0.84452	2.07585	1.09432	0.527166	2.06396	0.516172	0.838444
ACSM5	1.05068	0.990983	0.773522	1.06024	0.780561	0.736208	1.07231	0.97246	0.76691
ACSS1	1.27811	0.883913	0.970514	1.44597	1.09798	0.759333	1.44022	0.707144	0.96966
ACSS2	0.944448	1.0389	0.707351	0.909083	0.680865	0.748958	0.924521	1.13384	0.699334
ACSS3	1.00531	1.02275	0.570296	0.982942	0.557608	0.567285	1.00739	1.07472	0.5604
ACTA1	1.92404	0.618242	1.06827	3.11211	1.72792	0.555224	3.02868	0.334335	1.07031
ACTB	2.42584	0.45642	0.18142	5.31492	0.397485	0.0747867	5.4292	0.203719	0.177665
ACTBL2	0.889987	1.0213	1.56188	0.871426	1.52931	1.75495	0.853122	1.07185	1.58864
ACTC1	1.90086	0.653951	0.345782	2.90674	0.528758	0.181908	2.96043	0.37082	0.339491
ACTG1	2.25226	0.517703	0.548372	4.3505	1.05924	0.243476	4.34025	0.24745	0.541128
ACTG2	1.68133	0.741126	0.561458	2.26862	0.757574	0.333936	2.2901	0.468976	0.554497
ACTL6B	1.65641	0.721627	1.17434	2.29538	1.62735	0.708966	2.23119	0.449339	1.18135
ACTL7A	1.0583	0.987607	0.779327	1.07158	0.789107	0.736398	1.08275	0.961635	0.773089
ACTL7B	1.20815	0.921702	0.884539	1.31078	0.959681	0.732142	1.31271	0.781105	0.881782
ACTL8	1.36644	0.886335	0.306266	1.54168	0.345543	0.224134	1.59185	0.709659	0.298807
ACTL9	1.01147	1.0024	0.82639	1.00905	0.824408	0.817016	1.01615	1.00768	0.822216
ACTN1	1.23079	0.94237	0.318651	1.30606	0.338138	0.258898	1.35097	0.837184	0.310688
ACTN2	1.2408	0.941194	0.39748	1.31832	0.422314	0.320342	1.36656	0.836955	0.386702
ACTN4	1.52003	0.835903	0.193869	1.81843	0.231928	0.127543	1.88835	0.610599	0.188352
ACTR1B	0.937679	1.04996	0.469971	0.893062	0.447609	0.501207	0.914338	1.17437	0.462421
ACTR5	1.08491	0.990366	0.555403	1.09547	0.560806	0.511933	1.12283	0.970872	0.545379
ACTR8	1.05485	0.997483	0.72155	1.05751	0.723371	0.684033	1.07679	0.99213	0.711735
ACTRT1	0.900733	1.06132	0.552097	0.848688	0.520197	0.612942	0.866753	1.22528	0.544262
ACTRT2	1.2278	0.918936	0.717965	1.33611	0.7813	0.584757	1.34808	0.778812	0.711932
ACVR1	1.38748	0.871512	0.655817	1.59204	0.752506	0.472669	1.61458	0.676074	0.646216
ACVR1B	1.55745	0.813044	0.309918	1.91558	0.381182	0.19899	1.97608	0.5751	0.302164
ACVR1C	1.26067	0.917577	0.683114	1.37391	0.744475	0.541867	1.3952	0.777364	0.673385
ACVR2A	1.57404	0.844966	0.0659072	1.86284	0.0779999	0.0418714	1.96974	0.622714	0.0632153
ACVR2B	1.37449	0.885406	0.278184	1.55239	0.314187	0.20239	1.60704	0.708439	0.270929
ACVRL1	1.15667	0.924893	1.23247	1.2506	1.33255	1.06553	1.2322	0.79426	1.2421
ADAD1	1.0808	1.01188	0.422153	1.06812	0.417198	0.390592	1.11233	1.03934	0.409568
ADAD2	1.14808	0.941528	0.858348	1.21938	0.911653	0.747634	1.22405	0.839859	0.854554
ADAM10	1.41227	0.897255	0.204543	1.57399	0.227965	0.144832	1.64642	0.722974	0.19759
ADAM11	1.29098	0.890782	0.739735	1.44927	0.830433	0.573003	1.45993	0.720065	0.73366
ADAM12	1.14948	0.969089	0.389786	1.18614	0.402219	0.339099	1.22075	0.908054	0.381564
ADAM15	1.04626	0.978383	1.02987	1.06938	1.05263	0.984335	1.06694	0.936499	1.03085
ADAM17	1.27438	0.937685	0.310401	1.35907	0.331029	0.24357	1.41038	0.818789	0.301679
ADAM18	1.06021	0.985917	0.896179	1.07535	0.908979	0.845284	1.08171	0.954065	0.891459
ADAM19	1.09829	0.978613	0.611738	1.12229	0.625107	0.55699	1.14257	0.935457	0.603503
ADAM2	1.02562	1.01441	0.682007	1.01105	0.672317	0.664968	1.03402	1.05111	0.670437
ADAM20	0.953087	1.0347	0.72471	0.921129	0.700409	0.760381	0.937571	1.12395	0.715797
ADAM21	1.19773	0.939213	0.774863	1.27525	0.825013	0.646944	1.28806	0.824371	0.767296
ADAM22	1.1798	0.958418	0.557089	1.23099	0.581259	0.472188	1.26059	0.875144	0.546649
ADAM23	1.11501	0.995363	0.319742	1.1202	0.321232	0.286763	1.16441	0.985209	0.310738
ADAM28	1.0137	1.00585	0.800428	1.0078	0.79577	0.789611	1.01848	1.02022	0.794126
ADAM29	1.03001	1.00985	0.654819	1.01997	0.648433	0.635741	1.04082	1.03366	0.644976
ADAM30	1.11537	1.00024	0.442943	1.1151	0.442837	0.397129	1.16165	1.00078	0.429432
ADAM32	1.03102	1.01624	0.650804	1.01454	0.640402	0.631226	1.04174	1.05553	0.637958
ADAM33	1.18891	0.922621	1.06414	1.28863	1.15339	0.895055	1.28002	0.784597	1.06639
ADAM7	0.952905	1.03661	0.695699	0.919249	0.671127	0.730082	0.936978	1.12977	0.686478
ADAM9	1.12851	0.985523	0.381484	1.14509	0.387088	0.338042	1.18515	0.954932	0.371852
ADAMTS1	1.13138	0.985317	0.307627	1.14824	0.312211	0.271904	1.18976	0.953972	0.299669
ADAMTS10	1.39962	0.865861	0.473531	1.61645	0.546891	0.338328	1.64915	0.664173	0.465497
ADAMTS12	1.05587	0.991557	0.777063	1.06486	0.78368	0.735949	1.07785	0.973117	0.769762
ADAMTS13	1.04137	0.99559	0.748117	1.04599	0.751432	0.718395	1.05817	0.985946	0.741647
ADAMTS14	1.0982	0.973344	0.74247	1.12828	0.762803	0.676078	1.14092	0.918799	0.735835
ADAMTS15	1.16384	0.954618	0.514092	1.21917	0.538532	0.441719	1.24305	0.867031	0.506488
ADAMTS16	1.11786	0.984078	0.475473	1.13595	0.483166	0.42534	1.1693	0.950696	0.465255
ADAMTS17	1.25584	0.918921	0.641167	1.36665	0.69774	0.510547	1.38787	0.777279	0.632477
ADAMTS18	1.08194	0.994823	0.603986	1.08757	0.607129	0.558242	1.11682	0.984202	0.592096
ADAMTS19	1.16233	0.956758	0.706867	1.21486	0.738815	0.608148	1.23449	0.872592	0.697288
ADAMTS2	1.28159	0.919251	0.3589	1.39417	0.390427	0.280042	1.4302	0.773353	0.351877
ADAMTS20	0.962186	1.03834	0.672618	0.926662	0.647785	0.699052	0.950294	1.13944	0.660504
ADAMTS3	0.977128	1.03794	0.516478	0.94141	0.497599	0.528568	0.969196	1.1359	0.50575
ADAMTS4	1.27833	0.893195	0.663271	1.43119	0.742583	0.518857	1.44731	0.73163	0.656324
ADAMTS5	1.14065	0.962903	0.588857	1.1846	0.611543	0.516245	1.20762	0.891936	0.580154
ADAMTS7	1.24012	0.92065	0.655276	1.34701	0.711754	0.528397	1.36462	0.781239	0.647785
ADAMTS8	1.15521	0.945281	0.829039	1.22208	0.877029	0.717655	1.22847	0.841853	0.824595
ADAMTS9	1.22161	0.964511	0.272954	1.26656	0.282997	0.223438	1.32535	0.892889	0.263767
ADAMTSL1	1.12349	0.980327	0.451497	1.14604	0.460558	0.40187	1.17973	0.940415	0.441871
ADAMTSL2	1.43476	0.856842	0.633677	1.67448	0.73955	0.44166	1.69481	0.638353	0.625599
ADAMTSL3	1.04487	1.01083	0.576638	1.03368	0.570461	0.551873	1.06204	1.03572	0.565179
ADAMTSL4	1.03934	0.983097	1.01031	1.05721	1.02768	0.97207	1.05572	0.948915	1.0107
ADAR	1.24755	0.924673	0.549547	1.34918	0.594315	0.440502	1.38097	0.797861	0.539211
ADARB1	1.29432	0.904348	0.317265	1.43122	0.350822	0.245121	1.47041	0.750644	0.310884
ADARB2	1.35276	0.889868	0.196078	1.52018	0.220344	0.144946	1.56099	0.707061	0.192224
ADAT1	0.94137	1.03327	0.853181	0.91106	0.82571	0.906319	0.920731	1.1118	0.847509
ADCK1	0.964924	1.0045	1.21296	0.960604	1.20752	1.25705	0.951481	1.01419	1.22182
ADCK2	1.03232	0.999957	0.670674	1.03236	0.670703	0.649677	1.04619	0.999865	0.664267
ADCK5	1.40696	0.856717	0.521824	1.64226	0.609097	0.370889	1.66684	0.645298	0.514922
ADCY1	1.50211	0.815129	0.337497	1.84278	0.414041	0.224683	1.88451	0.581188	0.331424
ADCY10	1.05809	0.990912	0.786094	1.0678	0.793303	0.742935	1.08193	0.972203	0.778102
ADCY2	1.41196	0.872656	0.0959186	1.618	0.109916	0.067933	1.68857	0.685525	0.0929959
ADCY3	1.08458	0.984198	0.539898	1.102	0.548566	0.497792	1.12241	0.95131	0.532629
ADCY4	1.11147	0.952097	0.97732	1.16739	1.02649	0.879306	1.16607	0.866254	0.976634
ADCY5	1.17652	0.797896	4.55496	1.47453	5.70871	3.87156	1.26301	0.546412	5.02474
ADCY6	1.14343	0.960978	0.458601	1.18986	0.477223	0.401076	1.21397	0.885928	0.451803
ADCY7	1.30508	0.895051	0.486887	1.4581	0.543977	0.373071	1.48354	0.725411	0.480061
ADCY8	1.19662	0.94594	0.402055	1.26501	0.425033	0.335993	1.30039	0.849405	0.393852
ADCY9	1.32041	0.90258	0.267136	1.46292	0.295969	0.202313	1.50731	0.741234	0.261184
ADCYAP1R1	1.23467	0.914048	0.8304	1.35077	0.908486	0.672571	1.3573	0.770652	0.824876
ADD1	1.02569	1.024	0.270381	1.00165	0.264044	0.263609	1.03617	1.08038	0.263917
ADD2	1.32981	0.900386	0.37135	1.47693	0.412434	0.279251	1.51761	0.734461	0.36351
ADD3	1.06667	1.02846	0.153386	1.03715	0.149142	0.143799	1.09319	1.09768	0.147611
ADGB	0.958257	1.043	0.615883	0.918753	0.590494	0.642712	0.944179	1.15245	0.604068
ADH1A	1.00622	1.01695	0.468062	0.989439	0.460258	0.465171	1.00871	1.05679	0.461684
ADH1B	1.04872	0.984624	0.843275	1.0651	0.856443	0.804096	1.06997	0.952334	0.840243
ADH6	0.939302	1.02881	0.92854	0.912995	0.902534	0.988543	0.916836	1.09651	0.926449
ADH7	0.926292	1.04088	0.686323	0.889913	0.659369	0.740936	0.901181	1.15007	0.680482
ADHFE1	0.953931	1.04321	0.433153	0.914415	0.41521	0.454072	0.936034	1.14806	0.426216
ADNP	3.66987	0	0.972959			0.265121	64.1868	0	0.971766
ADNP2	3.45378	0	0.672168			0.194618	113.874	0	0.664882
ADORA1	1.19557	0.933642	0.404	1.28055	0.432714	0.337914	1.30668	0.821719	0.398025
ADORA2A	1.17875	0.952331	0.28142	1.23775	0.295507	0.238745	1.27487	0.8668	0.275494
ADRA1A	1.04877	0.980563	0.977174	1.06956	0.996544	0.931731	1.06972	0.941244	0.97646
ADRA1B	1.12392	0.957766	0.685956	1.17348	0.716204	0.610325	1.18475	0.87777	0.680765
ADRA1D	1.16053	0.93215	1.16093	1.24501	1.24544	1.00035	1.23595	0.803189	1.16508
ADRA2A	1.26967	0.901399	0.700478	1.40856	0.7771	0.551699	1.41964	0.737064	0.695103
ADRB2	1.29665	0.886196	0.89523	1.46316	1.01019	0.690417	1.46243	0.708618	0.891758
ADSL	0.969033	1.01351	0.977716	0.956117	0.964684	1.00896	0.95778	1.04482	0.976912
AEBP1	1.10752	0.976629	0.599659	1.13402	0.614009	0.541445	1.15555	0.929103	0.591125
AFAP1	1.14551	0.964713	0.476374	1.18741	0.493799	0.415863	1.21616	0.897049	0.467914
AFAP1L1	1.07616	0.973444	0.902281	1.10552	0.926896	0.838429	1.10942	0.920758	0.899139
AFAP1L2	1.18502	0.940522	0.672942	1.25996	0.715499	0.567876	1.27728	0.832837	0.665218
AFF2	1.12593	0.994907	0.141775	1.1317	0.1425	0.125917	1.18259	0.983855	0.137328
AFF3	1.21288	0.957108	0.195992	1.26724	0.204776	0.161592	1.31773	0.872676	0.190426
AFF4	1.20265	0.978086	0.0711048	1.22959	0.0726978	0.0591236	1.297	0.931653	0.0683727
AFG3L2	1.14355	0.954187	0.740981	1.19846	0.776557	0.647964	1.2132	0.871124	0.733302
AFM	0.98303	1.00822	0.967258	0.975011	0.959368	0.983956	0.97728	1.02796	0.965857
AFP	1.08805	0.999851	0.553795	1.08821	0.553877	0.508979	1.12365	0.999531	0.540569
AFTPH	1.05677	1.02306	0.205479	1.03295	0.200847	0.19444	1.07721	1.0846	0.199137
AGAP1	1.24994	0.93138	0.316219	1.34203	0.339517	0.252988	1.38365	0.808812	0.309042
AGAP2	1.10945	0.800635	4.87824	1.38572	6.09296	4.39697	1.16271	0.563591	5.45524
AGAP3	1.3666	0.877832	0.336564	1.55679	0.383404	0.246279	1.59699	0.691319	0.329958
AGAP5	1.07969	0.981835	0.757365	1.09967	0.771377	0.701464	1.11191	0.942271	0.750696
AGAP6	1.00281	1.0091	0.801237	0.993773	0.794013	0.798988	1.00384	1.03083	0.795378
AGBL1	1.05519	0.978491	0.98502	1.07838	1.00667	0.9335	1.07804	0.934267	0.984485
AGBL2	0.991794	1.01012	0.90166	0.981855	0.892624	0.90912	0.988702	1.03206	0.897337
AGBL3	1.06924	0.997244	0.67132	1.07219	0.673176	0.627849	1.09574	0.991097	0.660203
AGBL4	1.02985	1.01951	0.510364	1.01014	0.500596	0.49557	1.04182	1.06324	0.499125
AGBL5	1.08107	0.988362	0.501747	1.0938	0.507655	0.46412	1.11828	0.964776	0.493739
AGFG2	1.10681	0.96721	0.634081	1.14433	0.655577	0.572892	1.15891	0.904735	0.628016
AGGF1	1.16765	0.982976	0.367891	1.18787	0.374263	0.31507	1.23708	0.945153	0.356618
AGK	1.07239	0.978359	0.88825	1.09611	0.907897	0.828292	1.10222	0.934569	0.883726
AGL	0.997418	1.02703	0.689337	0.97117	0.671197	0.691122	0.996548	1.09264	0.676423
AGMO	0.977247	1.03414	0.654844	0.944987	0.633227	0.67009	0.969313	1.11711	0.643083
AGPAT4	1.30439	0.90105	0.482486	1.44763	0.535471	0.369894	1.4852	0.747202	0.472588
AGPS	1.49284	0.848283	0.320411	1.75983	0.377717	0.214632	1.82345	0.634094	0.311367
AGRN	1.30985	0.900118	0.304201	1.4552	0.337957	0.232241	1.49023	0.734157	0.298754
AGT	1.16972	0.92762	0.930008	1.261	1.00257	0.795066	1.26087	0.807251	0.928129
AGTPBP1	1.17901	0.966288	0.428556	1.22014	0.443507	0.363489	1.25926	0.896965	0.418293
AGTR1	1.06922	0.9868	0.68985	1.08352	0.699078	0.645191	1.09986	0.960136	0.682132
AGTR2	0.977786	1.03271	0.588374	0.946816	0.569739	0.601741	0.969671	1.11241	0.578506
AGXT	0.981973	0.980473	1.65341	1.00153	1.68634	1.68377	0.974909	0.940548	1.68558
AGXT2	0.959896	1.01413	1.03358	0.946519	1.01918	1.07676	0.945618	1.04713	1.03488
AHCTF1	1.08306	1.04965	0.0839095	1.03183	0.0799405	0.0774743	1.11454	1.17739	0.0792593
AHCY	1.24918	0.909047	0.723794	1.37416	0.796212	0.579416	1.38471	0.75531	0.718325
AHCYL2	1.30517	0.908133	0.40629	1.43721	0.44739	0.311291	1.48051	0.758484	0.396948
AHDC1	1.19914	0.928655	0.462651	1.29127	0.498195	0.385819	1.31347	0.810026	0.456761
AHI1	1.01028	1.00588	0.856342	1.00438	0.851338	0.847628	1.01376	1.02007	0.850361
AHNAK	1.00085	1.02422	0.211545	0.977181	0.206543	0.211366	1.00118	1.08419	0.207915
AHNAK2	1.18853	0.948033	0.425348	1.25368	0.448663	0.357877	1.27846	0.844341	0.41902
AHR	1.1739	0.990087	0.209008	1.18566	0.2111	0.178045	1.2519	0.969018	0.200758
AHSG	0.959681	1.04401	0.47063	0.919226	0.450791	0.490403	0.944183	1.14981	0.46197
AICDA	1.21183	0.903962	1.12533	1.34058	1.24489	0.928617	1.32132	0.753044	1.13167
AIFM1	1.20552	0.962204	0.147672	1.25287	0.153473	0.122497	1.31371	0.892206	0.142728
AIFM3	1.16367	0.932152	0.973032	1.24837	1.04386	0.836175	1.24631	0.812376	0.972309
AIM2	1.02964	0.994784	0.88717	1.03504	0.891822	0.861631	1.04111	0.983386	0.883092
AIPL1	1.1461	0.944809	0.893525	1.21305	0.94572	0.779622	1.21611	0.843969	0.89026
AIRE	1.07857	0.963195	1.10418	1.11979	1.14637	1.02374	1.11394	0.891302	1.1072
AJAP1	1.23229	0.943309	0.122387	1.30635	0.129742	0.0993165	1.35308	0.835969	0.119297
AK5	1.31279	0.919157	0.314553	1.42825	0.342219	0.239607	1.48977	0.784803	0.304601
AK7	0.963912	1.02456	0.83046	0.940809	0.810555	0.861551	0.951141	1.08294	0.824364
AK8	1.13547	0.949798	0.859508	1.19548	0.904937	0.756962	1.20098	0.858769	0.855237
AKAP1	1.11091	0.984684	0.382887	1.12819	0.388842	0.34466	1.16234	0.953582	0.374659
AKAP11	1.13274	1.00261	0.180718	1.12979	0.180248	0.159541	1.1856	1.00891	0.174304
AKAP12	1.14999	0.994796	0.197045	1.15601	0.198075	0.171345	1.21345	0.982991	0.190059
AKAP13	1.05256	1.01889	0.269326	1.03304	0.264332	0.255878	1.07336	1.06435	0.26191
AKAP17A	1.30558	0.91173	0.3265	1.43198	0.358111	0.250081	1.47087	0.755394	0.319812
AKAP3	0.986457	1.03032	0.53522	0.957427	0.519469	0.542568	0.981466	1.10487	0.525816
AKAP4	1.12094	1.00532	0.15889	1.11501	0.158049	0.141746	1.17199	1.01752	0.153177
AKAP6	1.05577	1.02988	0.191725	1.02514	0.186163	0.181598	1.07634	1.10755	0.184922
AKAP8	1.12325	0.987489	0.241375	1.13748	0.244433	0.214889	1.17819	0.960449	0.235251
AKAP8L	1.26112	0.93752	0.340565	1.34516	0.363262	0.270051	1.38923	0.817146	0.332191
AKAP9	1.10316	1.02325	0.384572	1.0781	0.375832	0.348608	1.13971	1.08102	0.368525
AKNA	1.01965	1.0262	0.314847	0.993614	0.306808	0.30878	1.02768	1.08703	0.307387
AKNAD1	0.954942	1.04586	0.646374	0.913068	0.618031	0.676873	0.940635	1.16492	0.632758
AKR1D1	1.02406	1.00723	0.722166	1.01672	0.716985	0.705197	1.03389	1.02255	0.713459
AKT1	1.74897	0.745471	0.184862	2.34613	0.24798	0.105698	2.42854	0.471692	0.179882
AKT2	1.47736	0.830711	0.568715	1.77843	0.684612	0.384952	1.80111	0.597523	0.561481
AKT3	1.82541	0.75942	0.260575	2.40369	0.343124	0.142749	2.51325	0.485426	0.250846
ALAS1	1.17528	0.955179	0.462221	1.23043	0.48391	0.393285	1.26038	0.869014	0.45383
ALAS2	1.34321	0.892109	0.143727	1.50566	0.161109	0.107002	1.5601	0.724409	0.140067
ALB	1.28955	0.921286	0.46738	1.39972	0.507313	0.362438	1.43784	0.779655	0.457318
ALCAM	1.22394	0.95884	0.205905	1.27648	0.214743	0.168231	1.33425	0.878337	0.199265
ALDH16A1	1.06906	0.984695	0.690709	1.08567	0.701445	0.646093	1.1003	0.954086	0.683816
ALDH18A1	1.1146	0.964773	0.732867	1.15529	0.759626	0.657517	1.16769	0.896321	0.726532
ALDH1A1	1.29139	0.927254	0.203994	1.39271	0.219998	0.157964	1.45502	0.802146	0.197509
ALDH1A2	1.19215	0.954386	0.340852	1.24912	0.357143	0.285915	1.29076	0.870194	0.332686
ALDH1A3	1.30081	0.896974	0.433542	1.45022	0.483338	0.333285	1.48372	0.736881	0.425828
ALDH1B1	1.01794	1.00189	0.784575	1.01602	0.783094	0.770747	1.02557	1.00587	0.779321
ALDH1L1	1.11973	0.968564	0.524491	1.15607	0.541514	0.46841	1.17702	0.907038	0.517504
ALDH1L2	1.03785	0.997504	0.763535	1.04045	0.765445	0.73569	1.05338	0.992192	0.756532
ALDH2	1.26489	0.910075	0.573115	1.38987	0.629745	0.453095	1.41385	0.762554	0.564945
ALDH3A1	1.08998	0.967391	0.897964	1.12672	0.928233	0.823834	1.13031	0.903493	0.89498
ALDH3B2	1.02722	1.00034	0.739295	1.02688	0.739047	0.719703	1.0386	1.00106	0.733212
ALDH4A1	1.2135	0.926299	0.579406	1.31005	0.625506	0.477466	1.33118	0.802243	0.571975
ALDH5A1	1.09549	0.986837	0.413484	1.11011	0.418999	0.377441	1.13999	0.960248	0.405612
ALDH6A1	1.01863	1.00845	0.676916	1.0101	0.671247	0.664537	1.02641	1.02657	0.669223
ALDH8A1	1.10769	0.968053	0.739883	1.14424	0.7643	0.667953	1.15656	0.904973	0.733483
ALDOB	1.11135	0.954497	0.926247	1.16433	0.970404	0.833443	1.16604	0.874172	0.923789
ALG1	1.14209	0.941879	0.972921	1.21256	1.03296	0.85188	1.21064	0.838057	0.971985
ALG10	0.994084	1.01418	0.830508	0.980181	0.818893	0.835451	0.991882	1.04567	0.823568
ALG10B	0.8002	1.09557	0.777377	0.730397	0.709565	0.971479	0.744238	1.37482	0.769024
ALK	1.11392	0.975027	0.514466	1.14246	0.527643	0.461849	1.16906	0.927331	0.505803
ALLC	1.02743	1.00449	0.742968	1.02284	0.739644	0.72313	1.03856	1.01407	0.734728
ALOX12	1.0815	0.963756	1.03372	1.12218	1.0726	0.95582	1.11737	0.896308	1.03527
ALOX12B	1.08556	0.98316	0.610384	1.10415	0.620839	0.562277	1.1244	0.949417	0.602166
ALOX15	1.13607	0.942546	1.00413	1.20532	1.06534	0.883865	1.2013	0.840759	1.00429
ALOX15B	1.05889	0.977031	0.950955	1.08378	0.973311	0.898071	1.0852	0.93281	0.949281
ALOX5	1.18809	0.946533	0.586429	1.2552	0.619555	0.49359	1.28245	0.850493	0.576458
ALOXE3	1.04115	0.985506	0.949602	1.05646	0.963567	0.912069	1.05843	0.956148	0.947788
ALPI	1.15748	0.929306	1.09844	1.24553	1.182	0.948994	1.23607	0.806755	1.10179
ALPK1	1.00275	1.01229	0.792733	0.990579	0.783109	0.790557	1.00376	1.04042	0.785185
ALPK2	1.09901	0.986887	0.604028	1.11361	0.612054	0.549611	1.13927	0.958356	0.593526
ALPK3	1.03868	0.996364	0.740935	1.04247	0.743639	0.713344	1.05506	0.988711	0.7344
ALPL	1.19408	0.908947	1.28557	1.31369	1.41435	1.07662	1.29383	0.756269	1.29565
ALPP	1.03267	0.990993	0.866399	1.04205	0.874273	0.838991	1.04665	0.971965	0.863464
ALS2	1.07856	0.990817	0.64393	1.08856	0.649898	0.597025	1.11134	0.971465	0.633894
ALS2CL	1.16855	0.925152	1.12191	1.26309	1.21267	0.960085	1.2491	0.795551	1.12735
ALX1	1.0259	1.03197	0.26546	0.99412	0.257237	0.258758	1.03527	1.11569	0.257646
ALX4	1.34037	0.885661	0.643355	1.51342	0.726412	0.479981	1.53463	0.704586	0.634698
AMACR	0.997411	1.01826	0.632809	0.979527	0.621462	0.634452	0.996355	1.05896	0.625301
AMBN	0.899576	1.08033	0.354634	0.832688	0.328266	0.394224	0.864914	1.29679	0.345431
AMBP	0.978451	1.01802	0.822298	0.961132	0.807743	0.840408	0.970255	1.05919	0.817012
AMBRA1	1.17644	0.95724	0.39966	1.22899	0.417513	0.339721	1.26335	0.875503	0.391489
AMDHD1	1.01038	1.0173	0.539508	0.993206	0.530335	0.533963	1.01447	1.05772	0.531378
AMER1	0.963031	1.04617	0.425468	0.920526	0.406689	0.441801	0.94972	1.16449	0.416136
AMFR	1.17375	0.946609	0.705778	1.23995	0.745586	0.601301	1.25583	0.845835	0.698083
AMHR2	1.03237	0.966096	1.32804	1.0686	1.37465	1.2864	1.04671	0.905598	1.34606
AMIGO2	1.17806	0.960714	0.111885	1.22624	0.11646	0.0949734	1.26789	0.883871	0.109234
AMOT	1.04252	1.02979	0.216811	1.01237	0.210539	0.207967	1.06095	1.0957	0.209755
AMOTL1	1.13053	0.982299	0.392828	1.15091	0.399907	0.347471	1.18977	0.945968	0.383283
AMOTL2	1.08194	1.00294	0.306651	1.07876	0.305752	0.283428	1.11838	1.00922	0.298802
AMPD1	0.911376	1.04354	0.859432	0.873351	0.823575	0.943005	0.881533	1.15297	0.854678
AMPD3	1.10971	0.978914	0.515604	1.13361	0.526711	0.464632	1.16002	0.93653	0.506837
AMPH	1.01799	1.01943	0.542389	0.998591	0.532053	0.532804	1.02526	1.06277	0.532274
AMY2B	0.925404	1.03907	0.825066	0.890609	0.794044	0.891575	0.902321	1.14205	0.818021
AMZ1	1.22831	0.919257	0.800407	1.3362	0.870711	0.651635	1.34326	0.774815	0.795567
ANAPC1	1.15561	0.977804	0.352292	1.18184	0.360289	0.304855	1.22577	0.931745	0.342809
ANAPC2	1.37108	0.885016	0.241575	1.54922	0.272961	0.176193	1.6013	0.705662	0.235621
ANAPC4	1.27681	0.929688	0.545028	1.37337	0.586248	0.426868	1.40919	0.798261	0.533362
ANAPC5	1.28365	0.906291	0.623247	1.41638	0.68769	0.485526	1.44144	0.754993	0.613573
ANAPC7	1.2586	0.919583	0.569527	1.36867	0.619331	0.452507	1.39693	0.782875	0.559895
ANGEL1	1.08691	0.972555	0.855182	1.11758	0.879315	0.786804	1.12531	0.919611	0.849938
ANGPT2	1.31047	0.957528	0.103939	1.36859	0.108549	0.0793143	1.471	0.877547	0.0985245
ANGPT4	1.12174	0.96515	0.781451	1.16224	0.809668	0.696643	1.17596	0.898368	0.773585
ANGPTL1	1.89659	0.643892	1.04742	2.94551	1.6267	0.552262	2.80742	0.368944	1.05046
ANGPTL2	1.20725	0.95061	0.462228	1.26998	0.486244	0.382875	1.31224	0.861707	0.450745
ANGPTL4	1.15689	0.94696	0.844784	1.22169	0.892101	0.73022	1.22886	0.847478	0.839441
ANGPTL5	0.891314	1.05008	0.797617	0.848805	0.759578	0.894879	0.861508	1.19848	0.789819
ANK1	1.23302	0.935957	0.258249	1.31739	0.275919	0.209444	1.35955	0.822013	0.25234
ANK2	1.14801	0.989442	0.155957	1.16026	0.157621	0.13585	1.21264	0.965923	0.150965
ANK3	1.23265	0.961701	0.118865	1.28174	0.123599	0.0964308	1.34344	0.88295	0.114794
ANKAR	1.01059	1.01833	0.680639	0.992397	0.668389	0.67351	1.01446	1.06099	0.669806
ANKFN1	1.09805	0.997328	0.498882	1.10099	0.500219	0.454335	1.13758	0.99141	0.486714
ANKFY1	1.22678	0.931549	0.387854	1.31692	0.416353	0.316157	1.34974	0.811489	0.380715
ANKH	1.42308	0.848021	0.183589	1.67812	0.216491	0.129008	1.72333	0.637669	0.180018
ANKHD1-EIF4EBP3	1.18034	0.938022	0.799393	1.25832	0.852212	0.677259	1.26777	0.825749	0.793369
ANKIB1	1.21322	0.972958	0.184311	1.24694	0.189434	0.151919	1.30857	0.914693	0.177748
ANKK1	1.04654	0.980157	1.00826	1.06773	1.02867	0.963424	1.06635	0.940062	1.00854
ANKLE1	1.05562	0.975758	0.995636	1.08185	1.02037	0.943175	1.08087	0.929407	0.995495
ANKLE2	1.15124	0.962307	0.518268	1.19633	0.538568	0.450183	1.22377	0.889867	0.50939
ANKMY1	1.08025	0.972981	0.883498	1.11024	0.908032	0.817868	1.1149	0.918251	0.880029
ANKRD11	1.30199	0.903209	0.490817	1.44151	0.543415	0.376976	1.47052	0.7409	0.482867
ANKRD12	1.26262	0.96741	0.242165	1.30516	0.250323	0.191795	1.37373	0.894745	0.232705
ANKRD13B	1.29702	0.903503	0.55165	1.43555	0.610568	0.425321	1.46018	0.740547	0.543726
ANKRD13C	1.27792	0.945175	0.245757	1.35204	0.260012	0.192311	1.42143	0.844438	0.23668
ANKRD13D	1.2536	0.933716	0.320069	1.34259	0.342791	0.25532	1.38195	0.808534	0.313096
ANKRD17	1.37756	0.894184	0.0927752	1.54058	0.103754	0.0673474	1.61263	0.726598	0.0897381
ANKRD18A	1.00911	1.01634	0.720561	0.992886	0.708976	0.714056	1.01225	1.05599	0.710327
ANKRD18B	1.04269	1.00246	0.746631	1.04013	0.744796	0.716062	1.05782	1.00826	0.736989
ANKRD24	1.12074	0.969895	0.611714	1.15553	0.630701	0.545811	1.17514	0.908933	0.603796
ANKRD26	1.06771	1.01161	0.563155	1.05546	0.556691	0.527441	1.09149	1.03981	0.54884
ANKRD27	1.16917	0.943612	0.771102	1.23904	0.817182	0.659531	1.25077	0.840691	0.764374
ANKRD30A	1.07915	0.999541	0.654977	1.07965	0.655278	0.606936	1.10725	0.998459	0.642144
ANKRD30B	1.08722	0.98656	0.763883	1.10203	0.77429	0.702602	1.11926	0.956348	0.754243
ANKRD33	1.14099	0.936791	1.12134	1.21798	1.197	0.982781	1.20575	0.822719	1.12663
ANKRD34A	1.20903	0.932886	0.161622	1.29601	0.173249	0.133678	1.33566	0.823958	0.158261
ANKRD34B	0.958735	1.01067	1.08747	0.948609	1.07599	1.13428	0.944391	1.03503	1.09176
ANKRD34C	1.19427	0.948531	0.351997	1.25907	0.371097	0.29474	1.2914	0.850134	0.345385
ANKRD35	1.00359	1.00606	0.892234	0.997538	0.886856	0.889045	1.00509	1.018	0.88753
ANKRD36	0.938206	1.03647	0.792074	0.905197	0.764206	0.844243	0.91914	1.13312	0.783827
ANKRD36C	1.01695	1.02862	0.512747	0.988664	0.498483	0.504198	1.02272	1.1024	0.499972
ANKRD44	1.12572	0.982429	0.21772	1.14585	0.221614	0.193405	1.18445	0.945923	0.212573
ANKRD50	1.20463	0.973947	0.258477	1.23685	0.265392	0.21457	1.29873	0.920417	0.249183
ANKRD52	1.36946	0.862746	0.247977	1.58733	0.287428	0.181076	1.62475	0.668666	0.243724
ANKRD55	1.00923	0.999587	0.938443	1.00964	0.938831	0.929864	1.0128	0.998682	0.936238
ANKRD6	1.02862	0.99908	0.804472	1.02957	0.805212	0.782086	1.04012	0.997095	0.798381
ANKS1A	1.2959	0.905332	0.403104	1.43141	0.445255	0.311061	1.4659	0.749004	0.395681
ANKS1B	1.29792	0.925405	0.30147	1.40255	0.325771	0.232271	1.45588	0.79192	0.292981
ANKS3	1.17483	0.957796	0.465756	1.2266	0.486279	0.396445	1.25681	0.874054	0.457139
ANKS4B	1.06789	0.984406	0.780834	1.08481	0.793204	0.731191	1.09672	0.952396	0.774159
ANKS6	1.02058	0.99218	0.979539	1.02862	0.987259	0.959787	1.02908	0.975315	0.979027
ANKZF1	0.978993	1.00838	1.01418	0.970855	1.00575	1.03594	0.970534	1.02553	1.01479
ANLN	0.978853	1.05001	0.370433	0.932229	0.352788	0.378435	0.971696	1.18516	0.359388
ANO1	1.25799	0.917351	0.453459	1.37133	0.494313	0.360462	1.40284	0.77898	0.445484
ANO10	0.954645	1.02324	0.94114	0.932964	0.919765	0.985853	0.937593	1.07387	0.938602
ANO2	0.982874	1.01753	0.806606	0.96594	0.792708	0.82066	0.976119	1.05623	0.800851
ANO3	1.14425	0.946072	0.941996	1.20947	0.995691	0.823243	1.20984	0.850339	0.939086
ANO4	1.075	0.992023	0.688626	1.08365	0.694163	0.640581	1.10599	0.97549	0.677963
ANO5	1.01914	0.988923	1.05222	1.03055	1.064	1.03246	1.0261	0.965329	1.05512
ANO6	1.05752	0.988297	0.828007	1.07004	0.837813	0.782973	1.08127	0.964599	0.821147
ANO7	1.19122	0.906641	1.29508	1.31388	1.42844	1.08719	1.28732	0.753884	1.30894
ANO8	1.47163	0.83376	0.483468	1.76506	0.579864	0.328524	1.79754	0.607605	0.475592
ANO9	1.18489	0.939491	0.697529	1.2612	0.742454	0.588689	1.27534	0.827223	0.69082
ANPEP	0	1.42571	0.78422	0	0.550056		0	16.0664	0.777946
ANTXR1	1.22405	0.936892	0.326819	1.3065	0.348834	0.266998	1.35085	0.830812	0.318911
ANTXR2	1.00538	1.02875	0.511203	0.977288	0.496918	0.508466	1.00748	1.09508	0.500229
ANXA10	1.07205	0.989092	0.763115	1.08387	0.771531	0.711828	1.10039	0.965833	0.754029
ANXA13	1.05887	0.997233	0.672827	1.06181	0.674694	0.635417	1.08363	0.991513	0.662709
ANXA6	1.03922	0.997403	0.663196	1.04192	0.664923	0.638168	1.05579	0.991772	0.656826
AOAH	1.08466	0.978589	0.815032	1.10839	0.832864	0.751419	1.11979	0.935032	0.808076
AOC2	0.977919	1.01413	0.911772	0.964296	0.89907	0.932359	0.969015	1.04437	0.908943
AOC3	1.1069	0.963725	0.814846	1.14856	0.845517	0.736152	1.15742	0.896231	0.809385
AOX1	0.95788	1.02649	0.829954	0.933162	0.808537	0.866449	0.942465	1.08866	0.824546
AP1B1	1.40607	0.858768	0.149593	1.63731	0.174194	0.106391	1.68923	0.6595	0.146228
AP1G1	1.31678	0.916985	0.182638	1.43599	0.199173	0.138701	1.49741	0.775586	0.177063
AP1G2	1.00563	1.00083	0.922479	1.00479	0.921715	0.917318	1.00798	1.00258	0.920382
AP1M1	1.68276	0.73615	0.500783	2.28589	0.680273	0.297596	2.31796	0.469565	0.492942
AP2A1	1.40691	0.85285	0.344155	1.64966	0.403535	0.244617	1.68635	0.646324	0.338251
AP2A2	1.37392	0.872072	0.17187	1.57546	0.197083	0.125095	1.62949	0.688739	0.167709
AP2M1	2.08712	0.59299	0	3.51966	0	0	3.70285	0.319138	0
AP3B1	1.05546	1.00971	0.453685	1.04531	0.449321	0.429845	1.07672	1.03295	0.443828
AP3B2	1.20352	0.938334	0.480093	1.28261	0.511644	0.398908	1.30872	0.826214	0.472678
AP3D1	1.31579	0.899507	0.292697	1.46279	0.325397	0.22245	1.5042	0.737093	0.286596
AP4B1	0.999276	1.02723	0.596395	0.972791	0.580588	0.596827	0.998998	1.08944	0.585218
AP4E1	1.1507	0.98411	0.392063	1.16928	0.398394	0.340717	1.21369	0.949151	0.381086
AP4M1	1.15393	0.946907	0.766441	1.21863	0.809415	0.664203	1.22903	0.84929	0.760608
AP5B1	1.11697	0.952093	0.841759	1.17317	0.884114	0.753611	1.17863	0.869981	0.837991
APAF1	1.17677	0.974413	0.436732	1.20767	0.4482	0.371129	1.24997	0.918243	0.425167
APBA1	1.3981	0.881516	0.303173	1.58602	0.343922	0.216846	1.63474	0.690579	0.296062
APBA2	1.32345	0.904985	0.308118	1.4624	0.340468	0.232815	1.50532	0.742933	0.301343
APBB1	1.17941	0.959601	0.343359	1.22906	0.357815	0.291129	1.26895	0.8829	0.335342
APBB1IP	1.22601	0.95378	0.145474	1.28543	0.152523	0.118656	1.34338	0.866851	0.140885
APBB2	1.28668	0.918575	0.360885	1.40073	0.392875	0.280478	1.44285	0.777064	0.352733
APBB3	1.13897	0.965274	0.526057	1.17995	0.544983	0.46187	1.20493	0.897582	0.517763
APC	1.04648	0.985025	0.976629	1.06239	0.991476	0.933252	1.06297	0.951592	0.975466
APC2	1.27038	0.91577	0.299218	1.38722	0.326739	0.235535	1.41789	0.765993	0.294318
APCDD1	1.17525	0.955316	0.517363	1.23023	0.541562	0.440213	1.25748	0.867467	0.508611
APCDD1L	1.14297	0.958981	0.611522	1.19185	0.637679	0.535031	1.20931	0.877406	0.604558
APCS	1.05608	0.973411	1.01975	1.08493	1.04761	0.965599	1.0816	0.925963	1.02072
APEH	1.1289	0.946623	1.00851	1.19256	1.06537	0.893351	1.18851	0.849229	1.00884
APEX2	1.08763	1.00892	0.061903	1.07801	0.0613556	0.0569158	1.12666	1.02876	0.0599846
APLNR	1.34036	0.902806	0.182444	1.48467	0.202086	0.136115	1.5378	0.739319	0.177727
APLP1	1.24451	0.926909	0.415117	1.34264	0.44785	0.333559	1.37655	0.799183	0.407232
APLP2	1.05599	1.01403	0.330688	1.04138	0.326114	0.313156	1.07775	1.04802	0.322442
APOA4	1.10837	0.967643	0.803381	1.14543	0.830245	0.724834	1.1562	0.904303	0.796902
APOA5	1.11685	0.985193	0.455904	1.13363	0.462756	0.408207	1.16698	0.953432	0.446083
APOB	1.03601	1.02188	0.434496	1.01383	0.425192	0.419393	1.0506	1.07119	0.423488
APOBR	1.14447	0.958724	0.71972	1.19374	0.750706	0.628868	1.20966	0.878099	0.711744
APOH	0.973524	1.02176	0.759158	0.952794	0.742993	0.779805	0.963998	1.07513	0.752983
APOL5	0.99619	0.997016	1.08493	0.999172	1.08818	1.08908	0.994685	0.99076	1.08845
APP	1.19116	0.96299	0.351386	1.23694	0.364891	0.294996	1.27936	0.887579	0.342521
APPBP2	1.56046	0.840377	0.151826	1.85685	0.180665	0.0972962	1.96211	0.624201	0.145605
APPL1	1.05103	1.02549	0.389825	1.02491	0.380135	0.370898	1.06943	1.08957	0.377638
APPL2	1.06702	0.988913	0.762495	1.07899	0.771044	0.7146	1.09396	0.965352	0.754305
AQP10	1.19264	0.919103	0.712708	1.29761	0.775439	0.597591	1.30808	0.793712	0.707612
AQP8	1.13069	0.95609	0.606009	1.18262	0.63384	0.535962	1.19962	0.878556	0.599486
AQR	1.28892	0.933529	0.289098	1.3807	0.309683	0.224294	1.43884	0.812262	0.280144
AR	1.10631	0.968767	0.781272	1.14198	0.80646	0.706196	1.15463	0.90927	0.7741
ARAF	1.42536	0.85491	0.400965	1.66726	0.469015	0.281308	1.70742	0.647423	0.393202
ARAP1	1.2009	0.940067	0.479391	1.27747	0.509953	0.399192	1.30523	0.831966	0.471525
ARAP2	0.976075	1.05391	0.369413	0.926148	0.350517	0.378468	0.968033	1.19978	0.35768
ARAP3	1.06187	0.999611	0.451997	1.06228	0.452173	0.425661	1.08969	0.998802	0.443827
ARC	1.54623	0.830645	0.452521	1.86148	0.544783	0.292662	1.90975	0.595057	0.442126
ARFGAP2	1.03006	1.0166	0.445485	1.01324	0.438212	0.432485	1.042	1.0553	0.436558
ARFGEF1	1.4699	0.884404	0.175926	1.66202	0.19892	0.119686	1.75371	0.699822	0.168827
ARFGEF2	1.16641	0.978925	0.255441	1.19152	0.26094	0.218998	1.24391	0.935814	0.24747
ARHGAP10	1.06136	1.00411	0.508903	1.05702	0.506822	0.47948	1.08677	1.01311	0.49865
ARHGAP11A	0.97933	1.02341	0.731034	0.956926	0.71431	0.746463	0.97237	1.083	0.722661
ARHGAP12	1.1333	0.994796	0.436069	1.13923	0.43835	0.384778	1.18732	0.983312	0.422529
ARHGAP15	1.01207	1.02526	0.563362	0.987138	0.549482	0.556642	1.01647	1.08599	0.551447
ARHGAP17	1.12245	0.986288	0.305368	1.13806	0.309613	0.272054	1.17893	0.958024	0.297626
ARHGAP18	1.05905	1.00255	0.644356	1.05635	0.642715	0.608429	1.08245	1.00809	0.632664
ARHGAP20	1.1195	0.990335	0.390558	1.13042	0.39437	0.348869	1.1696	0.968953	0.380712
ARHGAP21	1.20796	0.960348	0.379845	1.25784	0.395528	0.314451	1.30414	0.88082	0.369459
ARHGAP22	1.1516	0.960256	0.547336	1.19926	0.569989	0.475283	1.22124	0.880075	0.539675
ARHGAP24	1.07999	0.990964	0.642657	1.08984	0.648517	0.595057	1.11172	0.970898	0.632922
ARHGAP25	1.04587	1.0123	0.483044	1.03317	0.477176	0.461857	1.06387	1.04081	0.472773
ARHGAP26	1.28434	0.909544	0.593451	1.41207	0.65247	0.462065	1.43711	0.756271	0.584454
ARHGAP27	1.20394	0.93443	0.672716	1.28842	0.719921	0.558762	1.30445	0.813484	0.665553
ARHGAP28	1.13959	0.969281	0.626654	1.17571	0.646514	0.549893	1.19991	0.906345	0.616575
ARHGAP29	1.06742	1.03845	0.271281	1.0279	0.261237	0.254145	1.0925	1.13382	0.259283
ARHGAP30	1.0498	1.03682	0.1145	1.01251	0.110434	0.109069	1.07095	1.12147	0.110025
ARHGAP31	1.06482	1.01446	0.248532	1.04964	0.244989	0.233403	1.09228	1.04712	0.241508
ARHGAP32	1.16298	0.973218	0.292443	1.19499	0.300491	0.251459	1.23839	0.918098	0.284814
ARHGAP33	1.16687	0.949996	0.474159	1.22829	0.499117	0.406352	1.25462	0.860574	0.466692
ARHGAP35	1.28838	0.930381	0.14976	1.38479	0.160966	0.116239	1.44671	0.806598	0.145025
ARHGAP36	0.841507	1.11113	0.0795473	0.757341	0.0715911	0.0945295	0.789543	1.44563	0.0772689
ARHGAP39	1.34706	0.898806	0.377623	1.49872	0.420139	0.280331	1.54069	0.727338	0.369411
ARHGAP4	1.31809	0.910251	0.208029	1.44805	0.22854	0.157826	1.50013	0.757935	0.202626
ARHGAP42	1.34945	0.914292	0.30772	1.47595	0.336567	0.228034	1.54314	0.769274	0.297279
ARHGAP44	1.39127	0.877375	0.298402	1.58572	0.340107	0.214481	1.64291	0.695505	0.290374
ARHGAP5	1.28993	0.947595	0.229821	1.36127	0.242531	0.178165	1.42763	0.842426	0.221584
ARHGAP6	1.29293	0.914514	0.405919	1.41379	0.443863	0.313953	1.45706	0.771888	0.39647
ARHGAP9	0.974858	1.02834	0.663383	0.947996	0.645104	0.680492	0.965028	1.09303	0.655291
ARHGEF1	1.26343	0.909877	0.625474	1.38857	0.687427	0.495061	1.40613	0.756043	0.618592
ARHGEF10	1.10631	0.97324	0.700679	1.13673	0.719944	0.633345	1.15287	0.918889	0.692885
ARHGEF10L	1.24893	0.922747	0.369324	1.35349	0.400244	0.295712	1.38623	0.788867	0.362693
ARHGEF11	1.02264	1.03489	0.150227	0.988165	0.145162	0.1469	1.03214	1.11599	0.145678
ARHGEF12	1.13973	0.997763	0.207031	1.14229	0.207495	0.181648	1.20092	0.992872	0.19955
ARHGEF15	1.04607	1.00233	0.479171	1.04364	0.478055	0.458066	1.06674	1.00721	0.471776
ARHGEF16	1.2035	0.934075	0.686638	1.28844	0.735099	0.570535	1.3043	0.813826	0.679312
ARHGEF17	1.12162	0.972695	0.41534	1.15311	0.426999	0.370303	1.17954	0.918286	0.408496
ARHGEF18	1.21454	0.937481	0.498346	1.29553	0.53158	0.410318	1.32409	0.823692	0.489898
ARHGEF19	1.05577	0.974729	1.03327	1.08314	1.06006	0.978694	1.07994	0.925399	1.03453
ARHGEF2	1.23781	0.922757	0.512106	1.34142	0.554973	0.413721	1.37151	0.795545	0.503211
ARHGEF25	1.05975	0.993307	0.653947	1.06689	0.658353	0.617075	1.08608	0.979713	0.645417
ARHGEF26	1.11979	0.968687	0.706752	1.15599	0.729599	0.631145	1.1723	0.905453	0.698781
ARHGEF3	1.19353	0.943601	0.707205	1.26487	0.749475	0.592531	1.28455	0.839559	0.697632
ARHGEF33	1.21635	0.970929	0.220988	1.25277	0.227604	0.18168	1.32363	0.915151	0.21221
ARHGEF37	0.900245	1.05331	0.817671	0.85468	0.776285	0.908276	0.865009	1.18257	0.81184
ARHGEF4	1.13745	0.967908	0.576218	1.17516	0.595323	0.506589	1.19934	0.903148	0.567186
ARHGEF5	0.948266	1.02193	0.982714	0.92792	0.961629	1.03633	0.929882	1.07278	0.982011
ARHGEF6	1.17766	0.98236	0.281256	1.19881	0.286306	0.238826	1.25773	0.945602	0.271352
ARHGEF7	1.37882	0.894707	0.194645	1.54109	0.217551	0.141167	1.60741	0.725653	0.188589
ARHGEF9	1.56312	0.811138	0.494082	1.92707	0.609121	0.316086	1.97463	0.575062	0.482583
ARID1A	1.31952	0.912969	0.202266	1.4453	0.221547	0.153288	1.50637	0.7689	0.196166
ARID1B	1.08043	0.81917	3.57966	1.31893	4.36986	3.3132	1.11444	0.587648	4.00409
ARID2	1.2812	0.943398	0.300012	1.35807	0.318012	0.234165	1.42556	0.84035	0.289127
ARID3A	1.36404	0.879363	0.304922	1.55117	0.346753	0.223543	1.59622	0.697517	0.298318
ARID3B	1.14665	0.972027	0.326127	1.17965	0.335513	0.284418	1.21944	0.918466	0.318369
ARID3C	0.875118	1.06827	0.758364	0.819189	0.709897	0.866585	0.828785	1.2342	0.753204
ARID4A	1.20672	0.976766	0.294457	1.23542	0.301461	0.244014	1.29241	0.924349	0.284386
ARID5A	1.17952	0.944421	0.463997	1.24894	0.491303	0.393377	1.27235	0.842457	0.457522
ARID5B	1.25371	0.948065	0.113083	1.32238	0.119278	0.0901991	1.38731	0.851317	0.109203
ARIH2	1.59673	0.821943	0.382365	1.94263	0.465196	0.239467	2.01931	0.590366	0.369695
ARMC2	1.17029	0.955316	0.56303	1.22503	0.589365	0.481102	1.25215	0.870888	0.553449
ARMC3	0.903916	1.03875	0.988545	0.8702	0.951672	1.09362	0.872304	1.13672	0.98812
ARMC4	1.01796	1.00228	0.852147	1.01564	0.850206	0.837116	1.02485	1.00725	0.846433
ARMC5	1.16403	0.93503	0.659762	1.24491	0.705605	0.566793	1.25762	0.828529	0.654375
ARMC6	1.0585	0.976058	0.991213	1.08447	1.01553	0.93643	1.08376	0.927724	0.990944
ARMC9	1.10578	0.962309	0.88141	1.14909	0.915933	0.797092	1.15399	0.890746	0.877501
ARMCX1	1.32545	0.887873	0.472014	1.49284	0.531624	0.356116	1.52512	0.716448	0.46386
ARMCX2	1.2745	0.918002	0.0831458	1.38835	0.0905725	0.0652378	1.43941	0.782831	0.0810429
ARMCX5	1.02027	1.02309	0.468442	0.997246	0.457869	0.459133	1.02786	1.07933	0.45822
ARNT	1.18408	0.97487	0.191497	1.21461	0.196433	0.161726	1.27139	0.923724	0.18518
ARNT2	1.2627	0.940889	0.242022	1.34203	0.257227	0.19167	1.39902	0.831742	0.234611
ARNTL	1.26937	0.922261	0.395576	1.37637	0.428919	0.311631	1.41142	0.78272	0.387911
ARNTL2	1.047	1.00245	0.666613	1.04444	0.664983	0.636691	1.06388	1.00841	0.657295
ARPP21	1.09764	1.00655	0.400026	1.09051	0.397424	0.36444	1.13822	1.02085	0.387539
ARRB1	1.31997	0.886747	0.264205	1.48855	0.297949	0.20016	1.5234	0.713092	0.25971
ARSB	0.935726	1.02176	1.10241	0.915797	1.07893	1.17814	0.911958	1.0698	1.10688
ARSD	1.13199	0.963782	0.630973	1.17453	0.654684	0.557402	1.19351	0.8931	0.623097
ARSF	1.20544	0.924406	0.845598	1.30401	0.914747	0.701486	1.3099	0.79524	0.840477
ARSG	1.13342	0.980228	0.303229	1.15628	0.309345	0.267534	1.19835	0.941559	0.295507
ARSH	0.941318	1.0254	0.982724	0.917998	0.958378	1.04399	0.919922	1.08396	0.982091
ARSI	1.06265	0.973146	1.00215	1.09197	1.02981	0.943071	1.09025	0.921869	1.00224
ARSJ	1.14529	0.937693	1.01438	1.22139	1.08179	0.8857	1.21472	0.832617	1.01512
ARVCF	1.09739	0.971474	0.660072	1.12962	0.679454	0.60149	1.14206	0.913664	0.654543
ASAP1	1.36652	0.894819	0.213704	1.52715	0.238823	0.156386	1.59559	0.732546	0.20684
ASAP2	1.27783	0.925954	0.23286	1.38001	0.251481	0.182231	1.43413	0.799043	0.226336
ASAP3	1.03226	1.00397	0.669683	1.02817	0.667032	0.648754	1.04548	1.01263	0.661588
ASB10	1.04878	0.973125	1.16855	1.07774	1.20082	1.1142	1.07004	0.919374	1.17372
ASB17	1.01698	1.01365	0.716708	1.00328	0.707055	0.704744	1.02351	1.0436	0.706389
ASB2	1.11878	0.951448	0.972679	1.17587	1.02231	0.869411	1.17474	0.861361	0.971836
ASB3	0.978359	1.0266	0.726821	0.953005	0.707985	0.742898	0.970355	1.08803	0.717726
ASB4	1.00541	1.01244	0.728513	0.993063	0.719564	0.72459	1.00747	1.04116	0.720985
ASB5	1.04357	0.994938	0.825456	1.04888	0.829656	0.790996	1.0613	0.984675	0.817994
ASCC2	1.07183	0.996275	0.478757	1.07584	0.480547	0.446672	1.10276	0.988254	0.470184
ASCC3	1.11308	0.979383	0.647681	1.13651	0.661316	0.581882	1.16004	0.935965	0.637324
ASH1L	1.12445	1.0029	0.151634	1.12119	0.151195	0.134852	1.17851	1.00939	0.146214
ASH2L	1.22296	0.943681	0.386222	1.29594	0.409271	0.31581	1.33822	0.841659	0.37694
ASL	1.25568	0.909281	0.823753	1.38095	0.905939	0.656024	1.387	0.752953	0.8187
ASMT	1.01696	1.00182	0.840532	1.01511	0.839006	0.826517	1.02382	1.00568	0.83529
ASMTL	1.27755	0.907654	0.456893	1.40753	0.503378	0.357633	1.43471	0.753112	0.450019
ASNS	1.00694	0.999464	0.962235	1.00748	0.962751	0.955601	1.00952	0.998267	0.960736
ASNSD1	1.0588	0.984184	0.909502	1.07582	0.924117	0.858989	1.0808	0.949514	0.905629
ASPG	1.1667	0.922273	1.22547	1.26503	1.32874	1.05037	1.25219	0.78769	1.23175
ASPH	1.0723	0.996021	0.658293	1.07659	0.660923	0.613905	1.10013	0.987111	0.647441
ASPHD1	1.14906	0.953139	0.549839	1.20555	0.576872	0.478513	1.22772	0.870488	0.54233
ASPM	1.03611	1.01359	0.680975	1.02222	0.671842	0.65724	1.04852	1.04608	0.667955
ASPRV1	1.17234	0.940867	0.674168	1.24603	0.716539	0.57506	1.25939	0.83277	0.66819
ASS1	1.17679	0.935124	0.817168	1.25843	0.87386	0.694406	1.26639	0.82248	0.81169
ASTE1	1.10523	0.957773	0.983141	1.15396	1.02649	0.889532	1.15227	0.878717	0.982452
ASTL	1.01096	1.01112	0.621166	0.999845	0.614337	0.614432	1.01557	1.03543	0.614366
ASTN1	1.14708	0.972725	0.362557	1.17924	0.372723	0.31607	1.21628	0.91801	0.354362
ASTN2	1.23383	0.936452	0.339443	1.31756	0.362478	0.275112	1.35595	0.82046	0.332175
ASXL1	1.04211	0.954676	1.55631	1.09159	1.6302	1.49342	1.05937	0.868546	1.58817
ASXL2	1.19825	0.972088	0.157392	1.23266	0.161912	0.131351	1.2933	0.915541	0.151944
ASXL3	1.08685	0.998748	0.430953	1.08822	0.431493	0.396514	1.12237	0.995923	0.421166
ASZ1	0.944682	1.04885	0.535414	0.900683	0.510476	0.566766	0.926659	1.18199	0.52463
ATAD2	1.2091	0.967852	0.288484	1.24926	0.298066	0.238595	1.30298	0.900305	0.279403
ATAD3A	1.19698	0.936331	0.737018	1.27838	0.787134	0.61573	1.29291	0.82103	0.729369
ATAD3B	1.11041	0.96584	0.807527	1.14968	0.836088	0.727233	1.15902	0.897862	0.801827
ATAD5	1.11079	1.01322	0.182656	1.0963	0.180273	0.164437	1.15285	1.04666	0.17588
ATCAY	1.34426	0.883457	0.451991	1.52159	0.511616	0.336238	1.55305	0.701944	0.444501
ATE1	1.20296	0.958529	0.447801	1.25501	0.467175	0.372248	1.30158	0.88114	0.435438
ATF2	1.34215	0.903146	0.412885	1.48608	0.457163	0.30763	1.53252	0.741306	0.402787
ATF6	1.13918	0.983548	0.474624	1.15824	0.482563	0.416636	1.19994	0.949731	0.462049
ATF6B	1.02953	0.981	1.14148	1.04947	1.16359	1.10873	1.04217	0.943163	1.14656
ATF7	1.17017	0.961002	0.268979	1.21766	0.279894	0.229862	1.25552	0.88599	0.263047
ATF7IP	1.11981	0.997253	0.195353	1.12289	0.195891	0.174452	1.16987	0.9909	0.189527
ATG14	1.08193	1.0051	0.397612	1.07644	0.395595	0.367502	1.11478	1.01683	0.387419
ATG16L1	1.33984	0.894388	0.489017	1.49805	0.546761	0.364982	1.53664	0.72668	0.47876
ATG2A	1.17539	0.950239	0.445644	1.23694	0.468981	0.379147	1.26395	0.857151	0.438448
ATG2B	1.1222	0.988478	0.404059	1.13528	0.408769	0.360058	1.17309	0.962863	0.394211
ATG4D	1.10665	0.976576	0.614812	1.13319	0.629559	0.555564	1.15248	0.926984	0.606859
ATG7	1.19523	0.951451	0.36295	1.25622	0.38147	0.303666	1.29628	0.862866	0.354585
ATG9A	1.31867	0.904602	0.248374	1.45773	0.274567	0.188352	1.51287	0.753841	0.241628
ATL1	1.24124	0.947499	0.312635	1.31001	0.329958	0.251874	1.36913	0.854567	0.302505
ATM	1.02079	1.00907	0.7643	1.01162	0.757432	0.748732	1.02807	1.03054	0.755088
ATMIN	1.11976	0.990256	0.296014	1.13078	0.298927	0.264355	1.17181	0.968941	0.288339
ATN1	1.09519	0.990103	0.204597	1.10614	0.206642	0.186813	1.14293	0.970869	0.199981
ATP10A	1.16303	0.959765	0.438397	1.21179	0.456776	0.376944	1.24318	0.883108	0.430073
ATP10B	1.0018	1.00519	0.891955	0.99663	0.887349	0.89035	1.0025	1.01663	0.888214
ATP10D	1.02437	1.01547	0.583562	1.00877	0.574673	0.569679	1.03384	1.05089	0.573242
ATP11A	1.19832	0.955216	0.318774	1.2545	0.333719	0.266017	1.30035	0.872695	0.310439
ATP11B	1.22654	0.946599	0.552544	1.29573	0.583716	0.450491	1.32979	0.842193	0.540922
ATP11C	1.17602	0.960674	0.563692	1.22416	0.586767	0.479323	1.25563	0.883166	0.55244
ATP12A	1.08842	0.982505	0.55992	1.1078	0.56989	0.514435	1.12937	0.947647	0.552021
ATP13A1	1.31848	0.891486	0.37325	1.47897	0.418683	0.283092	1.51256	0.720914	0.366814
ATP13A2	1.14757	0.939474	0.890201	1.2215	0.947552	0.775726	1.22382	0.833385	0.887663
ATP13A3	1.24934	0.956948	0.197659	1.30555	0.206551	0.15821	1.36798	0.869869	0.190834
ATP13A4	1.01338	1.01696	0.613656	0.996486	0.603425	0.605553	1.0185	1.05635	0.604028
ATP13A5	0.962301	1.0305	0.780274	0.933821	0.757182	0.810843	0.948405	1.10002	0.772168
ATP1A1	1.96093	0.624608	0.202211	3.13946	0.323741	0.10312	3.24422	0.351272	0.196717
ATP1A2	1.46404	0.812542	0.567521	1.8018	0.698451	0.38764	1.82446	0.586689	0.560313
ATP1A3	1.66705	0.746663	0.212929	2.23267	0.285174	0.127728	2.2935	0.482892	0.208492
ATP1A4	1.04495	0.986482	0.865149	1.05927	0.877004	0.82793	1.0652	0.960013	0.861334
ATP1B4	1.07626	1.00162	0.517566	1.07452	0.516731	0.480894	1.1083	1.00506	0.505871
ATP2A1	1.30617	0.869893	0.987548	1.50153	1.13525	0.756062	1.49419	0.679442	0.987223
ATP2A2	1.91617	0.657335	0.331501	2.91506	0.504311	0.173002	2.98018	0.374521	0.324397
ATP2A3	1.35019	0.868019	0.671121	1.55549	0.773164	0.497055	1.56853	0.671389	0.665229
ATP2B1	1.47723	0.870664	0.123263	1.69667	0.141574	0.0834422	1.78048	0.67134	0.118874
ATP2B2	1.602	0.784172	0.140739	2.04292	0.179475	0.0878518	2.10954	0.532131	0.137401
ATP2B3	1.33489	0.888488	0.311028	1.50243	0.350064	0.232999	1.54028	0.713014	0.305184
ATP2B4	1.09616	0.985583	0.408516	1.11219	0.414491	0.37268	1.1435	0.958003	0.40051
ATP2C1	1.30235	0.917832	0.41544	1.41894	0.452632	0.318993	1.46127	0.772197	0.405833
ATP2C2	1.05388	0.978724	0.976827	1.07679	0.998062	0.926889	1.07687	0.934999	0.976155
ATP4A	1.26676	0.901199	0.649446	1.40564	0.720646	0.512684	1.42151	0.743763	0.64286
ATP6AP1	1.28099	0.923545	0.183826	1.38704	0.199044	0.143503	1.43824	0.790365	0.178996
ATP6V0A1	1.34825	0.893632	0.232989	1.50873	0.260721	0.172809	1.56551	0.728908	0.226667
ATP6V0A2	1.11804	0.972544	0.618693	1.1496	0.636159	0.553373	1.17221	0.918798	0.60949
ATP6V0A4	1.10804	0.979058	0.596001	1.13174	0.60875	0.537887	1.15734	0.937949	0.585996
ATP6V0D2	0.938941	1.04103	0.718444	0.901932	0.690127	0.765165	0.916839	1.14014	0.710623
ATP6V1A	1.31337	0.905882	0.392136	1.44983	0.432878	0.298572	1.48781	0.745936	0.384225
ATP6V1B1	1.02861	0.969465	1.48216	1.061	1.52884	1.44094	1.04057	0.908642	1.50185
ATP6V1B2	1.37007	0.872177	0.407671	1.57087	0.467418	0.297554	1.61305	0.68867	0.399122
ATP6V1H	1.07367	1.00126	0.63331	1.07232	0.632513	0.589856	1.10129	1.00411	0.620472
ATP7A	0.910678	1.02918	1.09564	0.884855	1.06457	1.2031	0.882054	1.10341	1.09957
ATP7B	0.94944	1.01582	1.11478	0.934654	1.09741	1.17414	0.931025	1.0529	1.11858
ATP8A1	1.29841	0.924588	0.366764	1.40431	0.396679	0.282473	1.46019	0.795367	0.355836
ATP8A2	1.1312	0.957293	0.769044	1.18167	0.803352	0.679847	1.19364	0.878144	0.762382
ATP8B1	1.12454	0.97464	0.589737	1.1538	0.605082	0.524427	1.1809	0.9246	0.579315
ATP8B2	1.17832	0.944084	0.555493	1.24811	0.588394	0.471427	1.27066	0.843892	0.547798
ATP8B3	1.07744	0.9757	0.821121	1.10427	0.841571	0.762107	1.112	0.92732	0.816399
ATP8B4	0.967492	1.01445	0.971595	0.953706	0.95775	1.00424	0.956068	1.04793	0.970363
ATP9A	1.53909	0.80722	0.422976	1.90666	0.523991	0.274822	1.95371	0.571691	0.413978
ATP9B	1.12963	0.967003	0.662414	1.16817	0.685018	0.5864	1.18795	0.901709	0.653618
ATR	1.27381	0.927412	0.536379	1.37351	0.578361	0.421083	1.40941	0.795644	0.524988
ATRIP	1.18455	0.96186	0.294934	1.23152	0.306628	0.248983	1.27465	0.887315	0.287519
ATRN	1.23373	0.94926	0.302704	1.29967	0.318884	0.245357	1.35009	0.852718	0.294145
ATRNL1	1.18188	0.969599	0.479542	1.21893	0.494577	0.405746	1.25959	0.90566	0.467361
ATRX	1.33778	0.93776	0.241598	1.42657	0.257633	0.180596	1.49816	0.813512	0.232536
ATXN1	1.34004	0.881014	0.597382	1.52102	0.678062	0.445795	1.54551	0.700897	0.588685
ATXN2	1.1761	0.965376	0.375239	1.21828	0.388697	0.319054	1.25977	0.897194	0.36593
ATXN2L	1.28113	0.917799	0.184911	1.39587	0.201472	0.144335	1.45157	0.785769	0.17977
ATXN7	1.09013	1.00231	0.170507	1.08761	0.170113	0.15641	1.12892	1.00755	0.165967
ATXN7L2	1.14809	0.963491	0.254288	1.19159	0.263923	0.221487	1.22158	0.891887	0.249764
AURKA	1.29576	0.935722	0.293559	1.38478	0.313725	0.226553	1.45441	0.823455	0.282828
AURKB	1.09243	0.979426	0.602118	1.11538	0.614766	0.551173	1.13491	0.93841	0.59435
AURKC	1.03005	0.996012	0.832479	1.03417	0.835812	0.808194	1.04278	0.987819	0.82734
AUTS2	1.24058	0.928941	0.278419	1.33548	0.299717	0.224427	1.37104	0.802059	0.273048
AVIL	0.970658	1.02972	0.717094	0.942646	0.6964	0.738772	0.959496	1.09734	0.708434
AVPR1A	1.10588	0.977419	0.641679	1.13143	0.656503	0.580242	1.15189	0.930949	0.632831
AVPR1B	0.982404	1.01377	0.852836	0.96906	0.841252	0.868111	0.975156	1.04366	0.849277
AXDND1	1.14611	1.00441	0.45683	1.14107	0.454823	0.398593	1.20368	1.01398	0.43839
AXIN1	1.33672	0.886631	0.563373	1.50764	0.635408	0.42146	1.53124	0.704352	0.555689
AXIN2	1.21655	0.947496	0.286005	1.28396	0.301854	0.235096	1.32378	0.845651	0.279544
AXL	1.13474	0.977904	0.344591	1.16038	0.352377	0.303673	1.1991	0.934148	0.336438
AZGP1	1.00227	1.03888	0.451793	0.964752	0.434882	0.450771	1.00313	1.13047	0.439365
B2M	1.09095	1.02549	0	1.06383	0	0	1.13042	1.08423	0
B3GALT1	1.32292	0.903914	0.458636	1.46355	0.507389	0.346684	1.50175	0.742882	0.449105
B3GAT1	1.44664	0.835894	0.54962	1.73065	0.657523	0.379928	1.75455	0.612745	0.542438
B3GAT2	1.01825	1.01432	0.563068	1.00387	0.555119	0.552979	1.02559	1.04678	0.554493
B3GNT3	1.18284	0.945645	0.451435	1.25083	0.477382	0.381652	1.27859	0.84774	0.444038
B3GNT7	1.22987	0.935603	0.397614	1.31453	0.424982	0.323297	1.35125	0.820657	0.389362
B3GNT9	1.24595	0.897967	0.904312	1.38753	1.00707	0.725799	1.38716	0.737462	0.901967
B3GNTL1	1.29846	0.880356	1.01293	1.47492	1.1506	0.780106	1.46341	0.696617	1.01345
B4GALNT1	1.05181	0.98586	0.814445	1.06689	0.826127	0.774328	1.07493	0.957579	0.809737
B4GALNT2	1.03725	0.997204	0.73295	1.04016	0.735005	0.706625	1.05296	0.99128	0.72638
B4GALNT3	1.12793	0.972936	0.574777	1.15931	0.590765	0.509585	1.18664	0.919904	0.564619
B4GALNT4	1.37021	0.866906	0.61267	1.58057	0.706732	0.447137	1.59955	0.667594	0.605623
B4GALT5	1.38831	0.888868	0.147782	1.56188	0.166259	0.106448	1.63508	0.718145	0.142884
BAAT	0.92558	1.04583	0.770119	0.885016	0.736369	0.832039	0.898519	1.15385	0.762704
BACE1	1.12894	0.985065	0.247134	1.14606	0.25088	0.218907	1.18949	0.954488	0.240575
BACE2	1.21138	0.942347	0.285425	1.28549	0.302887	0.23562	1.328	0.841967	0.278746
BACH1	1.12445	1.0054	0.260908	1.11842	0.259507	0.232031	1.17462	1.018	0.251513
BACH2	1.39616	0.881911	0.273403	1.58311	0.310011	0.195824	1.63372	0.692347	0.26682
BAG3	0.953232	1.02798	0.848235	0.927289	0.82515	0.889852	0.935187	1.09101	0.843702
BAG6	1.10151	0.981974	0.409574	1.12173	0.417092	0.371829	1.1507	0.946805	0.402131
BAHCC1	1.21824	0.942353	0.154401	1.29277	0.163846	0.126741	1.33185	0.833504	0.151093
BAHD1	1.0703	1.00005	0.281062	1.07024	0.281046	0.2626	1.10338	1.00017	0.275095
BAIAP2	1.51491	0.820596	0.45556	1.84611	0.555157	0.300718	1.88194	0.583076	0.44775
BAIAP2L1	1.07259	0.998168	0.422935	1.07455	0.423711	0.394313	1.10416	0.994225	0.414672
BAIAP3	1.10749	0.960163	0.891762	1.15344	0.928761	0.805212	1.15684	0.883175	0.888834
BANK1	0.994091	1.02204	0.71184	0.972657	0.696491	0.716071	0.99207	1.07626	0.701657
BANP	1.5632	0.814892	0.302785	1.91829	0.371564	0.193696	1.98053	0.576062	0.295016
BAP1	1.23593	0.901566	0.968799	1.37087	1.07457	0.783865	1.36692	0.743433	0.967945
BARD1	1.01104	0.997901	0.964506	1.01316	0.966535	0.953978	1.01508	0.993194	0.963025
BARHL1	1.3097	0.903467	0.260741	1.44963	0.288601	0.199085	1.49055	0.743198	0.255358
BARHL2	1.20548	0.94728	0.330977	1.27257	0.349397	0.274561	1.30731	0.845477	0.324353
BASP1	1.18601	0.965604	0.0926463	1.22826	0.0959465	0.0781161	1.27455	0.894232	0.0901807
BAZ1A	1.21804	0.963348	0.398559	1.26438	0.413723	0.327214	1.31586	0.888771	0.38639
BAZ1B	1.32691	0.917579	0.231001	1.44609	0.251751	0.17409	1.51001	0.776362	0.223601
BAZ2A	1.05354	1.02127	0.234891	1.03159	0.229998	0.222954	1.07629	1.06923	0.227878
BAZ2B	1.10831	1.01225	0.273398	1.09489	0.270088	0.246681	1.15111	1.04128	0.263366
BBS1	0.990249	1.02257	0.561281	0.968397	0.548895	0.566808	0.986139	1.07228	0.554291
BBS10	0.943132	1.01425	1.10362	0.929886	1.08812	1.17017	0.925179	1.04956	1.10879
BBS12	1.10618	0.984656	0.656015	1.12342	0.666238	0.593043	1.14811	0.95122	0.644844
BBS2	1.05364	0.962215	1.35868	1.09502	1.41204	1.28951	1.07602	0.887662	1.37438
BBS7	1.00245	1.03079	0.464566	0.972506	0.450689	0.46343	1.00332	1.1093	0.454099
BBS9	1.08098	0.986955	0.744115	1.09527	0.75395	0.688371	1.11326	0.959362	0.734561
BBX	1.24314	0.941493	0.463488	1.32039	0.49229	0.372836	1.35883	0.828693	0.453027
BCAM	1.18026	0.934253	0.860305	1.26332	0.920848	0.728908	1.26688	0.810353	0.857144
BCAN	1.03548	1.00639	0.634012	1.02891	0.629986	0.612286	1.05103	1.01936	0.624454
BCAR1	1.20479	0.947551	0.245306	1.27148	0.258884	0.203609	1.31372	0.852172	0.239545
BCAR3	1.03541	1.02159	0.291233	1.01353	0.28508	0.281274	1.04988	1.07187	0.283964
BCAS1	1.00302	1.04582	0.200499	0.959074	0.191714	0.199895	1.00417	1.16135	0.19399
BCAS3	1.1523	0.96718	0.481247	1.1914	0.497577	0.41764	1.2212	0.900105	0.472245
BCAT1	0.937637	1.03418	0.850151	0.906648	0.822053	0.906695	0.91616	1.11697	0.844546
BCAT2	1.1647	0.92945	1.04363	1.25311	1.12285	0.89605	1.24534	0.807626	1.04536
BCHE	0.763702	1.08835	1.00318	0.701704	0.92174	1.31357	0.705494	1.35527	1.00335
BCKDHA	1.11751	0.959279	0.853748	1.16495	0.889989	0.763973	1.1714	0.882022	0.849111
BCKDK	1.14076	0.942526	0.932367	1.21032	0.989222	0.817322	1.21077	0.838053	0.930794
BCL11A	1.48452	0.828183	0.661474	1.7925	0.798704	0.445582	1.80642	0.588656	0.655086
BCL11B	1.79005	0.72583	0.317817	2.46621	0.437867	0.177547	2.50863	0.432753	0.312996
BCL2	1.50046	0.826158	0.354272	1.81619	0.428819	0.236109	1.85419	0.589329	0.348274
BCL2L12	1.04632	0.992599	0.703874	1.05412	0.709123	0.672712	1.06813	0.978368	0.697205
BCL6	1.21563	0.942189	0.295466	1.29022	0.313595	0.243055	1.32523	0.832531	0.289627
BCL6B	1.17753	0.952729	0.281366	1.23596	0.295326	0.238945	1.27219	0.867129	0.275561
BCL9L	1.22779	0.941718	0.227442	1.30378	0.241518	0.185245	1.34435	0.831084	0.222345
BCO2	0.883158	1.04043	1.12671	0.848841	1.08293	1.27578	0.845184	1.1405	1.13233
BCOR	1.17681	0.956541	0.380431	1.23028	0.397716	0.323272	1.2646	0.873695	0.37271
BCORL1	1.16138	0.965042	0.240295	1.20346	0.249	0.206904	1.24287	0.897996	0.234774
BCR	1.26193	0.929048	0.250007	1.3583	0.2691	0.198114	1.40236	0.80114	0.24413
BDKRB1	1.04227	0.997474	0.706629	1.04491	0.708419	0.677969	1.06195	0.992671	0.69848
BDKRB2	1.23565	0.934132	0.399838	1.32278	0.428032	0.323585	1.35983	0.816432	0.391486
BDP1	1.13355	0.981992	0.543518	1.15434	0.553485	0.479481	1.18567	0.940933	0.532199
BEGAIN	1.48049	0.846916	0.285667	1.7481	0.337302	0.192954	1.79303	0.61923	0.279959
BEND2	1.11945	0.997571	0.281507	1.12217	0.282192	0.251469	1.16908	0.99204	0.273068
BEND3	1.35436	0.891197	0.247623	1.51971	0.277855	0.182834	1.56955	0.717888	0.24167
BEND4	1.22672	0.957931	0.270876	1.28059	0.282772	0.220814	1.33646	0.875442	0.262327
BEST2	1.26429	0.892126	0.961623	1.41717	1.0779	0.7606	1.41237	0.722778	0.960434
BFSP1	1.07852	0.978097	0.822606	1.10267	0.841027	0.762718	1.11159	0.932916	0.817097
BFSP2	1.06887	0.984954	0.788297	1.0852	0.80034	0.737502	1.09727	0.953485	0.781399
BGN	1.22155	0.927627	0.359155	1.31686	0.387176	0.294014	1.34554	0.803144	0.35345
BHLHB9	0.933459	1.06059	0.323493	0.880133	0.305013	0.346553	0.911715	1.23469	0.315367
BHMT	1.18265	0.921351	1.01652	1.28361	1.10329	0.859523	1.27529	0.794334	1.01731
BICC1	1.1102	0.99223	0.342475	1.1189	0.345157	0.308479	1.15811	0.975401	0.333899
BICD1	1.20821	0.948486	0.439306	1.27383	0.463166	0.363602	1.31201	0.852796	0.42946
BICD2	1.31307	0.904724	0.297003	1.45135	0.32828	0.22619	1.49534	0.747506	0.290358
BIN1	1.35981	0.879234	0.506202	1.54659	0.575731	0.372259	1.57866	0.694798	0.497408
BIN2	1.09584	0.981015	0.678349	1.11705	0.691477	0.61902	1.13708	0.942281	0.66905
BIRC2	1.13756	0.998939	0.265511	1.13877	0.265793	0.233404	1.19324	0.996469	0.256344
BIRC3	1.13809	0.995374	0.3026	1.14337	0.304007	0.265885	1.19527	0.984925	0.292685
BIRC6	1.25145	0.962192	0.132198	1.30063	0.137393	0.105636	1.37274	0.885895	0.126998
BIVM	1.0807	1.00757	0.492205	1.07258	0.488508	0.45545	1.11306	1.02426	0.478798
BLK	1.07564	0.980902	0.782705	1.09659	0.797944	0.727662	1.1085	0.9426	0.776006
BLM	1.10181	0.97623	0.792485	1.12864	0.811782	0.719256	1.14041	0.922692	0.785492
BLNK	1.20393	0.967961	0.252938	1.24378	0.26131	0.210093	1.30366	0.905732	0.244294
BMP1	1.18689	0.954276	0.402478	1.24376	0.421763	0.339104	1.27696	0.864869	0.394522
BMP10	1.23497	0.941858	0.312354	1.3112	0.331636	0.252925	1.35692	0.835327	0.304432
BMP15	0.926705	1.04509	0.753214	0.886719	0.720714	0.812787	0.9016	1.15691	0.744988
BMP2	1.3261	0.899779	0.435413	1.47381	0.483911	0.32834	1.51149	0.734675	0.42665
BMP3	1.0449	1.01514	0.424663	1.02932	0.418331	0.406415	1.0634	1.04905	0.414795
BMP4	1.13488	0.972486	0.464088	1.16699	0.477218	0.408932	1.19524	0.915193	0.45578
BMP5	1.07142	0.993795	0.641137	1.07811	0.645141	0.598401	1.10049	0.980369	0.631248
BMP6	1.23686	0.957347	0.133732	1.29197	0.13969	0.108122	1.35601	0.874559	0.129068
BMP7	1.34531	0.889015	0.464998	1.51326	0.523049	0.345643	1.54423	0.707739	0.457269
BMPER	1.07948	0.993538	0.557634	1.0865	0.561261	0.516578	1.11215	0.979337	0.547959
BMPR1A	1.04357	0.978985	1.04955	1.06597	1.07208	1.00573	1.06104	0.937329	1.05211
BMPR1B	1.00621	1.04485	0.206449	0.963017	0.197587	0.205175	1.00849	1.1618	0.199644
BMPR2	0.908855	0.970423	2.13858	0.936555	2.20376	2.35305	0.879849	0.909133	2.24311
BMS1	1.06856	1.00118	0.518937	1.0673	0.518325	0.485642	1.09631	1.00382	0.508708
BMX	1.16138	0.99743	0.21509	1.16437	0.215644	0.185202	1.23224	0.991874	0.206251
BNC1	1.11142	0.996752	0.190454	1.11505	0.191075	0.171361	1.15899	0.989376	0.185138
BNC2	1.19116	0.960427	0.244851	1.24024	0.25494	0.205557	1.28011	0.878264	0.239139
BOC	1.17027	0.953414	0.512809	1.22745	0.537866	0.438198	1.25449	0.866172	0.504305
BPI	0.971991	1.02559	0.668189	0.947743	0.651519	0.687443	0.961235	1.08623	0.661683
BPIFB4	1.01061	0.987846	1.20664	1.02304	1.22149	1.19397	1.01538	0.964109	1.2127
BPTF	1.28257	0.959081	0.0956207	1.3373	0.0997004	0.0745537	1.42355	0.878798	0.0912904
BRAF	1.20616	0.962588	0.322296	1.25303	0.334822	0.267209	1.30835	0.891963	0.312075
BRAP	1.25406	0.936374	0.47287	1.33928	0.505001	0.37707	1.37741	0.816306	0.462357
BRAT1	1.21281	0.919272	0.853888	1.31931	0.928874	0.704059	1.3232	0.779962	0.850092
BRCA1	0.907677	0.957926	2.20084	0.947545	2.2975	2.42469	0.880256	0.870918	2.32976
BRCA2	0.965988	0.963201	1.70881	1.00289	1.7741	1.76898	0.955638	0.883585	1.7728
BRD1	1.40796	0.867119	0.306226	1.62372	0.353153	0.217497	1.67008	0.668359	0.299578
BRD3	1.51684	0.826588	0.214759	1.83507	0.259814	0.141583	1.89895	0.598663	0.209203
BRD4	1.42984	0.877119	0.082205	1.63015	0.0937215	0.0574925	1.71692	0.695645	0.0791659
BRD7	1.1197	0.994712	0.295996	1.12566	0.29757	0.264352	1.16895	0.982548	0.287774
BRD8	1.23089	0.939604	0.517445	1.31001	0.550705	0.420383	1.34164	0.824515	0.507597
BRD9	1.2894	0.905965	0.525225	1.42323	0.579741	0.407341	1.44759	0.744957	0.517864
BRDT	1.11432	1.02201	0.336157	1.09032	0.328917	0.301669	1.15631	1.07583	0.321436
BRF1	1.31027	0.891208	0.667506	1.47022	0.74899	0.509441	1.48375	0.710831	0.661545
BRIP1	1.05343	0.995143	0.79761	1.05857	0.801503	0.757155	1.07273	0.984079	0.789248
BRPF1	1.38009	0.884617	0.255507	1.5601	0.288833	0.185138	1.61681	0.70632	0.248671
BRPF3	1.19598	0.951683	0.27864	1.2567	0.292787	0.232981	1.29865	0.863064	0.272039
BRS3	1.16662	0.973768	0.214589	1.19804	0.220369	0.183941	1.24942	0.922865	0.208177
BRWD1	1.2224	0.962101	0.36861	1.27055	0.38313	0.301547	1.31831	0.880682	0.35814
BRWD3	1.43826	0.889541	0.270901	1.61685	0.304541	0.188354	1.69081	0.708012	0.261517
BSG	1.46116	0.838367	0.694193	1.74287	0.828031	0.475097	1.75561	0.606899	0.687477
BSN	1.05975	1.01289	0.190917	1.04626	0.188487	0.180153	1.08687	1.0405	0.185869
BSND	1.15915	0.954829	0.728201	1.21398	0.76265	0.628221	1.23	0.866124	0.719985
BTAF1	1.37239	0.919481	0.149396	1.49257	0.162479	0.108859	1.57468	0.775663	0.143473
BTBD11	1.21898	0.937543	0.346762	1.30018	0.369863	0.28447	1.33211	0.821627	0.340495
BTBD16	1.08339	0.985504	0.605168	1.09932	0.61407	0.558589	1.1219	0.957151	0.59614
BTBD17	1.34281	0.867698	0.940842	1.54755	1.0843	0.700653	1.54202	0.666435	0.939069
BTBD2	1.52258	0.820222	0.172209	1.85631	0.209954	0.113103	1.90361	0.577578	0.168955
BTBD3	1.2807	0.916544	0.470417	1.39731	0.513251	0.367313	1.43335	0.774359	0.460923
BTBD7	1.13091	0.986087	0.352811	1.14686	0.357789	0.311971	1.18794	0.956161	0.343688
BTBD9	1.20343	0.923798	0.975486	1.3027	1.05595	0.810588	1.29856	0.788021	0.974442
BTK	1.33662	0.828327	1.54794	1.61364	1.86875	1.1581	1.52824	0.605616	1.5908
BTN1A1	1.03051	1.00504	0.662473	1.02534	0.659149	0.642858	1.04306	1.016	0.654286
BTN2A1	1.09666	0.948539	1.25724	1.15616	1.32545	1.14642	1.13825	0.850802	1.26911
BTN2A2	1.05442	0.985647	0.857489	1.06977	0.869976	0.813233	1.07683	0.955552	0.852892
BTN3A1	0.928686	1.03644	0.867576	0.896035	0.837073	0.934197	0.903944	1.12512	0.862962
BTN3A3	1.0375	0.982246	1.03969	1.05626	1.05849	1.00211	1.0532	0.946518	1.04121
BTNL3	1.05742	0.988699	0.802654	1.06951	0.811828	0.759065	1.08109	0.965218	0.795904
BTNL8	1.01387	1.00411	0.836518	1.00972	0.833092	0.825072	1.01924	1.01315	0.830778
BTNL9	1.15218	0.950652	0.802754	1.21199	0.844424	0.696725	1.22153	0.855874	0.79679
BTRC	1.26302	0.926853	0.601722	1.3627	0.64921	0.476415	1.39338	0.796383	0.590309
BUB1	1.04856	1.01662	0.500991	1.03141	0.492798	0.477791	1.0667	1.05612	0.488615
BUB1B	1.07595	1.00821	0.507253	1.06719	0.503123	0.471446	1.10618	1.02638	0.49386
BUD13	0.930027	1.04918	0.598962	0.88643	0.570884	0.644026	0.906095	1.17766	0.589943
BVES	1.01755	1.01317	0.652924	1.00432	0.644437	0.641664	1.02404	1.04447	0.643668
C10orf120	0.896018	1.04819	0.894596	0.85482	0.853464	0.998413	0.863234	1.17012	0.889793
C10orf90	1.00715	1.01694	0.649186	0.990371	0.638369	0.644576	1.00987	1.05641	0.640122
C11orf80	1.20311	0.950817	0.4323	1.26534	0.454662	0.359321	1.30219	0.857115	0.422881
C12orf4	1.07785	0.99321	0.729528	1.08521	0.734515	0.676839	1.1058	0.977581	0.718663
C12orf40	1.04439	0.998113	0.804685	1.04636	0.806206	0.770485	1.0589	0.993355	0.79706
C12orf42	1.0059	1.00109	0.922485	1.00481	0.921483	0.917072	1.00811	1.00362	0.920248
C12orf50	1.03247	1.01491	0.655201	1.01731	0.645578	0.634593	1.04384	1.05062	0.642627
C12orf56	1.04564	0.975493	1.09026	1.07191	1.11766	1.04268	1.0647	0.927856	1.09452
C14orf39	1.17575	0.998271	0.389896	1.17778	0.390571	0.331615	1.23767	0.993925	0.374831
C15orf39	1.01504	1.02278	0.30272	0.992433	0.295978	0.298235	1.02194	1.07047	0.296694
C16orf46	0.962355	1.03087	0.720588	0.933539	0.699012	0.748776	0.948601	1.10462	0.712703
C16orf71	1.00755	1.01801	0.616391	0.989731	0.605488	0.61177	1.01046	1.05984	0.607274
C16orf78	0.895537	1.04633	0.905363	0.855887	0.865278	1.01097	0.862424	1.16668	0.901701
C16orf89	1.07681	0.968698	0.989648	1.11161	1.02163	0.919056	1.11007	0.909947	0.989155
C16orf96	0.938258	1.03289	0.857085	0.908377	0.829789	0.913485	0.915688	1.11097	0.852857
C17orf80	1.29893	0.916615	0.489671	1.4171	0.534216	0.37698	1.4581	0.774095	0.478374
C19orf44	1.07169	0.973089	0.975483	1.10133	1.00246	0.910224	1.10122	0.916504	0.974708
C19orf57	1.03635	1.00004	0.673894	1.0363	0.673865	0.65026	1.05201	1.00013	0.666595
C1orf112	1.02618	1.02469	0.520923	1.00145	0.508373	0.507635	1.03594	1.08297	0.508167
C1orf116	0.859015	1.09058	0.445569	0.787669	0.408562	0.518698	0.810979	1.33625	0.436984
C1orf127	0.982957	1.01551	0.862406	0.96794	0.84923	0.877358	0.9762	1.04873	0.857502
C1orf141	1.13974	0.98819	0.534403	1.15336	0.54079	0.468882	1.19328	0.961465	0.520266
C1orf87	1.04709	0.984739	0.943239	1.06332	0.957857	0.900821	1.06607	0.953642	0.940756
C1orf94	1.02033	1.0114	0.593932	1.00883	0.587237	0.582095	1.02902	1.03572	0.585668
C1QTNF2	0.977183	1.03062	0.53594	0.948147	0.520015	0.548454	0.967649	1.09866	0.52853
C1R	1.18463	0.941126	0.688651	1.25873	0.731731	0.581323	1.27766	0.837515	0.679922
C1RL	1.1663	0.936871	0.961268	1.24489	1.02604	0.8242	1.24317	0.82139	0.959765
C1S	1.11913	0.977239	0.588102	1.1452	0.601799	0.525499	1.17133	0.930741	0.577983
C2	1.19014	0.937453	0.688328	1.26955	0.734254	0.578357	1.28424	0.822517	0.681519
C20orf194	1.10651	0.978138	0.63376	1.13124	0.647926	0.572756	1.15296	0.933396	0.624525
C2CD2	1.28156	0.899854	0.645877	1.42418	0.717758	0.503979	1.44301	0.740439	0.638144
C2CD2L	1.08408	0.996186	0.232609	1.08823	0.2335	0.214569	1.12143	0.987855	0.227639
C2CD3	1.04742	1.0082	0.529138	1.0389	0.524834	0.50518	1.0666	1.02655	0.519055
C2orf16	1.05027	1.00348	0.683648	1.04663	0.681277	0.650925	1.06856	1.01162	0.672906
C2orf42	1.07953	0.990313	0.627218	1.09009	0.633354	0.581011	1.1149	0.971085	0.616791
C2orf78	0.933413	1.05296	0.612714	0.886466	0.581897	0.656424	0.910089	1.18461	0.601776
C3	1.40959	0.861756	0.350969	1.63572	0.407271	0.248986	1.68614	0.667444	0.342657
C3AR1	0.958417	1.02408	0.867261	0.935884	0.846871	0.904889	0.943277	1.08054	0.862868
C3orf20	0.963963	1.02431	0.818045	0.941087	0.798632	0.848627	0.950203	1.07993	0.812842
C4BPA	1.29307	0.937819	0.408295	1.3788	0.435366	0.315757	1.4381	0.82397	0.39487
C5	1.05261	1.00013	0.685216	1.05248	0.685129	0.650969	1.07324	1.00041	0.675199
C5AR1	1.1105	0.956408	0.851948	1.16111	0.890778	0.767178	1.16624	0.878669	0.848314
C5orf34	1.00344	1.01512	0.782525	0.988499	0.77087	0.779839	1.00458	1.05243	0.773182
C6	1.1006	0.983748	0.700693	1.11878	0.712269	0.636648	1.1412	0.949666	0.689728
C6orf118	1.07183	0.972789	0.968348	1.10181	0.995435	0.903452	1.10209	0.918817	0.967071
C7	1.05798	1.00792	0.591963	1.04967	0.587313	0.559522	1.07985	1.02607	0.579468
C7orf31	0.871188	1.07317	0.658061	0.811793	0.613195	0.75536	0.832616	1.27954	0.647014
C8A	0.979358	1.01926	0.830438	0.960856	0.814749	0.847941	0.972013	1.06416	0.823801
C8B	1.06279	0.982632	0.907577	1.08157	0.923618	0.853958	1.08709	0.946305	0.903278
C8orf34	1.01429	1.01912	0.612308	0.995262	0.600819	0.60368	1.01975	1.06307	0.601632
C9	0.989615	1.0109	0.886598	0.978941	0.877035	0.895902	0.986045	1.03704	0.882056
C9orf131	0.955944	1.03789	0.674787	0.921047	0.650154	0.705886	0.940229	1.13	0.665237
C9orf43	1.07395	0.996256	0.611335	1.07798	0.613633	0.569242	1.10448	0.988296	0.600291
C9orf50	1.83037	0.618562	1.53136	2.95908	2.47568	0.836638	2.75624	0.344113	1.56191
CA10	1.23658	0.93909	0.451199	1.31679	0.480465	0.364876	1.35652	0.828392	0.440845
CA4	1.13224	0.961315	0.716759	1.17781	0.745602	0.633043	1.19455	0.889024	0.708503
CA8	1.24056	0.929491	0.558709	1.33466	0.601091	0.450369	1.36825	0.810212	0.547501
CA9	0.987931	1.02098	0.667655	0.967632	0.653936	0.675811	0.982918	1.06669	0.660495
CABIN1	1.13738	0.964451	0.554773	1.1793	0.575222	0.487764	1.20253	0.895369	0.546571
CABP4	1.15347	0.918781	1.58394	1.25543	1.72395	1.3732	1.22637	0.774033	1.6066
CABS1	1.04094	1.00525	0.467731	1.03551	0.465288	0.449334	1.05551	1.0191	0.461049
CACHD1	1.06946	0.999275	0.470295	1.07023	0.470636	0.439751	1.09785	0.997634	0.461526
CACNA1A	1.33634	0.883427	0.606115	1.51267	0.686095	0.453564	1.53373	0.700337	0.598414
CACNA1B	1.19179	0.802679	3.94851	1.48476	4.91916	3.31309	1.29033	0.559547	4.30763
CACNA1C	1.2732	0.745868	4.20318	1.707	5.63528	3.30128	1.43346	0.48402	4.65152
CACNA1D	1.32092	0.90698	0.280474	1.4564	0.309239	0.212332	1.51019	0.756093	0.272911
CACNA1E	1.34184	0.891363	0.240978	1.50538	0.270348	0.179588	1.55583	0.723311	0.235137
CACNA1F	1.10395	0.969533	0.676748	1.13864	0.698014	0.613023	1.15264	0.909948	0.670369
CACNA1G	1.33986	0.887168	0.261639	1.51027	0.294915	0.195273	1.55056	0.710382	0.256517
CACNA1H	1.27559	0.858541	1.85524	1.48577	2.16092	1.45441	1.4299	0.649687	1.89541
CACNA1I	1.42113	0.848359	0.44848	1.67515	0.528644	0.315579	1.70243	0.631419	0.442374
CACNA1S	0.980973	0.961208	2.07455	1.02056	2.15827	2.11479	0.973094	0.890465	2.14471
CACNA2D1	1.03866	0.740687	4.79162	1.40229	6.46915	4.61329	1.05322	0.468066	5.82322
CACNA2D2	1.19219	0.833403	2.71809	1.43051	3.26144	2.27992	1.29172	0.615575	2.89255
CACNA2D3	1.04344	0.779782	4.80249	1.33811	6.15876	4.60257	1.06109	0.526113	5.61319
CACNA2D4	1.00105	0.864354	3.73996	1.15814	4.32688	3.73605	1.00145	0.666175	4.13773
CACNB1	1.15484	0.963569	0.40036	1.19851	0.415497	0.346679	1.23196	0.894617	0.392311
CACNB2	1.18777	0.858539	2.28101	1.38348	2.65685	1.92041	1.27485	0.648846	2.40156
CACNB3	1.24239	0.926184	0.550145	1.34141	0.593991	0.442813	1.36953	0.797312	0.540908
CACNB4	1.04017	0.747211	4.92575	1.39207	6.59218	4.73552	1.05586	0.479449	5.93642
CACNG2	1.31047	0.907738	0.109058	1.44367	0.120143	0.0832205	1.49524	0.754718	0.106325
CACNG3	1.67569	0.76403	0	2.19323	0	0	2.28296	0.501471	0
CACNG4	1.35298	0.862806	0.639561	1.56812	0.741257	0.472705	1.58298	0.66616	0.633537
CACNG5	1.1201	0.968076	0.580179	1.15703	0.599311	0.517972	1.17598	0.904495	0.573043
CACNG7	1.27473	0.922339	0.229323	1.38206	0.248632	0.1799	1.42681	0.786186	0.223971
CACNG8	1.75991	0.728471	0.235933	2.41589	0.323874	0.13406	2.45863	0.438343	0.232544
CAD	1.14286	0.963432	0.374721	1.18623	0.388944	0.327881	1.21684	0.896116	0.367882
CADM1	1.37562	0.885199	0.121395	1.55402	0.137138	0.0882477	1.61475	0.707729	0.118048
CADM2	1.43723	0.864163	0.261806	1.66314	0.302959	0.18216	1.72004	0.661934	0.25508
CADM3	1.28731	0.909358	0.39681	1.41562	0.436363	0.308248	1.45691	0.764809	0.388122
CADPS	1.38983	0.885648	0.387934	1.56928	0.438022	0.279124	1.62186	0.70641	0.377747
CADPS2	1.17713	0.976042	0.39766	1.20602	0.407421	0.337822	1.2548	0.926091	0.385787
CAGE1	1.18445	0.968903	0.56563	1.22247	0.583784	0.477545	1.26066	0.903834	0.55173
CALB2	1.17195	0.959237	0.540174	1.22176	0.563129	0.460917	1.25458	0.882849	0.529161
CALCOCO1	1.1252	0.976884	0.544371	1.15182	0.557252	0.4838	1.18197	0.930928	0.533803
CALCR	0.994281	1.03015	0.613755	0.965177	0.59579	0.617285	0.992088	1.09824	0.601931
CALCRL	1.18575	0.984481	0.249841	1.20444	0.253779	0.210703	1.27126	0.95271	0.240022
CALD1	1.01247	1.05398	0.187149	0.960612	0.177563	0.184844	1.01684	1.20068	0.179472
CALN1	1.33177	0.884756	0.756466	1.50524	0.855	0.568015	1.51559	0.698793	0.749943
CALR	1.45402	0.868245	0.18427	1.67466	0.212233	0.126732	1.74779	0.670611	0.178402
CALR3	1.09277	0.986136	0.704327	1.10813	0.714229	0.644534	1.13058	0.957413	0.693294
CAMK1D	1.56265	0.796764	0.566821	1.96124	0.711404	0.362731	1.98966	0.550141	0.557843
CAMK1G	1.32613	0.884688	0.588854	1.49898	0.665606	0.444038	1.52487	0.71172	0.57988
CAMK2A	1.84158	0.667857	0.531293	2.75745	0.795519	0.288498	2.78436	0.391978	0.522745
CAMK2B	1.558	0.782473	0.5821	1.99112	0.743923	0.373621	2.01163	0.532124	0.575086
CAMK2G	1.36859	0.871449	0.468327	1.57048	0.537412	0.342196	1.60568	0.684376	0.459766
CAMK4	1.2263	0.928584	0.618252	1.32061	0.665801	0.50416	1.34421	0.804852	0.609103
CAMKK1	1.14883	0.96827	0.277408	1.18648	0.286498	0.24147	1.22452	0.908204	0.271187
CAMKK2	1.22953	0.924911	0.554111	1.32935	0.599097	0.450668	1.35225	0.794367	0.546504
CAMKV	1.54316	0.809234	0.0786927	1.90694	0.0972434	0.0509944	1.9804	0.574446	0.0765699
CAMSAP1	1.27779	0.922225	0.315175	1.38555	0.341755	0.246656	1.42658	0.783235	0.30825
CAMSAP2	1.14197	1.02754	0.121584	1.11137	0.118325	0.106468	1.19823	1.09453	0.114935
CAMSAP3	1.31232	0.899526	0.229868	1.45891	0.255544	0.175161	1.50154	0.738015	0.225028
CAMTA1	1.24204	0.937746	0.359307	1.3245	0.38316	0.289287	1.36508	0.821945	0.351119
CAMTA2	1.08995	0.989339	0.400573	1.10169	0.404889	0.367516	1.13283	0.96826	0.392664
CAND1	1.48502	0.859871	0.176743	1.72703	0.205546	0.119017	1.79958	0.649679	0.171279
CAND2	1.15315	0.944043	0.726965	1.2215	0.770055	0.630418	1.23122	0.842505	0.72206
CANT1	1.16943	0.945115	0.753343	1.23734	0.797091	0.644195	1.24955	0.841999	0.746677
CANX	1.22575	0.942664	0.555124	1.30031	0.588888	0.452884	1.33125	0.832215	0.544542
CAP2	1.11182	0.994977	0.379356	1.11743	0.381271	0.341203	1.15961	0.98409	0.369076
CAPN1	1.10379	0.980974	0.553323	1.1252	0.564055	0.501295	1.14988	0.941846	0.544369
CAPN10	1.295	0.898498	0.707216	1.44129	0.78711	0.546113	1.45699	0.73321	0.699405
CAPN11	1.0286	0.991452	0.951608	1.03747	0.959813	0.92515	1.03971	0.973029	0.94974
CAPN12	1.15247	0.926606	1.29841	1.24375	1.40125	1.12663	1.22249	0.793621	1.31114
CAPN13	1.02299	1.01085	0.69011	1.01201	0.682701	0.674599	1.03201	1.03476	0.680347
CAPN14	1.023	1.01478	0.630456	1.00809	0.621272	0.616284	1.03224	1.04698	0.619801
CAPN2	1.06548	0.972095	1.00191	1.09606	1.03067	0.940339	1.09408	0.919433	1.00199
CAPN3	1.02592	0.986597	1.05642	1.03985	1.07077	1.02973	1.0362	0.958397	1.05865
CAPN5	1.09786	0.969861	0.814587	1.13198	0.839901	0.741976	1.14095	0.909907	0.809078
CAPN6	1.25189	0.93437	0.385266	1.33983	0.412327	0.307747	1.3856	0.81891	0.375486
CAPN7	1.10673	0.982718	0.669824	1.12619	0.681604	0.605231	1.1517	0.947724	0.658161
CAPN9	0.975656	1.0179	0.863959	0.958499	0.848766	0.885516	0.966479	1.05817	0.85918
CAPRIN1	1.15797	0.993035	0.294851	1.16609	0.296919	0.254627	1.22924	0.978677	0.28356
CAPRIN2	1.14238	0.991742	0.444223	1.15189	0.447922	0.388858	1.20284	0.974455	0.429862
CAPSL	1.05506	0.995235	0.708739	1.06011	0.712133	0.671753	1.07528	0.983819	0.700998
CARD10	1.25334	0.926566	0.426355	1.35267	0.460145	0.340176	1.39018	0.799404	0.417413
CARD11	1.50226	0.833207	0.204738	1.80299	0.245723	0.136287	1.86743	0.610037	0.199341
CARD14	1.23451	0.927069	0.59373	1.33163	0.640438	0.480944	1.35348	0.795112	0.585696
CARD6	0.873195	1.05959	0.840088	0.824091	0.792846	0.962086	0.835345	1.22058	0.833381
CARD9	1.27528	0.920188	0.522541	1.38589	0.567863	0.409746	1.41538	0.775694	0.513525
CARM1	1.56857	0.812139	0.174711	1.93141	0.215125	0.111382	1.99532	0.567079	0.170413
CARS2	1.13883	0.954069	0.800236	1.19366	0.838762	0.702682	1.20343	0.867484	0.794257
CASC1	1.20673	0.944614	0.746223	1.27749	0.789976	0.618384	1.29567	0.83625	0.736354
CASC3	0.991504	1.04235	0.289939	0.951218	0.278158	0.292424	0.987992	1.13976	0.282375
CASD1	1.11829	0.998215	0.366374	1.12029	0.367029	0.32762	1.16925	0.9944	0.35495
CASK	1.33253	0.875526	0.884644	1.52198	1.01041	0.663882	1.52112	0.686349	0.880464
CASKIN1	1.31113	0.895131	0.234124	1.46473	0.261553	0.178567	1.49962	0.725847	0.23008
CASKIN2	1.07361	0.996221	0.243501	1.07769	0.244425	0.226805	1.10853	0.988479	0.23872
CASP2	1.02987	1.02391	0.274397	1.00583	0.267991	0.266438	1.0421	1.07975	0.267536
CASP5	1.00058	1.01195	0.751028	0.988765	0.742159	0.750592	1.0008	1.03937	0.744567
CASP8	1.08702	0.980679	0.741144	1.10843	0.755746	0.681816	1.12401	0.941239	0.732999
CASP8AP2	1.16787	0.999373	0.125138	1.1686	0.125217	0.107151	1.23349	0.997815	0.12011
CASQ1	0.996899	1.0053	0.933027	0.99164	0.928105	0.93593	0.995719	1.01688	0.930348
CASQ2	1.12444	0.981242	0.556909	1.14594	0.567555	0.495276	1.1757	0.94062	0.545946
CASR	1.23081	0.927927	0.49903	1.3264	0.53779	0.40545	1.35708	0.805741	0.490163
CASS4	1.19893	0.958921	0.251061	1.25029	0.261816	0.209404	1.2966	0.878502	0.244404
CAST	0.985671	1.03794	0.409674	0.949646	0.394701	0.415629	0.980371	1.13291	0.40044
CASZ1	1.34179	0.896774	0.136215	1.49624	0.151895	0.101518	1.53967	0.72098	0.133362
CATSPER1	1.10448	0.974727	0.70656	1.13312	0.724879	0.639723	1.14921	0.922476	0.698663
CATSPER2	0.994594	1.02596	0.661229	0.969431	0.6445	0.664823	0.992537	1.08455	0.650285
CATSPER3	0.999012	1.02132	0.548277	0.978161	0.536834	0.54882	0.99862	1.0707	0.5403
CATSPER4	1.03489	0.992836	0.874754	1.04236	0.881066	0.84526	1.04972	0.978607	0.869983
CATSPERB	1.02322	1.01061	0.689916	1.01248	0.682675	0.674258	1.03164	1.03584	0.680366
CATSPERG	1.14204	0.952922	0.80494	1.19846	0.844707	0.70483	1.2085	0.865435	0.798687
CBFA2T2	1.30063	0.91516	0.326016	1.42121	0.356239	0.250659	1.46921	0.77148	0.317846
CBFA2T3	1.12948	0.971624	0.380472	1.16246	0.391584	0.336857	1.18809	0.911709	0.374361
CBL	1.10906	0.979191	0.543839	1.13263	0.555396	0.49036	1.15796	0.93672	0.534868
CBLB	1.1809	0.967314	0.262071	1.2208	0.270926	0.221925	1.26714	0.901661	0.254955
CBLC	1.12697	0.958385	0.7863	1.1759	0.820444	0.697714	1.18671	0.880611	0.780015
CBLL1	1.20241	0.962856	0.185681	1.2488	0.192844	0.154424	1.3047	0.891647	0.179854
CBLN2	1.54802	0.78293	0.966518	1.97722	1.23449	0.624356	1.9639	0.519346	0.965829
CBLN4	1.35632	0.85274	0.735979	1.59055	0.863076	0.542629	1.59862	0.652532	0.730853
CBS	1.2355	0.913129	0.809017	1.35304	0.885984	0.654808	1.35928	0.763943	0.804423
CBX2	1.22988	0.928638	0.41017	1.32439	0.441689	0.333504	1.34972	0.797625	0.404244
CBX4	1.34542	0.897493	0.196533	1.49909	0.21898	0.146076	1.54548	0.724631	0.192094
CBX6	1.34319	0.883498	0.0849882	1.5203	0.0961951	0.0632736	1.56307	0.703055	0.0833154
CBX8	1.39943	0.874399	0.226017	1.60045	0.258482	0.161506	1.65894	0.687206	0.219993
CC2D1A	1.08769	0.991173	0.368801	1.09737	0.372085	0.339069	1.12894	0.973374	0.361398
CC2D1B	0.948835	1.04937	0.548297	0.904196	0.522502	0.577863	0.928996	1.16399	0.538313
CC2D2A	0.997625	1.01293	0.820666	0.984893	0.810193	0.82262	0.996747	1.04205	0.813678
CCAR1	1.30516	0.938845	0.405478	1.39017	0.431891	0.310674	1.45418	0.826077	0.391161
CCBE1	1.09446	0.95802	1.011	1.14242	1.0553	0.923746	1.13943	0.882191	1.01139
CCDC102A	1.1687	0.963831	0.397162	1.21255	0.412066	0.339833	1.24492	0.888397	0.389294
CCDC102B	0.918344	1.06346	0.641599	0.86354	0.60331	0.698648	0.893707	1.23282	0.626348
CCDC105	1.10242	0.988161	0.452424	1.11563	0.457845	0.410392	1.14686	0.962898	0.443244
CCDC110	1.01412	1.00937	0.829856	1.00471	0.822153	0.818303	1.01846	1.03301	0.821201
CCDC114	1.07724	0.97018	0.993883	1.11035	1.02443	0.922617	1.10931	0.907161	0.993708
CCDC116	1.00318	1.01007	0.717523	0.993176	0.71037	0.715252	1.00439	1.03385	0.711752
CCDC120	1.01271	1.01489	0.47941	0.997845	0.472375	0.473395	1.01823	1.04715	0.472688
CCDC13	1.01776	1.01612	0.600799	1.00161	0.591267	0.590315	1.02477	1.05252	0.590991
CCDC136	1.16465	0.956381	0.762692	1.21777	0.797477	0.654866	1.23435	0.869818	0.753405
CCDC138	1.15621	0.96099	0.713473	1.20314	0.742435	0.617079	1.22221	0.881474	0.703967
CCDC14	1.01236	1.01139	0.770352	1.00095	0.761674	0.760947	1.01676	1.03803	0.761476
CCDC141	1.04364	1.01081	0.707697	1.03247	0.700126	0.678106	1.05898	1.03551	0.694132
CCDC144A	1.14733	0.987814	0.524835	1.16149	0.53131	0.45744	1.20479	0.960815	0.509933
CCDC146	1.05377	0.988966	0.886006	1.06553	0.895891	0.840797	1.07397	0.965802	0.880061
CCDC148	1.06984	1.00067	0.727068	1.06912	0.726579	0.679605	1.09491	1.00216	0.713557
CCDC15	0.913119	1.05554	0.738813	0.86507	0.699936	0.809109	0.886017	1.19779	0.727062
CCDC150	1.07674	0.991519	0.760581	1.08595	0.767086	0.706376	1.10612	0.973591	0.749498
CCDC151	1.11369	0.949894	1.05948	1.17244	1.11536	0.951317	1.16537	0.857882	1.06196
CCDC157	1.1278	0.976023	0.515615	1.1555	0.528281	0.457188	1.18538	0.92747	0.505749
CCDC158	1.02662	1.00678	0.775177	1.01971	0.769961	0.755075	1.03594	1.02268	0.765943
CCDC166	1.17137	0.93802	0.871437	1.24877	0.929018	0.743949	1.25269	0.822788	0.867745
CCDC175	1.10474	0.990052	0.669734	1.11584	0.676463	0.606237	1.14553	0.968948	0.655956
CCDC18	1.2294	1.0048	0.396776	1.22353	0.394881	0.322739	1.3227	1.01469	0.373208
CCDC27	1.15556	0.948818	0.896218	1.21789	0.944563	0.775572	1.22254	0.852242	0.89128
CCDC28A	1.10416	0.965423	0.926368	1.1437	0.959546	0.838981	1.14635	0.894366	0.923376
CCDC30	1.26672	1.00127	0.267113	1.26511	0.266774	0.21087	1.38575	1.00382	0.2491
CCDC33	0.984957	1.01194	0.900003	0.97334	0.889388	0.913749	0.978996	1.03762	0.896541
CCDC38	1.0875	0.993224	0.676256	1.09492	0.68087	0.621843	1.12121	0.978495	0.663824
CCDC39	1.02213	1.03875	0.436468	0.983997	0.420186	0.427019	1.02952	1.14062	0.421941
CCDC40	1.08279	0.983371	0.714432	1.1011	0.726513	0.659806	1.11744	0.94849	0.706269
CCDC50	1.16019	0.970158	0.612728	1.19588	0.631576	0.528128	1.22933	0.910921	0.599304
CCDC54	0.941423	1.02804	0.905128	0.91575	0.880445	0.961447	0.922959	1.0988	0.900754
CCDC57	1.12702	0.961629	0.787858	1.17199	0.819296	0.699066	1.18469	0.889116	0.78044
CCDC6	1.51212	0.837602	0.349979	1.8053	0.417834	0.231448	1.86952	0.618843	0.340055
CCDC60	0.920927	1.04026	0.861916	0.885286	0.828559	0.935922	0.893402	1.13831	0.857224
CCDC61	1.01993	0.99302	0.979245	1.0271	0.986127	0.960106	1.02773	0.977638	0.978579
CCDC62	1.11655	0.980434	0.695052	1.13884	0.708922	0.622497	1.16263	0.938813	0.683511
CCDC63	0.937264	1.03062	0.931455	0.909417	0.90378	0.993802	0.913836	1.10035	0.929099
CCDC66	1.00379	1.0137	0.840338	0.990225	0.828982	0.837165	1.00503	1.04554	0.831113
CCDC68	1.0794	0.994444	0.690621	1.08543	0.69448	0.639818	1.10922	0.982032	0.678997
CCDC73	1.16809	0.981242	0.566625	1.19042	0.577457	0.485087	1.23112	0.938842	0.551379
CCDC8	1.01829	1.01691	0.538883	1.00136	0.529921	0.529204	1.02571	1.05488	0.52971
CCDC80	1.02606	1.01904	0.443732	1.00688	0.43544	0.432465	1.03655	1.06278	0.434572
CCDC81	0.912579	1.04006	0.924006	0.877428	0.888414	1.01252	0.884061	1.1375	0.920393
CCDC82	1.20072	0.982563	0.418576	1.22203	0.426004	0.348605	1.27531	0.940796	0.404528
CCDC83	0.97787	1.04432	0.508661	0.936368	0.487073	0.520173	0.970552	1.16143	0.495519
CCDC85A	1.17238	0.949657	0.69016	1.23453	0.726747	0.588684	1.25106	0.850994	0.682392
CCDC87	1.05702	1.00011	0.541086	1.0569	0.541024	0.511896	1.08217	1.00035	0.531932
CCDC88A	1.27818	0.971526	0.156269	1.31564	0.160849	0.122259	1.40625	0.912196	0.148573
CCDC88B	1.10558	0.969724	0.751661	1.1401	0.775128	0.679877	1.15414	0.912016	0.744223
CCDC88C	1.15336	0.962095	0.519981	1.1988	0.540467	0.450842	1.22559	0.887879	0.511247
CCDC9	1.07355	0.995481	0.520606	1.07843	0.522969	0.484937	1.10449	0.985639	0.511496
CCDC93	1.1072	0.991977	0.49509	1.11615	0.499094	0.447157	1.15362	0.975356	0.483023
CCDC96	1.13594	0.97612	0.49182	1.16373	0.503852	0.432962	1.1957	0.92646	0.481779
CCHCR1	0.996792	1.02061	0.722898	0.976662	0.708299	0.725224	0.995585	1.067	0.713091
CCIN	1.11545	0.97298	0.516693	1.14642	0.531042	0.463217	1.17019	0.919958	0.508873
CCKAR	1.01179	1.01379	0.522098	0.998033	0.514997	0.516012	1.0166	1.04543	0.515295
CCKBR	0.943001	1.03403	0.792652	0.911964	0.766564	0.840563	0.920223	1.11094	0.788151
CCM2	1.23983	0.913887	0.710445	1.35666	0.777388	0.573016	1.36771	0.764914	0.704973
CCNA1	1.16824	0.953535	0.625939	1.22517	0.656441	0.535796	1.24944	0.867644	0.616138
CCNB3	1.01664	1.04058	0.114586	0.977001	0.110118	0.11271	1.02331	1.1399	0.110862
CCND1	1.53227	0.824521	0.375167	1.85838	0.455012	0.244843	1.90058	0.582361	0.368087
CCND2	1.55314	0.791135	0.572468	1.96318	0.723604	0.368587	1.99148	0.549041	0.563274
CCND3	1.31546	0.886778	0.685286	1.48342	0.772782	0.520947	1.49829	0.708558	0.678344
CCNE1	1.41799	0.8948	0.165012	1.5847	0.184412	0.11637	1.66557	0.722595	0.158917
CCNF	1.1853	0.951217	0.489499	1.24609	0.514602	0.412974	1.27627	0.859215	0.480552
CCNJL	1.1806	0.936075	0.812598	1.26123	0.868091	0.68829	1.26877	0.819674	0.807506
CCNL1	1.38148	0.883864	0.410316	1.563	0.46423	0.297012	1.60754	0.700368	0.40103
CCNL2	1.18997	0.944836	0.427635	1.25944	0.452602	0.359367	1.29042	0.846425	0.419918
CCNT1	1.1857	0.964799	0.348472	1.22896	0.361186	0.293896	1.27226	0.893819	0.339498
CCNT2	1.27211	0.943963	0.271628	1.34763	0.287753	0.213525	1.40334	0.833529	0.263328
CCP110	1.12428	0.995798	0.447036	1.12902	0.448922	0.39762	1.1717	0.985922	0.434432
CCPG1	1.16195	0.982951	0.486032	1.1821	0.494462	0.41829	1.22509	0.944302	0.472534
CCR2	1.02716	1.00178	0.712689	1.02533	0.71142	0.693843	1.03907	1.00544	0.705936
CCR3	1.08805	0.980462	0.561983	1.10973	0.573182	0.516504	1.12846	0.940812	0.555072
CCR4	1.28332	0.897898	0.610602	1.42925	0.680035	0.475798	1.45234	0.741618	0.602043
CCR5	0.88695	1.06063	0.826958	0.836247	0.779685	0.932361	0.846875	1.20558	0.821016
CCR6	1.39288	0.854796	0.572089	1.62949	0.669269	0.410724	1.65739	0.65679	0.563039
CCR7	1.37515	0.874031	0.185768	1.57335	0.212541	0.135088	1.62471	0.688782	0.181436
CCR9	1.07024	1.00322	0.341921	1.06681	0.340823	0.319479	1.10126	1.01013	0.334209
CCSER2	1.03727	1.02959	0.344063	1.00745	0.334174	0.331702	1.0504	1.10705	0.333519
CCT3	1.02262	1.03799	0.0887408	0.985192	0.0854932	0.0867782	1.03182	1.12989	0.0858662
CCT5	1.24959	0.944574	0.101895	1.32291	0.107874	0.0815429	1.37589	0.836613	0.0989977
CCT6A	1.26446	0.933445	0.150929	1.35462	0.161691	0.119363	1.40256	0.808493	0.147105
CCT6B	1.10157	0.983198	0.553457	1.12039	0.562916	0.502426	1.14338	0.945859	0.544939
CCT8	1.19073	0.96623	0.221264	1.23235	0.228997	0.185821	1.2782	0.895114	0.215319
CCT8L2	1.07043	0.978313	0.813416	1.09415	0.831447	0.759899	1.10293	0.936746	0.808225
CD101	1.0729	0.995232	0.656649	1.07804	0.659795	0.612032	1.10267	0.985166	0.645495
CD109	1.00928	1.00736	0.826372	1.00191	0.820333	0.818771	1.01263	1.02446	0.819904
CD163	1.20368	0.956765	0.52482	1.25807	0.548536	0.436013	1.29579	0.871517	0.512592
CD163L1	1.02732	0.993378	0.945924	1.03416	0.95223	0.920773	1.03716	0.978464	0.943524
CD180	1.02446	1.01087	0.605637	1.01345	0.599127	0.591175	1.03428	1.03525	0.596799
CD19	1.22026	0.940377	0.443287	1.29763	0.471393	0.363273	1.33195	0.83067	0.434436
CD1A	1.03349	0.971929	1.20602	1.06334	1.24086	1.16695	1.04703	0.918436	1.21831
CD1B	0.975391	1.0268	0.791298	0.949931	0.770644	0.811262	0.965714	1.08316	0.782586
CD1C	0.958485	1.03025	0.825783	0.930343	0.801537	0.86155	0.943357	1.09806	0.818258
CD1D	1.06853	1.00445	0.55265	1.06379	0.550199	0.517208	1.09767	1.01367	0.540078
CD1E	1.04279	0.97179	1.126	1.07306	1.15868	1.07979	1.06112	0.920923	1.1336
CD2	1.05825	1.01017	0.409673	1.04759	0.405548	0.387123	1.08238	1.03293	0.400063
CD200R1L	1.11456	0.968622	0.768571	1.15067	0.793469	0.689571	1.16381	0.905283	0.761247
CD209	0.96189	1.01369	1.03529	0.9489	1.02131	1.07631	0.947406	1.04147	1.03733
CD22	1.2184	0.947138	0.474379	1.2864	0.500855	0.389347	1.32599	0.849285	0.463274
CD226	1.07891	1.01428	0.306276	1.06373	0.301965	0.283874	1.1103	1.04789	0.296747
CD248	1.16908	0.953371	0.514607	1.22625	0.539776	0.440183	1.25281	0.866083	0.50622
CD276	1.20602	0.920028	0.866008	1.31085	0.941285	0.718072	1.31393	0.782972	0.862609
CD2AP	1.03115	1.02961	0.290482	1.0015	0.282128	0.281706	1.0431	1.10242	0.28201
CD300LB	1.14266	0.958266	0.77058	1.19242	0.80414	0.674377	1.20756	0.88026	0.762055
CD300LG	1.02465	1.00868	0.627601	1.01583	0.622201	0.612505	1.03505	1.02723	0.619258
CD33	0.921892	1.04204	0.799181	0.884701	0.76694	0.866892	0.894224	1.1461	0.793787
CD36	0.746077	1.06599	1.55237	0.699891	1.45627	2.08071	0.681534	1.24494	1.59188
CD4	1.16708	0.970506	0.320865	1.20255	0.330616	0.274929	1.25016	0.914547	0.311878
CD44	1.12346	0.982891	0.468015	1.14302	0.476162	0.416582	1.17531	0.945483	0.458217
CD5	1.14579	0.966864	0.559435	1.18506	0.578608	0.48825	1.21383	0.9028	0.549189
CD5L	1.09245	0.946482	1.21845	1.15422	1.28734	1.11534	1.13087	0.850347	1.23339
CD6	1.27526	0.901452	0.805982	1.41467	0.894093	0.632015	1.42176	0.737205	0.800469
CD79B	1.47619	0.817806	0.738253	1.80507	0.902724	0.500106	1.81446	0.589236	0.730651
CD84	0.981295	1.04998	0.358516	0.934588	0.341451	0.365349	0.974059	1.16956	0.348224
CD86	1.04217	1.02829	0.277078	1.0135	0.269454	0.265866	1.05782	1.1002	0.268472
CD93	1.17756	0.930102	0.96964	1.26605	1.04251	0.823434	1.26381	0.803733	0.968727
CD96	1.05461	1.0066	0.5882	1.04769	0.584343	0.557742	1.07496	1.02214	0.576924
CDAN1	1.11267	0.970927	0.585303	1.14599	0.602829	0.526035	1.1666	0.915038	0.577502
CDC14A	1.07275	0.989638	0.628975	1.08398	0.635561	0.586319	1.10474	0.968468	0.620165
CDC16	1.34968	0.904003	0.456693	1.49301	0.505189	0.33837	1.53949	0.742238	0.445264
CDC20B	1.05675	1.0027	0.6376	1.0539	0.63588	0.603357	1.07848	1.00883	0.626605
CDC23	1.3639	0.894003	0.366645	1.5256	0.410116	0.268822	1.58223	0.728998	0.356262
CDC25B	1.28723	0.911744	0.351611	1.41184	0.385646	0.273152	1.44512	0.75771	0.345359
CDC27	1.23864	0.940151	0.590893	1.31749	0.628509	0.477051	1.35337	0.831793	0.577753
CDC37	1.34985	0.91454	0.259439	1.47599	0.283683	0.192198	1.53405	0.759337	0.251804
CDC40	1.36887	0.917643	0.237646	1.49173	0.258974	0.173607	1.56618	0.771133	0.228883
CDC42BPA	1.16422	1.01161	0.244646	1.15086	0.241838	0.210136	1.23293	1.03733	0.232335
CDC42BPB	1.41577	0.877028	0.196285	1.61429	0.223807	0.138641	1.68094	0.689994	0.1904
CDC45	1.0955	0.985723	0.552442	1.11137	0.560443	0.504282	1.13435	0.953632	0.543894
CDC5L	1.47233	0.884118	0.15568	1.66531	0.176085	0.105737	1.76033	0.70007	0.149235
CDC7	1.0918	0.989546	0.626455	1.10334	0.633072	0.57378	1.12673	0.965399	0.616285
CDC73	0.782685	1.12961	0.39253	0.692883	0.347493	0.501517	0.725756	1.56943	0.380119
CDCA2	1.09992	0.994586	0.42683	1.10591	0.429154	0.388056	1.13967	0.982013	0.417262
CDCA7	1.07661	0.999597	0.485153	1.07705	0.485349	0.45063	1.10681	0.998662	0.475346
CDCA7L	1.13049	0.96165	0.767645	1.17557	0.798258	0.679038	1.18772	0.884951	0.760844
CDCP1	1.10558	0.971683	0.646761	1.1378	0.665609	0.584996	1.15461	0.916025	0.639521
CDCP2	1.01791	0.982432	1.2375	1.03611	1.25963	1.21573	1.02553	0.947295	1.24605
CDH1	1.12398	0.957851	0.794247	1.17344	0.829197	0.706641	1.18231	0.877812	0.788977
CDH10	1.25355	0.924884	0.549209	1.35536	0.593814	0.438123	1.38368	0.79097	0.539921
CDH11	1.17465	0.965291	0.136593	1.21689	0.141505	0.116284	1.26212	0.897235	0.133055
CDH12	1.11986	0.981962	0.454483	1.14043	0.462832	0.405841	1.17308	0.944429	0.445002
CDH13	1.25465	0.924509	0.298186	1.3571	0.322535	0.237664	1.39581	0.793385	0.292
CDH15	1.1528	0.939767	0.950549	1.22669	1.01147	0.824557	1.22616	0.82782	0.949258
CDH16	1.03519	0.996051	0.75414	1.03929	0.75713	0.728505	1.04984	0.987517	0.748521
CDH17	1.01225	1.00845	0.737473	1.00376	0.731291	0.728548	1.01705	1.02749	0.730498
CDH18	1.12636	0.977906	0.4449	1.1518	0.454952	0.394991	1.1819	0.931068	0.43636
CDH19	1.03168	1.01097	0.617503	1.02049	0.610805	0.598539	1.04345	1.03697	0.607395
CDH2	1.24464	0.924303	0.559339	1.34657	0.605147	0.449398	1.37407	0.793443	0.550131
CDH20	1.24972	0.939291	0.209043	1.33049	0.222553	0.167272	1.38165	0.827963	0.203305
CDH22	1.33469	0.877618	0.73405	1.52081	0.836411	0.549976	1.52883	0.681425	0.729436
CDH23	1.12158	0.964255	0.540971	1.16316	0.561025	0.482329	1.18037	0.894462	0.535043
CDH24	1.11577	0.958244	0.839911	1.16439	0.876511	0.752763	1.17054	0.87952	0.835733
CDH26	1.06741	0.976111	0.934929	1.09353	0.957811	0.875888	1.09595	0.928212	0.932549
CDH3	1.18178	0.941203	0.579446	1.2556	0.615643	0.490317	1.27517	0.834796	0.572393
CDH4	1.34041	0.890013	0.245311	1.50606	0.275626	0.183012	1.54839	0.714981	0.240267
CDH5	1.21029	0.931869	0.574389	1.29878	0.616384	0.474586	1.32005	0.810868	0.5669
CDH6	1.30712	0.906456	0.421201	1.44202	0.464668	0.322235	1.48461	0.75544	0.41164
CDH7	1.32565	0.903814	0.37488	1.46673	0.414776	0.282789	1.51376	0.747246	0.365743
CDH8	1.30257	0.920237	0.217702	1.41548	0.236572	0.167132	1.4689	0.779821	0.211753
CDH9	1.25162	0.941336	0.356706	1.32962	0.378936	0.284996	1.37342	0.827321	0.347874
CDHR1	1.1361	0.934272	1.24809	1.21603	1.3359	1.09858	1.2023	0.816116	1.25582
CDHR2	1.13001	0.959178	0.646594	1.1781	0.674113	0.572205	1.19249	0.880517	0.64046
CDHR3	1.06231	0.970579	1.06642	1.09451	1.09875	1.00387	1.08965	0.913297	1.06878
CDHR4	1.07522	0.968956	0.993123	1.10967	1.02494	0.923642	1.10839	0.90842	0.992888
CDHR5	1.21754	0.917646	0.741598	1.32681	0.808152	0.609093	1.33646	0.779355	0.736376
CDK11A	1.28493	0.910728	0.775421	1.41088	0.851431	0.603474	1.42613	0.760523	0.765717
CDK12	1.1561	0.982374	0.114351	1.17685	0.116403	0.0989108	1.23309	0.947307	0.110601
CDK13	1.21193	0.944837	0.373338	1.28269	0.395134	0.308051	1.32458	0.84719	0.364484
CDK14	1.21322	0.936317	0.546456	1.29574	0.583623	0.450418	1.32333	0.823219	0.537349
CDK15	1.067	0.977739	0.910851	1.0913	0.931589	0.853654	1.0958	0.934503	0.907204
CDK17	1.34287	0.90502	0.343639	1.4838	0.379704	0.2559	1.54151	0.751302	0.333593
CDK18	1.01049	1.00074	0.875836	1.00974	0.87519	0.866748	1.01479	1.00234	0.872671
CDK19	1.39372	0.887727	0.286931	1.56998	0.32322	0.205875	1.63831	0.71649	0.277671
CDK5RAP1	1.14107	0.938115	1.14967	1.21635	1.22551	1.00753	1.20432	0.821476	1.15543
CDK5RAP2	1.05465	1.00746	0.567519	1.04684	0.563317	0.538113	1.0764	1.024	0.555949
CDK6	1.50676	0.834143	0.216993	1.80636	0.260139	0.144013	1.87722	0.614536	0.210704
CDK8	1.65284	0.767435	0.652255	2.15372	0.849915	0.394627	2.17511	0.511105	0.641037
CDKAL1	1.20812	0.948582	0.541299	1.2736	0.57064	0.448051	1.30688	0.851122	0.530237
CDKL2	0.946094	1.01275	1.137	0.934182	1.12268	1.20178	0.928204	1.0435	1.1433
CDKL5	0.97009	0.9855	1.45116	0.984363	1.47251	1.49591	0.959309	0.955143	1.47909
CDKN1A	0.822707	1.07661	1.02142	0.764164	0.948734	1.24153	0.766003	1.2775	1.02217
CDKN1B	1.20629	0.968258	0.187137	1.24584	0.193272	0.155135	1.30405	0.903552	0.180916
CDKN2A	1.07853	0.952814	1.56756	1.13195	1.64518	1.45341	1.11173	0.85664	1.58632
CDON	1.02458	1.01231	0.564136	1.01212	0.557277	0.550604	1.03426	1.0407	0.555353
CDR1	1.02887	0.992258	0.950459	1.0369	0.957875	0.923787	1.03994	0.976201	0.947951
CDS1	0.995502	1.03338	0.513716	0.963347	0.497123	0.516037	0.9938	1.1123	0.502436
CDX4	1.02993	1.01087	0.545736	1.01885	0.539866	0.529876	1.04147	1.03661	0.537033
CDYL	1.39703	0.865503	0.513585	1.61413	0.593395	0.367626	1.64347	0.663205	0.505491
CDYL2	1.29492	0.906513	0.437544	1.42847	0.482668	0.337892	1.46363	0.752997	0.429206
CEACAM1	1.07616	0.992627	0.573044	1.08415	0.5773	0.53249	1.10947	0.977416	0.563356
CEACAM16	1.18051	0.941823	0.656303	1.25343	0.696843	0.555949	1.26973	0.834145	0.649288
CEACAM18	1.04439	1.00111	0.638568	1.04323	0.63786	0.611426	1.06157	1.00368	0.630316
CEACAM20	1.11367	0.971401	0.663756	1.14646	0.683297	0.596008	1.16424	0.913616	0.655783
CEACAM5	1.12825	0.960094	0.741617	1.17515	0.772442	0.657315	1.18888	0.885303	0.734465
CEACAM6	1.1731	0.956686	0.454094	1.22621	0.474653	0.387089	1.26193	0.87851	0.444432
CEACAM7	0.91637	1.043	0.865656	0.878587	0.829965	0.944658	0.887254	1.14629	0.86068
CEACAM8	1.01122	1.01277	0.693306	0.998472	0.684566	0.685614	1.01565	1.04122	0.684871
CEBPA	1.4278	0.856676	0.695123	1.66668	0.811418	0.486848	1.67561	0.624204	0.690606
CEBPZ	1.17698	0.9905	0.265408	1.18827	0.267953	0.225499	1.24969	0.968811	0.255423
CECR2	1.09142	1.01039	0.19892	1.0802	0.196874	0.182257	1.13144	1.03324	0.192388
CEL	1.16526	0.947043	0.591918	1.23042	0.625016	0.507972	1.24621	0.845672	0.585973
CELF1	1.33052	0.911527	0.147581	1.45966	0.161905	0.11092	1.5258	0.765256	0.142865
CELF2	1.69007	0.758253	0.110076	2.2289	0.14517	0.0651309	2.33737	0.504895	0.106265
CELF3	1.47119	0.826146	0.587411	1.78079	0.711025	0.399276	1.80594	0.600947	0.578855
CELF4	1.31711	0.895603	0.48282	1.47064	0.5391	0.366576	1.50144	0.727494	0.474681
CELF5	1.72003	0.746238	0.149874	2.30493	0.200839	0.0871347	2.38233	0.475173	0.146121
CELF6	1.23039	0.924445	0.45775	1.33095	0.495162	0.372038	1.35808	0.795512	0.450681
CELSR1	1.28254	0.912918	0.289668	1.40488	0.317299	0.225856	1.43805	0.7595	0.284605
CELSR2	1.20651	0.938138	0.303408	1.28607	0.323415	0.251476	1.31964	0.829111	0.297746
CELSR3	1.20895	0.941559	0.232833	1.28399	0.247285	0.192591	1.32149	0.835973	0.228019
CENPB	1.55253	0.816025	0.264953	1.90255	0.324687	0.170659	1.96176	0.576189	0.258579
CENPE	1.19662	1.00429	0.222633	1.19151	0.221683	0.186052	1.27288	1.0146	0.211584
CENPF	1.09628	1.03815	0.391677	1.05599	0.377284	0.357279	1.1319	1.12639	0.371704
CENPI	1.12517	1.01897	0.0484939	1.10422	0.0475909	0.0430991	1.18042	1.06148	0.0462121
CENPJ	1.00109	1.01618	0.771727	0.985152	0.759437	0.770883	1.00148	1.05442	0.762516
CEP104	1.04192	1.02423	0.409476	1.01728	0.399791	0.393	1.05873	1.0793	0.397809
CEP112	1.04858	1.01506	0.63593	1.03302	0.626494	0.606469	1.06588	1.04989	0.62102
CEP120	0.951228	1.04837	0.624132	0.907341	0.595336	0.656133	0.934507	1.16788	0.611385
CEP128	1.03163	1.01603	0.662211	1.01535	0.651761	0.641905	1.04292	1.05337	0.649068
CEP135	1.04856	1.00548	0.730376	1.04285	0.726398	0.696551	1.06497	1.01859	0.71853
CEP152	1.06399	1.01099	0.615969	1.05242	0.609271	0.578926	1.08709	1.03628	0.600905
CEP164	1.06345	0.992235	0.720194	1.07178	0.725831	0.677223	1.08938	0.975803	0.711282
CEP170	1.14318	1.00079	0.318708	1.14228	0.318457	0.278792	1.1999	1.00262	0.307008
CEP192	1.01644	1.01926	0.576436	0.997227	0.565541	0.567114	1.02243	1.06616	0.565972
CEP250	1.09941	0.98786	0.657416	1.11292	0.665495	0.597972	1.14145	0.963553	0.644679
CEP290	1.06262	0.986824	0.908121	1.07681	0.920246	0.854607	1.08422	0.958235	0.902357
CEP350	1.0685	1.04857	0.207175	1.019	0.197578	0.193894	1.09303	1.17541	0.196594
CEP57	1.25572	0.939244	0.559298	1.33695	0.595477	0.445399	1.37783	0.8282	0.545451
CEP63	0.967368	1.0128	0.988462	0.955147	0.975974	1.02181	0.956826	1.04291	0.987804
CEP68	1.05494	1.00458	0.444269	1.05012	0.442242	0.421133	1.07791	1.0148	0.435925
CEP70	1.06551	1.01001	0.644935	1.05494	0.63854	0.605283	1.08875	1.03298	0.629452
CEP72	1.18608	0.942341	0.671918	1.25865	0.71303	0.566504	1.27622	0.835126	0.664067
CEP76	1.0175	1.01226	0.728642	1.00517	0.719817	0.716113	1.02377	1.04103	0.718804
CEP78	0.93829	1.02709	0.950848	0.913546	0.925773	1.01338	0.917061	1.09287	0.949028
CEP85	1.05661	1.00805	0.613803	1.04817	0.608903	0.580919	1.07857	1.02579	0.600818
CEP85L	1.19527	0.987356	0.375982	1.21058	0.380797	0.314558	1.27436	0.959387	0.361252
CEP89	1.09271	0.974376	0.837012	1.12144	0.859023	0.765997	1.13151	0.923188	0.830476
CEP95	1.01886	1.01317	0.724413	1.00562	0.714997	0.711004	1.02547	1.04448	0.713922
CEP97	1.10664	0.983963	0.675757	1.12468	0.68677	0.610638	1.14954	0.950106	0.664149
CER1	1.03917	1.00604	0.533571	1.03293	0.530366	0.513457	1.05399	1.02075	0.525646
CERCAM	1.12228	0.965759	0.699306	1.16207	0.7241	0.623111	1.17701	0.897024	0.692128
CERK	1.23427	0.927789	0.601115	1.33033	0.6479	0.487022	1.35454	0.800168	0.59209
CERKL	0.987688	1.00347	1.02343	0.984273	1.01989	1.03618	0.983248	1.0114	1.02438
CES2	1.5027	0.810695	0.637811	1.85359	0.786746	0.424443	1.87269	0.575409	0.629705
CES3	1.06991	0.976879	0.889733	1.09523	0.910791	0.831596	1.09996	0.930229	0.88623
CES4A	1.03292	0.991303	0.909255	1.04198	0.917232	0.880274	1.04672	0.97371	0.905917
CES5A	1.00256	0.988571	1.20428	1.01415	1.2182	1.20121	1.00364	0.966277	1.21292
CETN1	1.17919	0.933454	0.951786	1.26326	1.01964	0.807151	1.26239	0.805114	0.95058
CETP	1.015	0.995383	0.962237	1.01971	0.9667	0.948018	1.02119	0.985677	0.961069
CFB	1.2287	0.944726	0.380004	1.30059	0.402237	0.309273	1.34875	0.846701	0.369705
CFH	1.30258	0.969994	0.264048	1.34288	0.272216	0.20271	1.4367	0.907733	0.250477
CFHR1	1.29085	0.931642	0.665854	1.38556	0.714711	0.515827	1.42493	0.812341	0.64874
CFHR3	1.09425	0.986257	0.807872	1.1095	0.819129	0.738289	1.12895	0.957995	0.796032
CFHR4	1.13768	0.987964	0.665414	1.15154	0.673521	0.584888	1.19007	0.963038	0.647804
CFHR5	1.05172	1.00524	0.772604	1.04625	0.76858	0.734607	1.0693	1.01699	0.759467
CFI	1.09927	0.9826	0.738764	1.11874	0.751847	0.672049	1.13754	0.944753	0.728799
CFP	1.29567	0.913244	0.595233	1.41875	0.651779	0.459403	1.45374	0.770758	0.582683
CFTR	0.721645	1.05649	1.78837	0.68306	1.69275	2.47819	0.653635	1.20106	1.86123
CGN	0.924483	1.04175	0.862856	0.887435	0.828277	0.933338	0.898318	1.13858	0.856554
CGNL1	0.957565	1.03405	0.725894	0.926032	0.70199	0.758063	0.942736	1.11724	0.716983
CHAD	1.03966	1.00809	0.373223	1.03132	0.370229	0.358985	1.05758	1.02515	0.366694
CHAF1A	1.34324	0.90774	0.130267	1.47976	0.143507	0.0969797	1.53984	0.749642	0.126488
CHAF1B	1.18116	0.95605	0.397447	1.23546	0.415718	0.336489	1.27019	0.871832	0.389257
CHAT	1.07109	0.972833	0.947022	1.101	0.973468	0.884164	1.10222	0.918347	0.945485
CHD1	1.4277	0.919318	0.15209	1.553	0.165438	0.106528	1.65104	0.770313	0.145061
CHD1L	0.994368	1.03087	0.594847	0.964588	0.577033	0.598216	0.992242	1.1021	0.583006
CHD2	1.38441	0.874353	0.663952	1.58335	0.759364	0.479592	1.60842	0.685675	0.653001
CHD3	1.43022	0.859279	0.288015	1.66444	0.335183	0.201378	1.72344	0.661682	0.280367
CHD4	1.52038	0.833992	0.173575	1.82301	0.208126	0.114166	1.90246	0.613923	0.16808
CHD6	1.17964	0.973026	0.191794	1.21234	0.197111	0.162587	1.26624	0.918912	0.185798
CHD7	1.13685	0.948974	0.946489	1.19798	0.997382	0.832556	1.19816	0.854217	0.944224
CHD8	0.954222	0.717999	5.87791	1.329	8.18651	6.1599	0.937763	0.448267	7.47508
CHD9	1.22113	0.977889	0.198777	1.24874	0.203271	0.162781	1.32025	0.930819	0.190611
CHDH	1.17703	0.943339	0.72262	1.24773	0.766023	0.613935	1.26241	0.838734	0.715219
CHEK1	1.00654	1.01426	0.758612	0.992389	0.747948	0.753685	1.00894	1.04669	0.74955
CHEK2	0.868085	1.04928	1.03631	0.827314	0.987635	1.19378	0.827895	1.17827	1.03793
CHERP	1.53695	0.836593	0.174368	1.83715	0.208427	0.113451	1.92236	0.615476	0.168457
CHFR	1.21872	0.933995	0.602027	1.30485	0.644572	0.493982	1.32979	0.816534	0.592663
CHGB	1.1466	0.972715	0.616039	1.17877	0.633319	0.537273	1.20745	0.915531	0.604285
CHI3L1	1.11644	0.957449	0.877465	1.16606	0.916461	0.785946	1.17079	0.877898	0.873636
CHIA	0.988664	1.00865	0.938063	0.980182	0.930014	0.948819	0.984111	1.02666	0.935616
CHIT1	1.0501	1.00086	0.64656	1.04919	0.646001	0.615715	1.07104	1.00269	0.636826
CHL1	1.01728	1.044	0.249328	0.974405	0.23882	0.245093	1.0237	1.1557	0.24054
CHM	1.19709	0.925197	1.07064	1.29387	1.1572	0.894373	1.2818	0.785446	1.0742
CHML	1.38435	0.931544	0.240387	1.48608	0.258053	0.173647	1.58306	0.807587	0.228849
CHN1	1.15773	0.969063	0.405908	1.1947	0.418866	0.350605	1.23044	0.906323	0.397007
CHN2	1.10156	0.986495	0.486911	1.11664	0.493577	0.442018	1.14538	0.957655	0.47776
CHPF	1.2092	0.924696	0.59921	1.30767	0.648008	0.495542	1.32667	0.800102	0.592228
CHPF2	0.978499	1.0117	0.959876	0.967184	0.948777	0.980969	0.969518	1.03587	0.95857
CHRD	1.12291	0.968447	0.507975	1.15949	0.524525	0.452375	1.18261	0.907676	0.500581
CHRDL1	1.05546	1.01994	0.403575	1.03483	0.395686	0.382367	1.07706	1.06658	0.39188
CHRDL2	1.29081	0.889643	0.907801	1.45093	1.02041	0.703282	1.44949	0.713347	0.904758
CHRM1	1.44357	0.848716	0.21097	1.70089	0.248575	0.146144	1.76516	0.646149	0.20521
CHRM2	1.21222	0.940249	0.377584	1.28925	0.401578	0.311482	1.32457	0.83318	0.370012
CHRM3	1.34995	0.888116	0.234328	1.52002	0.263849	0.173583	1.57843	0.722602	0.227894
CHRM4	1.43179	0.846907	0.211104	1.69061	0.249264	0.147441	1.74102	0.638145	0.206526
CHRM5	0	1.45118	0.558128	0	0.384603		0	22.3859	0.548605
CHRNA1	1.06299	0.980736	0.851379	1.08387	0.868102	0.800929	1.09057	0.942113	0.847053
CHRNA10	1.14022	0.944061	0.920651	1.20778	0.975203	0.807433	1.20887	0.841285	0.918719
CHRNA2	1.08119	0.976932	0.761517	1.10672	0.779499	0.704332	1.11729	0.930345	0.755809
CHRNA3	1.29607	0.886594	0.687611	1.46185	0.775565	0.530536	1.47832	0.720067	0.679898
CHRNA4	1.30414	0.890031	0.676393	1.46527	0.759966	0.518651	1.47869	0.712917	0.670322
CHRNA5	1.1094	0.98442	0.577695	1.12696	0.586838	0.520727	1.15294	0.949432	0.567566
CHRNA6	1.04409	0.994497	0.781274	1.04987	0.785598	0.748281	1.06142	0.982306	0.774757
CHRNA9	1.0669	0.993412	0.595725	1.07398	0.599676	0.558368	1.09544	0.979408	0.587062
CHRNB1	1.02438	1.00815	0.605836	1.0161	0.600939	0.591419	1.0348	1.02555	0.59803
CHRNB2	1.25538	0.902634	0.80853	1.3908	0.895745	0.644051	1.39624	0.741849	0.804288
CHRNB3	1.12893	0.95842	0.842083	1.1779	0.878616	0.745915	1.18602	0.878229	0.836431
CHRNB4	1.26369	0.917005	0.351925	1.37806	0.383777	0.27849	1.41346	0.777165	0.345244
CHRND	1.07384	0.98789	0.551543	1.08701	0.558304	0.513616	1.10724	0.963039	0.544157
CHRNG	0.932888	1.03005	0.971824	0.905673	0.943474	1.04174	0.908269	1.09905	0.970802
CHST1	1.40962	0.857343	0.470836	1.64418	0.54918	0.334015	1.67475	0.649216	0.463457
CHST10	1.28851	0.891723	0.762031	1.44497	0.85456	0.591405	1.45525	0.724325	0.755551
CHST11	1.21599	0.937442	0.471375	1.29713	0.502831	0.387648	1.3314	0.828922	0.462007
CHST12	1.28866	0.91066	0.459393	1.41508	0.504462	0.35649	1.44466	0.754993	0.451822
CHST13	1.13947	0.955705	0.659295	1.19228	0.689852	0.578599	1.20484	0.867817	0.65377
CHST15	1.16007	0.957578	0.592134	1.21147	0.618367	0.510429	1.23609	0.876787	0.58282
CHST2	1.24522	0.912388	0.552567	1.3648	0.605627	0.443749	1.38737	0.771272	0.545253
CHST3	1.26869	0.919031	0.492792	1.38046	0.536209	0.388427	1.40958	0.775086	0.484545
CHST4	0.966299	1.01412	0.987729	0.952847	0.973979	1.02218	0.954297	1.04635	0.987191
CHST5	1.21007	0.929265	0.590831	1.30218	0.635805	0.488262	1.32017	0.803357	0.584251
CHST6	1.07431	0.956645	1.30282	1.123	1.36187	1.2127	1.10736	0.874	1.31423
CHST7	1.46766	0.832074	0.4262	1.76385	0.512214	0.290395	1.79628	0.603982	0.419619
CHST8	1.08668	0.981163	0.564418	1.10754	0.575254	0.519397	1.12507	0.941459	0.557851
CHST9	0.976904	1.02749	0.734287	0.950765	0.714639	0.751647	0.968693	1.09253	0.724697
CHSY1	1.2603	0.931268	0.361865	1.35332	0.388572	0.287126	1.39768	0.808593	0.353043
CHSY3	1.14969	0.973576	0.425183	1.18089	0.436722	0.369824	1.21989	0.92152	0.414985
CHTF18	1.25593	0.910537	0.622344	1.37933	0.683492	0.495525	1.39641	0.759274	0.61571
CHUK	1.27207	0.936883	0.427574	1.35777	0.456379	0.336125	1.4042	0.817693	0.416295
CIC	1.21182	0.929408	0.216749	1.30386	0.233212	0.178862	1.33834	0.813733	0.212785
CILP	0.897627	1.03796	1.08402	0.864795	1.04437	1.20765	0.863101	1.13243	1.08702
CILP2	1.0959	0.974541	0.631519	1.12453	0.648016	0.576256	1.13939	0.922563	0.625244
CIZ1	1.15416	0.972902	0.51109	1.18631	0.525325	0.442823	1.2256	0.920692	0.498531
CKAP2	1.13167	0.978957	0.613633	1.156	0.626823	0.542237	1.18289	0.93172	0.602449
CKAP2L	0.970026	1.04383	0.543115	0.929297	0.520311	0.559897	0.959439	1.15271	0.530919
CKAP4	1.31587	0.917058	0.288681	1.43488	0.31479	0.219385	1.48445	0.768542	0.281243
CKAP5	1.17323	0.979597	0.0978208	1.19766	0.0998582	0.0833775	1.25775	0.938484	0.0944334
CKM	1.37966	0.87179	0.29552	1.58256	0.338981	0.214198	1.62233	0.677701	0.289938
CKMT2	1.38306	0.819682	1.28513	1.68731	1.56785	0.9292	1.6434	0.596978	1.29788
CLASP1	1.27416	0.922622	0.297795	1.38102	0.322771	0.233719	1.42702	0.78982	0.290565
CLASP2	1.29861	0.923222	0.31875	1.4066	0.345258	0.245456	1.45704	0.786141	0.310228
CLASRP	1.26501	0.914127	0.580072	1.38385	0.634564	0.45855	1.40841	0.768606	0.571502
CLCA1	1.0516	1.0095	0.564315	1.04171	0.559006	0.536624	1.07231	1.03034	0.55242
CLCA2	1.11673	0.958444	0.944579	1.16515	0.985534	0.84584	1.16619	0.877757	0.942126
CLCA4	1.00394	1.02711	0.537748	0.97744	0.523555	0.535639	1.00531	1.0962	0.526754
CLCN1	1.0269	0.98144	1.15004	1.04632	1.17179	1.11991	1.03815	0.944156	1.1559
CLCN2	1.0774	0.97163	0.869627	1.10886	0.895018	0.807153	1.11357	0.917327	0.866327
CLCN3	1.36941	0.893204	0.31726	1.53314	0.355194	0.231677	1.58745	0.721475	0.308779
CLCN4	1.78256	0.718887	0	2.47962	0	0	2.58926	0.446183	0
CLCN5	1.08304	0.968719	0.942864	1.11801	0.973311	0.870573	1.1194	0.906887	0.94101
CLCN6	1.17362	0.942128	0.613244	1.24572	0.650914	0.522522	1.26451	0.840156	0.60597
CLCN7	1.40732	0.834202	0.775402	1.68702	0.929513	0.550979	1.69122	0.614493	0.77097
CLCNKA	1.08301	0.961957	1.00453	1.12584	1.04426	0.927534	1.12395	0.893392	1.00466
CLCNKB	1.07243	0.960515	1.18207	1.11652	1.23066	1.10223	1.10712	0.88852	1.18777
CLDN17	0.965112	1.02334	0.858601	0.943097	0.839016	0.889639	0.951406	1.0741	0.853781
CLEC14A	1.21792	0.93354	0.472888	1.30462	0.506553	0.388276	1.33188	0.814086	0.465357
CLEC16A	1.23527	0.926202	0.464487	1.3337	0.501496	0.37602	1.35988	0.794523	0.457483
CLEC1A	0.917113	1.03796	0.901138	0.883573	0.868182	0.982581	0.891266	1.13489	0.896618
CLEC3A	0.832252	1.08271	0.829018	0.768679	0.765692	0.996114	0.780274	1.30163	0.822332
CLEC4F	1.04259	0.997025	0.779662	1.04571	0.781988	0.74781	1.05928	0.990551	0.772037
CLEC4M	1.1724	0.932345	0.903768	1.25748	0.96935	0.770869	1.26034	0.824498	0.898947
CLGN	1.02064	1.00025	0.902602	1.02038	0.902374	0.884352	1.02726	1.00087	0.897777
CLIC6	1.15599	0.94497	0.872481	1.22331	0.923289	0.754748	1.22663	0.835355	0.869543
CLINT1	1.1368	0.991373	0.317483	1.14669	0.320245	0.279278	1.19262	0.971545	0.308212
CLIP1	1.22582	0.956292	0.337745	1.28185	0.353181	0.275525	1.33352	0.870621	0.327725
CLIP2	1.39875	0.870143	0.316883	1.60749	0.364173	0.226548	1.65494	0.676546	0.309777
CLIP3	1.34818	0.879642	0.36453	1.53264	0.414407	0.270388	1.56729	0.69612	0.358228
CLIP4	1.104	0.984321	0.551979	1.12158	0.560771	0.499982	1.14691	0.949828	0.542645
CLK1	1.21183	0.955775	0.50195	1.2679	0.525176	0.41421	1.30129	0.860669	0.491538
CLK2	1.09646	1.00554	0.276075	1.09042	0.274556	0.251789	1.13878	1.01748	0.26753
CLK3	1.21327	0.938157	0.468148	1.29325	0.499008	0.385856	1.32443	0.827448	0.459618
CLMN	1.06325	0.989438	0.717009	1.0746	0.724663	0.674359	1.08884	0.966247	0.709802
CLN3	1.13645	0.929426	1.24295	1.22274	1.33733	1.09371	1.20516	0.810707	1.25252
CLNK	0.999982	1.0116	0.811072	0.98852	0.801775	0.811086	0.999976	1.03865	0.804336
CLOCK	1.18537	1.01831	0.0909991	1.16406	0.0893631	0.0767682	1.25864	1.06335	0.0857749
CLP1	1.07332	0.961367	1.17189	1.11646	1.21899	1.09184	1.10626	0.88803	1.17815
CLPB	1.06123	0.980466	0.836959	1.08237	0.853633	0.788668	1.08938	0.942688	0.832629
CLPTM1	1.48832	0.827594	0.426789	1.79837	0.515698	0.286758	1.84357	0.605135	0.417768
CLPTM1L	1.28741	0.903776	0.50834	1.42448	0.562462	0.394853	1.4557	0.751394	0.499447
CLPX	1.1505	0.986794	0.276646	1.16589	0.280348	0.240458	1.21975	0.959672	0.26762
CLSPN	1.04851	1.04446	0.323561	1.00388	0.309789	0.308591	1.06569	1.15769	0.309469
CLSTN1	1.28528	0.934092	0.19597	1.37597	0.209798	0.152473	1.43516	0.812714	0.189905
CLSTN2	1.20905	0.952615	0.335302	1.26919	0.351981	0.277326	1.31168	0.861229	0.327096
CLSTN3	1.13524	0.97159	0.365123	1.16844	0.375799	0.321626	1.1982	0.913412	0.35841
CLTCL1	0.988635	1.00863	0.929691	0.980178	0.921738	0.940378	0.9842	1.02735	0.927158
CLU	1.32983	0.904778	0.357346	1.46978	0.394954	0.268717	1.5143	0.743598	0.349092
CLUL1	1.1579	0.965478	0.667592	1.1993	0.691463	0.576554	1.22407	0.894718	0.656387
CLVS1	1.23314	0.935733	0.385434	1.31783	0.411907	0.312564	1.36021	0.82505	0.376343
CLVS2	1.26239	0.917753	0.478169	1.37552	0.521021	0.378782	1.41007	0.782199	0.468883
CMIP	1.55161	0.812849	0.134691	1.90885	0.165703	0.0868077	1.9818	0.576994	0.130985
CMKLR1	0.997496	1.01253	0.6393	0.985157	0.631391	0.640904	0.996508	1.04215	0.634122
CMYA5	1.03269	1.01082	0.661509	1.02164	0.654431	0.640572	1.04457	1.0363	0.650615
CNBD1	0.839816	1.05407	1.07169	0.796738	1.01672	1.2761	0.795926	1.20501	1.07536
CNDP1	1.04171	0.990222	0.848995	1.052	0.857379	0.815002	1.05896	0.96952	0.844618
CNDP2	1.1222	0.969356	0.599288	1.15768	0.618233	0.534028	1.17796	0.907917	0.591327
CNGA1	1.06573	0.985161	0.825635	1.08178	0.838071	0.774715	1.09237	0.954271	0.819113
CNGA2	0.983617	1.01098	0.921985	0.972931	0.911968	0.937342	0.976932	1.03432	0.919551
CNGA3	1.00378	1.00895	0.796828	0.99488	0.789759	0.793824	1.00533	1.02811	0.790974
CNGA4	0.975438	1.02238	0.780729	0.954089	0.763641	0.800387	0.965361	1.07037	0.774629
CNGB1	1.07224	0.984718	0.740477	1.08888	0.751969	0.69059	1.10218	0.952126	0.733499
CNGB3	0.908414	1.04377	0.895448	0.870321	0.857899	0.985727	0.878361	1.15142	0.890865
CNKSR1	1.01396	1.00715	0.769155	1.00676	0.763695	0.758569	1.01967	1.02234	0.76216
CNKSR2	1.47059	0.8631	0.397349	1.70385	0.460374	0.270196	1.76401	0.659958	0.385957
CNKSR3	1.17118	0.94605	0.674153	1.23797	0.712598	0.575618	1.25677	0.849485	0.665762
CNNM1	1.2833	0.909541	0.337894	1.41094	0.371499	0.2633	1.44646	0.758701	0.331582
CNNM2	1.62778	0.763013	0.329528	2.13335	0.431877	0.202441	2.18259	0.504692	0.323225
CNNM3	1.27187	0.893829	0.763061	1.42295	0.853699	0.59995	1.43017	0.72544	0.758543
CNNM4	1.29633	0.875746	1.00072	1.48026	1.1427	0.771963	1.47332	0.687361	1.00073
CNOT1	1.56995	0.821127	0.113361	1.91195	0.138056	0.072207	2.00706	0.592132	0.109345
CNOT10	1.01663	1.03776	0.33414	0.97964	0.321983	0.328675	1.02294	1.13	0.323853
CNOT2	1.56815	0.837706	0.121737	1.87196	0.145322	0.077631	1.9707	0.613536	0.117103
CNOT3	1.46745	0.843399	0.25501	1.73992	0.30236	0.173778	1.7987	0.630054	0.248571
CNOT4	1.3961	0.890701	0.16432	1.56742	0.184484	0.1177	1.64232	0.719745	0.158712
CNOT6	1.41395	0.870701	0.385933	1.62392	0.443245	0.272948	1.67547	0.678883	0.376274
CNR1	1.53597	0.794657	0.434554	1.93287	0.546844	0.282919	1.96391	0.54844	0.428394
CNST	1.21187	0.970347	0.377138	1.2489	0.388663	0.311203	1.30516	0.908929	0.364502
CNTLN	1.04441	1.0028	0.769859	1.04149	0.767707	0.737121	1.06022	1.00915	0.75931
CNTN1	1.19968	0.953021	0.46596	1.25882	0.48893	0.388403	1.29569	0.863284	0.455659
CNTN2	1.12054	0.967388	0.549767	1.15832	0.5683	0.490625	1.18048	0.906539	0.542062
CNTN3	1.19232	0.953758	0.557754	1.25013	0.584796	0.467788	1.28078	0.86347	0.54704
CNTN4	1.21139	0.94898	0.468101	1.27652	0.493268	0.386415	1.31394	0.852484	0.457681
CNTN5	1.01559	1.03588	0.335035	0.980413	0.323429	0.329891	1.02143	1.12507	0.325215
CNTN6	0.999069	1.0164	0.7673	0.982953	0.754923	0.768015	0.998731	1.05417	0.758542
CNTNAP1	1.57234	0.765693	0.735232	2.05349	0.960217	0.467602	2.05756	0.516546	0.728206
CNTNAP2	1.06809	1.00696	0.447983	1.0607	0.444887	0.419426	1.09644	1.02223	0.437255
CNTNAP3	1.14164	0.960062	0.680823	1.18913	0.709145	0.596355	1.20747	0.883558	0.672412
CNTNAP3B	0.98758	1.00854	0.936548	0.979219	0.928618	0.948326	0.982913	1.02765	0.9342
CNTNAP4	1.08464	1.00595	0.384749	1.07823	0.382475	0.354725	1.11914	1.01941	0.374303
CNTNAP5	1.13381	0.975058	0.484365	1.16282	0.496755	0.4272	1.19515	0.925128	0.474474
CNTROB	1.10553	0.994329	0.437556	1.11183	0.440052	0.395791	1.15222	0.982632	0.426201
COASY	1.05339	0.991971	0.666123	1.06191	0.671515	0.632365	1.07705	0.975471	0.659243
COBL	1.08874	0.992678	0.323035	1.09677	0.325418	0.296706	1.1282	0.976931	0.316495
COBLL1	0.967607	1.04862	0.355163	0.922746	0.338697	0.367053	0.956638	1.18208	0.345972
COCH	1.06204	0.978903	0.906997	1.08492	0.926544	0.854017	1.08823	0.934853	0.904418
COG1	1.07212	0.991634	0.633452	1.08117	0.638796	0.590838	1.10273	0.974074	0.624145
COG2	1.17106	0.989612	0.21773	1.18335	0.220015	0.185926	1.24715	0.967376	0.209408
COG3	1.20354	0.970042	0.231993	1.24071	0.239158	0.192759	1.30215	0.911058	0.223855
COG4	1.11917	0.974049	0.533331	1.14899	0.54754	0.47654	1.1734	0.921454	0.524937
COG5	1.05476	1.01299	0.498094	1.04123	0.491704	0.472233	1.07662	1.04209	0.486017
COG6	0.987749	1.01886	0.771168	0.969467	0.756895	0.780733	0.983462	1.06447	0.763287
COG7	1.12189	0.978801	0.46585	1.14619	0.475939	0.415238	1.17791	0.936167	0.456491
COG8	1.26316	0.906862	0.583357	1.39289	0.64327	0.461824	1.41437	0.756561	0.575864
COIL	1.04163	1.01979	0.369819	1.02141	0.362643	0.355041	1.05805	1.0665	0.36046
COL10A1	0.84341	1.11422	0.381792	0.756952	0.342655	0.452677	0.780889	1.38442	0.374423
COL11A1	0.941309	1.065	0.34405	0.883855	0.323051	0.365502	0.917595	1.21614	0.335427
COL11A2	0.960676	1.03502	0.699592	0.928169	0.675919	0.728229	0.941744	1.10135	0.693276
COL12A1	1.08529	1.00233	0.340351	1.08277	0.33956	0.313603	1.1217	1.00746	0.331692
COL13A1	1.02719	1.00665	0.539135	1.0204	0.535574	0.524865	1.04174	1.01824	0.531781
COL14A1	1.11364	0.979231	0.543878	1.13726	0.555413	0.488378	1.16534	0.937792	0.533999
COL15A1	0.954651	1.04636	0.334405	0.912356	0.319589	0.35029	0.935853	1.15371	0.328663
COL16A1	0.951914	1.04013	0.683251	0.91519	0.656892	0.717766	0.930248	1.12075	0.67622
COL17A1	0.918274	1.05267	0.690276	0.872328	0.655738	0.75171	0.88556	1.17185	0.683751
COL18A1	1.18826	0.935637	0.412691	1.27	0.44108	0.347306	1.29649	0.82859	0.406487
COL19A1	0.942535	1.05688	0.503753	0.89181	0.476642	0.534466	0.918723	1.18207	0.493919
COL1A1	0.867719	1.07565	0.978865	0.806694	0.910024	1.12809	0.80936	1.22972	0.978364
COL1A2	0.825273	1.125	0.204896	0.733575	0.182129	0.248276	0.754783	1.42801	0.201232
COL20A1	1.14089	0.933178	1.17213	1.22259	1.25606	1.02738	1.21101	0.816078	1.17763
COL21A1	1.01576	1.00592	0.820221	1.00979	0.815396	0.807494	1.02238	1.01769	0.812965
COL22A1	0.881236	1.07876	0.646135	0.816897	0.598961	0.733214	0.831764	1.25143	0.639212
COL23A1	1.00451	1.00778	0.743216	0.996762	0.73748	0.739875	1.00686	1.02156	0.738315
COL24A1	0.873758	1.09135	0.559724	0.80062	0.512872	0.640594	0.83069	1.32182	0.546348
COL25A1	0.969926	1.04551	0.473092	0.927705	0.452498	0.48776	0.95615	1.13727	0.463772
COL27A1	0.996913	1.03105	0.344645	0.96689	0.334266	0.345713	0.995468	1.0944	0.337953
COL28A1	0.852093	1.0939	0.570628	0.778947	0.521644	0.669678	0.80181	1.33827	0.560121
COL2A1	0.968087	1.03035	0.702957	0.939571	0.682251	0.726131	0.951819	1.08521	0.697346
COL3A1	0.897627	1.0765	0.541997	0.833842	0.503482	0.603811	0.852682	1.2383	0.534586
COL4A1	1.11688	0.983013	0.104192	1.13618	0.105992	0.0932878	1.18614	0.954743	0.10125
COL4A2	0.992006	1.01399	0.778605	0.978322	0.767865	0.78488	0.988016	1.03942	0.773657
COL4A3	0.843829	1.09927	0.639	0.767628	0.581296	0.757262	0.783057	1.33065	0.6316
COL4A4	0.896337	1.06945	0.655489	0.838128	0.61292	0.731297	0.852163	1.21882	0.648962
COL4A5	0.653618	1.17363	1.25263	0.556921	1.06731	1.91645	0.555145	1.6659	1.26298
COL4A6	0.962402	1.04955	0.402411	0.916962	0.383411	0.418132	0.944663	1.14866	0.394686
COL5A1	1.08107	0.981557	0.490015	1.10138	0.499222	0.453269	1.12482	0.949369	0.482891
COL5A2	0.948506	1.0744	0.0200521	0.882826	0.0186636	0.0211407	0.92553	1.24064	0.0194283
COL5A3	0.946965	1.04264	0.630383	0.908242	0.604606	0.665688	0.922738	1.12907	0.624086
COL6A1	1.20587	0.935347	0.394639	1.28922	0.421917	0.327265	1.31933	0.823496	0.387912
COL6A2	1.18793	0.930002	0.702905	1.27734	0.75581	0.591705	1.28899	0.809819	0.697349
COL6A3	1.00277	1.01958	0.506817	0.983512	0.497085	0.505418	1.00394	1.06274	0.499601
COL6A5	0.964257	1.02516	0.816264	0.940593	0.796232	0.846521	0.951458	1.08474	0.809947
COL6A6	0.913948	1.04497	0.798356	0.874615	0.763997	0.873524	0.884229	1.15882	0.792878
COL7A1	0.923791	1.04322	0.889131	0.885516	0.852293	0.962481	0.890702	1.13246	0.886456
COL8A1	0.938161	1.0617	0.44181	0.883644	0.416136	0.470932	0.909088	1.18485	0.433908
COL8A2	1.06716	0.971802	0.718682	1.09813	0.739535	0.67345	1.10706	0.927169	0.714545
COL9A1	0.969496	1.02357	0.836505	0.947169	0.81724	0.862824	0.955602	1.06927	0.831907
COL9A2	0.894826	1.0727	0.654794	0.834182	0.610418	0.731756	0.847631	1.2222	0.648668
COL9A3	0.973387	1.02978	0.609858	0.945234	0.592219	0.626532	0.959681	1.084	0.604056
COLEC10	1.00151	1.02819	0.441253	0.974053	0.429154	0.440586	1.0021	1.09597	0.432384
COLEC11	1.30862	0.899272	0.298122	1.4552	0.331515	0.227814	1.49702	0.74033	0.291855
COLEC12	1.20568	0.957611	0.305922	1.25905	0.319464	0.253735	1.31153	0.87982	0.296837
COLQ	0.881198	1.05578	0.983647	0.834642	0.931679	1.11626	0.837332	1.18484	0.983105
COMP	1.16474	0.944551	0.873483	1.23312	0.924761	0.749937	1.23712	0.833487	0.869872
COPA	1.14845	0.985443	0.055186	1.16542	0.0560012	0.0480524	1.22131	0.956035	0.0533794
COPB1	1.16929	0.978431	0.143604	1.19507	0.14677	0.122813	1.24741	0.932779	0.139167
COPB2	1.2834	0.943671	0.228246	1.36	0.241871	0.177846	1.42708	0.837608	0.220104
COPS2	1.95994	0.705044	0.0962666	2.77989	0.13654	0.049117	2.94732	0.423618	0.0920037
CORIN	1.03634	0.992449	0.909596	1.04422	0.916517	0.877703	1.0493	0.975027	0.90589
CORO1A	1.45911	0.837872	0.411975	1.74145	0.491693	0.282346	1.77332	0.611029	0.405731
CORO1B	1.2486	0.926563	0.344249	1.34756	0.371534	0.275708	1.37872	0.791705	0.338311
CORO1C	1.25825	0.936257	0.290494	1.34391	0.310271	0.230871	1.39149	0.818313	0.282962
CORO2A	1.12935	0.956639	0.800605	1.18054	0.836893	0.708908	1.19024	0.87566	0.794721
CORO2B	1.23502	0.930188	0.394737	1.32772	0.424362	0.319618	1.3618	0.807523	0.387202
CORO6	1.00454	1.00096	0.930842	1.00358	0.929944	0.926631	1.00632	1.00314	0.928989
CORO7	1.16023	0.948333	0.634326	1.22344	0.668885	0.546724	1.24073	0.853808	0.627241
COX10	1.11678	0.974515	0.490167	1.14599	0.502986	0.43891	1.17295	0.925228	0.481837
CP	1.15879	0.972553	0.524359	1.19149	0.539157	0.452506	1.22653	0.915066	0.512605
CPA1	1.12556	0.945462	1.04187	1.19049	1.10197	0.925645	1.18508	0.846329	1.04331
CPA2	0.969115	1.02556	0.793604	0.94496	0.773823	0.818895	0.957479	1.08338	0.786577
CPA3	0.82772	1.07656	0.889175	0.768854	0.825938	1.07425	0.777173	1.28725	0.884594
CPA4	1.07984	0.960928	1.07992	1.12375	1.12384	1.00007	1.11571	0.889867	1.08368
CPA5	1.15614	0.940965	0.902225	1.22867	0.95883	0.78038	1.23105	0.83358	0.899149
CPA6	0.883642	1.04734	0.969216	0.843702	0.925408	1.09684	0.847882	1.16781	0.967698
CPAMD8	1.12588	0.965536	0.634881	1.16607	0.657542	0.563896	1.1844	0.898022	0.627199
CPB1	0.910144	1.03367	1.07121	0.8805	1.03632	1.17696	0.878593	1.11016	1.07462
CPB2	1.3445	0.891346	0.679599	1.5084	0.762441	0.505464	1.53296	0.719521	0.668396
CPD	1.15326	0.973546	0.346548	1.1846	0.355965	0.300494	1.22438	0.919747	0.338157
CPE	1.13565	0.981808	0.331177	1.15669	0.337314	0.291619	1.19943	0.945307	0.32251
CPEB2	1.18797	0.942123	0.608044	1.26095	0.645397	0.511833	1.28226	0.836746	0.599849
CPEB3	1.25442	0.930636	0.368737	1.34792	0.39622	0.293949	1.39112	0.809012	0.35998
CPEB4	1.30939	0.922702	0.205814	1.41908	0.223056	0.157183	1.48643	0.792553	0.198872
CPED1	1.05062	1.00262	0.6805	1.04787	0.67872	0.647713	1.07052	1.00833	0.669674
CPN1	1.15967	0.946683	0.745459	1.22498	0.787443	0.64282	1.23767	0.849367	0.738725
CPN2	1.23044	0.912022	0.727705	1.34913	0.797903	0.59142	1.36131	0.771451	0.721372
CPNE1	0.949546	1.03752	0.701905	0.915205	0.676521	0.739201	0.930393	1.12494	0.694213
CPNE2	1.23681	0.915267	0.634884	1.35131	0.69366	0.513325	1.36882	0.775104	0.627874
CPNE3	0.932662	1.0259	1.00599	0.909118	0.980593	1.07862	0.91017	1.08803	1.00626
CPNE4	1.31431	0.90629	0.353503	1.4502	0.390055	0.268966	1.49492	0.751735	0.345305
CPNE5	1.3126	0.87442	0.908285	1.50111	1.03873	0.691975	1.49896	0.684146	0.906021
CPNE6	1.65555	0.744917	0.677199	2.22246	0.909093	0.409048	2.23101	0.477238	0.670449
CPNE7	1.24515	0.90667	0.85967	1.37332	0.948162	0.690416	1.37645	0.751783	0.855747
CPNE8	1.25901	0.934901	0.380876	1.34668	0.407398	0.302521	1.3907	0.815035	0.371513
CPNE9	1.187	0.939422	0.529382	1.26354	0.563519	0.445984	1.28621	0.832546	0.522152
CPS1	1.19575	0.940882	0.560829	1.27089	0.596067	0.469017	1.29601	0.83486	0.55219
CPSF2	1.32991	0.897539	0.735491	1.48173	0.819454	0.553037	1.49753	0.722315	0.726723
CPSF3	1.41916	0.886381	0.44584	1.60107	0.502989	0.314158	1.65868	0.706267	0.432694
CPSF6	1.55723	0.802245	0	1.9411	0	0	2.03522	0.571701	0
CPT1A	1.15945	0.94043	0.905356	1.23289	0.962704	0.780849	1.23534	0.833241	0.901949
CPT1B	1.24301	0.909217	0.783885	1.36712	0.862154	0.630634	1.37648	0.762434	0.777746
CPT1C	1.18075	0.951157	0.536051	1.24138	0.563578	0.453992	1.27022	0.860915	0.526551
CPVL	0.946646	1.0492	0.61685	0.902253	0.587923	0.651617	0.927114	1.1658	0.605498
CPXCR1	0.931343	1.02142	1.03417	0.91181	1.01248	1.11041	0.911149	1.07854	1.0358
CPXM1	1.15034	0.952146	0.711891	1.20816	0.74767	0.618852	1.22229	0.86213	0.704976
CPXM2	1.02829	0.995924	0.852514	1.03249	0.856003	0.829063	1.03955	0.987018	0.848098
CPZ	1.1014	0.957415	1.03756	1.15039	1.08371	0.942039	1.14632	0.874278	1.03879
CR1	1.05143	1.00577	0.539796	1.0454	0.536701	0.513393	1.07182	1.01891	0.529941
CR1L	1.04791	0.973386	1.14606	1.07656	1.17739	1.09366	1.06708	0.918733	1.15242
CR2	1.06023	0.997936	0.66896	1.06242	0.670344	0.630958	1.08402	0.993399	0.658852
CRAT	1.18399	0.937695	0.671855	1.26266	0.716496	0.567452	1.27842	0.826952	0.664866
CRB1	1.00359	1.01903	0.687307	0.984854	0.674475	0.684848	1.00488	1.06438	0.677307
CRB2	1.17031	0.937362	0.811445	1.24852	0.865669	0.693357	1.25435	0.821326	0.807565
CREB3L1	1.21435	0.935052	0.446991	1.2987	0.478039	0.36809	1.32391	0.814434	0.440407
CREB3L2	1.06669	0.999938	0.41665	1.06676	0.416676	0.3906	1.09494	0.9998	0.408814
CREB3L3	1.16308	0.924396	1.1162	1.2582	1.20749	0.959692	1.24685	0.797881	1.12037
CREB5	1.20056	0.956337	0.422537	1.25537	0.441829	0.351952	1.29141	0.866646	0.413362
CREBBP	1.38749	0.872936	0.546607	1.58945	0.62617	0.393954	1.62694	0.687303	0.53526
CRHBP	1.06033	1.00355	0.306256	1.05658	0.305172	0.28883	1.08729	1.01118	0.30008
CRHR1	1.17909	0.929101	0.870199	1.26906	0.936603	0.738028	1.27307	0.810816	0.866103
CRHR2	1.02416	0.988616	1.01761	1.03595	1.02933	0.993607	1.03422	0.966064	1.01837
CRIM1	1.23796	0.956947	0.239039	1.29365	0.249793	0.193091	1.35416	0.872838	0.230992
CRISP1	1.03793	0.996736	0.855825	1.04133	0.858627	0.824551	1.05085	0.988958	0.849593
CRISP2	0.920507	1.04192	0.86036	0.883473	0.825746	0.934659	0.894815	1.14443	0.85363
CRISP3	1.03211	1.02718	0.503446	1.0048	0.490126	0.487782	1.0444	1.08937	0.489459
CRISPLD1	0.960006	1.04356	0.607382	0.919933	0.582029	0.632686	0.947325	1.16002	0.594621
CRISPLD2	1.10798	0.983638	0.542005	1.12641	0.551021	0.489184	1.15489	0.94958	0.531877
CRLF2	1.15847	0.933314	1.06857	1.24124	1.14492	0.9224	1.23019	0.814761	1.07206
CRMP1	1.43652	0.846592	0.280771	1.69683	0.331648	0.195452	1.74279	0.634934	0.275044
CRNKL1	1.17725	0.980848	0.381207	1.20024	0.388651	0.323811	1.25745	0.942378	0.368022
CRNN	1.12136	0.957979	0.978115	1.17054	1.02102	0.87226	1.16892	0.872702	0.976999
CROCC	1.11898	0.979053	0.575417	1.14292	0.587728	0.514232	1.1724	0.937511	0.564363
CROT	0.918351	1.03319	0.958721	0.888854	0.927927	1.04396	0.893143	1.11711	0.956663
CRP	1.11745	0.953565	0.955944	1.17186	1.00249	0.85547	1.1717	0.868889	0.954194
CRTAC1	1.154	0.957487	0.400953	1.20524	0.418756	0.347447	1.22954	0.874531	0.395058
CRTAM	1.0664	1.0012	0.614885	1.06512	0.614151	0.576601	1.09283	1.0038	0.603133
CRTC1	1.49179	0.834534	0.196457	1.78758	0.235409	0.131692	1.84163	0.607072	0.192061
CRTC2	1.0835	0.984555	0.429837	1.1005	0.43658	0.39671	1.12358	0.953933	0.423507
CRTC3	1.18338	0.950998	0.456858	1.24435	0.480399	0.386064	1.27886	0.863609	0.447543
CRX	1.23282	0.92971	0.489104	1.32603	0.526083	0.396736	1.35882	0.80949	0.479839
CRY1	1.18679	0.942194	0.745635	1.2596	0.791382	0.628279	1.27687	0.839626	0.736385
CRY2	1.23807	0.924939	0.524562	1.33854	0.567132	0.423695	1.36889	0.799195	0.51527
CRYBB1	1.10409	0.96394	0.848995	1.1454	0.880755	0.768952	1.15254	0.896693	0.844093
CRYBG3	0.995862	1.0391	0.393173	0.958385	0.378377	0.394807	0.994487	1.14668	0.382546
CS	1.25063	0.920617	0.503477	1.35846	0.546891	0.40258	1.39223	0.791204	0.493773
CSAD	1.0846	0.973564	0.821911	1.11405	0.844229	0.757799	1.12219	0.921086	0.816895
CSDE1	1.38386	0.908414	0.118182	1.52338	0.130098	0.0854004	1.60665	0.754074	0.113598
CSE1L	1.36964	0.91214	0.113439	1.50157	0.124365	0.0828234	1.58515	0.764628	0.108989
CSF1	1.19071	0.963085	0.177201	1.23635	0.183993	0.14882	1.28322	0.888937	0.172439
CSF1R	1.23393	0.925123	0.549803	1.3338	0.594303	0.445572	1.36109	0.79849	0.540888
CSF2RA	1.09685	0.986244	0.574287	1.11214	0.582298	0.523581	1.14025	0.958787	0.563674
CSF2RB	1.22582	0.93432	0.4669	1.31199	0.499722	0.380889	1.34395	0.817264	0.458246
CSF3R	1.16369	0.954843	0.587687	1.21873	0.61548	0.505019	1.24273	0.869812	0.578732
CSGALNACT1	0.997676	1.01451	0.738195	0.983409	0.727639	0.739915	0.996784	1.04779	0.731135
CSGALNACT2	1.16187	0.97109	0.521417	1.19646	0.53694	0.448775	1.23204	0.911445	0.509621
CSMD2	1.19032	0.94833	0.398324	1.25517	0.420027	0.334637	1.28844	0.853569	0.390605
CSMD3	1.11341	0.998237	0.362379	1.11538	0.363019	0.325467	1.16008	0.994271	0.351891
CSNK1A1	2.11842	0.617835	0	3.42878	0	0	3.64138	0.337183	0
CSNK1A1L	1.08911	0.98009	0.757651	1.11123	0.773043	0.695662	1.12661	0.939553	0.749335
CSNK1G2	1.52079	0.814805	0.353304	1.86645	0.433606	0.232316	1.90609	0.573852	0.347203
CSNK2A1	1.51829	0.818309	0.564276	1.8554	0.689563	0.371653	1.89171	0.590827	0.552979
CSPG4	1.1342	0.958739	0.608495	1.18301	0.634683	0.536497	1.19991	0.880521	0.601864
CSPG5	1.17724	0.960618	0.164645	1.22551	0.171394	0.139856	1.26627	0.883807	0.160801
CSPP1	0.974544	1.03224	0.67989	0.944107	0.658655	0.697649	0.966071	1.11376	0.668732
CSRNP1	1.16131	0.959527	0.306313	1.21029	0.319233	0.263766	1.24024	0.879675	0.300865
CSRNP2	1.20661	0.955898	0.145577	1.26228	0.152294	0.12065	1.30991	0.869463	0.141698
CSRNP3	1.22273	0.943719	0.515952	1.29565	0.546721	0.421968	1.32577	0.83223	0.506491
CSTF1	1.90958	0.700565	0.159535	2.72577	0.227724	0.0835446	2.84205	0.415649	0.154282
CSTF2	1.30782	0.903227	0.346428	1.44794	0.383545	0.26489	1.49853	0.755606	0.337536
CSTF3	1.62089	0.788771	0.613384	2.05496	0.777645	0.378424	2.08258	0.534155	0.602672
CT47B1	1.067	0.982114	0.814596	1.08643	0.829431	0.763445	1.09451	0.943532	0.809717
CTAGE1	0.983691	1.04933	0.378008	0.937445	0.360237	0.384275	0.978329	1.18552	0.366296
CTBP1	1.66988	0.735324	0.574796	2.27094	0.781691	0.344215	2.28616	0.461675	0.569413
CTBP2	1.13747	0.951497	0.725124	1.19545	0.762088	0.637491	1.20742	0.864705	0.719155
CTC1	1.07507	0.986343	0.675025	1.08995	0.684371	0.62789	1.10902	0.959545	0.666308
CTCF	1.72931	0.771239	0.303123	2.24225	0.393034	0.175286	2.31037	0.496543	0.295409
CTCFL	1.18446	0.955183	0.579208	1.24004	0.606384	0.489004	1.26838	0.866964	0.568771
CTDP1	1.26499	0.899984	0.898486	1.40557	0.998336	0.710272	1.40566	0.731327	0.895831
CTIF	1.2695	0.925208	0.352458	1.37212	0.38095	0.277636	1.41042	0.789103	0.345071
CTNNA1	1.40622	0.858333	0.522082	1.63831	0.608252	0.371267	1.67117	0.657488	0.512902
CTNNA3	0.933317	1.05704	0.458011	0.882956	0.433297	0.490734	0.910967	1.21188	0.447982
CTNNAL1	1.01372	1.02313	0.549772	0.990803	0.537345	0.542332	1.01871	1.0795	0.538709
CTNNB1	1.22598	0.913314	0.936121	1.34234	1.02497	0.763569	1.34063	0.766565	0.93382
CTNNBL1	1.23536	0.929507	0.532517	1.32904	0.572903	0.431064	1.35402	0.799709	0.524549
CTNND1	1.00295	1.04339	0.195179	0.96124	0.187061	0.194604	1.00412	1.14952	0.189211
CTNND2	1.32512	0.909668	0.221572	1.4567	0.243575	0.16721	1.51756	0.76246	0.214938
CTPS2	1.33506	0.905873	0.256569	1.47378	0.283228	0.192178	1.53073	0.751193	0.249334
CTR9	1.51526	0.844764	0.35132	1.79371	0.41588	0.231855	1.86421	0.6308	0.340313
CTSA	1.13741	0.983123	0.284741	1.15694	0.289629	0.25034	1.20279	0.949368	0.276823
CTSC	1.04655	0.997652	0.722922	1.04901	0.724623	0.690767	1.06551	0.992638	0.714526
CTSD	1.35397	0.876225	0.442807	1.54523	0.505357	0.327043	1.57665	0.689716	0.43561
CTSE	1.08816	0.962464	0.994456	1.1306	1.03324	0.913886	1.12873	0.892863	0.994254
CTSG	1.12663	0.957317	0.793121	1.17686	0.828484	0.703976	1.18702	0.878428	0.787115
CTTN	1.22259	0.941542	0.566347	1.2985	0.60151	0.463236	1.32983	0.832843	0.555419
CTTNBP2	1.02724	1.02096	0.427755	1.00615	0.418975	0.416414	1.03808	1.06959	0.418234
CTTNBP2NL	1.08226	1.00791	0.350807	1.07376	0.348053	0.324144	1.11748	1.02511	0.340773
CUBN	1.03691	1.00776	0.608952	1.02893	0.604262	0.587273	1.05148	1.02528	0.599336
CUL1	1.95542	0.665096	0.265834	2.94006	0.399693	0.135948	3.0693	0.393071	0.255777
CUL2	1.48302	0.894176	0.159612	1.65853	0.178502	0.107627	1.75976	0.716048	0.152466
CUL3	1.80165	0.762335	0.238294	2.36334	0.312584	0.132264	2.46491	0.487192	0.230059
CUL4A	1.41464	0.887263	0.0605788	1.59439	0.068276	0.0428226	1.67603	0.710153	0.0584117
CUL4B	1.69845	0.786052	0.334762	2.16073	0.425878	0.197099	2.24262	0.528464	0.324082
CUL5	1.88566	0.732355	0.364388	2.57479	0.497556	0.193242	2.67038	0.452981	0.351752
CUL7	1.09711	0.979099	0.634982	1.12053	0.648537	0.578776	1.14069	0.937173	0.626421
CUL9	1.17672	0.957717	0.414875	1.22867	0.433192	0.35257	1.26332	0.876853	0.406287
CUX1	1.39509	0.885349	0.259956	1.57575	0.29362	0.186337	1.64033	0.708646	0.252094
CUX2	1.26942	0.927039	0.229984	1.36933	0.248084	0.181173	1.41998	0.800833	0.223907
CUZD1	1.01793	1.00527	0.799262	1.0126	0.795074	0.785181	1.02462	1.01726	0.792294
CWC22	1.14907	0.98608	0.477903	1.16529	0.484649	0.415903	1.20666	0.95402	0.465019
CWF19L2	0.952529	1.0508	0.534793	0.906476	0.508937	0.561445	0.938461	1.19783	0.521289
CWH43	1.02754	0.997833	0.852517	1.02977	0.854368	0.829672	1.03834	0.993164	0.847154
CX3CR1	1.18382	0.942844	0.503987	1.25559	0.53454	0.425729	1.27901	0.839129	0.496885
CXCR1	0.99435	1.00156	1.02515	0.9928	1.02355	1.03097	0.991919	1.00476	1.02584
CXCR2	1.23364	0.908316	0.641178	1.35816	0.705898	0.519744	1.37367	0.76603	0.634924
CXCR4	1.12408	0.948163	0.909565	1.18553	0.959291	0.809167	1.18778	0.859419	0.906816
CXorf66	0.977323	1.02579	0.729283	0.952748	0.710945	0.746205	0.969193	1.08739	0.72055
CXXC1	1.37912	0.881696	0.432265	1.56417	0.490265	0.313435	1.60659	0.697668	0.422855
CYB5R4	1.09046	0.98937	0.614965	1.10218	0.621572	0.563949	1.12544	0.965016	0.605092
CYBB	1.13603	0.937161	1.08134	1.21221	1.15384	0.951856	1.20054	0.830454	1.08553
CYLC1	1.00842	1.05827	0.113537	0.952898	0.107285	0.112588	1.01134	1.22175	0.108657
CYLC2	0.796531	1.09818	0.679463	0.725316	0.618715	0.853027	0.743101	1.40996	0.669033
CYLD	1.34692	0.907219	0.375415	1.48467	0.413809	0.278721	1.53965	0.751889	0.364739
CYP11A1	1.05006	0.994185	0.695352	1.0562	0.699419	0.662202	1.07178	0.98219	0.687882
CYP11B1	1.12676	0.96074	0.712709	1.1728	0.741833	0.632532	1.18722	0.886823	0.705667
CYP11B2	1.13921	0.951087	0.787002	1.19779	0.827476	0.690834	1.2077	0.862751	0.781182
CYP17A1	1.18289	0.931647	0.754618	1.26968	0.809983	0.637943	1.28043	0.815947	0.7487
CYP19A1	1.0473	0.992679	0.761794	1.05503	0.767412	0.727388	1.06661	0.976804	0.755504
CYP1A1	0.88112	1.05781	0.839823	0.832964	0.793924	0.953131	0.840543	1.20603	0.835524
CYP1A2	1.03501	0.988915	0.911128	1.04661	0.921341	0.880308	1.04994	0.965903	0.908744
CYP1B1	1.04371	0.981516	1.02516	1.06337	1.04446	0.982219	1.06177	0.941751	1.0258
CYP24A1	0.985101	1.00145	1.0717	0.983672	1.07015	1.08791	0.979603	1.0046	1.07517
CYP26A1	1.10796	0.957079	0.947748	1.15765	0.990251	0.855401	1.15816	0.876745	0.946087
CYP26B1	1.27197	0.91689	0.239385	1.38727	0.261084	0.1882	1.4232	0.771196	0.234884
CYP26C1	1.10274	0.961832	0.918284	1.1465	0.954724	0.83273	1.14821	0.883854	0.916461
CYP27A1	1.01896	0.97977	1.19887	1.04	1.22363	1.17657	1.0269	0.941164	1.20902
CYP27C1	1.08096	0.992813	0.50721	1.08879	0.510882	0.469221	1.11658	0.977822	0.497912
CYP2A13	1.00859	0.998626	0.940558	1.00998	0.941852	0.932545	1.01213	0.99565	0.939072
CYP2A6	1.10838	0.970948	0.612265	1.14155	0.630584	0.552394	1.15846	0.912845	0.605438
CYP2A7	1.04693	0.990407	0.747562	1.05707	0.754804	0.714055	1.06694	0.969941	0.742369
CYP2B6	1.0226	1.00091	0.744279	1.02167	0.743599	0.727828	1.03217	1.00287	0.738807
CYP2C18	0.99951	1.00484	0.893068	0.994692	0.888763	0.893506	0.999323	1.016	0.890107
CYP2C19	1.00595	1.00101	0.923673	1.00494	0.922742	0.918206	1.0083	1.00324	0.921422
CYP2C8	0.882423	1.03281	1.32835	0.85439	1.28615	1.50535	0.843873	1.11369	1.34263
CYP2C9	0.974097	1.03078	0.55789	0.94501	0.541231	0.572725	0.964445	1.10645	0.549934
CYP2D6	1.0425	0.975034	1.1787	1.06919	1.20889	1.13065	1.06117	0.925564	1.18426
CYP2E1	1.11315	0.965319	0.703852	1.15315	0.729139	0.632304	1.16693	0.899172	0.697249
CYP2F1	1.03336	0.992366	0.829806	1.04131	0.83619	0.80302	1.0476	0.976204	0.826046
CYP2S1	1.12797	0.95681	0.662171	1.17889	0.692061	0.587046	1.19273	0.877823	0.656148
CYP2W1	1.19901	0.941015	0.371691	1.27416	0.394989	0.309999	1.3031	0.832981	0.365514
CYP39A1	1.052	0.998073	0.704742	1.05403	0.706103	0.66991	1.07285	0.993918	0.695414
CYP3A4	0.855265	1.07465	0.643851	0.795851	0.599124	0.752809	0.810901	1.29134	0.635977
CYP3A43	0.996101	1.01571	0.734394	0.980689	0.723031	0.737269	0.994635	1.05235	0.727029
CYP3A5	0.963059	1.02823	0.746283	0.936622	0.725797	0.774909	0.949325	1.09497	0.739466
CYP3A7	0.977008	1.03641	0.430568	0.942687	0.415442	0.4407	0.968505	1.12811	0.42236
CYP46A1	1.53252	0.799489	0.411125	1.91688	0.514234	0.268266	1.95697	0.56014	0.403779
CYP4A11	0.89456	1.05892	0.758044	0.844784	0.715864	0.847394	0.857291	1.20408	0.751187
CYP4A22	0.886344	1.05183	0.95665	0.842665	0.909506	1.07932	0.846421	1.17685	0.955163
CYP4B1	0.988997	1.00672	0.946342	0.982399	0.940028	0.95687	0.984694	1.02184	0.944892
CYP4F11	1.02703	1.00915	0.619873	1.01771	0.614253	0.603561	1.03809	1.02922	0.611076
CYP4F12	0.915455	1.03178	1.07219	0.887257	1.03917	1.17121	0.88575	1.10835	1.07468
CYP4F2	1.15813	0.935465	1.01999	1.23802	1.09035	0.88072	1.23306	0.817868	1.02066
CYP4F22	0.965459	1.03198	0.639245	0.93554	0.619435	0.662115	0.952097	1.10671	0.631593
CYP4F3	0.985579	1.01971	0.718086	0.966526	0.704204	0.728593	0.980036	1.06534	0.711142
CYP4F8	1.09212	0.967937	0.866425	1.12829	0.895126	0.793346	1.13378	0.905696	0.862496
CYP4V2	0.928535	1.03402	0.894373	0.897982	0.864944	0.963209	0.905049	1.11926	0.890207
CYP4X1	1.07195	0.972401	0.948768	1.10238	0.975697	0.885085	1.10372	0.91885	0.946974
CYP4Z1	0.881278	1.05992	0.808458	0.831458	0.762755	0.917371	0.842868	1.21571	0.801854
CYP7A1	0.918997	1.0492	0.726089	0.8759	0.692039	0.790088	0.890714	1.17146	0.71815
CYP7B1	0.987726	1.01873	0.797737	0.969566	0.783071	0.807651	0.983126	1.06055	0.790027
CYP8B1	0.956356	1.03008	0.762263	0.928425	0.740001	0.79705	0.940287	1.10175	0.755772
CYSLTR1	1.07965	0.991888	0.492112	1.08848	0.496136	0.455807	1.11241	0.973556	0.484201
CYSLTR2	0.821776	1.08099	0.930341	0.760209	0.860641	1.13211	0.764381	1.30081	0.928508
CYTH3	1.58042	0.769363	0.94979	2.05419	1.23451	0.600974	2.03185	0.508967	0.948119
CYTH4	1.2009	0.938074	0.552558	1.28018	0.589035	0.460119	1.30482	0.827547	0.544272
CYTIP	1.03677	1.01238	0.561201	1.02409	0.554338	0.541298	1.05084	1.04124	0.550642
D2HGDH	1.21827	0.914225	0.848848	1.33257	0.92849	0.696764	1.33573	0.768063	0.845768
DAAM1	1.14954	0.977775	0.384408	1.17567	0.393146	0.334401	1.21697	0.931925	0.374598
DAAM2	1.05536	1.00134	0.453987	1.05395	0.453381	0.430172	1.07945	1.00421	0.446245
DAB1	1.21567	0.972374	0.117581	1.25021	0.120921	0.0967207	1.31889	0.915977	0.113048
DAB2	1.08026	1.01511	0.155228	1.06418	0.152917	0.143695	1.115	1.04906	0.150115
DAB2IP	1.30715	0.905931	0.246482	1.44288	0.272076	0.188564	1.48642	0.749596	0.241077
DACH2	0.990079	1.03861	0.304517	0.953269	0.293195	0.307568	0.986287	1.13459	0.297211
DACT1	1.17478	0.965869	0.189365	1.21629	0.196056	0.161192	1.25988	0.897608	0.184572
DAG1	1.16793	0.944842	0.555608	1.23611	0.588043	0.475721	1.25451	0.844276	0.549289
DAGLA	1.46601	0.84108	0.263292	1.74301	0.313041	0.179598	1.78973	0.619004	0.257944
DAGLB	1.14338	0.960547	0.603765	1.19034	0.628563	0.528053	1.21137	0.884619	0.595564
DAO	0.958777	1.02	0.963611	0.939978	0.944718	1.00504	0.942922	1.0632	0.962148
DAPK1	1.32384	0.895389	0.390438	1.47851	0.436054	0.294928	1.51641	0.728517	0.382765
DAPK3	1.41187	0.844003	0.668862	1.67282	0.792488	0.473744	1.68577	0.626051	0.662878
DARS2	0.909621	1.06203	0.618432	0.856492	0.58231	0.679878	0.879202	1.22195	0.607579
DAXX	1.20442	0.940232	0.496457	1.28098	0.528016	0.412197	1.31009	0.832835	0.487874
DAZAP1	1.41043	0.869874	0.16006	1.62142	0.184004	0.113483	1.7036	0.692615	0.154423
DBF4	1.17267	0.988015	0.326613	1.1869	0.330575	0.278521	1.24291	0.960798	0.31527
DBH	1.09281	0.977781	0.685052	1.11764	0.700619	0.626873	1.13363	0.932415	0.677553
DBN1	1.16313	0.98022	0.090736	1.1866	0.092567	0.0780103	1.24173	0.93976	0.0878186
DBX2	1.1436	0.953422	0.738308	1.19947	0.774377	0.6456	1.215	0.871255	0.730302
DCAF12	1.20729	0.935799	0.559251	1.29011	0.597619	0.46323	1.31896	0.827278	0.549529
DCAF12L1	1.56116	0.823206	0	1.89644	0	0	1.98453	0.588875	0
DCAF12L2	1.25566	0.918849	0.500453	1.36656	0.544652	0.398557	1.39554	0.780688	0.492128
DCAF13	1.10594	0.984474	0.563852	1.12339	0.572744	0.509837	1.14947	0.950435	0.554014
DCAF15	1.43663	0.852559	0.217906	1.68508	0.255591	0.151678	1.73446	0.641684	0.213201
DCAF4	1.09908	0.976848	0.642127	1.12513	0.657346	0.584238	1.14436	0.931125	0.633888
DCAF4L1	1.46856	0.837159	0.343489	1.75422	0.410303	0.233895	1.80719	0.622798	0.335384
DCAF4L2	1.12112	0.960238	0.801103	1.16755	0.834275	0.714553	1.17783	0.886087	0.794911
DCAF5	1.29162	0.923618	0.198628	1.39843	0.215054	0.153782	1.4516	0.788406	0.193201
DCAF6	1.32781	0.933658	0.360839	1.42216	0.386478	0.271755	1.48975	0.810832	0.347768
DCAF8L1	1.30595	0.914935	0.448575	1.42736	0.490281	0.343487	1.46711	0.765385	0.438728
DCAF8L2	1.24364	0.9418	0.447926	1.32049	0.475606	0.360174	1.36105	0.830807	0.43735
DCBLD1	1.12654	0.970251	0.632538	1.16108	0.651932	0.561487	1.18397	0.911873	0.622962
DCBLD2	1.13865	0.985783	0.328524	1.15507	0.333262	0.28852	1.202	0.956592	0.319033
DCC	1.09507	0.998687	0.35948	1.09651	0.359952	0.328272	1.13689	0.995897	0.350132
DCDC1	1.05411	1.00397	0.654026	1.04994	0.651441	0.620455	1.07507	1.01274	0.642499
DCDC2	1.05523	0.995543	0.707208	1.05996	0.710374	0.670191	1.07781	0.986047	0.698364
DCHS1	1.04791	1.00144	0.369186	1.0464	0.368657	0.352309	1.07083	1.00432	0.363317
DCHS2	1.03356	0.995921	0.784995	1.0378	0.78821	0.759504	1.04742	0.987121	0.779609
DCLK1	1.45218	0.838989	0.370094	1.73087	0.441119	0.254853	1.77704	0.625835	0.362281
DCLK2	1.18635	0.956903	0.252821	1.23978	0.264208	0.213108	1.28095	0.874948	0.246864
DCLK3	1.13933	0.967756	0.512064	1.17729	0.529126	0.449443	1.2018	0.901002	0.504055
DCLRE1A	1.04834	1.01583	0.50192	1.032	0.494098	0.478775	1.06642	1.05351	0.489826
DCLRE1B	0.996801	1.0338	0.433807	0.964214	0.419625	0.435199	0.995531	1.11224	0.424129
DCN	1.20103	0.940842	0.387513	1.27655	0.411879	0.322651	1.31272	0.84007	0.3796
DCP1B	1.00907	1.01979	0.610406	0.989481	0.598559	0.604922	1.01271	1.06354	0.600429
DCST1	1.02083	0.994917	0.921561	1.02604	0.926269	0.902757	1.02967	0.984555	0.919038
DCST2	0.96369	1.0256	0.813966	0.939638	0.793651	0.844635	0.94906	1.08134	0.808708
DCT	0.925687	1.03511	0.917935	0.894287	0.886798	0.991625	0.900184	1.11944	0.914652
DCTN1	1.09684	0.988789	0.398881	1.10928	0.403404	0.363663	1.14164	0.966001	0.390664
DCX	0.959647	0.967612	2.15737	0.991768	2.22959	2.24809	0.944208	0.904636	2.23505
DDB1	1.5415	0.813853	0.200472	1.89407	0.246325	0.13005	1.95993	0.579147	0.195314
DDC	1.04484	1.00116	0.614924	1.04364	0.614213	0.588532	1.06362	1.00366	0.606467
DDHD1	1.17817	0.966494	0.417002	1.21902	0.431458	0.353939	1.2583	0.897561	0.406998
DDHD2	1.13809	0.973219	0.586248	1.16941	0.60238	0.515114	1.19827	0.918733	0.575187
DDI1	0	1.45649	0	0	0		0		0
DDN	1.1437	0.971275	0.373796	1.17753	0.384851	0.32683	1.21517	0.916861	0.365318
DDO	1.08628	0.947366	1.30057	1.14663	1.37283	1.19727	1.12318	0.850607	1.31731
DDR1	1.15199	0.956232	0.552165	1.20472	0.577439	0.479314	1.22643	0.873236	0.544639
DDR2	1.23385	0.928542	0.57745	1.3288	0.621889	0.468008	1.35646	0.804989	0.567742
DDX1	1.16932	0.994034	0.135209	1.17634	0.136021	0.115631	1.24335	0.980784	0.129779
DDX10	1.03778	1.00548	0.69811	1.03212	0.694307	0.672697	1.05177	1.01815	0.688276
DDX11	1.08998	0.97296	0.814885	1.12027	0.837532	0.747615	1.12957	0.91935	0.809216
DDX17	1.44901	0.861523	0.092867	1.68192	0.107794	0.0640898	1.76216	0.665725	0.0897763
DDX18	0.982288	1.04662	0.310063	0.938537	0.296253	0.315654	0.975695	1.16449	0.30158
DDX20	1.1855	0.973216	0.39951	1.21813	0.410505	0.336997	1.26792	0.918176	0.387438
DDX21	1.1175	0.998101	0.326577	1.11962	0.327199	0.29224	1.16861	0.994028	0.316442
DDX23	1.3664	0.865231	0.587068	1.57923	0.67851	0.429647	1.60709	0.678311	0.577576
DDX24	1.05449	1.01171	0.378081	1.04228	0.373706	0.358545	1.07766	1.03745	0.369117
DDX27	1.07135	1.00202	0.367542	1.06919	0.366799	0.343064	1.10274	1.00636	0.359454
DDX31	1.06857	0.996953	0.531092	1.07183	0.532715	0.497013	1.09815	0.990505	0.521739
DDX39A	1.57904	0.801006	0.21043	1.97132	0.262707	0.133264	2.03103	0.552264	0.205615
DDX3X	1.32584	0.868072	1.03988	1.52734	1.19792	0.784315	1.5115	0.672605	1.04154
DDX4	1.18906	0.969978	0.335237	1.22587	0.345613	0.281934	1.27456	0.907862	0.325493
DDX42	1.24351	0.950696	0.074482	1.308	0.0783447	0.0598964	1.36992	0.856829	0.0720238
DDX43	1.11619	0.965083	0.893252	1.15658	0.92557	0.800267	1.16231	0.893635	0.888323
DDX46	1.7999	0.742421	0.33083	2.42436	0.44561	0.183805	2.50713	0.467612	0.320941
DDX5	1.69607	0.785464	0.0461851	2.15932	0.0587997	0.0272307	2.28145	0.53233	0.0443508
DDX50	1.28992	0.910858	0.750664	1.41616	0.824129	0.581945	1.43295	0.757477	0.74103
DDX51	1.32597	0.873123	0.755801	1.51866	0.86563	0.569998	1.52669	0.684527	0.75054
DDX53	1.13995	1.00154	0.234381	1.1382	0.234021	0.205606	1.19749	1.00508	0.225648
DDX54	1.0583	1.00253	0.41082	1.05563	0.409784	0.388188	1.08401	1.00793	0.403089
DDX55	1.10735	0.978542	0.585462	1.13163	0.5983	0.528708	1.15469	0.934407	0.576541
DDX56	1.08863	0.978873	0.609947	1.11212	0.623112	0.560291	1.13052	0.937773	0.602568
DDX58	0.953229	1.03151	0.799771	0.924107	0.775337	0.839013	0.937729	1.10976	0.791816
DDX59	1.10571	0.989747	0.571953	1.11716	0.577878	0.517274	1.14835	0.967416	0.55997
DDX60	1.05727	0.998582	0.702017	1.05877	0.703015	0.663991	1.07903	0.995398	0.691904
DDX60L	1.01144	1.02024	0.656818	0.991373	0.643784	0.649386	1.01549	1.06889	0.645298
DEAF1	1.27476	0.890185	0.897147	1.43202	1.00782	0.703778	1.43155	0.718342	0.894341
DEF6	1.36944	0.888555	0.482089	1.5412	0.542555	0.352035	1.586	0.715196	0.47058
DEF8	1.1999	0.931534	0.787405	1.2881	0.845278	0.656223	1.29736	0.80667	0.781638
DENND1A	1.22359	0.930677	0.41934	1.31474	0.450575	0.342712	1.34553	0.810246	0.412031
DENND1C	1.07261	0.991207	0.537725	1.08213	0.542495	0.501322	1.10434	0.972606	0.529762
DENND2A	1.10077	0.977598	0.557614	1.12599	0.570392	0.506567	1.1475	0.93296	0.549813
DENND2C	0.864067	1.09386	0.525084	0.789926	0.480029	0.607689	0.82367	1.36169	0.510193
DENND2D	1.08581	0.989196	0.592047	1.09767	0.598513	0.545258	1.12494	0.968095	0.581399
DENND3	1.2933	0.895915	0.752687	1.44355	0.840133	0.581991	1.45394	0.724884	0.74649
DENND4A	1.21295	0.960194	0.381517	1.26323	0.397333	0.314537	1.30736	0.876813	0.371487
DENND4B	1.17545	0.933346	0.717629	1.2594	0.768878	0.610513	1.27285	0.824519	0.711023
DENND4C	1.07884	1.00707	0.380459	1.07126	0.377787	0.352657	1.10947	1.02395	0.370644
DENND5A	1.00966	0.753017	5.54613	1.34082	7.36522	5.49307	1.01343	0.489677	6.70552
DENND5B	1.2648	0.932054	0.446474	1.357	0.479022	0.353001	1.40151	0.81146	0.435242
DEPDC1	0.982024	1.04285	0.552812	0.94167	0.530096	0.562931	0.976221	1.15564	0.538368
DEPDC1B	1.00903	1.01904	0.675495	0.99018	0.662877	0.66945	1.01251	1.06133	0.664767
DEPDC5	1.1648	0.937744	0.937354	1.24213	0.999584	0.804735	1.24215	0.824394	0.935077
DEPTOR	0.983006	1.00682	0.987751	0.976346	0.981059	1.00483	0.977042	1.02376	0.987407
DES	1.31355	0.891104	0.668648	1.47407	0.75036	0.509038	1.49179	0.717486	0.660837
DET1	1.1684	0.975205	0.167941	1.19811	0.172211	0.143736	1.25144	0.9263	0.162749
DGCR2	1.13915	0.967165	0.470612	1.17782	0.486589	0.413127	1.20273	0.899702	0.463229
DGCR8	1.35496	0.888181	0.302767	1.52555	0.340885	0.223451	1.56929	0.710114	0.29626
DGKA	1.15313	0.969505	0.396536	1.1894	0.409009	0.343877	1.22718	0.910504	0.387461
DGKB	1.27081	0.927937	0.426974	1.3695	0.460132	0.335984	1.41113	0.79891	0.417025
DGKD	1.32657	0.886639	0.618683	1.49618	0.697784	0.466376	1.51666	0.707748	0.610911
DGKE	1.22783	0.927796	0.695314	1.32338	0.749426	0.566295	1.34347	0.803145	0.685856
DGKG	1.12093	0.964168	0.782686	1.16259	0.811773	0.698246	1.17367	0.892174	0.776281
DGKH	1.25	0.930243	0.501222	1.34373	0.538808	0.400979	1.37863	0.806104	0.491026
DGKI	1.2477	0.922533	0.544626	1.35247	0.590359	0.436505	1.38107	0.790523	0.535422
DGKK	1.11331	0.996852	0.263427	1.11682	0.264258	0.236616	1.16372	0.990112	0.255657
DGKQ	1.3094	0.886043	0.783147	1.47781	0.88387	0.598096	1.48345	0.699042	0.779032
DGKZ	1.25423	0.916986	0.553789	1.36778	0.603924	0.441536	1.3928	0.776127	0.545587
DHCR7	1.16451	0.920517	1.1321	1.26506	1.22986	0.972174	1.24847	0.793213	1.13854
DHDH	1.07407	0.952866	1.44589	1.1272	1.51741	1.34618	1.10573	0.860777	1.46406
DHRS2	1.02577	1.00357	0.568547	1.02212	0.566527	0.554266	1.03688	1.01134	0.562783
DHRS7C	1.13463	0.937938	1.06835	1.2097	1.13904	0.941587	1.20219	0.831372	1.07075
DHTKD1	1.09686	0.967887	0.864881	1.13325	0.893576	0.788506	1.13973	0.905576	0.860229
DHX15	2.01342	0.650949	0.224478	3.09306	0.344848	0.111491	3.21298	0.366975	0.217162
DHX16	1.15051	0.93313	1.06308	1.23296	1.13926	0.924005	1.22418	0.81815	1.06565
DHX29	1.25707	0.948753	0.360612	1.32498	0.380091	0.286866	1.38325	0.85245	0.348833
DHX30	1.54253	0.798217	0.167816	1.93246	0.210239	0.108793	1.99718	0.562095	0.16376
DHX32	1.16675	0.978121	0.324958	1.19285	0.332227	0.278515	1.24209	0.932746	0.315273
DHX33	1.02481	1.00176	0.752857	1.02301	0.751534	0.734629	1.03505	1.00555	0.746468
DHX34	1.11491	0.963964	0.750378	1.15659	0.778429	0.673037	1.16807	0.894047	0.744282
DHX35	1.0274	0.983152	1.10239	1.04501	1.12129	1.07299	1.03848	0.948793	1.10679
DHX36	1.23023	0.959474	0.337109	1.28219	0.351348	0.274022	1.33793	0.878939	0.326301
DHX37	1.23172	0.929623	0.412104	1.32497	0.443302	0.334575	1.35858	0.808153	0.404327
DHX38	1.31758	0.899375	0.529132	1.465	0.588333	0.401593	1.49577	0.734252	0.519899
DHX40	1.38951	0.882307	0.500999	1.57486	0.567829	0.360557	1.61608	0.697829	0.48991
DHX57	1.01312	1.03904	0.42329	0.975055	0.407385	0.417807	1.01797	1.13376	0.41026
DHX58	1.02333	1.00582	0.700783	1.01741	0.696729	0.684806	1.03274	1.01865	0.693217
DHX8	1.46394	0.819232	0.854062	1.78697	1.04252	0.583399	1.78311	0.588151	0.849338
DHX9	1.73414	0.760776	0.183683	2.27943	0.241442	0.105922	2.40535	0.508576	0.176116
DIAPH1	1.12573	0.976843	0.386341	1.15241	0.3955	0.343192	1.18643	0.931616	0.378243
DIAPH2	1.19508	0.961845	0.447835	1.24249	0.4656	0.374732	1.28641	0.887733	0.436003
DIAPH3	1.09799	0.986769	0.61109	1.11271	0.619284	0.556555	1.13763	0.957861	0.600733
DICER1	1.29905	0.896352	0.831354	1.44926	0.927486	0.639972	1.4551	0.724923	0.825438
DIDO1	1.15116	0.977195	0.16906	1.17802	0.173005	0.146861	1.22467	0.931474	0.164402
DIO3	1.48306	0.846431	0.253561	1.75213	0.299565	0.170972	1.8058	0.623954	0.247653
DIP2A	1.22248	0.923047	0.564995	1.32439	0.612098	0.462173	1.34496	0.792503	0.558011
DIP2B	1.23738	0.933947	0.40186	1.32489	0.430281	0.324767	1.36339	0.817074	0.393161
DIP2C	1.45382	0.840551	0.44371	1.7296	0.527881	0.305204	1.76747	0.623196	0.435539
DIRAS3	1.21621	0.92603	0.47416	1.31336	0.512035	0.389867	1.33481	0.797515	0.468274
DIS3	1.06251	0.99152	0.750655	1.0716	0.757076	0.706494	1.08598	0.972049	0.742834
DIS3L	0.988122	1.01389	0.853196	0.974587	0.841509	0.863452	0.983853	1.04606	0.847534
DIS3L2	1.07635	0.997012	0.428047	1.07958	0.42933	0.397683	1.1093	0.990543	0.41965
DISP1	1.09637	0.987234	0.567645	1.11054	0.574985	0.517751	1.13573	0.959052	0.558019
DISP2	1.1557	0.95892	0.403772	1.20521	0.421069	0.349373	1.2335	0.88077	0.396908
DIXDC1	1.0689	0.991115	0.735901	1.07848	0.742499	0.688467	1.09692	0.972589	0.72631
DKK2	1.07595	1.01407	0.253884	1.06102	0.250361	0.235963	1.10728	1.04653	0.246112
DLAT	0.90969	1.05535	0.633445	0.861982	0.600224	0.69633	0.877721	1.19648	0.62587
DLC1	1.02813	1.02338	0.357379	1.00464	0.349215	0.347603	1.03905	1.07981	0.348758
DLEC1	1.02691	0.998527	0.804751	1.02843	0.805938	0.783662	1.03797	0.995378	0.799267
DLG1	1.07231	1.01312	0.329425	1.05842	0.32516	0.307212	1.1003	1.04479	0.320081
DLG2	1.22903	0.949461	0.361476	1.29445	0.380717	0.294115	1.34433	0.855861	0.351252
DLG3	1.30856	0.890088	0.55961	1.47014	0.628713	0.427654	1.49686	0.723902	0.551031
DLG4	1.29389	0.895038	0.552096	1.44562	0.616841	0.426696	1.46933	0.7311	0.544568
DLG5	1.29331	0.916789	0.189282	1.4107	0.206462	0.146354	1.45979	0.773784	0.184573
DLGAP1	1.30493	0.917658	0.308214	1.42202	0.33587	0.236193	1.46743	0.770112	0.300848
DLGAP2	1.39166	0.896765	0.120412	1.55186	0.134274	0.0865241	1.61636	0.719976	0.116794
DLGAP3	1.29846	0.910424	0.260076	1.42622	0.285665	0.200296	1.46856	0.758286	0.254438
DLGAP4	1.31867	0.912507	0.114086	1.44511	0.125025	0.0865159	1.50083	0.761742	0.110969
DLGAP5	1.011	1.01399	0.739961	0.997052	0.72975	0.731908	1.01466	1.04905	0.730308
DLK1	1.23137	0.931004	0.481211	1.32262	0.516873	0.390794	1.34673	0.800432	0.474372
DLL1	1.57937	0.813991	0.211771	1.94027	0.260163	0.134086	2.00207	0.565712	0.206633
DLL3	1.14861	0.940921	0.891005	1.22073	0.94695	0.775722	1.22292	0.833415	0.888631
DLX5	1.1427	0.975292	0.417962	1.17165	0.428551	0.365766	1.20945	0.92628	0.408207
DMBT1	1.13948	0.966787	0.658764	1.17863	0.681395	0.578126	1.20288	0.903092	0.648119
DMBX1	1.07648	1.00088	0.262747	1.07553	0.262516	0.244081	1.1126	1.00268	0.256551
DMD	0.953918	0.964282	1.63084	0.989251	1.69125	1.70962	0.93863	0.895902	1.6963
DMGDH	1.11754	0.961381	0.861715	1.16243	0.896331	0.771083	1.16971	0.888026	0.856329
DMKN	0.959759	1.02688	0.827701	0.934634	0.806033	0.862406	0.944342	1.08722	0.822151
DMP1	1.10897	0.994726	0.509345	1.11485	0.512046	0.459297	1.14689	0.981202	0.498116
DMPK	1.21877	0.921459	0.702542	1.32265	0.762424	0.576436	1.33438	0.784443	0.6969
DMRT1	1.24413	0.923825	0.524385	1.34672	0.567624	0.421487	1.37083	0.786711	0.516909
DMRT3	1.1222	0.96908	0.576508	1.158	0.594902	0.513731	1.17924	0.908141	0.568587
DMRTA1	1.02869	1.02139	0.430063	1.00715	0.421057	0.418067	1.04099	1.06745	0.420144
DMRTB1	1.18695	0.949862	0.227303	1.2496	0.239301	0.191502	1.28582	0.857518	0.222667
DMRTC2	1.16264	0.942375	0.692087	1.23373	0.734407	0.595272	1.24861	0.84324	0.685222
DMTF1	1.32688	0.9329	0.225212	1.42232	0.24141	0.16973	1.4894	0.803862	0.217366
DMWD	1.49613	0.826726	0.136477	1.8097	0.165081	0.09122	1.86451	0.596619	0.133499
DMXL1	1.12575	1.00453	0.230546	1.12068	0.229507	0.204793	1.17527	1.01545	0.222451
DMXL2	1.17023	0.986264	0.284519	1.18653	0.288481	0.243131	1.24177	0.955577	0.274881
DNA2	1.12184	0.980252	0.601314	1.14444	0.613428	0.536006	1.17204	0.93807	0.590209
DNAAF1	0.967761	1.0272	0.718213	0.942136	0.699195	0.742139	0.955819	1.09222	0.711096
DNAH1	1.09464	0.978392	0.64544	1.11881	0.659694	0.589637	1.13771	0.935552	0.637278
DNAH10	1.0941	0.979874	0.669668	1.11657	0.683422	0.612072	1.13556	0.939262	0.661028
DNAH11	0.984086	1.029	0.641251	0.956356	0.623181	0.651621	0.978317	1.09865	0.630965
DNAH12	1.01115	1.01485	0.721158	0.996358	0.710608	0.713206	1.01492	1.05178	0.711288
DNAH14	1.03625	1.02189	0.637288	1.01405	0.623637	0.614995	1.04845	1.07448	0.621365
DNAH17	1.1958	0.935218	0.641114	1.27864	0.685523	0.536136	1.29777	0.821965	0.633248
DNAH2	1.07334	0.989202	0.64189	1.08506	0.648897	0.598028	1.10572	0.967345	0.632928
DNAH3	1.04903	0.995071	0.737927	1.05422	0.741583	0.703439	1.06951	0.984787	0.730003
DNAH5	1.01889	1.00726	0.75598	1.01154	0.750533	0.741968	1.02618	1.0234	0.748068
DNAH6	1.02438	1.01677	0.621239	1.00748	0.610992	0.606453	1.03352	1.05553	0.609717
DNAH7	0.975964	1.02438	0.762844	0.952736	0.744688	0.781631	0.967746	1.08435	0.754435
DNAH8	1.07087	1.00407	0.528292	1.06653	0.526151	0.49333	1.09856	1.01335	0.516702
DNAH9	1.00888	1.01827	0.601345	0.99078	0.590557	0.596053	1.01238	1.05984	0.592147
DNAI1	1.02052	1.01419	0.620205	1.00625	0.611529	0.607734	1.02855	1.0463	0.610434
DNAI2	1.18209	0.938694	0.797825	1.2593	0.849931	0.674925	1.26878	0.82553	0.791813
DNAJB8	1.1388	0.967838	0.418219	1.17664	0.432117	0.367247	1.20241	0.901258	0.411494
DNAJC1	1.02502	1.01521	0.664218	1.00966	0.654268	0.648006	1.03481	1.04825	0.652445
DNAJC10	1.01668	1.0225	0.582058	0.994308	0.569249	0.572507	1.02251	1.07849	0.570116
DNAJC11	1.21844	0.941621	0.402768	1.29398	0.427739	0.33056	1.33652	0.840853	0.393089
DNAJC13	1.06737	1.02537	0.190588	1.04096	0.185873	0.178559	1.09365	1.08777	0.183803
DNAJC14	1.05014	1.03421	0.123197	1.0154	0.119121	0.117314	1.07165	1.11204	0.118576
DNAJC16	0.985303	1.03062	0.689344	0.956028	0.668862	0.699626	0.979536	1.09645	0.677852
DNAJC2	1.15812	1.00988	0.183087	1.14679	0.181295	0.158089	1.22204	1.03314	0.174545
DNAJC21	1.1075	0.991186	0.581549	1.11735	0.586721	0.525099	1.14849	0.971073	0.569209
DNAJC5B	0.981952	1.02662	0.71147	0.956486	0.693019	0.724546	0.97511	1.08679	0.701971
DNAJC6	1.06635	1.02041	0.184936	1.04502	0.181236	0.173429	1.09419	1.06739	0.178911
DNAJC7	1.42474	0.865253	0.35581	1.64661	0.411221	0.249737	1.69913	0.668123	0.346972
DNER	1.19346	0.955216	0.331908	1.24941	0.347469	0.278106	1.28781	0.86783	0.324477
DNHD1	1.04275	1.01549	0.458492	1.02685	0.451499	0.439694	1.06099	1.04869	0.4479
DNM1	1.53092	0.808844	0.309785	1.89272	0.382997	0.202352	1.94161	0.570627	0.303488
DNM1L	1.43222	0.867904	0.339734	1.65021	0.391442	0.237208	1.70565	0.670355	0.330877
DNM2	1.41902	0.852109	0.245325	1.6653	0.287903	0.172883	1.71426	0.648145	0.240026
DNM3	1.12384	0.970793	0.58866	1.15765	0.60637	0.523792	1.1817	0.914158	0.579488
DNMBP	1.03477	1.00341	0.699054	1.03125	0.696677	0.675563	1.04869	1.01088	0.690471
DNMT1	1.494	0.84219	0.133696	1.77394	0.158748	0.0894888	1.84796	0.626059	0.129704
DNMT3A	1.07455	0.906237	2.11643	1.18573	2.3354	1.9696	1.10559	0.751555	2.21809
DNMT3B	1.17024	0.958961	0.474149	1.22032	0.49444	0.405173	1.25275	0.880691	0.464778
DNMT3L	0.980809	0.997972	1.1806	0.982802	1.183	1.2037	0.973485	0.993674	1.18898
DNTT	1.00911	1.00284	0.893417	1.00625	0.890886	0.885349	1.01247	1.00928	0.889338
DOC2A	1.18693	0.945828	0.340863	1.25491	0.360386	0.287182	1.28364	0.844997	0.33521
DOCK1	1.18483	0.956513	0.443177	1.2387	0.463326	0.374043	1.27611	0.875057	0.433284
DOCK10	1.08003	1.00242	0.458914	1.07742	0.457805	0.42491	1.11323	1.00774	0.447964
DOCK11	1.28881	0.934177	0.351992	1.37962	0.376794	0.273114	1.4346	0.812726	0.341447
DOCK2	1.27795	0.920578	0.407852	1.38821	0.443039	0.319144	1.43036	0.785188	0.398469
DOCK3	1.2216	0.946588	0.322999	1.29053	0.341224	0.264406	1.33469	0.847235	0.314959
DOCK4	1.1938	0.9569	0.41963	1.24757	0.438531	0.351509	1.28768	0.874444	0.409642
DOCK5	1.0745	0.998359	0.486215	1.07627	0.487014	0.452504	1.1067	0.994881	0.476401
DOCK6	1.1056	0.965552	0.747144	1.14504	0.773801	0.675785	1.15473	0.897877	0.742047
DOCK7	1.16488	0.986227	0.357048	1.18115	0.362035	0.306511	1.23516	0.956558	0.345134
DOCK8	1.08566	0.997393	0.37548	1.0885	0.376461	0.345854	1.12307	0.991784	0.367032
DOCK9	1.25857	0.934893	0.307383	1.34622	0.32879	0.244233	1.39469	0.817342	0.299286
DOK2	0.97595	1.01186	0.972348	0.96451	0.960951	0.996309	0.966358	1.0372	0.971384
DOK3	1.07266	0.983492	0.647585	1.09066	0.658455	0.603719	1.10618	0.950639	0.640846
DOK5	1.07144	0.987397	0.752379	1.08512	0.761982	0.702211	1.10007	0.960317	0.744326
DOK6	1.27557	0.947919	0.186662	1.34566	0.196918	0.146336	1.41632	0.849733	0.17967
DOT1L	1.38576	0.869783	0.231727	1.59323	0.266419	0.16722	1.63825	0.67591	0.226932
DPEP2	1.09004	0.953492	1.19	1.1432	1.24804	1.09171	1.13018	0.866363	1.19784
DPEP3	1.17757	0.929135	0.910043	1.26738	0.979451	0.772816	1.2684	0.805288	0.907688
DPF1	1.54351	0.822767	0.305137	1.876	0.370866	0.19769	1.93582	0.587955	0.297467
DPF2	1.35062	0.887893	0.424286	1.52115	0.477857	0.314142	1.56732	0.719129	0.41423
DPF3	1.16142	0.948564	0.675	1.2244	0.711602	0.581183	1.24115	0.854365	0.66749
DPH2	0.931821	1.02792	1.12826	0.906512	1.09761	1.21081	0.902706	1.08401	1.13265
DPP10	1.07087	1.0233	0.267203	1.04649	0.26112	0.249519	1.09895	1.07859	0.257786
DPP3	1.11244	0.97335	0.587505	1.1429	0.603591	0.528122	1.16531	0.921641	0.578956
[truncated: 6,802 more rows]
